# Supplementary material for: Ferroptosis‐Related Long Noncoding RNAs Have Excellent Predictive Ability for Multiomic Characteristics of Bladder Cancer
Source: Hindawi journal article supplement (doi:10.1155/2022/9316847), 2022-01-01
Supplement: f1 [file 9316847.f1.zip]

| id           | futime            | fustat            | AL136084.3        | AL731567.1  | AC006160.1  | AC012568.1 | AC034236.2 |
|--------------|-------------------|-------------------|-------------------|-------------|-------------|------------|------------|
| riskScore    | risk              |                   |                   |             |             |            |            |
| TCGA-ZF-AA51 | 4.6958904109589   | 0                 | 0.429602124       | 2.517325863 | 0.083820148 |            |            |
|              | 0.066594397       | 0.507606484       | 0.718707588       | 702786      | high        |            |            |
| TCGA-BT-A42C | 2.39178082191781  | 0                 | 0.1415353         | 2.2526940   | 0.04142267  |            |            |
|              | 0.03290996        | 0.7814992         | 0.661283220       | 147806      | high        |            |            |
| TCGA-DK-A3IT | 1.77534246575342  | 0                 | 0.7856667         | 0.9539293   | 0.1532923   |            |            |
|              | 0.04059648        | 0.5950788         | 0.734896798       | 418092      | high        |            |            |
| TCGA-DK-A3IV | 0.805479452054795 | 1                 | 0.1753007         | 5.0971520   | 2.052187    |            |            |
|              | 0.0326089         | 1.3383830         | 3.978213002       | 30122       | low         |            |            |
| TCGA-2F-A9KW | 0.695890410958904 | 1                 | 5.6066411         | 11.354620   | 0.09944709  | 0          |            |
|              | 0.9574099         | 0.68047816154325  | high              |             |             |            |            |
| TCGA-GU-A762 | 0.635616438356164 | 1                 | 0.374333255       | 0.400159819 | 0.082166149 | 0          |            |
|              | 0.625177224       | 0.757345493557312 | high              |             |             |            |            |
| TCGA-XF-AAME | 7.74794520547945  | 1                 | 2.0436241         | 1.1327660   | 0.1246043   | 0          |            |
|              | 0.7545911         | 0.813978747341553 | high              |             |             |            |            |
| TCGA-XF-AAN0 | 4.70684931506849  | 1                 | 0.177699203       | 3.478365734 | 0.166421227 | 0          |            |
|              | 1.143499887       | 0.479678355006248 | low               |             |             |            |            |
| TCGA-DK-A1A7 | 1.53424657534247  | 0                 | 0.293680625       | 0.383707722 | 0.021487632 |            |            |
|              | 0.034143484       | 1.811767764       | 0.529259198       | 278955      | low         |            |            |
| TCGA-FD-A3SR | 1.64931506849315  | 1                 | 0.2754449         | 8.2445680   | 0.1074847   | 0          |            |
|              | 0.7510579         | 0.455183942161924 | low               |             |             |            |            |
| TCGA-GU-AATP | 2.74794520547945  | 0                 | 0.2027134         | 9.439460    | 0.1186547   | 0.06284677 |            |
|              | 1.2897250         | 4.491652565566    | low               |             |             |            |            |
| TCGA-DK-AA6X | 1.27945205479452  | 0                 | 0.5220974         | 7.1935310   | 0.6621355   | 0          |            |
|              | 0.9253447         | 0.270861304324913 | low               |             |             |            |            |
| TCGA-XF-A9T3 | 0.186301369863014 | 0                 | 1.7451440         | 0.2211019   | 0.06809939  | 0          |            |
|              | 1.7130590         | 0.622688176831978 | high              |             |             |            |            |
| TCGA-DK-A3WW | 1.73424657534247  | 0                 | 0.0885820         | 0.6312905   | 0.3370250   |            |            |
|              | 0.7970729         | 0.529717422723838 | low               |             |             |            |            |
| TCGA-UY-A9PA | 2.93698630136986  | 0                 | 0.06564991        | 3.8052790   | 0.2305625   |            |            |
|              | 0.06105998        | 0.5907269         | 0.538597731569975 | low         |             |            |            |
| TCGA-G2-AA3F | 2.44657534246575  | 0                 | 0.3181678         | 7.9901050   | 0.05320978  | 0          |            |
|              | 1.5615910         | 0.367817406075917 | low               |             |             |            |            |
| TCGA-FJ-A871 | 0.745205479452055 | 1                 | 0.1270220         | 0.08046562  | 0.1239171   | 0          |            |
|              | 1.1660520         | 0.593657697545079 | high              |             |             |            |            |
| TCGA-GC-A3RB | 1.59452054794521  | 0                 | 0.0690156         | 2.4920310   | 0.08079426  | 0          |            |
|              | 0.6304211         | 0.651119068726288 | high              |             |             |            |            |
| TCGA-YC-A89H | 1.56986301369863  | 0                 | 0.3775560         | 0.2242249   | 0.1381226   | 0          |            |
|              | 1.0294850         | 0.627982342415597 | high              |             |             |            |            |
| TCGA-E7-A3X6 | 2.47671232876712  | 1                 | 0.313302421       | 1.275879063 | 0.02619805  | 0          |            |
|              | 0.61020303        | 0.761246947620839 | high              |             |             |            |            |
| TCGA-DK-A6AW | 4.44109589041096  | 0                 | 0.2128533         | 5.3598020   | 0.09344258  | 0          |            |
|              | 1.9152830         | 0.35585788626034  | low               |             |             |            |            |

|              |                                   |                           |                   |                            |             |           |             |  |
|--------------|-----------------------------------|---------------------------|-------------------|----------------------------|-------------|-----------|-------------|--|
| TCGA-GC-A3BM | 1.78356164383562                  | 1                         | 0.04469052        | 2.4630090.2092708          |             |           |             |  |
|              | 0.04156597                        | 1.2795090.460901716042963 | low               |                            |             |           |             |  |
| TCGA-GV-A6ZA | 1.89315068493151                  | 0                         | 0.25201           | 2.7777830.2065138          | 0.1875125   |           |             |  |
|              | 1.5942060.432467850572748         | low                       |                   |                            |             |           |             |  |
| TCGA-UY-A8OD | 9.4027397260274                   | 0                         | 0.8751733         | 5.8212290.2241173          | 0.4069927   |           |             |  |
|              | 1.0887690.48975645391547          | low                       |                   |                            |             |           |             |  |
| TCGA-2F-A9KT | 6.44383561643836                  | 0                         | 0.6506223         | 2.2256350.03808309         |             |           |             |  |
|              | 0.1210268                         | 1.3128020.598784018681502 | high              |                            |             |           |             |  |
| TCGA-BT-A20Q | 1.62465753424658                  | 1                         | 0.2955651         | 0.5148933                  | 0.3171742   |           |             |  |
|              | 0.09163354                        | 0.5104159                 | 0.630786586647795 | high                       |             |           |             |  |
| TCGA-4Z-AA7Q | 1.3972602739726                   | 1                         | 0.246401069       | 0.643869459                | 0.144226759 |           |             |  |
|              | 0.057293469                       | 0.772643351               | 0.667042243911873 | high                       |             |           |             |  |
| TCGA-CF-A27C | 1.16438356164384                  | 0                         | 0.03812694        | 8.5500080.2231697          |             |           |             |  |
|              | 0.2482291.7361490.292343967910717 | low                       |                   |                            |             |           |             |  |
| TCGA-DK-AA77 | 1.69315068493151                  | 0                         | 0.2074157         | 4.1881580.2428146          | 0           |           |             |  |
|              | 0.5514230.529215453671437         | low                       |                   |                            |             |           |             |  |
| TCGA-ZF-AA5N | 0.46027397260274                  | 1                         | 0.3575789         | 0.3397773                  | 0           | 0         |             |  |
|              | 0.6500088                         | 0.814879385810466         | high              |                            |             |           |             |  |
| TCGA-XF-A9SZ | 2.35342465753425                  | 1                         | 0.4645447         | 1.60014                    | 0.1699459   | 0         |             |  |
|              | 0.6966727                         | 0.641459240376475         | high              |                            |             |           |             |  |
| TCGA-4Z-AA82 | 4.26301369863014                  | 1                         | 0.3082251         | 0.6345746                  | 0.09020722  |           |             |  |
|              | 0.04777925                        | 0.5602933                 | 0.762151418884154 | high                       |             |           |             |  |
| TCGA-DK-AA76 | 1.0027397260274                   | 0                         | 0.2885105         | 4.7153350.2701997          | 0           |           |             |  |
|              | 0.6922818                         | 0.480979336941529         | low               |                            |             |           |             |  |
| TCGA-DK-A3IL | 1.13150684931507                  | 1                         | 0.1423685         | 6.0425460.1666660.04413825 |             |           |             |  |
|              | 1.7210080.342581932723559         | low                       |                   |                            |             |           |             |  |
| TCGA-ZF-A9R1 | 2.11780821917808                  | 0                         | 0.05150933        | 3.3282610.1206005          |             |           |             |  |
|              | 0.04790804                        | 0.9410211                 | 0.541646506154689 | low                        |             |           |             |  |
| TCGA-C4-A0F0 | 0.161643835616438                 | 0                         | 0.32752934        | 0                          | 0           | 0         | 0.107169227 |  |
|              | 1.00137678785437                  | high                      |                   |                            |             |           |             |  |
| TCGA-FD-A3N5 | 1.87671232876712                  | 1                         | 0.3840633         | 0.03041194                 | 0.05620127  | 0         |             |  |
|              | 0.2967148                         | 0.890965287293286         | high              |                            |             |           |             |  |
| TCGA-BT-A2LA | 1.43013698630137                  | 0                         | 0.2893862         | 0.3971927                  | 0.2634915   | 0         |             |  |
|              | 2.6477740.307863355938074         | low                       |                   |                            |             |           |             |  |
| TCGA-BT-A2LB | 1.34794520547945                  | 1                         | 0.440135003       | 6.133944956                | 0.021468807 |           |             |  |
|              | 0.102340713                       | 1.120111688               | 0.510760543660896 | low                        |             |           |             |  |
| TCGA-XF-A8HB | 3.75342465753425                  | 0                         | 0.07658528        | 0.0363863                  | 0.2241396   | 0         |             |  |
|              | 0.3445624                         | 0.715898200852212         | high              |                            |             |           |             |  |
| TCGA-FD-A5BX | 0.473972602739726                 | 1                         | 0.6784212         | 0.1074412                  | 0           | 0         | 0.81702     |  |
|              | 0.808537716432847                 | high                      |                   |                            |             |           |             |  |
| TCGA-PQ-A6FI | 1.01917808219178                  | 0                         | 0.03467674        | 0                          | 0.0811898   | 0.0322523 |             |  |
|              | 0.6713287                         | 0.738005866484698         | high              |                            |             |           |             |  |
| TCGA-4Z-AA7S | 2.91506849315068                  | 1                         | 0.3436348         | 4.4314440.05746883         | 0           |           |             |  |
|              | 1.1779330.510686799243884         | low                       |                   |                            |             |           |             |  |

|              |                           |                           |                    |                    |             |                          |
|--------------|---------------------------|---------------------------|--------------------|--------------------|-------------|--------------------------|
| TCGA-4Z-AA86 | 0.852054794520548         | 1                         | 1.225670227        | 0.705849704        | 0.130441025 | 0                        |
|              | 0.891211974               | 0.716033844163389         | high               |                    |             |                          |
| TCGA-5N-A9KI | 0.208219178082192         | 1                         | 0.588706345        | 1.333950157        | 0           | 0                        |
|              | 0.703831766               | 0.778546143000379         | high               |                    |             |                          |
| TCGA-FD-A6TG | 0.254794520547945         | 1                         | 0.7193308          | 1.7467730.04678314 | 0           |                          |
|              | 0.5666281                 | 0.775008729211867         | high               |                    |             |                          |
| TCGA-GV-A3QI | 3.04109589041096          | 0                         | 0.2363602          | 1.7325770.7708044  | 0           |                          |
|              | 4.0878780.104095595245908 | low                       |                    |                    |             |                          |
| TCGA-DK-A6AV | 5.34794520547945          | 0                         | 0.2614097          | 8.4454560.0765059  | 0           |                          |
|              | 0.2851152                 | 0.545954362147736         | low                |                    |             |                          |
| TCGA-DK-A1A3 | 1.82191780821918          | 1                         | 0.7957413          | 0.4536759          | 0.03105159  | 0                        |
|              | 0.9836219                 | 0.735972833854692         | high               |                    |             |                          |
| TCGA-GC-A3RD | 1.17260273972603          | 0                         | 0.2809227          | 1.4236660.1370279  |             |                          |
|              | 0.04354699                | 1.1489910.56425178355351  | low                |                    |             |                          |
| TCGA-BT-A20R | 0.421917808219178         | 1                         | 1.1479240.3231931  | 0.0746576          |             |                          |
|              | 0.03954322                | 0.6607893                 | 0.838161273851625  | high               |             |                          |
| TCGA-XF-A9T0 | 2.18904109589041          | 0                         | 0.3458225          | 1.5334960.3036321  | 0           |                          |
|              | 2.1845170.329666960393473 | low                       |                    |                    |             |                          |
| TCGA-4Z-AA7Y | 4.16986301369863          | 0                         | 0.05125684         | 4.4321640.09000702 |             |                          |
|              | 0.04767321                | 0.4192874                 | 0.631447779722039  | high               |             |                          |
| TCGA-BL-A3JM | 0.561643835616438         | 1                         | 1.0906060.06095949 | 0.1126531          | 0           |                          |
|              | 1.0495630.702400709663092 | high                      |                    |                    |             |                          |
| TCGA-FJ-A3ZF | 1.43561643835616          | 0                         | 0.1833060.5515712  | 0.1788252          |             |                          |
|              | 0.02841502                | 1.6160910.474431989784243 | low                |                    |             |                          |
| TCGA-CF-A5UA | 1                         | 0                         | 0                  | 1.0348090.08314465 | 0           | 3.2147540.28082352150536 |
|              | low                       |                           |                    |                    |             |                          |
| TCGA-FD-A5C0 | 1.50684931506849          | 1                         | 0.2789463          | 3.5783010.05442552 | 0           |                          |
|              | 0.3929793                 | 0.702023106927056         | high               |                    |             |                          |
| TCGA-FD-A5BS | 4.49041095890411          | 0                         | 0.60815076         | 1.73362456         | 0.15255896  | 0                        |
|              | 0.66329983                | 0.666759341805199         | high               |                    |             |                          |
| TCGA-FD-A5BZ | 2.28767123287671          | 1                         | 0.4114713          | 1.6756580.2408479  |             |                          |
|              | 0.05467188                | 0.7693454                 | 0.585163146191091  | high               |             |                          |
| TCGA-UY-A9PE | 0.517808219178082         | 0                         | 0.4306632          | 3.2737860.1512489  | 0           |                          |
|              | 1.8084110.401523872801239 | low                       |                    |                    |             |                          |
| TCGA-GV-A40E | 0.715068493150685         | 1                         | 0.1701137          | 1.5760380.02489331 | 0           |                          |
|              | 0.8117384                 | 0.686631364201497         | high               |                    |             |                          |
| TCGA-BT-A2LD | 1.70684931506849          | 1                         | 0.1522144          | 0                  | 0           | 0.4565485                |
|              | 0.867121868119438         | high                      |                    |                    |             |                          |
| TCGA-G2-AA3B | 5.5013698630137           | 0                         | 0                  | 3.4562950.1860359  | 0           | 1.973983                 |
|              | 0.344270990725829         | low                       |                    |                    |             |                          |
| TCGA-CU-A5W6 | 0.153424657534247         | 1                         | 0.1463046          | 1.6219120.08563695 |             |                          |
|              | 0.3628684                 | 1.7419940.508201646369691 | low                |                    |             |                          |
| TCGA-DK-AA6R | 13.8109589041096          | 0                         | 0.2037009          | 0.5322899          | 0.2086577   | 0                        |
|              | 0.2221732                 | 0.749903780398246         | high               |                    |             |                          |

|                           |                   |                   |                            |                    |               |
|---------------------------|-------------------|-------------------|----------------------------|--------------------|---------------|
| TCGA-BL-A13I              | 0.610958904109589 | 1                 | 2.09453333333333           | 1.05985753333333   |               |
| 1.4731587                 | 9.8443550.5542824 | 2.8181417152013   | high                       |                    |               |
| TCGA-CF-A47T              | 1.05479452054795  | 1                 | 0.1004256                  | 4.0556080.1175649  | 0             |
| 2.1495760.339036743840254 | low               |                   |                            |                    |               |
| TCGA-DK-A3IS              | 4.18904109589041  | 0                 | 0.1038549                  | 2.0723780.1013163  | 0             |
| 1.1704860.54209989148118  | low               |                   |                            |                    |               |
| TCGA-XF-A9SJ              | 0.268493150684932 | 1                 | 0.6621481.8875520          | 0                  | 0.6388637     |
| 0.779660865372619         | high              |                   |                            |                    |               |
| TCGA-DK-AA6T              | 1.56712328767123  | 0                 | 0.1644315                  | 2.1353560.09624725 | 0             |
| 1.3600150.511572683033715 | low               |                   |                            |                    |               |
| TCGA-BT-A20N              | 2.17808219178082  | 1                 | 0.06021935                 | 2.803849412        | 0.035248393 0 |
| 0.426921525               | 0.718375494624064 | high              |                            |                    |               |
| TCGA-CF-A7I0              | 1.00821917808219  | 0                 | 0.5840422                  | 13.369650.03107812 | 0             |
| 1.6649                    | 0.278964553521669 | low               |                            |                    |               |
| TCGA-GC-A3YS              | 2.07671232876712  | 0                 | 0.1923035                  | 0.5938723          | 0.3376849 0   |
| 1.1798                    | 0.469357340613281 | low               |                            |                    |               |
| TCGA-XF-A9T2              | 1.57534246575342  | 1                 | 0.8752303                  | 0.1848129          | 0.2846119 0   |
| 1.1932490.545994467990134 | low               |                   |                            |                    |               |
| TCGA-UY-A78O              | 6.33424657534247  | 0                 | 0.1541814                  | 3.1742910.2105776  |               |
| 0.0956012                 | 1.63959           | 0.40061962555441  | low                        |                    |               |
| TCGA-GC-A3OO              | 1.31780821917808  | 0                 | 0.9694677                  | 1.7963480.02837309 | 0             |
| 0.5419084                 | 0.817962058074444 | high              |                            |                    |               |
| TCGA-XF-AAN5              | 6.28219178082192  | 0                 | 0.2057931                  | 0.5866441          | 0 0.09570253  |
| 1.2064460.664928895646788 | high              |                   |                            |                    |               |
| TCGA-FD-A3SN              | 2.43013698630137  | 0                 | 0.276871134                | 0.789262519        | 0.054020635 0 |
| 0.440385608               | 0.804035498371061 | high              |                            |                    |               |
| TCGA-E7-A4IJ              | 1.84657534246575  | 1                 | 0.1772954                  | 9.1534850.06918462 | 0             |
| 1.2085820.378373546854732 | low               |                   |                            |                    |               |
| TCGA-XF-AAN3              | 7.19178082191781  | 0                 | 0.1500121.1759870.1536623  | 0                  |               |
| 0.7413833                 | 0.632437049511428 | high              |                            |                    |               |
| TCGA-FD-A3B8              | 1.05205479452055  | 0                 | 4.0601420.7643235          | 0.2914620          |               |
| 0.5326528                 | 0.969871529024179 | high              |                            |                    |               |
| TCGA-XF-A9ST              | 0.350684931506849 | 1                 | 0.2327826                  | 0.2764923          | 0.06812771 0  |
| 0.5712572                 | 0.774667901680331 | high              |                            |                    |               |
| TCGA-DK-A6B5              | 4.22465753424658  | 0                 | 0.1123323                  | 2.5261790.1972555  |               |
| 0.03482618                | 1.09246           | 0.499580859040383 | low                        |                    |               |
| TCGA-GV-A3QK              | 2.27945205479452  | 0                 | 0.4026494                  | 13.391140.2946051  |               |
| 0.03120817                | 0.7593859         | 0.291849697424195 | low                        |                    |               |
| TCGA-XF-AAMR              | 7.64383561643836  | 0                 | 2.2394062.0039640.1908930  | 1.114531           |               |
| 0.655860600561125         | high              |                   |                            |                    |               |
| TCGA-DK-A3IQ              | 1.47671232876712  | 1                 | 1.4153332.0365220.04733953 | 0.03761085         |               |
| 0.6395246                 | 0.81521523401679  | high              |                            |                    |               |
| TCGA-E7-A4XJ              | 0.186301369863014 | 1                 | 0.2602329                  | 4.8837310          | 0 1.898124    |
| 0.405026908116262         | low               |                   |                            |                    |               |

|              |                   |                   |                   |             |             |             |  |
|--------------|-------------------|-------------------|-------------------|-------------|-------------|-------------|--|
| TCGA-4Z-AA7M | 1.35616438356164  | 0                 | 0.05858858        | 7.29301     | 0.3772323   |             |  |
|              | 0.05449235        | 1.59754           | 0.269782806342414 | low         |             |             |  |
| TCGA-C4-A0EZ | 0.747945205479452 | 1                 | 0.3445695         | 1.0231740   | 0.2016880   |             |  |
|              | 3.0535070         | 0.275861446478909 | low               |             |             |             |  |
| TCGA-FD-A62P | 0.523287671232877 | 1                 | 0.6332648         | 1.3128840   | 0           | 0.6906913   |  |
|              | 0.787233991517779 | high              |                   |             |             |             |  |
| TCGA-CF-A47V | 1.03835616438356  | 0                 | 0.2137792         | 11.578780   | 0.2252378   | 0           |  |
|              | 1.5388910         | 0.254260518317085 | low               |             |             |             |  |
| TCGA-XF-A9SI | 6.63835616438356  | 0                 | 0.9388348         | 1.8833140   | 0.1221181   | 0           |  |
|              | 0.9528623         | 0.640133744254448 | high              |             |             |             |  |
| TCGA-GU-A42Q | 0.942465753424658 | 1                 | 0.1180760         | 0.0747985   | 0.1382276   |             |  |
|              | 0.03660689        | 0.7941649         | 0.672954808454003 | high        |             |             |  |
| TCGA-KQ-A41N | 4.39452054794521  | 0                 | 0.1577661         | 0           | 0.1231277   | 0.04891195  |  |
|              | 1.6490320         | 0.511542483512615 | low               |             |             |             |  |
| TCGA-GD-A3OQ | 0.26027397260274  | 0                 | 0.2024366         | 0.6411952   | 0.1184929   | 0           |  |
|              | 0.7175811         | 0.683986217690773 | high              |             |             |             |  |
| TCGA-BT-A20U | 1.24657534246575  | 1                 | 0                 | 0.2747121   | 0.08461133  | 0           |  |
|              | 0.2956141         | 0.81697314923374  | high              |             |             |             |  |
| TCGA-XF-A9SW | 0.991780821917808 | 1                 | 4.12878601        | 0.84069437  | 0.34524515  | 0           |  |
|              | 0.83094719        | 0.83160624303636  | high              |             |             |             |  |
| TCGA-FD-A3B3 | 2.66849315068493  | 1                 | 0.9339805         | 0.3882741   | 0.0854203   | 0           |  |
|              | 0.6764651         | 0.793173849033195 | high              |             |             |             |  |
| TCGA-FT-A3EE | 0.271232876712329 | 1                 | 0.3094538         | 1.0291680   | 0.04528341  |             |  |
|              | 0.02398486        | 0.5554953         | 0.776303436291715 | high        |             |             |  |
| TCGA-ZF-A9RE | 0.29041095890411  | 1                 | 0.1696018         | 1.1281090   | 0.1323648   |             |  |
|              | 0.05258135        | 0.5241152         | 0.709966352775871 | high        |             |             |  |
| TCGA-DK-A6B1 | 5.61369863013699  | 0                 | 0.3637027         | 2.3500550   | 0.2341761   |             |  |
|              | 0.03382744        | 0.9421256         | 0.528388175812686 | low         |             |             |  |
| TCGA-GU-A767 | 0.394520547945205 | 1                 | 0.6712025         | 4.6011820   | 0.08418797  | 0           |  |
|              | 1.0981040         | 0.527148985484497 | low               |             |             |             |  |
| TCGA-4Z-AA81 | 3.47945205479452  | 1                 | 0                 | 3.79853776  | 0.033911583 | 0.053884931 |  |
|              | 0.458122323       | 0.6782012776746   | high              |             |             |             |  |
| TCGA-SY-A9G0 | 2.76164383561644  | 1                 | 2.3956994         | 0.9955050   | 0.1168569   | 0           |  |
|              | 1.2157470         | 0.588977818409157 | high              |             |             |             |  |
| TCGA-GV-A40G | 1.58904109589041  | 0                 | 0.2539045         | 6.4796680   | 0.1061563   |             |  |
|              | 0.0337361         | 1.17695           | 0.434552711202644 | low         |             |             |  |
| TCGA-FD-A43Y | 1.2986301369863   | 1                 | 0                 | 1.178669411 | 0.276594422 | 0.054937981 |  |
|              | 1.578392081       | 0.415709312957121 | low               |             |             |             |  |
| TCGA-BT-A42E | 3.03561643835616  | 0                 | 0.03815633        | 0.6526219   | 0.06700251  |             |  |
|              | 0.07097724        | 0.6970758         | 0.722984864467625 | high        |             |             |  |
| TCGA-FD-A43X | 0.301369863013699 | 0                 | 0.1168263         | 4.0333730   | 0.2279411   |             |  |
|              | 0.1086584         | 3.1748940         | 0.218619023376753 | low         |             |             |  |
| TCGA-ZF-AA4R | 2.83835616438356  | 1                 | 0                 | 1.395724531 | 0.074762288 | 0           |  |
|              | 0.835851666       | 0.641542053436944 | high              |             |             |             |  |

|              |                           |                           |                           |                    |             |                           |
|--------------|---------------------------|---------------------------|---------------------------|--------------------|-------------|---------------------------|
| TCGA-BT-A20T | 1.24109589041096          | 1                         | 0.4821607                 | 2.4435040.09407491 |             |                           |
|              | 0.1494834                 | 0.5916201                 | 0.712682779086665         | high               |             |                           |
| TCGA-XF-AAN8 | 0.323287671232877         | 1                         | 1.8288680.7965009         | 0                  | 0.07087508  |                           |
|              | 0.4155657                 | 1.04758324298903          | high                      |                    |             |                           |
| TCGA-KQ-A41P | 2.9972602739726           | 0                         | 0.295293874               | 3.507413712        | 0.086422674 | 0                         |
|              | 0.993055569               | 0.553955859378021         | low                       |                    |             |                           |
| TCGA-UY-A9PH | 4.27671232876712          | 0                         | 1.3979744.9228140.3850734 | 0                  |             |                           |
|              | 2.8925350.223517015478403 | low                       |                           |                    |             |                           |
| TCGA-FD-A5BY | 0.687671232876712         | 0                         | 0.42431828                | 0.3135955          | 0.0275964   | 0                         |
|              | 0.38566403                | 0.878680402205266         | high                      |                    |             |                           |
| TCGA-K4-A3WU | 0.287671232876712         | 0                         | 1.7522483.8103240.2958604 | 0.06268229         |             |                           |
|              | 2.1500420.356863741534973 | low                       |                           |                    |             |                           |
| TCGA-FD-A3SJ | 2.02465753424658          | 1                         | 0.8939428                 | 0.9101134          | 0.3924409   | 0                         |
|              | 0.6529074                 | 0.572292020504036         | low                       |                    |             |                           |
| TCGA-FD-A3B5 | 0.745205479452055         | 1                         | 0.2402263                 | 0.03260956         | 0.08034996  | 0                         |
|              | 0.87025                   | 0.698795605400625         | high                      |                    |             |                           |
| TCGA-GC-A6I3 | 0.003                     | 0                         | 0                         | 1.1695860          | 0           | 2.6849620.364505305119887 |
|              | low                       |                           |                           |                    |             |                           |
| TCGA-ZF-A9R0 | 1.86301369863014          | 1                         | 0.1846451                 | 7.4859870.07205262 |             |                           |
|              | 0.1144904                 | 1.4265080.394304663505043 | low                       |                    |             |                           |
| TCGA-K4-A83P | 1.35616438356164          | 0                         | 1.43042001                | 1.6475256          | 0.15223137  | 0                         |
|              | 1.26465498                | 0.598184241441121         | high                      |                    |             |                           |
| TCGA-FJ-A3ZE | 0.887671232876712         | 1                         | 0.04036162                | 11.428980.378      | 0           |                           |
|              | 1.4747280.221061439789339 | low                       |                           |                    |             |                           |
| TCGA-DK-A2I1 | 1.4958904109589           | 0                         | 0.9244188                 | 1.26031            | 0.1176289   | 0.1121462                 |
|              | 1.4356580.576332123139901 | low                       |                           |                    |             |                           |
| TCGA-DK-A6B0 | 6.38356164383562          | 0                         | 0                         | 3.4727310.22387    | 0.03952507  |                           |
|              | 1.9466960.337975579135924 | low                       |                           |                    |             |                           |
| TCGA-FD-A5BR | 2.22739726027397          | 0                         | 0.5475135                 | 5.4626920.3204779  |             |                           |
|              | 0.0509234                 | 0.6270220.469860125537579 | low                       |                    |             |                           |
| TCGA-LT-A5Z6 | 1.2986301369863           | 0                         | 0.1709399                 | 8.1756390.3335228  | 0.1059924   |                           |
|              | 1.3361630.302114875473059 | low                       |                           |                    |             |                           |
| TCGA-GC-A4ZW | 0.0410958904109589        | 0                         | 0                         | 0.7740573          | 0.03178795  | 0                         |
|              | 0.4738577                 | 0.786390905429094         | high                      |                    |             |                           |
| TCGA-DK-AA74 | 4.67945205479452          | 0                         | 0.6718609                 | 0.5586116          | 0           | 0                         |
|              | 1.2594780.674539148978428 | high                      |                           |                    |             |                           |
| TCGA-G2-A2EO | 4.94246575342466          | 1                         | 0.3389732                 | 0.9202797          | 0.02834461  | 0                         |
|              | 1.3336050.602213552328668 | high                      |                           |                    |             |                           |
| TCGA-UY-A78K | 1.46849315068493          | 1                         | 0.2599608                 | 2.1408320.1521637  | 0           |                           |
|              | 1.0396280.548128304748415 | low                       |                           |                    |             |                           |
| TCGA-CF-A3MG | 1.01095890410959          | 0                         | 0.1074166                 | 4.7972460          | 0           | 0.380762                  |
|              | 0.681769920586151         | high                      |                           |                    |             |                           |
| TCGA-DK-A1A6 | 5.53424657534247          | 0                         | 0.1837554.7143890.2366274 | 0.1025446          |             |                           |
|              | 1.2926990.407812574211814 | low                       |                           |                    |             |                           |
| TCGA-XF-AAMG | 9.21643835616438          | 0                         | 0.7591987                 | 0.9275183          | 0.1904504   | 0                         |

2.5137090.356283667864571 low

TCGA-XF-A8HE 10.4575342465753 0 0.286128536 1.042222161 0.16748057  
0.044353964 0.455110244 0.714485995259846 high

TCGA-K4-A4AC 0.761643835616438 1 0.1621284 0.3081142 0.06326612  
0.0502644 0.5894359 0.775364827025879 high

TCGA-FD-A3SL 1.95068493150685 1 1.3925640.2205395 0.0815114  
0.04317341 1.3163330.68498358043671 high

TCGA-2F-A9KO 2.01095890410959 1 0.2393212.1035120.7354334 0.1112944  
0.8972679 0.334174330001603 low

TCGA-DK-A3IM 0.679452054794521 1 0.03403159 0.09701212 0.09959911 0  
1.0485740.626115546606368 high

TCGA-4Z-AA7N 3.74520547945205 1 1.2210046.8720620.3848355 0.1747135  
0.6402543 0.454566601441347 low

TCGA-UY-A8OC 0.003 1 0.7375504 0.5005947 0 0 0.4740414  
0.899279650220717 high

TCGA-XF-A9T8 1.14520547945205 1 1.0353560.5988422 0.1317453 0  
0.7610131 0.736128711610721 high

TCGA-KQ-A41S 0.0958904109589041 0 1.452892997 2.384608517 0.103082024 0  
0.576234919 0.770470954885053 high

TCGA-E7-A7XN 1.17260273972603 0 0.2977497 0.2829267 0.6099899 0  
0.8389391 0.417214819130064 low

TCGA-DK-A2HX 3.89041095890411 1 0.9889884 0.7518024 0.09648131 0  
0.5483255 0.809995890185174 high

TCGA-CF-A8HY 0.945205479452055 0 0.05512337 0.05237913 0.06453109 0  
0.7966183 0.711683027073551 high

TCGA-4Z-AA7W 2.3013698630137 0 0 0.2824805 0 0 0.6160531  
0.792683900506312 high

TCGA-BT-A0S7 0.547945205479452 1 1.0268690.1393926 0 0 0.4799954  
0.947435455033982 high

TCGA-ZF-A9R3 2.6 1 0.3767636 14.439610.3920574 0.1946789 0.9245919  
0.245512663927465 low

TCGA-4Z-AA89 2.81917808219178 0 0.06009191 6.6236370.0351738 0  
1.2780540.432200543666718 low

TCGA-FD-A3NA 5.05479452054795 0 0.802372751 0.831739404 0.170783824  
0.033921575 0.477346093 0.758232299067108 high

TCGA-ZF-AA54 1.61643835616438 1 6.69562 0.8938753 0.2267288 0  
0.7845984 1.28644653929049 high

TCGA-DK-A1AB 1.39178082191781 1 0.2126145 0.8369807 0.03555725  
0.1412497 0.4058164 0.850075114610904 high

TCGA-UY-A9PB 2.46301369863014 0 0.4857915 0.5193080.1421750  
0.5795176 0.730542533065174 high

TCGA-XF-AAML 0.635616438356164 1 0.07075487 3.4960870.1242456 0  
0.5980764 0.597545382145561 high

TCGA-ZF-AA58 4.51780821917808 0 0.623073864 0.54976539 0.208403372 0

|              |                                   |                           |                            |                    |             |           |  |  |
|--------------|-----------------------------------|---------------------------|----------------------------|--------------------|-------------|-----------|--|--|
|              | 0.691711504                       | 0.66780272469167          | high                       |                    |             |           |  |  |
| TCGA-K4-A6FZ | 0.150684931506849                 | 0                         | 0.768963024                | 1.913689158        | 0.214333186 |           |  |  |
|              | 0.10217154                        | 0.339471816               | 0.728487411962227          | high               |             |           |  |  |
| TCGA-KQ-A41R | 3.6986301369863                   | 0                         | 0.2214161.8935390.08640146 | 0.06864523         |             |           |  |  |
|              | 2.2137020.396986967546678         | low                       |                            |                    |             |           |  |  |
| TCGA-DK-AA6M | 4.33424657534247                  | 0                         | 0.1419003                  | 0.7415978          | 0.1245884   | 0         |  |  |
|              | 0.8125332                         | 0.649246271026389         | high                       |                    |             |           |  |  |
| TCGA-HQ-A5ND | 0.750684931506849                 | 1                         | 0.049125709                | 0.186720225        | 0.143774574 |           |  |  |
|              | 0.091382144                       | 0.388459252               | 0.771679105347788          | high               |             |           |  |  |
| TCGA-UY-A78P | 6.52054794520548                  | 0                         | 0.5922352                  | 0.8441275          | 0.1155517   |           |  |  |
|              | 0.1377072                         | 0.2825992                 | 0.857669796464118          | high               |             |           |  |  |
| TCGA-ZF-A9RD | 1.11780821917808                  | 1                         | 0.3620451                  | 0.2580159          | 0.05297926  | 0         |  |  |
|              | 0.7897530.740123943210056         | high                      |                            |                    |             |           |  |  |
| TCGA-FD-A62S | 1.11232876712329                  | 1                         | 0.7028408                  | 0.7464216          | 0.07259932  |           |  |  |
|              | 0.07690606                        | 0.6425716                 | 0.790631544470491          | high               |             |           |  |  |
| TCGA-E5-A2PC | 3.63287671232877                  | 0                         | 0.1559728                  | 3.3494990.01825922 |             |           |  |  |
|              | 0.1160543                         | 1.0121960.600971892277555 | high                       |                    |             |           |  |  |
| TCGA-GD-A76B | 0.613698630136986                 | 0                         | 0.36465604                 | 0.6545041          | 0.11858074  | 0         |  |  |
|              | 0.90592742                        | 0.652087449375005         | high                       |                    |             |           |  |  |
| TCGA-XF-A9SK | 1.33150684931507                  | 1                         | 0.2954053                  | 4.7718820.1383284  |             |           |  |  |
|              | 0.1099008                         | 1.6270780.40408748974807  | low                        |                    |             |           |  |  |
| TCGA-DK-A1AD | 9.36986301369863                  | 0                         | 0.3593105                  | 2.7313820.1051582  | 0           |           |  |  |
|              | 0.4212860.699251462858791         | high                      |                            |                    |             |           |  |  |
| TCGA-FD-A3SQ | 3.8986301369863                   | 1                         | 1.53445                    | 1.8440160.2641661  | 0.08395109  |           |  |  |
|              | 1.1198340.577026364866409         | low                       |                            |                    |             |           |  |  |
| TCGA-XF-AAN1 | 2.57808219178082                  | 1                         | 0.1469384                  | 5.6547420.1720159  | 0           |           |  |  |
|              | 1.9231590.320745728963001         | low                       |                            |                    |             |           |  |  |
| TCGA-G2-A2EL | 2.24383561643836                  | 1                         | 0.2704639                  | 0.8352476          | 0.1978894   | 0         |  |  |
|              | 0.6729469                         | 0.6411324432114           | high                       |                    |             |           |  |  |
| TCGA-XF-AAMZ | 3.69315068493151                  | 1                         | 0.09048109                 | 3.5250420.0529616  | 0           |           |  |  |
|              | 1.6036510.450125097220473         | low                       |                            |                    |             |           |  |  |
| TCGA-UY-A8OB | 5.77808219178082                  | 0                         | 0                          | 0.3618930.03715435 | 0           | 0.7615488 |  |  |
|              | 0.722981553964644                 | high                      |                            |                    |             |           |  |  |
| TCGA-CU-A3KJ | 1.53972602739726                  | 0                         | 0.08238408                 | 0.4436020.2250367  | 0           |           |  |  |
|              | 1.14565                           | 0.527980901063932         | low                        |                    |             |           |  |  |
| TCGA-DK-AA6S | 13.8356164383562                  | 0                         | 0.4740423                  | 1.0698020.1387364  | 0           |           |  |  |
|              | 1.43799                           | 0.525024937296474         | low                        |                    |             |           |  |  |
| TCGA-E7-A8O8 | 0.0356164383561644                | 0                         | 0.2482925                  | 6.1814090.02906678 | 0           |           |  |  |
|              | 1.2998810.452057309101351         | low                       |                            |                    |             |           |  |  |
| TCGA-LT-A8JT | 1.75616438356164                  | 0                         | 0.08420597                 | 8.6014940.1971542  |             |           |  |  |
|              | 0.1174781.3087490.338202249199795 | low                       |                            |                    |             |           |  |  |
| TCGA-DK-A1AC | 10.9068493150685                  | 0                         | 0.1091241                  | 2.5922870.2129132  | 0           |           |  |  |
|              | 0.2578762                         | 0.651627150714644         | high                       |                    |             |           |  |  |
| TCGA-C4-A0F1 | 0.243835616438356                 | 0                         | 0.7586546                  | 0.08009846         | 0.02467032  | 0         |  |  |



|              |                           |                   |                            |                    |             |   |  |  |
|--------------|---------------------------|-------------------|----------------------------|--------------------|-------------|---|--|--|
|              | 0.4826803                 | 0.897668879277434 | high                       |                    |             |   |  |  |
| TCGA-4Z-AA83 | 5.54520547945206          | 0                 | 0.1324319                  | 6.8582240.2713088  | 0           |   |  |  |
|              | 1.6069090.304022565158099 | low               |                            |                    |             |   |  |  |
| TCGA-ZF-AA4V | 4.94794520547945          | 0                 | 0.1248848                  | 1.5822340.1949312  | 0           |   |  |  |
|              | 0.9194156                 | 0.556243291176431 | low                        |                    |             |   |  |  |
| TCGA-ZF-A9RM | 3.98630136986301          | 0                 | 0.09374483                 | 11.491050.08230796 |             |   |  |  |
|              | 0.04359532                | 0.7540636         | 0.386250054283651          | low                |             |   |  |  |
| TCGA-E7-A3Y1 | 0.446575342465753         | 0                 | 0.2457575                  | 12.189890.1150801  | 0           |   |  |  |
|              | 2.4660010.198450154663189 | low               |                            |                    |             |   |  |  |
| TCGA-FD-A6TC | 0.512328767123288         | 0                 | 0.3525501                  | 0.5862480.1031797  | 0           |   |  |  |
|              | 0.6128295                 | 0.735668178673947 | high                       |                    |             |   |  |  |
| TCGA-DK-A2I4 | 10.5068493150685          | 0                 | 1.0259791.4151810.07748899 | 0                  |             |   |  |  |
|              | 0.7309715                 | 0.749627755744176 | high                       |                    |             |   |  |  |
| TCGA-UY-A78M | 1.89041095890411          | 1                 | 0.1402134.8407890.05471424 | 0                  |             |   |  |  |
|              | 1.4910480.43772054054378  | low               |                            |                    |             |   |  |  |
| TCGA-4Z-AA7R | 1.43013698630137          | 1                 | 0.6877326                  | 3.8276130.2012764  | 0           |   |  |  |
|              | 1.9288250.366582349887397 | low               |                            |                    |             |   |  |  |
| TCGA-E7-A519 | 1.39178082191781          | 0                 | 0.1445825                  | 1.3738470          | 0.134474    |   |  |  |
|              | 2.6413690.385274456736236 | low               |                            |                    |             |   |  |  |
| TCGA-BL-A5ZZ | 1.03287671232877          | 0                 | 2.398470651                | 0.46425424         | 0.207985899 | 0 |  |  |
|              | 0.423884306               | 0.911756313109545 | high                       |                    |             |   |  |  |
| TCGA-FD-A62N | 0.224657534246575         | 0                 | 0.4623191                  | 0.4881147          | 0           | 0 |  |  |
|              | 0.3921895                 | 0.896259488580041 | high                       |                    |             |   |  |  |
| TCGA-DK-AA71 | 1.13698630136986          | 0                 | 0.1859                     | 0.9421079          | 0.07254231  | 0 |  |  |
|              | 1.0813760.618044415194885 | high              |                            |                    |             |   |  |  |
| TCGA-KQ-A41O | 4.21369863013699          | 0                 | 0.05421813                 | 15.816320.1586784  | 0           |   |  |  |
|              | 0.6504829                 | 0.288931034472181 | low                        |                    |             |   |  |  |
| TCGA-DK-A1A5 | 0.178082191780822         | 1                 | 0.6301206                  | 1.6386870.09706068 |             |   |  |  |
|              | 0.06169111                | 0.4792748         | 0.76900011591428           | high               |             |   |  |  |
| TCGA-XF-AAMT | 0.246575342465753         | 1                 | 0.7066927                  | 0.4740078          | 0.1703268   | 0 |  |  |
|              | 1.0314820.623819613539527 | high              |                            |                    |             |   |  |  |
| TCGA-XF-A9SU | 0.498630136986301         | 1                 | 0.9191511                  | 3.4311850.03842927 | 0           |   |  |  |
|              | 1.7185760.486580278003087 | low               |                            |                    |             |   |  |  |
| TCGA-FD-A6TK | 0.904109589041096         | 0                 | 0.9093543                  | 0.3142122          | 0.04838867  | 0 |  |  |
|              | 0.7438631                 | 0.804137112349486 | high                       |                    |             |   |  |  |
| TCGA-UY-A78L | 3.08767123287671          | 0                 | 0.280937855                | 0.953399183        | 0.023491756 | 0 |  |  |
|              | 0.251697384               | 0.877942358005164 | high                       |                    |             |   |  |  |
| TCGA-S5-A6DX | 0.153424657534247         | 1                 | 0.3742135                  | 0.5333757          | 0           | 0 |  |  |
|              | 2.7720080.38271853659473  | low               |                            |                    |             |   |  |  |
| TCGA-XF-A8HI | 1.49041095890411          | 1                 | 0.4159055                  | 5.6316030.1825825  | 0           |   |  |  |
|              | 1.5309710.376811539210453 | low               |                            |                    |             |   |  |  |
| TCGA-XF-A9T5 | 5.55342465753425          | 0                 | 0.5497581                  | 0.6268670.1608959  | 0           |   |  |  |
|              | 1.9037680.450746106935621 | low               |                            |                    |             |   |  |  |
| TCGA-H4-A2HQ | 1.61643835616438          | 0                 | 0                          | 5.4783180.1163670  | 0.9621964   |   |  |  |

0.471407740221611 low  
TCGA-XF-A9SP 1.24383561643836 1 1.5310071.6106580.03200533 0  
1.1927450.700137682460827 high  
TCGA-DK-A3IK 0.4 1 0.2618614 1.8839610.0437932 0.06958665 1.621844  
0.512714820835897 low
