# Supplementary material for: Ferroptosis‐Related Long Noncoding RNAs Have Excellent Predictive Ability for Multiomic Characteristics of Bladder Cancer
Source: Hindawi journal article supplement (doi:10.1155/2022/9316847), 2022-01-01
Supplement: f1 [file 9316847.f1.zip]

| id                        | futime                    | fustat            | AL136084.3                 | AL731567.1         | AC006160.1 | AC012568.1 | AC034236.2 |
|---------------------------|---------------------------|-------------------|----------------------------|--------------------|------------|------------|------------|
| TCGA-CF-A47X              | 1.05205479452055          | 0                 | 0.1634272                  | 4.1618040.3443737  |            |            |            |
| 0.03040022                | 1.8448590.304943347874197 | low               |                            |                    |            |            |            |
| TCGA-BL-A0C8              | 3.33972602739726          | 0                 | 1.87479915.6686446666667   | 1.045091           |            |            |            |
| 4.18296566666667          | 0.7392174                 | 0.422489915703895 | low                        |                    |            |            |            |
| TCGA-G2-A3IB              | 0.602739726027397         | 1                 | 0.03671464                 | 0.06977371         | 0.1289418  |            |            |
| 0.06829546                | 0.1501652                 | 0.850740684333934 | high                       |                    |            |            |            |
| TCGA-2F-A9KP              | 0.997260273972603         | 1                 | 0.8243399                  | 2.00177            | 0          | 0.08518955 |            |
| 0.9115811                 | 0.733241497242039         | high              |                            |                    |            |            |            |
| TCGA-FD-A43P              | 2.27945205479452          | 0                 | 0.4644774                  | 2.7839250.2091339  | 0          |            |            |
| 1.1593290.491643163410303 | low                       |                   |                            |                    |            |            |            |
| TCGA-CF-A47W              | 1.00821917808219          | 0                 | 0                          | 2.7828770.06949671 | 0.1104291  |            |            |
| 2.8705160.300307185218852 | low                       |                   |                            |                    |            |            |            |
| TCGA-GC-A3I6              | 1.72602739726027          | 1                 | 0.04440425                 | 0.9282603          | 0.3378867  |            |            |
| 0.1238991                 | 1.2592050.454217517071441 | low               |                            |                    |            |            |            |
| TCGA-FD-A6TA              | 5.23835616438356          | 0                 | 0.5686815                  | 2.5937780.1331473  |            |            |            |
| 0.1057844                 | 0.7443016                 | 0.644203189599722 | high                       |                    |            |            |            |
| TCGA-PQ-A6FN              | 1.38904109589041          | 0                 | 0.3351258                  | 0                  | 0.03269338 | 0          |            |
| 0.7919515                 | 0.76267139720969          | high              |                            |                    |            |            |            |
| TCGA-XF-AAMY              | 8.24931506849315          | 0                 | 1.20737215.373350.04711435 | 0.0748639          |            |            |            |
| 1.5802330.278418906243116 | low                       |                   |                            |                    |            |            |            |
| TCGA-K4-A3WS              | 2.08493150684932          | 0                 | 1.11641712.6378            | 0.4545920          | 1.29707    |            |            |
| 0.232366421445017         | low                       |                   |                            |                    |            |            |            |
| TCGA-ZF-A9RN              | 1.68493150684932          | 1                 | 0.2141667                  | 0.8140188          | 0.09401917 | 0          |            |
| 0.4525767                 | 0.762988178584598         | high              |                            |                    |            |            |            |
| TCGA-UY-A9PF              | 0.320547945205479         | 0                 | 0.4128858                  | 7.9250850.04833517 |            |            |            |
| 0.07680376                | 0.5178768                 | 0.552313125325991 | low                        |                    |            |            |            |
| TCGA-XF-AAMQ              | 5.96438356164384          | 0                 | 0.5717038                  | 4.1286420.1338549  | 0          |            |            |
| 0.8807611                 | 0.549581560981729         | low               |                            |                    |            |            |            |
| TCGA-CF-A1HR              | 1.06575342465753          | 0                 | 0.7825291                  | 1.31555            | 0.1409355  | 0          |            |
| 0.5416387                 | 0.73532904164239          | high              |                            |                    |            |            |            |
| TCGA-G2-A2EJ              | 4                         | 0                 | 0.1043501                  | 0.3305174          | 0.1832388  | 0.03235149 |            |
| 0.6544244                 | 0.665155090649587         | high              |                            |                    |            |            |            |
| TCGA-FD-A43N              | 1.91506849315068          | 0                 | 1.0865033.5102050.08479555 | 0                  |            |            |            |
| 1.0072760.606680057481719 | high                      |                   |                            |                    |            |            |            |
| TCGA-CU-A0YR              | 1.26027397260274          | 1                 | 1.5948690.2612881          | 0.06438139         |            |            |            |
| 0.1023009                 | 0.2849176                 | 1.03923160607369  | high                       |                    |            |            |            |
| TCGA-SY-A9G5              | 3.24931506849315          | 0                 | 0.2334165                  | 0.8871850.2049397  | 0          |            |            |
| 0.5250785                 | 0.665887372045942         | high              |                            |                    |            |            |            |
| TCGA-4Z-AA84              | 1.26027397260274          | 0                 | 0.3214093                  | 1.6288450.1567763  | 0          |            |            |
| 2.5999550.32631624944813  | low                       |                   |                            |                    |            |            |            |
| TCGA-FD-A5BT              | 0.898630136986301         | 1                 | 1.8084290.1610999          | 0                  | 0          | 0.6009726  |            |
| 0.995558624649893         | high                      |                   |                            |                    |            |            |            |

|              |                           |                           |                           |                    |             |          |
|--------------|---------------------------|---------------------------|---------------------------|--------------------|-------------|----------|
| TCGA-E7-A6MF | 2.05479452054795          | 0                         | 0                         | 1.4103550.05791858 | 0.04601582  |          |
|              | 1.3220540.555593675251966 | low                       |                           |                    |             |          |
| TCGA-FT-A61P | 0.923287671232877         | 0                         | 0.557654392               | 0.529892377        | 0.148369865 | 0        |
|              | 0.373228544               | 0.787090932838872         | high                      |                    |             |          |
| TCGA-DK-AA6U | 1.58356164383562          | 0                         | 0.2072617                 | 3.0723180.09705374 | 0           |          |
|              | 1.0963760.535661744224967 | low                       |                           |                    |             |          |
| TCGA-BT-A20O | 1.01369863013699          | 1                         | 0.906196342               | 0.645812003        | 0.331516828 | 0        |
|              | 0.679506543               | 0.611543347474527         | high                      |                    |             |          |
| TCGA-GD-A3OS | 1.74794520547945          | 0                         | 0.03128782                | 0.2973021          | 0.09156903  | 0        |
|              | 1.4588480.540071391062874 | low                       |                           |                    |             |          |
| TCGA-E7-A678 | 2.18630136986301          | 0                         | 0                         | 3.4798770.1128213  | 0           | 2.224892 |
|              | 0.33821336225344          | low                       |                           |                    |             |          |
| TCGA-XF-A9SH | 5.4 1                     | 0.2504942                 | 5.0778390.0977484         | 0                  | 1.297747    |          |
|              | 0.449269729873914         | low                       |                           |                    |             |          |
| TCGA-FD-A5BU | 1.61095890410959          | 0                         | 0.5896405                 | 0.5093510          | 0           | 1.008515 |
|              | 0.731622666555142         | high                      |                           |                    |             |          |
| TCGA-C4-A0F7 | 0.16986301369863          | 1                         | 0.8306518                 | 0.2721721          | 0.0502974   | 0        |
|              | 0.7419648                 | 0.797483229719269         | high                      |                    |             |          |
| TCGA-ZF-AA5H | 2.45753424657534          | 0                         | 0.3296938                 | 1.12781            | 0.0771923   | 0        |
|              | 0.6472646                 | 0.721896576871893         | high                      |                    |             |          |
| TCGA-DK-A3WX | 0.879452054794521         | 1                         | 0.9743899                 | 1.2479270.07439255 | 0           |          |
|              | 0.5544787                 | 0.802497176600151         | high                      |                    |             |          |
| TCGA-YF-AA3L | 0.997260273972603         | 0                         | 0.2083021                 | 0.8412115          | 0.335297    |          |
|              | 0.09686932                | 1.0223620.503714548777701 | low                       |                    |             |          |
| TCGA-4Z-AA87 | 3.98356164383562          | 0                         | 0.0419546                 | 7.2556040.3192466  | 0           |          |
|              | 0.7092673                 | 0.385140122759084         | low                       |                    |             |          |
| TCGA-DK-A2I6 | 7.27671232876712          | 0                         | 0.1212986                 | 0.4898548          | 0.03550007  | 0        |
|              | 0.4961189                 | 0.801084726831554         | high                      |                    |             |          |
| TCGA-ZF-AA4X | 5.6 0                     | 0.04795873                | 15.129630.1965029         | 0                  | 1.516926    |          |
|              | 0.212875353536435         | low                       |                           |                    |             |          |
| TCGA-BT-A20P | 1.49041095890411          | 1                         | 0.08240554                | 2.19248675         | 0.19293883  |          |
|              | 0.07664413                | 1.79756678                | 0.401390093561478         | low                |             |          |
| TCGA-BT-A20W | 0.695890410958904         | 1                         | 1.0049273.5649520.3529302 | 0.1246223          |             |          |
|              | 0.7855073                 | 0.513664897632209         | low                       |                    |             |          |
| TCGA-BL-A13J | 0.221917808219178         | 1                         | 0.39174482                | 14.7993753333333   |             |          |
|              | 0.472614706666667         | 11.8219883333333          | 0.4822664                 | 4.90284652098401   |             |          |
|              | high                      |                           |                           |                    |             |          |
| TCGA-CF-A8HX | 0.945205479452055         | 0                         | 0.04995679                | 11.060450.2924137  |             |          |
|              | 0.04646405                | 3.5416570.120023409766426 | low                       |                    |             |          |
| TCGA-FJ-A3Z7 | 2.58904109589041          | 0                         | 1.1765329.6623710.2705464 | 0                  |             |          |
|              | 0.9967901                 | 0.366613077096111         | low                       |                    |             |          |
| TCGA-E7-A7PW | 1.13972602739726          | 0                         | 0.1230111                 | 8.5327670.1800063  |             |          |
|              | 0.0572054                 | 2.0124930.266628978232219 | low                       |                    |             |          |
| TCGA-CF-A3MH | 1.09041095890411          | 0                         | 0.1151395                 | 4.0845430.08985995 | 0           |          |

|                           |                   |                   |                            |                    |             |           |
|---------------------------|-------------------|-------------------|----------------------------|--------------------|-------------|-----------|
| 0.3348818                 | 0.660134833454102 | high              |                            |                    |             |           |
| TCGA-DK-A6B2              | 1.30684931506849  | 0                 | 0.3971613                  | 1.1741             | 0.1291510   |           |
| 0.5896022                 | 0.703946908527415 | high              |                            |                    |             |           |
| TCGA-GU-AATO              | 0.887671232876712 | 1                 | 0.07412371                 | 1.1973710.04338708 | 0           |           |
| 0.6467639                 | 0.721212078499695 | high              |                            |                    |             |           |
| TCGA-4Z-AA7O              | 1.4027397260274   | 0                 | 0.6232784                  | 12.897880.08107236 | 0           |           |
| 0.6609160.389919270197883 |                   | low               |                            |                    |             |           |
| TCGA-GD-A6C6              | 0.183561643835616 | 0                 | 0                          | 0.5226101          | 0           | 1.244721  |
| 0.627010631525902         |                   | high              |                            |                    |             |           |
| TCGA-YF-AA3M              | 1.13698630136986  | 0                 | 0.2379443                  | 1.4319580.2785534  | 0           |           |
| 0.6920582                 | 0.567285408350302 | low               |                            |                    |             |           |
| TCGA-FD-A62O              | 0.591780821917808 | 1                 | 0.5738621                  | 0.7931538          | 0.06107284  | 0         |
| 0.7397021                 | 0.744401936265708 | high              |                            |                    |             |           |
| TCGA-CU-AOYO              | 0.408219178082192 | 1                 | 1.1916261.1815330          | 0.3373126          | 0.66397     |           |
| 0.931628848305914         |                   | high              |                            |                    |             |           |
| TCGA-K4-AAQO              | 0.983561643835616 | 0                 | 0.9917667                  | 2.1465620          | 0           | 0.8413248 |
| 0.744561705838062         |                   | high              |                            |                    |             |           |
| TCGA-XF-AAMJ              | 4.57534246575342  | 1                 | 2.31559492                 | 1.53355384         | 0.04107257  | 0         |
| 1.28192346                | 0.741645269926123 | high              |                            |                    |             |           |
| TCGA-GU-A763              | 2.73150684931507  | 0                 | 0                          | 1.8880290.2326052  | 0           | 1.607288  |
| 0.407652385609391         |                   | low               |                            |                    |             |           |
| TCGA-G2-A2EC              | 1.90684931506849  | 1                 | 1.4928064.14348            | 0.06898335         | 0.2192267   |           |
| 0.6319903                 | 0.753677277209956 | high              |                            |                    |             |           |
| TCGA-FD-A3B7              | 0.334246575342466 | 1                 | 3.3664750.3594247          | 0.1549839          | 0           |           |
| 0.2681621                 | 1.14544679462498  | high              |                            |                    |             |           |
| TCGA-CU-AOYN              | 1.07671232876712  | 1                 | 0.5784328                  | 0.7610349          | 0.07813292  | 0         |
| 0.5823572                 | 0.775518746058729 | high              |                            |                    |             |           |
| TCGA-UY-A9PD              | 1.48493150684931  | 0                 | 0.6899259                  | 4.0791580.3140952  | 0           |           |
| 1.2123460.416658577387681 |                   | low               |                            |                    |             |           |
| TCGA-K4-A54R              | 2.30684931506849  | 0                 | 0.4905859                  | 0.4078924          | 0.3230508   | 0         |
| 0.4681896                 | 0.640378692285211 | high              |                            |                    |             |           |
| TCGA-DK-A1AA              | 1.58356164383562  | 0                 | 0.1292788                  | 4.9444250.1135068  |             |           |
| 0.03006006                | 0.4670699         | 0.592903331606097 | high                       |                    |             |           |
| TCGA-BT-A3PH              | 0.389041095890411 | 1                 | 0.3060499                  | 4.0713910.01990458 |             |           |
| 0.03162804                | 0.4450713         | 0.701924622926615 | high                       |                    |             |           |
| TCGA-CF-A3MF              | 1.04931506849315  | 0                 | 0.04923692                 | 12.959650.02882001 | 0           |           |
| 2.0540970.233873463294738 |                   | low               |                            |                    |             |           |
| TCGA-YC-A8S6              | 0.802739726027397 | 0                 | 3.9053133.0361850.20781    | 0.06604131         |             |           |
| 0.8712531                 | 0.824074564998589 | high              |                            |                    |             |           |
| TCGA-C4-A0F6              | 1.91780821917808  | 0                 | 0.5357591.5272610.08959931 | 0                  |             |           |
| 0.9391232                 | 0.645317277858606 | high              |                            |                    |             |           |
| TCGA-FD-A3B6              | 2.75342465753425  | 1                 | 0.299657676                | 0.488125119        | 0.150342537 |           |
| 0.119445871               | 0.87544179        | 0.659316669867655 | high                       |                    |             |           |
| TCGA-E7-A6ME              | 2.0027397260274   | 0                 | 0.3452732                  | 3.7182890.1684166  | 0.1070445   |           |

|              |                           |                           |                           |                    |             |          |           |  |  |
|--------------|---------------------------|---------------------------|---------------------------|--------------------|-------------|----------|-----------|--|--|
|              | 2.05552                   | 0.3592334429712           | low                       |                    |             |          |           |  |  |
| TCGA-ZF-A9R2 | 1.75890410958904          | 0                         | 0.05813813                | 3.0384090.1020906  |             |          |           |  |  |
|              | 0.05407339                | 0.6658080.618846223075809 | high                      |                    |             |          |           |  |  |
| TCGA-ZF-AA4T | 1.64109589041096          | 1                         | 0.1711949                 | 6.50689            | 0.03340204  | 0        |           |  |  |
|              | 0.6068382                 | 0.559254314508975         | low                       |                    |             |          |           |  |  |
| TCGA-FD-A6TE | 1.03013698630137          | 0                         | 0                         | 4.8244550.4043353  | 0           | 1.582182 |           |  |  |
|              | 0.296009200812073         | low                       |                           |                    |             |          |           |  |  |
| TCGA-H4-A2HO | 0.126027397260274         | 0                         | 0.3992276                 | 5.7851280.05842031 | 0           |          |           |  |  |
|              | 0.9661122                 | 0.513968673327618         | low                       |                    |             |          |           |  |  |
| TCGA-FD-A6TB | 1.56712328767123          | 0                         | 1.3298912.6145190.2147392 | 0                  |             |          |           |  |  |
|              | 0.8127745                 | 0.618228189111424         | high                      |                    |             |          |           |  |  |
| TCGA-XF-AAMH | 0.942465753424658         | 1                         | 0.04736439                | 0.1350193          | 0           | 0        |           |  |  |
|              | 1.4077230.608124568122603 | high                      |                           |                    |             |          |           |  |  |
| TCGA-XF-A9SY | 1.75342465753425          | 0                         | 0.621499286               | 0.531502961        | 0.436541098 | 0        |           |  |  |
|              | 0.457554723               | 0.580139165352952         | low                       |                    |             |          |           |  |  |
| TCGA-CF-A9FF | 0.989041095890411         | 0                         | 0.3374108                 | 11.798570.2764969  |             |          |           |  |  |
|              | 0.06276414                | 1.76644                   | 0.227358133627294         | low                |             |          |           |  |  |
| TCGA-GC-A3RC | 1.32602739726027          | 0                         | 0.2743825                 | 0.1303614          | 0.1070701   | 0        |           |  |  |
|              | 0.1496322                 | 0.87620462069355          | high                      |                    |             |          |           |  |  |
| TCGA-GU-A764 | 1.67123287671233          | 0                         | 0.9072538                 | 0.7389322          | 0.0758637   | 0        |           |  |  |
|              | 0.8599457                 | 0.733987079963274         | high                      |                    |             |          |           |  |  |
| TCGA-GU-A42R | 1.58082191780822          | 1                         | 0.1339928                 | 9.5916040.3137218  |             |          |           |  |  |
|              | 0.4569571                 | 1.8633320.257634598421811 | low                       |                    |             |          |           |  |  |
| TCGA-DK-A6B6 | 3.05479452054795          | 0                         | 0                         | 7.1720260.1795922  | 0           | 1.355308 |           |  |  |
|              | 0.351706213846733         | low                       |                           |                    |             |          |           |  |  |
| TCGA-R3-A69X | 1.18630136986301          | 0                         | 1.3298851.5490260.1255526 | 0                  |             |          |           |  |  |
|              | 0.6316623                 | 0.762300231809235         | high                      |                    |             |          |           |  |  |
| TCGA-5N-A9KM | 1.45205479452055          | 1                         | 0.1012808                 | 0.2405967          | 0.2074906   |          |           |  |  |
|              | 0.04709987                | 0.8284896                 | 0.615962528828036         | high               |             |          |           |  |  |
| TCGA-FD-A6TF | 0.189041095890411         | 1                         | 1.1769991.9054290.1275809 | 0                  |             |          |           |  |  |
|              | 0.8677087                 | 0.674201411419768         | high                      |                    |             |          |           |  |  |
| TCGA-XF-A8HF | 8.09315068493151          | 1                         | 0.1477172                 | 3.5090820.1152851  | 0           |          |           |  |  |
|              | 0.8592675                 | 0.554541897073125         | low                       |                    |             |          |           |  |  |
| TCGA-ZF-AA4U | 0.717808219178082         | 1                         | 0                         | 0.7684765          | 0           | 0        | 0.8526748 |  |  |
|              | 0.710227248371722         | high                      |                           |                    |             |          |           |  |  |
| TCGA-XF-A9T6 | 0.175342465753425         | 0                         | 0.1089876                 | 1.9158930.06379405 | 0           |          |           |  |  |
|              | 1.2778620.546555015078812 | low                       |                           |                    |             |          |           |  |  |
| TCGA-ZF-AA56 | 0.70958904109589          | 1                         | 1.218420176               | 1.603056315        | 0.109720299 |          |           |  |  |
|              | 0.043585924               | 0.293893658               | 0.867450199877218         | high               |             |          |           |  |  |
| TCGA-XF-A8HH | 0.156164383561644         | 1                         | 1.4732846.4293470.1596967 | 0                  |             |          |           |  |  |
|              | 1.8003070.380734756720067 | low                       |                           |                    |             |          |           |  |  |
| TCGA-BT-A42F | 2.36712328767123          | 0                         | 0.212560756               | 0.363561709        | 0.174186455 | 0        |           |  |  |
|              | 0.463672905               | 0.719835131431323         | high                      |                    |             |          |           |  |  |
| TCGA-ZF-A9RF | 5.33972602739726          | 0                         | 0.04857409                | 0.8308063          | 0.2558883   | 0        |           |  |  |

|              |                           |                           |                            |                    |             |   |  |  |
|--------------|---------------------------|---------------------------|----------------------------|--------------------|-------------|---|--|--|
|              | 0.9801106                 | 0.529475818413498         | low                        |                    |             |   |  |  |
| TCGA-ZF-A9RC | 7.85753424657534          | 0                         | 0.5073308                  | 11.630040.1855985  | 0           |   |  |  |
|              | 1.2450090.302780552200875 | low                       |                            |                    |             |   |  |  |
| TCGA-E7-A6MD | 0.353424657534247         | 0                         | 1.4313174.1305560.4964727  | 0.09861084         |             |   |  |  |
|              | 2.7174940.229033145054197 | low                       |                            |                    |             |   |  |  |
| TCGA-E5-A4TZ | 1.27945205479452          | 1                         | 0.1058505                  | 1.0728630.08261042 |             |   |  |  |
|              | 0.1640832                 | 0.9043532                 | 0.667630557422683          | high               |             |   |  |  |
| TCGA-ZF-A9R4 | 2.52328767123288          | 0                         | 0.2231192                  | 3.9858170.1044793  |             |   |  |  |
|              | 0.04150395                | 0.8395657                 | 0.560680382482718          | low                |             |   |  |  |
| TCGA-GV-A3QH | 0.706849315068493         | 1                         | 0.03383643                 | 4.1154470.2376671  |             |   |  |  |
|              | 0.1258830.4244055         | 0.564643171031619         | low                        |                    |             |   |  |  |
| TCGA-BT-A0YX | 1.0958904109589           | 1                         | 0.1931212                  | 0.7799047          | 0.05652015  |   |  |  |
|              | 0.04490478                | 0.4081036                 | 0.812733082410719          | high               |             |   |  |  |
| TCGA-ZF-A9RL | 7.40547945205479          | 0                         | 0.2322183                  | 4.4683170.1699064  | 0           |   |  |  |
|              | 0.9814469                 | 0.482622231202275         | low                        |                    |             |   |  |  |
| TCGA-ZF-A9R9 | 2.36712328767123          | 1                         | 0.8674713.2971410.04231331 | 0                  |             |   |  |  |
|              | 0.4927792                 | 0.7472045644361           | high                       |                    |             |   |  |  |
| TCGA-CF-A5U8 | 1.09315068493151          | 0                         | 0.05138168                 | 12.645340.1503770  |             |   |  |  |
|              | 2.5218510.179137105808068 | low                       |                            |                    |             |   |  |  |
| TCGA-XF-AAMW | 0.693150684931507         | 1                         | 1.033124854                | 1.208236593        | 0.093034218 | 0 |  |  |
|              | 0.541736516               | 0.798785678673166         | high                       |                    |             |   |  |  |
| TCGA-BT-A3PJ | 2.16164383561644          | 0                         | 0.27979411                 | 0.199398724        | 0.286602433 | 0 |  |  |
|              | 0.438677193               | 0.661456153791696         | high                       |                    |             |   |  |  |
| TCGA-ZF-A9R7 | 1.82191780821918          | 0                         | 0.1482325                  | 2.6762060.8242713  |             |   |  |  |
|              | 0.06893438                | 2.3038640.177035599736738 | low                        |                    |             |   |  |  |
| TCGA-FD-A3SO | 0.46027397260274          | 1                         | 0.843170521                | 0.40059725         | 0.137093281 | 0 |  |  |
|              | 0.702496627               | 0.73850588094118          | high                       |                    |             |   |  |  |
| TCGA-E7-A97P | 1.1972602739726           | 1                         | 1.106710151                | 0.09560129         | 0.235561579 | 0 |  |  |
|              | 0.397784498               | 0.783178119677522         | high                       |                    |             |   |  |  |
| TCGA-2F-A9KQ | 7.90684931506849          | 0                         | 0.6155728                  | 17.502830.02771656 | 0           |   |  |  |
|              | 1.2265870.261622251543173 | low                       |                            |                    |             |   |  |  |
| TCGA-S5-AA26 | 1.37808219178082          | 0                         | 0.1366005                  | 5.2569010.1599136  | 0.12705     |   |  |  |
|              | 2.7004050.26019051998653  | low                       |                            |                    |             |   |  |  |
| TCGA-E7-A7DU | 0.0767123287671233        | 0                         | 0.1665694                  | 5.3022790.09749862 | 0           |   |  |  |
|              | 1.4079770.422751931278718 | low                       |                            |                    |             |   |  |  |
| TCGA-DK-A3WY | 13.6082191780822          | 0                         | 0.5481172                  | 4.9478850.2673594  | 0           |   |  |  |
|              | 1.8931040.321857351277502 | low                       |                            |                    |             |   |  |  |
| TCGA-G2-A2EF | 5.16164383561644          | 0                         | 0.1453262                  | 0.3590374          | 1.003758    |   |  |  |
|              | 0.02703313                | 0.2932339                 | 0.338194859469244          | low                |             |   |  |  |
| TCGA-BT-A20V | 0.421917808219178         | 1                         | 0.06854207                 | 0.6512980.1203599  | 0           |   |  |  |
|              | 0.4485461                 | 0.738257606739779         | high                       |                    |             |   |  |  |
| TCGA-K4-A3WV | 1.76986301369863          | 0                         | 0                          | 0.1408407          | 0.2313544   | 0 |  |  |
|              | 0.7409447                 | 0.609136051230414         | high                       |                    |             |   |  |  |
| TCGA-GU-AATQ | 0.583561643835616         | 1                         | 0.2862256                  | 0.4532937          | 0.3909205   | 0 |  |  |

|              |                           |                   |                           |                    |                    |            |  |  |
|--------------|---------------------------|-------------------|---------------------------|--------------------|--------------------|------------|--|--|
|              | 0.2081209                 | 0.639135747028854 | high                      |                    |                    |            |  |  |
| TCGA-G2-A3VY | 1.46849315068493          | 0                 | 0.03635777                | 3.8348             | 0.2340955          |            |  |  |
|              | 0.06763161                | 0.6146495         | 0.530397774965411         | low                |                    |            |  |  |
| TCGA-CU-A3QU | 0.432876712328767         | 0                 | 0.03698215                | 4.67376            | 0.06494066         |            |  |  |
|              | 0.03439654                | 0.3226865         | 0.657468022039173         | high               |                    |            |  |  |
| TCGA-GD-A3OP | 0.175342465753425         | 0                 | 0.6994113                 | 2.2469540.1364629  | 0                  |            |  |  |
|              | 1.2895560.534112719688837 | low               |                           |                    |                    |            |  |  |
| TCGA-4Z-AA80 | 0.0520547945205479        | 1                 | 0.1766703                 | 0.2238333          | 0.2757626          | 0          |  |  |
|              | 0.6262467                 | 0.617324465034347 | high                      |                    |                    |            |  |  |
| TCGA-G2-A3IE | 1.67671232876712          | 1                 | 0.1665933                 | 10.803960.1218908  |                    |            |  |  |
|              | 0.07747296                | 0.5451017         | 0.422399131146494         | low                |                    |            |  |  |
| TCGA-FD-A43S | 1.24657534246575          | 0                 | 1.24348                   | 1.13613            | 0.08398271         | 0.04448237 |  |  |
|              | 1.9561190.509921128099847 | low               |                           |                    |                    |            |  |  |
| TCGA-XF-A8HG | 1.27945205479452          | 1                 | 0                         | 9.0183180.2496757  | 0.1487739          |            |  |  |
|              | 0.6106199                 | 0.40061023268362  | low                       |                    |                    |            |  |  |
| TCGA-GD-A2C5 | 2.22465753424658          | 0                 | 1.1403426.9658190.1668701 | 0                  |                    |            |  |  |
|              | 1.0771780.45515565618374  | low               |                           |                    |                    |            |  |  |
| TCGA-XF-AAMX | 0.564383561643836         | 1                 | 1.48558                   | 3.33143            | 0.2086943          | 0          |  |  |
|              | 0.4536834                 | 0.691382104550717 | high                      |                    |                    |            |  |  |
| TCGA-DK-A1AE | 1.34520547945205          | 0                 | 0.2743487                 | 0.1042763          | 0.1445269          |            |  |  |
|              | 0.05103351                | 0.5460902         | 0.745112454603334         | high               |                    |            |  |  |
| TCGA-KQ-A41Q | 0.989041095890411         | 0                 | 0.05190536                | 11.146620.06076388 |                    |            |  |  |
|              | 0.04827638                | 0.7076538         | 0.407060314018876         | low                |                    |            |  |  |
| TCGA-DK-A1AF | 1.46849315068493          | 0                 | 3.5709262.0545690.1150559 | 0.06094061         |                    |            |  |  |
|              | 0.5717062                 | 1.01551731956036  | high                      |                    |                    |            |  |  |
| TCGA-K4-A4AB | 0.208219178082192         | 0                 | 0.5468671                 | 0.1417206          | 0.2036997          | 0          |  |  |
|              | 0.6777941                 | 0.68312741066513  | high                      |                    |                    |            |  |  |
| TCGA-DK-A1AG | 1.3013698630137           | 0                 | 0.081730177               | 4.931496254        | 0.095678793        | 0          |  |  |
|              | 2.039117143               | 0.342561846269707 | low                       |                    |                    |            |  |  |
| TCGA-GV-A3JZ | 1.65205479452055          | 0                 | 0.5898803                 | 1.4635640.01918203 |                    |            |  |  |
|              | 0.03047993                | 0.6433726         | 0.781054280728537         | high               |                    |            |  |  |
| TCGA-XF-A9SV | 1.06301369863014          | 1                 | 0.2886571                 | 0.1828578          | 0                  | 0          |  |  |
|              | 0.6821392                 | 0.805981879841308 | high                      |                    |                    |            |  |  |
| TCGA-FD-A6TH | 0.358904109589041         | 1                 | 0.6634293                 | 1.5009560.01849178 | 0                  |            |  |  |
|              | 0.3014964                 | 0.880724160147312 | high                      |                    |                    |            |  |  |
| TCGA-DK-AA6W | 1.13698630136986          | 1                 | 0.6871186                 | 1.1970040.4021934  | 0                  |            |  |  |
|              | 1.0148510.479277004739433 | low               |                           |                    |                    |            |  |  |
| TCGA-DK-A3X1 | 5.5041095890411           | 0                 | 0.1914294                 | 2.0918430.1400625  | 0                  |            |  |  |
|              | 1.2788320.507073618814003 | low               |                           |                    |                    |            |  |  |
| TCGA-E7-A541 | 2.13150684931507          | 1                 | 0.1640528                 | 6.0795420.3520938  | 0                  |            |  |  |
|              | 0.9542916                 | 0.370128963589957 | low                       |                    |                    |            |  |  |
| TCGA-DK-AA6Q | 1.13150684931507          | 1                 | 0.059338519               | 0.620228804        | 0.104198439        | 0          |  |  |
|              | 0.695734919               | 0.687953166660672 | high                      |                    |                    |            |  |  |
| TCGA-UY-A78N | 7.23561643835616          | 1                 | 0.07899331                | 2.02664            | 0.1618310.03673524 |            |  |  |

|              |                           |                           |                           |                            |             |   |          |  |
|--------------|---------------------------|---------------------------|---------------------------|----------------------------|-------------|---|----------|--|
|              | 1.3785070.478949574334953 | low                       |                           |                            |             |   |          |  |
| TCGA-DK-AA75 | 0.931506849315068         | 1                         | 0.6121971                 | 2.07757                    | 0.2047653   | 0 |          |  |
|              | 1.2161920.511941852304286 | low                       |                           |                            |             |   |          |  |
| TCGA-ZF-AA5P | 1.01917808219178          | 0                         | 3.4438130.6041294         | 0.06202395                 | 0           |   |          |  |
|              | 1.1557260.914321688565968 | high                      |                           |                            |             |   |          |  |
| TCGA-GC-A3WC | 1.47945205479452          | 0                         | 0.1945023                 | 0.8316868                  | 0.4838569   | 0 |          |  |
|              | 1.7103820.333059143051597 | low                       |                           |                            |             |   |          |  |
| TCGA-K4-A5RH | 0.756164383561644         | 0                         | 0.6064176                 | 0.5762280.2662173          | 0           |   |          |  |
|              | 0.9025484                 | 0.583802678139559         | low                       |                            |             |   |          |  |
| TCGA-FD-A5C1 | 4.90958904109589          | 0                         | 0.1963170.6529029         | 0.02872773                 |             |   |          |  |
|              | 0.09129574                | 0.7092715                 | 0.765609109985741         | high                       |             |   |          |  |
| TCGA-XF-AAN7 | 1.54794520547945          | 1                         | 0.3885729                 | 0                          | 0           | 0 | 1.324406 |  |
|              | 0.657095040411403         | high                      |                           |                            |             |   |          |  |
| TCGA-FD-A3SS | 1.07123287671233          | 1                         | 0.3839693                 | 0.6302022                  | 0.2451818   | 0 |          |  |
|              | 0.7328805                 | 0.614277805479199         | high                      |                            |             |   |          |  |
| TCGA-HQ-A2OE | 3.21643835616438          | 0                         | 0.3599777                 | 2.7120220.1053535          |             |   |          |  |
|              | 0.02391499                | 0.2594108                 | 0.745450794088147         | high                       |             |   |          |  |
| TCGA-GV-A3JV | 1.18904109589041          | 1                         | 0.1451146                 | 5.7913930.08494042         | 0           |   |          |  |
|              | 0.7122334                 | 0.531036684370399         | low                       |                            |             |   |          |  |
| TCGA-CU-A3YL | 2.48219178082192          | 0                         | 0.09337902                | 1.2865890.2186314          | 0           |   |          |  |
|              | 2.8771760.276159695733328 | low                       |                           |                            |             |   |          |  |
| TCGA-FD-A43U | 1.74246575342466          | 0                         | 0.3910596                 | 1.1147740.2575128          |             |   |          |  |
|              | 0.09092965                | 1.3728680.483163847683273 | low                       |                            |             |   |          |  |
| TCGA-GU-A42P | 0.90958904109589          | 1                         | 0.1348575                 | 2.6269480.4144171          |             |   |          |  |
|              | 0.03135723                | 1.1031510.400660684851423 | low                       |                            |             |   |          |  |
| TCGA-XF-A9SL | 5.53424657534247          | 1                         | 1.9557420.8313797         | 0.09037586                 | 0           |   |          |  |
|              | 1.75419                   | 0.595578393441225         | high                      |                            |             |   |          |  |
| TCGA-XF-AAN2 | 5.12054794520548          | 1                         | 0.2355634                 | 1.1937930.5055714          |             |   |          |  |
|              | 0.0730313                 | 0.9634689                 | 0.425629201727032         | low                        |             |   |          |  |
| TCGA-GU-A766 | 1.31506849315068          | 0                         | 1.3441120.8651979         | 0.4060662                  |             |   |          |  |
|              | 0.04032702                | 1.1113230.51350016399905  | low                       |                            |             |   |          |  |
| TCGA-FD-A6TD | 1.05753424657534          | 1                         | 0.4876876                 | 1.7609530.1427299          |             |   |          |  |
|              | 0.04535908                | 0.5452105                 | 0.698708666368553         | high                       |             |   |          |  |
| TCGA-FD-A3B4 | 1.3972602739726           | 1                         | 0.226012233               | 0.245440619                | 0.170090349 | 0 |          |  |
|              | 0.607465533               | 0.692609947725306         | high                      |                            |             |   |          |  |
| TCGA-BT-A20X | 0.687671232876712         | 1                         | 1.7076210.2318014         | 0.04079705                 | 0           |   |          |  |
|              | 1.14029                   | 0.778570324836112         | high                      |                            |             |   |          |  |
| TCGA-GV-A3JW | 1.77808219178082          | 0                         | 0.4503216                 | 2.9240040.3514510.03490311 |             |   |          |  |
|              | 1.8520760.334818211120196 | low                       |                           |                            |             |   |          |  |
| TCGA-FD-A6TI | 0.805479452054795         | 1                         | 0.4575304                 | 0.4347529                  | 0.0824024   |   |          |  |
|              | 0.16367                   | 1.3243240.621902299626516 | high                      |                            |             |   |          |  |
| TCGA-FD-A3SP | 2.14520547945205          | 0                         | 1.0067521.3950880.1473213 | 0                          |             |   |          |  |
|              | 0.5833375                 | 0.736419485634181         | high                      |                            |             |   |          |  |
| TCGA-E7-A97Q | 0.673972602739726         | 1                         | 0.7022613                 | 2.1448940.4991406          |             |   |          |  |

|                           |                           |                   |                           |                            |             |            |           |
|---------------------------|---------------------------|-------------------|---------------------------|----------------------------|-------------|------------|-----------|
| 0.04665447                | 1.1078840.405935329920668 | low               |                           |                            |             |            |           |
| TCGA-YC-A9TC              | 0.0547945205479452        | 1                 | 0.08968993                | 8.3946480.3937388          | 0           |            |           |
| 1.3695260.268144931307371 | low                       |                   |                           |                            |             |            |           |
| TCGA-ZF-AA52              | 2.95068493150685          | 1                 | 0.4905604                 | 1.9810890                  | 0           | 1.103532   |           |
| 0.645260417469705         | high                      |                   |                           |                            |             |            |           |
| TCGA-K4-A5RJ              | 1.47671232876712          | 0                 | 0.746258767               | 1.418214714                | 0.691616042 | 0          |           |
| 1.390467034               | 0.314462084452864         | low               |                           |                            |             |            |           |
| TCGA-BT-A3PK              | 0.83013698630137          | 1                 | 1.6843510.2353674         | 0.08699179                 | 0           |            |           |
| 0.4525194                 | 0.945107375442638         | high              |                           |                            |             |            |           |
| TCGA-FD-A3N6              | 2.33150684931507          | 0                 | 0                         | 0.06187816                 | 0.1334093   | 0.03028359 |           |
| 1.2695780.563419245146901 | low                       |                   |                           |                            |             |            |           |
| TCGA-CF-A9FL              | 1.54794520547945          | 1                 | 0.5145605                 | 7.8719970.1204758          | 0           |            |           |
| 1.2627510.39412412692667  | low                       |                   |                           |                            |             |            |           |
| TCGA-CF-A9FM              | 1.09041095890411          | 0                 | 0.2114077.0811060.1237436 | 0.1474698                  |             |            |           |
| 2.3922480.275876891368207 | low                       |                   |                           |                            |             |            |           |
| TCGA-G2-AA3D              | 5.86027397260274          | 0                 | 0.05325702                | 9.4632660.1246924          |             |            |           |
| 0.09906709                | 1.0600790.375014839037211 | low               |                           |                            |             |            |           |
| TCGA-DK-A2I2              | 0.649315068493151         | 1                 | 0.4017016                 | 0.9754644                  | 0.05225097  | 0          |           |
| 0.8397477                 | 0.703106347851577         | high              |                           |                            |             |            |           |
| TCGA-MV-A51V              | 1.12328767123288          | 0                 | 0.05661127                | 12.049620.1656823          |             |            |           |
| 0.2106131                 | 0.5248322                 | 0.388614652385996 | low                       |                            |             |            |           |
| TCGA-DK-A3X2              | 1.4986301369863           | 1                 | 0.08493605                | 0.6053072                  | 0.0497159   |            |           |
| 0.03949886                | 0.4284523                 | 0.808486617742408 | high                      |                            |             |            |           |
| TCGA-GC-A6I1              | 0.003                     | 0                 | 0.05162584                | 0.1962229                  | 0.09065498  | 0          | 0.6475355 |
| 0.725026958922457         | high                      |                   |                           |                            |             |            |           |
| TCGA-K4-A5RI              | 0.975342465753425         | 1                 | 0.3191140.8230457         | 0.08005202                 | 0           |            |           |
| 0.6090915                 | 0.740914397681467         | high              |                           |                            |             |            |           |
| TCGA-GV-A3QF              | 1.69041095890411          | 1                 | 0.3789178                 | 3.1504720.3604140.08810643 |             |            |           |
| 0.8007287                 | 0.476999236182209         | low               |                           |                            |             |            |           |
| TCGA-E7-A7DV              | 0.101369863013699         | 0                 | 0.5560032                 | 0.9509820.04339296         | 0           |            |           |
| 0.6468515                 | 0.774242634536955         | high              |                           |                            |             |            |           |
| TCGA-DK-AA6P              | 1.25205479452055          | 0                 | 0.3671676                 | 0.9885180.07163848         | 0           |            |           |
| 0.4838935                 | 0.778162060168524         | high              |                           |                            |             |            |           |
| TCGA-CF-A47Y              | 1.02191780821918          | 0                 | 0                         | 8.78335                    | 0.04830842  | 0          | 4.219486  |
| 0.133655044495265         | low                       |                   |                           |                            |             |            |           |
| TCGA-CF-A3MI              | 1.01369863013699          | 0                 | 0.3958001                 | 5.9757430.07722499         |             |            |           |
| 0.08180613                | 1.1751630.473396413346554 | low               |                           |                            |             |            |           |
| TCGA-DK-AA6L              | 3.18630136986301          | 1                 | 0.06075884                | 1.5588190.07112835         |             |            |           |
| 0.1130217                 | 0.8449252                 | 0.659271118685691 | high                      |                            |             |            |           |
| TCGA-XF-A9T4              | 1.35616438356164          | 1                 | 0.4346409                 | 0.4956035                  | 0.1187246   | 0          |           |
| 0.5372630.755118210662254 | high                      |                   |                           |                            |             |            |           |
| TCGA-K4-A6MB              | 1.28493150684932          | 0                 | 0.2672019                 | 3.6634090.1117159          |             |            |           |
| 0.03550292                | 0.7181733                 | 0.593557445059435 | high                      |                            |             |            |           |
| TCGA-ZF-A9R5              | 2.98630136986301          | 0                 | 0.05047636                | 6.7628490.3840914          |             |            |           |



|              |                                     |                           |                            |                    |             |            |  |  |
|--------------|-------------------------------------|---------------------------|----------------------------|--------------------|-------------|------------|--|--|
|              | 0.1408419                           | 3.37204                   | 0.150783315284307          | low                |             |            |  |  |
| TCGA-E7-A85H | 1.07945205479452                    | 0                         | 0.1648848                  | 2.3501430.07238442 | 0           |            |  |  |
|              | 1.3600180.517623513627617           | low                       |                            |                    |             |            |  |  |
| TCGA-G2-AA3C | 0.578082191780822                   | 1                         | 0.2377633                  | 1.2990780          | 0           | 1.150752   |  |  |
|              | 0.639101790034986                   | high                      |                            |                    |             |            |  |  |
| TCGA-XF-A9SM | 2.87123287671233                    | 0                         | 0.4292626                  | 0.6118386          | 0.2826695   |            |  |  |
|              | 0.04990633                          | 1.0680570.536269226978696 | low                        |                    |             |            |  |  |
| TCGA-DK-A3IN | 0.684931506849315                   | 1                         | 0.9389444                  | 2.05594            | 0.09558181  | 0          |  |  |
|              | 0.4007312                           | 0.790549268922898         | high                       |                    |             |            |  |  |
| TCGA-XF-A8HC | 0.547945205479452                   | 1                         | 0                          | 1.6427240.1806997  | 0           | 1.447842   |  |  |
|              | 0.459851655486775                   | low                       |                            |                    |             |            |  |  |
| TCGA-ZF-AA4W | 5.01369863013699                    | 0                         | 0.05814429                 | 0                  | 0.06806758  | 0          |  |  |
|              | 0.7927125                           | 0.712482448627342         | high                       |                    |             |            |  |  |
| TCGA-LC-A66R | 1.27671232876712                    | 0                         | 0.9040558                  | 0.2342860.7216009  |             |            |  |  |
|              | 0.1528815                           | 1.0532680.3884670912256   | low                        |                    |             |            |  |  |
| TCGA-E7-A8O7 | 1.27671232876712                    | 0                         | 0.1527037.6177990.06703663 | 0.1065201          |             |            |  |  |
|              | 1.6655060.359558313079187           | low                       |                            |                    |             |            |  |  |
| TCGA-FJ-A3Z9 | 1.05479452054795                    | 1                         | 0                          | 4.2810020.06939729 | 0.2756778   |            |  |  |
|              | 1.8588560.412017340996568           | low                       |                            |                    |             |            |  |  |
| TCGA-G2-A2ES | 2.75068493150685                    | 1                         | 0.3609896                  | 0.3430182          | 0.02112992  | 0          |  |  |
|              | 0.6201173                           | 0.806779560740708         | high                       |                    |             |            |  |  |
| TCGA-XF-AAN4 | 2.25479452054795                    | 1                         | 2.7534381.5698170.2417519  | 0.06402327         |             |            |  |  |
|              | 1.0886340.696712716031512           | high                      |                            |                    |             |            |  |  |
| TCGA-E7-A5KE | 0.0465753424657534                  | 0                         | 0.09757717                 | 3.8942160          | 0.04537752  |            |  |  |
|              | 1.9954830.409817448644292           | low                       |                            |                    |             |            |  |  |
| TCGA-ZF-AA53 | 4.82465753424658                    | 0                         | 0.1920471                  | 0.6082876          | 0.03747051  | 0          |  |  |
|              | 0.3141937                           | 0.854120892385117         | high                       |                    |             |            |  |  |
| TCGA-CU-A72E | 1.13150684931507                    | 1                         | 0.4040793                  | 1.7801910.06450575 | 0           |            |  |  |
|              | 0.9215107                           | 0.646162853053611         | high                       |                    |             |            |  |  |
| TCGA-2F-A9KR | 8.72054794520548                    | 1                         | 0.1021467                  | 1.3103290.3587391  | 0           |            |  |  |
|              | 3.7600760.176320778680768           | low                       |                            |                    |             |            |  |  |
| TCGA-E5-A4U1 | 3.23561643835616                    | 0                         | 0.1132879                  | 1.3994240.3315559  |             |            |  |  |
|              | 0.31610213.344610.00668942736251224 | low                       |                            |                    |             |            |  |  |
| TCGA-FD-A5BV | 0.446575342465753                   | 1                         | 0                          | 15.40966993        | 0.29531776  | 0.06703642 |  |  |
|              | 0.66819902                          | 0.259418961144343         | low                        |                    |             |            |  |  |
| TCGA-DK-A3IU | 1.93424657534247                    | 1                         | 1.0015220.5777950.1046829  | 0                  |             |            |  |  |
|              | 0.3803694                           | 0.861873317997061         | high                       |                    |             |            |  |  |
| TCGA-FD-A3SM | 1.4986301369863                     | 1                         | 0.631069729                | 1.359213098        | 0.197005946 | 0          |  |  |
|              | 0.401506682                         | 0.716330246953883         | high                       |                    |             |            |  |  |
| TCGA-BT-A20J | 1.58630136986301                    | 1                         | 1.0590806                  | 2.571798177        | 0.172198661 | 0          |  |  |
|              | 0.304823716                         | 0.748048355958394         | high                       |                    |             |            |  |  |
| TCGA-E7-A677 | 2.24657534246575                    | 0                         | 0.2350462                  | 2.4567920.1547779  | 0           |            |  |  |
|              | 1.5862330.441979107353728           | low                       |                            |                    |             |            |  |  |
| TCGA-HQ-A5NE | 1.01369863013699                    | 1                         | 0.7414635                  | 4.0394250.05786711 |             |            |  |  |

|              |                           |                           |                   |                           |            |   |  |  |
|--------------|---------------------------|---------------------------|-------------------|---------------------------|------------|---|--|--|
|              | 0.09194985                | 0.6065263                 | 0.684489173134084 | high                      |            |   |  |  |
| TCGA-CF-A47S | 0.912328767123288         | 0                         | 0.06865367        | 5.43632                   | 0.05358037 |   |  |  |
|              | 0.04256915                | 2.1902230.332357831447028 | low               |                           |            |   |  |  |
| TCGA-E7-A5KF | 0.0547945205479452        | 0                         | 0                 | 11.083840.1790020.1218991 |            |   |  |  |
|              | 1.3460890.294093700291729 | low                       |                   |                           |            |   |  |  |
| TCGA-XF-A9SX | 1.96986301369863          | 1                         | 0.1472713         | 0.5597586                 | 0.08620282 | 0 |  |  |
|              | 1.5661070.522554344401004 | low                       |                   |                           |            |   |  |  |
| TCGA-G2-A2EK | 1.32876712328767          | 0                         | 0.3577096         | 3.9768480.2512552         |            |   |  |  |
|              | 0.03327002                | 1.0046310.464709311076784 | low               |                           |            |   |  |  |
| TCGA-XF-A8HD | 8.12054794520548          | 0                         | 0.4918876         | 1.6179220.8416071         | 0          |   |  |  |
|              | 1.7848730.226662091068943 | low                       |                   |                           |            |   |  |  |
| TCGA-GV-A3JX | 1.59178082191781          | 0                         | 0.3117886         | 0.6583702                 | 0.1216668  | 0 |  |  |
|              | 0.3589549                 | 0.783064551356029         | high              |                           |            |   |  |  |
