# Supplementary material for: Ferroptosis‐Related Long Noncoding RNAs Have Excellent Predictive Ability for Multiomic Characteristics of Bladder Cancer
Source: Hindawi journal article supplement (doi:10.1155/2022/9316847), 2022-01-01
Supplement: f1 [file 9316847.f1.zip]

| Id           | Age  | Gender | Grade      | Stage           | T      | M  | N |
|--------------|------|--------|------------|-----------------|--------|----|---|
| TCGA-ZF-A9RM | >65  | MALE   | High Grade | Stage I-IIT1-T2 | unknow | N0 |   |
| TCGA-CF-A9FM | <=65 | MALE   | High Grade | Stage I-IIT1-T2 | M0     | N0 |   |
| TCGA-CF-A8HX | <=65 | FEMALE | High Grade | Stage I-IIT1-T2 | M0     | N0 |   |
| TCGA-DK-AA6M | <=65 | FEMALE | High Grade | Stage I-IIT1-T2 | M0     | N0 |   |
| TCGA-G2-AA3B | >65  | FEMALE | High Grade | Stage I-IIT1-T2 | M0     | N0 |   |
| TCGA-CF-A47V | <=65 | MALE   | High Grade | Stage I-IIT1-T2 | M0     | N0 |   |
| TCGA-CF-A9FF | <=65 | MALE   | High Grade | Stage I-IIT1-T2 | M0     | N0 |   |
| TCGA-CF-A8HY | <=65 | MALE   | High Grade | Stage I-IIT1-T2 | M0     | N0 |   |
| TCGA-E7-A8O8 | <=65 | MALE   | High Grade | Stage I-IIT1-T2 | M0     | N0 |   |
| TCGA-E7-A4XJ | >65  | MALE   | High Grade | Stage I-IIT1-T2 | M0     | N0 |   |
| TCGA-DK-AA6W | >65  | MALE   | High Grade | Stage I-IIT1-T2 | M0     | N0 |   |
| TCGA-CF-A47T | <=65 | FEMALE | Low Grade  | Stage I-IIT1-T2 | M0     | N0 |   |
| TCGA-CF-A47S | <=65 | MALE   | Low Grade  | Stage I-IIT1-T2 | M0     | N0 |   |
| TCGA-CF-A47W | <=65 | MALE   | Low Grade  | Stage I-IIT1-T2 | M0     | N0 |   |
| TCGA-CF-A3MG | <=65 | MALE   | Low Grade  | Stage I-IIT1-T2 | M0     | N0 |   |
| TCGA-E7-A8O7 | <=65 | MALE   | Low Grade  | Stage I-IIT1-T2 | M0     | N0 |   |
| TCGA-CF-A7I0 | <=65 | MALE   | Low Grade  | Stage I-IIT1-T2 | M0     | N0 |   |
| TCGA-CF-A47Y | <=65 | MALE   | Low Grade  | Stage I-IIT1-T2 | M0     | N0 |   |
| TCGA-CF-A5U8 | <=65 | MALE   | Low Grade  | Stage I-IIT1-T2 | M0     | N0 |   |
| TCGA-CF-A47X | <=65 | MALE   | Low Grade  | Stage I-IIT1-T2 | M0     | N0 |   |
| TCGA-CF-A3MI | <=65 | MALE   | Low Grade  | Stage I-IIT1-T2 | M0     | N0 |   |
| TCGA-CF-A5UA | >65  | MALE   | Low Grade  | Stage I-IIT1-T2 | M0     | N0 |   |
| TCGA-CF-A3MH | >65  | MALE   | Low Grade  | Stage I-IIT1-T2 | M0     | N0 |   |
| TCGA-CF-A9FH | >65  | MALE   | Low Grade  | Stage I-IIT1-T2 | M0     | N0 |   |
| TCGA-LT-A8JT | >65  | FEMALE | High Grade | Stage I-IIT1-T2 | M0     | N0 |   |
| TCGA-E7-A5KE | >65  | FEMALE | High Grade | Stage I-IIT1-T2 | M0     | N0 |   |
| TCGA-DK-A6AV | >65  | FEMALE | High Grade | Stage I-IIT1-T2 | M0     | N0 |   |
| TCGA-4Z-AA83 | <=65 | MALE   | High Grade | Stage I-IIT1-T2 | M0     | N0 |   |
| TCGA-4Z-AA7W | <=65 | MALE   | High Grade | Stage I-IIT1-T2 | M0     | N0 |   |
| TCGA-4Z-AA7Y | <=65 | MALE   | High Grade | Stage I-IIT1-T2 | M0     | N0 |   |
| TCGA-DK-AA77 | <=65 | MALE   | High Grade | Stage I-IIT1-T2 | M0     | N0 |   |
| TCGA-4Z-AA7O | <=65 | MALE   | High Grade | Stage I-IIT1-T2 | M0     | N0 |   |
| TCGA-DK-A6B1 | >65  | MALE   | High Grade | Stage I-IIT1-T2 | M0     | N0 |   |
| TCGA-DK-A3IS | >65  | MALE   | High Grade | Stage I-IIT1-T2 | M0     | N0 |   |
| TCGA-DK-A6AW | >65  | MALE   | High Grade | Stage I-IIT1-T2 | M0     | N0 |   |
| TCGA-4Z-AA80 | >65  | MALE   | High Grade | Stage I-IIT1-T2 | M0     | N0 |   |
| TCGA-E7-A5KF | >65  | MALE   | Low Grade  | Stage I-IIT1-T2 | M0     | N0 |   |
| TCGA-XF-A9SH | <=65 | FEMALE | High Grade | Stage I-IIT1-T2 | M0     | N0 |   |
| TCGA-DK-A2I1 | >65  | FEMALE | High Grade | Stage I-IIT1-T2 | M0     | N0 |   |
| TCGA-DK-A3IU | <=65 | MALE   | High Grade | Stage I-IIT1-T2 | M0     | N0 |   |
| TCGA-GC-A3RC | <=65 | MALE   | High Grade | Stage I-IIT1-T2 | M0     | N0 |   |
| TCGA-C4-A0F0 | <=65 | MALE   | High Grade | Stage I-IIT1-T2 | M0     | N0 |   |
| TCGA-DK-A6B0 | <=65 | MALE   | High Grade | Stage I-IIT1-T2 | M0     | N0 |   |

|              |             |            |                  |        |    |
|--------------|-------------|------------|------------------|--------|----|
| TCGA-GC-A3BM | >65 MALE    | High Grade | Stage I-II T1-T2 | M0     | N0 |
| TCGA-DK-AA71 | >65 MALE    | High Grade | Stage I-II T1-T2 | M0     | N0 |
| TCGA-BT-A20W | >65 MALE    | High Grade | Stage I-II T1-T2 | M0     | N0 |
| TCGA-E5-A4U1 | >65 MALE    | High Grade | Stage I-II T1-T2 | M0     | N0 |
| TCGA-ZF-A9R2 | >65 MALE    | High Grade | Stage I-II T1-T2 | M0     | N0 |
| TCGA-DK-A1A5 | >65 MALE    | High Grade | Stage I-II T1-T2 | M0     | N0 |
| TCGA-GC-A3OO | >65 MALE    | High Grade | Stage I-II T1-T2 | M0     | N0 |
| TCGA-4Z-AA81 | >65 MALE    | High Grade | Stage I-II T1-T2 | M0     | N0 |
| TCGA-2F-A9KT | >65 MALE    | High Grade | Stage I-II T1-T2 | M0     | N0 |
| TCGA-E7-A677 | >65 MALE    | Low Grade  | Stage I-II T1-T2 | M0     | N0 |
| TCGA-UY-A78O | >65 FEMALE  | High Grade | Stage I-II T1-T2 | unknow | N0 |
| TCGA-UY-A78P | >65 FEMALE  | High Grade | Stage I-II T1-T2 | unknow | N0 |
| TCGA-KQ-A41R | >65 FEMALE  | High Grade | Stage I-II T1-T2 | unknow | N0 |
| TCGA-XF-AAMQ | <=65 FEMALE | High Grade | Stage I-II T1-T2 | unknow | N0 |
| TCGA-GU-A766 | <=65 MALE   | High Grade | Stage I-II T1-T2 | unknow | N0 |
| TCGA-PQ-A6FI | >65 MALE    | High Grade | Stage I-II T1-T2 | unknow | N0 |
| TCGA-YC-A8S6 | >65 MALE    | High Grade | Stage I-II T1-T2 | unknow | N0 |
| TCGA-FD-A43P | >65 MALE    | High Grade | Stage I-II T1-T2 | unknow | N0 |
| TCGA-GV-A40G | >65 MALE    | High Grade | Stage I-II T1-T2 | unknow | N0 |
| TCGA-XF-A9SG | >65 MALE    | High Grade | Stage I-II T1-T2 | unknow | N0 |
| TCGA-FD-A43X | >65 MALE    | High Grade | Stage I-II T1-T2 | unknow | N0 |
| TCGA-FD-A3N6 | <=65 FEMALE | High Grade | Stage I-II T1-T2 | unknow | N0 |
| TCGA-YF-AA3L | <=65 FEMALE | High Grade | Stage I-II T1-T2 | unknow | N0 |
| TCGA-XF-A8HB | <=65 FEMALE | High Grade | Stage I-II T1-T2 | unknow | N0 |
| TCGA-XF-AAME | <=65 FEMALE | High Grade | Stage I-II T1-T2 | unknow | N0 |
| TCGA-UY-A8OD | >65 FEMALE  | High Grade | Stage I-II T1-T2 | unknow | N0 |
| TCGA-XF-A9SI | >65 FEMALE  | High Grade | Stage I-II T1-T2 | unknow | N0 |
| TCGA-FD-A5BU | >65 FEMALE  | High Grade | Stage I-II T1-T2 | unknow | N0 |
| TCGA-K4-A3WV | >65 FEMALE  | High Grade | Stage I-II T1-T2 | unknow | N0 |
| TCGA-GD-A76B | >65 FEMALE  | High Grade | Stage I-II T1-T2 | unknow | N0 |
| TCGA-GC-A6I1 | >65 FEMALE  | High Grade | Stage I-II T1-T2 | unknow | N0 |
| TCGA-GV-A6ZA | <=65 MALE   | High Grade | Stage I-II T1-T2 | unknow | N0 |
| TCGA-FD-A3B8 | <=65 MALE   | High Grade | Stage I-II T1-T2 | unknow | N0 |
| TCGA-FD-A5BR | <=65 MALE   | High Grade | Stage I-II T1-T2 | unknow | N0 |
| TCGA-K4-A54R | <=65 MALE   | High Grade | Stage I-II T1-T2 | unknow | N0 |
| TCGA-FD-A3NA | <=65 MALE   | High Grade | Stage I-II T1-T2 | unknow | N0 |
| TCGA-E7-A541 | >65 MALE    | High Grade | Stage I-II T1-T2 | unknow | N0 |
| TCGA-GU-A764 | >65 MALE    | High Grade | Stage I-II T1-T2 | unknow | N0 |
| TCGA-FD-A3N5 | >65 MALE    | High Grade | Stage I-II T1-T2 | unknow | N0 |
| TCGA-XF-AAN2 | >65 MALE    | High Grade | Stage I-II T1-T2 | unknow | N0 |
| TCGA-UY-A9PH | >65 MALE    | High Grade | Stage I-II T1-T2 | unknow | N0 |
| TCGA-FD-A3B6 | >65 MALE    | High Grade | Stage I-II T1-T2 | unknow | N0 |
| TCGA-K4-A5RJ | >65 MALE    | High Grade | Stage I-II T1-T2 | unknow | N0 |
| TCGA-XF-AAML | >65 MALE    | High Grade | Stage I-II T1-T2 | unknow | N0 |

|              |             |            |                    |        |        |
|--------------|-------------|------------|--------------------|--------|--------|
| TCGA-BT-A20J | >65 MALE    | High Grade | Stage I-II T1-T2   | unknow | N0     |
| TCGA-FD-A62P | >65 MALE    | High Grade | Stage I-II T1-T2   | unknow | N0     |
| TCGA-BT-A3PK | >65 MALE    | High Grade | Stage I-II T1-T2   | unknow | N0     |
| TCGA-K4-A4AC | >65 MALE    | High Grade | Stage I-II T1-T2   | unknow | N0     |
| TCGA-BL-A0C8 | >65 MALE    | High Grade | Stage I-II T1-T2   | M0     | unknow |
| TCGA-ZF-A9RF | >65 MALE    | High Grade | Stage I-II T1-T2   | M0     | unknow |
| TCGA-ZF-A9R3 | <=65 FEMALE | High Grade | Stage I-II T1-T2   | M0     | unknow |
| TCGA-ZF-AA51 | >65 FEMALE  | High Grade | Stage I-II T1-T2   | M0     | unknow |
| TCGA-ZF-AA4X | <=65 MALE   | High Grade | Stage I-II T1-T2   | M0     | unknow |
| TCGA-ZF-AA53 | <=65 MALE   | High Grade | Stage I-II T1-T2   | M0     | unknow |
| TCGA-E7-A97P | >65 MALE    | High Grade | Stage I-II T1-T2   | M0     | unknow |
| TCGA-ZF-A9R4 | >65 MALE    | High Grade | Stage I-II T1-T2   | M0     | unknow |
| TCGA-E7-A3X6 | >65 MALE    | Low Grade  | Stage I-II T1-T2   | M0     | unknow |
| TCGA-E7-A6MF | <=65 MALE   | Low Grade  | Stage I-II T1-T2   | M0     | unknow |
| TCGA-E7-A4IJ | <=65 MALE   | High Grade | Stage I-II T1-T2   | M0     | unknow |
| TCGA-E7-A519 | >65 MALE    | High Grade | Stage I-II T1-T2   | M0     | unknow |
| TCGA-E7-A6ME | >65 MALE    | High Grade | Stage I-II T1-T2   | M0     | unknow |
| TCGA-GV-A3JW | >65 MALE    | High Grade | Stage I-II T1-T2   | unknow | unknow |
| TCGA-YF-AA3M | <=65 MALE   | High Grade | Stage I-II T1-T2   | unknow | unknow |
| TCGA-XF-AAMW | >65 FEMALE  | High Grade | Stage III-IV T1-T2 | unknow | N0     |
| TCGA-DK-A1A6 | <=65 MALE   | High Grade | Stage III-IV T1-T2 | M0     | N1-3   |
| TCGA-4Z-AA82 | <=65 MALE   | High Grade | Stage III-IV T1-T2 | M0     | N1-3   |
| TCGA-CU-A3QU | <=65 MALE   | High Grade | Stage III-IV T1-T2 | M0     | N1-3   |
| TCGA-DK-A2I6 | >65 MALE    | High Grade | Stage III-IV T1-T2 | M0     | N1-3   |
| TCGA-UY-A78N | >65 MALE    | High Grade | Stage III-IV T1-T2 | unknow | N1-3   |
| TCGA-E5-A2PC | <=65 FEMALE | High Grade | Stage III-IV T1-T2 | unknow | N1-3   |
| TCGA-XF-A9T4 | <=65 MALE   | High Grade | Stage III-IV T1-T2 | unknow | N1-3   |
| TCGA-FD-A3B5 | >65 MALE    | High Grade | Stage III-IV T1-T2 | unknow | N1-3   |
| TCGA-CU-A0YR | >65 MALE    | High Grade | Stage III-IV T1-T2 | M0     | N1-3   |
| TCGA-ZF-AA5P | <=65 MALE   | High Grade | Stage III-IV T1-T2 | M0     | N1-3   |
| TCGA-UY-A78M | >65 FEMALE  | High Grade | Stage III-IV T1-T2 | unknow | N1-3   |
| TCGA-GU-AATP | >65 MALE    | High Grade | Stage III-IV T1-T2 | unknow | N1-3   |
| TCGA-XF-A8HI | <=65 FEMALE | High Grade | Stage III-IV T1-T2 | unknow | N1-3   |
| TCGA-FD-A3SJ | <=65 MALE   | High Grade | Stage III-IV T1-T2 | unknow | N1-3   |
| TCGA-UY-A9PE | >65 MALE    | High Grade | Stage III-IV T1-T2 | unknow | N1-3   |
| TCGA-ZF-AA5N | <=65 FEMALE | High Grade | Stage III-IV T1-T2 | M1     | unknow |
| TCGA-HQ-A2OE | >65 MALE    | unknow     | unknow T1-T2       | unknow | N1-3   |
| TCGA-G2-A2ES | >65 MALE    | High Grade | Stage I-II T3-T4   | M0     | N0     |
| TCGA-CF-A3MF | <=65 MALE   | Low Grade  | Stage III-IV T3-T4 | M0     | N0     |
| TCGA-BL-A13I | <=65 FEMALE | High Grade | Stage III-IV T3-T4 | M0     | N0     |
| TCGA-DK-A3WX | >65 FEMALE  | High Grade | Stage III-IV T3-T4 | M0     | N0     |
| TCGA-DK-A3WY | >65 FEMALE  | High Grade | Stage III-IV T3-T4 | M0     | N0     |
| TCGA-DK-A3X1 | >65 FEMALE  | High Grade | Stage III-IV T3-T4 | M0     | N0     |
| TCGA-CF-A27C | <=65 MALE   | High Grade | Stage III-IV T3-T4 | M0     | N0     |

|              |      |        |            |              |       |    |    |
|--------------|------|--------|------------|--------------|-------|----|----|
| TCGA-DK-A3WW | <=65 | MALE   | High Grade | Stage III-IV | T3-T4 | M0 | N0 |
| TCGA-DK-A1AA | <=65 | MALE   | High Grade | Stage III-IV | T3-T4 | M0 | N0 |
| TCGA-HQ-A5NE | <=65 | MALE   | High Grade | Stage III-IV | T3-T4 | M0 | N0 |
| TCGA-ZF-A9R5 | <=65 | MALE   | High Grade | Stage III-IV | T3-T4 | M0 | N0 |
| TCGA-CF-A1HR | <=65 | MALE   | High Grade | Stage III-IV | T3-T4 | M0 | N0 |
| TCGA-BL-A3JM | <=65 | MALE   | High Grade | Stage III-IV | T3-T4 | M0 | N0 |
| TCGA-DK-A3IT | <=65 | MALE   | High Grade | Stage III-IV | T3-T4 | M0 | N0 |
| TCGA-E7-A85H | <=65 | MALE   | High Grade | Stage III-IV | T3-T4 | M0 | N0 |
| TCGA-DK-A1AG | <=65 | MALE   | High Grade | Stage III-IV | T3-T4 | M0 | N0 |
| TCGA-E7-A7XN | >65  | MALE   | High Grade | Stage III-IV | T3-T4 | M0 | N0 |
| TCGA-DK-A3IQ | >65  | MALE   | High Grade | Stage III-IV | T3-T4 | M0 | N0 |
| TCGA-DK-AA74 | >65  | MALE   | High Grade | Stage III-IV | T3-T4 | M0 | N0 |
| TCGA-DK-A3IM | >65  | MALE   | High Grade | Stage III-IV | T3-T4 | M0 | N0 |
| TCGA-DK-AA75 | >65  | MALE   | High Grade | Stage III-IV | T3-T4 | M0 | N0 |
| TCGA-DK-A1AE | >65  | MALE   | High Grade | Stage III-IV | T3-T4 | M0 | N0 |
| TCGA-E7-A678 | <=65 | MALE   | Low Grade  | Stage III-IV | T3-T4 | M0 | N0 |
| TCGA-E7-A7DU | >65  | MALE   | Low Grade  | Stage III-IV | T3-T4 | M0 | N0 |
| TCGA-2F-A9KR | <=65 | FEMALE | High Grade | Stage III-IV | T3-T4 | M0 | N0 |
| TCGA-BT-A20U | >65  | FEMALE | High Grade | Stage III-IV | T3-T4 | M0 | N0 |
| TCGA-BT-A2LB | >65  | FEMALE | High Grade | Stage III-IV | T3-T4 | M0 | N0 |
| TCGA-BT-A20P | >65  | FEMALE | High Grade | Stage III-IV | T3-T4 | M0 | N0 |
| TCGA-GC-A3RD | >65  | FEMALE | High Grade | Stage III-IV | T3-T4 | M0 | N0 |
| TCGA-GC-A3I6 | <=65 | MALE   | High Grade | Stage III-IV | T3-T4 | M0 | N0 |
| TCGA-BT-A2LA | <=65 | MALE   | High Grade | Stage III-IV | T3-T4 | M0 | N0 |
| TCGA-CU-A0YN | <=65 | MALE   | High Grade | Stage III-IV | T3-T4 | M0 | N0 |
| TCGA-4Z-AA7N | <=65 | MALE   | High Grade | Stage III-IV | T3-T4 | M0 | N0 |
| TCGA-4Z-AA7M | <=65 | MALE   | High Grade | Stage III-IV | T3-T4 | M0 | N0 |
| TCGA-2F-A9KQ | >65  | MALE   | High Grade | Stage III-IV | T3-T4 | M0 | N0 |
| TCGA-G2-A2EO | >65  | MALE   | High Grade | Stage III-IV | T3-T4 | M0 | N0 |
| TCGA-R3-A69X | >65  | MALE   | High Grade | Stage III-IV | T3-T4 | M0 | N0 |
| TCGA-GC-A4ZW | >65  | MALE   | High Grade | Stage III-IV | T3-T4 | M0 | N0 |
| TCGA-BT-A42E | >65  | MALE   | High Grade | Stage III-IV | T3-T4 | M0 | N0 |
| TCGA-MV-A51V | >65  | MALE   | High Grade | Stage III-IV | T3-T4 | M0 | N0 |
| TCGA-XF-A8HF | >65  | MALE   | High Grade | Stage III-IV | T3-T4 | M0 | N0 |
| TCGA-BT-A0YX | >65  | FEMALE | High Grade | Stage III-IV | T3-T4 | M0 | N0 |
| TCGA-C4-A0F6 | >65  | FEMALE | High Grade | Stage III-IV | T3-T4 | M0 | N0 |
| TCGA-GC-A3RB | <=65 | MALE   | High Grade | Stage III-IV | T3-T4 | M0 | N0 |
| TCGA-DK-AA6S | <=65 | MALE   | High Grade | Stage III-IV | T3-T4 | M0 | N0 |
| TCGA-ZF-AA4V | >65  | MALE   | High Grade | Stage III-IV | T3-T4 | M0 | N0 |
| TCGA-GU-A42Q | >65  | MALE   | High Grade | Stage III-IV | T3-T4 | M0 | N0 |
| TCGA-XF-AAMJ | >65  | MALE   | High Grade | Stage III-IV | T3-T4 | M0 | N0 |
| TCGA-C4-A0F1 | >65  | MALE   | High Grade | Stage III-IV | T3-T4 | M0 | N0 |
| TCGA-DK-A1AC | >65  | MALE   | High Grade | Stage III-IV | T3-T4 | M0 | N0 |
| TCGA-KQ-A41N | >65  | MALE   | High Grade | Stage III-IV | T3-T4 | M0 | N0 |

|              |             |            |              |       |        |    |
|--------------|-------------|------------|--------------|-------|--------|----|
| TCGA-CU-A3KJ | >65 MALE    | High Grade | Stage III-IV | T3-T4 | M0     | N0 |
| TCGA-BT-A3PJ | >65 MALE    | High Grade | Stage III-IV | T3-T4 | M0     | N0 |
| TCGA-DK-A2I4 | >65 MALE    | High Grade | Stage III-IV | T3-T4 | M0     | N0 |
| TCGA-CF-A9FL | >65 MALE    | High Grade | Stage III-IV | T3-T4 | M0     | N0 |
| TCGA-GU-A763 | >65 MALE    | High Grade | Stage III-IV | T3-T4 | M0     | N0 |
| TCGA-XF-AAN1 | >65 FEMALE  | High Grade | Stage III-IV | T3-T4 | M0     | N0 |
| TCGA-4Z-AA7S | >65 MALE    | High Grade | Stage III-IV | T3-T4 | M0     | N0 |
| TCGA-SY-A9G5 | >65 MALE    | High Grade | Stage III-IV | T3-T4 | M0     | N0 |
| TCGA-CU-A3YL | >65 MALE    | High Grade | Stage III-IV | T3-T4 | M0     | N0 |
| TCGA-CU-A5W6 | >65 MALE    | High Grade | Stage III-IV | T3-T4 | M0     | N0 |
| TCGA-4Z-AA87 | >65 MALE    | High Grade | Stage III-IV | T3-T4 | M0     | N0 |
| TCGA-DK-A3IN | >65 MALE    | High Grade | Stage III-IV | T3-T4 | M0     | N0 |
| TCGA-4Z-AA89 | <=65 MALE   | High Grade | Stage III-IV | T3-T4 | M0     | N0 |
| TCGA-4Z-AA7R | >65 MALE    | High Grade | Stage III-IV | T3-T4 | M0     | N0 |
| TCGA-FD-A3B3 | >65 FEMALE  | High Grade | Stage III-IV | T3-T4 | unknow | N0 |
| TCGA-GC-A3WC | >65 FEMALE  | High Grade | Stage III-IV | T3-T4 | unknow | N0 |
| TCGA-FD-A5BY | <=65 FEMALE | High Grade | Stage III-IV | T3-T4 | unknow | N0 |
| TCGA-K4-A5RI | >65 FEMALE  | High Grade | Stage III-IV | T3-T4 | unknow | N0 |
| TCGA-K4-A6FZ | >65 FEMALE  | High Grade | Stage III-IV | T3-T4 | unknow | N0 |
| TCGA-PQ-A6FN | >65 FEMALE  | High Grade | Stage III-IV | T3-T4 | unknow | N0 |
| TCGA-S5-AA26 | <=65 MALE   | High Grade | Stage III-IV | T3-T4 | unknow | N0 |
| TCGA-UY-A9PA | <=65 MALE   | High Grade | Stage III-IV | T3-T4 | unknow | N0 |
| TCGA-UY-A9PB | <=65 MALE   | High Grade | Stage III-IV | T3-T4 | unknow | N0 |
| TCGA-K4-AAQO | <=65 MALE   | High Grade | Stage III-IV | T3-T4 | unknow | N0 |
| TCGA-FD-A6TK | <=65 MALE   | High Grade | Stage III-IV | T3-T4 | unknow | N0 |
| TCGA-GD-A6C6 | <=65 MALE   | High Grade | Stage III-IV | T3-T4 | unknow | N0 |
| TCGA-FD-A3B7 | >65 MALE    | High Grade | Stage III-IV | T3-T4 | unknow | N0 |
| TCGA-K4-A3WS | >65 MALE    | High Grade | Stage III-IV | T3-T4 | unknow | N0 |
| TCGA-K4-A5RH | >65 MALE    | High Grade | Stage III-IV | T3-T4 | unknow | N0 |
| TCGA-BT-A20N | >65 MALE    | High Grade | Stage III-IV | T3-T4 | unknow | N0 |
| TCGA-BT-A20O | >65 MALE    | High Grade | Stage III-IV | T3-T4 | unknow | N0 |
| TCGA-FD-A43N | >65 MALE    | High Grade | Stage III-IV | T3-T4 | unknow | N0 |
| TCGA-ZF-A9RC | >65 MALE    | High Grade | Stage III-IV | T3-T4 | unknow | N0 |
| TCGA-XF-A8HD | >65 MALE    | High Grade | Stage III-IV | T3-T4 | unknow | N0 |
| TCGA-FD-A6TD | >65 MALE    | High Grade | Stage III-IV | T3-T4 | unknow | N0 |
| TCGA-UY-A9PD | >65 MALE    | High Grade | Stage III-IV | T3-T4 | unknow | N0 |
| TCGA-FD-A6TB | >65 MALE    | High Grade | Stage III-IV | T3-T4 | unknow | N0 |
| TCGA-FD-A5BV | <=65 FEMALE | High Grade | Stage III-IV | T3-T4 | unknow | N0 |
| TCGA-FD-A62S | <=65 FEMALE | High Grade | Stage III-IV | T3-T4 | unknow | N0 |
| TCGA-XF-AAN5 | <=65 FEMALE | High Grade | Stage III-IV | T3-T4 | unknow | N0 |
| TCGA-FD-A5C1 | <=65 FEMALE | High Grade | Stage III-IV | T3-T4 | unknow | N0 |
| TCGA-2F-A9KW | >65 FEMALE  | High Grade | Stage III-IV | T3-T4 | unknow | N0 |
| TCGA-ZF-A9RG | >65 FEMALE  | High Grade | Stage III-IV | T3-T4 | unknow | N0 |
| TCGA-FD-A43S | >65 FEMALE  | High Grade | Stage III-IV | T3-T4 | unknow | N0 |

|              |            |            |              |              |        |           |
|--------------|------------|------------|--------------|--------------|--------|-----------|
| TCGA-XF-AAN8 | >65 FEMALE | High Grade | Stage III-IV | T3-T4        | unknow | N0        |
| TCGA-XF-AAN4 | >65 FEMALE | High Grade | Stage III-IV | T3-T4        | unknow | N0        |
| TCGA-XF-AAMX | >65 FEMALE | High Grade | Stage III-IV | T3-T4        | unknow | N0        |
| TCGA-XF-A9T6 | >65 FEMALE | High Grade | Stage III-IV | T3-T4        | unknow | N0        |
| TCGA-GV-A3QI | <=65       | MALE       | High Grade   | Stage III-IV | T3-T4  | unknow N0 |
| TCGA-XF-A8HE | <=65       | MALE       | High Grade   | Stage III-IV | T3-T4  | unknow N0 |
| TCGA-XF-AAMR | <=65       | MALE       | High Grade   | Stage III-IV | T3-T4  | unknow N0 |
| TCGA-XF-A9T2 | <=65       | MALE       | High Grade   | Stage III-IV | T3-T4  | unknow N0 |
| TCGA-ZF-AA4W | <=65       | MALE       | High Grade   | Stage III-IV | T3-T4  | unknow N0 |
| TCGA-GV-A3JX | <=65       | MALE       | High Grade   | Stage III-IV | T3-T4  | unknow N0 |
| TCGA-XF-A9SP | <=65       | MALE       | High Grade   | Stage III-IV | T3-T4  | unknow N0 |
| TCGA-FD-A3SP | <=65       | MALE       | High Grade   | Stage III-IV | T3-T4  | unknow N0 |
| TCGA-XF-A9T8 | <=65       | MALE       | High Grade   | Stage III-IV | T3-T4  | unknow N0 |
| TCGA-FD-A5BS | >65 MALE   | High Grade | Stage III-IV | T3-T4        | unknow | N0        |
| TCGA-XF-A9ST | >65 MALE   | High Grade | Stage III-IV | T3-T4        | unknow | N0        |
| TCGA-GU-AATQ | >65 MALE   | High Grade | Stage III-IV | T3-T4        | unknow | N0        |
| TCGA-XF-A9T0 | >65 MALE   | High Grade | Stage III-IV | T3-T4        | unknow | N0        |
| TCGA-XF-A8HG | >65 MALE   | High Grade | Stage III-IV | T3-T4        | unknow | N0        |
| TCGA-FD-A62N | >65 MALE   | High Grade | Stage III-IV | T3-T4        | unknow | N0        |
| TCGA-XF-A9SM | >65 MALE   | High Grade | Stage III-IV | T3-T4        | unknow | N0        |
| TCGA-XF-AAMY | >65 MALE   | High Grade | Stage III-IV | T3-T4        | unknow | N0        |
| TCGA-FD-A3SN | >65 MALE   | High Grade | Stage III-IV | T3-T4        | unknow | N0        |
| TCGA-FD-A5BT | >65 MALE   | High Grade | Stage III-IV | T3-T4        | unknow | N0        |
| TCGA-KQ-A41Q | >65 MALE   | High Grade | Stage III-IV | T3-T4        | unknow | N0        |
| TCGA-FD-A43Y | <=65       | MALE       | High Grade   | Stage III-IV | T3-T4  | unknow N0 |
| TCGA-FD-A3B4 | <=65       | FEMALE     | High Grade   | Stage III-IV | T3-T4  | unknow N0 |
| TCGA-5N-A9KM | >65 FEMALE | High Grade | Stage III-IV | T3-T4        | unknow | N0        |
| TCGA-ZF-AA56 | >65 FEMALE | High Grade | Stage III-IV | T3-T4        | unknow | N0        |
| TCGA-FD-A6TC | >65 FEMALE | High Grade | Stage III-IV | T3-T4        | unknow | N0        |
| TCGA-BL-A5ZZ | >65 FEMALE | High Grade | Stage III-IV | T3-T4        | unknow | N0        |
| TCGA-FT-A3EE | >65 FEMALE | High Grade | Stage III-IV | T3-T4        | unknow | N0        |
| TCGA-XF-AAMG | <=65       | MALE       | High Grade   | Stage III-IV | T3-T4  | unknow N0 |
| TCGA-H4-A2HO | <=65       | MALE       | High Grade   | Stage III-IV | T3-T4  | unknow N0 |
| TCGA-BT-A0S7 | >65 MALE   | High Grade | Stage III-IV | T3-T4        | unknow | N0        |
| TCGA-K4-A4AB | >65 MALE   | High Grade | Stage III-IV | T3-T4        | unknow | N0        |
| TCGA-K4-A3WU | >65 MALE   | High Grade | Stage III-IV | T3-T4        | unknow | N0        |
| TCGA-DK-AA6Q | <=65       | FEMALE     | High Grade   | Stage III-IV | T3-T4  | M0 N1-3   |
| TCGA-2F-A9KO | <=65       | MALE       | High Grade   | Stage III-IV | T3-T4  | M0 N1-3   |
| TCGA-DK-A6B2 | >65 MALE   | High Grade | Stage III-IV | T3-T4        | M0     | N1-3      |
| TCGA-G2-AA3F | >65 MALE   | High Grade | Stage III-IV | T3-T4        | M0     | N1-3      |
| TCGA-KQ-A41O | >65 MALE   | High Grade | Stage III-IV | T3-T4        | M0     | N1-3      |
| TCGA-BT-A2LD | >65 FEMALE | High Grade | Stage III-IV | T3-T4        | M0     | N1-3      |
| TCGA-4Z-AA86 | >65 MALE   | High Grade | Stage III-IV | T3-T4        | M0     | N1-3      |
| TCGA-GU-A42P | >65 MALE   | High Grade | Stage III-IV | T3-T4        | M0     | N1-3      |

|              |             |            |              |       |        |      |
|--------------|-------------|------------|--------------|-------|--------|------|
| TCGA-BT-A20R | >65 FEMALE  | High Grade | Stage III-IV | T3-T4 | M0     | N1-3 |
| TCGA-BT-A20T | <=65 MALE   | High Grade | Stage III-IV | T3-T4 | M0     | N1-3 |
| TCGA-G2-AA3C | >65 MALE    | High Grade | Stage III-IV | T3-T4 | M0     | N1-3 |
| TCGA-HQ-A5ND | >65 MALE    | High Grade | Stage III-IV | T3-T4 | M0     | N1-3 |
| TCGA-ZF-A9R1 | >65 MALE    | High Grade | Stage III-IV | T3-T4 | M0     | N1-3 |
| TCGA-DK-AA6R | >65 MALE    | High Grade | Stage III-IV | T3-T4 | M0     | N1-3 |
| TCGA-SY-A9G0 | >65 MALE    | High Grade | Stage III-IV | T3-T4 | M0     | N1-3 |
| TCGA-E7-A6MD | >65 MALE    | High Grade | Stage III-IV | T3-T4 | M0     | N1-3 |
| TCGA-C4-A0EZ | >65 FEMALE  | High Grade | Stage III-IV | T3-T4 | M1     | N1-3 |
| TCGA-DK-AA6L | <=65 MALE   | High Grade | Stage III-IV | T3-T4 | unknow | N1-3 |
| TCGA-FD-A5BZ | >65 FEMALE  | High Grade | Stage III-IV | T3-T4 | unknow | N1-3 |
| TCGA-XF-A9T5 | >65 FEMALE  | High Grade | Stage III-IV | T3-T4 | unknow | N1-3 |
| TCGA-GC-A6I3 | >65 FEMALE  | High Grade | Stage III-IV | T3-T4 | unknow | N1-3 |
| TCGA-BT-A42B | <=65 MALE   | High Grade | Stage III-IV | T3-T4 | unknow | N1-3 |
| TCGA-XF-AAN7 | <=65 MALE   | High Grade | Stage III-IV | T3-T4 | unknow | N1-3 |
| TCGA-GC-A3YS | <=65 MALE   | High Grade | Stage III-IV | T3-T4 | unknow | N1-3 |
| TCGA-UY-A8OB | <=65 MALE   | High Grade | Stage III-IV | T3-T4 | unknow | N1-3 |
| TCGA-ZF-AA4R | >65 MALE    | High Grade | Stage III-IV | T3-T4 | unknow | N1-3 |
| TCGA-FD-A3SO | >65 MALE    | High Grade | Stage III-IV | T3-T4 | unknow | N1-3 |
| TCGA-XF-A9SU | >65 FEMALE  | High Grade | Stage III-IV | T3-T4 | unknow | N1-3 |
| TCGA-K4-A6MB | <=65 MALE   | High Grade | Stage III-IV | T3-T4 | unknow | N1-3 |
| TCGA-XF-A9SK | <=65 MALE   | High Grade | Stage III-IV | T3-T4 | unknow | N1-3 |
| TCGA-GV-A3JV | >65 MALE    | High Grade | Stage III-IV | T3-T4 | unknow | N1-3 |
| TCGA-XF-AAMH | >65 MALE    | High Grade | Stage III-IV | T3-T4 | unknow | N1-3 |
| TCGA-FD-A5BX | >65 MALE    | High Grade | Stage III-IV | T3-T4 | unknow | N1-3 |
| TCGA-UY-A8OC | >65 MALE    | High Grade | Stage III-IV | T3-T4 | unknow | N1-3 |
| TCGA-GD-A3OQ | <=65 MALE   | High Grade | Stage III-IV | T3-T4 | unknow | N1-3 |
| TCGA-BT-A42F | <=65 MALE   | High Grade | Stage III-IV | T3-T4 | unknow | N1-3 |
| TCGA-K4-A83P | >65 MALE    | unknow     | Stage III-IV | T3-T4 | unknow | N1-3 |
| TCGA-FD-A6TI | >65 MALE    | High Grade | Stage III-IV | T3-T4 | unknow | N1-3 |
| TCGA-DK-A1A7 | >65 FEMALE  | High Grade | Stage III-IV | T3-T4 | M0     | N1-3 |
| TCGA-DK-A3IL | >65 FEMALE  | High Grade | Stage III-IV | T3-T4 | M0     | N1-3 |
| TCGA-DK-A2HX | >65 FEMALE  | High Grade | Stage III-IV | T3-T4 | M0     | N1-3 |
| TCGA-DK-A1AF | >65 FEMALE  | High Grade | Stage III-IV | T3-T4 | M0     | N1-3 |
| TCGA-DK-A1A3 | <=65 MALE   | High Grade | Stage III-IV | T3-T4 | M0     | N1-3 |
| TCGA-G2-AA3D | <=65 MALE   | High Grade | Stage III-IV | T3-T4 | M0     | N1-3 |
| TCGA-DK-A3X2 | >65 MALE    | High Grade | Stage III-IV | T3-T4 | M0     | N1-3 |
| TCGA-DK-A3IK | >65 MALE    | High Grade | Stage III-IV | T3-T4 | M0     | N1-3 |
| TCGA-ZF-AA5H | <=65 FEMALE | High Grade | Stage III-IV | T3-T4 | M0     | N1-3 |
| TCGA-XF-A8HH | <=65 FEMALE | High Grade | Stage III-IV | T3-T4 | M0     | N1-3 |
| TCGA-DK-A1AD | >65 MALE    | High Grade | Stage III-IV | T3-T4 | M0     | N1-3 |
| TCGA-BT-A20Q | >65 MALE    | High Grade | Stage III-IV | T3-T4 | M0     | N1-3 |
| TCGA-CU-A72E | >65 MALE    | High Grade | Stage III-IV | T3-T4 | M0     | N1-3 |
| TCGA-BL-A13J | <=65 MALE   | High Grade | Stage III-IV | T3-T4 | M0     | N1-3 |

|              |      |        |            |              |       |        |      |
|--------------|------|--------|------------|--------------|-------|--------|------|
| TCGA-GV-A3QK | <=65 | FEMALE | High Grade | Stage III-IV | T3-T4 | M0     | N1-3 |
| TCGA-BT-A20V | <=65 | FEMALE | High Grade | Stage III-IV | T3-T4 | M0     | N1-3 |
| TCGA-DK-A1AB | >65  | FEMALE | High Grade | Stage III-IV | T3-T4 | M0     | N1-3 |
| TCGA-DK-A6B5 | <=65 | MALE   | High Grade | Stage III-IV | T3-T4 | M0     | N1-3 |
| TCGA-BT-A20X | <=65 | MALE   | High Grade | Stage III-IV | T3-T4 | M0     | N1-3 |
| TCGA-XF-AAN0 | >65  | MALE   | High Grade | Stage III-IV | T3-T4 | M0     | N1-3 |
| TCGA-C4-A0F7 | >65  | MALE   | High Grade | Stage III-IV | T3-T4 | M0     | N1-3 |
| TCGA-4Z-AA84 | <=65 | MALE   | High Grade | Stage III-IV | T3-T4 | M1     | N1-3 |
| TCGA-FD-A3SM | >65  | MALE   | High Grade | Stage III-IV | T3-T4 | M1     | N1-3 |
| TCGA-FD-A6TF | >65  | FEMALE | High Grade | Stage III-IV | T3-T4 | M1     | N1-3 |
| TCGA-FD-A3SL | <=65 | MALE   | High Grade | Stage III-IV | T3-T4 | M1     | N1-3 |
| TCGA-XF-A9SV | >65  | MALE   | High Grade | Stage III-IV | T3-T4 | M1     | N1-3 |
| TCGA-FD-A6TH | <=65 | MALE   | High Grade | Stage III-IV | T3-T4 | unknow | N1-3 |
| TCGA-GD-A2C5 | <=65 | FEMALE | High Grade | Stage III-IV | T3-T4 | unknow | N1-3 |
| TCGA-ZF-AA58 | <=65 | FEMALE | High Grade | Stage III-IV | T3-T4 | unknow | N1-3 |
| TCGA-ZF-A9RD | >65  | FEMALE | High Grade | Stage III-IV | T3-T4 | unknow | N1-3 |
| TCGA-XF-AAMZ | >65  | FEMALE | High Grade | Stage III-IV | T3-T4 | unknow | N1-3 |
| TCGA-FD-A6TE | <=65 | MALE   | High Grade | Stage III-IV | T3-T4 | unknow | N1-3 |
| TCGA-FD-A5C0 | <=65 | MALE   | High Grade | Stage III-IV | T3-T4 | unknow | N1-3 |
| TCGA-FD-A3SQ | <=65 | MALE   | High Grade | Stage III-IV | T3-T4 | unknow | N1-3 |
| TCGA-2F-A9KP | >65  | MALE   | High Grade | Stage III-IV | T3-T4 | unknow | N1-3 |
| TCGA-XF-A9SL | >65  | MALE   | High Grade | Stage III-IV | T3-T4 | unknow | N1-3 |
| TCGA-FD-A6TG | >65  | MALE   | High Grade | Stage III-IV | T3-T4 | unknow | N1-3 |
| TCGA-FD-A62O | >65  | MALE   | High Grade | Stage III-IV | T3-T4 | unknow | N1-3 |
| TCGA-UY-A9PF | >65  | MALE   | High Grade | Stage III-IV | T3-T4 | unknow | N1-3 |
| TCGA-XF-A8HC | >65  | MALE   | High Grade | Stage III-IV | T3-T4 | unknow | N1-3 |
| TCGA-CU-A0YO | >65  | MALE   | High Grade | Stage III-IV | T3-T4 | unknow | N1-3 |
| TCGA-XF-A9SY | <=65 | FEMALE | High Grade | Stage III-IV | T3-T4 | unknow | N1-3 |
| TCGA-XF-A9SX | <=65 | FEMALE | High Grade | Stage III-IV | T3-T4 | unknow | N1-3 |
| TCGA-XF-A9T3 | >65  | FEMALE | High Grade | Stage III-IV | T3-T4 | unknow | N1-3 |
| TCGA-XF-AAMT | >65  | FEMALE | High Grade | Stage III-IV | T3-T4 | unknow | N1-3 |
| TCGA-ZF-A9R9 | <=65 | MALE   | High Grade | Stage III-IV | T3-T4 | unknow | N1-3 |
| TCGA-FD-A6TA | <=65 | MALE   | High Grade | Stage III-IV | T3-T4 | unknow | N1-3 |
| TCGA-BT-A3PH | >65  | MALE   | High Grade | Stage III-IV | T3-T4 | unknow | N1-3 |
| TCGA-FT-A61P | >65  | MALE   | High Grade | Stage III-IV | T3-T4 | unknow | N1-3 |
| TCGA-XF-AAN3 | >65  | MALE   | High Grade | Stage III-IV | T3-T4 | unknow | N1-3 |
| TCGA-GV-A3QF | >65  | MALE   | High Grade | Stage III-IV | T3-T4 | unknow | N1-3 |
| TCGA-XF-A9SZ | >65  | MALE   | High Grade | Stage III-IV | T3-T4 | unknow | N1-3 |
| TCGA-GU-A767 | >65  | MALE   | High Grade | Stage III-IV | T3-T4 | unknow | N1-3 |
| TCGA-XF-A9SJ | >65  | MALE   | High Grade | Stage III-IV | T3-T4 | unknow | N1-3 |
| TCGA-XF-A9SW | >65  | MALE   | High Grade | Stage III-IV | T3-T4 | unknow | N1-3 |
| TCGA-ZF-AA4T | <=65 | MALE   | High Grade | Stage III-IV | T3-T4 | unknow | N1-3 |
| TCGA-XF-AAMF | >65  | MALE   | High Grade | Stage III-IV | T3-T4 | unknow | N1-3 |
| TCGA-GD-A3OP | >65  | FEMALE | High Grade | Stage III-IV | T3-T4 | unknow | N1-3 |



|              |      |        |            |              |        |        |        |
|--------------|------|--------|------------|--------------|--------|--------|--------|
| TCGA-FD-A3SR | >65  | MALE   | High Grade | Stage III-IV | T3-T4  | unknow | N1-3   |
| TCGA-GU-A42R | >65  | MALE   | High Grade | Stage III-IV | T3-T4  | unknow | N1-3   |
| TCGA-FD-A43U | >65  | MALE   | High Grade | Stage III-IV | T3-T4  | unknow | N1-3   |
| TCGA-GU-AATO | >65  | MALE   | High Grade | Stage III-IV | T3-T4  | unknow | N1-3   |
| TCGA-FJ-A3Z7 | >65  | MALE   | High Grade | Stage III-IV | T3-T4  | unknow | N1-3   |
| TCGA-LC-A66R | >65  | MALE   | High Grade | Stage III-IV | T3-T4  | unknow | N1-3   |
| TCGA-S5-A6DX | >65  | MALE   | High Grade | Stage III-IV | T3-T4  | unknow | N1-3   |
| TCGA-GU-A762 | >65  | MALE   | High Grade | Stage III-IV | T3-T4  | unknow | N1-3   |
| TCGA-E5-A4TZ | <=65 | MALE   | High Grade | Stage III-IV | T3-T4  | unknow | N1-3   |
| TCGA-DK-A2I2 | <=65 | FEMALE | High Grade | Stage III-IV | T3-T4  | M0     | N1-3   |
| TCGA-KQ-A41P | >65  | MALE   | High Grade | Stage III-IV | T3-T4  | M1     | N1-3   |
| TCGA-GV-A3QG | <=65 | MALE   | High Grade | Stage III-IV | T3-T4  | unknow | N1-3   |
| TCGA-E7-A7DV | <=65 | MALE   | High Grade | Stage III-IV | T3-T4  | unknow | N1-3   |
| TCGA-FD-A3SS | >65  | MALE   | High Grade | Stage III-IV | T3-T4  | unknow | N1-3   |
| TCGA-E7-A97Q | <=65 | FEMALE | High Grade | Stage III-IV | T3-T4  | unknow | N1-3   |
| TCGA-GV-A3JZ | <=65 | MALE   | High Grade | Stage III-IV | T3-T4  | unknow | N1-3   |
| TCGA-E7-A7PW | <=65 | MALE   | High Grade | Stage III-IV | T3-T4  | M0     | unknow |
| TCGA-4Z-AA7Q | >65  | MALE   | High Grade | Stage III-IV | T3-T4  | M0     | unknow |
| TCGA-ZF-A9RN | >65  | FEMALE | High Grade | Stage III-IV | T3-T4  | M0     | unknow |
| TCGA-ZF-A9R0 | >65  | MALE   | High Grade | Stage III-IV | T3-T4  | M0     | unknow |
| TCGA-ZF-AA54 | >65  | MALE   | High Grade | Stage III-IV | T3-T4  | unknow | unknow |
| TCGA-ZF-AA52 | >65  | MALE   | High Grade | Stage III-IV | T3-T4  | unknow | unknow |
| TCGA-FJ-A871 | <=65 | MALE   | High Grade | Stage III-IV | T3-T4  | unknow | unknow |
| TCGA-5N-A9KI | >65  | FEMALE | High Grade | Stage III-IV | T3-T4  | unknow | unknow |
| TCGA-KQ-A41S | >65  | FEMALE | High Grade | Stage III-IV | T3-T4  | unknow | unknow |
| TCGA-ZF-AA4U | >65  | MALE   | High Grade | Stage III-IV | T3-T4  | unknow | unknow |
| TCGA-G2-A2EJ | <=65 | FEMALE | High Grade | Stage I-II   | unknow | M0     | N0     |
| TCGA-G2-A2EC | <=65 | FEMALE | High Grade | Stage I-II   | unknow | M0     | N0     |
| TCGA-DK-AA76 | <=65 | FEMALE | High Grade | Stage I-II   | unknow | M0     | N0     |
| TCGA-DK-AA6P | >65  | FEMALE | High Grade | Stage I-II   | unknow | M0     | N0     |
| TCGA-G2-A2EF | <=65 | MALE   | High Grade | Stage I-II   | unknow | M0     | N0     |
| TCGA-G2-A2EK | <=65 | MALE   | High Grade | Stage I-II   | unknow | M0     | N0     |
| TCGA-DK-AA6T | <=65 | MALE   | High Grade | Stage I-II   | unknow | M0     | N0     |
| TCGA-DK-AA6X | <=65 | MALE   | High Grade | Stage I-II   | unknow | M0     | N0     |
| TCGA-BT-A42C | <=65 | MALE   | High Grade | Stage I-II   | unknow | M0     | N0     |
| TCGA-G2-A2EL | >65  | MALE   | High Grade | Stage I-II   | unknow | M0     | N0     |
| TCGA-E7-A3Y1 | <=65 | MALE   | Low Grade  | Stage I-II   | unknow | M0     | N0     |
| TCGA-DK-AA6U | <=65 | MALE   | unknow     | Stage I-II   | unknow | M0     | N0     |
| TCGA-ZF-A9R7 | >65  | FEMALE | High Grade | Stage I-II   | unknow | M0     | unknow |
| TCGA-DK-A3IV | <=65 | MALE   | High Grade | Stage I-II   | unknow | M0     | unknow |
| TCGA-GD-A3OS | <=65 | FEMALE | High Grade | Stage I-II   | unknow | unknow | unknow |
| TCGA-G2-A3IE | <=65 | MALE   | High Grade | Stage I-II   | unknow | unknow | unknow |
| TCGA-LT-A5Z6 | <=65 | MALE   | High Grade | Stage I-II   | unknow | unknow | unknow |
| TCGA-DK-A6B6 | <=65 | MALE   | High Grade | Stage I-II   | unknow | unknow | unknow |

|              |      |        |            |              |        |        |        |
|--------------|------|--------|------------|--------------|--------|--------|--------|
| TCGA-G2-A3IB | >65  | MALE   | High Grade | Stage I-II   | unknow | unknow | unknow |
| TCGA-GV-A3QH | >65  | MALE   | High Grade | Stage I-II   | unknow | unknow | unknow |
| TCGA-GV-A40E | >65  | MALE   | High Grade | Stage I-II   | unknow | unknow | unknow |
| TCGA-ZF-A9RE | >65  | FEMALE | High Grade | Stage I-II   | unknow | unknow | unknow |
| TCGA-YC-A89H | >65  | FEMALE | High Grade | Stage I-II   | unknow | unknow | unknow |
| TCGA-ZF-A9RL | <=65 | MALE   | High Grade | Stage I-II   | unknow | unknow | unknow |
| TCGA-G2-A3VY | >65  | MALE   | High Grade | Stage I-II   | unknow | unknow | unknow |
| TCGA-FJ-A3ZF | >65  | MALE   | High Grade | Stage III-IV | unknow | M0     | N0     |
| TCGA-UY-A78L | <=65 | MALE   | High Grade | Stage III-IV | unknow | unknow | N1-3   |
| TCGA-UY-A78K | <=65 | MALE   | High Grade | Stage III-IV | unknow | unknow | N1-3   |
| TCGA-FJ-A3ZE | <=65 | MALE   | High Grade | Stage III-IV | unknow | M1     | N1-3   |
| TCGA-H4-A2HQ | <=65 | FEMALE | High Grade | Stage III-IV | unknow | M1     | unknow |
| TCGA-YC-A9TC | >65  | MALE   | High Grade | Stage III-IV | unknow | M1     | unknow |
| TCGA-FJ-A3Z9 | >65  | MALE   | High Grade | unknow       | unknow | M0     | N0     |
