# Supplementary material for: Ferroptosis‐Related Long Noncoding RNAs Have Excellent Predictive Ability for Multiomic Characteristics of Bladder Cancer
Source: Hindawi journal article supplement (doi:10.1155/2022/9316847), 2022-01-01
Supplement: f1 [file 9316847.f1.zip]

ID TCGA-GD-A3OP-11A-11R-A220-07 TCGA-BT-A20Q-11A-11R-A14Y-07 TCGA-GD-A2C5-11A-11R-A180-07 TCGA-BT-A20N-11A-11R-A14Y-07 TCGA-BT-A2LB-11A-11R-A18C-07 TCGA-GC-A3BM-11A-11R-A22U-07 TCGA-CU-A0YR-11A-13R-A10U-07 TCGA-GC-A3WC-11A-11R-A22U-07 TCGA-CU-A0YN-11A-11R-A10U-07 TCGA-BT-A20R-11A-11R-A16R-07 TCGA-BT-A20U-11A-11R-A14Y-07 TCGA-BT-A20W-11A-11R-A14Y-07 TCGA-GD-A3OQ-11A-21R-A220-07 TCGA-K4-A5RI-11A-11R-A28M-07 TCGA-BL-A13J-11A-13R-A10U-07 TCGA-K4-A54R-11A-11R-A26T-07 TCGA-K4-A3WV-11A-21R-A22U-07 TCGA-GC-A6I3-11A-11R-A31N-07 TCGA-BT-A2LA-11A-11R-A18C-07 TCGA-CF-A47X-01A-31R-A23W-07 TCGA-ZF-AA51-01A-21R-A39I-07 TCGA-BL-A0C8-01A-11R-A10U-07 TCGA-BT-A42C-01A-11R-A23N-07 TCGA-G2-A3IB-01A-11R-A20F-07 TCGA-2F-A9KP-01A-11R-A38B-07 TCGA-DK-A3IT-01A-31R-A20F-07 TCGA-FD-A43P-01A-31R-A23W-07 TCGA-DK-A3IV-01A-22R-A21D-07 TCGA-2F-A9KW-01A-11R-A38B-07 TCGA-GU-A762-01A-11R-A33J-07 TCGA-XF-AAME-01A-12R-A42T-07 TCGA-XF-AAN0-01A-11R-A42T-07 TCGA-CF-A47W-01A-11R-A23W-07 TCGA-GC-A3I6-01A-11R-A20F-07 TCGA-FD-A6TA-01A-12R-A33J-07 TCGA-DK-A1A7-01A-11R-A13Y-07 TCGA-FD-A3SR-01A-11R-A22U-07 TCGA-GU-AATP-01A-11R-A39I-07 TCGA-DK-AA6X-01A-12R-A42T-07 TCGA-XF-A9T3-01A-11R-A42T-07 TCGA-PQ-A6FN-01A-11R-A31N-07 TCGA-DK-A3WW-01A-22R-A23N-07 TCGA-XF-AAMY-01A-11R-A42T-07 TCGA-K4-A3WS-01A-11R-A22U-07 TCGA-UY-A9PA-01A-11R-A38B-07 TCGA-G2-AA3F-01A-12R-A42T-07 TCGA-FJ-A871-01A-11R-A352-07 TCGA-ZF-A9RN-01A-11R-A42T-07 TCGA-GC-A3RB-01A-12R-A220-07 TCGA-UY-A9PF-01A-11R-A38B-07 TCGA-YC-A89H-01A-11R-A36F-07 TCGA-XF-AAMQ-01A-11R-A42T-07 TCGA-CF-A1HR-01A-11R-A13Y-07 TCGA-E7-A3X6-01A-12R-A22U-07 TCGA-DK-A6AW-01A-11R-A30C-07 TCGA-GC-A3BM-01A-11R-A22U-07 TCGA-GV-A6ZA-01A-12R-A33J-07 TCGA-G2-A2EJ-01A-11R-A180-07 TCGA-FD-A43N-01A-11R-A23W-07 TCGA-UY-A8OD-01A-11R-A36F-07 TCGA-2F-A9KT-01A-11R-A38B-07 TCGA-BT-A20Q-01A-11R-A14Y-07 TCGA-CU-A0YR-01A-12R-A10U-07 TCGA-SY-A9G5-01A-11R-A38B-07 TCGA-4Z-AA84-01A-11R-A39I-07 TCGA-4Z-AA7Q-01A-11R-A39I-07 TCGA-FD-A5BT-01A-11R-A26T-07 TCGA-CF-A27C-01A-11R-A16R-07 TCGA-E7-A6MF-01A-12R-A32O-07 TCGA-FT-A61P-01A-11R-A30C-07 TCGA-DK-AA77-01A-11R-A39I-07 TCGA-ZF-AA5N-01A-11R-A42T-07 TCGA-DK-AA6U-01A-11R-A39I-07 TCGA-BT-A20O-01A-21R-A14Y-07 TCGA-GD-A3OS-01A-12R-A220-07 TCGA-XF-A9SZ-01A-11R-A39I-07 TCGA-4Z-AA82-01A-11R-A39I-07 TCGA-DK-AA76-01A-11R-A39I-07 TCGA-DK-A3IL-01A-11R-A20F-07 TCGA-E7-A678-01A-11R-A30C-07 TCGA-ZF-A9R1-01A-11R-A39I-07 TCGA-XF-A9SH-01A-11R-A39I-07 TCGA-FD-A5BU-01A-31R-A26T-07 TCGA-C4-A0F7-01A-11R-A084-07 TCGA-C4-A0F0-01A-12R-A10U-07 TCGA-FD-A3N5-01A-11R-A21D-07 TCGA-ZF-AA5H-01A-11R-A39I-07 TCGA-DK-A3WX-01A-22R-A22U-07 TCGA-YF-AA3L-01A-11R-A38B-07 TCGA-BT-A2LA-01A-11R-A18C-07 TCGA-4Z-AA87-01A-11R-A39I-07 TCGA-BT-A2LB-01A-11R-A18C-07 TCGA-XF-A8HB-01A-11R-A36F-07 TCGA-DK-A2I6-01A-12R-A18C-07 TCGA-ZF-AA4X-01A-11R-A38B-07 TCGA-BT-A20P-01A-11R-A14Y-07 TCGA-BT-A20W-01A-21R-A14Y-07 TCGA-FD-A5BX-01A-11R-A26T-07 TCGA-BL-A13J-01A-11R-A10U-07 TCGA-CF-A8HX-01A-11R-A36F-07 TCGA-PQ-A6FI-01A-11R-A31N-07 TCGA-FJ-A3Z7-01A-12R-A23N-07 TCGA-E7-A7PW-01A-11R-A352-07 TCGA-4Z-AA7S-01A-

11R-A39I-07 TCGA-CF-A3MH-01A-11R-A20F-07 TCGA-DK-A6B2-01A-11R-A30C-07  
TCGA-4Z-AA86-01A-11R-A39I-07 TCGA-BL-A0C8-01B-04R-A277-07 TCGA-5N-  
A9KI-01A-31R-A42T-07 TCGA-GU-AATO-01A-11R-A39I-07 TCGA-CF-A9FH-01A-  
11R-A38B-07TCGA-FD-A6TG-01A-11R-A32O-07 TCGA-4Z-AA7O-01A-31R-A39I-07  
TCGA-GV-A3QI-01A-11R-A220-07 TCGA-DK-A6AV-01A-12R-A30C-07 TCGA-DK-  
A1A3-01A-11R-A13Y-07 TCGA-GD-A6C6-01A-21R-A31N-07TCGA-GC-A3RD-01A-  
12R-A22U-07 TCGA-BT-A20R-01A-12R-A16R-07 TCGA-XF-A9T0-01A-11R-A39I-07  
TCGA-YF-AA3M-01A-11R-A42T-07 TCGA-4Z-AA7Y-01A-11R-A39I-07 TCGA-FD-  
A62O-01A-11R-A30C-07 TCGA-BL-A3JM-01A-12R-A21D-07 TCGA-FJ-A3ZF-01A-11R-  
A23N-07TCGA-CU-A0YO-01A-11R-A10U-07TCGA-CF-A5UA-01A-11R-A28M-07TCGA-  
K4-AAQO-01A-11R-A38B-07 TCGA-XF-AAMJ-01A-11R-A42T-07 TCGA-GU-A763-  
01A-11R-A32O-07 TCGA-G2-A2EC-01A-11R-A180-07 TCGA-FD-A3B7-01A-31R-  
A20F-07 TCGA-FD-A5C0-01A-11R-A28M-07 TCGA-FD-A5BS-01A-21R-A26T-07 TCGA-  
CU-A0YN-01A-21R-A10U-07 TCGA-FD-A5BZ-01A-11R-A28M-07 TCGA-UY-A9PE-  
01A-11R-A38B-07 TCGA-GV-A40E-01A-12R-A23N-07 TCGA-BT-A2LD-01A-12R-  
A20F-07 TCGA-UY-A9PD-01A-11R-A38B-07 TCGA-G2-AA3B-01A-11R-A39I-07 TCGA-  
K4-A54R-01A-11R-A26T-07 TCGA-DK-A1AA-01A-11R-A13Y-07 TCGA-CU-A5W6-  
01A-11R-A28M-07 TCGA-DK-AA6R-01A-11R-A42T-07 TCGA-BT-A3PH-01A-11R-  
A220-07 TCGA-BL-A13I-01B-04R-A277-07 TCGA-CF-A3MF-01A-12R-A21D-07 TCGA-  
CF-A47T-01A-11R-A23W-07 TCGA-YC-A8S6-01A-31R-A38B-07 TCGA-DK-A3IS-01A-  
21R-A21D-07 TCGA-XF-A9SJ-01A-11R-A39I-07 TCGA-DK-AA6T-01A-11R-A39I-07  
TCGA-BT-A20N-01A-11R-A14Y-07 TCGA-C4-A0F6-01A-11R-A10U-07 TCGA-CF-  
A7I0-01A-22R-A352-07 TCGA-FD-A3B6-01A-21R-A20F-07 TCGA-GC-A3YS-01A-  
11R-A23N-07 TCGA-XF-A9T2-01A-11R-A42T-07 TCGA-UY-A78O-01A-12R-A33J-07  
TCGA-GC-A3OO-01A-11R-A22U-07 TCGA-E7-A6ME-01A-22R-A32O-07 TCGA-  
XF-AAN5-01A-11R-A42T-07 TCGA-FD-A3SN-01A-12R-A22U-07 TCGA-ZF-A9R2-01A-  
11R-A39I-07 TCGA-ZF-AA4T-01A-11R-A38B-07 TCGA-E7-A4IJ-01A-31R-A26T-07  
TCGA-FD-A6TE-01A-12R-A33J-07 TCGA-H4-A2HO-01A-11R-A180-07 TCGA-FD-  
A6TB-01A-12R-A33J-07 TCGA-XF-AAN3-01A-11R-A42T-07 TCGA-XF-AAMH-01A-  
11R-A42T-07TCGA-FD-A3B8-01A-31R-A20F-07 TCGA-XF-A9SY-01A-21R-A42T-07  
TCGA-CF-A9FF-01A-11R-A38B-07 TCGA-XF-A9ST-01A-11R-A42T-07 TCGA-DK-  
A6B5-01A-11R-A31N-07 TCGA-GC-A3RC-01A-11R-A22U-07 TCGA-GV-A3QK-01B-  
11R-A23N-07 TCGA-GU-A764-01A-11R-A352-07 TCGA-GU-A42R-01A-11R-A23N-  
07 TCGA-DK-A6B6-01A-11R-A30C-07 TCGA-R3-A69X-01A-22R-A30C-07 TCGA-5N-  
A9KM-01A-11R-A42T-07 TCGA-FD-A6TF-01A-52R-A32O-07 TCGA-XF-AAMR-01A-  
31R-A42T-07TCGA-XF-A8HF-01A-11R-A36F-07 TCGA-ZF-AA4U-01A-11R-A38B-07  
TCGA-DK-A3IQ-01A-31R-A32Y-07 TCGA-E7-A4XJ-01A-11R-A26T-07 TCGA-XF-  
A9T6-01A-11R-A42T-07 TCGA-4Z-AA7M-01A-11R-A39I-07 TCGA-ZF-AA56-01A-  
31R-A39I-07 TCGA-XF-A8HH-01A-11R-A38B-07 TCGA-C4-A0EZ-01A-21R-A24X-07  
TCGA-FD-A62P-01A-32R-A30C-07 TCGA-CF-A47V-01A-11R-A23W-07 TCGA-XF-  
A9SI-01A-11R-A39I-07 TCGA-GU-A42Q-01A-11R-A23W-07 TCGA-BT-A42F-01A-  
11R-A23W-07 TCGA-ZF-A9RF-01A-11R-A38B-07 TCGA-KQ-A41N-01A-11R-A33J-  
07 TCGA-GD-A3OQ-01A-32R-A220-07 TCGA-BT-A20U-01A-11R-A14Y-07 TCGA-  
XF-A9SW-01A-11R-A42T-07 TCGA-FD-A3B3-01A-12R-A206-07 TCGA-ZF-A9RC-01A-

11R-A38B-07TCGA-E7-A6MD-01A-41R-A352-07 TCGA-E5-A4TZ-01A-11R-A31N-07  
TCGA-ZF-A9R4-01A-11R-A38B-07 TCGA-GV-A3QH-01A-11R-A220-07TCGA-BT-  
A0YX-01A-11R-A10U-07 TCGA-FT-A3EE-01A-11R-A206-07 TCGA-ZF-A9RL-01A-11R-  
A38B-07 TCGA-ZF-A9R9-01A-11R-A38B-07 TCGA-ZF-A9RE-01A-11R-A38B-07 TCGA-  
DK-A6B1-01A-12R-A30C-07 TCGA-CF-A5U8-01A-11R-A28M-07 TCGA-XF-AAMW-  
01A-11R-A42T-07 TCGA-BT-A3PJ-01A-21R-A220-07 TCGA-ZF-A9R7-01A-11R-  
A38B-07 TCGA-FD-A3SO-01A-11R-A22U-07 TCGA-E7-A97P-01A-11R-A38B-07 TCGA-  
GU-A767-01A-11R-A32O-07 TCGA-4Z-AA81-01A-11R-A39I-07 TCGA-2F-A9KQ-  
01A-11R-A38B-07 TCGA-SY-A9G0-01A-12R-A38B-07 TCGA-GV-A40G-01A-11R-  
A23N-07TCGA-FD-A43Y-01A-21R-A26T-07 TCGA-S5-AA26-01A-11R-A38B-07 TCGA-  
BT-A42E-01A-11R-A23W-07 TCGA-FD-A43X-01A-11R-A23W-07 TCGA-ZF-AA4R-  
01A-11R-A38B-07 TCGA-BT-A20T-01A-11R-A14Y-07 TCGA-E7-A7DU-01A-11R-  
A32O-07 TCGA-DK-A3WY-01A-11R-A22U-07 TCGA-G2-A2EF-01A-12R-A18C-07  
TCGA-BT-A20V-01A-11R-A14Y-07 TCGA-K4-A3WV-01A-11R-A22U-07TCGA-GU-  
AATQ-01A-11R-A39I-07 TCGA-G2-A3VY-01A-11R-A22U-07 TCGA-XF-AAN8-01A-  
11R-A42T-07TCGA-CU-A3QU-01A-11R-A22U-07 TCGA-GD-A3OP-01A-21R-A220-  
07 TCGA-KQ-A41P-01A-12R-A33J-07 TCGA-UY-A9PH-01A-11R-A38B-07 TCGA-FD-  
A5BY-01A-31R-A28M-07 TCGA-K4-A3WU-01B-11R-A23N-07TCGA-FD-A3SJ-01A-12R-  
A22U-07TCGA-FD-A3B5-01A-11R-A20F-07 TCGA-GC-A6I3-01A-11R-A31N-07 TCGA-  
4Z-AA80-01A-11R-A39I-07 TCGA-G2-A3IE-01A-11R-A20F-07 TCGA-ZF-A9R0-01A-  
11R-A38B-07TCGA-FD-A43S-01A-21R-A23W-07 TCGA-XF-A8HG-01A-11R-A36F-07  
TCGA-K4-A83P-01A-11R-A352-07 TCGA-GD-A2C5-01A-12R-A180-07 TCGA-XF-  
AAMX-01A-11R-A42T-07 TCGA-DK-A1AE-01A-11R-A13Y-07 TCGA-FJ-A3ZE-01A-11R-  
A23N-07TCGA-DK-A2I1-01A-11R-A180-07 TCGA-DK-A6B0-01A-11R-A31N-07 TCGA-  
FD-A5BR-01A-11R-A26T-07 TCGA-KQ-A41Q-01A-11R-A33J-07 TCGA-DK-A1AF-  
01A-11R-A13Y-07 TCGA-LT-A5Z6-01A-11R-A28M-07 TCGA-GC-A4ZW-01A-11R-  
A26T-07 TCGA-K4-A4AB-01B-12R-A28M-07 TCGA-DK-AA74-01A-11R-A39I-07 TCGA-  
G2-A2EO-01A-11R-A180-07 TCGA-DK-A1AG-01A-11R-A13Y-07 TCGA-GV-A3JZ-01A-  
11R-A21D-07 TCGA-XF-A9SV-01A-21R-A42T-07 TCGA-UY-A78K-01A-11R-A33J-07  
TCGA-FD-A6TH-01A-11R-A32O-07 TCGA-DK-AA6W-01A-12R-A39I-07 TCGA-CF-  
A3MG-01A-11R-A20F-07 TCGA-DK-A3X1-01A-12R-A22U-07 TCGA-DK-A1A6-01A-  
11R-A13Y-07TCGA-XF-AAMG-01A-11R-A42T-07TCGA-E7-A541-01A-11R-A26T-07  
TCGA-XF-A8HE-01A-11R-A36F-07 TCGA-DK-AA6Q-01A-11R-A39I-07 TCGA-UY-  
A78N-01A-12R-A33J-07 TCGA-DK-AA75-01A-11R-A39I-07 TCGA-ZF-AA5P-01A-  
11R-A39I-07 TCGA-GC-A3WC-01A-31R-A22U-07 TCGA-K4-A4AC-01A-21R-A26T-07  
TCGA-FD-A3SL-01A-21R-A22U-07 TCGA-K4-A5RH-01A-11R-A30C-07 TCGA-FD-  
A5C1-01A-11R-A28M-07 TCGA-BL-A13J-01A-11R-A277-07 TCGA-XF-AAN7-01A-  
11R-A42T-07TCGA-2F-A9KO-01A-11R-A38B-07 TCGA-DK-A3IM-01A-11R-A20F-07  
TCGA-FD-A3SS-01A-12R-A22U-07 TCGA-4Z-AA7N-01A-11R-A39I-07 TCGA-HQ-  
A2OE-01A-11R-A206-07 TCGA-UY-A8OC-01A-11R-A36F-07 TCGA-GV-A3JV-01A-  
11R-A220-07TCGA-XF-A9T8-01A-11R-A39I-07 TCGA-KQ-A41S-01A-12R-A33J-07  
TCGA-CU-A3YL-01A-11R-A22U-07 TCGA-E7-A7XN-01A-11R-A352-07 TCGA-DK-  
A2HX-01A-12R-A18C-07 TCGA-CF-A8HY-01A-11R-A36F-07 TCGA-4Z-AA7W-01A-  
11R-A39I-07 TCGA-FD-A43U-01A-11R-A23W-07TCGA-BL-A0C8-01A-11R-A277-07

TCGA-BT-A0S7-01A-11R-A10U-07 TCGA-ZF-A9R3-01A-11R-A38B-07 TCGA-4Z-AA89-01A-11R-A39I-07 TCGA-GU-A42P-01A-11R-A23W-07 TCGA-FD-A3NA-01A-11R-A21D-07 TCGA-XF-A9SL-01A-11R-A39I-07 TCGA-XF-AAN2-01A-11R-A42T-07 TCGA-ZF-AA54-01A-11R-A39I-07 TCGA-GU-A766-01A-11R-A32O-07 TCGA-FD-A6TD-01A-51R-A33J-07 TCGA-FD-A3B4-01A-12R-A206-07 TCGA-DK-A1AB-01A-11R-A13Y-07 TCGA-BT-A20X-01A-11R-A16R-07 TCGA-GV-A3JW-01A-11R-A20F-07 TCGA-UY-A9PB-01A-11R-A38B-07 TCGA-FD-A6TI-01A-11R-A32O-07 TCGA-XF-AAML-01A-11R-A42T-07 TCGA-ZF-AA58-01A-12R-A42T-07 TCGA-FD-A3SP-01A-31R-A22U-07 TCGA-E7-A97Q-01A-11R-A38B-07 TCGA-YC-A9TC-01A-22R-A39I-07 TCGA-GV-A3QG-01A-11R-A220-07 TCGA-K4-A6FZ-01A-11R-A31N-07 TCGA-KQ-A41R-01A-21R-A352-07 TCGA-DK-AA6M-01A-11R-A39I-07 TCGA-ZF-AA52-01A-12R-A39I-07 TCGA-K4-A5RJ-01A-11R-A28M-07 TCGA-HQ-A5ND-01A-11R-A26T-07 TCGA-BT-A3PK-01A-21R-A220-07 TCGA-FD-A3N6-01A-11R-A21D-07 TCGA-UY-A78P-01A-12R-A36F-07 TCGA-CF-A9FL-01A-11R-A38B-07 TCGA-CF-A9FM-01A-11R-A38B-07 TCGA-ZF-A9RD-01A-11R-A42T-07 TCGA-G2-AA3D-01A-11R-A39I-07 TCGA-DK-A2I2-01A-11R-A180-07 TCGA-FD-A62S-01A-11R-A30C-07 TCGA-MV-A51V-01A-11R-A26T-07 TCGA-E5-A2PC-01A-11R-A206-07 TCGA-DK-A3X2-01A-11R-A22U-07 TCGA-GD-A76B-01A-11R-A32O-07 TCGA-GC-A6I1-01A-12R-A31N-07 TCGA-BL-A13J-01B-04R-A277-07 TCGA-XF-A9SK-01A-11R-A42T-07 TCGA-DK-A1AD-01A-11R-A13Y-07 TCGA-K4-A5RI-01A-11R-A28M-07 TCGA-FD-A3SQ-01A-21R-A22U-07 TCGA-GV-A3QF-01A-31R-A22U-07 TCGA-E7-A7DV-01A-11R-A33J-07 TCGA-XF-AAN1-01A-31R-A42T-07 TCGA-DK-AA6P-01A-11R-A39I-07 TCGA-CF-A47Y-01A-11R-A23W-07 TCGA-CF-A3MI-01A-11R-A20F-07 TCGA-G2-A2EL-01A-12R-A18C-07 TCGA-XF-AAMZ-01A-11R-A42T-07 TCGA-DK-AA6L-01A-11R-A39I-07 TCGA-XF-A9T4-01A-11R-A39I-07 TCGA-K4-A6MB-01A-11R-A31N-07 TCGA-UY-A8OB-01A-12R-A42T-07 TCGA-ZF-A9R5-01A-12R-A42T-07 TCGA-CU-A3KJ-01A-11R-A21D-07 TCGA-DK-AA6S-01A-21R-A39I-07 TCGA-E7-A85H-01A-11R-A352-07 TCGA-G2-AA3C-01A-21R-A39I-07 TCGA-E7-A8O8-01A-11R-A36F-07 TCGA-XF-A9SM-01A-11R-A42T-07 TCGA-DK-A3IN-01A-11R-A20F-07 TCGA-XF-A8HC-01A-11R-A36F-07 TCGA-ZF-AA4W-01A-12R-A38B-07 TCGA-LC-A66R-01A-41R-A30C-07 TCGA-E7-A8O7-01A-11R-A36F-07 TCGA-LT-A8JT-01A-11R-A36F-07 TCGA-FJ-A3Z9-01A-11R-A26T-07 TCGA-DK-A1AC-01A-11R-A13Y-07 TCGA-C4-A0F1-01A-11R-A034-07 TCGA-G2-A2ES-01A-11R-A180-07 TCGA-XF-AAN4-01A-11R-A42T-07 TCGA-4Z-AA83-01A-11R-A39I-07 TCGA-E7-A5KE-01A-11R-A28M-07 TCGA-ZF-AA4V-01A-11R-A38B-07 TCGA-ZF-AA53-01A-11R-A39I-07 TCGA-ZF-A9RM-01A-11R-A38B-07 TCGA-BL-A13I-01A-11R-A13Y-07 TCGA-CU-A72E-01A-12R-A33J-07 TCGA-2F-A9KR-01A-11R-A38B-07 TCGA-E5-A4U1-01A-11R-A31N-07 TCGA-E7-A3Y1-01A-11R-A22U-07 TCGA-FD-A6TC-01A-21R-A33J-07 TCGA-FD-A5BV-01A-11R-A26T-07 TCGA-DK-A2I4-01A-11R-A21D-07 TCGA-UY-A78M-01A-21R-A352-07 TCGA-4Z-AA7R-01A-11R-A39I-07 TCGA-E7-A519-01A-11R-A26T-07 TCGA-DK-A3IU-01A-11R-A20F-07 TCGA-FD-A3SM-01A-11R-A22U-07 TCGA-BL-A5ZZ-01A-31R-A30C-07 TCGA-FD-A62N-01A-11R-A30C-07 TCGA-BT-A20J-01A-11R-A14Y-07 TCGA-DK-AA71-01A-31R-A39I-07 TCGA-KQ-A41O-01A-12R-A352-07 TCGA-BL-A13I-01A-11R-A277-07 TCGA-E7-A677-01A-11R-A30C-07 TCGA-DK-A1A5-01A-

11R-A13Y-07TCGA-HQ-A5NE-01A-12R-A28M-07 TCGA-XF-AAMT-01A-11R-A42T-  
07 TCGA-XF-A9SU-01A-31R-A39I-07 TCGA-CF-A47S-01A-11R-A23W-07 TCGA-FD-  
A6TK-01A-42R-A33J-07 TCGA-E7-A5KF-01A-11R-A28M-07 TCGA-UY-A78L-01A-  
12R-A33J-07 TCGA-S5-A6DX-01A-11R-A31N-07 TCGA-XF-A8HI-01A-11R-A38B-07  
TCGA-XF-A9T5-01A-11R-A42T-07 TCGA-XF-A9SX-01A-21R-A39I-07 TCGA-G2-  
A2EK-01A-22R-A18C-07 TCGA-XF-A8HD-01A-11R-A36F-07 TCGA-GV-A3JX-01A-  
11R-A20F-07 TCGA-H4-A2HQ-01A-11R-A180-07 TCGA-XF-A9SP-01A-11R-A39I-07  
TCGA-DK-A3IK-01A-32R-A21D-07

ACSL4 4.96011610.988618.21341812.283934.8114815.33308711.777687.586674  
8.27264117.008783.40013316.8781110.2260914.277679.2353789.9828936.638522  
5.4562515.03115712.7138213.0140118.2123 4.5595613.83911 6.4686162.906341  
10.702022.0873767.7201338.66811211.657252.4904812.01773410.6234112.01361  
4.9389733.8767394.4298996.5800698.0333933.42477812.939265.7671939.413828  
9.28629555.350826.0471142.9495496.04303911.578976.02980811.660794.794883  
5.1242413.6306413.3305138.9575167.5694928.7711845.5361795.1959837.150073  
9.5443034.11317124.839822.1077573.34917 3.0474935.70834310.869285.361841  
1.07669413.7183923.7746417.368852.8730534.88651717.769371.8673612.088469  
10.349274.3312526.9440557.81119 36.162645.5325189.69942618.682212.02062  
3.43043616.035065.0551265.2750552.5379929.0615394.88926318.568049.618053  
3.2068151.5213265.1708669.4172693.39669 2.9596673.97646 10.8353913.91591  
30.053064.5927353.58121 5.06339 2.9699821.6729479.6841577.14224 4.378202  
0.6586598 14.3350612.216966.5790914.3802159.0919016.9260325.661194  
19.081898.9666184.1021487.26208211.1549 1.4639818.46027318.435513.951471  
8.54354 7.5240246.3999948.5468026.1816122.14927914.075 9.5797133.222954  
6.01816 3.9881595.0741381.52891460.671022.6012143.18882220.573684.472761  
4.1618264.3059952.0522644.5044087.57211410.341187.1063864.9646263.358784  
11.3978913.6334811.0482 2.7347166.12702510.1729114.155086.8237498.40105  
5.9406854.6055071.81837218.4114417.799344.8581693.9665942.7981687.091415  
9.0011865.50204 4.87210212.598056.4322489.4711925.6262888.7144232.854046  
4.1176456.9764 3.4504183.5203584.50257112.1254617.516859.7031913.03749  
6.15029610.240364.2152423.37182 28.424280.7089679 7.0167554.777935  
8.3216738.1032776.39685716.854630.9416815 13.7785614.071544.205971  
8.8855023.2696726.5003537.63702516.168154.2054 21.2263812.577352.931629  
3.39474212.857892.69034 2.0418323.38626 10.0644555.673716.4271012.051893  
5.3137224.23991811.664493.5250594.2973868.52716 19.840595.3847671.578953  
4.81849513.4431227.9461913.9700911.7697611.0975310.928675.38484813.38866  
11.031263.3771414.6622448.2414457.2450444.9701155.55084518.8643315.84903  
4.2530413.7330756.7119211.07997428.335475.0456546.69181916.9894953.99914  
6.4533934.64926710.550157.5345955.26905 9.52779611.791794.5499533.202199  
2.9488833.7186432.98813415.445096.18688618.4253 7.3272845.2541647.179378  
4.0083845.45229614.890828.9978619.51580715.6510817.872328.0171187.243288  
14.718318.3238844.0452921.7222926.1768225.73807612.6579213.803655.212307  
6.67663 10.4033110.160846.5717082.4255742.3354774.33871237.229653.423256  
4.2771465.1321393.19545523.623385.1809395.12091212.719896.8452478.186667

19.070549.7609224.99390218.3412611.876546.79434410.6717522.4677311.00604  
9.27178112.5088 12.7567113.5215313.010738.3415015.08176431.9862112.41863  
9.70267 5.8712878.09222 3.86287811.291729.8174757.96335710.684378.654767  
6.2063074.8757663.80425529.507479.29513810.976716.92989916.299939.303006  
6.61238861.1314421.386177.64719816.642132.9764476.3531556.7047965.987592  
4.64440915.401415.6867987.4105995.2815743.5067237.43694 3.21019 13.5659  
2.51474110.0171813.870723.7604692.9762998.66146 11.737944.6099984.036456  
6.6786363.71208612.7520615.7996111.074697.9362496.2473347.95554824.27219  
27.115731.6139015.6201524.5353131.9037993.9838368.90293818.4361 1.915851  
10.670051.4940346.1487925.19386324.1248612.859116.41013922.4115 2.548996  
35.5045525.3298511.946869.78283315.762964.4884075.60495412.050023.369367  
11.167282.6163546.6244864.6801517.6292528.47472227.8277210.030645.271889  
3.2217378.394265

AKR1C1 1.7598841.4987627.8509941.2466851.90982 8.1356073.0198592.274693  
2.9829433.26620544.854437.43323 17.670989.1522272.61798417.625528.84323  
10.0471717.161885.8587842.3946241.24667913.76633138.869 0.8329560.4359824  
1.2144635.4777640.2561038 0.2836844 4.5150360.7770971 6.6220121.39239  
2.7214632.1179941.2091121.0342334.2852980.8383302 4.0024780.336755  
1.0439932.0334492.59037 1.8160232.0893640.1011073 38.395340.7509624  
10.842324.5684012.6114311.2188590.7959650.5618794 4.1252331.054408  
4.3860390.9323422 1.68774411.804192.9434040.4001823 0.9503476  
0.6061148 0.7077161 1.7772230.7228348 0.5995931.50487915.34114  
1.254508100.71881.9342070.7473850.1761461 4.0861431.0541623.400347  
52.99395108.398559.634511.3636212.1582462.8310580.1212414.0042633.18048  
0.1278299 0.3857079 2.7868868.1007660.3797551 10.0455212.78897  
1.5847370.3062329 0.7937153 1.6260842.1316460.1670486 3.39575  
16.152134.3352033.6008470.4411281 5.2912612.3741870.3462519 5.789146  
0.9552308 1.20452217.776380.7404635 0.19508310.129037.29657 6.604586  
1.0970030.8592462 14.251453.1836140.4224174 0.5040465 1.212663  
4.9247726.40707813.2263112.102248.7166250.3966203 0.4227928 0.6217028  
0.5616301 2.5501334.0962540.5325827 0.1311127 3.76758821.04679  
3.2028373.94459912.614341.7892030.1554693 90.349441.4411644.279428  
25.871571.0820910.6758185 0.6346392 42.201118.28393 2.67281 0.04254656  
3.6433770.4397728 27.266320.7876952 1.18677111.934630.0779673  
9.37525115.100681.3920727.21054723.958513.213249193.93450.8261638  
0.5101258 0.2594341 6.8243390.1156798 1.5109370.9271978 4.061909  
0.8351534 14.737891.74428524.1177951.556413.1953 6.1790653.376727  
1.2592780.5184627 0.7403631 3.9862262.1225 25.537541.1090550.08989661  
0.5979242 2.73452 1.236352220.49681.66474 0.3765623.56201318.63607  
146.95161.5144050.6120789 1.1754859.9237280.3366510.6918766 0.7533029  
132.78940.6394731 8.79343513.270218.7007671.0988984.9739842.574923  
0.7369221 6.5376071.0382090.9899506 10.025550.01439534 1.720127  
2.0172820.51552 36.7122 5.85828 0.5081694 2.0590562.8816572.300224  
2.5081010.9034048 0.1054396 0.7868216 4.873625209.92432.762561

7.6267170.3730743 2.6862042.6609652.0841432.0031920.7200587 1.367622  
0.9482096 4.0523096.13395522.882462.48053 7.4556761.3486772.272528  
2.0279252.338775228.25620.3108905 0.5532582 4.2088619.1501631.784947  
2.1489950.9910542 0.05937302 10.781546.25184718.009771.1778430.2068246  
20.139861.2638680.8273573 2.6064726.08799112.925740.4090951 0.6898815  
2.1712830.8720971 216.19351.1148482.5859332.69345 309.514 19.4654  
0.8719524 0.2059262 0.4487691 1.25223510.5045869.665661.491619  
0.8517113 11.155245.8266593.55525443.749630.6174162 1.9165982.051062  
0.6263844 0.5275127 2.5256540.1979602 0.9109434 1.7422250.9804977  
8.4524064.0791890.5411588 21.051341.7647540.2575358 0.9597055  
0.4115421.8370380.64822 4.1463 2.35181132.803070.2474463 22.09306  
2.1307680.1526046 0.2709952 0.8250985 14.0309 1.36678211.53854  
1.6724761.18820224.231829.84602910.905160.08124092 64.1815712.11075  
0.8591775 20.2839530.095452.5221850.2218034 0.2670905 0.5373328  
100.41850.1435087 1.9470383.2351126.38946917.886083.496147296.9034  
11.40439124.714 18.714872.0409128.3537013.0124411.0599420.1360854  
21.9154518.668782.4147911.1666050.01577188 0.3185656 0.3097812  
0.9894036 13.517791.4710290.5330335 0.2586497 0.4990617 1.742768  
6.1169510.1102741 3.6443681.84957627.709031.6756611.44101114.96304  
1.6761723.2313292.4075460.6681867 5.46533420.8798 167.128132.37336  
3.08373914.291172.3790470.8124785 0.6088977 0.1463774 0.9522656  
1.2987043.4775080.1919699 6.6045440.8541984 0.2884595 0.1403476  
13.934265.553025123.95544.5729041.0597135.8536891.4915091.0962393.639147  
0.2033545.1170930.6342295 4.1841682.99688339.564650.07684483 3.073496  
0.3591394 1.4943231.69433 17.121261.409126  
AKR1C2 21.252161.07616842.3998 2.44093410.8400631.048727.5914726.311096  
1.1048161.268539153.120611.4222125.6110541.249160.7622255 53.9656751.3228  
61.35 87.413028.86022917.8241334.5455446.32242179.160914.567912.587079  
0.8447412 9.6440223.6014890.3340337 6.61966 3.79633745.9846811.60651  
101.435927.954280.4389668 2.67738732.062350.6781493 14.998080.1653429  
17.1117211.6670239.1092989.5995 1.4586090.07363876 20.2543116.12194  
1.87000220.5372833.0406314.8324 1.46722811.9301237.967893.676805143.6973  
0.5552660.8948362 126.226847.533260.4739021 0.4876601 24.63802  
0.44044765.178015.6963780.6872869 35.047460.8586943 9.59967636.64836  
3.01222914.158780.2927058 18.4306115.2076937.4079213.5513697.30727  
167.69777.3855311.1797996.7767680.1079633 3.42385539.801540.1495164  
1.85472226.1377889.807989.07229870.15658184.501535.457130.5702092  
4.48834332.397594.0720570.0770547 27.5004424.3286641.655578.135759  
0.2894689 26.909032.4171764.73322480.670114.05417827.0911538.2001  
3.1587360.2640521 129.947837.1434823.4342215.4164 4.966006180.7962  
51.346560.6323399 0.51022415.8970628.123183.09974242.2429266.8484198.2367  
0.4260976 0.2923047 0.6486544 3.70091 35.9031235.860420.5821313  
0.07642888 85.1693953.8730781.7627432.94669320.71061.18067817.26692  
65.9586721.3925 32.409068.20327113.1433 0.4703554 4.23226667.4652

7.28336932.923430.03364371 19.537291.87887230.2025629.308561.703513  
14.731480.1631982 46.0991515.8651 8.2248993.1555711.7877763.216643  
320.60982.0318350.5167707 0.2605049 114.24260.1333994 15.974461.87189  
104.527 0.9195772 20.04054114.4508175.6013165.91275.52730152.37099  
122.868846.003390.4263947 9.0202440.4211378 12.2213152.792566.318299  
0.1269389 5.96478129.948250.8676523 260.573927.463850.1622446  
17.3518623.16648136.48830.7983440.5811078 4.93831114.904873.242086  
6.3799310.2681422 172.02375.245796107.61679.83817565.691180.6836342  
36.915629.79545 0.25654428.8090817.483844.03592 144.89860.01897187  
44.8156136.161470.7673089 164.427853.808038.72891922.2831719.28171  
12.6312717.618260.5444511 0.3521607 0.9920756 20.29161311.9862  
12.984585.4948220.1816556 19.62485141.582742.2242217.303851.348431  
2.8311681.64074386.8282293.1015234.4423872.6626526.1326254.1544417.75143  
44.5573122.95778325.29333.99154313.9117326.100919.5777621.9308836.537656  
30.470090.06402169 77.8216611.4570820.4497327.189340.3713067 15.25637  
0.4767176 0.5462288 1.518801159.488 12.380581.6800410.7671433  
14.2039911.51851211.73133.1894712.38849612.50912181.046723.8946949.6085  
0.1572097 0.3985795 4.04795 7.08113760.865531.6337341.06990431.37179  
36.3711 3.52967459.433275.54851416.0493834.061271.4657912.53258110.50568  
0.27257710.7056932.508770.9463433 108.327875.016530.5188935 38.35184  
1.0786320.2365591 0.8371682 0.7610334 1.4021730.4440676.488946  
3.47152346.252310.09544792 43.949535.2873410.02914787 0.07692445 5.39435  
120.33621.40952715.0149910.005840.6458971 2.096372122.459811.33809  
0.1800703 205.059117.845397.33989227.0752556.7059171.349823.68029  
1.6706622.33952425.139450.1279426 15.1520820.374725.38691858.11837  
101.6833463.443 56.42249328.80922.09261124.4146860.2535957.7117424.66637  
0.1727067 53.4277722.3556114.485382.2174840.01247162 0.5917474  
0.5179762 2.83299111.444040.8097361 35.183250.2143672 4.684265  
46.259983.70523 0.4359963 46.2570824.7288437.112230.4049892 16.55116  
155.08410.3786953 95.498152.0801490.60252636.6431814.3851763.6798  
283.635714.4568773.016 25.594930.7446391 4.4183430.1062107 78.30328  
3.82532940.901990.05622233 665.85940.3345290.3229727 0.2273546  
10.2190250.3235249.2394627.328010.4474377 7.8668361.97929912.96407  
58.867570.1813763 90.079920.1918803 44.4255431.33157148.34560.09645251  
29.577210.1883352 1.5972971.94328443.391986.825741  
AKR1C3 14.123861.02904237.503491.3895575.10104 21.836347.0791056.446482  
2.2462662.781758118.787 15.1526528.7046332.722441.30662434.4296344.22276  
148.500186.359031.02379725.48418153.4159113.3178274.567528.208424.972324  
16.9970135.4357 21.952590.8207596 8.2723024.21990228.046619.855862  
33.6248121.8154913.437076.33649978.4297712.4126312.052771.82271823.3503  
25.7532529.63019104.59143.7460770.1857678 11.9628323.995151.250835  
6.77723122.938767.1002183.0361155.55193743.796343.751267158.398317.5073  
1.053451179.138156.395550.2474574 0.9241369 11.375071.42701611.54187  
9.0692481.05536420.3400613.3370325.44864117.64842.31887815.166410.519855



7.55765714.1236212.1552215.59301151.4671113.07777.3044410.7323427  
7.0976470.3082184 2.79278331.915280.9079858 48.0810725.8686265.29327  
19.0379364.43274261.634932.000042.6535263.13970532.321194.0338673.203306  
55.0866719.9232622.3084 9.0504910.3150058 105.613920.233685.729381  
89.347420.9128105 6.93475745.888341.5998214.91849120.609048.975249  
39.258750.73325 22.42034101.848272.839923.6726665.88003114.0062242.7086  
10.5089437.0938184.7757989.788151.8738061.36213256.887243.05756246.5682  
79.550961.4960580.1369205 102.4368153.539217.9847 20.74832163.7865  
3.6515910.8160658 48.6763311.7304710.4240517.909072.8659933.80443  
4.11507231.0329 4.15294355.290750.6559952 19.604072.10881530.89814  
14.431039.65576319.704930.7115781 17.3475558.7597214.8887440.9273  
89.9005852.02004358.34024.1722881.1480791.389648128.86570.1514365 21.0211  
2.42406334.909583.9930465.94039717.8251785.95738277.75016.26841 129.7444  
43.644766.9682181.71872110.9602316.1445913.0154838.769444.2702650.7056867  
2.16943 35.722391.935323426.81 3.4129841.71341315.7930513.29305147.4313  
2.7286120.8804573 17.113376.9739844.3458887.4746843.518699175.3862  
4.573078128.934952.4689719.7130557.8406224.908788.7391910.3337028  
40.2087613.7379210.8552980.491460.1116737 44.477329.06891444.64506  
82.9783328.575135.93902615.8833214.439548.09343711.486321.53196 0.4930179  
2.57630915.56118533.204735.8642 8.90122543.6513930.04773146.671926.81195  
23.759874.3973112.4031392.80805967.01272119.547 30.4579833.2956736.63527  
19.5889920.2153666.9390524.75239335.37331.12808712.3955918.2626520.74312  
11.585826.82315518.330940.4030196 50.348364.41125425.5054925.60012  
1.23493617.276276.11745 3.9855772.54958 92.3500114.173840.3046097  
19.7610613.687075.078651412.20151.83858414.843244.616052347.404 51.60599  
45.605231.3807650.4682843.6733079.70884354.041735.5922 1.33558215.15324  
87.453141.94971546.6881 1.97401 13.2473415.636897.5997656.4243218.128368  
2.14883612.62123165.63791.597614125.424234.772257.33044557.896147.202291  
1.2259642.9225512.1186439.2876280.5134451 12.953424.93057666.42511  
0.9129788 94.8192927.726810.3174091 0.1859709 11.90241170.479  
3.82957220.5675217.882544.48573139.85032109.478224.994050.6803694  
162.388252.754545.82707329.1819631.6392630.191048.4484821.10771728.21873  
117.324 0.8022215 47.429695.66718 1.599507216.5349209.8893570.1092  
95.25638525.442717.2083331.5873834.6318231.049178.0785310.33235 77.46288  
22.6443516.5240711.154420.02447048 3.1086011.3021572.11873710.13859  
12.2538310.036171.81516615.01007104.01643.5303990.5307054 42.60984  
18.3452523.510143.29886912.3690139.014971.56568245.833624.3870850.3891671  
15.2144364.29236125.2536112.485 7.12260554.0407 10.180042.6885043.007823  
1.62675913.5088923.6532128.739940.3516241 109.494 0.7320031 0.6782597  
0.5500528 6.13942 29.4974669.1473353.945730.7511282 6.1313097.387861  
7.12481261.918860.3784515 46.698551.92240493.7229920.9288522.60313  
0.4400034 67.1507825.9352525.114650.5556494 93.4179731.48567  
ALOX15 1.0874330.01788304 1.3989090.009297051 0.6247088 0.1282463  
0.04978184 0.06824558 0.04612481 0.04912758 2.9847541.7637950.9145375

0.1434206 0.01596744 0.1684767 0.7861860.1086775 0.7245125  
0.8093389 0.7571885 0.8823705 2.9068270.08996382 4.1993140.2476814  
5.42802 1.7272371.00791 0 1.8064690.2429217 1.3270520.5955701  
0.3667027 1.3208833.7891212.1873044.8255160.1800513 0.2305056  
0.05140826 0.5397942 1.6150770.2201316 0.2637823 0.01638151  
0.04833535 0.1824635 0.4579346 0.1278161 3.9961820.8849871  
0.7388404 0.01372541 0.5648284 0.5135111 0.04485871 1.284451  
0.2398435 0.3524141 0.1905892 0.2624241 0.1881424 0.7184812  
0.6593798 1.4066422.11926 0.3126480.8434068 0.5349911 0 4.805999  
0.08034706 0.1815778 0.4118842 2.4777830.4390546 1.5116960.1657187  
1.0628720.4738098 0.006913049 2.2644170 0.3962487 0.1190539  
0.04917252 1.38349 0.08708224 3.9985181.3433774.3408940.1329688  
4.6387810.4357278 9.05481 0.0145822 0.9255651.1854610.1252193  
0.6611205 2.2923847.6288860.8562961 1.1780660.1197498 0.4452775  
3.5683840.8125518 0.9370409 1.0049990.1071756 3.1135610.8933929  
0.4857513 0.04255803 1.1170755.3679340.4459932 0.2966381 0.2974674  
0.5920693 0.02895755 4.16462 0.4209471 1.7036841.5490611.321224  
0.1409366 0.3951749 0.03902566 3.6873930.02240878 0.2639626  
6.4740252.8770180.4223234 0.3729788 0.05931795 2.5185533.250438  
0.9795130.05031548 0.6173562 0.7148456 0.03978337 0.03809931  
0.1489420.1923036 0.8973811 9.1700582.4386970.05436371 12.091561.74609  
0.01656241 1.0974260.05016661 3.6653120.5438731 3.8368710.8094792  
0.05356041 5.6308761.6043582.2255341.0423162.7223620.05322744 0.8415702  
0.1282762 0.0444583 0 0.7745581 2.3791663.3465050.02359066  
1.4756220.6964573 3.2602561.0129760.7911586 0.09796329 0.129305  
0.7991262 3.9625 7.0158930.02607568 1.4515211.0330930.9898269  
0.9972009 2.6811590.07776602 0.1781882 0.3198147 0.02690616  
0.03553148 0.02193048 0.02505761 0.09495011 0.1435908 0.8482261  
0.1521351 0.01129234 0.5561413 7.00079 2.3070370.04603964 1.221849  
0.7534083 0.4689308 3.8258890.1957798 19.7366 10.534920.1192767  
0.06149442 0.01804195 1.1278990.06041126 0.8239292 0.8656225  
0.02988682 1.4411961.0556251.4361030.1904431 0.9865412 0.1377842  
0.8989745 2.7591111.1503720.3866720.8070264 0.0749685 1.538089  
25.200315.5985249.5184940.03931027 15.348053.5092183.2941660.8484285  
0.4438611 4.8889983.5245240.06638786 0.7778227 7.0479881.396516  
4.8737120.3639086 5.0197351.7385413.4875480.9962641 0.04599612  
0.5621695 1.1766350.3617171 1.8076315.6028970.3591271 1.197801  
2.2272110.6924491 0.04332358 0.3747085 1.6759252.2272913.015382  
1.7265930.8718949 0.5390739 0.1870167 1.1541580.9763632.8603931.14249  
0.44281 1.44635 2.8066414.0265813.2524315.8069850.01393936 2.538252  
0.01303453 0.05063641 0.5698070 0.1851855 0.4037802 0.8508256  
1.1265011.8172020.01358841 0.1403613 0.2264130.2725435 0.3251532  
0.1471983 0.2550916 1.0734640.07667801 1.3049630.5740048 11.50259  
1.7708230.5889854 2.5435830.7619798 0.1261121.0329080.01427284

0.02795881 0.7861885 0.09160761 0.2428631 0.1662923 9.732594  
0.1409637 0.1770175 1.41437 0.02295866 0.03786902 3.6162420.02313389  
0.2111851 0.5241844 1.3420910.09150149 3.0841960.05614114 0.2787639  
0.09583408 0.07558442 0.7064981.5860230.9678828 0.6186621 5.748801  
0.06331822 0.3892296 0.2190277 0.05229946 6.2546525.6695110.03994785  
0.7644109 0.4266888 0.1297487 0.5585298 0.1804307 0.09162654  
0.01912146 1.0991032.2413330.2022312 0.6408948 0.02180039 4.189163  
1.1753730.08221234 3.9530480.02455855 0.04556811 1.5901690.4126633  
3.8807740.03066336 0.2049362 0.2283610.3053622.91434 0.02999453  
0.1907875 0.2166284 2.3782740.07645118 4.5128330.03261353 0.7867854  
0.1509174 0.05123761 4.1527630.9931959 0 4.4974380.02310689  
3.3588853.1945591.6728770.3676544 0.3580522 0.2602683 0.7768249  
0.06630324 6.8167730.1025542 1.0655880.1627730.0687380.09274752  
0.02276422 3.5962143.3982540 0.03031295 1.7664250.1593725 0.1125838  
0.4233542 0.1475664 0.005330715 1.2395220.3053791.2145630.9319539  
0.3048703 0.3228807 2.2973910.009759499 2.0373120.8524979 0.04936192  
1.495581

ALOX5 51.846531.29744632.862142.8932124.43511735.406959.91043419.63718  
1.9012241.4657225.6892298.16317837.3678327.457542.03277953.4928799.7538  
12.6644261.3981524.6354915.4297693.7602115.525170.7216248 8.613235  
6.54471824.8017132.8996349.736886.80128714.7470741.9957 67.954938.623115  
20.152812.786767118.672721.1463 29.986596.7916822.0115634.65503151.72473  
30.1753773.8047261.583551.6245433.25790316.0221254.066064.19366732.69106  
30.2085610.3879142.6128223.258948.3523010.2538161 15.9503254.8169  
6.27911614.755218.44682115.8169 26.517474.6545035.29444198.3263 31.12929  
7.32700545.997675.77967615.5240514.791612.99379224.651276.33627132.62498  
39.9574 101.017451.6270454.5609 4.6811682.9969430.7015801 0.9417103  
8.88203 5.70908 33.703352.43333540.8851670.799588.2655236.72764368.9303  
10.1060120.445674.47139645.2395921.425380.8203326 14.4702470.48478  
68.8470443.7344520.930777.42254966.1712254.6358 41.089785.06672828.56374  
66.8765514.0124627.236 28.8392716.3574715.930875.2140239.00856723.31858  
35.399549.7442291.2043012.16819554.5502322.0511621.9638211.8758151.78272  
49.989817.02502847.7299426.933 4.44079923.3560618.825027.7382823.481438  
63.8235127.406634.03452664.4980332.515645.04062934.2153310.0296245.55957  
26.8480620.8840730.3989533.072768.30874417.1658728.6273458.6089311.20012  
3.9777572.25476735.3247747.6143 57.582233.6694355.23551216.6341935.61615  
85.2473376.60962122.600432.6318719.990522.15176512.162784.27909848.38432  
3.69862325.2078 2.58884459.327796.27451850.3700262.7537529.425762.157553  
9.57883 31.0265122.3171614.2395215.0870920.9571719.4204112.543 33.29114  
35.154686.73701642.8354 50.7992621.227431.1349126.7746597.4777020.7427273  
20.216064.92526423.105054.86414828.1607270.858424.11529431.5171 33.28056  
9.02920814.6897935.0654 20.138539.18879528.9581 136.21629.7648522.572671  
15.143244.7854015.38184 34.736 37.6595995.2041623.7003321.955568.509172  
20.916324.14050426.6837811.2368947.0437635.7386 33.255061.85408210.43872

1.2211235.00815415.717159.73097749.7631850.3778725.6024320.073116.098213  
19.357848.6236292.78693716.369813.03579257.4095851.0549855.1966842.91091  
19.6921345.5936818.582471.73070627.2431718.9925 96.0300364.6648 24.91237  
62.7255 48.3921 10.271437.6241117.65043310.3442639.3087916.878137.258966  
34.7314715.921276.16633783.4710214.7291 36.099675.23994 39.9548911.14105  
3.84109515.130987.20521512.352834.9618032.86224112.9915615.8653910.89998  
39.834761.15475412.935570.5246977 9.29291737.1091441.096332.405753  
21.225148.71532132.603494.0279033.0429418.4776811.6024647.84435416.90287  
83.8784 1.864647102.801768.9849632.4026214.1094113.4049522.6878716.26873  
4.46516415.887792.42443323.979691.39043613.925836.44647314.6095829.729  
8.74749414.6333914.38739133.111214.7023648.117238.13054 8.06651620.15715  
15.341050.8383638 4.5565740.4866808 18.4479980.64892101.60333.696475  
56.5879712.3920911.2451129.5629642.544465.95291313.543 5.89986536.5758  
31.0474125.0223 22.7708327.1744 16.2498515.3300543.5458413.3457942.98705  
17.758643.30257827.314989.45358712.8534923.6310511.6393755.463152.520997  
15.8449619.8572 13.6139317.0894 10.5464323.182758.1314860.9580557  
3.675715106.481383.2983347.7013319.877131.04667 2.5916739.26013435.62292  
10.261219.1472017.27812 76.7747912.1779517.090577.7241918.96667645.38798  
8.70837737.3925924.7697347.4000625.5199439.087 12.7724340.127424.987061  
16.8013315.9549225.6353433.7946713.3172629.4444614.0438744.715147.030628  
27.7865397.225755.541022155.559 13.7833 3.40597854.4749311.2454622.02159  
57.2102323.7492511.4246125.8550119.4927915.45383

ALOX12 0.6395769 0.5701107 0.3077474 0.3750237 116.06330.483065  
0.2683631 0.4795348 0.4401369 0.2753733 25.390141.04147 0.557641  
0.6734627 0.5505959 0.3379732 0.6671762 0.7179465 0.3079658  
2.54506614.358530.3827203 3.97244414.7561 12.726851.9850066.265623  
0.6766097 0.2375934 0.1334886 0.6644609 0.5069454 1.268528  
5.0820129.0374492.3840922.6578441.4741120.5694973 0.4100021 0.7592213  
6.8157185.2679462.0201191.5533880.5186733 0.3694775 0.3144754  
6.9895849.5478590.4751923 0.4077432 1.6465370.8262 0.4107759  
0.3149862 9.2785730.6479202 0.6199216 0.5599261 0.6987724  
0.3141321 22.518720.4308748 15.470879.5000286.0506060.4222821  
0.7970446 23.412494.0550320.3800415 1.5164650.5607653 1.31788  
0.2533597 0.3793117 1.3846960.5017183 0.2803281 16.613696.347481  
0.2428763 3.2877890.07694936 0.5585753 0.3042988 1.26547 2.097354  
1.07378 2.7528540.4616286 0.2377628 11.276971.0462560.4148627  
0.7757450.09487351 0.6021833 1.2072131.2220373.69491 4.3350141.565235  
0.7664373 2.1475790.8663658 2.8035751.51989 1.5424310.9652787  
2.0387151.2318910.4533077 1.2612070.2136578 1.0429436.80425 0.1926372  
0.3675465 0.5723336 0.2408445 0.4727542 0.7374561 2.445516  
5.5470160.3813975 0.9800984 0.3650372 0.4112382 0.1779961.358394  
0.8738042 0.2915882 0.5301453.7780442.3560376.0948640.4172124  
1.0677380.4503927 0.9879229 0.3199972 10.794642.1963060.2111437  
3.15779 0.3470299 1.1459880.5362075.4550440.5043018 0.3311259 5.97242

0.2825666 7.14583 0.3879251 1.52481 0.5711822 1.5006760.3823208  
4.4132110.9324411 0.5885276 9.3661060.2777119 2.8760813.993507  
0.4940938 0.8003468 0.3272625 0.1271741 4.5637362.6699761.019197  
4.9220710.5026898 0.2839446 1.41897 0.4349983 6.4684141.596146  
0.8350977 0.1784610.4169789 1.3791580.1239447 3.1034 0.4071633  
5.4479040.1463166 4.3063952.9490480.4303752 0.3975359 4.608269  
1.6861260.4638946 3.1373343.7596770.3831152 0.1676768 0.8492895  
5.8946540.1814649 1.0873463.6289623.5584340.8111831 0.5541476  
0.9539389 5.0232933.4836724.5788990.3760644 2.7892240.6896866  
0.6811804 0.5867984 4.1494912.2885370.3458775 0.4896277 8.560397  
0.3791719 4.5134770.8710661 5.53303 0.7335145 1.2493250.4290107  
0.5816158 0.6858925 4.4097611.3696772.27654110.754970.4255844  
2.5121987.6852 0.7687667 0.4219993 0.7447324 0.5197842 1.453592  
11.798950.1740599 2.2336562.79672 2.75281613.550033.2711244.368219  
0.8985921 0.2889314 7.1133950.6910350.3963984 0.3689646 13.51257  
0.7653742 0.1686195 1.1980810.5237168 3.6235340.4673046 0.7267125  
0.2825191 0.7758876 0.1832144 0.1300212 9.1070411.0393930.8396362  
0.4289784 0.2279663 0.8455901 0.08111682 7.6375840.3268675  
0.5460161 0.7249639 0.6242108 1.7227 1.6967862.5243433.636438  
1.2484840.4262483 0.3427467 0.4791437 0.5106419 0.5214566  
0.4075485 16.7171310.690910.3690381.5761615.3720960.2121787 0.3774589  
6.7459020.2364267 4.3955079.6601730.2046909 8.8526742.13519 0.3855473  
0.4251632 9.5023550.94839 7.9867112.0311240.4406693 0.4318418  
1.0409750.1764354 9.7791180.5892519 0.2221491 6.2133444.158071  
15.202172.3845290.2894006 1.0804990.3211491 0.5349971 0.5050667  
0.4289586 0.4991246 0.3133885 2.6009610.8453535 3.3340660.5009291  
0.6265406 1.37171717.681544.8201746.0186080.9578775 1.7923030.6166699  
0.6965797 0.4162805 0.4275060.9475109 7.2122260.5847445 0.2339148  
2.6014432.5579661.5496368.3081512.9612650.3099891 0.1119658 0.1479494  
9.5915051.0387425.2841260.1645296 3.1734452.0494260.96765210.59507  
0.08521641 0.9063555 3.7420090.3281465 4.3026670.1396496 2.233342  
0.4232118 0.5960162 0.7149242 1.8929340.8137319 0.8392392  
1.0810130.7958405 2.8506431.65506219.615450.6006832 6.4115820.7204895  
0.2864174.46896 0.5270101 0.4284581.6274391.9369995.6083140.9815459  
0.4585105 0.1693336 0.4831954 1.0274616.0260920.3396804 0.7322998  
2.5063470.4174029 4.6808630.1184853 13.955240.3093501 0.1406541  
0.8381831 0.2114854 0.6967943 0.5092503 0.2203513 0.7335042  
0.1872841 8.6656440.3434861 8.1742141.1079880.6457976 0.1729988  
0.9604556 0.3746290.4767144 4.27035 0.4863195 8.129615  
ATP5MC3 27.9357816.9288619.4180216.7804626.5559916.8222 18.5881817.80342  
20.1278618.7247140.2198222.7970720.5711324.0939813.6404 18.4257126.51808  
25.5481532.2017832.9432229.0867 34.8006858.9860731.3416141.6476458.9401  
27.5413610.3358522.7642940.4498619.1620421.8888148.3837520.103 26.92771  
15.2433811.0338324.3872242.5272219.0663241.0077733.1776927.9037823.22618

23.086 26.0074635.9551426.9681129.7951223.3762645.8921420.6816240.26561  
27.4905647.5654527.9616145.7541633.6185622.0313716.5608823.6123634.65505  
49.8350419.7458529.5897920.8482719.2766736.9513726.0121 16.8754316.01529  
36.5045129.6609839.2466113.4557925.4091727.8837430.1658220.4829645.61108  
25.3641318.1331928.8388766.7052641.3584420.4993711.1241422.1806116.36697  
15.5646528.7897838.4063754.8844536.1814 16.6754225.7981 23.8366743.1256  
16.883879.46786540.116659.96592326.3956225.8387233.3222324.3872418.15689  
12.6130130.3568316.2797535.5664215.4658629.7250431.4893822.1097 11.49321  
31.3452322.2912819.5370636.5993244.4791945.3553121.3518528.6804429.36373  
28.9472542.4307518.1446322.4172661.0717320.9188415.6453433.444 19.30613  
12.1722615.2090440.3609325.8213 16.8862131.2457229.6317523.8595429.70555  
44.7415120.5492214.8051311.764592.89156541.8467433.3967232.6655321.60499  
45.8948939.7792148.8187420.3623621.0961824.2897838.1140728.8379514.99317  
32.3419525.6438731.4532824.1524 25.9789537.8946517.2356928.0566124.23833  
23.3698831.0882420.1186221.8833933.7275632.7563225.5103518.3168113.09863  
23.9367925.8224825.3296526.0827244.0950316.7322931.4128833.4919738.87943  
13.2932925.1316 31.9746515.4815537.8650313.1537819.6472928.3557419.54497  
26.0716744.7532355.6031322.4091 24.3088730.5538643.2322718.0833620.96199  
21.5204 27.3636615.6356730.2053822.7589 22.7674926.1598529.9102912.21188  
36.1440820.5492833.9878728.6152314.7037713.3891326.3116 28.5331837.99944  
19.5666822.2161719.2176136.2011721.2762 21.3822623.7918223.2252818.02069  
27.7645927.0278228.6731122.942888.66750844.9304836.3615423.0941 15.00453  
18.7758 19.0935931.2899829.8708833.3171618.4105519.9817426.8025834.60463  
28.0109621.7192115.8173 29.3877613.1708122.1919917.6864339.3648947.26612  
30.263 20.6865640.2531315.9529922.0840425.0433214.3481226.0844123.6244  
23.4967945.4015523.5333820.2047917.8928835.9453222.5358325.9342133.04043  
22.1156331.5772922.9636 17.5763745.4921 40.9762726.0443539.7242522.57974  
38.0020317.6186414.6912921.5336331.4447810.7735919.9957616.6309325.8539  
18.7073216.6753912.9061421.9438120.6008734.5656517.6288517.5219530.68265  
9.00563440.8459 34.6938 18.6361325.0590230.7559325.0077534.2088519.82802  
29.9934422.6372933.5963 32.6621428.4448520.1211323.1114730.4360639.26941  
18.8214828.8635749.1201223.5526 22.4886616.5329111.3092676.2912521.03262  
21.0847914.0784728.5101715.9889161.8371432.3142924.6172 31.7922334.74859  
30.6187130.8777246.7260725.5488535.1017820.4332813.0896437.6919526.79104  
29.1152535.172267.29779826.1852426.1615948.6186122.1794355.8899435.41278  
45.4348340.2649516.6327419.3290315.4787239.2408 22.6760921.2983831.98979  
21.4459534.7813223.1277816.2140533.4457641.6088327.9028231.1471428.62432  
31.0467631.9292723.2232 26.5600523.4584136.4988318.6016439.6308 50.32848  
19.0985826.7407229.1767523.0133121.7486523.3782536.0941132.9307650.30879  
22.7541241.4269117.7939210.8877418.9672334.4112653.6047915.9709113.22663  
18.9596427.5426 15.7091327.9479938.5942712.325668.46613 19.4233324.90723  
19.8534120.0796132.9071928.7890822.0666339.1948725.1938719.5738432.29192  
51.3798925.8417826.5198426.0919826.4867633.6807926.5247712.96114

CARS1 6.1780985.7465364.57026 4.4741784.1345223.9465174.3872395.045644

3.4805694.8894746.1184544.3682424.7003625.4794474.8493834.5353358.668991  
5.6590376.6965514.5561385.0952245.2612035.1241837.3804 6.5239734.526452  
6.1508759.50289 17.2746812.948725.1321524.8623126.6955585.6050764.666191  
3.3027846.7867348.8662976.1579967.3072689.8524775.8309946.9249224.916971  
7.6264577.44709 11.155877.56874420.324343.3770097.7758446.1963076.223937  
4.8352984.9574753.9367297.5239298.0206174.5969293.3732915.2503228.405015  
5.1571826.8427248.7018116.8219247.7960333.1601078.6492686.6143378.958582  
17.959766.7989358.77675710.015856.7888636.4372745.5851344.1346868.332048  
5.0375383.8310036.3536685.1465014.2432235.9129769.1553866.4297643.553194  
10.025939.7898198.4767246.3694556.6502946.1376577.4356048.1695198.832634  
4.6377326.7080064.31196910.591447.1907473.3065913.2801079.8339766.342056  
4.39401210.055956.2863073.8929636.9461573.2137764.5413196.0254976.724185  
11.2532 5.7073324.0835938.72245410.6258 6.0934314.5772699.3409968.161783  
6.6169133.2866044.1185066.9791055.4243465.45365 4.52484 5.6468449.271791  
6.8814895.03916 3.4734369.4419489.7622275.9815735.5110777.91239 5.828292  
5.6013416.2076986.0861968.0684192.0630849.0637856.6212655.6189795.7098  
5.7391634.67251 3.6890423.2024068.9348735.7594346.2440515.8714395.737091  
7.8855626.29621 5.9600584.4652544.8246097.0282337.03367 7.2945357.01815  
7.66846310.233865.12645815.396593.3500057.5648444.46446810.754885.579798  
7.5980863.0611874.9357895.4151373.8628186.5188674.2412224.3761697.484871  
5.8366715.91016 6.1088035.8451936.7823647.2410045.2992845.3280584.983715  
8.2399594.4551794.1817996.9345054.0758377.2132265.9051755.1466885.634829  
5.9412984.9711576.2331276.9560917.6572278.0392137.1881843.3847555.966316  
7.2449845.6567754.4047877.5983668.8784383.1930834.1427117.7998825.561086  
9.1299776.4824785.7863775.2242595.6268933.1247445.67255 5.8012915.737337  
3.9928184.4004067.07622 8.7411854.5328329.3677265.1327825.4751354.749485  
9.3331584.63963 7.4329354.6793796.6812066.8312896.6818124.5045257.353953  
5.5610333.9838875.0556 6.1729853.2159396.2374366.5445063.5633155.370981  
3.8731635.9382877.5649353.8100063.2010465.84192 6.96320614.218595.812309  
5.83678714.679927.79112 12.445775.0838019.6514137.53065 8.0868444.251878  
8.0357695.81725811.202275.4628498.9688966.1406176.8012127.6006665.858195  
10.378759.0791024.83002 8.6754267.4466833.9074184.4018268.5309814.843512  
5.4000714.7283512.98026 6.1200136.26771 5.8102074.6504765.52596 9.951764  
4.9615254.6387553.8513375.7726784.8488043.5866556.6318626.2185814.566852  
5.2146967.07510512.5354518.0480514.818625.9853564.92291 8.1887595.315058  
11.8817610.182936.6807765.30120113.524835.2032884.60076216.893856.931294  
8.6500964.6872178.6673184.98052311.837444.0266054.6553225.7876089.392099  
5.8875538.4166785.3839646.0703247.2504276.9836254.1201866.41674 6.454721  
5.42988 9.2894935.5079867.9564354.5905225.0286746.1626475.6763126.424963  
6.0861946.5575234.5068053.6950589.9664345.9797485.6471467.6219025.083811  
6.9102216.1375276.1208545.3855895.7766188.1374774.2375178.7797354.576371  
4.4747347.4513559.6697549.35888 3.3533857.07576516.040084.8021964.138303  
5.9432385.4100352.9618867.0936178.6797794.5041 10.493194.9389933.214516  
5.2795585.1100675.9231675.8730235.8524969.53424410.079 5.8969196.120145

6.76797 7.4715475.1046775.16493 7.9059692.7247417.5518495.87787 5.187142  
6.68495710.612857.6642226.9304299.3214615.5833837.3234745.7094996.109883  
4.45080611.433454.42143511.1030210.309627.8910346.0625825.167091  
CBS 0.02836492 0.05382304 0.04038689 0.02798157 0.004608339 0.03047258  
0.05351061 0.0410801 0.02699337 0.03412166 0.02073705 0.02602226  
0.03102665 0.05630304 0.05206242 0.1162033 0.1063077 0 0.08964624  
0 0 0.1702368 0.006867154 0.004750288 0.01777607 0.02823687  
0.1017008 0.004536222 0.1025832 0.01210819 0.1432233 0 0.05376624  
0 0.02207349 0.09024426 0.01187939 0.1923374 0.2195410.3010583  
0.2854528 0.02292219 0.2707721 0.1475866 0.06370537 1.884807  
0.04930387 0.5541949 0.01562665 0.005342083 0.006106214 0.09061243  
0.1713407 0.008686356 0.1239292 0.02602008 0.6064729 0.01350124  
0.5271606 0.04953963 0.1599423 0.1593392 0.1209642 0.06417579  
2.8555190.003985045 0.02559176 0.06906224 0.06081194 0.01311847  
0.5568527 0.1002408 0.4800127 0.3077742 0.1295406 1.716739  
0.1030218 0.007465729 0.05219059 0.4281090.009996727 0.8858719  
0.04161276 0.2723887 0.008475413 0.01863437 0.04052425 0.03288795  
0.07411516 0.7696401 0.2741269 0.02610045 0.4830595 0.4472820 0  
0.4550751 0.09509161 1.0059460.04524527 0 0.3615331 1.98946  
0.06669128 0.01738007 0.1884165 0.1850125 0.1368984 0.1347609 0  
0.003916995 0.04394968 0.03136088 0.1791187 0.1648834 0.2882774  
0.2526181.1631010.04400684 0.8650488 1.9600540.009947725 0.5231151  
0.008300408 0.02964609 0.01005504 0.07657737 0.06415939 1.525241  
0.0407042 0.0508277 0.06117529 0.0150380.08992571 0.01151384  
0.2167540.1560186 0.0110050.07549407 0.004959188 0 0.6188713  
0.00627248 0.8581362 0.09553922 0.1649915 0.04989044 0.02866712  
1.5267330.0137805 0 0.5502738 0.5886031 1.4569960.08912398  
0.03778287 0.02492416 0.05909238 0.1509878 0.009974307 0 0.2010278  
0.02662634 0.2567294 0.03008858 0.04060813 0.1414584 0.08043806  
0.0355119 0.1572333 0.05580134 0.1654613 0.03221287 0.1688654  
0.03492446 4.1262140.01211167 0.04733428 0.01736547 0.04471777  
0.01444711 0.04366742 0.06660617 0.03603632 0.2086867 0.01406521  
0.6307041 0.01395171 0.002616022 0.1978111 0.2220947 1.212868  
0.009094852 0.1270796 0.005572724 0.05586433 0.06085115 0.04723842  
0.1425867 0.02200157 0.09112832 0.1258766 0.002182672 0.02337846  
0.0572356 0.05664476 0.5538418 0.03429437 0.01826048 0.2338313  
0.09193576 0.04060356 0.07507197 0.01877834 0.1496492 0.2230949  
0.009411465 0.3058065 0.04112919 0.002262556 0.01438419 0.01515178  
0.02928899 0.68854 0.01124389 0 0.3142702 0.6499842 0.06878177  
0.01325544 0.03208933 0.01511546 0.08675995 0.0363906 0.03232713  
0.0118196 0 0.2172721 0.4890199 0.4135353 0.03763292 0.0739457  
0.0095698 0.07541054 0.01273544 0.1595961 0.0244 0.2855711  
0.8922491 0 0.003981349 1.4019760.2047679 0.1035239 0.0309397  
0.01034796 0.2355481 0.5322053 0.003844208 0.1899054 0.3994944



1.0088420.04398664 0.1416790.08394656 0.1377585 0.02580304 0.5480682  
0.003216176 0 0.07205196 0.03436738 0.3858455 0.01244921 0.08408694  
0.6029038 1.5854220.0243215 0.01238396 0.5373141 0.3823883  
0.02476345 0.3516944 0.1151618 0.4803622 0.06789302 0.1233898  
0.2799661 0.006992277 0.3363276 0.07846075 0.02540029 0.8323538  
0.09426587 0.5767103 0.1056754 0.02032343 0.1822828 0.02328769  
0.05112174 0.2370409 0.008736424 0.3189983 0.009061315 0.3691889  
0.1322246 0.007132084 0.1269289 0.0758953 0.1816192 0.1898007  
0.2708177 0.01554987 0.05016417 0.3491933 0.02663597 0.01523907  
0.06801579 0.01963461 0.02208465 0.008354964 0.1571938 0.006763436  
0.2864668 0.05499696 0.01593769 0.1281637 0.1381985 0.46947  
0.1038416 1.5462920.01513355 0.01421308 0.3294485 0.01835963  
0.01586767 0.2936850.1239436 0.03365067 0.2843605 0.01277096  
0.3495236 0.03419087 0.02342143 0.1619293 0.002887432 0.2112933  
0.02929837 0.01412627 0.7307930.01572689 0.1770083 1.6399630.03057658  
0.01627116 0.05013573 0.2306490.01225648 0.04316276 0.01901148  
0.2414869 0.1841999 0.02276009 0.0306195 0.1814555 0.07075101  
0.02624328 0.08395975 0.004106361 0.5877751 0.06040204 0.07666687  
0.8933385 0.01153604 0.0738877 0.01735617 0.2165592 0.06390794  
0.2933947 0.3030596 0.2247397 0.00817118 0.2262622 0.007059455 0  
0.01401188 0.02671882 0 0.003156232 0.1777390.1449456 0.4548406  
0.01738635 0.002376428 0.02312826 0.09527468 0.01271884 0.3364058  
0.1818459 0.0363979 1.0249850.6387609 0.009353332 0.2105690.1932391  
0.5344465 0.1628344 0.1865105 0.02004374 0.00701496 0 0.2204813  
0.01072731 0.02878006 0.02151406 0.09768714 0.2960896 0.02941398  
0.01413114 0.1350101 0.04438248 0.00336322 0.2525112 0 0  
0.4454968 0.2330782 0.2154231 0.1238049 0.02178044

CD44 53.4031833.5995619.0043151.4089345.9661138.8635133.2901935.30471  
36.4251650.4027769.1280937.1164234.8513844.7424929.1627448.4113824.39567  
22.7552530.798791.49809620.362252.33564820.7849691.7990923.8350211.10215  
14.0131410.614975.54736297.6586 44.1814368.2984613.7791 56.2164721.99621  
4.8153289.4785255.37408927.6824660.7084780.8159261.438155.25978332.9371  
52.447988.75167937.5928214.0042527.313865.05724237.3907424.3940515.10323  
49.368492.18345538.095114.554222101.28977.74169312.1197 44.5489333.97896  
14.0268128.7582 283.062550.6217 14.6063828.3561181.0338915.1674521.65024  
73.2830512.3386 58.1506 17.9842128.89098257.66511.17122619.1946822.69999  
28.0785613.02648132.93 58.5856993.2052994.43205135.4156114.536612.52965  
1.8583152.47051618.7897435.0985647.016763.7284447.9927558.54222 37.75031  
54.8664139.48327134.78425.2989457.34290422.3951 36.9090820.6902269.08562  
3.4761329.92525513.0685411.8829636.5666315.4293 21.8168942.693676.300939  
2.48720222.6020310.764 18.3285323.3489744.8267513.0873618.685450.6521243  
42.714085.80574 18.8126937.132557.4272 16.8634498.4618745.9514642.50095  
93.9739325.8898 11.5764 81.134694.3166058.3354631.30412 28.4574 82.55681  
17.98827281.989728.4274159.3626914.0883323.5229234.4910523.5131962.60508

56.3324428.265835.77312814.5942397.2379356.37806161.30084.36341542.50039  
4.930921116.960277.0104221.7134 30.942633.85926 6.7483033.59209130.03856  
53.5594 96.4639 71.48389292.528510.144910.7722541 97.50648215.0791  
7.87996238.544759.4557956.27867326.2390911.3907829.2527826.370464.793036  
37.4864341.4003126.3965860.0721529.6691169.022498.25081 4.940926128.9032  
25.3374720.9550862.2295866.5437681.466821.501296114.892 25.0186929.51851  
75.2793424.3020220.4444258.165922.2848681.11070481.4777892.1821611.85729  
55.3129641.500553.67689518.77956213.5071105.520310.8543 91.5023 78.12917  
5.67350187.8735640.2478522.4458811.11807137.765223.1892387.5606326.98372  
24.3923426.2489811.0482148.1270887.2595927.107 18.1698153.941131.704502  
43.022931.86776222.961576.68128 27.7978848.4885323.177259.43488187.16247  
9.8511415.84302425.0393 5.35182625.323414.71772728.2151 6.62037914.92527  
36.6083610.1164414.9091817.7209131.530764.52013346.216275.2058011.370198  
25.8700944.6181713.5346553.4429410.3582421.6345912.179764.9906839.183023  
22.6941 21.113835.40302910.7089314.4153 58.0320191.3666 2.0326863.687792  
33.3424258.2283 94.0381412.7409742.0246859.3864450.1274231.4554210.58506  
89.7105 5.12877934.8037862.94362152.185512.77654151.303411.9019119.61829  
54.3604915.9730915.3948734.1285436.383034.98562114.218844.48432529.47559  
1.29654348.4245920.0081446.31293103.111673.8984250.6870792.3739861.77086  
106.73025.3156 70.470773.94826 1.95813186.4854862.467274.4733732.951964  
28.0259857.378943.25068654.4741415.0135759.1156351.3797229.95668102.0709  
54.9974932.6742856.69556308.32623.921823560.126258.279052.12024669.45111  
28.262735.82940471.5337852.4586517.5214437.2989145.7093324.122856.76288  
274.900435.123251.51190938.490157.5097985.02200718.4288745.10058145.965  
9.87414 60.2867 5.235167105.583334.398718.00712690.089281.50001666.48883  
44.437779.86957798.7308257.9533742.8969110.1761514.2501810.23812167.2753  
59.0201844.8762659.3978230.0050684.2727 90.238298.65678128.9181784.21923  
26.0863510.3452626.4499948.310648.48211689.6036310.676133.66462610.29987  
34.5806360.3296482.6711474.6060938.7434129.8541814.9456228.8668 124.9904  
50.2858770.0524673.6921927.4979323.62888127.947720.4564870.6819935.37859  
39.0599822.3489622.9628514.5354924.0728314.9028914.3708718.831815.583012  
CHAC1 1.3238071.03527 1.8310980.7073709 0.2507245 0.1339728 0.2470224  
1.0610760.3051678 0.1250133 1.20345 0.2451576 0.2996120.7322952  
0.3433387 0.1973885 0.1809221 0.9955728 0.2796191 0.8227263  
2.7644762.3825531.2076585.4273980.4982223 2.2438920.9755518 4.322755  
6.149 2.1559631.8981266.7851220.9961871 2.0933226.3929140.7204308  
6.14981916.431771.15083 4.3927091.4059111.16209 0.7211383.7896470.9802827  
6.9323971.7070213.62051510.172892.1842423.68461 3.85979212.211163.284304  
2.4404952.7455361.8062435.7577482.4489971.0967842.5953136.8827577.050513  
1.5061788.4672914.4676661.5430520.7401036 0.3271641.3193246.824737  
7.1954214.3769683.3828251.48833 9.2281130.7780263 2.9910040.5972604  
1.00048 1.6151850.5877728 2.8586031.0814671.0479981.8638183.481249  
0.9759956 1.1663863.3745794.8953771.1344671.7725331.0349871.56523  
3.0761934.9589735.1133230.7054217 1.4599371.19092215.318172.519039

0.2722649 0.7122645 1.3931742.6620620.5464383 20.720581.343988  
3.0739621.1167261.4477216.4968373.0111653.2590595.5609981.0386951.532694  
1.8565131.9456780.8747038 2.7598528.4571972.2287982.3650750.4141072  
0.5053877 0.8082795 0.5015479 0.7374313 1.3878190.6446171 12.9171  
6.4351461.5548282.3334086.6315636.8510515.6906041.9736561.3604342.516398  
7.9894534.1062376.0279531.1186511.1553210.6962208 2.1962432.599368  
4.0852510.5845921 1.6057030.5224449 0.6455733 2.6298990.8204202  
2.4270841.12919 0.5687026 3.2161190.5926302 1.1713661.3641846.256795  
1.1345871.0388353.7470753.17922 0.5439941 8.4364071.60144 2.306795  
2.3175769.2483870.9904307 1.4925052.7485032.7186340.8574758 1.348251  
2.0681411.81478720.894631.6603432.6468511.48363 0.8884787 1.554316  
6.1724934.9866063.08888210.487371.5435312.7139642.1888995.5740850.235081  
3.3190463.3260512.6474250.8996362 1.3875771.7195150.3424283 0.8657658  
3.6412222.78479 1.5515783.2119122.2760482.7284470.6687278 1.54203  
4.7152543.0877970.8658736 4.4075984.20772 1.5019520.5195955 1.963729  
1.4215416.0679981.4747151.1072444.5186051.5371960.6993307 0.3825459  
2.9323331.1170753.2569661.7410471.0620331.1656041.08195220.614482.136956  
2.1250390.1137858 0.8756576 0.4760004 1.6062521.5962871.045928  
2.7961541.0556085.0950781.2077766.7081481.4481192.0087560.8773704  
0.5459381 2.0989142.4238214.1830141.5040251.9544012.9492972.057762  
1.1912812.0815612.2572310.9237511 2.1315540.6575063 1.20028222.38439  
1.6998335.5085430.4104972 2.5600923.4368838.9408891.6726832.225483  
11.814123.1926825.79746412.746183.4935342.6876345.0930162.2603484.947688  
1.4871231.8912391.8056128.1974520.5903444 1.0568225.1433372.33753  
4.1176374.0270690.7075489 0.9102651.96564 2.9575473.0334821.3943336.6584  
7.1798411.5286161.1414523.1490471.4314380.5632599 4.3756411.217752  
2.2510166.1227626.0711682.44544928.4709515.889711.6436831.5496571.56794  
0.6541801 1.3448382.1243352.0495494.2864111.6993531.2974734.023256  
14.234292.1813872.48389 1.7947834.5101252.1321080.5306246 1.247024  
4.4594922.7087485.2638330.8341982 4.5885242.1238042.3743370.9330529  
2.6545675.7360860.3127491.7302731.6594395.7265050.5057444 2.911249  
0.8431051 0.5931943.3983466.3450331.8264892.9149922.4410340.5017457  
2.1107415.0626232.0265921.29607 1.3969052.5160492.1393540.3876231  
7.8437140.8089584 3.86015 0.9382870.6143852 1.8313541.49782 1.962409  
1.6992092.40183 3.3713761.2932861.06220316.115910.2067848 2.233119  
0.6020303 5.0990461.9045331.59837912.863422.7096043.6117490.4466506  
0.6863631.7761921.1218632.8671462.3830831.6802462.2830832.6720895.536041  
1.4268 2.62052411.189471.2601331.9955971.2953981.0524592.1454872.569604  
0.4598356 2.47791 2.2346083.3051412.1234932.7774110.5311909 1.189998  
6.7452071.1755192.8027786.94272 0.7401529 2.1388866.1557621.378254  
2.8809464.069703  
CISD1 6.1568469.0341334.93428112.450625.555 4.93786 10.4052 9.415912  
11.4491310.914258.1763368.6620287.4642598.38054111.747664.1066674.553219  
12.560037.4870596.3382286.1720916.7840867.2747036.1605044.5036869.349381

3.22814311.2378212.443949.3252978.4392475.8541595.0778578.2286044.307946  
2.4142564.7403144.94221513.9189110.8692115.0621910.208483.7599138.010453  
6.42581 2.5771458.7180014.2451785.8114184.9739385.6346466.9750267.279242  
5.1579998.67541 4.6558554.60807 10.283273.3278627.7660535.31857 7.478478  
3.3548414.83297712.881784.93145 8.7792384.9387146.7659526.87061 7.16301  
5.3479554.1911118.4590755.3124146.8525629.3301485.8163393.8428867.542479  
9.6006585.00374611.8607314.277638.59592 20.438618.3031716.8156297.697737  
7.00099 3.0234784.30578517.981384.9718114.7015674.6470443.5000679.781622  
4.4110932.9937357.2305672.3308122.9959055.0463756.1686325.5737889.125621  
7.92372510.3819410.558235.6194478.6520975.8633456.38169 4.8000298.991051  
16.251332.1582975.8273172.7277657.4952036.48983 3.4149066.77713 2.140645  
5.46919 9.3635956.1972986.0056246.92544 8.1309578.1196267.71520321.77316  
8.6419338.2554734.9895745.7898515.7536715.1828293.1961022.7702996.153085  
7.7708716.3226436.8345788.34245 1.14241 6.1416056.1317416.5215477.857777  
4.67424113.306054.8335646.50225716.6747614.235196.6346357.2889818.93797  
6.87047818.9730213.840785.1277553.0075863.7231844.2563473.6269879.005404  
8.77936 13.7625110.676459.4925154.06470810.9184410.379444.6517614.650575  
9.03487 7.2130225.03511910.111899.14301211.9297313.289684.6530664.109157  
7.4501344.65846 12.9955 3.5200118.6049025.55892 11.992218.0675532.969533  
8.7517248.5333919.1975058.8445836.1089784.78513 8.65141317.174658.637705  
6.5774777.9420216.3052973.4283982.49043 9.9929095.4444715.9856776.586925  
9.4860664.5882184.8160667.18027510.242973.9176549.9473 12.143446.77747  
3.3561436.86123110.910596.3259037.3426525.87712 11.808114.8887268.056507  
6.3715424.7222167.61511 11.9780710.542556.34665714.674911.9720888.009057  
3.26749 4.5802667.9556057.45515412.605295.7887995.60728 5.10976 5.333508  
8.0263874.6077027.63210513.198545.1697155.2817416.6521914.1088759.948766  
4.0498236.3858076.8759526.5452884.5541 6.0910754.4214827.83572510.53435  
12.2077313.133076.0280653.5399825.3373114.7268228.8348886.17649110.87705  
4.9343 0.6211786.2328026.3692168.6759277.0024858.8971023.30584610.61593  
4.99856311.858259.10833613.1074215.022485.5878866.0901365.50683310.47935  
5.5567115.5707726.2188019.1716595.07836410.126455.8653384.4910518.837671  
7.5324326.03920218.801635.3629718.1752776.17621 9.3464425.7340553.108284  
7.98587710.929258.2889139.4890768.71436312.4320411.1677 10.9210713.35507  
3.9845018.83617311.837952.4027197.7823018.1279393.31431213.257853.733197  
6.2960842.6083758.67801812.0888112.4033 14.266755.5035938.83047 15.61434  
3.8900565.59542316.842294.8445447.7498596.8673313.1402514.4961 9.194483  
3.18761 11.312044.77801212.7368 4.57697710.451319.7155242.62734215.74267  
7.2250275.2656923.6396183.24361214.368975.0190253.5757124.8263955.85951  
30.138334.1960394.1394756.0730552.70459815.024676.79106610.0918 8.662834  
5.01873313.2049211.201614.7807894.80033 2.8692884.1416346.03589713.02963  
22.021685.4027076.2372897.45832 10.761134.88316411.2395 9.7932694.638056  
7.6071014.0859066.7850467.5863545.4770515.3431134.29495 4.1988646.947101  
5.4625718.1352559.05351 14.799926.9222423.1158063.6061 5.0518165.722741  
10.1475 5.97877 8.0402864.0016496.5926814.1150146.9747578.7209515.807555

6.0145889.8664067.3927685.21518 3.5665376.3463216.6290353.282191  
CS 21.6014719.3214118.4214 18.5325227.4181217.8836422.5633120.6181521.72095  
20.8168829.8676325.0178821.9995 18.6036321.2038525.1721420.3195113.68611  
18.3780320.8307918.4805 34.1006223.1789429.4610559.4725834.9379327.60195  
25.0392736.7179121.6453 22.7224716.7595920.2535926.2927319.049459.457478  
22.2530914.6048 33.1819620.7425514.5235817.3147220.9961321.4221721.25734  
32.4519829.7540352.7738 36.2111821.5118729.6277431.7721123.6763729.28866  
14.8038332.7629224.8464924.3383519.2419114.5793323.8599322.8922451.28035  
18.4868316.7796225.2050510.4903116.9338125.3122420.1940129.1037619.20734  
34.2718225.1162118.1807916.9786642.1199512.9307119.7528722.8127438.89211  
12.3216120.8340343.6252617.6171932.5448520.4465541.6700614.0302227.39117  
32.4373327.5628736.1443519.0434423.2802922.2017533.8302920.1009117.36451  
26.4323429.2596226.6005430.1346134.1507323.7887822.4380120.0465 25.07344  
17.0357 15.5229814.6314422.9558622.1011532.9087133.7671 23.8198 16.13411  
25.3122727.5942726.3579435.5588634.9300918.3769462.0190626.3461327.20672  
72.5145520.7348112.8712720.8938719.4332224.2700621.7166515.7813524.62554  
19.9080823.0759824.6862620.6492317.0998718.5009232.4463724.3165525.44228  
29.6266515.4391121.777198.69057 16.4998623.6293818.9196518.0851745.92867  
33.7122627.0445913.5985 19.5090731.4403824.8468624.5847722.6791927.76033  
24.9636224.1086739.8028824.1515227.6584517.3959913.9617422.9902525.66782  
22.9755525.9213444.1817214.5023 31.5018919.7270924.5410926.2991 22.14173  
25.8494627.1744722.8248115.3173327.6026726.9179413.7421 15.8089614.07264  
25.0228324.9989623.3741323.9916822.4952328.5927524.2979515.8643330.91936  
34.5407126.2976321.0242514.3848526.6248130.7875817.3647226.7348717.72057  
22.0616623.4277438.4422828.8406128.5580425.7486619.9882813.3344434.9016  
24.7828220.2276119.0951223.5054115.2215520.0179320.5385119.8897727.38035  
19.9432 17.6736422.8778228.1544 16.5561920.6674815.8191624.4580220.46041  
18.6122325.7148632.8019641.5534822.5398431.2856839.0923811.0517329.79744  
19.7733327.1437711.7741524.9292327.4694529.5858831.7008715.1419243.73807  
17.0898412.4083115.1646423.8385332.6927722.2998 31.6448 39.9036818.1256  
15.0729321.1765 21.5466623.0676425.0819827.9641833.0168714.4920215.18041  
23.2010120.0358323.5483325.8640228.2068616.8692 35.6795922.6498612.32931  
36.7455927.3798518.5429 36.1507727.5347927.7283720.4021724.7049533.12362  
23.4283314.3077926.2564923.8949 9.90150627.7844427.7301424.6360814.93371  
21.3632942.6336716.3864820.8669222.6510516.9307621.3739423.8645318.48698  
16.6241614.3185611.4202122.5240141.9571726.0049226.8995520.6334726.46489  
18.8388931.9885830.6102125.4861725.7201419.6782627.0386744.8953936.7879  
21.8692328.3451323.0219114.9844920.6645614.2712837.6702617.5216623.14075  
16.3318625.1385711.7315535.3390131.1870927.8983221.6595920.6235917.6917  
24.9705225.7200233.6053123.4229530.2667318.0200916.4046335.1698118.79288  
18.6457315.5636814.8157 24.2149732.6922817.6863825.4019 19.4343123.14939  
33.1462316.163177.40344235.7179355.0152922.3359322.2817218.2755420.13978  
24.5335618.8082915.1275661.0157 21.1748 18.3710525.1416324.9396220.99554  
22.7702632.5520722.1858627.3061919.4631147.1447 24.3726435.5366923.33215

17.4857823.0140123.9753314.9206 32.4339923.8412521.1165132.504079.345402  
20.3338220.7151 19.2555624.0110622.0209436.7237211.2181 16.8429517.50863  
22.8641921.5681338.3694843.1506 17.1505 16.84 31.6611326.0048919.51388  
24.5262424.2794112.7407223.6926528.4446421.722177.41593826.1203936.77458  
16.0468922.2894819.2986831.4405719.7978 12.2719612.74907  
DPP4 0.5438997 0.5408039 0.9506662 0.7644852 1.0707090.4082438  
2.0443340.8162547 0.8463244 0.9116935 0.1517063 2.7850620.6755418  
2.3984941.3835150.6010876 0.4088355 0.9885170.3151116 0.03724012  
0.4831916 0.4920111 0.94274 0.5534536 0.1163979 0.6082421.014565  
1.1031171.4642090.9145065 3.4067790.7195168 0.01734296 2.957683  
1.1214120.1608677 1.9513663.6835310.9227821 0.9584762 0.3083974  
1.1917010.7054454 1.4208841.4729490.3983563 0.2449149 1.060508  
0.3931643 0.2533037 0.5956173 0.2004216 0.3165351 0.2353588  
0.2844878 0.07441878 0.1855285 9.7948091.47914 0.3595414 0.7583926  
0.8980051 1.0266452.6645447.0563420.5128846 4.5171 0.04009837  
0.2775096 1.5328690.1181594 0.1462487 0.4395901 2.3776690.4250309  
1.4453380.5357685 0.04551427 0.07070579 0.04504742 0.1760613  
0.2341746 1.5315310.3338767 0.4305811 5.19488712.361321.002495  
0.4929138 0.5128852 0.3897615 1.0607970.08054527 0.1195974  
0.2017541 0.06499986 0.6517478 13.155161.2456520.04816157 4.698521  
0.6260488 0.1024192 0.1376774 0.6525565 0.4679756 5.650969  
0.4002133 1.46452 0.2988330.03714616 0.6654619 0.2731276 9.123539  
0.3264751 1.1158490.05784289 0.5416553 3.1486160.5000929 0.3614688  
0.1033221 0.5120901 0.1967888 0.08568186 0.3360139 0.03734787  
0.5601554 3.9543320.04063277 0.9605887 1.4255 0.7212006 6.007637  
3.0027132.0143350.3774429 3.47383251.302760.3829555 0.04642541  
3.5686720.1161354 1.35918111.198170.3308157 0.6083068 0.04746757  
0.01320229 4.23793 0.04854442 12.704570.3314564 0.2216659 0.3353937  
0.3443474 11.6006 2.8693780.2301214 0.1486409 1.3722060.1714763  
0.2705426 0.6228173 0.03057214 0.2300599 0.07769285 0.9111469  
1.4914151.5393250.6853078 0.4690767 4.6494183.8128710.08871433  
0.1989155 0.2658164 0.3847599 0.2470237 0.9314469 0.02740134  
0.08604937 0.7970799 0.8610183 0.9513170.4134936 0.3236566  
0.00945062 3.7177450.07412402 1.5187540.1797192 0.5051756 0.7651668  
4.31466 2.9970410.05246105 1.37136 0.2587111 1.1326625.5513140.09217984  
0.1567210.1646957 2.0591333.2921520.5724690.9756744 0.2473860.09777334  
0.6553756 0.4358337 10.6835 0.005088033 0.7222575 0.1090047  
0.2964442 0.02251603 3.5243053.1602450.2663242 1.1823581.895803  
0.4201835 0.7464069 0.1079004 0.9390076 2.7498063.7480230.05387388  
0.5250247 0.01706487 4.5896190.3380612 0.3138681 1.5692491.5335  
0.04805744 0.1861943 0.18396 0.07647543 6.4782280.8394705 0.7618463  
0.7289595 0.6414367 2.09493611.381970.2742157.6004830.2319324  
0.05161259 0.07665322 0.08630779 1.5928050.03271105 3.1911150.2534247  
0.6926619 0.2620854 0.04244859 1.7436510.03724463 0.7485709

0.2229063.4741870.1947603 0.8234153 0.4095722 2.9956931.375073  
0.1181898 3.6964380.2529856 0.4746573 1.4425361.2445590.2353559  
0.2936028 0.7279324 1.2594671.10231 2.2778230.1456157 0.1073088  
0.007664904 0.8915401 0.7159579 1.7051160.5492134 1.41506 1.204397  
2.22124 1.0812590.5558276 3.56123 0.3212229 2.35425425.388140.3601404  
0.5150859 0.8482302 4.2676450.09002342 1.1177551.9040080.1449341  
0.7503638 1.0667580.6061248 0.3535602 0.3815691 0.03159954  
3.6491820.9397543 1.70503516.055161.2997327.8888645.7231591.802548  
1.5519472.9687610.0789344 10.654610.2868620.09301674 1.3729915.051394  
0.8528761 6.57934522.031241.5885640.1487747 0.3606573 1.289814  
0.9647059 4.1935451.3589750.8047249 0.9386122 0.3247001 0.1667537  
0.6187437 0.1073541.8111552.5617750.9675 0.0847528 0.2754275  
0.3018376 2.17181 1.5344521.7035610.2519262 0.4155226 1.265719  
0.1079299 24.540110.09658507 0.08581172 0.04701608 0.1657354  
0.1600024 0.2378990.5165290.7263047 0.3144727 0.5730033 0.09732495  
4.2623991.3242830.2276012 6.4025090.1001002 2.2478872.2612190.69264  
0.2191235 3.2989940.1539072 0.19557 0.1350816 0.5674567 0.8865359  
0.7529829 1.1522910.9865634 0.02137971 7.57771437.752910.02875603  
0.4004241 0.5215578 0.09399981 0.04467962 0.08615497 11.81473  
1.36444313.473360.7946618 0.5338592 0.0760292 12.736871.9357935.57828  
2.01693 0.3867508 0.2389595 0.01900719 0.5876638 7.1662165.211513  
1.6115913.3445510.6962380.05214714.001460.00765773 9.7714260.1366538  
0.2004799 0.3565471.3358940.3730706 1.0877020.2368240.1263218  
1.4807820.4688381  
FANCD2 0.9136971 0.1453184 1.9627510.1775384 1.1403261.2313640.6299102  
0.6682528 1.8709380.2180317 1.0413872.8153481.3355290.9019508  
0.1557025 1.0467521.2610512.9380670.9831993 1.4146814.4196173.533  
4.8632582.4163127.0647347.62985 10.411144.0361555.5611083.4963281.896281  
3.4768342.1588114.8210153.0066612.7891861.8570568.2993143.2053824.60878  
2.8301362.0469554.5002693.0801141.7887998.4406542.6512456.70523412.47644  
2.2846423.2964445.7007764.17293 3.7336441.8263582.94591512.185671.525532  
3.7764791.7712783.7876271.1822024.5070051.9538747.2811721.9625031.308874  
1.6501991.6202752.3429623.4452842.1484898.5992135.4280044.6298212.300295  
2.2180345.3607371.95203 1.4644683.7759631.6625861.7695369.7707113.380964  
1.9537622.8919473.4052931.5144366.39903413.849833.70925 4.06517210.05193  
4.1414182.4180687.0560770.8561314.4315992.77999 3.1943414.9781793.061697  
4.8770991.8883942.2267673.4953466.2562352.8166331.4992313.56609410.04291  
1.92326711.088185.7084924.8812318.4641513.6873872.2411546.0432874.372139  
3.1773193.2311464.7011649.3905642.1501131.8384514.0448212.8385082.811086  
1.0395263.6251273.3277 1.5796722.6858771.4692118.5797394.12041 3.376465  
3.5307993.1513013.8302351.4598181.6354634.5203356.30957 11.141093.570681  
1.1471632.1393664.5712043.0479096.48215712.340932.7872793.8615815.497875  
2.1916473.8268722.8949666.3676894.0616594.3187454.4079563.2748675.214832  
3.1648373.4712123.8046773.60921 1.37264 2.1666582.8159 2.6671582.75455

7.0197247.3223262.8515193.79421 2.1053133.2788571.9453324.1698521.117129  
2.6496871.6325482.8690542.3759480.7395035 2.0590333.38368114.66842  
2.8803543.5339895.6061235.4208192.0252945.0943264.9620382.5862447.958968  
2.4194194.4162575.0748621.6792484.1828216.9483154.4249885.7960657.356137  
6.50159 2.31734 3.0173633.9759070.7613668 4.3190763.6209651.650414  
3.3896753.8851574.0894594.6537753.4609882.1654943.5427453.7242682.235177  
4.8560983.9245845.0426333.0330271.7099662.6770931.9832872.3609497.812077  
4.6953892.5930965.5867613.10958 6.9308110.3833244 4.0190662.609028  
7.9815646.3902175.6177694.96514410.492573.3537093.5311646.1654085.235426  
1.8092711.42093 6.7276543.0798782.94710112.893944.4880746.4251092.009155  
1.4696652.4557995.6952532.5080074.6845666.4425810.8284006 2.165103  
2.5501021.9528625.4314373.2317915.29204 2.7760848.4400375.5131553.03179  
7.40247 8.7490583.3095484.38542 2.3350755.51339 3.2124433.0926843.335251  
2.8544523.5925145.0827981.7693376.9072544.9884182.8811145.3871252.699692  
3.2580375.1400382.5589845.1763422.8706255.2299243.3370132.7121182.078068  
1.4499853.4799522.32575 5.6223823.8164592.20892 2.6229219.82232 3.409357  
1.8338383.2504076.3876943.7305342.3510062.9370260.9135471 0.9495613  
17.658024.75055 1.1083466.4287954.9345933.3915735.2331853.8396356.670023  
2.0434313.2485632.6990693.1777733.9298835.1379935.7264233.2928072.591224  
1.8523261.5923974.0455345.6342661.3868833.2192233.1918272.6038677.530375  
4.03384 1.61768 7.9891211.94416 8.5703062.2334880.9553873.8568285.226655  
3.8150753.3412191.6238790.8411053 9.2720815.8837442.8207682.154497  
5.7844763.8316261.8831813.2045452.43736710.763062.39205 4.2413635.288665  
15.857334.72347 1.1425178.5613662.2884312.3186743.42617 10.484921.746917  
4.6153920.9991238 1.46419610.959633.3591792.46546 7.48857 4.853793  
1.9883762.9331145.0695051.9857082.3668946.4997 2.6724132.6620786.983378  
0.9432118 2.2922021.7856462.1900521.9622352.7839952.5878596.5228985.84119  
3.6964053.7987822.7300042.0976463.7635731.2782743.35495 2.8591913.366881  
1.6503792.4735163.6988 2.1568711.5501022.3137563.8610853.3855892.088674  
1.595592

GCLC 14.726016.48443619.618615.2165656.81573318.5836 7.3142348.5506235.64611  
8.75983311.9787216.7492623.8851520.639356.60869742.3869815.717552.464708  
14.9029422.2787 3.2832785.90300540.3269 22.7129917.482073.14491 3.280459  
16.711752.7173748.2549658.7412932.9165016.4216517.95355510.5695412.87849  
6.0057725.7869237.62829 5.89623415.378994.1332043.8204216.42316612.72616  
29.059312.36545 5.7074734.78113936.881058.6491846.97951816.717675.804247  
26.9159513.0724729.988275.2234875.71115 2.85722 4.35032910.9852413.07426  
1.7344695.8909214.4895120.6507955 29.4507317.094812.94004817.58061  
2.88122211.3920336.301152.7866721.2259483.57609875.457882.61431115.80071  
3.24105926.2519127.266335.5390733.3232214.0774644.3644715.6389965.308068  
3.89626411.258035.15220910.9487510.8035532.3930817.8550519.158932.299188  
3.12425 4.8225984.15158720.7829326.394768.8133476.3847236.8924771.951683  
9.60208 5.2807042.28009 14.629923.34372619.7256437.043018.8648942.165686  
5.31791554.607133.2618046.5207544.33234 37.994816.8601413.99004828.25799



14.59056 14.22832 9.57177 2.11.44747 15.49465 7.48481 25.27417 85.73242 92.52822 8  
3.14590 57.85771 27.61338 15.98727 82.65035 513.80638 11.27141 4.75243 18.24510 3  
3.69089 95.79839 44.14884 549.78137 1.95385 613.75793 5.48070 310.68472 4.27758 6  
1.69169 121.25399 12.78799 20.46353 3.64842 28.27453 85.54392 919.04284 7.23156 7  
18.9103 33.35962 3.31525 13.27213 323.9918 10.53649 4.45220 35.05301 56.90090 4  
15.85297 2.29231 210.69945 6.16731 20.67741 6.68960 516.67103 3.01502 411.13777  
3.76943 8.69518 817.14434 12.09907 26.65215 3.08211 29.97885 811.25112 16.71351  
2.2214 7.01611 79.91057 98.35160 438.14297 8.77454 32.95364 72.12922 95.33840 7  
4.06374 8103.1481 3.36738 13.37888 76.35061 35.34499 159.76931 3.52363 86.02574 9  
1.96717 310.18277 7.57176 740.98525 24.57445 56.86075 4.05720 830.89152 4.65356 4  
15.39896 92.6241 16.86078 4.34500 511.24813 5.10950 19.25294 63.12092 6.15518 2  
1.91436 49.29452 911.82308 11.88378 26.40565 14.36303 3.91897 6.98731 27.00648  
5.70252 9.15453 63.34317 75.59355 55.7492 22.83763 30.45684 16.22887 1.87760 7  
73.88027 19.59491 28.81266 13.45829 9.87297 89.39705 55.6428 4.33828 64.24591 6  
55.44762 26.56234 8.64580 45.91689 623.71687 6.58805 88.91939 810.58514 118.367  
15.54133 5.34771 86.63744 820.48855 6.37848 49.49282 414.67808 6.26519 110.59142  
2.58335 67.82214 96.90203 37.35390 66.69314 19.75183 82.74820 29.11564 729.71831  
5.70726 33.01207 911.67952 17.75447 6.93383 81.10992 9.26674 27.42646 416.39644  
59.5728 7.53541 98.01341 3.35799 33.16198 54.33695 32.25247 625.85891 6.93239 5  
2.47159 110.39701 4.29080 63.43509 84.39042 3.27611 95.29158 77.21731 75.23332 5  
2.89683 32.19888 42.45190 21.75468 59.37360 74.28035 624.27558 14.61315 24.15702  
17.56043 3.62016 8.54946 92.87042 12.18615 17.89542 86.12825 4.58960 83.53955 2  
76.0487 4.02560 37.29893 620.49472 1.93692 92.46101 37.73320 828.70809 2.69737 9  
8.72034 415.02684 2.93694 82.97091 5.84529 721.36487 5.21149 45.54846 9.65405 3  
7.80999 97.90395 135.17083 6.00035 42.72275 53.58578 711.58778 12.88372 2.54879 9  
45.23597 2.43428 47.71967 33.39262 611.00601 42.12829 5.92056 28.31874 3.03027 7  
5.76612 9101.0773 11.97008 5.92213 43.77399 92.98976 811.29267 4.22813 96.69067 5  
4.76776 917.29422 6.85326 63.09833 19.04270 63.85420 79.14197 5.11586 27.18727 1  
121.4102 4.58448 82.99281 517.03244 16.56784 10.59656 10.34187 2.66948 57.49584 2  
5.61673 94.07368 510.38642 2.40554 52.74287 928.81703 30.90052 8.02987 213.21746  
11.01562 14.84139 3.61640 86.56153 73.12112 32.96021 330.00493 1.01248 72.75901 1  
110.6522 2.92376 52.70461 65.35641 3.78333 510.38075 33.2169 4.46550 96.88645 7  
13.2001 4.64696 22.00932 98.74883 42.44430 67.28127 61.94654 31.84733 10.40955  
14.30154 1.88310 86.77458 31.96470 39.34640 710.63999 4.36513 78.50327

GCLM 3.84640 91.56115 62.75266 43.11216 53.36954 93.34470 92.05457 2.81598 4  
2.58301 810.23888 37.78194 6.58594 33.67652 35.79218 13.00346 37.49493 63.25022 6  
3.74348 53.13361 25.41922 718.95232 8.10884 85.74051 744.50218 13.05324 11.12571  
5.78494 57.99671 314.65101 5.00273 68.72115 9.92252 1.20849 93.89869 36.77098 2  
4.29058 92.43922 93.59576 34.90540 46.09690 65.24330 71.49594 913.15638 5.02452 1  
8.58228 418.76087 2.12282 35.72007 715.76662 17.05554 8.56257 94.08418 14.66561  
3.73757 28.34431 96.39612 912.80233 3.20611 67.43916 62.50758 63.64670 210.73296  
59.26176 7.93574 35.74026 916.45502 1.76229 5.85820 52.27212 94.54964 411.31054  
1.35158 76.77205 94.25751 4.06232 3.33464 16.90137 9.43611 34.04749 41.02517 5  
4.50165 916.01487 55.47825 4.45670 211.2853 3.96882 69.03128 611.73536 2.28189 8

3.7763186.1133056.2000095.40912513.3051613.393696.3141197.5046512.307884  
8.4686821.6549431.5335431.9195093.3477199.2962734.4764187.05922 20.07757  
13.5857710.050124.4367695.1837327.3897089.3337928.81458418.097813.978844  
0.7840309 5.92734 7.1317292.6236367.94031510.0137 10.732824.679158  
6.2135155.5812161.7142834.46721 4.6661321.2928475.04011221.302129.496851  
4.12359614.920227.2225794.27655 11.384564.08494312.269086.4471854.793112  
2.74343 20.710087.5978 5.197408121.78041.7108562.6801874.7677443.673182  
3.2467711.29631910.4038 6.1682189.9083028.9942018.4966394.2219183.13452  
8.5158524.71224720.718938.9627412.38274110.006744.1549074.4480616.576327  
5.36724282.800571.1278847.32791614.497674.57488 3.21941220.5292513.0751  
7.2482655.8892352.42381910.994227.3767967.4978815.94593 4.87798610.83988  
3.7512432.8822963.9468376.1263485.62336940.1696214.571592.10363 4.537021  
2.9678473.476816125.925510.6364412.613447.56059710.0866567.638331.958725  
5.8864365.3265416.8614224.1381424.73482 1.95954762.005328.1501796.065846  
9.57904637.433655.13463 1.97265813.832839.8609294.44832817.422484.958691  
7.6615714.3453135.8066714.10723945.3142360.162163.47967 5.4176852.466558  
5.95374 8.6568011.7673872.9264014.1810188.1109679.49614732.9588 9.02006  
4.5427 23.430165.4707467.3826014.88890528.086477.0853666.3510475.459202  
3.79340714.2047 4.86438711.6803 2.1305586.50820911.936965.96404310.57911  
72.439 2.7591565.3584111.4146774.4834392.3206875.1292216.5904594.759396  
15.7325 3.1834682.9495132.0124326.1899224.4500249.88222 5.6422093.329969  
6.8080265.22133533.711075.72756810.900325.35737 61.033956.03667 5.100244  
3.231368138.76497.0167628.5083177.1015847.92662610.881432.99780118.066  
8.4374417.7184784.02434112.337527.85992812.203335.0534773.0667857.703278  
2.9542873.8263212.8931843.8044182.99718911.286442.7684614.6012041.995561  
3.26596520.796553.00975 6.18820410.850892.14224312.150484.20257115.10281  
3.8360147.5745157.0775992.3033143.35256733.7477912.105765.70024612.55678  
4.0547985.7834376.5398898.0511254.3955276.38190110.122583.9122235.91006  
5.0207426.3058075.43661315.908446.7896417.7906485.6726598.54242159.86126  
8.9296 7.4167663.47482912.762854.2781 6.69073989.589584.43038753.11068  
22.9044 3.2252979.0060281.4539322.8638795.23841 8.85299126.7863225.04904  
4.5479899.7941481.87657520.943714.4442996.19340822.579951.3795994.911077  
18.4374111.442092.0156543.9009057.9806994.2831942.6600168.54107810.57251  
2.6812 4.1425667.8517946.7218347.7752214.28283814.9657776.7475113.82351  
5.8204093.7758831.0271216.9960377.8577575.7902298.4569844.8223580.5445452  
2.62479721.488469.7097666.51562817.895 20.748842.41091667.2087713.06474  
17.140527.1026 5.8653654.0893142.3039818.9623952.8449714.4664688.486775  
3.0486565.3389526.2803214.46766 4.4591377.96334 4.7945048.4545445.175192  
GLS2 0.2181105 0.02940056 0.2564607 0.007642396 0.1510369 0.2940704  
0.1052276 0.09536912 0.01895784 0.02485171 0.08835457 0.1949421  
0.3195937 0.1076434 0.006562806 0.1442624 0.6912209 0.02061588  
0.1627882 0.3776940.2049454 0.2665741 0.1913085 0.06227569  
0.2670274 0.5367636 0.2045381 0.3233644 0.3602285 0.02480263  
0.06318981 0.08665679 0.1258694 0.2259566 0.1145465 0.09729367

|            |            |            |            |             |             |           |
|------------|------------|------------|------------|-------------|-------------|-----------|
| 0.09246906 | 0.06447067 | 0.2859705  | 0          | 0.01184257  | 0.03286796  | 0.2815938 |
| 0.1595216  | 0.04175848 | 0.07709701 | 0.01346599 | 0.1305506   | 0.2414463   |           |
| 0.7791288  | 0.3001939  | 0.06060805 | 0.05743266 | 0.09015267  | 0.1184674   |           |
| 0.1563467  | 0.3259394  | 0.01106248 | 0.1766147  | 0.01739621  | 0.1310515   |           |
| 0.1671134  | 0.05247216 | 0.09279449 | 0.1760468  | 0.03918259  | 0           | 0.2667689 |
| 0.9598315  | 0.0752419  | 0.08795507 | 0.08845206 | 0.2548803   | 0.01801287  |           |
| 0.1293598  | 0.06155974 | 0.2505151  | 0.2936244  | 0.1509292   | 0.2111482   |           |
| 0.8245598  | 0.2301490  | 0.07387497 | 1.0749380  | 0.07803847  | 0.01747592  |           |
| 0.1122805  | 0.1490585  | 0.4226845  | 0.1645662  | 0.1594218   | 1.826784    |           |
| 0.2314663  | 0.3609818  | 0.2096655  | 0.3267083  | 0.005993458 | 0.3878773   |           |
| 0.1324018  | 0.01102856 | 0.05790932 | 0.1434486  | 0.2498041   | 0.1261316   |           |
| 0.06081728 | 0.02362491 | 0.4014508  | 0.09601623 | 0.07072272  | 0.06418915  |           |
| 0.1736998  | 0.06607564 | 1.8613970  | 0.09699492 | 0.03936751  | 0.02332247  |           |
| 0.2183975  | 0.02704332 | 0.1222056  | 0.1009008  | 0.2879964   | 0.7300424   |           |
| 0.1734276  | 0.0712537  | 0.1208353  | 0.0050196  | 0.3855141   | 0.1487777   |           |
| 0.09829972 | 0.1374336  | 0.01604001 | 0.2513615  | 0.02763082  | 0.05188735  |           |
| 0.3614338  | 0.2739355  | 0.2434627  | 0.05378902 | 0.2925646   | 0.07861938  |           |
| 0.09751594 | 0.1130682  | 0.1189115  | 0.01619622 | 0.5695949   | 0.2207444   |           |
| 0.0469778  | 0.0851714  | 0.06774777 | 0.1247797  | 0.04319774  | 0.06391691  |           |
| 0.4660347  | 0.3407846  | 0.1125747  | 0.01815293 | 0.07645004  | 0.4742386   |           |
| 0.2724207  | 0.1336091  | 0.5490520  | 0.02181676 | 0.3668994   | 0.3389870   | 0.2903823 |
| 0.2506084  | 0.1318166  | 0.01058083 | 0.1896016  | 0.05367341  | 0.04519118  |           |
| 0.0487277  | 0.03953222 | 0.09300187 | 0.1295595  | 0.4168040   | 0.1454406   |           |
| 0.2134304  | 0.09618074 | 0.0946999  | 0.2276887  | 0.3092578   | 0.1986361   |           |
| 0.09242761 | 0.1083310  | 0.1879194  | 0.2057684  | 0.04286965  | 0.06897019  |           |
| 0.2310821  | 0.2173904  | 0.0596162  | 0.3470829  | 0.1643799   | 0.07934057  |           |
| 0.05439212 | 0.1216462  | 0.1585562  | 0.04957527 | 0.09784026  | 0.005575089 |           |
| 0.07153639 | 0.05363554 | 0.08337241 | 0.01547095 | 0.1680740   | 0.1067788   |           |
| 0.5984816  | 0.2507276  | 0.09685177 | 0.3122189  | 0.4620199   | 0.215409    |           |
| 0.1149540  | 0.10788    | 0.1002488  | 0.1852023  | 0.008424977 | 0.07044683  | 0.1335739 |
| 0.05959138 | 0.03199792 | 0.1728080  | 0.1228384  | 0.6074083   | 0.1199328   |           |
| 0.0615250  | 0.04383364 | 0.2317029  | 0.05663096 | 0.2188036   | 0.3588265   |           |
| 0.0851922  | 0.07063411 | 0.05810757 | 0.1479021  | 1.1408170   | 0.3561662   | 0.11126   |
| 0.2312639  | 0.04039246 | 0.4195032  | 0.4907807  | 0.25044     | 0.02615356  |           |
| 0.2848941  | 0.2107675  | 0.1760007  | 0.04001975 | 0.1109144   | 0.4307751   |           |
| 0.3134839  | 0.1696482  | 0.03549137 | 0.8591834  | 0.1424527   | 0.2547349   |           |
| 0.2015884  | 0.1774157  | 0.1625966  | 0.06817423 | 0.1531752   | 0.4759573   |           |
| 0.3521693  | 0.03125763 | 0.7309150  | 0.5239140  | 0.0632455   | 0.008903252 | 0.2926183 |
| 0.2685984  | 0.04863834 | 0.1734080  | 0.1607622  | 0.0267932   | 0.5281156   |           |
| 0.1081819  | 0.05073504 | 0.00779217 | 0.04024248 | 0.2898623   | 0.1112223   |           |
| 0.2767889  | 0.8206835  | 0.1576164  | 0.4493404  | 0.2319725   | 0.0401047   |           |
| 0.07381496 | 0.02142939 | 0.08324866 | 0.4941308  | 0.03089535  | 0.2029692   |           |
| 0.09741038 | 0.08511202 | 0.1194853  | 0.2153446  | 0.01117     | 0.2653747   |           |
| 0.0524945  | 0.03733954 | 0.06929576 | 0.01578268 | 0.4263724   | 0.05843796  |           |

|            |             |             |             |             |              |
|------------|-------------|-------------|-------------|-------------|--------------|
| 0.01260623 | 0.1088257   | 0.2322932   | 0.2177231   | 0.1775193   | 0.133781     |
| 0.07863159 | 0.2126549   | 0.03819313  | 0.0915669   | 0.02933153  | 0.05056216   |
| 0.07755187 | 0.1129554   | 0.0257599   | 0.02216695  | 0.1551549   | 0.01931259   |
| 0.0447731  | 0.09751221  | 0.01415442  | 0.0400233   | 0.1754866   | 0.2234451    |
| 0.09565667 | 0.1902136   | 0.0782433   | 0.0376082   | 0.05200579  | 0.07911316   |
| 0.09374338 | 0.07615195  | 0.1104572   | 0.04708849  | 0.1854704   | 0.465047     |
| 0.01919075 | 0.1242107   | 0.004731734 | 0.03506366  | 0.3780965   | 0.04299139   |
| 0.3466667  | 0.2534266   | 0.005473012 | 0.3770183   | 0.2066909   | 0.4113893    |
| 0.04349603 | 0.2679299   | 0.1255320   | 0.003929572 | 0.5919406   | 0.2205725    |
| 0.0699953  | 0.009324437 | 0.5376131   | 0.3836870   | 0.3800325   | 0.05222128   |
| 0.2104283  | 0.06729236  | 0.5565198   | 0.06695903  | 0.1758913   | 0.1529494    |
| 0.02520601 | 0.1105534   | 0.02844215  | 0.1860972   | 0.1570922   | 0.03698432   |
| 0.03485153 | 0.1295081   | 0.2678079   | 0.08798256  | 0.1041172   | 0 0.00765392 |
| 0.03648755 | 0.1403951   | 0.2379224   | 0.1015022   | 0.006786497 | 0.3378979    |
| 0.04748603 | 0.08956969  | 0.4169118   | 0.07806496  | 0.1875852   | 0.1681871    |
| 0.06112763 | 0.2175343   | 0.05450283  | 0.1145707   | 0.02299144  | 0.02275165   |
| 0.1338032  | 0.1742215   | 0.1252525   | 0.03742545  | 0.4072950   | 0.1322001    |
| 0.3554224  | 0.3737694   | 0.1582129   | 0.05764352  | 0.09695354  | 0.06264129   |
| 0.08491215 | 0.02629184  | 0.7456615   | 0.04254725  | 0.04628343  | 0.181877     |
| 0.07576599 | 0.09367609  | 0.2957906   | 0.03610143  | 0.1946493   | 0.3003315    |
| 0.1159333  | 0.06345308  |             |             |             |              |

GPX4 72.6317360.52713141.953456.2093739.8995388.0588679.8067286.66387  
58.5834658.1135960.9724185.2510766.30892132.834958.0682483.4985691.37856  
198.2109143.365389.12809323.4019256.1448143.686833.6085487.8175665.675  
63.66465108.2506103.9663194.3561103.6826131.9253176.598882.37655154.6625  
86.5412 93.62991130.3644102.586 112.3944198.067 79.32548117.120880.23329  
75.8121296.45756161.4144278.727980.5766771.98206157.5274104.7793103.385  
85.63025242.3537110.184 168.321244.9853398.66302211.0823181.984 147.9511  
83.43034106.5174204.7293154.2857217.079 69.6203358.8652472.5976288.34953  
166.7995113.791283.2486561.90774130.565464.59489120.006593.4452599.64761  
113.723851.12546111.144855.0493771.8428486.04863118.469548.03828306.061  
118.0217110.462868.59332163.999990.53704115.8537177.655 60.86109171.2001  
91.45678169.821629.31519107.8458212.263 101.0828156.804385.0611658.68716  
84.17868116.8686213.035190.98534173.281893.0585461.38507179.712172.71518  
481.648 115.557495.06919134.1456140.7081108.5857114.3414118.19096.064911  
92.03695268.644989.0969979.26152110.650299.3066454.30688122.4271209.4002  
64.4722475.61324117.257361.07738110.7524191.7507153.5019145.218276.43016  
193.849647.91242113.076 62.8484386.12815128.0025114.1874113.096362.49568  
146.2181130.662636.8615379.8541614.0736799.6413185.27785255.567275.15917  
103.089592.93848131.2188118.1196179.095582.81852116.419151.02011134.222  
119.8214148.063661.9968954.85142179.0246117.5406191.116758.1289 51.47929  
89.7100577.0902682.1374283.38149112.3559112.4248123.2815113.5828113.3513  
95.18023118.0758121.6163130.563880.44593110.4588125.7928182.156 199.356  
194.994396.37936105.4972145.6033189.7228105.185293.5847976.0300379.98158

115.9784145.177250.5804759.5167186.2852776.0670584.7297759.53035127.6787  
49.40324119.5554104.303158.6302293.18686137.174431.8288660.54204164.2479  
108.814473.9760497.06239145.33 87.52744103.2578152.5975156.612154.41928  
85.81015127.7768123.281378.46641105.903697.33943129.885 57.05348167.6297  
131.795161.08388163.2036125.5744131.728794.3558879.1587749.43523224.2621  
88.48068112.5271109.096 204.6117107.7607141.3267137.9485122.759180.85942  
68.66345120.1283105.2544135.6674129.518263.68961119.1737174.2079179.2804  
202.6938204.8878143.438276.5713795.1502 170.8639100.640181.5866 77.74069  
82.37259152.5229202.7014257.031492.4191676.94892142.9461208.644682.06883  
66.94742112.560661.4565379.72345123.309470.1827997.7539 69.1566582.03237  
91.17661105.889 48.7408 156.119 141.364969.09286117.2692115.102332.24103  
77.60079135.5584250.0104211.8624215.721794.9564 142.042587.62091101.647  
78.73058102.405851.9195897.0371574.5253 175.231237.1168828.5765686.12542  
41.07551172.7674178.5105150.2762103.7372119.092 68.64765162.6927130.781  
79.96093124.499 330.1532201.2896125.307161.85725109.569237.4726997.00846  
93.6462 78.374 80.11835143.000396.049 129.6108139.488365.4808668.93187  
58.11866124.970529.02738290.145473.19667104.2084152.7983131.8545119.3065  
128.293 85.5696693.9789161.8488499.51809262.939 220.571971.6417554.45525  
42.6750667.2785641.9824196.08988119.4307111.2151185.3277127.5559133.218  
181.8945172.2929243.428690.2122576.20319124.0103109.454133.3031 47.8092  
59.94405120.2058181.179493.3834398.3531466.14396268.3415114.1551128.808  
258.1382122.3367129.8944117.804371.67444140.1798142.5298253.1638164.8872  
112.105770.597 144.9892134.2791107.8972114.6351139.4168129.160579.81186  
109.855158.53515216.5715169.2598101.6306120.6392148.2284231.244669.05625  
83.34071353.329180.9206 136.258597.0502386.75655170.619869.33381  
GSS 34.4508910.4993236.397099.07262526.1632 26.6343715.0765915.8941213.47891  
8.83470636.1395426.2373734.8746627.609587.62132 28.8189636.3716955.80314  
39.8379640.5009452.6601627.6217962.5219439.0280563.0652751.1738641.80774  
337.794 44.6658252.7325433.9290643.9891751.1191361.0362536.2916446.10003  
34.6550239.7727881.9653145.9989899.8662137.4813139.2701343.9151639.31678  
36.0764854.6215 45.7132743.6418328.9332 106.038929.8313839.0056639.59354  
47.3654770.9841348.2937549.4722632.8819933.8949536.7505847.1665840.1965  
41.7983218.9037 25.5370344.8685836.6540634.8392946.5489249.9810363.67837  
85.4869538.3434919.4238825.1337826.0718636.2439461.5675845.3457 112.1806  
41.8049938.9465945.6523553.2798946.9026260.4395243.6020948.3272 15.84151  
32.3705833.1917683.7199950.53495348.988488.2002538.1025133.4706633.33126  
64.1271558.4370129.0419645.4745457.9023953.8511 48.3005833.4077 13.96618  
71.5251399.6864559.2327 38.0904138.1845867.9767657.0211834.1212184.78242  
50.1770127.5207634.2020654.0585 66.8145245.8761386.4240726.0282824.82725  
46.2984243.3925836.8467158.8774435.7478828.2948869.2353833.8931733.87318  
55.8663667.9911950.2205150.0064829.0305762.6088636.5995435.6775748.1318  
55.0994947.0455319.8166540.0923564.3411 31.3336866.6726455.8424 14.87275  
43.4094476.4822459.8116567.9944149.5568548.0227167.8382557.6835856.41343  
38.4029 32.8213347.1677572.8866565.8054898.4147344.8638881.4489532.07104

47.0600432.4404 39.9178444.9610744.1837766.9919481.5560343.0028535.20834  
42.0104961.4883747.7975362.1824134.1122938.7248788.5331782.7802 25.58477  
67.0623395.9773668.4226544.2277869.2711343.8864336.0028853.2429937.15722  
58.8744 60.0279167.1451731.3264533.0217238.8443925.597 34.9592159.95258  
22.6667454.8497532.9113835.4120242.7099142.0084950.9586679.8162838.58344  
63.1767 38.5761733.9620942.3544933.4850417.4505149.8668740.3309441.3132  
42.8727 29.1534288.4736832.9733137.0507537.0309148.1736137.7215 29.07414  
42.9726930.6100158.4872188.0155 44.6089968.5142445.1344214.4986465.94586  
35.0007 45.4595944.7219660.7458352.9069950.8198434.8186768.8789948.55797  
50.6557137.6336337.2940962.6584323.7515 45.3764 84.4495542.8304450.38136  
40.9345142.7084751.03553135.319823.2416537.9898457.9402436.1781259.11983  
70.5112844.4014127.6278251.8002454.4982934.0731748.3777873.1137441.29731  
60.5642854.3135557.7052935.4654539.9553825.8100866.6392938.5189 46.41392  
78.7905227.8525635.8049865.4220930.5745 24.4514945.4247940.3034460.14736  
18.4065445.5214946.1466541.0836345.3122934.2813431.3529144.6588425.19457  
59.6921 58.1912736.1973826.9165473.2953473.2143544.4567946.9969472.09941  
23.5461646.5947344.6792640.7129250.4047524.7126629.2070834.0205347.9228  
50.2642654.8884850.5192 51.3960432.2888154.3648359.0198529.3036339.35947  
60.1315150.0752147.2842 44.5872564.0477641.6684830.7072431.2251 50.58478  
48.9630649.7197448.5234970.4959952.0131471.8804355.2977863.6807132.84415  
60.6331818.6203264.7335 31.3258761.7570946.5520654.0707674.4786470.31215  
37.5151632.6025330.1547139.4440472.2297685.2096953.8867 32.2679852.38242  
44.8947 57.9004526.5679853.4786 49.1071232.6774468.0446146.5942768.35469  
38.5005 38.2576139.9970139.0436248.7712735.9747936.3412428.9821819.85774  
61.3893242.7583731.1394344.3183451.1855349.9783937.9583846.54556132.7819  
42.75087105.145854.9358235.2495362.5890246.5528451.4345438.1041250.16118  
24.4595834.7297927.0661955.0011847.9626540.3942139.7682 51.8885850.12941  
40.5814362.9074453.7859741.7012446.3304457.8615962.9795936.7397463.50029  
52.6433748.6954 68.5773483.5509964.1963746.5592667.18508

HMGCR 7.1924032.1989038.9214583.08069724.401368.4918143.13168 3.472471

2.9304953.25581115.8677 10.415417.76272 4.4672452.6061539.35447110.55905  
5.3113246.5528335.1023464.5720089.81018413.6989712.3703216.5302 13.85242  
13.552487.80095112.536894.5115368.8476057.6290345.05989710.290927.226427  
2.7123177.8732796.0568316.8594284.6760123.5152626.23826810.404587.344148  
6.58021312.871163.18515713.6225714.4420619.0968611.884325.9059577.538575  
6.0289245.48777911.440038.56577817.8668910.590924.9145599.6555819.360039  
15.014124.2331687.0833127.5666832.93800512.399128.8135956.19500915.48603  
8.68867818.282496.7210177.1605074.55695719.0175425.7632612.406092.473355  
10.831495.7681788.99631114.836329.42528812.149065.4051699.7823512.464517  
5.57356711.895446.3188768.37683410.0138510.928379.12113313.198215.590744  
14.278774.14625312.6757 5.71347 4.22283520.8469 3.2070896.4866415.72188  
10.258776.7525376.13108713.121436.2609628.3110587.36030211.8174814.2018  
2.9564018.0364698.54087812.665599.88831137.0962212.3005518.2415610.8482  
6.8690975.04018417.151554.9961176.11922 4.1262375.9501648.5020722.927217

15.548018.2335596.9053727.09549512.0634616.504356.2610647.3377328.576932  
14.189 4.99641725.449199.6746 2.8762044.4228729.97086711.910983.338744  
8.43615327.1934410.2015611.164876.9849415.42999 7.5217238.1135659.439815  
11.1862212.595729.71980312.028298.7549349.29651 15.8334812.7533 5.208678  
5.4967717.6480645.2244556.23818313.9853219.299665.99859717.5367211.50453  
4.88567112.8908610.511138.3846534.0491793.4025 7.5481845.17530710.26358  
3.1191535.3996224.87308513.073329.2551689.90941711.8895312.394563.750942  
8.3557069.41905 7.9966429.3736513.95608414.2873 12.441544.2287678.772245  
3.6731494.53835234.303598.52308910.6237912.3623614.2863215.004523.222007  
16.392528.9042744.6855218.6952945.90679 4.59654215.011889.6543777.348668  
6.15483 12.141338.6396998.6624549.4877678.0423187.2608516.2605875.359067  
9.2239588.2065914.1039569.65749614.9893112.528597.5614219.6870673.121925  
17.3636610.282953.78924814.620325.5414828.4116719.33405814.680195.364362  
42.853583.41255 8.9775953.74645310.707386.3164389.39830821.9397713.46243  
22.802027.1940096.4957736.28064510.027518.88373913.1893110.809955.481702  
3.13218 15.3273 6.7458177.58330810.609316.6778219.96369 14.6697111.02834  
3.45818116.341369.7140444.30686 27.2678 6.85714613.366265.7883694.61063  
10.874243.69519 7.2691384.0532284.96090622.411996.40202812.9193210.98795  
7.21935213.8524929.114185.31764515.206257.8156856.35969612.182597.010573  
12.877115.4589254.2375074.65097516.3819612.8695112.398669.53767323.05228  
14.4627 4.60967811.636317.9111456.0824188.89105114.9382111.699149.007023  
20.378794.42652612.0396712.644462.9833295.0963935.22620110.2821910.5588  
8.7655896.9128127.1665913.93722 4.4585917.90124 6.49464 23.709635.410384  
15.966927.8360157.70394413.7909 6.2675947.69214 9.38111111.6363916.00368  
6.5481766.77542 21.088253.9353498.9820175.5514768.6326849.2138775.767982  
12.345918.1868433.4103494.77142330.9538517.064463.3218039.74248311.5967  
9.4604615.90434520.332444.59571216.308337.6625113.9250677.4817588.281707  
11.7273112.395096.8909119.03889 9.22524813.3658213.4531 14.6325 23.91013  
3.9092627.73609 10.903814.0225157.16250526.5266 4.2808287.30944120.93847  
6.1256493.6558526.0575515.1216477.4153796.7281357.6996731.8944494.381015  
7.3877238.2449763.0188815.85170710.194157.3377596.98603712.0804812.48358  
6.9517345.0240635.2218054.1898739.50644712.824948.0113888.48932710.30423  
5.7510895.3573369.8490825.2999127.15269717.160164.3334653.440391  
HSPB1 1434.036783.55541104.8791072.0141789.28 457.6705422.236 467.8432  
525.9412472.38113258.007382.7236479.3908607.4941594.7912336.5129705.1401  
1038.882973.375296.09551650.273 882.8615544.74681215.488793.20191330.753  
601.5128552.90361097.296190.0909742.35251252.6952004.2191029.7181773.027  
462.3852522.3724730.7176755.8202300.88353554.2951757.6721288.523779.3173  
432.9044307.0594345.0188111.4392567.5933839.17281356.433458.98711145.705  
1272.213214.7064872.82361098.131926.90372098.836953.2431612.639 1430.593  
510.29841513.751354.99181557.096848.39271089.007661.048 155.5841885.6873  
585.8622229.9087201.5578490.606 2754.1381263.067292.62672367.43 1404.88  
841.63421509.5441423.313318.4142176.74871262.035251.0551112.7839410.6334  
215.5785735.3477731.2829785.5654223.1518834.3084807.4517753.0007734.2995

1120.5861465.836800.516453.126381663.0531338.4851105.655536.0437420.8  
84.20361634.2671881.0777933.98561099.2821546.36 111.0558569.317 880.88  
2300.4591109.473456.98081127.409298.1579598.4723729.286 99.67459224.169  
995.62192282.522753.7535994.09322038.063782.3003130.92271711.606459.8243  
404.8065953.36841614.147459.9169604.71141116.544993.02641095.865961.4734  
3071.3481169.0342289.63232.55032886.67831149.725579.43891083.092501.6683  
132.3547829.5399793.95321039.6 144.6495514.7164210.794 680.9988627.4029  
485.5995420.6708990.1248959.52 640.4084220.4466296.4404517.6847869.1418  
573.8659834.0601392.1709274.29091553.537109.57141730.824438.3225484.1603  
871.5853394.0003553.4825691.8841574.1048454.7822827.91961748.3521666.207  
910.44211553.107668.5931722.18561557.4331249.416147.20432047.9661559.238  
293.26271366.129462.3106440.8097338.4693448.2189489.8616976.0465724.5487  
803.34971352.1781005.118285.767593.843222450.558450.915 350.92321293.307  
1265.875173.50191681.457838.9306213.04441483.043305.2129902.6286647.6652  
62.94604909.0871564.04542342.968815.02471362.5021831.7851543.154912.8983  
2766.6532364.714213.908 126.6593416.96891138.458841.3779560.6982272.1284  
437.485 334.35091230.8881361.6171388.898623.2352547.13731954.3081405.287  
165.3532835.6979953.4295987.131 1081.611848.07961527.533914.7939880.5468  
893.9728827.5888992.1844753.42221196.791579.0201408.876769.640721255.55  
1101.9672491.832939.2032226.93561089.248479.5276562.1376171.4522638.5816  
560.0144700.3541172.4864956.61241936.2891738.19876.5931 688.4984893.9761  
628.44521032.929555.3775312.84742706.423205.3188175.20311072.159596.6346  
553.6379456.3571383.463 838.3922720.85652839.276939.3775814.3485885.0267  
382.95521199.0731491.9211763.466268.1869364.0102915.128 1664.448782.4396  
968.7037542.6285501.1764222.7495743.24851492.06 959.36931341.9241833.114  
493.6735248.55061360.065401.0417389.728 294.8906571.1959135.6037734.5865  
585.92063297.222683.8067635.1289323.28031241.93 1290.256937.29721516.377  
1108.544892.138 1668.6041723.941773.7396373.1045217.07021910.203863.635  
598.56791875.154131.73191154.2571409.731695.47031325.422751.0082826.6637  
591.469 404.00221012.3821477.81435.92347558.91671544.413344.68331065.54  
581.8385902.2858814.3906329.1274858.1474768.83021037.185249.5703608.5334  
466.60661825.593960.9348370.5374491.20771035.019207.5512935.45291371.628  
548.1953823.8532322.7278406.32921936.124346.4213244.00654818.2621628.638  
852.194 1603.457657.9834571.5746193.6454903.5509121.94842175.984431.4131  
822.7432304.9741462.2382278.57931941.678295.176882.64261380.2431321.414  
436.3141303.44771233.276738.0418295.59591302.162922.66965145.2861031.412  
1649.749429.8337985.2521964.8825256.0848474.61941368.7711079.701

CRYAB 19.04249123.322710.33165659.687944.2335521.0528 71.9463961.53021  
48.1100580.9270443.8862323.5222122.5585925.0811181.9149112.2786 11.8273  
13.8438411.434340.5864417 2.1859822.3691751.07516 9.1957111.192766  
8.3113321.3803250.2942324 9.03841 5.19293327.364481.7175561.242649  
1.5034513.7439452.4911916.84179 5.3773962.61886229.106097.1765962.249425  
4.57711118.478570.2089805 0.9010061 2.5914760.4028507 0.3495137  
2.6883852.7656381.0422953.1964811.2693192.1019960.8406355 0.5980129



3.8149592.06469119.018524.2645783.7634391.3607314.4581480.7673461  
2.13024418.815550.2096354 1.27424715.851710.9153567 0.6553649  
0.9656591 3.72055 44.8594710.1245 3.6124510.3005682 6.4889340.3532637  
5.1724262.15052915.504454.0118563.15626423.140881.6028723.5921261.996772  
0.7304389 1.5601338.8362470.8588078 0.9565360.3816623 1.14466  
1.65763214.0700510.679632.7395725.9908923.0095390.8454482 1.193321  
0.5331177 10.1269 4.5465190.8380046 7.2863346.8534140.5957447  
10.385121.6834410.5129967 0.9077826 4.3599140.9390446 2.106905  
14.727282.3768172.1805020.9641492.0532075.4674280.5437252 9.782986  
1.62370554.993228.8737871.3608258.6342873.6232 16.2186811.200563.096732  
11.567235.6705891.7783876.6807425.8898390.8993166 3.5669751.365523  
4.3114846.0127361.6975310.7364776 1.73832 1.4530939.3288470.8916098  
5.1810294.39362 0.8190546 1.3732264.8937290.5822428 4.93199242.6355  
2.04499619.505331.4987641.5632884.0795910.6813889 0.5201866 0.8722188  
0.8195986 2.28174219.2891 6.5497145.43468158.099172.7607562.275065  
1.1872951.43033 1.5682030.2961588 13.152380.6979639 0.2130956  
10.471682.10294529.3175432.572625.7424040.3432562 20.420443.181763  
1.1354252.1871653.7903955.83466613.4800811.895151.66416616.489864.214257  
1.1687340.1827372 3.1958820.9714932 11.7442188.032399.0797789.561322  
5.21590924.444130.2001601 0.4161524 2.3612161.7537250.8400118  
10.7003622.536151.1998590.6839826 0.8854196 1.75095 0.3860689  
3.6464825.48094122.4899 0.2263381.05512930.350430.8764715 3.71782  
1.26497323.751220.8113922 8.91714 4.8719581.04841515.577610.6812991  
0.8330775 1.31538 3.4098330.3419476 51.160870.3317667 3.657666  
2.7772612.0227788.17250123.3012 12.4266213.4667 1.6741190.7328070.4459419  
6.12708542.406561.85929816.664424.9146451.48748 1.5600710.3562438  
7.8044520.7255735.1494060.9913684 6.5984590.3792530.5343394 8.538641  
26.794585.0448560.5321621.5268493.1046661.95596110.029085.1119260.4118759  
1.3780050.9784438 2.0793241.2976431.8630424.60204 4.8862471.771618  
70.765879.1817234.96547324.5085 13.234824.0478264.2713381.0963677.661486  
5.64799815.4248820.113351.4323777.51604877.9466322.9859515.461033.702106  
0.6893191 14.8538 1.2681833.3895428.8977990.9808697 11.270951.538541  
0.7390671 1.5220144.93416931.068560.6021592 1.80951816.399415.412352  
25.349116.0692859.44457 0.8416319 5.8692871.9300330.07166438 5.409283  
12.187763.4330551.58975 19.849721.3351671.3135362.59730324.568267.432539  
1.93342210.770048.8806572.5564952.4569670.4894275 4.5444470.4469447  
6.52276 4.5045561.2942220.5822608 3.0232642.48574 4.0038785.673564  
12.404082.8542454.247981106.25850.7812839 4.4515681.1162040.7791924  
1.5942261.3999265.0385491.8459751.5472880.8469147 3.11508342.80894  
0.25562626.062056.5504231.2346392.4511990.5820062 2.30589 2.138304  
1.20605425.2056463.930890.5799972 2.16267 0.2659009 1.6368497.995088  
3.46303761.384186.1701740.8612456 1.14443415.338950.4883135 2.223052  
5.6288393.0668413.0161311.7424164.2594771.0324584.7361134.5309671.137262  
2.5731789.3365792.75152542.577047.2246122.4518731.0938730.7295859

0.3638276 20.320764.0980464.48451 9.25096321.288730.8311227 6.913807  
0.2907792 1.8873169.6560810.7071011.0897864.9011168.6643291.401559  
0.9874903 1.26569322.271343.761899  
LPCAT3 5.4650831.5137945.9018322.0696242.13776 5.4073393.3814632.433702  
2.1820632.2678524.7056134.4473786.62037 3.6567542.1223626.0788436.604561  
0.7648703 5.3587456.9816153.11332 18.499926.7492653.9842346.6462649.34353  
7.42259410.453121.86266 3.5909653.5007872.8001030.8383737.3229425.854254  
2.6671953.8088841.46278 9.2569621.88084 0.4981849 1.79829 7.822477  
5.0961218.8504286.4527420.8536508 1.5868848.83286510.165732.679139  
7.3806119.2446974.66159 1.35467 11.929274.0506683.6195332.9846691.814283  
4.29190414.526857.3272154.7819272.6428 6.23838 0.1732719 5.285226  
6.8582954.27211 6.8026642.6356655.2493754.8254121.0348752.3468726.510193  
15.756294.2548342.13106815.022425.9735133.7402216.5546294.0472924.481234  
2.5271295.2114150.9628297 3.5490693.55887810.949096.2438892.425838  
7.6640594.0501845.1601270.6408269 6.49148 0.8679582 3.4795630.9330532  
1.6457728.2280776.87856513.0053 6.2770439.8202614.0601813.1954933.465339  
5.4951633.9764066.39042910.5347411.528520.08175945 10.966585.384038  
4.0216536.8164537.47677314.647795.3107916.1850818.4768411.2053775.375131  
5.1047341.6122379.63942 3.9712437.0062061.7516035.4072945.8163942.744888  
1.8452663.8136921.6808722.1654976.4952015.80446110.919844.8970679.699532  
3.8835480.4300128 1.1989762.9489235.4453471.9118591.25783420.8021511.8968  
4.90837 6.8091652.7961744.0478146.40805211.997768.4154846.95977115.03146  
6.6007762.8206167.5334379.20986 16.5477812.2878510.108262.4467496.911102  
5.9649071.7304574.5310349.6888266.8320949.3899544.3631664.30745111.40838  
11.797965.2507832.8715835.1086612.1776073.4363992.9004851.2874921.903696  
5.36726 7.02297 5.8504751.4686419.8524681.7399324.6472717.0466832.903108  
2.2294331.7980554.1221735.6676161.34262 6.8607412.1800468.2942465.048414  
9.4736187.9568175.5847295.59933 7.8642391.9544726.4081367.3496823.289199  
3.2045123.8408632.3894925.9450612.1265982.76617612.1274311.425383.691193  
4.6371753.40255 2.07507 2.1837863.1839393.2040983.6659351.9731862.877296  
3.12172311.488323.8100036.93196914.042351.1469615.8480969.7133134.266262  
4.2251116.89034 6.9535039.3972244.35229 0.5660795 12.770448.211183  
3.7455931.18197911.101653.7051029.21758511.290473.5711145.14125 2.606508  
2.4953417.8542537.1469895.41797512.684456.08007710.009460.6788461  
3.3338673.3411646.94815913.874443.7235834.9810392.76641 11.886282.232108  
8.3451282.7912574.4761145.6181315.6675136.5943361.5113634.6173385.963502  
6.0554722.7127343.3852331.7875033.6674542.7437777.9991582.5453112.805321  
4.72972420.967971.72783 4.34477 2.3588683.5874181.8869976.6577895.672489  
0.4967870.7788928 0.7402924 11.705986.53534512.061213.32197 15.94394  
11.121282.1900616.1281384.9921471.77654 3.9692512.5018585.9177427.162148  
3.4866172.59525811.575574.9106581.4058962.8295054.8096461.2082993.117372  
7.2431010.9325872 2.3269691.57813814.398568.6173464.1309593.003978  
4.0443091.03265 6.7469722.7582863.8397352.8655096.6069225.62267911.09465  
7.78093324.529272.53738 4.5157355.4013966.8736748.8565496.8389663.951792

2.6931186.11611912.337741.2000430.4494576 5.3744256.1116017.756377  
4.3370825.1708482.3000314.1035415.5366173.1766223.7379471.1708021.264174  
3.3651135.3366515.2833151.4099713.0391235.7353568.4807623.86642 4.717885  
3.6183142.6261473.2745233.11912911.436632.7344524.95443510.011962.472041  
3.95567 4.1568180.8999374 1.1873345.5848044.6607976.7433881.880259  
4.0392210.0805995.5332363.1309875.3110692.8683795.3846254.3870821.753019  
2.88131 7.21205 8.3503 5.94286 6.6160952.1776592.7938344.5815627.285909  
5.3024250.2491721 4.3858443.9687651.0672737.1587793.88109511.11417  
10.814752.4131 3.399186  
MT1G 57.330720.1623303 0.4567757 0.5485508 1.5636090.1225404  
0.8714952 0.6194879 0.06978171 1.0977171.7261852.15268 0.08020832  
3.1980886.6673210.6372165 0.2171974.1736630.7672749 3.0993631.760223  
891.42420.6834741 10.207890.2144505 1.0730461.5266780.3488717  
90.2316611.6402 2.5419270.7280929 0.6718015 2.5211551.3314730.5371908  
1.96159610.995341.7317392.24728 6.30982314.8291 4.6172063.4378520.3458437  
0.4256783 23.246842.0997613.4539550.2900112.4862061.8070410.2466371  
0.6287532 1.7131142.4589321.94713 2.4228251.3567290.4162179 4.036808  
0.5190124 1.9314427.1045771.5364083.89412241.845150.08926788 0.2606336  
3.7982691.2140730.2093028 1.2374352.4200733.13166184.4631219.93579  
0.1013249 0.4999981 0.1880355 1.1758550.0977484 3.45136351.35365  
7.9752967.0251596.1560866.7201270.2438524 39.824861.0805274.551387  
0.2913815 2.6625050.2526466 0.6752859 1.84308 12.111633.500692  
0.1754482 14.390890.6148782 2.1240740.05746883 0.06739496 1.446491  
9.283053196.94643.3398671.77887 0.7442604 5.1929290.6080427 0.276699  
0.2295177 0.7762899 8.78863 3.0146133.38447812.280234.08545 0.2100164  
0.5191192 7.8669453.8805070.2729341 1.0254511.5480381.6839750.833502  
0.2069501 4.4502531.60555398.197122.8648742.7869544.53746812.84495  
1.8116211.9294422.23243114.393710.7945476 12.702811.5500280.4777098  
2.1667620.02882001 0.2645211 0.41562 0.2634223 1.8484460.3529066  
1.0574520.9855924 0.1243125 27.4625718.1224314.913660.6016502  
2.9508015.2545984.45693 2.0797940.9528452 1.3026793.0787162.021677  
0.4381523 6.6837572.65616336.678795.4480986.9119010.3159965 0.06812771  
5.3697324.8449240.62849117.9797 0.2091479 0.5028582 5.2983210.7706794  
3.6998460.6872149 2.8244840.2524702 0.8521115 0.15232326.8254  
1.0288152.0023951.5650276.42880611.187530.1251321 2.4728911.658731  
12.093526.8521210.3078192 1.32317 2.9190912.18655310.147931.484788  
1.5825071.50764 0.8619541 0.7130012 0.7912821 0.2415115 0.1359251  
0.8039528 18.200161.4263450.09022623 1.6280999.7444830.5639751  
10.254585.94793 21.159240.7121433 0.3603153 0.4674275 1.486188  
26.933380.4397625 6.3652390.5014704 0.4859549 1.0348240.3412452  
3.5024086.5499480.5215594 2.1978672.7364440.2979398 4.5942170.7359942  
0.3119152 2.16056712.8999610.2658618.343354.05522310.6062 10.6989  
1.3098730.7801010.5043684 1.0077930.06241892 2.7655362.6699210.2782591  
1.31680111.221888.2340260.3979911 4.7751211.1241321.0546790.1334091

18.532382.32799731.8051119.982950.8611091 1.6688370.3942415 1.318752  
6.2317296.8372880.1257491 3.9497634.21627 8.0306592.88076819.20444  
0.3125953 2.0113286.5013 1.9847661.1669494.3969961.1955015.413085  
17.868650.7389045.4586735.39317827.290162.4518180.4398120.3762625  
6.7223860.2335862 4.5583873.4017070.3006182 1.6847340.9262206  
0.1935933 6.12508189.18525234.62985.4095480.5635825 0.2110428  
10.952457.1088770.7230069 2.8495848.0650681.72578218.640532.910435  
4.16019830.087821.75725514.359672.9252851.07679519.7983211.343740.7633915  
12.520896.3965128.4875940.3456059 3.7376536.53246523.806151.552765  
4.50907411.9306 25.248041.0541632.0108332.7019420.4675967 27.48401  
4.1139611.4911410.8947016 3.7535516.18991517.405760.5871303 4.149853  
2.0821322.7484531.0038310.1940691 27.207380.5590515 2.3282510.1207711  
0.8494749 1.6424820.4766544 16.217260.9328363.03867130.020720.2068185  
2.5557748.22013 4.43957719.2751513.3416511.997758.7457360.2891195 107.819  
0.7697076 0.3351832 0.3203756 0.9715628.75073146.4295529.49737  
1.3699271.7441280.2570183 3.02143417.5362 5.5695055.7680960.9030805  
2.5709632.5861360.1150801 6.0102154.13444912.2626316.1407 12.45038  
7.7012357.5162292.63495510.4252913.530544.6149240.94305 0.1586784  
0.4906014 0.3095558 0.8735461 1.1284096.4237548.9924490.4956185  
2.6129880.1022869 3.5237635.7315370.3347346 26.837437.4134430.2721931  
1.2845582.6563921.65823 3.8086341.02914  
NCOA4 51.3526352.7031237.4286851.6564836.0331744.6176859.6569848.8421955.0628  
54.2181 46.6082256.3225759.8539143.0405260.1629153.8017656.5261318.2782  
37.8209345.4387919.4112871.4326663.345 52.6364939.9137436.0541338.36472  
31.8770749.6686935.1910440.7812536.4747720.9350557.3047742.1328438.81365  
80.2726417.0462547.8274229.1246418.5688624.7825641.0705738.6163638.46476  
33.1370816.0995 20.2317544.2063427.5951329.7290354.8349 40.2373630.34709  
24.5862432.2496515.2807855.9659418.3976619.0734833.4429155.6940654.24633  
29.4673132.6543622.9122210.7959443.935 59.9561624.5852476.8580625.54069  
20.7940457.8894724.2380712.2866 50.1900670.1374816.2212342.5257952.98077  
38.5158448.5063 55.7322186.5391376.0074333.9502338.7282614.8353711.21221  
14.4174839.2217657.1366447.8617747.6357620.0169946.4776622.5797975.79373  
10.7854 20.9779310.3605239.2337963.6538824.6308 51.9152749.1392481.45062  
18.2571926.2141453.9173753.7793957.4428236.3183833.9578261.473256.641389  
54.3257227.0059537.3306 18.2418770.2635132.8852330.5833 20.3036174.88011  
21.8715950.6888426.3261240.8584572.6151731.5010447.634 22.1414343.58702  
36.9205 20.4403 17.8918822.6016729.7341536.1293115.7275161.0492137.87949  
29.9580486.2840788.469576.22643634.0081538.0416135.8829521.8942833.98384  
58.3620635.0659735.6114642.2158825.6792533.4187 27.0255842.0222944.5918  
38.3941944.3495 36.5914227.0598340.5223661.5126934.0188443.1064338.57232  
21.6442644.2865441.6916 23.4513567.8813667.8675233.9794843.5551925.74512  
50.9394256.6646661.1249561.9790316.2564859.1305119.4644220.9476324.58081  
15.4180825.9754720.5813526.8013131.3775229.0461240.1121719.8695934.61235  
32.9726638.378 22.7041612.2591959.5550948.2511736.1622941.3196331.51854

56.1977857.2262934.2954730.9975243.3565936.24671119.151120.0959758.05765  
26.3316931.9629638.7623664.2529319.9577464.1169 47.8385228.9931534.49354  
51.6347537.4721223.2273846.1082528.8223836.7700722.4392643.9336136.28999  
24.0400242.5569447.4286931.8677836.5621 49.2467 54.1556930.0741130.9897  
41.0385224.9479536.9148738.3755143.1895340.7449739.3722724.4475 56.41464  
31.6231730.1595621.7935 47.1470229.4787341.5129744.4223741.4583377.48641  
37.7932434.9105134.5187527.9202553.8892523.0150341.4455234.9445619.36064  
20.7477228.7018833.4568756.3650932.8043632.2699422.1051186.8494221.19995  
44.0225425.6155618.7331136.9071136.6763731.8640313.9304733.2263 32.45169  
31.7745941.2902531.0336741.85557131.095619.9167433.3164 35.8388325.69631  
42.7082151.1122922.2089536.0655828.7536722.5026 27.2552351.2722219.65934  
15.1697120.8860814.24664123.984568.0701 48.4424941.6950521.6911139.03634  
32.5698759.5527253.3193526.0153320.8636242.3140956.3792545.4278553.78066  
39.0946440.7491941.8289336.6711329.9410120.0936123.6011637.8623640.62688  
15.4893519.5709813.7138345.0637848.8900535.0105249.2698230.9930733.90319  
48.6961635.5944332.2697925.2143939.4366113.1055227.2243251.2546727.02734  
37.8210696.7765929.4846645.6970325.6553148.5524230.5040520.9318635.89023  
41.0770919.5457319.4861 19.2298239.3901117.5118 45.9297334.6280849.6788  
47.1214138.5783123.6534645.3312124.9366119.6676435.5444635.2544318.06775  
32.5340231.3478 56.8636354.7246252.5519977.0629232.1518674.2992145.56184  
53.7120839.5493527.1142737.8104 45.6184747.9426742.0101824.5869120.63588  
23.6352833.5084119.6875146.2839525.3920213.481646.76108437.8336543.16448  
30.3498724.6351634.2012138.8876713.3742770.8118547.0360649.7486544.84736  
27.3985612.6833635.2495538.4846562.8870429.1775219.0565544.7503930.53038  
19.6777748.5039920.5322321.1701532.6025324.2452728.04579

PTGS2 17.150125.60908323.66669225.82469.116356115.191217.4313750.58396  
13.40937213.187710.9019989.1625 30.4263438.2145 35.48068135.00197.097488  
51.03211100.64365.928557102.39291.39832630.430221.8384435.0672025.942295  
1.42889 7.6796345.4828960.08186986 6.7824082.7775041.0189075.575376  
25.329951.3274290.3863147 0.9570743 1.42099513.638626.53371329.20068  
4.61396915.1415692.4777 0.7952686 0.2081355 1.9494392.36621147.48662  
11.7452730.4231612.698649.0057353.58235 6.5235781.0204472.60246211.92211  
10.6960532.606253.4681274.49961 16.491640.6293071.31389 3.1406077.293571  
1.02640916.7433510.196 21.867763.4122611.6846397.2000470.9869701  
39.312642.8220581.79113 0.3211841 1.3218221.6000764.1267 20.09891  
6.3692379.55976240.105131.2424640.6030938 2.7191780.2936265 75.83248  
2.90968843.4798312.858490.5698635 8.4007093.556325159.37841.040569  
1.1441157.8875721.2759980.9529966 6.1268141.93027923.704172.180712  
11.983181.5254240.2774606 0.6659206 17.3330828.917686.6919071.524881  
1.53051746.612625.8200067.155246116.352524.8078755.571480.1603527  
2.67270528.813741.02175312.454417.8633440.3007445 4.8801564.317598  
17.965387.3832867.04367813.306611.499859151.24490.7567 3.2765268.729812  
15.7621922.0944 4.66460540.868232.47626711.932040.3692068 6.032761  
62.851781.58925611.559930.168967101.56072.5762568.2237 0.7097686

22.234884.1322470.3554064 12.818783.773312119.105928.5315410.6566310.7452  
2.44227413.487762.61527627.758123.7152187.47426 43.149973.55740810.47462  
0.3636538 8.5231535.4561275.97988610.049897.9636161.0532176.083428  
15.3158122.5875623.612550.2174312 1.1949098.4937574.80255316.27693  
2.25035123.598511.2047720.1220119 15.560018.3749912.0033371.010014  
1.7887130.60706120.5232378.471458.3342738.0594335.33289254.184275.790434  
2.6075431.82923 9.9460213.515749105.80671.1705451.23470716.132661.412111  
3.47616711.944895.21017666.197941.37769816.492721.8494512.28319120.602  
17.664930.4563370.5167444 11.244644.8099642.60213715.111388.034486  
4.1912011.86857313.8154822.0378 5.16612 0.5882409 10.738657.409317  
3.67594519.6686 5.79814320.8765715.9246310.343041.8035075.8329591.256267  
11.383260.6141963 3.65117716.166151.23943435.0169711.2282 0.2772557  
1.1909053.9378741.0481467.97714915.0674510.4180262.266430.4035315  
0.5520208 29.2766915.176982.6225092.37313 50.619051.1063090.2382522  
1.5687650.3816601 4.3227 8.05446 1.45138919.6315 30.403244.752011  
1.8885841.4479364.03681939.477146.4619237.0287359.21625 1.26734120.9038  
257.768810.926549.3068220.8619699 1.36690426.5987631.914119.998935  
6.5107834.35067 26.143443.1781743.3201065.0318975.3229887.00952614.43795  
2.7042192.83557715.549016.0981712.547761103.20085.6259795.1748691.549106  
4.02795719.341273.87914 5.3421912.6364394.2960037.97356445.929099.638522  
6.05156910.4710211.509880.65386518.3435 51.602270.3997031 3.274909  
7.7350770.2331616 35.6257516.966212.55819 13.849096.77804943.99074  
12.186542.3827993.5030662.7350479.8862255.93104 8.9378234.8307765.806805  
174.880915.830722.9068697.35342129.0738138.2516 1.8591690.7774013  
0.2906192 8.5953974.0085470.1042215 2.0279 18.22925120.72763.819626  
102.26610.3154174 1.63364176.232260.1614190.1683837 0.4882162.266613  
41.394150.7356251.99590841.6197618.864796.94918230.567937.8160422.166672  
10.7765 12.0095940.864047.0851970.1560763 1.58408713.481071.537588  
0.7437321 1.4170160.5568931 19.2145927.7066522.9757434.385835.498423  
9.6591725.5774164.85765 6.14475238.061093.35973716.172420.9654639  
0.3478337 2.09499518.9519 54.3845692.5665 10.3801814.8677310.4391  
19.7574821.482860.5651129 0.9509454 30.870790.3939185 7.484872  
0.7629689 26.534827.93466733.107137.0795628.630435  
RPL8 696.8171356.9255690.0825400.6832662.1621826.222 626.4418648.59  
342.8766426.7062832.1414560.2809542.90381450.326355.1333670.38331245.225  
1356.5941341.2741722.613774.1522599.9259455.5511681.68511219.7121160.094  
478.4628300.9628946.7741877.5299782.0549461.09341550.503673.2604429.8995  
632.8725408.3231576.0853348.0299880.56873128.0591177.765578.351 715.2283  
548.6939400.27481041.6951440.205737.3155700.78161737.302925.3112617.1721  
617.59571574.8151092.5931215.901516.0718588.60051563.553641.4549562.0431  
879.0453605.29122105.261604.52991788.0451376.137940.1541827.15341134.714  
2390.114793.6048469.52091419.551554.3275689.5901573.2552435.95441990.01  
552.07621549.758578.03311223.0142362.929648.9438824.9994577.55011335.848  
1370.3461363.679639.66412050.223720.0232691.5893875.83191222.9 1493.193

1153.074756.95061147.76 296.36331211.816683.028 1670.0461137.773694.0064  
137.1261430.2549441.9996768.1079530.487 941.7339486.7956787.2064752.6057  
3299.566973.139 415.94212844.2131092.232447.13771773.047501.1082892.3658  
833.83531645.823848.0283631.26962250.73 881.0075841.9925577.83 1141.207  
709.5204583.64531074.785652.3944609.6111907.15161301.871810.42011032.884  
552.7728713.1403887.4085116.8404481.437 1874.783744.2899943.7335801.1362  
1216.91 1254.5911203.91 1135.471805.7584719.23261063.0831282.432572.3965  
715.84471218.21 1057.916732.9809588.9836749.5708944.5181808.4712624.4961  
831.21712192.247431.0324820.51121252.1671430.126239.0546552.0014642.1  
468.3064357.3962519.1621441.7574474.4633851.3766381.72421867.9821533.962  
482.1988955.54181147.296329.8381752.6278666.6985737.851 1084.212655.9524  
935.792 1091.4641896.478840.03241743.909604.3535804.7531543.6532569.1211  
704.8532691.0182742.5109891.3707828.5391692.65331452.158683.6824675.7831  
807.2819624.40381272.769768.6958371.5468618.8214704.7096739.70321578.554  
1280.944685.04131715.439552.6149884.62331038.3231279.5881207.856411.7336  
502.89661233.8611149.769623.44341131.224562.48971156.252873.5557778.8251  
618.1545718.19781140.777518.2172732.6596787.4629636.6875580.93 1658.625  
586.84181634.9571036.2741564.4162319.004891.8914506.2248644.81141192.057  
810.11381784.4811519.1852003.3921174.479515.813 420.56081423.457845.159  
1203.5581016.6551161.69 898.5215851.1226594.54151066.2561424.885859.3886  
541.6703773.5203624.422 643.9252792.8273843.87951583.6581110.602567.8358  
953.23221176.833489.2289560.4045761.3479722.74951075.7071006.446457.0188  
590.84531083.462575.31031285.0261382.057650.5098603.9895646.5526700.5318  
345.69712488.0971042.0171053.787414.41011508.598665.78481162.91 669.6882  
562.2384747.338 920.65231133.5621131.2971195.421739.0606555.68491116.344  
656.5976874.065 759.04 953.58031369.023407.90571058.2281299.21 737.1396  
736.82121420.5822131.8241044.412335.4096818.636 677.61121382.333930.3107  
755.7497779.6877752.2859643.3082930.6432778.7109529.1397569.98311309.567  
834.157 1595.584248.4964420.7757970.1246999.5286910.2442368.95981059.98  
1029.585672.18311150.3651236.378597.3392983.3159643.1572463.093 579.6392  
1318.4931156.821660.8489443.6319997.13811072.0031933.452766.2886710.4055  
799.41411683.313870.2827542.13041084.1661445.2291009.1281567.42 1313.95  
479.5427676.9301779.636 668.68511204.805552.7004566.01071037.694931.3674  
2245.7311167.304617.04381023.436725.248 1887.043306.19972352.128915.6064  
380.7124652.2981987.0378713.20871256.2441467.716284.9533862.6413331.6967  
513.5672708.57831299.6581415.289866.3147788.7642477.32391018.372761.7048  
1221.1951068.4971328.633590.9135568.21051034.3681002.5311061.541

SAT1 95.5427510.49087118.532255.0974887.3317879.8928739.85922146.0806  
17.5257475.3962785.3230665.0360658.9642 165.000527.70967156.364286.06023  
212.8905101.282415.3369 183.7383125.594 85.4342658.1541648.8453343.3781  
91.75562206.2374137.5161160.3194178.825683.9372157.06771105.6143117.0202  
24.9929260.42789113.9878105.516886.7940176.70119365.7573101.084686.89943  
162.503639.3002628.6700835.7841228.41788100.482257.0709392.8759177.37206  
93.4288789.8328133.3949547.1317 298.1115133.94 83.3326571.21142128.29

72.65136369.043328.4494466.10153117.492 39.6733739.83061119.821475.03511  
116.570355.41592211.361944.10929221.559 46.6112734.8735294.8338469.54225  
36.9423647.8959392.2251654.9939183.5659 89.6171872.98775167.5843201.4857  
12.0530961.63197113.426776.37391109.831 282.744 62.7070551.45133101.0442  
56.8308275.1870885.54302300.007998.39456150.803965.1961277.87058156.8438  
88.33474195.6899206.1842106.173963.6291972.6949437.4258177.4438587.4305  
47.0906431.81043130.994556.4093797.7669138.4367458.5576893.3965818.78094  
84.26757137.39 50.8647 106.286458.7274670.4193569.55929190.1325258.0463  
64.2454 51.7962 81.9366 252.052247.7046 36.1992667.50442207.058149.76714  
268.9182143.9101159.2047162.230643.1002291.61522266.542522.99693135.1997  
37.5953844.4485334.7161475.0484565.34604132.0476623.047235.5950365.75616  
91.06835292.656983.9909553.9776266.7907 78.36239133.3493269.1795129.9057  
188.4705293.7485138.0482147.079289.7516121.28309120.823667.7734 150.3453  
158.203876.8135 76.7185138.83436146.2378164.611674.79828111.809361.31409  
59.8519 113.1218160.066139.90881118.518746.1924961.83407108.3563163.3379  
147.392343.69415269.6772106.884824.33411135.5932120.1469158.4735173.407  
52.2803991.9986256.6933858.5892364.64368143.766656.3504860.28684155.5497  
116.7299412.746271.1281 124.0068206.6296173.8087195.2674296.912652.37314  
99.3929844.8702158.81437136.738984.1554927.72722250.448 33.6436776.83486  
77.8999 80.8374 135.0176122.049257.63831468.286 91.9175141.20612405.2799  
305.874945.16247104.0238166.268190.37878148.374437.48567136.193794.05268  
15.1100945.2772125.20255134.345419.26541179.022740.8681852.8732769.06203  
48.6024372.3926680.9191272.5982668.6695 127.031368.75402220.972776.76308  
288.2758229.792273.9495 90.5291445.08097323.248972.1978864.4427220.75577  
54.4915 114.272897.0073580.38011239.689 61.8704332.4499538.82385102.9429  
135.0529171.354279.69224244.934 314.242668.16727186.6312143.829369.31069  
49.56025109.7494234.0494131.765570.71214494.3296133.778691.27512228.3712  
191.823264.59568300.2891195.2908132.527226.07685192.443477.0078 213.2817  
54.9488290.6562593.94597134.1137510.712 489.195676.55087100.0154134.2052  
20.97204252.2887256.287 75.06709224.051498.8948844.2974650.83297116.0575  
199.257869.97636315.6232167.541 195.279333.74789293.527651.79662189.8328  
40.57557198.9532236.5138168.6848233.2703138.3252272.987827.5258834.77924  
247.3462222.636471.90626157.509254.9428570.1817178.14737167.3937179.8102  
64.1315133.2202767.4297 84.7759152.0469852.6170746.3523 133.193455.58512  
423.3968107.3271229.0166113.768136.2574178.4089271.91933251.796168.32158  
239.0075176.0309342.0382307.7768122.553 65.1953991.8028247.90862373.2904  
123.0897127.830697.61653215.9251163.363561.68155160.240143.4277670.89872  
43.4520138.78424102.144560.76172143.704 45.0932573.70888126.702 87.23082  
37.16782210.2079299.6344106.3489133.631919.5140194.41818392.154681.02507  
426.080784.8541389.99649345.669 117.126558.87227178.0432143.695471.20937  
147.3183168.424231.1743 171.4862100.857349.9002978.7000592.94002  
SLC7A11 0.2655803 0.1861875 1.8647530.2723395 0.7360069 2.858641  
0.3011907 0.3107074 0.1030990.3694444 13.148611.2083720.6907521  
3.6532470.2507741 13.058970.1954338 0.8025139 1.2938490.6486389



|            |            |           |            |            |            |
|------------|------------|-----------|------------|------------|------------|
| 0.1433937  | 0.4790986  | 1.4317561 | 2.168930   | 0.1549611  | 0.4960019  |
| 0.7212974  | 0.3737643  | 0.4089144 | 1.1954630  | 0.4935744  | 1.356155   |
| 0.7661664  | 0.1604053  | 0.5056630 | 0.4521058  | 0.5386436  | 0.9531797  |
| 0.8872466  | 0.0443507  | 0.3846817 | 0.3424463  | 3.7142191  | 4.129972   |
| 0.6847949  | 2.34184    | 0.4998894 | 0.4425077  | 0.9510880  | 0.6822111  |
| 2.3929831  | 4.096491   | 3.833350  | 0.9230019  | 0.4731011  | 0.09709592 |
| 3.18385    | 1.4743640  | 0.1301458 | 1.1727740  | 0.6757125  | 0.04887281 |
| 0.09007555 | 0.4453403  | 2.3460120 | 0.2332821  | 0.8150703  | 74.725340  |
| 0.4545987  | 0.3016262  | 7.445440  | 0.1209603  | 0.2339477  | 0.5251655  |
| 19.018360  | 0.5384351  | 1.3357361 | 5.208431   | 4.691150   | 0.3702273  |
| 0.4507631  | 0.2329709  | 0.1085126 | 0.4845319  | 0.4361594  | 0.5588174  |
| 7.55402    | 0.8934557  | 0.4039989 | 0.09287355 | 0.1614415  | 0.7402413  |
| 1.2087180  | 0.5402989  | 1.2691410 | 0.3441370  | 0.1888054  | 0.3550106  |
| 0.5915610  | 0.03036421 | 1.1767720 | 0.1073175  | 0.4097748  | 6.0291610  |
| 0.1569482  | 0.5181887  | 0.9461955 | 0.07353522 | 0.1469103  | 1.700346   |
| 2.8789180  | 0.5366432  | 6.6327530 | 0.3587628  | 1.2403950  | 0.2090469  |
| 0.1533035  | 3.1849070  | 0.3290032 | 5.549450   | 0.2475811  | 0.9846340  |
| 0.06664676 | 1.8292523  | 0.0645560 | 0.3244929  | 0.02732513 | 0.2149206  |
| 0.9078671  | 0.7625902  | 0.7181745 | 259.61620  | 0.06723175 | 0.6467899  |
| 0.7368690  | 0.7689321  | 0.1159162 | 0.0224527  | 1.7898290  | 0.4459063  |
| 1.0307313  | 4.1142314  | 2.2483    | 0.2175485  | 0.3022638  | 0.4583656  |
| 0.3024483  | 0.9552797  | 0.2571385 | 0.4357663  | 0.2248054  | 0.1476407  |
| 0.7451584  | 25.506554  | 9.842761  | 8.235990   | 0.9561359  | 1.0258833  |
| 2.1584710  | 0.4826087  | 0.4640703 | 1.1912971  | 0.0278370  | 0.3905214  |
| 0.6865163  | 0.5086522  | 0.2487683 | 0.4196384  | 0.1159561  | 0.2191271  |
| 1.4485120  | 0.5066743  | 16.3002   | 0.26078    | 0.1627149  | 0.2148666  |
| 0.9614662  | 46.762     | 1.0429520 | 0.3006809  | 1.8119690  | 0.7954814  |
| 1.1849910  | 0.0923663  | 1.537     | 1.8083070  | 0.3879383  | 1.9435973  |
| 0.3646514  | 0.06251577 | 19.756940 | 0.3128749  | 0.5355574  | 3.3097323  |
| 0.1146977  | 0.1833596  | 0.6411085 | 0.4495262  | 0.1081162  | 0.6767496  |
| 0.2362581  | 0.3780682  | 7.49558   | 0.6124219  | 0.2726644  | 0.3669036  |
| 0.1714998  | 0.4096574  | 0.3752863 | 0.2245320  | 0.3915866  | 0.5646743  |
| 1.60113150 | 0.643360   | 0.3723420 | 0.1872954  | 0.1817935  | 0.4487117  |
| 0.1908898  | 0.2188828  | 0.34356   | 0.3850879  | 4.9796980  | 0.1624688  |
| 0.08151328 | 0.1736883  | 0.5746873 | 0.05581785 | 0.4952057  | 0.1464423  |
| 0.1298254  | 143.15830  | 0.4923406 | 0.1719614  | 0.2359784  | 0.5083787  |
| 0.06142538 | 1.0273910  | 0.1867313 | 0.6673987  | 2.5388920  | 0.2369973  |
| 3.9822761  | 4.095660   | 0.2058359 | 0.2622833  | 0.7621028  | 1.0555231  |
| 0.2875312  | 2.0892671  | 3.3920951 | 4.909113   | 0.08002823 | 8.18720    |
| 0.2315046  | 25.735471  | 2.2594190 | 0.3274823  | 0.3599707  | 0.2166866  |
| 0.9550555  | 1.9906750  | 0.8132120 | 0.5020571  | 0.7652250  | 0.1380994  |
| 0.2708054  | 0.9711860  | 0.2184281 | 1.24319    | 1.7075920  | 0.5266709  |
| 0.1894333  | 0.1957934  | 1.1593980 | 0.6042659  | 1.62341    | 1.0202040  |
| 6.79118    | 0.4825668  | 0.5539627 | 1.4809663  | 4.180931   | 1.1298531  |
|            |            |           |            |            | 6.959070   |
|            |            |           |            |            | 0.9580549  |

1.0500641.2810470.2183481 1.1790080.7568094 0.6380935 0.3341269  
0.2146154 48.497840.6555892 4.8416630.4131952 0.7039989 0.1172233  
0.07076369 6.4262541.51976332.722481.6825080.1662865 0.7409219  
14.674350.4678391 0.5728916 1.0688550.4509239 113.04950.7770526  
0.4518240.9164189 0.5437160.0484042 0.1962517 66.512890.5916006  
0.07114286 0.5044516 0.2140166 1.2951750.6761677 0.4223554  
0.09848307 0.07412977 0.1880532 0.4813871 0.5629228 0.7078395  
0.4617919 2.54235 0.3533138 0.7598675 2.2807340.1627378 0.7375685  
0.3511851 0.08149753 0.8151172 0.6658629 0.6290114 0.2184641  
0.3210839 0.9718509 0.5831865 16.5819 0.3383774 0.7625098  
0.3664076 0.2766326 0.7051216 0.6208299 60.5270913.924412.075907  
0.4640751 0.4988891 0.1384019 0.6101878 0.4805402 0.1489112  
1.7887260.4540745 0.3581684 13.8314 4.8741640.2267949 1.478284  
1.9038120.2443104 97.891380.4693887 0.2354816 2.5356230.5354642  
0.2002147 0.2229044 0.1335768 0.3817861 0.03653461 0.4428484  
1.5830441.95177 0.4088936 0.09931679 0.6303273.0274790.5270902  
0.2463863 0.1379179

FDFT1 32.983 14.5456 24.4621310.8836517.4335530.2685117.2231 21.96252  
11.6604710.8929929.7349526.6573 25.4582822.0015214.6853820.0186742.30134  
44.8076838.5597 40.1808 23.4384642.7170862.0026261.1029829.0131243.77096  
40.6327635.3333538.1385916.1347 14.6341826.8521 45.6698441.6662543.4178  
6.33848 20.6647831.4314142.5694213.6670111.7132439.8406236.5448721.15334  
34.2940645.6264712.3131 51.7494 38.7983719.3800621.7937319.3998947.66428  
28.3056820.2530848.8328849.7782 19.491 33.0758931.4905321.1993732.71265  
19.8360822.3229538.6063921.2929911.303 32.1144331.3141121.8661652.89252  
52.4564729.0734418.2248216.1698 58.9322346.4952143.0952147.7258527.95048  
40.4696835.7184712.6209835.6684213.0518 28.532797.49553311.4763630.20028  
36.2007860.4128326.7524426.4566234.0618474.3199632.3442431.0843718.6118  
28.8458620.2699717.5495734.0558830.3436291.9534437.4837540.0300913.26476  
30.8197978.0263861.8966573.1506553.0053823.8506665.9861538.0158 38.63542  
35.3210916.3896134.9356521.17312120.9769158.156855.6972746.2160524.51627  
33.4871534.8354 86.3322322.2239633.9048325.185826.55342723.8425524.3194  
19.4130719.3761740.916 10.8818593.7162239.9799846.9858133.8814242.0741  
79.5212 15.43702136.427910.3675612.0706634.0143342.4308765.6890527.93094  
114.134 114.913 48.3456541.477835.83437117.1617625.4082670.9211668.3024  
53.0988319.6073561.22105103.959938.5934135.8640951.8885383.2885214.29969  
27.8305730.3260711.9794 11.2345163.8792728.3669 30.4806816.7181367.14131  
7.86783346.9158 66.3579736.5253927.4320829.4856125.1478344.7901435.59917  
9.93747828.7307617.1533941.1664639.3536128.5455510.9153215.3766119.35073  
16.1538826.684955.70073916.4049917.8363 41.0636458.1458920.250479.687371  
39.5065919.8095213.6552523.1485828.6347242.8260738.2127833.0406250.95166  
31.6169868.6174921.684999.9123838.18450927.6270817.0378320.3603229.04177  
17.5865 76.2724916.6007754.9116911.6892645.1543912.1041224.5753123.12069  
28.5981733.6803223.4055110.0566253.1346518.4456470.2983824.837528.032073

39.4269234.512039.28271241.2568818.5487924.6408217.5560619.0796429.69217  
49.8070418.0727312.5905133.5438528.6131743.3656 18.5216429.3012646.03403  
37.5016237.5612245.9653721.7024964.2330948.4873672.6479541.8477222.61792  
22.2117466.2396 27.0889961.7497863.3521254.4361232.4086 22.3295877.94504  
29.6603 77.2444535.2014824.0940879.9130539.9858 33.2414840.4674317.39729  
38.729236.27553230.7587212.3888521.6990428.4398729.4635336.2223313.4005  
46.5754747.4703494.4062915.9607181.1593833.6885 36.5751 16.9347912.29562  
92.9342133.5820312.0521131.0381647.4248331.4073957.1927 34.9760237.28889  
32.3666943.3072724.6106210.670539.90503633.3406912.4085530.7588720.0809  
74.4255510.0492148.5759583.027417.83841312.2059811.6792935.3131235.37148  
29.8169141.3197311.8732628.1045419.8010921.4749814.5049 31.4701117.11784  
59.2261138.5226815.2766 56.7417117.9895211.4160438.2340198.3144 40.17197  
59.4989521.3872229.0964113.4020610.9524658.7925325.4682641.7341313.95757  
41.3299436.9760317.2694333.4611936.69342163.397511.2855717.6062218.28107  
17.8808 16.4638621.3022910.3112268.4952526.144697.76119810.6322522.64487  
67.8301217.1739115.5362 57.5455817.5132136.5846673.9026 33.4379662.94194  
13.3609520.7594428.4752415.3941228.2163398.7038916.3186 25.3087756.38486  
14.8282415.8284910.0338329.8590213.4706448.6401432.6796424.2564 25.34665  
25.3855321.5677412.6409930.91929160.009333.7077211.3879547.4122652.6417  
19.7937912.4293168.6640633.6422325.67334118.088529.3850249.5965644.5488  
26.2314131.7978616.1230572.0817425.9056551.0531812.2834824.11909

TFRC 15.846534.09067414.9138414.3128516.1852513.333677.5813684.910072  
7.65767416.2988 9.33148513.3794112.3676121.810264.81025825.277186.399775  
20.0536112.8080716.0335928.3598443.7008126.3874638.2783353.5947856.21155  
89.1424329.6938765.7905511.1133224.8900517.592052.46723536.5524118.22292  
7.25994322.4045812.9005219.267168.1465428.95990252.7177818.4631313.6062  
20.6496254.305256.45980752.4246 330.558527.7711226.0588833.9410547.66088  
10.812058.74358224.1986841.3100559.9121525.7970919.4822441.8566443.48684  
107.90439.10756634.7394623.860647.08390112.5888413.047655.71977413.20172  
25.7614727.6736135.4467 33.3291829.208858.964106160.437535.638683.386641  
14.214946.07441827.2824652.9359943.4036110.8508314.3689514.8605911.57406  
61.2052590.5794522.363 31.7879224.7902938.0288645.9963519.8869120.00429  
18.0545 20.6324611.868498.58818 11.8828829.3710815.964339.69737512.8568  
100.597 28.5107836.3855710.5992615.1035318.71849209.798433.6259335.95619  
24.1047949.0517 43.9691312.4636633.2872641.0178455.4714 54.2447720.89241  
17.7670766.6200819.2443623.485114.84409910.3252 24.3133539.5071510.35339  
18.8893 18.4794415.006 21.3188646.8582248.4293319.4558948.2098111.31902  
69.287539.01390246.9468652.3438311.247378.60831 18.1487915.222498.544913  
6.190113314.128364.9799518.0451716.0478823.112287.83251118.0620916.03473  
35.6307838.6023214.0676631.8749823.349037.11188420.9030912.7106926.06643  
55.9962 18.8473317.0539 23.990539.00346625.6094420.274949.63183215.58191  
18.0689721.4423322.0921 28.5370734.8984 33.0210822.8916733.2091324.00519  
7.85315713.4745612.7636623.1995585.3133822.144329.32586614.624848.600748  
13.8973898.4939767.3300733.463618.71705655.0209987.572258.11459633.73273

10.3282910.6844888.8223 21.2316791.62816180.866138.0490921.9088115.37861  
192.348118.537567.19281613.0182425.5233112.5700984.9702 17.4218417.10819  
8.15542 45.1646127.27697176.565114.8739241.9058622.7738 9.61531711.06931  
31.095895.91055219.6121214.1849390.02192107.916685.2343915.5725114.72239  
36.7375424.9560431.6729714.2992726.2160618.675568.82314910.6378113.91122  
37.433559.95665512.199486.19727953.008 38.7768214.2587217.2655171.71065  
133.307419.176784.52735725.4742836.2208417.5475920.4154321.9758910.80871  
10.8122931.1262516.5363542.3569831.4431332.6991982.7487620.6782622.83358  
34.8877799.3509517.6034459.1287364.2226591.9514616.305779.41461115.78909  
27.4769836.4730841.3396230.941117.19832239.386096.11003523.2416343.7342  
36.1501 17.9107537.123899.92895 80.7624694.1660589.0989 24.1713918.34091  
165.102712.9234 5.89072316.8393898.5808 38.5604338.235019.72664533.55706  
43.223776.87243913.3870917.9998311.4394415.0466316.021688.39226812.1429  
22.8972911.4986542.4079325.6856113.2184312.953898.72795225.0436231.40283  
19.411469.02548611.3933611.8060851.1259562.0133816.6315142.2798724.81955  
13.426938.49589816.0056224.9153726.9229629.7020217.3969667.2861564.93419  
34.1128218.2384783.8851915.2916327.6975356.8671810.6811932.9679118.95863  
23.0395934.323938.75349 5.90667977.30032101.093465.4332113.6656236.28534  
24.7566114.9497519.3069 6.59974 13.8238914.951338.84773321.4860346.52751  
106.364713.6284 13.0651222.8470236.0852618.7318630.3030721.7261274.67004  
10.1879419.7477721.1167513.680048.89372432.6226317.8813210.7673222.20514  
8.8784845.79175860.403179.79685356.0590415.1666 37.2328 3.27941227.0726  
22.0849534.4632413.4813620.0101532.7771736.3952427.9917142.4476522.89177  
23.6041212.9043223.165 11.251329.1223426.55828439.9288418.2810718.39541  
13.476337.50463 19.2316 6.82159921.24966101.51137.94350611.26688

TP53 20.392789.84405815.518896.73788611.9415914.3543714.4474212.00494  
8.6163396.02993817.6116625.5792322.7190715.768697.3741339.90186833.68871  
13.2740525.1636823.036264.51204115.9926435.9567413.2594540.5210517.78868  
43.9348622.4927249.3129725.6978 16.7104614.1036352.9126726.9719 24.43232  
15.9847 18.320334.85350812.6460319.2827213.8299 12.2165640.048996.853962  
25.0420425.9610631.1209413.203536.51219 18.2546323.1607926.5675713.36041  
25.179688.9679721.66982 30.260886.69998 30.7642410.1638610.5294517.36195  
14.8624316.2257 40.4427917.533669.48631 10.4100525.6483922.425114.054236  
27.9841529.7883625.9376563.6272216.9039230.0117829.7461633.1553637.62859  
20.8660922.0157429.3791536.2439 1.57813223.160186.90582810.9575919.19036  
42.2930539.5642332.2563921.166846.06436924.4986718.9519870.4635 17.11975  
24.1865513.8740512.554416.94549916.0592526.6866523.5822441.4326526.76924  
9.60247223.0268414.6001524.2238518.9120523.3191215.3089825.0306111.96977  
14.1518228.4708824.6867 9.54636143.4266723.2563920.0802637.9159738.25591  
21.8892729.5526817.723189.40724732.0895914.4504 21.3305426.9068221.34701  
3.10665719.799676.76316410.8481338.9116539.4329 4.08056419.0689738.54213  
3.1004237.58837711.1659818.4244913.1798842.1210822.784662.19698817.97453  
25.449522.47168626.1473623.8415618.4824721.7648529.1011321.0084626.24835  
25.0635227.394463.99390427.8505419.266 4.3108562.65036917.1153214.34186

13.54417 13.98876 10.51799 4.19377 822.46688 18.30413 2.63525 11.09873 8.05373 8  
43.37684 15.14409 3.86698 218.31614 8.81112 16.63187 412.90565 20.03429 33.33876  
10.40513 26.65217 17.85699 27.03385 19.85126 4.45495 335.18395 16.50195 25.66066  
24.88668 2.21248 59.87669 826.28121 7.57230 625.24672 59.68582 14.61547 17.72536  
22.65519 17.44821 29.12143 28.32965 45.14376 16.214 35.98455 2.11088 11.29591  
16.6654 30.76076 25.95494 3.45687 431.71772 11.68886 7.17858 922.33077 31.93411  
22.44187 22.06023 21.34657 24.04698 11.80586 19.79876 19.07001 16.60044 4.67976  
22.45214 17.60289 35.28451 26.615 43.38429 37.42206 1.37273 439.9797 9.27267 8  
5.24260 619.50213 29.87247 6.35613 313.78769 19.91946 29.94726 11.104 17.29088  
5.18237 319.47744 15.18487 22.96402 13.98717 21.58158 22.54854 22.0041 56.05191  
20.86995 4.97592 42.92359 16.10939 35.03649 19.60349 5.77055 434.57425 5.61150 1  
8.20546 18.03945 36.97344 5.13543 421.18447 17.17931 31.10974 4.87286 512.19632  
20.40621 5.70991 512.24186 12.49723 12.7121 18.015 7.35234 848.1577 20.20978  
22.57775 26.00927 6.21793 742.56873 13.47707 14.85953 46.51391 30.19596 30.42252  
33.7234 20.04002 15.29713 20.26004 25.94098 23.71817 6.03014 124.70956 24.98453  
11.4498 29.32673 18.63424 18.92418 9.53127 952.16088 13.98404 32.51968 35.84711  
5.98784 814.53453 32.9294 4.65357 6.07397 113.66378 14.82601 4.63436 72.44098 2  
40.80478 32.38761 13.73897 82.7041 44.16857 37.2093 5.18073 231.211 25.72253  
15.91163 13.60724 31.41616 17.11194 8.42740 611.81319 21.42747 14.93301 6.24216 8  
17.60764 38.48713 13.10348 11.8206 19.97245 18.25589 11.86422 16.77009 25.32214  
35.64201 12.29923 18.59192 5.12010 331.01045 23.26207 13.65127 14.56997 12.12158  
18.1423 30.39312 30.35385 18.49692 7.15312 932.75788 9.36541 326.77573 7.07164 8  
1.41594 340.276 10.91308 16.60845 3.46658 116.77316 29.16093 49.67901 38.85743  
20.50776 1.22568 36.45334 149.20448 31.28434 31.95475 65.85378 16.61298 20.16361  
12.47608 22.9611 29.99961 29.23226 12.30929 31.8797 30.44517 16.91309 17.08932  
17.72131 27.86547 25.15594 19.69535 18.94774 25.42315 10.08135 26.74488 30.53117  
23.6028 8.23343 69.37329 23.62482 28.82755 17.041 35.61721 13.89763 29.18848  
23.8779 16.12114 22.4366 36.1448 22.20734 43.65902 26.52223 13.48824 32.54106  
8.67635 919.34964 35.39261 14.15452 29.05274 27.12385 5.46432 432.11473

EMC2 8.88937 56.82637 310.30645 8.71322 26.87309 97.68105 88.05446 8.79833 3  
6.12504 88.48858 88.77602 89.24735 18.30111 69.56051 38.20831 95.87752 68.19812 5  
5.19312 6.16179 714.49312 7.17437 18.78581 913.89018 8.64500 29.23084 411.59524  
7.61228 69.33823 79.99468 26.16083 110.8555 8.05477 6.58941 311.87343 5.91609 2  
6.59802 79.23186 27.54733 8.96152 210.46886 10.51878 10.66038 8.26152 110.6855  
6.80680 710.78691 5.28966 214.62134 11.25852 6.35669 513.60038 8.08160 96.66750 5  
9.07854 95.35669 10.79286 7.87096 411.70383 17.44661 11.08224 8.42290 18.48777 2  
15.55472 11.1996 13.91955 6.00785 94.74403 110.59776 8.01339 77.72849 611.72812  
13.43778 11.8253 8.63425 511.70103 9.00070 612.37039 6.86039 95.04714 79.13073 5  
12.51737 9.84011 89.95178 417.51962 12.92966 7.97832 110.13264 8.95229 17.07420 1  
6.08528 38.69512 27.98053 718.9668 6.51718 711.11997 8.43884 114.18815 14.2113  
14.00233 3.07417 211.28546 4.83478 66.38424 99.23931 97.69133 211.70249 10.91896  
14.28941 10.22138 5.64571 49.89132 15.57258 99.64891 910.1108 7.99002 11.49344  
2.17754 715.59095 10.0455 17.32574 10.40616 8.08777 710.83029 9.94392 77.43134 3  
7.20052 29.24134 88.30366 8.66858 35.60596 46.83265 48.12923 411.15752 9.34075 6

7.0569679.0703568.83052112.334735.58470910.1555513.702998.6081378.855992  
9.54101118.743487.2490359.6794391.1547824.8622627.09829710.6072611.9223  
5.91204 13.9837611.392456.99072911.382068.7189888.6264287.5604098.233899  
7.89745218.852369.9547416.56122913.7216910.0318615.623756.7849298.25292  
10.1434713.1379 10.1308727.9044 7.30235212.2165 7.1342724.6406036.377527  
7.5091229.8323298.4215029.87718310.2306710.041819.51940815.6645615.31197  
6.4229514.60020610.420746.25833311.763528.22980610.8968711.490174.47775  
11.203318.63694212.423798.6119527.52248 8.0149577.35957512.315518.536382  
5.67692914.501246.9356376.33134510.265549.9388619.27585412.1599212.18704  
15.0971511.241197.65407613.2409517.3719 6.9015336.82565713.1709 9.073419  
10.5273 7.88393611.6826 9.3746579.5122776.13791713.104566.2712448.252819  
12.110815.9083237.7534937.48502515.8049910.6984614.6334911.790336.865791  
12.6712411.3689 9.0799818.53582810.7126714.667829.83808211.041214.844702  
18.693847.4275697.3891585.99162620.6460415.188918.4784278.61740418.61853  
13.5901614.032418.73829216.178588.5095147.0027078.5012587.66114111.95438  
6.6696545.8079858.36968 10.7375812.1548 11.047066.01557426.041259.397508  
7.06239713.304649.7025957.0984278.12819 9.2320758.0802367.1587999.061221  
12.9626721.534916.9309496.9939849.60186814.718937.25239412.3165 6.329983  
10.2983210.1199811.4311712.7351 10.294627.98102510.760434.7433518.590839  
7.6246014.3905386.0610556.69719311.321278.05631 11.7868 9.53069410.40858  
7.42747 8.30019 11.040499.9264 11.296779.37691310.0392712.0432413.25553  
7.1195328.43940716.3617 10.7207411.332047.31541311.025018.1642747.643922  
10.479999.12631210.2478211.597957.32878712.862147.50623421.7299811.79851  
8.4418289.7508219.3109559.62771711.8829110.944627.1710958.08046415.74414  
13.5014612.4557717.755368.3688529.42418911.1630310.631979.13995225.93851  
7.41281 6.9914314.9876763.4159969.0243548.1312377.3155346.84638910.6102  
6.9203798.90232915.942268.0288958.8925055.1071014.69327413.425746.275638  
8.02180416.3980612.376577.44211210.705696.93789311.5973214.3089212.78777  
10.669765.98136112.235736.73282211.936859.80686 9.57974711.3537610.66207  
4.8076045.2559887.37825914.552778.4500618.2158188.6181471.8717528.289354  
9.3299078.2305987.36587110.923539.8208395.7096531.849 8.20760912.52214  
11.2547 9.7352127.9963587.15278911.676447.0049996.9012084.3883238.426513  
8.6299089.06258212.978928.3382829.01399615.6730811.110029.468643  
AIFM2 2.4624625.7139631.8313284.8318164.2569152.7831114.3890625.288569  
3.8780834.45413 5.3328984.2052723.6199184.5222036.3456133.2248614.776581  
4.3724264.4794176.20901 6.5129977.6140227.2328342.1061335.7984646.42947  
6.25569 7.8470675.9503649.7007263.2867872.12989214.325662.7484463.850511  
2.0587962.8297165.9269586.75476510.155234.1256691.3101343.45444 6.672808  
2.76697420.112998.8648365.99177610.366761.8496321.1055184.5699 8.413931  
2.03181617.1645 1.8606668.5575834.2821155.9230972.7169045.1562365.689595  
9.88759 3.8313957.0251662.1591884.43525 3.31821 5.9046495.2442324.654735  
0.7642509 13.7713313.610915.8044254.4827993.86916 3.7639183.103688  
6.1354124.4740794.0831613.9869241.4912911.06964 3.9319 4.3547512.328842  
4.7547652.0974135.7998095.02332514.705484.38393 2.32884216.668457.268232

5.15228 2.1775316.56009 4.07036 2.8845994.7849782.6272263.5009945.659  
3.9183115.4083726.0317997.9972496.9674125.6747911.56895119.0002 8.626468  
1.19278 18.107273.9547283.9327918.7857214.1498224.0095631.87321811.41888  
6.1744322.1482156.4807493.7024034.1092575.9283756.2938072.13429 2.448353  
10.717752.92523 5.4776223.1958155.7082523.8778945.92451 4.0274575.541459  
3.0504264.1400925.3419734.0816987.6743872.4119573.8935514.1703641.923726  
10.111093.6455873.3103291.8517482.32859 12.377286.23089518.016185.566875  
3.48931 6.2774962.5422778.6435651.8837558.5375219.0691144.8868672.704855  
4.1243737.8215177.5680735.63560210.238745.5095541.74631213.502491.407446  
4.3315854.2068534.4102813.48867 10.577236.58059 6.6672525.12827510.59118  
2.4982752.3923291.80206814.2698 6.3211544.5031261.5207731.1967252.131104  
3.2093276.4388458.9067311.5882498.7870775.0803661.1393553.9113184.12647  
2.6025334.9444758.6290531.8732134.5779633.3411082.3031820.9105185  
4.1045556.5942017.1096137.7858317.9288381.9499147.7261864.7649164.917738  
2.9459538.99262 6.9292562.7041864.5684555.24062610.336944.4552373.617614  
6.1624 2.8772934.5411525.14787 4.9475813.5284692.4786874.5659835.212092  
4.3267374.22153212.634031.9447254.8596989.2800073.3010893.2207596.160378  
1.7603453.8829348.8458194.1089185.0934964.8492454.1207435.2176675.647446  
3.5408958.9080362.8881398.6761375.93281 4.6667452.6846753.3889394.710563  
7.6513953.4851954.8679172.2107145.0797336.2280911.96599813.112457.729815  
2.7070715.3721923.5717992.7554529.2860811.9822230.8439259 18.62788  
10.241341.41312 5.3719874.5520073.3311744.34145511.701552.2615741.851273  
2.0181013.7799781.2306843.8615543.08339510.045883.90036916.0597 3.425121  
3.4891814.9774844.9213264.7291812.4222727.5533357.8440687.2823512.238615  
7.3403395.3890912.5479538.8177333.9247947.0485526.4480057.1911687.079515  
4.3088452.2980653.1521386.5159176.7176641.7180546.20018 5.5284224.887998  
8.07504822.136784.5026952.5106413.0223695.9079425.15847942.559223.779857  
4.6757032.1071955.1348492.7010275.3407345.1380094.7351562.2360563.343669  
4.7333198.1046396.8438033.3876915.02707 2.6661766.2076073.09331 7.479057  
4.56053 6.7501716.77830110.841027.4079916.9005325.1057225.5869568.191772  
3.2360971.8802055.4432927.0003584.8288331.4743673.3839793.91876717.09483  
5.9053394.3900466.1285913.5101843.08193 7.5532716.4229842.7967785.959923  
3.9928991.4557171.6634415.23168 2.6945962.5192964.4201184.3891958.158666  
19.897565.9826412.68967 21.234753.6851952.4338145.2745588.5845285.681863  
9.25608314.103453.3117298.3372658.0121158.85787 8.0935053.4010835.06164  
17.5556 9.2861722.7927392.8102454.2575786.00013 9.0446235.43489110.02078  
2.81009 6.4464194.79568 11.7687414.359445.5841286.4534144.4010932.855355  
4.7774262.731212

PHKG2 3.69127 1.3173533.1091961.4455952.51127 2.8089321.9407832.945228  
1.4810840.9113833 3.0696772.3382342.5295423.6210981.4838725.966745  
4.27675110.103323.8208285.8989313.9934293.1076819.0172515.1429053.61987  
3.6975725.11764 18.168788.2375935.3343983.4922058.1864227.1773474.589752  
4.2290096.8592166.5836018.8528826.6235945.8359257.1349424.4356296.381048  
6.1040963.68074 4.2065075.9037594.1663174.3233654.6201323.36891 2.939607

5.18021 4.1474148.6890785.6148 7.3018263.4793993.8133436.7218567.831911  
3.5999332.2410028.3446966.0192585.5244678.8975443.5419162.25901 4.273858  
4.4654664.18104 6.3784823.1423243.5522787.5229763.3336674.9286078.326088  
6.6785265.7698414.6423663.89223210.889732.99864 3.3699063.3268563.692878  
9.0086799.6002734.2776824.4215627.1213353.7744536.43757 8.3635094.798015  
5.0107164.94034410.429584.6019993.9231348.8636754.7928965.5152754.342011  
3.8629413.05386211.9641 9.7763946.4637653.5909755.02451 8.2120596.105495  
1.9446019.2925634.4672294.4542025.9844934.2845823.0355942.8944335.52464  
6.0531223.1561837.0422163.0698165.32483 9.8622572.8134442.8659774.446671  
5.8867975.8347364.0276486.7023686.0194475.67752 5.6200467.8908565.58208  
2.9419716.2497073.3523853.7952292.5338766.7070145.5189294.0806484.772348  
7.3462097.7930924.8514073.8705255.3328226.8649227.7743094.9065145.675775  
3.9419668.8346394.1748685.4333583.1576157.3329688.3993123.5619633.702326  
5.4290713.6483956.09196 2.6043393.3137367.22370110.9520110.273453.636021  
3.8958978.1935634.2275574.5131243.7620646.5577266.1522244.8136364.536787  
3.9180532.7329456.38229 5.3267915.1550383.8356084.6990257.2445125.230294  
9.8410915.0343823.1086954.9409666.8041519.7769192.8029433.0592594.132229  
3.1925965.6020653.9143345.8789374.0019784.3520072.5685852.5961535.864927  
6.4112353.9199126.8914097.8883363.08968 3.06910514.476794.6583233.288027  
6.4915213.4717714.3767362.82065615.690186.3609537.7465156.1523817.31497  
6.5898644.8390515.9987164.8948246.3738726.5717879.0899954.6742685.197069  
2.4948338.5229753.6352994.4310476.7114778.5970025.1772624.8902993.26833  
13.157918.93088711.965077.0526946.79165 3.1546124.0723776.7025189.928893  
4.1718217.1686734.1614246.7900384.4172957.9110782.5760784.3705745.238726  
6.5047656.5596148.9886296.2928976.2381844.0108187.4850822.9606798.509586  
4.2075468.5559575.2339417.4123235.9976034.4998287.6285913.6576149.985685  
4.7918024.4347774.8024623.1887043.7905276.0026373.3409522.35691 4.484265  
4.2756396.5609573.4319132.3946714.1856763.5292872.7107 4.7875699.095085  
3.46117 1.9754965.3109898.23809214.123361.9896012.28987 6.9310995.705378  
6.2442855.3071434.0861113.0252023.4615585.1229774.6246094.0357483.079118  
2.5100867.7709224.7074525.9731865.8863175.3755664.9906596.9971886.02747  
3.6242534.6261896.3472115.9025616.8723774.2247087.5190143.85491 2.64976  
5.17051 5.2043325.1601026.2176026.4201917.2672265.8759147.1124915.972726  
2.5001956.0119444.0413844.03568110.583262.9745114.4642145.18728 5.848324  
5.8748667.3878173.5346995.03253 3.9774624.7871375.4167689.1467992.532579  
8.6833084.6498617.1089792.6972046.0936195.5066727.9371283.95415 9.778052  
3.12416620.719464.6740373.1327993.8120453.8718994.2593523.5258691.673107  
3.3915093.1188865.4080598.55415513.889243.0950975.1189 4.6325152.849885  
6.51824 27.5855 7.6034225.1631059.4683383.1461526.4048234.4342619.192368  
3.4524855.0692833.9625764.4056694.4924384.4813645.4836924.2141157.221182  
2.6271923.59213 4.2652186.7784756.15302 4.1636883.6728055.1197578.980799  
5.1852078.61368211.455543.0344535.7337664.4152637.3891674.33152414.57659  
HSBP1 10.976234.47367 14.699554.7778079.1945169.2194786.5088927.67043  
6.2363974.67961210.8322412.188289.81446710.772465.1442918.43182911.92507



17.1935813.8075 17.2533310.708529.46551431.9900413.2292317.6478421.19336  
13.562428.75653516.9817 14.6022811.7167310.2784816.8561415.5599818.06138  
10.383439.27373216.2441718.8855 13.6413316.7688717.4452824.3510710.97777  
14.3299711.5511317.7816116.2867817.579116.76692413.4925116.6844315.18386  
15.4362212.1598 19.0053317.2110311.250838.68319710.9336 15.2572313.82444  
11.1425417.575875.1625087.47253610.6400318.5090311.590567.91383817.55626  
23.1112115.018498.70035919.6635515.3352815.9295111.9435715.538 14.57497  
20.0913812.8650720.0139517.5288418.280748.945 6.80143210.7449413.24147  
37.4104619.3152914.3553616.0798113.9624313.5695323.4033314.9694314.74804  
11.6095212.4425511.341 6.11779614.4203523.7658522.7126314.015428.175674  
6.80157614.9440413.9214520.7845916.4312 18.289166.79608917.1626214.09547  
13.1483410.9881216.5873113.0006610.0052619.456647.54273715.2865314.22857  
11.9107233.0811 11.8667713.3146317.9765413.975929.9911466.7731918.332682  
6.32446 7.55054 21.9370512.3270911.1802820.1211720.7015814.485 15.84477  
18.449039.66772616.219889.1063714.35250215.4963514.8183325.384918.25157  
10.5366718.8870311.4539 13.9288710.3345718.7853910.5104717.0096513.79781  
12.0596916.9636514.0942834.287427.47732210.857088.46079612.926079.597743  
10.0528715.811397.1656239.40396612.9384415.7552 16.508717.57710916.98039  
12.6718321.6661610.0345415.701 16.0461 13.8530818.3748316.1285623.31373  
7.4718179.73307813.2410312.2863812.114599.82574756.2225211.4146511.08848  
8.20931514.083989.7693339.81465 19.4144214.6607712.5151510.3890712.17676  
8.91457517.4571710.054738.6997528.82830212.4633613.5529323.4791910.93149  
7.43379415.8056317.4532113.9075210.0697720.318134.64605924.1612921.23481  
6.95855 18.873458.30266516.2477620.0830414.5244417.1005913.3857115.64416  
16.6816319.019918.71128515.1133122.9378716.153829.08483417.623368.952419  
9.68826 10.146469.17078417.1918621.2492314.6812 13.147588.59649724.80498  
11.0875 9.31936612.6971513.0074 8.52976610.3425415.3374117.3966711.97816  
16.7532911.2775618.0956711.4640316.3871113.164996.35794251.7017319.68028  
16.8181718.8770717.5743910.7313724.4837713.375238.70278311.2345 23.04327  
17.4559815.278317.70049510.126796.97615914.6124 12.6570421.867178.363465  
11.595538.04775 12.5882714.6128420.3921611.920489.63505913.7793812.35656  
7.0288688.4326169.21872613.9323311.6592411.531348.3338168.51285317.15154  
9.40806822.9161618.8367110.6745 9.69815816.2840913.7548117.218548.207541  
10.700887.50048513.9330718.8575114.5520411.7555512.0209113.9905216.27063  
26.6718813.7081314.7756612.9104517.1768712.9824516.7266418.2959412.66241  
11.550368.71838410.5458714.509687.2945 23.4884610.758678.82692417.23039  
16.1741115.9624420.0862330.3557414.8956410.156288.13017419.504298.013264  
17.2810416.915129.20411918.3666415.4789614.3190211.0221713.0718316.12031  
18.122629.3440279.61033312.3762730.2209919.700059.00305714.4539517.35906  
9.46119513.7258616.2183436.5767 21.9300114.9964710.7913312.7362 8.551562  
11.988786.75852116.9850812.2566216.8687212.710098.8585298.65598123.95335  
9.99368 14.8716315.198489.90005113.2356516.4486315.5660214.4435324.52561  
20.4024411.7775810.0701720.592529.55646818.2431115.5768514.690127.731694  
10.7635814.057476.7048978.71840521.0087112.254476.68299511.3815211.20248

12.6897513.4345518.0042614.1502815.5662915.892729.85913820.5874217.98749  
12.577757.30687712.4918710.676177.11160129.366649.70240310.95002  
ACO1 5.06419112.5575 5.76562211.615834.2179175.77221311.8397510.54072  
15.9398813.424056.2472599.2859717.17615 7.12786112.870665.9367415.46432  
4.76477 7.1642312.6494675.57922710.639066.6122762.1952543.7761244.976166  
7.0982359.29595815.650913.94789 7.66675 12.626153.5231295.97318 6.704728  
4.4624888.4561543.3805995.4405487.1389446.4326564.3133982.72677 5.624109  
4.51283 6.9936886.8051875.7307515.8670754.8942963.9763944.82189910.48622  
5.3341034.25469913.521763.1073724.4728393.8069614.3893263.7919274.883273  
9.4910363.19413 10.645436.1208085.5792373.4472417.19861610.030433.886882  
5.8385933.19872710.557644.1924196.9744198.1341713.1416755.7329373.912531  
2.7895355.14295 4.4509936.2830145.9417337.8778487.0499926.5948924.414882  
5.5191972.08925 3.0796585.39136611.0764410.358344.1850234.24326 7.453886  
7.2856712.6067593.3468633.0349183.4238133.5742112.2368355.3771596.565215  
12.924169.4466946.4779122.0265394.79055 5.74240213.906892.3164439.364799  
2.9433714.87260513.407241.6444236.46609 3.3685622.9647219.16471710.18274  
4.9794065.95659 8.48744212.227998.2550995.1269564.66842 7.7288929.581632  
6.1508345.1917666.7716686.6055415.89945 3.3541695.06232710.333633.40295  
5.5683855.3086673.1200526.8338670.7295601 1.8556746.0733882.892643  
25.879262.9906085.7841425.6347943.4924335.4425795.2407094.5714962.191982  
11.6384111.061336.7084756.2341813.5302667.4939055.27813211.7186312.05426  
8.1779617.4964323.9549298.19277913.4162 2.4468297.09457 6.9885794.610358  
7.1028894.8525667.8430467.22766511.970299.36620911.039 10.101793.384734  
5.9337177.8528472.2379685.8009953.7448617.1942684.1916412.1548653.017375  
1.88070813.350352.4837064.41683 19.983343.8991795.8462246.4298458.836768  
6.1122724.4551024.8638964.2644698.2767513.6275298.6687929.2859477.030144  
4.30134 1.02492910.232961.8331876.57581421.393575.4178139.7117575.410628  
2.9669166.7497743.7997928.3369768.9892093.9230741.8057753.9243692.369169  
6.4272815.3932750.3145637 6.18412421.278452.4653465.1159025.8821025.65556  
10.6801815.629179.84476 3.4917966.2548957.8762078.4744146.9067674.895578  
3.8335795.7454352.7443587.8323257.3172237.1042315.8207599.2601291.909464  
5.8298573.4733914.5517977.1536674.6862743.4413438.3074767.5224735.733823  
9.1084226.0511954.0181453.56183515.148222.38177535.027377.0821914.807822  
4.52522 2.3776331.5375597.4837814.4485728.9420885.6754013.67436 2.474869  
8.1060095.1452295.3007888.6986866.1298112.7349339.0167135.7576178.190796  
4.5580939.3464425.7632541.9348514.9530453.4972587.1435419.91849 2.569209  
1.6522848.7848442.3862843.2406255.32011315.270818.89913410.243346.236307  
7.7558726.3069088.4155427.3914834.2475482.5345556.4469335.4951986.133096  
3.90623 6.1012577.5968588.6608418.4036378.61939711.151474.0281794.283961  
12.212488.2257982.3587433.94131510.7464277.6017313.973066.5790783.522853  
5.4372762.4846638.3963014.34423 5.83954311.468598.78543 9.1777694.431878  
3.5485512.7404634.2987626.1093916.8180087.2030934.31518 4.6259665.573271  
32.6201 4.2349375.7640293.7286371.6533616.3551194.1955687.3646795.015796  
3.0964 3.9760817.1507534.5860514.6413793.8180269.8161 1.5350956.547605

9.88712 15.4988 2.5103023.8635029.5874372.8648362.35955413.622366.0737  
7.04587110.499653.8514724.79109720.780796.40544910.736535.74953 2.866685  
5.6802331.7510363.2673296.8114965.3314678.3925043.7233577.91823 4.473685  
5.7094075.15087112.316047.3637414.1744783.6619221.08691 4.9677043.807134  
7.78541 6.3334035.8552354.7877634.2685227.5465194.89179613.973791.913516  
6.2623026.77871 8.0654697.6968739.4409279.87788 7.0380498.6611382.68237  
FTH1 182.9878170.1769171.9744202.2144138.6144218.1167206.1632203.5041  
146.7736193.496694.81727241.6173176.1719387.3947223.437 203.8308246.261  
280.8251331.1323188.211 362.527397.91921239.2771502.6508185.8747304.2154  
233.9467401.708 194.9383412.6117282.2379133.0934124.6319277.9787307.5629  
70.62339185.2325198.5567393.8 386.4808301.7656103.7415211.092 210.4132  
219.5881269.2271167.4071188.5131165.466687.8962 197.141 239.02871324.186  
202.8058147.0225160.5194140.9119279.5746288.7539283.1827218.3962786.977  
529.8144178.1739227.6345190.8562336.2954441.101 223.6677157.3123269.6902  
132.0258291.5646627.6201173.7353329.536 132.9779496.8538153.6222160.9648  
272.3537144.0766270.409599.9444 105.4096109.9524322.8673172.0282252.171  
124.3495200.7661260.7826539.9887140.5226302.5536662.6986117.571 156.7015  
220.966679.48108149.456293.32215133.0495302.4545347.5986213.4617354.4317  
29.55338211.6307336.1751263.8039200.8622173.3071201.5804175.2899205.3076  
143.6306283.1819271.213 220.3203291.5206595.0107214.5372113.3607130.3926  
191.1547154.5958204.2523282.6117131.399 261.4741248.9586207.6447376.0428  
181.9285308.0344152.3852170.7706218.3185339.5809151.4329552.4354226.8598  
841.7732144.2139148.8431179.501712.30884126.7117208.849 242.6874290  
70.28894370.7072159.706483.84204200.8887186.9743143.028 216.5496252.7581  
326.4586328.64 227.9045137.9983391.1864100.1984158.2435179.8043665.5989  
787.9804249.5463323.9436402.8866150.721 139.3933171.2786211.7635183.7581  
236.7751153.036 207.137 467.6402613.2727226.5441502.2649161.289 124.8165  
243.512958.1763 305.304 153.8155403.4146196.0847135.385 211.758198.62936  
221.1773476.7747140.3206210.992386.62533333.2466326.5925214.9066276.3136  
138.5543169.325 248.3654129.7756288.1201313.143976.66393161.3901186.1421  
163.3613245.7276126.6723128.071 617.5138172.943199.90251119.8079266.7577  
89.59424356.6118178.0772202.5022470.5852253.7103184.5622195.2939215.1579  
388.4413113.8645193.4865159.8789489.5475477.1257788.3541270.9921583.978  
379.9109204.8456232.2769173.532 530.7176134.6966208.4618169.811 259.3407  
221.544 163.814 160.6543498.425 160.1368471.5235278.242 282.7654211.3854  
164.9851246.1342189.7197283.0783294.9106216.0415206.1269191.4794199.2308  
468.5915379.1441136.7576175.6786220.1274176.3282183.3555128.9793393.2176  
111.4015151.7123211.9113681.7226111.4406650.2907205.1045121.819 223.1487  
360.7475397.5014167.2891242.4206339.213672.49043250.3292320.6329223.7668  
157.1715166.6763195.8307239.5346112.5984168.1212245.7878110.1672149.4711  
188.3025334.2107170.2235684.977652.4202395.44116520.5866145.4038192.0653  
156.9313226.7521180.9121328.9762314.3013329.6006185.661 143.501174.18832  
124.1819578.0543363.9152481.9106399.6398449.6475144.199 403.4271255.7434  
225.635829.83085197.7765248.2429377.3808146.8094170.132299.6345 383.0922

112.0336280.4804360.781 233.7177471.0309352.6342158.5776416.4046315.0011  
173.8318495.688579.33358235.1413191.9888523 456.155 450.0122402.0074  
158.071393.4432281.5115483.20707151.2538221.0886579.5427227.6466172.0479  
128.676790.39393183.7608250.0074200.3408598.425844.41633332.7168193.7827  
311.066165.52343222.4344282.14 223.8289105.1856256.0228125.5452153.3064  
243.7466617.2753235.5895106.525 381.8947115.0892499.7941195.765497.76965  
96.9923555.44251327.6081155.8991398.0353312.8314208.270175.41565287.2461  
966.0722343.9932450.5736221.7927463.770538.71597179.0816219.1988230.1988  
232.1597328.9189314.571 335.7252233.6422221.1323156.7641206.7793190.7335  
178.1664605.1661133.7346122.1089266.0713115.5753319.8207147.5917  
STEAP3 7.5460511.13421310.772330.8532663 3.43432 10.057813.7941393.208111  
1.1586951.26608416.515217.90201311.119417.2584270.7506026 9.936429  
14.680897.09860312.9601128.0907720.0156922.5260523.1027613.4255518.35516  
39.6167512.487523.4514257.35171713.048965.83007133.0507721.0188715.16064  
10.731399.2730771.97027911.008469.71331632.1539 14.9904414.3888927.25702  
14.6622 17.1393 23.8857910.0434765.2641852.4434423.4736 23.1753421.65386  
17.5107435.588753.97366516.5356449.6318 7.32031513.058784.81619926.09552  
10.4098323.2751 2.57747 15.346 11.707363.48593 16.9211813.635376.044397  
7.89899323.3412619.310496.94899138.017611.83841124.2572824.0929832.00339  
15.4072 21.760049.25631512.699666.41121 9.45541744.0358321.6849512.03457  
7.4366424.1214387.75965231.7196717.4884911.961433.24899923.5992713.0808  
15.0208317.6786 10.8741811.412319.30808512.4351112.1642615.0611940.17212  
18.0421514.576132.3139775.16422318.6391419.5818510.4828113.309 7.257327  
6.13102221.286619.4751074.70087610.7101 7.28897819.6360121.280782.707058  
24.3042722.006638.3153769.6338798.83213424.5919312.134846.85037315.13493  
7.9924583.59236711.188639.25827828.594290.8642052 11.3455510.36818  
6.92201119.659042.52480712.873671.1616825.3432864.22160716.5543121.1477  
11.9161 20.639831.16564215.8026740.913327.89385722.8504520.397487.346132  
24.367038.67145525.943625.65387545.0048616.3139 39.6200720.0809 3.479881  
15.0452811.4780421.539754.4302425.53623511.1479720.7151911.0099 44.40266  
19.072316.14783228.8521518.0431314.7862425.5412316.5296 5.19748235.71608  
8.36777 27.622572.08965317.83 28.794377.74656123.210648.12310755.64298  
7.67276218.2226 18.8517423.8535119.2028417.084460.3947265 43.3114630.1713  
3.2447141.23018720.4007912.8654914.0498418.3961 10.7873620.5260316.05318  
19.910563.72166 18.904854.78086517.4242222.1700633.7667 42.5149534.10954  
9.56549417.273116.08802913.4011 11.0722 12.8693 17.7911417.2528512.42161  
19.3665 13.1882811.3288914.009284.7558561.47958111.7932632.3107526.79055  
21.030672.2805564.07480629.726 10.6654919.1502725.8330715.4221 7.548594  
13.0907712.2117421.2965 27.8061732.3857710.3459626.4035310.0316913.38373  
19.7452228.607583.61599210.7598821.3752810.4952722.9113211.2294211.23501  
5.93672416.213247.9280739.92092619.705446.49948 14.9349810.089772.35302  
5.30071917.251918.7178348.7211036.83609331.6787613.6798415.200368.817745  
18.4814 5.99573921.6882123.6311913.204068.1794818.59092513.782971.73874  
12.4821517.412387.49734 7.06789118.8395211.1936621.6866213.935495.367914

27.4023117.0195119.0340216.7675512.5471110.6262116.8026 5.45602 10.9815  
19.5048 4.46419117.8851321.0982717.885215.0799923.02496923.5823512.33795  
19.372549.44024229.0123314.053493.98622916.667756.3041793.1001424.088494  
7.9619472.30257924.1653416.5411825.1115912.8519717.7376315.113358.31399  
12.9089617.819079.27930224.6158 8.35277 17.2043237.7794414.425974.467103  
49.4944 4.57708952.2930247.9754 12.8027420.5468728.7640731.7874338.66512  
4.87694820.0283423.1257136.0744214.474266.0559492.50506714.8192648.06659  
22.9119425.176474.24522326.555 9.02447517.1462716.3547230.830666.584944  
7.20821620.2000911.9245215.957541.89811726.8837224.5646 20.1825618.2052  
19.4072 16.080193.64986 13.470299.3334858.28014524.0864315.272629.24146  
35.4272626.6528131.2278121.676845.6019975.91625 19.0898621.0710411.66192  
18.455774.5916359.5747297.79177810.5883414.5342219.8688322.7843710.48523  
12.352498.00080423.112918.16858211.3847321.883017.08010535.0700213.66018  
28.2021923.253059.5754567.79453431.183153.6119646.11734524.3823614.17509  
9.748354

NFS1 5.00186 2.8294626.8385562.3640812.7487753.5929123.4921853.555577  
1.9330721.9923623.3124723.77312 4.0668382.6744232.67074 2.5109444.759296  
2.7540354.3423965.1069145.8075096.20484711.250444.9846169.6652245.785995  
5.5564218.36000412.009925.5684484.8588223.9134475.2087925.7859095.801986  
4.4489466.5036834.2200818.5607864.2816488.1245012.9920914.0591544.503047  
4.2244915.1076624.1192557.01554 6.3774365.6206484.7049714.9245675.013984  
5.83846 4.1106059.14192 4.4958185.0443414.05397 4.1615413.2573566.573094  
7.3623396.1959914.3293063.97288 3.7683574.1649835.4875544.0823886.242682  
4.58631712.276723.0708233.5136425.4250672.9762096.7028496.7196245.529628  
12.439934.7401653.4454256.3393596.82169 6.4583884.0748928.6970386.231411  
4.1779796.2005064.62146 9.7279717.3965846.3224566.4617214.38917 2.587363  
5.2967777.9984186.8559493.7358144.8901127.3803664.2653273.9684334.371312  
5.5273996.5772188.1080694.3904093.7306535.2083349.5007016.3246915.872432  
3.31467 7.4485014.5018886.8255075.27721 6.5667477.15127112.5365 33.88372  
5.2103954.2303847.13918 3.2982833.8009754.3944825.9127876.5287583.368251  
4.76009 7.6892774.5947147.8256495.2209395.1730956.5213455.0945934.776556  
6.5215726.5279744.8794963.3383566.2756724.6289723.4410775.8655455.779362  
5.9635275.9990738.2883827.4329037.01299 4.2953373.57891 7.3183797.820968  
8.0937274.4841655.5520467.5118928.8162757.64459110.521185.48417710.35665  
3.4313292.8545463.5952645.3217943.99815 6.83228 9.09490413.557065.144831  
3.2806276.8776387.2176755.2865917.9971575.6547325.9955117.6574428.270818  
3.3506625.7889179.33639313.308514.31327 9.2772 4.4288755.9826254.779697  
5.0743165.2231188.3988956.1345524.8096752.6849736.0624783.8398785.689724  
6.23899517.481165.7108365.8145225.6122415.1404345.6397545.4364977.196212  
4.7791078.0044794.8003833.4285524.3226896.2060175.8169063.5413423.511326  
4.1671735.8732064.6314049.4895673.7148445.8036383.4146376.9472094.300321  
5.5517314.5338314.2507219.8154328.7612555.6275973.4486445.1110372.060272  
5.9803845.59696 6.8145376.1126576.0538925.5154596.7193685.0093684.767518  
8.26567 4.3311295.5483753.1890855.8245743.6926975.64504212.198955.532121

6.2533314.2529194.8900347.09025515.1834 2.72169 7.2625915.4259573.811399  
4.4739 4.6688155.2949733.8306756.5281524.70144 4.8992166.22168 5.096032  
2.8668187.9543587.6508976.5116964.51091 5.2756513.3590067.4186654.949869  
6.2331877.7349773.6060413.3383967.82573 4.9252723.06535 8.1054997.522015  
5.2707583.86040211.280383.5973514.5103454.4582136.1442386.7063393.630892  
5.32377 4.8888416.1613383.5623176.31743 7.3764236.1258975.9995154.680472  
6.6340333.5706275.3274065.3593245.51061 4.4354313.7294324.1812534.474875  
6.3364678.3150775.76827 5.2181484.1936254.7994378.29074 5.2158633.969715  
4.6031474.3889194.6793055.5814176.9248624.1349514.0542743.97447 4.981296  
4.4923426.4552495.1119197.7040127.3770664.95324 7.3352384.4147668.049742  
5.5747125.9894894.7780098.5895556.0434557.0165126.0187245.1326974.835246  
6.5212697.0639543.3741323.3394942.63376211.1303810.653315.4416842.890258  
4.59341 6.1246575.9857424.7414266.9392433.1448583.8577177.4374354.638074  
7.1496964.4999863.7793014.4095735.5658272.7734724.70519 2.83807 4.261762  
3.4513057.7400997.3136154.3320752.5938257.3337983.9922034.1253065.441531  
8.9452395.5734745.6362145.2367643.8710736.6689795.0082832.7710924.436509  
4.2371493.1462013.2680835.5527218.1781694.6979242.7486384.17306 4.843367  
5.1368584.9046514.8036594.4778173.7803654.9761695.2090164.4769684.966917  
6.2539464.8134927.0488266.7639397.8642139.7721074.6461927.017162

ACSL3 15.552959.10585511.410729.14882715.5777810.4123412.4150610.93837  
8.66006510.0832112.1790313.7179 12.725049.1208369.29409 18.4927 15.62764  
6.82727110.8573610.898437.32847413.8180420.0476613.7022914.4287619.09802  
12.448389.6515147.2696657.79954210.0113711.582976.27534214.2835422.42033  
6.8692164.8908157.76418 8.45257 7.3931114.71773613.5273714.041577.661233  
18.366985.3467014.3978575.6943939.03076813.8245918.5378 19.5097213.75654  
14.682135.25291918.7249 9.72770524.2399212.4953414.3511611.0067512.39285  
19.978028.6901248.86414 18.0632115.0089910.6968915.182639.88586 18.31486  
13.666847.22876115.749348.28105313.5733724.0251514.859356.02553 9.45891  
20.916659.44743711.3597212.7028725.464317.14936 15.6970114.3442 5.434262  
5.4805248.25760512.8990813.9452614.1307711.4371418.9724310.391298.916297  
12.061012.64747511.617073.6918175.70227231.1653310.528147.88017113.28057  
22.448184.28906210.2834635.101988.47621417.2208818.2976 12.0663213.41352  
3.35823210.061335.7978236.38158776.9196137.6997624.4681522.674567.937838  
15.6101410.4533710.607359.8795426.44162219.0156819.3944 11.301386.68499  
9.80978213.961145.28535615.4878323.495419.50094513.291038.40720414.52542  
15.3561 8.59045433.2735 20.636053.7647134.3112557.96939919.3095613.15362  
7.40798125.1692523.8168311.4965511.662455.6348849.24595617.7254111.37177  
12.6417125.3747112.1350613.498099.1555727.19199916.6893 14.4184816.38906  
14.8185810.1466211.7914812.168437.1442924.10389511.2273 9.2087348.471932  
7.24582223.2447712.7326937.2313824.970114.66798113.2016810.4944815.96682  
7.1328058.4813811.4492311.5741716.8899512.447087.19767211.184368.866403  
14.0703622.8008835.4516512.629488.94759 14.9486831.475079.26296610.97958  
6.48313116.7566 10.876859.6894088.64374417.5649615.0658 28.439377.797863  
16.6393 10.285637.4336948.46656413.186378.66006232.4252123.194193.209376

15.04241 12.09346 12.3878 11.81282 17.24178 6.02575 17.44755 19.58202 79.313016  
9.93049 7.94869 66.30639 512.82308 9.91223 414.76023 13.72811 11.81868 7.258939  
5.27194 412.52885 11.05351 7.56916 64.39103 16.8996 10.4034 10.41068 5.052708  
26.02058 9.69486 310.76311 8.42727 115.41506 7.10693 413.97224 20.40463 13.8139  
45.40308 8.26164 611.64701 9.74049 313.51136 12.17701 12.75932 8.32787 315.20814  
8.82498 315.36247 11.05625 12.97371 15.62419 7.67649 227.9388 12.34634 23.5747  
8.60978 328.12253 5.64906 59.01566 323.06039 16.36736 6.67935 97.57794 48.73818  
8.33815 88.39870 96.36385 78.13390 714.84993 18.10264 12.25775 12.46522 11.09347  
8.12545 810.35365 20.61284 5.86811 823.68272 7.34789 38.10756 56.21695 421.21364  
9.28699 37.58062 19.70503 4.46082 824.56299 16.66023 14.95599 18.58648 11.72396  
26.71004 10.11735 10.28886 12.4381 10.98419 8.12614 213.99408 16.90136 7.085247  
15.72109 9.68002 513.31214 10.90581 12.68609 8.98120 88.55287 213.35123 8.435767  
19.05908 4.62737 111.83074 8.80832 813.06207 15.52229 9.19331 412.55253 20.61556  
16.77654 23.17628 9.19819 515.83628 11.03657 15.11399 10.04392 42.81206 17.86579  
11.0285 15.75506 15.69748 5.75333 67.46202 13.92894 11.08567 25.06088 9.349864  
8.39290 19.70681 65.71994 44.41057 16.73821 718.41769 5.16884 12.86456 13.71374  
13.43253 11.96715 14.12696 6.27691 18.5785 12.45977 4.13418 77.63936 317.1567  
6.21467 219.9584 28.8605 414.9188 917.14037 15.30886 8.40992 310.97642 20.4003  
10.34291 14.95999 17.8297 511.3637 10.90345 19.04224 12.50726 9.74936 716.98622  
4.93212 35.07250 412.15817 9.15147 113.39334 7.99175 57.32148 92.15225 216.19692  
14.69892 11.18211 6.59707 28.26624 915.97258 5.43758 414.07768 22.52368 18.64128  
12.78332 9.29857 35.85197 113.7679 22.29872 23.34832 24.12123 7.19291 13.66216  
13.75393 8.67535 6.36597 10.87265 20.17207 34.69011 10.4371 8.102347  
ACACA 5.03907 87.67942 98.16291 79.23528 73.90661 95.73171 86.97697 97.398922  
10.07659 9.51241 96.55575 96.54715 68.72075 92.64022 710.16824 44.45838 56.869699  
3.18082 53.82095 45.00689 44.40510 13.95495 89.49588 9.22482 27.40172 7.879387  
16.65933 8.83988 4.20478 93.63677 45.19424 13.76689 3.12142 27.94095 11.33871  
5.60110 68.75513 56.67022 26.88354 15.71683 14.63897 73.18980 37.05194 5.551676  
5.11578 210.36186 3.51946 27.73193 48.82406 23.11291 45.94889 8.98720 28.56266  
14.04913 2.93265 29.30581 96.14057 46.45284 95.85096 13.31723 46.68606 9.098743  
16.43685 7.36344 69.89071 86.19724 41.52197 87.21081 116.79218 5.43552 8.996699  
6.14247 811.66167 6.16624 46.9342 4.20357 57.17573 210.32294 8.50435 2.851322  
9.71569 86.09236 74.86994 11.15142 6.09717 28.03399 94.98474 39.96819 5.203866  
5.31397 47.86817 56.43420 63.93123 17.72470 310.09803 5.54821 57.42054 33.136707  
5.57312 63.39047 55.80462 13.04035 74.52299 19.69687 16.24833 34.37403 63.710269  
9.99462 45.30321 7.78736 110.28246 9.56891 14.85667 68.31523 74.30301 65.077394  
2.25705 99.44910 73.30156 74.93293 314.25638 10.30293 6.54427 314.88813 7.843192  
5.30845 3.17193 57.45278 710.85307 3.55063 66.18081 96.90743 68.99822 31.973251  
6.77836 75.87201 64.92419 56.19031 65.92296 27.71991 94.51574 75.99759 97.318867  
9.19537 25.81934 39.98327 513.24764 1.92753 82.34025 5.21681 76.74117 64.381628  
3.38508 10.44404 7.95307 55.79131 14.795 5.30390 93.20647 93.56778 89.115247  
8.77040 46.51459 94.24995 11.77832 6.46509 77.43543 216.6406 3.86852 68.991832  
7.58135 78.23534 46.45691 23.47130 45.62522 615.7946 10.15241 7.09623 611.29003  
3.80543 26.55697 47.85715 913.19953 6.24652 57.51185 69.30251 33.41986 65.873599

4.2101725.7195766.1020726.2956428.7427047.1045876.0614567.2858122.911861  
7.11135 10.652925.6284068.04405 3.7661 10.56671 16.164653.2545885.591917  
6.4805397.50512815.372765.98629412.200357.4854 12.8813 9.0399922.371341  
11.705175.5627624.2380258.94993 5.7304914.4798448.8465647.9758736.03839  
5.2439385.3966115.5675 9.9754094.7244645.2577694.3756644.9927835.166202  
4.31484 5.6214614.1682415.55781911.1264413.4075211.0088113.1426 1.692197  
10.112036.3180194.8881833.9880546.3835787.63191613.1182114.271114.450981  
11.107865.0642595.0288112.96502611.624375.9874985.1143543.0703329.655126  
7.2207185.3049683.33017 6.2140648.63601 6.2821685.64973413.104475.660935  
2.6188782.02158 7.62799 14.776935.5235634.06202810.429348.78290810.14135  
4.02486 4.8284477.1777614.43660712.908996.6525834.8426129.6810184.958268  
7.8474453.9012412.97177 2.8890694.14087410.822773.9275656.0110958.934288  
5.69226 6.78964826.111023.5309947.5383165.4934387.07708311.685395.379348  
4.3801545.2777534.4866453.7019449.15116415.060198.6067725.36002910.38819  
6.9149533.47212 8.5567454.8536193.70649 5.9251354.2234925.3846355.163141  
10.312883.2338586.8070829.2004562.6915566.0775144.7755986.60015 3.631634  
5.4769642.7523533.8526834.3706948.38663414.670915.1903836.1931245.854534  
3.7492395.6328164.17566 7.25048 12.100215.4109046.21117613.5512420.33754  
11.9032 5.51958315.301147.78017710.285429.4510987.33523910.972015.046333  
7.07145510.660683.0847312.62106612.890658.5745035.6040644.8474386.506882  
4.5029094.34222 8.0045874.5854835.5367855.6550172.8657864.7408566.212212  
4.7612875.7200474.59599 9.5726136.2306957.9904515.2847746.9655559.529419  
5.28507 4.0134977.0455444.5897743.51502118.412994.3823676.06105110.55561  
3.6990352.3869966.2122553.7240677.7649834.4969539.2773361.5419024.361383  
8.8129615.6916112.9748885.37128 9.6930814.78304110.5225810.055376.695306  
6.0139226.2163784.9343863.7465173.19587310.771854.0376464.3402115.842556  
5.0706693.3374777.0404763.04171310.0325113.173825.4916894.158637

PEBP1 152.3155142.7287170.0688127.9932147.6118153.2831187.2191159.666  
110.8912117.7261156.0587421.7965195.6007178.1574148.1124155.3349333.1951  
302.2175257.6436232.5168479.6643551.956 321.8227131.9843536.435 355.2635  
265.4738163.3218578.0921176.5418137.670280.38531295.3513103.9834407.268  
184.9868210.7501319.6677240.4891169.7224194.2869149.2581370.6285214.5385  
158.9327350.2541241.2832411.9413387.404 424.7521168.1564120.6809240.2337  
173.8896367.274 178.0492240.097252.04635381.5085162.3951183.3123132.4988  
387.4955146.3793167.6405141.471999.16783205.2346154.3058150.9247196.6133  
161.3866676.8987135.074591.1472 369.1455185.1782181.5167375.0337260.8358  
210.8688578.6444106.912 221.1814225.0968148.0335101.1848104.2436302.4737  
156.3503674.4118322.6563159.0006164.4471152.7589255.3662542.9607135.6395  
194.1982223.696594.14367636.81341203.757424.8295368.7129329.0629137.6409  
218.294 157.8016188.3499272.2882449.0295202.345 209.4729550.7296418.6601  
197.7279192.9668198.4823429.5485204.3182181.6069298.129 459.3384745.1209  
217.1845148.2474396.046 492.4555255.7759236.704 77.59769420.6435112.6622  
88.68964163.0072599.217775.9176 185.1998403.4207380.7901336.3146202.2637  
538.6949117.8598662.679851.12584324.7473274.7378171.811 286.9755115.0798



235.211 143.7808153.6527555.3076139.499766.43429337.433 552.8041119.3941  
604.5825143.4071272.0796283.9895395.8141303.1977253.12981112.882160.0704  
75.34048135.5398106.624889.77603350.7528661.6617165.838644.88825550.4482  
91.43068112.7548329.1834147.0235270.6578250.0944186.7856271.9845146.7084  
116.6667356.67 143.335 440.7289117.2636386.6633249.4827243.5013174.2007  
283.9631101.8361163.9603119.151 472.6106137.9976142.4251183.872160.00536  
429.7962206.5077113.3776176.3748296.6749106.4039184.5426384.0505396.6694  
112.4078826.8251309.886581.1240196.7197 101.778773.10615136.8581518.8675  
145.072 683.2055147.1215477.0502108.37 199.3249155.931469.6597 181.9496  
305.6708232.3329130.3602168.8215183.329 111.0062121.2528352.049 123.4379  
1089.197251.4159256.6098233.9848144.7648435.322 180.3858151.8496382.5851  
587.9031571.7328189.8971221.646 163.5867425.1146160.9606401.8392177.8912  
167.7707420.4706200.5607222.5881240.3971219.3818303.8102522.7734156.0853  
138.4428333.7101218.7846595.9012488.1823757.6664223.5375195.1231321.6801  
209.2676511.8458123.632325.39553130.1503190.2207151.4048731.3746178.5715  
108.0643103.9359214.9863164.310760.99397147.3218237.8346209.3122112.4351  
174.1325180.7275489.4435115.5204476.8236115.34 137.9772149.4416115.4624  
151.2426301.7418142.0022242.0692436.1092192.5107220.7284158.0598405.4536  
308.3913256.4669187.8076104.3071138.2129149.265 99.8006786.86556119.7783  
362.6745129.0508210.048 325.0278103.1333138.4758430.8923209.9203441.4045  
115.776 340.4788150.9585162.1673277.1168146.1533111.397192.27566112.7481  
232.7069286.700283.1075 291.197132.24222137.0516242.827 140.1369158.5846  
332.1693101.4521100.4614290.5917248.578 201.6254184.8569288.487 295.901  
366.3612212.2592184.7187566.4865197.2613378.846584.1102789.7009 211.3312  
169.2767182.713289.47511236.0321287.240170.41123277.2775164.0039134.5529  
353.369498.7027770.57905257.7238234.4253344.17451062.40762.11932134.5786  
147.207290.24393386.9473221.8335180.0795232.6009117.5861120.305 222.9523  
363.6963203.7378279.5198368.051 104.8305440.4189316.5742191.8593136.9728  
235.0167110.3099158.9205229.8707283.5874190.066463.46122174.7048331.5467  
123.1423155.3241344.39 303.5174116.7241262.0275124.7076453.6151172.3507  
122.2447152.2957232.0758118.2997280.5258107.1206313.1443444.4856

ZEB1 1.99074531.021042.34856633.6155 2.0498654.89010620.3097 16.71274  
26.4857932.7233 3.38708 11.653879.7640885.24153332.5145 2.5470242.308278  
1.6481911.4959010.6535802 2.6672253.42784 0.6823966 0.4471971  
1.0714783.6595211.8676990.9199253 3.7422 1.1018816.3288891.293252  
0.2912434 1.1718622.9207741.1439374.9439872.0644552.08003 4.127296  
0.7426878 0.8878937 2.39793 7.1785460.4897787 0.9942233 12.17109  
0.4157495 0.5604226 2.2128010.6922096 1.6175751.3044680.9040599  
0.8993174 1.1544670.5755443 0.4077859 1.6082974.9774031.046735  
3.7200892.4422132.4817850.8319112 1.1692371.3824420.5534093 0.6327521  
2.8713430.8079201 0.2177717 0.6332336 8.9049644.1841231.809482  
2.9278240.5329806 2.2446930.1989046 1.4822361.1695912.2607062.559934  
1.8185110.8137814 1.8974582.5263370.4942239 2.2389160.2746741  
1.7981680.2643033 0.4355427 0.5160027 0.7235206 3.6687072.197836

2.4139421.0116160.4012559 3.1028242.6501510.8171868 0.5044883 2.77264  
3.0744127.9135361.9788230.8802812 0.4517187 5.0805680.9981741  
0.9185219 1.0149192.7354120.6782815 0.8269196 4.5010331.053059  
0.2978751 0.7543941 1.3105951.6295640.8512286 3.4077320.4109172  
8.0785426.8019030.1075631 4.3762563.6359152.7417253.0026782.71207  
5.4593511.3070360.9086778 0.6978339 1.1088 0.2885528 1.3227030.96612  
1.0023980.9950437 0.9492067 41.061230.5247574 0.5249647 6.360427  
0.5235650.9435241 2.0612490.7854483 1.5925892.3039131.2231632.500918  
2.53683 0.5607867 5.4589491.7931991.3943141.6932190.1327767 0.4460041  
0.7258387 0.9833762 1.94256 3.7610392.4410230.4350898 8.932423  
2.4287332.7398540.2894443 0.6784221.0026221.1290361.7650371.328331  
2.0523344.7637421.2927472.71017314.950340.9396065 0.3611929 12.53129  
0.7131884 0.2627356 0.8325674 1.8289363.0406992.3717291.639094  
1.6556492.9170690.9268442 0.6753141 2.3098980.9101129 1.109586  
1.8267248.9204963.0455053.5145713.7343070.1629526 0.3646206 0.2988011  
0.9654164 1.3454150.3182062 4.0796880.4045542 1.4083790.4328773  
2.6135621.0223971.1547821.7758732.2722161.2822850.3998823 1.42508  
11.537081.0897891.2860440.6031424 0.8017063 0.6759178 2.72904  
3.7602770.4860842 5.3456423.4251890.2504598 0.7246541 0.6585283  
2.1662764.4629830.5912228 2.7517961.1689541.2520450.8781399 4.025754  
4.4980010.6670673 0.5840763 0.3377295 0.3698998 1.5805762.417537  
0.2029517 4.9255212.6415351.5109233.5324160.3584718 2.9434430.2976307  
1.8033831.6253466.2200010.7778985 0.2893992.9419552.2589871.968558  
0.8565464 1.5401071.8312210.8531724 1.4446030.7846259 0.3107384  
1.4888730.7330103 1.7063481.1878311.2948281.1624451.1525950.4172242  
8.3140772.8873470.4580394 8.36552 3.0096921.41729 6.0247458.933449  
2.7146050.27289 1.0487555.4197930.5467768 2.3100742.7728381.740865  
3.9638912.1871040.6850424 6.4229790.3944603 0.6065133 1.1015  
5.6923221.2060920.8647075 0.2653283 0.7905066 1.4141496.135633  
0.6734753 7.6134831.3951191.1608152.5169445.1177771.6183220.822761  
2.0370881.0627770.3447275 3.2457626.5847521.9831550.5211918 4.562395  
1.0035250.8427888 0.8137857 2.5985882.5186021.1668183.3866460.9650417  
1.2323291.5407670.6973988 0.8773734 0.4189451.6830553.9551941.12051  
0.2992189 0.3944224 0.8307506 0.6812224 8.4089532.41675 1.376782  
1.7074685.6757530.7187447 2.0241691.0179262.45662 0.4984424 0.7789457  
0.7377958 1.0056580.3885335 1.3455783.1190030.3382549 0.6686162  
0.4571348 3.9816540.8117096 2.3228650.5972971 1.7074541.717572  
0.4386929 0.3541088 1.7059811.13536 0.5000082 0.4001375 1.508237  
1.0096291.09374814.508611.5693790.4952182 0.8894442 0.8739510.3092496  
9.8206161.5343421.1690120.4053415 2.5843122.7755631.4997563.550832  
0.5787691 1.3412890.4072463 4.5400892.67111 6.83919 1.8483911.030206  
0.4339959 0.2559033 11.953090.7888007 3.0649852.1925953.3988  
1.9292380.3077774 3.46972 0.2815845 0.9776916 1.2597941.374646  
1.3531991.9881461.4196641.43063 1.0988690.9761714 4.3123941.545419

SQLE 3.1951751.19485312.004291.19825517.328646.7514651.6757361.456984  
2.1578841.48808521.2275613.712094.0174034.7235180.5618387 10.87931  
8.66517513.094755.52636521.9983215.0628 26.4051813.8881454.5569225.82092  
74.3360819.6017511.2906 17.666019.11366713.116017.16858 4.66540114.56237  
11.609798.89078915.8933222.2081311.526598.18616419.217336.90580515.73488  
19.611218.12726125.353444.68898737.5039334.8407749.9688 34.280389.85839  
11.7180310.337731.23721914.2916722.3680527.9043731.8168 55.4882817.30326  
9.15756582.7256 13.7757120.2607410.678816.9443211.539512.71430317.87676  
37.4374536.8163935.9048113.5321221.0321611.4165841.7928722.9363716.43916  
3.15794766.0466414.3472213.6545832.9737132.8117932.3173622.871929.914687  
5.32630520.4897828.0656314.7700911.1054526.3807519.3324 15.1174622.88649  
14.9662927.2220311.0291916.4819511.7576712.9704915.904057.36569817.95513  
20.7440623.5669610.297978.66985720.0050118.4524421.2638421.9024731.8819  
27.827421.25630415.8847311.3633925.6670816.7180649.1902536.9203423.87501  
24.216176.1338848.44483181.0034113.674168.5741097.86778711.1551416.11906  
7.94688752.3880815.4650917.6896316.4668824.6023333.7546820.3825612.98206  
8.26582624.0947220.0556592.4730610.624622.71129 8.71496121.2733724.66186  
8.64803310.5804981.4643227.1217410.5579 9.07992122.095628.49869 16.24665  
16.5147215.2866 29.7996127.4902920.1098221.5949419.8875725.5139810.77824  
11.157837.20316121.4112 8.20249629.3118829.0328728.5982112.2988723.42392  
9.7414736.10610312.3475619.4798122.267 22.8714814.9363 9.05245327.06387  
29.178126.0040378.53831317.304419.60705750.5114817.6222817.1118637.95357  
3.49236223.0939324.4105816.5776318.7780223.7138821.2144915.182876.185141  
9.01824 12.8625615.8120953.6320114.5843321.9759246.6143537.1550129.54714  
16.8073815.974869.6615253.92447412.350545.0893694.70861 23.3822915.88707  
21.702119.96669710.9610823.3306631.8246922.0095 13.6720628.563616.734984  
18.8729222.7812124.162336.03654616.6749741.3291512.5602539.6271635.74091  
4.00193122.7405516.9169214.1478230.8511610.6299 28.9984429.5714320.54593  
10.15429102.852510.2014527.678753.80897233.8138712.129 22.9789 28.54701  
30.0244492.6437524.046316.11027317.5983719.578889.1971219.62800116.85758  
15.508159.68597551.696827.53845553.1014821.4880318.2030914.9480636.9378  
26.3766410.7511453.2280515.9648810.66765137.432331.3866 13.3919314.53691  
6.12135318.421077.61067221.665377.37431210.0296832.4347413.8883930.42037  
13.3400333.2106 55.2734169.7567 11.8296638.9889932.794025.0912467.779698  
13.319188.96570312.254169.26425710.0791935.3530217.4873113.9294811.74707  
43.0128831.449228.10338716.4867210.5803 10.7087620.6883826.5539820.25029  
45.2889935.6655415.0286914.6106354.5829 6.8711397.18212839.5046411.52864  
34.3207 17.5462 24.3173514.412329.28582 2.53030336.0889231.6721845.77686  
11.8923629.489284.13915810.7712218.1173312.4027833.2894419.9742425.21617  
16.5560916.8409420.3105128.7613911.5012623.7357116.5915 43.6472328.67083  
56.6981128.6493315.444712.76048113.9202324.0777 38.152655.2045139.219031  
29.0305534.837063.88621157.485737.40813522.9343410.649969.94549710.03515  
14.7410816.6911122.299845.4141028.8214297.98148428.2546145.5463568.10987  
71.171765.3558858.35263814.2787917.1371414.8511228.4588610.6838613.61289

40.2279412.453561.6740747.03293426.2096417.4417732.8857427.521470.5012865  
11.6974915.7922227.193987.98841321.1618414.8370520.539738.63253320.34044  
40.4340614.7742611.2293616.623676.26115637.8510711.8280327.5557515.35949  
13.3703 8.0279758.89811425.687277.84810613.4949855.7203511.5141125.16202  
FADS2 1.4664146.5257491.0548395.1377120.8182502 2.4276644.4635653.449012  
8.4015264.1685651.89143411.325266.6575052.1849982.7482211.1269471.146038  
1.7369331.1273220.2719863 1.5707731.70197844.6873511.311355.156556  
30.836419.6392031.4084824.5863274.8680434.2497220.9480622 0.8729634  
3.4103846.8990311.91471118.4882621.310174.6528914.5719731.4410470.597808  
3.0156865.3939250.4103745 11.439075.78058655.707173.47741 1.0586742.24922  
1.7629463.4967053.4713720.5529774 1.3772195.4503460.3019081 6.007248  
11.250581.7925931.7475363.2209672.4186274.3168220.6548478 11.78367  
0.1578745 0.3210841 3.19117715.081630.3749076 46.8357417.75145  
14.949943.19284412.3128816.6585 26.885210.1304617 29.384480.5851074  
4.9428766.0944431.1658271.6858851.55552 1.9988021.16939 31.2077238.1942  
2.5672610.69980115.348160.7256009 4.3243259.13854412.0425521.1031  
1.3346380.4846094 0.9034125 12.516042.1265450.9015741 1.398569  
3.2267181.03322911.716060.9916148 13.2976 1.6627190.6617552 5.901839  
0.8794778 74.234040.4094901 6.10138113.855268.29118239.0981666.50119  
1.6056133.0944882.4619681.8730280.6485071 6.0020516.8476020.2346937  
7.6390964.9066260.9070097 14.320563.58741113.054694.2798541.254712  
52.4730719.674190.8365935 9.8249321.41806344.208731.2124971.096683  
3.2240550.2274026 1.2495144.7014516.6449177.3736432.85005741.48623  
2.8431491.4269271.7930392.7314785.7769046.6461992.14612311.808711.114336  
3.6249346.49292629.400214.14128933.0356 0.3616167 5.2840040.7338988  
31.268659.7160453.54843118.098295.1183835.7009561.9554915.7098782.010808  
0.7326625 1.12143360.8764 1.01014 6.4565713.1899186.1773861.590675  
5.9474950.6372118 6.90605613.699979.6892151.86404537.535275.491943  
0.8205197 23.7548 36.055021.11882211.186120.7181797 7.78193931.54796  
4.0157531.96739410.806665.7135620.4649926 0.2078736 20.896371.743508  
3.27838612.488722.73140713.743981.3916070.1554778 1.2276871.427312  
5.8989222.6073341.81862717.441170.28603120.146424.12009 1.4398395.611347  
2.3440991.6376910.5690258 15.535924.1689962.0625394.7465633.03079  
46.9251859.5663828.0837 3.7810893.0431161.8714761.6535842.4494 3.572083  
8.35701 27.3119531.408956.3167381.33788541.606840.1923544 1.823207  
3.4561180.6496074 13.611567.2433531.25157918.2428221.085414.547907  
1.9542441.4649091.2874996.28576 38.058983.0055274.2141638.76401117.34649  
2.11352969.966324.09912716.7157916.0260126.026214.4500024.73120722.68315  
11.728261.8637293.49930514.276961.68578316.741884.8180227.9880450.7423413  
3.8682069.8499522.00880414.107882.0305723.39455 7.0661538.9461017.804459  
0.8538086.4079842.1074291.6489071.2077735.1455520.3734294 2.16046  
3.7003253.2715279.5638921.4422133.7292770.8283795 1.0288 10.76823  
13.797974.7048561.9727062.6217961.2757473.0155033.4927713.0196731.042034  
33.755363.0946850.9682805 54.240524.6496677.6927486.68256526.5111315.7939

0.5802508 0.6464829 2.2655529.25312 40.7380116.3849 2.5069511.976975  
1.5503748.5964370.3577296 1.8991527.2751863.0672445.1506273.989539  
43.7970314.6209 13.236283.13461 7.59533210.145520.5622235 3.858847  
7.09769670.682644.4687741.7785061.6470480.2891671 0.34844433.17376  
36.032241.2119753.50719113.158481.2408930.1446995 0.8429913.645038  
1.90545847.398980.6663004 3.7044936.8981717.47316 0.1226957 2.169515  
0.5563080.2832997 14.0009319.471821.50022223.157443.1682521.795379  
4.9747851.0773282.0619668.8888274.5316656.4397524.1930448.1708710.5342519  
1.58791 0.9728245 7.9168656.81260843.206940.6965425 4.92178422.85296  
8.8332945.3769559.41267333.630421.4981345.8399631.3733395.35832 1.83426  
3.6611153.8974730.4027275 19.427776.9106941.61391323.7917 5.729507  
5.3824093.0520071.4712191.4567852.09242418.874292.5014144.095931  
NFE2L2 52.8516620.9683449.6597530.5038650.5041458.1344531.4111442.2575926.1769  
49.1877836.1606846.9388349.3429137.5355632.9991647.9830742.1908 14.6734  
43.0633116.9695821.1495517.5137844.4207830.6800232.0754433.0383524.10601  
16.6553511.4017415.0926530.6634118.1279517.3276856.0090743.0866410.18587  
13.2569516.7047326.4698316.2475 15.2804223.0664817.7062923.3511642.08566  
84.843979.33885716.7745425.7068135.1297 16.1997729.7613921.8863757.91373  
16.7185540.8330127.4221827.5747 18.8242519.1972 19.3998339.6702922.85491  
25.9173927.1664337.757314.85482137.9069434.0449616.1546714.8751414.60639  
54.2457624.4188 12.7613119.2031221.9143655.0855512.8992726.9080328.17592  
25.0011345.8006530.4106216.4010126.6671713.101 18.812778.0103919.009064  
20.2417 27.9455432.5244217.1087923.4166811.2479119.2678211.4277426.11493  
13.0801234.3849817.9743121.9069423.2448917.3531617.7785113.8235 21.51548  
18.696468.22896 20.7257716.8394738.1615762.4784215.1054 15.105131.950466  
19.9560120.5967127.6514 29.9157329.2647 51.0791714.9931 12.4966841.22465  
13.4437324.4995933.7668918.4962853.8517815.3500840.2729712.4963620.90536  
20.2159615.1527215.4537119.3421622.3903422.5971929.4693636.2314328.07299  
15.2331611.353 39.019794.92384 14.9610727.1831726.8516 8.6725829.348652  
41.1820817.4995111.1026719.0002624.787 15.2016819.6977826.049 28.28351  
33.7937 21.1522126.9697343.0179 39.4435716.7729215.4881230.2835652.63108  
5.26518725.5981312.6357118.089936.39231458.1583 27.1906 12.4020914.50914  
41.3566931.7688130.9786840.5358510.7704435.0449517.9608738.6448516.05102  
11.287619.89880120.4248944.4792512.103458.04209520.4035615.7749318.75735  
63.3023120.5949814.0127313.2749931.1690479.9307520.5131929.9656827.29965  
40.1609223.4401427.6237113.6368440.7204618.8662 32.6513523.3487550.19302  
16.4151824.6050920.6561225.3969126.0285324.9560726.6196114.0348517.01535  
13.1073128.7158339.3465332.1152420.9069223.6593217.2385524.3549543.36155  
18.8282913.3646220.0987218.5099336.9653317.2539138.4010520.9983726.7735  
30.7166312.5572319.3877151.6480618.6675616.4677421.1583913.5290523.3319  
20.2070813.7832720.7709412.2222726.0179731.1558222.7359672.2956832.36435  
20.3681625.4984924.3373546.9334628.9227315.6385916.8150839.182019.822932  
21.3686825.3689220.9000416.4326216.8572411.8925428.5130824.0354 27.76302  
17.2076510.7624125.1667732.7769267.5268310.495068.90647124.3054237.03081

23.15737 19.53602 18.58935 18.06474 28.14132 11.68322 52.26299 17.79841 13.36834  
29.41229 21.16925 17.08161 19.74343 39.26908 17.64691 19.15973 39.21291 16.64581  
8.47921 17.13.77745 10.77815 20.59316 19.85621 24.02102 31.33521 15.49126 42.02649  
19.3479 37.75124 17.31223 17.59221 13.96504 39.90775 92.84492 41.39068 15.53745  
14.0133 26.58542 29.02492 17.18831 16.96142 10.65504 14.12231 17.61293 30.11204  
6.06392 6.19.34257 14.0383 17.5703 28.86312 26.70935 39.71631 33.96831 18.96224  
55.42229 24.27662 28.79954 26.56462 19.28818 20.30086 41.68333 17.66436 18.54274  
17.4214 34.19325 39.94815 36.05349 28.90991 47.43524 40.04909 11.12312 20.40153  
47.60472 19.42457 12.33482 8.057565 22.95977 41.36365 24.36658 20.55504 13.41789  
37.47297 34.00311 22.66735 19.86667 9.680156 18.07376 23.23667 17.52893 25.10121  
19.48447 16.09391 46.1038 27.2101 23.76065 19.94792 28.66548 43.16632 28.71789  
21.36282 19.1578 15.52701 9.988063 25.73586 27.56047 26.91785 56.09611 8.509325  
18.83837 20.744 11.1874 20.66746 12.05539 37.68432 1.873684 11.60546 26.47298  
22.26417 11.9751 17.829 20.0738 14.62978 21.90844 53.85774 28.41935 22.95957  
14.52863 11.14025 28.19153 18.31874 38.53399 10.74692 5.279994 35.33165 18.4671  
14.28964 35.92437 23.44218 22.74767 33.01469 23.89158 14.8019

KEAP1 26.74695 19.06658 32.79622 13.13513 15.90217 15.60875 20.17886 20.33389  
18.08322 11.02373 37.03437 20.26992 19.27767 24.20616 19.10526 13.54572 27.37959  
26.42146 23.43617 29.68976 53.81394 20.96875 27.78766 39.16509 48.11024 17.86236  
27.72095 34.69101 21.84742 27.95309 22.05009 35.30671 38.99373 33.10417 29.76431  
14.77453 25.21719 19.96245 20.31381 25.9922 22.52505 16.52279 20.93275 19.72825  
21.12672 31.64681 28.21494 34.31662 33.69337 14.35211 27.94035 37.78683 26.74158  
38.39327 26.60915 31.51269 39.04638 27.43386 14.52949 20.10518 23.84623 29.42243  
20.95263 31.79535 46.60145 40.8406 34.36109 35.14433 42.27817 24.23782 29.26438  
17.59958 28.71162 17.71733 21.32066 29.66711 27.27083 33.4135 17.13301 36.96464  
34.33676 37.31839 52.62012 20.3209 20.93509 29.02711 21.00802 12.44656 40.276  
30.7496 19.42688 18.29786 53.9714 28.86209 34.78565 29.34674 36.98057 27.25395  
20.71276 26.55515 23.06332 16.15097 27.6399 31.1888 30.74077 24.88929 18.76325  
9.86727 22.48653 16.81091 31.23112 36.2162 34.29031 78.36056 32.02324 22.61994  
52.20521 25.17764 17.06148 27.21333 24.76504 24.08723 22.82924 40.38036 16.61776  
21.64387 33.01689 19.43536 23.01527 34.25144 25.76558 13.30729 33.8025 25.20001  
16.31838 20.72095 18.41851 14.76324 28.0365 24.57093 24.62507 18.83962 25.99626  
32.73148 29.29307 27.36813 23.98071 18.839107 25.42525 26.05775 37.02987 25.79661  
13.71031 28.8332 17.96572 24.53569 27.96187 15.90895 27.31094 34.93162 30.96635  
37.24555 19.14478 20.56476 37.79196 36.70139 18.92184 21.02845 11.72561 19.39312  
34.78371 27.79214 18.08933 34.67606 21.01532 22.70848 31.02713 29.17668 21.54902  
32.15786 20.9631 36.809 18.84792 12.11157 43.42873 22.55847 19.11583 33.18454  
18.29041 21.41472 28.48979 29.71419 46.94328 19.76358 35.21731 38.09433 29.27013  
34.99409 42.96872 17.49176 52.71191 25.6707 24.96038 36.05712 16.09874 20.79522  
20.34132 37.29362 40.67783 23.41825 25.09138 32.09408 22.98485 19.15004 13.98162  
34.08323 36.22509 29.94546 17.49493 23.29386 23.91182 19.32283 21.21487 47.61735  
17.96115 22.33501 17.21316 63.54558 23.37971 27.32903 19.41398 37.88665 20.73804  
32.28588 35.01629 22.85102 30.82533 28.81788 25.95701 48.5551 37.22691 18.58107  
38.31948 26.62963 33.97967 26.59794 24.78063 16.60626 15.42067 26.91061 24.98448

19.8105918.6676721.8327527.7672215.0114125.1965 34.3555144.1554265.7019  
88.7586524.0621738.1301323.7163 23.1196821.529 40.0253946.8895629.8969  
26.9675327.6964834.4199420.9811520.9796924.4671717.8882526.3601927.39582  
21.4227519.1665324.6798137.3085328.3271971.1810331.8888822.9074817.82921  
61.5936224.2168322.6209947.6934421.4942420.7648236.2053423.4580519.67089  
15.4827713.3969626.7505520.3418530.108 51.3197121.3680739.4456531.65567  
24.5615635.9738130.2165935.5982922.0356124.1433524.8814728.8984418.71622  
23.9462322.3897127.4226427.1989339.0201736.3124514.1101337.6407226.94086  
45.0381323.2130623.3461642.0869 22.0832920.0799212.6762252.4653516.30533  
16.8229621.5544237.8717722.1740520.0998324.6683718.4027834.1403132.54211  
21.0636431.9065 33.5645757.6321316.3431925.6973831.8435129.9267134.26808  
22.9752224.537839.84558428.3916318.6466444.9268328.4675720.1131 20.30043  
30.6750638.6144921.6463115.4254922.9945839.2142626.4958320.5300136.40196  
31.7555625.2464317.6137133.1578435.2202819.2049 31.1438 21.1632623.13939  
41.4970332.9637341.1644426.4644123.3485117.4923220.5115 26.0347 20.82373  
24.8999321.7958 29.4934333.9014419.7564668.6082 56.8639449.2583146.81564  
75.9488725.1230952.1230816.1360824.3955932.1924422.1616628.5462418.04464  
19.1813715.6207232.1144918.3851 30.3207928.1558276.2121427.7099523.83806  
23.5291925.8188 30.8067728.7499423.7086532.6564621.3524542.4203623.82408  
22.2349534.5521827.1104731.1367218.3098722.9384830.7118420.45274  
NQO1 12.6951825.9378 57.0724 22.3981 20.676747.46342320.6893120.3537226.2566  
49.89394342.653347.1198615.7092136.4186 28.9471511.4337710.3268223.8131  
16.2091894.617231.87397575.04279116.2769207.46 65.7327286.1091434.75389  
128.476131.6769888.3021 35.0435212.2744621.4107136.7883896.7379182.10402  
13.2539231.7512569.8144381.0066853.3578312.2255460.4638917.281647.723206  
148.174730.6289159.5926695.8237 35.360131.44532130.6163853.3461962.44781  
213.562517.47876121.648 41.1452134.304879.95481129.6595262.17834166.9682  
65.2245520.3655 29.6603411.88624113.34232.4028911.6338649.4383257.48753  
92.34124380.918316.5297 38.1594936.5306 95.6498818.9509668.1643 102.264  
66.41724216.496 2.43835731.4436642.2243613.7574417.9465729.233342.698191  
48.3092324.27117119.357422.9675894.66483196.288955.2786712.1043740.08666  
21.5805623.7843213.48046104.668179.1763878.3409469.096168.04232750.36689  
133.662643.01041129.6525106.42127.28754351.1522 79.3772211.9521 97.23873  
29.5932240.2311353.4124568.63252115.655130.2713220.7762745.3176812.8331  
83.0041228.3730631.6374960.2243149.7553523.73442101.000420.4294916.54382  
44.560247.41370853.4567445.9992356.9847341.8638 55.7942741.6624779.23523  
38.5084159.75043206.03679.99710773.2500175.9841239.0958141.0304 3.046548  
63.970313.20095941.2090846.4564945.0644423.22202126.1704118.098496.19001  
176.035968.8663540.8958341.14948105.172239.22046231.00621.998332282.607  
4.99695713.6009241.51266171.29326.87767580.4671719.3168 51.0217314.14576  
48.9648 153.909 143.156660.2782242.4851533.7964 36.5026555.2811911.51119  
20.39789115.21015.698955197.418130.130856.54874 42.4919212.7016413.59474  
208.212314.894710.5045944 68.2163988.19144266.802617.771536.154514  
63.2768966.4336428.9986910.5294 1.61141 333.77980.9984895 70.1138

11.5373370.4433769.76411111.528139.0692323.7430335.8067326.6813740.70658  
76.7044524.5661 16.916139.09465355.88374278.400734.3053833.0534129.08981  
48.1020932.87129142.43896.1622482.98012580.9950934.40054434.8557159.0465  
7.916053121.020340.2684883.2223382.72969114.643 18.76632133.739722.72343  
46.4709813.6175871.2690324.1384 20.6988720.50099118.846 147.075464.35918  
398.755539.0313536.1020482.5408922.6914971.2234271.1806695.8903610.55772  
62.2085434.1038161.3385633.1009215.6509870.9930683.0844875.980232.162995  
101.695366.6889615.280897.5135441.9329064.021026302.48455.349843123.9117  
25.53913287.215124.2862 268.76343.78722941.6812540.5526531.0211455.80002  
22.3087934.937858.27435217.7470135.366413.17645644.9286233.5654130.48049  
23.1912917.6655136.0087132.085068.18411581.1274 34.4855362.8252773.685  
16.3516372.7186 24.3853749.5769 47.5246648.5861619.5146125.6041620.39433  
72.15962220.944518.1296 2.241122115.291822.9722413.9783228.06414494.0188  
39.1704915.4080841.4117614.8460943.7876224.4480892.7995527.2918787.1029  
28.4640110.8503232.81354321.8808113.845635.8462713.9052 95.0713 577.6567  
29.3631762.9764332.4145928.0615 98.613217.610558340.042722.47319167.3098  
144.941 51.66026153.6243105.375973.961795.062783131.871 63.4122116.34431  
57.7959611.286754.05183737.9338228.9309560.55021406.261448.4304966.61351  
28.3308747.7210473.6422624.8590839.2660846.71356177.625333.5907516.23397  
10.8068419.6228432.4455726.0849146.8158529.4501752.51749400.5793162.097  
47.1230929.8950571.4564585.0899258.2746318.7575633.39351110.954749.5251  
4.232031355.747 36.5645215.7315718.9318 91.0986718.99606278.73365.608757  
79.3591920.2263718.5689760.0265429.7376 54.88895153.937216.9095245.31071  
100.282952.6669434.4221949.8948925.9981944.7136846.480669.08817632.76415  
NOX1 1.1826460.1083165 0.6028031 0.1001096 0.4946174 0.508768  
0.3350285 4.0141780.05173614 0.1068174 0.5898179 0.5486238  
0.6600774 0.3776912 0.2149196 0.1795242 0.43248 3.0043350.5396019  
1.0326221.0315941.0049421.0073130.4078824 2.0589672.0684462.468425  
28.646630.1769521 0.4710989 0.3473547 3.78174 0.5289884 0.7322575  
0.9674106 0.5862581 0.7889227 3.4719052.9907570.2625421 0.3781263  
0.3459742 0.2794445 1.0869360.5242129 1.6647780.5585822 0.446117  
0.5570779 0.7167137 0.2539621.4191321.0448950.4428496 0.4156699  
0.5042484 0.5161970.2234031 0.7984160.5222188 0.3614054 0.5045099  
0.4964164 6.3106690.6044163 0.4277187 0.3727784 0.4831373  
0.3692910.3432043 0.6660840.1448319 0.8274896 0.1966292 0.4833715  
2.2175620.2496839 0.6510594 0.5107401 0.8699149 1.55579 0.6957181  
0.1581828 0.2287149 0.5458045 0.3722306 0.3319361 0.3824054  
7.1141681.0549041.7041630.4520419 0.5716490.2474056 8.1002090.8296599  
0.6396192 0.4514314 0.2931289 0.7544482 0.3431063 0.4522236  
2.2847780.5027671 1.0859413.1560020.4384139 1.0633410.6996181 3.20385  
0.9038919 0.8255032 4.0992990.4630406 1.1457730.4604329 0.3723365  
0.5851723 0.4575693 0.7503760.6608623 0.2491297 1.1229290.5512387  
2.9326914.6586212.5232710.7268860.4384972 0.7530467 0.3955155  
0.2626401 0.8070213 7.4952360.2317109 0.08162951 1.03165 0.4798533



0.2466085 1.4770623.6351420.5748235 0.2468515 1.8370120.3977967  
0.5548725 0.2141915 0.5811864 0.7583147 0.4930249 0.8533161  
0.5216503 0.5708615 0.1777054 0.3055731.1152 0.4681485 0.550791  
0.2194517 0.6066461 0.4291303 5.9035720.3393674 0.2963766  
0.4844155 0.9311362 1.1489740.7434398 1.2560710.4776228 0.7844565  
0.4521997 0.1728719 0.1834025 0.4685595 0.1313257 0.8774709  
0.1746399 1.4386610.6674446 1.9537848.48962 0.2755307 0.4131528  
0.5675307 0.4038267 0.5812117 0.7206481 0.3299166 0.5194882  
0.4162127 4.7799851.7001440.8240576 0.9270950.5196509 0.5863247  
0.1991843 0.07515341 0.4796695 0.2698177 0.4929489 0.7262315  
0.5896697 0.6655082 0.1367941 2.7080210.3680847 0.6185982  
1.2781050.8575373 0.5950372 0.2238207 1.10852311.1932 0.3042192  
37.817180.6421795 0.7035506 0.3035528 1.0678420.1544942 0.7859038  
1.3315610.4726704 0.2383690.2310337 1.5929740.2665872 0.6757916  
0.2053260.8517372 1.1640041.70183 0.7228545 0.4122980.3935357  
0.7495721 0.6775280.4637254 3.5027240.1455055 22.821675.908537  
2.9559360.5281627 0.8347667 14.757920.3269787 0.2859429 0.8119118  
0.6133511 4.2871430.4380423 0.7720831 0.3794744 0.5267001  
0.6150524 0.8458351 0.4143219 0.3082741.3046630.8188207 6.101626  
1.1803180.2672809 3.3530310.8012978 0.3969745 1.4286670.5547878  
0.6809879 1.07515 0.4342602 0.5189451 0.2741960.4174605 0.8483962  
1.5119440.7336394 0.4612530.7973656 0.6208503 0.4841169 3.668004  
2.2468321.9129570.6668183 0.4409116 0.4109412 0.3508861 0.2981822  
0.2528415 0.5058823 2.1498430.4962233 0.6786369 0.2771651.236355  
0.5121149 0.6171531 0.4063318 0.4891199 1.4507350.4134824  
1.8083091.5118490.6398873.3941320.8201475 0.1909828 7.78999 0.7510419  
0.4915980.9116574 0.5449711 0.4770570.4514597 0.5268505 2.6328  
0.7230017 0.4217942 0.1391358 0.3387354 0.5270425 0.2504818  
1.3019010.7725511 0.2330112 0.9839314 0.4592841 0.1914352  
0.7881766 4.6249891.13307 0.7983244 0.2590807 0.6907319 0.2579828  
0.1526034 0.8652668 1.0807810.4770660.8641339 0.6101498 0.4261274  
0.2296538 1.6214460.3411419 1.0025751.4558850.3853464 0.6173321  
1.4460490.7297456 2.3977620.8930882 0.3453187 0.4310985 0.9309874  
0.9241619 0.5587273 2.1985760.4460141 0.7853144 0.7277366  
0.4979551 1.03367 0.4297212 0.7622948 0.1430076 5.9349710.4221709  
0.4333611.7757280.5029706 0.1559015 2.9366380.3330709 0.4422623  
2.0012910.4677443 0.3189970.33465 0.1682733 1.0527360.2867757  
0.4482733 9.4006291.2790190.4000411 0.2115468 0.2177110.2231812  
1.1259361.9960220.9385237 0.7343748 0.9508621 0.5055628 1.865996  
0.4348880.3262682 0.2731937 0.5258166 0.1542007 0.3388431  
0.5821663 0.4087496 1.4023180 2.8101560.9729095 0.6177983  
2.3235570.9003299 0.6554539 0.2080770.2881747 0.5155368 0.3031391  
0.6046376 0.3817221 0.5624146 0.5960977 0.3678123 5.039383  
0.6039214 0.5125409 1.909134

ABCC1 8.2466769.36211910.229979.3834359.9554968.8053188.22599410.39636  
10.522537.69624427.3455114.1669312.4203810.3006812.897669.1323856.227132  
10.199369.06404512.928226.3570533.52456415.0598163.9113110.584516.716024  
9.24951615.998936.7184226.36177513.079754.6651495.06431527.267699.953089  
4.7208973.9881095.23177115.0682512.176986.8170565.92168 5.5371028.332311  
16.8774810.3100514.1314521.9378114.998944.98665812.8686515.5987413.41678  
13.882379.54471318.5002710.7346311.371298.9014338.74596414.2792715.45047  
18.288148.55606412.237864.2696833.2325896.2200279.64831710.7531412.77181  
3.66107311.5479562.7879712.953849.2544818.99690410.7277313.118765.11233  
9.0838466.81819329.089615.4281358.40124214.508468.6803129.8674485.794511  
12.798166.29253711.2084215.150515.3074367.55160413.1475410.316123.436969  
5.72099220.2170811.189727.1277167.58165211.653099.3107365.99465 9.871329  
5.3251278.9782223.69005 7.5127849.4701128.77748820.687858.5557834.882172  
3.61132910.880836.5048217.3820356.80295513.946639.28791 10.2168611.8963  
9.3590266.4979057.21651213.643416.5540177.67695913.249263.6615987.512144  
18.071147.3106015.2063588.2591574.41364 5.0646186.7374065.11763613.81936  
4.0416129.0369136.60398484.064812.5310256.85601411.682639.7925687.291058  
11.2097910.501236.2985655.87715 8.6211278.6733768.61726 7.2942647.141029  
16.4781519.4282610.5634416.1592812.0908810.685946.5934685.44870614.34341  
35.315174.44955712.772839.9626468.1541185.85830918.030756.75549 3.570264  
7.93439214.283148.59197615.6406211.6335610.4894217.225733.05619510.1238  
6.59941113.448917.5573859.0658 74.088364.6043241.0309057.6836678.459424  
7.048994107.461711.192777.52463715.8999315.2026863.734956.0731247.867125  
6.5088127.4102247.1057237.01356 15.6366137.3452711.3298213.902044.168489  
21.676377.6323275.44037311.739815.54962813.0620619.9586114.3698410.78328  
6.9770569.95052 7.9254418.80991914.285018.9377477.20664 13.6606711.11811  
13.463898.0122639.6011148.29418619.6468630.7775860.5954410.665998.289287  
8.1293719.8226289.6006185.19944425.418758.09466315.4885614.134839.38031  
17.5082 6.1428135.8997547.6415953.61226316.079756.88014512.7730671.39374  
7.4851495.3224197.2874747.3805116.56971813.278894.415049172.633818.08807  
6.5706 10.176 15.9243615.269667.4833399.9835482.14944 13.5126412.03643  
8.7476686.30438514.805488.8071 16.0930658.378643.88440110.071018.087677  
130.849910.426384.99022 6.6627556.9287866.29728621.9619210.5859420.20383  
4.11266211.2674611.001779.6478979.08273811.932736.20278211.1047414.80254  
5.3475484.2711923.6110966.6800344.8255038.31453411.2668 10.7332314.01515  
11.578647.8743325.8793726.3528978.4605516.92734710.8565913.0188815.5049  
13.359928.42492410.4471612.908426.28305210.443777.23274232.052689.615975  
8.9998729.8891185.82235 6.4962177.53966 23.049486.21144353.071249.467229  
6.6321327.40011122.823059.78094912.845469.1719535.91535 44.006526.453222  
8.0000915.8222649.1531039.9740287.62761439.7988 12.876137.5706168.427256  
14.8683 17.239346.0529022.38301512.8216712.6164 8.88752214.833029.005846  
5.86376613.684547.61687117.7507 6.19209321.368236.48102810.6319815.43268  
6.08296 11.4939915.4370214.5732810.5702 5.7750916.5476078.84712 14.41019  
8.7724828.5690617.71620311.367774.4037134.63423756.6867317.9956116.6198

10.800196.3578893.6419354.35666813.079145.25202517.926985.4506076.239513  
13.9635313.730166.62683813.833866.9166576.947286139.651416.007347.180568  
10.4733713.9562 7.0047816.9681018.6093515.5270355.7915323.05426511.00014  
12.215345.9787217.8486154.7123866.22588814.963536.8858996.753258  
SLC1A5 87.0214522.96472108.203224.8656338.19862109.730630.1948639.21068  
12.8013443.6800182.8788 51.4225469.3457875.2346922.57646121.600996.96061  
141.3274207.730768.13146145.370980.8751181.4716398.3897391.08072101.4607  
44.7296871.7049 85.99398102.861860.0041498.4161563.4167992.8981874.3484  
59.1135680.2446 51.9559430.3927270.4804294.1799 56.5922873.92725107.8177  
95.6640698.88803721.908 32.99982133.707948.5999191.21187171.9146128.0268  
90.9599944.84234104.2488127.492961.6158 72.6771343.58584102.2912129.8569  
68.4293874.26143148.5164116.034550.73563127.1706117.058346.30102109.9183  
101.761977.20316121.975737.3971 90.82824151.304289.25986120.228976.92129  
82.5576984.95046117.172846.46698118.920753.1567553.8588340.70157332.4062  
20.9489 68.46526194.2196230.4175122.469622.2797173.4594960.9136681.85324  
59.8023687.9939872.4010474.1120187.6153250.8500895.53013141.219174.28816  
31.6962273.2857280.8234157.99576121.958 89.2811842.87239312.013587.98961  
135.6648121.918658.2394383.91954102.472162.90632117.8796532.41049.463191  
90.92341158.154590.3133374.5888873.64465126.253839.03171295.8408106.3723  
41.55794130.218380.3680264.63893112.2258113.372 44.4757288.2766459.33387  
80.124 57.84292104.337731.2646635.10168109.595275.8519 102.414 91.76955  
27.427 132.4116109.068157.4390335.4142 135.9684414.925284.0924473.94928  
42.7688271.07883152.492479.50164105.416450.1910365.9699428.38391133.5454  
124.9437433.544649.9760287.0347364.6906166.11629123.0035114.766275.00406  
62.9541299.7563967.6381382.1423985.53516142.287950.59639129.0989124.6889  
35.4726856.8811180.0680597.47039144.186978.5566735.76225145.221344.02343  
49.09278189.642995.1345365.5272314.8135759.40647101.329845.1372856.18589  
84.8896171.22035163.713162.5911556.28276115.427887.9336789.6827330.11585  
79.408446.76613754.4552674.23611125.331748.7371837.0238344.9498893.94715  
83.5754668.2765752.4838885.31848122.5172121.9059125.313 64.8421385.57163  
104.8073110.651624.8603391.74149176.954769.45578172.5152101.428444.12548  
142.934769.92379216.958 82.84077214.166163.5584929.7897756.9391786.74445  
65.2681 218.168871.9039698.5007350.3688134.65411106.1361100.894585.00136  
70.3751378.1074645.8501385.9577290.4482750.8203820.2395948.78382177.7766  
72.38681270.362787.8198263.5131469.6100664.25401243.878331.54961107.3674  
98.9055 107.260913.16063128.9227106.4535140.419338.8567118.1712345.49183  
94.4517892.7702248.3637640.135 58.0029335.2022548.111 107.143 35.46649  
84.9849 46.87522110.266861.3447223.3159287.7359557.7632148.38746106.0957  
49.02826118.315997.1509789.1737152.4970736.9832653.7762544.2813 16.25313  
70.7904651.4195862.33086152.789790.36177105.980867.8889579.0033650.92897  
80.1315886.9339 38.6771335.8063646.2938433.9453635.5559750.8362678.36514  
118.473421.42209115.857584.67685126.482697.4556 44.8241451.54281109.5326  
59.3068447.7199252.38698144.755735.21883109.155 55.39567144.522936.19025  
25.2767 128.867731.30924153.899255.9323689.7161684.06023178.632348.85126

60.9534770.7247246.8114789.32326103.883 128.0329296.854642.9641167.7336  
170.372636.4375245.5483629.0734384.9843467.93034101.587657.6523 80.65791  
2.51363556.8421549.7779 49.7191790.1971873.7294126.6125534.4122145.0834  
31.7789150.06778121.425483.3006475.8659866.5540976.13 104.788 49.32393  
72.4134253.74951111.9431101.437946.83613122.423528.7882984.7019759.87847  
67.54157122.434464.72893111.668181.3325148.4178743.61964109.3943100.0043  
126.560464.89674133.92 77.1172688.2563266.0724129.43696207.699843.17293  
64.2400451.3219852.9025377.14089163.2296137.2844128.499287.71619

GOT1 34.542369.9949669.27825711.6326831.1883311.0711 13.0528514.14548  
13.893738.00276938.5939616.6929315.5354 12.9861912.0186915.7825418.50936  
17.7972321.8339617.2553912.1373215.4093819.6860222.5874318.7030428.99526  
18.5709913.931 27.9797524.7362813.6324520.0882117.9762523.9567 24.40896  
11.3754110.5173413.0451637.6800818.3522825.3292818.0560518.877819.107312  
14.4933819.2704422.8970521.2842525.6169320.0848230.9322714.2935333.23889  
13.0747133.7688510.9022217.9184320.5488614.8825111.8081616.3667815.00582  
20.9359 8.63427 17.8507716.4776411.6268413.6581 24.783857.58375720.62272  
15.7365715.3898621.2019 14.5286523.6094425.7801417.5771910.8463619.54824  
21.8103315.6058718.6974773.9054315.1971211.3202420.5878 11.0560711.75124  
23.2348619.0183320.14693146.911330.0355612.7330821.237 17.1078 33.27618  
11.7488310.8479 27.959238.95682712.2863219.7193520.8663 14.9290810.58757  
7.64478412.6219324.0696318.3784221.4881114.3607431.2729617.8245519.69547  
22.5409212.8294 9.47849723.4864 25.0226927.913699.39146124.2827 12.23337  
22.6412921.5579318.5003 9.91231621.9446811.2909 16.6670715.7281712.09961  
14.3195310.7947211.3093521.5197710.9991823.7265114.3645710.8949713.70253  
10.8459321.2678832.886899.76283 6.36679721.9615817.4503818.5892822.97827  
17.6989318.5839313.1820813.8947718.2191114.8973519.9369217.9080336.57249  
15.5285117.9829237.0054714.1511716.1946118.2594318.0399611.4418520.67994  
17.4520618.2281610.8008 24.0646916.1322537.7632430.1633816.2245 16.49862  
12.7143715.7734516.5589320.2313811.6383311.8107126.7478613.0373412.05912  
8.73701318.6162 25.8966 12.2872120.0803116.1870819.3528824.5327712.88489  
12.8465837.0802422.0581818.940037.10498624.4904825.4331417.3049919.283  
8.10845122.3888919.7643912.4214611.3857634.6430726.8543324.203257.449342  
34.9136712.6006617.0290817.3431716.5318314.9262317.7135421.4917116.12387  
24.2585316.2766210.5937714.2154817.2443623.2795118.6924312.4690611.54282  
15.7034116.1240816.8423222.3241 28.5010636.1133314.0824 9.9493245.975728  
12.5514412.1721334.3872425.7946818.0930614.2864925.5105114.1271212.68393  
24.0289816.6921 11.8824414.4561814.9577514.4444 15.1277611.4829231.28236  
17.9599719.3840323.1350816.0635612.7562817.3723 23.0638421.9329 13.41551  
9.59733530.8440613.580659.7690689.35765916.8469229.6257519.7964926.66138  
12.1774724.733 21.6162 14.7267 33.6394841.2129828.4978115.0786411.66787  
22.1480112.3126216.0904316.7301 24.5767811.0265822.9767 10.8247614.50227  
11.5434711.6348820.5454215.6377612.5032217.4709217.1351513.0049231.55461  
10.0421814.1161816.1625 10.8270816.8778518.2783725.4740322.4951213.21919  
24.3005 15.2583812.6847953.2247529.1169118.3270114.2619122.1022617.83609

20.42972 19.05857 50.08648 11.10983 24.34973 12.4591 10.91961 83.32026 10.36768  
16.76467 21.64047 17.05124 11.41636 23.65154 18.18535 12.30948 16.94742 23.4178  
11.76987 22.61805 26.30932 32.8803 13.25674 17.3861 7.99704 26.83025 54.64596  
13.20091 30.19963 6.4077 15.04407 10.32711 22.96872 16.34691 12.0178 9.492209  
21.7681 28.91473 11.11303 16.27969 23.03403 19.53287 13.1495 15.30237 20.7255  
17.28965 21.28153 16.63107 9.05735 63.15786 13.91923 17.51022 16.94773 13.45598  
12.38956 19.76529 27.59587 8.85663 514.60967 17.89686 21.32425 25.92216 47.01277  
12.15491 12.14798 22.84077 19.99372 25.3668 16.95225 18.6256 24.01003 19.78504  
39.49537 28.95695 14.70119 15.11572 12.13163 27.47562 10.7026 11.82239 8.647995  
19.9246 13.73112 12.14995 23.96502 18.3488 7.58042 815.63488 18.05955 8.420735  
14.86963 14.58288 18.79848 8.75737 415.81765 27.04335 18.04766 23.41528 18.11514  
44.87362 13.70924 8.76516 811.86183 15.39657 18.29936 12.10102 10.58245

G6PD 13.16576 19.4734 13.10659 11.84315 17.57111 10.90896 14.64632 15.55192  
10.60413 12.86387 147.5965 19.16659 11.76282 24.45396 17.66588 12.7628 9.467807  
18.88168 13.70208 12.35654 11.89844 16.58382 119.9878 141.783 24.02378 16.8574  
28.1984 19.91877 14.89427 29.22005 20.16211 13.04022 20.04425 28.36512 19.29765  
8.54233 314.92079 10.59703 28.98225 19.67795 34.38358 8.39294 76.00203 23.90009  
22.38644 17.20459 32.15863 20.28548 28.46397 4.63282 612.98181 29.95292 47.82792  
26.46646 10.14667 17.47685 19.85358 17.57542 15.39334 18.34123 19.8219 82.45566  
37.4155 30.41772 20.60621 39.02172 17.92643 17.73956 11.70591 29.44396 30.85306  
10.84887 29.46742 282.17593 1.15915 14.96935 44.00916 16.12483 35.59459 15.10266  
35.25102 37.93054 108.9046 10.40121 21.29063 30.13488 22.77761 28.17049 17.47409  
22.62152 17.66824 11.18734 24.26618 23.24757 24.92521 151.4243 13.89264 17.3177  
12.70016 25.26 25.06125 3.73999 836.85786 49.76035 32.34377 11.13052 21.46175  
6.56494 629.49596 73.73113 32.34263 44.09806 12.01659 20.04264 33.24572 17.59995  
10.41557 29.44307 17.81899 12.40916 40.10449 69.2525 11.49129 15.42185 8.197561  
14.32493 15.70871 14.51024 21.22009 25.42258 17.93865 20.71089 25.01534 32.75144  
23.09861 15.86295 15.90377 48.00637 51.50833 16.43184 12.35558 16.43271 20.94398  
25.09193 35.05019 15.04918 90.23914 11.4806 18.91134 12.81654 21.09367 35.82821  
24.29536 22.78696 28.48142 23.33373 33.55752 32.33795 16.78205 18.24295 19.4037  
13.52691 45.93886 25.79052 19.8043 18.76332 19.10318 31.06508 6.24328 633.19114  
289.2443 21.53858 34.7999 37.90604 21.64542 13.34221 48.17043 26.54922 9.869153  
22.73968 12.04792 20.27857 50.80667 30.96415 25.2926 25.91647 14.2086 28.42331  
12.75066 6.73779 647.41984 16.12985 180.7822 22.26238 28.81864 24.21686 10.53114  
23.38484 193.9435 35.31799 29.52248 10.17073 20.77379 253.1838 11.63539 15.15525  
10.62851 41.24863 20.96025 10.15673 15.71124 275.7129 16.21058 29.93174 11.71345  
68.36602 18.97992 16.48715 19.89425 30.48801 17.09751 17.87498 19.98209 28.69632  
17.3558 13.89378 16.03671 44.00519 144.4612 17.19481 23.24494 18.98997 28.50451  
31.74933 24.7821 18.41385 18.8522 24.89785 12.06985 537.6305 22.79045 13.30365  
22.29764 9.84327 469.94901 23.7394 37.83438 10.64906 11.90337 32.16219 25.72083  
12.29556 11.41679 12.81416 22.15613 15.65101 24.22609 31.80513 9.06602 2185.9256  
22.52942 14.70917 17.75046 11.23703 14.99642 16.02221 15.12048 65.60283 23.13717  
24.52258 21.80296 25.27723 14.99938 23.85903 29.73839 21.21269 14.71357 77.76466  
16.68175 33.82898 15.64194 40.54356 17.3283 246.8427 35.39332 25.4542 21.46549

135.630841.1553911.4058825.5433 36.637737.28682539.8518837.4897418.89134  
36.9359312.0061917.0581124.705067.30833542.6618115.3466223.0608524.69868  
13.0323923.6837322.4699715.8240610.1470410.1573621.4596323.5922416.78387  
32.4795515.9175114.0987210.0339514.8210330.6913622.1459912.6652915.52576  
18.3842 30.9486512.7636 20.4172716.8565711.4592119.37294227.411 13.01751  
17.669928.84048424.5549 19.20437204.368333.1022621.5954940.207 130.6616  
11.6265319.7926375.4729518.3622110.5181716.8432816.30244434.613921.81521  
11.7973319.492416.15206847.6914215.85453341.764324.1713 78.8053 116.7495  
20.4874618.4480221.7153510.6811619.2113936.2406458.2148814.4353 22.12932  
37.7829412.5462815.3123827.4227836.4947 292.837 11.6082941.2051619.12474  
25.6726110.1647218.0351613.4696816.8088110.005457.64627511.3141620.4235  
19.9042819.9147516.0131113.5299630.8987815.13455266.1554186.086727.80736  
17.1767210.2273629.1731517.1300920.2523315.2127475.3245718.2594616.54068  
382.597 19.1359432.0722515.3001 81.9034721.35677235.710914.4560937.21619  
27.3168226.4120420.4061614.2880418.0674710.6468446.2013 13.5386416.26948  
48.0084824.6476412.4560713.4623 29.9123622.5070912.7300812.62346  
PGD99.7516 10.7442638.2950115.75956234.124922.6122417.6052223.9357118.73942  
13.86574755.142978.4443930.5699654.6973 13.6157829.2934834.5300571.68885  
46.3314 43.5788777.1719 42.1427995.55775353.1119124.193883.2034592.00552  
95.4775450.6623662.0678543.5883969.4146555.0104260.58354228.616837.33893  
50.4921928.3035162.7481552.5382550.2139927.4874 102.480953.2581343.67744  
120.912839.43119141.5042103.733952.4826144.8875 53.6734 78.8663873.65221  
55.9521353.0761947.7144219.1671885.2368921.2356672.9080798.8022274.48033  
46.6832137.5502 96.4996633.4583788.1242 27.3360647.5273896.8040244.38688  
74.75363404.400854.87196103.712345.50659188.165 98.6664651.08529104.1125  
112.2286154.719466.0513742.2533271.1421741.5370627.5899643.9649568.72201  
184.230443.98898102.5745122.667367.15095134.788 72.2578945.4539250.01931  
24.6816511.8510150.1832684.27099127.873553.3126882.0757437.4534214.77051  
84.4136 99.8919558.93286152.268 45.6954532.20014149.078279.53176110.1485  
108.8623105.121 106.7473119.4253112.819820.3078566.9091762.1532179.5981  
55.4975135.3279873.8537846.1818641.1027750.852 163.414266.4037860.05513  
44.9806271.4174438.4415354.4309560.9862338.26092107.021 42.0819 125.1423  
29.3208198.29311148.65218.59207451.9945356.3104857.3003928.8361 66.70136  
153.911675.8882942.5542954.7754266.0839566.0959835.66846110.129957.49219  
133.047687.4579787.32426118.483896.6392168.1242345.7061165.53356469.5214  
88.8643463.4337 43.6393937.6251392.80276207.026237.3355779.7052960.4339  
115.6889158.626777.2364567.7202780.5811538.9702454.8998463.6256133.65519  
45.3252 79.0274175.48751371.651653.3363284.6408991.4634721.9276548.95171  
643.654490.7972777.2079361.2499 100.4852660.120336.0842956.4793556.01747  
156.604582.2674852.3827542.10858817.117352.4057 104.306824.15967136.6518  
57.9123930.8308423.7957135.0039634.5226 52.8798367.2717597.1596241.93214  
44.2801529.39151123.962374.1202649.3327627.0291734.1565850.5231557.08009  
74.7757935.3309257.65068100.627998.03408350.650772.2391336.99459137.769  
38.95818116.915491.59045130.185158.18954168.415842.28126128.601561.63344

68.3077447.3801950.2169158.25731118.959686.4831774.70709504.565 46.35789  
76.8593766.4590557.30191115.207666.59063142.36 184.377673.5764940.07539  
80.5398948.0127994.25939178.7303126.255968.1143967.4362157.61733109.4953  
101.491 47.0908980.3882579.12412276.963723.76371191.605140.04842573.5233  
39.7946361.6557172.9868741.4716628.2349486.3557558.5438652.1031679.86389  
41.2045752.5879445.3348416.7908483.8976790.4682965.0904831.8333549.08153  
66.6496721.5427348.6056135.4012942.9474 21.9342662.4465397.7708687.58537  
29.1451536.1792129.2802639.5896665.1090934.7712277.3154421.4937687.62577  
49.352 60.3328197.8653745.3269453.3890718.71703161.909547.0349228.55126  
26.5343745.7125384.77918142.228499.7236163.6857 81.2185889.0597231.16488  
56.58109171.1555174.86 26.1937543.2940143.23604342.9144185.736953.35534  
62.7035421.9053640.8811685.35684434.510350.4062 127.5629130.272120.98727  
191.556320.1617643.98257133.270183.9153987.7983 36.04282208.619873.4976  
36.7052519.8514 101.1843254.401 287.981133.7070751.4796476.0066448.22415  
26.7818254.9107657.2162 37.9572637.87779247.716135.9200393.5992928.80279  
28.7453898.8226327.2150471.4510682.62015484.3594363.9323159.639571.17944  
44.3990480.7569528.5901574.8258 172.056580.9899639.8998743.23726808.1785  
53.2039171.5226962.00545266.649823.46472269.574430.8973195.5422650.28497  
51.3023189.0507 22.4094640.9900764.6491943.6074645.7778861.2430167.11408  
49.9931325.9059346.6173974.8008957.3056662.2841465.46278

IREB2 3.9694982.9462365.1263633.1131713.7462383.5551014.2318423.663268  
3.3224772.9463334.1099164.93749 6.2405283.5789583.6165023.0980724.395366  
1.8802652.7752624.2504952.1496076.5711574.1255924.8490417.1648475.738176  
5.6565447.7256117.8340122.2507113.7948616.1564772.1641356.6529624.567466  
2.2102087.7901823.3572717.5933622.7366431.71545 3.6040933.7376253.395715  
4.34465 7.9825752.5423293.9479186.4893922.7341174.7606654.6649014.35288  
3.7329682.6806597.51831 4.1771256.0890263.5841543.1798999.8300277.626767  
9.5177934.0633291.9172673.9239931.1686085.9122636.8418532.6403415.959559  
3.4719176.6148515.78912 4.8669883.9632032.8674987.9233324.2318152.166427  
6.5540122.9104712.94858 3.1686062.9938654.7965592.38815 10.194043.173398  
6.6724578.8732632.7327735.3141373.0971395.0286943.1770364.7548362.305958  
4.8222132.98137 3.8571921.7736211.9040096.1545262.9281823.7128214.028752  
18.098964.4963092.7342776.28236 5.9063395.25271 8.8601515.4108495.616356  
0.8088414 6.7448755.1350424.0438393.5702074.4666175.3938927.982986  
4.5661985.1483494.2934225.2378433.3837551.7462614.7096493.6542376.221462  
2.0929916.1875114.2626463.9120933.1686794.8460353.9271242.1462593.821642  
5.7273355.70596 2.3978173.66096117.357051.1781642.3663123.9461986.472202  
1.8395562.4671935.16934 10.826794.0098724.1373413.7343474.9779432.620319  
3.24337 5.1198284.4770293.1307075.5599015.0028873.4068915.2071367.095748  
5.4735544.73072 2.9305654.72896 2.8127132.70038 4.5629683.3405284.15038  
4.5147712.5940817.8350624.1931444.1200224.0322993.4835047.6924272.224406  
3.6973353.8376292.7091033.1193025.0269724.6871774.5621295.3683624.651864  
2.3744535.7041554.91363 5.6751873.1474943.2025335.9898887.9484623.23887  
3.74692 4.5781326.54489 7.2989353.4208845.2483165.4233143.8993354.870304

2.18791 7.8524998.0748842.7762563.8258453.2153833.9865845.8346473.936108  
2.8728773.1586167.2350084.18775 6.2803723.3787213.7514442.6646615.337821  
5.54698 4.5183122.8015294.3997023.5057724.02926 6.6136234.5078196.352815  
2.4766277.3573585.8546352.6992093.8352332.8940985.5196616.1557225.138985  
2.0801875.8662723.0252742.3029032.2790983.4138054.1611465.5195382.566191  
7.9768887.1081612.7431512.9297572.43339 4.2848496.6799175.5533124.785402  
2.0984771.8492184.06244 4.4409495.8206455.0972764.0501662.6336154.743154  
4.8984373.0291158.0086155.6244214.8319386.4862695.7976415.6047792.636311  
3.1877245.6142063.58309 4.2694293.63382 2.04372 9.2942915.2685787.522826  
4.4545855.3093234.1323956.2675591.9647443.9720024.3963864.9133525.963503  
4.4635188.6450152.11849 2.2994952.82987612.824128.0633325.0408554.604232  
4.9896933.2374612.9209485.8248784.4578732.6245782.1120224.0255984.759311  
2.3799226.29181 2.4743464.0406233.3257472.2456013.6332713.4194974.294107  
5.1971313.9614752.5036512.08685 2.4712335.3408794.44855 6.27422 5.587381  
4.4731364.4254453.7531892.8975335.5517912.8685814.0209782.4401574.221367  
9.2975772.8871552.47904414.966473.5619 3.5266833.9855624.6936783.22884  
2.2482545.8321598.3208632.13579 1.9706455.9773377.4877 4.8676125.05241  
6.4604143.0119585.6043753.7407194.2801445.4140942.2143882.2837033.860568  
4.1561644.1086352.3928532.3038345.2002094.2025963.5136955.6183772.402309  
3.8379383.8032413.4836296.7033422.8969772.6682926.3524744.6803373.675682  
6.1458053.4840062.5978485.9080523.2150687.4810652.6658386.62167 0.7400922  
3.7083654.7361143.9480941.8155914.0946184.6698353.7863438.5467064.191961  
10.534673.7452163.8842672.1524452.5222722.7774454.9269212.6495071.469588  
5.8419312.5952392.02524 5.1821673.5354933.9463474.8883362.2035873.463517  
HMOX1 13.230414.5687048.9170985.52673953.344764.4137487.23729511.591258.10614  
29.9051511.3162414.989185.15267621.658715.26581611.008882.5545 16.87292  
19.695743.054736191.157 244.601714.1125632.7112817.6637432.7459124.40475  
12.47951332.393119.1237 29.6951966.650661.0186118.29992143.317859.716341  
26.9661687.7576 20.3787 9.5778046.3823477.13072251.5858 28.2909111.50416  
52.8668584.7453615.148629.53657921.2081912.6377811.8236269.5301310.26136  
5.94458 3.7362023.85488311.5683 36.8953243.2126419.0375919.21569261.9894  
19.0346826.9974615.5958331.555881.3153561.39979913.2329914.529124.677766  
32.8161759.6006626.0486358.848637.59541 13.092193.1704661.53634 3.403642  
3.67318614.491035.9917694.63939518.4552810.327088.9317463.60265217.33198  
107.728540.431438.5764854.51684815.30236113.657422.3302455.8296510.49309  
4.17647 5.570194120.488 14.8421 9.7314683.55890243.1595154.4340464.83329  
18.0946720.741913.31568325.9982 5.42308421.683119.51949713.9635318.9141  
17.7424 20.87619123.38879.77253515.6436338.0054711.5756448.756826.497079  
1.8927949.58471941.627611.19687726.8977745.639018.07896544.1818416.29258  
24.18493114.27 16.1547822.2647756.8813658.0862640.577242.808172358.3399  
6.60924814.9408527.506841.3930671.87896115.657041.75039155.5147315.02738  
7.0899838.9413031.90926919.7383213.031767.26026710.1598813.2103 17.49992  
7.56929445.982121.42205139.9053643.1504918.09422155.430254.1340313.04099  
14.8447126.3658215.7009625.22716255.627718.8985235.4099410.7001119.36811



5.61731736.3142247.8065821.6025614.0206416.0691445.4609 1.89943112.43032  
15.996297.96762552.5850923.5408227.878863.24703112.4316 2.20086832.22737  
2.90249315.5976322.0156211.3656325.8417912.2167519.8282711.7048914.56235  
7.7509356.30527 4.32524719.943539.35050111.2973210.41692104.77165.438376  
46.1337 1.33182240.8354518.916028.36086613.8774914.0033 7.5349117.952654  
12.6626125.5821884.0069120.000624.62536 13.901982.15383 11.7972110.6201  
3.92224224.9461313.587293.5157099.7850649.6307868.056851561.524228.44698  
7.16156742.4297639.0427220.7403315.7956285.1726121.7057747.6765 37.30105  
16.6339114.5490917.8790610.58916126.888521.8041215.456834.9828232.114462  
47.6654 5.64717212.0029325.0508918.87897118.67455.4720226.36145734.79883  
18.040964.863506293.37155.33929743.9012936.849 11.256828.38218337.35389  
15.1274396.8386914.0544710.7852632.0069 12.5086229.2620723.1139116.51812  
14.3039329.8931621.2162119.565918.32197623.4774 103.543910.498288.366002  
47.3872363.1839310.0876225.4291522.3994414.088064.6788719.18517711.87863  
1.63004714.6839663.97666196.35996.96209512.119343.97076339.1339233.54651  
32.2985713.8599854.5442130.5420319.5578610.4376310.922216.3867315.938956  
33.585528.65353623.4284225.8419128.8134122.2498214.2515468.4438611.75045  
59.1023739.0731121.0207268.631863.90971220.147377.50650214.9004 3.728863  
9.30006320.6354816.458249.80927715.2141616.885135.5973428.34886112.27717  
19.638774.66064527.5866 17.1838635.1663 37.4253668.2844242.023966.745632  
35.6219 1.02442 20.028732.56721424.1134929.889437.15097820.2830512.25862  
1.68612 4.66180859.1216 60.6313594.960193.99743732.1945446.4023915.92486  
7.66290915.287146.0486283.0971877.747681370.090425.3576122.3709219.68946  
59.926453.07246421.3446779.1321218.9770377.846415.3039556.97341 4.280587  
1.70466812.894784.35477543.1948812.9249630.9715812.6283631.9141237.36867  
50.3398340.0196432.0912426.321092.12780841.1554435.305027.62763813.42613  
11.3138159.141936.64602740.426172.87881151.86745252.52174.85874425.52926  
59.329414.57065154.6667121.380225.25284717.8058828.22203  
ACSF2 15.894560.9975879 10.545750.8079661 3.59276813.856353.979716  
5.2136041.1601191.0984332.2187277.65461515.630568.30449 1.45798119.73645  
17.9079513.0379918.8836 10.2425 13.8862854.4920333.438431.18999328.18894  
18.401296.12303819.5943718.415817.7885633.57562910.359169.0242637.892214  
24.590457.39483 13.2768315.2488819.472388.3699872.7493573.59895519.74341  
12.5126518.3948928.008116.8553055.7697637.12890617.1720310.7398215.58384  
27.172994.019866135.775410.0244817.771412.64990919.1793879.9701 15.47105  
20.9279213.8394410.910739.2126698.22891214.6665123.673049.73760414.91505  
14.2936813.0520915.284464.9710377.13423412.119315.07678254.9709816.52788  
10.5094914.0270618.109673.64935 0.7938955 1.09135 4.34573410.25658  
3.37185534.049211.35628717.0518917.5570626.200217.43131433.2714513.51687  
20.151793.5706355.92512924.113921.04253325.0300117.0054335.2798322.01061  
25.464823.4371 67.4753816.9171763.1215822.6878510.6648111.7003911.49901  
10.1109311.1682914.5483912.0765121.3302829.7198424.2118520.7356225.73103  
2.76920414.730648.00785525.7451516.026645.34574 7.60872219.435415.611526  
13.618124.7501975.16887619.8312717.657015.09825512.2724320.1500323.07665

15.93335 14.61177 16.89989 3.50170 9.19782 682.98434 332.39827 7.78003 29.764955  
13.39378 34.12857 4.23375 9.01123 315.11612 25.18229 8.01377 34.75479 30.83218 42  
31.13594 16.06356 9.14714 12.63121 8.08981 65.50781 812.10442 12.2001 32.79688  
49.77114 16.95766 7.68803 9.35105 3.40827 43.50637 336.67695 4.98882 415.93889  
2.50382 922.72683 12.77264 8.30710 714.1595 18.58274 79.87793 18.12697 11.1368  
19.29662 8.72126 14.94566 226.40755 13.16021 8.70065 27.23606 14.41733 0.86109 69  
17.07248 26.35933 5.68379 91.4277 7.23398 14.00216 437.65037 10.06433 7.92547 1  
6.84147 62.03788 619.52675 4.87362 43.40409 93.07855 239.23023 1.46248 411.2818  
32.5334 16.95963 2.83846 849.78633 17.31528 4.37527 22.63266 924.46591 9.63105 7  
5.95811 918.97388 8.14299 216.62779 8.29004 44.29557 2.16499 419.43232 5.77617 8  
16.65618 8.47798 28.64760 517.83004 4.93256 611.2475 9.57148 55.98639 97.99826 9  
31.64128 5.02055 247.84851 31.22196 20.15958 12.51098 12.18917 20.66991 14.64678  
3.86451 214.58764 24.57282 13.54634 19.50156 15.49414 21.21457 5.38665 815.34066  
21.26724 0.43422 06 52.97592 7.37489 112.98539 14.71092 14.94464 7.27410 4  
26.59782 5.92219 913.06787 8.96746 54.51426 9.31803 79.46031 319.46968 35.63261  
20.60348 5.70647 21.6216 12.47443 10.42553 8.44739 830.77308 0.80533 39  
3.21744 410.70492 26.65756 6.40354 21.19676 68.02149 417.65002 6.63782 98.71197 9  
5.42699 4.69347 47.27658 42.14678 416.76188 8.96912 624.42169 2.68896 343.70743  
3.08170 817.79085 47.72191 2.26234 16.44193 15.07803 14.0389 18.45723 55.19418  
6.61546 260.28466 15.41319 38.82575 11.52559 10.34404 10.75688 5.95052 16.73770 8  
9.42504 94.25201 43.83895 0.96855 16 13.81428 7.58761 288.35034 22.55795  
7.05410 57.94167 822.46535 0.93731 16 23.5362 8.76817 618.14811 8.69346 6  
27.99219 16.19577 5.86680 62.22469 10.51533 82 6.79466 68.73251 916.20172  
4.40732 335.23309 7.04739 14.93429 927.8276 13.96372 1.57908 218.72909 4.46081 3  
7.24394 726.87615 10.47319 6.32807 317.66955 61.33557 12.72989 18.95008 12.41964  
9.11564 28.49248 40.80135 49 33.99976 19.27901 11.89543 12.17273 8.00353 6  
3.47848 92.38324 6.64125 37.64487 84.27181 310.30399 7.23293 11.28717 96.31914  
2.56266 23.89617 218.77708 16.55103 20.94219 11.38206 1.11393 10.48113 67  
1.73067 217.1344 23.7828 7.72667 75.60409 426.5971 4.66073 61.78039 6.48230 4  
21.81251 2.85119 526.71155 23.39385 14.44397 14.62122 11.68479 11.35418 5.94292 3  
10.46923 2.95658 87.24725 24.43789 530.71348 23.06681 3.80836 29.32735 12.0727 3  
8.01449 96.01594 118.8086 23.271 4.46679 118.09694 22.4817 21.70748 10.0354 2  
3.15158 315.85912 19.68823 19.2984 21.27385 19.71861 18.7121 10.28917
