# Supplementary material for: Ferroptosis‐Related Long Noncoding RNAs Have Excellent Predictive Ability for Multiomic Characteristics of Bladder Cancer
Source: Hindawi journal article supplement (doi:10.1155/2022/9316847), 2022-01-01
Supplement: f1 [file 9316847.f1.zip]

|              |   |
|--------------|---|
| TCGA-CF-A47X | 1 |
| TCGA-ZF-AA51 | 1 |
| TCGA-BL-A0C8 | 2 |
| TCGA-BT-A42C | 1 |
| TCGA-G2-A3IB | 1 |
| TCGA-2F-A9KP | 1 |
| TCGA-DK-A3IT | 1 |
| TCGA-FD-A43P | 1 |
| TCGA-DK-A3IV | 1 |
| TCGA-2F-A9KW | 2 |
| TCGA-GU-A762 | 1 |
| TCGA-XF-AAME | 1 |
| TCGA-XF-AAN0 | 1 |
| TCGA-CF-A47W | 1 |
| TCGA-GC-A3I6 | 1 |
| TCGA-FD-A6TA | 1 |
| TCGA-DK-A1A7 | 1 |
| TCGA-FD-A3SR | 2 |
| TCGA-GU-AATP | 2 |
| TCGA-DK-AA6X | 2 |
| TCGA-XF-A9T3 | 1 |
| TCGA-PQ-A6FN | 1 |
| TCGA-DK-A3WW | 1 |
| TCGA-XF-AAMY | 2 |
| TCGA-K4-A3WS | 2 |
| TCGA-UY-A9PA | 1 |
| TCGA-G2-AA3F | 2 |
| TCGA-FJ-A871 | 1 |
| TCGA-ZF-A9RN | 1 |
| TCGA-GC-A3RB | 1 |
| TCGA-UY-A9PF | 2 |
| TCGA-YC-A89H | 1 |
| TCGA-XF-AAMQ | 1 |
| TCGA-CF-A1HR | 1 |
| TCGA-E7-A3X6 | 1 |
| TCGA-DK-A6AW | 1 |
| TCGA-GC-A3BM | 1 |
| TCGA-GV-A6ZA | 1 |
| TCGA-G2-A2EJ | 1 |
| TCGA-FD-A43N | 1 |
| TCGA-UY-A8OD | 1 |
| TCGA-2F-A9KT | 1 |
| TCGA-BT-A20Q | 1 |
| TCGA-CU-A0YR | 1 |

|              |   |
|--------------|---|
| TCGA-SY-A9G5 | 1 |
| TCGA-4Z-AA84 | 1 |
| TCGA-4Z-AA7Q | 1 |
| TCGA-FD-A5BT | 1 |
| TCGA-CF-A27C | 2 |
| TCGA-E7-A6MF | 1 |
| TCGA-FT-A61P | 1 |
| TCGA-DK-AA77 | 1 |
| TCGA-ZF-AA5N | 1 |
| TCGA-DK-AA6U | 1 |
| TCGA-BT-A20O | 1 |
| TCGA-GD-A3OS | 1 |
| TCGA-XF-A9SZ | 1 |
| TCGA-4Z-AA82 | 1 |
| TCGA-DK-AA76 | 1 |
| TCGA-DK-A3IL | 2 |
| TCGA-E7-A678 | 1 |
| TCGA-ZF-A9R1 | 1 |
| TCGA-XF-A9SH | 1 |
| TCGA-FD-A5BU | 1 |
| TCGA-C4-A0F7 | 1 |
| TCGA-C4-A0F0 | 1 |
| TCGA-FD-A3N5 | 1 |
| TCGA-ZF-AA5H | 1 |
| TCGA-DK-A3WX | 1 |
| TCGA-YF-AA3L | 1 |
| TCGA-BT-A2LA | 1 |
| TCGA-4Z-AA87 | 2 |
| TCGA-BT-A2LB | 1 |
| TCGA-XF-A8HB | 1 |
| TCGA-DK-A2I6 | 1 |
| TCGA-ZF-AA4X | 2 |
| TCGA-BT-A20P | 1 |
| TCGA-BT-A20W | 1 |
| TCGA-FD-A5BX | 1 |
| TCGA-BL-A13J | 2 |
| TCGA-CF-A8HX | 2 |
| TCGA-PQ-A6FI | 1 |
| TCGA-FJ-A3Z7 | 2 |
| TCGA-E7-A7PW | 2 |
| TCGA-4Z-AA7S | 1 |
| TCGA-CF-A3MH | 1 |
| TCGA-DK-A6B2 | 1 |
| TCGA-4Z-AA86 | 1 |

|              |   |
|--------------|---|
| TCGA-5N-A9KI | 1 |
| TCGA-GU-AATO | 1 |
| TCGA-FD-A6TG | 1 |
| TCGA-4Z-AA7O | 2 |
| TCGA-GV-A3QI | 1 |
| TCGA-DK-A6AV | 2 |
| TCGA-DK-A1A3 | 1 |
| TCGA-GD-A6C6 | 1 |
| TCGA-GC-A3RD | 1 |
| TCGA-BT-A20R | 1 |
| TCGA-XF-A9T0 | 1 |
| TCGA-YF-AA3M | 1 |
| TCGA-4Z-AA7Y | 1 |
| TCGA-FD-A62O | 1 |
| TCGA-BL-A3JM | 1 |
| TCGA-FJ-A3ZF | 1 |
| TCGA-CU-A0YO | 1 |
| TCGA-CF-A5UA | 1 |
| TCGA-K4-AAQO | 1 |
| TCGA-XF-AAMJ | 1 |
| TCGA-GU-A763 | 1 |
| TCGA-G2-A2EC | 1 |
| TCGA-FD-A3B7 | 1 |
| TCGA-FD-A5C0 | 1 |
| TCGA-FD-A5BS | 1 |
| TCGA-CU-A0YN | 1 |
| TCGA-FD-A5BZ | 1 |
| TCGA-UY-A9PE | 1 |
| TCGA-GV-A40E | 1 |
| TCGA-BT-A2LD | 1 |
| TCGA-UY-A9PD | 1 |
| TCGA-G2-AA3B | 1 |
| TCGA-K4-A54R | 1 |
| TCGA-DK-A1AA | 1 |
| TCGA-CU-A5W6 | 1 |
| TCGA-DK-AA6R | 1 |
| TCGA-BT-A3PH | 1 |
| TCGA-BL-A13I | 1 |
| TCGA-CF-A3MF | 2 |
| TCGA-CF-A47T | 1 |
| TCGA-YC-A8S6 | 1 |
| TCGA-DK-A3IS | 1 |
| TCGA-XF-A9SJ | 1 |
| TCGA-DK-AA6T | 1 |

|              |   |
|--------------|---|
| TCGA-BT-A20N | 1 |
| TCGA-C4-A0F6 | 1 |
| TCGA-CF-A7I0 | 2 |
| TCGA-FD-A3B6 | 1 |
| TCGA-GC-A3YS | 1 |
| TCGA-XF-A9T2 | 1 |
| TCGA-UY-A78O | 1 |
| TCGA-GC-A3OO | 1 |
| TCGA-E7-A6ME | 1 |
| TCGA-XF-AAN5 | 1 |
| TCGA-FD-A3SN | 1 |
| TCGA-ZF-A9R2 | 1 |
| TCGA-ZF-AA4T | 2 |
| TCGA-E7-A4IJ | 2 |
| TCGA-FD-A6TE | 1 |
| TCGA-H4-A2HO | 1 |
| TCGA-FD-A6TB | 1 |
| TCGA-XF-AAN3 | 1 |
| TCGA-XF-AAMH | 1 |
| TCGA-FD-A3B8 | 1 |
| TCGA-XF-A9SY | 1 |
| TCGA-CF-A9FF | 2 |
| TCGA-XF-A9ST | 1 |
| TCGA-DK-A6B5 | 1 |
| TCGA-GC-A3RC | 1 |
| TCGA-GV-A3QK | 2 |
| TCGA-GU-A764 | 1 |
| TCGA-GU-A42R | 2 |
| TCGA-DK-A6B6 | 2 |
| TCGA-R3-A69X | 1 |
| TCGA-5N-A9KM | 1 |
| TCGA-FD-A6TF | 1 |
| TCGA-XF-AAMR | 1 |
| TCGA-XF-A8HF | 1 |
| TCGA-ZF-AA4U | 1 |
| TCGA-DK-A3IQ | 1 |
| TCGA-E7-A4XJ | 1 |
| TCGA-XF-A9T6 | 1 |
| TCGA-4Z-AA7M | 2 |
| TCGA-ZF-AA56 | 1 |
| TCGA-XF-A8HH | 2 |
| TCGA-C4-A0EZ | 1 |
| TCGA-FD-A62P | 1 |
| TCGA-CF-A47V | 2 |

|              |   |
|--------------|---|
| TCGA-XF-A9SI | 1 |
| TCGA-GU-A42Q | 1 |
| TCGA-BT-A42F | 1 |
| TCGA-ZF-A9RF | 1 |
| TCGA-KQ-A41N | 1 |
| TCGA-GD-A3OQ | 1 |
| TCGA-BT-A20U | 1 |
| TCGA-XF-A9SW | 1 |
| TCGA-FD-A3B3 | 1 |
| TCGA-ZF-A9RC | 2 |
| TCGA-E7-A6MD | 1 |
| TCGA-E5-A4TZ | 1 |
| TCGA-ZF-A9R4 | 1 |
| TCGA-GV-A3QH | 1 |
| TCGA-BT-A0YX | 1 |
| TCGA-FT-A3EE | 1 |
| TCGA-ZF-A9RL | 1 |
| TCGA-ZF-A9R9 | 1 |
| TCGA-ZF-A9RE | 1 |
| TCGA-DK-A6B1 | 1 |
| TCGA-CF-A5U8 | 2 |
| TCGA-XF-AAMW | 1 |
| TCGA-BT-A3PJ | 1 |
| TCGA-ZF-A9R7 | 1 |
| TCGA-FD-A3SO | 1 |
| TCGA-E7-A97P | 1 |
| TCGA-GU-A767 | 1 |
| TCGA-4Z-AA81 | 1 |
| TCGA-2F-A9KQ | 2 |
| TCGA-SY-A9G0 | 1 |
| TCGA-GV-A40G | 2 |
| TCGA-FD-A43Y | 1 |
| TCGA-S5-AA26 | 2 |
| TCGA-BT-A42E | 1 |
| TCGA-FD-A43X | 1 |
| TCGA-ZF-AA4R | 1 |
| TCGA-BT-A20T | 1 |
| TCGA-E7-A7DU | 1 |
| TCGA-DK-A3WY | 1 |
| TCGA-G2-A2EF | 1 |
| TCGA-BT-A20V | 1 |
| TCGA-K4-A3WV | 1 |
| TCGA-GU-AATQ | 1 |
| TCGA-G2-A3VY | 1 |

|              |   |
|--------------|---|
| TCGA-XF-AAN8 | 1 |
| TCGA-CU-A3QU | 1 |
| TCGA-GD-A3OP | 1 |
| TCGA-KQ-A41P | 1 |
| TCGA-UY-A9PH | 1 |
| TCGA-FD-A5BY | 1 |
| TCGA-K4-A3WU | 1 |
| TCGA-FD-A3SJ | 1 |
| TCGA-FD-A3B5 | 1 |
| TCGA-GC-A6I3 | 1 |
| TCGA-4Z-AA80 | 1 |
| TCGA-G2-A3IE | 2 |
| TCGA-ZF-A9R0 | 2 |
| TCGA-FD-A43S | 1 |
| TCGA-XF-A8HG | 2 |
| TCGA-K4-A83P | 1 |
| TCGA-GD-A2C5 | 2 |
| TCGA-XF-AAMX | 1 |
| TCGA-DK-A1AE | 1 |
| TCGA-FJ-A3ZE | 2 |
| TCGA-DK-A2I1 | 1 |
| TCGA-DK-A6B0 | 1 |
| TCGA-FD-A5BR | 1 |
| TCGA-KQ-A41Q | 2 |
| TCGA-DK-A1AF | 1 |
| TCGA-LT-A5Z6 | 2 |
| TCGA-GC-A4ZW | 1 |
| TCGA-K4-A4AB | 1 |
| TCGA-DK-AA74 | 1 |
| TCGA-G2-A2EO | 1 |
| TCGA-DK-A1AG | 1 |
| TCGA-GV-A3JZ | 1 |
| TCGA-XF-A9SV | 1 |
| TCGA-UY-A78K | 1 |
| TCGA-FD-A6TH | 1 |
| TCGA-DK-AA6W | 1 |
| TCGA-CF-A3MG | 1 |
| TCGA-DK-A3X1 | 1 |
| TCGA-DK-A1A6 | 1 |
| TCGA-XF-AAMG | 1 |
| TCGA-E7-A541 | 1 |
| TCGA-XF-A8HE | 1 |
| TCGA-DK-AA6Q | 1 |
| TCGA-UY-A78N | 1 |

|              |   |
|--------------|---|
| TCGA-DK-AA75 | 1 |
| TCGA-ZF-AA5P | 1 |
| TCGA-GC-A3WC | 1 |
| TCGA-K4-A4AC | 1 |
| TCGA-FD-A3SL | 1 |
| TCGA-K4-A5RH | 1 |
| TCGA-FD-A5C1 | 1 |
| TCGA-XF-AAN7 | 1 |
| TCGA-2F-A9KO | 1 |
| TCGA-DK-A3IM | 1 |
| TCGA-FD-A3SS | 1 |
| TCGA-4Z-AA7N | 2 |
| TCGA-HQ-A2OE | 1 |
| TCGA-UY-A8OC | 1 |
| TCGA-GV-A3JV | 1 |
| TCGA-XF-A9T8 | 1 |
| TCGA-KQ-A41S | 1 |
| TCGA-CU-A3YL | 1 |
| TCGA-E7-A7XN | 1 |
| TCGA-DK-A2HX | 1 |
| TCGA-CF-A8HY | 1 |
| TCGA-4Z-AA7W | 1 |
| TCGA-FD-A43U | 1 |
| TCGA-BT-A0S7 | 1 |
| TCGA-ZF-A9R3 | 2 |
| TCGA-4Z-AA89 | 2 |
| TCGA-GU-A42P | 1 |
| TCGA-FD-A3NA | 1 |
| TCGA-XF-A9SL | 1 |
| TCGA-XF-AAN2 | 1 |
| TCGA-ZF-AA54 | 1 |
| TCGA-GU-A766 | 1 |
| TCGA-FD-A6TD | 1 |
| TCGA-FD-A3B4 | 1 |
| TCGA-DK-A1AB | 1 |
| TCGA-BT-A20X | 1 |
| TCGA-GV-A3JW | 1 |
| TCGA-UY-A9PB | 1 |
| TCGA-FD-A6TI | 1 |
| TCGA-XF-AAML | 1 |
| TCGA-ZF-AA58 | 1 |
| TCGA-FD-A3SP | 1 |
| TCGA-E7-A97Q | 1 |
| TCGA-YC-A9TC | 2 |

|              |   |
|--------------|---|
| TCGA-K4-A6FZ | 1 |
| TCGA-KQ-A41R | 1 |
| TCGA-DK-AA6M | 1 |
| TCGA-ZF-AA52 | 1 |
| TCGA-K4-A5RJ | 1 |
| TCGA-HQ-A5ND | 1 |
| TCGA-BT-A3PK | 1 |
| TCGA-FD-A3N6 | 1 |
| TCGA-UY-A78P | 1 |
| TCGA-CF-A9FL | 2 |
| TCGA-CF-A9FM | 2 |
| TCGA-ZF-A9RD | 1 |
| TCGA-G2-AA3D | 2 |
| TCGA-DK-A2I2 | 1 |
| TCGA-FD-A62S | 1 |
| TCGA-MV-A51V | 2 |
| TCGA-E5-A2PC | 1 |
| TCGA-DK-A3X2 | 1 |
| TCGA-GD-A76B | 1 |
| TCGA-GC-A6I1 | 1 |
| TCGA-XF-A9SK | 1 |
| TCGA-DK-A1AD | 1 |
| TCGA-K4-A5RI | 1 |
| TCGA-FD-A3SQ | 1 |
| TCGA-GV-A3QF | 1 |
| TCGA-E7-A7DV | 1 |
| TCGA-XF-AAN1 | 1 |
| TCGA-DK-AA6P | 1 |
| TCGA-CF-A47Y | 2 |
| TCGA-CF-A3MI | 1 |
| TCGA-G2-A2EL | 1 |
| TCGA-XF-AAMZ | 1 |
| TCGA-DK-AA6L | 1 |
| TCGA-XF-A9T4 | 1 |
| TCGA-K4-A6MB | 1 |
| TCGA-UY-A8OB | 1 |
| TCGA-ZF-A9R5 | 2 |
| TCGA-CU-A3KJ | 1 |
| TCGA-DK-AA6S | 1 |
| TCGA-E7-A85H | 1 |
| TCGA-G2-AA3C | 1 |
| TCGA-E7-A8O8 | 2 |
| TCGA-XF-A9SM | 1 |
| TCGA-DK-A3IN | 1 |



|              |   |
|--------------|---|
| TCGA-XF-A8HC | 1 |
| TCGA-ZF-AA4W | 1 |
| TCGA-LC-A66R | 1 |
| TCGA-E7-A8O7 | 2 |
| TCGA-LT-A8JT | 2 |
| TCGA-FJ-A3Z9 | 1 |
| TCGA-DK-A1AC | 1 |
| TCGA-C4-A0F1 | 1 |
| TCGA-G2-A2ES | 1 |
| TCGA-XF-AAN4 | 1 |
| TCGA-4Z-AA83 | 2 |
| TCGA-E7-A5KE | 2 |
| TCGA-ZF-AA4V | 1 |
| TCGA-ZF-AA53 | 1 |
| TCGA-ZF-A9RM | 2 |
| TCGA-CU-A72E | 1 |
| TCGA-2F-A9KR | 1 |
| TCGA-E5-A4U1 | 2 |
| TCGA-E7-A3Y1 | 2 |
| TCGA-FD-A6TC | 1 |
| TCGA-FD-A5BV | 2 |
| TCGA-DK-A2I4 | 1 |
| TCGA-UY-A78M | 1 |
| TCGA-4Z-AA7R | 1 |
| TCGA-E7-A519 | 1 |
| TCGA-DK-A3IU | 1 |
| TCGA-FD-A3SM | 1 |
| TCGA-BL-A5ZZ | 1 |
| TCGA-FD-A62N | 1 |
| TCGA-BT-A20J | 1 |
| TCGA-DK-AA71 | 1 |
| TCGA-KQ-A41O | 2 |
| TCGA-E7-A677 | 1 |
| TCGA-DK-A1A5 | 1 |
| TCGA-HQ-A5NE | 1 |
| TCGA-XF-AAMT | 1 |
| TCGA-XF-A9SU | 1 |
| TCGA-CF-A47S | 1 |
| TCGA-FD-A6TK | 1 |
| TCGA-E7-A5KF | 2 |
| TCGA-UY-A78L | 1 |
| TCGA-S5-A6DX | 1 |
| TCGA-XF-A8HI | 2 |
| TCGA-XF-A9T5 | 1 |

|              |   |
|--------------|---|
| TCGA-XF-A9SX | 1 |
| TCGA-G2-A2EK | 1 |
| TCGA-XF-A8HD | 1 |
| TCGA-GV-A3JX | 1 |
| TCGA-H4-A2HQ | 1 |
| TCGA-XF-A9SP | 1 |
| TCGA-DK-A3IK | 1 |
