# Supplementary material for: Ferroptosis‐Related Long Noncoding RNAs Have Excellent Predictive Ability for Multiomic Characteristics of Bladder Cancer
Source: Hindawi journal article supplement (doi:10.1155/2022/9316847), 2022-01-01
Supplement: f1 [file 9316847.f1.zip]

|     |              |            |            |            |              |             |
|-----|--------------|------------|------------|------------|--------------|-------------|
| id  | futime       | fustat     | AC092802.3 | AC009095.1 | TXNDC12-AS1  | AL450998.3  |
|     | AC079313.2   | ZFAS1      | AC027449.1 | AL035530.2 | AC004846.2   | AC018752.1  |
|     | MIRLET7A1HG  | MIR100HG   | AC073487.1 | AP001160.1 | SSBP3-AS1    | AL139220.2  |
|     | AL137779.1   | AC069277.1 | AP001189.3 | AC011405.1 | AL356124.1   | FO680682.1  |
|     | THUMPD3-AS1  | GAS5       | AC073529.1 | OSMR-AS1   | AL162724.2   | AL162727.2  |
|     | AC053503.3   | AC009065.5 | BNC2-AS1   | AC078778.1 | AC087286.2   | AL031670.1  |
|     | AC022893.1   | AC022154.1 | AC011472.4 | AP001107.1 | MIR497HG     | MAP3K20-AS1 |
|     | ENTPD1-AS1   | ARAP1-AS2  | AL589765.6 | RBMS3-AS3  | AL390719.2   | AP001619.1  |
|     | AC092171.1   | AC129507.1 | AC005387.1 | AP005899.1 | EPB41L4A-AS1 | AL157871.5  |
|     | AC108449.2   | SH3RF3-AS1 | AP003171.1 | AC005785.1 | LSAMP-AS1    | CARMN       |
|     | AC020765.2   | GRK5-IT1   | AC024270.4 | AC010422.2 | AC002398.2   | HAND2-AS1   |
|     | AC109460.3   | AC008750.5 | AC012557.1 | AL136084.3 | AC058791.1   | AC005070.3  |
|     | AC036108.3   | AL731566.2 | AC024075.1 | AL731567.1 | AC006160.1   | GATA6-AS1   |
|     | MIR1-1HG-AS1 | AP001001.1 | AC090825.1 | AC025031.2 | CRTC3-AS1    | DCUN1D2-    |
| AS  | AC006059.1   | AP003900.1 | AC004837.2 | AC087854.1 | AC040904.1   | AC008434.1  |
|     | AP001469.2   | AC011510.1 | AC012568.1 | MKNK1-AS1  | C1QTNF7-AS1  | ADAMTS9-    |
| AS1 | AL513327.1   | AF001548.1 | LINC02489  | MBNL1-AS1  | AC004918.5   | HMGA2-AS1   |
|     | AL445649.1   | AL355102.1 | AC005180.1 | LINC00685  | AL513320.1   | AC079313.1  |
|     | GNG12-AS1    | AC145285.6 | AC008870.4 | AC139887.2 | AC244093.5   | AC004637.1  |
|     | AC008635.2   | AC139530.1 | AC020978.1 | AC127024.6 | STARD13-AS   | AC015849.4  |
|     | AC093249.2   | DHDDS-AS1  | MSC-AS1    | FMR1-IT1   | AC025280.1   | AC024267.6  |
|     | AC010976.1   | UBL7-AS1   | Z98885.3   | AC026356.1 | AL121906.1   | LINC-PINT   |
|     | AC023825.2   | AC005180.2 | AC023024.1 | AC104984.6 | MIR762HG     | AC011442.1  |
|     | AL021368.2   | COL4A2-AS1 | AC138393.3 | AC007619.1 | AL354993.2   | AC034236.2  |
|     | AC019183.1   | AL031429.2 | AC131097.3 | LINC01081  | AL513327.2   | AP003419.3  |
|     | OPA1-AS1     | AC007365.1 | LINC00630  | AL161719.1 | AP001432.1   | AC009716.1  |
|     | AC068790.3   | AC037487.2 | AL117336.1 | LINC00641  | AC015908.2   | ITFG1-AS1   |
|     | AC138932.6   | AC127024.4 | AL359220.1 | ACTA2-AS1  | AC138956.2   | AC024075.3  |
|     | AL354726.1   | AC067852.3 | HID1-AS1   | AC008764.6 | AC104170.1   | AC068790.2  |
|     | PRR34        | AL139383.1 | AC090559.1 | AC022973.4 | AC136604.2   | AL353804.1  |
|     | AC114271.1   | WASHC5-AS1 | PABPC4-AS1 | LINC01409  | H1FX-AS1     | AC079921.2  |
|     | AL355073.2   | KLF7-IT1   | AL133371.2 | NCBP2-AS1  | AC108463.2   | SDCBP2-AS1  |
|     | ANKRD44-IT1  | MCM3AP-AS1 | AP000766.1 | AP003071.4 | AC007622.2   |             |
|     | AC004884.2   | AC061992.2 | AC234775.3 | AC078795.1 | AC007390.1   | AL139021.3  |
|     | LAMTOR5-AS1  | AC087286.1 | AC012645.4 | AC110609.1 | AC069549.1   | AL353804.2  |
|     | MAGI2-AS3    | AL731577.2 | AC010618.2 | AC008115.3 | AC087294.1   | AC138207.4  |
|     | PRC1-AS1     | AC005740.4 | FENDRR     | AC234772.2 | AL590729.1   | RASA3-IT1   |
|     | LINC00702    | AL133243.3 | AL606534.1 | WWTR1-IT1  | AC093423.2   | AL133445.2  |
|     | AL157838.1   | AC091057.1 | AP003071.3 | AC073130.2 | AL132642.1   | AC087276.3  |
|     | AC068790.6   | GTF3C2-AS1 | AC106820.5 | AC063919.1 | AL596223.1   | AL117329.1  |
|     | AC015849.3   | AC022272.1 | AP001020.3 | LINC02595  | AL139353.2   | GSN-AS1     |
|     | FTX          | AC005519.1 | AC016924.1 | AC099811.5 | SPAG5-AS1    | TGFB2-AS1   |
|     | SBF2-AS1     | AL133415.1 | AC106782.5 | AC093010.2 | AC105339.2   | SOCAR       |
|     | RNF216-IT1   | AC087301.1 | LINC00092  | AC087286.4 | AC092119.2   | LINC01697   |

# RORA-AS1

|              |                    |                                   |                    |                   |                           |                   |             |             |   |
|--------------|--------------------|-----------------------------------|--------------------|-------------------|---------------------------|-------------------|-------------|-------------|---|
| TCGA-CF-A47X | 384                | 0                                 | 0.3238117          | 0.2597087         | 0.07339593                | 0.3650406         |             |             |   |
|              | 0.01552912         | 65.225780                         | 0.1985753          | 0.4062753         | 0.4179293                 | 0.2499809         |             |             |   |
|              | 0.05846821         | 0.8408621                         | 0.9565937          | 0.4429349         | 0.03408291                | 0.04790953        |             |             |   |
|              | 0.7784388          | 0.5069506                         | 0.09646323         | 0.03321506        | 0                         | 3.54206462.86093  |             |             |   |
|              | 0.02795241         | 0                                 | 0                  | 0.07265268        | 0                         | 1.4495320         | 0.1012268   | 0.04348153  |   |
|              | 0.8150350.7034966  |                                   | 0.1834071          | 0.5552529         | 0.1901538                 | 0.02240849        |             |             |   |
|              | 0.05647322         | 0.06757546                        | 0.1258676          | 0.3920466         | 0                         | 20.1786           | 0.1284018   |             |   |
|              | 0.0762226          | 0.03141179                        | 0.7337508          | 0.9495599         | 7.5434730.2692102         |                   |             |             |   |
|              | 1.1957420.09840272 |                                   | 0.05394325         | 0.9986417         | 2.4390540.02705639        | 2.8564950         |             |             |   |
|              | 0.4089949          | 1.0620450                         | 0.01313869         | 0.1646197         | 0.2123517                 | 0.9628561         |             |             |   |
|              | 0.1634272          | 0.004486837                       | 0.3091034          | 0.03752048        | 0.4222445                 | 1.366562          |             |             |   |
|              | 4.1618040.3443737  |                                   | 0.7398777          | 0.01689597        | 0.2991752                 | 0                 | 0.1373101   |             |   |
|              | 0.2998726          | 0.3077513                         | 0.2924618          | 0.01547886        | 0.1962915                 | 0.1689763         |             |             |   |
|              | 0.06434487         | 0.1306822                         | 0.3311286          | 0                 | 0.03040022                | 0.1232421         | 0.2689431   |             |   |
|              | 0.006194663        | 0.6218454                         | 0.07826675         | 0.04053363        | 0.2462303                 | 1.59777           |             |             |   |
|              | 0.002378403        | 0                                 | 0                  | 0.1466668         | 3.2519710.9227592         | 0.02628005        | 0.02898769  |             |   |
|              | 0.7738526          | 0.09154006                        | 0.9201520.3397373  |                   | 0.08930854                | 0.05106372        | 3.03381     |             |   |
|              | 0.1005764          | 0.4061011                         | 0.01074824         | 0.2044975         | 0.5060817                 | 0.2441213         |             |             |   |
|              | 0.04795146         | 0.4183354                         | 0                  | 0.1197738         | 0.2213533                 | 1.4013260.1306673 |             |             |   |
|              | 0.1797578          | 0.0652223                         | 0.3909004          | 0.04270507        | 0.2042549                 | 0.2603855         |             |             |   |
|              | 0.1195742          | 1.7946011.5681860.2949140.1062882 |                    |                   | 0.5509178                 | 0.2786195         |             |             |   |
|              | 0.5559539          | 1.8448590.02841367                | 0                  | 0                 | 0.03085786                | 0.2447574         | 0.4440667   |             |   |
|              | 0.2020973          | 0.1373101                         | 0.3237918          | 0.1118096         | 0.1655643                 | 0.1802626         |             |             |   |
|              | 0.3373160          | 0.5139906                         | 2.2420950.01853864 |                   | 0.3896667                 | 0.2803516         |             |             |   |
|              | 1.3976210.7777745  |                                   | 0.1217155          | 1.0870380.8883937 |                           | 0.1070814         | 0.1405135   |             |   |
|              | 0.2288782          | 1.3107510.2116358                 |                    | 0.1288053         | 0.04074946                | 0.03739128        |             |             |   |
|              | 0.1160289          | 0.2150799                         | 0.3649264          | 0.5726836         | 0.2091380.4155560.2864573 |                   |             |             |   |
|              | 0.1976648          | 1.1244170.1892163                 | 0.3348937          | 0                 | 0                         | 1.0468060.1393098 |             |             |   |
|              | 0.6294             | 0                                 | 0.2754688          | 0.5753426         | 0.07822612                | 0.2511477         | 0.1576803   |             |   |
|              | 0.2053294          | 0.6561999                         | 0.2008755          | 0.4942694         | 0.1438487                 | 0.08938881        |             |             |   |
|              | 0.02526216         | 0.5544817                         | 0                  | 0                 | 0.2894592                 | 0.1036824         | 0.5687854   |             |   |
|              | 1.0917650.02613644 |                                   | 0.07557027         | 0.9416199         | 0.1914251                 | 0.3148663         |             |             |   |
|              | 0.2660724          | 0                                 | 0.2253755          | 0                 | 0.06978834                | 0.6066281         | 0.3101348   | 0           | 0 |
|              | 0.05445505         | 0.7684865                         | 0.2093590          | 0.1095336         | 0.07784216                | 0.2734861         |             |             |   |
|              | 0.1668477          | 0.2117268                         | 0.01632412         | 0.2824588         | 0.01484625                | 0                 | 2.146455    |             |   |
|              | 0.0923353          | 0.1925466                         | 0                  | 0.1842685         | 0.1265282                 | 0.4703408         | 0.7872479   |             |   |
|              | 0.1082936          | 0.03504006                        | 0.7745041          | 0.1288053         | 0.2280895                 | 0.5267639         |             |             |   |
|              | 0.02032423         | 2.8865963.2817030.2355543         |                    | 0.0322810         | 0.3576051                 | 0.03111211        |             |             |   |
|              | 0.05770337         | 1.7418860.007080634               |                    | 0.07752355        |                           |                   |             |             |   |
| TCGA-ZF-AA51 | 1714               | 0                                 | 0.155167763        | 0.047409586       | 0.080390167               | 0.22554345        | 0           |             |   |
|              | 42.419235446       | 0                                 | 0.177220968        | 0.242722435       | 0                         | 0                 | 1.404461516 | 0.178256458 |   |
|              | 1.109384307        | 0.143746442                       | 0.165041546        | 0.052475051       | 0.322331861               | 0.531118447       |             |             |   |
|              | 0.026413912        | 0.14552109                        | 0.091108856        | 3.386200387       | 65.574664536              | 0.132669877       |             |             |   |

|                   |                   |                   |                  |                  |             |             |
|-------------------|-------------------|-------------------|------------------|------------------|-------------|-------------|
| 0.166814168       | 0                 | 0.159152179       | 0                | 0.930147047      | 0.2937622   | 0.110873211 |
| 0.047625084       | 1.174609692       | 0.115137565       | 0.094534001      | 0.640174244      | 0.191387336 |             |
| 0.155444704       | 0.072163951       | 0.067742576       | 0.034465521      | 0.057254199      | 0           | 6.847010542 |
| 0.140637832       | 0.041743101       | 0.055048258       | 2.411019872      | 0.693365192      | 4.333255989 |             |
| 0.058972899       | 0.569430351       | 0.489908905       | 0                | 0.411205591      | 0.056840064 | 0.045439898 |
| 2.546619069       | 0                 | 0                 | 0.34650061       | 0.047625084      | 0.057562926 | 0.106410757 |
| 0.132907211       | 0.257222221       | 0.429602124       | 0.039315266      | 0.130671999      | 0.023483418 |             |
| 0.194729305       | 0.172706348       | 2.517325863       | 0.083820148      | 0.103453282      | 0.018506067 |             |
| 0.10082616        | 0.12173724        | 0.100263335       | 0.131379542      | 0.168539171      | 0.560580605 | 0           |
| 0.257996351       | 0.03855809        | 0.422859489       | 0                | 0.080596296      | 0           | 0.066594397 |
| 0.038567553       | 0.034655519       | 0.022616603       | 0.234863427      | 0.114300201      | 0           | 0.281628059 |
| 1.223321074       | 0.015630311       | 0.045488503       | 0.136663284      | 0                | 1.982894848 | 0.960158444 |
| 0.057568783       | 0.163286002       | 0.122544076       | 0                | 0.259443314      | 0.175111729 | 0           |
| 0.167789441       | 1.542214401       | 0.07344055        | 0.444800312      | 0.007848328      | 0.074661652 |             |
| 0.130425541       | 0                 | 0.570227771       | 0.824760928      | 0                | 0.052475051 | 0.182548416 |
| 0.753646064       | 0.035779801       | 0.833877666       | 0.071437626      | 0.918958429      | 0.140323908 |             |
| 0.167789441       | 0.060680609       | 0                 | 0.623455644      | 0.601169092      | 0.117460969 | 0.174625308 |
| 0                 | 0.07629261        | 0.231974578       | 0.507606484      | 0                | 0.048432289 | 0.27524129  |
| 0.067596893       | 0.067020374       | 0.425585856       | 0.126489156      | 0.100263335      | 0.585939222 | 0           |
| 0.060447222       | 0                 | 0.113680128       | 0                | 1.219770805      | 0.335500591 | 0.12183161  |
| 0.200846999       | 1.004948484       | 0.408215005       | 0.213782837      | 0.128376758      | 0.178594065 |             |
| 0.294864497       | 0                 | 0.090531553       | 0.077135105      | 0.334227268      | 0.278164207 | 0.112863754 |
| 0.0334745         | 0                 | 0.367136765       | 0                | 0                | 0.209085734 | 1.217969618 |
| 0.11409276        | 0.148132398       | 0.726073647       | 0.276330157      | 0                | 0.095977268 | 0.427653815 |
| 0.167789441       | 0.30517044        | 0.278849678       | 0.0294037        | 0.239722316      | 0.47072909  |             |
| 0.4406433         | 0.14670971        | 0.172706348       | 0.370417319      | 0.191661923      | 0.060004878 |             |
| 0.429790397       | 0.078778334       | 0.099368376       | 0                | 0.414755679      | 0           | 0           |
| 0.508328637       | 0                 | 0.341658211       | 0.687050391      | 0                | 0.359553614 | 0.06988895  |
| 0.098534656       | 2.419312209       | 0.357188129       | 0.054856118      | 0                | 0.060224498 | 0.491787651 |
| 0.181167466       | 0                 | 0.215784133       | 0                | 1.507556612      | 0.941196943 | 0.085881299 |
| 0                 | 0                 | 0.202915359       | 0                | 0.123750218      | 0           | 0.220966997 |
| 0.515287793       | 0.080907478       |                   |                  |                  |             |             |
| 0.073354855       | 0.083820148       | 0.087751411       | 0.032996594      | 0.435708938      | 0.18395058  |             |
| 0.118613416       | 0                 | 0.426204141       | 0.112863754      | 0.090845536      | 0.21339678  | 0           |
| 0.306958549       | 4.736412453       | 0.043605857       | 0.459643667      | 0                | 0.391682933 | 0.149938469 |
| 0                 | 0.063244578       | 0.00775538        | 0.077191934      |                  |             |             |
| TCGA-BL-A0C8      | 1219              | 0                 | 2.10138696666667 | 1.61770573333333 |             |             |
| 2.05787444333333  | 1.48387426666667  | 0.160236866666667 | 15.53759         |                  |             |             |
| 0.101114176666667 | 0.40107027        | 0.779594366666667 | 2.96199246666667 |                  |             |             |
| 4.78778796666667  | 0.250871266666667 | 2.89185166666667  |                  |                  |             |             |
| 0.436099666666667 | 1.02155093333333  | 0.05223884        | 1.22175          |                  |             |             |
| 0.410754566666667 | 0.830786866666667 | 1.80744763333333  |                  |                  |             |             |
| 2.77196096666667  | 3.09086316666667  | 5.52581533333333  |                  |                  |             |             |
| 20.3680466666667  | 0.8051801         | 0.17595565        | 1.39453016666667 | 1.5348319        |             |             |
| 0                 | 1.14356693333333  | 0.06149106        | 2.66573031333333 | 3.4094962        |             |             |

|                                   |                          |                            |                            |
|-----------------------------------|--------------------------|----------------------------|----------------------------|
| 2.57014723333333                  | 2.86842033333333         | 0.50510586666667           |                            |
| 27.2797166666667                  | 0.7658587                | 0.296343633333333          | 0.526981893333333          |
| 0.57551027                        | 1.82680779666667         | 0.4706807                  | 0.489728633333333          |
| 4.62606933333333                  | 1.85836736666667         | 2.3408421                  | 1.22328983333333           |
| 0.3416985                         | 3.61638096666667         | 3.9366331.76304849666667   |                            |
| 10.1647656666667                  | 0.304618603333333        | 1.48781536666667           |                            |
| 1.05002576666667                  | 0.151017886666667        | 6.0141659                  | 0.928434466666667          |
| 3.60666812                        | 2.26670623333333         | 0.269734683333333          | 0.0151819133333333         |
| 0.0226325226666667                | 0.152463023333333        | 1.90685203                 | 4.42262733333333           |
| 1.8747995.9846073.36905053333333  | 0.841346933333333        | 1.936491033333333          |                            |
| 4.44277533333333                  | 15.6686446666667         | 1.0450910.0658848133333333 |                            |
| 0.00798779333333333               | 1.0616963                | 0.1972947                  | 1.416719233333333          |
| 2.18035416666667                  | 0.833887666666667        | 3.86525753333333           | 0.01758157                 |
| 2.41787893333333                  | 0.916472733333333        | 2.16982676666667           | 0.6130089                  |
| 1.96534356666667                  | 1.0827424.18296566666667 | 0.747778833333333          |                            |
| 0.948107933333333                 | 0.724302173333333        | 2.96655363333333           | 0.6393345 0                |
| 1.0218677.3131410.105965556666667 | 0.592649766666667        | 0.904658366666667          |                            |
| 1.05654246666667                  | 1.44550876666667         | 0.581570833333333          |                            |
| 1.24007803333333                  | 1.10939726666667         | 0.6635181                  | 1.02254226666667           |
| 5.87883833333333                  | 1.55847390666667         | 1.6211746                  | 0.766865063333333          |
| 4.14474233333333                  | 1.47516523333333         | 0.842001866666667          |                            |
| 1.96103061333333                  | 2.84516526666667         | 0.366506733333333          |                            |
| 2.61481873333333                  | 0.482196766666667        | 2.6062483                  | 0.125370133333333          |
| 2.05545653333333                  | 3.25380246666667         | 3.36794366666667           |                            |
| 2.01835126666667                  | 0.7018651                | 0.745419533333333          | 6.41455986666667           |
| 0.408529766666667                 | 0.871997366666667        | 2.18375966666667           |                            |
| 4.18849909333333                  | 0.772371366666667        | 5.26811533333333           |                            |
| 0.951554033333333                 | 0.998068066666667        | 2.2546221                  | 2.18166356666667           |
| 5.51916433333333                  | 0.7392174                | 4.71265446666667           | 0 0.139703833333333        |
| 0.0350497                         | 2.81316996666667         | 0.851647866666667          | 4.07603533333333           |
| 1.97321 2.5294164                 | 0.3949552                | 2.28553476666667           | 0.90867847 4.3397386       |
| 10.74980526 2.30045563333333      | 4.49699366666667         | 2.95965766666667           |                            |
| 0.9620763                         | 2.38175043333333         | 5.5155568                  | 2.57423926666667 1.6295923 |
| 3.48519506666667                  | 4.11788033333333         | 2.6319589                  | 1.05731596666667           |
| 1.34368943333333                  | 1.05773213333333         | 1.5568014                  | 4.6278801 0.24330245       |
| 0.287127923333333                 | 0.2626916                | 10.1175053333333           | 1.1018266                  |
| 5.57333356666667                  | 0.359018833333333        | 4.29533286666667           |                            |
| 6.50901153333333                  | 1.36444396666667         | 0.4476813                  | 0.860719433333333          |
| 0.268902306666667                 | 4.2896811                | 0.651627603333333          | 2.55554346666667           |
| 2.25348946666667                  | 4.5377451.24158129666667 | 2.11289876666667           |                            |
| 2.68228696666667                  | 0.0627626466666667       | 2.42950023333333           |                            |
| 8.54673976666667                  | 0.249944533333333        | 1.73991813333333           |                            |
| 1.46002386666667                  | 1.9639512                | 1.14308380333333           | 1.4996029                  |
| 4.30130233333333                  | 1.3090167                | 0.9396760.4042712          | 5.15354446666667           |



|                                   |                           |                    |                                          |
|-----------------------------------|---------------------------|--------------------|------------------------------------------|
| 0.592169166666667                 | 1.22353823333333          | 0.944007766666667  |                                          |
| 3.55861166666667                  | 3.34673246666667          | 3.84680933333333   |                                          |
| 0.544268173333333                 | 0.697121566666667         | 0.5120619          | 0.334740966666667                        |
| 2.19818323333333                  | 0.0956269333333333        | 0.301225166666667  | 2.447589                                 |
| 0.266072026666667                 | 0.975148976666667         | 2.31203433333333   | 2.9068289                                |
| 6.9816426                         | 2.1766985                 | 0.0719075866666667 | 3.04749546666667                         |
| 0.265249633333333                 | 0.914978996666667         | 4.0652873          | 1.21303436666667                         |
| 1.20751346666667                  | 21.0490333333333          | 0.0381529866666667 | 6.8702901                                |
| 6.52640933333333                  | 2.2059417                 | 2.64729373333333   | 0.0701818                                |
| 1.07315566666667                  | 2.0473398.79053693333333  | 1.56678843333333   |                                          |
| 9.95875866666667                  | 2.07796115333333          | 3.2859678          | 0.342563596666667                        |
| 6.35184143333333                  | 1.42535213333333          | 0.129254626666667  |                                          |
| 0.810156266666667                 | 6.0728510.517966686666667 | 1.2117322          |                                          |
| 2.10178916666667                  | 1.06341763333333          | 0.21587308         | 2.90645764666667                         |
| 1.26669506666667                  | 0.977236866666667         | 1.0991987          |                                          |
| TCGA-BT-A42C                      | 873 0                     | 0.1643177          | 0.3631512 0.07945525 0.5471684           |
| 0.05043345                        | 33.109970                 | 0.1194272          | 0.5797575 0 0.1407216 0.1222251          |
| 0.5285502                         | 1.27923                   | 0.1065560.1184578  | 0.02593239 0.005138439 0.1193049         |
| 0.08484686                        | 0.1258501                 | 0.5853204          | 3.31216335.387810.2067771 0.0471069      |
| 0.05043345                        | 0.07865064                | 0.06934599         | 0.6974225 0 0.4657311 0.02353561         |
| 0.7894455                         | 0.3370188                 | 0.3036624          | 0.6643657 0.3671960.07681846             |
| 0.1528387                         | 0.06571485                | 0.2640014          | 0.5658835 0 3.2735240.03475056           |
| 0.02062882                        | 0.07481109                | 0.7060683          | 3.2837373.6232450.2331482 0.6472292      |
| 0.09684228                        | 1.5767091.0892150.1685371 | 0.02050305         | 2.55296 0.03883375                       |
| 0.11069                           | 0.6115552                 | 0                  | 0.01422337 0.6047461 0.3940846 0.6864232 |
| 0.1415353                         | 0.004857255               | 0.1350229          | 0.1624722 0.5533359 1.251784             |
| 2.2526940.04142267                | 0.02556254                | 0.004572712        | 0.1619371 0.01203215                     |
| 0.1238716                         | 0.4220178                 | 0.2915134          | 0.0395758 0 0.1912469 0.232469           |
| 0.1393139                         | 0.2546476                 | 0.4381244          | 0.1086259 0.03290996 0.1778888           |
| 0.01712624                        | 0.05588395                | 0.6151499          | 0.31067 0 0.3656329 1.494575             |
| 0.03089707                        | 0.2697569                 | 0.1350739          | 0.1323126 2.4316460.5244430.2275971      |
| 0.1748360.5248487                 | 0.5945838                 | 0.4339518          | 0.2596128 0.03222718                     |
| 0.02763968                        | 3.0799860.03629323        | 0.2198137          | 0.01163558 0.11069 0.4189534             |
| 0.3817307                         | 0.07168548                | 2.1284970.1194885  | 0.1037296 0.4567019                      |
| 1.1718260.1149321.0416720.1059102 | 0.6743226                 | 0.06934599         | 0.1934778                                |
| 0.1739272                         | 0                         | 1.0526840.7639427  | 0.1857519 0.1438287 0.4066362            |
| 0.3393241                         | 0.8311283                 | 0.7814992          | 0.3383535 0.07180355 0 0                 |
| 0.2980843                         | 1.1116820.1562727         | 0.07432298         | 0.4724440.08069352 0.4182097             |
| 0                                 | 0.1404476                 | 0.02892645         | 0.6491613 1.6688660.04013825 0.4714641   |
| 0.4966306                         | 1.5634370.4706152         | 0.1220036          | 0.8237463 0.49544 0                      |
| 0.3937063                         | 0.07623805                | 0.4204331          | 0.1145538 0.1394390.0661704              |
| 0.02023909                        | 0.06978213                | 0.03326232         | 0.2370321 0.9299436 0.132529             |
| 0.1852377                         | 0.8457442                 | 0.2280612          | 0.7494233 0.06827913 0.08366339          |
| 0.2134374                         | 0                         | 0.8291905          | 0.1885134 1.3933450.08718523 0.7087607   |

|                    |                           |                    |                    |                   |            |            |
|--------------------|---------------------------|--------------------|--------------------|-------------------|------------|------------|
| 0.3864615          | 0.1330752                 | 0.3534461          | 0.1137985          | 0.3661095         | 0.1420747  |            |
| 0.3360732          | 0.4370457                 | 0.3114487          | 0.1169887          | 0                 | 0.33673    | 0.03112926 |
| 0.3133559          | 0.3567695                 | 0.2518946          | 0.7766751          | 1.7825330.2249751 | 0.028709   |            |
| 0.1467868          | 0.08115727                | 0.6103672          | 0.1765171          | 0.2168726         | 0          | 0.01602572 |
| 0.4447008          | 0.0671477                 | 0.1033271          | 0.07109154         | 0.02947534        | 0.6270518  |            |
| 0.8490655          | 0                         | 0.1355158          | 0.02808952         | 0.2565890.2408295 | 0.1623545  |            |
| 0.1060307          | 0                         | 0.02410787         | 0                  | 3.02394           | 0.07996655 | 0.3715715  |
| 0.2168272          | 0.05218056                | 0.1595908          | 0.5908867          | 0.4298579         | 0.03793285 |            |
| 0.6359217          | 0.0278878                 | 0.1122363          | 0.7850726          | 0.04400425        | 3.519309   |            |
| 5.3196920.3124658  | 0.1572570                 | 0.09678194         | 0.03368062         | 0.04164478        | 1.08349    |            |
| 0.10348            | 0.1220707                 |                    |                    |                   |            |            |
| TCGA-G2-A3IB       | 220                       | 1                  | 0.1591313          | 0.2917236         | 0.04122181 | 0.2943877  |
| 23.296330.1584052  | 0.1652253                 | 0.3733837          | 0.1564828          | 0.2246373         |            |            |
| 0.1154987          | 0.5179611.0113080.2272698 | 0.09268852         | 0.05381545         | 0                 |            |            |
| 0.02475841         | 0.02031646                | 0.01865478         | 0.1401542          | 0.7525887         | 24.21876   |            |
| 0.04709726         | 0.4154683                 | 0.05233028         | 0.08160875         | 0                 | 0.6743131  | 0.03765824 |
| 0.3126896          | 0.0732624                 | 0.9395985          | 0.1407860.1454231  | 0.2954370.3232782 |            |            |
| 0.03775626         | 0.06872104                | 0.06818643         | 0                  | 0                 | 0.1577592  | 8.83454    |
| 0.06421405         | 0.007056798               | 0.3663120.5629353  | 0.8531214          | 0.1511982         |            |            |
| 0.7007708          | 0.06029075                | 0                  | 0.4723144          | 0.02914598        | 0.04153531 | 0.4477147  |
| 0.08058864         | 0                         | 0.3299692          | 0                  | 0.001639814       | 0.1060975  | 0.06815107 |
| 0.3956889          | 0.03671464                | 0.01511982         | 0.1644666          | 0.1926662         | 0.2080244  |            |
| 1.5055020.06977371 | 0.1289418                 | 0.05304792         | 0                  | 0.05170081        | 0          | 0.07711831 |
| 0.1010516          | 0.08642213                | 0.1231928          | 0                  | 0.3748309         | 0.0593145  | 0.2891072  |
| 0                  | 0.4132751                 | 0                  | 0.06829546         | 0.1054739         | 0.03554074 | 0          |
| 0                  | 0.1346204                 | 1.1325970.06144667 | 0                  | 0.03503854        | 0.0274578  | 2.485444   |
| 0.3368657          | 0.2066375                 | 0.08838004         | 0.3351314          | 0.2827672         | 0.5526078  |            |
| 0.08979236         | 0                         | 0.1433962          | 1.0679930.03765824 | 0.1140405         | 0.01609761 |            |
| 0.1914219          | 0.3343927                 | 0.2742146          | 0.1718472          | 0.5168951         | 0.1859738  |            |
| 0.08072318         | 0.2310891.0368130.1742953 | 0.2494269          | 0                  | 0.3105742         |            |            |
| 0.09593886         | 0                         | 0.30493            | 0.1343144          | 0.5416977         | 0.4844126  | 0.0271038  |
| 0.1790859          | 0.2531580.0391207         | 0.08921252         | 0.1501652          | 0                 | 0          | 0.08468158 |
| 0                  | 0.1374646                 | 0.4676323          | 0                  | 0.2056488         | 0.5297463  | 0.1674569  |
| 0.1549782          | 0                         | 0.1457299          | 0.06002878         | 0.1443379         | 0.8488952  | 0          |
| 0.07724151         | 0.3149112                 | 1.2559270.4816716  | 0.1367197          | 0.1221041.270065  |            |            |
| 0.04009385         | 0.1764037                 | 0.01977635         | 0.3661349          | 0.09508984        | 0.02893667 |            |
| 0.1258750.06300089 | 0.1303320.10354           | 0.1147753          | 0.1429510.1432432  |                   |            |            |
| 0.1647468          | 0.4972802                 | 0.1080942          | 0.06126622         | 0.2479650.1157467 |            |            |
| 0.1968577          | 0.1644666                 | 0.2581131          | 0.0391207          | 0.7546496         | 0          | 0.6379272  |
| 0.1012224          | 0.2259495                 | 0.1974751          | 0.2951965          | 0.1221040         | 0.1230752  |            |
| 0.2330989          | 0.04039531                | 0.05245193         | 0                  | 0.4557322         | 0          | 0.1292002  |
| 0.1393463          | 0.03050237                | 0.4646552          | 0.1401542          | 0.3523001         | 0.127329   |            |
| 2.5035360.04479635 | 0                         | 0.002371998        | 0.15263            | 0.08438601        | 0          | 0.1211502  |
| 0.09121217         | 0                         | 0.1072133          | 0.1475307          | 0.3670071         | 0.3027711  | 1.1337160  |

|              |            |             |             |             |            |             |
|--------------|------------|-------------|-------------|-------------|------------|-------------|
| 0.08788292   | 0          | 0.1433597   | 0.1249436   | 0.05945673  | 0.1650279  | 0.06345562  |
| 0.7087464    | 0.2407745  | 1.42021     | 0           | 0.01880715  | 1.1604760  | 0.3509723   |
| 0.09813439   | 0.1235377  | 0.2829740   | 0.02027387  | 0           | 0.3278182  | 0.4051134   |
| 0.1164576    | 1.33335    | 0.06848893  | 0.6610787   | 0.1535936   | 0.1267058  |             |
| 0.09065089   | 0.09565417 | 0.1004220   | 0.01397895  | 0.1512387   | 0.4432105  |             |
| 0.2863253    | 0.1345783  |             |             |             |            |             |
| TCGA-2F-A9KP | 364        | 1           | 0.1559606   | 0.4093724   | 0.1028375  | 0.4721268   |
| 0.02175837   | 84.766150  | 0.3091451   | 0.1034993   | 0.7807664   | 0.02802054 |             |
| 0.5254293    | 0.6840931  | 1.0249470   | 0.1302517   | 0.02764747  | 0.03356383 |             |
| 0.01330118   | 0.2779456  | 0.1098158   | 0.2326937   | 0.05827459  | 2.624028   |             |
| 90.773070    | 0.1305502  | 0.03048481  | 0.1958253   | 0.2544903   | 0          | 0.5744210   |
| 0.1772904    | 0.06092344 | 0.8114019   | 0.2039364   | 0.2267451   | 0.163786   |             |
| 0.3456401    | 0.05232883 | 0.05275103  | 0.08665834  | 0.2755583   | 0.2929652  | 0           |
| 8.84038      | 0.4947474  | 0.02669952  | 0.008802423 | 0.6282730   | 0.5543585  | 5.302744    |
| 0.3017596    | 0.9833838  | 0.2005461   | 0.4360520   | 0.5260266   | 0.07271152 | 0.005054616 |
| 2.1873210    | 0.2865283  | 0.5065760   | 0.03046172  | 0.008181803 | 0.2646852  |             |
| 0.2550283    | 0.5922835  | 0.8243399   | 0.01257332  | 0.3191228   | 0.1952645  |             |
| 0.4151726    | 1.7306272  | 0.00177     | 0           | 0.02205676  | 0.01183676 | 0.3869396   |
| 0.01557299   | 0.4168446  | 0.3991536   | 0.6468011   | 0.3585558   | 0          | 0.1925214   |
| 0.08385194   | 0          | 0.2197239   | 0.3608542   | 0.07029628  | 0.08518955 | 0.1973471   |
| 0            | 0.1764842  | 0.3755554   | 0.03655406  | 0           | 0.2320364  | 1.4345      |
| 0            | 0.04370595 | 0.03424997  | 0.3288158   | 0.6141318   | 0.03682186 | 0.3017161   |
| 0.2612701    | 0.2565197  | 0.7275999   | 0.3920143   | 0           | 0.0715471  | 1.830477    |
| 0.1409210    | 0.6638356  | 0.005019909 | 0.1432641   | 0.6673771   | 0.5320724  |             |
| 0.0479903    | 0.1172288  | 0           | 0.06712766  | 0.3648772   | 2.2691310  | 0.03432795  |
| 1.3778480    | 0.1370777  | 1.2824280   | 0.08975328  | 0.1073206   | 0.1785363  | 0.05584649  |
| 0.8529281    | 0.3295858  | 0.2516848   | 0.1861550   | 0.3859548   | 0.1951916  |             |
| 0.7789657    | 0.9115811  | 0.1194341   | 0           | 0.1408388   | 0          | 0.3000707   |
| 0.3888730    | 0.2427131  | 0           | 0.3550505   | 0.05222009  | 0.4252925  | 0           |
| 0            | 1.1402690  | 0.9885268   | 0.2857262   | 0.3532781   | 0.9998802  | 1.305502    |
| 0.9033042    | 0.05053028 | 0.7234658   | 1.4333580   | 0.1500353   | 0.2316214  |             |
| 0.02466839   | 0.5150077  | 0.2075710   | 0.1443787   | 0.06423238  | 0.01309755 |             |
| 0.07225421   | 0.08610165 | 0.1329408   | 0.5349375   | 0.3859423   | 0.1712499  |             |
| 2.2257510    | 0.1639864  | 0.7818508   | 0.1325587   | 0.03609468  | 0          | 0.06838345  |
| 0.6439239    | 0.1463937  | 1.2930840   | 0.01880705  | 0.61332     | 0.8449816  | 0.1096053   |
| 0.2815132    | 0.07364372 | 0.2030781   | 0.1838848   | 0.1855034   | 0.4810757  |             |
| 0.1511634    | 0.1252457  | 0           | 0.7011076   | 0           | 0          | 0.1738162   |
| 0.1642968    |            |             |             |             |            |             |
| 0.4346970    | 0.4807654  | 0.6591716   | 0.2779456   | 0.6415117   | 0.08940405 |             |
| 0.08403233   | 0.5148232  | 0.2284629   | 0.5964756   | 0           | 0.03555738 | 0.3948666   |
| 0.08690808   | 0.08915625 | 0           | 0.0762988   | 1.0606811   | 0.6286940  | 0.05493097  |
| 0.1534713    | 0          | 0.3831906   | 0.1558507   | 0.2224932   | 0.04574456 | 0           |
| 0            |            |             |             |             |            |             |
| 0.5123351    | 3.1310650  | 0.2846230   | 0.1290269   | 0.3216758   | 0.1347051  | 0.1055256   |
| 0.2524567    | 0.6324094  | 0.2276008   | 0.04909581  | 1.7352460   | 0.1082840  | 0.2614778   |
| 1.2537020    | 0.02847696 | 2.3167572   | 0.3589240   | 0.1115638   | 0.0678450  | 0.05965797  |

|              |            |            |            |            |            |             |            |
|--------------|------------|------------|------------|------------|------------|-------------|------------|
|              | 0.2505263  | 0.03487378 | 0          | 0.2831653  | 0.01984183 | 0.315988    |            |
| TCGA-DK-A3IT | 648        | 0          | 0.1621569  | 0.2023088  | 0.09801298 | 0.6624667   |            |
|              | 0.76729122 | 0.26258014 | 0.12398    | 0.1571423  | 0.3452529  | 0.5581030   | 0.02670597 |
|              | 1.6100320  | 0.3984441  | 0.6762895  | 0.04381449 | 0.4838893  | 0.2559137   | 0          |
|              | 0.3237740  | 0.09661279 | 0.1108885  | 0.2221627  | 2.11922    | 23.889910   | 0.06843406 |
|              | 0.02905464 | 0.06221278 | 0.1940409  | 2.65182    | 1.58376    | 0.3581596   | 0.4731244  |
|              | 0.2322611  | 0.5155570  | 0.5183171  | 0.1728860  | 0.3512298  | 0.2402055   | 0.129672   |
|              | 0.1508288  | 0.1453022  | 0.3361673  | 0.3141236  | 0.03125862 | 2.698535    |            |
|              | 0.2572018  | 0.2544693  | 0.1426209  | 0.5987980  | 0.2113405  | 1.9597030   | 0.3595035  |
|              | 1.0066750  | 0.1075149  | 0          | 0.4512136  | 0          | 0.2661659   | 0.9758190  |
|              | 0.0603513  | 0.1161305  | 0.4971199  | 0.2162295  | 0.2835745  | 0.6272189   |            |
|              | 0.7856667  | 0.02995863 | 0.2027676  | 0.4652596  | 0.2670942  | 0.807171    |            |
|              | 0.9539293  | 0.1532923  | 0.1786868  | 0.2369104  | 0.3073222  | 0.08905439  |            |
|              | 0.1528033  | 0.2002250  | 0.5650855  | 0.2196864  | 0          | 0.2359150   | 0.22095    |
|              | 0.3490262  | 0.4421893  | 0.4019903  | 0.04059648 | 0.09404435 | 0           | 0.2095664  |
|              | 0.3197567  | 0.9754964  | 0          | 0.9835383  | 1.2221950  | 0.1524538   | 0          |
|              | 0.2082776  |            |            |            |            |             |            |
|              | 1.5668723  | 0.5815960  | 0.3696760  | 0.9475485  | 0.05530025 | 0.09960513  | 0.2444853  |
|              | 0.7177972  | 0.2401864  | 0.2385254  | 0.1022858  | 2.0838290  | 0.0451923   |            |
|              | 0.03349083 | 0.3186004  | 0.2385254  | 0.3259997  | 0.8568415  | 0.6703745   |            |
|              | 0.07369822 | 0.03198921 | 0.2017004  | 2.3531710  | 0.2181165  | 0.8895923   |            |
|              | 0.4790384  | 0.8530385  | 0.2566277  | 1.5001911  | 0.07275    | 0           | 0.4750794  |
|              | 0          |            |            |            |            |             |            |
|              | 0.1145682  | 0.1064530  | 0.2675258  | 0.2790515  | 0.3535339  | 0.5950788   | 0          |
|              | 0.08857413 | 0.1006736  | 0.1648304  | 0.9396916  | 0.8895104  | 0.0771088   |            |
|              | 0.3361673  | 0.4088922  | 0          | 0.4421893  | 0          | 0.5890527   | 0.03568256 |
|              | 0.2859931  | 1.7133060  | 0.2228086  | 0.1530474  | 0.2722776  | 1.2442560   | 0.8214344  |
|              | 1.56519    | 0.6532342  | 0.9347091  | 0          | 0.3200948  | 0.2351109   | 0.3148827  |
|              | 0.08478556 | 0.3440132  | 0.1632506  | 0.02496617 | 0.4820512  | 0.1230934   |            |
|              | 0.2241685  | 0.6373017  | 0.2384123  | 0.4243611  | 0.1391037  | 0.1319809   |            |
|              | 0.7619792  | 0.3790194  | 0.2408093  | 0.2047798  | 0.2607012  | 0.8864768   |            |
|              | 0.2325429  | 0.9963244  | 0.07169892 | 0.2670773  | 0.5368933  | 1.074479    |            |
|              | 0.2683062  | 0.2456607  | 1.1774340  | 0.2920966  | 0.1585110  | 0.3526972   | 0.1920956  |
|              | 0.1140250  | 0.9571738  | 0          | 0.1535995  | 0          | 0.8604148   | 0.3452529  |
|              | 0.5415217  | 1.2564940  | 0.06307287 | 0.6921687  | 0.1171634  | 0.06006751  |            |
|              | 1.4522720  | 0.1337629  | 0          | 0.8613513  | 0.2232536  | 0.05522057  | 0          |
|              | 0.04384791 | 0.1090790  | 0.7964827  | 2.0822310  | 0.1047079  | 0.3552302   | 0.2079009  |
|              | 0.07304271 | 0.07426952 | 0.08246588 | 0.1307955  | 0          | 0.009912849 | 0.2020549  |
|              | 2.23813    | 0          | 0.06707656 | 0.3576820  | 0.2246746  | 0.06839096  | 0.1499925  |
|              | 0.6027404  | 0.02410256 | 0.02339626 | 0.3047859  | 0.03440132 | 0.1661405   |            |
|              | 0.9877081  | 0.1085639  | 0.9356219  | 3.4237410  | 0.09303868 | 0.1077702   |            |
|              | 0.2274366  | 0.5969326  | 0.04985656 | 0.05137141 | 0.3983955  | 0           | 0.1317591  |
| TCGA-FD-A43P | 832        | 0          | 0.04424554 | 0.1182884  | 0.0401152  | 0.1637056   | 0          |
|              | 35.957420  | 0.1541528  | 0.3858955  | 0.4239201  | 0.2284230  | 0.03279103  | 0.6479419  |
|              | 0.2965036  | 1.0251660  | 0.2331237  | 0.03725663 | 0.2094830  | 0.3268798   | 0.2409377  |
|              | 0.2767949  | 0.09076993 | 0.09092779 | 8.44117822 | 0.341790   | 0.5347174   | 0.08324132 |

|              |            |            |            |             |            |            |   |
|--------------|------------|------------|------------|-------------|------------|------------|---|
| 0.1527764    | 0.07941794 | 0          | 1.808581   | 0.4764149   | 0.2213057  | 0.04753043 |   |
| 0.3047916    | 0.1281674  | 0.1768990  | 0.2236157  | 0.1572999   | 0.1265581  |            |   |
| 0.06687621   | 0.1464839  | 0.08599256 | 0.2571319  | 0.1023494   | 6.531462   |            |   |
| 0.1754479    | 0.04166014 | 0.05493885 | 0.4901576  | 0.7496528   | 4.244905   |            |   |
| 0.1765671    | 0.6251285  | 0.09778705 | 0          | 0.4842583   | 0.3119990  | 0.02366066 |   |
| 1.6338590    | 0.03921261 | 0.3353097  | 0.5928205  | 0.04753043  | 0.06861907 |            |   |
| 0.0884994    | 0.1658038  | 0.5647642  | 0.4644774  | 0.009809283 | 0.1304123  |            |   |
| 0.1581980    | 0.2348303  | 0.8618156  | 2.7839250  | 0.2091339   | 0.05162384 | 0.01385197 |   |
| 0.4025031    | 0.2186915  | 0.02501602 | 0.2950165  | 0.3364084   | 0.2397714  | 0          |   |
| 0.2574836    | 0.2347369  | 0.1406730  | 0.08571062 | 0.5228348   | 0          | 0.0128303  |   |
| 0.1037599    | 0.03160032 | 0.3711280  | 0.2281461  | 0.04430803  | 0.4025472  | 1.136557   |   |
| 0.04419787   | 0.06809715 | 0          | 0.3206482  | 0.6230040   | 0.7312962  | 0.05745437 |   |
| 0.1629615    | 0.5095855  | 0.1250801  | 3.1967610  | 0.2839910   | 0.03254158 | 0.02790933 |   |
| 3.8002710    | 0.0366473  | 1.7386720  | 0.0900764  | 0.1117699   | 0.7809980  | 0.2075526  |   |
| 0.3694122    | 0.5487479  | 0.1206542  | 0.1309269  | 0.1622591   | 1.80699    |            |   |
| 0.03570869   | 0.5316964  | 0.1425913  | 1.0630390  | 0.09336335  | 0.3070026  |            |   |
| 0.3936401    | 0.04356956 | 1.5555410  | 0.9856721  | 0.1641185   | 0.2614174  |            |   |
| 0.3284826    | 0.1903525  | 1.2443851  | 1.1593290  | 0.1863569   | 0          | 0.03373128 |   |
| 0.3344359    | 0.5157558  | 0.2524755  | 0.02501602 | 0.8386901   | 0.04074037 |            |   |
| 0.3619625    | 0.3940966  | 0.1701813  | 0.02920865 | 1.1237051   | 0.07037    | 1.519869   |   |
| 0.1252799    | 0.1671585  | 2.2916460  | 0.7208913  | 0.1773992   | 0.4158913  |            |   |
| 0.6179848    | 0.07803504 | 0.1264923  | 0.07698181 | 0.9779461   | 0.1388057  |            |   |
| 0.1689592    | 0.1614719  | 0.2452385  | 0.8878326  | 0.06717363  | 0.3271042  |            |   |
| 0.7303457    | 0.2509161  | 0.1336034  | 0.2561985  | 0.2871469   | 1.7703     |            |   |
| 0.7239251    | 0.02815986 | 0.3591995  | 0.5335049  | 0.2511840   | 0.07614099 |            |   |
| 1.0436080    | 0.1027084  | 0.6022397  | 0.6668038  | 0.1465892   | 0.04575567 |            |   |
| 0.2872719    | 2.23129    | 1.7215290  | 0.1397331  | 0.3175778   | 0.1179327  | 0.1254220  |   |
| 0.5174142    | 0.2070633  | 0.03143295 | 0.3164130  | 0.4627931   | 0.2260907  |            |   |
| 0.3409792    | 2.1713360  | 0.2581475  | 1.8414110  | 0.1830939   | 0.1475082  | 0.3947229  |   |
| 0.1188261    | 0.2463619  | 0.04127643 | 0.01618206 | 0.3916039   | 0.02260093 |            |   |
| 0.06955673   | 0.2512478  | 0.02976289 | 0.4701752  | 1.7215290   | 0.1285659  |            |   |
| 0.1539426    | 0.0567271  | 0.2391620  | 0.3039737  | 0.1735818   | 0.08922095 |            |   |
| 0.2470086    | 0          | 0.2549853  | 0.8356785  | 0.24224     | 0.07320907 | 0.4600946  |   |
| 0.1313655    | 0.09220685 | 0.3197375  | 0.3212737  | 0.5524292   | 0.05745437 |            |   |
| 0.5276064    | 0.05631972 | 0.09066499 | 0.6783574  | 0.0888671   | 1.133489   |            |   |
| 7.0998410    | 0.07615859 | 0.9703907  | 0.04654315 | 0.6352198   | 0.2040552  | 0          |   |
| 0.7679464    | 0          | 0.2234117  |            |             |            |            |   |
| TCGA-DK-A3IV | 294        | 1          | 0.3147748  | 0.3946513   | 0.0393642  | 0.4016021  | 0 |
| 37.377160    | 0.1890835  | 0.4260049  | 0.8319676  | 0.2241466   | 0.4933829  |            |   |
| 0.2097746    | 0.5528102  | 1.52908    | 0.7566657  | 0.08466329  | 0.1027806  |            |   |
| 1.8074590    | 0.07092811 | 0.05820278 | 0.08907061 | 0.08922551  | 3.899972   | 22.75011   |   |
| 0.1099386    | 0.03500698 | 0.3997766  | 0.4286213  | 0           | 1.4763180  | 0.03596122 |   |
| 0.2443079    | 0.09328122 | 1.1733350  | 0.3252621  | 0.2661671   | 0.3134705  |            |   |
| 0.2646086    | 0.08012181 | 0.01514405 | 0.1265417  | 0.3290924   | 0.3924947  |            |   |

|              |             |            |             |            |            |            |            |
|--------------|-------------|------------|-------------|------------|------------|------------|------------|
| 0.05021664   | 14.362190   | 0.5853553  | 0.5110027   | 0.03369396 | 0.8307858  |            |            |
| 1.1883073    | 5348671     | 0.106922   | 6488820     | 0.1343389  | 0          | 0.8537355  | 0.02902213 |
| 2.63649      | 0           | 0.07311829 | 0.6059607   | 0          | 0.01879101 | 0.8134255  | 0.9111189  |
| 0.4282386    | 0.1753007   | 0.02887692 | 0.2850259   | 0.2702263  | 0.508544   |            |            |
| 2.7907485    | 0.0971520   | 0.2052187  | 0.2617298   | 0.1540499  | 0.3826250  | 0.1311428  |            |
| 0.04909538   | 0.3216594   | 0.1650552  | 0.5293858   | 0          | 0.1684421  | 0.1963574  |            |
| 0.1380395    | 0.4766007   | 0.6709072  | 0.05381609  | 0.0326089  | 0.1888515  |            |            |
| 0.06787828   | 0.01328945  | 0.7091928  | 0.5037186   | 0.7826136  | 0.4324084  |            |            |
| 2.4959030    | 0.002551202 | 0          | 0.1003787   | 0          | 2.6970911  | 0.4847010  | 0.05637876 |
| 0.3775668    | 1.43013     | 0.9082645  | 1.2508570   | 0.1929284  | 0          | 0.05477367 |            |
| 2.3122130    | 0.3955734   | 0.5808076  | 0.007686093 | 0.4021506  | 1.21343    | 0.9310488  |            |
| 0.1347115    | 1.4808050   | 0.05919769 | 0.05139032  | 0.2122952  | 1.5121380  | 0.2102411  |            |
| 0.9527473    | 7.079281    | 4.181220   | 0.1374232   | 0.02738683 | 0.6715167  | 0.04275389 |            |
| 2.9934791    | 3.877490    | 4.975172   | 0.08550778  | 0.7252492  | 0.6724398  | 0.4543587  |            |
| 1.3383830    | 0.06095604  | 0          | 0.02695517  | 0          | 0.7548022  | 1.0717420  | 0.09290584 |
| 0.02454769   | 1.0306240   | 0.5996650  | 0.9175643   | 0.03867186 | 0.5288185  | 0.1433091  |            |
| 0.4594448    | 1.4139082   | 2.2470650  | 0.2212821   | 0.8474839  | 2.3486880  | 0.4250717  |            |
| 0.1257231    | 6.032712    | 3.967850   | 4.977319    | 0.4698988  | 0.03777031 | 1.435737   |            |
| 0.2043106    | 0.3315921   | 0.07649258 | 0.2807552   | 0.5808076  | 0.1977482  |            |            |
| 0.3757819    | 1.0579450   | 4.705512   | 0.3408658   | 1.4525460  | 4.101026   | 0.5130467  |            |
| 0.4397543    | 0.02763268  | 0.09399329 | 0.4711653   | 0.6298972  | 0.07471554 |            |            |
| 1.13027      | 0.1007856   | 1.2649080  | 0.9851983   | 0.09589658 | 0.2963339  | 0.1409469  |            |
| 0.1036458    | 0.8211875   | 0.3917633  | 0.3885287   | 0.5014742  | 0.1402471  | 0          |            |
| 3.2929760    | 2.031868    | 0          | 0.2217781   | 0.1059193  | 0.5269128  | 0.7026509  |            |
| 2.6633570    | 0.1317236   | 0.6486442  | 0.1197774   | 0.08041484 | 0.7814618  |            |            |
| 0.08745114   | 0.4566384   | 0          | 0.01361067  | 0.1742036  | 0.06653343 | 0.03412727 |            |
| 0.2113236    | 0.05841139  | 0.7997131  | 1.4865170   | 0.1846297  | 0.3618232  |            |            |
| 0.3715840    | 0.1193132   | 0.02838869 | 0.1926114   | 0.06059607 | 0.01592488 |            |            |
| 0.02028743   | 5.2986790   | 2.773225   | 0.1526568   | 0.04104373 | 0.3781249  |            |            |
| 0.1583411    | 0.4593324   | 1.1371850  | 0.09396459  | 0.4575279  | 0.05526535 |            |            |
| 0.2224191    | 1.8499090   | 0.06540255 | 5.1104266   | 6.51774    | 0.2491094  | 0.1904448  |            |
| 0.09134362   | 0.9589658   | 0.03337251 | 0.1237914   | 3.0246010  | 0.09114079 |            |            |
| 0.09827515   |             |            |             |            |            |            |            |
| TCGA-2F-A9KW | 254         | 1          | 0.07013194  | 0.2624923  | 0.0635851  | 0.1946127  |            |
| 0.08072004   | 32.709360   | 0.1401740  | 3.199713    | 0.3620646  | 0.06930111 |            |            |
| 0.4611148    | 0.4229791   | 0.9099734  | 0.08527285  | 0.1056757  | 0.04150546 | 0          |            |
| 1.6421750    | 10.44612    | 0.0863256  | 0.1441262   | 1.90970129 | 4.28780    | 0.02421601 |            |
| 0.03769791   | 0.3228802   | 0.0629412  | 0.1109901   | 0.5581214  | 0.1161765  |            |            |
| 0.04384792   | 0.1883468   | 0.4459511  | 0.1821375   | 0.1121584  | 0.3038098  |            |            |
| 0.1157604    | 0.1423631   | 0.07338667 | 0.1448682   | 0.1635643  | 0.09057112 | 0          |            |
| 0.6045416    | 0.05561918  | 0.03301696 | 0.02177038  | 0.1412601  | 0.9140357  |            |            |
| 3.4794590    | 13.99349    | 0.81071    | 0.3254970   | 0.4033045  | 0.08991599 | 0.05000482 |            |
| 1.0359070    | 0.05905409  | 0.2740668  | 0           | 0.01264715 | 0.1262494  | 0.05256189 |            |
| 0.2034515    | 5.6066410   | 0.04664498 | 0.1127518   | 0.08358459 | 0.1668575  |            |            |

|              |             |             |             |             |             |             |
|--------------|-------------|-------------|-------------|-------------|-------------|-------------|
| 0.7285501    | 11.354620   | 0.09944709  | 0.05455134  | 0.007318744 | 0.1395609   |             |
| 0.1925776    | 0.03965195  | 0.4935984   | 0.06665354  | 0.3167105   | 0.0268196   |             |
| 0.2720851    | 0.1280906   | 0.2229755   | 0.09057112  | 0.2549925   | 0           | 0           |
| 0.1423578    | 0.05482199  | 0.03577748  | 0.2353044   | 0.09040644  | 0.070231    |             |
| 0.2038779    | 0.4569191   | 0.02884674  | 0           | 0           | 0.1694158   | 0.5808825   |
| 0.1598828    | 0.1366031   | 0.07175115  | 0.4846349   | 0.03965195  | 0.6787658   |             |
| 0.2770114    | 0           | 0.04423803  | 3.2067540   | 0.3518175   | 0.0372461   | 0.05905409  |
| 0.2063218    | 0.09399536  | 0.4272870   | 0.7248330   | 0.1245164   | 0.1398757   |             |
| 1.512061     | 0.1981018   | 0.2198535   | 0.1130081   | 0.4845705   | 0.03699668  |             |
| 0.6193324    | 0.2975733   | 0.1381210   | 0.4109384   | 1.0189250   | 0.08826115  | 0.2302016   |
| 0            | 0.06034411  | 0.4587043   | 0.9574099   | 0.1476937   | 0.07661563  | 0.3047853   |
| 0.05346618   | 1.0602040   | 0.3366197   | 0.2501184   | 0.1982597   | 0.7500608   | 0           |
| 0.9562220    | 0.2697480   | 1.0389992   | 0.0228740   | 0.09636346  | 0.07943058  | 0.08831891  |
| 1.8565610    | 0.6302552   | 0.1171620   | 0.3766935   | 0.5597397   | 0.2473808   | 0.1002491   |
| 0.2745472    | 0.3244407   | 0.2200157   | 0.3570811   | 0.02647686  | 0           | 0.4467524   |
| 0.1064744    | 0.2782090   | 0.4961329   | 0.1590871   | 0.08470791  | 0.4963330   | 0.07210229  |
| 0.4725191    | 0.7649776   | 0.04463514  | 0.0379569   | 0.1691277   | 0.3539042   |             |
| 0.4827529    | 1.02927     | 0           | 0.4021036   | 0.6065312   | 0.1355393   | 0.1305461   |
| 0.3642751    | 1.6532660   | 0.07579809  | 0.07119184  | 0.1699727   | 0.06231021  |             |
| 0.2219182    | 0.04377073  | 0.8904311   | 0           | 0.04982319  | 0.2865910   | 0.5646028   |
| 0.5823478    | 0.3783313   | 0.09057112  | 0.08183599  | 1.39202     | 0.1105582   |             |
| 0.2597886    | 0.3439303   | 0           | 0.4338878   | 0.06542572  | 0.1538975   | 0.3641538   |
| 0.1074716    | 0.1102518   | 0           | 0.04717604  | 3.3884351   | 0.0909510   | 0.4066811   |
| 0.06318112   | 0.09636346  | 0.09171266  | 0.3111257   | 2.1533820   | 0.02572351  |             |
| 0.2075456    | 1.22271     | 0.06399427  | 0.07252559  | 0.06629806  | 0.1665780   | 0.1357141   |
| 0.3527355    | 0.1636839   | 1.3447250   | 0.3046945   | 0.3570811   | 0.03592742  |             |
| 2.6443370    | 0.07042995  | 0.9711635   | 0.2418510   | 0.06898064  | 0.3076260   | 0.154902    |
| 0.04312536   | 0           | 0.3501658   | 0.06134165  | 0.134322    |             |             |
| TCGA-GU-A762 | 232         | 1           | 0           | 0.046474066 | 0           | 0.107196542 |
| 73.044717822 | 0.100941216 | 0.063172334 | 0.26436985  | 0           | 0.085887961 |             |
| 0.989988383  | 0.232985301 | 0.671292071 | 0.039141649 | 0.256801317 | 0.068586101 |             |
| 0.027180334  | 0.189322925 | 0.025892694 | 0.071324783 | 0.238162752 | 1.721888232 |             |
| 48.805244534 | 0.21341857  | 0.342618516 | 1.06709285  | 0.052003892 | 0           |             |
| 0.733626335  | 1.199856155 | 0.036228461 | 0           | 0.153524196 | 0.046303832 | 0.108113355 |
| 0.125508375  | 0.183932104 | 0.10693148  | 0.067371392 | 0.067225657 | 0.090094462 |             |
| 0.074832559  | 1.910061387 | 1.227913581 | 0.045954222 | 0.054559196 | 0.080943011 |             |
| 0.875349604  | 0.226561074 | 3.427684765 | 0           | 0.29770344  | 0.307354674 | 0           |
| 0.376218633  | 0           | 0.082630949 | 0.47549855  | 0.102707687 | 0           | 0.226442144 |
| 0.014629236  | 0.115901095 | 0.130284592 | 0.437053987 | 0.374333255 | 0.019269735 |             |
| 0.0931589    | 0.053713396 | 0.243910872 | 0.263353043 | 0.400159819 | 0.082166149 |             |
| 0.123947839  | 0.006046964 | 0.082363823 | 0.111379366 | 0.065523245 | 0.128787068 |             |
| 0.055071146  | 0.235508072 | 0           | 0.056201197 | 0.120951152 | 0           | 0           |
| 0.143647114  | 0           | 0.033605787 | 0           | 0.065032929 | 0.266042327 | 0.186741249 |
| 0.171569409  | 0.421934281 | 0.102145884 | 0.029727261 | 0           | 0.069988202 | 1.487821632 |

|                    |                            |                   |                    |                            |                   |             |             |
|--------------------|----------------------------|-------------------|--------------------|----------------------------|-------------------|-------------|-------------|
| 0.561424655        | 0                          | 0.023713174       | 0.266946555        | 0                          | 0.260844919       | 0           | 0.042617297 |
| 0.073101556        | 1.340343106                | 0.047994246       | 0.484470221        | 0.041031785                | 0.04879225        |             |             |
| 0.213086487        | 0.11649265                 | 0.323617473       | 0                  | 0.079005913                | 0.034293051       | 0.048464607 |             |
| 1.117171331        | 0                          | 0.726598227       | 0                  | 0.696091964                | 0.061135528       | 0.073101556 |             |
| 0.118966433        | 0                          | 0.667741435       | 0                  | 0.072923993                | 0                 | 0           | 0.075799031 |
| 0.625177224        | 0                          | 0.126604236       | 0.035974671        | 0.044175349                | 0.131395761       | 0.516518348 |             |
| 0                  | 0.065523245                | 0.216650995       | 0.106709285        | 0.197514782                | 0                 | 0.111436912 | 0           |
| 0.551862198        | 0.460072928                | 0                 | 0.098441872        | 0.145943427                | 0.466853122       | 0.080438831 |             |
| 0.24523356         | 0.038904427                | 0.308315758       | 0.102196703        | 0.035498048                | 0.02520434        |             |             |
| 0.486483969        | 0.060594506                | 0.036878882       | 0.204175735        | 0.13382109                 | 0.719784328       |             |             |
| 0.043986161        | 0.062690348                | 0.273279876       | 0.430839213        | 0.104982303                | 0.037280467       |             |             |
| 0.029786532        | 0.504528988                | 0.270877416       | 0                  | 0.125444503                | 1.886467718       | 0.036550778 |             |
| 0.249290502        | 0.708677977                | 0.057646971       | 0.194476093        | 0.243124476                | 0.047994246       |             |             |
| 0.071907365        | 0.11286559                 | 0.138326851       | 0                  | 0.026142587                | 0.102626666       | 0           |             |
| 0.064938379        | 0                          | 0.096802721       | 0.067793853        | 0.041165406                | 0                 | 0.3162955   |             |
| 0.333106011        | 0.312588612                | 0.299330235       | 0.027046132        | 0.742018207                | 0.09134647        |             |             |
| 0.064393534        | 0.051391631                | 0                 | 0.035849105        | 0                          | 0.442013921       | 0.246170221 |             |
| 0.029598757        | 0                          | 0.188023225       | 0                  | 0.049260281                | 0.832039623       | 0.056124419 | 0           |
| 0.074291274        | 0.078303192                | 0                 | 0.037887865        | 0                          | 0                 | 0.042507061 | 0           |
| 0.026436985        | 0.035953683                | 0.602551763       | 0.137631741        | 0.081941887                | 0.08709719        |             |             |
| 0.120213825        | 0.025838412                | 0                 | 0.149977326        | 1.36451864                 | 0.059368605       | 1.224124807 |             |
| 0.640104564        | 0.601802853                | 2.495815142       | 0.042745396        | 0.55455219                 | 0                 | 0.191976985 |             |
| 0.204880902        | 0.055071146                | 0.399533591       | 0.010136461        | 0.100891637                |                   |             |             |
| TCGA-XF-AAME       | 2828                       | 1                 | 0.09226692         | 0.08457304                 | 0                 | 0.1950752   | 0.7484348   |
| 45.5225            | 1.0562280.3448811          |                   | 0.2886586          | 0.5443876                  | 0.1172235         | 4.364739    |             |
| 0.3533203          | 0.6596697                  | 0.1851969         | 0.3318004          | 0.3120307                  | 0.0494625         |             |             |
| 1.9810360.02355963 |                            | 0.02163269        | 0.05417577         | 1.85863938.920390.09102585 |                   |             |             |
| 0.3542578          | 0.4247873                  | 0.09463616        | 4.0051380.8582438  | 1.2664220.1318564          |                   |             |             |
| 0.2831915          | 0.6425781                  | 0.8584318         | 0.08431868         | 0.7993961                  | 0.1071097         |             |             |
| 0.7102638          | 0.1348620.1104013          |                   | 0.0819765          | 0.1361795                  | 0.8537324         |             |             |
| 1.9694290.04181352 |                            | 0.1737510.6955799 | 0.5309841          | 0.2748624                  | 4.376427          |             |             |
| 0.07013374         | 0.9819359                  | 0.8389814         | 0.07026557         | 0.7042                     | 0.1013959         |             |             |
| 0.6050082          | 0.6922460.2336330.04439582 |                   | 0.3826431          | 1.6141921.188488           |                   |             |             |
| 0.1792783          | 0.1185453                  | 0.5200342         | 2.0436240.02922239 | 0.2472307                  |                   |             |             |
| 0.9285974          | 0.2798289                  | 0.9584944         | 1.1327660.1246043  | 0.6869298                  |                   |             |             |
| 1.1664460.1199079  |                            | 0.6225388         | 0.05961927         | 0.1367132                  | 0.1503269         |             |             |
| 0.3571460          | 0.1022744                  | 0.4126982         | 0.1676291          | 0.06808977                 | 0.1916989         | 0           |             |
| 0                  | 0.08408878                 | 0.1236426         | 1.1780830.5632796  | 0.6796597                  | 1.583953          |             |             |
| 2.4182880.7072135  |                            | 0.1022362         | 0.08114606         | 0.04063183                 | 6.2089870.9607339 |             |             |
| 0.4807882          | 0.4107833                  | 0.1941885         | 0.2550380.05961927 | 0.48655                    | 0.1041261         |             |             |
| 0.1163318          | 0                          | 2.31624           | 0                  | 0.3085719                  | 0.0513351         | 0.08879165  | 0.07755453  |
| 0.1413281          | 1.6358770.5994083          |                   | 0.6469838          | 0.03120307                 | 0.1322931         |             |             |
| 0.9290670.06382689 |                            | 0.9641451         | 0.04247873         | 1.6393120.08344036         | 10.11024          |             |             |
| 0.1659787          | 0                          | 0.5457873         | 0.05106733         | 0.2549359                  | 0.0692246         | 0.2283324   |             |



|              |              |             |              |             |             |             |
|--------------|--------------|-------------|--------------|-------------|-------------|-------------|
| 0.2268282    | 0.1724229    | 0.7545911   | 0            | 0.2303931   | 0.2945986   | 0.8440935   |
| 0            | 0.3615211    | 0.03760692  | 0.08942891   | 0.2246361   | 0.1941885   | 0.2516048   |
| 0.04696141   | 0.06759726   | 0.06961133  | 2.0085471    | 3.932130    | 2.414812    | 0.2090008   |
| 0.2987847    | 0.6068390    | 3.0432      | 3.8755340    | 2.831915    | 0.7013374   | 0           |
| 0.236863     | 0.5962659    | 0.5149186   | 0.02756732   | 0.03355591  | 0.3980967   | 0.1339395   |
| 1.6960960    | 1.200684     | 0.2091527   | 0.4558693    | 0.2325533   | 0.2547277   |             |
| 0.1017639    | 0.1727792    | 0.8470905   | 0.8626450    | 0.2684473   | 0.05707066  |             |
| 3.6872690    | 2.660590     | 2.268282    | 0.6954872    | 0.05245269  | 0.4350090   | 0.3747158   |
| 3.8138230    | 1.1526657    | 0.2053917   | 0.5506502    | 0.1424592   | 0.07730778  |             |
| 0.2015031    | 0.09368743   | 0.07820352  | 0.03290606   | 0.2113927   | 0.1850559   |             |
| 0.1123686    | 0.2154541    | 2.2943270   | 2.357378     | 0.4875821   | 3.277510    | 1.845685    |
| 1.2490430    | 0.09350516   | 0.2929568   | 7.3909870    | 3.539894    | 0.06523784  | 0.0491859   |
| 0.7988631    | 0.2675425    | 0.05386352  | 0.2486560    | 0.08554069  | 0.1063983   |             |
| 0.2689301    | 0.6939796    | 0.4596059   | 0.1426767    | 0.6421739   | 0.04749845  | 0           |
| 0.07469362   | 0.1063176    | 0.0735852   | 0            | 0           | 1.3022170   | 0.09621952  |
| 0.02180938   | 0.4984171    | 0.1669739   | 0.07063438   | 0.3078530   | 3.691641    | 0.1410614   |
| 0.0228213    | 0.3070431    | 0.4026709   | 0            | 0.5592623   | 0.6883239   | 0.6570929   |
| 12.556910    | 0.06914457   | 0.9671198   | 0.1109237    | 0.1164526   | 0.3323141   |             |
| 0.02505448   | 0.4763544    | 0.1429583   | 0.1468813    |             |             |             |
| TCGA-XF-AAN0 | 1718         | 1           | 0.110028138  | 0.188259306 | 0.039902788 | 0.33585497  |
| 0.033770541  | 13.869981293 |             | 0.038334128  | 0.991618021 | 0.120478687 | 0.378689077 |
| 0.195704404  | 0.787004975  | 0.235946919 | 0.632237503  | 0.511345709 | 0.09167315  |             |
| 0.026046728  | 0.01032219   | 0.431391428 | 0.104887328  | 0.036115718 | 0.135669478 |             |
| 2.657932637  | 18.27894944  | 0.055721393 | 0.201087058  | 0.709181363 | 0.157994835 | 0           |
| 1.846766162  | 0.182266238  | 0.055033474 | 0.141836273  | 0.746283527 | 0.083527137 |             |
| 0.269808849  | 0.508415152  | 0.195583685 | 0.040609032  | 0.061405011 | 0.125782327 |             |
| 0.179628174  | 0.682054207  | 0.02545186  | 12.614374886 | 0.139615123 | 0.227917516 |             |
| 0.081971926  | 1.241067386  | 0.43020193  | 2.085553088  | 0.23417621  | 1.384959256 |             |
| 0.204265455  | 0            | 0.636815918 | 3.18811007   | 0.075509317 | 1.48074442  | 0           |
| 0.148237435  | 0.540541385  | 0.094557515 | 0.082541813  | 0.243551847 | 0.230896258 |             |
| 0.663914468  | 0.177699203  | 0.004878671 | 0.194582642  | 0.209813836 | 0.483283118 |             |
| 3.514734009  | 3.478365734  | 0.166421227 | 0.136934635  | 0.101043209 | 0.212697538 |             |
| 0.072511185  | 0.049767113  | 0.114121139 | 0.376455523  | 0.536628955 | 0           | 0.170746812 |
| 0.111005326  | 0            | 0.284189253 | 0.48006123   | 0.054552413 | 0           | 0.114861276 |
| 0.118996326  | 0.41967993   | 0.056734509 | 0.308513926  | 0.220347011 | 2.108377026 |             |
| 0.033619405  | 0            | 0.101752109 | 0.106316797  | 3.535965021 | 0.903009067 | 0.142875366 |
| 0.198120508  | 0.760330896  | 0.348369792 | 0.703327803  | 0.282487284 | 0.032369274 |             |
| 0.13880774   | 3.353993802  | 0.255172733 | 0.551957193  | 0.011686884 | 0.111178076 |             |
| 0.356062012  | 0.501387202  | 0.275592121 | 1.137171282  | 0.180022961 | 0.078140184 |             |
| 0.336957679  | 1.277355906  | 0.071039226 | 0.091979307  | 0.709181363 | 0.867353153 |             |
| 0.023217247  | 0.166569288  | 0.13855049  | 0.216694305  | 1.220651558 | 3.410271036 |             |
| 0.212807412  | 0            | 1.007458341 | 0.151475631  | 1.007508579 | 1.143499887 | 0           |
| 0.191267828  | 0.134210667  | 0.465731044 | 0.603558607  | 0.031392334 | 0.099534226 |             |
| 0.386509931  | 0.243147896  | 0.240030615 | 0.156803919  | 0.141066817 | 0.11621594  |             |

|              |             |             |                 |             |             |
|--------------|-------------|-------------|-----------------|-------------|-------------|
| 0.558877253  | 0.565111448 | 0.141103269 | 0.07476992      | 0.526532522 | 1.418362726 |
| 0.344066968  | 0.254886421 | 0.561435246 | 1.63923347      | 0.349298283 | 0.368480178 |
| 1.11604375   | 0.046023569 | 0.112043016 | 0.160616865     | 0.21344742  | 0.686880062 |
| 0.246013067  | 0.48431898  | 0.843051006 | 0.345529591     | 0.537999655 | 0.435509599 |
| 0.506380377  | 0.205740527 | 0.084032262 | 0.619315633     | 0.583747925 | 0.41642322  |
| 0.227213446  | 0.949652915 | 0.029189878 | 0.447236531     | 0.493686157 | 0.413136807 |
| 0.172950881  | 0.257175659 | 0.118196894 | 0.35675282      | 0.134029185 | 0.406152251 |
| 0.234616391  | 0.181334147 | 0.027468292 | 0.455854561     | 0.102983432 | 0.093799539 |
| 0.179850029  | 0.460342586 | 0.787127423 | 1.187107934     | 0.824148834 | 0.123254694 |
| 1.089603154  | 0.234159939 | 0.211939258 | 1.747331035     | 0.147746117 | 0.299514642 |
| 0.041057868  | 0.080481894 | 0.212943272 | 0.112406268     | 0.034594213 | 0.071404989 |
| 0.029605294  | 1.820855746 | 1.270719568 | 0.085256776     | 0.323269149 | 0.056426727 |
| 0.237895654  | 0.181418488 | 0.110312256 | 0.319494676     | 0           | 0           |
| 0.060239344  | 0.100129457 | 1.539396346 | 0.087113289     | 0.117923922 | 0.312955768 |
| 0.273919356  | 0           | 0.038100098 | 0.549222594     | 0.42016131  | 0.157823598 |
| 0.022099136  | 1.249378105 | 3.893528175 | 0.126258879     | 0.07020018  | 0           |
| 0.115019007  | 0.041828391 | 1.935860596 | 0.019247459     | 0.091956719 | 1.388761493 |
| TCGA-CF-A47W | 368         | 0           | 0.02450519      | 0.03930809  | 0.04443524  |
| 0.09401611   | 102.04520   | 0.1335790   | 1.118029        | 0           | 0.01210744  |
| 0.1313737    | 1.2718350   | 0.0926976   | 0.2563012       | 0.05801061  | 0           |
| 0.08043601   | 0           | 1.608669109 | 1.4490.07333257 | 0.05268894  | 0.5640967   |
| 0.04398526   | 0           | 1.1878260   | 0.04059387      | 0           | 0           |
| 0.02612658   | 0.5661647   | 0.1306797   | 0.1808868       | 0.05128488  | 0.03744435  |
| 0.009525317  | 0.1898817   | 0.0850286   | 23.588040       | 0.03886841  | 0.2076595   |
| 0.1293174    | 1.92498     | 0.06387565  | 10.9368         | 0.03259696  | 0.4091745   |
| 0            | 1.9728920   | 0.03141804  | 0.02074855      | 1.6891560   | 0.08253766  |
| 0.05264902   | 0.003535289 | 0.1470450   | 0.03673188      | 0.5687129   | 0           |
| 0.02596067   | 0.08969632  | 0.2227459   | 2.7828770       | 0.06949671  | 0.01906108  |
| 0.09206217   | 0.1114622   | 0.02691584  | 0.1939701       | 0.3630967   | 0.04657957  |
| 0.2655925    | 0           | 0           | 0.1065639       | 0.3116444   | 0.03164695  |
| 0.1104291    | 0.007106003 | 0.09577827  | 0.01250121      | 0.1557834   | 0.08909835  |
| 0.1108148    | 0.3193092   | 0.002879857 | 0               | 0           | 0.03158941  |
| 0.1909250    | 0.1103122   | 0.4402813   | 0               | 0.05919652  | 5.03364     |
| 0.1217816    | 0.3278147   | 0.03470497  | 0.04126883      | 0.2883681   | 1.480436    |
| 0.05529656   | 0.2532679   | 0           | 0               | 0.2426869   | 0           |
| 0.2816742    | 0           | 0.6195443   | 0               | 0.03468529  | 0.8433081   |
| 1.1487060    | 0.2373522   | 0.0844037   | 0               | 0.06064285  | 0.009888547 |
| 2.8705160    | 0           | 0           | 0.03736382      | 0.2222709   | 0.1207472   |
| 0.1619374    | 0           | 0           | 0               | 0.2164044   | 0.1930464   |
| 0.06734177   | 0.05550856  | 0           | 0.3384580       | 0.1933647   | 0.2620046   |
| 0.5215513    | 0           | 0.02001633  | 0.02131801      | 0.9824934   | 0           |
| 0.04317332   | 0.01131868  | 0           | 0               | 0.2209331   | 0.07704735  |
| 0.1479913    | 0           | 0.0409397   | 2.3876790       | 0.15274     | 0.1559621   |
| 0.1772875    | 0.1545745   | 0.1265110   | 0.4623980       | 0.1667738   | 0.2559963   |

|              |             |             |            |            |            |                  |
|--------------|-------------|-------------|------------|------------|------------|------------------|
| 0.2976884    | 0.08109301  | 0.06364168  | 0.2632451  | 0.02648503 | 0.01658369 |                  |
| 0.1964474    | 0.04354431  | 0.07754166  | 0          | 0.3111304  | 0.2867026  | 0                |
| 0.1001394    | 0.2615468   | 0           | 1.3597180  | 0.1265878  | 0.09150324 | 0.3138021        |
| 0.1738384    | 0.09077418  | 0.4270033   | 0.03290564 | 0          | 0          | 0.0307281        |
| 0.1966452    | 0           | 0.1155710   | 0.07951569 | 0.03296808 | 0.1458264  | 0.4937566        |
| 0.01894676   | 0           | 0.06622939  | 0          | 0.02136388 | 0.01976585 | 0                |
| 0.4628367    | 0           | 0           | 0.02910248 | 0.02553417 | 0.1246679  | 0.2796137        |
| 0.1092716    | 0           | 0.1540344   | 0          | 0.02510719 | 0.5373457  | 0.02460932       |
| 1.1537545    | 4.844040    | 0.008034302 | 0          | 0.1031108  | 0.1082503  | 0.04520601       |
| 0.7224675    | 0           | 0.1877367   |            |            |            |                  |
| TCGA-GC-A3I6 | 630         | 1           | 0.04124147 | 0.2058134  | 0.09971082 | 0.4196245        |
| 0.02109682   | 50.632610   | 0.2394775   | 0.3596949  | 0.2759693  | 0.4731424  |                  |
| 0.1494273    | 0.3697651   | 0.4421958   | 0.4586698  | 0.2005806  | 0.08773156 |                  |
| 0.3254335    | 0           | 0.5988776   | 0.1310485  | 0          | 0.1695084  | 1.90119518.69891 |
| 0.4810076    | 0.7241697   | 0.3164524   | 0.1480516  | 0.0870244  | 0.8752168  | 0                |
| 0.5844602    | 0.2953555   | 1.4569110   | 0.2032286  | 0.02931348 | 0.5558218  |                  |
| 0.3141855    | 0.05073781  | 0.03836038  | 0.0949155  | 0.2885546  | 0.1420289  | 0                |
| 3.1995350    | 0.2616573   | 0.1812142   | 0          | 0.2215167  | 0.9316733  | 7.541240.2560118 |
| 2.2954260    | 0.1215303   | 0.1465674   | 0.2754179  | 0          | 0.03063084 | 0.9024753        |
| 0.09260554   | 0.1227935   | 0.02953555  | 0.02181586 | 0.2383064  | 0.0824248  |                  |
| 0.3509462    | 0.04440425  | 0.006095518 | 0.2210144  | 0.3568098  | 0.3220397  |                  |
| 2.0350320    | 0.9282603   | 0.3378867   | 0.1390099  | 0.05164592 | 0.2032198  |                  |
| 0.01509951   | 0.06218012  | 0.5907111   | 0.0522613  | 0.2979893  | 0          | 0.5866707        |
| 0.1817350    | 0.3905795   | 0.3498827   | 0.06815897 | 0.1238991  | 0.1754013  |                  |
| 0.02149224   | 0.008415657 | 0.8302323   | 0.53164    | 0          | 0.6867857  | 1.706995         |
| 0.2229486    | 0           | 0.6356565   | 0.09962589 | 1.2752730  | 0.2193798  | 0.03570232       |
| 0.1293939    | 0.3039917   | 0.2487205   | 0.5693330  | 0.08144902 | 0          | 0.2428012        |
| 1.4691590    | 0.1379255   | 0.06327467  | 0.04630277 | 0.6875289  | 0.2947972  |                  |
| 0.2016352    | 1.0798130   | 0.2998995   | 0.3254335  | 0.2193457  | 2.92972    | 0.1331369        |
| 0.5889699    | 0.2215167   | 0.6130835   | 0.3480976  | 0.06937177 | 0.1128965  |                  |
| 0.1082971    | 1.1814220   | 0.1065217   | 0.1675447  | 0.03609901 | 0.4422601  | 0.4731424        |
| 0.3596581    | 1.2592050   | 0           | 0          | 0.4156389  | 0.9803291  | 0.1176668        |
| 0.6839813    | 0.8128254   | 0.05063238  | 0.9371859  | 0          | 0.1410016  | 0                |
| 0.5237051    | 0.8970746   | 0.02518536  | 0.5605150  | 0.6232369  | 0.3164524  |                  |
| 0.6307655    | 0.2204728   | 0.7753083   | 0.8411815  | 0.3879297  | 0.1122896  | 0                |
| 0.4805059    | 0.02875143  | 0           | 0.2767975  | 0.2412872  | 0.3502869  | 0.0834838        |
| 0.4957647    | 0.9509008   | 0.2979805   | 0.3985036  | 0.3184051  | 0.05653353 |                  |
| 0.4445878    | 0.2998995   | 0.1749862   | 0.1785661  | 0.06630431 | 0.1387435  |                  |
| 0.3311997    | 0.9079017   | 0           | 0.2486346  | 0.8004563  | 0.3036365  | 0.1137308        |
| 0.1785116    | 0.3445815   | 0.1782939   | 0.0806284  | 0.1947809  | 0.3419906  |                  |
| 0.1993753    | 0           | 0.1469818   | 0.3216744  | 0.07813012 | 0.5055942  | 0.2833889        |
| 0.4917271    | 0.0847542   | 1.4557960   | 0.1154978  | 0.8449907  | 0.2492216  |                  |
| 0.0407387    | 0.7458869   | 0.2584361   | 0.3402001  | 0          | 0.03160326 | 0.2011643        |
| 0.02808857   | 0.08644553  | 0.08921495  | 0.0739790  | 0.7012038  | 2.5449330  | 0.05326084       |

|              |            |            |            |            |            |            |
|--------------|------------|------------|------------|------------|------------|------------|
| 0.4038995    | 0.07050078 | 0.1238467  | 0          | 0.1378265  | 0.4878911  | 0          |
| 0.1210148    | 0          | 1.4380430  | 0.07961159 | 1.1436170  | 0.2394507  | 0.1596148  |
| 0.4704881    | 0.5276212  | 0.1471205  | 0.1428093  | 0.2338199  | 1.819857   |            |
| 0.2816975    | 1.48517    | 0.05522228 | 2.0559522  | 1.14788    | 0.09465036 | 0.2192741  |
| 0.05784411   | 0.1821819  | 0.06762694 | 0.02613065 | 0.8367417  | 0.2068145  |            |
| 0.1819135    |            |            |            |            |            |            |
| TCGA-FD-A6TA | 1912       | 0          | 0.1408469  | 0.1694465  | 0.1276988  | 0.2117068  |
| 0.4052779    | 44.075730  | 0.06133935 | 0.1279606  | 0.1606507  | 0.1211899  |            |
| 0.03479459   | 1.6767350  | 0.3775443  | 0.6200487  | 0.04757073 | 0.3870077  |            |
| 0.04167799   | 0.04955035 | 0.9970707  | 0.05244772 | 0.2022637  | 0.07236266 |            |
| 1.46806836   | 942320     | 0.09726669 | 0.1324911  | 0          | 0.1264057  | 0.5572571  |
| 1.2227810    | 1.166594   | 0.04403019 | 0.03782593 | 0.3731707  | 0.1266194  |            |
| 0.1126246    | 0.4576091  | 0.2682498  | 0.1299590  | 0.06550375 | 0.1175720  | 0.08212209 |
| 0            | 0.04072613 | 2.0993970  | 0.1657710  | 0.1093044  | 0.8510835  | 0.4589176  |
| 2.5308540    | 1.873555   | 0.7236266  | 0.2801572  | 0.09385382 | 0.3265976  | 0          |
| 0.1569146    | 0.5778962  | 0          | 0.4150970  | 0.4324666  | 0          | 0.2260551  |
| 0            | 0.1634378  | 0.5686815  | 0          | 0.08491536 | 0.2517961  | 0.2448824  |
| 0.8687495    | 2.5937780  | 0.1331473  | 0.1917233  | 0.09553916 | 0.06006043 |            |
| 0.1160269    | 0.03981677 | 0.7304318  | 0.1338612  | 0.3180270  | 0.06830401 |            |
| 0.06124906   | 0.1119512  | 0.1364214  | 0.3200656  | 0.1745812  | 0.1057844  |            |
| 0.1531602    | 0          | 0.1472974  | 0.3544238  | 0.3177379  | 0.4936605  | 0.6937914  |
| 0.9716154    | 0.1613856  | 0.2890317  | 0          | 1.10578    | 0.4666377  | 0.521779   |
| 0.5029602    | 0.2017383  | 0.3082113  | 0.07963355 | 0.2536139  | 0.2086221  | 0          |
| 0.2221096    | 1.5027060  | 1.166594   | 0.23552    | 0.01870046 | 0          | 0.4661536  |
| 0.5191234    | 0.7786701  | 0.4367076  | 0.2880590  | 0.04167799 | 0.1676423  |            |
| 1.7227390    | 0.07104473 | 0.3679457  | 0.0567389  | 0.6192897  | 0.07430094 |            |
| 1.1993920    | 1.735027   | 0.1386951  | 0.7565187  | 1.97811    | 0.1539329  | 0.0462317  |
| 0.2178457    | 0.06059494 | 0.1842444  | 0.7443016  | 0.04943587 | 0.03846705 |            |
| 0.1748870    | 1.073768   | 0.2129221  | 0.5311727  | 0          | 0.1194503  | 0.4470085  |
| 0.1296889    | 0.09601968 | 0.1254528  | 0          | 0.04648998 | 0.7452274  | 0.3931514  |
| 0.1612734    | 0.4386842  | 0.5764592  | 0.8105557  | 0.2881382  | 0.9882516  |            |
| 0.2364121    | 0.7962608  | 0.06210228 | 0.2300932  | 0.06126409 | 0.2051266  |            |
| 0.1104651    | 0.08964135 | 0.1329346  | 0.04879176 | 0.4037485  | 0.106917   |            |
| 0.1396827    | 0.05535503 | 0.7366174  | 0.17012    | 0.1359262  | 0.1357538  |            |
| 0.7883721    | 0.2743419  | 0.08964135 | 0.3049175  | 0.5094922  | 0.3553753  |            |
| 0.3029747    | 0.4614056  | 0          | 0.6302830  | 0.2954809  | 1.0888210  | 1.747849   |
| 0.3200656    | 0.4413026  | 0.4566790  | 1.032601   | 0.2363251  | 0.06256922 |            |
| 0.04410388   | 0          | 0.5882450  | 0.08239312 | 0.1000606  | 0.2158367  | 0.579835   |
| 0.04498219   | 0.2170880  | 0.8185284  | 0.2300932  | 0.4358750  | 0.04163166 | 0.1304343  |
| 1.4916610    | 1.1418473  | 0.1307074  | 0          | 0.3385101  | 0.2160762  | 0.2158367  |
| 0            | 0.04737214 | 1.0676530  | 0.5110455  | 0.2046321  | 0.05444955 | 0          |
| 0            | 0.1688388  | 0.08520518 | 0          | 0.03874565 | 0.3948788  | 2.1486370  |
| 0.1019579    | 0.1331473  | 0.1672705  | 0.1467611  | 0.3379166  | 0.4017795  |            |
| 0.06280533   | 0.06096488 | 0.6184318  | 0          | 0.07215352 | 0.4708031  | 0.601143   |

|              |              |             |             |             |             |             |
|--------------|--------------|-------------|-------------|-------------|-------------|-------------|
| 0.4875999    | 6.3044730    | 0.0923565   | 0.2246580   | 0.07408047  | 0.1555459   | 0.01082616  |
| 0.0334653    | 0.2009265    | 0.006159664 | 0.2207132   |             |             |             |
| TCGA-DK-A1A7 | 560          | 0           | 0.113651088 | 0.157997297 | 0.041216686 | 0.252300968 |
| 0.06976504   | 23.041965162 |             | 0.039596374 | 0.272587854 | 0.228150537 | 0.078231671 |
| 0.01123047   | 0.418913727  | 0.365574086 | 0.800519639 | 0.036849979 | 0.165206825 |             |
| 0.080713143  | 0.063972442  | 0.024755337 | 0.108341004 | 0.037304917 | 0           | 2.468081444 |
| 29.12458907  | 0.094182804  | 0.024436276 | 0           | 0.081598604 | 0           | 0.559116966 |
| 0.024417764  | 0.144535644  | 0.476796577 | 0.024234172 | 0.393866989 | 0.075037398 |             |
| 0.062919278  | 0.026427885  | 0.034732164 | 0.035341501 | 0.058709378 | 0.262899255 |             |
| 4.457540766  | 0.180265373  | 0.085608097 | 0.014111843 | 0.366266462 | 0.08887348  |             |
| 5.069898915  | 0.181415283  | 0.32114668  | 0.221038613 | 0           | 0.910778768 | 2.739381709 |
| 0.014181027  | 0.820708182  | 0           | 0.267957411 | 0.583719148 | 0.097671056 | 0.047548683 |
| 0.100022363  | 0            | 0.685775503 | 0.293680625 | 0.025196567 | 0.060905988 | 0.084280964 |
| 0.024959821  | 0.265643807  | 0.383707722 | 0.021487632 | 0.017680444 | 0.056929259 |             |
| 0.103388769  | 0.062415663  | 0.128514548 | 0.101039024 | 0           | 0.020529585 | 0.817086346 |
| 0.022046134  | 0.0909376    | 0.072267822 | 0.088064067 | 0.08264474  | 0           | 0.034143484 |
| 0.013182597  | 0.159913472  | 0.020872286 | 0.37329075  | 0.087903951 | 0           | 0.205576438 |
| 0.452982521  | 0.005342524  | 0           | 0           | 0.082363157 | 0.866031914 | 0.621828591 |
| 0.088547936  | 0.037208021  | 0.261788894 | 0.128514548 | 0.22510853  | 0.157117089 |             |
| 0.066870225  | 0.114702664  | 2.070507827 | 0.075307123 | 0.836193242 | 0.020119506 |             |
| 0.07655926   | 1.136793831  | 0.060929014 | 0.184648655 | 0           | 0           | 0.099443671 |
| 0.942440018  | 0.027516888  | 0.237519887 | 0.109879938 | 0.27484181  | 0           | 0.14337833  |
| 0.149334897  | 0.044765901  | 1.829112511 | 0.044032034 | 0.009033478 | 0.268595405 |             |
| 0.056250347  | 0.078231671  | 0.356805704 | 1.811767764 | 0           | 0           | 0.034361886 |
| 0.280544524  | 0.032426005  | 0           | 0.122538007 | 0.041859024 | 0.340909553 | 0           |
| 0.466277738  | 0.03001066   | 0.721599596 | 0.707794716 | 0.062464048 | 0.102975874 |             |
| 0.228997859  | 1.726684747  | 0.225859285 | 0.096198166 | 0.06104441  | 0.483774088 |             |
| 0.080177733  | 0.111399016  | 0.158191159 | 0.288198066 | 0.118847524 | 0.028933078 |             |
| 0.034325291  | 0.157482648  | 0.04343861  | 0           | 0.090169363 | 0.285866507 | 0.183328538 |
| 0.109817542  | 0.058496277  | 0.108080805 | 0.603161612 | 0.035419174 | 0.057866156 | 0           |
| 0.054815389  | 0.229405328  | 0.078231671 | 0.329621764 | 0           | 0.250053316 | 0.630615299 |
| 0.414189176  | 0.037609625  | 0.029515979 | 0.108523396 | 0.122833265 | 0.051274974 |             |
| 0.20340646   | 0.040390286  | 0.061436048 | 0.028372754 | 0.258216129 | 0           | 0.129184163 |
| 0.232215048  | 0.245374899  | 0.058074682 | 0.385376016 | 0.205482824 | 0.212188602 |             |
| 0.882920477  | 0.179163139  | 0.101039024 | 1.32815388  | 0.06104441  | 0.056250347 |             |
| 0.169639203  | 0.052254375  | 0.316520551 | 0.092886019 | 0           | 0           | 0.091740366 |
| 0.244763199  | 0.319366488  | 0           | 0.035148799 | 0           | 0.12286448  | 0.062464048 |
| 0.039632891  | 0.073336629  | 0.063447733 | 0           | 0.127453004 | 2.014465539 | 0.165927663 |
| 0.009402406  | 0            | 0.224954276 | 0.040602287 | 0.173456915 | 0.141469416 | 0.202713513 |
| 0.059031957  | 0.407620667  | 0.057866156 | 0.232886189 | 0.737506116 | 0.022826805 |             |
| 3.462362644  | 3.906551396  | 0.055892685 | 0.163151315 | 0.04782114  | 0.401637989 |             |
| 0.090851872  | 0.064808543  | 0.497198738 | 0.007952492 | 0.047492311 |             |             |
| TCGA-FD-A3SR | 602          | 1           | 0.3268885   | 0.1823836   | 0.05154319  | 0.3286593   |
| 0.80700826   | 90.1130      | 1.485508    | 0.2375848   | 0.1296872   | 1.0761520   | 1.710362    |

|                   |                           |                                           |                                   |                           |                            |
|-------------------|---------------------------|-------------------------------------------|-----------------------------------|---------------------------|----------------------------|
| 0.26668           | 0.6322632                 | 0.3532987                                 | 0.2469099                         | 0.06729011                | 0.1400004                  |
| 0.8358548         | 0.00846781                | 0.04665136                                | 0.3504937                         | 1.71825756                | 6.13760.1112362            |
| 0.07639647        | 0                         | 0                                         | 1.1696160.9459754                 | 0.4708736                 | 0.1421756                  |
| 0.09160631        | 0.3614958                 | 0.5735396                                 | 0.09091754                        | 0.5746384                 | 0.3753496                  |
| 0.1258931         | 0.03304918                | 0.2187788                                 | 0.1657351                         | 0.6607668                 | 0.09862996                 |
| 4.145023          | 0.4959447                 | 0.2141130.1676508                         | 0.4007776                         | 2.5932672.5914940.4159236 | 1.6064290.1633379          |
| 0.1515292         | 0.3058337                 | 1.0204250.1697394                         | 0.6997704                         | 0                         | 0.3350920.2539010.1526772  |
| 0.4961970.2008895 | 0.1704303                 | 0.4287955                                 | 0.2754449                         | 0.006301872               | 0.1827972                  |
| 0.4065308         | 0.3745596                 | 1.660994                                  | 8.2445680.1074847                 | 0.1105507                 | 0.4093564                  |
| 0.3070685         | 0.1092748                 | 0                                         | 0.5264730.3241832                 | 1.3350020.1739235         | 0.1654177                  |
| 0.1334989         | 0                         | 0.1468371                                 | 0.6717796                         | 0.07046639                | 0                          |
| 0.1071550.0666595 | 0.2494159                 | 0.6224210.4763528                         | 0.3985133                         | 0.9365128                 | 1.2854590.3908414          |
| 0.2333243         | 0                         | 2.7466291.5538831.03683                   | 0.3691097                         | 0.3373439                 | 0.4321389                  |
| 0.9642769         | 2.0089410.1122751         | 0.04181201                                | 0.07172024                        | 2.5790630.04708736        | 0.4277842                  |
| 0.005032057       | 0.3350920.3344961         | 0.2285829                                 | 0.5067211                         | 0.4112936                 | 0                          |
| 0.06729011        | 0.1207009                 | 1.3199880.09176272                        | 0.4009886                         | 0.5496379                 | 0.8882667                  |
| 0.02999016        | 2.97639                   | 0.8403729                                 | 0                                 | 1.5323242.3677480.16192   | 0.07464218                 |
| 0.7386059         | 0.1467483.0490370.7510579 | 0.2793539                                 | 0.1242119                         | 0.0352949                 | 0.08668124                 |
| 0.2578259         | 0.07796282                | 0.04055008                                | 0.09642769                        | 0.9046039                 | 0.3140788                  |
| 0.2325391         | 0                         | 0.2186624                                 | 0                                 | 0.3609562                 | 0.4231683                  |
| 4.1139990.1287756 | 0.2505750.3271654         | 0.5690466                                 | 1.133351                          | 0.4580316                 | 0.9830921                  |
| 0.05013281        | 0.3250546                 | 0.1236404                                 | 1.081211                          | 0.1783486                 | 0.2170922                  |
| 0.1717009         | 0.07877546                | 1.3580450                                 | 0.2870269                         | 0.9384061                 | 0.4155338                  |
| 0.2746629         | 0.4389123                 | 0.2484014                                 | 1.202132                          | 0.2657590.07236405        | 0                          |
| 0.7540383         | 0.2510209                 | 0.24458                                   | 2.0957930                         | 0.6413044                 | 0.3991734                  |
| 0.5493525         | 0.2116459                 | 0.1107329                                 | 0.2883902                         | 0.3072163                 | 0.1410673                  |
| 0.3815524         | 0.5050974                 | 0.1667737                                 | 0                                 | 3.969895                  | 0.2660513                  |
| 0.2323157         | 0.7749303                 | 0.6173110.5257406                         | 1.5784990.2388157                 | 0.6915973                 | 0.1120255                  |
| 0.1684714         | 2.0702080.07633859        | 0.3165454                                 | 0.05303523                        | 0.4306914                 | 0.2281009                  |
| 0.08711839        | 0.044686                  | 0.1844704                                 | 0.2676921                         | 1.0229741.1235340.0550639 | 0.1758202                  |
| 0.03644374        | 0.3072944                 | 0.07811391                                | 0.1486878                         | 0.04585526                | 0.07934405                 |
| 0.01042596        | 0                         | 3.6342180.02593744                        | 0.2116459                         | 0.8598779                 | 0.1575363                  |
| 0.1353996         | 0.5159951                 | 0.4422836                                 | 0.1014007                         | 0.04921462                | 0.3205624                  |
| 0.1085461         | 0.05824679                | 1.4543680.2283671.5744835.1013640.1164936 | 0.1360184                         | 0                         | 0.1255663                  |
| 0.03495818        | 0                         | 0.5406677                                 | 0.009944924                       | 0.1088837                 | TCGA-GU-AATP               |
| 1003              | 0                         | 0.06275813                                | 0.2237079                         | 0.2275985                 | 0.232201                   |
| 0.03210354        | 25.3391                   | 0                                         | 0.06081737                        | 0.4199491                 | 0                          |
| 0.02067155        | 0.9878166                 | 0.33645                                   | 1.5898180.06782852                | 0.3003822                 | 0.09904399                 |
| 0.02943798        | 0.2278316                 | 0.07478237                                | 0.2403307                         | 0.1719633                 | 26.5720327.327180.04815531 |
| 0.1574266         | 0.1926213                 | 0                                         | 0.2648542                         | 2.0280270.5544612         | 0.2092675                  |
| 0                 | 0.3547226                 | 0.1588081                                 | 0.06691054                        | 0.6645630.1806169         | 0.1389761                  |
| 0.1070188         | 0.07813707                | 0.09757787                                | 0.2701610.14517320.166490.3318084 | 0.157576                  |                            |

|              |             |            |            |            |            |
|--------------|-------------|------------|------------|------------|------------|
| 0.0129876    | 0.6741744   | 0.4907593  | 2.10236    | 0.1669625  | 0.2149542  |
| 0.4808326    | 0.1115176   | 1.5522590  | 0.06525635 | 3.5706270  | 0.1409201  |
| 1.0277180    | 0.08988992  | 0.04526962 | 0.4797961  | 0.0627139  | 0.2427469  |
| 0.2027130    | 0.009275695 | 0.04484304 | 0.06648563 | 0.2756562  | 0.5976198  |
| 4.9439460    | 0.1186547   | 0.1464471  | 0.05239389 | 0.1903042  | 0.1148864  |
| 0.04731048   | 0.1859791   | 0.07952728 | 0.4534574  | 0          | 0.04057958 |
| 0.2660419    | 0           | 0.0760607  | 0          | 0.06284677 | 0.02426476 |
| 0.2364228    | 0.05393395  | 0          | 0.2837982  | 0.4168949  | 0.7768706  |
| 0.2526718    | 6.6535340   | 0.9538159  | 0.05432907 | 0.1027313  | 1.3106760  |
| 0.3578475    | 0.1239429   | 0.06154289 | 0.05278234 | 3.3309740  | 0.06930765 |
| 0.6996149    | 0           | 0.4227602  | 0.6769718  | 0.5046750  | 0.5617405  |
| 0.1485660    | 0.2853312   | 0.7632758  | 0.05064941 | 1.5301820  | 0.06741744 |
| 0.1324271    | 0.5278234   | 0.4352199  | 0.08239909 | 1.2911460  | 0.4862897  |
| 0.1551911    | 0           | 0.2070763  | 0.1439984  | 0.7662204  | 1.2897250  |
| 0.1039008    | 0           | 0.3162439  | 1.4344140  | 0.05968546 | 0          |
| 0.4563642    | 0.1490637   | 0.2682068  | 0          | 1.5053210  | 0.3685251  |
| 0.04738606   | 0.5795744   | 1.7335910  | 0.2567754  | 0.4566510  | 0.2809060  |
| 0.07379023   | 0.05126211  | 0.03639715 | 0.6164997  | 0.3500139  | 0.1597684  |
| 0.06318141   | 0           | 0.39978    | 0.06351964 | 0.2414134  | 0.5261849  |
| 0.4548093    | 0.8613771   | 0.1290426  | 1.7780860  | 0.3259744  | 0.1065123  |
| 0.0905761    | 1.1098650   | 0.05278234 | 0.3599960  | 0.4605252  | 0          |
| 0.5082561    | 0.06922678  | 0.05432907 | 0.3495719  | 0.4069711  | 0.08494211 |
| 0.2262021    | 0.07434505  | 0.06067883 | 0.05222478 | 2.7399060  | 0.05944624 |
| 0.4274305    | 0.6711008   | 0.05344806 | 0.8383212  | 0.2701610  | 0.1366990  |
| 0.1978678    | 0.1549826   | 0.9167581  | 0.1685436  | 0          | 0          |
| 0.3061165    | 0.08548609  | 0.06577311 | 0.06788026 | 0.05628781 | 0.2015517  |
| 0.8462416    | 0.2431449   | 0.06469722 | 0          | 0.1884604  | 0          |
| 0.03374707   | 0           | 0          | 0.1563992  | 1.275180   | 0.03817719 |
| 0.1490637    | 0.07473527  | 0.4595644  | 0.4556965  | 0.1119384  | 0.07243876 |
| 0.5105091    | 0           | 0          | 1.6334790  | 2.1436645  | 0.4239120  |
| 0.2772306    | 0.06431846  | 0.07952728 | 0.6764352  | 0          | 0.1165567  |
| TCGA-DK-AA6X | 467         | 0          | 0.4040916  | 0.3745111  | 0.2930956  |
| 0.08268426   | 54.072850   | 0.4699144  | 0.7374542  | 0.5563125  | 0.4259248  |
| 1.2076761    | 1.2276030   | 0.7490221  | 0.6259929  | 0.2196782  | 0.06377317 |
| 0.4694332    | 0.09630284  | 0.08842622 | 0.1107254  | 0.36485938 | 0.652510   |
| 0.20273      | 0.3720792   | 0.09670918 | 0          | 2.2218440  | 0.1785053  |
| 0.05787898   | 1.71301     | 0.2690908  | 0.3733847  | 1.0114090  | 0.3967778  |
| 0.03758622   | 0.1311147   | 0.1675444  | 0.2087439  | 0.1246334  | 8.39861    |
| 0.0854589    | 0.2029223   | 0          | 0.7596616  | 0.8426499  | 2.2504260  |
| 1.7992810    | 0.1667088   | 0.1436095  | 1.0394590  | 0.1512639  | 1.2379670  |
| 0            | 0.3609461   | 0.1157580  | 0.1204806  | 0.3592263  | 0.5653296  |
| 0.5220974    | 0.01194501  | 0.3464864  | 0.3710136  | 0.5916385  | 1.399272   |
| 7.1935310    | 0.6621355   | 0.1047727  | 0.07871678 | 0.1838017  | 0.1479478  |
| 0.06092524   | 0.6386646   | 0.2048264  | 0.3893007  | 0          | 0.1045147  |
|              |             |            |            |            | 0.4498543  |

|              |            |            |            |            |            |            |            |
|--------------|------------|------------|------------|------------|------------|------------|------------|
| 0.3426020    | 0.4897452  | 0          | 0          | 0.1718615  | 0          | 0.08245818 | 0.9133779  |
| 0.1389096    | 0.2158199  | 0.3828714  | 3.3037950  | 0.06331863 | 0          | 0          | 0.3253844  |
| 5.2659050    | 0.6755650  | 0.3498180  | 0.5512284  | 0.6701777  | 0.4264767  | 1.236957   |            |
| 0.05320352   | 0          | 0          | 3.99971    | 0.08925263 | 1.0811360  | 0.01907622 | 0.09073665 |
| 0.4755203    | 0.07221196 | 0.3221844  | 1.67056    | 0          | 0.2550927  | 0.3535765  |            |
| 1.8318190    | 0.1956751  | 0.4504068  | 0.2604554  | 1.0237460  | 0.05684543 | 0.5437741  |            |
| 0.1769890    | 0.2122229  | 1.4732830  | 0.4174877  | 0.2212638  | 0.2122229  | 0.7333358  |            |
| 0.3708752    | 0.4667980  | 0.9253447  | 0.07564382 | 0          | 0          | 0.1643016  | 0.8959518  |
| 0.5911045    | 0.3074457  | 0.06092524 | 0.4403743  | 0.2976633  | 0.8080796  |            |            |
| 0.1919604    | 0.1381560  | 0.2134085  | 0.7982116  | 1.3368370  | 0.2467709  | 0.4881805  |            |
| 1.0177652    | 0.6045540  | 0.5353686  | 0.4920532  | 1.0128821  | 0.4334010  | 0.1900504  |            |
| 0.3740796    | 0.04687132 | 0.9416175  | 0.1126847  | 0.1371638  | 0.1491663  |            |            |
| 0.09954431   | 1.0639750  | 0.2453970  | 0.1943038  | 0.9317104  | 0.2308575  | 0.9761532  |            |
| 0.6239585    | 0.2215704  | 0.6925169  | 1.1753890  | 0.2743277  | 0.1166416  |            |            |
| 1.0394590    | 0.2718870  | 0.3708752  | 0.8146470  | 0.03573445 | 0.9694444  | 0.5259438  |            |
| 0.1487544    | 0.2451583  | 0.0699636  | 0.1929299  | 0.6987828  | 0.3403129  |            |            |
| 0.3716552    | 0.7659173  | 0.2379738  | 0          | 0.9361011  | 0          | 0.3827668  |            |
| 0.2201736    | 0.6374903  | 0.3441453  | 0.7473938  | 1.8091140  | 0.2514821  |            |            |
| 2.0468460    | 0.1274045  | 0.1596662  | 1.9732520  | 0.1446975  | 0.3333344  | 0          |            |
| 0.09571145   | 0.2797613  | 0.3302605  | 0.5082057  | 0.08741448 | 0.4349161  |            |            |
| 0.4427673    | 1.2478260  | 0.1043719  | 0.2499463  | 0.06907799 | 0.1941557  |            |            |
| 0.2961250    | 0.1526596  | 0.5215034  | 0.3007884  | 0.01976209 | 0          | 4.540179   |            |
| 0.1474908    | 0.1560099  | 0.4074680  | 0.5972103  | 0.1764440  | 0.5357487  | 1.11778    |            |
| 0.1441514    | 0.1399272  | 1.1455060  | 0.22081    | 6.1377630  | 1.7160217  | 0.508066   |            |
| 0.2031452    | 0.3007884  | 0.2267071  | 0.0710320  | 0.1159588  | 0.1024132  | 1.306644   |            |
| 0.3675808    | 0.1876234  |            |            |            |            |            |            |
| TCGA-XF-A9T3 | 68         | 0          | 0.1080562  | 0.1925888  | 0          | 0.09995019 | 1.492438   |
| 41.761350    | 0.8784320  | 0.3926797  | 0.2629320  | 0.2479347  | 0.1779601  | 4.406319   |            |
| 0.1930985    | 0.8011693  | 0.2141082  | 1.1365510  | 0.1689532  | 1.176833   |            |            |
| 0.1072995    | 0.1182281  | 0          | 2.8569193  | 0.7538102  | 0.2155744  | 1.5876092  | 0.653223   |
| 0.1293026    | 6.8403411  | 0.2508058  | 0.1146470  | 0.1801571  | 0.1547713  | 0.6871015  |            |
| 0.69078      | 0.1536077  | 1.0402150  | 0.3292771  | 0.3855184  | 0.3350249  | 0.1386123  |            |
| 0.08400419   | 0.09303196 | 0.1666384  | 0.1915280  | 0.1142607  | 0.2034842  | 0.2236188  |            |
| 0.8705888    | 0.8449833  | 3.4518080  | 0.2874741  | 0.1103160  | 0.4776298  | 0          | 0.9888844  |
| 0.1847181    | 0.5874696  | 2.0098780  | 0          | 0.4825941  | 0.5416997  | 0.550809   |            |
| 0.2593592    | 0.32394    | 0.2507752  | 1.7451440  | 0.07985388 | 0.09651274 | 0.7822399  |            |
| 0.2373107    | 0.7483450  | 0.2211019  | 0.06809939 | 0.3642178  | 0.7066540  | 0.04095793 |            |
| 0.0791240    | 0.3258344  | 0.3202166  | 0          | 0.7156943  | 0.2203864  | 0.1397388  |            |
| 0.1879583    | 0.4580677  | 0.1860639  | 0.1309604  | 0.7143293  | 0          | 0.2088938  |            |
| 0.1689345    | 0.3895454  | 0.6996513  | 0.9286281  | 0.5771135  | 2.947354   |            |            |
| 1.4356090    | 0.1523855  | 0.07391396 | 0          | 6.8737463  | 0.6993240  | 0.5747939  | 0.4677156  |
| 0.1768815    | 0.5973631  | 0.0814586  | 1.4268440  | 0          | 0          | 4.7535240  |            |
| 0.3613765    | 0.1147743  | 0          | 0.3178914  | 0.1930985  | 0.7396218  | 0.4467161  |            |
| 0.1964406    | 0          | 0.2224663  | 0.8960446  | 0.1453459  | 1.3926     | 0.1160785  |            |



|                    |                           |                            |                            |                    |                   |                    |           |
|--------------------|---------------------------|----------------------------|----------------------------|--------------------|-------------------|--------------------|-----------|
| 1.2443410.2280114  | 10.360320.1380393         | 0.2837475                  | 1.2381710.4186438          |                    |                   |                    |           |
| 0.2767492          | 0.1891650.08913533        | 0                          | 0.1884671.7130590          | 0.1573946          |                   |                    |           |
| 0.4472377          | 0.4393509                 | 0.2178019                  | 1.5806440                  | 0                  | 0.6890115         | 0                  |           |
| 0.09822028         | 0.1283280.5541542         | 0                          | 0.7623066                  | 1.5550260.06598778 |                   |                    |           |
| 0.08158873         | 0.2721557                 | 0.6633058                  | 0.1368444                  | 2.9203790.09673209 |                   |                    |           |
| 0.4791233          | 0.1270511                 | 0.2647874                  | 0.3133408                  | 0.7899398          | 0.07533119        | 0                  |           |
| 0.1631775          | 0.03327332                | 0.6424471                  | 0                          | 0.2857681          | 0.6794840.3631322 |                    |           |
| 0.3480378          | 0.3707771                 | 0.1296073                  | 0.7168357                  | 0.5612587          | 0                 | 0.2339292          |           |
| 0.6948918          | 0.2726399                 | 0.4958694                  | 0.5160316                  | 0                  | 0.5574211         | 0.320758           |           |
| 1.19333            | 0.02979845                | 0.09354312                 | 1.3327530.1557151          | 0.03250051         | 0.09401047        |                    |           |
| 0                  | 0.1614630                 | 0.1925525                  | 0.3371257                  | 0                  | 0                 | 0.9665720.09202621 |           |
| 0.9992846          | 0.5581917                 | 0.03362379                 | 0.6457348                  | 0.02839052         | 0.05336943        |                    |           |
| 2.9239140.3869284  | 0                         | 0                          | 1.94964                    | 0.2720349          | 0.07359444        | 0.1132473          |           |
| 0.7012523          | 0.2907469                 | 0.1428944                  | 0.8953617                  | 0.1395479          | 0.7240666         | 0                  |           |
| 0.1297955          | 0.1979634                 | 0.0314015                  | 0.4648423                  | 0.4021618          | 0.7398279         | 0                  |           |
| 0.7326267          | 0                         | 0.0595969                  | 1.2257890.0855520.09650869 | 0.3414965          |                   |                    |           |
| 0.7472501          | 0.2569788                 | 0.06236208                 | 0.2130881                  | 2.4757860          | 1.297091          |                    |           |
| 0.2893742          | 1.6958347.3007090.1299006 | 0.3447101                  | 0.1515565                  | 0.3182215          |                   |                    |           |
| 0.04429709         | 0                         | 0.5823389                  | 0.1134150.05017146         |                    |                   |                    |           |
| TCGA-PQ-A6FN       | 507                       | 0                          | 0.01729199                 | 0.03698347         | 0                 | 0.03198961         | 0.6103473 |
| 70.236840          | 0.2010869                 | 0.1893439                  | 0.1190293                  | 0                  | 0.4754482         | 0                  |           |
| 1.8910880.03737811 | 0.1256809                 | 0                          | 0                          | 0.03766519         | 0.02060507        | 0.2270374          |           |
| 0.4264354          | 2.53210961.8167           | 0.08757156                 | 1.3012910.7961051          | 0.06207604         |                   |                    |           |
| 0.5473223          | 1.1759610.2291592         | 0                          | 0                          | 0.4031695          | 0.13818           | 0.03687224         |           |
| 0.04993898         | 0.06147574                | 0.1212599                  | 0.2814698                  | 0.0939465          | 0.13443           |                    |           |
| 0.08932618         | 0.1600002                 | 4.2481520                  | 0.1953788                  | 0.02147114         | 0.2089776         | 0                  |           |
| 3.9229130.04600382 | 0.04442036                | 0.1070076                  | 0                          | 0.6543809          | 0.1330201         |                    |           |
| 0.0539411.3054650  | 0                         | 0.4247566                  | 0.1857579                  | 0.08232386         | 0.1429605         | 0                  |           |
| 0                  | 0.3351258                 | 0.09200765                 | 0.1019352                  | 0.05495713         | 0.1898815         | 0.08981699         |           |
| 0                  | 0.03269338                | 0.1076030.02165443         | 0.03932644                 | 0.05697917         | 0                 | 0.1537306          |           |
| 0                  | 0.1561786                 | 0                          | 0.1006294                  | 0.06015711         | 0.1099553         | 0                  | 0         |
| 0                  | 0.04011458                | 0                          | 0.03175714                 | 0.1832132          | 0.04458189        | 0.1385313          |           |
| 0.3388494          | 1.5904890.07722206        | 0.03548486                 | 0                          | 0.4177178          | 1.661404          |                    |           |
| 0.5124767          | 0                         | 0.09907086                 | 0.7010277                  | 0.07821384         | 0.2802290         | 0.1017429          |           |
| 0                  | 4.1796930.05728981        | 0.1734908                  | 0                          | 0                  | 0.5087145         | 0.09270336         |           |
| 0.3550801          | 0.1429740                 | 0                          | 0.01780039                 | 0.6309249          | 0                 | 0.5240096          |           |
| 0.1114547          | 0.8526347                 | 0.03648815                 | 0.2181498                  | 0.07573757         | 0                 | 1.310437           |           |
| 0.1339893          | 0.09621091                | 0                          | 0                          | 0                  | 0.2261996         | 0.7919515          | 0         |
| 0.1054625          | 0.1045631                 | 1.5651090                  | 0                          | 0.1984698          | 0                 | 0                  | 0.4312569 |
| 0.2217002          | 0                         | 0.5123590.2831710.03167963 | 0                          | 0.08710493         | 0                 | 0.1920366          |           |
| 0.6547921          | 0.09287893                | 0.04600382                 | 0                          | 0                  | 0                 | 0.2725765          | 0.1808262 |
| 0.1305646          | 0.0479219                 | 0.08812233                 | 0                          | 0.03741613         | 0.2718408         | 0.6537514          |           |
| 0.04177178         | 0.08900195                | 0.04888896                 | 0.7814866                  | 0.3233412          | 0.1320648         | 0                  |           |
| 0.2502045          | 0                         | 0                          | 0.4048404                  | 0                  | 0.2482634         | 0.2013723          | 0.2673524 |

|              |             |            |             |             |            |            |
|--------------|-------------|------------|-------------|-------------|------------|------------|
| 0.05722296   | 0.1796340   | 0.3508760  | 0.07475621  | 0.03900738  | 0.2256643  | 0          |
| 0.09575468   | 0           | 0.1617722  | 0.1618484   | 0.1474151   | 0          | 0.2615471  |
| 0.04418025   | 0.3731310   | 0.1786524  | 0.09685334  | 0.5904886   | 0.01362982 |            |
| 0.02562177   | 0.4294164   | 0.04643946 | 0.08558477  | 0           | 0.7444551  | 0.1469243  |
| 0.03533147   | 0.1087363   | 0.4488794  | 0           | 0.05880105  | 0.04004797 | 0          |
| 0.04434003   | 0           | 0.0950389  | 0.02261301  | 0.1115815   | 0          | 0          |
| 0            | 0           | 2.6808570  | 0.2327418   | 0.03603617  | 0.02799091 | 0.01793712 |
| 0            | 0.2046001   | 0.5722809  | 0           | 1.07279     | 0.1389237  | 0.7183605  |
| 0.01700812   | 0.08274478  | 0          | 0.07638641  | 0           | 0          | 0.03289073 |
| TCGA-DK-A3WW | 633         | 0          | 0.06856047  | 0.1026442   | 0          | 0.1395181  |
| 81.389810    | 0.1694227   | 0.3002895  | 0.1887743   | 0.0270993   | 0.4125342  |            |
| 0.1470227    | 0.6354166   | 0.03704983 | 0.03889236  | 0.09738104  | 0.1286388  |            |
| 0.2090726    | 0.03267857  | 0.2475477  | 0.1127174   | 1.620571126 | 0.98680    | 0.05050324 |
| 0.1326715    | 0.4419034   | 0          | 0           | 0.2976084   | 0.1817173  | 0          |
| 0.1314877    | 0.04385808  | 0          | 0.1462460   | 0.0506084   | 1.9131270  | 0.06208093 |
| 0.07461965   | 0           | 1.2053221  | 0.5562880   | 0.08699664  | 0.05164342 | 0.01702605 |
| 0.7180930    | 0.3931647   | 0.36118    | 0.1823991   | 0.4931385   | 0.04848815 | 0          |
| 0.4570863    | 0.02688639  | 0.2250434  | 0           | 0.04618468  | 0.03062008 | 0          |
| 0.007912808  | 0.07679494  | 0.08221458 | 0.4455196   | 0.0885820   | 0.1398393  |            |
| 0.1249220    | 0.0363163   | 0.1505711  | 0.3561126   | 0.6312905   | 0.3370250  | 0.0106658  |
| 0.1259236    | 0.1403318   | 0.2259150  | 0.2170753   | 0.06095219  | 0          | 0.1733837  |
| 0.02659883   | 0.1574199   | 2.4413670  | 0.03541666  | 0.04985576  | 0          | 0          |
| 0.06431229   | 0.002798064 | 0.2857238  | 0           | 0           | 0.0797238  | 0.5255067  |
| 0.08057247   | 0           | 0          | 0           | 0.7268691   | 0.5314208  | 0.2492788  |
| 0.06317007   | 0.1240431   | 0.25925    | 0.1354021   | 0.04033973  | 0          | 0.7769631  |
| 0.1375737    | 0.01456461  | 0.04618468 | 0.04033973  | 0.07351134  | 0.2104034  |            |
| 0.1133746    | 0           | 0.09738104 | 0.07763384  | 0.9096490   | 0.02213289 | 1.3038920  |
| 2.2781270    | 0.4918805   | 0          | 0.1351303   | 0.1620312   | 0.5570661  | 0.10625    |
| 0.2034473    | 0           | 0.03393324 | 0           | 0.07174815  | 0.7970729  | 0.07700494 |
| 0.0340521    | 0           | 0          | 0.1504352   | 0.03912223  | 0          | 0.3004553  |
| 0.2442682    | 0.1406419   | 0          | 1.8573130   | 0.4116699   | 0          | 0.0931809  |
| 0.8206777    | 0.1202210   | 0.06108623 | 0.4419034   | 0.3283184   | 0.09673507 |            |
| 0.01120032   | 0.02385736  | 0.1127719  | 0.05735619  | 0           | 0.07592518 | 0.02533387 |
| 0.2096361    | 0           | 0.02967001 | 0.08622505  | 0.1244179   | 0.0993718  | 0.1411524  |
| 0.03524334   | 0.3524890   | 0.08546703 | 0.1047240   | 0.6827576   | 0.3968112  | 0.1037923  |
| 0.3775485    | 0.3928998   | 0.01818873 | 0.2658974   | 0.3710280   | 0.147473   |            |
| 0.07122252   | 0.2455019   | 0          | 0           | 0.1993968   | 0          | 0.05242852 |
| 0.06417079   | 0           | 0          | 0.3562596   | 0.2102027   | 0.4226902  | 1.4166670  |
| 1.3110780    | 0.01080809  | 0.0203174  | 0.008584436 | 0.8838067   | 0.06786649 | 0          |
| 0.0716424    | 0.27185     | 0.05603386 | 0.08622505  | 0.08898741  | 0.1475806  |            |
| 0.2409097    | 0.9061329   | 0          | 0.02120365  | 0.03516048  | 0.04941232 | 0          |
| 0.05977174   | 0.06636092  | 0          | 0           | 0.4015185   | 0.3984375  | 0.07507239 |
| 0.02268815   | 5.02945     | 0.09770728 | 0.01632899  | 0.1268346   | 0.3698153  |            |
| 0.02445754   | 0.07122252  | 0.1825228  | 0.9774236   | 0.1123916   | 0.7089121  |            |

|              |            |            |            |             |            |            |            |
|--------------|------------|------------|------------|-------------|------------|------------|------------|
|              | 0.02754072 | 0.1898804  | 1.6096970  | 0.08541762  | 0.7217589  | 0          | 0.1211448  |
|              | 0.1264771  | 0.07819202 | 0.07824446 | 0.004797372 | 0.1814495  |            |            |
| TCGA-XF-AAMY | 3011       | 0          | 0.3737915  | 0.5329677   | 0.1807456  | 0.2996509  |            |
|              | 0.03824216 | 28.482860  | 0.2173394  | 0.2728630   | 0.1715328  | 0.1477453  |            |
|              | 0.7844668  | 0.2671891  | 0.8314297  | 0.1885292   | 0.2252936  | 0.1179825  |            |
|              | 0.4324919  | 0.4885128  | 0.1336226  | 0.2044894   | 0          | 4.91603536 | 2.2134     |
|              | 0.05736325 | 0.1339491  | 0.2294530  | 0.08945762  | 1.41974    | 0.8293087  | 0.4953611  |
|              | 0.06232056 | 0.3212342  | 1.0563750  | 0.5675228   | 0.1062730  | 0.3598346  | 0.2531215  |
|              | 0.1471557  | 0.02317859 | 0.1776942  | 0.1743541   | 0.2574554  | 0.05764398 |            |
|              | 19.583240  | 0.07905092 | 0.1877066  | 0.07735499  | 0.3011570  | 0.4546881  | 3.677286   |
|              | 0.1988881  | 0.0882390  | 0.3745062  | 0           | 0.4807586  | 0.9584745  | 0.1465845  |
|              | 2.7810550  | 0.2650182  | 0.08393292 | 0.8347030   | 0.1070781  | 0.05752082 | 0.2658323  |
|              | 0.2241169  | 0.6939921  | 0.2073720  | 0.02209866  | 0.2804425  | 0.1055981  | 0.6202457  |
|              | 2.97700515 | 0.373350   | 0.04711435 | 0.05814991  | 0.06241229 | 0.2550295  | 0.1094834  |
|              | 0.05635687 | 0.3323112  | 0          | 0.3601097   | 0.8386049  | 0.09667787 | 0.4074536  |
|              | 0.1584563  | 0.06436386 | 0.8154406  | 0.1235516   | 0.0748639  | 0.1300703  |            |
|              | 0.07791788 | 0.1423804  | 0.7920843  | 0           | 0.09981853 | 0.7405216  | 1.37523    |
|              | 0.05857079 | 0          | 0          | 0.3611832   | 2.2291251  | 0.0225780  | 0.1294350  |
|              | 0.1690706  | 1.41343    | 0.0984283  | 0.07331071  | 0.06287502 | 2.0911910  | 0.4953611  |
|              | 0.4166953  | 0.01764582 | 0.2517988  | 1.3195930   | 0.2671891  | 0.5229513  |            |
|              | 0.8241577  | 0          | 0.05899125 | 0.1988037   | 1.2605150  | 0.04022283 | 0.7811885  |
|              | 0.6261043  | 0          | 0.8173752  | 0.2182904   | 0.1963098  | 1.9079365  | 0.020381   |
|              | 0.1650587  | 0.1963098  | 0.1850040  | 0.08576641  | 2.0862441  | 0.5802330  | 0.0699718  |
|              | 0.1088929  | 0.06188399 | 0.3039635  | 1.2054840   | 0.7518247  | 0          | 0          |
|              | 0          | 0.7474872  | 0          | 0.2555932   | 0          | 0.4219195  | 1.11912    |
|              | 0.4515752  | 0.3138167  | 1.0325380  | 0.8666437   | 0.6216785  | 0.6692379  |            |
|              | 2.0551760  | 0.1757998  | 0.1017735  | 0.08671352  | 0.8026973  | 0.1042353  |            |
|              | 0.1903183  | 0.10035    | 0.02302004 | 0.6667125   | 0          | 0.2875749  | 0.4700988  |
|              | 0.1884239  | 0.1203944  | 1.4108650  | 0.4227225   | 2.2420640  | 0          | 0.2157909  |
|              | 0.1201897  | 1.38325    | 0.3430656  | 2.3946120   | 0.7527144  | 0.3755491  |            |
|              | 0.7155216  | 0.2061596  | 0.06471751 | 1.1897560   | 0.4309239  | 0.1573976  |            |
|              | 0.2508718  | 0          | 0.1774180  | 1.0657350   | 0.3498590  | 0.07081315 | 0.2036643  |
|              | 0.6048874  | 0.5730123  | 0.4609012  | 1.2872770   | 0.1628376  | 0.3616544  |            |
|              | 0.05892567 | 0.1107704  | 0.4628231  | 0           | 0.1850040  | 0.1354060  | 0.1999693  |
|              | 0.1527482  | 0          | 0.08085986 | 0.06705078  | 0.9744874  | 0.5848253  | 0.09654579 |
|              | 0.4238750  | 0.1916949  | 0.2244966  | 0.1369603   | 0.3476005  | 0.2009998  | 0          |
|              | 0.07312108 | 0.4191852  | 2.0998710  | 0.04547717  | 0.02061596 | 0          | 0.157837   |
|              | 0.1335385  | 0.2074506  | 0.2843404  | 0.0444475   | 0.08629001 | 0.2119224  | 0          |
|              | 0.2553162  | 0.8529628  | 0.1001013  | 1.3803033   | 0.3041780  | 0.08170118 | 0.03974776 |
|              | 0.1048539  | 0.4403210  | 0.1072638  | 0           | 0.8531773  | 0.08718421 | 0.1214884  |
| TCGA-K4-A3WS | 761        | 0          | 0.18033    | 0.3856832   | 0.05449872 | 0.6672094  | 0.6687889  |
|              | 33.117780  | 0.2617813  | 0.5024162  | 0.1919730   | 0.2068835  | 0.01484948 | 3.622859   |
|              | 0.8056333  | 2.0055530  | 0.1542953  | 0.5274637   | 0.1067229  | 0.2114687  |            |
|              | 1.5057050  | 0.1611605  | 0.4932639  | 0.06176522  | 3.43660757 | 0.213280   | 0.05534805 |

|                           |                    |                                   |                                          |
|---------------------------|--------------------|-----------------------------------|------------------------------------------|
| 0.1938650.4151104         | 0.1618405          | 4.8516031.2394010.9459603         | 0.3382381                                |
| 0.3228636                 | 1.1785250.8706128  | 0.3044143                         | 1.3453750.4045046 0.4048821              |
| 0.1537547                 | 0.1292692          | 0.3037467                         | 0.3881421 0.2433328 12.21975             |
| 0.3813691                 | 0.05659761         | 0.1679343                         | 1.3318121.4884963.9954370.5197317        |
| 1.54413                   | 0.5579663          | 0.6408722                         | 1.42729 0.1541338 0.6080632 0.9372014    |
| 0                         | 0.0506152          | 0.2013449                         | 0.4197227 0.6829113 0.2965706 0.180203   |
| 0.3836317                 | 1.1164170.01998968 | 0.1530125                         | 0.6527224 0.5060475                      |
| 1.67818112.6378           | 0.4545920.3156023  | 0.6021972                         | 0.5980874 0.3631278                      |
| 0.03398565                | 0.3117304          | 0.4570295                         | 0.1900166 0 0.2040533 0.1516097          |
| 0.09555605                | 0.2716994          | 0.4371077                         | 0.07450699 0 0.1045840.1644575           |
| 0.5182358                 | 0.9924739          | 0.3099491                         | 0.7825339 2.3558011.0827280.6287091      |
| 0.4934066                 | 0.04632391         | 3.3397414.4310771.47313           | 0.5463846 0.2090926                      |
| 0.3876881                 | 0.2039139          | 2.0429580.5342089                 | 0.1768382 0.3791637                      |
| 2.0802410                 | 0.5528278          | 0.03724419                        | 0.1012304 0.7957718 0.8056333            |
| 1.6005491.4288830.4097885 | 0.03557429         | 0.3828659                         | 1.0093740.2183051                        |
| 0.8165571                 | 0.3390068          | 1.1987790.8878755.9907860.1398660 | 1.221012                                 |
| 0.7568770.1353711         | 0.2367667          | 0.7065811                         | 0.3620461 1.9264591.29707                |
| 0.04219604                | 0.3283359          | 0.1865937                         | 0.1374774 0.9995693 1.071632             |
| 0.04287525                | 0.06797129         | 0.3240515                         | 0.1106961 0.9015346 0.5889422            |
| 0.8477360.03968156        | 0.6360895          | 1.8270180.3854341                 | 0.2042396 0.7191314                      |
| 2.2831070.5314074         | 2.5238750.6860852  | 1.27934 0                         | 0.2700449 0.1307301                      |
| 1.0814140.09428761        | 0.6503644          | 0.2571906                         | 0.06941042 0.7466765 0                   |
| 0.3143240.3779867         | 0.2272556          | 0.3267138                         | 0.5800998 0.2935443                      |
| 1.7695190.4683297         | 0.1530269          | 0.1626641                         | 1.1596730.9479092 0.827534               |
| 1.1447420.07973433        | 0.6388497          | 0.7720652                         | 2.60554 0.2237818 0.2341648              |
| 0.4484217                 | 0.4872485          | 0.2847528                         | 0.9637518 0.2136241 0.08717768 0         |
| 1.0644460.1406535         | 0.2989238          | 0.3070461                         | 1.6772240.4607351 1.29707                |
| 1.1256120.3927926         | 1.1546120.2013635  | 0.1558652                         | 4.0516890.04035795                       |
| 0.3346963                 | 0.1121526          | 1.1526020.5745769                 | 0.1535231 0.09449667                     |
| 0.04876201                | 0.04043453         | 1.4819211.1253120.1746639         | 0.3485660.07706691                       |
| 0.5415248                 | 0.2477791          | 0.1572136                         | 0.09696928 0 0 0.4962113                 |
| 5.2835840.05484942        | 0.03729697         | 0.1704720.2974456                 | 0.1252681 0.6845846                      |
| 1.09117                   | 0.08041132         | 0.1040733                         | 0.6223228 0.2677971 0.1231734            |
| 0.7876346                 | 0.3018272          | 1.87286111.955380.2414199         | 0.3116052 0.1896944                      |
| 0.5310654                 | 0.1386101          | 0                                 | 0.9003803 0.005257587 0.1255933          |
| TCGA-UY-A9PA              | 1072               | 0                                 | 0.02032462 0.3042868 0.07370924 0.319599 |
| 0.03119081                | 26.995750          | 0.1477207                         | 0.2596424 0.5596177 0.2209222            |
| 0.1498316                 | 0.2724037          | 0.1130208                         | 0.2086837 0.01801495 0.09622808          |
| 0.08580311                | 0                  | 0.6660156                         | 0.1667842 0.08353713 1.14822 18.85107    |
| 0.05614346                | 0.3496020.09357244 | 0.2188884                         | 0 0.3529018 0.06733717                   |
| 0.05082947                | 0.1310014          | 0.9046734                         | 0.09744822 0.1300164 0.05869717          |
| 0.1754818                 | 0.04500829         | 0.02835714                        | 0.07131463 0.1422055 0 0                 |
| 7.0079780                 | 0.03827399         | 0.06309175                        | 0.4093794 1.2714841.9564030.05407188     |
| 1.8795850.05390332        | 0.1083470.3167067  | 0                                 | 0.003622918 0.3335684                    |

|                    |                                           |                           |                            |                    |                   |                    |   |
|--------------------|-------------------------------------------|---------------------------|----------------------------|--------------------|-------------------|--------------------|---|
| 0.07205078         | 0                                         | 0.09077263                | 0                          | 0.005864342        | 0.09756735        | 0.1218618          |   |
| 0.8962126          | 0.06564991                                | 0.01802396                | 0.2723007                  | 0.1722544          | 0.4017286         |                    |   |
| 0.4222756          | 3.8052790.2305625                         | 0.03161855                | 0.008484048                | 0.06933515         |                   |                    |   |
| 0.02232402         | 0.09193082                                | 0.1505763                 | 0.3090650.2202826          | 0.03108987         |                   |                    |   |
| 0.2365552          | 0.07777807                                | 0.2584781                 | 0.05249601                 | 0.1477965          | 0.7053922         |                    |   |
| 0.06105998         | 0.1768117                                 | 0                         | 0.01658962                 | 0.2081666          | 0.05240057        | 0                  |   |
| 0.1838198          | 1.2151270.009554222                       | 0                         | 0.1253057                  | 0                  | 0.6733717         | 0.1390047          |   |
| 0.1055689          | 0.1497159                                 | 0.2808997                 | 0.09193082                 | 0.4940625          | 0.2006985         | 0                  |   |
| 0.05128169         | 0.5102230.1346743                         | 0.2039173                 | 0.01439217                 | 0.1369136          |                   |                    |   |
| 0.05979318         | 0.1634422                                 | 0.4356985                 | 0.7562181                  | 0                  | 0.1443421         | 0.2039913          |   |
| 1.2640490.06561255 | 0.9344832                                 | 0.06550071                | 1.34048                    | 0.2144368          | 0.05128169        |                    |   |
| 0.2336782          | 0.08005642                                | 0.5398846                 | 0.3149761                  | 0.1615488          | 0                 | 0.05029723         |   |
| 0.2098566          | 0.9039581                                 | 0.5907269                 | 0                          | 0                  | 0.06197916        | 0.1843517          |   |
| 0.7804340.05798855 | 0.04596541                                | 0.42414                   | 0.4491477                  | 0.3325420.434477   |                   |                    |   |
| 0.1042326          | 0.05366911                                | 3.0971081.6540790.4840621 | 0.3222718                  | 0.1535718          |                   |                    |   |
| 0.9357244          | 0.4039120.0362178                         | 0.6004231                 | 0.5407188                  | 0                  | 0.2158203         |                    |   |
| 0.07072469         | 0.09750709                                | 0                         | 0.05174203                 | 0.04092341         | 0.1314281         | 0.1812598          |   |
| 0.2468549          | 0.1612530.7668375                         | 0.2049080.2454882         | 0.3661383                  | 0.06268692         |                   |                    |   |
| 0.2443828          | 0.3167067                                 | 0.1552261                 | 0.1760019                  | 0.3921131          | 0.1025634         |                    |   |
| 0.06995221         | 0.5468615                                 | 0.02696007                | 0.2880136                  | 0.6126056          | 0.04489145        |                    |   |
| 0.1513319          | 0.05278445                                | 0.6307475                 | 0.2196670.04584841         | 0.1667228          |                   |                    |   |
| 0.1444627          | 0.03483627                                | 0                         | 0.05432669                 | 0                  | 0.05775613        | 0.3322226          |   |
| 0.2256042          | 0.3634994                                 | 0.1879585                 | 0.6824482                  | 0.07589285         | 0.2776189         |                    |   |
| 0.03204037         | 0.06023053                                | 0.3986916                 | 1.25543                    | 0.1005945          | 0                 | 0.1529154          |   |
| 0.3645712          | 0.04152783                                | 0                         | 0.1319007                  | 0.1093750.2764538  | 0.7249011         | 0                  |   |
| 0.7228649          | 0                                         | 0.1831024                 | 0                          | 0.06201727         | 0.06557522        | 0.1134658          | 0 |
| 0.06331351         | 1.6536240.1112753                         | 0.1008879                 | 0.5379791                  | 0.09655046         |                   |                    |   |
| 0.1089157          | 0.4793985                                 | 0.3373262                 | 0.03625196                 | 0                  | 0.3006030.2587102 |                    |   |
| 0.1249435          | 0.5000255                                 | 0.04082197                | 0.4503174                  | 4.7547510.03331828 |                   |                    |   |
| 0.09725639         | 0                                         | 0.0897829                 | 0.08748577                 | 0.07726625         | 0.1739657         | 0.02844344         |   |
| 0.07077679         |                                           |                           |                            |                    |                   |                    |   |
| TCGA-G2-AA3F       | 893                                       | 0                         | 0.1125736                  | 0.2708643          | 0.0510324         | 0.3254023          | 0 |
| 36.348950          | 0.07159184                                | 0.3081648                 | 0.2905874                  | 0.2641949          | 0.2607406         |                    |   |
| 0.9807096          | 1.69541                                   | 0.1748988                 | 0.03492329                 | 0.03331163         | 0                 | 0.06130159         |   |
| 0.1676779          | 0.06928357                                | 0.2313469                 | 6.89077337.923510.05182771 | 0.01512788         |                   |                    |   |
| 0.06478464         | 0.2020625                                 | 0                         | 3.0541330.1398622          | 0.3167249          | 0.03023283        |                    |   |
| 0.8053050.3485848  | 0.2250414                                 | 0.3251107                 | 0.4573907                  | 0.1090648          |                   |                    |   |
| 0.006544332        | 0.1226399                                 | 0.2953668                 | 0.2907638                  | 0                  | 16.415780.580308  |                    |   |
| 0.2914879          | 0.1223081.0203580.9536684.0515970.1871826 | 2.1688770.1492793         |                            |                    |                   |                    |   |
| 0                  | 1.0337070                                 | 0.05894547                | 2.7713430                  | 0.3791671          | 0.2199617         | 0                  |   |
| 0.008120325        | 0.09382015                                | 0.5062242                 | 0.4898609                  | 0.3181678          | 0.01871826        |                    |   |
| 0.1583625          | 0.0521762                                 | 0.5253676                 | 1.8272597.9901050.05320978 | 0.04378205         |                   |                    |   |
| 0.01762173         | 0.2880241                                 | 0.04636794                | 0.0954721                  | 0.3961543          | 0.4279607         |                    |   |
| 0.1779308          | 0                                         | 0.1910748                 | 0.09301269                 | 0                  | 0.5088367         | 0.6139590.06976807 |   |

|              |            |            |             |            |            |            |             |           |            |
|--------------|------------|------------|-------------|------------|------------|------------|-------------|-----------|------------|
| 0            | 0.1550592  | 0          | 0           | 0.7852253  | 0          | 0          | 0.1151465   | 2.6101560 | 0.02315194 |
| 0.02887651   | 0          | 0.5098893  | 2.843864    | 1.924791   | 0.03654518 | 0.04606908 |             |           |            |
| 0.7130941    | 0.3182403  | 1.292238   | 0.2501156   | 0.04139765 | 0.1420192  | 5.23226    |             |           |            |
| 0.1398622    | 0.7059081  | 0          | 0.1895836   | 0.7865554  | 0.2263176  | 0.1270125  |             |           |            |
| 1.3380010    | 0.1665582  | 0.2426308  | 2.567139    | 0.1249234  | 0.5440573  |            |             |           |            |
| 0.4081432    | 0.6938485  | 0          | 0.3905522   | 0.7318913  | 0          | 1.209313   | 0.6542186   |           |            |
| 0.1118479    | 0.1108537  | 0.2437621  | 0.1937249   | 1.141261   | 1.561591   | 0.1185366  |             |           |            |
| 0            | 0          | 0          | 1.616715    | 1.080663   | 0.08029645 | 0.06364807 | 0.6656117   | 0         |            |
| 0.1534898    | 0.1504045  | 0.3608258  | 0.07431534  | 0.7147583  | 1.218518   |            |             |           |            |
| 0.6444983    | 0.254999   | 0.6379503  | 0.712631    | 0.7978178  | 0.21314    | 0.8314029  |             |           |            |
| 1.235405     | 0.198544   | 0.229881   | 0.07344909  | 1.446617   | 0.05886038 | 0.2149408  |             |           |            |
| 0.1558327    | 0.01299913 | 0.2330617  | 0.04272734  | 0.5582156  | 0.3539453  |            |             |           |            |
| 0.2979218    | 0.985786   | 0.7604847  | 0.1916883   | 1.201888   | 0.04385422 | 0          |             |           |            |
| 0.1218545    | 0.1357392  | 1.100647   | 0.09686247  | 1.140772   | 0.7949982  |            |             |           |            |
| 0.3518401    | 0.01554024 | 0.3143227  | 0.4750874   | 0.8733929  | 0.4258405  |            |             |           |            |
| 0.419008     | 0.3095626  | 0.1500276  | 0.1057517   | 0.0351297  | 1.861841   | 0.2634148  |             |           |            |
| 0.03998731   | 0.2875168  | 0.1373156  | 0.3595256   | 0.9109284  | 0.5815277  |            |             |           |            |
| 0.3940817    | 0.4805218  | 0.3105629  | 0.3544539   | 0.3494461  | 0.03779104 |            |             |           |            |
| 0.2785853    | 0          | 0.0529353  | 0.3121912   | 0.02875168 | 0.04424317 | 0          | 0           |           |            |
| 1.371715     | 1.0885     | 0.05451822 | 0.2611167   | 0          | 0.7859768  | 0.3093592  |             |           |            |
| 0.2698928    | 0.4086076  | 0.628462   | 0.03096793  | 1.209845   | 6.74663    | 0.07704119 |             |           |            |
| 0.1862653    | 0.3192587  | 0.1336929  | 0.1340578   | 0.5011195  | 0.6568508  |            |             |           |            |
| 0.1003958    | 0.02436345 | 0.6815986  | 0.2507642   | 0.1730087  | 0.7576072  |            |             |           |            |
| 0.02826299   | 1.208132   | 1.592491   | 0.212224    | 0.1571155  | 0          | 0.3108048  | 0.008652935 |           |            |
| 0            | 0.8029645  | 0          | 0.5390235   |            |            |            |             |           |            |
| TCGA-FJ-A871 | 272        | 1          | 0.09175805  | 0.07008883 | 0          | 0.266749   | 0.1408148   | 61.0663   |            |
| 0            | 0.4573054  | 0.4784442  | 0           | 0.142483   | 13.32757   | 0.4567831  | 1.62793     |           |            |
| 0.06375306   | 0.1138630  | 0.1906101  | 0.1142093   | 0.05466929 | 0.2796739  | 0          |             |           |            |
| 1.43961      | 54.65182   | 0.05431429 | 0.3945805   | 0.3017461  | 0          | 0.3319207  |             |           |            |
| 1.631153     | 1.302866   | 0.03278229 | 0.02816297  | 0.305625   | 0.09951074 | 0.08385365 |             |           |            |
| 0.2271392    | 0.07323179 | 0.1403017  | 0.3413917   | 0.06379829 | 0.07133383 |            |             |           |            |
| 0.03385712   | 0.6670902  | 0.39548    | 0.1247487   | 0.2221621  | 0.02441448 | 1.42575    |             |           |            |
| 0.03416831   | 5.369492   | 0.4377505  | 0.1970003   | 0.06987804 | 1.5854380  |            |             |           |            |
| 0.06892935   | 0.6023746  | 0.5111579  | 0           | 0.3805327  | 0.4224445  | 0.04160406 |             |           |            |
| 0.1887772    | 0.07859433 | 0.1521077  | 0.127022    | 0.1511184  | 0.1053716  |            |             |           |            |
| 0.04166057   | 0.172729   | 0.680863   | 0.08046562  | 0.1239171  | 0.2345112  | 0.0766046  |             |           |            |
| 0.01490582   | 0.4751274  | 0.02964523 | 0.291341    | 0.09966519 | 0.3314979  | 0          |             |           |            |
| 0.07628273   | 0.1231266  | 0          | 0           | 0.04766041 | 0.2599659  | 0          | 0.02280682  |           |            |
| 0.2664148    | 0.01069941 | 1.087939   | 0.03379556  | 0.1050145  | 0.1100858  |            |             |           |            |
| 0.4621771    | 0.1294012  | 0          | 0           | 0.2216574  | 1.606868   | 0.9562731  | 0.03404315  |           |            |
| 0.06973687   | 0.6884281  | 0          | 0.7080975   | 0          | 0.1156902  | 0.0661479  |             |           |            |
| 2.406887     | 0.1737155  | 0.3945472  | 0.004641088 | 0          | 0.5013242  | 0.1405486  |             |           |            |
| 0.1686013    | 0          | 0          | 0.03103098  | 0.07084187 | 1.31526    | 0.03173744 | 1.082105    |           |            |
| 0.04224445   | 0.3828667  | 0.1106402  | 0.4299613   | 0.1722399  | 0.05163211 |            |             |           |            |

|                   |            |            |            |            |             |            |            |            |
|-------------------|------------|------------|------------|------------|-------------|------------|------------|------------|
| 1.1265190.2539284 | 0.09377132 | 0.06884281 | 0.03243902 | 0.04511543 |             |            |            |            |
| 0.06858878        | 1.1660520  | 0          | 0.5208423  | 0.07994649 | 0.2377939   | 1.0426290  |            |            |
| 0.05929046        | 0.1458920  | 0.2502171  | 0.3269169  | 0.1344489  | 0.0346137   |            |            |            |
| 0.3883967         | 0.8000944  | 0.02401493 | 0          | 0.2311064  | 0.6638414   | 0.02298544 |            |            |
| 0.2511043         | 0.3168334  | 0.7323428  | 0.04623771 | 0.05353559 | 0.04561364  |            |            |            |
| 0.8714322         | 0.05483056 | 0.1668542  | 0.2177456  | 0          | 0.06680165  | 0.07960411 |            |            |
| 0.1229086         | 0.1648564  | 0.6805967  | 0.06333069 | 0          | 0.04042971  | 0.6304552  |            |            |
| 0.7353320         | 0.02837795 | 0.1896690  | 0.03307395 | 1.1278860  | 0.4397254   | 0.0347756  |            |            |
| 0.3641744         | 0.09877447 | 0.3763836  | 0.09760095 | 0.03404315 | 0.2503375   |            |            |            |
| 0.05666939        | 0.1241930  | 0.1319653  | 0          | 0.07950048 | 0           | 0.3854159  | 0          | 0          |
| 0.1071329         | 0.7387056  | 0.2009466  | 0.5657083  | 0.2031427  | 0.1468405   |            |            |            |
| 0.2238117         | 0.04132865 | 0.1748046  | 1.0394810  | 0.4928519  | 0.03243902  |            |            |            |
| 0.3913170         | 0.1177988  | 0.04331322 | 0.05356645 | 0.0412141  | 0           | 0          | 0.02971632 |            |
| 0.8338495         | 0          | 0.0608099  | 0          | 0.04723649 | 0           | 0.04571179 | 0.04229251 |            |
| 0.1463587         | 0          | 0.3838380  | 0.4570711  | 0          | 0.0650673   | 0.3469678  | 0.166053   |            |
| 0.07804979        | 0.1454995  | 0.3943227  | 0.6078950  | 0.0680863  | 0.2471879   |            |            |            |
| 7.9088890         | 0.02686063 | 0.3365112  | 0.0535831  | 2.706343   | 6.754430    | 0.04727472 | 1.630854   |            |
| 0.05515596        | 0.2895258  | 0.0403026  | 0          | 0.1994641  | 0.004586124 | 0.1460712  |            |            |
| TCGA-ZF-A9RN      | 615        | 1          | 0.04972805 | 0.05317826 | 0           | 0.1073278  | 0.05087617 |            |
| 66.4275           | 0          | 0.4578073  | 0.2420056  | 0.1141009  | 0.01637965  | 0.04293414 |            |            |
| 0.0888650         | 0.5223287  | 0.1074914  | 0.08227705 | 0          | 0.2332596   | 0          | 0.02962789 |            |
| 0                 | 0.06812983 | 2.172554   | 39.7141    | 0.2060485  | 0.1603814   | 0.2289428  | 0          | 0          |
| 0.4796896         | 0          | 0.04145466 | 0.03561332 | 0.8783554  | 0.08609814  | 0.1060367  |            |            |
| 0.09574253        | 0.1262793  | 0.4343676  | 0.03854508 | 0.1388374  | 0.06443199  |            |            |            |
| 0.4281383         | 0.03834387 | 6.8109120  | 0.1051669  | 0.2809338  | 0.07203745  |            |            |            |
| 0.2670999         | 0.1296223  | 4.722990   | 0.04409905 | 0.2980680  | 0.01465386  | 0.08836388 |            |            |
| 0.3197931         | 8.6708450  | 0.01181888 | 0.6529109  | 0          | 0.2233234   | 0.6662776  | 0          |            |
| 0.004782743       | 0.0663103  | 0          | 0.6924488  | 0.2141667  | 0.02204952  | 0.02664942 |            |            |
| 0.1756055         | 0.2790966  | 0.2582944  | 0.8140188  | 0.09401917 | 0.05157387  |            |            |            |
| 0.01383856        | 0.05654721 | 0.01820665 | 0          | 0.1719264  | 0.1260311   | 0.05988482 |            |            |
| 0                 | 0.0321543  | 0.05189969 | 0.1054027  | 0.08562766 | 0.1205374   | 0          | 0          |            |
| 0.03845365        | 0.05182975 | 0.01691236 | 0.2341698  | 0.2991519  | 0.5975794   |            |            |            |
| 0.3533752         | 1.8531     | 0          | 0          | 0          | 1.0434371   | 0.0203040  | 0.04304907 | 0.03391745 |
| 0.2443643         | 0.03748771 | 0.4924813  | 0.09820944 | 0.04876513 | 0.1254704   |            |            |            |
| 1.2721360         | 0.05491774 | 0.05543583 | 0.01173772 | 0.1116617  | 0.2925908   |            |            |            |
| 0.1332975         | 2.7492080  | 0          | 0          | 0.05119011 | 1.7044410   | 0.04013339 | 0.5542766  |            |
| 0.10684           | 0.7704782  | 0.2448416  | 0          | 0.03630084 | 0           | 0.5827634  | 0.1284415  |            |
| 0.1624958         | 0          | 0.3281646  | 0.05705046 | 1.1709030  | 0.4525767   | 0.04654414 |            |            |
| 0.1810847         | 0          | 0          | 0.2505841  | 0.09092763 | 0           | 0.1499508  | 0.345913   |            |
| 0.3052570         | 0.2260076  | 0.1181145  | 0.08500829 | 0          | 1.7540891   | 0.5752120  |            |            |
| 0.1501904         | 0.3339935  | 0.07631426 | 0.1404862  | 0.08861373 | 0.13355     |            |            |            |
| 0.1322971         | 0          | 0.08123776 | 0.02884023 | 1.0110810  | 0.06933567  | 0.1265967  |            |            |
| 0.1251586         | 0.1531257  | 0.2745393  | 0          | 0.09564513 | 0.1042341   | 0.701885   |            |            |
| 0.1201267         | 0.04265842 | 0.1618963  | 2.7559711  | 1.2398130  | 0.2109945   | 0          |            |            |

|              |             |             |             |             |             |             |
|--------------|-------------|-------------|-------------|-------------|-------------|-------------|
| 0.07994827   | 0.3345878   | 0.1141009   | 0.4633769   | 0           | 0.5068752   | 0.3065842   |
| 0.01830591   | 0.1097073   | 0.9040304   | 0.6726961   | 0.1791524   | 0.07478457  |             |
| 0.3152102    | 0           | 0.1442414   | 0           | 0.1772275   | 0           | 0.06470136  |
| 0.7199666    | 0.4087790   | 0.5565798   | 0.1547386   | 0.8349083   | 0.02613095  | 0           |
| 2.2242210    | 0.04102058  | 0           | 0.01385691  | 0.1643145   | 0.1016057   | 0           |
| 0.2254656    | 1.58166     | 0           | 0.07689681  | 0           | 0.02986632  | 0.06503016  |
| 0.1604423    | 0           | 0           | 0.3098171   | 0.8188145   | 0.06050139  | 0.04114024  |
| 0.1443622    | 0.0345441   | 0.1571586   | 0.2235276   | 0           | 0           | 0.3064510   |
| 0            | 1.95627     | 0.06658581  | 0.5968013   | 7.4896150   | 0.06521561  | 0.1850771   |
| 0.1464473    | 0.5708015   | 0.03150776  | 0.4256401   | 0           | 0.1154459   |             |
| TCGA-GC-A3RB | 582         | 0           | 0.1175163   | 0.2513396   | 0.03874405  | 0.1877557   |
| 60.339050    | 0.01552939  | 0.2339602   | 0.2206154   | 0.01055674  | 0.1702844   |             |
| 0.3722798    | 0.7722981   | 0.1674233   | 0.1401451   | 0           | 0.2906509   | 0.1396214   |
| 0.05728585   | 0.2279352   | 0.3512794   | 3.49089253  | 0.019150    | 0.1426360   | 0.05742579  |
| 0.2459241    | 0           | 0           | 0.8656528   | 0           | 0.05343536  | 0.3170179   |
| 0.02278034   | 0.1234128   | 0.09766499  | 0.05914468  | 0.02484245  | 0.1729164   |             |
| 0.09966398   | 0.5242797   | 0.02471276  | 4.5124460   | 0.3389021   | 0.1207086   |             |
| 0.01326526   | 0.2582203   | 0.2227783   | 5.6899070   | 0.08526599  | 0.74098     | 0.3494453   |
| 0            | 0.2933073   | 0.1643645   | 0.006665146 | 1.0169420   | 0.1514892   | 0.1439328   |
| 0.4771315    | 0           | 0.001541248 | 0.08832361  | 0.1921639   | 0.1983493   | 0.0690156   |
| 0.0047370    | 0.09160347  | 0.04527135  | 0.3206535   | 0.8046132   | 2.4920310   | 0.08079426  |
| 0            | 0.004459501 | 0.1336313   | 0           | 0.07248289  | 0.4748879   | 0.08122748  |
| 0.09648996   | 0.06536753  | 0.04144713  | 0.08919877  | 0.1358648   | 0.08278101  |             |
| 0.7380245    | 0           | 0           | 0.08674231  | 0.01670223  | 0.002180015 | 0.2716619   |
| 0.0550870    | 0.04279357  | 0.1633369   | 1.7196080   | 0.00251101  | 0           | 0.1806516   |
| 0.8140777    | 0.7550107   | 0           | 0.06120778  | 0.1870238   | 0.07248289  | 0.4809182   |
| 0.1054939    | 0           | 0.05391076  | 2.6435910   | 0.03539468  | 1.1075860   | 0.003782503 |
| 0.6285861    | 0.1431845   | 0.3712499   | 0.5741575   | 0.05826509  | 0           | 0.1787078   |
| 1.7275090    | 0.07759836  | 1.2168260   | 0.1032881   | 0.3959187   | 0.04508608  | 0.1886877   |
| 1.0411230    | 1.4022140   | 0.2069525   | 0.1245427   | 0.5891248   | 0.1850654   |             |
| 0.07353847   | 1.0341520   | 0.6304211   | 0.08999361  | 0           | 0.05306103  | 0           |
| 0.4395239    | 0.03048073  | 0.04832193  | 0.5833655   | 0           | 0.2330604   | 0.07612525  |
| 0.1095763    | 0           | 0.3617654   | 0.4930359   | 0           | 0.1451974   | 0.1614451   |
| 0.7337175    | 0.04759323  | 0.3156026   | 0.4547520   | 0.1130517   | 0.07853705  | 0           |
| 0.8786230    | 0.1564048   | 0.1087894   | 0.04302144  | 0.009869006 | 0.1497198   | 0           |
| 0.06934909   | 0.8061512   | 0.2154131   | 0.02580737  | 0.1924546   | 0.1290555   |             |
| 0.6289904    | 0           | 0.0543947   | 0           | 0.1030539   | 0.2156431   | 0.1103077   |
| 0.9071436    | 0           | 0.7669081   | 0.3476202   | 0.1769734   | 0.1325752   | 0.1664717   |
| 0.2422808    | 0.09237149  | 0.0722984   | 0.2629053   | 0.1518689   | 0.1422633   | 0           |
| 0.1142237    | 0           | 0           | 0.08731369  | 0.08730993  | 0.6277933   | 0.1317298   |
| 0.7726227    | 0.1097025   | 0.7113884   | 0.1599942   | 0.04748879  | 1.7077370   |             |
| 0.2115033    | 0           | 0.02232708  | 0.2370171   | 0.06548526  | 0.03358963  | 0.1733287   |
| 0.08623676   | 0.3087911   | 0.8672240   | 0.1486808   | 0           | 0.1347427   | 0.05871676  |
| 0.05588291   | 0.1206399   | 0.05964143  | 0           | 0.5590991   | 1.4590150   | 0.07798674  |



|              |            |            |            |            |            |            |            |
|--------------|------------|------------|------------|------------|------------|------------|------------|
| 0.03535338   | 1.2523110  | 0.1437921  | 0.02862488 | 0.2421061  | 0.3102925  |            |            |
| 0.09527625   | 0.03699371 | 0.3041635  | 0          | 0.02189151 | 0.6323162  | 0          |            |
| 0.8876323    | 0.8391006  | 0.1436083  | 0.05112123 | 0.0899046  | 0          | 0.0131387  |            |
| 0            | 0.4673712  | 0          | 0.1264891  |            |            |            |            |
| TCGA-UY-A9PF | 117        | 0          | 0.1278257  | 0.08201669 | 0          | 0.2601208  | 0.1176993  |
| 48.938550    | 0.1486474  | 0.1866223  | 0          | 0.05052457 | 0.4991759  | 0.2055844  |            |
| 1.0899110    | 0.1243378  | 0.07704381 | 0          | 0.1439023  | 0.6682281  | 0.09139003 |            |
| 0.1258728    | 0.1050765  | 1.43272444 | 937330     | 0.07061957 | 0.05496797 | 0          | 0          |
| 0.8091825    | 0.9987624  | 0.08469948 | 0          | 0.2197053  | 0.4334993  | 0.9295225  |            |
| 0.02725667   | 0.1476635  | 0.3375845  | 0.1604043  | 0.0118896  | 0.2112349  |            |            |
| 0.1391226    | 0.06603165 | 0          | 4.4441910  | 0.2432978  | 0.2407130  | 0.03174376 |            |
| 0.3089606    | 0.9995784  | 4.4663780  | 0.2040415  | 0.7224006  | 0.3390091  | 0          |            |
| 0.6070351    | 0          | 0.08430553 | 0.6713218  | 0.09062844 | 0.1722156  | 0.4567103  |            |
| 0.05492633   | 0.09589336 | 0.1909044  | 0.07664139 | 0.4153186  | 0.4128858  |            |            |
| 0.02267128   | 0.08220267 | 0.1895851  | 0.2620131  | 0.5311557  | 7.925085   |            |            |
| 0.04833517   | 0.07954224 | 0.08537269 | 0.2616378  | 0.02808008 | 0          | 0.3788023  |            |
| 0.2915660    | 0.3232607  | 0.1173184  | 0.2479574  | 0.08893861 | 0.3251245  | 0          | 0          |
| 0.1267531    | 0.07680376 | 0.0741337  | 0          | 0.2034543  | 0.4153333  | 0.1977348  |            |
| 0.1024050    | 0.7817305  | 0.7446229  | 0          | 0.0524622  | 0          | 0.8028414  | 1.439891   |
| 0.5245376    | 0.1327889  | 0.08369726 | 0.4239927  | 0          | 0.3912847  | 0.1009788  |            |
| 0            | 0          | 0.8068086  | 0          | 0          | 0.05430918 | 0          | 0          |
| 0.2788567    | 0.06051983 | 0.2434303  | 1.6747710  | 0.04126508 | 0.4541440  | 0.08238949 |            |
| 2.2963220    | 0.0539455  | 0.5805381  | 0.12597    | 0          | 0.7390088  | 0.6933323  |            |
| 0.04741398   | 0.06713218 | 0.1265319  | 0.1759776  | 0          | 0.5178768  | 0.2871396  |            |
| 0            | 0.06348753 | 0.3118398  | 0.3091802  | 0.7011872  | 0.0729404  | 0.1156344  |            |
| 0.2134003    | 0          | 0.4879993  | 0.09108386 | 0.3277701  | 0          | 0.8657045  |            |
| 0.7294678    | 0.6088733  | 0.1158191  | 0.8370655  | 0.3530978  | 0.7770287  |            |            |
| 0.2277812    | 0.1373158  | 0.2720554  | 0.09017755 | 0.3341141  | 0          | 0.1752121  |            |
| 0.1604043    | 0.06508326 | 0.02573758 | 0.02361653 | 0.2931378  | 0.07762608 |            |            |
| 0.2212698    | 0.16076    | 0.1288709  | 0.4940562  | 0.9210876  | 0.1051336  | 0.58299    |            |
| 0.3186934    | 0.1301665  | 0.3320737  | 0.2466080  | 0.3225211  | 0          | 0.6074652  | 0          |
| 0.2764734    | 0.5341386  | 0.53643    | 0.08460065 | 0.3319723  | 0.2746316  |            |            |
| 0.1657837    | 0.06920403 | 0.2287755  | 0          | 0.04044784 | 0          | 0.5808420  | 0          |
| 0.5238909    | 0.3919068  | 0.5516514  | 0.6603165  | 0.1909223  | 0.4801507  |            |            |
| 0.0806034    | 0.03788023 | 3.0729640  | 0.8925528  | 0.2530637  | 0.1907967  |            |            |
| 0.05877158   | 0.3982342  | 0          | 0.16076    | 0.0829551  | 0.06878819 | 0.3187571  |            |
| 0.3236730    | 0.09904748 | 0.2767281  | 0.06555403 | 0.1842510  | 0.5620369  | 0.04457593 |            |
| 0            | 0          | 0          | 0.5733961  | 0.9657129  | 0          | 0.02115016 | 0.09667034 |
| 0.1369987    | 0.3251510  | 0.1856325  | 0          | 0.2655779  | 0.2174137  | 0.2603330  |            |
| 0.4922239    | 0.05134756 | 0.9204451  | 5.0091240  | 0.1592546  | 0.1631108  | 0          |            |
| 0.1129326    | 0.06288183 | 0.1457830  | 0.1215673  | 0.1073320  | 0.05341559 |            |            |
| TCGA-YC-A89H | 573        | 0          | 0.08766594 | 0.03124945 | 0.1059764  | 0.2702985  |            |
| 0.1569574    | 38.009870  | 0.05090512 | 0.1380518  | 0.2399813  | 0          | 0.08662739 |            |
| 0.1979556    | 0.1958259  | 1.32706    | 0.08685298 | 0.06734316 | 0          | 0.246729   |            |

|              |            |            |            |            |            |            |
|--------------|------------|------------|------------|------------|------------|------------|
| 0.1909528    | 0.03482081 | 0.02397961 | 0          | 2.26499    | 46.400960  | 0.134535   |
| 0.03141529   | 0.1345350  | 0.0524516  | 0          | 1.0993430  | 0.03654036 | 0.03139149 |
| 0.2787226    | 0.2335123  | 0.1713550  | 0.3797667  | 0.06678562 | 0.1024595  |            |
| 0.02038542   | 0.06615065 | 0.1590227  | 0.07547681 | 0          | 9.8449050  | 0.0926997  |
| 0.009071096  | 0.9417447  | 0.1142558  | 4.9503550  | 0.3377997  | 0.07750019 | 0          |
| 1.1166890    | 0.4121197  | 0.0325556  | 0.7673475  | 0          | 0.04921231 | 0.522038   |
| 0.03139149   | 0.01686306 | 0.1285888  | 0          | 0.4408167  | 0.3775560  | 0.1957519  |
| 0.007739403  | 0.0534806  | 0.3794576  | 0.2242249  | 0.1381226  | 0.1704749  |            |
| 0.01829707   | 0.1329167  | 0.04814496 | 1.25566    | 0.04329861 | 0.1110905  |            |
| 0.1583571    | 0          | 0          | 0.06607924 | 0.1858151  | 0          | 0.1062481  |
| 0.1440542    | 0.04568552 | 0.01490746 | 0.21157    | 0          | 0.05852651 | 0.3901412  |
| 0.8287353    | 0.0137367  | 0.02998319 | 0          | 0.1058861  | 0.6292967  | 0.6328767  |
| 0.03794576   | 0.05979331 | 0.1884713  | 0          | 0.3551723  | 0.05771137 | 0.0429842  |
| 0.0737309    | 1.08989    | 0          | 0.3420488  | 0.01034626 | 0.04921231 | 0.214921   |
| 0.07833037   | 0.2274934  | 0.3624207  | 0          | 0.1037649  | 0.1015238  | 1.041977   |
| 0.07075145   | 0.3969624  | 0.09417447 | 0.2202619  | 0          | 0.0737309  | 0.4879619  |
| 0            | 0.7191505  | 0.1132152  | 0.09677869 | 0          | 0.07231547 | 0          |
| 0.2293548    |            |            |            |            |            |            |
| 1.0294850    | 0.03192355 | 0.07256877 | 0          | 0.1767026  | 1.04193    | 0          |
| 0            |            |            |            |            |            |            |
| 0.2947428    | 0          | 0.07968609 | 0          | 0.1498617  | 0          | 0.06184592 |
| 0.7069265    |            |            |            |            |            |            |
| 0.02676794   | 0.03309646 | 0.1471999  | 0.4036049  | 0.2775546  | 0.1301815  |            |
| 0.2354362    | 0.5830689  | 0          | 0.01193455 | 0.05084266 | 0.5607682  | 0.1222323  |
| 0            | 0.1176763  | 0          | 0.3164533  | 0.04436485 | 0.0737684  | 0.4134489  |
| 0.2504177    | 0.1411815  | 0.2632099  | 0.04506445 | 0.2847263  | 0.09106982 | 0          |
| 0.03163112   | 0.2818828  | 0.2949236  | 0.05028734 | 0.3012283  | 0          | 0.245188   |
| 0.3403019    | 0.1774939  | 0.06043869 | 0.07589151 | 0.1220780  | 0.2526632  |            |
| 0.09228678   | 0.1797809  | 0.05192577 | 0.05779186 | 0.03647603 | 0.5662895  | 0          |
| 0            | 0.1194143  | 0.1211914  | 0.3733042  | 0.3603197  | 0.6792912  | 0.02727898 |
| 0.2993625    | 0.05758305 | 0.1515451  | 0.2408760  | 0.1961968  | 0.03615774 | 0          |
| 0.07328536   | 0.1724233  | 0.08956073 | 0.04593876 | 0.04741049 | 0.03931382 |            |
| 0.1656146    | 0.6677528  | 0          | 0.06778097 | 0.03746543 | 0.1842804  | 0.2409114  |
| 0.0764281    | 0.09428161 | 0          | 0          | 0.3823252  | 0.7217469  | 0.05332917 |
| 0.03626321   | 0.4419922  | 0.1041125  | 0.05654818 | 0.1148769  | 0.1667171  |            |
| 0.02606086   | 0          | 0.1998905  | 0          | 0.02993986 | 0.7762230  | 1.0521051  |
| 1.246311     |            |            |            |            |            |            |
| 0.09580755   | 0.09322107 | 0          | 0.06454325 | 0.01796911 | 0          | 0.3890776  |
| 0            |            |            |            |            |            |            |
| 0.07123216   |            |            |            |            |            |            |
| TCGA-XF-AAMQ | 2177       | 0          | 0.1946938  | 0.09463724 | 0.0962831  | 0.1882744  |
| 0.05432423   | 49.815150  | 0.1157766  | 0.1938054  | 0.2436679  | 0.0349795  |            |
| 0.3579354    | 0.3083850  | 0.3608833  | 0.07173531 | 0.0376514  | 0.06284924 |            |
| 0.0207557    | 0.3469741  | 0.03163588 | 0.01452419 | 0.07274723 | 2.077817   |            |
| 48.388080    | 0.2240875  | 0.02854184 | 0.4074317  | 0.09530808 | 0          | 0.6914699  |
| 0.02931985   | 0.1106605  | 0.1140809  | 0.4314270  | 0.1025410  | 0.1698347  | 0.1789049  |
| 0.1483215    | 0.1273834  | 0.02469445 | 0.07612677 | 0.2201561  | 0.06857321 |            |
| 0.02047128   | 4.04311    | 0.1684416  | 0.06666081 | 0.03845984 | 0.3565028  |            |
| 0.2998817    | 4.1204210  | 0.1177195  | 0.9320739  | 0.6962917  | 0          | 0.2101333  |

|              |             |             |            |            |             |
|--------------|-------------|-------------|------------|------------|-------------|
| 0.0226924    | 0.02129605  | 1.2200320   | 0.1788441  | 0.07904817 | 0.01901348  |
| 0.04596198   | 0.08260512  | 0.2387739   | 0.1437681  | 0.5717038  | 0.01961991  |
| 0.09485183   | 0.09375344  | 0.3433617   | 0.9652998  | 4.1286420  | 0.1338549   |
| 0.1376730    | 0.007388223 | 0.2113287   | 0.03888117 | 0.06004257 | 0.3802696   |
| 0.1009295    | 0.2078161   | 0.08122264  | 0.2231678  | 0.2001174  | 0.05627308  |
| 0.1828619    | 0.4182966   | 0.04387726  | 0          | 0.05132473 | 0.02767122  |
| 0.012641     |             |             |            |            |             |
| 0.2781698    | 0           | 0.2835909   | 0.2591724  | 2.61831    | 0.006240128 |
| 0            |             |             |            |            |             |
| 0.1282681    | 0.7329963   | 0.2421009   | 0.04596666 | 0.05794585 | 0.4076965   |
| 0.02001419   | 0.6374043   | 0.08738786  | 0.05207011 | 0.1116452  | 0.6405370   |
| 0.05863971   |             |             |            |            |             |
| 0.1479823    | 0.006266615 | 0.08942207  | 0.1041402  | 0.04744385 | 0.1757325   |
| 0.6585427    | 0           | 0.06284924  | 0.09565403 | 1.6952020  | 0.04999561  |
| 0.3883962    |             |             |            |            |             |
| 0.3707629    | 0.6892861   | 0.1867395   | 0.0669870  | 0.3682302  | 0           |
| 1.313659     |             |             |            |            |             |
| 0.2742928    | 0.2415053   | 0           | 0.2847045  | 0.1218340  | 0.4399060   |
| 0.8807611    | 0           | 0           |            |            |             |
| 0.1318623    | 0.1079475   | 0.4281074   | 0.4611780  | 0.02524929 | 0           |
| 0.7017779    |             |             |            |            |             |
| 0.09778362   | 0.07239749  | 0.06305979  | 0.2042316  | 0          | 0.3745940   |
| 0.6367769    |             |             |            |            |             |
| 0.01621305   | 0.1603693   | 0.1783147   | 0.6518908  | 0.4707130  | 0.07096455  |
| 0.2376685    | 0.5415096   | 0.03121616  | 0.05782902 | 0.04619226 | 0.3760424   |
| 0.07403479   | 0.1126472   | 0.08018465  | 0.05722624 | 0.6201162  | 0           |
| 0.05106367   |             |             |            |            |             |
| 0.4451937    | 0.2988895   | 0.1924022   | 0.2505225  | 0.04549174 | 0.4219658   |
| 0.1379       | 0.06758832  | 0.05747587  | 0.08536665 | 0.3126060  | 0.1522924   |
| 0.4112872    |             |             |            |            |             |
| 0            | 0.3547683   | 0.2182417   | 0.1563726  | 0.1098212  | 0.2757999   |
| 0.24295      |             |             |            |            |             |
| 0.1530353    | 0.09981624  | 0.1418887   | 0.03145087 | 0.09217693 | 0.04418626  |
| 0.2483759    | 0           | 0           | 0.1808198  | 0.2677098  | 0.6557082   |
| 0.3819230    | 0.7543053   |             |            |            |             |
| 0.4543709    | 0.7403925   | 0.1046323   | 0.06556373 | 1.7396710  | 0.02376685  |
| 0.08760138   | 0           | 0.02959209  | 0.1378541  | 0.01808198 | 0           |
| 0            |             |             |            |            |             |
| 1.0083940    | 0.1779015   | 0.1361544   | 0.1116166  | 0.04863914 | 0.04629166  |
| 0.1713160    | 0.5928613   | 0.006491928 | 0          | 1.2343180  | 0.03230089  |
| 0.0732141    | 0           |             |            |            |             |
| 0.1541461    | 0.05005859  | 0.3253873   | 0.4498142  | 0.4577585  | 0.03064444  |
| 0.2715928    | 0.3604710   | 0.01813424  | 0.4007317  | 0.01777464 | 1.0048923   |
| 0.266151     |             |             |            |            |             |
| 0.1392710    | 0.3528936   | 0           | 0.1172794  | 0.03265108 | 0.06728631  |
| 0.2861586    |             |             |            |            |             |
| 0.0030962    | 0.04930804  |             |            |            |             |
| TCGA-CF-A1HR | 389         | 0           | 0.05590706 | 0.2192153  | 0.1351683   |
| 0.1379017    |             |             |            |            |             |
| 0.02859892   | 30.0187     | 0           | 0.05417818 | 0.1360381  | 0.1282787   |
| 0.09207458   |             |             |            |            |             |
| 0.7240346    | 0.1498605   | 0.5526882   | 0.04028263 | 0.06607177 | 0.04411587  |
| 0.1136389    | 0.1623681   | 0.1221342   | 0.1835098  | 0          | 2.501465    |
| 26.36718     |             |             |            |            |             |
| 0.06863742   | 0.1001721   | 0.1715935   | 0.06689976 | 0          | 0.8359057   |
| 0.4321912    |             |             |            |            |             |
| 0.09321131   | 0           | 0.6319977   | 0.1042422  | 0.1788185  | 0.4305565   |
| 0.1325056    |             |             |            |            |             |
| 0.1238046    | 0.008666909 | 0.1096840   | 0.05795045 | 0.1444011  | 0.08621666  |
| 3.56087      |             |             |            |            |             |
| 0.1182345    | 0.1052805   | 0.03470938  | 0.3002887  | 0.3886089  | 2.931766    |
| 0.1983145    | 0.7180817   | 0.1482722   | 2.6822780  | 0.4978098  | 0.04778554  |
| 0.05481071   | 0.3058496   | 0.06606351  | 0.1255364  | 0.04161481 | 0.08007699  |
| 0.0376392    | 0.1093397   | 0.1117353   | 0.4324944  | 0.7825291  | 0.008263104 |
| 0.09986926   | 0.08884148  | 0.1500668   | 1.06476    | 1.31555    | 0.1409355   |
| 0.01449556   |             |             |            |            |             |
| 0.03111617   | 0.04238237  | 0.08187577  | 0          | 0.3313530  | 0.07084559  |
| 0.3029664    | 0           |             |            |            |             |

|              |             |             |             |             |              |             |             |
|--------------|-------------|-------------|-------------|-------------|--------------|-------------|-------------|
| 0.07229933   | 0.1361466   | 0           | 0           | 0.3387873   | 0.1847930    | 0           | 0.02913496  |
| 0.04943593   | 0.1316334   | 0.04804619  | 0.1492961   | 0.4334007   | 0.8856082    | 0           |             |
| 0            | 0           | 0.2701064   | 1.54354     | 0.5098149   | 0.09679636   | 0.04575828  | 0.3090691   |
| 0.1685831    | 0.6375653   | 0.2576293   | 0           | 0.04702029  | 2.1386270    | 0.4985926   |             |
| 0.02639242   | 0.1255364   | 0.1644735   | 0.09990702  | 0.2901580   | 0.4622520    | 0           |             |
| 0.1294893    | 2.0862160   | 0.01504007  | 0.1947340   | 0.06005774  | 0.6672195    | 0.07864704  |             |
| 0.5642435    | 0.14284     | 0.0734039   | 0.6842942   | 2.2382170   | 0.1234371    | 0.04893594  |             |
| 0.4150587    | 0           | 0.2437768   | 0.5416387   | 0           | 0            | 0           | 0.1690324   |
| 1.0222590    | 0.05316983  | 0.08429156  | 0.2527817   | 0.06863742  | 0.05081809   | 0           |             |
| 0.09557109   | 0           | 0.5521727   | 0.6380938   | 0.03414135  | 0.04221311   | 0.1408103   |             |
| 1.4585450    | 0.2614220   | 0.7471839   | 0.2502406   | 0.2478931   | 0            | 0.09133205  |             |
| 0.06484762   | 0.4342503   | 0.1559021   | 0.1423271   | 0.1219490   | 0.06886099   |             |             |
| 0.2611675    | 0.1131709   | 0.1612944   | 0.6445221   | 0.2254567   | 0.1800709    |             |             |
| 0.04795899   | 0.0670574   | 0.3245225   | 0.2323113   | 0.04744238  | 0            | 0.269647    |             |
| 0.4231827    | 0.1924180   | 0.6446809   | 0           | 0.2015350   | 0.2680838    | 0.9878656   |             |
| 0.1233391    | 0.09679636  | 0.06673082  | 0           | 0.08407701  | 0.09727996   | 0.06622909  |             |
| 0.06879696   | 0.0465236   | 0.3486858   | 0           | 0.1059134   | 0            | 0.2773247   |             |
| 0.3332934    | 0.4021257   | 0.5294708   | 0.2957419   | 0.5727361   | 0.01468894   |             |             |
| 0.08283826   | 1.9211410   | 0.1501443   | 0.1844705   | 0.3477027   | 0.1908393    |             |             |
| 0.2023250    | 0.03807695  | 0.1757788   | 0           | 0           | 0.4119068    | 0.3913170   | 0.2166017   |
| 0.08645171   | 0           | 0.1007322   | 0           | 0.08935735  | 0.0901891    | 0.2080741   |             |
| 0.06835335   | 0.02322092  | 1.6786630   | 0.06801906  | 0.1387565   | 0.07046775   |             |             |
| 0.07377277   | 0.05548059  | 0.1379017   | 0.3672880   | 0.2326765   | 0.0645309    |             |             |
| 0.1998271    | 0.1423271   | 0.0381872   | 0.2724390   | 0.1122893   | 1.3935274    | 0.139298    |             |
| 0.07331904   | 0.1188995   | 0.07841367  | 0.08232214  | 0.06875648  | 0.07084559   |             |             |
| 0.4785285    | 0.01303992  | 0.1168117   |             |             |              |             |             |
| TCGA-E7-A3X6 | 904         | 1           | 0.166278174 | 0.08890741  | 0            | 0.307609199 | 0.042529302 |
| 38.123243649 | 0           | 0.171207144 | 0.227589238 | 0.190762501 | 0.013692361  |             |             |
| 0.209819988  | 0.297142345 | 0.590740345 | 0.164736214 | 0.06386573  | 0            | 0.188490767 |             |
| 0.45273128   | 0.024767064 | 0.068224089 | 0.113904566 | 1.468552051 | 27.083704362 |             |             |
| 0.140346697  | 0.119172328 | 0.191381859 | 0.099486266 | 0           | 1.042575463  | 0           |             |
| 0.103960516  | 0           | 0.146850057 | 0.077509024 | 0.118186692 | 0.120052164  | 0.147786278 |             |
| 0.061369717  | 0.006444256 | 0.067439904 | 0.043088898 | 0.17894843  | 0            | 6.330531862 |             |
| 0.219782299  | 0.156562052 | 0.06021881  | 0.111639418 | 0.108355906 | 1.698094306  |             |             |
| 0.147456192  | 0.711903535 | 0.036749135 | 0.369333413 | 0.29817247  | 0.035530809  |             |             |
| 0.024699607  | 0.54579271  | 0           | 0.093342221 | 0.154712894 | 0.029770511  | 0.011994224 |             |
| 0.118253376  | 0.124620746 | 0.225105995 | 0.313302421 | 0.055296072 | 0.118812019  |             |             |
| 0.02935904   | 0.304313953 | 1.439453302 | 1.275879063 | 0.02619805  | 0.032334401  |             |             |
| 0.028920426  | 0.094539876 | 0.182635516 | 0.03133738  | 0.164251098 | 0.052677044  |             |             |
| 0.325389794  | 0           | 0.215031875 | 0.086769793 | 0.088110034 | 0            | 0.352666059 | 0           |
| 0.09643454   | 0.021663217 | 0.005655069 | 0.406183965 | 0.071449228 | 0.055504343  |             |             |
| 0.465477883  | 1.741816304 | 0.058623185 | 0           | 0           | 0            | 0.596801375 | 0.315892887 |
| 0.107958998  | 0.14176434  | 0.217040376 | 0.156686902 | 0.187128929 | 0.21892521   | 0           |             |
| 0.069923621  | 1.391398715 | 0.091815596 | 0.231704452 | 0.009812004 | 0.046671111  |             |             |

|              |             |             |             |             |             |             |
|--------------|-------------|-------------|-------------|-------------|-------------|-------------|
| 0.244587605  | 0.111428379 | 0.171971605 | 0.400990563 | 0           | 0.065604466 | 0.124809222 |
| 1.263941013  | 0.08946403  | 0.796366666 | 0.044655767 | 0.892126291 | 0.087716686 |             |
| 0.069923621  | 0.151726159 | 0           | 1.407333269 | 0.536845289 | 0.110137542 | 0           |
| 0.377197056  | 0.238453126 | 0.326267229 | 0.61020303  | 0           | 0.030275096 | 0.068821498 |
| 0            | 0.209472682 | 0.342044174 | 0.039534281 | 0.125349522 | 0.404826381 | 0.102070325 |
| 0.415642141  | 0           | 0.142123237 | 0           | 0.645175861 | 0.422881911 | 0           |
| 0.383896826  | 0.318969766 | 0.340164294 | 0.111113313 | 0.260491975 | 1.253377631 | 0           |
| 0.16977423   | 0           | 0.398858665 | 0.115920576 | 0.105826953 | 0.146474721 | 0.038401051 |
| 0.335419779  | 0.168295825 | 0.039976679 | 0.522799226 | 0.50989806  | 0.234309647 |             |
| 0.356597778  | 0.089036331 | 0.511321592 | 0.043183599 | 0           | 0.059995535 | 0.801981125 |
| 0.209770864  | 0.143071876 | 0.39703797  | 0.036760594 | 0.335872437 | 0.327475626 |             |
| 0.030605199  | 0.057317788 | 0.107958998 | 0.38040098  | 0.179712234 | 0.118778942 |             |
| 0.273829211  | 0.344711185 | 0.076730691 | 0           | 0.129632199 | 0           | 0.11812748  |
| 0.169872083  | 0.197753023 | 0.247819393 | 0.341713697 | 0.823162776 | 0.155222153 |             |
| 0.579637773  | 0.109219219 | 0.102656936 | 0.164822169 | 0.111639418 | 0.171453207 | 0           |
| 0.020271152  | 0.228927701 | 0.056624028 | 0.043566602 | 0.044962329 | 0           | 0.722488192 |
| 0.785171308  | 0.053684529 | 0.12856186  | 0.035530809 | 0.249663756 | 0.076157122 |             |
| 0.108722311  | 0.067059855 | 0           | 0           | 0.01726585  | 1.248165296 | 0           |
| 0.366772701  | 0.120677785 | 0.049502929 | 0.211481324 | 0.359336825 | 0.024715142 | 0           |
| 0.245926937  | 0.105826953 | 0.056787681 | 0.494054251 | 0.139153949 | 0.959401249 |             |
| 4.060775781  | 0.199892637 | 0.22101842  | 0           | 0.183631192 | 0.059644303 | 0.026338522 |
| 0.408520902  | 0.029087398 | 0.028951676 |             |             |             |             |
| TCGA-DK-A6AW | 1621        | 0           | 0.1482693   | 0.1233217   | 0           | 0.1676237   |
| 83.579660    | 0.2394736   | 0.2705866   | 0           | 0.1465128   | 0.07877694  | 0.17664     |
| 0.8550302    | 0.02670806  | 0.02920446  | 0.07799882  | 0           | 0.3588425   | 0.009815398 |
| 0.2974156    | 0           | 1.93214     | 147.06720   | 0.02275388  | 0.3719284   | 0.1516925   |
| 0.05914088   | 0           | 1.3587310   | 0.2729047   | 0           | 0.1061848   | 0.2095125   |
| 0.1405152    | 0.7136654   | 0.2259088   | 0.1459280   | 0.03064696  | 0.0372935   |             |
| 0.03842212   | 0.2127563   | 0.03810872  | 11.431810   | 0.3102343   | 0.07159568  |             |
| 1.5927710    | 1.1717695   | 11.659370   | 0.5501601   | 0.1019480   | 1.22243     | 0.08448697  |
| 0.08516138   | 1.2978140   | 0.05548847  | 0.4414610   | 0           | 0.2767953   | 0.09877652  |
| 0.2294008    | 0.2128533   | 0.02921907  | 0.1236013   | 0.1047171   | 0.1809033   |             |
| 0.2994955    | 5.3598020   | 0.09344258  | 0           | 0.03438423  | 0.1686013   | 0.0904750   |
| 0.3905646    | 0.1252582   | 0.1785527   | 0           | 0.06391422  | 0.06877521  | 0           |
| 0.1197982    | 0           | 0           | 0.05732674  | 0.2575595   | 0.01008518  | 0.2152787   |
| 0.2973173    | 0.1979716   | 0.7840095   | 0.3788213   | 0.003872144 | 0           | 0           |
| 0.1591867    | 1.9103331   | 0.0516050   | 0.08557013  | 0.04719322  | 0.2580448   | 0.1490312   |
| 0.2521467    | 0.09760716  | 0           | 0.04156699  | 4.0293270   | 0.1091619   | 0.8815338   |
| 0.1341560    | 0.3392625   | 0.2208001   | 0.07806709  | 0.06810684  | 0           | 0.03899941  |
| 0.1823063    | 0.8606554   | 0.05318303  | 0.5508774   | 0           | 1.56255     | 0           |
| 0.06313688   | 0           | 0.8366072   | 0.1914807   | 0.1134859   | 0.1297814   | 0.04076902  |
| 0.0567006    | 0.5603107   | 1.9152830   | 0           | 0.1636473   | 0           | 0           |
| 0.1031375    | 0           | 0.3593946   | 0           | 0.4646783   | 0.04350213  | 0.5578662   |
| 0.4823371    | 0           | 0.1119520   | 0.3319452   | 0.6826163   | 0.06259035  | 0.3889771   |

|              |            |            |            |            |            |            |
|--------------|------------|------------|------------|------------|------------|------------|
| 0.1769746    | 0.3506288  | 0          | 0.05382637 | 0          | 0.3161421  | 0.2756418  |
| 0.04194012   | 0.0414637  | 0.04565599 | 0.1259334  | 0          | 0.1307055  | 0          |
| 0.1411770    | 0.03979667 | 0.2119841  | 0.03810872 | 1.2841520  | 0.1540262  | 0.6710419  |
| 0.07133022   | 0          | 0          | 0.6102091  | 0          | 0.2549551  | 0.3724161  |
| 0.02725863   | 0.2139253  | 0.25563    | 0          | 0.01486519 | 0.2211368  | 0.175644   |
| 0.1064316    | 0          | 0.6605272  | 0.07709784 | 0          | 0.06732175 | 0.1687995  |
| 0.1262738    | 0.8633282  | 0.1702051  | 0.1076527  | 0.4359904  | 0.0519414  |            |
| 0.2441029    | 0.2784713  | 2.78735    | 0.08153803 | 0          | 0.04820178 | 0.4510378  |
| 0.06732175   | 0.05179744 | 0.05345686 | 0          | 0.1120415  | 0.5646846  | 0          |
| 0.2802259    | 0          | 0.1187326  | 0          | 0.02872505 | 0.02657639 | 0          |
| 0.02417035   | 0          |            |            |            |            |            |
| 1.0052740    | 0.06013036 | 0.02725863 | 0.9967209  | 0.1304335  | 0.01471382 |            |
| 0.5066807    | 0.4272247  | 0.05876892 | 0.02852338 | 0.5421376  | 0.2097006  |            |
| 0.06751632   | 0.6989985  | 0.06617747 | 1.9163033  | 0.0470410  | 0.04321044 | 0.1576647  |
| 0.1386388    | 0.1455492  | 0.06078225 | 0.03131454 | 0.4700331  | 0          | 0.09179036 |
| TCGA-GC-A3BM | 651        | 1          | 0.2628799  | 0.3255061  | 0.1003537  | 0.3967341  |
| 0            |            |            |            |            |            |            |
| 86.978480    | 0.09640855 | 0.2916223  | 0.2272487  | 1.1428630  | 0.1093750  | 0.121293   |
| 0.2596105    | 1.1797130  | 0.5458069  | 0.02943239 | 0          | 0.1946987  | 0.1205477  |
| 0.1154067    | 0.2043660  | 0.1706012  | 2.5074985  | 7.690320   | 0.1910955  | 0.1338683  |
| 0.1273970    | 0          | 1.3012690  | 0.2422116  | 0.08917791 | 0.7918039  | 0.3372126  |
| 0.1032586    | 0.4395327  | 0.3091842  | 0.07659737 | 0.06434615 | 0.1644324  |            |
| 0.3549515    | 0.07147228 | 0.03200512 | 3.97551    | 0.04389069 | 0.1563278  |            |
| 0.03435926   | 0.4458895  | 0.3967105  | 5.9843070  | 0.5153245  | 3.0566050  | 0.1100825  |
| 0            | 0.4619892  | 0.5321647  | 0.01726386 | 0.5903908  | 0.0980957  | 0.4194115  |
| 0.5252368    | 0          | 0.02195651 | 0.4058878  | 0.08295619 | 0.7064175  | 0.04469052 |
| 0            | 0.3336588  | 0.2711648  | 0.3342445  | 5.4617392  | 4.630090   | 0.2092708  |
| 0.01076201   | 0.01732629 | 0.1887969  | 0.07598428 | 0.09387148 | 0.5740187  |            |
| 0.2629912    | 0.4498656  | 0          | 0.3489040  | 0.2502932  | 0          | 0.03573614 |
| 1.458859     |            |            |            |            |            |            |
| 0.06859839   | 0.04156597 | 0.2567740  | 0.08652322 | 0.01693982 | 0.3860304  |            |
| 0.07134233   | 0          | 0.4588227  | 3.1178530  | 0.04227562 | 0          | 0.08530061 |
| 0            |            |            |            |            |            |            |
| 1.0543       |            |            |            |            |            |            |
| 0.5046724    | 0.03593249 | 0.1811869  | 0.3951874  | 0.1251621  | 0.8809460  | 0.3005718  |
| 0            | 0.2094572  | 0.4809230  | 0.04583911 | 0.1850862  | 0.04408795 | 0.1398038  |
| 0.2442217    | 0.2225233  | 0.08117404 | 0.4575893  | 0          | 0.06550631 | 0.2100779  |
| 2.6732510    | 0.08933018 | 0.5493937  | 0.04458895 | 0.5562015  | 0.0583903  |            |
| 0.0698190    | 0.2499736  | 0.1089952  | 1.3836090  | 0.3216252  | 0.4838801  | 0          |
| 0.4108720    | 0.2380964  | 2.6786281  | 0.2795090  | 0          | 0          | 0.0843834  |
| 0.1673274    |            |            |            |            |            |            |
| 0.2656363    | 0.07895026 | 0          | 0.7170105  | 0.1528764  | 0.3018329  | 0.147883   |
| 0.3902541    | 0.03653471 | 0.6442106  | 1.0710710  | 0.1567024  | 0.3833224  |            |
| 1.1465730    | 0.7601810  | 0.07396471 | 0.9660943  | 0.5704630  | 0.04880383 | 0.2486297  |
| 0.1203628    | 0.5499807  | 0.08681035 | 0.1761144  | 0.04178731 | 0.1150308  |            |
| 0.5464450    | 0.1260330  | 0.1796259  | 0.3480114  | 0.4463651  | 0.3342273  | 0.9613735  |
| 0.2098114    | 0.6597079  | 0.2155949  | 0.1408915  | 0.08985866 | 0.1334635  |            |
| 0.4538235    | 0.1904771  | 2.0837480  | 0.0183528  | 1.0499660  | 0.4454587  | 0.1222376  |
| 0.1831425    | 0          | 0.1321154  | 0.8374023  | 0.2684133  | 0.4900916  | 0.2458539  |
| 0.1970123    | 0.1036222  | 0.1479294  | 0          | 0          | 0.1130786  | 0.3831006  |

|                           |                                   |                            |                                          |
|---------------------------|-----------------------------------|----------------------------|------------------------------------------|
| 0.3534980.3838527         | 1.57239                           | 0.0516633                  | 1.0158010.3380730.1230040.5428106        |
| 0.07431492                | 0.4108720                         | 0.02313237                 | 0.2547092 0.02826965 0.04350142          |
| 0.08979011                | 0.03722797                        | 1.1840491.2518310.05360421 | 0.2567390 0.2492902                      |
| 0                         | 0.1206218                         | 1.1829520.07724071         | 0 0.8361408 2.2513770.2019989            |
| 0.09157125                | 0.2615885                         | 0.2957659                  | 0.06590515 0.3743378 0.7893582           |
| 0.1480690.1197750.7059821 | 0.07044574                        | 0.1134054                  | 0.3551868 0.0555783                      |
| 1.3028343.1783240.3492887 | 0.06620632                        | 0                          | 0.6111882 0.0510472                      |
| 0.07889735                | 0.3684346                         | 0.009681293                | 0.1349057                                |
| TCGA-GV-A6ZA              | 691 0                             | 0.2652681                  | 0.2502995 0.05658946 0.4618704           |
| 0.02394641                | 36.6177 0                         | 0.1701164                  | 0.7973506 0 0.01541915 0.07461508        |
| 0.9620208                 | 3.0080440.2192410.1825663         | 0.03693903                 | 0.2415395 0.1019653                      |
| 0.1394526                 | 0.2048748                         | 0                          | 6.403456101.29670.1293106 0.03355039     |
| 0.1436784                 | 0.1680492                         | 0                          | 2.3481160.1033948 0.1951189 0 0.9591448  |
| 0.1246913                 | 0.1164552                         | 0.4055770.6339965          | 0.1785322 0.06531266                     |
| 0.09713892                | 0.09704596                        | 0.6851551                  | 0.0360954 18.337850.1979998              |
| 0.4407665                 | 0.0581256                         | 2.3257950.5287578          | 4.7045230.2905917 0.4810104              |
| 0.1793293                 | 0                                 | 1.4704671.64048            | 0.005562911 1.0755930 0.05255696 1.21957 |
| 0                         | 0.02251142                        | 0.19975                    | 0.2338951 0 0.25201 0.0276754 0.2174182  |
| 0.1818388                 | 0.3541150.7699692.7777830.2065138 | 0.0121374                  | 0.01302707                               |
| 0.1596939                 | 0.03427805                        | 0.03528944                 | 0.4624134 0.5932032 0.2536794            |
| 0.04773782                | 0.2118815                         | 0.04342783                 | 0.5953313 0.2015162 0.6240802 0          |
| 0.1875125                 | 0.3438880.04879047                | 0.0127365                  | 0.5070077 0 0 0.4804991                  |
| 1.4113110.003667575 0     | 0                                 | 0.03769417                 | 5.1697380.8181817 0 0.08301421           |
| 0.5894644                 | 0.3528944                         | 1.5874870.3081682          | 0 0.4724515 2.697259                     |
| 0.1550921                 | 0.4696658                         | 0.005524714                | 0.1051139 1.6985060.3764429              |
| 0.0387319                 | 0.6450869                         | 0                          | 0.03693903 0.3975538 2.3161640.1259333   |
| 0.7500501                 | 0.2011498                         | 1.1810590.3951157          | 0.1181129 0.2221191 0                    |
| 1.3653810.1209097         | 0.07855065                        | 0.04097496                 | 0.8109181 0.05370505                     |
| 0.4898851                 | 1.5942060.04381481                | 0.03409319                 | 0.0775008 0.09516765 1.17945             |
| 1.8403070.04452008        | 0                                 | 0.4830161                  | 0.05747137 0.1276528 0.2223767           |
| 0.2000586                 | 0                                 | 1.3870330.6581805          | 0 0.1767291 0.3930103 1.86782            |
| 0.4104252                 | 0.03475727                        | 0.8800304                  | 1.2453930.05504099 0.1784393             |
| 0.05429811                | 1.2191490.2610794                 | 0.2383463                  | 0.0314185 0.08648787                     |
| 0.09940018                | 0.04738004                        | 0.1350548                  | 0.4415484 0.5112766 0.4146359            |
| 0.3614125                 | 0.2085512                         | 2.2126480.5349259          | 0.3177950.1689044 0.2257804              |
| 0.9449030.2148202         | 0.8996720.04139659                | 0.8350164                  | 0.2886062 0.05169738                     |
| 0.1290926                 | 0.04052469                        | 0.01862498                 | 0.5396702 0.1900779 0.4770895            |
| 0.1109097                 | 0.1728149                         | 0                          | 0.6047765 0 0.04434164 0.06376507        |
| 0.1142012                 | 0.07973506                        | 1.4911321.6524330.2476301  | 0.3330295 0.1721905                      |
| 0.3236893                 | 0.6284636                         | 0.04190621                 | 0.1158454 0 0.04891631 0.4124776         |
| 0.0956476                 | 0.09812186                        | 0.05063268                 | 0.08397146 0.9108822 2.214093            |
| 0.06045486                | 0.2171628                         | 0.04001172                 | 0.1968048 0.2572846 0.2448673            |
| 0.2265510.1742242         | 0.0114467                         | 0.2041547                  | 1.5415990.08543042 0.1032741             |
| 0.05900394                | 0.2100224                         | 0.01858197                 | 0.4510453 0.6150740.4453128              |

|                    |                   |                   |                            |                            |                    |                  |
|--------------------|-------------------|-------------------|----------------------------|----------------------------|--------------------|------------------|
| 0.08104937         | 0.7500501         | 0                 | 0.1278987                  | 0.5841791                  | 0                  | 3.6733413.465911 |
| 0.2455655          | 0.2737810.2626288 | 0.6203686         | 0.03838071                 | 0                          | 0.7420013          |                  |
| 0.01091857         | 0.1086762         |                   |                            |                            |                    |                  |
| TCGA-G2-A2EJ       | 1460              | 0                 | 0.1076862                  | 0.1612207                  | 0.1562138          | 0.3486279        |
| 0.04957761         | 41.187210         | 0.07044035        | 0.6485287                  | 0.2965030.1383336          |                    |                  |
| 0.5578439          | 0.1154624         | 0.4191738         | 0.1163865                  | 0.03436158                 | 0                  | 0.05556366       |
| 0.09382429         | 0.05774333        | 0.0530205         | 0                          | 0.98798121.203760.07436641 |                    |                  |
| 0.3820370.3966209  | 0.03865798        | 0                 | 0.2493045                  | 0                          | 0                  | 0.04627243       |
| 0.4793243          | 0.1204726         | 0.04592452        | 0.0932988                  | 0.1421982                  | 0.03577021         |                  |
| 0.2353839          | 0.0865392         | 0.04185829        | 0.0834421                  | 0                          | 3.9915250.03416086 |                  |
| 0.02027876         | 0                 | 0.1735216         | 0.1684181                  | 2.3927720.05729795         | 1.051189           |                  |
| 0.01903978         | 0                 | 0.2477064         | 0.08283854                 | 0.01631605                 | 0.3888170.07634952 | 0                |
| 0.1683296          | 0                 | 0.004660668       | 0.06318185                 | 0.1291324                  | 0.07497498         | 0.1043501        |
| 0.009549658        | 0.1385025         | 0.1197863         | 0.1261324                  | 0.3076354                  | 0.3305174          |                  |
| 0.1832388          | 0.0167525         | 0                 | 0.06122656                 | 0                          | 0                  | 0.06382405       |
| 0.01945211         | 0.2306134         | 0.1044453         | 0.1948074                  | 0.2054247                  | 0.02781403         |                  |
| 0.1957680          | 0.03235149        | 0.08118967        | 0.2020274                  | 0.002197425                | 0.2890442          |                  |
| 0.08329038         | 0                 | 0.2040625         | 0.6438121                  | 0.1670502                  | 0.02209827         | 0.06639088       |
| 0.02601346         | 0.3924508         | 0.1718478         | 0.1957680.1366139          | 0.4365664                  |                    |                  |
| 0.1217696          | 0.5138444         | 0.04253455        | 0.1267212                  | 0.1086826                  | 0.7492062          | 0                |
| 0.1800696          | 0.03431439        | 0                 | 0.1900818                  | 0.1731936                  | 0.06560907         | 0.1780747        |
| 0                  | 0                 | 0.1413367         | 0.9019066                  | 0.07821806                 | 0.5963927          | 0.03470433       |
| 0.4295189          | 0.1136154         | 0.05434129        | 0.1179143                  | 0.0424164                  | 0.5384429          |                  |
| 0.6675368          | 0.03138433        | 0.0282776         | 0.1065962                  | 0.2594401                  | 0.112693           |                  |
| 0.6544244          | 0.1814246         | 0                 | 0.08022716                 | 0                          | 0.1302337          | 0.4725695        |
| 0.2457932          | 0.07306174        | 0.3932646         | 0.03966209                 | 0.0587304                  | 0.1150998          |                  |
| 0.3313541          | 0                 | 0.5925634         | 0.7908821                  | 0                          | 0.02439282         | 0.1084895        |
| 0.2478880.4531876  | 0.05277064        | 0.1156811         | 0.4870326                  | 0.1139545                  |                    |                  |
| 0.02638808         | 0                 | 0.2878329         | 0.06756594                 | 0.2193164                  | 0.1084125          | 0.06963474       |
| 0.08231754         | 0.03269787        | 0.06990291        | 0.06771576                 | 0.13028                    | 0.07804039         |                  |
| 0.2494177          | 0.1079439         | 0.1205519         | 1.0403670                  | 0.3030668                  | 0.1038769          |                  |
| 0.2445358          | 0.1111886         | 0.3725284         | 0.01428429                 | 0.1867325                  | 0.3430196          |                  |
| 0.08324714         | 0.1425429         | 0.1957680.1542414 | 0                          | 0.1117429                  | 0.2047765          |                  |
| 0.07654087         | 0.07950856        | 0.02688363        | 0.01439199                 | 0.05039572                 | 0                  | 0.1320165        |
| 0.1234728          | 0.4677268         | 0.4647362         | 0.2781403                  | 0.4222093                  | 0.7538423          |                  |
| 0.04243998         | 0.06382405        | 0.03146117        | 0.2313622                  | 0.2131924                  | 0                  | 0.07201723       |
| 0.2338267          | 0.02200274        | 0.1354315         | 0.03494257                 | 0.2028260.5187617          |                    |                  |
| 0.9992609          | 0                 | 0.08326011        | 0.02761285                 | 0.07761069                 | 0.1183713          | 0.04694099       |
| 0.05211571         | 0                 | 0.007899588       | 0.3488730.8135604          | 0.1179143                  | 0.08018036         |                  |
| 0.7329554          | 0.1619923         | 0.1763268         | 0.1543924                  | 0.2569186                  | 0.03841485         |                  |
| 0.05593371         | 0.1791775         | 0.02741455        | 0.0661991.8775420.02162876 | 0.5368325                  |                    |                  |
| 1.7006980.09179595 | 0.08588247        | 0.1359339         | 0.04756979                 | 0.01324363                 |                    |                  |
| 0.04093808         | 0.3072415         | 0.003767556       | 0.09749938                 |                            |                    |                  |
| TCGA-FD-A43N       | 699               | 0                 | 0.1569734                  | 0.2637871                  | 0.1626513          | 0.3318808        |



|              |            |             |            |            |             |                     |
|--------------|------------|-------------|------------|------------|-------------|---------------------|
| 0.03441378   | 39.808160  | 0.2200294   | 0.2455469  | 0.1543608  | 0.04431823  |                     |
| 0.5406208    | 0.3907167  | 1.4340420   | 0.1999514  | 0.07553047 | 0.1327142   |                     |
| 0.2734888    | 0.3174948  | 0.1002048   | 0.09200906 | 0          | 3.55989355  | 0.90761             |
| 0.07226893   | 0.06026977 | 0.1032413   | 0.2012553  | 0.1419568  | 0.5191564   |                     |
| 0.1857379    | 0.1121634  | 0.02408964  | 0.9030916  | 0.3180729  | 0.09563407  |                     |
| 0.1619060    | 0.3986180  | 0.1158711   | 0.08343281 | 0.08629815 | 0.1568997   | 0.05792046          |
| 0            | 10.454470  | 0.2489802   | 0.1900299  | 0.06264995 | 1.1292020   | 0.7306602 5.42017   |
| 0.1193183    | 0.9792964  | 0.4262245   | 0          | 0.4659096  | 0.1725045   | 0.07195097          |
| 2.7234680    | 0.03974791 | 0.07553047  | 0.4757230  | 0.04817929 | 0.0355867   | 0.1674541           |
| 0.3025211    | 0.2341939  | 1.0865030   | 0.04474437 | 0.2403502  | 0.08314842  |                     |
| 0.3857825    | 0.7571031  | 3.5102050   | 0.08479555 | 0.04360714 | 0.009360709 |                     |
| 0.1657491    | 0.07389232 | 0.1267876   | 0.2990439  | 0.4688762  | 0.5063428   | 0                   |
| 0.2827485    | 0.08191425 | 0.1425934   | 0.1158409  | 0.2446025  | 0.1667745   | 0                   |
| 0.1235518    | 0.0876470  | 0.09609511  | 0.6098310  | 0.08672272 | 0.0449129   | 0.06277575          |
| 1.6672640    | 0.02108293 | 0.02300892  | 0.0691268  | 0.1625128  | 0.6315089   |                     |
| 0.7412794    | 0.08735805 | 0.04129653  | 0.1652935  | 0.1014301  | 0.827766    |                     |
| 0.1992932    | 0.03298582 | 0.2546131   | 0.4154040  | 0.03714758 | 0.2624862   | 0.0277888           |
| 0.1132957    | 0.4288157  | 0.2404411   | 0.4781894  | 0.7416520  | 0.05308569  |                     |
| 0.3376048    | 1.1994110  | 0.01809808  | 1.1013420  | 1.7290120  | 0.1419568   | 0.254613            |
| 0.3683204    | 0.04416435 | 1.0511840   | 0.3475227  | 0.2435971  | 0.1766574   |                     |
| 0.6381864    | 0.1543608  | 0.4986823   | 1.0072760  | 0.06296699 | 0           | 0.05568884          |
| 0.06838351   | 0.6441026  | 1.1070990   | 0.06398054 | 0.05071504 | 0.3431755   | 0                   |
| 0.4280544    | 0.2396859  | 0.1150030   | 0.1480369  | 0.6644427  | 1.4299510   | 0.5957051           |
| 0.1523882    | 0.5648016  | 1.3937580   | 0.5963825  | 0.1998010  | 0.6022411   | 0.6860803           |
| 0            | 0.1373776  | 0.03901636  | 0.6147575  | 0.07035029 | 0           | 0.05079605          |
| 0.04143105   | 0.1714196  | 0.06809064  | 0.2587860  | 0.4935439  | 0.1695609   |                     |
| 0.5417092    | 0.4328266  | 0.2478391   | 0.7903094  | 0.06988644 | 0           | 0.09709414          |
| 0.3244728    | 0.5658066  | 0.5402629   | 1.0656910  | 0.3951272  | 0.5491741   |                     |
| 0.6934215    | 0.1020366  | 0.08735805  | 0.2676627  | 0.3635480  | 0.06576174  |                     |
| 0.3971656    | 0.03984753 | 0.07835014  | 0          | 2.1878210  | 0.06372411  | 0.2290946           |
| 0.3528589    | 0.3151186  | 0.4493242   | 0.9267273  | 0.1674698  | 0.6987592   |                     |
| 0.1325667    | 0.04984064 | 0.6715321   | 0.3011205  | 0.1664834  | 0           | 0.08201485          |
| 0.5716078    | 0.3894608  | 0.1057594   | 0.07276506 | 0.03016919 | 1.340817    |                     |
| 0.5799456    | 0.08688068 | 0.2253971   | 0          | 0.1616179  | 0.1232493   | 0.4398785           |
| 0.05426336   | 0          | 0.01645025  | 0.4191344  | 2.0525560  | 0.04092449  | 0.1020366           |
| 0.9327510    | 0.2751949  | 0.1134939   | 0.3552162  | 0.5466428  | 0.05999685  |                     |
| 0.0582387    | 0.5845586  | 0.19981     | 0.1608297  | 0.3757912  | 0.1351204   |                     |
| 1.0868573    | 0.2669520  | 0.1066071   | 0.1251903  | 0.1415356  | 0.1981204   | 0.01378939          |
| 0.02131255   | 0.4478638  | 0.003922814 | 0.1717984  |            |             |                     |
| TCGA-UY-A8OD | 3432       | 0           | 0.1016047  | 0.0724361  | 0.1228264   | 0.2976117           |
| 2.8846275    | 2.275240   | 0.1769968   | 0.1846174  | 0.3399463  | 0           | 0.08366749          |
| 4.7539280    | 0.4539238  | 0.9730583   | 0.4301032  | 0.4683036  | 0.2806143   | 0                   |
| 0.5532850    | 0.02017863 | 0.08337697  | 0          | 2.09703497 | 0.320010    | 0.07796288 0.964872 |
| 0.7796288    | 0.3039566  | 11.363091   | 0.02911    | 1.1220830  | 0.1270506   | 0 0.8614374         |

|                           |                            |                    |                           |                    |            |            |
|---------------------------|----------------------------|--------------------|---------------------------|--------------------|------------|------------|
| 0.6766010.1263819         | 1.3693520.1720098          | 0.3625010.03150222 | 0.1111693                 |                    |            |            |
| 0.0921535                 | 0                          | 0.1566889          | 4.1845610.1074388         | 0.1275568          | 0.3469417  |            |
| 0.7503928                 | 0.9710965                  | 8.1789220.1351552  | 0.6525154                 | 0.2844382          | 0          |            |
| 0.7162305                 | 0.08684473                 | 1.08215            | 1.55637                   | 0                  | 0.2851849  | 0.8697466  |
| 0.7276536                 | 0.9405676                  | 0.2619389          | 0.2538326                 | 0.5109057          | 0.8751733  |            |
| 0.007508621               | 0.2994765                  | 0.8431757          | 0.1611582                 | 0.4837697          | 5.821229   |            |
| 0.2241173                 | 0.7508044                  | 1.25117            | 0.1540502                 | 0.1115999          | 0.1148927  |            |
| 0.07527451                | 0.1287537                  | 0.4588389          | 0                         | 0.2299425          | 0.1178242  | 0.3230390  |
| 0.1231414                 | 0.08396003                 | 0.4069927          | 0.03928437                | 0.02647472         | 0.846608   |            |
| 0.2212864                 | 0.8731843                  | 0.4069927          | 1.3091130.9605027         | 0.1552279          | 0          | 0          |
| 5.1134091.2342910.7335029 | 1.0554980.2148311          | 0.3744650.03829756 |                           |                    |            |            |
| 0.6403352                 | 0.1003311                  | 0.2989116          | 0.04272699                | 3.7166650          | 0.9061347  |            |
| 0.4616649                 | 0                          | 0.09963721         | 0.1815695                 | 1.1845790.28003    | 0.2770681  |            |
| 0.08017552                | 0.2222579                  | 1.2216920.0410004  | 1.0440250.05457402        | 0.7392574          |            |            |
| 0.1071997.9899470.2595953 | 0.06670158                 | 1.2171660          | 0.2288193                 | 0.1334032          |            |            |
| 0.04190675                | 0                          | 0.3987327          | 1.0887690.04754964        | 0.07399867         | 0          | 0.1032799  |
| 0.4607956                 | 2.6009750                  | 0.03829756         | 0.2885984                 | 0.1247406          | 0.09235603 | 0          |
| 0.6079131                 | 0.04471614                 | 0.5017552          | 1.3319310.09307197        | 0.2685111          |            |            |
| 0.3838599                 | 1.2474060.3018893          | 6.6387250.2273917  | 0.4955690.05973276        |                    |            |            |
| 0.2351461                 | 0.2651695                  | 0.6151117          | 0.1062503                 | 0                  | 0.2557249  | 0.03128673 |
| 0.2588956                 | 0.1028376                  | 0.4885568          | 0.3194577                 | 0.2134071          | 0.4090727  |            |
| 0.08715996                | 0.03917222                 | 0.6951007          | 0.2638744                 | 0.4311054          | 0.1466416  |            |
| 0.0816754                 | 0.2563619                  | 0.4079805          | 0.9349398                 | 0.06738794         | 0.2083931  |            |
| 0.3480082                 | 2.1880610.02801933         | 0.1319372          | 0.2627638                 | 0.2562317          |            |            |
| 0.06876014                | 0.3030774                  | 0.1805456          | 0.1428921                 | 0                  | 0.2942162  | 0.4754964  |
| 0                         | 0.2076015                  | 1.3798190.08653178 | 0.3654086                 | 1.5745950.09484885 |            |            |
| 1.3011020.08008639        | 0.1003665.0428160.04547835 | 0.1676270          | 0.8352198                 |                    |            |            |
| 0.2717801                 | 0.5882041                  | 0.1597288          | 0.1098973                 | 0.09112929         | 0.8541641  |            |
| 0.9674053                 | 0.5248649                  | 0.07855802         | 0.08684473                | 0.09153457         | 0.09307197 |            |
| 0.1181067                 | 0.05463611                 | 0                  | 0                         | 0.01055034         | 0.6888852  | 0          |
| 0.4482346                 | 0.2145176                  | 0.1512444          | 0.4894930.7904649         | 0.06040898         |            |            |
| 0.05863875                | 0.3318556                  | 0.7328791          | 0                         | 0.5434074          | 0.1360485  | 2.344977   |
| 16.318250.04441631        | 0.2971184                  | 0.2137617          | 0.2244165                 | 0.1249570          |            |            |
| 0.1932601                 | 0.04739712                 | 0.2358798          |                           |                    |            |            |
| TCGA-2F-A9KT              | 2352                       | 0                  | 0.1007134                 | 0.2154021          | 0.2191482  | 0.7638977  |
| 54.208560                 | 0.07319918                 | 0.5513961          | 0.1386520.01990406        | 0.3732325          |            |            |
| 1.0258682.2028460.2503557 | 0.04641957                 | 0.04768334         | 0.08503503                | 0.3948708          |            |            |
| 0.02400195                | 0                          | 0.9106827          | 3.68692939.991970.1298287 | 0.6496358          |            |            |
| 0.1854696                 | 0.1446193                  | 0.1275104          | 2.2150370.3336720.2518723 | 0.04327624         |            |            |
| 0.8965751                 | 0.2736317                  | 0.2147543          | 1.1052630.6240335         | 0.1115135          |            |            |
| 0.2810330.09803478        | 0.2505467                  | 0.3641826          | 0                         | 10.070610.5750803  |            |            |
| 0.2655196                 | 0.02501079                 | 3.6514330.2100171  | 2.19513                   | 0.6430541          | 1.604043   |            |
| 0.1958763                 | 0                          | 2.2718330.1549493  | 0.01974768                | 1.1900970.2856232  |            |            |
| 0.1356880.5847404         | 0                          | 0.02615331         | 0.4566104                 | 0.4226982          | 0.6077089  |            |

|              |            |             |            |            |            |            |
|--------------|------------|-------------|------------|------------|------------|------------|
| 0.6506223    | 0.07145046 | 0.3886030   | 0.1387038  | 0.5455891  | 0.188323   | 2.225635   |
| 0.03808309   | 0.01566776 | 0.008408101 | 0.3206676  | 0          | 0.2733236  | 0.1790741  |
| 0.4594475    | 0.4366215  | 0.3697388   | 0.7033130  | 0.1121190  | 0.3842465  | 0.1040522  |
| 0.2197102    | 0          | 0.1210268   | 0.1518651  | 0.03149098 | 0.1931831  | 4.168747   |
| 0.2596575    | 0          | 0.3296486   | 1.8835690  | 0.08995261 | 0.04133476 | 0          |
| 0.0          | 1.06775    | 3.2603290   | 0.4708075  | 0.07418785 | 0.5010933  | 0.5922012  |
| 0.7435271    | 0.1193412  | 0.1185159   | 0.3557584  | 2.1382010  | 0.5338751  | 0.6062757  |
| 0.01426333   | 0.33922    | 0.4148055   | 0.6479165  | 0.2318075  | 0.9992649  | 0          |
| 0.3337834    | 0.7153539  | 1.8039360   | 0.1950756  | 0.2525776  | 0.06491436 |            |
| 0.9552404    | 0.04250345 | 0.1524679   | 0.8270942  | 0          | 0.7711041  | 0.560783   |
| 0.1761130    | 0.7975517  | 0.6932602   | 0.8958661  | 1.3128020  | 0.1696772  | 0          |
| 0.1228487    | 0.5481042  | 2.2650970   | 0.4597557  | 0.1366618  | 0.5604576  |            |
| 0.1483757    | 0.4394203  | 0.1435292   | 0.1549493  | 0.05318868 | 1.0231282  | 0.18403    |
| 0            | 0.5018938  | 1.3697741   | 0.0200830  | 0.6593116  | 0.2422817  | 0.2704765  |
| 1.4468720    | 0.3619649  | 0.1051374   | 0.9525375  | 0.1263819  | 0.1025577  |            |
| 0.1216712    | 0.09303687 | 0.2822871   | 0.1834839  | 0.1888658  | 0.5699798  |            |
| 0.5076843    | 0.2919488  | 0.5702097   | 0.1553144  | 1.0105380  | 0.4394203  |            |
| 0.05127885   | 0.1308198  | 0.1943015   | 0.4065811  | 0.2773041  | 0.8868537  | 0          |
| 0.8525505    | 0.5312316  | 0.3559168   | 0.3332826  | 0.3661836  | 0.1923389  |            |
| 0.3918611    | 0.1635768  | 0.7360261   | 0.2863391  | 0.1619992  | 0.05028578 |            |
| 1.48061      | 0          | 0.1144782   | 0.4115608  | 0.2555253  | 0.3602455  | 1.614392   |
| 1.5607830    | 0.09401685 | 1.0489470   | 0.2381516  | 0          | 0.3909192  | 0.1622859  |
| 0.2492349    | 0.0751640  | 0.05051553  | 0.4563886  | 0.2469365  | 0.1266622  | 0          |
| 0.1625939    | 1.1073321  | 0.7602650   | 0.3901956  | 0.4672135  | 0          | 0.2540486  |
| 0.2214133    | 0.2546287  | 0.3899293   | 0          | 0          | 0.8282571  | 2.1070560  |
| 0.1833054    | 0          | 0.06379078  | 0.1139375  | 0.3819488  | 0.6686132  | 0          |
| 0.7149890    | 0.04127503 | 0.3375482   | 0          | 2.4545743  | 0.2321860  | 0.3566163  |
| 0.3212859    | 0          | 0.08897919  | 0.03715827 | 0.03828729 | 1.2068590  | 0.07751925 |
| 0.1402864    |            |             |            |            |            |            |
| TCGA-BT-A20Q | 593        | 1           | 0.03050143 | 0.09785302 | 0.1106165  | 0.1974933  |
| 0.3276593    | 56.652490  | 0.1884335   | 0.05566414 | 0.5248912  | 0.04521014 |            |
| 1.5679030    | 0.3679199  | 0.1696119   | 0.04120716 | 0.2243928  | 0.0361027  | 0          |
| 0.9301297    | 0.05451811 | 0.1001181   | 0.2507306  | 1.0407822  | 0.1571910  | 0.02106381 |
| 0.1311631    | 0.07021272 | 0.05474814  | 1.15851    | 0.6178719  | 0.05052691 |            |
| 0.1525610    | 0.1638297  | 0.6788279   | 0.3168574  | 0.1138185  | 0.2642629  |            |
| 0.1781472    | 0.1125743  | 0.04255595  | 0.1104752  | 0.2015536  | 0.1181722  |            |
| 0.03527817   | 1.2927110  | 0.2418962   | 0.1723149  | 0.02840479 | 0.1843084  |            |
| 0.2385167    | 4.1388550  | 0.0811464   | 0.9794165  | 0.5797364  | 0.1625979  |            |
| 0.2150104    | 0          | 0.1427203   | 0.2502953  | 0          | 0.1541011  | 0.1702797  |
| 0.06553187   | 0.2288182  | 0.06507584  | 0          | 0.3893301  | 0.2955651  | 0.0067622  |
| 0.1798040    | 0.2908176  | 0.1116444   | 1.0693940  | 0.5148933  | 0.3171742  | 0.09490079 |
| 0.05729457   | 0.2254464  | 0.2512647   | 0.03449046 | 0.5875271  | 0          | 0.1928390  |
| 0.1183339    | 0.1008059  | 0.09697541  | 0          | 0.2772502  | 0.07561369 | 0.09163354 |
| 0.09729271   | 0.04768581 | 0.1338174   | 0.1777440  | 0.5111486  | 0.06108903 |            |

|              |             |            |             |            |             |            |
|--------------|-------------|------------|-------------|------------|-------------|------------|
| 0.7192085    | 0.9117785   | 0.5018353  | 0           | 0.04701199 | 2.3209671   | 3.137      |
| 0.3824448    | 0.3564646   | 0.2371630  | 0.2107750   | 0.1379618  | 0.3569927   | 0.2409528  |
| 0.1794649    | 0.07695913  | 1.3126260  | 0.1010538   | 0.2040143  | 0.00539963  |            |
| 0.1027340    | 0.04486622  | 0.12264    | 0.9773467   | 0.3152408  | 0           | 0.2527189  |
| 0.1255928    | 1.4669940   | 0.06154103 | 0.6055782   | 0.1474467  | 0.7950910   | 0.1609041  |
| 2.8474880    | 0.0417481   | 0.06007088 | 0.8102122   | 0.1181722  | 0.1575850   | 0.04004725 |
| 0.1509635    | 0.2624456   | 0.3590953  | 0.5104159   | 0          | 0.1666064   | 0.07574612 |
| 0            | 0.3688787   | 0.2091443  | 0.2175605   | 0          | 0.3288649   | 1.4042540  |
| 0.1086709    | 0.07821163  | 0.08054196 | 0.3227689   | 0.5865188  | 0           | 0.1036367  |
| 0.1920561    | 0.5617017   | 0.4412461  | 0.4891729   | 0.4095742  | 0.5680248   |            |
| 0.05379482   | 0.2491419   | 0.07960313 | 0.2613040   | 0.1594802  | 0.03882498  |            |
| 0.06909111   | 0.3944720   | 0.5828980  | 0.04630732  | 0.1319970  | 0.4315513   | 0.3228836  |
| 0.2578852    | 0.1177433   | 0.06663654 | 0.3224858   | 0.3327003  | 0           | 0.09904817 |
| 0.2206685    | 0.1923978   | 0.6298694  | 0.3890248   | 0.02022967 | 0.2303309   |            |
| 0.5902617    | 0.6736921   | 0.1261699  | 0.07921435  | 0.4004725  | 0.1977944   |            |
| 0.05504427   | 0.1649066   | 0.2167972  | 0.1286874   | 0          | 0.1426754   | 0          |
| 0.08667542   | 0.2492855   | 0.5766804  | 0.5455085   | 0.3760959  | 0.4726889   |            |
| 0.8399641    | 0.6249397   | 0.06010427 | 0.06779159  | 0.9102131  | 0           | 0          |
| 0.4398410    | 0.2951552   | 0.1246427  | 0.04795015  | 0.1484589  | 0.1641405   |            |
| 0.6482469    | 0.3861699   | 0.1772583  | 0.1650803   | 0.1173174  | 0.08243526  |            |
| 0.1676397    | 0.09307016  | 0.04920482 | 0.08513983  | 0.03356262 | 0           | 1.63964    |
| 0.1113283    | 0.07570192  | 0.05766804 | 0.1448946   | 0.07264503 | 0.4619933   |            |
| 0.2214757    | 0           | 0.02640478 | 0.2086425   | 0.2717749  | 0.1875045   | 1.957552   |
| 0.03063104   | 1.90068     | 7.3158390  | 0.1600038   | 0.2675823  | 0.06417067  | 0.2021076  |
| 0.04688967   | 0           | 0.3045847  | 0.005335681 | 0.1805667  |             |            |
| TCGA-CU-AOYR | 460         | 1          | 0.01702611  | 0.3641481  | 0.06174686  | 0.1102421  |
| 28.9544      | 0           | 0.08662284 | 0           | 0.4687965  | 0.01682441  | 0.2374612  |
| 0.6311901    | 0.009200847 | 0.01207302 | 0           | 0.1118102  | 0.4450327   | 0.04057651 |
| 0.05588662   | 0           | 0.9965008  | 23.225440   | 0.2586752  | 0.1098242   | 0.1567729  |
| 0.1833647    | 0           | 0.8868865  | 0           | 0.2554817  | 0.2560624   | 0.2887058  |
| 0.1564637    | 0.01815265  | 0.1966845  | 0.1470026   | 0.04398781 | 0.1187751   |            |
| 0.08093925   | 0.05294522  | 0.04397636 | 0.03938503  | 1.5899660  | 0           | 0.0317115  |
| 0.2743525    | 0.6213278   | 2.7651850  | 0.2264824   | 1.0496970  | 0.4816563   | 0.09076324 |
| 0.1642382    | 0.08731653  | 0.04704171 | 0.4470930   | 0.05734684 | 0.07604101  | 0          |
| 0.01228152   | 0.09535517  | 0          | 0.4346534   | 1.5948690  | 0.007549413 | 0.09124347 |
| 0.02705606   | 0.1246413   | 1.9013740  | 0.2612881   | 0.06438139 | 0           | 0          |
| 0.03740205   | 0           | 0.05045564 | 0.3883596   | 0.1845327  | 0           | 0.1981643  |
| 0.2073125    | 0           | 0.04397636 | 0.1238104   | 0          | 0.1023009   | 0.03949779 |
| 0.05323709   | 0.07296064  | 0.1082377  | 0           | 0          | 0.1393219   | 0.8352180  |
| 0.1048177    | 0           | 0.08225902 | 0.2256357   | 0.2717060  | 0.04421799  | 0.01393537 |
| 0.1098123    | 0.07701123  | 0.2605913  | 0.2017523   | 0          | 0.04295911  | 0.7937766  |
| 0            | 0.1708233   | 0.00602822 | 0.3440811   | 0.2003570  | 0.4034082   | 0.7742660  |
| 0            | 0.1796486   | 2.5837270  | 0.05496419  | 0.4625782  | 0           | 0.3636158  |
| 0.08591823   | 0.5033680   | 0.1341279  | 0.2261330   | 0.4617518  | 0.04059925  | 0          |

|              |            |            |            |            |            |                  |
|--------------|------------|------------|------------|------------|------------|------------------|
| 0.08426884   | 0.2343983  | 0.4899875  | 0.2849176  | 0          | 0.07440068 | 0.126846         |
| 0.05192048   | 0.1029553  | 0.0466983  | 0.09715502 | 0.1155169  | 0.5507238  |                  |
| 0.06270915   | 0.6964333  | 0.06066086 | 0          | 0          | 0.1441374  | 2.3277 0.1247701 |
| 0.1157014    | 0.1715312  | 0.3135457  | 0.5025650  | 0.1213598  | 0.1371763  |                  |
| 0.9965225    | 0.1201145  | 0.08344362 | 0.2073634  | 0.4900952  | 0.03560918 |                  |
| 0.04334474   | 0.02571142 | 0.01572835 | 0.6941390  | 0.1033962  | 0.07368165 |                  |
| 0.1605966    | 0.1459052  | 0.5346836  | 0.1752669  | 0.05688948 | 0.3176713  |                  |
| 0.4775543    | 0          | 0.03685958 | 0.4105956  | 0.08591823 | 0.4101970  | 0.2379795 0      |
| 0.2666685    | 1.8428010  | 0.2820446  | 0.1690293  | 0.08843598 | 0.1016120  | 0.662461         |
| 0.08449674   | 0.2285429  | 0.2420353  | 0.05836528 | 0          | 0.1592848  | 0.1593599        |
| 0.04838281   | 0          | 0.4049797  | 0.4785103  | 0.2099393  | 0.3957872  | 0.09536414       |
| 0.2907047    | 0.06710123 | 0.2018225  | 1.1831680  | 0.04213442 | 0.1270685  |                  |
| 0.06049099   | 0.1768131  | 0.06957643 | 0          | 0.05524719 | 0.04581219 | 1.109691         |
| 1.5694020    | 0.0789848  | 0          | 0.1227091  | 0          | 0.08906125 | 0.4394634        |
| 0.09505127   | 0.1498791  | 0.4243062  | 3.9578720  | 0.0932163  | 0          | 0.5794325        |
| 0.3504850    | 0.07603303 | 0.1063049  | 0.08830659 | 0          | 0.05895732 | 0.3714311        |
| 0.6935159    | 0.03488876 | 0.4492290  | 0.06839383 | 0.1414632  | 0.18567    | 0.05023981       |
| 0.2987326    | 0          | 0.2256357  | 0.06281792 | 0.0323633  | 0.1133475  | 0.01191365       |
| 0.2490194    |            |            |            |            |            |                  |
| TCGA-SY-A9G5 | 1186       | 0          | 0.05419774 | 0.1159161  | 0.1965534  | 0.1503961        |
| 0.02772453   | 18.559240  | 0.06294218 | 0.1969564  | 0.8242428  | 0          | 0.1428151        |
| 1.2526170    | 0.2905573  | 0.6027639  | 0.1952551  | 0.3074480  | 0.04276705 | 0.01694837       |
| 0.1574038    | 0.03229092 | 0.1185994  | 0.07425352 | 1.83710919 | 0.571150   | 0.06653887       |
| 0.4467033    | 0.1663472  | 0.1945631  | 0.2580011  | 1.1501720  | 0.5386850  | 0.03881434       |
| 0.4595061    | 0.2309831  | 0.0385225  | 0.4173925  | 0.1651556  | 0.1333548  |                  |
| 0.07561731   | 0.06952377 | 0.02808933 | 0.0933241  | 0.04179032 | 6.021532   |                  |
| 0.1146195    | 0.1360822  | 0.03364816 | 0.7277689  | 0.09418186 | 2.068396   |                  |
| 0.04806279   | 0.5569014  | 0.1437389  | 0          | 0.6568581  | 0          | 0.07084654       |
| 0.4743975    | 0          | 0.06084909 | 0.6454794  | 0          | 0.05994523 | 0.2264474        |
| 0.2707977    | 0.2515627  | 0.2334165  | 0.02403139 | 0.1258606  | 0.1339726  |                  |
| 0.2512813    | 0.1876737  | 0.8871850  | 0.2049397  | 0.1264713  | 0.07541203 |                  |
| 0.04108655   | 0.1190587  | 0.0408572  | 0.5353702  | 0.2060386  | 0.3263371  | 0                |
| 0            | 0.1696937  | 0.2297531  | 0          | 0.1970574  | 0          | 0                |
| 0.02949197   | 0.4083481  | 0.3726177  | 0.07236572 | 0.4162595  | 0.7754476  |                  |
| 0.1401254    | 0.1112191  | 0.05569014 | 0.4364134  | 1.07737    | 0.6177845  |                  |
| 0.1407553    | 0.05175246 | 0.2829740  | 0.1225716  | 0.3253011  | 0.07135784 |                  |
| 0.05314827   | 0          | 3.0839440  | 0.6646041  | 0.01279274 | 0.06084909 | 0.3720379        |
| 0.1452786    | 0.8357066  | 0.2240595  | 0.09852871 | 0          | 0.1766722  | 1.54304          |
| 0.07290115   | 0.3964383  | 0.1164431  | 0.66244    | 0.3049698  | 1.5498110  | 0.05934548       |
| 0.07115963   | 1.63726    | 0.06999308 | 0.1196630  | 0.2682457  | 0          | 0.3308529        |
| 0.5250785    | 0          | 0.1184166  | 0.1345926  | 0          | 0.2184858  | 0.2973013 0      |
| 0.0408572    | 0.3141705  | 0.1330777  | 0.1970574  | 0.06436549 | 0.2316227  |                  |
| 0.09540955   | 1.3764610  | 0.7889193  | 0          | 0.1636899  | 0.1820069  | 1.247604         |
| 0.1583932    | 0.9094482  | 0.1940717  | 0.1922511  | 0          | 0.1918359  | 0.09429742       |

|              |             |            |            |            |             |                        |
|--------------|-------------|------------|------------|------------|-------------|------------------------|
| 0.4457365    | 0.1511355   | 0.09198372 | 0.1818776  | 0.03337781 | 0.6904977   | 0                      |
| 0.5081796    | 0.2840074   | 0.4189134  | 0.2618480  | 0.1859707  | 0.09751074  |                        |
| 0.8314441    | 1.6327620   | 0.04599186 | 0.1173319  | 0.6970739  | 0.09116536  |                        |
| 0.4352482    | 0.5050264   | 0.02396395 | 0.3132708  | 0.2598873  | 2.593669    |                        |
| 0.07473006   | 0.1407553   | 0.7762868  | 0.07810203 | 0.08965705 | 0.3098615   | 0                      |
| 0.1714977    | 0           | 0.6277607  | 0.08454609 | 0.05133761 | 0           | 0.6677068              |
| 0.1384728    | 0.3898310   | 0.6066067  | 0.1686469  | 0.8945292  | 0.1139187   |                        |
| 0.1070740    | 0.3091438   | 0.1455538  | 0.1341229  | 0          | 0.4002139   | 0.2217224 0            |
| 0.05680148   | 0.0586212   | 0.14583    | 0.4095518  | 0.7112863  | 0.1399862   |                        |
| 0.0838085    | 0           | 0.1953047  | 0.0992925  | 0.04725017 | 0.05828775  | 0 0 0                  |
| 0.8399169    | 0.09890913  | 0.05978405 | 0.6831324  | 0.2002482  | 0.112947    |                        |
| 0.1336854    | 0.4310181   | 0.09666968 | 0          | 0.5277131  | 0           | 0.07403892             |
| 0.6054920    | 0.1088561   | 1.1507855  | 0.3401510  | 0.07107736 | 0.8644814   | 0 0.2394156            |
| 0.08887239   | 0           | 0.3092652  | 0          | 0.3019741  |             |                        |
| TCGA-4Z-AA84 | 460         | 0          | 0.0497527  | 0.05320462 | 0.1804331   | 0.2147620 0.0254507    |
| 41.203580    | 1.4584780   | 0.1210628  | 0.2283150  | 0.06555106 | 0.2610368   | 0.04445453             |
| 0.7685112    | 0.01792412  | 0.1205368  | 0          | 0          | 0.07224714  | 0.009880859            |
| 0.4627078    | 0.3408184   | 0.42971144 | 0.973340   | 0.03817605 | 0.1604610   | 0.1527042              |
| 0.0595353    | 0           | 2.2076660  | 0.1098899  | 0.04147521 | 0           | 0.4218196 0.4041992    |
| 0.1414523    | 0.28737     | 0.1010735  | 0.02448354 | 0.07712838 | 0.1332749   |                        |
| 0.03867836   | 0.4711856   | 0          | 1.9060950  | 0.4208760  | 0.03123034  | 0.01029617             |
| 0.6680808    | 0.3458301   | 9.0648020  | 0.2556135  | 0.01466112 | 0           | 0.7629616              |
| 0            | 0.02660566  | 4.5182060  | 0          | 2.8145670  | 0.009570228 | 0.2299897              |
| 0.09943528   | 0.1539538   | 0.3214093  | 0.3970882  | 0.1955260  | 0.0351385   |                        |
| 0.07284392   | 0.9906194   | 1.6288450  | 0.1567763  | 0.01289986 | 0.01384542  |                        |
| 0.03771683   | 0.01821568  | 0.6751132  | 0.1720116  | 0.06304677 | 0.2097008   | 0                      |
| 0.09651071   | 0.08654236  | 0.1054549  | 0.1285052  | 0.5426872  | 0           | 0                      |
| 0.1635090    | 0.003384148 | 0.1288572  | 0.08551434 | 0          | 0.2892683   | 2.211817               |
| 0.09744921   | 0.03403248  | 0          | 0          | 0.3846147  | 1.36108     | 0.08614082 0.2103924   |
| 0.9015401    | 0.1500252   | 0.3882080  | 0.06550541 | 0.0487893  | 0.1673768   |                        |
| 2.2362630    | 0.05546331  | 0          | 0.05585854 | 0.6830502  | 0.1778181   | 0.2731859              |
| 0.4799274    | 0           | 0.03925951 | 0.08109119 | 1.1276890  | 0.02676886  | 0.4159135              |
| 0.2672323    | 1.6979760   | 0.03499471 | 0.1255326  | 0.2269927  | 0.06532346  |                        |
| 2.2026420    | 0.1406065   | 0.04354897 | 0.3693682  | 0.05707875 | 0.1301648   |                        |
| 2.5999550    | 0.04656722  | 0          | 0          | 0          | 0.1002833   | 0.8187543 0 0.03750629 |
| 0.4441418    | 0.1221633   | 1.5376140  | 0.05908654 | 0.4252522  | 0           | 0.9827768              |
| 0.1604797    | 0.0303830   | 0.3005296  | 0.5430085  | 0.07635209 | 0.1696363   |                        |
| 0.1034339    | 0.1781549   | 0.7059345  | 0.05849862 | 0.05418535 | 0.05770906  |                        |
| 0.9092873    | 0.1387401   | 0.2955388  | 0.3255738  | 0.04596048 | 0.1479022   |                        |
| 0.05035641   | 0.04784627  | 0.2085716  | 0.7858321  | 0.1602483  | 0.1280387   |                        |
| 0.2173896    | 0.7426245   | 0          | 0          | 0          | 0.2399637   | 0.1673768 0.05707875   |
| 0.5968935    | 0           | 0.6895683  | 0.8974875  | 0.07325995 | 0.05488085  | 0.3445633              |
| 0.9897493    | 0.1792412   | 0.1720898  | 0.2411626  | 0          | 0.1311936   | 0                      |
| 0.1773153    | 0.07761203  | 0          | 0.2033122  | 0.1416044  | 0.2966038   | 0.7668406              |

|                   |              |                    |             |                   |                         |
|-------------------|--------------|--------------------|-------------|-------------------|-------------------------|
| 1.4135570.1393338 | 0.3256341    | 0.1176476          | 0.07371926  | 0.1384338         |                         |
| 0.04453872        | 0.04104091   | 0                  | 0.05892108  | 0.1252540.1016561 | 0.05214289              |
| 0.05381337        | 0            | 0.4699529          | 0.8526759   | 0                 | 0.1025799 0 0.1195245 0 |
| 0.0650624         | 0.1872754    | 0                  | 0.06082888  | 0.3513001         | 0.2891366 0.09079708    |
| 0.06860106        | 0.3762631    | 0.1838248          | 0.05431049  | 0.1649066         | 0.08601479              |
| 0.02958043        | 0            | 0.20849            | 0.04221983  | 0.2038998         | 1.9158480.1332376       |
| 1.0104722.29702   | 0.07612259   | 0.3438850.06978173 | 0.2197799   | 0.01019794        | 0                       |
| 0.3154453         | 0            | 0.3234089          |             |                   |                         |
| TCGA-4Z-AA7Q      | 510 1        | 0.17163798         | 0.163152442 | 0.138324897       | 0.105841555             |
| 0.234134349       | 18.325736182 | 0.132887063        | 0.304938688 | 0.556860073       | 0.131274356             |
| 0.01884496        | 0.577555519  | 0.869041198        | 0.67164422  | 0.123670049       | 0.101422118             |
| 0.090292211       | 1.574423765  | 0.290779756        | 0.034087207 | 0.312992098       | 0.235152324             |
| 3.141672525       | 11.804568956 | 0.1843808          | 0.266529738 | 0.175600762       | 0.136924138             |
| 0.482902094       | 1.79363635   | 0.063183452        | 0.047694034 | 0.040973511       | 0.282956085             |
| 0.297170519       | 0.142329038  | 0.936298969        | 0.164657161 | 0.161889094       | 0.124170299             |
| 0.064756986       | 0.118607532  | 0.246288864        | 0.573495472 | 2.054902528       | 0.241991206             |
| 0.179565188       | 0.011839981  | 1.152379997        | 0.347973568 | 2.482671293       | 0.15220929              |
| 0.58788081        | 0.101156548  | 2.744917167        | 0.693397879 | 0.635719213       | 0.052691266             |
| 0.688582616       | 0.067606293  | 0.064234008        | 0.766559545 | 0.122920533       | 0.112803257             |
| 0.259388449       | 0.114344682  | 0.088518878        | 0.246401069 | 0.016912143       | 0.091981351             |
| 0.111119795       | 0.153571342  | 0.792454719        | 0.643869459 | 0.144226759       | 0.044502223             |
| 0.031842823       | 0.130116362  | 0.251363445        | 0.129390035 | 0.197803157       | 0.217500139             |
| 0.068898133       | 0.525097423  | 0.110981603        | 0.119422304 | 0.242533787       | 0.197031091             |
| 0.277359152       | 0            | 0.057293469        | 0.121663677 | 0.149076721       | 0.023349418 0.484946761 |
| 0.098336426       | 0.152782583  | 0.525655613        | 0.935524922 | 0.017929731       | 0.039135336 0           |
| 0.414621219       | 2.085053902  | 0.391290443        | 1.040096818 | 0.039022391       | 0.298715266 0           |
| 1.219059509       | 0.075327346  | 0                  | 0.096236716 | 3.446997649       | 0.063183452 0.765354262 |
| 0.006752189       | 0.064234008  | 0.22441923         | 0.408960564 | 0.352878169       | 0.394205791 0           |
| 0.045146106       | 0.211039608  | 1.154446644        | 0.369391243 | 0.757270196       | 0.061460267             |
| 1.695023785       | 0.201209206  | 0.818012088        | 0.271469285 | 0.150236207       | 0.864168596             |
| 0.591093274       | 0.242533787  | 0.100157471        | 0.14158386  | 0.065637178       | 2.394909279             |
| 0.772643351       | 0.053549539  | 0.041667977        | 0.09471985  | 0.116311902       | 0.461279612             |
| 0.889212367       | 0.217646014  | 0                  | 0.577066226 | 0                 | 0.208019364 0.067946023 |
| 0.146704434       | 0.10071701   | 0.726515389        | 0.525235244 | 0                 | 0.302392366 0.672460465 |
| 0.790203427       | 0.334408705  | 0.178414346        | 0.153650666 | 0.558100732       | 0                       |
| 0                 | 0.967204581  | 0.119657156        | 0.194201201 | 0.047998788       | 0.03523455 0.413048332  |
| 0.057906889       | 0.275101905  | 0.239844943        | 0.490283818 | 0.32248317        | 1.177895489             |
| 0.171558475       | 0.624666335  | 1.664154909        | 0.145650901 | 0.289004001       | 0.643869459             |
| 0.288710149       | 0            | 0.559776109        | 0.025297023 | 0.469377026       | 0.339664468 0.126366903 |
| 0.094664588       | 1.139153658  | 1.434072886        | 0.123670049 | 0.146268786       | 0.526202019             |
| 0.067775733       | 0.213725148  | 0                  | 0.280365401 | 0                 | 0.216773686 0.077932326 |
| 0.188425282       | 0.243626282  | 0.881821215        | 0.689608819 | 0.320451159       | 1.302469224             |
| 0.060127887       | 0.113030375  | 0.58502576         | 0.307301333 | 0.2359731         | 0.071164519             |
| 0.127540244       | 0.648156206  | 0.11689849         | 0.059961236 | 0.123764381       | 0.153942224             |

|              |             |             |             |             |             |             |            |            |            |
|--------------|-------------|-------------|-------------|-------------|-------------|-------------|------------|------------|------------|
| 0.421526049  | 1.869773352 | 0           | 0.088470613 | 0           | 0.171807607 | 0.104815958 |            |            |            |
| 0.166262018  | 0.092295281 | 0.212933207 | 0.041969763 | 0.118815981 | 1.108299888 |             |            |            |            |
| 0.034803755  | 0.094664588 | 0.360566897 | 0.271784093 | 0.085164342 | 0.220503239 |             |            |            |            |
| 0.197823828  | 0.170078725 | 0.066037893 | 0.662841362 | 0           | 0.078157564 | 1.427942828 |            |            |            |
| 0            | 0.369721916 | 3.060201478 | 0.068778657 | 0.608380591 | 0.160489717 | 0.168489204 |            |            |            |
| 0.105543216  | 0           | 0.108823007 | 0           | 0.199232691 |             |             |            |            |            |
| TCGA-FD-A5BT | 328         | 1           | 0           | 0           | 0           | 0.1618355   | 0.02684998 | 142.58480  | 3047835    |
| 0.1271624    | 0.1915782   | 0           | 0           | 2.3808920   | 0.04689864  | 0.3567362   | 0          |            |            |
| 0.2636326    | 0.1242540   | 0.1143289   | 0.03127233  | 0.3158602   | 0           | 1.581474    |            |            |            |
| 39.977880    | 0.03221997  | 0.2821385   | 1.5304490   | 0           | 1.6708361   | 1.9708390   | 0          | 0          |            |
| 0.06291474   | 0.01865367  | 1.5663760   | 0.06220117  | 1.2591960   | 0.06509513  | 0.03366535  |            |            |            |
| 0.02720327   | 0.09038026  | 0.4451928   | 0           | 0           | 0           | 0.3801788   | 0          | 0.09121096 |            |
| 5.1265790    | 0.09309336  | 0.1348336   | 0.8197613   | 0           | 0.2336833   | 0           | 0.1543764  |            |            |
| 0.6891495    | 0.2480938   | 0           | 0.3516290   | 0.8645693   | 0.0555302   | 0.07465678  |            |            |            |
| 0.1049022    | 0.04060455  | 1.8084290   | 0.05430446  | 0.1593951   | 0           | 0.1921222   |            |            |            |
| 0.04543843   | 0.1610999   | 0           | 0.2177455   | 0.05112324  | 0.07958101  | 0.1345203   |            |            |            |
| 0.03956839   | 0.1036965   | 0.1330262   | 0.8849206   | 0           | 0           | 0.2434679   | 0          | 0          |            |
| 0            | 0.4337304   | 0           | 0           | 0.05470646  | 0.1106765   | 0.04325421  | 0.2255398  |            |            |
| 0.3504150    | 0.1469348   | 0.4291352   | 0.0205614   | 0.2872287   | 0           | 0.0422647   |            |            |            |
| 1.6230440    | 0.5982970   | 0.2726306   | 0           | 0.2095659   | 0           | 0.3780477   | 0          | 0.1029435  |            |
| 0            | 2.3090170   | 0.4095888   | 0.006194602 | 0           | 0.1544152   | 0.09379728  |            |            |            |
| 1.0422780    | 0.09542069  | 0.08283599  | 0.00450261  | 0.5368112   | 0           | 0.3839329   |            |            |            |
| 0.3383097    | 0.3956313   | 0.07383744  | 0.1324344   | 0.009578911 | 0           | 0.5877704   |            |            |            |
| 0            | 0.05562641  | 0           | 0           | 0           | 0.4119639   | 0.6009726   | 0          | 0          | 0.086898   |
| 0.05335351   | 0.1586954   | 0.4798720   | 0.04991827  | 0.1187052   | 0.01825561  | 0           |            |            |            |
| 0.9064966    | 0.1246703   | 0.1345898   | 0.09239993  | 0.3702893   | 0.1779851   |             |            |            |            |
| 0.09616039   | 0           | 0           | 0.3221997   | 0.04090582  | 1.2315060   | 0.04698746  | 0.4189201  |            |            |
| 0            | 0.04287335  | 0           | 0.47964     | 0           | 0           | 0.2025615   | 0          | 0.2229055  | 0          |
| 0.01261922   | 0.1650291   | 0.5732704   | 0           | 0.0900522   | 0.03597518  | 0.7399289   |            |            |            |
| 0.1090522    | 0.2227054   | 0           | 2.7003410   | 0.1324344   | 0.1806508   | 0.7703258   | 0          |            |            |
| 0.09460513   | 0.1737855   | 1.1786390   | 0.04342365  | 0           | 1.1694660   | 0.03781918  | 0          |            |            |
| 0.06523634   | 0           | 0.03690842  | 0           | 0.1169151   | 0.2456374   | 0           | 0.1429935  |            |            |
| 1.0478630    | 0.2682095   | 0.4314675   | 0.09038026  | 0.06533082  | 0.8961847   |             |            |            |            |
| 0.01379065   | 0.07777235  | 0.2665320   | 0.7987869   | 0           | 0           | 0.1791687   | 0.1156229  |            |            |
| 0            | 0.2200388   | 0.2270881   | 0.09415325  | 0.4858752   | 0.1512767   | 0.3389260   |            |            |            |
| 0            | 0           | 0.1923208   | 0.05338631  | 0.08467365  | 0           | 0           | 0.08720345 | 0.1525167  |            |
| 0            | 0           | 0.8600585   | 0.1108180   | 0.03125263  | 0.07282597  | 0           | 0          | 0          | 0.08409959 |
| 0.4454108    | 0.03585171  | 1.1790230   | 0.07028153  | 3.3919074   | 3.146750    | 0.005736273 |            |            |            |
| 0.7534907    | 0           | 0           | 0.1613793   | 0           | 0.2329519   | 0.1224248   | 0.03655606 |            |            |
| TCGA-CF-A27C | 425         | 0           | 0.4839541   | 0.6437588   | 0.04280749  | 1.1791750   | 0.01811442 |            |            |
| 49.265480    | 0.5404802   | 0.3015807   | 0.9750133   | 0.1399671   | 0.04468411  |             |            |            |            |
| 0.5062451    | 1.3346420   | 0.3954799   | 0.06277433  | 0           | 0.2491557   | 0.07713239  |            |            |            |
| 0.07032659   | 0.07748948  | 0           | 3.82233755  | 251560      | 0.1304239   | 0.02537942  |            |            |            |
| 0.05434327   | 0.1694960   | 1.5883760   | 0.4132772   | 0.1014408   | 1.300989    |             |            |            |            |



|                     |                           |                           |                            |                           |                   |
|---------------------|---------------------------|---------------------------|----------------------------|---------------------------|-------------------|
| 0.1603502           | 0.2768647                 | 0.3068015                 | 0.6894122                  | 0.01742606                | 0.03293748        |
| 0.1108901           | 0.4404665                 | 0.2134137                 | 0                          | 16.534230.4867796         | 0.4001051         |
| 0.007328252         | 0.9510073                 | 1.2922515.6209540.5966545 | 3.3050950.05217496         |                           |                   |
| 0.3146190.4116553   | 0.1210686                 | 0.008416205               | 1.1235980                  | 0.3578137                 |                   |
| 0.3426622           | 0                         | 0.001702892               | 0.2455412                  | 0.5661811                 | 0.8766077         |
| 0.03663668          | 0.4364714                 | 0.2938637                 | 0.8295415                  | 3.7399328.5500080.2231697 |                   |
| 0.01836284          | 0                         | 0.4563615                 | 0.01296493                 | 0.6406786                 | 0.2798366         |
| 1.2579950           | 0.6640138                 | 0.2012141                 | 0.1501142                  | 0.2743890.7295933         | 0                 |
| 0.2482290.3012107   | 0.09226973                | 0                         | 1.1255760.2434579          | 0                         | 0.2770558         |
| 4.2703830.005548725 | 0.02422247                | 0.03638637                | 0.05702804                 | 1.5251671.1302            |                   |
| 0.03065518          | 0.2077121                 | 0.8591816                 | 0.5872887                  | 2.6036470.3496740.1389023 |                   |
| 0.4169541           | 3.7336060.3519616         | 0.1973789                 | 0.004179208                | 0.3975707                 |                   |
| 0.2430790.5695257   | 0.02397192                | 1.5615370                 | 0.3353134                  | 0.4951451                 |                   |
| 2.0946630.1905262   | 0.4933745                 | 0.2282418                 | 0.9156631                  | 0                         | 0.05956487        |
| 0.09693665          | 0                         | 1.4478371.0975560.5754376 | 0                          | 0.9055316                 | 0.3250044         |
| 0.4632213           | 1.7361490                 | 0                         | 0.02931301                 | 0.03599511                | 1.2133960.3884966 |
| 0.3030977           | 0.1067798                 | 0.4885430                 | 1.0622020.2943822          | 0.4540071                 |                   |
| 0.06233791          | 0.2498168                 | 3.0576010.02162497        | 0.5614893                  | 1.27837                   | 1.141209          |
| 1.0452460.05784323  | 2.1239162.6692440.3330891 | 0.2988880.1026855         |                            |                           |                   |
| 0.8898744           | 0.1481215                 | 0.4807965                 | 0.06535854                 | 0.09813652                | 0.06015356        |
| 0.5734554           | 0.4171662                 | 0.5566872                 | 0.44031                    | 0.3421682                 | 1.5492270.3337231 |
| 0.5677124           | 0                         | 0.06009956                | 0.07666135                 | 0.05693105                | 1.2508620.1625022 |
| 1.3116310           | 0.8539433                 | 0.4649369                 | 0.01303561                 | 0.5175610.09196554        |                   |
| 0.1268010.6889004   | 0.2982223                 | 0.6205679                 | 0.2936444                  | 0.2256598                 | 0                 |
| 0.4417120.1104801   | 0.06708508                | 0.09647106                | 0.1065455                  | 0.2714226                 |                   |
| 0.9460455           | 1.6158460.2975106         | 0.4333066                 | 0.06512735                 | 0.1574081                 |                   |
| 0.7241931           | 0.03170024                | 0.4089497                 | 0                          | 0.03700308                | 0.4234578         |
| 0                   | 0.03830144                | 0.06352079                | 1.8463680.7672674          | 0                         | 0.2190324         |
| 0.2764809           | 0.2594997                 | 0.2984286                 | 0.1713761                  | 0.1317931                 | 0.01731788        |
| 4.3559250.1723318   | 0.4101427                 | 0                         | 0.2429821                  | 0.09136698                | 0.4913228         |
| 1.3101220.06316124  | 0.1226207                 | 0.8728933                 | 0.1802987                  | 0.3386246                 |                   |
| 0.3408992           | 0.04741566                | 3.6940694.8249320.7314291 | 0.05648277                 | 0.1986674                 |                   |
| 1.1471340.02177502  | 0.02243663                | 0.7184538                 | 0.008259427                | 0.02466266                |                   |
| TCGA-E7-A6MF        | 750                       | 0                         | 0.6892637                  | 0.2456953                 | 0.05554851        |
| 0.04701183          | 43.903730.3735535         | 0.5120940.1677179         | 0.8434744                  | 0.6659627                 |                   |
| 0.07019077          | 0.6569215                 | 0.2839146                 | 0.6704561                  | 0.01357636                | 0.1087786         |
| 0.1668162           | 0.07300661                | 0.2011062                 | 0                          | 1.91408266.7256           | 0.07756952        |
| 0.1975994           | 0.4231065                 | 0.6048459                 | 0                          | 1.1081360                 | 0                 |
| 0.3895868           | 0.1774766                 | 0.2286260.5750571         | 0.1789211                  | 0.03957217                | 0                 |
| 0.1040204           | 0.2143368                 | 0.03956187                | 0.07086286                 | 13.973520.2915365         |                   |
| 0.3172830.04754699  | 0.7404363                 | 0.3194039                 | 15.036050.3259957          | 4.249461                  |                   |
| 0.06770407          | 0                         | 0.4205234                 | 0                          | 0.009556019               | 1.0558070         |
| 0.2394272           | 0                         | 0.008838932               | 0.22467                    | 0.4132668                 | 0.6754007         |
| 0.3529618           | 0.2352875                 | 0.3251753                 | 7.1602631.4103550.05791858 | 0.01191413                |                   |

|                    |                           |                    |             |                           |                   |                   |
|--------------------|---------------------------|--------------------|-------------|---------------------------|-------------------|-------------------|
| 0                  | 0.1741737                 | 0.1009425          | 0.0346403   | 0.2950398                 | 0.5822913         | 0.5533622         |
| 0                  | 0.05942398                | 0.2877456          | 0           | 0.07912374                | 0.6682913         | 0.2278266         |
| 0.04601582         | 0.1065986                 | 0.04789298         | 0.006251105 | 0.6437401                 | 0.3159195         |                   |
| 0.06135442         | 0.2935509                 | 2.2541280.00360011 | 0           | 0                         | 0                 | 1.1671680.7332939 |
| 0.3182339          | 0.8023352                 | 0.3387051          | 0.1039209   | 1.3928040.1209998         |                   |                   |
| 0.04506113         | 0.07729347                | 1.3183290.1014928  | 0.2049006   | 0                         | 0.2063607         |                   |
| 0.09012226         | 0.3284607                 | 0.04493206         | 0.8231868   | 0                         | 0.5438931         | 0.1300803         |
| 1.8036050.09889341 | 0.4161430                 | 0.7263875          | 0           | 0                         | 0.03354358        | 0.06033185        |
| 0.6102990.4747424  | 0.7183007                 | 0                  | 0.3790483   | 0.2635858                 | 1.322403          |                   |
| 1.3220540          | 0                         | 0.03803759         | 0.04670853  | 0.6020321                 | 1.8484650.2622068 |                   |
| 0.1385612          | 0.6286232                 | 0.0564142          | 0.6265231   | 0.2728576                 | 0.3927571         |                   |
| 0.08089187         | 0.06483423                | 1.7443980.02806133 | 0.06939126  | 0.3086247                 |                   |                   |
| 0.7051775          | 0.8012746                 | 0.09553017         | 1.15179     | 5.5419270.1080570.5004485 |                   |                   |
| 0.1332483          | 0.8188102                 | 0                  | 0.6238985   | 0.06168112                | 0.09904642        | 0.507373          |
| 0.09301698         | 0.1657131                 | 0.5779015          | 0.3860552   | 0.2590056                 | 0.5124375         |                   |
| 0.09842064         | 0.6985793                 | 0.04773509         | 0.2729556   | 0.1657974                 | 0                 | 0.579701          |
| 0.1581515          | 0.9152362                 | 0                  | 0.7625375   | 0.9023546                 | 0.06766189        | 0.190077          |
| 0.1193377          | 0.09141189                | 0.2648715          | 0.1174772   | 0.3883575                 | 0.435478          |                   |
| 0.07674009         | 0                         | 0.1023538          | 0.2150442   | 0.04352598                | 0.3129606         | 1.548855          |
| 1.6436350.2832974  | 0.9494848                 | 0.2573735          | 0.3269035   | 0.03621923                |                   |                   |
| 0.1815629          | 0.3931559                 | 0.0822707          | 0.03790483  | 0                         | 0.0352121         | 0.1807545         |
| 0.09388818         | 0                         | 0.1988052          | 0.08242682  | 0.2517444                 | 0.2317626         | 0                 |
| 0.1184267          | 0                         | 0.2759780.08418398 | 0.09347449  | 0.1729650                 | 0.01123614        | 0                 |
| 1.8692980.1956709  | 0.0633590.05791858        | 0.2667941          | 0.2188819   | 0.6552676                 |                   |                   |
| 0.7785324          | 0.3551611                 | 0.02651949         | 0.2548568   | 0.03899365                | 0.3766381         |                   |
| 1.7476060.06152823 | 1.7392546.3644890.1958518 | 0.02443135         | 0           | 0.06766189                |                   |                   |
| 0.1130241          | 0                         | 0.8448887          | 0.005358862 | 0.1280126                 |                   |                   |
| TCGA-FT-A61P       | 337                       | 0                  | 0.12555983  | 0.033567843               | 0.113838771       | 0.130658394       |
| 0.457634325        | 29.20101521               | 0.492135917        | 0.159701034 | 0.085928494               | 0.21607262        |                   |
| 0.062036181        | 5.897686517               | 0.210354252        | 0.378197696 | 0.050889054               | 0.539762856       |                   |
| 0.03715439         | 0.051534356               | 0.615358889        | 0.009351042 | 0.051517314               | 0.387051823       |                   |
| 1.276808404        | 28.826086919              | 0.130064492        | 0.219348929 | 0.361290257               | 0                 |                   |
| 9.041288678        | 1.158193338               | 0.207995139        | 0.039251287 | 0.067440848               | 0.731869292       |                   |
| 0.501673256        | 0.100400661               | 0.135980528        | 0.103625085 | 0.405487659               | 0.145985437       |                   |
| 0.046187937        | 0.097611754               | 0.283767502        | 0.145223359 | 3.697972331               | 0.149365636       |                   |
| 0.02955575         | 0.087696724               | 0.758709539        | 0.286375659 | 2.921697261               | 0.041755122       |                   |
| 0.483814779        | 0.37462466                | 0                  | 0.267857685 | 0                         | 0.43783565        | 0.515173144       |
| 0.111277399        | 0.052863372               | 0.070095999        | 0.370924664 | 0.434739254               | 0.129757358       |                   |
| 0.094103509        | 0.364246806               | 0.557654392        | 0.020877561 | 0.050465941               | 0.764850259       |                   |
| 0.26426228         | 0.244565712               | 0.529892377        | 0.148369865 | 1.171983578               | 0.432399667       |                   |
| 0.035694434        | 0.103433678               | 0                  | 0.209299183 | 0.119332331               | 0.255158367       | 0                 |
| 0.152226264        | 0.02184051                | 0.099800358        | 0           | 0.171195999               | 0.155632726       | 0                 |
| 0.054614674        | 0.024537464               | 0.233796234        | 0.365843504 | 0.404645088               | 0.565817284       |                   |
| 1.706760412        | 1.178938931               | 0.121735593        | 0           | 0                         | 1.364901659       | 0.571986631       |

|              |             |             |             |             |             |             |
|--------------|-------------|-------------|-------------|-------------|-------------|-------------|
| 0.500927199  | 0.366848568 | 0.147727572 | 0.101227004 | 0           | 0.678262242 | 0.03099649  |
| 0.092346389  | 0           | 1.294577734 | 0           | 0.367425374 | 0.011113848 | 0           |
| 0.210354252  | 0.747279797 | 0.389308685 | 0           | 0           | 0.076743034 | 0.885013233 |
| 0.03800025   | 1.754853604 | 0.050580636 | 1.261883241 | 0.231827915 | 1.900823899 |             |
| 0.842099237  | 0           | 0.882862009 | 0.060807322 | 0.09564201  | 0           | 0.155361116 |
| 0.162054465  | 0.123185313 | 0.373228544 | 0           | 0.10287587  | 0.077952644 | 0.239306235 |
| 0.142359146  | 0.301331448 | 0           | 0.141980733 | 0.300233355 | 0.057806441 | 0.085597999 |
| 0.503264619  | 0           | 0           | 0.730776949 | 0.576344884 | 0.08626155  | 0.106655654 |
| 0.158120638  | 1.011612719 | 0.096324212 | 1.349452594 | 0.29505371  | 0.167020486 |             |
| 0.05536189   | 0.102559815 | 0.081922012 | 0.527075163 | 0.131300766 | 0.159823913 |             |
| 0.079004188  | 0.014498684 | 0.439910652 | 0           | 0.056600915 | 0.444122657 | 0.308554466 |
| 0.037913935  | 0.282737493 | 0.10891752  | 0.331879962 | 0.293478855 | 0           | 0.237844823 |
| 0.454193466  | 0.237602987 | 0.378127084 | 0.400357326 | 0.020818971 | 0.301422015 |             |
| 0.209653071  | 0.883979339 | 0.064922637 | 0.040760952 | 0.749342755 | 0.101778109 |             |
| 0.09913354   | 0.152154214 | 0.055778145 | 0.055871497 | 0.039182183 | 0.188783523 | 0           |
| 0            | 0.128273659 | 0.821298997 | 0.320799709 | 0.387051823 | 0.445920361 | 0.102559815 |
| 0.254578035  | 0.012371028 | 0.116277324 | 3.26544715  | 0.54795689  | 0           | 0           |
| 0.478894628  | 0.222258454 | 0           | 0.049346962 | 0.050927871 | 0.084461024 | 0.2579572   |
| 0.702753609  | 0.182421966 | 0.485397597 | 0.201224953 | 0           | 0.08626155  | 0.027366099 |
| 0.050638179  | 0           | 0.046053761 | 0           | 0.820898846 | 0.143214156 | 0.038953582 |
| 4.629139803  | 0.086984008 | 0.037380609 | 0.181469992 | 0.211646845 | 0.1959602   |             |
| 0.054347936  | 0.197310642 | 0.599339672 | 0.096483294 | 0.279802361 | 0.283710083 |             |
| 0.478145074  | 4.188643016 | 0.025728878 | 0.325445712 | 0           | 0.138663426 | 0.048255594 |
| 0            | 0.507502558 | 0.005491113 | 0.087447858 |             |             |             |
| TCGA-DK-AA77 | 618         | 0           | 0.08026753  | 0.2918445   | 0.05821962  | 0.3118339   |
| 0.04927245   | 75.639380   | 0.05593089  | 0.2566915   | 0.3222684   | 0.5525211   | 0           |
| 0.07036745   | 0.4303189   | 0.7141607   | 0.1995309   | 0.05976263  | 0           | 0.007530225 |
| 0.2447728    | 0.02869396  | 0.02634707  | 0           | 2.63371673  | 5.76640     | 1.478173    |
| 0.06903373   | 0           | 0.2305202   | 0           | 0.5110257   | 0           | 0.2007396   |
| 0.5444274    | 0.1218691   | 0.08557846  | 0.1854491   | 0.1386052   | 0.04740004  |             |
| 0.02239804   | 0.1108394   | 0.09984154  | 0.2073212   | 0           | 3.4364910   | 0.06046181  |
| 0            | 0.6467009   | 0.3766082   | 5.8339230   | 1.281269    | 0.5773446   | 0.09934358  |
| 0.5241289    | 0.1234930   | 0.0143079   | 0.9484946   | 0.1138194   | 0.4325676   |             |
| 0.2867889    | 0           | 0.004631981 | 0.08990809  | 0.2887595   | 0.2980540   | 0.2074157   |
| 0.01423632   | 0.2494907   | 0.08503501  | 0.3643160   | 0.7087652   | 4.1881580   | 0.2428146   |
| 0.1123833    | 0.02010351  | 0.2190589   | 0.03526549  | 0.03630601  | 0.2854404   |             |
| 0.3051457    | 0.4349784   | 0           | 0.06228145  | 0.1005274   | 0.2041603   | 0.04146425  |
| 0.6420579    | 0           | 0           | 0.1396557   | 0.1505879   | 0.003275849 | 0.3458521   |
| 0.04138886   | 0.1929142   | 0.2696404   | 2.0425960   | 0           | 0           | 0.07756004  |
| 0.9573591    | 0.4025765   | 0.3335366   | 0.1313932   | 0.4585315   | 0.03630601  |             |
| 0.9972744    | 0.1902273   | 0.04722795  | 0.04050511  | 1.5774660   | 0.1595598   |             |
| 0.2147535    | 0.01705159  | 0.1622129   | 0.1889118   | 0.3012233   | 0.03260262  |             |
| 0.7300367    | 0           | 0.1140094   | 0.1032844   | 1.9835190   | 0.1036488   | 0.2851775   |
| 0.05173607   | 0.7613166   | 0.06774962  | 0.1620204   | 0.4482461   | 0.06323298  |             |

|              |            |            |            |             |            |             |
|--------------|------------|------------|------------|-------------|------------|-------------|
| 0.5393093    | 0.4975710  | 0.2509470  | 0.04215532 | 0.2780927   | 0.1105042  | 0.04199976  |
| 0.5514230    | 0          | 0.1993334  | 0          | 0.1941482   | 0.4403070  | 0.2290128   |
| 0.3294257    | 0          | 0.08755335 | 0.1715870  | 0.1234930   | 0.9513261  | 0.5016590   |
| 0.1818201    | 0.4043316  | 0.7390867  | 0.5864559  | 0.07866874  | 0.9484946  |             |
| 0.7687611    | 0.05662655 | 0.1966924  | 0.02793113 | 0.4620989   | 0.1007251  |             |
| 0.04086871   | 0.06464713 | 0.04448965 | 0.3476961  | 0.04874491  | 0.1389453  |             |
| 0.2523711    | 0.3884343  | 0.07756004 | 0.4131374  | 0.1939282   | 0.585737   |             |
| 0.5003049    | 0.04086871 | 0.1042620  | 0.3871407  | 0.2430307   | 0          | 0.6619361   |
| 0.3771529    | 0.5168608  | 0.01772887 | 0.1726548  | 0.1250762   | 0.2107766  |             |
| 0.4164123    | 0.1665826  | 0.1735872  | 0.1141046  | 0.08889657  | 0          | 0.4291022   |
| 0            | 0          | 0.06560193 | 0.2056092  | 0.5332078   | 1.18768    | 0.8707492   |
| 0.3974427    | 0.0506145  | 0.0951468  | 0.1876051  | 0.08622679  | 0.1191826  | 0           |
| 0.04697041   | 0.3106920  | 0.1968058  | 0          | 0.1562737   | 0.0431952  | 0.5276997   |
| 0.8080381    | 0.06219637 | 0.17377    | 0          | 0.1446243   | 0          | 0.1049671   |
| 0            | 0.01177645 | 0.0100017  | 1.6793020  | 0.02929713  | 0.09296797 | 0.182111    |
| 0.1016812    | 0.01911725 | 0.3229708  | 0.4995729  | 0           | 0          | 0.2671119   |
| 0.08173742   | 0.06579154 | 0.7212089  | 0.06448689 | 0.5779889   | 2.996317   |             |
| 0.1421097    | 0.02560615 | 0          | 0.4254929  | 0.01974317  | 0.03051457 | 0.5343632   |
| 0.01684965   | 0.07826478 |            |            |             |            |             |
| TCGA-ZF-AA5N | 168        | 1          | 0          | 0           | 0.1338253  | 0.1365315   |
|              | 0.1340997  | 0.1346865  | 0.2540083  | 0           | 0.5073028  | 0.1978288   |
|              | 0.0598236  | 0.05233225 | 0.1747102  | 0           | 0          | 0           |
|              | 1.61771982 | 0.372280   | 0.08494434 | 0           | 0          | 0           |
|              | 0.1564296  | 0.1179503  | 0.2360558  | 0.3197090   | 0.1499304  | 0.09533576  |
|              | 0.05148479 | 0.05847381 | 0.05737468 | 0.1906219   | 0          | 4.1351630   |
|              | 0.06948966 | 0.02290968 | 0.4459578  | 0.2885609   | 5.2732550  | 0.2945162   |
|              | 0.3791718  | 0.1957321  | 0          | 0.7666771   | 0          | 0.006577713 |
|              | 0          | 0.2472081  | 0          | 0.005323605 | 0.1082533  | 0.3318755   |
|              | 0.3575789  | 0          | 0.0395508  | 0.0195464   | 0.02701379 | 0.4791732   |
|              | 0          | 0.02870308 | 0.01540351 | 0.1258838   | 0          | 0           |
|              | 0.1333139  | 0          | 0.0715810  | 0.1925627   | 0          | 0           |
|              | 0          | 0          | 0.2606511  | 0           | 0          | 0.1589239   |
|              | 0.0891409  | 1.7115890  | 0.9253743  | 0           | 0          | 0.2379987   |
|              | 0          | 0.7146152  | 0          | 0.2468194   | 0.02613019 | 0           |
|              | 0.9153185  | 0.4025055  | 0          | 0.05697899  | 1.3157930  | 0.1191251   |
|              | 0.06953583 | 0          | 0.09310625 | 0.06060893  | 0          | 0.3459551   |
|              | 0.02933056 | 0.09689946 | 0.09131887 | 0           | 0.5792514  | 0.6500088   |
|              | 0.2418754  | 0          | 0          | 0.9108924   | 0          | 0           |
|              | 0.2012527  | 0          | 0.3784862  | 0           | 0.1561962  | 0.5859747   |
|              | 0.5096660  | 0.2372559  | 0.03287823 | 0.2973052   | 0.09817206 | 0           |
|              | 0.4552261  | 0.1543531  | 0          | 0.01857498  | 0          | 0           |
|              | 0.3720278  | 0.2674227  | 0.2848950  | 0.06639115  | 0.2447986  | 0.1150016   |
|              | 0          | 0.1862125  | 0          | 0.6318284   | 0          | 0.2752174   |
|              | 0.09583463 | 0.2642713  | 0.2392944  | 0.06659333  | 0.1788678  | 0.1311421   |

|                            |                           |                    |                    |                            |                   |               |
|----------------------------|---------------------------|--------------------|--------------------|----------------------------|-------------------|---------------|
| 0.07784392                 | 0                         | 0.2959041          | 0.1726921          | 0                          | 0.3015891         | 0.03600909    |
| 0.2828417                  | 0.5687577                 | 0.6671766          | 0.1377899          | 0.1890152                  | 0.058172          |               |
| 0.05467681                 | 0.3388273                 | 0.09910172         | 0.09131887         | 0.1376992                  | 0.1079676         |               |
| 0.08709339                 | 0.1507946                 | 0                  | 0                  | 0.09928977                 | 0.1882220.4159165 | 0             |
| 0.2282474                  | 0.09462154                | 0.2659502          | 0.2028128          | 0.04825611                 | 0.05952868        | 0             |
| 0.02706969                 | 0.2069119                 | 1.3939230.2020298  | 0                  | 0.6976761                  | 0.2045114         |               |
| 0.2197174                  | 0.1194651                 | 0.1913888          | 0.0658185          | 0                          | 0.1637310         | 0.1512304     |
| 0.6578540                  | 0.6131919                 | 0.6544609          | 0.04839372         | 0                          | 0.3105383         | 0 0 0         |
| 0.5264156                  | 0                         | 0.1542015          |                    |                            |                   |               |
| TCGA-DK-AA6U               | 578 0                     | 0.08983289         | 0.2470259          | 0.1396234                  | 0.2492819         |               |
| 0.03938869                 | 40.232630                 | 0.09327307         | 0.6557685          | 0.4416888                  | 0.1521749         |               |
| 0.2275656                  | 0.5847992                 | 0.9752950.1178959  | 0.02047483         | 0                          | 0.04213795        |               |
| 0.02795327                 | 0.09175249                | 0.02106201         | 0.1054932          | 3.55541526.7576            | 0.08862456        |               |
| 0.2069474                  | 0.1772491                 | 0                  | 0                  | 3.1010160.1275531          | 0.2888504         | 0             |
| 0.9792418                  | 0.57941                   | 0.4378364          | 0.2964982          | 0.2802635                  | 0.08052025        |               |
| 0.05371538                 | 0.1118465                 | 0.2294651          | 0.4309080          | 12.979830.4478151          |                   |               |
| 0.09666707                 | 0.02390225                | 0.8788602          | 0.1338057          | 2.5413480.1365672          |                   |               |
| 1.0549320.06807074         | 0                         | 1.1331820.2961631  | 0.02401943         | 1.6428370.09098788         |                   |               |
| 0.04322465                 | 0.5731520                 | 0.01295992         | 0.2395769          | 0.07694536                 | 0.2680494         |               |
| 0.2072617                  | 0.0113806                 | 0.1237930.03398875 | 0.3851836          | 1.2331693.072318           |                   |               |
| 0.09705374                 | 0.02994664                | 0                  | 0.1459308          | 0.1127658                  | 0.02902325        | 0.3993199     |
| 0.1951483                  | 0.1854530.01963061        | 0.1991527          | 0.09375591         | 0.1632070.06629354         |                   |               |
| 1.07319 0                  | 0                         | 0.1041988          | 0                  | 0.002618733                | 0.6118737         | 0 0 0.1105396 |
| 2.5968430.0150817          | 0                         | 0                  | 0.09300295         | 3.2738631.5213410.06665779 |                   |               |
| 0.1417993                  | 0.5202686                 | 0.1451162          | 0.9127673          | 0.02534481                 | 0.1510172         |               |
| 0.1295201                  | 2.6325280.1700708         | 0.6008634          | 0.004543715        | 0.1296739                  |                   |               |
| 0.6418232                  | 0.3095996                 | 0.0984592          | 1.4855160          | 0.09113978                 | 0.1618296         |               |
| 2.3731340.1035719          | 1.3007850.2481488         | 0.3063158          | 0.02707973         | 0.06476006                 |                   |               |
| 0.7236874                  | 0.1010976                 | 1.0226740.1988806  | 0.1088046          | 0                          | 0.1270337         |               |
| 0.2650133                  | 1.6115941.0963760.1801740 | 0                  | 0.03913457         | 0.5820121.583928           |                   |               |
| 0.03661484                 | 0                         | 0.3124431          | 0.04726643         | 0.3499534                  | 0                 | 0.2303491     |
| 0.03388748                 | 0.3802479                 | 0.8374388          | 0.1410665          | 0.1744177                  | 0.2585801         |               |
| 1.1225780.2962920.05145403 | 0.2412558                 | 1.2632460.1810704  | 0.1362722          |                            |                   |               |
| 0.08931326                 | 0.7476046                 | 0.1342004          | 0.1960242          | 0.1356582                  | 0.0474204         |               |
| 0.1308002                  | 0.1948349                 | 0.2314036          | 0.4438433          | 0.3881460.3410108          |                   |               |
| 0.5944762                  | 0.2012058                 | 2.0166320.3199574  | 0.09801208         | 0.1666954                  |                   |               |
| 0.06189652                 | 0.4857004                 | 0.08833775         | 1.2735610.03404598 | 1.09353                    | 0.5186749         |               |
| 0.1133805                  | 0.08493618                | 0.06665779         | 0.3369922          | 0.3883629                  | 0.3416026         |               |
| 0.2583931                  | 0.09121592                | 0.1032127          | 0                  | 1.2520480.1201160          | 0.1573278         |               |
| 0.1847152                  | 0.3934611                 | 0.9098788          | 1.2927240.2276195  | 0.4163202                  |                   |               |
| 0.1011538                  | 0.1140914                 | 0.3856440.03446511 | 0.4446179          | 0                          | 0.008046091       |               |
| 0.2544268                  | 0.1048852                 | 0.04034939         | 0.1665682          | 0                          | 0.2763821         | 2.3381030     |
| 0.07937874                 | 0                         | 0.2312271          | 0.07053324         | 0.1062877                  | 0.3519440.35822   | 0             |
| 0.5996565                  | 2.8340490.07026091        | 0.1274043          | 0.09705374         | 0.2336931                  |                   |               |

|              |             |             |             |                 |             |
|--------------|-------------|-------------|-------------|-----------------|-------------|
| 0.08023286   | 0.2670877   | 0.4659219   | 0.1831203   | 0.04443853      | 0.4555326   |
| 0.1306828    | 0.1314854   | 0.6405986   | 0           | 1.2084332.28689 | 0.1893389   |
| 0.06140914   | 0           | 0.3401416   | 0.04734842  | 0               | 0.5614276   |
| 0.01346971   |             |             |             |                 |             |
| 0.1251307    |             |             |             |                 |             |
| TCGA-BT-A20O | 370         | 1           | 0.105206328 | 0.150007615     | 0.190770553 |
| 0.210847298  | 0           |             |             |                 |             |
| 25.395844416 |             | 0.244361299 | 0.382323354 | 0.191998163     | 0.362093623 |
| 0            |             |             |             |                 |             |
| 2.525853592  | 0.376011525 | 0.260013199 | 0.066328634 | 0.0528421       | 0.124526355 |
| 0.016449727  | 1.183988673 | 0.073128712 | 0.057555005 | 0.072068876     | 1.858343336 |
| 39.764215547 |             | 0.121089751 | 0.452411138 | 0.403632502     | 0.1888387   |
| 0            |             |             |             |                 |             |
| 0.380567788  | 0.058092902 | 0.131554297 | 0.414396035 | 0.668980147     | 0.126105302 |
| 0.130861906  | 0.15191708  | 0.195917896 | 0.232976428 | 0.260951259     | 0.166711049 |
| 0.122683037  | 0.045289184 | 0.283925505 | 0           | 0.111247258     | 0.165098022 |
| 0.174176968  |             |             |             |                 |             |
| 0.635721191  | 0.27423267  | 3.145146943 | 0.279892257 | 1.486420562     | 0.201514282 |
| 0.09347279   | 0.28623902  | 0.629462332 | 0.042194945 | 0.23022002      | 0.062159405 |
| 0.295294087  | 0.078311062 | 0.037672367 | 0.010118532 | 0.126259465     | 0.105132187 |
| 0.24416133   | 0.906196342 | 0.062198279 | 0.159744503 | 0.111455041     | 0.37225044  |
| 0.910760517  | 0.645812003 | 0.331516828 | 0.06819463  | 0.007319329     | 0.119633178 |
| 0.115555827  | 0.039655123 | 0.207847541 | 0.133317759 | 0.443430153     | 2.01163124  |
| 0.204080127  | 0.170801114 | 0.222993382 | 0.181156737 | 0.382519417     | 0.347744925 |
| 0            |             |             |             |                 |             |
| 0.122030734  | 0           | 0.064404622 | 0.359177635 | 0.226034201     | 0           |
| 0.275634721  |             |             |             |                 |             |
| 1.102069456  | 0.206064662 | 0.03598229  | 0           | 0.127072038     | 0.929486435 |
| 0.319791153  |             |             |             |                 |             |
| 0.227690129  | 0.0645812   | 0.161557909 | 0           | 1.010337001     | 0.173145976 |
| 0.154753706  |             |             |             |                 |             |
| 0.176966278  | 1.144462495 | 0.116185804 | 0.234563794 | 0.00620818      | 0.059058817 |
| 0.154753706  | 0.423012966 | 2.290916338 | 0.144978205 | 0               | 0.041508785 |
| 0.194036619  |             |             |             |                 |             |
| 1.512182024  | 0.14151259  | 1.39251726  | 0           | 2.924176675     | 0.480995398 |
| 0.132724709  |             |             |             |                 |             |
| 0.038399633  | 0.069066006 | 0.315077977 | 0.067933776 | 0.097559605     | 0.046044004 |
| 0.477314805  | 0.120697874 | 0.0458741   | 0.679506543 | 0.295411035     | 0.268176171 |
| 1.088606047  | 0.053470456 | 0.212057673 | 0.288554299 | 0.150083071     | 0.158620492 |
| 0.451292224  | 0.193743601 | 0.812853762 | 0.374830585 | 0.134884785     | 0.092602466 |
| 2.597706491  | 0.426360225 | 0           | 0.03971847  | 0.441629878     | 0.887991504 |
| 0.174230815  |             |             |             |                 |             |
| 0.171851325  | 0.65926642  | 0.373189675 | 0           | 0.128901993     | 0.122030734 |
| 0.636916091  |             |             |             |                 |             |
| 0.146688862  | 0.178554845 | 0.132394899 | 0.080989453 | 4.311505921     | 0.212965843 |
| 0.113821902  | 0.220521172 | 0.371232851 | 0.254144076 | 0.406123156     | 0.130695868 |
| 0.327154765  | 1.256849514 | 0           | 0.113879827 | 2.114265487     | 0.353932557 |
| 0.844885121  |             |             |             |                 |             |
| 1.256055011  | 0.023258898 | 0.457715542 | 0.33031568  | 0.116185804     | 0.2756193   |
| 0.182152103  | 0.272078205 | 0.303216611 | 0.126573399 | 0.241903549     | 0.062315193 |
| 0.161828298  | 0           | 0.164039901 | 0.246175863 | 0.298963072     | 0.214960479 |
| 0.603146746  |             |             |             |                 |             |
| 0.268797428  | 0.324309941 | 1.177518789 | 0.196422084 | 1.332254563     | 0.069104397 |
| 0.181866599  | 0.032932135 | 0.188361834 | 0.08678451  | 0               | 0.076954901 |
| 0.2731372    |             |             |             |                 |             |
| 0.10748024   | 0.110260586 | 0.113792962 | 0.141539443 | 0.387564637     | 1.207451863 |
| 0            |             |             |             |                 |             |
| 0.298256689  | 0.044961595 | 0           | 0.096371171 | 0.084076663     | 0.169718513 |
| 0            |             |             |             |                 |             |
| 3.344323928  | 0.07647027  | 1.222807973 | 0           | 0.058025116     | 0.265213463 |
| 0.124943528  |             |             |             |                 |             |
| 0.093963409  | 0.450077886 | 0.600222495 | 0.031275172 | 0.121434736     | 0.291752098 |
| 1.785548447  | 0.071860584 | 0.925279556 | 0.21130676  | 0.485620354     | 9.418316087 |

|              |             |             |            |             |                |             |             |
|--------------|-------------|-------------|------------|-------------|----------------|-------------|-------------|
|              | 0.149470015 | 0.503428254 | 0          | 0.154914406 | 0.291119504    | 0.333294398 | 0.650359975 |
|              | 0           | 0.195393023 |            |             |                |             |             |
| TCGA-GD-A3OS | 638         | 0           | 0.4165164  | 0.1346603   | 0              | 0.5196677   | 0.1337859   |
|              | 33.355540   | 0.0337478   | 0.3660884  | 0.6187097   | 0.4000589      | 0.1244318   | 4.22849     |
|              | 0.3115771   | 0.0772830   | 0.5129820  | 0.2764586   | 0.1605133      | 0.01817447  | 0.3797794   |
|              | 0.02308463  | 0.0158974   | 0.1592505  | 2.69672659  | 949850.1114883 | 0.4790192   |             |
|              | 0.5351437   | 0.03477305  | 0          | 0.8829871   | 1.6366890      | 0.2906953   | 0.1248669   |
|              | 1.0676210   | 0.7740409   | 0.1962194  | 0.3916394   | 0.2508965      | 0.3932559   |             |
|              | 0.06757308  | 0.1074445   | 0.1280159  | 0.2251698   | 0.8066440      | 0.7375621   |             |
|              | 0.3687344   | 0.2371310   | 0.05412355 | 0.8584597   | 0.5807227      | 4.11157     | 0.4123183   |
|              | 2.3887571   | 1.4728680   | 0.5678143  | 0           | 0.08028837     | 0.9856389   | 0.03433839  |
|              | 0.2610044   | 0.5191315   | 0.1873003  | 0.002794863 | 0.3022450      | 0.8130865   |             |
|              | 0.5844832   | 0.03128782  | 0.06871972 | 0.3270323   | 0.3181143      | 0.319097    |             |
|              | 1.2829730   | 0.2973021   | 0.09156903 | 0.4445343   | 2.4462440      | 0.1652208   | 0.2766222   |
|              | 0.02190647  | 0.1865827   | 0.3682401  | 0.8398688   | 0.3704249      | 0.206688    |             |
|              | 0.2291472   | 0.1231870   | 0.07505658 | 0.5282829   | 1.0565660      | 0.1629142   |             |
|              | 0.1211498   | 0.01185957  | 0.8552525  | 0.02497337  | 0.1940022      | 0.5944687   |             |
|              | 2.4797880   | 0.07968464  | 0.03975501 | 0.02985947  | 0.2807909      | 1.4120460   | 0.9716328   |
|              | 0.2012506   | 0.4518991   | 0.3480694  | 0.2190647   | 1.9011480      | 0.01913002  |             |
|              | 0.02849659  | 0.1466408   | 2.2371190  | 0.1925517   | 0.8746570      | 0.02057731  | 0.03262555  |
|              | 0.3134625   | 0.7270131   | 0.6382437  | 0.8809849   | 0.1056566      | 0.02293048  |             |
|              | 0.3440071   | 1.6225390   | 0.1016276  | 0.2935337   | 0.2809504      | 1.2716230   | 0.1430766   |
|              | 0.3177217   | 0.1962194   | 0.03815376 | 2.2400360   | 0.2251698      | 0.1257534   |             |
|              | 0.4578452   | 0.4554481   | 0.1666912  | 0.4054717   | 1.4588480      | 0.02719872  | 0           |
|              | 1.37113     | 0           | 0.4685835  | 0.5579158   | 0.1658192      | 0.3285970   | 0.5592516   |
|              | 0.3567625   | 0.5811112   | 0.2070657  | 0.3228926   | 0.05115588     | 0.8200212   |             |
|              | 1.0550870   | 0.01774594  | 0.06582438 | 0.1219836   | 1.3824550      | 0.06227902  | 0.8371533   |
|              | 0.9365015   | 1.0050260   | 0.2733404  | 0.3639553   | 0.03370639     | 0.5510075   |             |
|              | 0.08103454  | 0.2219357   | 0.5070916  | 0.04474057  | 0.3208618      | 0.05882379  |             |
|              | 0.2235663   | 0.6091066   | 0.3271485  | 0.3041901   | 0.4985610      | 0.2340263   |             |
|              | 1.3775520   | 0.3622511   | 0.3205738  | 0.2726101   | 0.2803134      | 0.6110033   |             |
|              | 0.8667942   | 0.5652549   | 0.02569758 | 0.7224381   | 0.1924277      | 1.005548    |             |
|              | 0.1682861   | 0.3270323   | 1.4452180  | 0.8375216   | 0.2709488      | 0.3864536   |             |
|              | 0.03442445  | 0.1200487   | 0          | 0.6343378   | 0.09066241     | 0.1926803   | 0.3166652   |
|              | 3.3118450   | 0.4207226   | 0.3583136  | 0.4253206   | 0.1537202      | 0.8021249   |             |
|              | 0.1145249   | 0.2152877   | 1.2007070  | 0.07804179  | 0.3835352      | 0           | 0.1477791   |
|              | 0.2423348   | 0.1979158   | 0.1522767  | 0.2828792   | 0.1824430      | 0.4995673   |             |
|              | 1.4252820   | 0.1501132   | 0.2097001  | 0.07451368  | 0.1221696      | 0.05323781  |             |
|              | 0.1055591   | 0.3125223   | 0.3785334  | 0.04974003  | 0.5672774      | 1.801358    |             |
|              | 0.05303226  | 0.1682861   | 0.03662761 | 0.2224038   | 0.3489351      | 0.3875108   |             |
|              | 1.6578881   | 0.2094020   | 0.01677089 | 0.2972712   | 0.3919740      | 0.07939512  | 0.2935643   |
|              | 0.3112828   | 1.9851886   | 0.0864230  | 0.2635918   | 0.3244572      | 0.1630309   | 0.3423141   |
|              | 0.4526830   | 0.07364802  | 0.4421845  | 0.003388935 | 0.08095494     |             |             |
| TCGA-XF-A9SZ | 859         | 1           | 0.01797735 | 0.05767396  | 0.1955899      | 0.2328026   |             |

|              |            |            |            |            |            |            |            |
|--------------|------------|------------|------------|------------|------------|------------|------------|
| 0.02758862   | 47.4606    | 0          | 0.1567928  | 0.1640405  | 0          | 0.03552876 | 1.242895   |
| 0.1445665    | 0.5664864  | 0.01942979 | 0.2900065  | 0.04255741 | 0.1011917  |            |            |
| 0.1566322    | 0.02142175 | 0.3540540  | 0.07388953 | 2.16935    | 54.065830  | 0.0662127  |            |
| 0.07730671   | 0.3310635  | 0.06453643 | 0.2276061  | 0.9624488  | 0.7742863  |            |            |
| 0.04495924   | 0.03862407 | 0.07620893 | 0.1364739  | 0.03833367 | 0.2595915  |            |            |
| 0.1095640    | 0.1857816  | 0.05852516 | 0.07528735 | 0.05590326 | 0.04643331 |            |            |
| 0.1663418    | 6.0953250  | 0.06770754 | 0.05580536 | 0.7966215  | 0.3748807  |            |            |
| 2.0277640    | 0.09565437 | 0.9236191  | 0.5244590  | 0.09583417 | 0.4935635  | 0          |            |
| 0.05287444   | 3.3635130  | 0          | 0.6423153  | 0.3476167  | 0.1167092  | 0.1678044  |            |
| 0.05389406   | 0.8344317  | 0.4645447  | 0.07174077 | 0.1926825  | 0.06665791 |            |            |
| 0.1710865    | 0.3735075  | 1.60014    | 0.1699459  | 0.3216201  | 0.02251271 |            |            |
| 0.1839832    | 0.07898339 | 0.04065692 | 0.3995594  | 0.06834286 | 0.3896849  | 0          |            |
| 0.03487262   | 0.09381215 | 0.3429402  | 0          | 0.1960914  | 0          | 0          | 0.02085226 |
| 0.05621144   | 0.05135796 | 0.1333324  | 0.04634889 | 0.07201098 | 0.394863   |            |            |
| 2.0117920    | 0.2239466  | 2.9513040  | 0.3474193  | 1.9059360  | 0.6557399  | 0          |            |
| 0.07356966   | 0.6128654  | 0.08131384 | 0.5503011  | 0          | 0.05288774 | 0          |            |
| 2.3596440    | 0.05956049 | 0.3006119  | 0.01909505 | 0          | 0.2115509  | 0.09637765 |            |
| 1.0466120    | 0.3716019  | 0          | 0.08511482 | 0.0601442  | 0.9540824  | 0.08705255 |            |
| 0.7326335    | 0          | 1.5921840  | 0.03793436 | 0.3175146  | 0.2559031  | 0          | 1.1517     |
| 0.2785999    | 0.09526117 | 0          | 0.1334654  | 0          | 0.5173630  | 0.6966727  | 0.2523949  |
| 0.1178362    | 0          | 0          | 0.2174148  | 0.5423806  | 0.1538746  | 0.08131384 |            |
| 0.2313465    | 0.0662127  | 1.8138460  | 0.09219489 | 0          | 0.6848567  | 0.2274867  |            |
| 0.5598994    | 0.1221656  | 0.3622293  | 0.7448928  | 0.3572647  | 0.3684030  |            |            |
| 0.1913087    | 0.06341266 | 0.0440528  | 0          | 0.4558723  | 0.3007892  | 0.09153281 |            |
| 0.1628875    | 0.01660709 | 0.2290376  | 0          | 0.1166974  | 0.2260921  | 0.4349842  |            |
| 0.1302822    | 0.04626477 | 0.1478594  | 1.42367    | 0.05602613 | 0.04576641 |            |            |
| 0.3113513    | 0.4335355  | 0.09071846 | 0.5568616  | 0.7977994  | 0.09538592 |            |            |
| 0.3754229    | 0.2031962  | 0.4566304  | 0.04461824 | 0.4668844  | 0.236036   |            |            |
| 0.3497363    | 0.1297710  | 0.1675775  | 0          | 0.05214519 | 0          | 1.2733930  | 0          |
| 1.4582460    | 0.09186266 | 0.38792    | 0.2321666  | 0.0839101  | 0.6906291  | 0.05668013 |            |
| 0.1864610    | 0.5777411  | 0.09656018 | 0.1334654  | 0          | 0.1728264  | 0.2036636  | 0          |
| 0.2260921    | 0          | 0.2902302  | 0.2649037  | 0.6189777  | 0          | 0.02779922 | 0          |
| 0.1295649    | 0          | 0.04701855 | 0.02900101 | 0          | 0          | 0.1567124  | 0.06561619 |
| 0            | 2.1073290  | 0.2704332  | 0.05352066 | 0.02494314 | 0.2237766  | 0          | 0.03112563 |
| 0.1794735    | 0.04576641 | 0.07367598 | 0.4679175  | 0          | 1.4936653  | 0.993071   |            |
| 0.0530467    | 0.5734958  | 0          | 0          | 0.03316377 | 0          | 0.7864701  | 0          |
| TCGA-4Z-AA82 | 1556       | 1          | 0.04771186 | 0.1530665  | 0.1153545  | 0.4119051  |            |
| 0.17084727   | 4.18090    | 0.1108197  | 0.3236548  | 0.0870726  | 0.4378991  | 0.09429326 |            |
| 0.7541561    | 0.4689411  | 0.4421922  | 0.1461054  | 0.2142689  | 0          | 0          |            |
| 0.3810597    | 0.05685329 | 0.1044065  | 0          | 1.15005240 | 0.625540   | 0.3002026  |            |
| 1.1113471    | 1.6108430  | 0.1141863  | 1.5101651  | 0.0585540  | 0.4742202  | 0.1193217  |            |
| 0.2733552    | 0.5056458  | 0.1779235  | 0.1017375  | 0.2755821  | 0.1130821  |            |            |
| 0.04108866   | 0.1849115  | 0.1494093  | 0.04945571 | 0.08215593 | 0          | 2.35343    | 0          |
| 0.05989855   | 0.02962146 | 0.3844057  | 0.7876549  | 4.7207720  | 0.2538665  |            |            |



|              |            |             |            |            |            |            |
|--------------|------------|-------------|------------|------------|------------|------------|
| 0.7762396    | 0.4217918  | 0.2543437   | 0.4366388  | 0.04078084 | 0.181435   |            |
| 1.3050810    | 0.1607017  | 0.3196319   | 0          | 0.1124263  | 0.0721047  | 0.1907129  |
| 0.2583676    | 0.3082251  | 0.04231108  | 0.1193217  | 0.1347885  | 0.2212103  |            |
| 0.7021624    | 0.6345746  | 0.09020722  | 0.06185355 | 0.1062199  | 0.3255272  |            |
| 0.08734238   | 0.2158067  | 0.09426041  | 0.0604606  | 0.1149136  | 0          | 0.246805   |
| 0.08299241   | 0.2022583  | 0.2053898   | 0.5782514  | 0.1577049  | 0.04777925 |            |
| 0.05534185   | 0.3232342  | 0.01298132  | 0.7301954  | 0.1640131  | 0          | 0.5239827  |
| 0.4388459    | 0.1420468  | 0.03263647  | 0.04902566 | 0.4610250  | 0.4215290  | 0.5801107  |
| 0.1652147    | 0.03905074 | 0.8205984   | 0.1079034  | 0.8304791  | 0.5025472  | 0          |
| 0.2006388    | 1.9734250  | 0.05269113  | 0.2127529  | 0.02815456 | 0          | 1.169699   |
| 0.2984171    | 0.8433599  | 0.7232357   | 0.7806394  | 0          | 0.1800870  | 0.698974   |
| 0.1155186    | 1.2962720  | 1.2886750   | 0.03355923 | 0.3611499  | 0.06095082 | 0          |
| 0.6709628    | 0.1848509  | 0.07163316  | 0          | 0.3148594  | 0.2189496  | 0.7489529  |
| 0.5602933    | 0          | 0.03474854  | 0          | 0.09699701 | 0.3846790  | 0.8724102  |
| 0.2877423    | 0.8186576  | 0.05857611  | 0.3903197  | 0.1133256  | 0.2039042  |            |
| 0.08399182   | 0.4039129  | 0.7655380   | 0.1080757  | 0.2002824  | 0.2928806  |            |
| 0.1115506    | 0.6872526  | 0.3844057   | 0.4231108  | 0.1121980  | 0.1818694  |            |
| 0.05534185   | 0.4141946  | 0.06652449  | 0          | 0.1841290  | 0.04407519 | 0.8510115  |
| 0.0482908    | 0.1720636  | 0.6000480   | 0.3447307  | 0.3457687  | 0.2865020  | 0.3515416  |
| 0.3297047    | 1.1895460  | 0.3787326   | 0.07670682 | 0.4414054  | 0.4378991  |            |
| 1.2170640    | 0.3350893  | 0.2669175   | 0.7728032  | 0.1315741  | 0.2065183  |            |
| 1.0630480    | 0.3093997  | 0.05022673  | 0.3320802  | 0.1130416  | 0.1258120  |            |
| 0.04251047   | 0          | 0           | 0.1299816  | 0.3530691  | 0.8126776  | 0.3922053  |
| 0.4929356    | 0.0742324  | 0.3937401   | 0          | 0.07069531 | 0.2986994  | 0.04271175 |
| 0.4329317    | 0          | 0.4254430   | 0.4128992  | 0.06499079 | 0.0500040  | 0.1283784  |
| 0.5137701    | 0.9576659  | 0.06161695  | 0.1721512  | 0.04078084 | 0.1719324  | 0          |
| 0.1178545    | 0.3335307  | 0.08878663  | 0          | 0.7926820  | 0.7394034  | 0.0580484  |
| 0.05262965   | 5.8334     | 0.2014678   | 0.0473479  | 0.5663695  | 0.2969513  |            |
| 0.08510115   | 0          | 0.1470131   | 0.4048798  | 0          | 1.3098990  | 0.1277723  |
| 3.02213      | 0.1095001  | 0.3297789   | 0.1338386  | 0.1405097  | 0          | 0.0302303  |
| 0.4991345    | 0          | 0.02215305  |            |            |            |            |
| TCGA-DK-AA76 | 366        | 0           | 1.0361150  | 0.1146209  | 0.3887144  | 0.4626707  |
| 80.465870    | 0.06491855 | 0.3260131   | 0.1229671  | 0.4942677  | 0.03915181 |            |
| 0.2394255    | 1.3576210  | 0.2509953   | 0.09183715 | 0.04228918 | 0.6284623  |            |
| 0.1945562    | 0.08514696 | 0.02931854  | 0          | 2.68046746 | 0.616140   | 0.0740198  |
| 0.2304584    | 0          | 0.2565187   | 0          | 0.9822310  | 0.1340276  | 0.07676127 |
| 0.4543717    | 0.4853544  | 0.09523015  | 0.2063643  | 0.2358924  | 0.07252562 |            |
| 0.02492413   | 0.1556916  | 0.1388773   | 0.3691252  | 0          | 11.805840  | 0.4533552  |
| 0.1009212    | 0          | 0.2158911   | 0.6519064  | 6.04495    | 0.2376287  | 0.7342383  |
| 0.03158506   | 0.1904603  | 0.4109198   | 2.6568010  | 0.02069804 | 1.40729    | 0          |
| 0.1994584    | 0          | 0.002577192 | 0.1429258  | 0.4284350  | 0.7462552  | 0.2885105  |
| 0.007920957  | 0.5265371  | 0.1797883   | 0.3923266  | 3.2939864  | 0.7153350  | 0.2701997  |
| 0.08337209   | 0.01491388 | 0.1421961   | 0          | 0          | 0.5029187  | 0.3395606  |
| 0.6131123    | 0.1093041  | 0.06930566  | 0.1491534  | 0.2271858  | 0.04614066 |            |

|              |            |            |            |            |             |            |
|--------------|------------|------------|------------|------------|-------------|------------|
| 0.2598074    | 0.0885707  | 0          | 0.1968479  | 0.1396429  | 0.007290609 | 0.4921134  |
| 0.04605676   | 0          | 0.7424336  | 2.9028210  | 0.02099388 | 0.03665878  | 0          |
| 0.4734807    | 0.4887052  | 0.1855767  | 0.2851133  | 0.5596241  | 0.04040067  |            |
| 1.4957480    | 0.0705605  | 0.0525544  | 0.13522    | 1.60162    | 0           | 0.4182041  |
| 0.0189747    |            |            |            |            |             |            |
| 0.1203383    | 0.3678808  | 0.09577021 | 0.05240386 | 0.3692598  | 0           | 0.08457836 |
| 0.3953693    | 2.2072230  | 0.2450943  | 0.1120024  | 0.1151419  | 0.3254066   |            |
| 0.03769527   | 0.13522    | 0.2249491  | 0          | 1.0607010  | 0.2768439   | 0.1325251  |
| 0.04690967   | 0.2210403  | 0.2459342  | 0.4673657  | 0.6922818  | 0.4514475   |            |
| 0.03903116   | 0          | 0          | 0.6481336  | 0.1959862  | 0.3567777   | 0          |
| 0.4846297    |            |            |            |            |             |            |
| 0.06579538   | 0.6332805  | 1.1456330  | 0.09161381 | 0.1415152  | 0.4536935   |            |
| 2.0167460    | 0.4254598  | 0.2023260  | 0.2699597  | 0.6579538  | 0.6473766   | 0.111416   |
| 0.8155885    | 1.7109270  | 0.2520519  | 0.1459172  | 0          | 0.6856203   | 0          |
| 0.09095591   |            |            |            |            |             |            |
| 0.0269768    | 0.06600969 | 0.04551881 | 0.1084849  | 0.1030772  | 0.7301682   |            |
| 0.2521415    | 0.6904591  | 1.0573830  | 0.2479402  | 0.4221870  | 0.3897111   | 0.3638236  |
| 0.03867362   | 0          | 1.9832270  | 0.06148354 | 0.6429560  | 0.5362691   | 0.6791704  |
| 0.09864182   | 0.2512431  | 0.1391825  | 0.2771935  | 0.6178346  | 0.2659657   |            |
| 0.4262945    | 0.06348677 | 0.2002002  | 0          | 0.6446210  | 0.05076397  | 0.2190019  |
| 0.08716119   | 0.6846276  | 0.2753393  | 1.0612350  | 0.3502012  | 1.1590440   | 0.07040361 |
| 0.1852858    | 0.3504245  | 0          | 0.3094564  | 0          | 0.01493366  | 0.7420597  |
| 0.1095009    | 0.05616678 | 0          | 0          | 0.5264682  | 1.9500410   | 0.2486161  |
| 0.04580691   | 0.1931224  | 0.1963660  | 0.1012314  | 0.2017276  | 0.09972921  |            |
| 0.01310461   | 0.3895398  | 6.3847130  | 0.2282092  | 0.1477901  | 0           | 0.2262979  |
| 0.09572999   | 1.1194981  | 0.1674230  | 0.1274527  | 0          | 0.5152112   | 0.04547795 |
| 0.4392697    | 0.5350320  | 0.03587991 | 0.9400257  | 2.9118080  | 0.1464232   | 0.02849406 |
| 0            | 0.7102211  | 0          | 0          | 0.6455978  | 0           | 0.2488332  |
| TCGA-DK-A3IL | 413        | 1          | 0.2497640  | 0.2199589  | 0.2131279   | 0.4348755  |
| 0.4509362    |            |            |            |            |             |            |
| 32.907810    | 0.2047494  | 0.1388172  | 0.3485615  | 0          | 0.01451795  | 1.440208   |
| 0.7876467    | 1.6339810  | 0.3255196  | 0.1953362  | 0.03478006 | 0.1516148   |            |
| 0.2240135    | 0.1225486  | 0.07233769 | 0          | 3.0610772  | 7.930680    | 0.08116852 |
| 0.06317894   | 0.2705617  | 0.1054848  | 3.3482024  | 0.7406280  | 0.04867583  | 0.1469718  |
| 0.03156554   | 0.7162404  | 0.4167825  | 0.2506256  | 0.3818723  | 0.3357795   |            |
| 0.1518301    | 0.1298235  | 0.07815796 | 0.3654957  | 0.4933193  | 0.06797147  |            |
| 9.8150590    | 0.4194615  | 0.2490030  | 0.04560695 | 1.2428930  | 0.8042249   | 3.850165   |
| 0.2736075    | 1.3586910  | 0.1818364  | 0          | 0.5886948  | 0.8664825   | 0.3051005  |
| 3.95446      | 0.1041663  | 0.3463962  | 0.4921241  | 0.1262621  | 0.1589678   |            |
| 0.2860311    | 0.2202247  | 0.3750668  | 0.1423685  | 0.01954339 | 0.3070661   |            |
| 0.5681089    | 0.3871952  | 0.9157474  | 6.0425460  | 0.1666660  | 0.1371361   | 0.4722286  |
| 0.7350948    | 0.0645492  | 0          | 0.6095414  | 0.2792661  | 0.5573227   | 0          |
| 0.2564970    | 0.1891144  | 0          | 0.1138429  | 0.4807674  | 0           | 0.04413825 |
| 0.1448529    |            |            |            |            |             |            |
| 0.02296941   | 0.3177903  | 0.7160620  | 0.5303010  | 0.5296590  | 0.8953396   | 1.599093   |
| 0.06215789   | 0          | 0          | 3.65558    | 9.5404621  | 0.4402410   | 0.2670930  |
| 0.3246741    |            |            |            |            |             | 0.5414751  |
| 0.4984032    | 1.7063430  | 0.1450784  | 0.08644504 | 0.1112095  | 4.38373     | 0.5354341  |
| 0.2948102    | 0.0468163  | 0.3958813  | 0.6483378  | 0.4725880  | 0.2088631   | 0.396982   |
| 0.2403837    | 0.2086803  | 0.3554131  | 1.2305020  | 0.1304302  | 0.5373352   |            |

|              |            |             |             |            |            |            |              |
|--------------|------------|-------------|-------------|------------|------------|------------|--------------|
| 0.3314381    | 0.3045393  | 0.06200373  | 4.96736     | 0.4343613  | 0.05787015 |            |              |
| 2.2268050    | 0.5692146  | 0.1829527   | 0.1929005   | 0.3272239  | 0.4045292  |            |              |
| 0.3075019    | 1.7210080  | 0.03210055  | 0.1459422   | 0.1344081  | 0.8439911  |            |              |
| 0.8865215    | 0.08383603 | 0.09968064  | 0.3730261   | 0.3246741  | 0.801279   |            |              |
| 0.05234486   | 0.1506926  | 0.03879563  | 0.3109441   | 1.3342030  | 0.5652433  |            |              |
| 0.2995196    | 0.9251001  | 1.48809     | 1.7260861   | 1.4268460  | 0.4340261  | 1.289864   |              |
| 0.3109441    | 0.3360202  | 0.1022491   | 0.6645697   | 0.2150926  | 0.1122078  |            |              |
| 0.04437328   | 0.1764380  | 0.2058992   | 0           | 0.3920806  | 1.2472240  | 0.2295879  |              |
| 0.2484374    | 1.2855370  | 0.4267098   | 1.2365940   | 0.1831495  | 0.2618183  | 0.09541949 |              |
| 0.2125842    | 0.4819080  | 0.3033969   | 1.36561     | 0.01948854 | 0.7533392  | 0.6491521  |              |
| 0.7463627    | 0.0850833  | 0.1144684   | 1.0521850   | 0.03175801 | 0.2319962  |            |              |
| 0.4108583    | 0.1044273  | 0.1491549   | 0.07335653  | 4.5554340  | 0.06875661 |            |              |
| 0.5010001    | 0.5403438  | 0.4032243   | 0.0375374   | 1.0416630  | 0.5692146  |            |              |
| 0.1782964    | 0.3888205  | 0.09264371  | 0.06530801  | 1.7200080  | 0.5453732  |            |              |
| 0.05482435   | 0.4175862  | 0.2635365   | 0.2101337   | 0.04619347 | 0.1906934  |            |              |
| 0.03953179   | 1.4987950  | 0.8960296   | 0           | 0.3862217  | 0          | 0.3706043  | 0            |
| 0.1472994    | 0.1659076  | 0           | 0           | 0.8970382  | 2.0918640  | 0.2413118  | 0.1580118    |
| 0.4444428    | 0.4652876  | 0.1574632   | 0.3023744   | 0.9296478  | 0          | 0.07631229 |              |
| 0.4834836    | 0.03740261 | 0.1806352   | 0.5867047   | 0.08852658 | 3.458646   |            |              |
| 4.5041520    | 0.2456638  | 0.09373793  | 0.06181975  | 0.1298022  | 0.04517184 | 0          |              |
| 1.4671310    | 0.01542062 | 0.06139466  |             |            |            |            |              |
| TCGA-E7-A678 | 798        | 0           | 0.07956366  | 0.02127098 | 0          | 0.2207853  | 0 106.65960  |
| 0.3469644    | 0.6534050  | 0.2751738   | 0.1149296   | 0.6931364  | 0.8848727  |            |              |
| 0.04299591   | 0.1339920  | 0.09417468  | 0.009330241 | 0          | 0.1303607  | 0.09793513 | 0            |
| 2.126074141  | 0.70240    | 0.07326057  | 0.04276773  | 0          | 0          | 0          | 2.7054080 0  |
| 0.08547066   | 0.2529625  | 0.1430532   | 0.06362102  | 0.2872232  | 0.1515329  |            |              |
| 0.07341311   | 0.02775203 | 0.04727903  | 0.01546344  | 0.1027516  | 0          | 22.890030  |              |
| 0.2247436    | 0          | 0.5609012   | 0.20739213  | 0.1058361  | 0.3065795  |            |              |
| 0.1055062    | 0          | 1.4169080   | 0.01418244  | 1.6322520  | 0          | 1.3325350  | 0            |
| 0.0742664    | 0.1788921  | 0.4154629   | 0           | 0.01763935 | 0.2878094  | 0.0316085  |              |
| 0.1892974    | 0.5165809  | 3.4798770   | 0.1128213   | 0.04641577 | 0.01660602 | 0          | 0            |
| 0.08996912   | 0.7662887  | 0           | 0.2515124   | 0          | 0          | 0.1176375  | 0 0.05137581 |
| 0.07232133   | 0          | 0           | 0.0692155   | 0          | 0          | 0.3161244  | 0 0.07967604 |
| 0.1970303    | 0.8842748  | 0           | 0           | 0          | 0.04804995 | 1.0544040  | 0.6801926 0  |
| 0.08954069   | 0.4765031  | 0.08996912  | 0.2148977   | 0          | 0.05851726 | 0          |              |
| 2.2826760    | 0.6652198  | 0.007042526 | 0.0669960   | 0.1755518  | 0.2132727  |            |              |
| 0.03590747   | 0.3289250  | 0.1084820   | 0.03071359  | 1.8308720  | 0.03210622 | 0.1454954  |              |
| 0            | 0.9807829  | 0           | 0.1505622   | 0.0653405  | 0          | 1.4763110  | 0.07706371   |
| 0.1686417    | 0          | 0           | 0           | 0.6765113  | 2.2248920  | 0          | 0 0 0.661532 |
| 3.6006790    | 0.04498456 | 0.2490536   | 0           | 0.0542410  | 0.1530126  | 0          |              |
| 0.5893649    | 0.7995208  | 0.1822049   | 0.09011284  | 0          | 0.9157571  | 0.3255354  |              |
| 0.1417798    | 0.1602575  | 0.6879346   | 0.07016248  | 0          | 0          | 0.8997346  |              |
| 0.1664031    | 0          | 0           | 0.0551244   | 0.05068341 | 0          | 0.1291190  | 0.06253951   |
| 0.3609639    | 0.04804995 | 0.2047573   | 0.1073612   | 0.9814131  | 0          | 0.3544654  |              |

|            |              |            |            |            |            |             |
|------------|--------------|------------|------------|------------|------------|-------------|
| 0.04306155 | 0            | 0.3011244  | 0.06845951 | 0.6603019  | 0          | 0.4821422   |
| 0.2180121  | 0.02196676   | 0          | 0          | 0.0949674  | 0.1289877  | 0.1346102   |
| 0.2224979  | 0.07069002   | 0.1101463  | 0.04965725 | 0.1063348  | 0.4654343  |             |
| 0.2826184  | 0.08128334   | 0.7885358  | 0          | 0.9197386  | 0.2055032  | 0.1671151   |
| 0.4245231  | 0.04703499   | 0.2652538  | 0.3694295  | 0          | 0.04922394 | 0           |
| 0.01247103 | 0.1408388    | 0          | 0.3752370  | 0.05352053 | 0.05636554 | 0.2149796   |
| 0.07706371 | 0.1230330    | 0.05100419 | 0.03583903 | 0          | 0.0780350  | 0.03208796  |
| 0.1110446  | 0            | 0          | 0.4045845  | 0          | 0.01645584 | 0           |
| 0.01574836 | 0.07106106   | 0.1655890  | 0.6602562  | 0.07095677 | 0          | 0.2647696   |
| 0          | 0.2037956    | 0.6666583  | 0          | 2.4789833  | 0.6957530  | 0.05217169  |
| 0          | 0            | 0.08786703 | 0          | 0          | 1.248525   | 0.006959121 |
| 0.1662396  | TCGA-ZF-A9R1 | 773        | 0          | 0.04784047 | 0.3410648  | 0.2313309   |
| 0.3097616  | 0.5383951    | 101.18710  | 0.0555592  | 0.2202149  | 0.2910244  | 0.1097699   |
| 0.01575791 | 1.66171      | 0.9831563  | 0.7389737  | 0.1464993  | 0.3703276  |             |
| 0.2642540  | 0.3141677    | 0.06947034 | 0.04750545 | 0.05234397 | 0          | 2.533331    |
| 36.002040  | 0.1174680    | 0.2400124  | 0.07341752 | 0.1144942  | 2.22088    | 2.561223    |
| 0.3169990  | 0.2791679    | 0.1027845  | 1.8590330  | 0.6371540  | 0.4420507  | 0.4605417   |
| 0.3644580  | 0.2471965    | 0.04449839 | 0.1570319  | 0.2107534  | 0.2471322  |             |
| 0.07377682 | 10.447160    | 0.4046997  | 0.2102101  | 0.01980087 | 1.2205660  | 0.9560473   |
| 2.5696130  | 0.3818262    | 0.5735079  | 0.1409763  | 0          | 0.7454702  | 1.104051    |
| 0.1691326  | 0.1046879    | 0.05653149 | 0.1074233  | 0.2848831  | 0.4111381  |             |
| 0.2553666  | 0.2041385    | 0.09561351 | 0.5551374  | 0.05150933 | 0.02121257 |             |
| 0.1880110  | 0.4899255    | 0.5370054  | 1.40811    | 3.3282610  | 0.1206005  | 0.1116365   |
| 0.2329823  | 0.3989391    | 0.0525467  | 0.1081942  | 0.4489439  | 0.3031179  |             |
| 0.8353698  | 0.2439331    | 0.03093378 | 0.1331458  | 0.2028036  | 0.2471322  |             |
| 0.8117342  | 0            | 0.04790804 | 0.1294791  | 0.07479359 | 0.1204009  | 0.5012506   |
| 0.5344795  | 0.5110191    | 1.0164510  | 0.2933526  | 0.02248891 | 0          | 0           |
| 0.8981639  | 1.1997040    | 0.4141501  | 0.08483802 | 0.5289496  | 0.2163885  |             |
| 0.7752890  | 0.3464325    | 0.0469141  | 0.2011797  | 1.9101180  | 0.1584995  | 0.5866475   |
| 0.01129218 | 0.1074233    | 0.1407423  | 0.3419674  | 0.4713956  | 0.3296297  | 0           |
| 0.1132517  | 0.2790665    | 2.15547    | 0.14157    | 1.0998020  | 0.1541768  | 0.8113490   |
| 3.0981670  | 0.2531912    | 0.06281277 | 0.9717811  | 1.4827930  | 0.1901283  | 0.04187518  |
| 0.1183906  | 0.1097699    | 1.9608710  | 0.9410211  | 0.04477742 | 0.06968443 |             |
| 0.03960174 | 0.09725848   | 0.4821449  | 0.6998095  | 0.04549818 | 0.144259   |             |
| 0.3993394  | 0.4111381    | 0.2609146  | 0.05681557 | 0.1635631  | 0          | 0.4050017   |
| 1.7646930  | 0.3612236    | 0.1204934  | 1.2480980  | 0.2842886  | 0.9874806  |             |
| 0.2997882  | 1.2727540    | 0.1125005  | 0.1563083  | 0.1387276  | 0.2295140  |             |
| 0.04059712 | 0.07224472   | 0.05892533 | 0.1015840  | 0.04842098 | 0.2415384  |             |
| 0.9526371  | 0.4260461    | 0.50079    | 0.5745487  | 0.1311588  | 0.7537532  |             |
| 0.3478861  | 0.1623885    | 0.1035691  | 0.1538272  | 0.3218875  | 0.1097699  |             |
| 1.0698910  | 0.04230607   | 0.6809053  | 0.5188881  | 0.7572754  | 0.2374718  |             |
| 0.1242450  | 0.1713075    | 0.1723521  | 0.1151134  | 0.3686513  | 0.05667317 |             |
| 0.1093310  | 0.3196880    | 0.1492581  | 0.04531582 | 0.1954979  | 0.3909791  |             |
| 0.4889210  | 0.7373673    | 1.1532840  | 0.1488650  | 0.3403461  | 0.1131258  | 0.02362863  |

|              |            |            |            |            |            |             |
|--------------|------------|------------|------------|------------|------------|-------------|
| 2.8186710    | 0.1183906  | 0          | 0.3032787  | 0.2785173  | 0.1954979  | 0.05013879  |
| 0.05174507   | 0.0858163  | 0.9399321  | 0.0981290  | 0          | 0          | 0.1723959   |
| 0.1737826    | 0.1800776  | 0          | 0          | 0.3278628  | 1.71448    | 0.05820488  |
| 0.1206005    | 0.2398880  | 0.02848532 | 0.3798267  | 0.4466277  | 0.3413222  |             |
| 0.05522001   | 0.4304353  | 0          | 0.09803149 | 0.2558629  | 0          | 2.1640964   |
| 0.1359370    | 0          | 0.3522211  | 0.03922393 | 0          | 0.2729891  | 0.005579224 |
| 0.02221277   |            |            |            |            |            |             |
| TCGA-XF-A9SH | 1971       | 1          | 0.1292512  | 0.08293133 | 0.09374847 | 0.2869327   |
| 51.216590    | 0.3945508  | 0.1887035  | 0.17794    | 0          | 0.5150436  | 0.2771694   |
| 0.81457      | 0.08381627 | 0.01374759 | 0.1835842  | 0          | 0.3378401  | 0.06160613  |
| 0.2121276    | 0.1062483  | 1.91602489 | 0.564560   | 0.07140711 | 0.1111619  | 0.1190119   |
| 0.1855982    | 0          | 1.2343230  | 0.08564404 | 0.1939452  | 0          | 0.3835419   |
| 0.02756064   | 0.5972407  | 0.0919017  | 0.12403    | 0          | 0.09362874 | 0.1406741   |
| 0.06676803   | 0.1195943  | 9.6931350  | 0.08200369 | 0.09735896 | 0.08024442 |             |
| 0.6248122    | 0.2021451  | 12.298940  | 0.2063171  | 0.3945080  | 0.1371159  | 0           |
| 0.06220632   | 1.5273190  | 0          | 1.1545090  | 0.1110777  | 0          | 0.1792452   |
| 0.4799430    | 0.2504942  | 0.02292411 | 0.5402760  | 0.2327778  | 0.3217068  | 1.812642    |
| 5.0778390    | 0.0977484  | 0.08042929 | 0.04316238 | 0.4115310  | 0.2338478  |             |
| 0.1532107    | 0.1965450  | 0.09339019 | 0          | 0.2507226  | 0.4136801  | 0           |
| 0.1879777    | 0.1281666  | 0          | 0.08995252 | 0          | 0.03164972 | 0.28302     |
| 0            | 0.3228592  | 1.1095760  | 0.02430343 | 0          | 0          | 0.4371202   |
| 0            | 0.07405182 | 0.3572675  | 0.05846196 | 0.4189217  | 0.2042097  | 0           |
| 3.8009150    | 0.1712881  | 0.7780680  | 0.01830494 | 0.1741361  | 0.1520981  | 0.3464617   |
| 0.1924947    | 0.6412067  | 0          | 0.06119474 | 0.1397039  | 1.0503670  | 0.3511595   |
| 0            | 0.8930502  | 0          | 0.5217886  | 0.04245828 | 0          | 1.3531290   |
| 0.2054689    | 0.1357617  | 0.1279429  | 0.2669101  | 0.6086732  | 1.2977470  | 0           |
| 0.06419553   | 0.07882935 | 0.3907852  | 0.9926095  | 0          | 0          | 0.2697252   |
| 0            | 0.1325702  | 0          | 1.4224580  | 0.8081561  | 0.04735872 | 0.05855535  |
| 0.3570356    | 0.6950371  | 0.1266768  | 0.2082707  | 0.6877233  | 0          | 0.12669     |
| 0.1349288    | 0.3366154  | 0          | 0.1974272  | 0.0520492  | 0.0238799  | 0.1646705   |
| 0.07849176   | 0.1118687  | 0.6502111  | 0.3518317  | 0.06244574 | 0.06652568 |             |
| 0.1063060    | 0.9431863  | 0.08056187 | 0.1316181  | 0.05596282 | 0          | 0.3261179   |
| 0.2800210    | 0.4482545  | 0.4249930  | 0.3140282  | 0.4063345  | 0          | 0.1851295   |
| 0.1117550    | 0.05831316 | 0.3084357  | 0.0918688  | 0.03749067 | 0          | 0.3454821   |
| 0.1209757    | 0          | 0.4225435  | 0.1450460  | 0.1981386  | 0.9562343  | 0.8679844   |
| 0.2171829    | 0.5958474  | 0.04075114 | 0.07660533 | 0.9548271  | 0.06942358 |             |
| 0.2558859    | 0          | 0.01080491 | 0.3660684  | 0.1584538  | 0          | 0           |
| 0.3911426    | 0.3004561  | 0.03997345 | 0          | 0.2328821  | 0.1420762  | 0.1126826   |
| 0.08340307   | 0.1443136  | 0.07585235 | 0          | 0.6009123  | 0          | 0.04277205  |
| 0.3909936    | 0.2046658  | 0.05387141 | 0.1733552  | 0.7776253  | 0.04610774 | 0           |
| 0.3345366    | 0          | 0.2648530  | 0.4608455  | 0.1038404  | 1.1454896  | 0.3312320   |
| 0.1236974    | 0          | 0.4567682  | 0.1589577  | 0.04913626 | 0.6637844  | 0.4341158   |
| 0.07201503   |            |            |            |            |            |             |
| TCGA-FD-A5BU | 588        | 0          | 0.03319043 | 0.05323986 | 0.1203684  | 0.06140122  |

|              |             |            |            |            |            |             |            |
|--------------|-------------|------------|------------|------------|------------|-------------|------------|
| 0.6876239    | 11.372580   | 0.1156365  | 0.06030758 | 0.1211429  | 0.1142331  |             |            |
| 0.01639862   | 1.1572580   | 0.3383689  | 0.08071195 | 0.3647919  | 0.03928551 |             |            |
| 0.2335298    | 0.2530325   | 0.02966221 | 0          | 0          | 0.8062763  | 15.320760   | 0.03056106 |
| 0.3032936    | 0.4584159   | 0          | 3.466771   | 0.3841962  | 0.4948322  | 0           | 0.07130915 |
| 0.1406997    | 0.2320712   | 0          | 0.3354870  | 0.1011405  | 0.2572475  | 0.2006666   |            |
| 0.1164579    | 0.03870398  | 0.08572684 | 0          | 0.2622616  | 0          | 0           | 0.03090896 |
| 0.1337046    | 0.1297722   | 1.9633470  | 0.04415013 | 0.3836742  | 0.1173667  |             |            |
| 0.08846623   | 0.1600818   | 0.2978736  | 0.1005768  | 0.3268336  | 0          | 0           |            |
| 0.0370583    | 0.4635094   | 0.2944794  | 0.1106452  | 0.1990023  | 0.07702788 |             |            |
| 0.5896405    | 0.03679177  | 0.1067212  | 0.2637133  | 0.07289216 | 0.08619787 |             |            |
| 0.5093510    | 0.07745042  | 0.4294922  | 0.0188709  | 0.1458220  | 0.03753113 |             |            |
| 0.02458936   | 0           | 0.1798626  | 0          | 0.06438309 | 0.1039196  | 0.1055247   |            |
| 0.1714537    | 0.06033851  | 0.2468393  | 0          | 0.07699638 | 0.02594489 | 0.1185236   |            |
| 0.2637462    | 0.2139274   | 0          | 2.669464   | 2.060642   | 0.06630935 | 0.1021651   | 0          |
| 2.966558     | 1.20959     | 0.2648298  | 0.3016925  | 0.1154529  | 0.1529046  | 0.03753113  |            |
| 0.1942325    | 0           | 0.09764323 | 0.08374384 | 1.2259980  | 0.05550004 | 0           | 0          |
| 0.1464648    | 0.3113878   | 1.6701590  | 0.09050776 | 0          | 0.01281235 | 0.633025    |            |
| 0.02678659   | 0.7109895   | 0          | 0.4065332  | 0.1050537  | 4.9408860  | 0.009085721 | 0          |
| 0.7390221    | 0           | 0.08793729 | 0          | 0.2464086  | 0.1142331  | 0.08683401  |            |
| 1.0085150    | 0.1450356   | 0          | 0          | 0.1505246  | 0.1365494  | 0           | 0.07506226 |
| 0.4271203    | 0           | 0.3167772  | 0.05912567 | 0.1702135  | 0.04382126 | 0.2809793   |            |
| 0.3252895    | 0.03040312  | 0          | 0.08359509 | 0.1528053  | 0.1115491  | 0.9167359   |            |
| 0.1337046    | 0.08830026  | 0          | 0.09488717 | 0.02887364 | 0.2502196  | 0.17354     |            |
| 0.1689912    | 0.1837786   | 0          | 0.5285718  | 0          | 0.1795424  | 0.4695968   |            |
| 0.3597145    | 0           | 0          | 0.02132682 | 0.2958704  | 0.4654685  | 0           | 0.2155605  |
| 1.2006130    | 0.6853986   | 0.1913644  | 0          | 0.2258826  | 0.2330466  | 1.282898    |            |
| 0.1372930    | 0.2154947   | 0.1980810  | 0.1434879  | 0.02246136 | 0.01856325 | 0.05897749  |            |
| 0.05470018   | 0           | 0.04435819 | 0          | 0.09431671 | 0.2034468  | 0.5020164   |            |
| 0.2544002    | 0.3069394   | 0.4286342  | 0.0929507  | 2.734304   | 0.05232244 | 0           |            |
| 0.7480377    | 0           | 0.1232043  | 0          | 0.7179260  | 0.2115062  | 0.06781561  | 0.2087097  |
| 0            | 0.1339584   | 0.1504845  | 0.3202855  | 0.3214757  | 0          | 0.08510676  | 0          |
| 0.03616972   | 0           | 0          | 0.6817346  | 0          | 0          | 0.03028574  | 0.0137293  |
| 0.1182513    | 0.04940587  | 0.1036146  | 0.08607176 | 0.02960002 | 0.08619787 |             |            |
| 0.1104501    | 0.7182124   | 0.03400581 | 0.5443665  | 0.1333259  | 0.1838439  |             |            |
| 3.2515950    | 0.02176372  | 0.4235234  | 0.06982795 | 0          | 0          | 0           | 0.1104790  |
| 0            |             |            |            |            |            |             | 0.1161215  |
| TCGA-C4-A0F7 | 62          | 1          | 0.04433833 | 0.09482919 | 0.09647839 | 0.04101223  |            |
| 0.04082581   | 126.164     | 0          | 0.6251727  | 0.09709923 | 0.1831216  | 0.03505045  |            |
| 0.7491253    | 0.1901603   | 0.3123041  | 0.0527126  | 0.05973563 | 0.06297671 |             |            |
| 0.3078074    | 0.7533021   | 0.1003835  | 0          | 0.1822371  | 1.897675   | 182.87      | 0.1592207  |
| 0.2859973    | 0.04082581  | 0          | 0.3929484  | 0.1411407  | 0.1762759  | 0.08870794  |            |
| 0.3429368    | 0.3947105   | 0.1877826  | 0.06618079 | 0.05121935 | 0.06755561 |             |            |
| 0.05563872   | 0.2433213   | 0.2418916  | 0          | 0.0229041  | 2.010255   | 1.5670160   |            |
| 0.1001940    | 0.005505407 | 0.2500581  | 0.2311461  | 7.276127   | 0.2123249  | 1.890708    |            |

|              |             |              |             |             |             |             |             |              |   |   |   |
|--------------|-------------|--------------|-------------|-------------|-------------|-------------|-------------|--------------|---|---|---|
| 0.3292536    | 0.1890880   | 0.1644996    | 2.1146740   | 0.03240404  | 1.07697     | 0           | 0           |              |   |   |   |
| 0.3564383    | 0.01905205  | 0.01407242   | 0.2506829   | 0.1329212   | 0.5144988   |             |             |              |   |   |   |
| 0.8306518    | 0.007863884 | 0.1853362    | 0.1456126   | 0.2531748   | 0.9211978   |             |             |              |   |   |   |
| 0.2721721    | 0.0502974   | 0            | 0.05182246  | 0.1008368   | 0.04870004  | 0.04010957  |             |              |   |   |   |
| 0.09197539   | 0.1348456   | 0.1121280    | 0.3268299   | 0.05244454  | 0.05638722  |             |             |              |   |   |   |
| 0.0458082    | 0.3224192   | 0.04396626   | 0           | 0.005142883 | 0.2911371   | 0.2406661   |             |              |   |   |   |
| 0.09082345   | 0.04572491  | 0.3196869    | 0.8134659   | 2.7459660   | 0.03639465  |             |             |              |   |   |   |
| 0.08200663   | 0.2142138   | 2.1446910    | 0.20216     | 0.06908984  | 0.1306426   | 0.3676711   |             |              |   |   |   |
| 0.04010957   | 0.9181271   | 0.08756511   | 0.02608786  | 0           | 2.2515530   | 0.1175173   |             |              |   |   |   |
| 0.05931297   | 0.006279326 | 0.02986781   | 0.6000209   | 0.07131011  | 0.1640829   |             |             |              |   |   |   |
| 0.07331983   | 0           | 0.02099224   | 0.06389869  | 1.5809860   | 0.1502910   | 0.7969006   |             |              |   |   |   |
| 0.02857807   | 0.2924267   | 0.03742366   | 0.2461172   | 0.4078168   | 0           | 1.579588    |             |              |   |   |   |
| 0.2748492    | 0.09632817  | 0.04657167   | 0.1316686   | 0.03052027  | 0.997596    |             |             |              |   |   |   |
| 0.7419648    | 0           | 0.03874992   | 0.02202163  | 0.02704161  | 0.4021647   | 0.09728704  |             |              |   |   |   |
| 0.2277045    | 0.3008218   | 0.5736642    | 0.0653213   | 0.1450887   | 0.3475323   |             |             |              |   |   |   |
| 0.04547685   | 0           | 0.6756367    | 0.5038541   | 0.01624593  | 0.1807814   | 0.08933819  |             |              |   |   |   |
| 0.4490839    | 0.1347622   | 0.1185141    | 0.3095957   | 0.4482414   | 0           | 0.1231359   |             |              |   |   |   |
| 0.0308573    | 0.1823250   | 0.07418496   | 0.09030054  | 0.1249847   | 0.08191759  |             |             |              |   |   |   |
| 0.1581679    | 0.0269258   | 0.04477134   | 0.2230483   | 0.2235043   | 0.171371    |             |             |              |   |   |   |
| 0.1369258    | 0.07977202  | 0.3713478    | 0.05527187  | 0.2483265   | 0.1151849   |             |             |              |   |   |   |
| 0.1283097    | 0.1118714   | 0.1220811    | 0.8583280   | 0.3158055   | 0.3189147   |             |             |              |   |   |   |
| 0.08813797   | 0.1760702   | 0.2072695    | 1.0161090   | 0.2108504   | 0.05601047  |             |             |              |   |   |   |
| 0.2083050    | 0.03151466  | 0.1426379    | 0           | 0.04740566  | 0.08299901  | 0.0503982   |             |              |   |   |   |
| 0.1087120    | 0.5073007   | 0.4984427    | 0.2460199   | 0.1832328   | 0.09933654  |             |             |              |   |   |   |
| 0.3028140    | 0.02795853  | 0.1576721    | 0.6809950   | 0.1097238   | 0           | 0.1130487   |             |              |   |   |   |
| 0.2218511    | 0.1630679   | 0.1394052    | 0.05754851  | 0.07158074  | 0.4523148   |             |             |              |   |   |   |
| 0.9009062    | 0.0687123   | 0.1508374    | 0.04547685  | 0.1437982   | 0.04873779  |             |             |              |   |   |   |
| 0.06571287   | 0.1573582   | 0            | 0           | 0           | 1.2110540   | 0.04854961  | 0.00733626  |              |   |   |   |
| 0.1005948    | 0.1474379   | 0.005280013  | 0.2235167   | 0.1379775   | 0.03163359  |             |             |              |   |   |   |
| 0.06141319   | 0.1606631   | 0.1580259    | 0.05451308  | 2.0867670   | 0.05343208  |             |             |              |   |   |   |
| 0.8104562    | 2.0145920   | 0.05523992   | 0.2828875   | 0.1119378   | 0.07834486  |             |             |              |   |   |   |
| 0.07634037   | 0.05056709  | 0.05903451   | 0.006204959 | 0.06176007  |             |             |             |              |   |   |   |
| TCGA-C4-A0F0 | 59          | 0            | 0           | 0           | 0           | 0.018758693 | 0.155611883 | 49.526787666 | 0 |   |   |
| 0.058958639  | 0.037010394 | 0.977182195  | 0           | 0.763676742 | 0           | 0.187954745 |             |              |   |   |   |
| 0.032877755  | 0.079091846 | 0            | 0.009512761 | 0.353389567 | 0           | 0.033283653 |             |              |   |   |   |
| 0.083353844  | 0.586598523 | 23.862591601 | 0.289438103 | 0.130813083 | 0           |             |             |              |   |   |   |
| 0.072802724  | 0           | 0.850974699  | 0           | 0           | 0.130713982 | 0           | 0.105337275 | 0.021621862  |   |   |   |
| 0            | 0.102998123 | 0.052394464  | 0.056589851 | 0.075749003 | 0           | 0           | 0.328384229 | 0            |   |   |   |
| 0            | 0           | 0.025181328  | 0           | 0           | 3.319447174 | 0.053953238 | 0.312576913 | 0.197211868  |   |   |   |
| 0            | 0.406300917 | 0            | 0.025304781 | 0.266269223 | 0.07189269  | 0           | 0           | 0.043571327  |   |   |   |
| 0.03803459   | 0           | 0            | 0.235327954 | 0.32752934  | 0.017984413 | 0.445593393 | 0           |              |   |   |   |
| 0.029692386  | 0.158005912 | 0            | 0           | 0           | 0.008465433 | 0           | 0.378675672 | 0.09172911   |   |   |   |
| 0.030049191  | 0           | 0            | 0           | 0           | 0.105828297 | 0           | 0           | 0.147472185  | 0 | 0 | 0 |
| 0.031705707  | 0.012414913 | 0.02148723   | 0           | 0           | 0.209618777 | 0.466330963 |             |              |   |   |   |

|              |             |             |             |             |             |             |             |             |             |
|--------------|-------------|-------------|-------------|-------------|-------------|-------------|-------------|-------------|-------------|
| 0.038133036  | 0           | 0           | 0.146969724 | 0.13437886  | 0           | 0           | 0.082993004 | 0           | 0           |
| 0.054775383  | 0.080103276 | 0           | 0           | 0.421828632 | 0           | 0.067823293 | 0.007180294 |             |             |
| 0.204919782  | 0           | 0           | 0.581182154 | 0           | 0           | 0           | 0.00521907  | 1.362177286 |             |
| 0.016367146  | 0.635749654 | 0           | 0.235661531 | 0           | 0           | 0.011103118 | 0           | 0.697141237 |             |
| 0.078571246  | 0.032238874 | 0           | 0           | 0           | 0.053057336 | 0.107169227 | 0           | 0           | 0           |
| 0            | 0           | 0           | 0.18345822  | 0.543118679 | 0           | 0.221208277 | 0           | 0.104003892 | 0           |
| 0.343368072  | 0.130828342 | 0.037153845 | 0.045937821 | 0           | 0.18673426  | 0.302269348 |             |             |             |
| 0.099380407  | 0           | 0.215812953 | 0           | 0           | 0.176423779 | 0.083394131 | 0.127243699 |             |             |
| 0.464656525  | 0.040833619 | 0           | 0.284211893 | 0           | 0           | 0           | 0.265795939 | 0           | 0           |
| 0.010424896  | 0.092493519 | 0.25280946  | 0.103257006 | 0.482943262 | 0.097813184 | 0           |             |             |             |
| 0.418792369  | 0.092124689 | 0           | 0.166378875 | 0.159761534 | 0.156775337 | 0.100666544 |             |             |             |
| 0            | 0.290475516 | 0.131511018 | 0           | 0.0831785   | 0.072072872 | 0.016042999 | 0           |             |             |
| 0.027103747  | 0.189815683 | 0           | 0           | 1.083492413 | 0.36270186  | 0.125030765 |             |             |             |
| 0.209523323  | 0           | 0.121191771 | 0           | 0           | 0.181980025 | 0           | 0           | 0           | 0.313636496 |
| 0.076583425  | 0           | 0           | 0.065805666 | 0.054567507 | 0.011493636 | 0.109592515 | 0           | 0           |             |
| 0            | 0.073080244 | 0.111461535 | 0.026520513 | 0.098147017 | 0           | 0           | 0.050539677 |             |             |
| 0.353570607  | 0.037010394 | 0           | 0.996911969 | 0.080282178 | 0.042263181 | 0.22041464  |             |             |             |
| 0.021036632  | 0           | 0           | 0.037492928 | 0.309771017 | 0           | 0.433850783 | 0.081464805 |             |             |
| 0.112332328  | 0.993395122 | 0.006649035 | 0.388172005 | 0           | 0           | 0.012470545 | 0           | 0           |             |
| 0.007095257  | 0.028248601 |             |             |             |             |             |             |             |             |
| TCGA-FD-A3N5 | 685         | 1           | 0.04954273  | 0.09536415  | 0.07186863  | 0.2108006   |             |             |             |
| 0.1368537    | 16.299120   | 0.1656368   | 0.09041388  | 0.4774380   | 0.03916465  |             |             |             |             |
| 0.8094183    | 0.2390413   | 0.25713     | 0.08031813  | 0.1387642   | 0.04691258  |             |             |             |             |
| 0.009295612  | 0.2374094   | 0.01180699  | 0.01626194  | 0.1221767   | 0.6000773   |             |             |             |             |
| 21.785540    | 0.06842687  | 0.2023927   | 0.09123583  | 0.07114085  | 1.3799420   | 0.6308306   |             |             |             |
| 0.4595898    | 0.1734607   | 0.04257672  | 0.6930650   | 0.1227275   | 0.09507734  |             |             |             |             |
| 0.08584715   | 0.1459381   | 0.05851251  | 0.2810985   | 0.1289740   | 0.08473327  |             |             |             |             |
| 0.02559256   | 0.06876175  | 1.3950670   | 0.1257299   | 0.3918415   | 0.04306139  |             |             |             |             |
| 0.1197470    | 0.6198669   | 0.8865481   | 0.1581649   | 1.1454060   | 0.04379775  | 1.901547    |             |             |             |
| 0.1617514    | 0           | 0.06535031  | 0.2601911   | 0.03512579  | 0.1001210   | 0.2212648   |             |             |             |
| 0.04257672   | 0.06146746  | 0.06342065  | 0.1188188   | 0.1379737   | 0.3840633   |             |             |             |             |
| 0.03514776   | 0.1274405   | 0.0839765   | 0.1305657   | 1.3638590   | 0.03041194  |             |             |             |             |
| 0.05620127   | 0.02312175  | 0.08685801  | 0.03380189  | 0.06529969  | 0.1792704   |             |             |             |             |
| 0.1761795    | 0.1130052   | 0.1252895   | 0.1970379   | 0.05766204  | 0.06549461  |             |             |             |             |
| 0.06300591   | 0.02559256  | 0.3962910   | 0           | 0.0229862   | 0.1084368   | 0.0101096   |             |             |             |
| 0.2134668    | 0.1532762   | 0.07938032  | 0.3456570   | 0.7594766   | 0.06753841  | 0           |             |             |             |
| 0.09163251   | 0.1914864   | 0.6237290   | 0.1581225   | 0.2573318   | 0.1581421   |             |             |             |             |
| 0.3012739    | 0.0448176   | 0.5174085   | 0.1565495   | 0           | 0.1000023   | 0.9594299   |             |             |             |
| 0.03282784   | 0.1988252   | 0.007016388 | 0           | 0.1457502   | 0.2390413   | 0.5097824   |             |             |             |
| 0.2867412    | 0.2161587   | 0           | 0.09179881  | 1.4461150   | 0.007996766 | 0.8179625   |             |             |             |
| 0.2554603    | 0.6348316   | 0.1254493   | 0.2750062   | 0.2386927   | 0.03902866  |             |             |             |             |
| 0.7121924    | 0.1151665   | 0.1076351   | 0           | 0.1226031   | 0           | 0.2073848   |             |             |             |
| 0.2967148    | 0           | 0.3896852   | 0.09842604  | 0           | 0.2097062   | 0.2989429   |             |             |             |
| 0.02827026   | 0.0448176   | 0.5376133   | 0.03649433  | 0.1080794   | 0.1412092   | 0           |             |             |             |



|              |            |            |            |            |            |            |
|--------------|------------|------------|------------|------------|------------|------------|
| 0.07849339   | 0.2935887  | 0.4916996  | 0          | 0.04488919 | 0.1746931  | 0.5930329  |
| 0.1824340    | 0.2074662  | 0.2128836  | 1.0017110  | 0.1398042  | 0.16187    | 0.05171896 |
| 0.2648441    | 0.08289273 | 0.1008999  | 0.06483995 | 0          | 0.0504953  | 0          |
| 0.02143996   | 0.2492296  | 0.2896973  | 0.04787161 | 0.2039973  | 0.05602809 |            |
| 0.3779618    | 0.1235193  | 0          | 0.2359595  | 0.0477902  | 0.2000045  | 0.06820542 |
| 0.1765811    | 0.01314342 | 0.4138424  | 0.3427734  | 0.1860245  | 0.08197385 |            |
| 0.1286659    | 0.1537493  | 0.1927635  | 0.08493669 | 0.2179776  | 0.1760691  |            |
| 0.04703035   | 0          | 0.2383654  | 0.04637068 | 0          | 0.1214725  | 0.1389924  |
| 0.4303701    | 0.06108834 | 0.4094810  | 0.02774915 | 1.1673350  | 0.03124028 | 0.02936325 |
| 0.1550808    | 0.07983135 | 0.1716444  | 0          | 0.4949191  | 0.1122529  | 0.04049083 |
| 0.06230739   | 0          | 0.1599657  | 0.4155570  | 0.7220982  | 0          | 0.06128819 |
| 0.08926504   | 0          | 0.05183025 | 0.07992217 | 0          | 0.1235672  | 0.1790243  |
| 0.4894578    | 0.03616555 | 0.02459215 | 0.6744152  | 0.1255193  | 0.09439642 |            |
| 0.2039267    | 0.2158425  | 0.2651003  | 0.01715545 | 0.2308136  | 0.1513499  |            |
| 0.02030393   | 0.7101116  | 0.0199013  | 0.4665144  | 0.7531439  | 0.0454808  |            |
| 0.1264371    | 0.08338467 | 0.2188523  | 0.01218588 | 0          | 0.05654051 | 0          |
| 0.04830659   |            |            |            |            |            |            |
| TCGA-ZF-AA5H | 897        | 0          | 0.05103511 | 0.1091520  | 0.07403354 | 0.2454745  |
| 44.872540    | 0.4623003  | 0.2077189  | 0.1490199  | 0.4215599  | 0.0201722  |            |
| 0.5084149    | 0.1368011  | 0.3027149  | 0.05515837 | 0.2732225  | 0.02416287 |            |
| 0.1005441    | 0.2223281  | 0.04256928 | 0.0335036  | 0.2936664  | 1.17403    |            |
| 48.722190    | 0.09868334 | 0.5157370  | 0.2349603  | 0          | 0.3876845  | 0.4282991  |
| 0.5072508    | 0.07657966 | 0.06578889 | 0.6490384  | 0.09379876 | 0.09794136 |            |
| 0.2947771    | 0.1503342  | 0.07157667 | 0.07595176 | 0.07162839 | 0.06348051 |            |
| 0.1581809    | 0          | 0.7918663  | 0.06475864 | 0.03844238 | 0.03168467 | 0.6578889  |
| 1.1174442    | 0.1381390  | 0.1629293  | 0.5244042  | 0.1985151  | 0          | 0.1666239  |
| 0.8113567    | 0.03638858 | 0.1675180  | 0          | 0.1595510  | 0.1001324  | 0.08166385 |
| 0.06119897   | 0.1421299  | 0.3296938  | 0.06336141 | 0.05469976 | 0.1405725  |            |
| 0.1195544    | 0.2915918  | 1.12781    | 0.0771923  | 0.3810920  | 0.04686757 | 0.0464268  |
| 0.1009001    | 0.04616764 | 0.1663627  | 0.1552124  | 0.4793789  | 0          | 1.069182   |
| 0.06746751   | 0.2596154  | 0.1054540  | 0.4082285  | 0.05060684 | 0          | 0.09471448 |
| 0.01595761   | 0.01249695 | 0.5659647  | 0.07894667 | 0.2044288  | 0.1802326  |            |
| 0.3129418    | 0.1295495  | 0          | 0          | 0.2712251  | 1.2850350  | 0.7911590  |
| 0.1461975    | 0.1504723  | 0.1154191  | 1.2038320  | 0.2015816  | 0          | 0.02575366 |
| 2.1596860    | 0.1690836  | 0.2389502  | 0.08673292 | 0          | 0.2101969  | 0.2736022  |
| 0.4606479    | 0.2531817  | 0          | 0.09665146 | 0.09719085 | 0.8294787  | 0.1070895  |
| 0.7892728    | 0.1315778  | 1.67656    | 0.1507662  | 0.4120585  | 0.1844121  | 0          |
| 0.4864391    | 0.6722690  | 0.09194711 | 0.02680288 | 0.1768148  | 0.07025998 |            |
| 0.2136318    | 0.6472646  | 0          | 0.02230132 | 0.1774341  | 0          | 0.4320465  |
| 0.7278771    | 0          | 0.1846706  | 0.5147573  | 0.07518731 | 0.2505039  | 0          |
| 0.2355552    | 0          | 1.1233210  | 0.6154111  | 0          | 0.1618449  | 0.1542475  |
| 0.06860919   | 0.2319043  | 0.3015324  | 0.3530136  | 0.07200774 | 0.1083849  | 0          |
| 0.1888768    | 0.1067371  | 0.07795452 | 0.1644138  | 0.06600319 | 0.3641146  | 0          |
| 0.1030670    | 0.09627643 | 0.2315357  | 0.4438229  | 0.0525356  | 0.1101848  |            |

|              |            |             |            |             |            |            |
|--------------|------------|-------------|------------|-------------|------------|------------|
| 0.5332363    | 0.5089602  | 0.05196968  | 0.1546792  | 0.3446085   | 0.4378122  |            |
| 0.2459099    | 1.0628680  | 0.2569270   | 0.1643133  | 0.1803558   | 0.06755452 | 0          |
| 0.5482408    | 0.1103167  | 0.06447018  | 0.1712622  | 0.07254916  | 0.05248431 | 0          |
| 0.05456572   | 0.2388376  | 0           | 0.08342107 | 0.2278418   | 0.4172557  | 0.5034281  |
| 0.3954524    | 0.1429252  | 0.4531156   | 0.08045334 | 0.03024777  | 0.1831826  |            |
| 0.05482408   | 0.1262963  | 0.1142649   | 0.5588905  | 0.2987219   | 0.06256581 |            |
| 0.03209214   | 0.1656013  | 0.05492811  | 0.1561895  | 0.7911286   | 0.07909047 |            |
| 2.41489      | 0          | 0.1103448   | 0.05609906 | 0.04894224  | 0.08232967 | 0          |
| 0            | 2.194761   | 0.1117649   | 0.1435534  | 0.7333269   | 0.08081271 | 0.1367437  |
| 0.1581423    | 0.4235130  | 0.03641146  | 0.01767223 | 0.2792811   | 0.9094694  | 0          |
| 2.0780490    | 0.1845071  | 0.5936423   | 0.0516020  | 0.03346487  | 0.4395793  | 0.04294824 |
| 0.1352669    | 0.06904125 | 0           | 0.3397548  | 0.003571072 | 0.1066323  |            |
| TCGA-DK-A3WX | 321        | 1           | 0.2229678  | 0.3506436   | 0.09513114 | 0.3882195  |
| 0.02012786   | 24.692490  | 0.04569567  | 0.1620545  | 0.4308449   | 0          | 0.1684849  |
| 0.6768186    | 0.7031432  | 1.4586780   | 0.2055434  | 0.05812645  | 0.1862919  |            |
| 0.01845664   | 0.3142543  | 0.007814344 | 0.04305125 | 0.05390765  | 1.950211   |            |
| 15.811750    | 0.1207671  | 0.4653060   | 0.3623014  | 0.2825034   | 0.0830274  | 0.7780854  |
| 0.08690719   | 0.4920142  | 0.0281792   | 0.3907920  | 0.1624520   | 0.3216219  | 0.1893904  |
| 0.3264       | 0.1500631  | 0.2988878   | 0.1514216  | 0.1019635   | 0.4403931  |            |
| 0.06067908   | 3.9193640  | 0.3328526   | 0.1234936  | 0.008142793 | 0.8453699  |            |
| 0.5470041    | 1.4070960  | 0.4187198   | 1.8530750  | 0.5681476   | 0          | 0.2919645  |
| 0.1345254    | 0.1905403  | 0.4305125   | 0.04649535 | 0           | 0.2635957  | 0.028179   |
| 0.02081387   | 0.1713953  | 0.6291125   | 0.3043885  | 0.9743899   | 0.02907776 |            |
| 0.1757194    | 0.2501057  | 0.4416698   | 1.1581261  | 0.2479270   | 0.07439255 | 0.0510097  |
| 0.04927384   | 0.1342287  | 0.01440599  | 0.2669589  | 0.1943379   | 0.5484706  |            |
| 0.2369190    | 0.1003136  | 0.3561887   | 0.2509562  | 0.08339972  | 0.2032583  |            |
| 0.4768753    | 0.1300569  | 0           | 0.1673452  | 0.1025256   | 0.01605826 | 0.8337895  |
| 0            | 0          | 0.2146482   | 2.5534740  | 0.1202267   | 0          | 0.2830151  |
| 0.2093038    | 0.06812505 | 0.0966137   | 0.2175221  | 0.1483105   | 1.133601   |            |
| 0.2072216    | 0.0771707  | 0.1985566   | 1.4581240  | 0.1303608   | 0.1754541  | 0          |
| 0.0883522    | 0          | 0.1406286   | 1.04178    | 0.3795538   | 0          | 0.1552432  |
| 2.0773360    | 0.3175550  | 0.9319627   | 0          | 0.5890440   | 0.3044338  | 0.2316494  |
| 0.05166149   | 0.5123454  | 0.3557021   | 0.05559982 | 0.1722050   | 0.2596599  |            |
| 0.2257056    | 0.6176503  | 0.5544787   | 0          | 0.1432830   | 0.0399960  | 0.1586195  |
| 0.4316783    | 0.1122624  | 0           | 0.6796965  | 0.0966137   | 0.1072970  | 0.186916   |
| 0.3026822    | 0          | 0.6106851   | 1.4709290  | 0.2673854   | 0          | 1.6303560  |
| 0.4732797    | 0.4579087  | 0.6280797   | 0.2775842  | 0.2571171   | 0.09127921 |            |
| 0.5752928    | 0          | 0.6677967   | 0.2244717  | 0.0242321   | 1.3033740  | 0.2787729  |
| 0.1986576    | 0.4536131  | 0.3504093   | 0.1901002  | 1.1138630   | 0.1719241  |            |
| 0.1522655    | 0.4905003  | 0.1001695   | 0.1135764  | 0.3162949   | 0.3971133  |            |
| 0.3611289    | 0.7745405  | 0.1217839   | 0.8608211  | 0.3009844   | 0.1593298  |            |
| 0.3797753    | 0.2725002  | 1.1428150   | 0.08505246 | 0.1538503   | 0.2053962  | 0          |
| 0.1175893    | 0          | 0.3155198   | 0          | 0.1118125   | 0.3215816  | 0.3647635  |
| 0.2010610    | 0.2830151  | 0.7791570   | 0.2081424  | 1.7691190   | 0.1033804  | 0.1554703  |

|              |            |            |             |                |            |            |
|--------------|------------|------------|-------------|----------------|------------|------------|
| 0.1532738    | 0          | 0.2596599  | 0           | 0.1206069      | 0.3219385  | 0.1875893  |
| 0.08247511   | 0.1276760  | 0.2155661  | 0.0510050   | 0.1622520      | 0.06726271 | 0.2126852  |
| 0.07208581   | 0.1029101  | 0.1269497  | 0           | 0              | 0.4003993  | 2.8202090  |
| 0.1302087    | 0.1983801  | 0.2076844  | 0.1718073   | 0.1122197      | 0.7074639  |            |
| 0.4210899    | 0          | 0.5431529  | 1.3689830   | 0.02687592     | 0.4162017  | 0.1053719  |
| 0.4358939    | 1.2406140  | 0.1935066  | 0.1464420   | 0.05518735     | 0.7531956  | 0.08065108 |
| 0            | 0.3243136  | 0.0137662  | 0.03653858  |                |            |            |
| TCGA-YF-AA3L | 364        | 0          | 0.3063202   | 0.03448139     | 0          | 0.08947616 |
| 74.0567      | 0.05616992 | 0.1054590  | 0.5001798   | 0              | 0          | 0.2569752  |
| 1.6137290    | 0.06098632 | 0.1028881  | 0.1144966   | 0.1361233      | 0.03511699 |            |
| 0.05763317   | 0.1058387  | 0          | 2.1859281   | 0.040301261817 | 0.01733219 |            |
| 0.1484491    | 0          | 0.3061762  | 1.9595280   | 0.1602418      | 0          | 0          |
| 0.08374051   | 0.03437768 | 0.9777685  | 0.09006903  | 0.2380131      | 0.04498752 |            |
| 0.05474415   | 0.01253353 | 0.3331316  | 0.07458779  | 14.128980      | 0.1214404  |            |
| 0.02001853   | 1.3638760  | 0.04202419 | 9.1266890   | 0.04289148     | 0.6212271  | 0.05701037 |
| 0            | 1.10059    | 0          | 0.02155358  | 1.9580160      | 0.2172082  | 0.9360474  |
| 0.01860711   | 0.1289890  | 0.1933290  | 0.1496639   | 0.2083021      | 0.02859432 | 0.08639894 |
| 0.008539843  | 0.1770353  | 0.1256108  | 0.8412115   | 0.3352970      | 0.1254041  |            |
| 0.06056827   | 0.09166463 | 0          | 0.03646118  | 0.4777672      | 0.06128997 | 0.6698174  |
| 0            | 0.03127381 | 0.1570443  | 0           | 0              | 0.05861836 | 0          |
| 0            | 0.01644924 | 0.08540906 | 0.08313149  | 0.1291591      | 0.3610571  | 0.3593120  |
| 0            | 0.1557838  | 0.17233    | 1.6906970   | 0.06597737     | 0.3862184  | 0          |
| 0            | 0          | 13.725950  | 2.5880560   | 0              | 0.04742979 | 0.3889422  |
| 0.06665061   | 0          | 0          | 0.01659612  | 0.7353004      | 0          | 0.3200899  |
| 0            | 0.2033911  | 0.1412272  | 0.06350322  | 1.6248430      | 0.3417214  | 0          |
| 0.1196919    | 0          | 0.3796133  | 1.0223620   | 0.07045041     | 0          | 0          |
| 2.2109440    | 0.04599831 | 0          | 0.1682204   | 0              | 0.04396377 | 0          |
| 0.3412113    | 0.5160262  | 0.2362910  | 0           | 0.1484491      | 0.1601977  | 0.294473   |
| 0.04329765   | 0.3860233  | 0          | 0           | 0.1122020      | 0.8287032  | 0.1348741  |
| 0.04057714   | 0.1042528  | 0          | 0           | 0.04651304     | 0.1013799  | 0.9833630  |
| 0.04143766   | 1.8917270  | 0.1004886  | 0.3693904   | 0.03490253     | 0.4665543  | 0          |
| 0.2219530    | 0.3211153  | 0          | 0.1352731   | 0.3147551      | 0.4985299  | 0.0400137  |
| 0.08374051   | 1.92434    | 0.1045480  | 0.007273674 | 0.1743291      | 0.05729614 | 0.1126584  |
| 0            | 0.2585616  | 0.5281456  | 0           | 0              | 0.1533910  | 0.6460762  |
| 0.1053510    | 0.2202159  | 0.02541541 | 0.02388836  | 0.9622209      | 0.04329765 |            |
| 0.03989731   | 0          | 0.02695494 | 0.3424608   | 0              | 0          | 0          |
| 0.3460040    | 0.1249244  | 0          | 0           | 0.05809697     | 0.08860914 | 0.02811086 |
| 0.1800091    | 0          | 0          | 0.5621596   | 0.02942234     | 0          | 0          |
| 0.07829164   | 0.2006832  | 0.6901482  | 0           | 0.1967192      | 0          | 0.06607271 |
| 0.6840528    | 0.03238124 | 1.5627758  | 0.5916560   | 0.02114327     | 0.1285779  | 0          |
| 0.1784479    | 0.06128997 | 0.3679865  | 0           | 0              |            |            |
| TCGA-BT-A2LA | 522        | 0          | 0.07963676  | 0.09580735     | 0.1805066  | 0.1933646  |
| 0.2444263    | 27.066990  | 0.2080926  | 1.2444320   | 0.4723372      | 0.2055672  | 0.05902    |
| 4.23647      | 0.4269373  | 0.4981982  | 0.4088364   | 0.2999943      | 0.1413918  |            |

|              |            |            |            |             |             |            |
|--------------|------------|------------|------------|-------------|-------------|------------|
| 0.1167352    | 0.1734638  | 0.3617868  | 0.04901256 | 0.2454894   | 3.9777491   | 3.647      |
| 0.2016517    | 0.2568421  | 0.7791087  | 0.07147147 | 0           | 1.20991     | 0.2968237  |
| 0.09958107   | 0          | 0.5696885  | 0.2107996  | 0.2971709   | 2.4723890   | 0.171895   |
| 0.09552473   | 0.1435173  | 0.2377391  | 0.04643295 | 0.3342496   | 1.059247    |            |
| 0.1001108    | 0.09473568 | 0.3936626  | 0.01236043 | 0.7218213   | 0.05189565  |            |
| 8.4254690    | 1.8155960  | 0.8800259  | 0          | 0.5392151   | 2.0165170   | 0.01419547 |
| 3.1041290    | 0.1058671  | 0.4694029  | 0.9780899  | 0           | 1.4964360   | 0.1486693  |
| 0.02984274   | 0.6237670  | 0.2893862  | 0.1412444  | 0.2720697   | 0.04218339  |            |
| 0.5538394    | 0.6721722  | 0.3971927  | 0.2634915  | 0.5807302   | 0.2243872   |            |
| 0.07923762   | 0.02186772 | 0.04502589 | 1.1652390  | 0.1513739   | 0.4135786   |            |
| 0.3654528    | 0.7337803  | 0.2043232  | 0          | 0.07713451  | 0.5429083   | 0          |
| 0.04041281   | 1.0115930  | 0.07109607 | 0.1582074  | 0.02566476  | 0.1196239   |            |
| 0.2700938    | 0.8240468  | 0.03041654 | 0.7558289  | 0           | 0.1202352   | 0.4617258  |
| 1.4297170    | 0.2068222  | 0.1833197  | 0.6695516  | 0.1575906   | 2.5632170   | 0          |
| 0.02511675   | 4.4410280  | 0.03298041 | 0.6658309  | 0.03524498  | 0           | 1.69856    |
| 1.5209640    | 0.8805413  | 0.2057670  | 0          | 0.1485854   | 4.0613350   | 0.04016965 |
| 1.3938780    | 0.06416189 | 1.1942780  | 0.02100538 | 0.3767513   | 0.6213051   | 0.07842009 |
| 4.4018950    | 0.1424221  | 0.07842009 | 0.1970767  | 0.06852241  | 0.3125229   |            |
| 2.6477740    | 0.2515654  | 1.5442350  | 0.2719296  | 0.03035616  | 0.1504863   | 0.3822411  |
| 0.1420082    | 0.1350777  | 1.3675910  | 0.1833197  | 1.9001790   | 0.3191973   | 1.352853   |
| 0.02628606   | 0.9691318  | 1.6993080  | 0.2029402  | 1.4291121   | 0.0082580   | 0.01745542 |
| 0.1463447    | 0.2673412  | 1.19175    | 0.1755674  | 0.04878669  | 0.08659887  |            |
| 1.7738330    | 0.2290144  | 0.6588977  | 0.2304999  | 0.009195841 | 0.10146     | 0          |
| 0.05025906   | 1.43973    | 0.5620153  | 0.2404705  | 0.07685453  | 0.1483969   |            |
| 2.5878630    | 0.8066066  | 0.7349244  | 0.02155056 | 0           | 0.5023351   | 0.06852241 |
| 1.9062       | 0.01320451 | 1.1674850  | 0.4125579  | 0.3847715   | 0.2141225   | 0.4394972  |
| 0.5228006    | 0.1721417  | 0.1167693  | 0.2895130  | 0.07075497  | 0.3950535   | 0          |
| 0.5321627    | 0.09317238 | 0.02828781 | 0.08135802 | 8.3710160   | 0.5849715   |            |
| 0.6137224    | 0.4113841  | 0.3159519  | 1.2407470  | 0.1255419   | 0.4424958   |            |
| 0.1537241    | 0          | 0.1970767  | 0.1485854  | 0.03744747  | 0.5403781   | 0.2033950  |
| 0.3230118    | 0.1339243  | 0.06205906 | 1.3218020  | 0.03856726  | 0.1077528   | 0          |
| 0.07174392   | 0.1094234  | 0.08678522 | 0.4496442  | 2.0006380   | 0.6884154   |            |
| 0.2892544    | 0.05450045 | 0.02470645 | 0.07528329 | 0.1655097   | 0.005927195 |            |
| 0.1427215    | 0.3510834  | 2.4502580  | 0.08617592 | 0.2870973   | 2.9396970   | 0.04079658 |
| 4.4117960    | 0.1199627  | 4.4938394  | 0.7416360  | 0.1501314   | 0.06351233  | 0.0418861  |
| 0.2638433    | 1.4997080  | 0.7100410  | 0.0243793  | 0.3258516   |             |            |
| TCGA-4Z-AA87 | 1454       | 0          | 0.02597753 | 0.1250095   | 0.3768403   | 0.1441728  |
| 0.1594638    | 77.457720  | 0.04525325 | 0.2265678  | 0.2133367   | 0           | 0.05133957 |
| 0.2743172    | 0.2089006  | 1.9260730  | 0.1123053  | 0.07828659  | 0.1537402   |            |
| 1.6754780    | 0.01547737 | 0.02131721 | 0.2135429  | 10.0793156  | 0.623780    | 0.2690952  |
| 0.01396366   | 0.2391957  | 0          | 0          | 0.8081399   | 0.04303288  | 0          |
| 0.9756544    | 0.08308904 | 0.2625794  | 0.1649183  | 0.05752651  | 0.01208139  |            |
| 0.1102614    | 0.05048813 | 0.0670968  | 0          | 17.932890   | 0.2060187   | 0.2690555  |
| 0.0887035    | 1.2034540  | 0.1354277  | 0.7164230  | 0.1727774   | 0.8341518   | 0.02296518 |
|              |            |            |            |             |             | 0          |

|                            |                     |                    |                    |                    |                  |             |           |   |
|----------------------------|---------------------|--------------------|--------------------|--------------------|------------------|-------------|-----------|---|
| 0.7517580.03330574         | 0.03588688          | 4.1355390.09209036 | 0.1749936          | 0.4930822          |                  |             |           |   |
| 0                          | 0.0187385           | 0.1454879          | 0.1168165          | 1.23591            | 0.0419546        | 0.01151849  |           |   |
| 0.2018609                  | 0.06880116          | 0.1616454          | 0.4722582          | 7.2556040.3192466  |                  |             |           |   |
| 0.05051583                 | 0.005421864         | 0.02953981         | 0.04279955         | 0.1468746          | 2.059283         |             |           |   |
| 0.4444039                  | 0.2111626           | 0                  | 0.1511743          | 0.1039293          | 0.2477767        | 0.0335484   |           |   |
| 0.6139357                  | 0                   | 0                  | 0.07532954         | 0                  | 0.01060185       | 0.3027628   | 0.0334874 | 0 |
| 0.08670618                 | 1.9712310.006105775 | 0                  | 0                  | 0.06275322         | 0.6885261.450941 |             |           |   |
| 0.1686637                  | 0.1169401           | 0.3350916          | 0.05874983         | 1.3798940.05130382 | 0                |             |           |   |
| 0.09831711                 | 2.06819             | 0.08606575         | 0.8253381          | 0                  | 0.04374839       | 0.7260236   |           |   |
| 0.06963354                 | 0.09085936          | 0.2147880          | 0.03074803         | 0.1437345          | 2.358806         |             |           |   |
| 0.08386145                 | 0.0678632           | 0.1255778          | 1.3461710.3288941  | 0.4915855          |                  |             |           |   |
| 0.7111225                  | 0                   | 1.1974280.6038712  | 0.1204470.06821508 | 0.06428646         |                  |             |           |   |
| 0.04470406                 | 0.1699084           | 0.7092673          | 0.2553             | 0                  | 0.06451163       | 0           | 0.1178128 |   |
| 0.7124979                  | 0.03705849          | 0.08812474         | 0.8041248          | 0.04783915         | 0.4250324        | 0           |           |   |
| 0.2664459                  | 0                   | 0.3848552          | 0.9152637          | 0.4521232          | 0.05884368       | 0.3271416   |           |   |
| 1.2557780.7326232          | 0.2546011           | 0.1395308          | 0.4492213          | 0.0916322          |                  |             |           |   |
| 0.05304744                 | 0.04519772          | 0.3649787          | 0.1629918          | 0.09919967         | 0.06538187       |             |           |   |
| 0.02399749                 | 0.2316739           | 0.1183174          | 0.1217879          | 0.2450298          | 0.2618993        |             |           |   |
| 0.1882597                  | 0.06685325          | 0.1702595          | 2.4395870.1214378  | 0                  | 0.05623839       |             |           |   |
| 0.5011720.2949513          | 0.1788162           | 0.9304349          | 0                  | 0.7410822          | 0.2446845        |             |           |   |
| 0.08606575                 | 0.0644740.37106     | 0.4495994          | 0.3649923          | 0.07618038         | 0.3002683        |             |           |   |
| 0                          | 0.07363804          | 0                  | 0.9200356          | 0.1823571          | 0.07381993       | 0.05307802  |           |   |
| 0.08397056                 | 0.3318571           | 0.3603536          | 0.6038712          | 0.2182523          | 0.4546303        |             |           |   |
| 0.2866626                  | 0.0577369           | 0.08402652         | 0                  | 0                  | 0                | 0.05157603  | 0.1410172 |   |
| 0.1326950                  | 0                   | 0.0349489          | 0.4784871          | 1.0989880.0503226  | 0.1606811        | 0           |           |   |
| 0.1404173                  | 0                   | 0.1811799          | 0.2095344          | 0.1450242          | 0                | 0.9144297   |           |   |
| 1.3964520.2844490.05372833 | 0.2455743           | 0.1953899          | 0.03093524         | 0.15018            |                  |             |           |   |
| 0.4176739                  | 0.6486868           | 0                  | 0.6435519          | 0                  | 0.07984713       | 0.4214344   |           |   |
| 0.05217584                 | 0.9712655           | 0.4826654          | 0.1192384          | 0.06215322         | 0                | 0           | 0         | 0 |
| 0.2841151                  | 0                   | 0.1809241          |                    |                    |                  |             |           |   |
| TCGA-BT-A2LB               | 492                 | 1                  | 0.045420608        | 0.255002802        | 0.041180577      | 0.199563278 |           |   |
| 0.15683382                 | 26.288042523        | 0                  | 0.115542018        | 0.082891148        | 0.625305068      |             |           |   |
| 0.056103155                | 1.251115336         | 0.304378176        | 0.968201116        | 0.067499108        | 0.136880757      |             |           |   |
| 0.161284863                | 0.314255615         | 0.964612312        | 0.060888424        | 0.14908894         | 0                | 1.916796704 |           |   |
| 34.327328079               | 0.162061614         | 0.073244604        | 0.15683382         | 0.040763558        | 0.934468177      |             |           |   |
| 0.920091743                | 0.225723442         | 0.141989467        | 0.146378232        | 0.409158884        | 0.158792954      |             |           |   |
| 0.121064703                | 0.065586988         | 0.207613825        | 0.121537366        | 0.095057035        | 0.086111715      |             |           |   |
| 0.132414519                | 0.117315887         | 0.026266893        | 5.187751319        | 0.3241934          | 0.192449468      |             |           |   |
| 0.028198959                | 1.143579937         | 0.503175172        | 5.031751722        | 0.120837565        | 0.554221929      |             |           |   |
| 0.200768149                | 0                   | 0.522396411        | 0.145584137        | 0.11132474         | 0.857261404      | 0           | 0         |   |
| 0.152141154                | 0.073189116         | 0.103204919        | 0.136274638        | 0.034041449        | 0.447998844      |             |           |   |
| 0.440135003                | 0.010069797         | 0.066937891        | 0.042103563        | 0.241066887        | 0.26541108       |             |           |   |
| 6.133944956                | 0.021468807         | 0.114822201        | 0.066359281        | 0.116210465        | 0.037416589      |             |           |   |
| 0.025680392                | 0.117775589         | 0.043167843        | 0.266650792        | 0                  | 0.08810728       | 0.134311724 |           |   |

|                            |                    |                 |                   |             |             |
|----------------------------|--------------------|-----------------|-------------------|-------------|-------------|
| 0.072204509                | 0.029328972        | 0.247717008     | 0.05629932        | 0.102340713 | 0.046098666 |
| 0.071010388                | 0.03939089         | 0.272704651     | 0.204929525       | 0.045484761 | 0.63086017  |
| 1.253314159                | 0.373649059        | 0.652452901     | 0                 | 0.850340325 | 2.031510976 |
| 0.20643084                 | 0.176583264        | 0.449882415     | 0.102721566       | 0.439599389 | 0.089702538 |
| 0.033405821                | 0.028650544        | 1.376414432     | 0.188102868       | 0.075950969 | 0.040203759 |
| 0.038246094                | 0.133623282        | 0.152189088     | 0.597020064       | 0.046943456 | 0.061929252 |
| 0.053761621                | 0.16072383         | 0.725043055     | 0.073314083       | 0.996709553 | 0.109783674 |
| 0.952187967                | 0.071882167        | 1.575779899     | 0.186505083       | 0           | 0.789555312 |
| 0.051144861                | 0.059635576        | 0.0843016       | 0.156326267       | 0.534739666 | 1.120111688 |
| 0.031884367                | 0                  | 0.084596877     | 0                 | 0.446313159 | 0.872040531 |
| 0.051360783                | 0.35544383         | 0.20911176      | 0.495434016       | 0.080912591 | 0.553219719 |
| 0.059968736                | 0.961289881        | 0.493050038     | 0.020803108       | 0.180049902 | 0.257396891 |
| 0.83644704                 | 0.398226023        | 0.632328209     | 0.24396372        | 0.302093912 | 0.040053745 |
| 0.157677012                | 0.118539427        | 0.303510205     | 0.047497361       | 0.317985028 | 0.074306309 |
| 0.115386098                | 0.419538688        | 0.034478813     | 0.139230566       | 0.464126101 | 0.211787915 |
| 0.137151665                | 0.292225145        | 0.265587475     | 0.546136327       | 0.212328864 | 0.05781546  |
| 0.147495623                | 0.38337156         | 0.200553805     | 0.351734101       | 0.694376778 | 0.120498451 |
| 0.44673751                 | 0.167238898        | 0.401286119     | 0.225460054       | 0.05898024  | 0.04066062  |
| 0.049090261                | 0.046107047        | 0.160889037     | 0                 | 0.05838797  | 0           |
| 0.106281224                | 0.290409719        | 0.046402321     | 0.527717135       | 0.174071411 | 0.490048863 |
| 0.293289718                | 0.127201624        | 0.242348066     | 0.017900618       | 0.033650168 | 0.777237175 |
| 0.67090023                 | 0.028100533        | 0               | 0.598025732       | 0.2626427   | 0.046402321 |
| 0.073691558                | 0.122213325        | 0.231677777     | 0.413760769       | 0.175973831 | 0.087795014 |
| 0.087350482                | 0.163675787        | 0.124818647     | 0.103945194       | 0.091590475 | 0.443745034 |
| 0.594259606                | 0.758887145        | 0.020722787     | 0.046970845       | 1.37400367  | 0.026970864 |
| 0.104797348                | 0.076149145        | 0.318027322     | 2.025359184       | 0.05898024  | 0.222525448 |
| 0.02890773                 | 0.162877512        | 1.186263619     | 0.022806807       | 2.421530516 | 5.821128377 |
| 0.055843719                | 0.235456549        | 0.09555849      | 0.200643059       | 0.034912414 | 0           |
| 0.007945525                | 0.047450704        |                 |                   |             |             |
| TCGA-XF-A8HB               | 1370               | 0               | 0.08298539        | 0.1267758   | 0           |
| 68.523460.1239101          |                    | 0.04308168      | 0.1947159         | 0           | 0.1288607   |
| 0.1588891                  | 0.5273873          | 0.17938         | 0.08616443        | 0.08419267  | 0           |
| 0.09182189                 | 0.03891312         | 0.1949041.67435 | 56.806520.3493085 |             | 0.1401935   |
| 0.05457945                 | 0                  | 0               | 0.7547558         | 0           | 0           |
| 0.2275101                  | 0.1369488          | 0.09633507      | 0.04375448        | 0.03859406  | 0.05769877  |
| 0.0552976                  | 0.2755815          | 0               | 2.9124520         | 0.08929864  | 0           |
| 1.4523756.9775510.09461803 |                    | 0.2131762       | 0.04192137        | 0           | 0.4134443   |
| 0.01373577                 | 1.7121770.04202617 |                 | 0.03992986        | 0.5029904   | 0.1018816   |
| 0.001710293                | 0.08852608         | 0.2487807       | 0.2751304         | 0.07658528  | 0.005256557 |
| 0.05717847                 | 0.03767756         | 0.3992161       | 0.5541913         | 0.0363863   | 0.2241396   |
| 0.1198772                  | 0.004948622        | 0.01348073      | 0                 | 0.02681096  | 0.2283554   |
| 0.08565844                 | 0                  | 0.02299654      | 0.1278520.1507665 | 0.06124033  | 0.08620754  |
| 0.05877787                 | 0                  | 0.06187903      | 0.03706829        | 0           | 0.4480001   |
| 0.3324104                  | 0.1455120.4725105  |                 | 0.00278642        | 0           | 0           |
|                            |                    |                 |                   | 0.02863794  | 0.4713216   |

|              |             |            |            |             |             |            |
|--------------|-------------|------------|------------|-------------|-------------|------------|
| 0.3243177    | 0           | 0.1406937  | 0.3932274  | 0.02681096  | 0.3522194   | 0.04682582 |
| 0            | 0.1794712   | 2.4318640  | 0.0392768  | 0.1585893   | 0.008394741 | 0.03992986 |
| 0.6626534    | 0.2224448   | 0.01070049 | 0.1470303  | 0           | 0           | 0.07017074 |
| 2.5756390    | 0.1052448   | 0.4211908  | 0.2674393  | 0.6515686   | 0.05003116  |            |
| 0.1196475    | 0.1103390   | 0.9261967  | 0          | 0.2230088   | 0.0311305   | 0.05867529 |
| 0.1632084    | 0           | 0.3445624  | 0          | 0           | 0           | 0.07168644 |
| 0.03382388   | 0           | 0.2845039  | 0          | 0.3879339   | 0.04223736  | 0.1823921  |
| 0.5519856    | 0.3294440   | 0.02171895 | 0.1342689  | 0.05971748  | 0.3820561   |            |
| 0.3533940    | 0.02640664  | 0.1910281  | 0.6307869  | 0.04181709  | 0.06778415  | 0          |
| 1.2431140    | 0.2112626   | 0.1133826  | 0.04380578 | 0.1057262   | 0           | 0.1624613  |
| 0.1118213    | 0.4422235   | 0.1431897  | 0.1525451  | 0.05789359  | 0.4423808   |            |
| 0.07389217   | 0.2414430   | 0.07699452 | 0.4002493  | 0.2692068   | 0           | 0.3728295  |
| 0.2475704    | 0.2761140   | 0          | 0.09236522 | 0.1698027   | 0           | 0.08557668 |
| 0.1768127    | 0.0421315   | 0.1813124  | 0          | 0.2059718   | 0.1664403   | 0          |
| 0.04844516   | 0.03615155  | 0.4240479  | 0.1096335  | 0.6430234   | 0.0774676   |            |
| 0.4554311    | 0.1308208   | 0.1053948  | 0.08658814 | 0           | 0.2640388   | 0.04423808 |
| 0.02725352   | 0.1119206   | 0          | 0.07454754 | 0.07693579  | 0.09569527  | 0.2351584  |
| 1.0451630    | 0.05499608  | 0.06079736 | 0.08544076 | 0.1954706   | 0.06717987  |            |
| 0.4398644    | 0.1323659   | 0.0869657  | 0          | 0.8267444   | 0.06490529  | 0.04903871 |
| 0.3586234    | 0.1783355   | 0.02823509 | 0.0904673  | 0.6394619   | 0.866955    |            |
| 0.04105121   | 0.2016380   | 0.7243290  | 0.02429259 | 1.7795340   | 0.02381086  | 1.805812   |
| 1.8422430    | 0.06218902  | 0.1134565  | 0          | 0.1571072   | 0           | 0.02253414 |
| 0            | 0.02476985  |            |            |             |             |            |
| TCGA-DK-A2I6 | 2656        | 0          | 0.02816472 | 0.06023767  | 0           | 0.2692030  |
| 16.980440    | 0.2524672   | 0.1027994  | 0          | 0.009277021 | 0.4582786   | 0.1006618  |
| 0.4002458    | 0           | 0.1414633  | 0.1111229  | 0           | 0.1635948   | 0.03356099 |
| 0.1386721    | 0.07717406  | 2.88738615 | 0.343680   | 0.2204347   | 1.0193820   | 0.4754473  |
| 0.03370259   | 0           | 0.7742999  | 0.2177282  | 0           | 0.02017049  | 0.2785880  |
| 0.1401318    | 0.1084523   | 0.10013    | 0.03464999 | 0.06549291  | 0.04675535  |            |
| 0.0437912    | 0.02424868  | 0          | 2.1445710  | 0.1786916   | 0.07071726  | 0.0233144  |
| 0.3025574    | 0.04894311  | 2.4523070  | 0.09990638 | 0.3617534   | 0.3651815   |            |
| 0.2001883    | 0.2298866   | 0          | 0.02175523 | 1.6948820   | 0.0316212   | 0.1257876  |
| 0            | 0.002708826 | 0.1427147  | 0.08443462 | 0.2396690   | 0.1212986   | 0.02497659 |
| 0.0855302    | 0.02983756  | 0.2680374  | 0.3657287  | 0.4898548   | 0.03550007  |            |
| 0.007302537  | 0.007837813 | 0.09608077 | 0.01031179 | 0.0212321   | 0.06955342  |            |
| 0.03569041   | 0.8309729   | 0          | 0.03642278 | 0.07185367  | 0.05969742  | 0          |
| 0.06826936   | 0           | 0          | 0.01633439 | 0.04403261  | 0.01149448  | 0.3448325  |
| 0.02420459   | 0.0376060   | 0.2931384  | 0.7627717  | 0.1522566   | 0           | 0          |
| 0.5287685    | 0.1926250   | 0.04876383 | 0.01536799 | 0.5709075   | 0.0212321   |            |
| 0.3803578    | 0.05562336  | 0          | 0.0710633  | 1.3938760   | 0.03110403  | 0.2197822  |
| 0.01661988   | 0.0316212   | 0.3314321  | 0.05033091 | 0.1588860   | 0.03881203  | 0          |
| 0.0217446    | 1.7750030   | 0.1515371  | 0.5696420  | 0.6014961   | 0.0198103   | 0.1421266  |
| 0.2312987    | 0.03697924  | 0.9095058  | 0.03637302 | 0.0646722   | 0.1479169   | 0          |
| 0.06462391   | 0.02456185  | 0.4961189  | 0.1581686  | 0           | 0.0233144   | 0          |

|              |             |            |            |            |             |            |
|--------------|-------------|------------|------------|------------|-------------|------------|
| 0.3122341    | 1.3389770   | 0.0212321  | 0.5844842  | 0          | 0.1536061   | 0          |
| 0.1444397    | 0           | 0.3179110  | 0.1770344  | 0.03439929 | 0.04253203  | 0.07093708 |
| 0.3025574    | 0.1536483   | 0.1129243  | 0.2017049  | 0.4995319  | 0.0993472   |            |
| 0.01533701   | 0.01633439  | 0.3024111  | 0.07853997 | 0.0239004  | 0.3733367   |            |
| 0.008672654  | 0.1076484   | 0          | 0.1625130  | 0.2361423  | 0.4448551   | 0.1360735  |
| 0.09664265   | 0.08445502  | 0.2958339  | 0.4681327  | 0          | 0.1422713   | 0.1358421  |
| 0.02368777   | 0.09693586  | 0.4724011  | 0          | 0.3238418  | 0.1221923   | 0.08294408 |
| 0.09320321   | 0.09752765  | 0.2689399  | 0.04058697 | 0.02117805 | 0.1365208   |            |
| 0.03336472   | 0.1213043   | 0          | 0.08783004 | 0          | 0           | 0.1150939  |
| 0.1918922    | 0.2315222   | 0.1697408  | 0.07011205 | 0.4408121  | 0.02959983  |            |
| 0.01391068   | 0.06465244  | 0.2521311  | 0.2090972  | 0          | 0.1785468   | 0.9217727  |
| 0            | 0.1180712   | 0.03046344 | 0.02526096 | 0.2819999  | 0.5870615   | 0.03637302 |
| 0.0580699    | 0           | 0.1014932  | 0.2063957  | 0.03273907 | 0.1211606   | 0.05241151 |
| 0            | 0           | 0.4364762  | 0.01713324 | 0.0233008  | 1.1715020   | 0.1635263  |
|              |             |            |            |            |             | 0.06987468 |
| 0.1150626    | 0.07790797  | 0.06698126 | 0.01625461 | 0.1457956  | 0.0239004   |            |
| 0.0384755    | 0.5790965   | 0.01885627 | 0.3900154  | 1.0545360  | 0.03693648  |            |
| 0.08984831   | 0.03950304  | 0          | 0          | 0          | 0.2410719   | 0          |
|              |             |            |            |            |             | 0.05230854 |
| TCGA-ZF-AA4X | 2044        | 0          | 0.3711898  | 0.1428997  | 0.05384625  | 0.1098702  |
|              |             |            |            |            |             | 0          |
| 19.871190    | 0.2589919   | 0.2709637  | 0.2044066  | 0.6895697  | 0.1153718   |            |
| 0.4377934    | 1.5962420   | 0.3690848  | 0.09475432 | 0.1054452  | 0.1532205   | 0          |
| 0.01769234   | 0.07310376  | 0          | 5.15694324 | 0.3299601  | 0.1230422   | 0.1117340  |
|              |             |            |            |            |             | 0.06835676 |
| 0.2132039    | 0           | 4.4900630  | 0.09838263 | 0.2227924  | 0           | 1.1958860  |
|              |             |            |            |            |             | 0.4567904  |
| 0.2532798    | 0.9433512   | 0.3091723  | 0.2575566  | 0.01381035 | 0.1193188   |            |
| 0.1962259    | 0.6135922   | 0          | 15.742421  | 0.0833090  | 0.16776     | 0.08296189 |
|              |             |            |            |            |             | 1.196243   |
| 1.0449542    | 0.8646880   | 0.3555065  | 1.9070550  | 0.03937759 | 0           | 1.14579    |
|              |             |            |            |            |             | 0.2284327  |
| 0.006616557  | 1.4620750   | 0.1500277  | 0.3978687  | 0          | 0.01071008  | 0.2534227  |
| 0.6231593    | 0.6202453   | 0.04795873 | 0.01975036 | 0.3182749  | 0.3067245   |            |
| 0.4891196    | 1.8123311   | 0.1296301  | 0.1965029  | 0.2425296  | 0.006197787 | 0.135069   |
| 0.0163082    | 0.03357876  | 0.4399976  | 0.2257789  | 0.1877416  | 0           | 0.05760296 |
| 0.1962825    | 0.09441203  | 0.2300971  | 0.3239059  | 0.07361497 | 0           | 0.2583299  |
| 0.09285064   | 0.009089315 | 0.5820625  | 0          | 0.2973712  | 0.4667983   | 3.0727290  |
| 0.1828123    | 0           | 0.03586692 | 7.0835491  | 0.5908880  | 0.03856022  | 0.2248178  |
| 0.7797734    | 0.2014726   | 1.1496090  | 0.1172918  | 0.04368025 | 0.1498497   |            |
| 5.0158720    | 0.09838263  | 0.9931077  | 0.0210276  | 0.1000184  | 0.2620815   |            |
| 0.7561886    | 0.05695672  | 1.7800660  | 0.07029677 | 0.1566623  | 2.388569    |            |
| 0.1437943    | 0.4033905   | 5.7898180  | 0.6062026  | 0.06266037 | 0.03746242  |            |
| 0.7153443    | 0.1169661   | 1.1251940  | 0.4601942  | 0.4877955  | 0.1169660   | 0.2204595  |
| 0.1533050    | 0.9711201   | 1.5169260  | 0.0324405  | 0          | 0.1358315   | 0.8080381  |
| 2.3212210    | 0.1694477   | 0.1678938  | 0.4389453  | 0.4374833  | 0.04048824  | 0          |
| 0.2665048    | 0.03920649  | 0.4399319  | 0.9504641  | 0.9040980  | 0.1008972   | 0.1121877  |
| 1.7089190    | 0.3818511   | 0.03968687 | 0.9569947  | 1.3825250  | 0.3142371   | 0.194045   |
| 0.1033319    | 2.21834     | 0.06210585 | 0.1889936  | 0.1046341  | 0.1783065   |            |
| 0.1324144    | 0.1352498   | 0.3641058  | 0.3267787  | 0.6885735  | 0.5738707   |            |
| 1.5284130    | 0.1946253   | 1.7606460  | 0.1388168  | 0.1133961  | 0.09643     | 0.1432237  |



|              |            |            |            |             |            |            |
|--------------|------------|------------|------------|-------------|------------|------------|
| 0.7117861    | 0          | 0.5551418  | 0.0590848  | 0.9163491   | 0.5950010  | 0.06558842 |
| 0.1351183    | 0.03856022 | 0.4784973  | 0.2888490  | 0.4488101   | 0.3875287  |            |
| 0.2638331    | 0.2701475  | 0          | 0.7738939  | 0.4863933   | 0          | 0.2426961  |
| 0.05795477   | 0.4172842  | 1.0069253  | 2.597090   | 0.6514368   | 0.3042102  | 0.2340621  |
| 0.1759990    | 0.5019469  | 0          | 0.1469730  | 0.01861802  | 0.1822240  | 0.03033701 |
| 0.04668267   | 0.09635644 | 0.07990088 | 1.1528310  | 0.9674149   | 0          | 0.3214333  |
| 0.03807212   | 0.3210249  | 0.1632084  | 0.1294429  | 0.3592813   | 0.0828893  |            |
| 0.01089182   | 0          | 4.5300360  | 0.08128912 | 0.1596852   | 0.1122874  | 0.4231936  |
| 0.1237684    | 0.3193104  | 0.9240914  | 0.02648287 | 0.1285341   | 0.8179996  |            |
| 0.07559742   | 0.4259456  | 1.4505320  | 1.3569897  | 0.9375270   | 0.1752462  | 0          |
| 0.06247443   | 0.6558842  | 0.1095605  | 0          | 1.2002550   | 0.1662285  | 0.05170403 |
| TCGA-BT-A20P | 544        | 1          | 0.17858408 | 0.13641038  | 0.09252182 | 0.3775711  |
| 0            | 0          | 0          | 0          | 0           | 0          | 0          |
| 58.23970104  | 0          | 0.16688072 | 0.60526179 | 0.1756118   | 0.02520978 | 0.23382007 |
| 0.61547123   | 1.93884613 | 0.17922577 | 0.06331597 | 0.12078809  | 0          | 0.2778497  |
| 0.12160011   | 0.16748163 | 0          | 3.07280076 | 56.35131745 | 0.10570918 | 0.27426862 |
| 0            | 0          | 0          | 2.06720179 | 0.16904688  | 0.12760505 | 0.05481217 |
| 0.17328615   | 0.02720002 | 0.73678272 | 0.2073125  | 0.0753275   | 0.11864884 |            |
| 0.0808532    | 0.1586668  | 0.13178882 | 0          | 12.16863468 | 0.24279216 | 0.28825523 |
| 0            | 1.95268351 | 0.79800069 | 9.04400785 | 0.20361744  | 0.19660887 | 0.13532181 |
| 0            | 1.62801607 | 1.43919112 | 0.04092826 | 4.18704067  | 0          | 0.34371526 |
| 0.62667141   | 0          | 0.03312486 | 0.23133065 | 0           | 0.71049489 | 0.08240554 |
| 0.1131208    | 0.3144553  | 0.09459552 | 0.05602896 | 1.12635995  | 2.19248675 |            |
| 0.19293883   | 0.09922115 | 0.01064941 | 0.2901045  | 0.25219542  | 0.8654553  |            |
| 0.15120598   | 0.09698668 | 0.2765047  | 0.15609938 | 0.24744208  | 0.09762913 |            |
| 0.64889742   | 0.06589441 | 0          | 0          | 0.07664413  | 0.02959185 | 0.19942685 |
| 0.02082373   | 0.39644966 | 0          | 0          | 0.09339294  | 1.21238592 | 0          |
| 0.12325735   | 5.32497659 | 1.0468948  | 0.1987694  | 0.08352331  | 0.3525929  |            |
| 0.23078808   | 0.43640927 | 0.40307556 | 0          | 0           | 5.91039866 | 0          |
| 0.25778645   | 0.82559408 | 0.47869985 | 0.1208938  | 0.94922531  | 0          | 0.06039404 |
| 0.16413807   | 1.18471214 | 0.06176898 | 0.61315308 | 0           | 1.17782428 | 0.21533352 |
| 0.19311049   | 0.02793516 | 0.20097795 | 1.31549205 | 0.98841616  | 0.24333653 | 0          |
| 0.56820992   | 0.1756118  | 0.53396356 | 1.79756678 | 0           | 0          | 0          |
| 1.74932454   | 0.0727888  | 0          | 0.22182997 | 0           | 0.20870787 | 0.27268365 |
| 0.13083556   | 0          | 0.53994077 | 1.38627312 | 0.18695623  | 0.17336756 | 0.06425583 |
| 1.99672901   | 0.14166212 | 1.00015418 | 0.68515211 | 0.88234223  | 0          | 0.14587109 |
| 0            | 0.7343612  | 0.32014187 | 0.32473996 | 0.05136817  | 0.21210703 | 0.09750952 |
| 0.15492947   | 0.31281411 | 0.48127758 | 0.45011059 | 0.24651469  | 0.13131046 |            |
| 0.0852435    | 1.37511231 | 0.07950776 | 0          | 0           | 0          | 0.06437016 |
| 0.0338410    | 0.36152247 | 0.55050483 | 0.22539583 | 0.16884962  | 0          | 0.39586566 |
| 0.11029278   | 0.14963042 | 0.30439995 | 0.09066675 | 0.12781861  | 0          | 0.27276932 |
| 0            | 0.72497057 | 0.41701477 | 0.2427295  | 0.06518204  | 1.10100965 | 2.43809319 |
| 0.07144707   | 0.78406811 | 0.22119864 | 0.34021346 | 0.68146167  | 0.27406084 |            |
| 0.12626887   | 0          | 0.08530825 | 0.49374743 | 0.20850739  | 0          | 0.08278268 |
| 0.54943613   | 1.18170834 | 0          | 0.07890083 | 0           | 0.41370303 | 0.14021718 |

|              |            |            |            |            |            |            |
|--------------|------------|------------|------------|------------|------------|------------|
| 0.1556915    | 0.16462358 | 0          | 0          | 0.01589457 | 2.29806757 | 0.0931172  |
| 0.04221241   | 0          | 0.1817891  | 0.02278566 | 0.27137923 | 0.50281243 | 0.13651333 |
| 0            | 0.59428683 | 0          | 0.15683251 | 0.55487501 | 0          | 1.90772041 |
| 0.13383041   | 0.24415769 | 0.10734727 | 1.01428125 | 0          | 0.04849334 | 1.35872418 |
| 0.01785148   | 0.07107275 |            |            |            |            |            |
| TCGA-BT-A20W | 254        | 1          | 0.1659287  | 0.2883417  | 0.6769762  | 0.2494071  |
| 0.06365986   | 34.747550  | 0.3165699  | 0.2649626  | 0.2855423  | 0.02049537 |            |
| 0.4421753    | 0.8339562  | 0.6920201  | 0.3026269  | 0.1139813  | 0.09819985 |            |
| 0.1459354    | 0.5421356  | 0.2347925  | 0.03404034 | 0          | 3.99331456 | 3.3503     |
| 0.2673714    | 0.02229784 | 0.3819591  | 0.1489157  | 0.1312985  | 0.7202658  |            |
| 0.2061508    | 0.1037420  | 0.2228095  | 0.8792482  | 0.5469474  | 0.1769074  |            |
| 0.5989991    | 0.2633493  | 0.2985485  | 0.1639831  | 0.1103377  | 0.04837311 |            |
| 0.1607150    | 0.1919142  | 13.141020  | 0.9211453  | 0.2734077  | 0.1416461  | 0.0861961  |
| 5.6552570    | 0.7725177  | 1.8648190  | 0.5317424  | 0          | 0.8618565  | 0.1063684  |
| 0.05176015   | 1.6339360  | 0.07352713 | 0.2794381  | 1.7137030  | 0.0445619  | 0.0508683  |
| 0.1604128    | 0.1865382  | 0.2406781  | 0.0049270  | 0.0459832  | 0.1667282  | 0.131838   |
| 0.3036743    | 2.9626323  | 5.649520   | 0.3529302  | 0.04839965 | 0.05194734 | 0.1415117  |
| 0.06834435   | 0.2814436  | 0.5224499  | 0.2365484  | 0.4870587  | 0.06345384 |            |
| 0.3218698    | 0.1443123  | 0.1318872  | 0.3214301  | 0.3016498  | 0.1028352  |            |
| 0.1246223    | 0.08420285 | 0.2594122  | 0.04655625 | 0.5347428  | 0.1069486  |            |
| 0.08308151   | 0.3037112  | 0.9538655  | 0.01462499 | 0.08512548 | 0.1278733  |            |
| 0.1503110    | 0.7558864  | 0.8511180  | 0.1615981  | 0.1188317  | 0.4013177  | 0.04690726 |
| 0.8776572    | 0.2457732  | 0.1830551  | 0.3139949  | 2.2761060  | 0.1374339  |            |
| 0.6936522    | 0.01468707 | 0.3492976  | 0.5491653  | 0.3891795  | 0.3088982  |            |
| 0.3429837    | 0.1131187  | 0.1472998  | 0.3042502  | 1.6855340  | 0.1506532  |            |
| 0.6718765    | 0.1336857  | 1.0552730  | 0.2188308  | 0.2616624  | 0.4315106  |            |
| 0.2450904    | 1.7824761  | 1.1250050  | 0.2088215  | 0.05446454 | 0.3079671  | 0.3569278  |
| 1.6279070    | 0.7855073  | 0          | 0          | 0          | 0.1264983  | 0.1254194  |
| 0.2367071    | 0.2814436  | 0.6636739  | 0          | 0.3393560  | 0.2659209  | 0          |
| 0.9657295    | 1.7342883  | 0.0398820  | 0.04698219 | 0.3656767  | 1.6233260  | 0.5758514  |
| 0.1478397    | 0.5570237  | 1.8761150  | 0.3388347  | 0.1804347  | 0.6965354  |            |
| 0.04337884   | 0.3168135  | 0.1252859  | 0.0574805  | 0.3699478  | 0.3778696  |            |
| 0.3291143    | 0.5869128  | 0.5645880  | 0.2505183  | 0.7472812  | 0.3838284  | 1.54794    |
| 0.3231962    | 0          | 0.2245103  | 0.3001108  | 0.5233248  | 0.6424701  | 1.4060390  |
| 0.6999822    | 0.5683257  | 0.2519621  | 0.2573879  | 0.05386603 | 0.7426983  |            |
| 0.4483362    | 0.2058666  | 0.5645523  | 0.07371141 | 0.1668119  | 0.05177967 |            |
| 0.2494794    | 0.09706552 | 0          | 0.1695150  | 0.4882834  | 0.2119701  | 0.6393664  |
| 1.1250050    | 0.2517058  | 0.7968022  | 0.1798329  | 0.1229294  | 2.2637050  |            |
| 0.4619506    | 0.2321910  | 0.07802437 | 0.3035075  | 0.2542725  | 0.1304251  |            |
| 0.06730173   | 0.1674242  | 1.0344351  | 0.7292970  | 0.1924374  | 0.1063684  |            |
| 0.1868542    | 0.1139956  | 0.1898641  | 0.3345945  | 0.2315815  | 0.01521513 |            |
| 0.4005872    | 2.2299210  | 0.2917063  | 0.2352868  | 0.1642147  | 0.08644803 |            |
| 0.3980921    | 0.6884765  | 0.07398957 | 0.1077321  | 0.4754819  | 0.4752203  |            |
| 0.2550074    | 0.6211998  | 0.1249753  | 1.3211915  | 0.7105050  | 0.1972057  | 0.2977477  |

|                    |                     |                    |                          |            |            |            |                |
|--------------------|---------------------|--------------------|--------------------------|------------|------------|------------|----------------|
| 0.2618177          | 0.6413582           | 0.08927839         | 0.07884947               | 0.2761583  | 0.02902626 |            |                |
| 0.2166811          |                     |                    |                          |            |            |            |                |
| TCGA-FD-A5BX       | 173 1               | 0.05250827         | 0.1123028                | 0          | 0.09713859 | 0.5909264  |                |
| 54.993310          | 0.1526535           | 0.03194197         | 0 0                      | 4.0905690  | 0.5190883  | 0          |                |
| 0.0961853          | 0.08286782          | 0.2709309          | 0                        | 0.03128434 | 0.1436280  | 0.1438777  |                |
| 1.26566653         | 2.19510             | 0.05640662         | 0.7150255                | 0.7252279  | 0          | 1.1079870  | 0.6837863      |
| 2.0875720          | 0.04377233          | 0 0                | 0.1958099                | 0          | 0.2527384  | 0.04444647 |                |
| 0.1744171          | 0.08140017          | 0.03565935         | 0.01360686               | 0          | 0.3643886  | 0.1760206  |                |
| 0.05552329         | 0                   | 0.09779781         | 0.2820331                | 0.0912467  | 2.2363750  | 0.3596944  |                |
| 3.2493590          | 0.8571680           | 0.1346415          | 0.1497558                | 0.9192189  | 0 0        | 0.0390849  |                |
| 0.7896926          | 0.0580766           | 0.1073603          | 0                        | 0.4062015  | 0.6784212  | 0.01552152 |                |
| 0.05627871         | 0.1390675           | 0.0384392          | 0                        | 0.1074412  | 0          | 0.02722865 |                |
| 0.4018369          | 0.05970869          | 0.2306948          | 0.03958359               | 0          | 0          | 0.9168770  |                |
| 0.2037120          | 1.887601            | 0.1112956          | 0 0 0                    | 0          | 0.01015088 | 0.02736374 |                |
| 0.1178621          | 0.07417856          | 0.1353759          | 0.2103298                | 0.6784212  | 0.2414813  |            |                |
| 0.5389155          | 1.2571080           | 0.05395415         | 0.5073713                | 1.21775    | 0.07980357 | 0          |                |
| 0.05013921         | 0.1128865           | 0                  | 0.1733384                | 0          | 0.05149152 | 0.08832353 |                |
| 1.2051670          | 0.05798811          | 0.9365627          | 0.08056076               | 0          | 0.1544745  | 0.04691666 |                |
| 0.6753714          | 0 0 0               | 0.0225217          | 0.7111852                | 0          | 1.18882    | 0          | 0.4672442      |
| 0                  | 1.7223090           | 0.03833036         | 0                        | 0.8204599  | 0          | 0.03246121 | 0 0 0.06024007 |
| 0.1373740          | 0.81702             | 0.04914636         | 0                        | 0.04346569 | 0 0        | 0.09601126 | 0 0            |
| 0.07305051         | 0.1289294           | 0.3818294          | 0.1247181                | 0 0        | 0.6667767  |            |                |
| 0.1476541          | 0.03206578          | 0.07929364         | 0.04408332               | 0.08058088 | 0.0613823  |            |                |
| 0.5380160          | 0 0 0               | 0.0609053          | 0.3358770                | 0.07321213 | 0.08911638 |            |                |
| 0.4228994          | 0.08084336          | 0.4905804          | 0                        | 0.01262406 | 0.1100617  | 0.4235008  |                |
| 0 0                | 0.05848212          | 0.9724369          | 0.1636412                | 0.4010237  | 0          | 3.7988130  |                |
| 0.7831210          | 0.3669627           | 0                  | 0.1338035                | 0.1498726  | 0.3092699  | 0.02896022 |                |
| 0.04545588         | 0.7729795           | 0.1891685          | 0.0236897                | 0.1174705  | 0          | 0.02538429 |                |
| 0                  | 0.11696             | 0 0 0              | 0.5316051                | 0.04471876 | 0.3237249  | 0.2712449  |                |
| 0.03267796         | 0.2689587           | 0.01379595         | 0.1815385                | 0.9423516  | 0.6110717  | 0          |                |
| 0                  | 0.6620815           | 0.1569771          | 0                        | 0.05503084 | 0          | 0.04709471 | 0.05951777     |
| 0.1648469          | 0.1356225           | 0 0                | 0.0315361                | 0          | 0.03814773 | 0.1129416  | 0              |
| 0                  | 0.1962831           | 0 0 0              | 0                        | 0.06928786 | 0.06774005 | 0.06475906 | 0 0            |
| 0                  | 0.05824516          | 0.08911638         | 0                        | 0.4618052  | 0.3515426  | 0.04847443 |                |
| 4.2276410          | 0.005738476         | 0.3629312          | 0 0                      | 0.06457652 | 0          | 0.1165207  |                |
| 0.00612359         | 0.07314021          |                    |                          |            |            |            |                |
| TCGA-BL-A13J       | 81 1                | 0.7808181333333333 | 1.813314766666667        |            |            |            |                |
| 1.474127766666667  | 2.06714873          | 0.3766872          | 47.53759333333333        |            |            |            |                |
| 0.1004850666666667 | 0.9133516           | 0.46141346         | 2.0113962077432286666667 |            |            |            |                |
| 2.8238842.5657283  | 1.2929668           | 0.9103963333333333 | 0.2854126                |            |            |            |                |
| 1.409921106666667  | 0.06678455333333333 | 0.5635947          | 1.681397296666667        |            |            |            |                |
| 1.397860333333333  | 2.278968833333333   | 5.398308666666667  |                          |            |            |            |                |
| 129.4847666666667  | 0.8452758666666667  | 0.4377508266666667 | 1.8774646                |            |            |            |                |
| 1.278190446666667  | 1.1725767           |                    |                          |            |            |            |                |

1.35002093333333 0.919612593333333 5.29966796666667 3.0992845  
0.4718677 0.274145566666667 1.94785116666667 1.0954134 0.08443505  
0.6613330.420888976666667 3.75191813333333 0.342876466666667  
0.5354382 3.4986794 1.81928223333333 2.13142784666667  
0.377643413333333 0.806274833333333 3.54400653333333  
4.50119366666667 3.28417693333333 6.98917733333333 0.57585471  
1.9436341.15535566666667 1.67198189 4.15641933333333  
0.739528966666667 3.45527733333333 3.70582916666667  
0.596565266666667 0.031200466666667 0.342518033333333 0.4925976  
0.8788137 2.02784916666667 0.39174482 6.18171780333333  
4.84834973333333 0.470374533333333 1.61442491333333 3.451591  
14.7993753333333 0.472614706666667 0.1449401 0.0561401966666667  
0.94266812 0.124577233333333 1.91332786666667 0.9224018  
1.27996066666667 5.23474273333333 0.0143946833333333 2.0731692  
0.218723263333333 2.19443706666667 0.422165346666667  
3.31239036666667 1.15066226666667 11.8219883333333 0.9862948  
0.8080142 0.986735596666667 2.97448596666667 0.652337966666667  
0.12454447 0.801396466666667 10.136813 0.545740566666667  
0.0638042433333333 1.45132414333333 0.925147733333333  
0.762785916666667 0.664723466666667 2.03048422666667 1.0749028  
0.6889641 0.946102633333333 3.38439973333333 1.5341989 2.43888375  
1.58613373333333 1.21834733333333 2.03899573333333  
0.930407116666667 1.82583649166667 3.9883058 0.398954966666667  
3.12067163333333 6.84156066666667 2.71340273333333  
4.29973533333333 1.48427654 2.2870251 6.1490041.08097194 2.678019  
0.862311583333333 9.6399030.660433166666667 1.08758213333333  
0.800854766666667 6.00540109666667 1.38832093333333  
3.18648976666667 0.544630433333333 0.197686966666667  
2.84781223333333 3.14794396666667 2.4149936 0.4822664 0  
0.0960794533333333 0.0934772 0.14534448 2.5478929 1.80245576666667  
4.59348756666667 1.6092478 2.53420173333333 0.277275233333333  
3.4956629 1.73934296666667 4.5792249 9.26681214 3.06209333333333  
2.1241204 0.0886235133333333 1.25992563333333 1.9917848  
6.98346166666667 2.6015304 0.862387566666667 2.58240393333333  
2.52982923333333 2.9757781.7482983 0.19129601 0.592439433333333  
2.43315977 4.5539190.93673803333333 0.12689566 0.230887133333333  
6.54386144 0.734847466666667 4.75632483333333 0.320661766666667  
2.2800844 4.19850803333333 0.634803343333333 0.564619533333333  
0.1972869 0.09035505 3.42751230666667 0.376898276666667 1.1845453  
0.545960833333333 4.30576266666667 2.19536824333333  
4.25984576666667 0.946401566666667 0.2839518 1.77090843333333  
8.84708093333333 0.13196305 2.6270852 1.56338076666667 2.7482307  
0.374745966666667 0.49104913 4.5694711.09697533333333  
0.124916533333333 1.32629316666667 3.9119121 1.1475882

|                    |                            |                          |                                           |
|--------------------|----------------------------|--------------------------|-------------------------------------------|
| 0.833517566666667  | 0.8317575                  | 4.391631666666667        | 2.06397691333333                          |
| 1.6915352          | 0.851436796666667          | 0.323563296666667        | 2.032724                                  |
| 6.37403529333333   | 1.25118233333333           | 1.450410106666667        |                                           |
| 0.604101933333333  | 3.286285066666667          | 0.535824213333333        | 1.9366129                                 |
| 1.85233113333333   | 2.5402585                  | 9.4647031.10703423333333 |                                           |
| 0.036458666666667  | 3.0616321                  | 0.242865346666667        | 2.05792373333333                          |
| 5.02345883333333   | 0.760227423333333          | 0.18875452               | 0 0.0105787466666667                      |
| 6.54997223333333   | 12.9122086666667           | 1.10913803333333         |                                           |
| 0.998592563333333  | 3.201961166666667          | 1.24062253333333         |                                           |
| 1.83442573333333   | 10.3735228                 | 1.8618451                | 0.0335695 3.467749466666667               |
| 1.3461798          | 0.03671224                 | 4.6651471                | 1.2744519 0.1975913                       |
| 0.984056366666667  | 4.7932391.5591372          | 0.5130775                | 2.2014349 1.2465828                       |
| 0.0191191393333333 | 4.3790930.573137266666667  | 0.0541057686666667       |                                           |
| 0.9995609          |                            |                          |                                           |
| TCGA-CF-A8HX       | 345 0                      | 0.1546617                | 0.1819316 0.1121792 0.4005667             |
| 0.07120464         | 49.073490                  | 0.1011683                | 1.1572360 0 0.4807139 0.7047779           |
| 3.61217            | 0.3928195                  | 0.09870197               | 0.07322547 0 0 0.1382208 0.1269157        |
| 0.1271364          | 2.94976768.855340.04984325 | 0                        | 0.1424093 0.05552159                      |
| 0.09790638         | 3.8938770.05124072         | 0.07735813               | 0 0.06556362 0.2718978                    |
| 0.0164895          | 1.4293140.1099693          | 0.1883717                | 0.1007 0.05076627 0.04809436              |
| 0.6391557          | 0 35.507380.1471881        | 0.02912487               | 0.04801013 4.236676                       |
| 0.6853447          | 7.0633130.0411464          | 0.1589205                | 0.1777453 0.08244748                      |
| 4.2691490.03965828 | 0.04135329                 | 4.1628340                | 0 1.2087970.03322883                      |
| 0.02900635         | 0.3464748                  | 0.04636581               | 0.03589367 0.04995679 0.01371547          |
| 0.1989209          | 0.1228859                  | 0.1018995                | 0.1205002 11.060450.2924137               |
| 0.1082717          | 0.0258240.3165666          | 0                        | 0.1049332 0.2520808 0.1175927             |
| 0.1676257          | 0 0.1200056                | 0.1452742                | 0.09834542 0 0.2811670                    |
| 0.04646405         | 0.02690924                 | 0.02417975               | 0.03155998 0.6063124 0 0                  |
| 0.2364621          | 1.0432060                  | 0.1269524                | 0 0.07472242 10.863032.291828             |
| 0.1606669          | 0.06329301                 | 1.3965180.1748886        | 0.5291296 0 0 0.1170696                   |
| 5.1804710.2562036  | 1.75862                    | 0.02190365               | 0.05209271 0.3640005 0.8291504            |
| 0.05932965         | 0.1918166                  | 0                        | 0.07322547 0.2786156 0.4873562 0.02496418 |
| 0.5171650.04984325 | 1.1851980.03263546         | 0.2341391                | 0.6604712 0.06091953                      |
| 1.8366480.3595251  | 0.2294727                  | 0                        | 0.1530962 0.05323065 0.2832421            |
| 3.5416570.04342778 | 0 0                        | 0.0471635                | 0.8417026 2.8421260 0.06995544            |
| 0.3442693          | 0 0.08435011               | 0                        | 0.6741908 0 0.4582603 0.3530454           |
| 0.02833466         | 0.07006719                 | 0                        | 0.9256603 0.2711999 0.2618219 0           |
| 0.7406351          | 0 0                        | 0.02690924               | 0.9221844 0.4205065 0.4724818             |
| 0.02335573         | 0.02857463                 | 0                        | 0.04696152 0.06693091 0.4862756 0.14813   |
| 0.5604181          | 0.07960446                 | 0.1470814                | 4.5401080 0.2756144 0 0                   |
| 0.1170696          | 0.1596920.4539691          | 0.02051546               | 0.5479153 1.4037980.2391234               |
| 0.1279523          | 0 0.2399860.4011774        | 0.04884416               | 0.4844087 0 0.08972248                    |
| 0                  | 0.8681463                  | 0.3618982                | 0.2197498 0.2528073 0.1811079 0.03951537  |
| 3.9571210.6391557  | 0.2598805                  | 0.3300877                | 0.1219068 0.1374986                       |

|              |            |            |            |            |            |             |
|--------------|------------|------------|------------|------------|------------|-------------|
| 0.5551342    | 0.08307208 | 0          | 0          | 0.02585825 | 0.5548463  | 0.1264036   |
| 0.04862756   | 0          | 0.1248446  | 0.2980236  | 1.6118730  | 0.07174819 | 0           |
| 0.2786662    | 0          | 0.1213521  | 0.02494998 | 0          | 0          | 0.2119871   |
| 0.02822526   | 0.1023619  | 0          | 0.2693929  | 0.05064903 | 0.1323301  | 0.6256841   |
| 0.4965516    | 0          | 0.5947398  | 0.03937348 | 0.03169224 | 1.34553    | 0.03106378  |
| 3.0412175    | 3.162170   | 0.03549531 | 0.07400797 | 0          | 0.06832096 | 0.01902084  |
| 0            | 0          | 0          | 0          | 0          | 0          | 0           |
| 1.1178790    | 0.04869955 | 0.0430865  |            |            |            |             |
| TCGA-PQ-A6FI | 372        | 0          | 0.05367802 | 0.05740229 | 0.03893373 | 0.1390236   |
| 0.1153264    | 53.087380  | 0.1092379  | 0.2155135  | 0.07389848 | 0.1166927  |             |
| 0.8855358    | 0.2014397  | 1.47256    | 0.01740444 | 0.02474061 | 0.07624251 |             |
| 0.1208581    | 0.07015247 | 0.04477379 | 0.03523863 | 0.3088742  | 1.797659   |             |
| 51.236940    | 1.383917   | 0.5770693  | 0.6919585  | 0          | 0.4077613  | 0.5747492   |
| 0.1778398    | 0.1073939  | 0          | 1.2970340  | 0.08149863 | 0.02289186 | 0           |
| 0.06735879   | 1.11839    | 0.08505876 | 0.0918059  | 0          | 0.4221737  | 0.9254156   |
| 0.2383929    | 0.1415161  | 0.0266604  | 0.5189689  | 1.1193458  | 6.039580   | 0.05712228  |
| 0.7170295    | 0.06643492 | 0          | 0.3505054  | 0.3303382  | 0.02392063 | 0.5990567   |
| 0            | 0          | 0.1678136  | 0          | 0.01858552 | 0.1660596  | 0.1287365   |
| 0.03467674   | 0.01428057 | 0.0632857  | 0.06255284 | 0.1807594  | 0.08364333 | 0           |
| 0.0811898    | 0.01670114 | 0.0134440  | 0.04883107 | 0.2594174  | 0.02427925 |             |
| 0.1908851    | 0.04081257 | 0.03878493 | 0          | 0.1249501  | 0.06349178 | 0.1365299   |
| 0.02772876   | 0.3903356  | 0          | 0.0322523  | 0.01245242 | 0          | 0.002190687 |
| 0.3677807    | 0.05535668 | 0.04300307 | 0.1225245  | 0.5430939  | 0.09588551 | 0           |
| 0.1323747    | 0.1556023  | 0.4623835  | 0.5629116  | 0.1115244  | 0.03954049 |             |
| 0.2077224    | 0.02427925 | 0.3479563  | 0.1908186  | 0.03158317 | 0.05417469 |             |
| 2.0790260    | 0.5385526  | 0.0380102  | 0.2892748  | 0.4737475  | 0.08633131 |             |
| 0.2204489    | 0.4882040  | 0.1270708  | 0.1326149  | 1.22853    | 0.1472922  |             |
| 0.7852735    | 0.03459792 | 0.6271305  | 0.3851079  | 0.2437861  | 0.04114348 |             |
| 0.1691454    | 0.5116299  | 0.7486764  | 0.06826496 | 0.0563818  | 0.1062694  | 0           |
| 0.1685213    | 0.6713287  | 0          | 0.02345622 | 0.05332079 | 0          | 0.1622930   |
| 0.03062995   | 0          | 0.5824875  | 0          | 0.02927517 | 0.2677427  | 0.30281     |
| 0.1817682    | 0.3542731  | 0          | 0.07295409 | 0.1081569  | 2.47128    | 0.1913867   |
| 0.2104354    | 0.3171476  | 0.1428057  | 0          | 0.05261436 | 0.03735727 | 0.4561776   |
| 0.02245293   | 0.08199149 | 0.1134841  | 0.01983464 | 0.06838763 | 0.03259762 |             |
| 0.07743177   | 0.4050489  | 0.1407040  | 0.2852708  | 0.1381405  | 0.03311166 |             |
| 0.9436533    | 0.2676587  | 0          | 0.6507579  | 0.1035584  | 0.3792228  | 0           |
| 0.2813533    | 0.01424049 | 0.4443820  | 0.1434059  | 0.09484789 | 0.09769776 |             |
| 0.1951678    | 0.2178388  | 0          | 0.07265234 | 0.1921399  | 0.0381531  | 0.07784935  |
| 0            | 0.1434787  | 0          | 0          | 0.1316117  | 0.3221402  | 0.3017188   |
| 1.0536930    | 0.2605663  | 5.9389290  | 0.04230986 | 0.01590709 | 0.06048909 | 0.08649481  |
| 0.1062694    | 0          | 0.08974554 | 0.2584479  | 0.06580585 | 0.03375407 | 0.03483544  |
| 0.05777263   | 0.2555434  | 2.5112130  | 0.06640387 | 0          | 0.01934319 | 0.05900421  |
| 0.03743766   | 0.1385491  | 0          | 0          | 0.3745575  | 1.6533270  | 0.01959213  |
| 1.3396320    | 0.1274965  | 0.02556891 | 0.1340585  | 0.0779529  | 0.03829707 |             |
| 0.01858741   | 0.6827564  | 0.3279660  | 1.0220180  | 0.06468734 | 0.9217103  |             |

|              |            |            |            |             |             |                |            |
|--------------|------------|------------|------------|-------------|-------------|----------------|------------|
|              | 0.9701431  | 0.08799472 | 0.2911051  | 0.04517236  | 0           | 0.02640605     | 0          |
|              | 0.1735697  | 0.03004804 | 0.03738479 |             |             |                |            |
| TCGA-FJ-A3Z7 | 945        | 0          | 0.1430958  | 0.1391127   | 0.1887094   | 0.1323612      |            |
|              | 0.13974533 | 0.307040   | 0.1359681  | 0.25528     | 0.07122141  | 0.1790907      | 0.03856379 |
|              | 0.9149304  | 0.6974043  | 3.0382211  | 1.107170    | 0.0991615   | 0.0923857      | 1.354644   |
|              | 2.0401490  | 0.03100226 | 0.1067497  | 0.05346767  | 27.26825165 | 15350.07785795 |            |
|              | 0.2657169  | 0.5390166  | 0.4669961  | 0.08234975  | 0.9223172   | 0.04309894     |            |
|              | 0.06506647 | 0.02794901 | 0.3584492  | 0.5821332   | 0.02773886  | 0.6386718      |            |
|              | 0.1519577  | 0.2112543  | 0.08469952 | 0.05006192  | 0.06067877  | 0.5039985      | 0          |
|              | 12.4097    | 0.8253398  | 0.2939657  | 0.01615267  | 1.4149180   | 4747221        | 3.618661   |
|              | 0.03460853 | 0.9356842  | 0.7130133  | 0           | 0.8590919   | 0.1000706      | 0.04985499 |
|              | 1.5798950  | 0          | 0.7843328  | 0.1117960   | 0.06005525  | 0.1942816      | 0.07799723 |
|              | 0.09057125 | 1.1765320  | 0.0461447  | 0.1394282   | 0.1929390   | 0.09523152     | 0.2027071  |
|              | 9.6623710  | 0.2705464  | 0.1720175  | 0.005430187 | 0.1479258   | 0.1857494      |            |
|              | 0.02942001 | 0.2505773  | 0.24727    | 0.3054809   | 0.3581815   | 0.1009376      |            |
|              | 0.1719728  | 0.4135952  | 0.0671998  | 0.6621765   | 0.1289954   | 0              | 0.0452671  |
|              | 0.1220265  | 0.5468336  | 0.7075310  | 0.05210832  | 0.1540697   | 1.176578       |            |
|              | 0.03669089 | 0          | 0.3208060  | 0.09427433  | 4.0082011   | 8090470        | 0.3716297  |
|              | 0.3356060  | 1.7685070  | 0.1541477  | 0.1530817   | 0.06564536  | 2.4165920      | 0.1723957  |
|              | 0.9136161  | 0.04145246 | 0.1314466  | 0.07654085  | 0.6625341   | 0.4755423      |            |
|              | 0.1613383  | 0.4966324  | 0          | 0.2879103   | 0.3883441   | 0.05249387     | 0.3534303  |
|              | 0.2096176  | 2.8231280  | 0.1921494  | 0.1969361   | 0.2920078   | 0.1024797      |            |
|              | 0.5793067  | 0.4535986  | 0.1826712  | 0.4099188   | 0.03219257  | 0.1790907      |            |
|              | 0.5105077  | 0.9967901  | 0.07305483 | 1.4495590   | 0.03230533  | 0              | 0.07866245 |
|              | 0.2140775  | 0          | 0.17652    | 0.1131122   | 0.04791258  | 0.07094748     | 0.5561712  |
|              | 0.4336392  | 0.06870147 | 1.5968481  | 1.200140    | 0.2062690   | 0.9501670      | 0.7785795  |
|              | 0.4524145  | 0.2607872  | 0.3493626  | 0.5883450   | 0.03187732  | 0.2716026      |            |
|              | 0.5438507  | 0.1632420  | 0.03311732 | 0.03274112  | 0.04806865  | 0.1325883      | 0          |
|              | 0.1219748  | 0.1227030  | 0.2754165  | 0.1571239   | 0.1673897   | 0.2541095      |            |
|              | 0.8144439  | 1.2567840  | 0.03311732 | 0.1689742   | 0           | 0.2954041      | 0.4477268  |
|              | 0.7636732  | 0          | 0.8756253  | 1.25649     | 0.3016926   | 0.06457297     | 0.1689226  |
|              | 1.1645420  | 0.1405971  | 0.05869025 | 0.3783368   | 0.04623144  | 0.07032079     |            |
|              | 0.03247596 | 0.3303304  | 0          | 0           | 0.3189571   | 1.2027810      | 0.03323666 |
|              | 0.4703986  | 0.09714994 | 0.5108560  | 0.1538050   | 0.2505773   | 0.5103624      | 0.3144263  |
|              | 0.3541183  | 0          | 0.2256517  | 0.7368713   | 0.3721165   | 0.1636039      | 0.2110566  |
|              | 0.3150230  | 0.5308301  | 0.3253820  | 0.05039985  | 0.1810437   | 0              | 0.3515822  |
|              | 0.07149746 | 0.1417641  | 0.0209856  | 0.2178702   | 0           | 0.1945133      | 0.8693974  |
|              | 0.04748094 | 0.1183838  | 0          | 0.07209627  | 0.0464741   | 0.4271658      | 0.6207256  |
|              | 0.3480442  | 0.04504602 | 0.9138997  | 0.1324693   | 0.1066263   | 0.598335       |            |
|              | 0.1828958  | 1.2249531  | 1.063410   | 0.05118061  | 0.4979891   | 0.1094739      | 0.2873262  |
|              | 0.03199713 | 0.1483620  | 0.4082692  | 0.01365385  | 0.05436054  |                |            |
| TCGA-E7-A7PW | 416        | 0          | 0.1904157  | 0.1425389   | 0.1381123   | 0.3346497      |            |
|              | 0.08766541 | 31.828130  | 0.1326828  | 0.2352722   | 0.4517533   | 0.2621451      |            |
|              | 0.01881599 | 0.07967119 | 0.6124979  | 1.4824050   | 0.1234799   | 0.1822792      |            |

|                            |                                    |                   |                    |                            |                    |                  |
|----------------------------|------------------------------------|-------------------|--------------------|----------------------------|--------------------|------------------|
| 0.2253835                  | 0.2590233                          | 0                 | 0.3176582          | 0.09375329                 | 0                  | 3.85973750.23173 |
| 0.2103970.1023539          | 0                                  | 0.2050705         | 0.1205399          | 3.6644140.1892590.04762072 |                    |                  |
| 0.08182105                 | 0.4843219                          | 0.6086435         | 0.2436176          | 0.6049092                  | 0.2707831          |                  |
| 0.3021970.0974124          | 0.08836517                         | 0.0592126         | 0.6885487          | 0                          | 32.06191           |                  |
| 0.6644528                  | 0.4661518                          | 0.02364356        | 0.6903651          | 0.5459754.0937440.2026337  |                    |                  |
| 0.7337214                  | 0.1178346                          | 0.1015073         | 1.7378950.2441315  | 0.04582185                 |                    |                  |
| 3.5626250.06750237         | 0                                  | 1.4031990         | 0.03021777         | 0.2589897                  | 0.5137601          |                  |
| 0.5302968                  | 0.1230111                          | 0.07598766        | 0.2347021          | 0.1210353                  | 0.1672748          |                  |
| 0.3956183                  | 8.5327670.1800063                  | 0.08886763        | 0.07153622         | 0.2165272                  |                    |                  |
| 0.06274426                 | 0.2153186                          | 0.5078548         | 0.4343316          | 0.4127533                  | 0.1165089          |                  |
| 0.0738740.1324875          | 0.3632414                          | 0                 | 0.2769328          | 0                          | 0.0572054          | 0.08834666       |
| 0.08930853                 | 0.05051264                         | 0.3698760.2945558 | 0                  | 0.2788253                  | 1.080038           |                  |
| 0.05370651                 | 0.1172255                          | 0                 | 0.1839928          | 2.6496261.6061660.1978091  |                    |                  |
| 0.1168872                  | 0.9824906                          | 0.1291911         | 1.8172070.07521155 | 0.05601856                 |                    |                  |
| 0.1441332                  | 3.7831370.1892591.9104440.08764352 | 0.06413527        | 0.6162042          |                            |                    |                  |
| 0.5614564                  | 0.08593554                         | 0.2361599         | 0                  | 0.1352301                  | 0.2401173          | 0.9631917        |
| 0.1844117                  | 0.2188728                          | 0.2454632         | 0.9090020.2008999  | 0.2402219                  |                    |                  |
| 0.2710520                  | 1.72568                            | 0.5164116         | 0.1664857          | 0                          | 0.2827324          | 0.2621451        |
| 0.7970759                  | 2.0124930.1069344                  | 0.1664157         | 0.09457425         | 0.1161331                  |                    |                  |
| 0.5757132                  | 2.61131                            | 0.1086557         | 0.2153186          | 0.6291611                  | 0.07013233         |                  |
| 0.4673241                  | 0.06784158                         | 0.1953052         | 0.2011244          | 1.8537960.3118220.2093097  |                    |                  |
| 0.34506                    | 0                                  | 1.2273160.3450245 | 0.1017943          | 0.2556908                  | 0.2532922          |                  |
| 0.1343331                  | 0.06221416                         | 0.19878           | 0.6655623          | 0.1991220.3878053          | 0.07668001         |                  |
| 0.1407215                  | 0.1698173                          | 0.2890894         | 0.2197432          | 0.2993453                  | 0.1631767          |                  |
| 0.09199641                 | 0.5880424                          | 0.1761889         | 3.8211870.3560564  | 0.2908540.2061141          |                    |                  |
| 0.1836799                  | 0.2882663                          | 0.06553628        | 0.7518746          | 0.07577441                 | 0.6035715          |                  |
| 0.3587082                  | 0.1682302                          | 0.1102722         | 0.2967137          | 1.2955                     | 0.2469599          |                  |
| 0.2663154                  | 0.3691952                          | 0                 | 0.1631856          | 0.09507376                 | 2.1885780.08911204 |                  |
| 0.1082202                  | 0.07781253                         | 0.1463277         | 0                  | 1.29135                    | 1.2295510.2133057  |                  |
| 0.4714193                  | 0.1500886                          | 0.1410708         | 0.6516785          | 0.05113816                 | 0.1884883          | 0                |
| 0.0676516                  | 0.2606616                          | 0.03890626        | 0.05986906         | 0.1235741                  | 0.1024704          |                  |
| 0.3021689                  | 1.3612190                          | 0.05888974        | 0                  | 0.3087783                  | 0                  | 0.1992077        |
| 0.3378958                  | 0.2126059                          | 0.01396842        | 0.09490667         | 1.7705540.2085015          |                    |                  |
| 0.1260254                  | 0.2160076                          | 0.1959868         | 0.05668895         | 0.2377774                  | 0.2370237          |                  |
| 1.0189040.03296819         | 0.6054971                          | 0.1454270.1170561 | 1.5072190.03824497 |                            |                    |                  |
| 1.3184065.7411190.03121497 | 0.03037227                         | 0.0801215         | 0.0841151          | 0.1053810                  |                    |                  |
| 0.4708415                  | 0.07328162                         | 0.2121882         |                    |                            |                    |                  |
| TCGA-4Z-AA7S               | 1064                               | 1                 | 0.3039607          | 0.2762925                  | 0                  | 0.2389849        |
| 72.684750                  | 0.08836827                         | 0.05547184        | 0.6276935          | 0.1051259                  | 0.202881           |                  |
| 0.5296041                  | 0.9014719                          | 0.1478333         | 0.07274308         | 0.03597798                 | 0.08554738         |                  |
| 0.2317292                  | 0.0724397                          | 0.1496584         | 0.06246612         | 2.04002954.794020.1399403  |                    |                  |
| 0                          | 0.2798807                          | 0.2727951         | 0.09620898         | 1.0995310.1007047          | 0.3420764          |                  |
| 0.03265274                 | 1.0952580.2307497                  | 0.2916651         | 0.6583751          | 0.2470007                  |                    |                  |
| 0.1234039                  | 0.02827263                         | 0.1066531         | 0.2126725          | 0.3140373                  | 0.1054689          |                  |



|                    |                            |                            |                                    |                   |                          |                |            |
|--------------------|----------------------------|----------------------------|------------------------------------|-------------------|--------------------------|----------------|------------|
| 4.7599560.2410605  | 0.2289595                  | 0.03774223                 | 1.2244780.5942319                  | 8.023553          |                          |                |            |
| 0.2425983          | 1.5616530.1209210.08101809 | 0.5751394                  | 0.07794145                         | 0.02438181        |                          |                |            |
| 2.5940790.1616311  | 0.1535687                  | 0.3393829                  | 0.06530549                         | 0.01096287        |                          |                |            |
| 0.2512978          | 0.1822479                  | 0.7406989                  | 0.3436348                          | 0.01347768        | 0.2443403                |                |            |
| 0.1288057          | 0.5117901                  | 1.2630514.4314440.05746883 | 0.01182162                         | 0.01903222        |                          |                |            |
| 0.2592319          | 0.06677246                 | 0                          | 0.3152679                          | 0.2311079         | 0.2745326                | 0              |            |
| 0.2653315          | 0.1216066                  | 0                          | 0.07850933                         | 0.2210340         | 0                        | 0.2027275      |            |
| 0.1900843          | 0.02170898                 | 0.3810978                  | 0.03918329                         | 0.0608780.2749078 |                          |                |            |
| 1.6308720.01071647 | 0.03118786                 | 0.04684959                 | 0.1101404                          | 2.0140950.4504189 |                          |                |            |
| 0.03947035         | 0.1554893                  | 0.3220719                  | 0.2062279                          | 1.0399120.2401205 |                          |                |            |
| 0.08942245         | 0.1533866                  | 2.7251910.1007047          | 0.5591012                          | 0.03766684        |                          |                |            |
| 0.2559479          | 0.2235561                  | 0.1222163                  | 0.08573684                         | 1.2566070         | 0.03597798               |                |            |
| 0.1760048          | 2.1424780.07359412         | 0.5558426                  | 0.1469374                          | 0.4152648         | 0                        |                |            |
| 0.1533866          | 0.3827557                  | 0.05986337                 | 1.3654780.3532920.3181080.03990891 |                   |                          |                |            |
| 0.03761049         | 0.1046156                  | 0.3180932                  | 1.1779330                          | 0                 | 0.07548445               | 0.04634583     |            |
| 0.09190112         | 0.7503184                  | 0.2168090.06874262         | 0.5391667                          | 0                 | 0.3315509                | 0              |            |
| 0.3897073          | 0.04013186                 | 0.8363001                  | 0.9050210.3619645                  | 0.06885243        |                          |                |            |
| 0.8038491          | 1.3294330.5774125          | 0.1151002                  | 1.7142690.92996                    | 0                 | 0.1862109                |                |            |
| 0.07932814         | 0.6666273                  | 0.03178586                 | 0.1160726                          | 0.04590162        | 0                        | 0.07745125     |            |
| 0                  | 0.3507762                  | 0.9556901                  | 0.3907186                          | 0.4405617         | 0.5866827                | 0.08593762     |            |
| 1.7580930.04736442 | 0                          | 0.1316080                  | 0.5751996                          | 0.1046156         | 0.4779628                | 0              |            |
| 0.4732394          | 0.5205510.1678412          | 0.3394819                  | 0.0789407                          | 0.2902466         |                          |                |            |
| 0.3613703          | 0.1714191                  | 0.2890064                  | 0.2160482                          | 0.08616317        | 0                        | 0.7312245      |            |
| 0                  | 0                          | 0.1863183                  | 0.1761142                          | 0.4659635         | 0.4684959                | 5.1423610.3405 |            |
| 0.8433490.0838553  | 0.1576339                  | 0.4503628                  | 0                                  | 0.1504420         | 0.03176243               |                |            |
| 0.1650029          | 0.03105304                 | 0                          | 0                                  | 0.04089338        | 2.3686941.0019810.117764 |                |            |
| 0.2585157          | 0.07794145                 | 0.05476699                 | 0                                  | 0.1192483         | 0.1716219                | 0.1696914      |            |
| 0                  | 1.0131532.7821740.1664155  | 0.1257340                  | 0.1082955                          | 0.01809852        |                          |                |            |
| 0.1792386          | 0.7882521                  | 0.2168635                  | 0                                  | 0.6237653         | 0.07738173               | 0.155714       |            |
| 0.2546865          | 0.06105046                 | 1.3048342.5157590.2939879  | 0.04848327                         | 0                 |                          |                |            |
| 0.06713648         | 0.01869108                 | 0                          | 0.6359730.2818142                  | 0.03175463        |                          |                |            |
| TCGA-CF-A3MH       | 398                        | 0                          | 0.1425845                          | 0.2922481         | 0                        | 0.3407116      | 0          |
| 0.1554471          | 0.3903183                  | 0                          | 0.02348256                         | 0.02604133        | 0.2229512                | 1.123249       |            |
| 0.1990514          | 0.1664021                  | 0                          | 0.2786758                          | 0.1811692         | 0.06371372               | 0.05850257     |            |
| 0                  | 1.58418445.646120.0547037  | 0.07664324                 | 0                                  | 0.08531007        | 0                        | 0.8940148      |            |
| 0                  | 0.05943118                 | 0.05105679                 | 0.3777744                          | 0.1091916         | 0.07600935               | 0.3088364      |            |
| 0.1629355          | 0.0526249                  | 0.02762994                 | 0.02958751                         | 0.1385587         | 0.1227595                |                |            |
| 0.08245713         | 10.600880.03769293         | 0.08950194                 | 0.02950743                         | 0.8137175         |                          |                |            |
| 0.3716634          | 3.0583690.09483343         | 0.7325539                  | 0.05252101                         | 0                 | 0.8023209                |                |            |
| 0.6398256          | 0.02541608                 | 0.7800342                  | 0                                  | 0.08004152        | 0.5572024                | 0              |            |
| 0.006856746        | 0.1457668                  | 0.2137261                  | 0.3860595                          | 0.1151395         | 0.0210741                |                |            |
| 0.1719259          | 0.1321717                  | 0.3044429                  | 1.5429254.0845430.08985995         | 0.009242315       |                          |                |            |
| 0                  | 0.1216028                  | 0                          | 0.05374399                         | 0.2288753         | 0.04517088               | 0.3219504      | 0          |
| 0.09219557         | 0.1984150                  | 0                          | 0.2592114                          | 0                 | 0                        | 0.0964754      | 0.01857634 |

|              |            |            |             |            |            |            |
|--------------|------------|------------|-------------|------------|------------|------------|
| 0.009698512  | 0.4825915  | 0          | 0.09519062  | 0.2686587  | 1.4025440  | 0.0223421  |
| 0.02438313   | 0.07325539 | 0          | 0.4330284   | 0.5146721  | 0          | 0.1118387  |
| 0.1751656    | 0.02687199 | 0.5134854  | 0.1173311   | 0.1048677  | 0.1498998  |            |
| 1.7300430    | 0.03936621 | 0.5165887  | 0.004206926 | 0.04002076 | 0.06991178 |            |
| 0.06370034   | 0.0214497  | 0.5403386  | 0           | 0.1406406  | 0.1773552  | 0.9656003  |
| 0.01917899   | 0.4469820  | 0.03829259 | 0.4440753   | 0.02507253 | 0.1199199  |            |
| 0.2797281    | 0.04680205 | 0.9468713  | 1.1048350   | 0.1416654  | 0          | 0.0882133  |
| 0.1226850    | 0.2486899  | 0.3348818  | 0           | 0          | 0          | 0.2155489  |
| 0.03390088   | 0.1074880  | 0.3967327  | 0.04376296  | 0.3564156  | 0          | 0.1523394  |
| 0.7544212    | 1.2971910  | 0.1306104  | 0.05382984  | 0.2394137  | 0.4376296  |            |
| 0.3889239    | 0.1323338  | 0.06382098 | 1.5173350   | 0.03882198 | 0.0206733  |            |
| 0.3745974    | 0.02485065 | 0.2117436  | 0.06579203  | 0.02195276 | 0.06055252 |            |
| 0.07215734   | 0.05999043 | 0.1867931  | 0.4552095   | 0.2296251  | 0.06115695 |            |
| 0.06718729   | 0.4581675  | 0.0370302  | 0.09074725  | 0          | 0.05730864 | 0.1798798  |
| 0.2044750    | 0.4276541  | 0          | 0.2592114   | 0.3703467  | 0.05248829 | 0.1474510  |
| 0.2978313    | 0.07705216 | 0.02144288 | 0.1373418   | 0.1266823  | 0.06893022 | 0          |
| 0.3970014    | 0          | 0.1688250  | 0.1456663   | 0.08551188 | 0.1214324  | 0.842437   |
| 0.4603481    | 0.1109199  | 0.2333058  | 0.1592154   | 0.2112695  | 0.1115811  |            |
| 0.03191049   | 0.2058310  | 0.02731557 | 0.2243507   | 0.1213886  | 0.03735862 |            |
| 0.07711094   | 0          | 0.2020233  | 0.5668838   | 0          | 0.1653639  | 0          |
| 0.0776917    | 0.07667231 | 0.1326672  | 0.0261491   | 0          | 0.6559960  | 0.07864056 |
| 0            | 0.1222968  | 0.03891164 | 0.05495349  | 0.4313869  | 0.4662544  | 0          |
| 0.2899653    | 0          | 0.09739156 | 0.4109449   | 0          | 1.4479393  | 0.7831890  |
| 0.01895246   | 0.1999850  | 0.2624414  | 0           | 0.02258544 | 0.2599068  | 0.02078552 |
| 0.09102954   |            |            |             |            |            |            |
| TCGA-DK-A6B2 | 477        | 0          | 0.06830974  | 0.1899279  | 0          | 0.1769191  |
| 42.277790    | 0.2379932  | 0.2184511  | 0.1246631   | 0.3761678  | 0.0540004  |            |
| 1.0915320    | 0.1464850  | 0.5824455  | 0.05168007  | 0.04843766 | 0          | 0.08971783 |
| 1.1605730    | 0.05697836 | 0.1121102  | 0.05615259  | 1.92954646 | 0.172090   | 0.04402874 |
| 0.01468737   | 0.1886946  | 0.04904467 | 0           | 1.3046880  | 0.3621055  | 0.1025008  |
| 0.2054674    | 0.4343642  | 0.4967345  | 0.1019613   | 0.4340103  | 0.1318339  |            |
| 0.2218627    | 0.05083016 | 0.1175224  | 0.1168306   | 0.2117229  | 0.03160301 |            |
| 4.9069510    | 0.1733570  | 0.07718185 | 0.2883844   | 0.3302155  | 0.07122295 | 4.350734   |
| 0.07269285   | 0.5966213  | 0.3985644  | 0           | 0.2432985  | 0.2452233  | 0.06575253 |
| 0.5829731    | 0          | 0.04601578 | 0.3050810   | 0.02935249 | 0.02759355 | 0.1202365  |
| 0.2866987    | 0.4121839  | 0.3971613  | 0.01817321  | 0.1537511  | 0.08684039 |            |
| 0.2800382    | 2.8384831  | 1.1741     | 0.1291510   | 0.08501434 | 0.02281147 | 0.0932124  |
| 0.1050414    | 0          | 0.6477791  | 0.05193738  | 0.1974282  | 0.3134732  | 0.1590094  |
| 0.1473386    | 0          | 0.03528715 | 0.2483672   | 0          | 0          | 0.09508046 |
| 0.08363496   | 0.2846789  | 0.03522299 | 0.10945     | 0.3853935  | 0.6492454  |            |
| 0.1027556    | 0.3083923  | 0.04211444 | 0.0330028   | 0.6336846  | 0.7163518  |            |
| 0.1064431    | 0.09504616 | 0.1762294  | 0.2162815   | 0.5904044  | 0.08094419 | 0          |
| 0.0344709    | 1.1562830  | 0.3655216  | 0.01934846  | 0.04601578 | 0.2411532  |            |
| 0.07324251   | 0.6843932  | 1.29904    | 0           | 0.09702493 | 0.08438175 | 1.223535   |

|              |              |             |             |             |             |             |
|--------------|--------------|-------------|-------------|-------------|-------------|-------------|
| 0.01102598   | 0.8851171    | 0.2641724   | 0.5105968   | 0.2017984   | 0.2412963   |             |
| 0.3291105    | 0            | 0.9713006   | 0.4763765   | 0.1665063   | 0.03587527  | 0.1014275   |
| 0.2821259    | 0.8578292    | 0.5896022   | 0.07672334  | 0.1194      | 0.1017827   | 0           |
| 0.1652251    | 0.1124138    | 0.03897916  | 0.06179472  | 0.5464444   | 0.05031855  |             |
| 0.4843161    | 0.1946999    | 0.1050957   | 0           | 0.2891439   | 0.8576166   | 1.026199    |
| 0.2166270    | 0.1376387    | 0.2515928   | 0.6787612   | 0.5903696   | 0.2935249   |             |
| 1.4538570    | 0.04819066   | 0.1450716   | 0.1901609   | 0.4119847   | 0.05714644  |             |
| 0.1391213    | 0.09627867   | 0.06310307  | 0.8876953   | 0.04148318  | 0.1478076   |             |
| 0.8590973    | 0.1446234    | 0.1980168   | 0.07031813  | 0.1580150   | 0.9573032   |             |
| 0.1703090    | 0.06956066   | 0.05915311  | 0.8566135   | 0.1034127   | 0.09404196  |             |
| 0.6110642    | 0.01812221   | 0.4508820   | 0.3509537   | 0.2414037   | 0.05651296  |             |
| 0.1419241    | 0.1304555    | 0.3543776   | 0.1047836   | 0.2343260   | 0.04855299  |             |
| 0.08105709   | 0            | 0.6208010   | 0.07764587  | 0.4466316   | 0.6682521   | 0.6981133   |
| 0.2948011    | 0.7763172    | 0.06376775  | 0.5131826   | 0.03230569  | 0.06072929  |             |
| 0.04846725   | 0            | 0.1352366   | 0           | 0.1684578   | 0.2386111   | 0.2233158   |
| 0.04433099   | 0.1102807    | 0.3174574   | 0.9091474   | 0           | 0.1267567   | 0.03503191  |
| 0.1723107    | 0            | 0.08337443  | 0.2424335   | 0.07627025  | 0.02004412  | 0.1617224   |
| 0.7542628    | 0            | 0.03390778  | 0.6715850   | 0.1298      | 0.06914443  | 0.2337860   |
| 0.1949448    | 0.1182701    | 0.2071130   | 0.03478033  | 0.08398545  | 0.5942828   | 0.10976     |
| 1.21079      | 3.0807       | 0.08062603  | 0.3268725   | 0.05748559  | 0           | 0.05040584  |
| 0.2858472    | 0.04301845   | 0.2664214   |             |             |             |             |
| TCGA-4Z-AA86 | 311          | 1           | 0.06899208  | 0.07377886  | 0.125103285 | 0.255266194 |
| 0.088231213  | 20.935697336 |             | 0.08012348  | 0.183861004 | 0.272801372 | 0.31660443  |
| 0.034087376  | 1.33795066   | 0.21575784  | 0.660730684 | 0.06835229  | 0.256837873 |             |
| 0.054441162  | 0            | 0.275509078 | 0.047956259 | 0.113230057 | 0           | 1.447323727 |
| 58.47573093  | 0.100583583  | 0.655171943 | 0.529387278 | 0           | 0.727907508 | 0.632239664 |
| 0.571441408  | 0.02875684   | 0.247047396 | 0.536192556 | 0.087291472 | 0.073556969 |             |
| 0.0332080    | 0.18687826   | 0.063658751 | 0.042781576 | 0.169194338 | 0.080452935 |             |
| 0.059399374  | 0            | 1.486789803 | 0           | 0.06496067  | 0.057110782 | 0.416892482 |
| 0.599453241  | 2.398960245  | 0.214138644 | 0.767995167 | 0.660743972 | 0.061297474 |             |
| 0.230370728  | 0            | 0.126054731 | 0.377433522 | 0.04076282  | 0.116188562 | 0.154064203 |
| 0.02470474   | 0.091238381  | 0.110397708 | 0           | 0.106743883 | 1.225670227 | 0.056083931 |
| 0.086270519  | 0.176633813  | 0.244113948 | 0.418080209 | 0.705849704 | 0.130441025 |             |
| 0.089441186  | 0.057598333  | 0.169981288 | 0.164187968 | 0.026004989 | 0.102226509 |             |
| 0.305994362  | 0.207708639  | 0           | 0.089220948 | 0.128008857 | 0.804288833 | 0.178198122 |
| 0.167232084  | 0.285054688  | 0           | 0.14671281  | 0.035953976 | 0.009385597 | 0.483265318 |
| 0.148228438  | 0            | 0.344178104 | 0.987121273 | 0.191888629 | 0           | 0.277770497 |
| 0.571441408  | 0.471852584  | 0.238902977 | 0.089407629 | 0.169514003 | 0.104019956 |             |
| 0.745377288  | 0.090836369  | 0.067656133 | 0.203088785 | 0.874225385 | 0           | 0.153821964 |
| 0.028498351  | 0.077459041  | 0.1014842   | 0.030822549 | 1.066423882 | 0.332757718 | 0           |
| 0.027220581  | 0.180510493  | 1.506555702 | 0.074240766 | 1.658148627 | 0.185285547 |             |
| 1.859831895  | 0.218372252  | 0.580253671 | 0.384020393 | 0           | 0.817502294 | 0           |
| 0.082256813  | 0.120778727  | 0.455291537 | 0.158302215 | 0.150416312 | 0.891211974 | 0           |
| 0.025123464  | 0.256998518  | 0           | 0.139062927 | 0.252303724 | 0.032807099 | 0.182034924 |

0.547903497 0.042350982 0.125424063 0.081935317 0.707636666 0 1.119456561  
0.396572671 0.042132114 0 0.46337842 0.370571095 0.144501342 0.276618574  
0.524975718 0.367094818 0.202800102 0.112708259 0 0.252181779 0.168342031  
0.409823688 0.173643537 0.021244467 0.966880916 0.034914621 0.182458199  
0.723065551 0.318799164 0.388878696 0.207143189 0.100484749 0.371871344  
0.71670893 0.087819362 0.049786651 0.720975055 0.290126836 0.593633307  
0.75940592 0 0.340896171 0.307198067 0.660332293 0.095129102 0.059725744  
0.301946818 0.14913227 0.067440874 0.287258372 0.163459932 0.09399516 0  
0.092206191 0 0.032675608 0.187955368 0.561036668 0.293786093 0.106337792  
0.772191862 0.203948279 0.971828831 0.126888157 0.170377515 0.249556046  
0.061761849 0.056911442 0.042908232 0.305195472 0.331096145 0.305427473 0  
0.298492049 0.216576655 0.221572485 0.788270569 0.133648592 0.195590414  
0.088454583 0.145026553 0.252792685 0.085209708 0.055648902 0 0.008435141  
0 1.369898063 0.020984721 0.095129102 1.478331621 0.182078483 0.092428818  
0.194108669 0.489034568 0 0.099542907 0.272106441 0.526916171 0.047124648  
0.578079726 0.09238033 0.605073116 3.942752851 0.14325893 0.64193418  
0.04838317 0.152384375 0.155556296 0.02185674 0.196842594 0 0.104109365  
TCGA-5N-A9KI 76 1 0.042059578 0.044977738 0.3050664 0.207490259  
0.430306502 23.212724075 0.244228015 0.448348056 0.12792896 0.096505633  
0.027707541 1.494433865 0.338225791 0.597704169 0.037881403 0.27587171  
0.099566747 0.605019768 0.335916689 0 0.023009445 0.115247307 2.22087529  
27.342748847 0.096818963 0.331587209 0.258183901 0.10065904 1.242510025  
0.750577485 0.510938702 0.105186034 0 0.208013637 0.207260055 0.074737445  
0.769293376 0.085444815 0.160407333 0.345571827 0.077756055 0.043596843  
0.144846342 0 3.122011006 0.088949264 0.29041403 0.121857376 0.508299556  
0.255810888 2.544470291 0 0.828340017 0.161123495 0 0.426523588  
0.179748286 0.116207097 1.196491135 0 0.047221284 0.187844035 0.210850186  
0.285186959 0.145820247 0.084059875 0.357907961 0.588706345 0.006216435  
0.112699322 0.148525666 0.123160519 0.509747703 1.333950157 0 0.806984021  
0.046818158 0.06376956 0.153990398 0 0.498562016 0 0.177275316 0  
0.027195842 0.092670031 0.267446104 0 0.05097477 0 0 0.04878567  
0.109592946 0.025747797 0.227767716 0.325311716 0.336951871 0.492098124  
1.439968375 0.128514214 0 0.04321774 0.812817461 1.11477535 0.319616727  
0.109231651 0.126223241 0.439197826 0.06341359 0.40391437 0.083064737 0  
0 2.815601878 0 0.234435854 0.004963835 0 0.371206315 0.187903217  
0.540978267 0.115919303 0.152924311 0.033188916 0.08659235 1.081201706  
0.045259329 0.571353173 0.135546548 0.84540217 0.118334288 1.768697545  
0.54497737 0 1.80728731 1.520886588 0.14486664 0.073630224 0.104084609  
0 0.293434102 0.703831766 0.039366654 0 0.104449179 0.042753033  
0.169553607 0.192264607 0 0.06341359 0.585140851 0 0.076462155 0  
0.071899314 0 0.652781386 0.281766053 2.054796941 0 0.423733437  
0.322729877 0.090140876 0.712013285 0.150607276 0.372986124 0.049453135  
0.114517053 0.195142679 0.40356053 0 0 0.261116768 0.025902489  
0.285788469 0.042569937 0.070783888 0.396721605 0.515908891 0.033867394

|              |             |             |             |             |             |             |            |          |  |
|--------------|-------------|-------------|-------------|-------------|-------------|-------------|------------|----------|--|
| 0.108240438  | 0.104499665 | 0.418529693 | 0.436926602 | 0.178457454 | 0.03035139  |             |            |          |  |
| 0.338097966  | 0.212243705 | 0.193011266 | 1.474600365 | 0           | 0.216969535 | 0.163267018 |            |          |  |
| 0.603836648  | 0.092789547 | 0.254873851 | 0.251012126 | 0.151525613 | 0.063252181 |             |            |          |  |
| 0.078412413  | 0           | 0.10351362  | 0           | 2.791841565 | 0.131222181 | 0.039840001 |            |          |  |
| 0.057291529  | 0.54210846  | 0.107460327 | 0.12965322  | 0.86907805  | 0.065438316 |             |            |          |  |
| 0.323157333  | 0.044202691 | 0.062320252 | 1.269755646 | 0.075303638 | 0           | 0           |            |          |  |
| 0.363322018  | 0.158829511 | 0           | 0.088160357 | 0.22746179  | 0.226339587 | 0.150968444 |            |          |  |
| 0.285734013  | 0.108634756 | 0.021679564 | 0.035949657 | 0.101042747 | 0           | 0.067224643 |            |          |  |
| 0.067850377  | 0           | 0           | 0.977712807 | 0.076757376 | 0.046394773 | 0.212055044 |            |          |  |
| 0.122100371  | 0.091825221 | 0.142649553 | 0.276315324 | 0           | 0           | 0.212538873 |            |          |  |
| 0.107074473  | 0.057457111 | 1.794563134 | 0.028158867 | 1.630794408 | 4.996681174 |             |            |          |  |
| 0.059755395  | 0.245986237 | 0           | 0.061931964 | 0.060347408 | 0.026649009 | 0.453336991 |            |          |  |
| 0.039240386  | 0.048821612 |             |             |             |             |             |            |          |  |
| TCGA-GU-AATO | 324         | 1           | 0           | 0.07362061  | 0.2496699   | 0.08490623  | 0          | 50.25396 |  |
| 0.07995162   | 0.1834666   | 0.2093971   | 0           | 0.02267617  | 1.0058830   | 0.06151287  |            |          |  |
| 1.2760910    | 0.04960413  | 0.1952663   | 0.1629732   | 0           | 0           | 0.0410172   | 0.1129872  |          |  |
| 0            | 1.96538331  | 4.29050     | 1.479105    | 0.02467044  | 0.1056504   | 0.08238053  |            |          |  |
| 0.4358077    | 1.4277890   | 4.561726    | 0           | 0.0493035   | 0.2918414   | 0.1100264   |            |          |  |
| 0.1957312    | 0.1988206   | 0.0582742   | 0.2710281   | 0.05336227  | 0.08311701  |             |            |          |  |
| 0.05352025   | 0.4741757   | 0.2123348   | 4.9123670   | 0.1296427   | 0.0997295   |             |            |          |  |
| 1.8488810    | 2.990837    | 2.5884340   | 1.221025    | 0.5305485   | 0.08114791  | 0           |            |          |  |
| 0.5789485    | 0           | 0.04908658  | 1.1298720   | 0.0772929   | 0.2049783   | 0.1479105   |            |          |  |
| 0.1158725    | 0.09180076  | 0           | 0.6390896   | 0.07412371  | 0.06105124  | 0.0491917   |            |          |  |
| 0.07293308   | 0.06719734  | 0.1787929   | 1.1973710   | 0.04338708  | 0.1070992   |             |            |          |  |
| 0.03831653   | 0.05218975  | 0.07561652  | 0           | 0.4420314   | 0           | 0.2487158   | 0          | 0        |  |
| 0.1117675    | 0.5836827   | 0           | 0.2503101   | 0           | 0           | 0           | 0.07024099 |          |  |
| 0.2026171    | 0           | 0           | 0.2322543   | 1.5478630   | 0.07011836  | 0.04709162  | 0          |          |  |
| 0.05543494   | 5.6261280   | 5.754717    | 0.05959764  | 0.08452029  | 0.4863074   | 0           |            |          |  |
| 0.3099077    | 0.1359623   | 0.06751102  | 0           | 4.5428050   | 0.07602876  | 0.3837301   |            |          |  |
| 0.08937414   | 0           | 0.2025331   | 0           | 0.4142624   | 0           | 0           | 0.04724546 |          |  |
| 0.6850592    | 0           | 1.1510210   | 0.07395525  | 0.9225160   | 1.0422160   | 0.05025531  |            |          |  |
| 0.09038975   | 0.6454277   | 0.2667239   | 0.1459207   | 0           | 0           | 0           | 0.3001874  |          |  |
| 0.6467639    | 0           | 0           | 0.05698829  | 0           | 1.3182640   | 0.6923470   | 0.05189842 |          |  |
| 0.08779579   | 0.1690406   | 0           | 0.3270383   | 0.1765297   | 0           | 0.8742173   |            |          |  |
| 1.1615440    | 2.522505    | 0.2599066   | 0.1155961   | 0.4226014   | 0.1676644   |             |            |          |  |
| 0.5929431    | 0           | 0.3663074   | 0           | 0.1874442   | 0.03992676  | 0.5190093   | 0          |          |  |
| 0.1752620    | 1.039627    | 0.1271934   | 0.05847316  | 0           | 0.09930919  | 0.1443029   |            |          |  |
| 0.3933063    | 0.05543494  | 0           | 0.04718551  | 1.5318680   | 0.3575858   | 0.175262    |            |          |  |
| 0.04967986   | 0.8854506   | 0.05790091  | 0.4738880   | 0.5372599   | 0.03043995  |             |            |          |  |
| 0.1155277    | 0.1964995   | 0.3801438   | 0           | 0           | 0.6025983   | 0.1488124   |            |          |  |
| 0.04141306   | 0.2053556   | 0           | 0.1422031   | 0           | 1.5028040   | 0.5369688   | 0.06521104 |          |  |
| 0            | 0.3974816   | 0.05863119  | 1.2733170   | 0.8298076   | 0.08568877  | 0.4114067   | 0          |          |  |
| 0.06800483   | 0.3495869   | 0.06162938  | 0.05678937  | 0           | 0.1055102   | 0.595778    |            |          |  |
| 0.1406642    | 0.1443029   | 0           | 0.1852390   | 1.040458    | 0.2125891   | 0           | 0          | 0        |  |

|              |            |            |             |            |             |            |            |            |
|--------------|------------|------------|-------------|------------|-------------|------------|------------|------------|
| 0.04134728   | 0          | 0.03000951 | 0           | 0          | 0.0336682   | 0          | 0.2667239  | 0.04187942 |
| 0.03797002   | 0          | 0.09084397 | 0.01366379  | 0.06898631 | 0.1428251   | 0          | 0          |            |
| 0.1866719    | 0.05842067 | 0.04702357 | 0.9818550   | 0.04609109 | 3.7497627   | 6.74784    |            |            |
| 0.02257131   | 0.3660327  | 0          | 0           | 0.0846669  | 0           | 0.2182449  | 0          | 0.06392988 |
| TCGA-FD-A6TG | 93         | 1          | 0.02474426  | 0.1323053  | 0.04486874  | 0.2746564  |            |            |
| 1.46197323   | 6.75750    | 3.879437   | 0.1438743   | 0          | 0.8516349   | 0.01222556 |            |            |
| 3.2711060    | 0.06632771 | 0.2981279  | 0.06685853  | 0.3794295  | 0.08786483  |            |            |            |
| 0.0638374    | 1.4282870  | 0.04422776 | 0.08122073  | 0.1525537  | 2.10803725  | 1.13418    |            |            |
| 0.08543999   | 0.05320297 | 0.22784    | 0.04441437  | 3.916      | 2.1124020   | 4.918788   |            |            |
| 0.03094123   | 0.1594880  | 0.02622373 | 0.7217179   | 0.02638147 | 0.6074186   |            |            |            |
| 0.1445217    | 0.2191818  | 0.03452347 | 0.1526390   | 0.1442737  | 0.09586709  |            |            |            |
| 0.08585813   | 1.6352770  | 0.2747332  | 0.1630886   | 0.1152168  | 0.2492      | 0.09674822 |            |            |
| 3.0113850    | 0.06582994 | 0.8898967  | 0.4046858   | 1.0552590  | 0.2019680   | 0.06344911 |            |            |
| 0.4090952    | 0.8122073  | 0          | 0.1666858   | 0.2762784  | 0.1329067   | 1.045945   |            |            |
| 0.1253827    | 0.2596316  | 0.2297045  | 0.7193308   | 0          | 0.1856474   | 0.5177253  |            |            |
| 0.1539714    | 1.1567261  | 7.467730   | 0.04678314  | 0.2694586  | 0.6094065   | 0.1406871  |            |            |
| 0.3261412    | 0          | 0.3116432  | 0.04703399  | 0.3799268  | 0           | 0.09599824 |            |            |
| 0.1635574    | 0          | 0.0319557  | 0           | 0          | 0.1219806   | 0.01934253 | 0.3433502  |            |
| 0.1966292    | 2.2009341  | 5.858691   | 7.210650    | 7.586455   | 0.2064646   | 0.07616647 | 0          |            |
| 4.4232780    | 4.918788   | 0.5641054  | 0.5141005   | 0.1063253  | 0.2849850   | 1.1399017  |            |            |
| 0.5569422    | 0.1954727  | 0.2183860  | 0.06243302  | 1.11811    | 0           | 0.3723894  | 0          |            |
| 0.04167144   | 0.2547837  | 0.1326554  | 0.8794173   | 0          | 0.06747568  | 0.02928828 |            |            |
| 0.07641529   | 2.2263030  | 0.2973505  | 0           | 0.5634182  | 0.02610666  | 5.89992    |            |            |
| 0.5215688    | 0          | 0.7056135  | 1.1983390   | 0.05572543 | 0.06497659  | 0.2755552  |            |            |
| 0.08516349   | 0.1618420  | 5.666281   | 0           | 0.08109558 | 0.2765203   | 0.5659251  |            |            |
| 0.03740656   | 0.4072034  | 0          | 0.1119214   | 0.4001869  | 0.04556799  | 0.3373784  |            |            |
| 0.04407959   | 0.09517366 | 0.06533958 | 0.6807994   | 0.8748816  | 0.090665    |            |            |            |
| 0.02802504   | 0.4362549  | 0.5126399  | 0.5423643   | 2.1109740  | 1.19936     | 0.7570443  |            |            |
| 0            | 0.06063483 | 0.08610394 | 0.1695861   | 0.2070051  | 0           | 0.2242004  |            |            |
| 0.01142911   | 0.5674505  | 0          | 0.2409356   | 0.1944975  | 0.3180688   | 0.02988702 |            |            |
| 0.2547176    | 0.07313841 | 1.0002970  | 0.3470178   | 0.03149673 | 0.08035272  |            |            |            |
| 1.0741030    | 2.185156   | 0.08516349 | 0.2161616   | 0          | 0.2468341   | 0.3940971  |            |            |
| 1.8445460    | 0.08188414 | 0.1285251  | 0           | 0.3209209  | 0.06140008  | 0.1107148  |            |            |
| 0.04396912   | 0.05219876 | 0          | 1.0251730   | 0          | 0           | 0.9084984  | 0.821866   |            |
| 0.3432459    | 0.4793355  | 0.1154949  | 0.6126028   | 0.05851143 | 0.09165976  |            |            |            |
| 6.2093520    | 0.06123448 | 0          | 0.7860395   | 0.3212058  | 0           | 0          | 0.04014572 |            |
| 0.1331588    | 0.4908303  | 0.9570321  | 0.4314019   | 0.0765264  | 0.4124192   |            |            |            |
| 0.04458368   | 0          | 0.1563992  | 0.07983471  | 0.4144176  | 0.009075881 | 0.2004111  |            |            |
| 0.6830530    | 1.128937   | 0          | 0           | 0.1175456  | 0.0589332   | 0.3919576  | 0.308009   |            |
| 0.1324051    | 0.06426256 | 0.2607535  | 0.1259869   | 0.07605641 | 0.5514105   |            |            |            |
| 0.1739458    | 0.6167699  | 4.1482070  | 0.05678878  | 0.1184050  | 0.1093064   |            |            |            |
| 0.0380392    | 0.02351699 | 0.1764958  | 0.008657132 | 0.1292511  |             |            |            |            |
| TCGA-4Z-AA7O | 512        | 0          | 0.1072008   | 0.3668433  | 0           | 0.2379815  | 0          | 54.32535   |
| 0.07469812   | 0.1714113  | 0.2347655  | 0.1475832   | 0          | 0.6792103   | 0.1149419  |            |            |

|                                   |                    |                           |                   |                    |            |                       |
|-----------------------------------|--------------------|---------------------------|-------------------|--------------------|------------|-----------------------|
| 1.0730170.1042756                 | 0.01520297         | 0.2030193                 | 0.1206833         | 0.3736053          |            |                       |
| 0.03832202                        | 0.1055630.3524885  | 1.17732693.718290.1579332 | 0                 | 0.09870823         |            |                       |
| 0.07696743                        | 0                  | 0.9306776                 | 0.2130991         | 0                  | 0.09212768 | 0.3635532             |
| 0.1027967                         | 0.0457175          | 0.1857564                 | 0.1960023         | 0.06330481         | 0.02991355 |                       |
| 0.03882776                        | 0.3000211          | 0.1107546                 | 0                 | 6.4685390.1360274  | 0.1211240  |                       |
| 1.1228060.6147493.6820770.2281586 |                    | 0.9362976                 | 0.09476975        | 0                  | 0.5090886  |                       |
| 0                                 | 0.0210197          | 0.3518766                 | 0                 | 0                  | 0.3830190  | 0.003093106 0.2229985 |
| 0.06427513                        | 0.8458859          | 0.6232784                 | 0.02851983        | 0.2412868          | 0.05678396 |                       |
| 0.5022552                         | 0.7238604          | 12.897880.08107236        | 0.01667698        | 0.008949701        |            |                       |
| 0.1462813                         | 0.02354929         | 0.1454648                 | 0.2223772         | 0                  | 0.2711018  | 0                     |
| 0.1663592                         | 0.1193411          | 0                         | 0.05537729        | 0.1559084          | 0          | 0                     |
| 0.06703889                        | 0.008750075        | 0.2953134                 | 0                 | 0                  | 0.3231814  | 1.4132880.03023584    |
| 0                                 | 0                  | 0.05179239                | 1.9178920.7331705 | 0                  | 0.05264439 | 0.3555805 0           |
| 1.0616620.2117140                 | 0                  | 2.42971                   | 0.07103303        | 0.2151094          | 0.04554627 |                       |
| 0.2166423                         | 0.06307497         | 0.1724129                 | 0.2515772         | 0.3545438          | 0          | 0.1522644             |
| 0.1820818                         | 1.4934380.1557309  | 0.2912511                 | 0.06909576        | 0.7272271          |            |                       |
| 0.09048254                        | 0.1622890.8451559  | 0                         | 1.03853           | 0                  | 0.1306519  | 0                     |
| 0.07379159                        | 0.44874            | 0.6609160                 | 0                 | 0                  | 0.06538094 | 0.2592933 1.352513    |
| 0.1835139                         | 0                  | 0.5816450.07896658        | 0.1169313         | 0.07638727         | 0.05497674 | 0                     |
| 0.8167738                         | 0.4734541          | 0                         | 0.09713142        | 0.3240014          | 0.2961247  | 0.4950059             |
| 0.1814768                         | 0.0575798          | 0.5703965                 | 0.0756272         | 0.08756375         | 0          | 0.367353              |
| 0.1345227                         | 0.1091639          | 0.04316952                | 0.01980595        | 0.4097323          | 0.06510093 |                       |
| 0.03092791                        | 0.2696420.3674627  | 0.3107544                 | 0.2207052         | 0.06061691         |            |                       |
| 1.0134040.06681788                | 0                  | 0.09283095                | 0.5170431         | 0.1081927          | 0.1475832  |                       |
| 0.3596113                         | 0                  | 0.5156970.4112366         | 0.1183884         | 0.0532126          | 0.05568157 |                       |
| 0.1791372                         | 1.2976520.07738373 | 0.3357585                 | 0.1523917         | 0.04240186         | 0          |                       |
| 0.1146169                         | 0.2006742          | 0                         | 0.08761422        | 0.2432171          | 0.4930076  | 0.5948244             |
| 0.9414140.06004372                | 0.6955335          | 0                         | 0.03176817        | 0.5055837          | 0          | 0.05305783            |
| 0.08000562                        | 0.07617337         | 0.3643398                 | 0.1314213         | 0.0674105          | 0          | 0                     |
| 0.9113351.4333760.08306594        | 0.2652313          | 0                         | 0.07726083        | 0                  | 0.149534   |                       |
| 0.06917437                        | 0.1196934          | 0.01572795                | 0.2805118         | 1.3082890.07825517 |            |                       |
| 0.08868767                        | 0.08107236         | 0.1018497                 | 0.0319149         | 0.2131917          | 0.578241   |                       |
| 0.1912084                         | 0                  | 0.2378263                 | 0.4366554         | 0.04393372         | 0.37458    | 0.04306251            |
| 1.8407544.5992510.1476173         | 0                  | 0                         | 0.1894214         | 0.01318393         | 0          | 0.2242948             |
| 0                                 | 0.08959372         |                           |                   |                    |            |                       |
| TCGA-GV-A3QI                      | 1110               | 0                         | 0.6481213         | 0.08943083         | 0          | 0.2320651 0           |
| 40.107790.03642054                | 0.1063681          | 0.09538714                | 0.5756567         | 0.1756054          |            |                       |
| 0.03749008                        | 0.1681266          | 0.6588071                 | 0.02259628        | 0.04632817         | 0.04949302 |                       |
| 0.01471038                        | 0.1138492          | 1.6504780.5833188         | 0.1718627         | 3.63551336.73743   |            |                       |
| 1.0732350.37086                   | 0.3850172          | 0.1501080                 | 2.7377470.5195033 | 0.1307157          |            |                       |
| 0.2245933                         | 0.5760870.1002412  | 0.1114523                 | 0.5434153         | 0.2866944          |            |                       |
| 1.0147040.1312645                 | 0.2472893          | 0.1219010.4860053         | 0                 | 2.1025760.6963901  |            |                       |
| 0.2362257                         | 0.07139            | 0.3790013                 | 1.3351749.20685   | 0.3893513          | 2.282552   |                       |
| 0.1478620.1114523                 | 0.4343783          | 1.0722                    | 0.01956545        | 4.6322380          | 0.2112564  |                       |

|                   |                           |                    |                           |                   |            |            |
|-------------------|---------------------------|--------------------|---------------------------|-------------------|------------|------------|
| 0.1167178         | 0                         | 0.007540523        | 0.08084854                | 0.4700791         | 0.6307728  | 0.2363602  |
| 0.0139054         | 0.1400525                 | 0.2048775          | 0.4132425                 | 0.6515675         | 1.732577   |            |
| 0.7708044         | 0.1057055                 | 0.008727207        | 0.3090635                 | 0                 | 0.1891312  | 1.657344   |
| 0.1987019         | 0.3398941                 | 0                  | 0.1419455                 | 0.1527411         | 0.06647157 | 0.4860053  |
| 0.1140243         | 0                         | 0                  | 0.1879419                 | 0.08171533        | 0.01706509 | 0.1402939  |
| 0.3773168         | 0                         | 0.4434567          | 1.8108290.002457013       | 0.1501623         | 0.2577941  |            |
| 0.1262620.9351059 | 0.4766290.1357432         | 0.1368950.6260594  | 0.118207                  |                   |            |            |
| 1.4587870.1238704 | 0.03075345                | 0.1055029          | 2.0918880.06926711        | 0.2796823         |            |            |
| 0.01850582        | 0.3873035                 | 1.1071240.6444853  | 0.1462502                 | 0.4321621         | 0          |            |
| 0.07423954        | 0.1291313.9788480.2024791 | 0.8083374          | 0.2021341.1589320         |                   |            |            |
| 0.5011389         | 0.6524480.04117545        | 0.8657053          | 0.1215013                 | 0.3489758         |            |            |
| 0.2196024         | 0.2586939                 | 0.4677211          | 1.9964774.0878780         | 0                 | 0.88264    |            |
| 0.03187777        | 0.3792706                 | 3.4979220.05965055 | 0.6383179                 | 1.0034810.8855395 |            |            |
| 0.7696641         | 0.4469295                 | 0.6969298          | 0                         | 0.4424824         | 0.5784016  | 0.153211   |
| 0.28415           | 0.6582221                 | 1.8769590.3146714  | 0.1164244                 | 0.8141509         | 0.5284054  |            |
| 0.3318618         | 0.1536964                 | 0.1273155          | 1.93439                   | 0.06558921        | 0.4258     | 0.2262676  |
| 0.2221060.1198638 | 0.03174124                | 0.2412722          | 0.9202849                 | 0.4479092         |            |            |
| 0.3787861         | 0.08070686                | 0.1773298          | 2.6569                    | 0.09773513        | 0          | 0.04526156 |
| 0.05041891        | 0.2373816                 | 0.2518498          | 0.8547609                 | 0.08319828        | 0.3742336  |            |
| 1.1171080         | 0.1816140.1357432         | 0.1622063          | 0.4293294                 | 0.1980823         |            |            |
| 0.3235136         | 0.03715078                | 0.1516083          | 0                         | 0.1397093         | 0.2935279  | 0.02970573 |
| 0.08543609        | 0.1364368                 | 0.4807512          | 0.5155882                 | 3.2400351.10271   | 1.561742   |            |
| 0.1895123         | 0.1084244                 | 1.0449290.05614834 | 0.1810857                 | 0                 | 0.01966226 |            |
| 0.3503477         | 0.06407706                | 0                  | 0.3052825                 | 0.02812744        | 0.5095091  | 1.4623020  |
| 0.2263078         | 0.05360998                | 0.6215557          | 0.2872706                 | 0.08657856        | 0.8094559  | 0          |
| 0                 | 1.2113833.2805360.1144646 | 0.02594486         | 0.4348127                 | 0.5379707         |            |            |
| 0.03734578        | 0.4496262                 | 0.45543            | 0                         | 0.07239639        | 0.4445016  | 0.2129     |
| 0.1285245         | 2.91096                   | 0.02099598         | 1.5923328.4842510.3872872 | 0.1500657         | 0          |            |
| 0.2308904         | 1.84486                   | 0.03974038         | 1.0438852.05542           | 0.1383301         |            |            |
| TCGA-DK-A6AV      | 1952                      | 0                  | 0.1618602                 | 0.04327257        | 0          | 0.1871475  |
| 39.868850         | 0.07352566                | 0.2584659          | 0.1392704                 | 0.03998566        | 0.1934953  |            |
| 0.3254032         | 0.9375723                 | 0.1093358          | 0.04303995                | 0.09579203        | 0.2942048  |            |
| 0.04407022        | 0.0482180                 | 0.5821101          | 3.26445518.394290.1304078 | 0                 |            |            |
| 0.09314842        | 0                         | 0                  | 1.1417330.1340641         | 0.1517974         | 0          | 0.1286534  |
| 0.07275498        | 0.08628485                | 0.3505871          | 0.07192979                | 0.08214129        | 0.04704774 |            |
| 0.08473175        | 0.01572901                | 0                  | 0                         | 5.9007210         | 0.1143016  | 0.03768351 |
| 0.5705340.2109538 | 2.3336130.1076537         | 0.1559223          | 0.2325226                 | 0                 |            |            |
| 0.9458147         | 0.7263218                 | 0.02344225         | 1.9923410                 | 0.2044398         | 0.6325291  | 0          |
| 0.005837768       | 0.1079169                 | 0                  | 1.0799730.2614097         | 0.01794228        | 0.5855043  |            |
| 0.02143423        | 0.1925484                 | 0.9983599          | 8.4454560.0765059         | 0.01573764        | 0          |            |
| 0.1610489         | 0.15556                   | 0.2287856          | 0.1498940                 | 0.6213059         | 0          | 0.07849442 |
| 0.2674703         | 0.2573068                 | 0.05225813         | 0.3678168                 | 0                 | 0          | 0.08213824 |
| 0.09489431        | 0.03715749                | 0.3072622          | 0.1043262                 | 0                 | 0.6055991  | 1.922986   |
| 0.004755464       | 0.04151912                | 0                  | 0.0977503                 | 1.1395450.4151245 | 0.1050905  |            |



|              |            |            |            |            |             |             |
|--------------|------------|------------|------------|------------|-------------|-------------|
| 0.0413993    | 0.1118507  | 0.09151423 | 0.3460981  | 0.1598313  | 0           | 0           |
| 3.1200240    | 0.1340641  | 0.1353288  | 0.03581737 | 0.1362932  | 0.5357      | 0.05423386  |
| 0.1460966    | 0.5855043  | 0          | 0          | 0.08330951 | 2.0636460   | 0.03265761  |
| 0            | 0.6672026  | 0          | 0.3062959  | 0.7975518  | 0           | 0.6006661   |
| 0.1876196    | 0.1062582  | 0.1001386  | 0.06963522 | 0.2646652  | 0.2851152   | 0           |
| 0            | 0          | 0          | 0.1835163  | 2.3861850  | 0           | 0.1337024   |
| 0.1037603    | 0          | 0.8564093  | 1.4959810  | 0.3666417  | 0.1019173   | 0.4657421   |
| 0.5026021    | 0.1442147  | 0          | 0.3767880  | 0.0495790  | 0.0704042   | 0.3743945   |
| 0.2115760    | 0.1030151  | 0.05092246 | 0.07476146 | 0.1546615  | 0           | 0.1167435   |
| 0.5089084    | 0.3161682  | 0.1466254  | 0.3124107  | 0.1352062  | 1.459652    |             |
| 0.3783259    | 0.1030151  | 0.1314033  | 0          | 0.1531479  | 0.2785409   | 0.2333072   |
| 0.0268379    | 0.2791635  | 0.2356160  | 0.08937605 | 0.2343384  | 0.2101811   | 1.593873    |
| 0.08746863   | 0.02738439 | 0.3545665  | 0.1438081  | 0.1093704  | 0           | 0.7030467   |
| 0.09468552   | 0.1149888  | 0.08267929 | 0.2616008  | 0.2067727  | 0.6236894   |             |
| 0.3658069    | 0.07554895 | 0.2763609  | 0.03189518 | 0          | 0.5193281   | 0           |
| 0.1502079    | 0.07549924 | 0.09725326 | 0.8786463  | 0.1240189  | 0.06361355  |             |
| 0.1969545    | 0.1088794  | 0.8829368  | 1.4119940  | 0.1877189  | 0           | 0.1822726   |
| 0            | 0.1763893  | 0.03263904 | 0.2259032  | 0          | 0.3277384   | 0.5879039   |
| 0.03347691   | 0.2295177  | 0.1441694  | 0.02409382 | 0.1543967  | 0.2728356   |             |
| 0.2165261    | 0          | 0.2842788  | 0          | 0          | 0.7646742   | 0           |
| 0.09950189   | 0.06454378 | 0          | 0.3575042  | 0.0373240  | 0.1924193   | 0           |
| 0.1831858    |            |            |            |            |             |             |
| TCGA-DK-A1A3 | 665        | 1          | 0.04927087 | 0.0878156  | 0.1191238   | 0.1063411   |
| 0.05040843   | 40.565730  | 0.1144408  | 0.2029256  | 0.08991775 | 0.1130519   | 0           |
| 0.8540607    | 0.2641440  | 0.1826564  | 0.05325159 | 0.07860918 | 0.07775858  |             |
| 0.02311151   | 0.6439271  | 0          | 0          | 0.1350069  | 1.06515639  | 1.95050     |
| 0.01765633   | 0.3024506  | 0          | 0.1039674  | 0.7366832  | 0.2176514   | 0.04107354  |
| 0.2822872    | 0.1044336  | 0.2362336  | 0.08755149 | 0.1897246  | 0.1167771   |             |
| 0.04849286   | 0.0534670  | 0.1747396  | 0          | 0          | 0.03799135  | 0.7314585   |
| 0.1855673    | 0.07137516 | 0.2646443  | 0.08562021 | 4.0253790  | 0.04369361  |             |
| 0.4218967    | 0.3339402  | 0          | 0.1462398  | 0.08422675 | 0.03659443  | 0.3773631   |
| 0.05822174   | 0          | 0.03667511 | 0          | 0.04738772 | 0.008760089 | 0.1477084   |
| 0.2668099    | 0.7957413  | 0.01456454 | 0.07041178 | 0.1652915  | 0.1322538   |             |
| 0.7251059    | 0.4536759  | 0.03105159 | 0.05109972 | 0.03427833 | 0.1494062   |             |
| 0.1262749    | 0.03714306 | 0.3163564  | 0          | 0.1483356  | 0.4019624   | 0.06371736  |
| 0.2399718    | 0.1044336  | 0.08484042 | 0.1791438  | 0          | 0           | 0.009525029 |
| 0.02567662   | 0.08043297 | 0.2088152  | 0.04234308 | 0.06578728 | 0.6118367   |             |
| 0.6797782    | 0.1428281  | 0.6403549  | 0.1012552  | 0.1586964  | 0.2720642   |             |
| 0.1497665    | 0          | 0.2890083  | 0.07566178 | 0.03714306 | 0.3992348   | 0.06487102  |
| 0            | 0.04143896 | 0.9188256  | 0.05441284 | 0.2746308  | 0.03488943  | 0.05531757  |
| 0.09663359   | 0.1320720  | 0.4076634  | 0.2036912  | 0.08957191 | 0           | 0.05071948  |
| 1.5934370    | 0.02650961 | 1.1155230  | 0.3713812  | 0.0346558  | 0.5801455   |             |
| 0.2517697    | 0          | 0.6800556  | 1.2726060  | 0.07397381 | 0.04312721  | 0.2032172   |
| 0.1130519    | 0.1289042  | 0.9836219  | 0.09223246 | 0.2153038  | 0.203929    |             |

|              |            |            |            |            |            |             |            |
|--------------|------------|------------|------------|------------|------------|-------------|------------|
| 0.3004993    | 0.04965607 | 0.1351375  | 0.04685854 | 0          | 0.3370206  | 0.1814704   |            |
| 0.3582876    | 0          | 0.08422675 | 0          | 0.4866295  | 0.1915256  | 0.7221301   |            |
| 0.3720239    | 0.1654614  | 0.1512253  | 0.3983845  | 0.1097488  | 0.08821476 |             |            |
| 0.5680170    | 0.02683029 | 0.05715017 | 0.1800962  | 0.03434911 | 0.08362189 |             |            |
| 0.07440478   | 0.04551537 | 0.7951217  | 0          | 0.07107435 | 0.4131033  | 0.6126426   |            |
| 0.0793482    | 0.5494611  | 0.05487639 | 0.3813354  | 0.1023679  | 0.08362189 | 0           |            |
| 0.7129193    | 0.1657558  | 0.1695779  | 0.3099038  | 0          | 0.2725436  | 0.4500231   |            |
| 0.3083394    | 0.06793669 | 0.4691862  | 0.3332558  | 0.2840085  | 0.05186792 |             |            |
| 0.09798031   | 0.05836766 | 0.01948845 | 0          | 0.2633971  | 0          | 0.1400122   | 0          |
| 0.5308821    | 0.4196161  | 0.3037656  | 0.5090425  | 0.04599479 | 0.2804178  |             |            |
| 0.05178143   | 0.09734042 | 0.9185240  | 0.04410738 | 0.0812869  | 0          | 0.2745904   |            |
| 0.1472987    | 0.1006716  | 0.05163791 | 0.05329221 | 0.1325732  | 0.279241   |             |            |
| 0.2130064    | 0          | 0.05079323 | 0          | 0.1183669  | 0          | 0.05011401  | 0.02649453 |
| 0            | 0.2353427  | 0.5249501  | 0          | 0          | 0.8073415  | 0.1300318   | 0.05867402 |
| 0.3570022    | 0.01703635 | 0.02929396 | 0.02843553 | 0.07287206 | 0.4181094  | 0           |            |
| 0.5445936    | 0          | 0.1364572  | 3.0099150  | 0.02692335 | 0.05239302 | 0.2073178   | 0          |
| 0.0403967    | 0          | 0.01561951 | 0          | 0.04575382 |            |             |            |
| TCGA-GD-A6C6 | 67         | 0          | 0.1191905  | 0.09104294 | 0          | 0.09449936  | 0          |
| 0.1856324    | 0.2796670  | 0.0168255  | 0.05767289 | 0          | 3.0930320  | 0.009201443 |            |
| 1.36434      | 0          | 0.1517523  | 0          | 0.1623166  | 0.05589025 | 0.5598745   | 5.229083   |
| 93.546150    | 1.254264   | 0.1830522  | 0.07839152 | 0.2445022  | 0          | 5.297027    |            |
| 0.4513007    | 0          | 0          | 0.1443623  | 0.1632770  | 0.05446148 | 0.09834863  | 0.1470122  |
| 0.2765127    | 0.3801050  | 0.03661775 | 0          | 0.2198961  | 0.03938758 | 19.790240   |            |
| 0.3527098    | 0.08456948 | 0.4801480  | 0.3550675  | 7.2780340  | 0.04529941 | 0.08748039  |            |
| 0            | 0          | 1.3518951  | 1.8337660  | 0.0166933  | 4.0799880  | 0           | 1.6349880  |
| 0.04541017   | 0.2552282  | 0          | 0          | 0          | 0.09124939 | 0.03607708  | 0.199439   |
| 0.08844171   | 0.5226101  | 0          | 0          | 0          | 0          | 0           | 0.3465730  |
| 0.1845446    | 0          | 0.03302953 | 0.1007012  | 0          | 0.1759168  | 0.0619092   | 0          |
| 0.01975017   | 0          | 0          | 0.04209517 | 0          | 0          | 0.08066529  | 0.9396812  |
| 0            | 0          | 0.2056609  | 3.8924690  | 0.4269943  | 0          | 0.07664948  | 1.2080140  |
| 0.6898454    | 0          | 0          | 0          | 5.1171380  | 0.6833374  | 0.1507153   | 0.05735056 |
| 0.7012951    | 0.04564194 | 0.07300241 | 0          | 0.5571828  | 0          | 0.02629175  |            |
| 0.9177767    | 0          | 0.2846819  | 0.2194962  | 0.2566866  | 0          | 0.5155428   |            |
| 0.3449227    | 0.2012049  | 0.6518373  | 0.3298441  | 0.0225566  | 0          | 0.2949601   |            |
| 0            | 0.08909442 | 1.2447210  | 0          | 0.08456948 | 0.05192384 | 0.2574055   | 4.173540   |
| 0            | 0          | 0          | 0.2321595  | 0.06066479 | 0.4366110  | 0.2882936   | 0.0168991  |
| 0.06238911   | 0          | 0.04288559 | 0          | 0.1741675  | 0.1137822  | 0.09145677  |            |
| 0.3170959    | 0          | 0.05563269 | 0          | 1.2253170  | 0          | 0.2057047   | 0          |
| 0.1719350    | 0.05353567 | 1.2359830  | 0          | 0.08315156 | 1.4684430  | 0.3183902   |            |
| 0.04334755   | 0          | 0          | 0.0859238  | 0          | 0.7139848  | 0.06775843  | 0.1365177  |
| 0.04665621   | 0.07521678 | 0.09860683 | 0.04422086 | 1.8901070  | 0.2576404  | 0           |            |
| 0.03809296   | 0          | 0.1122482  | 0          | 0.3641031  | 0.07968511 | 0           | 0          |
| 0            | 0.5248823  | 1.0115220  | 0.2861110  | 0.3488682  | 0.02684223 | 0           | 0.1883242  |
| 0.04572839   | 0.1264115  | 0          | 0.02135115 | 0.1366371  | 0          | 0.3212140   | 0          |

|              |            |             |            |             |             |             |            |            |
|--------------|------------|-------------|------------|-------------|-------------|-------------|------------|------------|
| 0.1158014    | 0.3917186  | 0           | 0          | 0           | 0.4908684   | 0           | 0.02226676 | 0.02746825 |
| 0            | 0.0374722  | 0.1697335   | 0.5442427  | 0           | 0.01408669  | 0.06438557  |            |            |
| 0.3639888    | 0.01013839 | 0.02362484  | 0.08831232 | 0.0607411   | 0           | 0.06925436  |            |            |
| 0            | 0          | 1.0017240   | 2.3107121  | 0.0785250   | 0.01674769  | 0.4073890   | 0.1504336  | 0          |
| 0            | 0.08096776 | 0.005957214 | 0.01185883 |             |             |             |            |            |
| TCGA-GC-A3RD | 428        | 0           | 0.05798076 | 0.1705098   | 0.2102729   | 0.1877094   |            |            |
| 0.02224478   | 29.910320  | 0.2844504   | 0.1322663  | 0.5986654   | 0.04297041  |             |            |            |
| 0.2368193    | 0.1942739  | 1.3971470   | 0.1253304  | 0.1259101   | 0.03431415  |             |            |            |
| 0.1835802    | 0.1262930  | 0.1036345   | 0.02378956 | 0.1191547   | 3.73414633  | 0.3871      |            |            |
| 0.1334687    | 0.2181641  | 0.3336717   | 0.05203589 | 0.09175973  | 2.370023    |             |            |            |
| 0.09604756   | 0.1087523  | 0.03114269  | 1.1060540  | 0.1158308   | 0.1081799   |             |            |            |
| 0.2511712    | 0.3091961  | 0.06419837  | 0.03370643 | 0.1132055   | 0.2366435   |             |            |            |
| 0.3369537    | 0          | 6.28912     | 0.6897375  | 0.1091855   | 0.0179984   | 0.3503553   |            |            |
| 0.1133502    | 2.26809    | 0.03856319  | 1.0798390  | 0.0512573   | 0.07727135  | 0.9895261   |            |            |
| 1.0407180    | 0.01808664 | 3.0926430   | 0.09764455 | 0.2913191   | 0           | 0.002091177 |            |            |
| 0.1082409    | 0.08690985 | 0.1682011   | 0.2809227  | 0.006427198 | 0.3340248   |             |            |            |
| 0.1382052    | 0.2652837  | 0.9411254   | 1.4236660  | 0.1370279   | 0.01127492  | 0           |            |            |
| 0.08241451   | 0.06368452 | 0.1311271   | 0.4939876  | 0           | 0.6545917   | 1.086467    |            |            |
| 0.2811789    | 0.06555553 | 0           | 0.07487861 | 0.4743272   | 0           | 0.04354699  |            |            |
| 0.1260993    | 0          | 0.01774717  | 0.9470792  | 0           | 0           | 0.5399959   | 1.266582   |            |
| 0.01362783   | 0.1189822  | 0           | 0.03501564 | 0.5282616   | 0.6278608   | 0.112935    |            |            |
| 0.1720263    | 0.2804664  | 0.1311271   | 0.6394633  | 0.1145080   | 0.04264352  |             |            |            |
| 0.1828664    | 3.0046320  | 0.1440713   | 0.1454305  | 0.04105704  | 0.2441114   |             |            |            |
| 0.4264352    | 0.3496930  | 0.1341059   | 1.3782690  | 0.06862831  | 0.1044495   |             |            |            |
| 2.6924770    | 0.08188916 | 0.1817613   | 0.04671404 | 0.4188227   | 0.03058658  |             |            |            |
| 0.03657327   | 0.6110702  | 0           | 1.5854460  | 0.8423844   | 0.1612996   | 0           | 0.1076135  |            |
| 0.1995551    | 0.8343024  | 1.1489910   | 0          | 0.07199362  | 0           | 0.3506043   |            |            |
| 0.7553760    | 0.0413565  | 0.03278178  | 0.7209339  | 0.3203249   | 0.5929090   | 0.1549310   |            |            |
| 0            | 0.7976248  | 1.0106250   | 0.05311157 | 0.1313366   | 0.1460332   | 0.8008121   |            |            |
| 0.7667573    | 0.1420647  | 0.4282121   | 1.0412060  | 0.1533894   | 0.08287975  |             |            |            |
| 0.02521985   | 0.6059956  | 0.1212636   | 0          | 0.05837182  | 0.09373241  | 0.35088     | 0          |            |
| 0.1463675    | 1.0482180  | 0.3068878   | 0.1750782  | 1.1564060   | 0.2980486   | 0.5469094   |            |            |
| 0.1355221    | 0          | 0.06276085  | 0.2097365  | 0.3657327   | 0.1496663   | 0.7547      | 0          |            |
| 0.6810852    | 0.2581684  | 0.1600793   | 0.08394355 | 0.4893852   | 0.6920599   |             |            |            |
| 0.5326540    | 0.1504124  | 0.2648316   | 0.05151423 | 0.07453398  | 0           | 0.1356072   |            |            |
| 0.06783557   | 0.1647630  | 0.05923394  | 0.1821144  | 0.3333110   | 0.2680980   | 0.4492717   |            |            |
| 0.1894394    | 0.5444815  | 0.06855201  | 0          | 0.1572947   | 0           | 0.1793558   | 0          |            |
| 0.02423485   | 0.6842270  | 0           | 0.1411042  | 0.07800447  | 1.0515330   | 0.371515    |            |            |
| 0.05615896   | 0.1569021  | 0           | 0.3134055  | 0           | 0.08845942  | 0.4910555   |            |            |
| 0.08092196   | 0.0106333  | 0.4876650   | 0.8423844  | 0.1322663   | 0.05995968  |             |            |            |
| 0.3288669    | 0.1032873  | 0.03020769  | 0.2882680  | 0.1804317   | 0.1034173   | 0           |            |            |
| 0.5359629    | 0.03690158 | 0.1485129   | 0.8889411  | 0.1746814   | 1.405071    |             |            |            |
| 1.1752240    | 0.1900964  | 0.09248224  | 0.06099163 | 0.1280634   | 0.008913347 |             |            |            |
| 0.02755252   | 0.2619245  | 0           | 0.09085835 |             |             |             |            |            |

|              |            |            |            |             |            |            |
|--------------|------------|------------|------------|-------------|------------|------------|
| TCGA-BT-A20R | 154        | 1          | 0.1447873  | 0.1407572   | 0.1432051  | 0.1704511  |
| 0.02019957   | 17.4079    | 0.5503017  | 0.5644283  | 0.2642322   | 0.5436233  |            |
| 0.0260131    | 3.605951   | 0.4586715  | 0.6831414  | 0.1493721   | 0.2450009  |            |
| 0.06231853   | 0.07408958 | 0.9461217  | 0.1019484  | 0.04320463  | 0.1622991  |            |
| 1.25222515   | 4877       | 0.1939158  | 0.1132033  | 0.1817961   | 0.09450329 | 0          |
| 0.2856796    | 0.7849514  | 0.06583563 | 0.4524703  | 0.8090697   | 0.178808   |            |
| 0.05613353   | 0.5701955  | 0.2673983  | 0.1991776  | 0.1163082   | 0.08342963 |            |
| 0.0409307    | 0.1699854  | 0.1217905  | 1.248075   | 0.04175481  | 0.04957344 |            |
| 0.1144053    | 0.3181432  | 0.2058574  | 2.377702   | 0.1050529   | 0.5748094  |            |
| 0.1163616    | 0          | 0.2246369  | 0.06750235 | 0.0539637   | 1.598571   | 0.233305   |
| 0.1330005    | 0.2057493  | 0.2262352  | 0.1272271  | 0.129882    | 0.03945962 |            |
| 0.4887568    | 1.147924   | 0.01167255 | 0.1340225  | 0.06972133  | 0.1830788  |            |
| 0.3418388    | 0.3231931  | 0.0746576  | 0.2559572  | 0.02747189  | 0.1796093  |            |
| 0.1879452    | 0          | 0.2925455  | 0.250193   | 0.1902104   | 0.201342   | 0.255327   |
| 0.2510906    | 0          | 0.1435723  | 0.5220811  | 0.03954322  | 0.08397072 | 0.06173451 |
| 0.4028867    | 0.3625961  | 0.03393527 | 0.05272429 | 0.5101886   | 0.7667537  |            |
| 0.08353038   | 0.1080428  | 0          | 0.03179625 | 1.221036    | 0.6001415  | 0.03418388 |
| 0.1346638    | 0.3517008  | 0.2083745  | 0.4384653  | 0.1819649   | 0.03872282 |            |
| 0.09963203   | 1.982561   | 0.2180421  | 0.1320594  | 0.05126302  | 0.08866698 |            |
| 0.07744564   | 0.3175418  | 1.3157751  | 1.197134   | 0.5025031   | 0.06231853 | 0.1456568  |
| 1.364357     | 0.07436016 | 1.196612   | 0.08483818 | 0.6944893   | 0.1110976  | 0.09963203 |
| 0.3819356    | 0.05184556 | 1.120892   | 0.8159301  | 0.1081084   | 0.0345637  |            |
| 0.2931581    | 0.04530194 | 0.3443616  | 0.6607893  | 0.3695921   | 0.2300696  |            |
| 0.09806165   | 0          | 0.1989808  | 0.2527095  | 0.1502165   | 0.05953557 | 0.5402009  |
| 0.09695792   | 0.1794654  | 0.1406864  | 0.4387653  | 0.06951359  | 1.44858    |            |
| 0.3331179    | 1.639766   | 0.08944601 | 0.4641236  | 1.030178    | 0.2769655  | 0.4866934  |
| 0.2474447    | 0.4552293  | 0.09285771 | 0.1290166  | 0.09160442  | 0.1804195  |            |
| 0.1651717    | 0.2680704  | 0.1192613  | 0.02431844 | 0.3018501   | 0          | 0.07594873 |
| 1.117381     | 0.2654021  | 0.1907775  | 0.03387368 | 0.1217905   | 0.3383605  |            |
| 0.08204132   | 0.06701759 | 0.1424763  | 1.01575    | 0.3985281   | 0.4077175  |            |
| 0.7175077    | 0          | 0.2208805  | 0.365173   | 0.843096    | 0.228677   | 0.4102066  |
| 0.1991628    | 0.09501445 | 0.3828092  | 0.1871118  | 0.1318916   | 0          | 1.161028   |
| 0.184796     | 0.07480722 | 0.0537879  | 1.655312   | 0.3026659   | 0.4057478  | 0.9859155  |
| 0.1474475    | 0.8202897  | 0.03112463 | 0.1950303  | 0.09064389  | 0.2120955  |            |
| 0.06514625   | 0          | 0.5419141  | 0.4038569  | 0.2420455   | 0.04138448 | 0.3843927  |
| 0.3187469    | 0.6340823  | 0.3759706  | 0.2549781  | 0.1221226   | 0          | 0.1660112  |
| 0.07234264   | 0.09753913 | 0.02123367 | 0          | 0.009655665 | 0.1886121  | 1.338635   |
| 0.02402111   | 0.04355753 | 1.642467   | 0.1563183  | 0.07445383  | 0.2830706  |            |
| 0.2594174    | 0.0704317  | 0.182314   | 0.1898075  | 0.1340352   | 0.08091503 |            |
| 1.605035     | 0.5287365  | 1.093617   | 8.759707   | 0.06041656  | 0.1679586  | 0          |
| 0.0566569    | 0.05003861 | 0.1376985  | 0.07828641 | 0.04583595  |            |            |
| TCGA-XF-A9T0 | 799        | 0          | 0.1249074  | 0.0954098   | 0.2588509  | 0.2145694  |
| 0.08215155   | 109.80660  | 0.155629   | 0.5535979  | 0           | 0.01763253 | 0.4764028  |
| 0.5261426    | 1.786071   | 0.2314269  | 0.09489691 | 0           | 0.2594717  | 0.2332044  |

|                           |                                    |                    |                           |                           |                    |                   |            |
|---------------------------|------------------------------------|--------------------|---------------------------|---------------------------|--------------------|-------------------|------------|
| 0.04252551                | 0.08785652                         | 0.4400466          | 4.479885202.951           | 0.09036671                | 0.1150994          |                   |            |
| 0.08215155                | 0.06405741                         | 0                  | 1.5749630.2955920.1785021 | 0.03833739                |                    |                   |            |
| 0.5673246                 | 0.4420304                          | 0.09512285         | 0.7729942                 | 0.3171897                 | 0.1053729          |                   |            |
| 0.05809077                | 0.07876792                         | 0.04161625         | 0.2765320                 | 6.3577140.05660554        |                    |                   |            |
| 0.2352175                 | 0.03323469                         | 1.7970650.4186105  | 11.970350                 | 0.4583819                 |                    |                   |            |
| 0.1577474                 | 0                                  | 1.0857250          | 0.03498799                | 3.1042640                 | 0.06010137         | 2.191571          |            |
| 0.03833739                | 0.01802002                         | 0.1760766          | 0.2674702                 | 0.7454144                 | 0.3458225          |                   |            |
| 0.007912032               | 0.5833195                          | 0.05671127         | 0.3135076                 | 2.0390441.5334960.3036321 |                    |                   |            |
| 0.04163908                | 0.02234561                         | 0.3855260.07839714 | 0.04035515                | 0.2115166                 |                    |                   |            |
| 0.0678356                 | 0.5479561                          | 0                  | 0                         | 0.09932357                | 0.1134649          | 0                 | 0.5190293  |
| 0                         | 0.1034874                          | 0.08369133         | 0.01092359                | 0.1638530.04600487        | 0                  | 0.2343908         |            |
| 0.6017934                 | 0.02935832                         | 0                  | 0                         | 0.08621015                | 0.9458945          | 3.1730050.1390257 |            |
| 0.00730236                | 0.7398444                          | 0.1210654          | 0.8193248                 | 0.1409620.1049904         |                    |                   |            |
| 0.04502256                | 3.8267580.05911841                 | 0.8354658          | 0.03790663                | 0.1202027                 |                    |                   |            |
| 1.0499040.3348180.2778302 | 0.07376874                         | 0                  | 0                         | 0.1515405                 | 1.154157           |                   |            |
| 0.1008075                 | 0.1678144                          | 0.1150122          | 1.1208270                 | 0.2251128                 | 0.3223893          |                   |            |
| 0.2108557                 | 1.4916730.4147980.3214840.04685681 | 0.5298990.2456571  |                           |                           |                    |                   |            |
| 0.8403103                 | 2.1845170.1503129                  | 0.03898718         | 0.04431292                | 0                         | 0.1079005          |                   |            |
| 2.3491850.05091082        | 0                                  | 0.2110108          | 0                         | 0.1946360                 | 0.1372659          | 0.04711858        |            |
| 0.9818951.5673050.2288356 | 0.04041961                         | 1.39322            | 1.3144250.4902003         |                           |                    |                   |            |
| 0.1589864                 | 0.5750609                          | 1.4241660.06294199 | 0.1166022                 | 0.03104623                |                    |                   |            |
| 2.5926380.1119588         | 0.04542671                         | 0.02694641         | 0.01648383                | 0.3637402                 |                    |                   |            |
| 0.05418132                | 0.1415714                          | 0.3366210.6206487  | 0.08621015                | 0.2296069                 |                    |                   |            |
| 0.3531461.5388760.1112206 | 0                                  | 0                  | 0.08606353                | 0.1350677                 | 0.2456571          |                   |            |
| 1.0163470.02366948        | 0.4524871                          | 0.5806170.3744166  | 0.1623859                 | 0.0463419                 |                    |                   |            |
| 0.6389565                 | 0.7328520.04025243                 | 0.5588811          | 0.06341523                | 0.1152795                 | 0                  |                   |            |
| 0.8585263                 | 0                                  | 0.1014135          | 0.07291838                | 0.3047204                 | 0.2279521          | 1.430151          |            |
| 0.7835073                 | 0.3164917                          | 1.3405390.1265837  | 0.1850771                 | 0.4505701                 |                    |                   |            |
| 0.04792174                | 0                                  | 0.0665860.1230639  | 0.3453428                 | 0                         | 0.0561035          | 0.05790087        |            |
| 0                         | 0.1516947                          | 1.1130530          | 0.08277866                | 0                         | 0.0321508          | 0.1961448         |            |
| 0.2255695                 | 0.02878575                         | 0                  | 0                         | 0.8337877                 | 0.8295960.1628229  | 0.02952471        |            |
| 0                         | 0.2401706                          | 0.09562213         | 0.2269484                 | 0.6663470.06365454        | 0.0308946          |                   |            |
| 0.4948373                 | 0                                  | 0                  | 1.1642920.03583949        | 0.9389666                 | 2.5619150.08775495 |                   |            |
| 0.1992337                 | 0                                  | 0.07882454         | 0.07680778                | 0                         | 2.1552250          | 0.2485528         |            |
| TCGA-YF-AA3M              | 415                                | 0                  | 0.02455513                | 0.02625881                | 0                  | 0.2952703         | 0.07536619 |
| 53.447360                 | 0.07138735                         | 0.2240616          | 0                         | 0.07279271                | 0.9344476          | 0.1974623         |            |
| 1.0468510.1326950.1088235 | 0.1162577                          | 1.0711820          | 0.04388972                | 0.04029998                |                    |                   |            |
| 0                         | 2.18625633.7164                    | 0.3504528          | 0.4223706                 | 0                         | 0.08814982         | 1.243542          |            |
| 0.5329466                 | 0.08135323                         | 0                  | 0                         | 1.0409320.1864087         | 0.0785395          | 0.1418297         |            |
| 0.1371816                 | 0.09062775                         | 0.06851921         | 0.06114479                | 0.07635785                | 0.3171146          | 0                 |            |
| 1.8697230                 | 0.04624061                         | 0                  | 1.1870180.6400585         | 4.2482730.06532679        |                    |                   |            |
| 0.6307823                 | 0.02170772                         | 0.5235967          | 0.3279672                 | 0.4407491                 | 0.03282764         |                   |            |
| 0.4835997                 | 0                                  | 0.1654118          | 0.6031669                 | 0.1582690.02833996        | 0.130973           |                   |            |
| 0.1472270.2849360.2379443 | 0                                  | 0.03947753         | 0.09104754                | 0.1438066                 |                    |                   |            |

|              |            |             |             |            |            |             |            |            |   |
|--------------|------------|-------------|-------------|------------|------------|-------------|------------|------------|---|
| 0.7014853    | 1.4319580  | 0.2785534   | 0.0572998   | 0.04099992 | 0.08376707 |             |            |            |   |
| 0.02697071   | 0          | 0.3274531   | 0           | 0.1330669  | 0          | 0.09526452  | 0.04271244 |            |   |
| 0.1561398    | 0.06342292 | 0.3571198   | 0           | 0          | 0.02848195 | 0.07677879  |            |            |   |
| 0.01002135   | 0.4943196  | 0.1266152   | 0.09835927  | 0.5076145  | 0.6022777  |             |            |            |   |
| 0.01731436   | 0          | 0.07569387  | 0.3559031   | 0.0575920  | 0.4478351  | 0.06377139  |            |            |   |
| 0.1205859    | 0.2262455  | 0.05553298  | 0.3979335   | 0          | 0          | 0.06195584  |            |            |   |
| 3.0468980    | 0.08135323 | 0.4927243   | 0.008693928 | 0.08270589 | 0.8668676  |             |            |            |   |
| 0.1974623    | 0.2160961  | 1.11665     | 0           | 0          | 0.1074276  | 1.2013640   | 0.07926962 |            |   |
| 0.7184503    | 0.3956725  | 0.6092393   | 0           | 0.5576025  | 0.06721849 | 0           |            |            |   |
| 0.4987872    | 0          | 0.08457574  | 0           | 0.1215329  | 0.08451257 | 0.7066623   |            |            |   |
| 0.6920582    | 0.1378977  | 0           | 0           | 0          | 0.1484826  | 0.7408336   | 0.07005871 | 0          |   |
| 0.2903733    | 0          | 0           | 0.08748538  | 0          | 0          | 0.4157514   | 0.8590559  | 0.04498602 |   |
| 0.1112434    | 0          | 0.9043943   | 0.2511689   | 0.1203302  | 0          | 0.2613072   | 0          |            |   |
| 0.08022853   | 0.08544584 | 0.6058436   | 0.1540672   | 0.06251199 | 0.1359641  |             |            |            |   |
| 0.06805052   | 0.03128408 | 0.07455927  | 0.2833707   | 0.5404307  | 0.1856693  |             |            |            |   |
| 0.1186343    | 0.3791562  | 0.08204628  | 1.8529510   | 0.3826284  | 0          | 0           | 0          | 0          | 0 |
| 1.13261      | 0          | 0.4898951   | 0.4709841   | 0.3525306  | 0          | 0.1275428   | 0.2051635  |            |   |
| 0            | 0.03323498 | 0.2472043   | 0.1745322   | 0.1035996  | 0          | 0.3281732   | 0          | 0          |   |
| 0            | 0.09584635 | 0.2509490   | 0.3027755   | 0.8244979  | 0.1375346  | 0.2515534   |            |            |   |
| 0.05806423   | 0.2183021  | 0.2869572   | 0.4616179   | 0.2430658  | 0          | 0.07697682  |            |            |   |
| 0.1159094    | 0          | 0.2316132   | 0           | 0          | 0.2504977  | 0.8113354   | 0          | 0          | 0 |
| 0.04424292   | 0          | 0.05351857  | 0.1188368   | 0          | 0.01801303 | 0.1376857   |            |            |   |
| 2.0691730    | 0.02031457 | 1.2070650   | 0.09720598  | 0.01462069 | 0.1533134  |             |            |            |   |
| 0.5348960    | 0.2189886  | 0           | 0.2814588   | 0          | 0.05031673 | 0.6303699   | 0          |            |   |
| 0.9520875    | 0.9310810  | 0.08050678  | 0.2350001   | 0          | 0          | 0.01509938  | 0.0466745  |            |   |
| 0.1634703    | 0.2749109  | 0           |             |            |            |             |            |            |   |
| TCGA-4Z-AA7Y | 1522       | 0           | 0.3173731   | 0.1357572  | 0          | 0.3963127   | 0          | 30.1361    |   |
| 0            | 0.1499348  | 0.1158391   | 0.1092318   | 0.07840333 | 0.05691044 | 0.212682    |            |            |   |
| 0.1176562    | 0.03430146 | 0.03938299  | 0           | 0.02977407 | 0.2765193  | 0.04727259  |            |            |   |
| 0.1823059    | 0          | 1.13674236  | 0.123030    | 0.1241980  | 0.1364777  | 0           | 0.05696647 | 0          |   |
| 0.1607268    | 0.05257419 | 0.07937127  | 0.06818713  | 0.7736029  | 0.05706278 |             |            |            |   |
| 0.1353489    | 0.2749705  | 0.3062560   | 0.0644246   | 0.05904035 | 0.06645633 |             |            |            |   |
| 0.1480379    | 0.0409868  | 0           | 3.16894     | 0.1006790  | 0.1494140  | 0.009851907 | 0.1278509  |            |   |
| 0.7445433    | 4.1316020  | 0.08443435  | 1.7528540   | 0.1262567  | 0.1691861  | 0.3650206   |            |            |   |
| 0.2848323    | 0.01272884 | 0.5729613   | 0           | 0.05344835 | 0.03543583 | 0           |            |            |   |
| 0.004578646  | 0.07194467 | 0.1427173   | 0.4051052   | 0.05125684 | 0          | 0.2040975   |            |            |   |
| 0.07565028   | 0.4414387  | 1.0715124   | 0.4321640   | 0.09000702 | 0.03702977 | 0           |            |            |   |
| 0.1082683    | 0.01742971 | 0.1794398   | 0.1881024   | 0.06032642 | 0.2579819  | 0           |            |            |   |
| 0.1846929    | 0.09384932 | 0.1009047   | 0.2049340   | 0.1153936  | 0          | 0.04767321  |            |            |   |
| 0.1012349    | 0.09923596 | 0.006476257 | 0.5660466   | 0.08182456 | 0          | 0.2289472   |            |            |   |
| 2.2136860    | 0          | 0.09783372  | 0.03833348  | 1.1040580  | 0.07235291 | 0.08242401  |            |            |   |
| 0.2207964    | 0.3362835  | 0.07177593  | 1.5144040   | 0.1253580  | 0.1201161  |             |            |            |   |
| 0.8308690    | 0.1051484  | 0.3184211   | 0.01123683  | 0          | 0.09336828 | 0.2552184   |            |            |   |
| 0.02864641   | 0.9184390  | 0.03756553  | 0.1756035   | 1.7369780  | 0.1024553  |             |            |            |   |

|              |            |            |            |            |             |            |
|--------------|------------|------------|------------|------------|-------------|------------|
| 0.4145496    | 0.05114035 | 0.7226477  | 0.06696951 | 0          | 0.08687936  | 0          |
| 0.4215205    | 0.3688812  | 0.09670037 | 0.04166992 | 0.1963504  | 0.1638477   |            |
| 0.6227423    | 0.4192874  | 0          | 0          | 0          | 0.1919126   | 0.2176185  |
| 0.03588797   | 0.4249779  | 0.05844612 | 0.2596356  | 0.2261483  | 0.04069033  | 0          |
| 0.4701859    | 0.5984719  | 0          | 0.2875624  | 0.4396435  | 0.1461153   | 0.4173862  |
| 0.07069354   | 0.7671053  | 0.5910405  | 0          | 0.1425802  | 0.05521903  | 0.228389   |
| 0.1327537    | 0.2019906  | 0.02396353 | 0.02931825 | 0.1213033  | 0           | 0.1144545  |
| 0.1496791    | 0.3439657  | 0.2300009  | 0.3675423  | 0.06933656 | 0.3684498   |            |
| 0.6923617    | 0          | 0.1030615  | 0.1530732  | 0.3603484  | 0.2730795   | 0.4879631  |
| 0            | 0.2248696  | 0.5109094  | 0.01752473 | 0.2231796  | 0.1236360   | 0.2083496  |
| 0.3087131    | 0.1002305  | 0.1834221  | 0.1127907  | 0.06904304 | 0           | 0.2757048  |
| 0            | 0          | 0          | 0.1083955  | 0.3243496  | 0.3913349   | 2.541182   |
| 0.6231672    | 0.01250792 | 0.07053842 | 0.2781674  | 0.2557018  | 0.1178102   |            |
| 0.1184303    | 0.04642956 | 0.2471897  | 0.03242328 | 0.04989303 | 0           | 0.04269783 |
| 1.438961     | 0.8648867  | 0          | 0.2208460  | 0.2573263  | 0           | 0.07608955 |
| 0.08858958   | 0          | 0          | 1.9366260  | 0.08687936 | 0.07876927  | 0.2400187  |
| 0.0519671    | 0.1798085  | 0.6255060  | 0.1415205  | 0          | 0.1760242   | 0.2019906  |
| 0.06503397   | 2.563061   | 0.03187217 | 0.7031798  | 3.698919   | 0.2133114   | 0.07593393 |
| 0            | 0.07009892 | 0.01951583 | 0.09048963 | 0.1509172  | 0.005551876 | 0.09946748 |
| TCGA-FD-A62O | 216        | 1          | 0.2584182  | 0.1554456  | 0.0585737   | 0.2689117  |
| 0.2726466    | 103.82110  | 0.2347752  | 0.05895062 | 0.5558815  | 0.1117186   |            |
| 0.5502734    | 0.3896424  | 0.5089404  | 0.06982413 | 0.0543998  | 0.03823425  | 0          |
| 0.4573427    | 0.1058510  | 0.2650731  | 0.1327671  | 2.164315   | 73.721360   | 0.07435817 |
| 0.1487163    | 0.1159611  | 0.1022425  | 0.9114187  | 0          | 0.2827446   | 0          |
| 1.2666450    | 0.3420182  | 0.06887915 | 0.2798654  | 0.2296794  | 0.1669091   |            |
| 0.03755709   | 0.1133416  | 0.2636780  | 0.04171642 | 0          | 6.7755590   | 0.3586492  |
| 0.1520738    | 0.03008185 | 0.2602536  | 0.4630983  | 9.581441   | 0.3867183   |            |
| 2.1574650    | 0.2427303  | 0          | 0.4074719  | 0          | 0.06765612  | 1.0602920  |
| 0.2524665    | 0          | 0.08854288 | 0.1206065  | 0.2420964  | 0.2623833   | 0.5738621  |
| 0.03580725   | 0.2942852  | 0.1454387  | 0.4138261  | 2.1811730  | 0.7931538   |            |
| 0.06107284   | 0.08794087 | 0.07416117 | 0.5877098  | 0          | 0.03652682  | 0.2871764  |
| 0.4298022    | 0.7877230  | 0.1253205  | 0.06742586 | 0          | 0           | 0.8808583  |
| 0.08007803   | 0          | 0.09367    | 0.02525062 | 0.03295772 | 0.4221099   | 0.04164057 |
| 0.2260669    | 1.7826670  | 0.01898087 | 4.2423970  | 0.09957529 | 0.1560635   | 0.3745706  |
| 0.1472818    | 0.3355651  | 0.5948654  | 0.1934569  | 0.3287414  | 0.8870103   |            |
| 0.1594869    | 0          | 0.1630058  | 1.8419160  | 0.4280807  | 0.2700745   | 0          |
| 0.09503036   | 0.3030552  | 1.47604    | 0.8012472  | 0          | 0.2676398   | 0.282642   |
| 1.8482570    | 0.06517449 | 0.8776127  | 0.05205072 | 0.5275395  | 0           | 0.4075145  |
| 0.2475926    | 0.06361754 | 0.5678260  | 0.1877239  | 0.1882851  | 0.0424117   |            |
| 0.3597222    | 0.1667644  | 1.3099110  | 0.7397021  | 0          | 0.03528862  | 0.04010914 |
| 0.1953289    | 0.2214924  | 0.1382434  | 0          | 0.3819861  | 0           | 0.4844721  |
| 0.2484881    | 0.04264863 | 0.1367302  | 1.46671    | 0          | 0.07317034  | 0.569507   |
| 1.4128050    | 0.9298756  | 0.3453695  | 0.5205072  | 1.2031240  | 0.3034293   |            |
| 0.0843030    | 0.3763551  | 0.1688961  | 0.08223453 | 0.2195110  | 0.01492008  | 0.08230841 |

|              |            |            |            |             |            |            |           |
|--------------|------------|------------|------------|-------------|------------|------------|-----------|
| 0.04904136   | 0.1863871  | 0.5078119  | 0.3500887  | 0.4291746   | 0.74817    |            |           |
| 0.1411417    | 1.3058340  | 0.05033476 | 0          | 0.2097922   | 0.1557981  | 0.6927747  |           |
| 0.2779407    | 1.4560860  | 0.7107096  | 0.5753239  | 0.3745706   | 0.2806001  | 0          |           |
| 0.5590633    | 0.8029775  | 0.1967428  | 0.4335963  | 0.2869964   | 0.09369613 | 0          |           |
| 0.1726848    | 0.0755852  | 0          | 0.1320018  | 0.3349156   | 0.2475926  | 0.2489382  |           |
| 0.6674628    | 0.2110813  | 0.3447067  | 0.08911407 | 0.02393136  | 1.715567   |            |           |
| 0.2168780    | 1.598766   | 0          | 0.0506315  | 0.1982224   | 0.1980027  | 0          | 0         |
| 1.3089650    | 0.4563506  | 0          | 0.3996042  | 0           | 0.2328063  | 0.1775373  | 0.1408074 |
| 0.0781649    | 0.1803332  | 0.01184807 | 0.6037517  | 2.5812040   | 0.02947531 |            |           |
| 0.09353338   | 1.5268210  | 0.2301740  | 0.05289219 | 0.4183071   | 0.6533945  | 0.3745033  |           |
| 0.02796376   | 0.3702591  | 0.1233518  | 0.2978625  | 0.4031084   | 0.06487908 |            |           |
| 2.05763      | 2.8099330  | 0.2276993  | 0.07728566 | 0.0679594   | 0.4994275  | 0.00993162 |           |
| 0.06140031   | 0.3532886  | 0.1751719  | 0.1912276  |             |            |            |           |
| TCGA-BL-A3JM | 205        | 1          | 0.1886821  | 0.1592946   | 0.1440577  | 0.4684695  |           |
| 0.01523987   | 81.269220  | 0.1660060  | 0.5255697  | 0.2050725   | 0.07850393 |            |           |
| 0.3145962    | 0.4791485  | 0.5338139  | 0.1878268  | 0.08626085  | 0.2350859  |            |           |
| 0.004658168  | 0.6921852  | 0.1479164  | 0.2281748  | 0.1632654   | 2.975659   |            |           |
| 51.498250    | 0.1325869  | 0          | 0.09143924 | 0.1782486   | 0          | 1.5518550  | 0.2961093 |
| 0.4222009    | 0.1280149  | 3.1994170  | 0.5634244  | 0.5611482   | 0.2007566  |            |           |
| 0.1664378    | 0.2052504  | 0.05542136 | 0.3023597  | 0.04632119  | 0.4360436  |            |           |
| 0.1378301    | 9.8728440  | 0.1890153  | 0.1122043  | 0.09248014  | 0.4400513  |            |           |
| 1.8378614    | 0.8679360  | 0.2906155  | 2.8061240  | 0.1668025   | 0          | 0.5010736  | 3.183012  |
| 0.03363309   | 1.0756810  | 0.1337923  | 0.4213405  | 0.06400747  | 0.01289397 |            |           |
| 0.1880377    | 0.2977092  | 0.7375001  | 1.0906060  | 0.008806531 | 0.1277247  |            |           |
| 0.1157251    | 0.3998401  | 2.5532650  | 0.06095949 | 0.1126531   | 0.08496877 | 0          |           |
| 0.3952346    | 0.06544528 | 0.04491752 | 0.1765723  | 0.5662859   | 0.2331992  | 0          |           |
| 0.0577906    | 0.6045848  | 0.1894391  | 0.5642917  | 0.2527474   | 0          | 0          |           |
| 0.1094279    | 0.1242041  | 0.05876639 | 0.3682621  | 0.1024119   | 0          | 0.2010136  |           |
| 1.0656380    | 0.02100693 | 0.04075729 | 0          | 0.6237184   | 2.86239    | 0.7697361  |           |
| 0.05158111   | 0.1015992  | 0.7685887  | 0.1122938  | 1.2427610   | 0.4510833  |            |           |
| 0.02921503   | 0.07516891 | 3.0912660  | 0.0987031  | 2.4244340   | 0.05274024 | 0.06689617 |           |
| 0.6135156    | 0.2661936  | 0.2196055  | 0.4105435  | 0           | 0.07052576 | 0.1610061  |           |
| 1.8940220    | 0.2324232  | 0.9131795  | 0.4480523  | 0.1840126   | 0.1257290  | 0.8519143  |           |
| 0.1902925    | 0.03911567 | 0.9620516  | 0.1538977  | 0.2499544   | 0.07823135 |            |           |
| 0.5160812    | 0.3759662  | 1.3769871  | 0.0495630  | 0           | 0.07398411 | 0.09084931 |           |
| 0.4203475    | 0.4085583  | 0.02833329 | 0.04491752 | 0.4075629   | 0          | 0.9207228  |           |
| 0.1061430    | 0.7129946  | 0          | 0.3783128  | 4.3021080   | 0.2474410  | 0.2751298  |           |
| 2.9260560    | 0.01741341 | 0.1681126  | 1.1468     | 2.1135670   | 0.1751448  | 0.2514579  |           |
| 0.1036685    | 1.5926070  | 0.02076938 | 0.6067494  | 0.1699595   | 0.03669483 |            |           |
| 0.4681229    | 0          | 0.2292027  | 0.7493557  | 0.5556567   | 0.4797834  | 0.5878     |           |
| 0.1735638    | 1.6510930  | 0.4332813  | 0.1516874  | 0.4299738   | 0.2394837  |            |           |
| 0.4259572    | 0.1025362  | 1.4157980  | 0.5925215  | 0.4387758   | 0.02193402 |            |           |
| 0.2711168    | 0.1289528  | 0.3318906  | 0.2575910  | 0.2240160   | 0.3295467  | 0.3529234  |           |
| 0.2042526    | 0          | 0.09290434 | 0.09294814 | 0           | 0.1623244  | 0.2822385  |           |



|              |             |             |            |            |             |            |             |
|--------------|-------------|-------------|------------|------------|-------------|------------|-------------|
| 0.5074466    | 0.5816331   | 1.5646270   | 7.138161   | 1.8735960  | 0.1330672   | 0.2648585  |             |
| 0.02072354   | 0.02666978  | 0.04915059  | 0          | 0.05396061 | 0.1640671   | 0.1014528  |             |
| 0.06244631   | 0.03222344  | 0.02672039  | 0.7710572  | 1.6436760  | 0           | 0.02546409 |             |
| 0.1968209    | 0.2729001   | 0.0995628   | 0.4005018  | 0          | 0           | 0.4083429  |             |
| 3.2318520    | 3.262157    | 0.08215661  | 0.03755105 | 0.1729738  | 0.06208577  |            |             |
| 0.2594954    | 0.5047553   | 0.1948403   | 0.08596852 | 0.8812501  | 4.373652    |            |             |
| 0.02034919   | 1.5473170   | 2.2592937   | 0.4950578  | 2.8180060  | 0.1758170   | 0.1267189  | 0           |
| 0.8773609    | 0.07327828  | 0.03775239  | 0.8311097  | 0.03126938 | 0.1106612   |            |             |
| TCGA-FJ-A3ZF | 524         | 0           | 0.2837494  | 0.3742382  | 0.3087136   | 0.2712124  | 0           |
| 37.742240    | 0.1649848   | 2.4338180   | 0.1302125  | 0.2990805  | 0.4654681   |            |             |
| 1.1916051    | 4.726780    | 2.2760069   | 0.04191739 | 0.08956186 | 0.4037320   | 0.1648158  |             |
| 0.1352459    | 0.1397072   | 0           | 7.08318781 | 7.19810    | 1.045082    | 0          | 0.5225411   |
| 0.2376790    | 2.0254690   | 0.03133619  | 0.3311578  | 0          | 0.6214777   | 0.2305227  |             |
| 0.1714302    | 0.5189937   | 0.2834174   | 0.1815248  | 0.08797566 | 0.1059848   |            |             |
| 0.2573553    | 0.5130231   | 0.0218791   | 24.975740  | 0.3300465  | 0.2849804   |            |             |
| 0.03523263   | 1.3335691   | 1.1587483   | 4.251650   | 0.3522823  | 0.3887504   | 0.04180763 |             |
| 0.1008413    | 1.1229210   | 0.2667826   | 0.02444656 | 2.3905450  | 0.03352972  | 0.06371444 |             |
| 0.8448434    | 0           | 0.006822611 | 0.2724251  | 0.5387440  | 7.024230    | 0.1833060  | 0.008387673 |
| 0.4815304    | 0.1052109   | 0.6508609   | 1.4738340  | 0.5515712  | 0.1788252   |            |             |
| 0.03678521   | 0.007896314 | 0.08604259  | 0.02077752 | 0.06417172 | 0.4064209   |            |             |
| 0.2516977    | 0.2050225   | 0.04340417  | 0.1284312  | 0.1020041  | 0.060143    |            |             |
| 0.1954374    | 0.7909576   | 0           | 0.02841502 | 0.2029611  | 0.04436126  | 0.01351032 |             |
| 0.8351114    | 0           | 0           | 0.08961627 | 1.5079310  | 0.002223088 | 0.5240536  | 0           |
| 0.1370892    | 9.8395632   | 7.7600030   | 0.1509563  | 0.6448862  | 0.1283434   |            |             |
| 1.0133430    | 0.07471805  | 0           | 0.1193229  | 4.7826920  | 0.1253448   | 0.7275317  | 0           |
| 0.1274289    | 0.2782550   | 0.6845388   | 0.05976017 | 0.9384412  | 0.05158419  |            |             |
| 0.1119523    | 0.3480763   | 1.7490360   | 0.1984685  | 0.6918439  | 0.3352972   |            |             |
| 0.3624032    | 0           | 0.3102394   | 0.8129987  | 0.1117657  | 1.8399780   | 0.7328901  |             |
| 0.1202860    | 0.1738578   | 0.1404386   | 0.3255313  | 1.33624    | 1.6160910   | 0.5311639  |             |
| 0.02066547   | 0           | 0.02884277  | 0.7435162  | 1.8678070  | 0.1619142   | 0.06417172 |             |
| 0.5362124    | 0           | 0.4384656   | 0          | 0.3152885  | 0.07492675  | 1.4813131  | 0.997116    |
| 0.6931209    | 0.02142474  | 1.2387542   | 0.0901650  | 0.3731667  | 0.0926992   | 1.270065   |             |
| 1.2581510    | 1.000887    | 0.1776921   | 0.2139322  | 1.261960   | 0.1186893   | 0.3611819  |             |
| 0.01428316   | 0           | 0.0843515   | 0.2297540  | 0.2319452  | 0.8029291   | 0.162106   |             |
| 0.4341157    | 0.8519349   | 0.5810117   | 1.2588350  | 0.2063368  | 0.0240788   |            |             |
| 0.04095233   | 0.1368560   | 0.5966143   | 0.3255313  | 1.8078620  | 0.0125462   | 1.372051   |             |
| 0.7191883    | 0.1566809   | 0.3208212   | 0.0736917  | 2.8788150  | 0.06133486  |            |             |
| 0.1621546    | 0.5713190   | 0.06722751  | 0.1982790  | 3.1475590  | 0           | 0.2705568  |             |
| 0.1211396    | 0.2416557   | 3.29466     | 2.1253810  | 4.856181   | 0.4925498   | 0.2087454  |             |
| 0.1401451    | 0.5408179   | 0           | 0.2106579  | 0          | 0.005930091 | 0.8438239  |             |
| 0.2125804    | 0.05947623  | 0.03069082  | 0.05089901 | 0.2733838  | 1.6049290   |            |             |
| 0.4095233    | 0           | 0.6475880   | 0.1559522  | 0.2185153  | 0.2746462   | 0.2112109  |             |
| 0.00693838   | 0.6128455   | 3.6278060   | 0.01726112 | 0.4616695  | 0           | 0.1647468  |             |
| 0.1323449    | 0.1946605   | 0.6279158   | 0.1687030  | 1.0281870  | 0.09631518  |            |             |

|              |            |            |            |            |             |            |
|--------------|------------|------------|------------|------------|-------------|------------|
| 0.1550507    | 1.1735820  | 0.01899701 | 2.2003882  | 4.123830   | 0.1922629   | 0.03017298 |
| 0.1591916    | 0.2924711  | 0.02326433 | 0          | 1.3942610  | 0.003309126 | 0.1119853  |
| TCGA-CU-A0YO | 149        | 1          | 0.08019924 | 0.1543745  | 0           | 0.1483660  |
| 63.001160    | 0.05588331 | 0.1865259  | 0.08781662 | 0.5520511  | 0.03169966  |            |
| 2.3680870    | 0.04299528 | 0.3567766  | 0.05200725 | 0.1222670  | 0.07594159  | 0.09028583 |
| 0.3843158    | 0.05733909 | 0.07897398 | 0          | 1.4099783  | 2.0841      | 0.1255379  |
| 0.0689750    | 0.0738458  | 0          | 1.8276830  | 0.5570083  | 0.1062827   | 0.08022753 |
| 0.1723069    | 0.3399777  | 0.5126967  | 0.0513034  | 0.4632282  | 0.08960944  |            |
| 0.2604785    | 0.05221762 | 0.1198226  | 0.01246958 | 0.04142897 | 0.0742072   |            |
| 2.0278790    | 0.1526477  | 0.1208207  | 0.07966552 | 0.1938452  | 0.3344785   | 0.903777   |
| 0.04267262   | 1.6069490  | 0.6522738  | 0.5130340  | 0.2380377  | 0.08225861  | 0.1887036  |
| 0.3685452    | 0          | 0.1080499  | 0.2149087  | 0.2756910  | 0.3077647   | 0.03422156 |
| 0.04808563   | 0.4094755  | 1.1916260  | 0.01422421 | 0.2922574  | 0.4672947   |            |
| 0.1526477    | 1.95786    | 1.1815330  | 0.1122877  | 0.2477323  | 0.1276757   |            |
| 0.07047097   | 0.07255026 | 0.2376646  | 0          | 0.2028172  | 0           | 0.06222847 |
| 0.2901654    | 0          | 0.04142897 | 0.2332770  | 0.2385787  | 0.3373126   | 0.03720982 |
| 0.05015326   | 0.4058596  | 0.2379251  | 1.1579020  | 0.6425001  | 1.3608710   | 0.9343689  |
| 0.01131005   | 0.0658307  | 0.09888915 | 1.9373510  | 0.1062827  | 0.1097002   |            |
| 0.1666264    | 0.2166143  | 0.07389378 | 0.07255026 | 0.3321420  | 0.1267103   |            |
| 0.09437554   | 0          | 0.7593006  | 0          | 0.1072854  | 0.01135806  | 0.1080499  |
| 0.04299528   | 0.6623559  | 0.3315526  | 0.08747887 | 0          | 0.09081291  | 1.409893   |
| 0.01294508   | 0.3855001  | 0          | 0.5591672  | 0          | 2.9543570   | 0.1317249  |
| 0.5263191    | 0.9321519  | 0.06374581 | 0.08423891 | 0.07938745 | 0.05520511  |            |
| 1.4267770    | 0.66397    | 0          | 0.1051364  | 0.1194983  | 0.2445646   | 0          |
| 0.1830544    | 0          | 0.4965075  | 0.05907664 | 0.2186972  | 0.2285880   | 0.08225861 |
| 0.08470952   | 0.6110464  | 1.0029070  | 0.3232423  | 0.1816654  | 0.2423926   |            |
| 0.4430748    | 0.6375212  | 0.9003480  | 0.2584603  | 1.79225    | 0.05657837  | 0.1179151  |
| 0.08372211   | 0.1758879  | 0.1341859  | 0.04083394 | 0.08881418 | 0.0889036   |            |
| 0.5108829    | 0.04870344 | 0.1388271  | 0.7060379  | 0.2587359  | 0.1549881   |            |
| 0.04127859   | 0.08245244 | 0.2660176  | 0.1999517  | 0.1225018  | 0.1736222   |            |
| 0.4641736    | 0.1214120  | 0.1104102  | 0.5941147  | 0.04255286 | 0.3229989   |            |
| 0.8954962    | 1.4171030  | 0.1061587  | 0.08331321 | 0.1531617  | 0.3467150   | 0.0361828  |
| 0.2691304    | 0.05700377 | 0.05286961 | 0          | 0.1071843  | 0.1501287   | 0.04558017 |
| 0            | 0.7434763  | 0.3278487  | 0.04944458 | 0.3314318  | 0.08984005  | 0.1643191  |
| 0.02528572   | 0.1901317  | 3.5346870  | 0.5599973  | 0.2778561  | 0.05985396  |            |
| 1.4012090    | 0.2271422  | 0          | 0.05043128 | 0.3122815  | 0           | 0.2181727  |
| 0.2485738    | 0.3472444  | 0.2467758  | 0.2601023  | 0          | 0.04894299  | 0.0776263  |
| 0.1790906    | 0          | 0.04996596 | 0.6058987  | 0          | 0.01326984  | 0.5458681  |
| 0.1015947    | 0.06207822 | 0.1780392  | 0.06655305 | 0.1144378  | 0.05554214  |            |
| 0.1126846    | 0.3675055  | 0          | 0.9722318  | 0.1288641  | 0.4886515   | 6.949334   |
| 0.01051769   | 0.1023375  | 0.2024733  | 0          | 0.1578110  | 0.09146584  | 0.1220362  |
| 0.03928239   | 0.02234234 |            |            |            |             |            |
| TCGA-CF-A5UA | 365        | 0          | 0.08795273 | 0          | 0           | 0.0677957  |
| 0.1532150    | 0.2876609  | 0.3477736  | 0          | 0          | 0.07301589  | 0.1178799  |
|              |            |            |            |            |             | 0.3804004  |

|              |             |             |             |            |             |             |            |
|--------------|-------------|-------------|-------------|------------|-------------|-------------|------------|
| 0.06337245   | 0.3975850   | 0.06940288  | 0.4400643   | 0          | 0.1834073   | 0           | 0          |
| 3.62722775   | 2.73270     | 0.06073879  | 0.1103132   | 0.7423629  | 0.0526232   | 0           |            |
| 4.2632840    | 1.942632    | 0           | 0           | 0.07613979 | 0           | 0.3386747   | 0.0297796  |
| 0.1136151    | 0.02726948  | 0.04147941  | 0           | 0.1135856  | 0.1356356   | 7.3920390   |            |
| 0            | 0           | 0.2952580   | 8.9882750   | 0.2259365  | 0.09071268  | 0           | 0.5982412  |
| 0.4134680    | 0.002612968 | 6.7362560   | 0           | 0.7856187  | 0           | 0.002114779 | 0.1368282  |
| 0.08789075   | 0.3061791   | 0           | 0.006499738 | 0.08641262 | 0           | 0.2360844   | 0          |
| 1.0348090    | 0.08314465  | 0.4218804   | 0           | 0.08334468 | 0           | 0           | 0.4561227  |
| 0.9002924    | 0           | 0           | 0.1529894   | 0.1864230  | 0           | 0           | 0          |
| 0.04659414   | 0           | 0           | 0.2114917   | 0.5393166  | 0.04823575  | 0.6617881   | 0          |
| 0.8741844    | 1.3701490   | 0.4187688   | 0.05998892  | 0.5537574  | 0           | 0.9370270   | 0          |
| 0            | 7.9906340   | 0.5882876   | 0           | 0          | 0.3881234   | 0.3143465   | 0.04300129 |
| 0.1212021    | 0           | 0           | 0.05658665  | 0.9116738  | 0.01183049  | 0.6586625   | 0          |
| 0.2301901    | 0           | 0           | 0.2166897   | 0          | 2.3592010   | 0.07767624  | 0          |
| 0.3451577    | 3.2147540   | 0           | 0           | 0.04470142 | 0.1329605   | 1.12575     | 0          |
| 0.1657589    | 0.1478535   | 0.05399003  | 0.1598936   | 0.1566796  | 0.2631160   |             |            |
| 0.6825307    | 0.6546823   | 0.1074220   | 0.07384072  | 0.2024626  | 0.3384392   |             |            |
| 0.05224295   | 0           | 0.4289827   | 0           | 0          | 0.02550449  | 1.1252050   | 0.03065806 |
| 0.007378829  | 0           | 0.0186758   | 0           | 0.07400973 | 0           | 0.43597     | 0          |
| 0.7840395    | 0.1827355   | 0.1865903   | 0           | 0.4949086  | 0           | 0           | 0.9783531  |
| 0.1421276    | 0.1506244   | 0.1295088   | 0           | 0          | 0.5598966   | 0.1901173   | 0          |
| 0.1585061    | 0           | 0.09276948  | 0           | 0.2546844  | 0.2744048   | 0.1666225   | 0          |
| 0.1555610    | 0.4518731   | 0.1514474   | 0.1094729   | 0.3253704  | 0.1039886   |             |            |
| 0.7384843    | 0.6882835   | 0           | 0           | 0          | 0.006127093 | 0.04151697  | 0          |
| 0.1426968    | 0.03944243  | 0.008307819 | 0.4458704   | 0          | 0           | 0           | 0.07923569 |
| 0            | 0           | 0           | 0.02150663  | 0          | 0.08518919  | 0           | 0          |
| 0.02033871   | 0.03041136  | 0.8366757   | 0           | 0.05420121 | 0.03731806  | 0           |            |
| 0.3815413    | 0           | 2.0298991   | 0.47323     | 0.07689678 | 0           | 0           | 0          |
| 0.3903505    | 0           | 0.04083725  |             |            |             |             |            |
| TCGA-K4-AAQO | 359         | 0           | 0.06823156  | 0.1641725  | 0           | 0.1104479   | 3.403086   |
| 36.654171    | 1.1886040   | 0.3347403   | 0.2490408   | 0.1174179  | 0.03371162  | 5.536377    |            |
| 0.3200692    | 0.3161842   | 0.1013982   | 0.6108256   | 0.2019039  | 0.2000338   |             |            |
| 0.4087081    | 0.1626090   | 0.1399774   | 0           | 2.33978849 | 0.668520    | 0.1492122   | 0.1100292  |
| 0.3141310    | 0.2449427   | 22.568350   | 0.9132238   | 0.5651423  | 0.08531954  | 0.03664862  |            |
| 0.6869562    | 1.5130330   | 0.2909845   | 3.54693     | 0.2512373  | 0.7932585   | 0.08726434  |            |
| 0.1390120    | 0.09282709  | 0.1321753   | 0.1972927   | 2.5977080  | 0.05411206  | 0.06424459  |            |
| 0.1270828    | 0.6871616   | 0.3557072   | 4.4774      | 0.1815241  | 0.5696470   | 0.2111180   |            |
| 0.3797188    | 0.3061783   | 2.0417730   | 0.6159004   | 0.06047022 | 0.05745389  |             |            |
| 0.2666403    | 1.7957822   | 0.1901920   | 0.1410252   | 0.2045504  | 0.4750525   | 0.9917667   |            |
| 0.02269051   | 0.2742414   | 2.4938040   | 0.4495463   | 0.9303111  | 2.1465620   |             |            |
| 0.7960973    | 3.2611550   | 0.1939702   | 0.4496624   | 0.07715499 | 0.4296735   |             |            |
| 0.1945423    | 0.3389414   | 0.1043715   | 0.1654452   | 0.2611079  | 0.3254003   | 0           |            |
| 0.9923318    | 0           | 0           | 0.04946439  | 0.02666823 | 2.7916030   | 0.1445863   | 3.386332   |
| 0.8199352    | 3.88993     | 1.0459710   | 0.04811156  | 0.03500447 | 0           | 19.490573   | 0.842967   |

|              |             |            |            |            |             |            |
|--------------|-------------|------------|------------|------------|-------------|------------|
| 0.8555273    | 1.0632130   | 0.2722469  | 0.3143351  | 0.03857749 | 0.6757307   |            |
| 0.1010644    | 0.4516448   | 0.08607861 | 2.2511930  | 0.1130285  | 0.2852369   |            |
| 0.06039473   | 0.05745389  | 0.4014621  | 0.3657934  | 0.6197139  | 0.2820768   |            |
| 0.6512178    | 0.1211423   | 0.09218691 | 1.5983940  | 0.05506679 | 0.3386689   | 0          |
| 1.3232460    | 0.1799709   | 29.180650  | 0.2334758  | 0          | 0.6130314   | 0.1321753  |
| 0.2937642    | 0.1791710   | 0.04221307 | 0.1761269  | 0.4909022  | 0.8413248   |            |
| 0.04789721   | 0.4845072   | 0.5506920  | 0.9363131  | 0.1031475  | 0.6082111   |            |
| 0.09733637   | 0.03857749  | 0.2373126  | 0.2513048  | 0.1395467  | 0           | 0.08747953 |
| 0.0450430    | 0.8664392   | 0.0696370  | 0.03863912 | 0.6874057  | 0.7853276   | 0.7128806  |
| 3.8451690    | 0.3664862   | 0.6807154  | 0.06016937 | 0.1253991  | 0.3561436   |            |
| 0.2805772    | 0.1427026   | 0.08685131 | 0.2404212  | 0.06303085 | 0.5650407   | 0          |
| 0.6028567    | 0.9653783   | 0.1891710  | 0.2884440  | 0.6584779  | 0.07453281  | 0.7921245  |
| 0.5847670    | 0.6513848   | 0.1846419  | 0.8227241  | 0.2582358  | 0.05870895  |            |
| 0.9179314    | 0           | 0.8110404  | 0.8179547  | 2.3547590  | 0.08467242  | 0.2215026  |
| 0.4275672    | 0.03687209  | 0.0769586  | 0.2607709  | 0.06062178 | 0.09220936  | 0          |
| 0.7067208    | 0.3991434   | 0.09694625 | 0.1394126  | 1.5626030  | 0.4358214   |            |
| 0.5258280    | 0.6168183   | 0.2229317  | 0.3786215  | 0.08067178 | 0.07582473  |            |
| 11.031480    | 0.1374323   | 0          | 0          | 0.3850131  | 0.6119490   | 0.03485315 |
| 0.05363213   |             |            |            |            |             |            |
| 0.1660510    | 0.0917954   | 0.4640401  | 0.8559591  | 0.4626137  | 0.1846419   |            |
| 0.4373976    | 0.1844073   | 0.09375228 | 0.2081975  | 0.0825532  | 0.0952287   | 0          |
| 0.4038433    | 1.0904470   | 0.0622602  | 0.05644828 | 0.06450157 | 0.1485589   |            |
| 0.08633162   | 0.2721752   | 0.5308286  | 0.06085054 | 0.08860106 | 0.2018302   |            |
| 0.08685131   | 0.2097233   | 0.6325273  | 0.1713037  | 0.7558778  | 12.2309     |            |
| 0.06711146   | 0.1632492   | 0.07177474 | 0.2260569  | 0.1992947  | 0           | 0.5191273  |
| 0.06564742   | 0.2494842   |            |            |            |             |            |
| TCGA-XF-AAMJ | 1670        | 1          | 0.13034314 | 0.11615546 | 0.07878371  | 0.34160163 |
| 0.30004314   | 23.30589237 | 0          | 0.2368357  | 0.11893602 | 0           | 0.12879901 |
| 2.27235147   | 0.05823143  | 0.84561179 | 0.27000834 | 0.18484968 | 0           | 0.11209022 |
| 3.1230297    | 0.09060126  | 0.46349257 | 0.1785764  | 2.18453722 | 35.80134723 |            |
| 0.0800115    | 0.09341753  | 0.5000719  | 0          | 0.55007909 | 1.54022147  | 1.36748635 |
| 0.0543288    | 0.23336689  | 0.32231839 | 0.29511147 | 0.04632245 | 0.06273814  |            |
| 0.14343037   | 0.10423154  | 0.11113438 | 0.08114194 | 0.01688839 | 0           | 0.30151154 |
| 12.01591215  | 0.20674114  | 0.08181787 | 0.13487053 | 0.35005033 | 0.45300631  |            |
| 3.38996112   | 0           | 0.89288201 | 0.55693794 | 0          | 0.51582509  | 0          |
| 0.30591451   |             |            |            |            |             |            |
| 2.49572923   | 0           | 0.14633933 | 0.29106547 | 0.18669351 | 0.37295016  | 0.32444011 |
| 0.19537693   | 0.20166566  | 2.31559492 | 0.02889721 | 0.1629864  | 0.17260607  |            |
| 0.15903164   | 1.35404085  | 1.53355384 | 0.04107257 | 0.30415783 | 0.19043068  |            |
| 0.14821698   | 0.14316544  | 0.09825974 | 0.19313122 | 0.0825856  | 0.39241311  | 0          |
| 0.12642037   | 0.16626532  | 0.13813645 | 0.05611007 | 0.63188573 | 0.10770779  | 0          |
| 0.25197897   | 0           | 0.03103051 | 0.58309754 | 0.28004027 | 0           | 0.68298355 |
| 1.06566674   | 0.57697671  | 0.04457949 | 0          | 0.36734413 | 0.50381076  | 0.99049612 |
| 0.39492858   | 0.48006903  | 0.40031747 | 0          | 0.72365961 | 0.08580621  | 0.0639096  |
| 0.32887291   | 2.85139634  | 0          | 0.36325978 | 0.03845747 | 0           | 0.63909604 |
| 0.17469431   | 1.7451268   | 0.17961766 | 0          | 0.05142643 | 0.13976601  | 1.54922861 |

|              |             |            |             |            |            |             |
|--------------|-------------|------------|-------------|------------|------------|-------------|
| 0.0525972    | 0.77181326  | 0.07001007 | 0.85965849  | 0.09167985 | 0.98661873 |             |
| 0.04757441   | 0           | 1.73115801 | 0           | 0.17842625 | 0.17113572 | 0.4838392   |
| 0.14953606   | 0.85252111  | 1.28192346 | 0           | 0.28478671 | 0          | 0.06624608  |
| 0.26272434   | 0.23833214  | 0.06198074 | 0.09825974  | 0.35511606 | 0.0800115  |             |
| 0.23695715   | 0           | 0.16711264 | 0.11472786  | 0.82758168 | 0.4096477  | 0.59698507  |
| 0.24604177   | 0.16414438  | 0.40005752 | 0.27299886  | 1.11294671 | 0.17502517 |             |
| 0.34676656   | 0           | 0.15970038 | 0.03779685  | 0.29777119 | 0.04543426 | 0.05530418  |
| 0.13122228   | 0           | 0.44283097 | 0.13192475  | 0.09401148 | 0.20490751 | 0.44898031  |
| 0.3148664    | 0.27953203  | 0.15633932 | 0.97277145  | 0.40621226 | 0.27652091 |             |
| 0.14108899   | 0.31433091  | 0.27406076 | 0.97198442  | 0.55414572 | 0          | 0.37265056  |
| 0.39435622   | 3.31075642  | 0.08986123 | 0.28209184  | 0.75195998 | 0.42262174 |             |
| 0.03920386   | 0.22680095  | 0.07720408 | 0.1489382   | 0          | 0.40646749 | 0.10166478  |
| 0.18519697   | 0.08877357  | 1.30372295 | 0.27751738  | 0.53572921 | 0.22444029 |             |
| 0.08111765   | 0.24109427  | 0.01712308 | 0.12875415  | 2.27576505 | 0          | 0.10751982  |
| 0            | 0.51302882  | 0.20508941 | 0.22193393  | 0.13660501 | 0.07049068 | 0.17535728  |
| 0.34473382   | 0.29181025  | 0.42082554 | 0           | 0.05570421 | 0.03914159 | 0           |
| 0.04734772   | 0.24531408  | 0.84894097 | 0.01593607  | 0          | 1.38872427 | 0.07929068  |
| 0.03594449   | 0.16429029  | 0.25799354 | 0.0452721   | 0.24615412 | 0.31548062 |             |
| 9.53193662   | 0           | 0.3855574  | 0.44243345  | 0.04451507 | 0.64288852 | 0.21816168  |
| 1.50412253   | 9.19179219  | 0.17093787 | 0.34650652  | 0.0914078  | 0.19192791 |             |
| 0.12022544   | 0           | 0.4751857  | 0.04560241  | 0.07564938 |            |             |
| TCGA-GU-A763 | 997         | 0          | 0.1127758   | 0.02192734 | 0          | 0.1232823   |
| 135.29320    | 0.03571947  | 0.1788354  | 0.2993632   | 0          | 0.05065445 | 0.0408538   |
| 0.2748171    | 1.0642070   | 0.1385083  | 0.1453964   | 0.07281048 | 0.1202268  | 0           |
| 0.1221666    | 0.1177833   | 0          | 1.44104     | 170.60220  | 0.05664088 | 0.1102185   |
| 0.09440147   | 0.03680462  | 0          | 2.5515370   | 0.03396688 | 0.0256399  | 0           |
| 0.05325211   | 0.08744557  | 0.4737377  | 0.1093461   | 0.1135176  | 0.05721676 |             |
| 0.06266304   | 0.08767329  | 0.02648056 | 0.02371587  | 11.533050  | 0.0325231  |             |
| 0.1158393    | 0.006365073 | 0.9912154  | 0.05344789  | 13.3162    | 0.1091019  |             |
| 0.2370298    | 0.03625393  | 0          | 0.6770625   | 0.1840231  | 0.01279256 | 3.7354140   |
| 0.2417216    | 0.9157686   | 0          | 0.004437224 | 0.2105346  | 0.1536768  | 0.09517398  |
| 0            | 0.02272956  | 0.1538394  | 0.04887577  | 0.1726226  | 0.3993908  | 1.888029    |
| 0.2326052    | 0.07177204  | 0.02139804 | 0.04663296  | 0          | 0.02318633 | 0.3038208   |
| 0.1559016    | 0.3518709   | 0          | 0.1193255   | 0.07133379 | 0.06519204 | 0           |
| 0.1118294    | 0.05083156  | 0          | 0.02972971  | 0          | 0          | 0.2389780   |
| 0.0410673    | 0.1435017   | 0.7072456  | 0.002409718 | 0          | 0          | 0.02476631  |
| 1.2228080    | 0.2337271   | 0.1065042  | 0.1090861   | 0.5384380  | 0.1623043  | 0.2584502   |
| 0.02024767   | 0           | 0.02586802 | 3.4487810   | 0.03396688 | 1.02862    | 0.007259838 |
| 0.06906331   | 0.4825834   | 0.1374086  | 0.0138808   | 0.1271530  | 0.1213508  |             |
| 0.08179176   | 1.7258350   | 0.03309693 | 0.3106831   | 0          | 0.3091099  | 0.08653468  |
| 0.05173604   | 0.02245224  | 0          | 1.8182290   | 0.07944167 | 0.1113697  | 0.0269219   |
| 0.05074285   | 0.03528599  | 0.2414031  | 0.6072880   | 0          | 0          | 0.03126414  |
| 0.6467505    | 0           | 0          | 0.1711591   | 0.1888029  | 0.08387207 | 0.0365272   |
| 0.1577341    | 0           | 0.2169825  | 0.6232314   | 0.5446989  | 0.04644673 | 0.1032883   |

|                    |                            |                           |                            |                           |                    |               |
|--------------------|----------------------------|---------------------------|----------------------------|---------------------------|--------------------|---------------|
| 1.0384160.2157303  | 0.04567335                 | 0.05506752                | 0.3273056                  | 0                         | 0.03349729         |               |
| 0.05351347         | 0.5972524                  | 0.06432666                | 0.05220045                 | 0.02064299                | 0.1515343          | 0             |
| 0.03113025         | 0.2588118                  | 0.1289386                 | 0.5374809                  | 0.1981305                 | 0.07915332         |               |
| 0.0711476          | 1.2029840.03195127         | 0.07830068                | 0.02219515                 | 0.04944839                |                    |               |
| 0.1034721          | 0.07057197                 | 0.2973483                 | 0                          | 0.2810073                 | 0.1650430.03396688 |               |
| 0.008481812        | 0                          | 0.03671168                | 0.1108066                  | 0.05550554                | 0.1758454          | 0             |
| 0.09597263         | 0                          | 0.2329341                 | 0.1919185                  | 0.1748035                 | 0                  | 0.1438151     |
| 0.05238856         | 0.5372675                  | 0.1059222                 | 0.1531305                  | 0.5601571                 | 0.1454591          |               |
| 0.2278656          | 0.0385108                  | 0                         | 0.07611427                 | 0                         | 0.02356906         | 0.2564929 0 0 |
| 0.06653467         | 0.08275802                 | 0.1685040.4922979         | 0                          | 0.04756104                | 0                  | 0.2770869     |
| 0                  | 0.04469052                 | 0.04961715                | 0.1717066                  | 0.01504172                | 0.1213615          | 0.47665 0     |
| 0.02544544         | 0.03876754                 | 0.08117156                | 0.01831345                 | 0.1161698                 | 0.265871           |               |
| 0.1097194          | 0.03550141                 | 0.2388222                 | 0.02610023                 | 0.08403368                | 0.4276906          |               |
| 0.02059182         | 2.6690541.4979420.09075637 | 0.01635301                | 0.0862779                  | 0.04528918                |                    |               |
| 0.01891304         | 0                          | 0.7410294                 | 0.02510851                 | 0.03570193                |                    |               |
| TCGA-G2-A2EC 696 1 | 0.2675659                  | 0.2341064                 | 0.0882140.1687460.03732865 |                           |                    |               |
| 65.923230.04237307 | 0.1149133                  | 0.08878166                | 0.3348706                  | 0.2643961                 |                    |               |
| 2.4353050.3586091  | 0.4734152                  | 0.08544051                | 0.07545997                 | 0.2015373                 |                    |               |
| 0.09698288         | 0.6622826                  | 0.06521535                | 0.0998023                  | 0.04998794                | 1.60228340.3052    |               |
| 0.06719158         | 0.0784496                  | 0.3359579                 | 0.1746414                  | 0.5389324                 | 1.003074           |               |
| 0.3223521          | 0.1216638                  | 0.2351705                 | 0.7733559                  | 0.3158578                 | 0.2723027          |               |
| 0.4566108          | 0.1791294                  | 0.2603484                 | 0.02828114                 | 0.1156330.06618468        |                    |               |
| 0.1884791          | 0.05626701                 | 2.4811640.2700690.1145142 | 0.1208115                  | 0.4899386                 |                    |               |
| 0.09510572         | 6.2144840.4206302          | 1.4683960.6128508         | 0                          | 0.3790294                 | 0                  |               |
| 0.2016170.2794464  | 0                          | 0.2867479                 | 0.2172704                  | 0.1567803                 | 0.322844           |               |
| 0.06162703         | 0.1823027                  | 0.5927375                 | 1.4928060.03235617         | 0.4627568                 |                    |               |
| 0.2705735          | 0.3828451                  | 1.8951474.14348           | 0.06898335                 | 0.2081231                 | 0.2081482          |               |
| 0.4840452          | 0.2137362                  | 0.1100213                 | 0.1982280.09247098         | 0.2416614                 | 0                  |               |
| 0.07077635         | 0.1142389                  | 0.1546712                 | 0.06282637                 | 0.0442201                 | 0                  | 0.2192267     |
| 0.1763378          | 0.07605662                 | 0.06204431                | 0.4553073                  | 0.2194925                 | 0.2435853          |               |
| 0.4426039          | 2.2559420.008575752        | 0.07487339                | 0                          | 1.1458053.1026390.7486135 |                    |               |
| 0                  | 0.3683094                  | 0.2353233                 | 0.1925373                  | 0.4598890.07205782        | 0.03577975         |               |
| 0.06137309         | 1.1078510.2014701          | 0.3660673                 | 0.02153038                 | 0.1228920.2146785         |                    |               |
| 0.3912099          | 0.9056535                  | 0.7039117                 | 0.1326603                  | 0.3742836                 | 0.1377163          |               |
| 2.0473130.1276015  | 0.7116926                  | 0.07839017                | 0.5653121                  | 0.02566345                |                    |               |
| 1.7491330.1931001  | 0                          | 0.6461250.1413593         | 0.2126729                  | 0.09581021                |                    |               |
| 0.2106821          | 0.4185883                  | 0.3500078                 | 0.6319903                  | 0.06830035                | 0                  | 0.06040574    |
| 0.6675808          | 0.9192877                  | 0.9006530.2775990.1925373 | 0.5541341                  | 0.8510933                 |                    |               |
| 0.3979809          | 0.3033188                  | 0.1559298                 | 0.03211515                 | 0.6177613                 | 0.5612819          |               |
| 0.3119402          | 0.1928448                  | 0.2450563                 | 1.2878390.7286473          | 1.1811480.6205889         |                    |               |
| 1.4560280          | 0.1986848                  | 0.08464215                | 0.2917372                  | 0.1017454                 | 0.2786581          |               |
| 0.1530515          | 0.3482873                  | 0.3408881                 | 0.2215739                  | 0.1228086                 | 0.8412604          |               |
| 0.4475457          | 0.1762777                  | 0.1877950.09377835        | 0.6051171                  | 0.07580588                |                    |               |
| 0.09288602         | 0.02632952                 | 0.4106152                 | 0.1227462                  | 0.08371766                | 0.7862198          |               |

|              |              |             |             |              |             |
|--------------|--------------|-------------|-------------|--------------|-------------|
| 0.1290615    | 0.5646566    | 0.3707439   | 1.2625460   | 0.1006175    | 0.09475735  |
| 0.5806679    | 0.3154726    | 0.1426636   | 0.2630183   | 0.1728906    | 0.05612314  |
| 0.03036239   | 0.1950519    | 0.1138339   | 0.2073648   | 0.09939964   | 1.12747     |
| 0.7457660    | 0.2249457    | 1.3507670   | 0.1248876   | 1.0175150    | 0.01917269  |
| 0.1441658    |              |             |             |              |             |
| 4.8526920    | 0.0601949    | 0.04538378  | 0.04320991  | 0.2009335    | 0.09939964  |
| 0.1147173    | 0.03946416   | 0.09817365  | 0.5031759   | 0.2328489    | 0.09423955  |
| 0.1316476    | 0.3430456    | 0.2191339   | 0.06684433  | 0.02650759   | 0 0.067897  |
| 0.008921799  | 0.03788629   | 1.3429140   | 0.1331725   | 0.03018525   | 0.1839556   |
| 0.2599875    | 0.1086238    | 0.3403044   | 0.5046331   | 0.8460222    | 0.1474003   |
| 0.2428358    | 0.3096201    | 0.2242956   | 1.7388940   | 0.4152680    | 0.9094485   |
| 10.01471     |              |             |             |              |             |
| 0.1076619    | 0.7177683    | 0.2046984   | 0.3760775   | 0.2617538    | 0.04623549  |
| 0.4395317    | 0.05106096   | 0.1270568   |             |              |             |
| TCGA-FD-A3B7 | 122 1        | 0.1171045   | 0.03756882  | 0 0.2707994  | 0.1078274   |
| 22.890750    | 0.2039978    | 0.2468258   | 0.5342799   | 0.4030442    | 0 1.710239  |
| 0.1569510    | 0.3473029    | 0.03164143  | 0.1536193   | 0.1663314    | 0.4778933   |
| 1.4284230    | 0.06279361   | 0.2114116   | 0.1443950   | 0.9447227    | 25.879940   |
| 0.102436     |              |             |             |              |             |
| 0.2140198    | 0.2156548    | 0.1681562   | 0 0.4236077 | 0.1939886    | 0           |
| 0.5786737    | 0.2730338    | 0.1310092   | 0.1373381   | 0.2029176    | 0.249795    |
| 0.2506805    | 0.1143699    | 0.06759869  | 0.05462309  | 0.03024667   | 0.08126633  |
| 0.1514172    | 0.1485944    | 0.0441047   | 0.08724389  | 0 0.09157401 | 1.544344    |
| 0.0934639    | 0.5113988    | 0.7867905   | 0 0.2519922 | 0.4504183    | 0.1064584   |
| 0.1921924    | 0.1245407    | 0.1183284   | 0.1307513   | 0 0.01858374 | 0.1093078   |
| 0.1053198    | 0.2989519    | 3.3664750   | 0.03115463  | 0.2761294    | 0.08063895  |
| 0.1457368    | 1.1556890    | 0.3594247   | 0.1549839   | 0.1548503    | 0.01466478  |
| 0.06658148   | 0.09003713   | 0.1059357   | 0.1908669   | 0.1780742    | 0.2538408   |
| 0.1074784    | 0.5906169    | 0.2240672   | 0.1489275   | 0.03024667   | 0.681248    |
| 0.05806091   | 0 0.08829058 | 0.03661614  | 0.1385975   | 0.3101884    | 0 0         |
| 0.3454734    | 1.0232530    | 0.09358268  | 0.0480620   | 0.07219748   | 0.08486586  |
| 0.1163931    |              |             |             |              |             |
| 0.2936650    | 0.06082571   | 0.06709261  | 0.1510565   | 0.1059357    | 0.2952075   |
| 0.1618913    | 0.1722554    | 0 1.6462630 | 0.03879771  | 0.07832745   | 0.04975407  |
| 0.2366568    | 0.1033532    | 0.06278042  | 0.7742502   | 0.2420615    | 0.063867    |
| 0.05544381   | 0.06931482   | 0.8448372   | 0.07560806  | 0.6607905    | 0 0.5700643 |
| 0.09884179   | 0.1181880    | 0.1987521   | 0 0.4574496 | 0.22685      | 0.05895048  |
| 0.03075078   | 0.08693937   | 0.08060884  | 0.2144611   | 0.2681621    | 0.09864606  |
| 0 0          | 0.03571058   | 0.03540601  | 0.1927128   | 0.2338792    | 0.1589035   |
| 0.6190885    |              |             |             |              |             |
| 0.04313096   | 0.2554680    | 0.04172216  | 0.09008365  | 0 0.8426631  | 0.7002461   |
| 0 0          | 0.2064617    | 0.3234822   | 0.2429895   | 0.3077976    | 0 0.7477112 |
| 0 0          |              |             |             |              |             |
| 0.1817413    | 0.1629980    | 0.1685422   | 0.09796708  | 0 0.3242095  | 0.02163573  |
| 1.3427560    | 0.07111529   | 0.08446297  | 0.4786485   | 0.3187674    | 0.1697317   |
| 0 0          |              |             |             |              |             |
| 0.1234044    | 0.2233478    | 0.4744406   | 0.02981224  | 0.1014071    | 1.807393    |
| 0.2068291    | 0.5642618    | 1.5140480   | 0.06213441  | 0.6004590    | 0.1644498   |
| 0.4138422    |              |             |             |              |             |
| 0.07750488   | 0.1520643    | 1.3138970   | 0.6075154   | 0.05283303   | 0.1135264   |
| 0.08323519   | 0.06484683   | 0 0.1252058 | 0 0 0       | 0.04785424   | 1.328434    |
| 0.6582329    | 0.1443950    | 0.06049333  | 0.07652267  | 0.5698428    | 0.03692145  |

|              |            |            |             |            |            |            |            |
|--------------|------------|------------|-------------|------------|------------|------------|------------|
| 0.1041092    | 0.02199393 | 0.06289932 | 0           | 0          | 0.3181584  | 0.3150829  |            |
| 0.09570847   | 0          | 0.1899934  | 0           | 0.23229    | 0.6527174  | 0.4537     | 0.2897347  |
| 0.1501394    | 0.02109964 | 0          | 0.01531394  | 0.1133476  | 0          | 0.1718098  |            |
| 0.06566291   | 0.4763850  | 0.08548479 | 0.01937622  | 0.4428112  | 0.08344432 |            |            |
| 0.06972673   | 0.1706036  | 0.1093261  | 0.02088732  | 0          | 0.2468081  | 0.5366204  |            |
| 0.07198882   | 0.8434234  | 0.2352043  | 0.5513518   | 3.9164660  | 0.03071523 |            |            |
| 0.6350779    | 0          | 0.3621120  | 0.1584212   | 0.02225928 | 0.1336452  | 0          | 0.2691448  |
| TCGA-FD-A5C0 | 550        | 1          | 0.07196604  | 0.2462693  | 0          | 0.2662697  | 1.303208   |
| 36.096640    | 0.1150719  | 0.05253428 | 0.6935291   | 0.0142227  | 1.597321   |            |            |
| 0.1543257    | 0.1867542  | 0.02333411 | 0.2832182   | 0.06814547 | 0.33082    |            |            |
| 0.2194577    | 0.02572635 | 0.09448875 | 0.05915817  | 1.96452313 | 7.88120    | 0.1259032  |            |
| 0.1083146    | 0.1987945  | 0          | 4.282365    | 1.6660870  | 0.5722309  | 0.1079871  |            |
| 0.06184718   | 0.2745682  | 0.5693286  | 0.06138216  | 0.5819429  | 0.08772021 |            |            |
| 0.2496746    | 0.06024471 | 0.1498787  | 0.03356837  | 0.0743518  | 0.03329457 |            |            |
| 1.6749490    | 0.3196129  | 0.1084174  | 0.04467944  | 0          | 0.3751759  | 2.789226   |            |
| 0.03829188   | 0.2957909  | 0.1654142  | 0.9974602   | 0.2136009  | 0          | 0.2976128  |            |
| 0.6614212    | 0          | 0          | 0.2892695   | 0.7730898  | 0.4921221  | 0.1113179  |            |
| 0.08629839   | 0.6346675  | 0.2789463  | 0.006381979 | 0.1311272  | 0.4879389  |            |            |
| 0.2423439    | 0.8971239  | 3.5783010  | 0.05442552  | 0.1903251  | 0.5287142  |            |            |
| 0.08183468   | 0.07904558 | 0.06510229 | 0.1919395   | 0.05471734 | 0.4679901  | 0          |            |
| 0            | 0.09513784 | 0          | 0.0371759   | 0.6803190  | 0          | 0.05843231 | 0.02250228 |
| 0.4288095    | 0.1880832  | 0.5195163  | 0.7495041   | 1.8472440  | 0.6839964  | 0.0879577  |            |
| 0            | 0          | 2.9553890  | 0.9537182   | 0.1640641  | 0.2616611  | 0.2297181  | 0.2254468  |
| 0.1627557    | 0.4924214  | 0          | 0.1270305   | 0          | 3.1176990  | 0.2384295  | 0.2888147  |
| 0.03567216   | 0.09695757 | 0.08468701 | 0.2314885   | 0.4611965  | 0.6545343  |            |            |
| 0.07849834   | 0          | 0.06667373 | 1.1577360   | 0.7520107  | 0.7421662  | 0.5243655  |            |
| 0.03037138   | 4.6847590  | 0.1654830  | 1.0008      | 1.0595130  | 0.2173665  | 0          | 0.2493316  |
| 0.09907558   | 0.07531206 | 0.3929793  | 0           | 0.06289544 | 0.1429742  | 0.2633493  |            |
| 0.5222065    | 0.03947692 | 0.1642621  | 0.06510229  | 0.5556689  | 0          | 1.255974   |            |
| 0.1025607    | 0.1845350  | 0.1520266  | 0.7920131   | 0.5356842  | 0.6064859  |            |            |
| 0.09780944   | 0.3625146  | 0.5301187  | 0.5552480   | 0.9938684  | 0.07730898 |            |            |
| 0.8041294    | 0          | 0.10581    | 0.05008483  | 0.2762049  | 0.1505130  | 0.07328391 |            |
| 0.08694172   | 0.02659227 | 0.2933990  | 0.1453377   | 0.4977944  | 0.406305   |            |            |
| 0.2433850    | 0.7037783  | 0.08508612 | 0.9190274   | 0.2691372  | 0.03664196 |            |            |
| 0.0623193    | 0.4165218  | 0.1452638  | 0.1486134   | 0.2212965  | 0          | 0.8185297  |            |
| 0.3795983    | 0.4450685  | 0.09526053 | 0.1869008   | 0.3607752  | 0.1555607  |            |            |
| 0.08441756   | 0.1717345  | 0          | 0.06452119  | 0          | 0.3847233  | 0.4041499  |            |
| 0.04090094   | 0.1176344  | 0.5144089  | 0.4780620   | 0.3105804  | 0.8922216  |            |            |
| 0.08061713   | 0.2580379  | 0.03403486 | 0           | 3.8566430  | 0.1159635  | 0.07123759 | 0          |
| 0.3218606    | 0.1426768  | 0.0882258  | 0.1357621   | 0          | 0          | 0.3344494  |            |
| 0.8155828    | 0.2230554  | 0.06677067 | 0.0369070   | 0.1815337  | 0          | 0.05646668 |            |
| 0.04643816   | 0.08035264 | 0.05279247 | 0           | 1.5474470  | 0.04763027 | 0.05442552 |            |
| 0.1139563    | 0.05142029 | 0.3661208  | 0.2239528   | 0.02567241 | 0.04984022 |            |            |
| 0.2022330    | 0.03664196 | 0.0294936  | 0.4670030   | 0.02890874 | 0.9168361  | 3.768295   |            |



|              |            |            |            |            |            |             |            |
|--------------|------------|------------|------------|------------|------------|-------------|------------|
|              | 0.07078463 | 0.06887369 | 0.06056252 | 0.2543249  | 0.01770127 | 0           | 0.04106553 |
|              | 0          | 0.02004869 |            |            |            |             |            |
| TCGA-FD-A5BS | 1639       | 0          | 0.13448427 | 0          | 0          | 0.12439576  | 0.1651071  |
|              | 44.6522327 | 0.18741887 | 0.4887204  | 0.14725768 | 0          | 0           | 2.45440509 |
|              | 0.07209781 | 0.69798218 | 0.08720977 | 0.29561994 | 0.25468942 | 0.34064604  |            |
|              | 0.23434556 | 0.0641004  | 0.08828644 | 0.11054997 | 1.16090684 | 46.39582285 |            |
|              | 0.06191516 | 0.31807213 | 0.4953213  | 0          | 0.51080009 | 1.6345603   | 0.71289234 |
|              | 0          | 0          | 0.51309068 | 0.08597293 | 0.0286765  | 0.31071072  | 0.05464146 |
|              | 0.30773866 | 0.0750536  | 0.04870976 | 0          | 0.34735647 | 0.12443635  | 1.89346228 |
|              | 0.25597141 | 0          | 0.40076785 | 1.08351535 | 0.21032945 | 5.2122791   | 0.07155674 |
|              | 0.34546866 | 0.19022314 | 0          | 0.33928602 | 0.89659426 | 0.13424422  | 1.50086941 |
|              | 0          | 0.09059321 | 0.24025033 | 0.17336246 | 0.20565736 | 0.05738535  | 0.0806337  |
|              | 0.12484367 | 0.60815076 | 0.02385225 | 0.07207056 | 0.12822475 | 0.01969011  |            |
|              | 0.27941202 | 1.73362456 | 0.15255896 | 0.48119255 | 0.11227477 | 0.18351118  |            |
|              | 0.35451347 | 0.06082893 | 0.03985344 | 0          | 0.58302788 | 0           | 0.05217475 |
|              | 0.29007163 | 0.17103023 | 0          | 0.19558841 | 0          | 0           | 0.07799538 |
|              | 0.07683931 | 0.16148831 | 0          | 0.5386969  | 0.30697133 | 1.56682176  | 0.23390857 |
|              | 0.16558498 | 0          | 0.32487002 | 1.06933851 | 1.65558358 | 0.13970601  | 0.02201428 |
|              | 0.22303942 | 0          | 0.75068695 | 0          | 0.15825618 | 0           | 2.06421457 |
|              | 0.01904606 | 0          | 0.31651237 | 0.28839123 | 1.97860524 | 0           | 0.14669131 |
|              | 0.04153148 | 1.04828526 | 0.02170731 | 0.84317775 | 0          | 3.45496208  | 0.45404453 |
|              | 0.74650737 | 0.16198345 | 0          | 1.05068155 | 0.10420694 | 0.07838885  | 0          |
|              | 0.33280751 | 0          | 0.07036852 | 0.66329983 | 0          | 0.05876693  | 0.40076785 |
|              | 0.08132141 | 1.69673893 | 0          | 0          | 0.20580679 | 0.09906426  | 0.22003696 |
|              | 0.20690637 | 0          | 0.91079977 | 0.34035464 | 0          | 0.12185221  | 0.13548753 |
|              | 0.0707456  | 1.30607342 | 0.14446871 | 0.7871241  | 0          | 0.04393979  | 0.04679723 |
|              | 0.46084751 | 0.28126652 | 0          | 0.27078268 | 0.12423368 | 0.75388525  | 0          |
|              | 0.09699832 | 0.08456705 | 0.47454352 | 0.0649740  | 0.20765739 | 0.09678383  |            |
|              | 1.69509957 | 0.67058884 | 0.1369470  | 0.05822861 | 1.03781606 | 0           | 0.74057748 |
|              | 0.53572331 | 0.03567796 | 0.38114665 | 0.23952494 | 1.00993082 | 0.02225189  | 0          |
|              | 1.28416634 | 0          | 0.02426964 | 0.14040399 | 0          | 0.04964727  | 0          |
|              | 0.12587373 | 0.22929704 | 0.32973839 | 1.17453996 | 0.1374405  | 0.33164992  |            |
|              | 1.66731105 | 0.12554227 | 0.57404787 | 0.04240104 | 0.31882751 | 1.04961463  |            |
|              | 0.14446871 | 0          | 0          | 0.42721006 | 0.19044478 | 0.1099128   | 0.08456705 |
|              | 0.17455259 | 0.14474285 | 0.0152437  | 0.41943748 | 0          | 0.04159186  | 0.06896879 |
|              | 0          | 0          | 0.01172448 | 0          | 0.15015646 | 0.01973085  | 0.25136033 |
|              | 0          | 0.30511792 | 0.08518088 | 0.03203002 | 0.13061555 | 0.08370097  | 0          |
|              | 0.19890347 | 0.0684735  | 0          | 0.82474671 | 0.43217836 | 0.59593344  | 9.17716204 |
|              | 0.02645531 | 1.58736827 | 0          | 0.11881539 | 0.52925919 | 0           | 0.84413912 |
|              | 0.02823075 | 0.14986146 |            |            |            |             |            |
| TCGA-CU-AOYN | 393        | 1          | 0.1377520  | 0.1031166  | 0.04995711 | 0.5478988   | 0.1056993  |
|              | 24.6103    | 0          | 0.09010716 | 0.2262536  | 0.0948215  | 0.1361201   | 0.4446232  |
|              | 0.5169475  | 0.9447445  | 0.1488813  | 0.06349093 | 0.1304389  | 0.006461538 |            |
|              | 0.9601588  | 0.05745068 | 0.02260791 | 0.05661806 | 1.87394523 | 9.944480    | 0.05073566 |

|              |             |            |            |            |            |            |
|--------------|-------------|------------|------------|------------|------------|------------|
| 0.6664104    | 0.2536783   | 0.04945122 | 0          | 0.4982967  | 0.09127678 | 0.1722507  |
| 0.1775748    | 0.9927202   | 0.1706199  | 0.1174931  | 0.2784778  | 0.2658534  |            |
| 0.08134609   | 0.3587605   | 0.1387658  | 0.1606351  | 0.1778983  | 0.03186498 |            |
| 2.6123470    | 0.3932865   | 0.2594054  | 0          | 0.3329528  | 0.4667867  | 2.038606   |
| 0.2565341    | 0.6631550   | 0.4871131  | 0.7623970  | 0.2657582  | 0          | 0.07120851 |
| 0.2319861    | 0.2153269   | 0.0295958  | 0.01987306 | 0.1653179  | 0.1238894  |            |
| 0.1918157    | 0.5784328   | 0.01832386 | 0.16979    | 0.1678238  | 0.1714326  | 1.18058    |
| 0.7610349    | 0.07813292  | 0.06428929 | 0.01725042 | 0.06265671 | 0.09078186 |            |
| 0.06230695   | 0.3673962   | 0.1571037  | 0.2985971  | 0.08428578 | 0.1870487  |            |
| 0.06229931   | 0.5255578   | 0.07115931 | 0.3005112  | 0.1365960  | 0.159781   |            |
| 0.1507526    | 0.008432823 | 0.6373233  | 0.03551496 | 0          | 0.1750130  | 0.8657972  |
| 0.1197960    | 0.08480418  | 0.2547813  | 0.06655274 | 1.5973440  | 0.6908859  | 0.3219763  |
| 0.07892214   | 0.2919196   | 0.2492278  | 1.0045660  | 0.08161517 | 0.04052537 |            |
| 0.03475664   | 1.9365270   | 0.09127678 | 0.6449651  | 0          | 0.09279444 | 0.4863045  |
| 0.1846241    | 0.9045465   | 0.3986373  | 0.07512781 | 0.03260973 | 0.1949778  |            |
| 2.52447      | 0.1334085   | 1.6697530  | 0.0443937  | 1.5661190  | 0.08720192 | 0.1042699  |
| 0.4072565    | 0           | 1.2053560  | 0.3202169  | 0.1094912  | 0.1446906  | 0.170447   |
| 0.1422323    | 0.4685092   | 0.5823572  | 0          | 0          | 0          | 0.8329736  |
| 0.1965114    | 0.06230695  | 0.4647347  | 0          | 0.4507668  | 0.2453923  | 0.07064459 |
| 0.1818737    | 0.4664652   | 0.8442183  | 0          | 0.1872195  | 0.1734745  | 0.2536783  |
| 0.3542713    | 0.1227347   | 0.3329528  | 1.1360790  | 0.1457704  | 0.2587928  | 0          |
| 0.8024768    | 0.05762015  | 0.1753432  | 0.07627459 | 0.03817569 | 0.6318026  |            |
| 0.08365409   | 0.09935519  | 0.4331093  | 0.3402518  | 0.2662110  | 0.07090102 |            |
| 0.1416221    | 0.5083209   | 1.3737660  | 0.07013727 | 0.2982173  | 0.3321978  |            |
| 0.3823230    | 0.3318753   | 0.6065025  | 0          | 0.3878393  | 0.3302720  | 0.5628735  |
| 0.1253591    | 0.1431006   | 0.7070109  | 0.02977627 | 0.1553709  | 0.1900419  |            |
| 0.1468664    | 0.3886668   | 0          | 0.4418450  | 0.06446611 | 0.03914475 | 0.05629173 |
| 0.3578992    | 0.6687052   | 0.2547813  | 1.3876070  | 0.3857781  | 0.4703969  |            |
| 0.05428913   | 0.0408218   | 0.8767675  | 0.1109843  | 0.1022682  | 0          | 0.1871275  |
| 0.4291588    | 0.1407293   | 0          | 0.08939693 | 0.1111949  | 0.7807046  | 1.027281   |
| 0.1601084    | 0.08520493  | 0.07064459 | 0.1240993  | 0.3028408  | 0.07806086 |            |
| 0.06666631   | 0           | 0          | 0          | 1.4810030  | 0.05027858 | 0.1025666  |
| 0.09022277   | 0.3886259   | 0.3286498  | 0.1474206  | 0.09540039 | 0.1782694  | 0.6771520  |
| 0.2805491    | 0.08468163  | 1.1443910  | 0.08300239 | 0.8393185  | 3.17604    | 0.1264579  |
| 0.2636656    | 0           | 0.3042559  | 0.0762355  | 0.02618395 | 0.4585265  | 0          |
| 0.1151271    |             |            |            |            |            |            |
| TCGA-FD-A5BZ | 835         | 1          | 0.09099128 | 0.1362262  | 0.06599777 | 0.1683309  |
| 0.3351315    | 37.516950   | 0.06340326 | 0.05290647 | 0.0996337  | 0.3758028  |            |
| 0.07193067   | 2.4220630   | 0.2926858  | 0.5734473  | 0.08850844 | 0.2516315  |            |
| 0.04308035   | 0.05121759  | 1.1495370  | 0.02168498 | 0.1194682  | 0          | 1.447555   |
| 23.552240    | 0.03351315  | 0.07825664 | 0.1675658  | 0.1959883  | 1.3824181  | 0.053271   |
| 0.6632159    | 0.2730701   | 0.2736908  | 1.00289    | 0.1526931  | 0.1940235  |            |
| 0.4204502    | 0.1386379   | 0.2283640  | 0.05924431 | 0.1277074  | 0.08488529 | 0          |
| 0.1683858    | 2.9543870   | 0.3463776  | 0.1028093  | 0.1016840  | 0.4398601  | 1.04359    |

|                            |                            |                                    |                   |                           |                    |
|----------------------------|----------------------------|------------------------------------|-------------------|---------------------------|--------------------|
| 3.1098880.2420744          | 0.7947232                  | 1.0618070                          | 0.4996283         | 0                         | 0.2189624          |
| 0.5376068                  | 0                          | 0.1225897                          | 0.1219140.3909868 | 0.3150489                 | 0.1019198          |
| 0.3818941                  | 0.2956398                  | 0.4114713                          | 0.008069146       | 0.1560401                 | 0.2891871          |
| 0.3064109                  | 0.3780971                  | 1.6756580.2408479                  | 0.2264849         | 0.1975076                 |                    |
| 0.0620813                  | 0.1199309                  | 0.2880955                          | 0.1617876         | 0.06918265                | 0.4602189          |
| 0.1948607                  | 0.2118068                  | 0.1582748                          | 0                 | 0.09400775                | 0.5293360.1804554  |
| 0.05467188                 | 0.0949882                  | 0.02845108                         | 0.2339507         | 0.7841160.04691842        |                    |
| 0.07289584                 | 0.7484859                  | 1.5622561.0821640.03734461         | 0                 | 1.4507140.7235083         |                    |
| 0.4563608                  | 0.2363107                  | 0.1117105                          | 0.2850469         | 0.1234695                 | 0.6717525          |
| 0.2515820.05353761         | 0.0918332                  | 4.3465390.06029236                 | 0.3651669         | 0.03865937                |                    |
| 0.06129484                 | 0.1070752                  | 0.1463429                          | 1.8397040.1504672 | 0.1985010                 |                    |
| 0.1592331                  | 1.3732550.1028093          | 2.2629410                          | 0.7601511         | 0                         | 2.02033            |
| 0.1295238                  | 0                          | 0.5687081                          | 0.2820233         | 0.1542908                 | 0.1433618          |
| 0.2505352                  | 0.5237203                  | 0.7693454                          | 0.05109926        | 0.1590455                 | 0.4067358          |
| 0.1109898                  | 0.3301296                  | 0.3493925                          | 0                 | 0.0411565                 | 0.2658365          |
| 0.6451282                  | 0                          | 0.04666388                         | 0                 | 0.3851512                 | 0.8940359          |
| 0.3710002                  | 0.2750102                  | 0.5864802                          | 0.4201577         | 2.0024710.3909868         |                    |
| 0.3389041                  | 0                          | 0.1932412                          | 0                 | 0.1371950.07612132        | 0                  |
| 0.4173336                  | 0                          | 0.1575084                          | 0.2288703         | 0.2385117                 | 0.04396104         |
| 0.1870954                  | 0.5055391                  | 0                                  | 0.09265755        | 0.1181914                 | 0.1755451          |
| 0.5637043                  | 0.7821663                  | 0.0241395                          | 0.4037883         | 0.3552881.6881860.0903330 |                    |
| 0.4995942                  | 0.1573483                  | 0.08210349                         | 0.2714187         | 0.06467451                | 0.05758467         |
| 0.7539670                  | 0                          | 0                                  | 1.6426490.4184615 | 0.3365886                 | 1.0340850.1189176  |
| 0.6991155                  | 0.07172076                 | 0.1617876                          | 0.9759997         | 0                         | 0.04503513         |
| 0.6883903                  | 0.2233467                  | 0.2230991                          | 0.05721758        | 0.2952532                 | 0.04896609         |
| 0.7013384                  | 0.4439471                  | 0.2820233                          | 0.1125633         | 0                         | 0.1311569          |
| 0.1031253                  | 0.05871474                 | 0.20319                            | 0                 | 0.3968275                 | 1.4277430.03321123 |
| 0.0903330.2064410.1873069  | 0.1408636                  | 0.1472895                          | 0.6984563         | 0.3895114                 |                    |
| 0.03150809                 | 0.2960693                  | 0.09265755                         | 0.1118719         | 0.5061101                 | 0.1462047          |
| 1.2096156.4397550.07756455 | 0.1161086                  | 0.07657308                         | 0.1607796         | 0.1119043                 |                    |
| 0                          | 0.1211508                  | 0.03820152                         | 0.02534885        |                           |                    |
| TCGA-UY-A9PE               | 189                        | 0                                  | 0                 | 0.1710961                 | 0                  |
| 0.1938095                  | 0.2919864                  | 0.1835545                          | 0.02634999        | 1.1475960.4288722         |                    |
| 0.8402718                  | 0.0864609                  | 0.3592611                          | 0.0631256         | 0.1000655                 | 0.2323332          |
| 0.01588749                 | 0.3938774                  | 0.3288026.31509581.633180.06138349 | 0                 | 0.368301                  |                    |
| 0.09572717                 | 2.5320692.3922020.08834634 | 0.06668824                         | 0.05729126        | 0.2826026                 |                    |
| 0.3622474                  | 0.0568605                  | 0.3080426                          | 0.09480144        | 0.3149379                 | 0.2604319          |
| 0.04527327                 | 0.02073039                 | 0.2066242                          | 0                 | 6.0913320.6767290.3515081 |                    |
| 0.0496658                  | 1.93358                    | 0.1390156                          | 3.7540850         | 0.4110025                 | 0.04714742         |
| 1.3257040                  | 0.1473513                  | 5.2516990                          | 0.1796306         | 0.5359214                 | 0.05729126         |
| 0.2885255                  | 0.1991240.0799413          | 0.6188581                          | 0.4306632         | 0.02364743                |                    |
| 0.1143227                  | 0.2542474                  | 1.0150930.6232786                  | 3.2737860.1512489 | 0.1866759                 |                    |
| 0.1669660.2425805          | 0.0292891                  | 0.1809198                          | 0.6716907         | 0                         | 0.3853476          |
| 0.2069069                  | 0.09276799                 | 0.5086847                          | 0                 | 0.3878178                 | 0                  |

|              |             |            |            |            |            |            |            |
|--------------|-------------|------------|------------|------------|------------|------------|------------|
| 0.04168934   | 0.03808974  | 0.3861274  | 0.1374990  | 0.5225381  | 0.6131713  |            |            |
| 0.1065486    | 0           | 0          | 0.3864964  | 2.1203122  | 3.708630   | 0.06925317 | 0.1418641  |
| 0.4913870    | 0.06030659  | 2.04066    | 0.05266328 | 0          | 0          | 3.6530790  | 0.3567192  |
| 0.009441257  | 0.08981528  | 0.8629348  | 0.2859148  | 0.6318085  | 0.5511987  | 0          |            |
| 0            | 0.08234969  | 1.3930820  | 1.8111980  | 1.0133510  | 0.6728155  | 0.2773870  |            |
| 2.2708170    | 0.6198727   | 0.1554314  | 0.2100680  | 0.06598993 | 0.2753318  | 0.3488213  |            |
| 1.8084110    | 0.07487571  | 0          | 0.06622107 | 0.08131663 | 0.1612462  | 0.5119645  | 0          |
| 0.06030659   | 0.3709809   | 0          | 0.4362950  | 0.2051297  | 0.07041384 | 0.677234   |            |
| 0.5954682    | 1.7098550   | 1.208059   | 0.4701343  | 0.6138349  | 0.4597943  |            |            |
| 0.5702127    | 0.1432282   | 0.6384805  | 0          | 0.08712496 | 0.1391861  | 0.7675755  |            |
| 0.05577025   | 0.1357710   | 1.476516   | 0          | 0.1019198  | 0          | 0.1346316  | 0.08384087 |
| 0.3763749    | 0           | 0.4803732  | 0.1713442  | 1.6363190  | 1.662076   | 0          | 0          |
| 0.1345631    | 0.1835545   | 0.8199794  | 0          | 0.5270344  | 0.2100680  | 0.9129122  |            |
| 0.3088514    | 0.2077595   | 1.46411    | 1.0951710  | 0.08421433 | 0.1491411  | 0          |            |
| 0.1371155    | 0           | 0.4989362  | 0.8735499  | 0          | 0          | 0.3057505  | 0.2725206  |
| 0.8220051    | 0.9642464   | 0.2240356  | 0.3870006  | 0          | 0.03951121 | 0.9237425  |            |
| 0            | 0.2639597   | 0          | 0.3789583  | 0.3398570  | 0.1634535  | 0          | 0.1730537  |
| 0.07174997   | 0.5289481   | 0.3746639  | 0          | 0.2474083  | 0          | 0.2882762  |            |
| 0.1465590    | 1.627332    | 0.04301733 | 0          | 0.01956142 | 0          | 0.8523249  | 0.04866439 |
| 0.1323649    | 0           | 0.04222472 | 0.04763246 | 0.09866206 | 0.3042681  | 0.04756256 |            |
| 0            | 0.6211658   | 0          | 0          | 0.6940641  | 0          | 0.7385202  | 5.0671540  |
| 0.1276003    | 0.1122025   | 0          | 0.01639733 | 0.05068664 | 0.4057651  | 0.0653061  |            |
| 0.3900083    |             |            |            |            |            |            |            |
| TCGA-GV-A40E | 261         | 1          | 0.07899852 | 0.05631971 | 0          | 0.1096085  | 0.04041122 |
| 67.696380    | 0.04587219  | 0.2679444  | 2.7392250  | 0.09063098 | 0.2862297  | 0.8525705  |            |
| 0.3176368    | 1.0982340   | 0.05692068 | 0.03734463 | 0          | 0.08028772 | 0.02867893 |            |
| 0.03137812   | 0.1080439   | 0.1623477  | 3.76375    | 48.338340  | 0.1636654  | 0.6086499  |            |
| 0.6667851    | 0.1417973   | 0.08334814 | 1.4097740  | 0.3951319  | 0.02828785 |            |            |
| 0.8651263    | 0.1052126   | 0.07018791 | 0.2281464  | 0.1203652  | 0.06803221 |            |            |
| 0.08572639   | 0.08494485  | 0.3582508  | 0.2040435  | 0.03045674 | 6.639477   |            |            |
| 0.0835346    | 0.1239707   | 0.04904549 | 1.3259930  | 0.5147973  | 2.6575690  | 0.03502811 |            |
| 0.4058692    | 0.2095135   | 0          | 0.9378955  | 0.1688064  | 0.04224509 | 0.777916   |            |
| 0.1400249    | 0           | 0.2352124  | 0          | 0.02279375 | 0.2633532  | 0.03947142 |            |
| 0.3666772    | 0.1701137   | 0.08173226 | 0.07055927 | 0.02092266 | 0.2313266  |            |            |
| 0.4787175    | 1.5760380   | 0.02489331 | 0.1228962  | 0.02198408 | 0.02994384 |            |            |
| 0.04338493   | 0           | 0.1170532  | 0.05005357 | 0.3329678  | 0.02014022 | 0.1787823  |            |
| 0.1190921    | 0.3348876   | 0.03400725 | 0.2872305  | 0          | 0          | 0.08399583 |            |
| 0.02058433   | 0.002686715 | 0.4603557  | 0          | 0.05274006 | 0.0878921  | 1.372496   |            |
| 0.2413822    | 0.02701879  | 0.04058692 | 0.06361153 | 0.5670789  | 0.3902086  |            |            |
| 0.03419411   | 0.07004611  | 0.5216434  | 0.1191067  | 0.3082029  | 0.02600276 | 0          |            |
| 0.06644122   | 2.7103110   | 0.3962968  | 0.01864667 | 0          | 0.5035473  | 0.3529297  |            |
| 0.4813076    | 0.8164716   | 0.07180763 | 0          | 0.2202448  | 1.2992560  | 1.275127   |            |
| 2.2976320    | 1.272953    | 1.1743690  | 0.02778271 | 0.2325443  | 0.4108838  | 0.1555832  |            |
| 0.8434923    | 0.4590979   | 0.1046524  | 0.1037221  | 0.03258287 | 0          | 0.3100182  |            |

|              |            |            |            |            |            |            |            |            |
|--------------|------------|------------|------------|------------|------------|------------|------------|------------|
| 0.8117384    | 0.2218216  | 0          | 0          | 0          | 0.07961613 | 0.8305795  | 0          | 0.05955337 |
| 0.4670930    | 0.09698692 | 0.4308458  | 0.1876380  | 0.3038514  | 0.03476719 | 2.006327   |            |            |
| 0.9800516    | 0          | 0.05964851 | 0.1658080  | 0.6061683  | 0.08080578 | 0.1583693  |            |            |
| 0.2475187    | 0.7005622  | 0          | 0.08603679 | 0          | 0.6226336  | 0.1101474  |            |            |
| 0.1340753    | 0.07953134 | 0.02432571 | 0.1845191  | 0          | 0.1804322  | 0.3311749  |            |            |
| 0.2654814    | 0.3180576  | 0.5082572  | 0.1252111  | 0.46402    | 0.5334281  | 0          |            |            |
| 0.02850379   | 0.3810201  | 0.1661031  | 0.2265775  | 0.2438416  | 0.0174649  |            |            |            |
| 0.6603847    | 0.1488187  | 0.3053502  | 0.07624847 | 0.4787175  | 0.2514476  |            |            |            |
| 0.1423017    | 0.1069232  | 0.1963711  | 0          | 0.1666498  | 0          | 0.3343352  | 0          | 0          |
| 0.3228239    | 0.1959344  | 0.06727922 | 0.4464561  | 0.5781233  | 0.1720736  |            |            |            |
| 1.0903       | 0.04151191 | 0.01950886 | 0.4066457  | 0.8486356  | 0.0977486  | 0          |            |            |
| 0.4485199    | 0.2672468  | 0.08070598 | 0.08279372 | 0.04272307 | 0.4959768  |            |            |            |
| 0.1865506    | 1.1160520  | 0.05101088 | 0.4479167  | 0.03376127 | 0.04744595 |            |            |            |
| 0.1447285    | 0.03443587 | 0.1486802  | 0.07350387 | 0.06760987 | 0.2296834  |            |            |            |
| 0.7651632    | 0.04805658 | 0.07624847 | 3.9331430  | 0.1772137  | 0.1215136  |            |            |            |
| 0.2435745    | 0.3960713  | 0.4227166  | 0          | 0.2823622  | 1.0390830  | 0.02697974 |            |            |
| 1.2393450    | 0.1322237  | 1.0939446  | 0.02688    | 0.06906814 | 1.4280750  | 0.1108011  |            |            |
| 0.05816194   | 0.04857758 | 0          | 0.3756536  | 0.00921292 | 0.1742287  |            |            |            |
| TCGA-BT-A2LD | 623        | 1          | 0.04712419 | 0.1847771  | 0.2848342  | 0.04358911 |            |            |
| 0.0482122    | 58.728770  | 0          | 0.1433336  | 0.1081264  | 0.03104395 | 0.3912118  |            |            |
| 0.2947415    | 0.4658622  | 0.2122145  | 0.2339066  | 0.03718537 | 0.0663137  |            |            |            |
| 0.2395057    | 0.04679419 | 0.2062411  | 0          | 1.1713832  | 7.862480   | 0.1518684  |            |            |
| 0.1350965    | 0.1446366  | 0          | 0          | 1.0909730  | 0.05204214 | 0          | 0          | 0.1331781  |
| 0.07531372   | 0.05024218 | 0.5897402  | 0.06382245 | 0.1275452  | 0.1534125  |            |            |            |
| 0.05156026   | 0.02442328 | 0.6085802  | 0          | 0.8575616  | 0.04983005 | 0.1183216  |            |            |
| 0.009752204  | 0          | 0.2456695  | 2.3912610  | 0.1671597  | 0.3631636  | 0.04165966 | 0          |            |
| 0.3613266    | 0          | 0.06860011 | 1.0827660  | 0.1058149  | 0.3858494  | 0.06749707 |            |            |
| 0            | 0.07121658 | 0          | 0.2916404  | 0.1522144  | 0.04178993 | 0.2441221  |            |            |
| 0.09152573   | 0.04599697 | 0.7751038  | 0          | 0          | 0.02443668 | 0          | 0.0178621  | 0          |
| 0.1420991    | 0.1163743  | 0.2388636  | 0.9363607  | 0          | 0          | 0.07650551 | 0          | 0          |
| 0            | 0          | 0          | 0.04555017 | 0          | 0.05128573 | 0.09431098 | 0.04049824 | 0          |
| 0.2672208    | 0.9150414  | 0.01476813 | 0          | 0          | 0.1897277  | 0.8847163  |            |            |
| 0.03581034   | 0.08158987 | 0.01285659 | 0.3328803  | 0          | 0.5939742  | 0.06204466 |            |            |
| 0.1848468    | 0          | 1.4759220  | 0.8930627  | 0.04449245 | 0.1587223  | 0.2772701  |            |            |
| 0.1263178    | 0.1701390  | 0.5844499  | 0.08566936 | 0          | 0.09297691 | 1.849657   |            |            |
| 0.06338655   | 1.1161640  | 0.0506228  | 0.8485346  | 0          | 0.7530367  | 0.3870006  | 0          |            |
| 0.4295268    | 0.1825741  | 0.03329452 | 0          | 0          | 0.1621896  | 0.3287680  | 0.4565485  |            |
| 0            | 0.06864109 | 0.07801763 | 0          | 0.3799409  | 0.3446659  | 0          | 0.03552478 |            |
| 0.1966802    | 0          | 0.2998428  | 0.2238596  | 0.04027854 | 0.04147865 | 0.2659586  |            |            |
| 0.4248241    | 0          | 0.2134891  | 0.2373787  | 1.2294110  | 0.1973997  | 0.1819431  | 0          |            |
| 0.2507396    | 0          | 0.1667986  | 0.0273301  | 0.1614841  | 0          | 0.1999464  |            |            |
| 0.2213962    | 0.01451077 | 0.06003783 | 0          | 0.7590846  | 0.1481643  | 0.4355037  |            |            |
| 0            | 0.08084949 | 0.01211204 | 0.4103112  | 0.7343088  | 0          | 0.06801232 | 0          |            |
| 0.07926703   | 0          | 1.3173410  | 0.2518826  | 0.3981349  | 0.2255159  | 0.05198141 |            |            |

|              |            |            |            |            |            |            |            |
|--------------|------------|------------|------------|------------|------------|------------|------------|
| 0.2855645    | 3.187362   | 0.2376802  | 0          | 0.1288532  | 0.1116493  | 0.1429018  | 0          |
| 0.5038424    | 0          | 0          | 0.4493321  | 0.2280095  | 0.3210672  | 0.3389527  |            |
| 0.4057201    | 0.190627   | 0.898471   | 0.02476268 | 0.09309941 | 0.4163065  | 0          |            |
| 0.1554906    | 0          | 0.2757581  | 0.2743473  | 0.03209515 | 0          | 0          | 0.29586    |
| 0.5964669    | 0.9094907  | 0          | 0.3400616  | 0          | 0.02830246 | 0          | 0.1780279  |
| 0.2280618    | 0          | 0          | 0.2055161  | 1.3693050  | 0          | 0.7721665  | 0.1243665  |
| 0.1356177    | 0.2687995  | 0.0325882  | 0.02801765 | 0.02719662 | 0.3368694  |            |            |
| 0.07997858   | 0          | 1.613005   | 0.06309925 | 0.8700795  | 1.552151   | 0.02060026 |            |
| 0.1002206    | 0          | 0.06938951 | 0.03863666 | 0          | 0.2240849  | 0          | 0.1641014  |
| TCGA-UY-A9PD | 542        | 0          | 0.04746552 | 0.05075875 | 0.1721384  | 0.1536669  |            |
| 0.2185263    | 30.787370  | 0.2414878  | 0.2165576  | 0          | 0.0234516  | 0.7423815  |            |
| 0.4453145    | 1.407709   | 0.2052015  | 0.4207158  | 0.05618206 | 0.7347342  |            |            |
| 0.3618608    | 0.08483963 | 0.07790059 | 0.1950902  | 4.252888   | 64.80368   | 0.0655579  |            |
| 0.02551407   | 0.3277895  | 0.4259882  | 1.033160   | 0.927176   | 0.4717718  | 0.05935283 | 0          |
| 0.5030352    | 0.2180953  | 0          | 0.8224779  | 0.1687474  | 0.1401481  | 0.04414963 |            |
| 0.04835209   | 0.1107008  | 0.06129882 | 0.1097979  | 9.171906   | 0.1505729  |            |            |
| 0.04469197   | 0.02946852 | 1.051658   | 0.3711734  | 3.421662   | 0.182897   | 0.02098071 |            |
| 0            | 0.6163563  | 0.1217109  | 0.1057607  | 2.1812160  | 0.07993599 | 1.37792    |            |
| 0.05098947   | 0.09244404 | 0.2848199  | 0.0711481  | 0.6058651  | 0.6899259  |            |            |
| 0.01052316   | 0.2034954  | 0.1005695  | 0.173738   | 0.3081781  | 4.079158   | 0.3140952  |            |
| 0.3138244    | 0.04953349 | 0.2158977  | 0.02606743 | 0.1073463  | 0.4923122  |            |            |
| 0.09022266   | 0.2572208  | 0          | 0.09207402 | 0.1155895  | 0.6036422  | 0          |            |
| 0.3451595    | 0          | 0          | 0.08258418 | 0          | 0.04842863 | 0.3268914  | 0          |
| 0.8074689    | 2.328427   | 0.1617667  | 0.04870196 | 0          | 0.8026282  | 1.651201   |            |
| 1.352615     | 0.1849069  | 0.01942456 | 0.3717361  | 0.1610194  | 0.7692126  |            |            |
| 0.2343527    | 0          | 0.3592853  | 4.000236   | 0.2358859  | 2.222371   | 0.9592319  |            |
| 0.907655     | 0.3816981  | 0.407007   | 0.4905693  | 0.1294348  | 0.2247282  | 0.1893366  |            |
| 1.594092     | 0.0574611  | 0.4215931  | 0.07648421 | 1.870856   | 0.05007895 | 1.197618   |            |
| 0.1819084    | 0          | 2.243537   | 0.09194823 | 0.2452296  | 0.06232047 | 0.1174627  |            |
| 0.08168217   | 0.0620905  | 1.212346   | 0.3331985  | 0.0518537  | 0.05893705 | 0          |            |
| 0.1435098    | 0.5858365  | 0.1354248  | 0.05367313 | 0.2228679  | 0.08741053 |            |            |
| 0.06471741   | 0          | 0.2434217  | 0          | 0.7031981  | 0.3533129  | 0.9130673  |            |
| 0.2687944    | 0.2390981  | 3.059368   | 0.4508344  | 0.4229099  | 0.1912105  |            |            |
| 0.2525557    | 0          | 0.0387708  | 0.08258418 | 0.4066343  | 0.09927154 | 0.2416736  |            |
| 0.1314106    | 0          | 0.1209454  | 0          | 0.1540577  | 0.298475   | 0.2512315  | 0.1719918  |
| 1.465832     | 0.1951962  | 1.8696140  | 0.06041841 | 0.05137871 | 0.1144662  |            |            |
| 0.479047     | 0.2450465  | 1.194194   | 0.03148087 | 0.615092   | 0.333279   | 0.4193527  |            |
| 0.07853688   | 0.2465425  | 0.1982924  | 0.1026008  | 0.03212191 | 0.3451141  |            |            |
| 0.08434349   | 0.2503249  | 0          | 0.3171824  | 0          | 0          | 0.09698286 | 0.5587131  |
| 0.5121117    | 0.4290918  | 0.1550832  | 1.863986   | 0.1122392  | 0.1758258  |            |            |
| 0.6141249    | 0.2549474  | 0.2936567  | 0          | 0.1735972  | 0.4145017  | 0.09698286 |            |
| 0            | 0          | 0          | 0.2959101  | 0.4250603  | 0.09194823 | 0.2201945  | 0          |
| 0.1304382    | 0.08276189 | 0.03828561 | 0          | 0          | 0.8280189  | 3.310136   | 0.08662305 |
| 0.05890266   | 2.961469   | 0.09395046 | 0.02119655 | 0.1152502  | 0.2708     | 0.04233088 |            |

|              |             |            |             |             |             |            |            |           |
|--------------|-------------|------------|-------------|-------------|-------------|------------|------------|-----------|
|              | 0.04109042  | 0.9740519  | 0           | 0.04863158  | 0.3723244   | 0.04766721 | 0.7230148  |           |
|              | 3.6880060   | 0.1011537  | 0.03785495  | 0.09986069  | 0           | 0.01459369 | 0          | 0.1805663 |
|              | 0.08303245  | 0.2148771  |             |             |             |            |            |           |
| TCGA-G2-AA3B | 2008        | 0          | 0.2623920   | 0.07014929  | 0.0396496   | 0.1516927  | 0          |           |
|              | 40.931220   | 0.1112465  | 0.4189998   | 0           | 0.1296417   | 0.01742643 | 0.8791867  |           |
|              | 3.18166     | 0.1358875  | 0.08527712  | 0.02588146  | 0.2102622   | 0          | 0.08468021 |           |
|              | 0.1076597   | 0.1797448  | 3.93813145  | 9.45390     | 0.1006688   | 0          | 0.2013376  |           |
|              | 0.1177442   | 0          | 3.0373210   | 0.03622194  | 0.08202641  | 0          | 0.3476007  | 0.3494616 |
|              | 0           | 1.1998240  | 0.1166056   | 0.3147406   | 0.08643846  | 0.04331136 | 0.05949613 |           |
|              | 0.4235790   | 35.1841    | 0.2774585   | 0.08235321  | 0.0135753   | 1.9819170  | 0.3704759  |           |
|              | 3.0876170   | 0.05817258 | 0.1123405   | 0.05799124  | 0           | 2.4256380  | 0.0107186  |           |
|              | 3.6963150   | 0.1104726  | 1.58692     | 0           | 0.007886353 | 0.1720287  | 0.1311035  |           |
|              | 0.3044778   | 0          | 0.004847715 | 0.1464757   | 0.02316472  | 0.3361516  | 0.3123313  |           |
|              | 3.4562950   | 0.1860359  | 0.2381151   | 0.009127461 | 0.1864835   | 0.02401703 |            |           |
|              | 0.02472567  | 0.2591932  | 0.2493779   | 0.1974903   | 0           | 0.06362377 | 0.07606964 |           |
|              | 0.5561612   | 0.0282386  | 0.3577614   | 0           | 0           | 0.06340692 | 0.1025556  |           |
|              | 0.004461935 | 0.4131557  | 0.02818726  | 0           | 0.4779206   | 1.2737590  | 0.04487118 |           |
|              | 0           | 0          | 8.7657111   | 1.4954650   | 0.02839376  | 0.04474168 | 1.0174150  | 0.9154148 |
|              | 0.04318382  | 0          | 0           | 2.94847     | 0           | 3.2907290  | 0.04645091 | 0.2209453 |
|              | 0.2930622   | 0.0296047  | 0.2711894   | 0.05962689  | 0.05176291  | 0.1800711  |            |           |
|              | 0.8975417   | 0.03529423 | 0.5026762   | 0.03523407  | 0.3055961   | 0.09227972 |            |           |
|              | 0.08275619  | 0.1795713  | 0.04306387  | 1.6229030   | 0.1270737   | 0.1245569  |            |           |
|              | 0.2296740   | 0.0811675  | 0.07525724  | 0.2860331   | 1.9739830   | 0.03069899 | 0          | 0         |
|              | 0.3966652   | 5.488480   | 0.03119314  | 0           | 0.2433631   | 1.6107     | 0.5664555  | 0         |
|              | 0.2242748   | 0.05773926 | 1.1106620   | 0.7487009   | 3.5652880   | 0.07429549 | 0.7710191  |           |
|              | 2.2147130   | 0.3099320  | 0.0730584   | 0.2348938   | 0.4072080   | 0.05358177 | 0.05706623 |           |
|              | 1.3412450   | 0.1143289  | 0.2226642   | 0.02201348  | 0.7675749   | 0          | 0.03319699 |           |
|              | 0.2996509   | 0.3781218  | 0.4023173   | 0.5546215   | 0.5064498   | 0.2304233  |            |           |
|              | 2.2891850   | 0.2044351  | 0           | 0.04733738  | 0.2109251   | 0.4689517  | 0.07525724 |           |
|              | 0.7449688   | 0.02900466 | 0.6727137   | 0.4006812   | 0.01207398  | 0.1356738  |            |           |
|              | 0.1703626   | 0.2609931  | 0.2363261   | 0.1726391   | 0.4239577   | 0.03885462 |            |           |
|              | 0.1600030   | 1.0228180  | 0.05116499  | 0.03106812  | 0.1340316   | 0.03200618 | 0          |           |
|              | 1.8873210   | 0.8753966  | 0.2551513   | 0.9986876   | 0.1464985   | 0.1943949  |            |           |
|              | 0.2372791   | 0.05872346 | 0.02705583  | 0           | 0.009139568 | 0.1857882  | 0.04467721 |           |
|              | 0.1374988   | 0          | 0.02941744  | 0.1982797   | 0.8372696   | 0          | 0.05071862 |           |
|              | 0.1121374   | 0.1969885  | 0           | 0.03336027  | 0.3174674   | 0.3662124  | 0          |           |
|              | 0.2724603   | 0.4765264  | 0.01995237  | 0.07235936  | 0           | 0.3462421  | 0.04556832 |           |
|              | 0.08090276  | 0.2381586  | 0.5265167   | 0           | 0.4931851   | 0          | 0.04480634 |           |
|              | 0.5418446   | 0.02195891 | 2.2103882   | 0.0313630   | 0.1182887   | 0.2441416  | 0          |           |
|              | 0.04829593  | 0.08739761 | 0           | 1.1021580   | 0.9027156   | 0.3274208  |            |           |
| TCGA-K4-A54R | 842         | 0          | 0.01898512  | 0.06090701  | 0           | 0.2458530  | 36.054560  |           |
|              | 0.09658959  | 0.03464723 | 0           | 0.03752042  | 0.4841752   | 0.2035607  | 0.7390051  |           |
|              | 0.02051898  | 0.1043315  | 0.2696584   | 0.06233751  | 0.2067657   | 0.1018017  | 0          |           |
|              | 0.07803159  | 1.84477927 | 5.58520     | 0.3321410   | 0.08740552  | 0          | 0          | 0.2747031 |

|              |             |            |            |             |            |            |            |
|--------------|-------------|------------|------------|-------------|------------|------------|------------|
| 0.5031944    | 0.04747954  | 0          | 2.2937090  | 0.09102587  | 0.1214477  | 0.5482872  |            |
| 0.1542745    | 0.2312310   | 0.05297652 | 0.04942375 | 0.08855559  | 0.2942175  | 0          |            |
| 4.0367710    | 0.1806772   | 0.03575153 | 0.01178673 | 0.6118386   | 0.2474347  |            |            |
| 1.7550110    | 0.05050825  | 0.5364672  | 0.1342688  | 0           | 0.5494061  | 0          | 0.07106711 |
| 1.1217040    | 0.1278903   | 0.4239512  | 0.04078924 | 0.04108388  | 0.31898    |            |            |
| 0.1707457    | 0.4846643   | 0.4905859  | 0.02525413 | 0.05087094  | 0.05028184 |            |            |
| 0.3613544    | 0.4437511   | 0.4078924  | 0.3230508  | 0.1033715   | 0          | 0.0647656  |            |
| 0.1668220    | 0.08587209  | 0.4219577  | 0.2886960  | 0.3086473   | 0          | 0.07365499 |            |
| 0.07265208   | 0           | 0          | 0.3451397  | 0           | 0          | 0.07707415 | 0          |
| 0.3553693    | 0.04894709  | 0          | 0.2371165  | 1.3969760   | 3.4673810  | 0.04586184 |            |
| 3.6481590    | 0.6059367   | 0          | 0.07769379 | 0.2099095   | 0.1288081  | 0.4273159  |            |
| 0.1874714    | 0           | 0.2395098  | 2.7914940  | 0.0628993   | 0.3174634  | 0.02688729 | 0          |
| 0.1117050    | 0.6106820   | 0.6554579  | 0          | 0           | 0          | 0.2100905  | 1.5113490  |
| 0.03064417   |             |            |            |             |            |            |            |
| 1.0316040    | 0.06118386  | 1.0971090  | 0.7210955  | 0.3832157   | 0.2806426  | 0          |            |
| 1.3645860    | 0.07355437  | 0.1358117  | 0.04985352 | 0.2818942   | 0.1306840  | 0.3476869  |            |
| 0.4681896    | 0           | 0.1244418  | 0          | 0           | 0          | 0.8331420  | 0.1625004  |
| 0.04293604   |             |            |            |             |            |            |            |
| 0.6272959    | 0           | 0          | 0          | 0.3407709   | 0.05013203 | 0.7232481  | 0.3627138  |
| 0.03478152   | 0           | 0.2869012  | 1.0488660  | 0.2052913   | 0.5920399  | 0.4078924  |            |
| 0.3030495    | 0           | 0.01550743 | 0.06606356 | 0.4944390   | 0.03970634 | 0.04833196 |            |
| 0.07645268   | 0           | 0.3628154  | 0.05764647 | 0.05477294  | 0.2984579  | 0.4880789  |            |
| 0.3210329    | 0           | 0.2293424  | 0.6218570  | 0.2958341   | 0          | 0.04110061 | 0          |
| 0.1437059    | 0.5227359   | 0.3715058  | 0          | 0.3469097   | 0.1495606  | 0.628993   |            |
| 0.2670101    | 0.09861135  | 0.5891779  | 0.4924555  | 0.1713070   | 0.2548389  |            |            |
| 0.2024128    | 0.3454286   | 0          | 0.3805971  | 0.3553914   | 0.0539497  | 0          |            |
| 0.4191555    | 0           | 0.6437606  | 0.9316887  | 0.2126733   | 0.7941746  | 0.01496437 |            |
| 0.08439154   | 0.01584748  | 0.4588790  | 0.07084447 | 0.1150635   | 0.3853524  |            |            |
| 0.1163728    | 0           | 0.1232078  | 0.2554165  | 2.1196710   | 0.8061027  | 0          | 0.02935758 |
| 0.04868155   | 0.1026210   | 0.2068929  | 0          | 0           | 0.06963502 | 0          | 0.8826525  |
| 0.03464723   | 0           | 2.29725    | 0.2555306  | 0.07912925  | 0.1141460  | 0.9255906  | 0          |
| 0            |             |            |            |             |            |            |            |
| 0.3439698    | 0.09666391  | 0.03890303 | 0.6972222  | 0.03813159  | 1.261917   |            |            |
| 2.6455920    | 0.3236732   | 0.5450801  | 0          | 0.08386573  | 0.1400914  | 0          | 0.090278   |
| 0.07306437   | 0.06611223  |            |            |             |            |            |            |
| TCGA-DK-A1AA | 578         | 0          | 0.1600942  | 0.1391015   | 0.03628734 | 0.1851057  |            |
| 0.06142143   | 71.789380   | 0.3345280  | 0.5112919  | 0.2755019   | 0.02966205 |            |            |
| 0.1355638    | 0.1341054   | 0.4636716  | 0.07570004 | 0.01596389  | 0.02368673 |            |            |
| 0.06101507   | 0.4794834   | 0.05961491 | 0.0821085  | 0.04112565  | 1.168984   |            |            |
| 62.263060    | 0.05527928  | 0.05378449 | 0.04606607 | 0.2155192   | 0.06334085 |            |            |
| 0.3329919    | 0.0663007   | 0.07507063 | 0.1074875  | 0.3181244   | 0.09994611 |            |            |
| 0.05333966   | 0.2600716   | 0.1880261  | 0.05170143 | 0.004653444 | 0.1053254  |            |            |
| 0.1322379    | 0.1292199   | 0          | 3.4069290  | 0.09522382  | 0          | 0          | 0.5240015  |
| 0.1825707    | 4.6757060   | 0.3194375  | 0.7196989  | 0.1061473   | 0.2666983  |            |            |
| 0.3192564    | 0.5387981   | 0.01248503 | 0.1313736  | 0           | 0.03370154 | 0.2904701  |            |
| 0.0214975    | 0.002887038 | 0.09606556 | 0.1499826  | 0.4412089   | 0.1292788  |            |            |
| 0.01774653   | 0.1876766   | 0.1113020  | 0.1538231  | 1.6111314   | 0.9444250  | 0.1135068  |            |



|              |            |            |            |            |            |
|--------------|------------|------------|------------|------------|------------|
| 0.007782967  | 0.01670692 | 0.2730717  | 0.0329706  | 0.1131447  | 0.4002983  |
| 0.07607694   | 0.3434123  | 0          | 0.1164570  | 0.1705665  | 0.06362489 |
| 0.3274235    | 0.04960961 | 0.03006006 | 0.1044541  | 0.06257266 | 0.0122507  |
| 0.3145114    | 0.0257970  | 0.08016017 | 0.2994959  | 1.0890520  | 0.01175895 |
| 0.02417095   | 0.9613601  | 0.3193519  | 0.02598599 | 0.1310324  | 0.1106304  |
| 0.1131447    | 0.2702543  | 0.0592828  | 0          | 0.07573852 | 0.9832088  |
| 0.3346309    | 0.02479861 | 0          | 0.1766185  | 0.08046323 | 0.07676701 |
| 0.05457058   | 0.02368673 | 0.1596511  | 1.4769160  | 0.0888286  | 0.6064291  |
| 0.4399488    | 0.04222723 | 0.1009847  | 0.2355595  | 0.03941208 | 0.6957373  |
| 0.5039578    | 0.1590622  | 0.02627472 | 0.1980921  | 0.1721887  | 0.7067997  |
| 0.4670699    | 0          | 0          | 0          | 0.09075703 | 0.2195489  |
| 0.7134196    | 0.25797    | 0.1909970  | 0.07129824 | 0.07697116 | 0.02642151 |
| 1.0327830    | 0.0549936  | 0.09066038 | 0.1764093  | 0.5067268  | 0.4824975  |
| 0.2629949    | 0.1343594  | 1.0115520  | 0.09807615 | 0.06963607 | 0.2125852  |
| 0.02092677   | 0.0764184  | 0.04533019 | 0.1201619  | 0.2294612  | 0          |
| 0.3145976    | 0.3278502  | 0.09668381 | 0.2832520  | 0.1285875  | 0.3941208  |
| 0.1247327    | 0          | 0.1083080  | 0.09651938 | 0.2777079  | 0.3443774  |
| 0.05309018   | 0.3526099  | 0.8396487  | 0.1768019  | 0.2069479  | 0.103944   |
| 0.01194306   | 0.3028001  | 0.1760565  | 0.2051957  | 0.1066793  | 0.09498477 |
| 0.04995898   | 0.09360834 | 0.04682624 | 0.02843357 | 0.1226658  | 0.2758337  |
| 0.3067751    | 0.7711060  | 0.3876598  | 0.1401088  | 0.5039811  | 0.05520759 |
| 0.05930345   | 0.3716742  | 0.1881031  | 0.2723767  | 0          | 0.05855177 |
| 0.1431102    | 0          | 0.1623381  | 0.08076859 | 0.5160431  | 0.2780818  |
| 0.2166160    | 0.0513141  | 0.2704260  | 0.1649808  | 0.08287078 | 0.0484244  |
| 0            | 0.01246779 | 1.1629790  | 0.2921668  | 0.09105709 | 0.1135068  |
| 0.04766189   | 0.5761414  | 0.3217548  | 0.1606228  | 0.06929597 | 0.2441802  |
| 0.2547280    | 0.06151019 | 0.5494106  | 0.04019362 | 1.9675254  | 0.7238160  |
| 0.0319198    | 0.08420386 | 0.3978042  | 0.01845839 | 0.01901924 | 0.2283839  |
| 0.04900984   | 0.1184685  |            |            |            |            |
| TCGA-CU-A5W6 | 56         | 1          | 0.07549096 | 0.03229146 | 0          |
| 28.472470    | 0.2304428  | 0.5786280  | 0.01491933 | 0.4361865  | 0.3237692  |
| 0.5317327    | 0.05711305 | 0.1070596  | 0          | 0.6940474  | 0.2630935  |
| 0.1486753    | 0.06205576 | 1.9788623  | 0.4575530  | 0.13207    | 0.3570911  |
| 0.09557695   | 1.3981540  | 0.1510352  | 0.03243824 | 0.1280074  | 0.1146169  |
| 0.06438868   | 0.7412567  | 0.1380252  | 0.1281657  | 0.06319552 | 0.04272277 |
| 0.04695008   | 0.3899679  | 0.1746267  | 3.1018450  | 0.09579077 | 0.05686384 |
| 0.02812071   | 0.3649302  | 0.3148417  | 5.63401    | 0.08033485 | 0.6205576  |
| 0.2002111    | 7.4851840  | 0.7170022  | 0.4258618  | 0.04171504 | 2.2796870  |
| 0            | 0.4045840  | 0.04574158 | 0.1248235  | 0          | 0.2452777  |
| 0.02677828   | 0.3074645  | 0.1199621  | 0.09947503 | 0.2744774  | 1.621912   |
| 0.08563695   | 0          | 0.03781437 | 0.1201802  | 0.0331669  | 0.1365821  |
| 0.5454583    | 0.06928555 | 0.1464380  | 0.01575753 | 0.2880166  | 0          |
| 0.3628684    | 0.01751267 | 0.0472089  | 0.01848545 | 0.1493048  | 0.03892588 |
| 0.2796043    | 1.5507230  | 0.01064606 | 0.1549149  | 0          | 0.03647229 |
|              |            |            |            |            | 0.7003021  |

|                           |                   |                   |                                   |                    |                    |                    |
|---------------------------|-------------------|-------------------|-----------------------------------|--------------------|--------------------|--------------------|
| 0.6883999                 | 0.1960553         | 0.1482891         | 0.08346681                        | 0                  | 0.7204378          | 0.08945363         |
| 0                         | 0.03809473        | 4.0067870         | 0.8583892                         | 0.04276502         | 0.05085329         | 0.1332525          |
| 0.1214134                 | 0.9573513         | 0.4369232         | 0                                 | 0                  | 0.1243368          | 2.1784840.04874044 |
| 0.1893227                 | 0.1459721         | 1.10484           | 0.03185898                        | 0.3047578          | 0.1818545          | 0                  |
| 1.3093250.1754855         | 0.2240129         | 0                 | 0.5230878                         | 0.05196417         | 0.6715074          |                    |
| 1.7419940                 | 0                 | 0.1499771         | 0.04604137                        | 0.2282435          | 1.0766730.08615387 |                    |
| 0.1024365                 | 0.3465807         | 0.4448673         | 0.4528877                         | 0                  | 0.1935736          | 0.1993411          |
| 0.3834490.7454835         | 0                 | 0.1026002         | 0.2661894                         | 0.7646156          | 0.3618214          |                    |
| 0.1008918                 | 0.08109559        | 0.4820091         | 0                                 | 0.02466502         | 0.07880701         | 0.9416339          |
| 0.2210393                 | 0.2306201         | 0.09120016        | 0.4463163                         | 0.1154137          | 0                  | 0.1851256          |
| 0.4272353                 | 0.2892112         | 0.1458892         | 0.1165657                         | 0.1901491          | 0.6635611          |                    |
| 0.7999055                 | 0.1537468         | 0.09805757        | 0.1456411                         | 0.07618945         | 0.1039283          |                    |
| 1.00768                   | 0                 | 0.2561789         | 0.3154501                         | 0.06669544         | 0.08743562         | 0.8626432          |
| 0.4685523                 | 0.2284522         | 0.1021758         | 0.2026643                         | 0.1073145          | 0.1592505          | 0                  |
| 0.5649940.2826302         | 0.2145214         | 0                 | 0.4088474                         | 0.0385752          | 0.4188764          |                    |
| 0.7799358                 | 0.1832259         | 0.6186896         | 0.2142114                         | 0.1789696          | 0.6900107          |                    |
| 0.08109559                | 0.2241805         | 0                 | 0.02524302                        | 0.4133608          | 0.2159433          | 0                  |
| 0.9583671                 | 0.9254646         | 0                 | 0.04669408                        | 0                  | 0.05440721         | 0                  |
| 0.09742542                | 0                 | 0.02215131        | 0.009406519                       | 0.6580708          | 0                  | 0.08743562         |
| 0.2854565                 | 0.3347061         | 0.01348472        | 0.2199579                         | 0.09396885         | 0                  | 0.0261407          |
| 0.3740336                 | 0.03843669        | 0.06187641        | 0.7375070.0303247                 | 0.5435939          |                    |                    |
| 2.8817670.08910202        | 0.07224714        | 0                 | 0.1333909                         | 0.009284144        | 0                  | 0.6030771          |
| 0.06338782                | 0.1472148         |                   |                                   |                    |                    |                    |
| TCGA-DK-AA6R              | 5041              | 0                 | 0.03153198                        | 0.1011592          | 0                  | 0.05833314         |
| 24.947620.05492918        | 0.1260471         | 0.4028140.1085251 | 0.01557922                        | 0.5999761          |                    |                    |
| 0.0422612                 | 0.2922376         | 0.04259942        | 0.07546153                        | 0.0373225          | 1.220235           |                    |
| 0.1373651                 | 0.05636011        | 0.1552512         | 0.1296011.34671522.405430.3266325 |                    |                    |                    |
| 0.1694934                 | 0.2177550.2263917 | 0.4990218         | 0.5703106                         | 0.05223406         | 0                  |                    |
| 0.0338731.2030230.1196865 | 0.03361831        | 0.04553193        | 0.1121012                         | 0.06982668         |                    |                    |
| 0.1759752                 | 0.1070698         | 0.03677003        | 0                                 | 0.1458804          | 1.5628940          | 0.1187579          |
| 0.04894084                | 0.6986305         | 0.2465755         | 1.81176                           | 0.08388809         | 0.5265042          |                    |
| 0.2090665                 | 0                 | 0.1871789         | 0.1212812                         | 0.05480144         | 0.05175041         | 0                  |
| 0.1760329                 | 0                 | 0.02956865        | 0.02943262                        | 0.1417939          | 0.1829474          | 0.2037009          |
| 0.03495337                | 0.1182867         | 0.05010723        | 0.1154165                         | 0.5322899          | 0.5322899          |                    |
| 0.2086577                 | 0.0122634         | 0                 | 0.01792797                        | 0.1039017          | 0.07131157         | 0.04672137         |
| 0.2397445                 | 0.1708752         | 0.3617504         | 0.3975791                         | 0.03290899         | 0.2005038          |                    |
| 0.08144327                | 0.8025294         | 0.07816845        | 0                                 | 0.07314905         | 0.2957818          | 0.006434358        |
| 0.1113633                 | 0.08129519        | 0.06315304        | 0.2172810.7975717                 | 0.09634686         | 0                  |                    |
| 0.09720077                | 0.1142564         | 0.1044681         | 0.1078272                         | 0.08189076         | 0.09032799         |                    |
| 0.20337                   | 0.03565578        | 0.4400263         | 0.1245469                         | 0.04638211         | 0.07955935         |                    |
| 1.5039820                 | 0.1581805         | 0.0167462         | 0                                 | 0                  | 0.1267836          | 0.2810531          |
| 0.4562485                 | 0                 | 0.0373225         | 0.1136067                         | 1.0981980.06362031 | 0.8731595          |                    |
| 0.1016191.0843860.2994131 | 0.1591187         | 0.08631729        | 0                                 | 0.4064759          |                    |                    |
| 0.06108245                | 0.04594879        | 0.04140033        | 0.03901602                        | 0.05426257         | 0.5774658          |                    |

|              |             |             |            |            |             |            |            |
|--------------|-------------|-------------|------------|------------|-------------|------------|------------|
| 0.2221732    | 0.04426966  | 0           | 0          | 0          | 0.09533551  | 0.3891791  | 0.04498225 |
| 0.2495905    | 0.5593157   | 0           | 0.1289779  | 0.0561713  | 0.08085417  | 0.08326323 |            |
| 0.4004091    | 0.3872724   | 0           | 0.1428510  | 0.07941804 | 0.3629250   | 0.3317487  |            |
| 0.2317794    | 0.04234124  | 0.08388809  | 0.05561238 | 0.1931697  | 0.05486178  |            |            |
| 0.2377167    | 0.4616320   | 0.1605471   | 0.1031701  | 0          | 0.1807777   | 0.0957438  |            |
| 0.06822841   | 0.2974214   | 0.2145812   | 0.6093677  | 0.08114765 | 0.03647011  |            |            |
| 0.6013942    | 0.2948067   | 0           | 0.06826314 | 0.2281243  | 0.3182374   | 0.2713128  |            |
| 0.4352238    | 0.04182634  | 0.4409502   | 0.2592021  | 0.2959930  | 0.09130294  |            |            |
| 0.1637815    | 0.11291     | 0.2385568   | 0.07824306 | 0.1645998  | 0.05603052  |            |            |
| 0.0644390    | 0.08428342  | 0           | 0          | 0.1932811  | 0.1750032   | 0.6042210  | 0.1944015  |
| 0.5701029    | 0.1471769   | 0.8075681   | 0.06213501 | 0          | 0.2204362   | 0.169365   |            |
| 0.2731121    | 0           | 3.4563930   | 0.2753590  | 0.06442702 | 0.09914047  | 0.0511583  |            |
| 0.08484318   | 0.5450547   | 0.9517928   | 0.06108245 | 0.1462781  | 0           | 0.02840683 |            |
| 0.2599555    | 0.04810736  | 0.1017346   | 0.08801644 | 0          | 0.2848546   | 0.6413657  |            |
| 0.02877243   | 0.03912983  | 9.6578680   | 0.07489507 | 0.09856807 | 0.3901029   |            |            |
| 0.2126045    | 0.1124839   | 0.02729692  | 0.1340788  | 0.2408206  | 0.03230661  |            |            |
| 0.7701273    | 0.09499792  | 0.3056509   | 1.8907550  | 0.01550717 | 0.2766231   | 0          |            |
| 0.06964541   | 0.02908436  | 0           | 0.05997633 | 0.02757979 | 0.1317653   |            |            |
| TCGA-BT-A3PH | 142         | 1           | 0.01052781 | 0.1013242  | 0.03818013  | 0.2434513  | 0          |
| 39.261180    | 0.1071236   | 0.2497679   | 0.1449362  | 0.02080618 | 0.241221    |            |            |
| 0.1975407    | 0.3512572   | 0.03413514  | 0.03359317 | 0.02492226 | 0.004938284 |            |            |
| 0.2751785    | 0           | 0.05183484  | 0.08654164 | 2.22439656 | 4.73960     | 0.1114786  |            |
| 0.01131799   | 0           | 0.1133805   | 0          | 0.4569928  | 0.06975903  | 0.07898642 |            |
| 0.06785651   | 0.7586946   | 0.06730203  | 0.08979508 | 0.3952538  | 0.3315053   |            |            |
| 0.08548296   | 0.01958469  | 0.2430875   | 0          | 0.2175364  | 0.02435307  | 2.465385   |            |
| 0.1001908    | 0.09912638  | 0           | 0.3816929  | 0.1372099  | 3.3749690   | 0.02800832 |            |
| 1.46039      | 0.1116840   | 0.2421671   | 0          | 0.01032136 | 0.5874615   | 0.1119632  |            |
| 0.03545946   | 0.1645654   | 0           | 0.01366933 | 0.07580735 | 0.1262447   | 0.4397902  |            |
| 0.3060499    | 0.004668053 | 0.1974660   | 0.02788277 | 0.2157956  | 1.0116344   | 0.071391   |            |
| 0.01990458   | 0.0655115   | 0.004394593 | 0.02394296 | 0.1040712  | 0.1428558   |            |            |
| 0.3275832    | 0.04002261  | 0.4564107   | 0.04831208 | 0.1021097  | 0.1904511   |            |            |
| 0.06694364   | 0.05438409  | 0.3445023   | 0          | 0.03162804 | 0.03663419  | 0.03291826 |            |
| 0.04081742   | 0.08179963  | 0.0271426   | 0          | 0.2561751  | 1.1781360   | 0.00989785 | 0          |
| 0.2596249    | 0.07629523  | 0.2441566   | 0.7680223  | 0          | 0.0258501   | 0.2425022  |            |
| 0.0476186    | 0.4739185   | 0.04158338  | 0.03097185 | 0.05312609 | 1.72164     | 0          |            |
| 0.3520857    | 0.007454898 | 0.03545946  | 0.3097185  | 0.1128804  | 0.09740066  |            |            |
| 0.3046619    | 0           | 0           | 0.04876802 | 3.42219    | 0.05097928  | 0.01100106 | 0.03392826 |
| 0.6678944    | 0.02221493  | 0.05312609  | 0.2997214  | 0          | 0.7731530   | 0.5302449  |            |
| 0.07252228   | 0           | 0.1302656   | 0          | 0.02754323 | 0.4450713   | 0.05912251 |            |
| 0.02300221   | 0           | 0           | 0.09549104 | 0.7507529  | 0.09011126  | 0.07142791 |            |
| 0.3002530    | 0.02870852  | 0.03750862  | 0.08098607 | 0          | 0.5347498   | 1.094491   |            |
| 0.01928738   | 0.1669314   | 0.2651587   | 0.5331583  | 0.7845734  | 0.05159056  |            |            |
| 0.08482064   | 0.9522828   | 0.0371354   | 0.04299664 | 0.03663419 | 0.1731669   |            |            |
| 0.02201834   | 0.05360299  | 0.04239526  | 0.02917609 | 0.04023836 | 0           | 0.02277991 |            |

|                    |                    |                    |                    |                    |                   |
|--------------------|--------------------|--------------------|--------------------|--------------------|-------------------|
| 0.1324029          | 0.4988527          | 0.07629523         | 0.1354667          | 0.05952973         | 0.4670591         |
| 0.09842923         | 0                  | 0.0227915          | 0.05077698         | 0.1859413          | 0.07246812        |
| 0                  | 0.3062243          | 0.1514479          | 0.3255421          | 0.1132262          | 0.3280974         |
| 0.6371892          | 0.0237487          | 0.1884209          | 0.03741462         | 0.06940229         | 0                 |
| 0.1970750          | 0                  | 0.2106033          | 0.3496750          | 0.06490623         | 0.2447284         |
| 0.5122942          | 0.0497891          | 0.04679759         | 0.5096978          | 0.05654709         | 0.07815933        |
| 0                  | 0.04620443         | 0.2832625          | 0.08604284         | 0                  | 0.06832235        |
| 0.1133088          | 0.6503594          | 1.2223630          | 0.04078807         | 0                  | 0                 |
| 0.01896878         | 0                  | 0.09637168         | 0.1698343          | 0                  | 0.01544587        |
| 0.2033310          | 0.3670926          | 0.1152775          | 0                  | 0                  | 0.1000230         |
| 0.07835625         | 0.2312787          | 0.1419675          | 0.0187779          | 0                  | 0.3425559         |
| 0.08040448         | 0.08629152         | 1.0097430          | 0.08458035         | 0.2624139          | 1.6626660         |
| 0.04487159         | 0.1679239          | 0.1328941          | 0.2325301          | 0.01294747         | 0                 |
| 0.1201484          | 0.003683304        | 0.1613092          | TCGA-BL-A13I       | 223                | 1                 |
| 0.737283923333333  | 1.3333784          | 1.50084733333333   | 2.0735654          | 0.0437340833333333 | 20.8166933333333  |
| 0                  | 0.946930066666667  | 3.2607808          | 2.61545613333333   | 1.66086545         | 1.53764356666667  |
| 3.34213993333333   | 0.7323771          | 0.71933466         | 0.07118295         | 1.52909299333333   | 3.17108106666667  |
| 0.304243766666667  | 1.19303093333333   | 3.72857056666667   | 2.98196766666667   | 3.92793766666667   | 20.6465633333333  |
| 0.207203283333333  | 1.88623186666667   | 7.56412783333333   | 0.530857063333333  | 0.100760866666667  | 0.383387433333333 |
| 2.81545066666667   | 2.14229147666667   | 4.59958            | 2.94435056666667   | 1.32781263333333   | 0.936816533333333 |
| 1.35165603333333   | 1.02603183333333   | 0.1089786          | 2.43328923333333   | 1.09404902666667   | 3.91237391        |
| 0.0444344733333333 | 8.35742033333333   | 0.142340643333333  | 0.833890883333333  | 2.25047377666667   | 1.47668866666667  |
| 0.4158158          | 3.56736963333333   | 2.146296           | 1.83647233333333   | 8.2406059          | 4.04886783333333  |
| 10.2520058         | 1.0637779          | 12.5186831333333   | 3.1507242          | 0.3194176          | 7.5190242         |
| 1.13017383666667   | 0.0170988133333333 | 0.0566307756666667 | 0.230547233333333  | 1.98799416666667   | 2.23432166666667  |
| 2.09453333333333   | 7.93943611         | 2.52033755         | 1.50539396666667   | 0.898931733333333  | 7.17851796666667  |
| 1.05985753333333   | 1.4731587          | 0.0061904633333333 | 0.0166105633333333 | 0.874641033333333  | 0.474911166666667 |
| 1.81075866666667   | 0.519635533333333  | 0.75348            | 3.6996319          | 7.00123173333333   | 1.20416833333333  |
| 1.16933373333333   | 5.7773028          | 0.747273366666667  | 1.5551161          | 4.4460744          | 9.8443551         |
| 7.131158           | 7.1208220          | 7.6551848          | 3.09838233333333   | 0.29057661         | 0                 |
| 0.946360633333333  | 5.4457514          | 2.98651033666667   | 3.90980833333333   | 10.9643719166667   | 0.595402033333333 |
| 0.888902533333333  | 1.1668221          | 4.26153666666667   | 3.30896166666667   | 0.6665374          | 0.748402663333333 |
| 2.4757689          | 1.72826993333333   | 1.60640356666667   | 0.823298666666667  | 1.06746293333333   | 0.85906928        |
| 0.647390033333333  | 6.72403631666667   | 2.99661925333333   | 0.394941166666667  | 3.01537496666667   | 4.982767          |
| 1.67895956666667   | 3.03832766666667   | 1.8036841          | 1.16329473333333   |                    |                   |

|                          |                            |                                  |                                       |
|--------------------------|----------------------------|----------------------------------|---------------------------------------|
| 1.88440933333333         | 1.62390257                 | 4.56438633333333                 | 0.205185766666667                     |
| 8.82968966666667         | 2.28491613333333           | 1.57841156666667                 |                                       |
| 0.094736796666667        | 6.10550106666667           | 0.6713958                        | 2.20914413333333                      |
| 0.366945746666667        | 1.7154284                  | 2.56730093333333                 | 1.46764835666667                      |
| 0.298231033333333        | 0.5542824                  | 3.4371458                        | 1.6008850.7107872                     |
| 0.205922633333333        | 1.99788922                 | 1.4439258                        | 2.56585433333333                      |
| 0.670045966666667        | 1.48506446666667           | 2.22684626666667                 |                                       |
| 2.19102096666667         | 2.7358119                  | 2.56605936666667                 | 18.3778066666667                      |
| 4.1535813.64613123333333 | 0.02304893                 | 0.45360139                       | 1.80210853333333                      |
| 6.94584913333333         | 0.384285963333333          | 1.9050769                        | 2.2013373 1.7232503                   |
| 2.21774166666667         | 2.00057806                 | 0.108118983333333                | 0.403686266666667                     |
| 2.91643623               | 1.80320333333333           | 0.6640998                        | 1.79311996666667                      |
| 4.33344733333333         | 8.2023160.8519528          | 6.25730856666667                 |                                       |
| 0.158691033333333        | 1.67570339333333           | 2.86738733333333                 |                                       |
| 0.660302446666667        | 0.820130233333333          | 4.63629766666667                 | 0.68037145                            |
| 5.99137132               | 7.0159021.43340336666667   | 2.5260548                        | 5.0549785                             |
| 8.80190415333333         | 1.3753145                  | 0.836342233333333                | 0.02636733                            |
| 1.10226973333333         | 5.43455033333333           | 0.136685966666667                |                                       |
| 0.779699733333333        | 1.00185853666667           | 1.0941171                        | 0.291980866666667                     |
| 0.477788213333333        | 6.2032010.4555786          | 1.37449063333333                 |                                       |
| 3.11865749666667         | 5.04717396666667           | 1.45137223333333                 |                                       |
| 1.23621296666667         | 0.682220166666667          | 4.1966074                        | 1.1716142 12.153848                   |
| 0.779885996666667        | 1.23974003333333           | 26.6008                          | 19.8620072                            |
| 1.17155346666667         | 2.95734509333333           | 0.09115971                       | 2.51603926666667                      |
| 0.929512163333333        | 8.23454413333333           | 5.28145143333333                 |                                       |
| 5.72794273333333         | 2.3557897                  | 2.33359366666667                 | 0 1.86066413333333                    |
| 0.8584463                | 1.04489673333333           | 2.09957533333333                 | 0.380715536666667                     |
| 0.407915266666667        | 0.0258057266666667         | 18.5083366666667                 |                                       |
| 1.86608963333333         | 8.12186536666667           | 0.745336816666667                |                                       |
| 1.12537418666667         | 7.65934686666667           | 0.4797095                        | 2.61025603333333                      |
| 6.27223474666667         | 1.19229126666667           | 0.042585733333333                |                                       |
| 2.87045867666667         | 0.846998666666667          | 9.8286972.39729333333333         |                                       |
| 7.77820566666667         | 3.16400936666667           | 0.3832785                        | 13.0249423333333                      |
| 0.285771533333333        | 2.1543753                  | 2.6454960.8789110.15882853333333 |                                       |
| 3.3368664                | 0.367971933333333          | 2.6663180.68624845333333         |                                       |
| TCGA-CF-A3MF             | 383 0 0                    | 0.2445137 0                      | 0.3806948 0 13.741860                 |
| 0.04431575               | 1.1683790                  | 0.03012544                       | 0.07289029 0.2860209 1.66704          |
| 0.1153240.01621328       | 0.1443406                  | 0.007150184 0                    | 0.1180652 0.200139                    |
| 0.06265219               | 2.18733534.038720.02807144 | 0 0                              | 0.1641646 0 2.5143990                 |
| 0                        | 0.03275001                 | 0.03230943                       | 0.0609045 0.1300151 1.4967620.1780606 |
| 0.1575274                | 0.007089212                | 0.04658407 0                     | 0.3149728 0 22.3815 0.1450672         |
| 0.2296415                | 0.03785465                 | 1.7193760.1192004                | 3.3159390.1622139 0.5482067           |
| 0.06737845               | 0 3.8230620                | 0.02445444                       | 1.7011810.1621126 0 0.7148270         |
| 0.006597316              | 0.1260232                  | 0.3198838                        | 0.1061293 0.04923692 0.05407131       |

|              |             |            |            |             |            |             |
|--------------|-------------|------------|------------|-------------|------------|-------------|
| 0.2450681    | 0.0403717   | 0.04463605 | 0.2771155  | 12.959650   | 0.02882001 | 0           |
| 0.006362969  | 0.08666803  | 0.03348568 | 0.03447369 | 0.2032759   | 0          | 0.1376752   |
| 0            | 0.1182764   | 0.1113629  | 0          | 0.1574864   | 0          | 0           |
| 0.01244208   | 0.2907124   | 0          | 0          | 0.07877907  | 0.2804109  | 0.003582796 |
| 0.03128076   | 0           | 0.03682284 | 3.1311460  | 0.7297671   | 0.03958792 | 0.04366668  |
| 0.5758384    | 0.1378948   | 0.1784096  | 0          | 0           | 0          | 4.2202290   |
| 0.7646818    | 0.01619102  | 0.7701309  | 0.1793776  | 0.4494614   | 0.01719845 |             |
| 0.4411226    | 0.08313464  | 0          | 0.1608376  | 0.2528071   | 0.07381334 | 0.07964262  |
| 0.04912502   | 0.4978872   | 0.1286608  | 0          | 0.3087858   | 0          | 0.8931821   |
| 1.2402050    | 0.05250282  | 0.08005558 | 0.07544505 | 0.7344905   | 0.1595203  |             |
| 2.0540970    | 0           | 0          | 0          | 0.1843497   | 1.0452130  | 0.1304729   |
| 0.05614287   | 0           | 0          | 0.2345209  | 0.08050282  | 0.1290448  | 0.4992442   |
| 0.02792637   | 0.03452876  | 0          | 0.4912502  | 1.0513480   | 0.1154430  | 0.08187503  |
| 1.8249070    | 0.05376867  | 0.03735312 | 0.3182578  | 0.8357663   | 0.3188054  |             |
| 0.07761223   | 0.007673059 | 0.04224431 | 0.01942049 | 0           | 0.05497204 | 0.3834148   |
| 0.1536794    | 0.1472914   | 0.03922869 | 0.01958946 | 2.4332680   | 0.04750551 | 0           |
| 0.07352043   | 0.4615304   | 0.5770997  | 0.2077342  | 0.04043968  | 0.1108462  |             |
| 0.2192827    | 0.08417059  | 0.2396063  | 0.03958792 | 0.0363889   | 0.09884912 |             |
| 0.00687719   | 0.1364081   | 0          | 0.07034172 | 0           | 0.3870736  | 0           |
| 0.1245768    | 0           | 2.6313920  | 0.1574864  | 0.09960833  | 0.2082120  | 0.0961201   |
| 0.4065519    | 0.2417572   | 0.04093751 | 0.03772252 | 0           | 0.02867134 | 0.2086668   |
| 0.03114554   | 0.91061     | 0          | 0          | 0.2246164   | 0.5436701  | 0.0590574   |
| 0.02746507   | 0.0837791   | 0.03986783 | 0          | 0           | 0          | 0.009496927 |
| 0.1261086    | 0.05764002  | 0.1568928  | 0.04991918 | 0.1480480   | 0.15812    | 0.08156606  |
| 0            | 0.3945373   | 0          | 0.06247112 | 0.3097952   | 0          | 0.6332522   |
| 0.004997689  | 0.02431384  | 0.3206974  | 0          | 0.05624026  | 0.02897454 | 0.4639036   |
| 0.03733162   | 0.01061641  |            |            |             |            |             |
| TCGA-CF-A47T | 385         | 1          | 0.0466363  | 0.0166240   | 0.2818852  | 0.1150342   |
| 91.1613      | 0           | 0.05649263 | 0.7659877  | 0.1070069   | 0.1075289  | 0.1765456   |
| 0.4583698    | 1.1814120   | 0.09240764 | 0.06889431 | 0.07360074  | 0.2041733  |             |
| 0.1354435    | 0.1018814   | 0.05102644 | 0.06389398 | 1.029279123 | 1.9060     | 0.04294173  |
| 0            | 0           | 0.1116123  | 0          | 0.7872651   | 0.05150332 | 0.03887729  |
| 0.4942471    | 0.09316747  | 0.06629601 | 0.3142647  | 0.0947425   | 0.1262247  |             |
| 0.02168917   | 0.04574784  | 0.01208521 | 0.1204559  | 0           | 13.712930  | 0.09862829  |
| 0.1463707    | 0.01930247  | 0.8767270  | 0.12156310 | 0.079060    | 0.04135727 | 0.3594036   |
| 0.1236850    | 1.0612223   | 0.7868450  | 0.04295073 | 3.8269830   | 0.05235967 | 0.694281    |
| 0.1001974    | 0.006728077 | 0.1368127  | 0.09320686 | 0.1803881   | 0.1004256  |             |
| 0.006892878  | 0.2082712   | 0.0658750  | 0.1479424  | 0.1211177   | 4.0556080  | 0.1175649   |
| 0.04836736   | 0.03893451  | 0.2298031  | 0          | 0.03515697  | 0.3915760  | 0.1404040   |
| 0            | 0.05408102  | 0.1976989  | 0.04015195 | 0.0565216   | 0          | 0           |
| 0.04860733   | 0.01268869  | 0.3952992  | 0.04007895 | 0.1245391   | 0.1472909  |             |
| 0.8817369    | 0           | 0          | 0          | 0.03755268  | 1.3390861  | 0.4884630   |
| 0.5442820    | 0.03515697  | 0.5458371  | 0.03070115 | 0           | 0          | 3.38958     |
| 0.03302385   | 0           | 0.8689316  | 0.1666799  | 0.1262831   | 0.2570662  | 0           |

|              |            |            |            |             |            |            |             |
|--------------|------------|------------|------------|-------------|------------|------------|-------------|
| 0.03680037   | 0.1280199  | 1.5082340  | 0.05018423 | 0.2274192   | 0          | 0.2245842  | 0           |
| 0.1176695    | 0.2212853  | 0.06123173 | 1.9432220  | 0.4215955   | 0.1276805  | 0          |             |
| 0.1538808    | 0.2140138  | 0.3253642  | 2.1495760  | 0           | 0          | 0.04740521 |             |
| 0.0940018    | 1.5775760  | 0.04435296 | 0          | 0.1081355   | 0          | 0          | 0.1195846   |
| 0.0410492    | 0.1974038  | 0.4859967  | 0.02847987 | 0.1760657   | 0.391535   |            |             |
| 0.7156955    | 0.3452803  | 0.1523579  | 0.1669956  | 0.2067863   | 0          | 0.01269782 |             |
| 0            | 1.8857830  | 0.1300497  | 0.07915053 | 0.007825141 | 0          | 0.01980541 | 0           |
| 0.02242464   | 0.2443838  | 0.3447958  | 0.1126580  | 0.04000621  | 0.1158708  |            |             |
| 0.7476716    | 0.04844708 | 0          | 0.06730816 | 0           | 0.2353390  | 0.1605104  | 0.6572829   |
| 0            | 0.3217383  | 0.2662249  | 0.1888455  | 0.1414689   | 0.08074514 | 0.1855507  |             |
| 0.1680139    | 0.04208098 | 0.2376493  | 0.05524667 | 0.1250255   | 0          | 0.3116412  |             |
| 0.07275057   | 0          | 0.1905771  | 0.1687625  | 0.03971788  | 0.8146482  | 0.2810637  |             |
| 0.1306062    | 0.4379488  | 0.1592910  | 0.09213552 | 0.5547351   | 0          | 0.0384702  | 0           |
| 0.09421654   | 0.2641688  | 0.03176286 | 0.09775354 | 0.05044261  | 0.04182813 |            |             |
| 0.2378787    | 0.5352443  | 0.06022793 | 0.09615452 | 0           | 0.1680566  | 0          |             |
| 0.09486871   | 0.02507784 | 0          | 0          | 0.09685159  | 0.4065385  | 0.02836991 |             |
| 0.01286081   | 0          | 0.07384731 | 0.04165249 | 0.1150342   | 0.4998874  | 0.3604585  |             |
| 0            | 0.2873979  | 0.03957527 | 0.06370931 | 0.5043881   | 0.06244596 | 1.291607   |             |
| 2.5601350    | 0.1223219  | 0.0991830  | 0          | 0.00955916  | 0          | 1.1236080  | 0.005438792 |
| 0.05413414   |            |            |            |             |            |            |             |
| TCGA-YC-A8S6 | 293        | 0          | 0.04396544 | 0.1175396   | 0.0797225  | 0.1830029  |             |
| 0.1349416    | 44.582330  | 0.1118403  | 0.3209421  | 0           | 0.0434446  | 2.146134   |             |
| 0.2946266    | 1.2631590  | 0.1306732  | 0.01169077 | 0.05203923  | 0.01031145 |            |             |
| 2.0589470    | 0.01309727 | 0.2164687  | 0          | 1.43066     | 42.7095    | 0.0607237  | 0.1417961   |
| 0            | 0.2367456  | 0          | 0.5725377  | 0.1456612   | 0.05497619 | 0.1889182  |             |
| 0.2795650    | 0.1053981  | 0.04687444 | 0.3174287  | 0.1339749   | 0.3326474  |            |             |
| 0.06134109   | 0.07713254 | 0.08544819 | 0.05677869 | 0.2034029   | 14.938320  |            |             |
| 0.04139641   | 0.2593076  | 0.7969986  | 0.2865028  | 4.4743780   | 0.1169662  |            |             |
| 0.9035217    | 1.2437510  | 1.2233710  | 0.05636799 | 0.07053262  | 1.5152810  | 0.07792875 |             |
| 0            | 0.2945339  | 0.09445909 | 0.1046556  | 0.1582905   | 0.06590169 | 0.1530516  |             |
| 3.9053130    | 0.08246428 | 0.2911048  | 0.08046334 | 0.5138159   | 3.0361850  | 0.20781    |             |
| 0.2564852    | 0.1101142  | 0.1249860  | 0.1931619  | 0.04971531  | 0.2605768  |            |             |
| 0.4178485    | 0.5559248  | 0          | 0.04264227 | 0.1988368   | 0          | 0.05677869 | 0           |
| 0.5449563    | 0.06604131 | 0.0637454  | 0          | 0.4710041   | 0.5667545  | 0.2267018  |             |
| 0            | 0.5822467  | 0.8761719  | 0.0155005  | 0.5864392   | 0.3388206  | 0.3186184  |             |
| 0.7283061    | 0.5011495  | 0.05709066 | 0.09895714 | 0.4050877   | 0          | 0.4552028  |             |
| 0.04341434   | 0.06467116 | 0          | 1.2929     | 0           | 0.3675884  | 0.03113258 | 0           |
| 0.1293423    | 0.1767760  | 0.5010060  | 0.1817580  | 0.1198904   | 0.05203923 | 0.1640605  |             |
| 1.0755080    | 0.05322396 | 0.8269521  | 0          | 2.4302030   | 0.04638616 | 0.3882571  |             |
| 0.2647772    | 0          | 0.8243702  | 0.3406721  | 0.1630796   | 0.2309     | 0          | 0.07565898  |
| 0            | 0.8712531  | 0          | 0          | 0.4367285   | 0.3351774  | 0.1993913  | 0.9646886   |
| 0.06271931   | 0.04971531 | 0.2370166  | 0          | 0.1798356   | 0          | 0.3945759  | 0           |
| 2.6984281    | 0.22177    | 0.04027326 | 0.04979473 | 0.05536678  | 0.5060308  | 0.263403   |             |
| 0.2056555    | 0.1771108  | 0.9942129  | 0.07754104 | 0.0538678   | 0.3442251  |            |             |

|              |            |            |            |             |             |
|--------------|------------|------------|------------|-------------|-------------|
| 0.6327709    | 0.04597566 | 0.05596319 | 0.06639297 | 0.1015358   | 0.6721617   |
| 0.06674839   | 0.1585529  | 0.3455820  | 0.2770307  | 0.05310307  | 0.1131452   |
| 0.1130016    | 0.8658751  | 0.0276320  | 0.05596319 | 0.04759008  | 0.2120510   |
| 0.6052718    | 0.3763932  | 0.02915949 | 0.2828183  | 0.4818783   | 0.9953516   |
| 0.1273048    | 0.1141813  | 0.8396363  | 0.09503506 | 0.05950652  | 0.3770415   |
| 0.07812406   | 0.04637322 | 0          | 0.4113110  | 0           | 0           |
| 0.4065848    | 1.0787950  | 0.1231264  | 0.8069684  | 0.05198138  | 0.3257216   |
| 0.3542216    | 0          | 1.0663930  | 0.2894332  | 0.2594166   | 0.1796628   |
| 0.1182979    | 0.1370450  | 0.5328752  | 0.08516803 | 0.2379504   | 0           |
| 0.1208198    | 0.03832954 | 0          | 0          | 0           | 0           |
| 0.0831240    | 0.08702261 | 0.1047122  | 0.1575859  | 0.3192399   | 0           |
| 0.4633052    | 0.7834847  | 0.09009104 | 0.5643319  | 0.5298272   | 1.278519    |
| 11.807670    | 0.0864874  | 1.3324150  | 0.09710747 | 0.1216581   | 0.04178485  |
| 0.3554095    | 0.01538194 | 0.03062033 |            |             |             |
| TCGA-DK-A3IS | 1529       | 0          | 0.1178927  | 0.10315     | 0.07773626  |
| 0.01644744   | 90.317370  | 0.04673738 | 0.09779562 | 0.07377398  | 0           |
| 0.05745724   | 0.5165143  | 0.1042507  | 0.03039868 | 0.07611405  | 0.2211999   |
| 0.09337904   | 0.02554191 | 0.03517926 | 0          | 2.53088874  | 8.19450     |
| 0.1152194    | 0.04934233 | 0.1538981  | 0          | 1.2561150   | 0.1608195   |
| 0.5451996    | 0.1370296  | 0.05713323 | 0.1238081  | 0.1306370   | 0.05142288  |
| 0.0149532    | 0.05337542 | 0.01666386 | 0.1384102  | 0.09916763  | 6.836538    |
| 0.06799749   | 0.1210951  | 0          | 0.4317454  | 0.1117459   | 5.76721     |
| 0.4405055    | 0.09474713 | 0.3427994  | 0.2624362  | 0.9343814   | 0.008596917 |
| 1.0553780    | 0.03609843 | 0.1914638  | 0          | 0.001546184 | 0.1028978   |
| 0.8705571    | 0.1038549  | 0.00475217 | 0.1608195  | 0.06244745  | 0.09415037  |
| 0.4731803    | 2.0723780  | 0.1013163  | 0.0083365  | 0.03131648  | 0.1218720   |
| 0.4287679    | 0          | 0.4259155  | 1.0820180  | 0.02078993  | 0.1640548   |
| 0.05536408   | 0.1169034  | 0          | 0          | 0.006215721 | 0.05026716  |
| 0.1779028    | 0.08289512 | 0          | 0.4638854  | 0.6407569   | 0.01259526  |
| 0.05178003   | 1.1717650  | 0.5130968  | 0          | 0.1008777   | 0.3258710   |
| 0.2991242    | 0          | 0          | 0.08112512 | 2.6520570   | 0.07101607  |
| 0.07219686   | 0.4414194  | 0.1723717  | 0.03143964 | 0.4430740   | 0.0507427   |
| 0.03861418   | 2.2929470  | 0.06919722 | 0.3471780  | 0.03453963  | 0.3837227   |
| 0.02704171   | 0.09388379 | 0          | 1.5239310  | 0.2491383   | 0.07666869  |
| 0.07377398   | 0.4486329  | 1.1704860  | 0.1805636  | 0.0234167   | 0.02661548  |
| 0.06536533   | 0.09721176 | 0.7054904  | 0.09173504 | 0           | 0.3280291   |
| 0.02922584   | 0          | 0.1099272  | 0          | 0.2268274   | 0.4573857   |
| 0.04855412   | 0.2969304  | 0.2960540  | 0.2787659  | 0.07639303  | 0.3741794   |
| 0.7698515    | 0          | 0.02626286 | 0.1118830  | 0.4260278   | 0.1344906   |
| 0.03236941   | 0.1782110  | 0.09558138 | 0.0325427  | 0.04638079  | 0.5054581   |
| 0.4754265    | 0.1294501  | 0.08274468 | 0.1432421  | 1.2220160   | 0.1002029   |
| 0.02728445   | 0.09280879 | 0.1550759  | 0.08112512 | 0.1106610   | 0.4906024   |
| 0.3417176    | 0.4001258  | 0.1183601  | 0.1329998  | 0           | 0.06396229  |
| 0.06769461   | 0.1398660  | 0.03808882 | 0.05652232 | 0           | 0.2291791   |
|              |            |            |            |             | 0.05015656  |



|              |             |             |             |            |            |            |            |
|--------------|-------------|-------------|-------------|------------|------------|------------|------------|
| 0.06091158   | 0.04379665  | 0.2627686   | 0.1642966   | 0.3634170  | 0.5813228  |            |            |
| 0.09004408   | 0.4391795   | 0.0591340   | 0.1270423   | 0.2952262  | 0.08634909 |            |            |
| 0.07956774   | 0           | 0.02015873  | 0.2175399   | 0.04379665 | 0.0336972  | 0.03477675 |            |
| 0            | 0.4069658   | 1.0276140   | 0.08304612  | 0.06629199 | 0          | 0.1158636  | 0.1767144  |
| 0.03270276   | 0.1383157   | 0.05983244  | 0.0157242   | 0.3672492  | 0.7785573  |            |            |
| 0.03911825   | 0.0531999   | 0.08105301  | 0.1187963   | 0.01914437 | 0.1759651  |            |            |
| 0.1667605    | 0.01911628  | 0           | 0.2100298   | 0          | 0          | 0.2522079  | 0.04305224 |
| 0.9201574    | 3.1680190   | 0.1264989   | 0.03418996  | 0.04509626 | 0.1893762  | 0          |            |
| 0.0407438    | 0.4077113   | 0.003749677 | 0.05225053  |            |            |            |            |
| TCGA-XF-A9SJ | 98          | 1           | 0.0630754   | 0.01686292 | 0          | 0.07292964 | 0.07259814 |
| 40.972150    | 0.2177572   | 0.1438882   | 0.1085448   | 0.01558204 | 0.7603169  |            |            |
| 0.1690755    | 0.9353298   | 0.02556429  | 0.1146105   | 0.03732926 | 0          | 0.1717375  |            |
| 0.02818516   | 0.1035196   | 0.1296245   | 1.77100139  | 0.498350   | 0.1161570  | 0.3220958  |            |
| 0.2177944    | 0.05660817  | 0           | 1.0267450   | 0.7314093  | 0          | 0          | 0.2673869  |
| 0.07560517   | 0.05043661  | 0.1821607   | 0.05606074  | 0.3317369  | 0.06600264 |            |            |
| 0.04105087   | 0           | 0.4072901   | 0.1459069   | 1.4725580  | 0.05002288 | 0          | 0.2153787  |
| 0.6352338    | 0.08220672  | 3.2363490   | 0.04195165  | 0.08101532 | 0.08364175 | 0          |            |
| 0.5616384    | 0.04043441  | 0.04918969  | 0.9316762   | 0.05590057 | 0.05311218 |            |            |
| 0.2464907    | 0.2032748   | 0.02047432  | 0.09251928  | 0.1418196  | 0.07319224 |            |            |
| 0.6621480    | 0.01398388  | 0.05070347  | 0.008352719 | 0.0808062  | 0.0409528  |            |            |
| 1.8875520    | 0.06132811  | 0.01974704  | 0.07172487  | 0.01732008 | 0          | 0.2336492  |            |
| 0.05994699   | 0.4272655   | 0           | 0           | 0.1097165  | 0.2005402  | 0          | 0.1146678  |
| 0            | 0.02743586  | 0           | 0.04504867  | 0.09467594 | 0          | 0.06316449 | 0.2988155  |
| 1.6921250    | 0.09707769  | 0           | 0           | 2.5076890  | 0.6830295  | 0.0409528  | 0.02581267 |
| 0.5666335    | 0.03566225  | 0.2697424   | 0           | 0          | 0          | 2.7936150  | 0.6328367  |
| 0.03349847   | 0.05311218  | 0.04639052  | 0.2958820   | 0.5301836  | 0.2607607  | 0          | 0          |
| 0.04869741   | 0.8761025   | 0           | 1.0216170   | 0.2540935  | 1.3272520  | 0.1330966  | 0          |
| 0.1467660    | 0.06211175  | 0.8007795   | 0.2443741   | 0.03760128 | 0          | 0.1170693  | 0          |
| 0            | 0.6388637   | 0           | 0.06890671  | 0.1566391  | 0          | 0          | 0.9947490  |
| 0.3235844    | 0.05807852  | 0.08600088  | 0.05618148  | 0.08086882 | 0          | 0.4672287  |            |
| 0.08607612   | 0.4911161   | 0.03571921  | 0.1985811   | 0.2903926  | 0.1106029  |            |            |
| 0.2669459    | 0.08469784  | 0.0839033   | 0.05562246  | 0          | 0          | 0.3458324  |            |
| 0.09893906   | 0.08028807  | 0.1508145   | 0.0582677   | 0.4821613  | 0          | 0.07961424 |            |
| 0.09915844   | 0.2464156   | 0           | 0.04058118  | 0.04458266 | 0.8826406  | 0.1965734  |            |
| 0.08028807   | 0.06827551  | 0.6844968   | 0           | 0.2713620  | 0.5510160  | 0.02091696 |            |
| 0.1822925    | 0.1944368   | 0.1567306   | 0.01304564  | 0.1228584  | 0.6964044  | 0          |            |
| 0.007114295  | 0.09407406  | 0           | 0.07484595  | 0          | 1.2855550  | 0.2951845  | 0          |
| 0.4327786    | 0.1611548   | 0.6319195   | 0.3258321   | 0.07360181 | 0.3903953  | 0          |            |
| 0.07009476   | 0.006581377 | 0           | 0.07804617  | 0          | 0.1548903  | 0.1042088  | 0          |
| 0.04957922   | 0           | 0.04242928  | 0.05362165  | 0.3165102  | 0.06109352 | 0          | 0          |
| 0.1136479    | 0.08666755  | 0           | 0.1271913   | 0.0880324  | 0          | 0          | 0.5040215  |
| 0            | 0.5366455   | 0.07490864  | 0.08450223  | 0.1057480  | 0.06542861 | 0.02812607 |            |
| 0.02730187   | 0.09911966  | 0.04014404  | 0.09693741  | 0.8489803  | 0.03167171 |            |            |
| 1.13548      | 2.9032340   | 0.9054761   | 0           | 0          | 0.04848272 | 0.0299735  | 0.3599232  |

[illegible]

|              |             |             |             |             |             |             |             |             |
|--------------|-------------|-------------|-------------|-------------|-------------|-------------|-------------|-------------|
| 0.24032995   | 0.200426796 | 0.085832125 | 0           | 0           | 0.377661349 | 0           | 0.186499432 | 0           |
| 0.316129082  | 0.104285185 | 0.099384566 | 0.161525221 | 0.293526192 | 0.027523472 |             |             |             |
| 0.104045764  | 0.137161489 | 0.17392299  | 0.385228334 | 0           | 0.589258843 | 0.295707992 |             |             |
| 0.105323882  | 0           | 0.600824874 | 0.437365166 | 2.102887059 | 0.049599052 | 2.346700051 |             |             |
| 0.032962961  | 0           | 0.179838738 | 0.430247107 | 0.02658584  | 0.795536639 | 0           |             |             |
| 0.062794049  | 0.249791759 | 0.040054992 | 0.01344811  | 0.079552513 | 0.055890686 |             |             |             |
| 0.129801773  | 0.06021935  | 0.008266509 | 0.119892492 | 0.039501374 | 0.204720917 |             |             |             |
| 1.162034921  | 2.803849412 | 0.035248393 | 0.014501533 | 0.007782247 | 0.31799873  | 0           |             |             |
| 0.168652596  | 0.331489586 | 0           | 0.303091274 | 1.083688446 | 0.180822807 | 0.084315954 |             |             |
| 0.118548406  | 0.192614167 | 0.474497593 | 0           | 0           | 0.054061952 | 0           | 0.003804331 |             |
| 0.829632155  | 0           | 0           | 0.658398222 | 1.114611334 | 0.048201432 | 0           | 0           | 0           |
| 1.111806776  | 0.170008324 | 0           | 0.267033277 | 0.154598213 | 0.042163149 | 0.654613005 |             |             |
| 0.073638703  | 0           | 0.04703967  | 1.056382024 | 0.061767043 | 0.062349751 | 0.013201645 |             |             |
| 0            | 0.329082504 | 0.199896366 | 0.185104544 | 0.077073745 | 0           | 0.088268095 |             |             |
| 0.139138392  | 1.700580345 | 0.090277613 | 0.545479915 | 0.060082487 | 0.40986503  |             |             |             |
| 0.078679448  | 0           | 0.489939048 | 0           | 0.932188895 | 0           | 0.069153237 | 0.048956101 |             |
| 0.138409919  | 0.19249729  | 0.731631765 | 0.426921525 | 0           | 0           | 0           | 0           | 0           |
| 0.255670159  | 0.212766957 | 0.210815745 | 1.076385793 | 0.2746628   | 0.711746389 |             |             |             |
| 0.06642285   | 0.191220936 | 0.049229599 | 0.236742935 | 0.828013422 | 0           | 0.168922009 |             |             |
| 0.281736708  | 0.429160624 | 0.435882843 | 0.107971042 | 0.350481176 | 1.041580082 |             |             |             |
| 0.131523853  | 0.045684841 | 0           | 0.332210563 | 0.077983169 | 0.047461929 | 0.04692278  |             |             |
| 0            | 0.118761431 | 0.056608768 | 0.080680451 | 0.175851183 | 0.507486634 | 0.225181384 |             |             |
| 0.143936267  | 0.091043972 | 0.525633925 | 0.232406984 | 0           | 0.040360755 | 0.179838738 |             |             |
| 0.376317359  | 0.19249729  | 0.247555246 | 0           | 1.136708519 | 0.427833751 | 0.205890144 |             |             |
| 0.123389939  | 0.58101746  | 0.111263866 | 0.161196917 | 0.218690314 | 0.25720297  | 0           |             |             |
| 0.056535079  | 0           | 0.099665578 | 0           | 0           | 0.241053524 | 0.238164815 | 0.689642464 |             |
| 0.963070836  | 0.243652483 | 0.175074798 | 0.029389988 | 0           | 0.105044879 | 0.150206218 |             |             |
| 0.092273279  | 0           | 0.019481426 | 0.308012752 | 0.152370573 | 0           | 0.060494953 | 0           |             |
| 1.024908298  | 0.869311947 | 0           | 0           | 0           | 0.235138578 | 0           | 0.081267428 | 0.150377102 |
| 0            | 0.013676303 | 0           | 1.137627425 | 0.06804709  | 0.092542454 | 0           | 0.191888234 |             |
| 0.016651036  | 0.258672157 | 0.328761526 | 0.066506401 | 0.032278748 | 0.144761977 |             |             |             |
| 0.094923858  | 0.152810951 | 0.452016098 | 0.037445176 | 1.394101465 | 1.306856724 |             |             |             |
| 0.134473637  | 0.118948456 | 0           | 0.164712115 | 0           | 0.035437392 | 0.070922319 | 0           |             |
| 0.168797558  |             |             |             |             |             |             |             |             |
| TCGA-C4-A0F6 | 700         | 0           | 0.09478065  | 0.07601751  | 0           | 0.1534235   | 0           | 53.178370   |
| 0.1205526    | 0.08648582  | 0.4893166   | 0.04682891  | 0.3163106   | 0.06351558  |             |             |             |
| 0.4831335    | 0.06402389  | 0.03360394  | 0           | 0.1667205   | 0.4129      | 0.02823508  |             |             |
| 0.07777718   | 0           | 1.72951739  | 0.040840    | 0.2618162   | 0           | 0           | 0.08506263  | 0           |
| 0.8571362    | 0.1570081   | 0.0592588   | 0.1527261   | 0.5524621   | 0.1704129   |             |             |             |
| 0.1768407    | 0.5474499   | 0.2166172   | 0.06996302  | 0.1432590   | 0.04022957  |             |             |             |
| 0.3315764    | 0.2448068   | 0.1096239   | 3.9148630   | 0.4510032   | 0.1338635   |             |             |             |
| 0.1176874    | 0.1909076   | 0.1852927   | 3.9789170   | 2.7999780   | 0.2723171   |             |             |             |
| 0.8842037    | 0.2637342   | 0           | 0.03801353  | 1.3999890   | 0.6384749   | 0.1058260   |             |             |
| 0.05127644   | 0.06319304  | 0.1420708   | 0.2749570   | 0.5357590   | 0.03151946  | 0.3428545   |             |             |

|              |             |            |            |            |             |            |
|--------------|-------------|------------|------------|------------|-------------|------------|
| 0.01255127   | 0.2601942   | 1.53845    | 1.527261   | 0.08959931 | 0.01843101  | 0.03956402 |
| 0.1886112    | 0.0780784   | 0.0535881  | 0.2457661  | 0.09007973 | 0.599231    |            |
| 0.4349481    | 0.3217485   | 0.3709490  | 0.06120171 | 0.1723064  | 0           | 0          |
| 0.04122667   | 0.03704492  | 0.01450557 | 0.1924767  | 0          | 0.1898290   | 0.2245085  |
| 2.252091     | 0.09467853  | 0          | 0          | 0.228959   | 2.11961     | 0.1080377  |
| 0.1964897    | 0           | 1.365323   | 0.3275741  | 0          | 0.05978601  | 2.583288   |
| 0.07924467   | 0           | 0          | 0.278836   | 0.3175779  | 0.3528935   | 0.4897921  |
| 0.05609306   | 0.1646448   | 2.456121   | 0.07649343 | 0.321884   | 0.07636305  | 0.1637197  |
| 0.04999961   | 0.179358    | 0.713508   | 0.09333261 | 1.388419   | 0.9180257   | 0.06905776 |
| 0.1172766    | 0.2446583   | 1.115859   | 0.9391232  | 0          | 0.05177156  | 0          |
| 0.1432825    | 0.5849084   | 0          | 0.1071762  | 0.5851316  | 0           | 0.5815340  |
| 1.002977     | 1.716732    | 0.1736421  | 0.2146948  | 0.2387193  | 0.2181801   | 0.3877958  |
| 0.126672     | 0.3818152   | 0.8825448  | 0.2507443  | 0.01935469 | 0           | 0.2435941  |
| 0.2477857    | 0.06032269  | 0.03578247 | 0.04377816 | 0.2113191  | 0           | 0.05127122 |
| 1.937014     | 0.2030557   | 0          | 0.06097956 | 0.1035337  | 0.4715753   | 0.07384558 |
| 0.05129731   | 0.3428545   | 0.05978601 | 0.1631055  | 1.4738180  | 0.2518324   |            |
| 0.3408669    | 0.3401843   | 0.05880935 | 0.2461519  | 0.9333261  | 0.5634103   |            |
| 0.0534517    | 0.1590311   | 0          | 0.0749785  | 0          | 0.3166799   | 0.7762316  |
| 0.09682922   | 0.3612875   | 0.4237805  | 0.5113004  | 0.1836051  | 0.2433161   |            |
| 0.9912024    | 0.1680921   | 0.03510945 | 1.5625490  | 0.2345532  | 0           | 0.01485619 |
| 0.637545     | 0.09682922  | 0.07450053 | 0.1537746  | 0.06375662 | 1.020616    | 0.9621877  |
| 0            | 0           | 0          | 0.2134672  | 0.3906947  | 0.1136173   | 0.3057997  |
| 0.3690657    | 0.6885193   | 0.08648582 | 0.1764280  | 0.1500826  | 0.08465188  |            |
| 0.1643823    | 0.6882171   | 0          | 0.123076   | 0.0876134  | 0.06032269  | 0.1942182  |
| 1.225035     | 0.1427751   | 1.443739   | 1.741023   | 0.1242996  | 0.03779498  | 0          |
| 0.08742343   | 0.09007973  | 0.2478854  | 0          | 0.0825141  |             |            |
| TCGA-CF-A710 | 368         | 0          | 0.2958778  | 0.1054687  | 0           | 0.3801140  |
| 0.05726927   | 0.310622    | 0.1799891  | 0.3394455  | 0.01624292 | 0.9694174   |            |
| 0.3965545    | 1.157812    | 0.2043055  | 0.03205332 | 0.1167375  | 0.007710418 |            |
| 0.3938472    | 0.03917411  | 0.4046631  | 0.06756114 | 2.544444   | 68.44291    | 0.1135159  |
| 0.1060285    | 0.07567725  | 0.2950455  | 2.393293   | 2.735192   | 0.05445933  | 0.08221726 |
| 0.1412642    | 0.4877733   | 0.3349502  | 0.2628789  | 0.3323017  | 0.333934    |            |
| 0.2972725    | 0.05351268  | 0.06883924 | 0.05111534 | 0.6368468  | 0.190119    |            |
| 9.729626     | 0.208578    | 0.4333603  | 0.1530775  | 2.118963   | 0.4284668   | 8.392209   |
| 0.1749238    | 1.308997    | 0.5086040  | 1.7319830  | 0.2373345  | 1.7265620   | 0          |
| 0.7341289    | 0.1412642   | 0.1493989  | 0.2980975  | 0.1478346  | 1.525931    |            |
| 0.5840422    | 0.02915396  | 0.3875957  | 0.2612095  | 0.3249004  | 1.921038    |            |
| 13.36965     | 0.03107812  | 0.166216   | 0.1921226  | 0.1121504  | 0.07221872  | 0          |
| 0.2192031    | 0.2499581   | 0.4156947  | 0          | 0.1275436  | 0.3431098   | 0.1045228  |
| 0.04245645   | 0.2988281   | 0.08149858 | 0          | 0.1525307  | 0.07709568  | 0.1341695  |
| 0.6269808    | 0.5509304   | 0.06584348 | 0.5061699  | 0.9323437  | 0.0231811   |            |
| 0.2361218    | 0           | 1.072116   | 3.2131     | 2.435785   | 0.04268973  | 0.1950791  |
| 0.2230487    | 0.5623661   | 0.1623161  | 0          | 0.1658975  | 3.784552    | 0.2722967  |
| 0.2198924    | 0.005819873 | 0.1107297  | 0.4835808  | 0.3524929  | 0.3931749   |            |

|              |             |             |             |             |             |             |           |
|--------------|-------------|-------------|-------------|-------------|-------------|-------------|-----------|
| 0.06795508   | 0           | 0.03891251  | 0.1395977   | 1.8810440   | 0.1061291   | 0.1717656   | 0         |
| 1.2183450    | 0.03468541  | 1.8248720   | 0.5219685   | 0.1942383   | 1.2328510   | 0.3821081   |           |
| 0.3135685    | 0.1726562   | 0.3661036   | 0.1697228   | 0.2580287   | 1.6649      | 0           | 0         |
| 0.08164131   | 0.25063     | 0.2484925   | 2.2542160   | 0.04689858  | 0.03717479  | 0.3087231   |           |
| 0            | 0.1792969   | 0           | 0.1264481   | 0           | 1.6002912   | 0.1738370   | 0.2710302 |
| 0.4968084    | 1.2108361   | 0.0568610   | 0.54189     | 0.5297408   | 1.7055070   | 0.05798158  |           |
| 0.1342661    | 0.1715970   | 0.5294847   | 0.2406492   | 0.04184667  | 0.04137131  |             |           |
| 0.1214780    | 0.2094213   | 0           | 0.2489728   | 0.4651382   | 0.4474454   | 0.158832    |           |
| 0.3807211    | 0.1309709   | 1.44486     | 0.2049107   | 0.04184667  | 0           | 0.2378428   |           |
| 0.7465386    | 0.3960198   | 0.4939722   | 0           | 0.4719952   | 0.5179687   | 0.7442775   |           |
| 0.1223905    | 0.04268973  | 0.1569602   | 0.07106278  | 0.1557367   | 0.4045141   |             |           |
| 0.05841753   | 0.09319103  | 0           | 1.1423630   | 0.07692605  | 0.2335530   | 0.2686870   | 0.5674264 |
| 0.08399493   | 1.5707970   | 0.2547387   | 0.1534470   | 0.6455119   | 0.1295642   | 0.1704913   |           |
| 2.6035650    | 0.6180309   | 0.1220345   | 0.4293688   | 0.07557687  | 0.9311023   |             |           |
| 0.03358587   | 0.05168203  | 0           | 0.04422883  | 0.6986988   | 0.6700205   | 0.1273694   |           |
| 0.1016733    | 0.04214935  | 0.1777021   | 0.09034338  | 0.2292883   | 0.07955151  |             |           |
| 0.1835322    | 0           | 0           | 1.4329050   | 0.1499909   | 0.1495884   | 0           | 0.1431572 |
| 0.05383047   | 0.3116935   | 1.0742070   | 0.3225088   | 0.02845982  | 0.6017081   | 0.12554     |           |
| 0.2020976    | 0.5509197   | 0           | 2.4128049   | 0.6344040   | 0.1994030   | 0.02621889  | 0         |
| 0.07261244   | 0.1415092   | 0.03124476  | 0.9848701   | 0.09201517  | 0.1373787   |             |           |
| TCGA-FD-A3B6 | 1005        | 1           | 0.026506089 | 0.056690248 | 0           | 0.1225885   | 0         |
| 23.761225703 |             | 0.046173998 | 0.375663694 | 0.169304658 | 0           | 0.01309604  |           |
| 5.011769963  | 0.248676219 | 1.228288698 | 0.028647587 | 0.401746684 | 0.156868256 |             |           |
| 0.22379802   | 0.057735229 | 0.015792283 | 0.108754728 | 0           | 2.509702106 |             |           |
| 27.508626495 |             | 0.103726588 | 0.056991106 | 0.549140759 | 0.142730256 | 0           |           |
| 0.575290319  | 0.087816902 | 0           | 0.028473965 | 0.308999982 | 0.063542915 | 0.141299377 |           |
| 0.612393225  | 0.16154284  | 0.14185104  | 0.419124815 | 0.088503848 | 0.21636467  |             |           |
| 0.171154983  | 0.061314248 | 0.266564781 | 0           | 0           | 0.057596199 | 0.160166055 |           |
| 0.172728098  | 2.090588503 | 0.035258569 | 0.408539502 | 0.105445981 | 0           | 0.167178383 |           |
| 0            | 0.015355539 | 3.610656986 | 0.046982043 | 0.133915561 | 0.295949875 | 0           |           |
| 0.021031742  | 0.381723574 | 0.039731114 | 0.153787374 | 0.299657676 | 0.052887853 |             |           |
| 0.085228195  | 0           | 0.203742467 | 0.653962499 | 0.488125119 | 0.150342537 | 0.123704775 |           |
| 0.022128722  | 0.180845072 | 0.029113582 | 0.029972595 | 0.333832696 | 0.100765775 |             |           |
| 0.335158521  | 0.304090891 | 1.028334724 | 0.041495425 | 0           | 0.034230997 | 1.01192092  |           |
| 0.525673205  | 0.119445871 | 0.053803566 | 0           | 0.013521958 | 0.53827496  | 0           | 0         |
| 0.05422377   | 0.731396124 | 0.074760088 | 0           | 0           | 0.032015021 | 0.307359158 |           |
| 0.211494726  | 0.172095395 | 0.092201411 | 1.50196004  | 0.05994519  | 0.656257105 |             |           |
| 0.314086079  | 0           | 0.066878353 | 2.157799433 | 0           | 0.443226818 | 0.009384678 |           |
| 0.04463852   | 0.194946235 | 0.355251741 | 0.218312484 | 0.602685096 | 0           | 0           |           |
| 0.180765754  | 1.472653503 | 0.021391937 | 3.863814272 | 0.128132844 | 1.356912153 |             |           |
| 0.195758511  | 0.100317529 | 0.007255914 | 0           | 0.921521058 | 0.10269299  | 0.017556817 |           |
| 0.034801513  | 0.065594475 | 0.045613634 | 0.069346189 | 0.87544179  | 0.148853997 |             |           |
| 0.028956575  | 0.032912114 | 0           | 0.040069972 | 0.654295372 | 0.037812509 | 0.029972595 |           |
| 0.470166138  | 0.048812512 | 0.144560131 | 0.047218133 | 0.305850549 | 0           | 0.841469422 |           |

|                    |                           |                   |                    |                           |                            |             |
|--------------------|---------------------------|-------------------|--------------------|---------------------------|----------------------------|-------------|
| 0.40446483         | 0                         | 0.240163797       | 0.534076507        | 0.488125119               | 0.042605315                | 0.070849452 |
| 0.071184913        | 0.493619961               | 0                 | 0.043301422        | 0.046117343               | 0.445069133                | 0.332616232 |
| 0.303654136        | 0.166780414               | 0                 | 0.996205039        | 0.040241578               | 0.15294256                 | 0.458361392 |
| 0.387480765        | 0.160075103               | 0.068213492       | 0.088565025        | 0.131879418               | 0.578240526                | 0           |
| 0                  | 0.511369172               | 0.100317529       | 0.136840901        | 2.320158048               | 0.087899051                | 0.973618663 |
| 0.236045046        | 0.043908451               | 0.131571648       | 0.172095395        | 1.17059635                | 0.171885522                |             |
| 0.113605958        | 0.143305731               | 0.188399169       | 0.094357241        | 0                         | 0.106274178                | 0           |
| 0.054157974        | 0.265120172               | 0.372470249       | 0.163415801        | 0.205385979               | 0.148462018                |             |
| 0.871190196        | 0.052231287               | 0.019637217       | 0.024891148        | 0.10677737                | 0.098391712                | 0           |
| 0.12463917         | 0.300284694               | 0.027078987       | 0.041669217        | 0.172016632               | 0.071319989                |             |
| 0.120177887        | 0.785762387               | 0.10269299        | 0.163950422        | 0                         | 0.095516224                | 0.072840376 |
| 0.057770726        | 0.085519077               | 1.701711783       | 0.262496669        | 0.107340344               | 0.654667808                |             |
| 0.02418638         | 0.043857216               | 0.601370147       | 0.167886696        | 0.035510257               | 0.25743585                 |             |
| 0.192464842        | 3.994951053               | 0                 | 0.200914081        | 0.539829575               | 0.08147175                 | 3.510953758 |
| 0.133093605        | 1.68841716                | 3.861537757       | 0.09124836         | 0.549621197               | 0.278825179                |             |
| 0.175633805        | 0.065196243               | 0.050382888       | 0.176458376        | 0.03245737                | 0.092302638                |             |
| TCGA-GC-A3YS       | 758                       | 0                 | 0.05953543         | 0.04774957                | 0.1619333                  | 0.2753465   |
| 0.04568249         | 46.124930.1037116         | 0.2271714         | 0.4074384          | 0.2049059                 |                            |             |
| 0.0441226          | 1.2336390.5186560.9380137 | 0.0884750.1266477 | 0                  | 0.1535947                 |                            |             |
| 0.1620991          | 0.1064133                 | 0.04885488        | 0.1223496          | 1.65815475.655930.3837329 |                            |             |
| 0.9280575          | 1.09638                   | 0.1068623         | 0                  | 0.7968331                 | 0.3944918                  | 0.1861138   |
| 0.03197774         | 0.6624985                 | 0.1486708         | 0.1586865          | 0.2149217                 | 0.143625                   |             |
| 0.1153596          | 0.2976478                 | 0.09770976        | 0.03471268         | 0.1537727                 | 0.5508727                  |             |
| 2.9295110.04721546 | 0.0560566                 | 0.2587341         | 0.5995826          | 0.1551861                 |                            |             |
| 4.8092840.0395972  | 0.5735138                 | 0.09210546        | 0.3173731          | 0.3423676                 |                            |             |
| 0.1526605          | 0.08357225                | 1.2702270         | 0.05013137         | 0.2991304                 | 0.03197774                 |             |
| 0.06871196         | 0.3334297                 | 0.08924021        | 0.2417957          | 0.1923035                 | 0.03299767                 |             |
| 0.1276209          | 0.09460729                | 0.1198546         | 0.5798162          | 0.5938723                 | 0.3376849                  |             |
| 0.1505041          | 0.07455511                | 0.06769947        | 0.09808819         | 0.2692862                 | 0.08821446                 |             |
| 0.2263304          | 0.1882002                 | 0.09106929        | 0.2309747          | 0.08802509                | 0.1892853                  |             |
| 0.07688637         | 0.2705809                 | 0.07379479        | 0                  | 0.1035843                 | 0.04653872                 | 0.009111516 |
| 1.4140290          | 0                         | 0.5640903         | 1.4146260.4897635  | 0.1221726                 | 0                          | 0.1438181   |
| 4.0928520.74649    | 0.03865441                | 0.2619129         | 0.3839822          | 0.1009823                 | 0.9246135                  |             |
| 0.1763675          | 0.04378695                | 0.1877696         | 2.5300750.09862294 | 0.1991067                 |                            |             |
| 0.00526974         | 0.05013137                | 0.8757389         | 0.2792763          | 1.2493910.3076576         |                            |             |
| 0.08117426         | 0.1057027                 | 0.2757862         | 1.4070210.1081092  | 1.4464210.2398331         |                            |             |
| 1.7950030.2512537  | 0.3755393                 | 0.3096532         | 0                  | 1.8721510.1153296         |                            |             |
| 0.2918148          | 0.1172517                 | 0.1841650         | 0.6230349          | 1.1798                    | 0.1253781                  | 0           |
| 0.04538776         | 0.1800026                 | 0.5715171         | 0.08493082         | 0.3029470.4037807         |                            |             |
| 0.4385519          | 0.2841099                 | 0                 | 0.1908256          | 0                         | 1.8900281.4107140.05453568 |             |
| 0.1685728          | 0.5997956                 | 0.4111424         | 0.5741758          | 0.4774057                 | 0.3597496                  |             |
| 0.5147636          | 0                         | 0.09725949        | 0.1294804          | 0.6630474                 | 0.1245151                  | 0.07578208  |
| 0.1947952          | 0.04124816                | 0.5878388         | 0                  | 0.1610273                 | 0.4679669                  | 0.1950722   |
| 0.3954998          | 0.2681255                 | 0.03060404        | 1.29594            | 1.0204760.1515642         | 0.03222185                 |             |

|                    |                   |                    |                           |                    |                    |            |
|--------------------|-------------------|--------------------|---------------------------|--------------------|--------------------|------------|
| 1.2203750.2628775  | 0.4610383         | 0.8945572          | 0                         | 0.3746504          | 0.2294055          |            |
| 0.9369179          | 0.1477618         | 0.2319265          | 0.8172089                 | 0.1930364          | 0.1007253          |            |
| 0.3718264          | 0.2115820.1197047 | 0.03715723         | 0.6365409                 | 0.06965448         |                    |            |
| 0.08459042         | 0.1216444         | 1.0094240.3042207  | 0.6423355                 | 0.4228750.3612495  |                    |            |
| 0.8767407          | 0.1290486         | 0.1543753          | 0.5777171                 | 0.07994435         | 0.4051630          |            |
| 0.2052985          | 0.2388750.1216444 | 0.09359339         | 0.0965918                 | 0.2002401          |                    |            |
| 0.3795919          | 2.1647650.1153296 | 0.2761872          | 0.03816512                | 0.08045226         |                    |            |
| 0.1636070.05190362 | 0.09604236        | 0                  | 0                         | 0                  | 1.1244630.08148768 | 0.04925393 |
| 0.4502466          | 0.2238977         | 0.07089753         | 0.1514406                 | 0.7565180.1858329  | 0                  |            |
| 0.5998641          | 0.3410193         | 0.30499            | 1.1303570.0298942         | 2.0610656.523916   |                    |            |
| 0.1659146          | 0.5222911         | 0.06262703         | 0.06574863                | 0.05491407         | 0.0282913          |            |
| 0.3255681          | 0.00520733        | 0.165857           |                           |                    |                    |            |
| TCGA-XF-A9T2       | 575 1             | 0.1505352          | 0.09658775                | 0.2183723          | 0.3063338          |            |
| 0.1386097          | 94.652810.3146815 | 0.2625840.1648332  | 0                         | 0                  | 1.08574            |            |
| 0.6456225          | 0.5022563         | 0.03253947         | 0.04269712                | 0.1425435          | 0                  | 1.114839   |
| 0.08968863         | 0.04941179        | 0.1237443          | 1.476353118.25780.1108878 | 0.06473357         |                    |            |
| 0.9702679          | 0                 | 0                  | 0.6534457                 | 0.4987358          | 0                  | 0          |
| 0                  | 0.4347433         | 0.1681983          | 0.3889153                 | 0.1820247          | 0.04770794         | 0.09362234 |
| 0.07776282         | 0                 | 7.4829580.09550735 | 0.2267824                 | 0.09345838         | 0.9702679          |            |
| 0.2354326          | 10.647410         | 0.8507421          | 0.1330791                 | 0                  | 0.7372208          | 0.7720034  |
| 0.08318324         | 0.2964707         | 0                  | 0                         | 0.06723116         | 0.1293691          | 0.04343452 |
| 0.1766446          | 0.09025748        | 0                  | 0.8752303                 | 0.02669905         | 0.1774791          | 0.07973812 |
| 0.3306024          | 0.07819009        | 0.1848129          | 0.2846119                 | 0.6088790.02513499 |                    |            |
| 0.06847119         | 0.09920632        | 0                  | 0.5799302                 | 0.4578208          | 0.1631533          | 0          |
| 0.8760285          | 0.3456401         | 0                  | 0.07776282                | 0.2189322          | 0                  | 0          |
| 0.04706923         | 0.0491487         | 0.3402583          | 0.4657286                 | 0.2411965          | 0.09724781         |            |
| 1.5230580.04245827 | 0                 | 0                  | 0.1454575                 | 1.5959550.2059089  | 0.1563802          |            |
| 1.6017120.1941797  | 0                 | 1.3281890.1783779  | 0                         | 0                  | 1.5979730          | 1.0068820  |
| 0                  | 0.2657165         | 0.2421084          | 0.6657854                 | 0.1244659          | 0                  | 0          |
| 2.9709490.09719246 | 2.23369           | 0                  | 0.5389661                 | 0.1270589          | 0                  | 0.1153832  |
| 1.6935590.1166442  | 0.1834662         | 0.07905887         | 0                         | 0.1036208          | 0.3150685          |            |
| 1.1932490          | 0                 | 0                  | 0                         | 0.2730818          | 0.3303040          | 0.2042669  |
| 0.9851951          | 0.4290632         | 0.5404024          | 0.07950053                | 1.6566960.8291843  |                    |            |
| 0.05515735         | 0.2045932         | 0.6824620.8316582  | 0.04399401                | 0.2280114          |                    |            |
| 0.2425670.4004858  | 0.1061985         | 0.09836817         | 0.3666779                 | 0.6190206          |                    |            |
| 0.1259345          | 0.6131675         | 0.2273258          | 0                         | 0.2301444          | 0                  | 0.1954354  |
| 0.6626220.4704747  | 0                 | 0.1549611          | 0.1702409                 | 0.8363596          | 0.1876562          |            |
| 0.07664594         | 0.1955349         | 0                  | 0.1519281                 | 0.6217251          | 0.6733057          | 0          |
| 0.3648871          | 0.5568494         | 0.09974717         | 0.2739846                 | 0                  | 0.0718717          | 0.1301579  |
| 0.0814988          | 0.2806455         | 0.3209909          | 0.1548098                 | 0                  | 0.1207119          | 0.140897   |
| 0.08555468         | 0                 | 0.6096204          | 0.6153771                 | 0.1856165          | 1.0109170.08431558 |            |
| 0.6168591          | 0.2135776         | 0.1784401          | 0.08795953                | 0                  | 0                  | 0          |
| 0.3552912          | 0.1230311         | 0                  | 0.09769288                | 0.08100908         | 0.2730091.1714210  | 0          |
| 0                  | 0.2169849         | 0.1654720.07874292 | 0.7285288                 | 0                  | 0                  | 0.5439639  |

|              |            |            |            |             |            |            |                        |
|--------------|------------|------------|------------|-------------|------------|------------|------------------------|
|              | 0.5248990  | 0.05494439 | 0.04981539 | 0.7969134   | 0.1191842  | 0.1523746  |                        |
|              | 0.2019018  | 0.6870661  | 0.1074007  | 0           | 0.2449073  | 4.2155270  | 2.082526               |
|              | 0.1814099  | 0.7504416  | 7.5263660  | 0.1678059   | 0.2401113  | 0          | 0.7979773              |
|              | 1.1108010  | 0.4867608  | 0          | 0.1887162   |            |            |                        |
| TCGA-UY-A78O | 2312       | 0          | 0.09546636 | 0.08507497  | 0.1154060  | 0.2060446  |                        |
|              | 0.02441762 | 96.2124    | 0          | 0.1618997   | 0.4065204  | 0          | 0.01572257 0.3106737   |
|              | 0.1279502  | 1.3566620  | 0.02579483 | 0.08179705  | 0.1129977  | 0.1119511  |                        |
|              | 0.1732863  | 0.1421967  | 0          | 0           | 2.80090964 | 0.870850   | 0.1245299 0.01710529 0 |
|              | 0          | 0          | 2.3022330  | 0.1054294   | 0.03979168 | 0          | 0.2360735 0.1716458    |
|              | 0.05089146 | 1.1487720  | 0.09697084 | 0.1115762   | 0.02219929 | 0.1008513  |                        |
|              | 0.03710836 | 0.3698669  | 0.03680568 | 5.3490180   | 0.1514220  | 0.1498133  | 0.06914763             |
|              | 1.9228880  | 0.3317924  | 10.633230  | 0.12699     | 0.2861108  | 0.1828581  | 0 1.0743750            |
|              | 0.03261617 | 4.9092980  | 0.05359117 | 0.2131831   | 0          | 0.00229544 | 0.1867073              |
|              | 0          | 0.4431139  | 0.1541814  | 0.007054998 | 0.1449554  | 0.05899633 | 0.1048306              |
|              | 0.4958655  | 3.1742910  | 0.2105776  | 0.4579208   | 0.01992512 | 0.2894869  |                        |
|              | 0.06990514 | 0.1079516  | 0.2121807  | 0.06048762  | 0.1724475  | 0.0730158  |                        |
|              | 0.06172882 | 0.1273119  | 0.1011744  | 0.04109632  | 0.2314039  | 0          | 0.0956012              |
|              | 0.04613882 | 0.1243764  | 0.01298712 | 0.1910595   | 0.08204321 | 0.06373413 |                        |
|              | 0.2912316  | 1.0244310  | 0.01869873 | 0           | 0          | 0.1153077  | 3.0047371 0.0881940    |
|              | 0.01302273 | 1.0995070  | 0.03598386 | 0.2865001   | 0.1256929  | 0.04680888 | 0                      |
|              | 5.0441840  | 0.1581440  | 0.6385438  | 0.02253372  | 0.05359117 | 0.3276622  | 0.1706002              |
|              | 0.1292533  | 0.5262247  | 0          | 0           | 0.06142073 | 1.6228720  | 0.02568228 0.04987889  |
|              | 0.1025540  | 0.7295758  | 0.03357423 | 0.2007285   | 0.1306673  | 0.0626719  |                        |
|              | 1.7527410  | 0.3082224  | 0.1011744  | 0           | 0.07875003 | 0.1095237  | 0.2913896              |
|              | 1.63959    | 0          | 0.06952814 | 0           | 0          | 0.4329572  | 1.091 0 0 0.1272807    |
|              | 0.1758069  | 0.2169412  | 0          | 0.3671916   | 0          | 0.6061401  | 0.4618968 0            |
|              | 0.1081240  | 0.4408183  | 0.3662643  | 0.3441013   | 0.1134119  | 0.04273084 |                        |
|              | 0.8042697  | 0.05612409 | 0.0519859  | 0.08304987  | 0.6760931  | 0.1996627  |                        |
|              | 0.08101214 | 0.1041194  | 0.08818977 | 0.1013562   | 0.04831238 | 0.1606645  |                        |
|              | 0.7503952  | 0.2406173  | 0.1537437  | 0.2456829   | 0.09814848 | 1.833978   |                        |
|              | 0.04958655 | 0.08101214 | 0          | 0.3837055   | 0.0401457  | 0.1642856  | 0.75614                |
|              | 0.0211056  | 0.2343706  | 0.3215341  | 0.1230009   | 0.03948988 | 0.04132213 |                        |
|              | 0.8925997  | 0.2751449  | 0.02871382 | 0.2610368   | 0          | 0.07761875 | 0                      |
|              | 0.4890889  | 0.9680016  | 0.04521419 | 0.2600793   | 0.1882583  | 0.1626082  |                        |
|              | 0.6376184  | 0.6164449  | 0.05941246 | 0.7334989   | 0.1379548  | 0.1414538  |                        |
|              | 0.4382882  | 0.04273084 | 0.1181250  | 0.05937337  | 0.03990311 | 0.2703821  |                        |
|              | 0.03250992 | 0.3501844  | 0.2065161  | 0.04281192  | 0.4959646  | 0.4274573  | 0                      |
|              | 0.1230201  | 0          | 0.3726867  | 0.1748983   | 0.08322859 | 0          | 0.4441315 0            |
|              | 0.9813824  | 0.6472671  | 0          | 0.01316329  | 0          | 0.2015579  | 0.06157978             |
|              | 0.1103810  | 0.3135887  | 0.9365310  | 0.2941575   | 0          | 0.09781163 | 1.265099               |
|              | 0.03195734 | 0.8813235  | 2.0694040  | 0.05738282  | 0.1776526  | 0          | 0.2108587              |
|              | 0.04891995 | 0.06048762 | 0.5598857  | 0.01113342  | 0.05540737 |            |                        |
| TCGA-GC-A3OO | 481        | 0          | 0.1500692  | 0.1283850   | 0.2721204  | 0.2359797  | 1.128475               |
|              | 19.714430  | 0.3137074  | 0.1963284  | 0.3286458   | 0.3099002  | 0.05931656 |                        |



|                            |                           |                    |                   |                          |                              |
|----------------------------|---------------------------|--------------------|-------------------|--------------------------|------------------------------|
| 4.4281870.2815855          | 0.5007015                 | 0.3000584          | 0.5666459         | 0.1421023                | 0                            |
| 0.5556941                  | 0.0268233                 | 0.04925883         | 0                 | 3.27929621.6842          | 0.1105445                    |
| 0.5001321                  | 0.1381806                 | 0                  | 6.3649450.9771344 | 0.5469112                | 0.1876527                    |
| 0.3224215                  | 0.9224434                 | 1.1452370.04799958 | 1.5602310.1981645 | 0.3212466                |                              |
| 0.05583422                 | 0.1002162                 | 0.05833283         | 0.1938052         | 0.2082853                | 6.532709                     |
| 0.0952117                  | 0.08478014                | 0.02795072         | 0.2418161         | 0.1564692                | 2.685431                     |
| 0.2794723                  | 1.5034650.3184012         | 0                  | 0.2449796         | 0                        | 0.6366557 0.4433295          |
| 0.05319954                 | 0.1010918                 | 0.2010691          | 0.6126008         | 1.2925070.1640911        |                              |
| 0.3149233                  | 0.9751798                 | 0.9694677          | 0                 | 0.3216903                | 0.9220989 0.1647895          |
| 2.2215191.7963480.02837309 | 0.3852079                 | 0.7705085          | 0.1706481         | 0.08241602               |                              |
| 0                          | 0.4669552                 | 0.3423027          | 0.3524046         | 0                        | 0.2328844 0.4019985          |
| 0.1908504                  | 0.3100884                 | 0.05456363         | 0                 | 0                        | 0.1305510.02346176 0.6645158 |
| 0.4664069                  | 0.5803586                 | 0.5410123          | 3.2638750.7361666 | 0.03527236               |                              |
| 0.06159136                 | 0                         | 6.4528230.7955071  | 0.4447550.4676883 | 0.2272304                |                              |
| 0.1797515                  | 0.1357564                 | 0.4863958          | 0.2667386         | 0.3973410.03786444       |                              |
| 1.8405910                  | 0.1505647                 | 0.01062662         | 0.2021835         | 0.1324470.1609061.544175 |                              |
| 0.3722417                  | 0.08184545                | 0.07105114         | 0.1737916         | 1.4559870.03633435       |                              |
| 1.1290690.09672644         | 0.6127079                 | 0.03166639         | 8.2923130.1971875 | 0.0591106                |                              |
| 0.9262289                  | 0.2907079                 | 0.1749462          | 0.1182212         | 0.1856877                | 0.1033001                    |
| 0.4711398                  | 0.5419084                 | 0                  | 0.1311545         | 0.4099439                | 0.3661044 0.1361182          |
| 0.3704417                  | 0.1712661                 | 0.0339391          | 0.2139986         | 0                        | 0.4910727 0.05346687         |
| 0.07696136                 | 0                         | 0.8257839          | 1.4409950.2474397 | 0.1359733                | 0.7559437                    |
| 0.9672644                  | 0.4034923.1755930.6045402 | 1.7966070.1588046  | 0.2451592         |                          |                              |
| 0.07833061                 | 0.3188373                 | 0.03138616         | 0.03820434        | 0.1435273                | 0 0.3823866                  |
| 0                          | 0.2273022                 | 0.4246526          | 0.3858054         | 0.07250363               | 0.4248239 0.09642838         |
| 0.4542183                  | 0.1870753                 | 0.1146130.06497654 | 0.3619016         | 0.1514578                |                              |
| 0.3099002                  | 1.01732                   | 0.01990628         | 0.3385743         | 0.5705458                | 2.4196680.08690707           |
| 0.03897402                 | 0.3403338                 | 0.4541424          | 0.1150992         | 0.2294169                | 0.05333287                   |
| 0.1009085                  | 0                         | 0.08022551         | 0.2106912         | 0.1705797                | 0 1.0324140.5751302          |
| 0.5088652                  | 1.0077870.09806367        | 0.2434175          | 0.09462953        | 0.04447192               | 4.47205                      |
| 0                          | 0.0742751                 | 0                  | 1.6998760.1700118 | 0.1226502                | 0.2359181 0.1460857          |
| 0.04037916                 | 0.6804098                 | 0.7993833          | 0.2907079         | 0.3480886                | 0.4232875                    |
| 0.4326265                  | 0                         | 0.05233278         | 0.09683648        | 0.0837788                | 0.0220174 0                  |
| 1.6570350.1095486          | 0.03724589                | 0.1702385          | 0.09505222        | 0.06254827               |                              |
| 0.1978065                  | 0.2023684                 | 0.05353413         | 0.05196536        | 0.2718933                | 0.07640867 0                 |
| 0.4066548                  | 0.2109897                 | 0.8728049          | 9.8097540.1279249 | 0.2154312                |                              |
| 0.06314485                 | 0.2651690.0461401         | 0.02852522         | 0.4709818         | 0.01050077               |                              |
| 0.08361421                 |                           |                    |                   |                          |                              |
| TCGA-E7-A6ME               | 731 0                     | 0.1068935          | 0.1524132         | 0.1938299                | 0.3295824                    |
| 0.05468072                 | 32.008920.06207001        | 0.2201242          | 0.2926157         | 0.6131673                |                              |
| 0.1232317                  | 0.5359894                 | 0.2865311          | 0.8255716         | 0.3080792                | 0.06316413 0                 |
| 0.1504217                  | 0.1552227                 | 0.09553043         | 0                 | 0.2196738                | 3.95745533.59751             |
| 0.1558401                  | 0.09576381                | 0                  | 0.2558227         | 0.5638949                | 1.2115690.05902452           |
| 0.08910932                 | 0.0382765                 | 0.6419467          | 0.1637186         | 0.03798871               | 0.6688644                    |

|                                    |                            |                           |                           |                   |                            |                    |   |
|------------------------------------|----------------------------|---------------------------|---------------------------|-------------------|----------------------------|--------------------|---|
| 0.1357226                          | 0.1775344                  | 0.0414275                 | 0.09679116                | 0.1108004         | 0.4601547                  |                    |   |
| 0.08242249                         | 8.8303550.2825782          | 0.1341965                 | 0.05530318                | 0.1435369         |                            |                    |   |
| 0.5108225                          | 3.2862390.1421904          | 2.0594420.6299873         | 0.6648024                 | 0.7006343         |                            |                    |   |
| 0.3197784                          | 0.0508108                  | 2.1052080                 | 0.3600355                 | 0.7558856         | 0.0382765                  |                    |   |
| 0.0154212                          | 0.1757969                  | 0.2670454                 | 0.1653846                 | 0.3452732         | 0.0473968                  |                    |   |
| 0.08592685                         | 0.0849318                  | 0.2738835                 | 0.3701464                 | 3.7182890.1684166 |                            |                    |   |
| 0.0277153                          | 0.05949365                 | 0.04051723                | 0.07827263                | 0                 | 0.5015542                  | 0.474095           |   |
| 0.06436304                         | 0                          | 0.06911763                | 0.1053637                 | 0                 | 0.04601547                 | 0.6477562          | 0 |
| 0.1070445                          | 0.08265846                 | 0.0278528                 | 0.03635414                | 0.2957253         | 0.09186361                 |                    |   |
| 0.1427259                          | 0.2723822                  | 0.5462161                 | 0.004187385               | 0.2559153         | 0.1098369                  |                    |   |
| 0.3442929                          | 2.9512261.0966030          | 0.08748915                | 0.8864032                 | 0.4432016         |                            |                    |   |
| 1.8606030.1055536                  | 0.1572354                  | 0.08990211                | 4.5873720.1180490.7745576 |                   |                            |                    |   |
| 0.01261548                         | 0.1200118                  | 0.4717063                 | 0.5253070.2613084         | 0.4419095         | 0                          | 0                  |   |
| 0.1237908                          | 1.6841660.0143782          | 1.1542190.2870738         | 0.7385712                 | 0.03759299        |                            |                    |   |
| 0.4495105                          | 0.09753858                 | 0                         | 1.64241                   | 0.1380464         | 0.09440393                 | 0.04678239         |   |
| 0.1322644                          | 0.1226335                  | 1.1186342.05552           | 0.5502721                 | 0.07785052        | 0.04424254                 |                    |   |
| 0.05432794                         | 0.2154584                  | 0.5374998                 | 0                         | 0.2417463         | 0.9914150.1312337          |                    |   |
| 0.09716343                         | 0.0634736                  | 0.2284131                 | 0.04704375                | 1.2065670.4641403 |                            |                    |   |
| 0.4243054                          | 0.04035542                 | 0.1346136                 | 1.0662740.1457852         | 0.1190504         |                            |                    |   |
| 0.3349194                          | 0.2843808                  | 0.1256840.2473862         | 0.09299077                | 1.35531           | 0                          |                    |   |
| 0.4989002                          | 0.0627751                  | 0.1810341                 | 0.1134883                 | 0.1622858         | 0.06424845                 |                    |   |
| 0.7281871                          | 0.5298568                  | 0.1721465                 | 0.1833938                 | 0.2243723         | 2.356355                   |                    |   |
| 0.2776098                          | 0.04535456                 | 0.03856869                | 0                         | 0.3596084         | 0.3065836                  | 2.72048            |   |
| 0.07089568                         | 0.5580669                  | 0.5003682                 | 0.1377239                 | 0.1326502         | 0.2313415                  |                    |   |
| 0.3615003                          | 0.1155297                  | 0.1044901                 | 0.3122107                 | 0.1266290.1714702 | 0                          |                    |   |
| 1.0714530.8337456                  | 0                          | 0.4368154                 | 0.4520085                 | 0.5462161         | 0.6590215                  |                    |   |
| 1.0583560.2328341.0646440.08425512 |                            | 0.1319879                 | 0.5651065                 | 0.04784563        |                            |                    |   |
| 0.1322644                          | 0.06648024                 | 0.05957257                | 0.4709386                 | 0.1456051         | 0.0560144                  |                    |   |
| 0.2312356                          | 0                          | 0.3130045                 | 0.8334642                 | 0.2070696         | 0.05509813                 | 0                  |   |
| 0.2246982                          | 0.1958333                  | 0.09319087                | 0.2586603                 | 0.3978345         | 0                          | 0.02219903         |   |
| 1.7600920                          | 0.07369455                 | 0.2694666                 | 0.09873671                | 0.1272937         | 0.3707802                  |                    |   |
| 0.2772036                          | 0.2224370.06169107         | 0.2700814                 | 0.6349639                 | 0.1095195         |                            |                    |   |
| 0.7304970                          | 2.6150637.9895080.09345662 | 0.02841675                | 0.1499258                 | 0.3147974         |                            |                    |   |
| 0.2738778                          | 0                          | 1.2368620                 | 0.1116711                 |                   |                            |                    |   |
| TCGA-XF-AAN5                       | 2293                       | 0                         | 0.09556754                | 0.06813212        | 0                          | 0.2062630.09777401 |   |
| 71.352190.1109867                  |                            | 0.3009896                 | 0.4069513                 | 0.2192796         | 0.2833062                  |                    |   |
| 0.4823719                          | 0.4269527                  | 0.8857175                 | 0.1032887                 | 0.1355317         | 0.1508233                  |                    |   |
| 0.2390822                          | 0                          | 0.07591864                | 0.4182555                 | 0                 | 2.10920775.937040.07333051 |                    |   |
| 0.5479496                          | 1.6132710.1143585          | 0                         | 0.5992150.1055411         | 0.4780063         |                            |                    |   |
| 0.4106508                          | 2.1606740.3945673          | 0.1698180.5519950.1132526 | 0.1058158                 |                   |                            |                    |   |
| 0.2370435                          | 0.09014127                 | 0.1485908                 | 0                         | 0.07368938        | 1.2814640.3031651          |                    |   |
| 0.05998883                         | 0.0197774                  | 0.5133136                 | 0.8303602                 | 7.2269140.2542491 |                            |                    |   |
| 0.7364934                          | 0.1408092                  | 0                         | 0.8036809                 | 0                 | 0.02555276                 | 0.2091277          |   |
| 0.7905029                          | 0.1072959                  | 0.2134091                 | 0                         | 0.03676597        | 0.1954009                  | 0.0955002          |   |

|                   |                           |                   |                           |                           |                   |                   |             |   |  |
|-------------------|---------------------------|-------------------|---------------------------|---------------------------|-------------------|-------------------|-------------|---|--|
| 0.3696530.2057931 | 0.1694994                 | 0.3755764         | 0.1181177                 | 0.3964466                 |                   |                   |             |   |  |
| 0.6618548         | 0.5866441                 | 0                 | 0.3469020.1329750.2535695 | 0.06997923                | 0                 |                   |             |   |  |
| 0.04720125        | 0.1211035                 | 0.2301737         | 0                         | 0.4943540.2992230.4051264 |                   |                   |             |   |  |
| 0.08227977        | 0                         | 0                 | 0.09570253                | 0.09237545                | 0                 | 0.01300089        | 0.3712734   | 0 |  |
| 0                 | 0.1989334                 | 4.1997370.1572358 | 0                         | 0                         | 0                 | 0.7387877         | 0.3631157   |   |  |
| 0.4136593         | 0.1434019                 | 0.1467563         | 0.2161320.3154841         | 0.2516523                 | 0                 |                   |             |   |  |
| 0.2411295         | 1.0967310                 | 0                 | 0.0563940.2145919         | 0.0937170.2561716         |                   |                   |             |   |  |
| 1.8402180.3950868 | 0                         | 0                 | 0.2049528                 | 0.9509809                 | 0.0514191.0652110 |                   |             |   |  |
| 3.2115350.4705374 | 0                         | 0.05232231        | 0.1254766                 | 0.72175                   | 0.1234197         |                   |             |   |  |
| 0.1772428         | 0.0836511                 | 0.1576670         | 0                         | 1.2064460                 | 0.06960184        | 0.07910962        |             |   |  |
| 0.09714321        | 0.0963147                 | 0.6116076         | 0.09088852                | 0.2881760.9639266         |                   |                   |             |   |  |
| 0.3519864         | 0.4343422                 | 0.2269929         | 0.2450538                 | 0                         | 1.6180871.106566  |                   |             |   |  |
| 0.05836123        | 0.2164773                 | 0.1604675         | 1.46661                   | 0.2606770.1561067         | 0.5133136         |                   |             |   |  |
| 0.7627473         | 0                         | 0.2341845         | 0                         | 0.5894795                 | 0.1332495         | 0                 | 0.1122475   | 0 |  |
| 0.4058544         | 0                         | 0.1608348         | 0.8012699                 | 0.2408723                 | 0.07695331        | 0.1639622         |             |   |  |
| 0.1228156         | 0.4358662                 | 0.5956694         | 0                         | 0                         | 0.4609346         | 0.2411295         |             |   |  |
| 0.1096398         | 0.6011005                 | 0.08451187        | 0.3920217                 | 0.4037075                 | 0.1055411         |                   |             |   |  |
| 0.1317724         | 0.5791230.1140697         | 0.2065774         | 0.1149770.3325808         | 0.339636                  |                   |                   |             |   |  |
| 0.05460072        | 0                         | 0                 | 0.1490812                 | 0                         | 0.2603550.1787435 | 0.1627805         |             |   |  |
| 0.2945973         | 2.9620720.4163280.4079313 | 0.02510928        | 0.1416037                 | 0.1595465                 |                   |                   |             |   |  |
| 0.1711045         | 0                         | 0                 | 0.0599181                 | 0.2857058                 | 0.1952663         | 0.1001587         |             |   |  |
| 0.2067350         | 0.7402219                 | 0.9345168         | 0                         | 0.1970408                 | 0                 | 0.1721916         |             |   |  |
| 0.1750837         | 0.1249752                 | 0.1027795         | 0                         | 0.07010594                | 0                 | 2.0364240.0581359 |             |   |  |
| 0                 | 2.2886940.1765501         | 0.04741927        | 0.2946614                 | 0.4295762                 | 0                 | 0.05515457        |             |   |  |
| 0.2355755         | 4.7847830                 | 1.6696570         | 0.7940319                 | 1.18377                   | 0.2611075         |                   |             |   |  |
| 0.2540585         | 0                         | 0                 | 0.03917744                | 0.1211035                 | 0.6362196         | 0                 | 0.2662373   |   |  |
| TCGA-FD-A3SN      | 887                       | 0                 | 0.07143067                | 0.168050617               | 0                 | 0.264288819       | 0.285011465 |   |  |
| 20.537715639      | 0                         | 0.488013165       | 0.078215205               | 0                         | 0.028233781       | 0.816913138       |             |   |  |
| 0.306355206       | 0.688498284               | 0.077201745       | 0.217797908               | 0.101457786               | 0                 | 0.311178771       |             |   |  |
| 0.008511655       | 0.164125192               | 0.058718081       | 1.656130611               | 48.471282736              | 0.078926252       |                   |             |   |  |
| 0.030716813       | 0.328859383               | 0.051285413       | 0.180872661               | 1.343625479               | 0.189324654       |                   |             |   |  |
| 0.035727933       | 0.12277417                | 0.333086873       | 0.114160259               | 0.106619674               | 0.082516244       |                   |             |   |  |
| 0.15962401        | 0.089636009               | 0.079728716       | 0.108338797               | 0.144380808               | 0.110698022       |                   |             |   |  |
| 0.231328166       | 2.29875041                | 0.045319324       | 0.188318945               | 0.008869412               | 0.748155096       |                   |             |   |  |
| 0.670292801       | 2.071814112               | 0.152028052       | 0.770674815               | 0.176813174               | 0                 | 0.614834539       |             |   |  |
| 0                 | 0.077669517               | 0.375143296       | 0.050644345               | 0.144354427               | 0.319019496       | 0                 |             |   |  |
| 0.057708481       | 0.186689705               | 0.171312795       | 0.099465162               | 0.276871134               | 0.012669004       |                   |             |   |  |
| 0.168431684       | 0.04540397                | 0.386957308       | 0.519429179               | 0.789262519               | 0.054020635       |                   |             |   |  |
| 0.033336925       | 0.059634201               | 0.146206609       | 0.078457544               | 0.226162944               | 0.02116796        |                   |             |   |  |
| 0.325861737       | 0.232254321               | 0                 | 0.110849455               | 0.059640053               | 0.181683749       | 0                 |             |   |  |
| 0.415543343       | 0                         | 0                 | 0.149136721               | 0.022334882               | 0.020406413       | 0.438959702       |             |   |  |
| 0.220993505       | 0                         | 0.809078981       | 1.927222641               | 0.130955044               | 0.029316553       | 0                 |             |   |  |
| 0.276085015       | 1.325272578               | 0.325687106       | 0.408122926               | 0.052617501               | 0.289584299       |                   |             |   |  |
| 0.129235968       | 0.797447464               | 0.112856479       | 0.042028502               | 0                         | 2.151808284       | 0.047331164       |             |   |  |

|              |                  |                   |                  |                    |                  |             |             |   |
|--------------|------------------|-------------------|------------------|--------------------|------------------|-------------|-------------|---|
| 0.143333052  | 0                | 0                 | 0.42028502       | 0.306355206        | 0.551252896      | 0.236241842 | 0           | 0 |
| 0.180150483  | 0.758184346      | 0.092237851       | 1.030054474      | 0.092080627        | 0.883892444      |             |             |   |
| 0.060290887  | 0.576732754      | 0.500577309       | 0                | 1.138451391        | 0.332094065      | 0.075701562 |             |   |
| 0.075028659  | 0.212122911      | 0.442523403       | 0.074751801      | 0.440385608        | 0                | 0           |             |   |
| 0.03547765   | 0.043565028      | 0.172773885       | 0.901214649      | 0.122280109        | 0.064617984      |             |             |   |
| 0.660848455  | 0.052617501      | 1.285587218       | 0.101797678      | 0.402956813        | 0                | 0.423296018 |             |   |
| 0.935790521  | 0                | 0.097081811       | 0.323835954      | 0.460403136        | 0.371586703      | 0.369132517 |             |   |
| 0.19183464   | 1.026189354      | 0.100784766       | 0.081684427      | 0.099424481        | 0.55809138       |             |             |   |
| 0.119514678  | 0.072738736      | 0.079103698       | 0.026394447      | 0.200211247        | 0                | 0.092736339 |             |   |
| 0.583925929  | 0.172835305      | 0.241574388       | 0.330888642      | 0.11015627         | 0.231009293      |             |             |   |
| 0.267135006  | 0.18184684       | 0.061855689       | 0.620134836      | 0.216274783        | 0.344184869      |             |             |   |
| 1.168139647  | 0                | 0.538075355       | 0.503996863      | 0.678413344        | 0.165465771      | 0.296816674 |             |   |
| 0.221675584  | 0.216164887      | 0.109570966       | 0.22372469       | 0.101542546        | 0.111130315      | 0           |             |   |
| 0.229116735  | 0                | 0                 | 0.583796484      | 0.388600049        | 0.219002573      | 0.660578413 |             |   |
| 0.184496703  | 0.066681165      | 0.341491068       | 0.022521109      | 0.02116796         | 1.123939252      |             |             |   |
| 0.153467712  | 0.247476729      | 0                 | 0.289609519      | 0.256256339        | 0.175138945      | 0.089834758 |             |   |
| 0            | 0.038439731      | 0.250995155       | 0.800692388      | 0.221396044        | 0.176730539      | 0.036632438 |             |   |
| 0.128702274  | 0.078518364      | 0.112093232       | 0.092185383      | 0                  | 0.136239314      | 0           |             |   |
| 0.539652856  | 0.130358674      | 0.059094918       | 1.51257777       | 0.135730238        | 0.072303495      |             |             |   |
| 0.244467158  | 0.118552966      | 0                 | 0.024734723      | 0.121493605        | 1.672990929      | 0.029274188 |             |   |
| 0.47881      | 0                | 0.870449679       | 2.533725418      | 0.131148362        | 0.296232389      | 0           | 0.252432872 |   |
| 0            | 0.05431029       | 0.298906932       | 0.074973124      | 0.019899546        |                  |             |             |   |
| TCGA-ZF-A9R2 | 642              | 0                 | 0.1439923        | 0.1539827          | 0.06527529       | 0.2996787   |             |   |
| 0.0276219    | 49.793610        | 0.1962274         | 0.1642383        | 0.3716889          | 0.03557162       |             |             |   |
| 0.02868921   | 0                | 0.2001776         | 0.1361726        | 0.03828874         | 0.17043503968125 | 0           |             |   |
| 0.08579038   | 0.02954009       | 0                 | 2.31025623659930 | 0.1408717          | 0.07739997       | 0           |             |   |
| 0.06461428   | 0                | 0.3646091         | 0                | 0.1350404          | 0                | 0.3815043   | 0.129447    |   |
| 0.2302795    | 0.1559428        | 0.1005548         | 0.04650142       | 0.01674165         | 0.1038996        |             |             |   |
| 0.08395605   | 0.2324466        | 0                 | 8.50754601141953 | 0.3050515          | 0.02234907       |             |             |   |
| 0.3625375    | 0.04691662       | 3.32771301915395  | 1.10968          | 0.06364748         | 0.9594977        |             |             |   |
| 0.5475815    | 0.2307653        | 0                 | 1.0634430        | 0.06062385         | 0.6832833        | 0           | 0           |   |
| 0.1728070    | 0.05395907       | 0.501263005813813 | 0                | 0.1350404          | 0.05720427       |             |             |   |
| 0.1317638    | 2.43072830384090 | 0.1020906         | 0.01400035       | 0                  | 0.1228034        | 0           |             |   |
| 0.04070596   | 0.2933637        | 0.06842531        | 0.1950775        | 0.1101301          | 0.03491469       |             |             |   |
| 0.5385051    | 0                | 0                 | 0.1308853        | 0                  | 0.05407339       | 0.08350966  | 0.02813962  | 0 |
| 0.3623388    | 0                | 0.07209785        | 0.2984424        | 1.1864580008461011 | 0                | 0.0554840   |             |   |
| 1.1330140    | 0.3692986        | 0.1402343         | 0.1031218        | 0.36484601628239   | 0.5833746        |             |             |   |
| 0.0710937    | 0.05295153       | 0.04541395        | 0.8649554        | 0                  | 0.1203898        | 0           |             |   |
| 0.1212477    | 0.1059031        | 0.04824696        | 0.004061528      | 0.2232301          | 0.098164         |             |             |   |
| 0.04260875   | 0.09727322       | 1.776137005810504 | 0.6770929        | 0                  | 0.1921971        | 0           |             |   |
| 0            | 0.2463575        | 0.1417924         | 1.04059203486699 | 0.09060728         | 0                | 0.04454213  |             |   |
| 0.06194815   | 0.8476153        | 0.665808005053988 | 0.0393261        | 0                  | 0                | 0.1088385   |             |   |
| 0.2468340    | 0.04070596       | 0.3818693         | 0                | 0.24541            | 0                | 0.2307653   | 0.04752819  |   |
| 0.7618698    | 0.6609537        | 0                 | 0.2853969        | 0.09066657         | 0.3314628        | 0.7311721   |             |   |

|              |            |             |            |             |            |            |            |
|--------------|------------|-------------|------------|-------------|------------|------------|------------|
| 0.01603685   | 0.1933533  | 1.3886610   | 0.06348915 | 0.05880792  | 0.03131612 |            |            |
| 0.3330649    | 0.1129320  | 0.09164323  | 0.05436132 | 0.01662713  | 0.09172557 |            |            |
| 0.05465233   | 0.07789208 | 0.3961385   | 0.4990207  | 0.04347979  | 0.2316029  |            |            |
| 0.09252362   | 1.0746370  | 0.3926560   | 0.1168976  | 0           | 0.3178976  | 0          | 0.5031570  |
| 0.4295724    | 0.3020795  | 0           | 0.2978138  | 0.04674476  | 0.0214837  | 0.1556258  |            |
| 0.1218071    | 0.3489817  | 0.1279330   | 0.07119286 | 0           | 0.0721658  | 0          | 0          |
| 0.03951893   | 0.4138806  | 0.3329040   | 0.4648932  | 0.1176158   | 0.2919507  |            |            |
| 0.0567485    | 0.2133554  | 0.03380482  | 0.04833833 | 0.04454213  | 0          | 0.01128488 |            |
| 0.5437580    | 0.07355227 | 0.1131824   | 0.05840421 | 0.04843006  | 0.3264286  |            |            |
| 0.8559422    | 0          | 0.1113310   | 0.2918726  | 0.09892496  | 0.1255340  | 0.116144   |            |
| 0.1004828    | 0          | 0.3588420   | 0.7845074  | 0.06569534  | 0.01489069 | 0.06806037 |            |
| 0.2137574    | 0.04286817 | 0.2122724   | 0.5974575  | 0.2247276   | 0.03116317 |            |            |
| 0.3127938    | 0          | 0.03688243  | 0.26312    | 0           | 0.4984891  | 0.9609410  | 0.1652333  |
| 0.07950978   | 0.01106793 | 0           | 0.2225314  | 0           | 0.1629638  |            |            |
| TCGA-ZF-AA4T | 599        | 1           | 0.07066721 | 0.2456032   | 0.1922112  | 0.1960981  |            |
| 0.02711204   | 19.243770  | 0.0256807   | 0.1934481  | 0           | 0.01745751 | 0.09503881 |            |
| 0.4262075    | 0.8514245  | 0.05728246  | 0.01565916 | 0           | 0.02486093 | 0          |            |
| 0.01052585   | 0.2609534  | 0.07261312  | 3.10599    | 27.4111     | 0.1138706  | 0          | 0          |
| 0.1268432    | 0          | 0.4345673   | 0          | 0.04418259  | 0.03795686 | 0.8238170  | 0.1552926  |
| 0.1318501    | 0.3061286  | 0.1615070   | 0.07824527 | 0.05751417  | 0.07798608 |            |            |
| 0.09614073   | 0.1368936  | 0           | 5.7362160  | 0.03326896  | 0          | 1.8503971  | 0.381518   |
| 2.82429      | 0.1880040  | 0.6807480   | 0.09370895 | 0.3767147   | 0.9569657  | 0.04530113 |            |
| 0.003149155  | 2.3195860  | 0.1252576   | 0          | 1.1835370   | 0          | 0.1319245  | 0.05296306 |
| 0.08200173   | 0.1711949  | 0.007833498 | 0.1230801  | 0.03743224  | 0.2327968  |            |            |
| 0.6882288    | 6.50689    | 0.03340204  | 0.02748385 | 0           | 0.04017887 | 0          | 0.03995459 |
| 0.4188343    | 0.2014868  | 0.2233894   | 0.0540486  | 0.06854043  | 0.04916885 | 0          |            |
| 0.0456312    | 0.3211734  | 0           | 0          | 0.09221421  | 0          | 0.01081517 | 0.2121424  |
| 0.04554823   | 0          | 0.1902166   | 0.6499856  | 0.008304832 | 0.03625402 | 0          | 0          |
| 0.3511896    | 0.7249638  | 0           | 0.1301378  | 0.3743893   | 0.3595913  | 0.3817376  |            |
| 0.06978141   | 0          | 0.04457567  | 2.6610120  | 0.05853161  | 0.4135865  | 0          | 0.05950482 |
| 0.05197412   | 0.1894255  | 0.6258895   | 0.3651826  | 0           | 0.04182225 | 0.1682226  |            |
| 1.9924020    | 0.02851625 | 1.3107280   | 0.1138706  | 0.5714966   | 0.03727906 | 0          |            |
| 0.1644309    | 0          | 0.8557546   | 0.2737872  | 0.09361557  | 0.09278343 | 0.1748798  |            |
| 0.06080468   | 0.09244106 | 0.6068382   | 0.2480349  | 0.6176031   | 0          | 0          |            |
| 0.3204886    | 0.2907334  | 0.1008110   | 0.07990918 | 0.8663884   | 0.0650689  |            |            |
| 0.3372321    | 0.06294354 | 0.6342159   | 0          | 0.7478068   | 0.1797222  | 0          |            |
| 0.04001841   | 0.4894615  | 0.8946974   | 0.1135890  | 0.03148166  | 0.3795686  |            |            |
| 0.3760079    | 0          | 0.1154448   | 0.03073807 | 0.4358893   | 0          | 0.2248791  |            |
| 0.05335789   | 0.01632021 | 0.09003244  | 0          | 0.1146815   | 0.3888264  | 0.7569782  |            |
| 0.08535444   | 0.1363967  | 0.1362236   | 0.4541505  | 0.1101166   | 0.04497581 |            |            |
| 0.03824661   | 0          | 0.1337270   | 0.1790277  | 0.04686909  | 0.3788199  | 0.2420437  |            |
| 0.01951054   | 0.1461583  | 0.1835277   | 0.1897843  | 0.2291298   | 0.207235   |            |            |
| 0.5072226    | 0.06278578 | 0.1304403   | 0.0441048  | 0.7083372   | 0          | 0          |            |
| 0.4331676    | 0.09266371 | 0.3159652   | 0.6535181  | 0.3194184   | 0.06596847 |            |            |

|              |             |             |            |            |             |                       |
|--------------|-------------|-------------|------------|------------|-------------|-----------------------|
| 0.3468905    | 0.1114020   | 0.06636166  | 0.04744607 | 0.08743989 | 0           | 0.02215316            |
| 0.4336483    | 0.0360973   | 0           | 0.1719784  | 0.09507221 | 0.6207813   | 0.5755523             |
| 0            | 0.1092760   | 0.06366335  | 0.09709894 | 0.1617221  | 0.05700006  | 0                     |
| 0.4512797    | 1.7453930   | 0.03224135  | 0.02923165 | 0.2004122  | 0.09791217  |                       |
| 0.06837494   | 0.2737202   | 0.4214961   | 0.09453407 | 0          | 0.4899256   | 0                     |
| 0.07240326   | 0.9448652   | 0           | 0.8807178  | 2.96918    | 0.08688391  | 0.02817945            |
| 0.07433688   | 0           | 0.1955453   | 0.06716227 | 0.08400915 | 0.006180984 | 0.03691286            |
| TCGA-E7-A4IJ | 674 1       | 0.3659271   | 0.2152237  | 0          | 0.2369336   | 0 27.147180           |
| 0.07978749   | 0.2671221   | 0           | 0.05423882 | 0.1202978  | 0.3923514   | 0.6782806             |
| 0.06921099   | 0.1556849   | 0.04331258  | 0.2832152  | 0.3586760  | 0.1417122   |                       |
| 0.03002805   | 0.3760034   | 3.08436641  | 1.1135     | 0.1263518  | 0.09834812  | 0.4211726             |
| 0            | 0           | 1.9325810   | 0.04575703 | 0.07861889 | 0.2326837   | 0.2119985             |
| 0.09753471   | 0           | 0.09292347  | 0.06077514 | 0.06807277 | 0.07041059  | 0.04267144            |
| 0.3308008    | 0.04232338  | 17.874450   | 0.3482447  | 0.2411815  | 0.04543649  |                       |
| 0.8844625    | 0.4292244   | 2.3120160   | 0.04867586 | 0.3290030  | 0.04852413  | 0                     |
| 0.6380842    | 0.6568160   | 0.01956825  | 1.8617390  | 0          | 0.2042853   | 0 0.03167472          |
| 0.1903       | 0.1097008   | 0.1273858   | 0.1772954  | 0.04056322 | 0.08824569  |                       |
| 0.009691533  | 0.08036417  | 0.1425507   | 9.1534850  | 0.06918462 | 0.07115807  |                       |
| 0.007637396  | 0.1456372   | 0           | 0          | 0.3253195  | 0.06955559  | 0.1982999             |
| 0.2238985    | 0.2129486   | 0.07638145  | 0.4653674  | 0          | 0.2660947   | 0 0                   |
| 0.04244455   | 0.02860445  | 0.007467041 | 0.5169461  | 0          | 0           | 0.5594656             |
| 1.9633470    | 0.004300387 | 0           | 0          | 0.04419801 | 1.3941991   | 0.5433060 0.1123127   |
| 0.3371570    | 0.1241351   | 0.8895166   | 0.1084021  | 0          | 0.04616412  | 3.740064              |
| 0.1212347    | 0.6118923   | 0.006477961 | 0.1232505  | 0.3767835  | 0.09808784  |                       |
| 0.03302894   | 0.4538350   | 0.08662515  | 0.1600915  | 2.3971860  | 0.05906485  |                       |
| 1.4721490    | 1.2067090   | 0.07721498  | 0.2769847  | 0.09015371 | 0           | 1.701027              |
| 0.2126576    | 0.07756124  | 0           | 0.09055579 | 0.1889143  | 0.6701462   | 1.208582              |
| 0.1027494    | 0           | 0           | 0          | 0.3319092  | 1.3549210   | 0.3132101 0 0.2545424 |
| 0.1347752    | 0.3991420   | 0.5160697   | 0          | 0.6195638  | 0.5175228   | 0.2346378             |
| 0.1243334    | 0.09216424  | 0.2527036   | 0.4277697  | 0.09781049 | 0.1474104   |                       |
| 0.1460276    | 0           | 0.05977934  | 0.1591671  | 0.7398307  | 0.1147975   | 0.04657852            |
| 0.02762964   | 0.2704285   | 0.09324073  | 0.0555551  | 0.1979468  | 0.5752602   |                       |
| 0.1567906    | 0.4419801   | 0.09417145  | 0.2351299  | 1.6537550  | 0.05702029  |                       |
| 0.04657852   | 0.1188285   | 0.5294741   | 0.1846565  | 0.3148572  | 0.7672026   | 0                     |
| 0.7198203    | 0.3196029   | 0.1010289   | 0.06054664 | 0.7602706  | 0.3494173   |                       |
| 0.3954914    | 0.1155645   | 0.1227968   | 0          | 0.1905713  | 0           | 0.9781049             |
| 0.3424981    | 0           | 0.1495345   | 0.1562233  | 0.04674637 | 0.7896071   | 0.7088588             |
| 0.3415962    | 0.2030554   | 0.02884295  | 0          | 0.4734488  | 0           | 0.8150021 0           |
| 0.04588516   | 0.5613766   | 0.03738362  | 0          | 0.1781069  | 0.04923004  | 0.207388              |
| 0.7514336    | 0.07088588  | 0.02829251  | 0.04691543 | 0.1318640  | 0.1196322   |                       |
| 0.2361250    | 0.1021427   | 0           | 0.2963752  | 1.1696170  | 0.1335610   | 0.04540998 0.06918462 |
| 0.1014012    | 0.07081147  | 0.1480835   | 0.2846843  | 0.5221481  | 0.03167794  |                       |
| 0.3856118    | 0.09315703  | 0.07498333  | 0.7306397  | 0          | 1.4694986   | 1.19069               |
| 0.07798267   | 0           | 0.2309576   | 0.2424695  | 0.07875526 | 0           | 0.8874285             |

|              |            |             |            |                 |            |            |            |
|--------------|------------|-------------|------------|-----------------|------------|------------|------------|
| 0.08321614   | 0.3185687  |             |            |                 |            |            |            |
| TCGA-FD-A6TE | 376        | 0           | 0.1283152  | 0.1943920       | 0.07755792 | 0.3758498  | 0          |
| 42.635020    | 0.1243471  | 0.4293135   | 0.4416284  | 0.07396378      | 0.0937408  |            |            |
| 0.6592423    | 0.4360479  | 0.09245472  | 0.01895559 | 0.02531315      | 0          | 0.09316482 |            |
| 0.1401582    | 0.03509855 | 0.04394949  | 4.24310424 | 5.16520.2806061 | 0.3333697  |            |            |
| 0.2461457    | 0.3454764  | 0           | 0.8200168  | 0.2125594       | 0.2406758  | 0.0229736  |            |
| 1.6771760    | 5.084098   | 0.2622099   | 0.4632151  | 0.3855812       | 0.0749841  |            |            |
| 0.03481076   | 0.06535592 | 0.1330050   | 5.247521   | 0.02473503      | 3.1031810  | 6.105734   |            |
| 0.2214984    | 0.03319303 | 0.4738304   | 3.065962   | 6.3252960       | 3.129237   | 0.9888635  |            |
| 0.02835893   | 0.2280086  | 0.5316025   | 0          | 0.007624173     | 0.8072667  | 0          |            |
| 0.07203123   | 0.4059272  | 0           | 0          | 0.0884032       | 0.2885056  | 0.8933759  | 0          |
| 0.009482535  | 0.2234847  | 0.2548808   | 0.3209425  | 0.2777028       | 4.824455   |            |            |
| 0.4043353    | 0.04990425 | 0           | 0.2431848  | 0               | 0.0725482  | 1.0773820  | 6.09755    |
| 0.3090461    | 0          | 0.3941025   | 0.08927914 | 0.2039808       | 0.6904633  | 0.6998111  |            |
| 0            | 0          | 0.1984468   | 0.01671728 | 0.002181979     | 0.4796132  | 0.08270495 | 0          |
| 0.4213745    | 0.8359906  | 0.002513273 | 0.04388589 | 0.09888635      | 0          | 2.656993   |            |
| 0.6094282    | 0.08331085 | 0.2362999   | 0.2758623  | 0.09673093      | 2.012049   |            |            |
| 0.4012380    | 0.1618782  | 8.147010    | 0.03542657 | 1.0728240       | 0.03785911 | 0.2160937  |            |
| 0.1887457    | 0.6019169  | 0.07721234  | 1.2377610  | 0.2025052       | 0.1926282  | 1.19015    |            |
| 0.08629809   | 0.4245968  | 0.1378416   | 1.0444210  | 0.02256335      | 0          | 0.07610558 | 0          |
| 0.7518632    | 0.0828556  | 0.3513003   | 0.1123154  | 0.2116939       | 0.2576165  |            |            |
| 1.0630591    | 5.821820   | 0           | 0          | 0               | 0.4202846  | 1.1144640  | 1.220328   |
| 0.3570290    | 3.150665   | 0.4082231   | 0.1142908  | 0.2741876       | 0.02823571 |            |            |
| 0.8599669    | 1.2310470  | 0.05876967  | 0.1695495  | 0.4578397       | 2.5599150  | 3.250016   |            |
| 0.1095631    | 1.2348310  | 5.973997    | 0.1885892  | 0.3231655       | 0          | 0.4250504  |            |
| 0.06709104   | 0.1361093  | 0.0215301   | 0.06914529 | 0.1362316       | 0.1298722  |            |            |
| 0.2005223    | 0.5379184  | 0.1886563   | 0.3099674  | 0.1651097       | 0.1841386  |            |            |
| 1.86207      | 0.1999460  | 1.361093    | 0.09259587 | 0.2062935       | 0.3507357  | 0.03680236 |            |
| 1.0798380    | 0.8114619  | 1.0035130   | 0.03542657 | 0.1150020       | 1.110811   | 0.7530235  |            |
| 0.3004778    | 0.1977937  | 0.5143234   | 0.3800144  | 0.1466209       | 0          | 0.3143983  |            |
| 0.2001660    | 0.2621771  | 0.07564983  | 0.3551594  | 0.1648106       | 2.623761   |            |            |
| 0.1896569    | 0.5385863  | 0.1432817   | 0.06337544 | 0.0290086       | 0.08615099 |            |            |
| 0.2116939    | 0.03990151 | 0.008938879 | 0.4845563  | 0.1310885       | 0.0336199  |            |            |
| 0.03469697   | 0.1150860  | 9.756892    | 1.7170160  | 0.04960493      | 0.1096750  | 2.119292   |            |
| 0.1175393    | 0.1864442  | 0.1379984   | 0.1790855  | 0.01568813      | 0          | 3.821714   |            |
| 0.07805701   | 0.1415409  | 0.2021677   | 0.2116496  | 0.09550225      | 0.2967236  |            |            |
| 0.8651652    | 0.1716518  | 0.05554056  | 0.5811991  | 0.05444371      | 0.1314674  |            |            |
| 2.2456010    | 0.04295347 | 0.9772753   | 5.9963960  | 1.402319        | 0.03411153 | 0          |            |
| 0.4723543    | 0.01315054 | 0.04065033  | 0.2745738  | 0.05237504      | 0.156392   |            |            |
| TCGA-H4-A2HO | 46         | 0           | 0.06179863 | 0.1652158       | 0          | 0.1714882  | 0.02370954 |
| 74.776950    | 0.03368675 | 0.5075123   | 0.2126953  | 0.1221330       | 4.432621   |            |            |
| 0.2898928    | 0.8018474  | 0.1085362   | 0.01643277 | 0.1462946       | 0.2536442  |            |            |
| 0.5720883    | 0.05522928 | 0.07606811  | 0.2540013  | 1.58502946      | 6.75110    | 0.02133859 |            |
| 0            | 0.1422572  | 0.05546232  | 0          | 0.5812224       | 0          | 0.1159133  | 0.06638671 |

|              |            |            |            |            |            |            |
|--------------|------------|------------|------------|------------|------------|------------|
| 0.4912021    | 0.9753179  | 0.03294378 | 0.2677102  | 0.1804710  | 0.3079155  |            |
| 0.05748144   | 0.03497384 | 0.02402151 | 0.3990458  | 0.1072151  | 26.302460  |            |
| 0.2327502    | 0.01918355 | 0.8713256  | 0.4429849  | 10.586930  | 0.2055123  |            |
| 0.9128173    | 0.2458461  | 0          | 0.7795488  | 0.07923188 | 0.04681703 | 1.064954   |
| 0.05476904   | 0          | 0.1380007  | 0          | 0.03120425 | 0.1030074  | 0.3242142  |
| 1.1832260    | 0.3992276  | 0.04110247 | 0.1573109  | 0.09002009 | 0.2262015  |            |
| 0.4012384    | 5.7851280  | 0.05842031 | 0.6729712  | 0.01289821 | 0.3513651  |            |
| 0.08484746   | 0.03494038 | 0.5265153  | 0.1174671  | 0          | 0.07089843 | 0.02996938 |
| 0.2526148    | 0          | 0.07980916 | 0.4493870  | 0          | 0.04480085 | 0.04830786 |
| 0.0220684    | 0.3055608  | 0.1991601  | 0          | 0.3393435  | 0.4026264  | 0.01089389 |
| 0.03170422   | 0          | 0.1866066  | 2.1498130  | 0.5283187  | 0.08024767 | 0.1580636  |
| 0.1565846    | 0.1747019  | 0.3755591  | 0.0610240  | 0.1169446  | 1.263262   |            |
| 0.1023720    | 0.2583445  | 0.03829046 | 0.05203709 | 0.1363545  | 0.1656530  | 0.1603676  |
| 0.1916118    | 0.08426006 | 0.0731473  | 0.2067506  | 1.39645    | 0.0997501  |            |
| 0.5650453    | 0.09958007 | 1.2518640  | 0.06520124 | 0.5847228  | 0.3045074  |            |
| 0.06085449   | 0.3621093  | 1.1372810  | 0.1187072  | 0          | 0.1529327  | 0.1595215  |
| 0.4850395    | 0.9661122  | 0.08676283 | 0          | 0          | 0.0942263  | 0.2335567  |
| 0.5932430    | 0          | 0.2310590  | 0.1138058  | 0          | 0          | 0.1584638  |
| 0.8778382    | 0.4907880  | 0.06999238 | 0.6225965  | 0.2133859  | 0.3115469  | 0.4817886  |
| 0.2489502    | 0.7398444  | 0.05449656 | 0.06309797 | 0.2956856  | 0.6141332  |            |
| 0.09693635   | 0.03933145 | 0.03888466 | 0.02854412 | 0.1377837  | 0          | 0.1337189  |
| 0.6314834    | 0.1557598  | 0.1866066  | 0.1987987  | 0.2541395  | 0.3651269  | 0          |
| 0.1966572    | 0          | 0.2235471  | 0.2728707  | 0.05317382 | 0.4156940  | 0.02049356 |
| 0.2707845    | 0.8572545  | 0.2047441  | 0.1150342  | 0          | 0.3134928  | 0.133583   |
| 0.01394058   | 0.2477064  | 0.2196252  | 0.06722002 | 0.03856975 | 0.2064808  |            |
| 0.2892094    | 0.04390304 | 0.2525374  | 0.3316766  | 0.07894636 | 0.8572545  |            |
| 0.4788550    | 0.1586463  | 0.7781754  | 0.1339543  | 0.1144598  | 1.9408950  |            |
| 0.07646637   | 0.05765162 | 0.08072076 | 0.3281767  | 0.09470151 | 0.1457269  |            |
| 0.1002637    | 0.3325634  | 0.2714373  | 0.2719369  | 0.1197137  | 0.09556212 |            |
| 0.03961594   | 0.0835106  | 0          | 0.1481609  | 0.04984668 | 0.2587514  | 0.02266696 |
| 0.2406372    | 0.5387119  | 0.02819513 | 0.1661604  | 0          | 0.1712488  | 0.1287872  |
| 0.5787726    | 0.5609119  | 0.2204540  | 0.2913399  | 0.03933145 | 0.09497521 |            |
| 0.3525490    | 0.1241225  | 1.4548036  | 0.4979110  | 0.08611086 | 0.09857195 | 0          |
| 0.0855024    | 0.05873355 | 0.4554903  | 0.3135065  | 0.07532088 |            |            |
| TCGA-FD-A6TB | 572        | 0          | 0.1561705  | 0.3188294  | 0          | 0.3808364  |
|              | 0.4575409  |            |            |            |            |            |
| 30.947140    | 0.2473194  | 0.2373303  | 0.5441027  | 0.2931815  | 0.1683495  |            |
| 2.4722770    | 0.4186197  | 0.8157984  | 0.0767218  | 0.3523505  | 0.3360901  |            |
| 0.3995726    | 0.3710931  | 0.03383496 | 0.2330069  | 0          | 2.40939936 | 0.18845    |
| 0.09804448   | 0.4426249  | 0.3268149  | 0.1528997  | 4.0443351  | 0.0476750  | 0.4703692  |
| 0.2485407    | 0.1830164  | 0.4513856  | 0.3460242  | 0.1210935  | 0.2870114  |            |
| 0.2235264    | 0.3720348  | 0.05942479 | 0.1462319  | 0.1434832  | 0.07333989 |            |
| 0.06568287   | 0.4691301  | 0.1351127  | 0.1336773  | 0.2908710  | 0.2859631  |            |
| 0.7401397    | 4.1961320  | 0.3021658  | 1.0211780  | 0.3388769  | 0          | 0.2844367  |
| 0.3834026    | 0.6058180  | 0.1006590  | 0.0956380  | 0.03170362 | 0.1220109  | 0.2478327  |



|              |            |            |            |            |            |            |
|--------------|------------|------------|------------|------------|------------|------------|
| 0.1741702    | 0.3404956  | 0.5271831  | 3.298910   | 0.08813171 | 0.1826014  | 0.4060953  |
| 0.5820242    | 0.8111714  | 2.6145190  | 2.147392   | 0.3202535  | 0.2666856  |            |
| 0.1775860    | 2.806912   | 0.06421627 | 0.3155454  | 0.1619180  | 3.3590385  | 0.5863631  |
| 0.1101603    | 0.2518945  | 0.7222170  | 0.03666994 | 0.36134    | 0.1407818  | 0          |
| 0.06587092   | 0.06658809 | 0.3157816  | 0.2707639  | 1.2079080  | 0.3412169  |            |
| 1.6600711    | 5.5670160  | 0.06673893 | 0.1456715  | 0          | 3.086647   | 1.6933290  |
| 0.2581       | 0.4648035  | 0.5624869  | 0.1284325  | 1.0097860  | 0.1401936  | 0.2506033  |
| 0.1791085    | 2.2097120  | 0.04703692 | 0.2848840  | 0.09550667 | 0.0478190  | 0.1670689  |
| 0.3425071    | 4.864980   | 0.4108531  | 0.15486    | 0.1680451  | 0.27768    | 1.77772    |
| 0.04583221   | 1.1571710  | 0.09150818 | 1.4134620  | 0.2097062  | 3.1881320  | 0.09327475 |
| 0.05592167   | 0.5656869  | 0.1100098  | 0.1617465  | 0.1118433  | 0.1756702  | 0.1954544  |
| 0.6314402    | 0.8127745  | 0.03986495 | 0.1550986  | 0.2115426  | 0.04329419 |            |
| 0.5580243    | 2.1027410  | 0.08101328 | 0.06421627 | 0.2370190  | 0.3484350  | 0.05058241 |
| 0.4732611    | 0          | 1.2619931  | 0.04622    | 0.07803023 | 0.09647827 | 0.6078874  |
| 0.7843558    | 0.1701162  | 1.0688890  | 0.4194125  | 1.1331220  | 0.1502373  | 0.440673   |
| 0.09880638   | 0.3405573  | 0.2078504  | 0.4698625  | 0.1929565  | 0.03934554 |            |
| 0.9405693    | 0          | 0.3071994  | 0.5356576  | 0.2862680  | 0.4801451  | 1.132642   |
| 0.2371881    | 0.6121951  | 0.9734057  | 0.2168596  | 0.09220672 | 2.259692   |            |
| 0.1791085    | 0.1465908  | 0.5605947  | 0.07532947 | 0.4526677  | 0.4133341  |            |
| 1.2543180    | 0.1761826  | 0.1106143  | 0.9320278  | 0.2148210  | 0.1601320  | 0.1958655  |
| 0.05045564   | 0.2040322  | 0          | 0.2276924  | 0.1328832  | 0.2420657  | 0.1160334  |
| 0.7654413    | 0.2901881  | 0.2625887  | 1.7601570  | 0.09277327 | 1.0908260  | 0.1342866  |
| 0.1893273    | 1.4102630  | 0.4575409  | 0.2108042  | 0.05297842 | 1.1185980  | 0.3149782  |
| 0.1450418    | 0.08927627 | 0.1382046  | 0.1146023  | 0.5551935  | 0.9886152  |            |
| 0.2200197    | 0.08781592 | 0.2184282  | 0.05116086 | 0.1560605  | 0.1299624  |            |
| 0.2519338    | 0.07925905 | 0.05207398 | 0.1326788  | 1.6088940  | 0.07772896 |            |
| 0.08221855   | 0.8589568  | 0.1461270  | 0.1141211  | 0.4005348  | 0.3681748  |            |
| 0.07596906   | 0.1229048  | 0.4672047  | 0.1445731  | 0          | 1.2705760  | 0.5132753  |
| 0.8257183    | 6.2110020  | 0.09309503 | 0.4076180  | 0.2986914  | 0.4390112  | 0.1658735  |
| 0.08095898   | 0.6346040  | 0.06457276 | 0.1779825  |            |            |            |
| TCGA-XF-AAN3 | 2625       | 0          | 0.1393271  | 0.09932924 | 0.06316044 | 0.2845997  |
| 0.3563598    | 48.239070  | 0.06067747 | 0.1814311  | 0.1059448  | 0.1198822  |            |
| 0.09178437   | 0.9496134  | 0.6535732  | 0.5487940  | 0.2572472  | 0.1903867  |            |
| 0.05497102   | 0          | 0.6196062  | 0.06571693 | 0.09527674 | 0.04772122 | 1.549305   |
| 62.9103      | 0.2111432  | 0.4181486  | 0.2939968  | 0.1667222  | 1.1024880  | 0.8399909  |
| 0.3077350    | 2.032571   | 0.08730814 | 0.8244215  | 0.2180331  | 0.08665169 |            |
| 0.5029681    | 0.3213747  | 0.1028453  | 0.02699872 | 0.07293599 | 0.08123596 |            |
| 0.23991      | 0.1880045  | 10.4421    | 0.09207954 | 0.05466076 | 0.08649994 | 0.7249694  |
| 0.5447588    | 5.9499190  | 0.1081114  | 1.4614620  | 0.2566057  | 0          | 0.4695334  |
| 0            | 0.07191927 | 0.5907158  | 0.02057978 | 0.07821293 | 0.3629819  | 0.06236296 |
| 0.1842528    | 0.1548225  | 0.2262470  | 0.2290384  | 0.1500120  | 0.03603713 | 0.1835536  |
| 0.2060284    | 0.3867341  | 0.8593753  | 1.1759870  | 0.1536623  | 0.1761078  |            |
| 0.04361919   | 0.1980412  | 0.1339040  | 0.07877426 | 0.3440715  | 0.3531114  |            |
| 0.3250818    | 0          | 0.2477456  | 0.07068618 | 0.07382879 | 0.08996624 | 0.1899672  |

|              |             |            |            |            |            |            |
|--------------|-------------|------------|------------|------------|------------|------------|
| 0.1151316    | 0           | 0.3366835  | 0.01815195 | 0.03080007 | 0.5535781  | 0.134704   |
| 0.09301594   | 0.6850552   | 7.321040   | 0.1091584  | 0.02382608 | 0.01789546 | 0.7713034  |
| 0.6539368    | 0.8470133   | 0.3618422  | 0.1211623  | 0.3476765  | 0.1444195  |            |
| 0.7160456    | 0.3439517   | 0.08539326 | 0.2197129  | 1.20335    | 0.05770031 |            |
| 0.6989358    | 0.002055408 | 0.2737452  | 0.1878652  | 0.2178577  | 0.569841   |            |
| 0.6959924    | 0           | 0.08245653 | 0.2435211  | 1.2612640  | 0.1311858  | 0.3761079  |
| 2.1368330    | 0.02449973  | 1.3182780  | 0.1303121  | 0.04573284 | 0.4898327  | 0.4723227  |
| 0.2076435    | 0.03048856  | 0.2154950  | 0.1198822  | 0.3037605  | 0.7413833  | 0          |
| 0.1395239    | 0.1297499   | 0          | 0.2808328  | 0.7005881  | 0.2153216  | 0.2757099  |
| 0.3876691    | 0.2565790   | 0.3957649  | 0.2275151  | 0.3721479  | 0.07664721 |            |
| 0.8109046    | 0.6193739   | 0.05317772 | 0.1052001  | 0.6725895  | 1.042352   |            |
| 0.2222548    | 0.5224147   | 0.5768574  | 0.7104463  | 0.02047739 | 0.1991591  |            |
| 0.04040202   | 0.5092724   | 0.04856584 | 0.2216852  | 0.1198113  | 0.0643537  |            |
| 0.6952377    | 0.05288165  | 0.1507369  | 0.4015566  | 0.2019203  | 0.2103555  |            |
| 0.5677180    | 0.2193386   | 0.5632360  | 0.1990132  | 0.2216852  | 0.1382458  | 0.7279921  |
| 0.8349091    | 0.3596466   | 0.4442554  | 0.02310171 | 0.5195683  | 0.4990844  |            |
| 0.3590241    | 0.3361924   | 0.3015352  | 0.2840979  | 0.1003892  | 0.1388136  |            |
| 0.3030417    | 0.1031568   | 0.1706849  | 0.0144928  | 0.2172418  | 0.05433604 |            |
| 0.04949044   | 0.09489234  | 0.5048905  | 0.4004713  | 0.4652819  | 0.884668   |            |
| 0.08670874   | 0.7186195   | 0.1235473  | 0.1806375  | 0.4639914  | 0.5300852  |            |
| 0.2011287    | 0           | 0.5119921  | 0.2027834  | 0.1067539  | 0.1095154  | 0.03767465 |
| 0.2030642    | 0.6382856   | 0.4185869  | 0.06747468 | 0.1974940  | 0.01488591 |            |
| 0.1568979    | 0.1914398   | 0.1265280  | 0.09365086 | 0.06481819 | 1.7417750  |            |
| 2.1423210    | 0.04237792  | 0.09125222 | 1.0975880  | 0.1424842  | 0.08641519 | 0.5302682  |
| 0.4697067    | 0.03106381  | 0.03015352 | 0.4808209  | 0.2364642  | 0.1308541  |            |
| 0.8817687    | 0.1049394   | 0.8521314  | 6.8345940  | 0.2226898  | 0.2314935  |            |
| 0.0732811    | 0.2820904   | 0.02855823 | 0.08827786 | 0.6790912  | 0.4671452  |            |
| 0.1940725    |             |            |            |            |            |            |
| TCGA-XF-AAMH | 344         | 1          | 0.01466359 | 0.01568097 | 0.1063579  | 0.05425431 |
| 0.02250321   | 74.476450   | 0.05108837 | 0.1492063  | 0.1338029  | 0          | 0.02897974 |
| 1.1481850    | 0.1179185   | 1.1143940  | 0.02377245 | 0.2235523  | 0.0347128  | 0.1650781  |
| 0.03194004   | 0.03494616  | 0.0721978  | 0          | 1.52757977 | 0.118940   | 0.06750963 |
| 0.09458514   | 0.2025289   | 0          | 0.09282574 | 1.8459060  | 0.1943268  | 0          |
| 0.2486453    | 0.1347529   | 0.04690143 | 0.6775712  | 0.1340521  | 0.08118024 |            |
| 0.08865482   | 0.04481243  | 0.01139965 | 0.07574851 | 0.13568    | 10.807290  |            |
| 0.1380675    | 0.04551875  | 0.7088511  | 0          | 10.2286    | 0.1170336  | 0.2260105  |
| 0.09074237   | 0.07816904  | 0.5657950  | 0.0376003  | 0.02483132 | 1.6364830  | 0          |
| 0.1964690    | 0.03150449  | 0.01692377 | 0.07430249 | 0          | 0.4083725  | 0.04736439 |
| 0.006501866  | 0.04714958  | 0.01553453 | 0.07514237 | 0.03808236 | 0.1350193  | 0          |
| 0.2851476    | 0.01224196  | 0.1000463  | 0          | 0          | 0.4345447  | 0.3344713  |
| 0.2913664    | 0           | 0.6826692  | 0.0918237  | 0.0932420  | 0          | 0          |
| 0.04584998   | 0.02094557  | 0.06732467 | 0.1512216  | 0.05873719 | 0.06946777 |            |
| 0.5170143    | 0.05169808  | 0.1203645  | 0.0452021  | 0.03542243 | 1.99185    |            |
| 0.6351549    | 0.03808236  | 0.2160308  | 0.5944708  | 0          | 0.3432490  | 0.2588336  |

|              |             |            |            |             |            |            |                  |
|--------------|-------------|------------|------------|-------------|------------|------------|------------------|
| 0            | 5.4795830   | 0.3923201  | 0.06749277 | 0           | 0.3019725  | 0.1965309  |                  |
| 0.09595735   | 0.1212418   | 0          | 0          | 0.007547356 | 1.2646010  | 0.01183436 | 0.8274283        |
| 0            | 0.1473699   | 0          | 0.1479926  | 0.03211269  | 0          | 0.8363011  | 0.2272455        |
| 0.1126674    | 0           | 0.1088637  | 0          | 0.4603609   | 1.4077230  | 0.06407694 | 0                |
| 0.1773387    | 1.8098330   | 0.04183695 | 0          | 0.07650098  | 0          | 0.3998647  | 0.05224363       |
| 0.3384027    | 0           | 0.6827541  | 0.5057257  | 0           | 0          | 0.3323920  | 0.6075867        |
| 0.05999619   | 0.1633126   | 0          | 0.2340672  | 0.0517238   | 0.02395503 | 0.02551284 |                  |
| 0.7436827    | 0.1226724   | 0.07466056 | 0.04428747 | 0.02709181  | 0.01868191 | 0          |                  |
| 0.02115256   | 0.1383124   | 0.5395971  | 0.03542243 | 0.03773678  | 0.01884445 |            |                  |
| 0.8876529    | 0.2284941   | 0          | 0.03174499 | 0.2121731   | 0          | 0          | 0.7788395        |
| 0.1968565    | 0.2611677   | 0.1619390  | 0.0242625  | 0.07616471  | 0.8926273  |            |                  |
| 0.09508978   | 0.006615643 | 0.1257529  | 0          | 0.07926654  | 0          | 0.07839007 |                  |
| 0.1372473    | 0           | 0.05992209 | 0.2200030  | 0.1123944   | 0.4068189  | 0.302994   |                  |
| 0.1231973    | 0.2879219   | 0.05779034 | 0.1303634  | 1.2331960   | 0.03938062 | 0          | 0                |
| 0.009193647  | 0.08998288  | 0.02996105 | 0.09220827 | 0.2379058   | 0.118366   |            |                  |
| 0.04986323   | 0.1720672   | 0          | 0          | 0           | 0.3170465  | 0.1611858  | 0                |
| 0            | 0.2151367   | 0.3745657  | 0.08521707 | 0           | 0          | 0.1108958  | 0.06965818       |
| 0.02182759   | 0.0610361   | 0.2129492  | 0.1830827  | 0.02538824  | 0.1789225  |            |                  |
| 0.1866514    | 0           | 2.2638560  | 0.08835538 | 0.8934478   | 0.8792737  | 0.02403811 |                  |
| 0.1871133    | 0           | 0.06477559 | 2.0468360  | 0.5020434   | 0          | 0.05106328 |                  |
| TCGA-FD-A3B8 | 384         | 0          | 0.1067250  | 0.08876759  | 0          | 0.1755002  | 4.24017620.87833 |
| 0.08262957   | 0.1723743   | 0.2164108  | 0.9795214  | 0.01171785  | 4.014175   |            |                  |
| 0.1589331    | 0.1758444   | 0.1153476  | 1.5408780  | 0.1122879   | 0.07231112 |            |                  |
| 2.0663740    | 0.04945623  | 0.07784776 | 0.09747894 | 0.6886829   | 12.846360  | 0.1091891  |                  |
| 0.4589418    | 0.3275672   | 0.04256992 | 9.7587730  | 0.2402160   | 0.4321642  | 0.08896887 |                  |
| 0.8152784    | 0.42729     | 1.1560690  | 0.1264295  | 0.3767134   | 0.1385199  | 0.4114058  |                  |
| 0.1489040    | 0.2080414   | 0.1290634  | 0          | 0.3566012   | 0.4429514  | 0          | 0.0669925        |
| 0.09570776   | 0.04777022  | 0.2163712  | 0.1873730  | 0.3154806   | 1.5840330  | 0.4927123  |                  |
| 0.06321473   | 0.08799119  | 0          | 0.8518532  | 0.2724672   | 0.1261134  | 0          | 0                |
| 0.4331166    | 1.0486990   | 0.1043631  | 0          | 0.3027271   | 4.0601420  | 0.03680607 |                  |
| 0.2033574    | 0.9296366   | 0.1909822  | 1.5706430  | 0.7643235   | 0.2914620  | 0.2674923  |                  |
| 0.6335988    | 0.09439119  | 0.1302488  | 0          | 0.08785328  | 0.04508074 | 0.2998874  |                  |
| 0.2176714    | 0.06900869  | 0.2557746  | 0          | 0.1531431   | 0.1293471  | 0.05879412 |                  |
| 0            | 0.1031602   | 0.05561781 | 0.5638109  | 0.4774404   | 2.29297    | 1.140008   |                  |
| 7.8393941    | 1.2724950   | 0.0836157  | 0.02433447 | 0.1096638   | 10.627610  | 0.6678902  |                  |
| 0.2703395    | 1.8170180   | 0.1164683  | 0.1857420  | 0.05363674  | 0.4804319  | 0.1405163  |                  |
| 0.1395445    | 0.05984027  | 0.5613544  | 0.03928766 | 0.1982915   | 0.01679412 |            |                  |
| 0.07988179   | 0.06977227  | 0.1907197  | 3.5187590  | 0.3921893   | 0.3233676  |            |                  |
| 0.05614396   | 0.07324189  | 0.9243398  | 0.02871107 | 1.25153     | 0          | 1.23646    |                  |
| 0.15013512   | 7.45980     | 0.04544626 | 0          | 0.4817554   | 0.09188589 | 0.1602337  |                  |
| 0.3425302    | 0.05869151  | 0.2040670  | 0.0930726  | 0.5326528   | 0.06659452 |            |                  |
| 0.3109113    | 0.4417281   | 0.4701     | 0.1434125  | 0.1626220   | 0.08045511 |            |                  |
| 0.4578067    | 0           | 0.2263573  | 0.3379923  | 0.2736637   | 0.03131307 | 1.154471   |                  |
| 1.0092010    | 0.02172496  | 0.1074448  | 0.2688029  | 0.2183781   | 0.1559522  |            |                  |

|              |             |             |             |             |             |             |
|--------------|-------------|-------------|-------------|-------------|-------------|-------------|
| 1.6640780    | 0.1910809   | 1.0095380   | 0.2615254   | 0.1856884   | 0.1056532   |             |
| 0.09920423   | 0.1207549   | 0.2626429   | 0.04381789  | 2.2964040   | 0.10802     | 0.2480358   |
| 0.9321018    | 0.2988823   | 0.2005210   | 0.3356920   | 0.09448407  | 0.3392524   | 1.256514    |
| 0.1207549    | 0.3337351   | 2.1733820   | 0.1196805   | 0.7754544   | 0.6464165   |             |
| 0.1101083    | 0.2233171   | 0.3777309   | 1.4798350   | 0.2060195   | 0.06159384  |             |
| 0.4529324    | 0.2050624   | 0.03745015  | 0.1591754   | 0.1685726   | 0.06097532  |             |
| 0.02960408   | 0.1743320   | 0.1010929   | 0           | 1.9151150   | 0.5150576   | 0.0365546   |
| 0.6738298    | 0.1217685   | 0.5972859   | 0.009346924 | 0.1757066   | 4.951736    |             |
| 0.1910809    | 0.05869151  | 0.04425031  | 3.9776360   | 0.2462933   | 0.0969171   |             |
| 0.1118522    | 0.5002209   | 0.1595362   | 0.3427542   | 0.6847619   | 0.3216006   |             |
| 0.3117306    | 0.5473275   | 0.06409829  | 0.1955246   | 0.06719844  | 0.0765193   | 0           |
| 0            | 0.1108202   | 0.7236013   | 0.2164108   | 0.09810453  | 0.1793612   | 0.0751094   |
| 0.0847287    | 0.3318051   | 0.3075186   | 0.1057555   | 0.3285005   | 0.2148476   |             |
| 2.0830220    | 0.4820023   | 0.1190872   | 0.5911565   | 8.3825210   | 0.02332733  |             |
| 0.3026343    | 0.2494824   | 0           | 0.08021088  | 0.1352422   | 0.06766647  | 0.05808331  |
| 0.1156246    |             |             |             |             |             |             |
| TCGA-XF-A9SY | 640         | 0           | 0.096205284 | 0.144032225 | 0           | 0.391548604 |
| 0.029527942  |             |             |             |             |             |             |
| 31.261441778 | 0           | 0.083907182 | 0.351143097 | 0.132445722 | 0.038026228 |             |
| 0.590376292  | 0.257881084 | 0.713302448 | 0.093580171 | 0.15690157  | 0.091097892 |             |
| 0.009025411  | 0.461016905 | 0.022927579 | 0.031578494 | 0.316334129 | 1.560938788 |             |
| 20.844206255 | 0.097442209 | 0.206852302 | 0           | 0.069072959 | 0.243605524 |             |
| 0.306246944  | 0.318736199 | 0.192478438 | 0.206695596 | 1.3050556   | 0.069189735 | 0           |
| 0.222271435  | 0.21498711  | 0.049710237 | 0.626391376 | 0.165514864 | 0.179498807 |             |
| 0.049697302  | 0.089017353 | 0.63579314  | 0.122075251 | 0.036233491 | 0           | 0.542575939 |
| 0.601848941  | 1.803147105 | 0.204756613 | 0.494272077 | 2.194272197 | 0           | 0.171326962 |
| 0.049337828  | 0.109752633 | 0.631569876 | 0.341047733 | 0.12961434  | 0.128899931 |             |
| 0.041339119  | 0.061068675 | 0.123154344 | 0.057682492 | 0.178617471 | 0.621499286 |             |
| 0.07678373   | 0.123736139 | 0.081535506 | 0.281712118 | 0.499703638 | 0.531502961 |             |
| 0.436541098  | 0.014966439 | 0.032126957 | 0.218795659 | 0.190204778 | 0.087029725 |             |
| 0.057019475  | 0.146293934 | 0.173782284 | 0           | 0.223943792 | 0.140569232 | 0.122348963 |
| 0.099394603  | 0.349792547 | 0.095397967 | 0           | 0.078113182 | 0.030081388 | 0.003926294 |
| 0.428114713  | 0           | 0           | 0.140873171 | 0.973368665 | 0.927098097 | 0.039484542 |
| 0            |             |             |             |             |             |             |
| 0.418320899  | 0.191241719 | 0.438646602 | 0.449733274 | 0.070867061 | 0.230467604 |             |
| 0.174059449  | 0.554337903 | 0.113999242 | 0.113210866 | 0.14564316  | 0.717632053 | 0           |
| 0.064348629  | 0.027249756 | 0           | 0           | 0.103152433 | 0.87704191  | 0.318178643 |
| 0.104937764  | 0           | 0.168357502 | 0.973282419 | 0.062114556 | 0.743921363 | 0.124017357 |
| 1.553032423  | 0.284206444 | 0.67966808  | 0.189617272 | 0           | 0.330712953 | 0.149091905 |
| 0.035685114  | 0.353679131 | 0.380925915 | 0           | 0.100678298 | 0.457554723 | 0.108054727 |
| 0            | 0.525607715 | 0           | 0.058174453 | 0.263866718 | 0.109794039 | 0.130544587 |
| 0.762902949  | 0           | 0.104937764 | 0.137104616 | 0.246689138 | 0           | 0.651553878 |
| 0.606307081  | 0           | 0.043584375 | 0           | 0.354335307 | 0.089971372 | 0.308582303 |
| 0.516738989  | 0.358324072 | 0.135740391 | 0.125731883 | 0           | 0.329673981 | 0.160966482 |
| 0.195934066  | 0.135595833 | 0.106646848 | 0.980550535 | 0.058423595 | 0.041633497 |             |
| 0.423473904  | 0.232780536 | 0.278880599 | 0.148550737 | 0.103853578 | 0.231354018 |             |

|                           |                           |                            |                                     |                            |             |             |
|---------------------------|---------------------------|----------------------------|-------------------------------------|----------------------------|-------------|-------------|
| 0.899466549               | 0                         | 0.374892165                | 0.64961473                          | 0.14564316                 | 0.331114304 | 0.921114626 |
| 0.025522749               | 0.480740526               | 0.237250597                | 0.297487119                         | 0.031836428                | 0.099940728 |             |
| 0.551188255               | 0.124773561               | 0.112850666                | 0.150660056                         | 0.068380498                | 0.045663295 | 0           |
| 0.154291152               | 0                         | 0                          | 0.532767899                         | 0.294960202                | 0.177937948 | 0.447275715 |
| 0.089808488               | 0.772028583               | 0.075830513                | 0.028509737                         | 0.128488918                | 0.723434585 |             |
| 0.095231479               | 0                         | 0.273441366                | 0.299722375                         | 0.353824737                | 0           | 0.310631711 |
| 0.403477734               | 0.888268921               | 0                          | 0.238026771                         | 0.049337828                | 0.242676913 | 0           |
| 0.117421906               | 0.031039612               | 0                          | 0.056459014                         | 0.011987618                | 0.782732502 | 0.105342929 |
| 0.015918214               | 0.800325347               | 0.076169231                | 0.091652551                         | 0.204673134                | 0.498972543 |             |
| 0.034319269               | 0                         | 0.21343274                 | 4.50648351                          | 0.078854967                | 1.769983709 | 0.42510199  |
| 0.746041916               | 2.112505315               | 0.094625961                | 0.368285516                         | 0.080960886                | 0.254988959 |             |
| 0.094653317               | 0                         | 0.274485097                | 0                                   | 0.04020209                 |             |             |
| TCGA-CF-A9FF              | 361                       | 0                          | 0.3133781                           | 0.2680966                  | 0.07576642  | 0.2512203   |
| 0.03206133                | 54.349320                 | 0.1062905                  | 0.3812699                           | 0.2876182                  | 0           | 0.5994032   |
| 0.6160142.6720290.1580585 |                           | 0.08888513                 | 0                                   | 0.06859831                 | 0.6825961   |             |
| 0.09957873                | 0.1714391                 | 0.08586861                 | 2.488                               | 105.29770.0288552          | 0           |             |
| 0.0961840                 | 0.1322531.8742140         | 0.0522481                  | 0.04488587                          | 0.6642303                  |             |             |
| 0.2003359                 | 0.1113709                 | 0.6033538                  | 0.3289272                           | 0.3084297                  | 0.1263105   |             |
| 0.08749304                | 0.03248319                | 0.1618835                  | 0                                   | 12.636260.1325489          | 0.1573688   |             |
| 0.01297052                | 2.1040250.7079425         | 6.3873770.1667430.9660219  | 0.5725467                           |                            |             |             |
| 0.2227419                 | 2.6353710                 | 0.1191693.2230550.07406168 | 0.1407348                           | 0.4198772                  |             |             |
| 0                         | 0.07233616                | 0.3231580.1878943          | 0.1939422                           | 0.3374108                  | 0.037054    |             |
| 0.2015284                 | 0.1217301                 | 0.1529410.4340611          | 11.798570.2764969                   | 0.09750303                 |             |             |
| 0.06976667                | 0.3325946                 | 0.09178829                 | 0                                   | 0.2166904                  | 0.07942271  | 0.1509537   |
| 0                         | 0.1621049                 | 0.1817019                  | 0.3985382                           | 0.05396115                 | 0.2278821   | 0.1035828   |
| 0.06276414                | 0.1211643                 | 0.2286358                  | 0.05968419                          | 0.8485273                  | 0.05386304  |             |
| 0.08368551                | 0.2069453                 | 0.8326935                  | 0                                   | 0.5573383                  | 0.06440146  | 0.1009359   |
| 2.8378771.0478180         | 0.1624441                 | 0.6737255                  | 0.3779862                           | 0.9028471                  |             |             |
| 0.2475599                 | 0.06146198                | 0.1581388                  | 3.6862260.1384330.2794780.007396922 |                            |             |             |
| 0.07036739                | 0.06146198                | 0.2240051                  | 0.2027151.0364320                   | 0                          | 0.3440978   |             |
| 0.9008672                 | 0.1011656                 | 0.4147891                  | 0                                   | 1.1482430.04408433         | 0.89612     |             |
| 0.3202667                 | 0                         | 1.2894490.7284755          | 0.1439166                           | 0.1097210.3619070.07190454 |             |             |
| 0.2186323                 | 1.76644                   | 0                          | 0                                   | 0.06370897                 | 0.3158281   | 0.9741188   |
| 0.1788210                 | 0.2034562                 | 0                          | 0.2278821                           | 0.07443385                 | 0.2142833   | 0           |
| 1.0611821.03155           | 0.4975720.2839425         | 0.05261931                 | 0.48092                             | 0.2808605                  |             |             |
| 0.1675288                 | 0.4488587                 | 0.3890670                  | 0.2047788                           | 0.2544450.4581873          |             |             |
| 0.3058594                 | 0.1063723                 | 0.09464751                 | 0.01929946                          | 0.02661696                 | 0.06343613  |             |
| 0.3616440.1313733         | 0.1369075                 | 0.4542113                  | 0.2150611                           | 0.08591531                 |             |             |
| 1.0827730.1953275         | 0                         | 0.09045701                 | 0.1007642                           | 0.6325553                  | 0.5752363   |             |
| 0.5037216                 | 0.02771251                | 0.3739604                  | 0.4293431                           | 0.4845157                  | 0.3802467   |             |
| 0.05425764                | 0.3740489                 | 0.2257978                  | 0.05655362                          | 0.3115927                  | 0.0742473   |             |
| 0.1156891                 | 0                         | 3.6856330.09777119         | 0.1781042                           | 0.3414948                  | 0.5631873   |             |
| 0.1067556                 | 0.8372191.7807180.1755247 | 0.4815570.1482057          | 0.1238231                           |                            |             |             |
| 2.1711680.05610733        | 0.1034020                 | 0.1790142                  | 0.5818428                           | 0.1707474                  | 0           |             |

|              |                           |                            |                    |                    |                    |                      |
|--------------|---------------------------|----------------------------|--------------------|--------------------|--------------------|----------------------|
|              | 0.1355820.2248552         | 0.7577854                  | 0.9644792          | 0.2428252          | 0.2584486          | 0                    |
|              | 0.07528506                | 0.1148243                  | 0.09106877         | 0.0674054          | 0.1166326          | 0 0                  |
|              | 2.0033080                 | 0.1382715                  | 0                  | 0.1654086          | 0.03109875         | 0.2270645 0.7368243  |
|              | 0.4099011                 | 0                          | 0.6566094          | 0.3191168          | 0.2568613          | 0.6629610.04196129   |
|              | 1.50437810.904140.1643912 | 0.2665887                  | 0                  | 0.2768661          | 0.1541613          |                      |
|              | 0.03971136                | 0.4172489                  | 0.1169491          | 0.07275214         |                    |                      |
| TCGA-XF-A9ST | 128 1 0                   | 0.1348682                  | 0                  | 0.1999835          | 0.3041416          | 37.427720            |
|              | 0.07856861                | 0.2959215                  | 0.1240189          | 0.1246239          | 0.0682043          | 0.1448841            |
|              | 1.6364010.1265711         | 0.06387772                 | 0 0                | 0.1569763          | 0.04293764         | 0.08870796           |
|              | 0.9626742                 | 1.43719699.538980.05806339 | 0.1549531          | 0.3317908          | 0 0                |                      |
|              | 0.7038705                 | 0                          | 0.1802321 0        | 0.42007 0.3599309  | 0.01920894         | 0                    |
|              | 0.09150392                | 0.04654744                 | 0.1005493          | 0.1835337          | 0.01400652         | 0.5118886 0          |
|              | 0.4918034                 | 0.2286165                  | 0.1696407          | 0                  | 0.3628962          | 0.1408891 7.510042   |
|              | 0.04793226                | 0.5091066                  | 0.07963807         | 0.1920894          | 0.3342215          | 0 0.01445198         |
|              | 0.5913864                 | 0.3832184                  | 0                  | 0.4023290          | 0.01299618         | 0.1489533 0.1080249  |
|              | 0.1254397                 | 0.2327826                  | 0                  | 0.1158635          | 0.02863044         | 0.3033565 0.3275371  |
|              | 0.2764923                 | 0.06812771                 | 0.5045113          | 0                  | 0.2253623          | 0.1781031 0          |
|              | 0.4538288                 | 0.1369860.06509017         | 0.1377988          | 1.1183760.05641095 | 0.3436936          |                      |
|              | 0 0.1965223               | 0 0                        | 0.04179614         | 0                  | 0.003676485        | 0.08272045 0 0       |
|              | 0.04267681                | 0.1104774                  | 0.008469383        | 0 0                | 0.08704563         | 0.2984567            |
|              | 0.4518116                 | 0.04679101                 | 0.4350146          | 0.3320064          | 0                  | 0.2433133 0.03558202 |
|              | 0 0                       | 4.4195140                  | 0.1205089          | 0.06379            | 0.06068383         | 0.2120157 0          |
|              | 0.02032773                | 0.07448365                 | 0.09826113         | 0                  | 0.1390992          | 3.09264 0.02908127   |
|              | 0.4518419                 | 0.05806339                 | 0.3168731          | 0.0380177          | 0.1363767          | 0.1282327 0          |
|              | 0.4926591                 | 0.1396060.06682932         | 0.1892437          | 0.0445862          | 0                  | 0.141409             |
|              | 0.5712572                 | 0.3035393                  | 0.15746 0 0        | 0.2723656          | 0.04941565         | 0.1028084            |
|              | 0.08149248                | 0.2694529                  | 0                  | 0.2456528          | 0                  | 0.4157885 0 1.525247 |
|              | 1.5467320                 | 0.04081133                 | 0.2722688          | 0.4147385          | 0.09477784         | 0.1525008            |
|              | 0.09677232                | 0.1917290                  | 0 0                | 0.5927012          | 0.07536252         | 0.1376009            |
|              | 0.009069185               | 0.09986147                 | 0.02295408         | 0                  | 0.01299486         | 0.1699416 0.563089   |
|              | 0.2176141                 | 0.2318321                  | 0.09261516         | 1.3894470.1122984  | 0 0 0              |                      |
|              | 0.09091777                | 0                          | 0.3336713          | 0                  | 0.6953864          | 0.3702593 0.1193827  |
|              | 0.05962169                | 0.2807461                  | 0.4731091          | 0.03894496         | 0.03251402         | 0.1477922 0          |
|              | 0.1377757                 | 0                          | 0.07223721         | 0                  | 0.05119818         | 0.07362505 0.1164764 |
|              | 0.4603224                 | 0.0555389                  | 0.4188179          | 0.1009133          | 1.3689120.02840233 |                      |
|              | 0.05339163                | 0.09023538                 | 0.04838616         | 0.0891724          | 0.2016939          | 0.01882675           |
|              | 0.1785971                 | 0.03681253                 | 0                  | 0.1169240          | 0.1429538          | 1.7330510 0.0557206  |
|              | 0                         | 0.03246238                 | 0                  | 0.1963410.1453236  | 0.2011645          | 0.02643341 0.2693978 |
|              | 0.3141134                 | 0.1315207                  | 0.08943253         | 0.4087663          | 0.1711752          | 0.01609147           |
|              | 0.07499382                | 0.1308232                  | 0.6427143          | 0                  | 0.2598091          | 0.04586695 0         |
|              | 0.3147716                 | 0                          | 0.2993894          | 0.4260518          | 0.04725622         | 0 0 0.1591769 0      |
|              | 0.03424651                | 0.1884821                  | 0                  | 0.08783657         |                    |                      |
| TCGA-DK-A6B5 | 1542 0                    | 0.39414                    | 0.2479330.04204081 | 0.2359002          | 0                  |                      |
|              | 40.981290                 | 0.1685080.3384907          | 0.0797959          | 0.08018515         | 0.2540642          |                      |

|              |            |            |            |             |             |            |            |
|--------------|------------|------------|------------|-------------|-------------|------------|------------|
| 0.3728837    | 0.9669385  | 0.2568430  | 0.1500151  | 0.05488466  | 0.1631289   |            |            |
| 0.2272528    | 0.07597374 | 0.1712287  | 0.09529249 | 11.0546929  | 6.93350     | 0.16011    |            |
| 0.7103589    | 0.2668499  | 0.04161508 | 0          | 2.6334270   | 0.07681287  | 0.08697331 |            |
| 0.04981198   | 0.6142734  | 0.1991637  | 0.07415619 | 0.5356564   | 0.2001757   |            |            |
| 0.09412676   | 0.2264330  | 0.1246492  | 0.1802407  | 0.5389493   | 0           | 5.962298   |            |
| 0.2206437    | 0.9605180  | 0.09356104 | 1.1674680  | 0.8158544   | 2.0891540   | 0.1233618  |            |
| 0.5657992    | 0.09223291 | 0.3089841  | 0.2494509  | 0.2675255   | 0.01756413  |            |            |
| 2.4733030    | 0.04109489 | 0          | 0.2070923  | 0           | 0.006689574 | 0.1669456  | 0.1390102  |
| 0.4304538    | 0.1123323  | 0.01028015 | 0.2050085  | 0.1596514   | 0.3903696   |            |            |
| 0.9633966    | 2.5261790  | 0.1972555  | 0.0901698  | 0.004838962 | 0.1713660   | 0.08912911 |            |
| 0.02621683   | 0.3607075  | 0.3966263  | 0.1884606  | 0.3014512   | 0.08994777  |            |            |
| 0.1855118    | 0.9582664  | 0          | 0.8851207  | 0.1724261   | 0.03482618  | 0.08740017 |            |
| 0            | 0.01419308 | 0.9007099  | 0.6575182  | 0           | 0.3444856   | 2.2213450  | 0.1008129  |
| 0            | 0.03573468 | 0.02800333 | 1.3442251  | 0.2156690   | 0.1806369   | 0.04269599 |            |
| 0.6301750    | 0.1835178  | 1.4715880  | 0.1144704  | 0           | 0.02924903  | 2.87685    | 0.1536257  |
| 0.2326126    | 0.03693922 | 0.03904502 | 0.3410364  | 0.5903991   | 0.1778773   |            |            |
| 0.1437722    | 0.0632229  | 0.5214042  | 0.3430789  | 0.9612839   | 0.03742278  |            |            |
| 0.6056726    | 0.2241539  | 1.7730420  | 0.4158411  | 0.05849806  | 0.1967477   |            |            |
| 0.1369831    | 0.1320910  | 0.2245622  | 0.1750679  | 0           | 0.5737506   | 0.0797959  |            |
| 0.5459099    | 1.09246    | 0          | 0.05065626 | 0           | 0           | 0.3504894  | 1.9394880  |
| 0.1835178    | 0.3548052  | 0.4336710  | 0.7270634  | 0.2065070   | 0.2675255   | 0.03061072 |            |
| 1.1776450    | 0.4170610  | 0.04247534 | 0.2100697  | 0.7007299   | 1.22751     | 0.2235996  |            |
| 0.2065719    | 0.2801924  | 0.6476493  | 0.04089044 | 0.05681321  | 0           | 1.024889   |            |
| 0.6061193    | 0.08853477 | 0.08752905 | 0.3962243  | 0.3396882   | 0.1407962   |            |            |
| 0.1086945    | 0.2186868  | 0.3213962  | 0.1400167  | 0.1789977   | 0.3188075   |            |            |
| 1.3409910    | 0.6502927  | 0.08853477 | 0.07528834 | 0.5032027   | 0.3217393   |            |            |
| 0.03989795   | 0.9357239  | 0.03075389 | 0.6570859  | 0.4526393   | 0.1536257   |            |            |
| 0.1438561    | 0.3010614  | 0.3320799  | 0.1002314  | 0.2510410   | 0.2204406   |            |            |
| 0.1235936    | 0.1589537  | 0          | 1.9521040  | 0.1627520   | 0.06588359  | 0.2368581  |            |
| 0.1428158    | 0.4146511  | 0.7504284  | 1.0479570  | 0.1839666   | 1.74177     | 0.08223546 |            |
| 0.1030593    | 0.1016033  | 0.3735899  | 0.2581878  | 0.04325778  | 0.0242269   |            |            |
| 0.5034261    | 0.1894865  | 0.1093434  | 0          | 0.1247663   | 0.7226919   | 0.5530627  |            |
| 0            | 0.1613322  | 0          | 0.3968502  | 0.0637130   | 0.07579752  | 0.2618104  | 0          |
| 0.008503857  | 0.3972265  | 1.3473730  | 0.2589409  | 1.0081950   | 0.2019179   |            |            |
| 0.08627942   | 0.5817085  | 0.3246707  | 0.1033834  | 0.06021229  | 0.3257587   |            |            |
| 0.7673013    | 0.1187714  | 0.8514505  | 0.02328322 | 3.0179064   | 0.8853720   | 0.07601366 |            |
| 0.2958462    | 0.04877731 | 0.1024172  | 0.04989839 | 0.02203479  | 0.5402145   |            |            |
| 0.00405575   | 0.06458921 |            |            |             |             |            |            |
| TCGA-GC-A3RC | 484        | 0          | 0.1132618  | 0.03028002  | 0           | 0.1309566  | 0          |
|              | 0.4115971  | 0.1033496  | 0.5847277  | 0.01399     | 0.09590728  | 0.07590038 |            |
|              | 0.5773390  | 0.1147617  | 0.02007816 | 0.06703055  | 0.03320485  | 0.3700581  |            |
|              | 0.03374059 | 0.06970712 | 0          | 1.5996538   | 0.2823810   | 0.1694698  | 0.2283054  |
|              | 0.1303614  | 0          | 0          | 0.3687364   | 0           | 0.03540679 | 0.1825059  |
|              | 0.1923280  | 0.03018895 | 0          | 0.1294275   | 0.07837969  | 0.1119338  | 0.07211081 |

|              |             |             |            |            |             |            |            |
|--------------|-------------|-------------|------------|------------|-------------|------------|------------|
| 0.03301916   | 0.03656767  | 0.5894971   | 0.6508823  | 0.04491197 | 0.07998267  |            |            |
| 0.008789689  | 0.1140662   | 0.3321339   | 3.536052   | 0.07533077 | 0.6546408   |            |            |
| 0.3629638    | 0.4528342   | 0.1996009   | 0          | 0.02397469 | 0.09294283  | 0          | 0          |
| 0.09484559   | 0           | 0.008169967 | 0.03020598 | 0          | 0.5585697   | 0.2743825  | 0          |
| 0.2200279    | 0.07499309  | 0.2280146   | 1.507512   | 0.1303614  | 0.1070701   | 0          |            |
| 0.02363927   | 0.08049579  | 0.03110093  | 0          | 0.1678215  | 0.5382212   | 0.2557408  |            |
| 0            | 0.4119491   | 0.07387997  | 0.09002534 | 0.07313534 | 0           | 0          | 0.0656872  |
| 0.06640237   | 0.01155599  | 0.1700055   | 0.7300237  | 0          | 0.06402258  | 1.692866   |            |
| 0.04658696   | 0           | 0.1309282   | 0.3420043  | 1.078832   | 0.1291039   | 0.03676859 |            |
| 0.1274644    | 0.1174015   | 0.09605574  | 0.8540118  | 0.1957236  | 0           | 0          |            |
| 0.4163387    | 0           | 0.1893929   | 0.01503794 | 0.09537126 | 0           | 0.07590038 |            |
| 0.4312878    | 0.292648    | 0.1544281   | 0          | 0.08380036 | 1.338377    | 0.0114261  |            |
| 0.5621774    | 0.1825059   | 0.3512683   | 0.1792469  | 0.178609   | 0.07751216  | 0          |            |
| 0.4756215    | 0.0548515   | 0.03751056  | 0          | 0.03503604 | 0.09745461  | 0.2222397  |            |
| 0.1496322    | 0           | 0           | 0.07031752 | 0          | 0.04280523  | 0.3494794  | 0.04039366 |
| 0.06403716   | 0.1969649   | 0           | 0.03860702 | 0.2522067  | 0.1089095   | 0          |            |
| 0.958837     | 0.4074848   | 0           | 0.06413946 | 0.0713167  | 0.2607227   | 0.3392835  |            |
| 0.006307148  | 0.3041765   | 1.1299620   | 0.1040788  | 0          | 0.4366381   | 0.08883031 |            |
| 0.03604246   | 0.09977249  | 0.0261572   | 0.8477588  | 0.04298855 | 0.0510571   |            |            |
| 0.3115955    | 0.192692    | 0.2736034   | 0.1093048  | 0.03274984 | 0.07044088  |            |            |
| 0.4853454    | 0.07208492  | 0.0612997   | 1.911967   | 0.0714436  | 0.1949092   |            |            |
| 0.4699820    | 0.2824582   | 1.052274    | 0.03127048 | 0.05856374 | 0.07353718  |            |            |
| 0.5407583    | 0.09180938  | 0.08303642  | 0.04751009 | 0.05031491 | 0.03546605  | 0          |            |
| 0.07568577   | 0           | 0.1206953   | 0.1157098  | 0.08461995 | 0.5787575   | 0.04364272 |            |
| 0.2925414    | 0.1585963   | 0.4592864   | 0.02231868 | 0.06293307 | 0.0118179   | 0          |            |
| 0.03503604   | 0           | 0.03550594  | 0.253953   | 0.0578549  | 0.08902728  | 0.09187941 | 0          |
| 0.1524531    | 0.2022660   | 0.0437855   | 0          | 0.1020363  | 0           | 0.01234285 | 0.1370352  |
| 0            | 0.04154299  | 0.008820585 | 1.028466   | 0.02583739 | 0.03513825  | 0.8565611  |            |
| 0.08967348   | 0.03793425  | 0.157148    | 0.1321733  | 0.02525239 | 0.02451239  |            |            |
| 0.2146289    | 0.07208492  | 0.02901106  | 1.075211   | 0.1137431  | 0.1960513   |            |            |
| 1.877235     | 0.04641769  | 0.2484051   | 0          | 0.1876229  | 0.06964666  | 0.02691106 |            |
| 0.06732277   | 0.009906563 | 0.0493017   |            |            |             |            |            |
| TCGA-GV-A3QK | 832         | 0           | 0.1142686  | 0.3221549  | 0.263713    | 0.2882633  | 0.06376735 |
| 30.386490    | 0.2189531   | 0.4739465   | 0.2860244  | 0.09238489 | 0.1345323   |            |            |
| 0.5012186    | 0.8664857   | 0.2077056   | 0.1049662  | 0.04918283 | 0.009745456 |            |            |
| 0.1357627    | 0.0742702   | 0.03409782  | 0.08539279 | 3.584558   | 39.08325    | 0.06695571 |            |
| 0.02233549   | 0.04782551  | 0.1864589   | 0          | 0.8116672  | 0           | 0.3377308  | 0          |
| 0.7926596    | 0.3112903   | 0.2104322   | 0.3900068  | 0.4537257  | 0.0498421   |            |            |
| 0.07246765   | 0.09053558  | 0.2745772   | 0.2414796  | 0.09611913 | 11.3126     |            |            |
| 0.2636288    | 0.1760588   | 0.09029054  | 1.046183   | 1.028952   | 4.272832    | 0.6080031  |            |
| 0.7471869    | 0.1653021   | 0.2768845   | 0.8478955  | 0          | 0.02407207  | 0.9547389  |            |
| 0.07365128   | 0.3498873   | 0.4175506   | 0          | 0.01948248 | 0.1994693   | 0.1868532  |            |
| 1.133097     | 0.4026494   | 0.04145476  | 0.3117515  | 0.1980909  | 0.4562805   | 1.78058    |            |
| 13.39114     | 0.2946051   | 0.105043    | 0.01300876 | 0.1771883  | 0.06845975  | 0.09397293 |            |



|              |            |            |            |            |            |            |
|--------------|------------|------------|------------|------------|------------|------------|
| 0.4309793    | 0.2764391  | 0.3189992  | 0          | 0.2821116  | 0.3216371  | 0.1321099  |
| 0.08049321   | 0.2266193  | 0.05150439 | 0.03120817 | 0.1506161  | 0          | 0.02755696 |
| 0.4952888    | 0.05356457 | 0          | 0.5569983  | 1.2898930  | 0.0213173  | 0          |
| 0.02509413   | 2.3059050  | 0.4025954  | 0.1079140  | 0.1232835  | 0.1914263  | 0.09397293 |
| 0.5518001    | 0.3077352  | 0          | 0.07863126 | 2.0117190  | 0.1032495  | 0.3821529  |
| 0.4198648    | 0.3056070  | 0.4733731  | 0.1195486  | 0.7730164  | 0          | 0.1229571  |
| 0.1550553    | 1.5763960  | 0.2179776  | 0.0651301  | 0.03347786 | 2.4109990  | 0.2849603  |
| 0.02621042   | 0.1535587  | 0.2455043  | 0.8683953  | 0.5634524  | 0.2724767  |            |
| 0.1091130    | 0.2827798  | 0.3575305  | 0.1630656  | 0.7593859  | 0          | 0          |
| 0.03167797   | 0.1884468  | 1.0541960  | 0.2963834  | 0.1174662  | 0.3143322  |            |
| 0.2295624    | 0.4249113  | 0          | 0.3196439  | 0.02743065 | 1.6269241  | 0.778456   |
| 0.3045014    | 0.2353076  | 0.9157353  | 1.7695440  | 0.5221773  | 0.04165011 |            |
| 1.4228091    | 0.3818250  | 0.03664243 | 0.1357627  | 0.1084436  | 0.5268434  | 0.1086302  |
| 0.2644570    | 0.1202683  | 0.04798129 | 0.2249904  | 0          | 0.1723275  | 0.4245972  |
| 0.1361488    | 0.2509413  | 0.5079399  | 0.2109281  | 0.9690958  | 0.3884903  |            |
| 0.1057828    | 0.02248894 | 0.1503087  | 0.5242084  | 0.1430122  | 0.9038526  |            |
| 0.04133842   | 0.5229677  | 0.3486872  | 0.2409154  | 0.3007929  | 0.08093548 |            |
| 0.3099802    | 0.1571826  | 0.3561882  | 0.4221925  | 0.1107538  | 0.08628602 |            |
| 0.02593355   | 1.1800870  | 0          | 0.2547018  | 0.1621912  | 0.2388691  | 0.056736   |
| 2.0391610    | 0.2327361  | 0.4345470  | 0.1064443  | 0.2308818  | 1.1424350  | 0.05579643 |
| 0.1542435    | 0          | 0.01953903 | 0.8090853  | 0.1273509  | 0          | 0.06741536 |
| 0.1397558    | 0.8713341  | 0.8853552  | 0          | 0.2570165  | 0.07991098 | 0.2058867  |
| 0.1712821    | 0.2581078  | 0.06703189 | 0.1739794  | 0          | 0          | 2.98831    |
| 0.1890698    | 0          | 0.1727166  | 0.1670027  | 0.1681536  | 0.9590292  | 0.0741145  |
| 0.07194265   | 0.7374731  | 0.1586742  | 0.08514599 | 0.7666993  | 0.08345755 |            |
| 1.8125128    | 0.4573960  | 0.2418146  | 0.3976672  | 0.04370996 | 0.6424411  | 0.07665355 |
| 0.07898261   | 0.7113202  | 0.02180645 | 0.1808725  |            |            |            |
| TCGA-GU-A764 | 610        | 0          | 0.02675025 | 0.01430311 | 0.2910372  | 0.1855766  |
| 0.2463107    | 24.504350  | 0.1397980  | 0.2527494  | 0.3905467  | 0          | 0.06608336 |
| 0.9460311    | 0.5019338  | 1.2643950  | 0.09396228 | 0.3011217  | 0.09498794 |            |
| 0.1317514    | 0.2039347  | 0.0318755  | 0.2853669  | 0          | 2.079451   | 27.61577   |
| 0.1416287    | 0.02875804 | 0.8620875  | 0.0480151  | 0.0160320  | 0.9676493  | 1.06351    |
| 0            | 0.4819443  | 0.1710086  | 0.04278028 | 0.4635257  | 0.08151544 | 0.2073318  |
| 0.2052724    | 0.0711525  | 0.02079597 | 0.2418242  | 0.8353671  | 1.5180430  | 0.08485873 |
| 0.1007486    | 0.05812674 | 0.4849242  | 0.2789107  | 2.5579040  | 0.0711667  |            |
| 0.2061514    | 0.1891863  | 0.7130047  | 0.4168335  | 0.1028893  | 0.1382808  |            |
| 1.1414680    | 0.0450497  | 0.2986760  | 0.08620875 | 0.1736630  | 0.1569495  | 0.08019419 |
| 0.1552040    | 0.9072538  | 0.06523614 | 0.07167772 | 0.1416954  | 0.08812252 |            |
| 0.4515697    | 0.7389322  | 0.0758637  | 0.1352480  | 0.1563279  | 0.07604621 |            |
| 0.08814528   | 0.03024868 | 0.3963621  | 0.1525410  | 0.2899250  | 0.07783554 |            |
| 0.1209799    | 0.3401960  | 0.04863058 | 0          | 0          | 0.02327107 | 0.08364245 |
| 0.09006699   | 0.3117686  | 0.2069010  | 0.4821845  | 0.7459643  | 1.6197930  | 0.09745461 |
| 0.08234121   | 0          | 1.7770460  | 0.2658775  | 0.3659021  | 0.1389445  | 0.1970486  |
| 0.3820297    | 0.1512434  | 0.3371720  | 0.02641494 | 0.2360904  | 0          | 4.1634860  |

|                                   |                                  |                                           |                   |                    |                    |
|-----------------------------------|----------------------------------|-------------------------------------------|-------------------|--------------------|--------------------|
| 0.4025786                         | 0.02841337                       | 0.0450497                                 | 0.4328323         | 0.03585241         | 0.8088587          |
| 0.1105885                         | 0                                | 0                                         | 0.1204732         | 1.1756660          | 1.5933050.04310438 |
| 0.0282231                         | 2.6322810.04393651               | 0                                         | 1.61968           | 0.1554584          | 0.07796158         |
| 0.03512208                        | 0.09929804                       | 0.0920676                                 | 0.4549023         | 0.8599457          | 0.1126689          |
| 0.02922331                        | 0.1328611                        | 0                                         | 0.1213172         | 0.5502686          | 0.03816082         |
| 0.2744640.3448350                 | 0.04765308                       | 0.1028893                                 | 0                 | 1.1889090.4446954  | 0                  |
| 0.1514850.2358108                 | 0.6157768                        | 0.1837177                                 | 0.3217593         | 0.1077609          |                    |
| 0.3914168                         | 0.04717892                       | 0.06555043                                | 0.04654215        | 0.3941686          | 0.08392002         |
| 0.1362005                         | 0.1615840.06177826               | 0.5623320.1218368                         | 0.2315271         | 0.1682122          |                    |
| 0.4921836                         | 0.1615496                        | 0.1032628                                 | 0.09969401        | 1.0536630.4585169  |                    |
| 0.06810027                        | 0.05791122                       | 0.3870597                                 | 0                 | 0.2301692.3508770  | 0.3042528          |
| 0.2382194                         | 0.5465259                        | 0.0663918                                 | 0.03473613        | 1.2133080.05782294 |                    |
| 0.1146524                         | 0.3141870.0950673                | 0.09346295                                | 0                 | 0.3575104          | 0.1251876          |
| 0.1093137                         | 0.5905948                        | 0.2050370.2886119                         | 0.3109168         | 0.1997727          |                    |
| 0.9020518                         | 0.08433986                       | 0.05945431                                | 0.7787334         | 0.1436813          | 0                  |
| 0.5702356                         | 0.5808472                        | 0                                         | 0.04205305        | 0.1302009          | 0.07197695         |
| 0.5100810.1036389                 | 0.1240955                        | 0.03429643                                | 0                 | 0.07351134         | 0.0466423          |
| 0.2157671                         | 0                                | 0.009811653                               | 0.04999805        | 0.3497814          | 0.02440917         |
| 0.2528790.1270749                 | 0.1075121                        | 0.0866024                                 | 0.1803636         | 0.02385651         |                    |
| 0.02315742                        | 0.1780374                        | 0.06810027                                | 0.05481481        | 1.6643470.1611835  | 1.70397            |
| 5.8626060.08331852                | 0.6186860.1688361                | 0.2954194                                 | 0.04934759        | 0.07627048         |                    |
| 0.4324892                         | 0                                | 0.3353504                                 |                   |                    |                    |
| TCGA-GU-A42R                      | 577                              | 1                                         | 0.2212425         | 0.5027593          | 0.2005894          |
| 0.02122036                        | 48.8748                          | 0.04817596                                | 0.2311508         | 0.3028203          | 0.1903652          |
| 0.4372430.1294868                 | 1.1860941.5891140.4931793        | 0.06128146                                | 0.2946052         |                    |                    |
| 1.3037150.1807153                 | 0.3048243                        | 0.0453880.1705014.79956933.847570.1400544 |                   |                    |                    |
| 0.3419068                         | 0.4456276                        | 0.2978372                                 | 0                 | 1.1404430.09162437 | 0.8299519          |
| 0.05941701                        | 0.4396326                        | 0.2651917                                 | 0.4717622         | 0.9983510.4915949  |                    |
| 0.1224838                         | 0.0192925                        | 0.1612056                                 | 0.2579949         | 0.1428606          | 0                  |
| 0.7018385                         | 0.5728652                        | 0.1116021.1697720.1441736                 | 5.3768490.4782345 |                    |                    |
| 2.2378260.1711388                 | 0.2211385                        | 1.2620291.4182720.07764172                | 0.8623719         |                    |                    |
| 0.09803807                        | 0.2794434                        | 0.3087813                                 | 0.02970851        | 0.01595899         | 0.132758           |
| 0.9948895                         | 0.4813653                        | 0.1339928                                 | 0.01839363        | 0.3631040.4687663  |                    |
| 0.3644162                         | 1.9033039.5916040.3137218        | 0.06453411                                | 0.01154408        | 0.1572383          |                    |
| 0.01518793                        | 0.1563606                        | 0.3483066                                 | 0.5256733         | 0.4995571          | 0.3595787          |
| 0.1877610.2357147                 | 0.08792652                       | 0.1428606                                 | 0.1508278         | 0.06855809         |                    |
| 0.4569571                         | 0.1684090.0216181                | 0.02821645                                | 0.7618401         | 0.07130042         |                    |
| 0.05538874                        | 0.2828737                        | 2.79806                                   | 0.02275042        | 0                  | 0.0852505          |
| 3.7565990.8511344                 | 0.1436455                        | 0.06224639                                | 0.3822147         | 0.1876327          |                    |
| 1.5312610.2457779                 | 0.0813594                        | 0.5582239                                 | 1.9339830.1832487 | 1.017376           |                    |
| 0.01958314                        | 0.3260173                        | 0.5695158                                 | 0.6301124         | 0.09984781         | 0.9146409          |
| 0.8183478                         | 0.4377017                        | 1.3186410.2566734                         | 0.2745355         | 0.08912552         | 0                  |
| 0.5906170.0583560.2093340.8251853 | 0.2723281.2315533.1072180.435969 |                                           |                   |                    |                    |
| 0.1815520.5475076                 | 0.1427739                        | 2.2067611.8633320.03882696                | 0                 | 0.03433908         |                    |

|              |            |            |            |            |            |            |            |            |
|--------------|------------|------------|------------|------------|------------|------------|------------|------------|
| 0            | 1.421448   | 2.5031     | 0.2761636  | 0.2189048  | 0.6011655  | 0.1018577  |            |            |
| 0.7541390    | 2.463268   |            | 0.6382225  | 0.1460530  | 0.9364831  | 1.8561190  | 0.2505765  |            |
| 0.5224054    | 2.419121   | 1.3133710  | 0.2956850  | 0.7055771  | 1.1404050  | 0.2438758  | 0.4404936  |            |
| 0.09623369   | 1.1277460  | 0.1156791  |            | 0.4928305  | 0.08352551 | 0.02554738 |            |            |
| 0.08808452   | 0.2519180  | 0.6582414  |            | 0.7390897  | 0.2509329  | 0.4342402  |            |            |
| 1.6725190    | 0.3660657  | 1.1294440  | 0.08618732 | 0.07040436 | 0.5088999  | 0.06669257 |            |            |
| 0.6628909    | 0.1427739  |            | 0.4396976  | 0          | 0.8766060  | 0.3741550  | 0.09162437 |            |
| 0.4232682    | 0.5745821  |            | 0.2805803  | 0.5380138  | 0.3244021  | 0.5980761  |            |            |
| 0.2948513    | 0.2789368  |            | 0.03452045 | 0.2402441  | 0.1294232  | 0          | 0.3390366  |            |
| 0.2513148    | 0.4592775  |            | 1.3213833  | 0.2857930  | 0.4776048  | 1.3457360  | 0.1525884  |            |
| 0.1229318    | 0.9176190  | 0.1114069  |            | 0.4448499  | 0.05159899 | 0.09247512 |            |            |
| 0.3459399    | 0.2542774  |            | 0.2173793  | 0.1346060  | 0.2232366  | 1.6927440  | 0.9948986  |            |
| 0            | 0.2565882  | 0.07091361 | 0.2242294  | 0.6839865  | 0.1808264  | 0.2453740  |            |            |
| 0.02028724   | 0          | 4.2992110  | 0.2775853  | 0.1944746  | 0.1568609  | 0.3612793  |            |            |
| 0.2387658    | 0.7610261  |            | 1.37698    | 0.1233183  | 0.2154683  | 1.6003090  | 0.03520218 |            |
| 0.4250205    | 0.4634437  |            | 0.05554565 | 1.5318454  | 0.22749    | 0.3400164  | 0.2867255  |            |
| 0.2327313    | 0.4275804  |            | 0.05101721 | 0.05256733 | 1.42027    | 0          | 0.231131   |            |
| TCGA-DK-A6B6 | 1115       | 0          | 0.2849665  | 0.2437903  | 0.06889727 | 0.2635893  | 0          |            |
| 25.3655      | 0          | 0.1380770  | 0.2426922  | 0.1307710  | 0.5068630  | 0.1097690  | 0.3564685  |            |
| 0.7394973    | 0.1642612  |            | 0.09429769 | 0.2248650  | 0.00891129 | 0.08276138 |            |            |
| 0.2376956    | 0.0623584  | 0          | 3.61903321 | 0.916090   | 0.02623912 | 0.08169471 |            |            |
| 0.08746374   | 0.4091974  | 0          | 1.8692250  | 0.1425335  | 0          | 0.5637423  |            |            |
| 0.3567554    | 0.2228024  |            | 0.3840567  | 0.2605116  | 0.04908168 | 0.0265059  |            |            |
| 0.0838613    | 0.1476910  | 0.2453445  | 0          | 9.3617210  | 0.4218609  | 0.1431014  |            |            |
| 0.1297404    | 0.3826538  |            | 0.4951991  | 5.3732660  | 0.1010838  | 2.0496940  | 0.08397391 |            |
| 0.2025476    | 0.7894163  | 0          | 0.01354561 | 3.11792    | 0          | 0.06398772 | 0.1272701  |            |
| 0            | 0.0109630  | 0.1266637  | 0.1139063  | 0.8817948  | 0          | 0.0168473  | 0.3054289  |            |
| 0.1207568    | 0.3198725  |            | 2.2202337  | 0.1720260  | 0.1795922  | 0.05910879 | 0.03965091 |            |
| 0.02160291   | 0.02086664 |            | 0.08592928 | 0.3659402  | 0          | 0.2059019  | 0          |            |
| 0.07370405   | 0.2974110  | 0.1208019  |            | 0.09813782 | 0          | 0          | 0.2974840  | 0.02970103 |
| 0.007753297  | 0.4965065  |            | 0.09795938 | 0.07609839 | 0.2945476  | 2.533706   |            |            |
| 0.004465246  | 0          | 0          | 0          | 1.2588240  | 0.6929603  | 0          | 0.2176875  | 0.2100494  |
| 0.1288939    | 0.7696809  |            | 0.1125578  | 0.1117794  | 0          | 2.5072050  | 0.06294119 |            |
| 1.4613040    | 0.0067263  |            | 0.1919632  | 0.3353381  | 0.2036963  | 0.08145095 |            |            |
| 0.7853887    | 0          | 0.2698380  | 0.1515615  | 2.1582570  | 0.1073260  | 0.2382211  | 0          |            |
| 0.8949778    | 0.1603502  |            | 0.04793386 | 0.1664175  | 0.07483009 | 1.884976   |            |            |
| 0.4416202    | 0.2969714  | 0          | 0.2350683  | 0.1307711  | 0.2922691  | 0.3553080  | 0          | 0          |
| 0            | 0.2871944  | 1.1463330  |            | 0.08592928 | 0.1982254  | 0.06997099 | 0.1036109  |            |
| 0.2707420    | 0.09742796 |            | 0.1003308  | 0.6433154  | 0.8767493  | 0.2784375  |            |            |
| 0.08606655   | 0.1913949  |            | 1.3119560  | 0.7217741  | 0.02539004 | 0.8673487  |            |            |
| 1.0108380    | 0.1340240  | 0.1241421  |            | 0.06610756 | 1.3801430  | 0.03973279 | 0          | 0.1051925  |
| 0.07019891   | 0.1452228  |            | 0.05768486 | 0.23294    | 0.2986567  | 0.4979805  |            |            |
| 0.3671391    | 0.5377988  |            | 0.3466842  | 1.1894050  | 0.2960311  | 0.04836415 | 0          |            |
| 0.09162868   | 1.0066110  | 0.1307710  | 0.7700602  | 0.07560009 | 0.3400562  | 0.2147298  |            |            |

|              |            |            |            |            |            |            |            |   |   |   |
|--------------|------------|------------|------------|------------|------------|------------|------------|---|---|---|
| 0.2727452    | 0.07858469 | 0.09867704 | 0.8163282  | 0.4106529  | 0.2657028  |            |            |   |   |   |
| 0.4250144    | 0.2025476  | 0.1152195  | 0          | 0.3046805  | 0.4445352  | 0          |            |   |   |   |
| 0.07763352   | 0.1065967  | 0.1456153  | 0.5856268  | 0.8832404  | 0.6916487  |            |            |   |   |   |
| 1.5407520    | 0.08984602 | 0.2814925  | 0.4757409  | 0.05102051 | 0.2350683  | 0          |            |   |   |   |
| 0.0158814    | 0.2690296  | 0.07763352 | 0.1194627  | 0          | 0.1022347  | 0.1722707  |            |   |   |   |
| 0.3695876    | 0.1472067  | 0          | 0          | 0.6845954  | 0          | 0.08281227 | 0          | 0 | 0 | 0 |
| 2.1528980    | 0.1386812  | 0.04715081 | 0          | 0.3459481  | 0.07918195 | 0.2064783  |            |   |   |   |
| 0.6306091    | 0.03388532 | 0          | 0.6181531  | 0.04836415 | 0.2335737  | 1.1582950  |            |   |   |   |
| 0.9996832    | 6.7547630  | 0.2366880  | 0.1515120  | 0.5035295  | 0.09345648 | 0.03611103 |            |   |   |   |
| 0.9033813    | 0          | 0.2646251  |            |            |            |            |            |   |   |   |
| TCGA-R3-A69X | 433        | 0          | 0.03984392 | 0.1988390  | 0.1474199  | 0.6726033  |            |   |   |   |
| 20.201490    | 0.3701797  | 0.2123648  | 0.2423796  | 0.2742654  | 0.05249587 |            |            |   |   |   |
| 1.8761450    | 0.2136056  | 0.4923632  | 0.1148347  | 0.2684023  | 0.1886433  |            |            |   |   |   |
| 0.03114934   | 1.4464590  | 0.03165192 | 0.08718932 | 0.1091762  | 2.2149281  | 5.73125    |            |   |   |   |
| 0.06114576   | 0.1856161  | 0          | 0.2383911  | 3.1948660  | 0.8647757  | 0.2640125  |            |   |   |   |
| 0.1328599    | 0.4280203  | 0.2815081  | 0.4669751  | 0.02832014 | 0.3068496  |            |            |   |   |   |
| 0.1551420    | 0.2745034  | 0.0555907  | 0.2059472  | 0.1961760  | 0.03430399 | 0.3379475  |            |   |   |   |
| 2.2515520    | 0.2106588  | 0.1750734  | 0.2721040  | 0.2140102  | 0.2769543  | 2.168261   |            |   |   |   |
| 0.07066752   | 0.6482336  | 0.3170125  | 0.1416007  | 0.1773899  | 0          | 0.439158   |            |   |   |   |
| 0.3051626    | 0.04708223 | 0.04473371 | 0.1186324  | 0.3138816  | 0.8392316  |            |            |   |   |   |
| 0.1239705    | 0.1194475  | 0.5856383  | 1.3298850  | 0.0294448  | 0.1708199  |            |            |   |   |   |
| 1.0974720    | 0.4083539  | 0.9657894  | 1.5490260  | 0.1255526  | 0.3822365  | 0.6153816  |            |   |   |   |
| 0.03020512   | 0.3355202  | 0.03003651 | 0.2755073  | 0.05049033 | 0.455828   |            |            |   |   |   |
| 0.08126383   | 0.07728958 | 0.2079196  | 0          | 0.06860799 | 0.5794736  | 0          | 0          |   |   |   |
| 0.0539183    | 0.04152788 | 0.4336254  | 0.3987038  | 0.6505909  | 0.2128011  |            |            |   |   |   |
| 1.3499050    | 0.9772745  | 0.09052775 | 0.02725455 | 0.04094107 | 4.7162441  | 2.32058    |            |   |   |   |
| 0.1816678    | 0.3794173  | 0.2228423  | 0.2569790  | 0.06007302 | 0.9446340  | 0.2622966  |            |   |   |   |
| 0.03907239   | 0          | 1.2574310  | 0.2220860  | 0.03291642 | 0.04473371 | 0.195362   |            |   |   |   |
| 0.1424037    | 0.6803098  | 0.4392512  | 0          | 0.03144056 | 0.1333     | 1.288566   |            |   |   |   |
| 0.06431267   | 0.8743348  | 0          | 0.8968044  | 0.1401257  | 7.3387960  | 1.090708   | 0          |   |   |   |
| 0.7989712    | 0.1543680  | 0.09149014 | 0          | 0.3944061  | 0.09142181 | 0.1042411  |            |   |   |   |
| 0.6316623    | 0.1118786  | 0.05803665 | 0.1319292  | 0.1620034  | 0          | 0.2914181  |            |   |   |   |
| 0            | 0.2402921  | 0.2633002  | 0.1956664  | 0.5070394  | 0.1419565  | 0.1362235  |            |   |   |   |
| 0            | 0.5621759  | 1.2423450  | 0.07299571 | 0.2406760  | 0.1672548  | 0.4891661  |            |   |   |   |
| 0.3027547    | 1.8755980  | 0.2140102  | 0.7773427  | 0          | 0.1518782  | 0.1386471  |            |   |   |   |
| 0.2730724    | 0.05555426 | 0          | 0.1337089  | 0.1226899  | 1.1167750  | 0.1245308  |            |   |   |   |
| 0.2923065    | 0.4217818  | 0.03208329 | 0.2392564  | 0.0921675  | 0.3469217  |            |            |   |   |   |
| 0.3725188    | 0.0676226  | 0.08625753 | 1.2811490  | 0.1340419  | 0.3199763  |            |            |   |   |   |
| 1.3597920    | 0.0176173  | 0.4729892  | 0.4776458  | 1.2760610  | 0.06592611 | 0.1724624  |            |   |   |   |
| 0.2219365    | 0.5167562  | 0.06591213 | 0.1634198  | 0.09440047 | 0.07704763 | 0          |            |   |   |   |
| 0.08875067   | 0          | 0          | 0.1085469  | 0.8132570  | 0.8483285  | 0.1637643  | 0.8232959  |   |   |   |
| 0.01239822   | 0.8163566  | 0.01046853 | 0.1771118  | 4.08531    | 0.03566836 |            |            |   |   |   |
| 0.1643359    | 0          | 1.6126620  | 0.1441933  | 0.0814102  | 0.08351616 | 0          | 0.07147208 |   |   |   |
| 0.3010854    | 0.6213378  | 0.05145599 | 0.1848376  | 0.2383911  | 0.1435799  |            |            |   |   |   |

|              |            |            |            |            |            |                     |
|--------------|------------|------------|------------|------------|------------|---------------------|
| 0.07299571   | 0.06947271 | 0.1285522  | 0          | 0.02922849 | 0.08274558 | 1.466496            |
| 0.09695183   | 0.05493843 | 0          | 0.1892753  | 0.09094196 | 0.1719899  | 0.1515449           |
| 0.07106752   | 0.06898496 | 0.1571454  | 0.0676226  | 0.02721516 | 0.9470904  |                     |
| 0.1867284    | 1.6552356  | 0.0794690  | 0.04789869 | 0.1271061  | 0          | 0.2933472           |
| 0.1715051    | 0          | 0.5431351  | 0.05575986 | 0.05549969 |            |                     |
| TCGA-5N-A9KM | 530        | 1          | 0.1254225  | 0.08382781 | 0.1705714  | 0.2610310.1202984   |
| 30.457550    | 0.1367369  | 0.2861150  | 0.09295249 | 0.9495947  | 0.3782235  |                     |
| 0.6102665    | 0.01694446 | 0.1222865  | 0.1484550  | 0.1365968  | 0.1587938  |                     |
| 1.0034890    | 0.06443808 | 3.08224530 | 0.606840   | 0.08661482 | 0.1853999  | 0.2887161           |
| 0.05628136   | 0.3969846  | 0.9300782  | 0.2077676  | 0          | 0          | 0.6978384           |
| 0.1691295    | 0.0835757  | 1.0413770  | 0.07166197 | 0.1446586  | 0.1093693  |                     |
| 0.0780787    | 0.08531686 | 0.08098775 | 0          | 1.1937690  | 0.1492023  | 0.206664            |
| 0.01946684   | 1.1999760  | 0.3677945  | 2.8919090  | 0.04170945 | 0.6443808  | 0.06929905          |
| 0            | 1.6402880  | 0.03074073 | 0.5660706  | 0.1111557  | 0.2112222  | 0.07001933          |
| 0            | 0.02714148 | 0.07944171 | 0.1410009  | 0.1819242  | 0.1012808  | 0.01390315          |
| 0.1176251    | 0.1494809  | 0.2984045  | 0.3664473  | 0.2405967  | 0.2074906  |                     |
| 0.06097404   | 0.04581041 | 0.1069662  | 0.01722009 | 0.07091272 | 0.6969008  |                     |
| 0.1788027    | 0.3681589  | 0          | 0.03041195 | 0.2727078  | 0.1993824  | 0                   |
| 0.05700291   | 0.3109250  | 0.04709987 | 0.02727747 | 0.04902125 | 0.05438614 |                     |
| 0.3322212    | 0          | 0.06279982 | 0.2430739  | 1.5862220  | 0.2468898  | 0                   |
| 0.3787246    | 3.1684560  | 0.3931551  | 0.08143273 | 0.3015479  | 0.1588970  | 0.1063691           |
| 0.4516802    | 0.03096259 | 0          | 0          | 1.2144480  | 0.1558257  | 0.7340470.005550846 |
| 0.1844908    | 0.3361987  | 0.6261794  | 0.3240690  | 0.0742275  | 0.1976998  |                     |
| 1.8200930    | 1.9003770  | 0.05052531 | 1.7922780  | 0.03308205 | 0.07911436 | 0.0343338           |
| 0            | 0.6736708  | 0.1214816  | 0.0539994  | 0.04116877 | 0.3879779  | 0.05395907          |
| 0.3691517    | 0.8284896  | 0          | 0          | 0          | 0.09480229 | 0.5160032           |
| 0.1772818    | 0.2453768  | 0.8661482  | 0.1710087  | 0          | 0.2814068  | 0                   |
| 2.3226560    | 0.5056951  | 0.0287224  | 0.1065390  | 0.1184608  | 1.2270430  | 0.215347            |
| 0.3841384    | 0.1684177  | 0.5005134  | 0          | 0.1920893  | 0          | 0.4512845           |
| 0.1311571    | 0.1197368  | 0.2367533  | 0.8400039  | 0.2596629  | 0          | 0.0339234           |
| 0.3943439    | 0.1106420  | 0.4165971  | 0.5245096  | 0.1732715  | 0.5135263  |                     |
| 0.2442982    | 0.1197368  | 0          | 0.3024644  | 0.07911436 | 0.05395907 | 0.7176636           |
| 0            | 0.3098620  | 0.2631221  | 0.3809073  | 0.1426736  | 0.2035818  | 0.3742616           |
| 0.2711114    | 0.04951255 | 0.2922842  | 0.1114343  | 0.08268205 | 0          | 0.146671            |
| 0.6603308    | 0.04455138 | 0.06406668 | 0.3748217  | 0.1201683  | 0.7249284  |                     |
| 0.6479020    | 0.1609891  | 0.7896671  | 0.0123575  | 0.09292011 | 0.3173544  | 0.084129            |
| 0.1551912    | 0          | 0.09501886 | 0.4736327  | 0.03203334 | 0          | 0                   |
| 0.2043630    | 0.1694446  | 0          | 0.1212167  | 0          | 0.08474385 | 0.0861672           |
| 0.07587419   | 0          | 0.05750423 | 0.4493112  | 1.1844460  | 0.0286115  | 0.1297032           |
| 0.3556982    | 0.3847935  | 0.00933493 | 0.1522681  | 0.3089917  | 0.6431650  |                     |
| 0.4869401    | 0          | 0          | 4.4607610  | 0.03148886 | 1.8670687  | 0.0837750.1336438   |
| 0.1250345    | 0          | 0.2770235  | 0.03856225 | 0          | 0.3727555  | 0.3510468           |
| 0.01091903   |            |            |            |            |            |                     |
| TCGA-FD-A6TF | 69         | 1          | 0.1214628  | 0.04329669 | 0          | 0.2122187           |
|              |            |            |            |            |            | 0.994137            |

|                                           |                                    |                                    |                            |                    |             |
|-------------------------------------------|------------------------------------|------------------------------------|----------------------------|--------------------|-------------|
| 29.964170.4231799                         | 0.2452222                          | 0.4187018                          | 0                          | 0.05334394         | 2.670111    |
| 0.2894085                                 | 0.9506029                          | 0.07293116                         | 0.8564939                  | 0.09584543         | 0 0.3821548 |
| 0.008040814                               | 0.1328968                          | 0.05546996                         | 1.93658731.691440.0994137  | 0.1450882          |             |
| 0.3106678                                 | 0.04844845                         | 4.6988511.1326060.7154070.06750313 | 0.02899566                 |                    |             |
| 0.4290838                                 | 0.4799113                          | 0.0575553                          | 0.5456617                  | 0.1507941          | 0.4034638   |
| 0.1380836                                 | 0.08096011                         | 0.01049185                         | 0.5228726                  | 0.2497506          | 2.2103680   |
| 0.4066324                                 | 0.05865147                         | 0.3805681                          | 0.5980355                  | 3.62255 0          | 0.3466873   |
| 0.3698574                                 | 0.5036089                          | 0.8311786                          | 0 0.4197901                | 0.7973807          | 0           |
| 0.1363691                                 | 0.7232934                          | 0.4639306                          | 0.4069246                  | 0.1907595          | 0.04045906  |
| 0.4071731                                 | 1.1769990.02393638                 | 0.2386718                          | 0.5218569                  | 0.1679563          |             |
| 0.7360437                                 | 1.9054290.1275809                  | 0.3884114                          | 0.4056149                  | 0.07673271         |             |
| 0.1630585                                 | 0 0.3799432                        | 0.0513061.0970330                  | 0.05235879                 | 0.2253637          |             |
| 0.1716335                                 | 0 0.4906958                        | 0 0 0.07044345                     | 0.06329814                 | 0.3029335          |             |
| 0.2669190.6611011                         | 0.9190152.0314141.2413280.02854869 | 0.2215587                          | 0                          |                    |             |
| 3.87959 1.9673690.8922459                 | 0.2803976                          | 0.2098734                          | 0.3606088                  | 0.03052175         |             |
| 0.3159146                                 | 0.1066136                          | 0.1191108                          | 0.1021555                  | 4.4430680.08942587 |             |
| 0.5416171                                 | 0.03822649                         | 0.04545638                         | 0.4367396                  | 0.1085282          | 1.068927    |
| 0.5021406                                 | 0.07360437                         | 0 0.2014435                        | 1.2198530.02178388         | 1.452561           |             |
| 0.1304805                                 | 1.0893120.05695576                 | 7.4233020.3916094                  | 0 0.9594928                |                    |             |
| 1.0980320.1787849                         | 0.1417566                          | 0.06679629                         | 0 0.1412335                | 0.8677087          | 0           |
| 0.1179485                                 | 0.2346059                          | 0 0.04080413                       | 0.6292676                  | 0 0.09156525       |             |
| 0.3332688                                 | 0.04970685                         | 0.03680219                         | 0.09616652                 | 0.1730302          | 0.03563713  |
| 1.08539 0.5123328                         | 0.04944997                         | 0.09171152                         | 0.4078963                  | 0.7456027          |             |
| 0.09860437                                | 1.8698240.1449783                  | 0.8976143                          | 0.09520964                 | 0.1433081          |             |
| 0.1174057                                 | 1.6001570.02822587                 | 0 0.1494558                        | 0.02493438                 | 0.2751071          | 0           |
| 0.1460107                                 | 0.2545961                          | 0.8299789                          | 0.09780479                 | 0.3473165          | 0.09365646  |
| 1.2198530.3785368                         | 0.1374301                          | 0.05843401                         | 0.4556461                  | 0.1702592          |             |
| 0.1857974                                 | 0.3772723                          | 0.01790191                         | 0.2440897                  | 0.2865948          | 1.713996    |
| 0.04466076                                | 0.0700994                          | 1.2886960.1166899                  | 0.03044406                 | 0.1559956          |             |
| 0.0959255                                 | 0.09430667                         | 0 0.2344795                        | 0 0.03835098               | 0.1103005          |             |
| 0.8724888                                 | 0.1034440.3744222                  | 0.6274471                          | 0.1133866                  | 0.3456436          |             |
| 0.0212753                                 | 0.09998504                         | 2.1967570.1449783                  | 0.1001944                  | 0 1.44692          |             |
| 0.2229693                                 | 0.05515025                         | 0.1272980.04379207                 | 0.1452534                  | 0.1376772          |             |
| 0.7376466                                 | 0.1568618                          | 0 0.1730302                        | 0.04863313                 | 0 0.07059503       |             |
| 0.06531446                                | 0 0 0                              | 0.4705853                          | 0 0 0.2041295              | 0.07479618         |             |
| 0.05223237                                | 0.1903727                          | 0.1539931                          | 0.1203594                  | 0.04673293         | 0.2594866   |
| 0.3092176                                 | 0.05530964                         | 1.6456880.2168514                  | 1.5324665.8471420.05752203 |                    |             |
| 0.2152659                                 | 0.05678676                         | 0.2384690.04149423                 | 0.0256530.3850531          | 0.02833033         |             |
| 0.02819814                                |                                    |                                    |                            |                    |             |
| TCGA-XF-AAMR 2790                         | 0                                  | 0.1009660.1511596                  | 0.1220544                  | 0.2739495          |             |
| 4.36946727.838211.3836230.5577090.1105558 | 0.6486656                          | 0.1263752                          |                            |                    |             |
| 6.2428480.2525995                         | 0.26201                            | 0.1891471                          | 1.0249850.09560586         | 0.05998954         |             |
| 1.2755520.008020715                       | 0.1877999                          | 0.08299697                         | 1.87546724.995890.1208576  |                    |             |
| 0.2677423                                 | 0.5887934                          | 0.1208184                          | 19.5154 1.0908170.8474223  | 0.0336672          |             |

|              |            |             |            |            |            |            |
|--------------|------------|-------------|------------|------------|------------|------------|
| 0.2747703    | 0.9844259  | 2.4258310   | 2.224693   | 2.6048540  | 1.880214   | 0.6185888  |
| 0.2316511    | 0.2140842  | 0.1046563   | 0.1043131  | 0.2646967  | 1.373192   |            |
| 0.2775849    | 0.0253510  | 2.799876    | 0.3796168  | 0.2807254  | 5.534220   | 1.074445   |
| 1.5561930    | 5.474488   | 0.03588215  | 0.5593935  | 0.03451953 | 2.9251870  | 0.9500463  |
| 0.02386163   | 0.1360283  | 0.2404952   | 2.7621642  | 2.2791020  | 2.2728582  | 0.1008948  |
| 0.6560971    | 2.2394060  | 0.002984569 | 0.3498984  | 5.6975540  | 2.2907251  | 1.660699   |
| 2.0039640    | 1.1908931  | 0.1048735   | 0.5093520  | 0.09184909 | 0.5323121  | 0.01522273 |
| 0.3889670    | 2.2558888  | 0.5593044   | 0          | 0.2089117  | 0.3699840  | 0.08692761 |
| 0.2202612    | 0.06674581 | 0           | 0.1210160  | 0.09470988 | 4.3540860  | 0.4683179  |
| 4.4773092    | 7.7771164  | 9.571311    | 0.524910   | 1.1044169  | 0.04143843 | 0.06224773 |
| 17.934840    | 0.9812258  | 0.4910432   | 2.3949030  | 6.555922   | 0.4093223  | 0.4110137  |
| 0.7332716    | 0.1994008  | 0.6930763   | 0.06793346 | 2.19667    | 0.1115029  |            |
| 0.3151536    | 0.02859821 | 0.04534276  | 0.2376262  | 0.2706423  | 0.8885457  |            |
| 0.3617506    | 0.5506530  | 1.274745    | 0.2459783  | 2.0317270  | 0.4345886  | 0.4782876  |
| 0.1518467    | 1.1796050  | 0.04261005  | 24.880630  | 0.08475945 | 0.02651292 | 1.083305   |
| 0.2086263    | 0.4208777  | 0.3004798   | 0.1166013  | 0.4633326  | 0.316981   |            |
| 1.1145310    | 0.07353352 | 0.4011762   | 0.6568362  | 0.2238618  | 0.3323089  |            |
| 0.03840906   | 0.1065591  | 0.3324357   | 0.7685304  | 0.8076243  | 0.1678708  |            |
| 0.2071172    | 0.01777402 | 0.8547449   | 3.5489740  | 2.219686   | 0.1372234  |            |
| 0.4407832    | 0.9606630  | 3.088438    | 6.5460180  | 7.773106   | 0.8058336  | 0          |
| 0.4563399    | 0.1639572  | 0.3275352   | 0.07038828 | 0.1713582  | 0.2439527  |            |
| 0.4663510    | 7.460779   | 0.04087645  | 0.7622127  | 1.2909620  | 3.257329   | 0.2276407  |
| 0.3118035    | 0.08650219 | 0.3739717   | 1.0908170  | 5.312104   | 0.1165759  |            |
| 0.9739440    | 1.358669   | 0.3011662   | 1.0372580  | 0.02678574 | 0.4292269  | 0.6708922  |
| 4.80206      | 0.1837652  | 0.1048863   | 0.4097451  | 0.4510430  | 1.305822   | 0.2735648  |
| 0.09568573   | 0.1135951  | 0           | 0.5217623  | 0.1260020  | 0.01912756 | 0.2200496  |
| 1.8760881    | 2.210270   | 0.3734864   | 0.8345050  | 1.068197   | 0.6206035  | 0.08488851 |
| 0.2992054    | 13.824640  | 0.09038496  | 0.09994399 | 0          | 1.6782270  | 1.938162   |
| 0.0962717    | 0.1693065  | 0.06552392  | 0.1086678  | 0.6370730  | 3.408804   |            |
| 0.9127399    | 0.2602141  | 1.1218850   | 0.02425578 | 0.07398955 | 0.08508911 | 0.1845951  |
| 0.1503095    | 0.02962644 | 0.4696841   | 1.8580780  | 1.719757   | 0.05568641 |            |
| 0.2036192    | 0.2398154  | 0.1522976   | 0.4498376  | 0.6074504  | 0.2040995  |            |
| 0.03496209   | 0.3086145  | 0.1713582   | 0.1241356  | 1.3511790  | 1.081547   |            |
| 1.50999410   | 4.25780    | 1.522730    | 1.395731   | 0.4248361  | 0.2676070  | 0.09105912 |
| 0.02558888   | 0.7809842  | 0.08242359  | 0.0984468  |            |            |            |
| TCGA-XF-A8HF | 2954       | 1           | 0.01524397 | 0.04890486 | 0.05528375 | 0.05640169 |
| 0.04678777   | 145.51010  | 1.593313    | 0.06647652 | 0.5285753  | 0.1049318  |            |
| 0.03012676   | 0.5497382  | 0.1225857   | 1.5823440  | 0.04942671 | 0.1864609  |            |
| 0.07217345   | 0.6006416  | 0.03320422  | 0.1271526  | 0.1501108  | 0.1879648  |            |
| 4.56432473   | 8.43080    | 1.684360    | 1.311051   | 0.8421798  | 0.1641718  | 0          |
| 0.8080728    | 0          | 0           | 0.2907975  | 0.1096329  | 0.03250519 | 0.6163407  |
| 0.06967892   | 0.4332192  | 0.02126856  | 0.06901644 | 0.08295594 | 0.3937331  | 0          |
| 9.9209970    | 0.05741288 | 0.0378563   | 0.7369073  | 0          | 4.5830460  | 0.04055525 |
| 0.2349560    | 1.1212865  | 0           | 0.6560571  | 0.05539    | 0.05298693 | 1.1508490  |
|              |            |             |            |            |            | 0.1026886  |

|              |             |            |            |             |             |            |             |
|--------------|-------------|------------|------------|-------------|-------------|------------|-------------|
| 0.8510216    | 0.09825431  | 0.01979281 | 0.06098161 | 0.04569968  | 0.2476459   |            |             |
| 0.1477172    | 0.01351842  | 0.2369095  | 0.02422407 | 0.1339140   | 0.03958965  |            |             |
| 3.5090820    | 0.1152851   | 0.1067161  | 0.08908545 | 0.3986903   | 0.06697428  |            |             |
| 0.1379008    | 0.4517440   | 0.3855074  | 0          | 0.05914076  | 0.1803097   | 0          |             |
| 0.03937331   | 0.05542551  | 0          | 0          | 0.008840879 | 0.07149707  | 0.0777664  |             |
| 0.06460557   | 0           | 0.1221240  | 0.2593257  | 3.15476     | 0.1289863   | 0          | 0.1472978   |
| 0.8585774    | 0.7297989   | 0.1187689  | 0.01871511 | 0.3511363   | 0           | 0.2058662  |             |
| 0            | 0           | 0          | 3.5425230  | 0.4588291   | 0.1025476   | 0.05134429 | 0.3139246   |
| 0.1634476    | 0.3130253   | 0.1890608  | 0          | 0           | 0.06669167  | 1.8834950  | 0.01230276  |
| 0.3982304    | 0           | 0.8521902  | 0.03216659 | 0.5000130   | 0.01669185  | 0          | 0.9289498   |
| 0            | 0.06058281  | 0.08005907 | 0.1508967  | 0           | 0.4387001   | 0.8592675  |             |
| 0.1712154    | 0.1332262   | 0.1135689  | 0          | 0.09217888  | 2.1323280   | 0.04349285 | 0           |
| 0.3287193    | 0.05614532  | 0.2078457  | 0.05431143 | 0.5472392   | 0           | 1.806706   |             |
| 0.3101501    | 0.1954931   | 0.03453027 | 0.07678845 | 0.3509082   | 0.3831351   |            |             |
| 0.3191799    | 0.08187859  | 0.0811105  | 0          | 0.02490317  | 0.05304527  | 0.7522225  |             |
| 0.1275277    | 0.3104625   | 0.09975411 | 0          | 0.1942134   | 0.04628683  | 0.03298466 |             |
| 0.09585786   | 0.5609542   | 0.1472978  | 0.0392304  | 0.1723947   | 0.5372385   |            |             |
| 0.04750758   | 0           | 0.1320058  | 0.2940945  | 0           | 0.1049318   | 0.8682601  |             |
| 0.04044144   | 0.3297107   | 0.3498233  | 0.4377061  | 0.02522281  | 0.1583586   |            |             |
| 2.2926010    | 0.1977068   | 0.05501991 | 0.1932533  | 0           | 0.08039404  | 0          | 0.2648514   |
| 0.4993783    | 0           | 0          | 0.3123853  | 0.03894765  | 1.0338060   | 0.5118531  | 0.1707646   |
| 0.5335665    | 0.01201554  | 0.1129360  | 0.6394122  | 0           | 0           | 0          | 0.07964609  |
| 0.2086759    | 0.0311469   | 0          | 0.1483932  | 0.08203396  | 0.09503414  | 0.4895598  |             |
| 0.3543598    | 0           | 0          | 0.08239879 | 0           | 0.08638405  | 0.04918304 | 0.01118259  |
| 0.2374335    | 0.08858995  | 0.02781975 | 0.01261141 | 0           | 0.2534533   | 0.04992136 |             |
| 0.0634519    | 0.1106888   | 0.02718987 | 0.1055724  | 0.1521853   | 0           | 0.03123692 |             |
| 0.7011459    | 0.03061749  | 0.7599357  | 2.2787510  | 0.03498535  | 0.4133533   | 0          |             |
| 0.0673394    | 0.04686892  | 0          | 0.2899524  | 0.01066664  | 0.1061687   |            |             |
| TCGA-ZF-AA4U | 262         | 1          | 0.2503781  | 0.1427999   | 0           | 0.2007162  | 0.69.561550 |
| 0.1698447    | 0.3046213   | 0.1148984  | 0.03298826 | 0.02327997  | 0.4474306   |            |             |
| 0.7425593    | 0.02706068  | 0.03254905 | 0.03951432 | 0.1565933   | 0.03635803  |            |             |
| 0.01988998   | 0           | 0.06860602 | 1.3654515  | 7.780970    | 0.06147812  | 0.1256130  | 0.2305430   |
| 0            | 0.8936284   | 0          | 0.1252332  | 0           | 0.3537979   | 0.3267920  | 0.0533889   |
| 0.3856469    | 0.09325209  | 0.04312429 | 0.06210319 | 0.03778588  | 0.06488234  |            |             |
| 0.04311307   | 0           | 6.95444    | 0.2647548  | 0.1257321   | 0.03108898  | 1.344834   |             |
| 0.3480747    | 5.3156330   | 0.1776291  | 0.3859089  | 0.01475628  | 0           | 0.6935993  |             |
| 1.2840370    | 0.005950742 | 0.4383162  | 0          | 0           | 0.2236448   | 0          | 0.002408086 |
| 0.1513539    | 0           | 0.5810739  | 0          | 0.01480242  | 0.4114806   | 0.1503079  |             |
| 0.07331671   | 0.4768495   | 0.7684765  | 0          | 0           | 0.006967641 | 0.2277698  | 0           |
| 0.07549945   | 0.07419773  | 0.2538239  | 0.09045507 | 0           | 0.09713712  | 0.1103318  |             |
| 0.1061394    | 0           | 0.4855195  | 0.08275901 | 0           | 0.03872242  | 0          | 0.006812225 |
| 0.4067662    | 0           | 0.1337236  | 0.3378729  | 1.2026450   | 0.0117698   | 0          | 0           |
| 0.8295237    | 0.6088509   | 0.1300499  | 0.1571108  | 0.2768313   | 0.03774972  |            |             |
| 0.9016791    | 0.09889587  | 0          | 0.1684632  | 1.40075     | 0.05530158  | 0.3907631  | 0           |



|              |            |             |            |            |             |            |            |
|--------------|------------|-------------|------------|------------|-------------|------------|------------|
| 0            | 0.09821194 | 0.1342292   | 0.01883281 | 0.2070182  | 0           | 0          | 0.2104873  |
| 1.32879      | 0.06735651 | 0.4534974   | 0.1075867  | 0.6552901  | 0.03522184  | 0          |            |
| 0.1553569    | 0          | 0.5998774   | 0.1940088  | 0.1724765  | 0.04383162  | 0.08261458 |            |
| 0.05744922   | 0.4803687  | 0.8526748   | 0.04686946 | 0.03647007 | 0           | 0          |            |
| 0.05046712   | 0.5035974  | 0           | 0.03774972 | 0.2322205  | 0           | 0.09103491 |            |
| 0.05947004   | 0.08560245 | 0           | 0.2826158  | 0.7206333  | 0           | 0.1512401  |            |
| 0.2942869    | 0.4610859  | 0.3707440   | 0.02230827 | 0.2241390  | 0.5328873   | 0.0588783  |            |
| 0.05453704   | 0.02904181 | 0.2287973   | 0.03491014 | 0.04249385 | 0.008402228 |            |            |
| 0.04625878   | 0          | 0.1520497   | 0.09631364 | 0.4198506  | 0.4711939   | 0.2822548  |            |
| 0.1288697    | 0.1072552  | 0.3737223   | 0.1560598  | 0.3399508  | 0           | 0          |            |
| 0.4211580    | 0.2566386  | 0           | 0.5415410  | 0.6346057  | 0.03686772  | 0.1380926  |            |
| 0.1300499    | 0          | 0.1804046   | 0.06777655 | 0.2365041  | 0.1779630   | 0.07482553 | 0          |
| 0.3123158    | 0          | 0           | 0.05497334 | 0          | 0.9776358   | 0.1724523  | 0.06232805 |
| 0.2992478    | 0.05262719 | 0.09893031  | 0.04876631 | 0          | 0.04130729  | 0          | 0          |
| 0.2678924    | 0.0341053  | 0.1049626   | 0.05416265 | 0          | 0.7095047   | 0.7499675  |            |
| 0            | 0.07743428 | 0           | 0.1203003  | 0          | 0.07276077  | 0.08078183 | 0          |
| 0.4575744    | 0.4365199  | 0.06092427  | 0.01380926 | 0.06311754 | 0.07929339  |            |            |
| 0.02981618   | 0.1582570  | 0.5540676   | 0.3274967  | 0          | 0.5554673   | 0          | 0.03420387 |
| 0.2678171    | 0          | 1.4330893   | 0.7075450  | 0.1915417  | 0           | 0          | 0.01026413 |
| 0.03172799   | 0.2539941  | 0.005839891 | 0.0697517  |            |             |            |            |
| TCGA-DK-A3IQ | 539        | 1           | 0.1126734  | 0.0535515  | 0.04540236  | 0.1968621  | 0.248811   |
| 27.503040    | 0.1308525  |             | 0.2456754  | 0.1370836  | 0.4308816   | 0.06185478 |            |
| 6.0662710    | 0.1006748  |             | 0.2552621  | 0.09471513 | 0.8255862   | 0.08890979 |            |
| 0.005872419  | 3.2723170  | 0.02237688  | 0.12328    | 0.1543681  | 0.2702461   | 0.951510   | 0.0288187  |
| 0.3499320    | 0.1729122  |             | 0.1797703  | 7.5288870  | 0.6883553   | 1.9909150  | 0.09392763 |
| 0.8069237    | 0.3449629  |             | 1.0504330  | 0.1067809  | 0.4700207   | 0.1653153  |            |
| 0.2125473    | 0.1397362  |             | 0.1742924  | 0.09732633 | 0           | 0.2606377  | 1.49285    |
| 0.03971437   | 0.07072638 |             | 0.05440729 | 0.6556255  | 0.06526589  | 3.158682   |            |
| 0.09991926   | 1.25424    | 1.3613061   | 0.0010710  | 0.2786864  | 0           | 0.4686345  | 0.4931201  |
| 0.04438081   | 0.1265011  |             | 0.08386924 | 0.4303593  | 1.3365260   | 0.1001636  |            |
| 0.07506267   | 0.3486544  |             | 1.4153330  | 0.03330642 | 0.1945644   | 0.9947136  |            |
| 0.1466377    | 1.0079162  | 0.0365220   | 0.04733953 | 0.4674226  | 0.5173623   | 0.1423602  |            |
| 0.2750166    | 0          | 0.1112998   | 0.1903734  | 0.5653606  | 0           | 0.07285495 |            |
| 0.1437259    | 0.1592137  | 0           | 0.04551877 | 0.1862132  | 0.03761085  | 0.05808531 |            |
| 0.03914514   | 0.3014497  |             | 0.3846705  | 2.2271090  | 0.7522172   | 0.3561930  | 0.6717095  |
| 1.0534280    | 0.0385924  | 0.5061260   | 0.2488643  | 0.7705992  | 0.9428889   | 0.2715362  |            |
| 0.3114442    | 0.1132525  |             | 0.42831    | 0.09889873 | 0.1104916   | 0.06317552 |            |
| 1.3738520    | 0.3349495  |             | 0.03989286 | 0.1265011  | 0.1473222   | 0.2013496  |            |
| 2.9719040    | 0.3622923  |             | 0.6145035  | 0.0296366  | 0.1256516   | 0.5086923  |            |
| 0.04041508   | 0.8895784  | 0           | 0.7077338  | 0.02641715 | 6.0964380   | 0.2330421  | 0          |
| 0.5086065    | 1.1640870  | 0.1857493   | 0.1314987  | 0.1239255  | 0.08617632  |            |            |
| 0.5895605    | 0.6395246  | 0           | 0.8206004  | 0.4041685  | 0.5344785   | 0.1514057  |            |
| 0.3777090    | 0.1071569  |             | 0.1698787  | 0.2525471  | 0.04610993  | 0.2389736  |            |
| 0.08920765   | 0          | 0.03305833  | 0.5299201  | 0.8169485  | 0           | 0.1417917  |            |

|              |            |            |            |            |             |            |
|--------------|------------|------------|------------|------------|-------------|------------|
| 0.2207216    | 0.2881870  | 0.1097629  | 4.1940770  | 0.2689746  | 0.9658862   | 0          |
| 0.1636159    | 0.10891    | 0.2917250  | 0.1309168  | 0.03187131 | 0.3213945   | 0.04626012 |
| 0.7974987    | 0.03801354 | 0.2438010  | 0.3936213  | 0.3092299  | 0.1512123   |            |
| 0.2899653    | 0.05148399 | 0.4412127  | 0.1950805  | 0.1912279  | 0.05420556  |            |
| 1.0264950    | 0.2211143  | 1.2064680  | 0.3762197  | 0.01660648 | 0.2100867   | 0.351616   |
| 3.4426230    | 0.1035725  | 0          | 0.4034619  | 0.1894303  | 0.0621303   | 0.1447073  |
| 0.08898407   | 0.04291589 | 0.03125409 | 0.2007803  | 0.1171770  | 0.1778790   | 0.1023189  |
| 2.0539250    | 0.3198617  | 0.1543680  | 0.3880289  | 0.05843424 | 0.3954461   | 0.0592073  |
| 0.3524494    | 4.5954870  | 0.1008655  | 0.06196273 | 0          | 2.1847      | 0.2659303  |
| 0.1023189    | 0.07872427 | 0.04062316 | 0.1347425  | 0.6243822  | 0.3498661   |            |
| 0.3395253    | 0.1742322  | 0.2247129  | 0.1353417  | 0          | 0.04911494  | 0.1009802  |
| 0.1397821    | 0.01836764 | 0          | 0.8730650  | 0.02284726 | 0.06214348  | 0.6627534  |
| 0.1189435    | 0.1863565  | 0.4197793  | 0.2597267  | 0.04465993 | 0.02167561  |            |
| 0.1573869    | 0.1274853  | 0.02565364 | 0.6026059  | 0.8549277  | 1.24821     |            |
| 10.731750    | 0.04515041 | 0.4792528  | 0          | 0.1106064  | 0.02309495  | 0          |
| 0.004380045  | 0.02615765 |            |            |            |             |            |
| TCGA-E7-A4XJ | 68         | 1          | 0          | 0.2369277  | 0           | 0.1676745  |
|              |            |            |            |            | 0.06181939  | 72.044420  |
| 0.1903061    | 1.0659670  | 0.09951413 | 0.1886112  | 0.2699485  | 1.306692    |            |
| 0.03265307   | 0.02856413 | 0.04768039 | 0          | 0          | 0.08400164  | 0.0661124  |
|              |            |            |            |            | 0           |            |
| 2.76275      | 138.00470  | 0.1020020  | 0.02165319 | 0.2781872  | 0.4338312   | 0          |
|              |            |            |            |            |             | 4.4880870  |
| 0.05037135   | 0.04327357 | 0          | 0.3138523  | 0.0429482  | 0.2908407   | 0.1841297  |
| 0.1709768    | 0.09367188 | 0.07295161 | 0.2192148  | 0.2080915  | 0           | 39.35396   |
| 0.2555754    | 0          | 0.02500924 | 1.0547930  | 9.5486550  | 0.1071691   | 0.4139211  |
| 0.1602525    | 0          | 1.9428950  | 0.03231238 | 3.8345190  | 0           | 2.8335670  |
| 0.02615169   | 0.1880044  | 0.1207635  | 0.2337198  | 0.2602329  | 0           | 0.1187325  |
| 0.04267547   | 0.01474474 | 0.6800132  | 4.8837310  | 0.04700037 | 0.008407582 |            |
| 0.2977444    | 0          | 0.2733068  | 0.3879699  | 0.1531397  | 0.1455315   | 0          |
|              |            |            |            |            | 0           |            |
| 0.08408407   | 0.5122970  | 0.2196966  | 0          | 0          | 0.05840604  | 0          |
|              |            |            |            |            |             | 0.01233007 |
| 0.2418578    | 0          | 0          | 0.1561397  | 1.2350510  | 0.08266442  | 0.3725290  |
| 2.2688291    | 7.448570   | 0.02472775 | 0.4082731  | 0          | 0.4714758   | 0.03977793 |
|              |            |            |            |            |             | 0          |
| 0            | 2.7303720  | 0.06673027 | 0.8756774  | 0.0570498  | 0           | 0.2370171  |
|              |            |            |            |            |             | 0.2699485  |
| 0.1090791    | 0.6661354  | 0          | 0.04768039 | 0.1244017  | 1.2526560   | 0.03251059 |
| 0.6734987    | 0          | 0.1960968  | 0          | 0.3049170  | 0.3638990   | 1.0385660  |
|              |            |            |            |            |             | 0.3901715  |
| 0.06937355   | 0          | 0          | 0.1386435  | 0.5269475  | 1.8981240   | 0          |
|              |            |            |            |            | 0           |            |
| 0.5480704    | 2.4859280  | 0.04555113 | 0.1611216  | 0          | 0.1647724   | 0          |
| 0.6714055    | 0          | 0.08525539 | 1.1294290  | 0.7379989  | 0.4106150   | 0.2029169  |
| 1.3909360    | 0.1530450  | 0.1076741  | 0.1622759  | 0.4822608  | 0           | 0.0493558  |
|              |            |            |            |            |             | 0          |
| 0.9524787    | 0.04212471 | 0.05127568 | 0.09124778 | 0          | 0.02566088  | 0          |
| 0.1016907    | 0.6965989  | 0.4264285  | 0.09731024 | 0.2073362  | 0.1449512   |            |
| 2.6723330    | 0          | 0.3488312  | 0          | 0.4573755  | 0           | 0.4645137  |
|              |            |            |            |            |             | 0          |
| 0.2690487    | 0          | 0.06665241 | 0.1569261  | 0.2884905  | 0           | 0.07269629 |
| 0.3004003    | 0          | 0.07170014 | 0          | 0.5652890  | 0.2827778   | 0          |
|              |            |            |            |            |             | 0.4115354  |
| 0.09335924   | 0          | 1.2417630  | 0.05202287 | 0.2068243  | 0.2407271   | 0          |
|              |            |            |            |            |             | 0          |
| 1.1852950    | 0.3245518  | 0.1495317  | 0          | 0.04209367 | 0.3517778   | 0.1234606  |
|              |            |            |            |            |             | 0          |

|              |            |             |            |            |            |            |            |            |           |
|--------------|------------|-------------|------------|------------|------------|------------|------------|------------|-----------|
|              | 0          | 0.1083892   | 0.1826414  | 0.2985424  | 0          | 0          | 0          | 0.1088712  | 0.1106998 |
|              | 0.02633928 | 0.0974763   | 0          | 0.01477525 | 0          | 0.4096801  | 0.2205448  |            |           |
|              | 0.1666310  | 0.4569689   | 0.1913605  | 0.02998169 | 0.1816474  | 0.3342860  | 0.6466541  |            |           |
|              | 0          | 0.1414995   | 0.05127568 | 0.2476349  | 0.5745146  | 0          | 0.2231293  |            |           |
|              | 3.6572480  | 0.2113151   | 0.1285064  | 0.08474942 | 0.2669211  | 0          | 0.07656986 |            |           |
|              | 0.6321250  | 0.3366667   |            |            |            |            |            |            |           |
| TCGA-XF-A9T6 | 64         | 0           | 0          | 0.0180413  | 0.1223671  | 0.09363119 | 0.02589044 |            |           |
|              | 118.35530  | 0.6130899   | 0.4926182  | 0          | 0.01667092 | 0.1344542  | 0.2261131  |            |           |
|              | 1.56358    | 0           | 0.2691648  | 0.03993785 | 0.1820125  | 0          | 0.2211348  | 0.2215071  |           |
|              | 0.06934136 | 2.763985    | 101.37030  | 0.1553427  | 0.1269594  | 2.6408250  | 0.06056397 | 0          |           |
|              | 1.0984950  | 0           | 0          | 0.2860720  | 0.03370354 | 0.1079223  | 0.9744509  | 0.1285249  |           |
|              | 0.03113322 | 0.4629201   | 0.0821104  | 0.01311555 | 0.3050262  | 0          | 1.623937   |            |           |
|              | 0.1070370  | 0.09530984  | 0.05237034 | 0.1359248  | 0.4837325  | 8.1769510  |            |            |           |
|              | 0.5633986  | 0.1193156   | 0          | 1.7275470  | 0.01052542 | 0.6091446  | 0.1196138  |            |           |
|              | 0          | 0.2260419   | 0          | 0.00730169 | 0.08548667 | 0.05057668 | 0          | 0.1089876  |           |
|              | 0.1047276  | 0.009041107 | 0          | 0.2593589  | 0.0438146  | 1.9158930  | 0.06379405 |            |           |
|              | 0.01312275 | 0           | 0.03836852 | 0.01853042 | 0.1144630  | 0.6249417  | 0          | 0.3656984  |           |
|              | 0          | 0.03272609  | 0.09390685 | 0.5363850  | 0.04357517 | 0.3680426  | 0          | 0          |           |
|              | 0.02935309 | 0           | 0.00344262 | 0.1966255  | 0          | 0          | 0.1743801  | 0.6982862  |           |
|              | 0.1387862  | 0           | 0.1560181  | 0          | 0.2235773  | 0.9230651  | 0          | 0.05523295 |           |
|              | 0.3886090  | 0.5012390   | 0.0496323  | 0.04256721 | 6.1712760  | 0.05589432 |            |            |           |
|              | 0.1692649  | 0.0238929   | 0.05682368 | 1.1415430  | 0.2261131  | 0.04949013 |            |            |           |
|              | 0.1394914  | 0.09201065  | 0          | 0.04775871 | 2.1964180  | 0.01361569 | 1.427962   |            |           |
|              | 0.1631098  | 1.31403     | 0          | 0.08513441 | 0.2586245  | 0          | 1.3048780  | 0.6536276  |           |
|              | 0.03128912 | 0.04430143  | 0.04175003 | 0          | 0.2206898  | 1.2778620  | 0          | 0          | 0         |
|              | 0.1020161  | 1.5269850   | 0.1526174  | 0.4283449  | 0          | 0.5980692  | 0          |            |           |
|              | 0.2595599  | 0.04454892  | 0.4284675  | 0.21767    | 0          | 0.1528611  | 0.2549496  |            |           |
|              | 0.3883567  | 0.1331234   | 0.03006317 | 0          | 0.04488325 | 0.05950938 | 0.0137804  |            |           |
|              | 0.1174124  | 1.0174980   | 0.1058530  | 0.04294932 | 0.1698457  | 0          | 0.1074698  | 0          |           |
|              | 0.06084122 | 0.4773945   | 0.1615829  | 0.08150858 | 0          | 0.04769811 | 1.056239   |            |           |
|              | 0.4206201  | 0           | 0          | 0.4882198  | 0.1277016  | 0          | 1.1495660  | 0.02237864 |           |
|              | 0.2327791  | 0.05778447  | 0.01863144 | 0.02791455 | 0.1752584  | 1.006851   |            |            |           |
|              | 0.1823382  | 0.07611444  | 0.09435749 | 0          | 0.1912932  | 0          | 0.2705686  |            |           |
|              | 0.2368591  | 0           | 0.0689417  | 0.04938894 | 0.1724164  | 0.2600301  | 0.1307255  |            |           |
|              | 0.3779766  | 0.9361710   | 0.02659563 | 0          | 0.01760322 | 0.1359248  | 0.1252501  | 0          |           |
|              | 0.5359265  | 0.2707637   | 0          | 0          | 0          | 0.1815770  | 0.08605313 | 0.46366    | 0         |
|              | 0.4956735  | 0.1297799   | 0.09119226 | 0          | 0.02941626 | 0.05443179 | 0.09418413 |            |           |
|              | 0.04950392 | 0           | 0.09804414 | 0.03078864 | 0.04187183 | 2.9345260  | 0.2938587  |            |           |
|              | 0.2159729  | 0.0546182   | 0.1400016  | 0.3310069  | 0          | 0.1309982  | 0.1717973  |            |           |
|              | 0.1382819  | 1.5158510   | 1.4484492  | 0.3509570  | 0.04425021 | 0.3498268  | 0          |            |           |
|              | 0.07452576 | 0.04149656  | 0          | 0.6899256  | 0.06492733 | 0.1527485  |            |            |           |
| TCGA-4Z-AA7M | 495        | 0           | 0.1451080  | 0.4073364  | 0.2631242  | 0.5872234  | 0.02783592 |            |           |
|              | 23.874210  | 0.2504804   | 0.6620434  | 0.2497125  | 0.07169446 | 0.3794633  |            |            |           |
|              | 0.6806908  | 1.7819350   | 0.06861384 | 0.06430901 | 0.04293888 | 0.5870680  | 0.1185271  |            |           |

|              |             |             |              |             |             |             |
|--------------|-------------|-------------|--------------|-------------|-------------|-------------|
| 0.06484131   | 0.4167655   | 0.1491037   | 11.0751463   | 4.26150     | 12.52616    | 0.01949991  |
| 0.3340310    | 1.302298    | 0           | 1.2597740    | 2.403774    | 0.1814489   | 0.03897028  |
| 1.4993950    | 0.3696083   | 0.5994977   | 1.3619760    | 0.6632765   | 0.1338906   | 0.06748544  |
| 0.1621895    | 0.4653359   | 0.5153447   | 0.04195822   | 7.2705041   | 4.4385      | 0.61483     |
| 0.1238723    | 1.3152470   | 4.728012    | 3.0227610    | 0.6755824   | 1.4910370   | 0.06414062  |
| 1.7093090    | 0.4185958   | 0.05981485  | 3.4532       | 0           | 0.2443742   | 2.5517860   |
| 0.02616786   | 0.6723968   | 0.1631314   | 0.7998156    | 0.05858858  | 0.0160853   |             |
| 0.7484769    | 0.2401979   | 0.5842525   | 2.4966687    | 2.9301      | 0.3772323   | 0.08465295  |
| 0            | 0.5568969   | 0           | 0.2461281    | 0.4837690   | 8.274655    | 0.9174151   |
| 0.6333337    | 0.05679183  | 0.1153381   | 0.4216457    | 2.30824     | 0           | 0.05449235  |
| 0.2945484    | 0.02835765  | 0.03331177  | 0.8071653    | 0.04676434  | 0           | 0.3827787   |
| 2.864        | 0.01278985  | 0.03722198  | 0.05591388   | 0           | 3.7859452   | 8.118750    |
| 0.3562997    | 0.9693193   | 1.1075762   | 0.739610     | 2.865781    | 0.2134472   | 0.6407214   |
| 2.02953      | 0.1201887   | 0.7279355   | 0.02568828   | 0.4276549   | 0.2668090   | 7.779323    |
| 0.2087428    | 0.6748790   | 0.3864499   | 0.5041383    | 1.68461     | 0.1903045   |             |
| 0.1705847    | 1.2860192   | 5.008310    | 0.7654877    | 0.04576581  | 0.3277115   | 0.142891    |
| 0.8219187    | 0.5621942   | 0.1153381   | 0            | 0.8977447   | 0.1248562   | 0.9490918   |
| 1.59754      | 0.1527944   | 0.0396308   | 0            | 0           | 1.0419771   | 5.919780    |
| 0.1230641    | 0.8895204   | 0.2004186   | 1.5333310    | 0.2790639   | 0.1915857   |             |
| 0.84455      | 0.4995561   | 0.06646095  | 0.6984771    | 1.1877982   | 9.227710    | 7.103322    |
| 0.2747387    | 1.4613861   | 4.476770    | 0.3199053    | 0.3555814   | 0           | 0.2610576   |
| 0.1138070    | 1.385299    | 0.1095650   | 0.6702381    | 0.2310906   | 0.1652273   | 0.3270649   |
| 1.5968310    | 0.4754568   | 0.2190834   | 1.4470640    | 2.470873    | 2.5419560   | 1.69585     |
| 0.04617664   | 0.03926777  | 0           | 1.3272090    | 2.497125    | 0.9190380   | 1.7857151   |
| 0.1602516    | 0.5702303   | 0.3768555   | 0.1515511    | 0.5097028   | 0.548287    |             |
| 0.3516855    | 0.3223106   | 0.1123996   | 0.04528237   | 0.4121080   | 0.08488577  | 0           |
| 0.6670994    | 2.51562     | 0.2780582   | 1.73333      | 4.4975540   | 4.233112    | 0.8826382   |
| 0.2001587    | 0.08062817  | 0.007570386 | 0            | 0.3590979   | 0           | 0.03032617  |
| 0.8133944    | 0.8524048   | 0.1140594   | 0.2942836    | 0           | 1.7167481   | 5.43111     |
| 0.07027428   | 0.3365809   | 0           | 0.6536312    | 0.1993828   | 0.4664933   | 0.2926096   |
| 0            | 0           | 0.4068251   | 6.7463310    | 2.317152    | 0.1650667   | 0.4801139   |
| 0.1674012    | 0.8682518   | 0.9407603   | 0            | 0.03140462  | 1.8711830   | 0.2973455   |
| 0.7243358    | 0.03643114  | 3.1648134   | 0.135450     | 3.508677    | 0.02893182  | 0.3816081   |
| 1.1217610    | 0           | 0.2587564   | 0.03807607   | 0.06316401  |             |             |
| TCGA-ZF-AA56 | 259         | 1           | 0            | 0.046544244 | 0.052615233 | 0.093938612 |
| 46.052074848 | 0           | 0.147624697 | 0.185338343  | 0           | 0           | 0.589686867 |
| 0.403383452  | 0.070561358 | 0.059153493 | 0            | 0.210965676 | 0.505623497 | 0.051863587 |
| 0.047621658  | 0.178891792 | 1.13108077  | 33.343291739 | 0.180343835 | 0.421121314 |             |
| 0.267176052  | 0.05208242  | 0.091841768 | 0.776718953  | 0.04806672  | 0.072566335 |             |
| 0.124682158  | 0.430516868 | 0.06376391  | 0.046404262  | 0.125697898 | 0.07368394  |             |
| 0.053546476  | 0.047231188 | 0.096885441 | 0.045115254  | 0           | 0.302044053 | 3.043154186 |
| 0.046023615  | 0.136603958 | 0.036028995 | 0.116889523  | 0.226903192 | 3.303667044 |             |
| 0.077195332  | 0.596305972 | 0.487379757 | 0            | 0.23683738  | 0.297613831 | 0.043963979 |
| 0.285729945  | 0           | 0           | 0.032397726  | 0           | 0.043953981 | 0.1044685   |
|              |             |             |              |             | 0.130481328 |             |

|              |             |             |             |             |             |
|--------------|-------------|-------------|-------------|-------------|-------------|
| 0.202021827  | 1.218420176 | 0.006432944 | 0.085524609 | 0.092219153 | 0.201795852 |
| 0.602858785  | 1.603056315 | 0.109720299 | 0.033855002 | 0.006056095 | 0.115483474 |
| 0.015935365  | 0.032811094 | 0.042993848 | 0.110308611 | 0.052414156 | 0.266311405 |
| 0.084429095  | 0.060566897 | 0.276760844 | 0           | 0.211000575 | 0.071932014 |
| 0.033656533  | 0.02268198  | 0.032565566 | 0.163965577 | 0.074809295 | 0.11622913  |
| 0.428009139  | 1.668045084 | 0.057970073 | 0.119088602 | 0.044722948 | 0.210281663 |
| 0.672934076  | 0.396898187 | 0           | 0.112807667 | 0.240614691 | 0.032811094 |
| 0.028652585  | 0           | 0.036605972 | 1.07181248  | 0           | 0.097040359 |
| 0.048865929  | 0.170726606 | 0.15555808  | 0.851187869 | 0.119956595 | 0           |
| 0.097075582  | 1.51587255  | 0.070253464 | 0.45480964  | 0.093511618 | 0.829281329 |
| 0.030613923  | 0.21963583  | 0.230349083 | 0           | 0.83877088  | 0.281045848 |
| 0.076194652  | 0.035903239 | 0.049933388 | 0           | 0.293893658 | 0           |
| 0.044242056  | 0.08772945  | 0.159168712 | 0.041393473 | 0.328110942 | 0.383496262 |
| 0.106870421  | 0.276938254 | 0.258449197 | 0.148806915 | 0           | 0.552695535 |
| 0.186056708  | 0.098590524 | 0.146163808 | 0.667940131 | 0.347681285 | 0.116338677 |
| 0.155852697  | 0.308781329 | 0.153526538 | 0.035551652 | 0.2019392   | 0.268467382 |
| 0.030343003  | 0.036934571 | 0.138757034 | 0.1608278   | 0.665419602 | 0           |
| 0.273692542  | 0.372982708 | 0.035046944 | 0.112010287 | 0.041018328 | 0.252645425 |
| 0.452144089  | 0.110803713 | 0.062816965 | 0.139949361 | 0.292847773 | 0.299600331 |
| 0.359943686  | 0           | 0.178538948 | 0.327968285 | 0.416578238 | 0.108023923 |
| 0.554142924  | 0.188163622 | 0.065455158 | 0.183925034 | 0.051560291 | 0.107118841 |
| 0.155118236  | 0.067896225 | 0           | 0.059286905 | 0.32385185  | 0.556015028 |
| 0.262309458  | 0.094804406 | 0.842223848 | 0.022871102 | 0.128981543 | 2.001244966 |
| 0.038963174  | 0           | 0           | 0.130378763 | 0.198603237 | 0           |
| 0.148004070  | 0.707853627 | 0.05620917  | 0.112173152 | 0           | 0.026140478 |
| 0.070213502  | 0.080994315 | 0.319284367 | 0.280206168 | 0.632353157 | 0.026476906 |
| 0.658321793  | 0.11486631  | 0.073427137 | 0.093938612 | 0.18059303  | 0.025877429 |
| 0.025119116  | 0.219941277 | 0.443214852 | 0.089187382 | 0.817315528 | 0.029139598 |
| 0.723253923  | 3.614594421 | 0.047566604 | 0.277694795 | 0           | 0.128177919 |
| 0            | 0.400136905 | 0.101517671 | 0.161670381 |             |             |
| TCGA-XF-A8HH | 57          | 1           | 0.05067948  | 0.3613047   | 0.06126471  |
| 0.8555179    | 33.555530   | 0.05885627  | 0.2210051   | 0.2466358   | 0.2325680   |
| 1.7031020    | 0.5886741   | 0.7222190   | 0.1551930   | 0.3234262   | 0.03999082  |
| 0.5151506    | 0.1308439   | 0.02772512  | 0.06943334  | 4.23737     | 60.734      |
| 0.01816111   | 0.07777436  | 0.1212886   | 1.6040963   | 0.1531950   | 0.2798423   |
| 0.1451788    | 1.0383861   | 0.0056980   | 0.1620981   | 0.6342332   | 0.2402314   |
| 0.03928255   | 0.1453179   | 0.1969943   | 0.2181649   | 0.1953875   | 14.19796    |
| 0.6430739    | 0.2863088   | 0.08390368  | 0.8846833   | 0.6605102   | 4.706372    |
| 0.1348283    | 0.9113126   | 0.1642765   | 0           | 1.1030850   | 0.3191926   |
| 0.1197725    | 0.2275962   | 0.7921961   | 0.3266523   | 0.7896285   | 0.3063581   |
| 0.1012875    | 0.3528486   | 1.4732840   | 0.03745232  | 0.3168585   | 0.5011028   |
| 0.3462705    | 1.4916726   | 0.4293470   | 0.1596967   | 0.1445417   | 0.3948932   |
| 0.14844      | 0.2292297   | 0.4505549   | 0.2568847   | 0.4882446   | 0           |
| 0.1586780    | 0.1074193   | 0.2181649   | 0.4913744   | 0.0837570   | 0.1665548   |

|              |            |            |             |            |            |
|--------------|------------|------------|-------------|------------|------------|
| 0.0264107    | 0.3722962  | 0.4295701  | 0.3048755   | 0.2706723  | 1.265933   |
| 1.6055990    | 0.09926447 | 0.1386657  | 0           | 2.2036512  | 6.3051825  |
| 0.08295931   | 0.8716388  | 0.1146148  | 0.8517156   | 0.6005307  | 0.2484907  |
| 0.2557423    | 7.7561430  | 0.1679054  | 0.3954753   | 0.0119623  | 0.1137981  |
| 0.3169783    | 0.7090289  | 0.7682202  | 0.1842654   | 0.1599633  | 0.1304238  |
| 2.1432980    | 0.1363375  | 0.8296695  | 0.3266523   | 1.8569380  | 0.07129316 |
| 0.4069491    | 0          | 1.09544    | 0.06544946  | 0.2327418  | 0.2661611  |
| 0.4651360    | 0.9281264  | 1.8003070  | 0.2371733   | 0.07381973 | 0.04195184 |
| 0.2043028    | 2.9190210  | 0.2891892  | 0.07640989  | 0.2761495  | 0          |
| 0.06018719   | 0.2599042  | 0          | 0.9295777   | 0.6119610  | 0.2785407  |
| 0.2552878    | 1.3221640  | 0.8491703  | 1.7083480   | 0.5444205  | 1.3482830  |
| 0.4553563    | 0.02939203 | 0.8451806  | 0.07066225  | 0          | 0.1275533  |
| 0.5165391    | 0.1025889  | 0.3167940  | 0.9560555   | 0.4257821  | 0.2448501  |
| 0.7825427    | 0.3343296  | 2.8997550  | 0.3158835   | 0.04300629 | 0.03657176 |
| 0.4073895    | 0.7672260  | 0.4069941  | 0.3872120   | 0.8000583  | 0.7753389  |
| 0.1956610    | 0.1316181  | 0.3629470  | 0.4381921   | 0.1067016  | 0.5165052  |
| 0.1447738    | 0          | 2.0545330  | 0.5534043   | 0          | 0.4832320  |
| 1.2498       | 1.5271540  | 0.2523186  | 0.5191825   | 0.1065236  | 0.4255241  |
| 0.1254162    | 0          | 0.4236610  | 0.3827617   | 0.2070994  | 0.1062284  |
| 1.8573830    | 0.5816478  | 0.06544946 | 0.3134722   | 0.08663473 | 0.1521887  |
| 0.09284691   | 0.2135507  | 0.13626    | 0.09430906  | 0          | 0.7156881  |
| 0.03082947   | 0.1118063  | 0          | 0.1604992   | 0.2162594  | 0.2461079  |
| 0.0602629    | 0.05849695 | 0.7058302  | 0.08601257  | 0.4846286  | 0.9938378  |
| 0.03392989   | 1.6375155  | 6.925830   | 0.2270831   | 0.2155636  | 0          |
| 0.06422118   | 0.8515014  | 0          | 0.1176547   |            |            |
| TCGA-C4-A0EZ | 273        | 1          | 0.1466790   | 0.1568558  | 0          |
| 0.5524195    | 0.9733978  | 0.2753629  | 0           | 0.2550502  | 0.5361508  |
| 0.3026473    | 0.2458380  | 0.1262655  | 0.006254798 | 0.1742696  | 0.02383393 |
| 0.08753821   | 0.2192261  | 3.48032463 | 0.015360    | 0.3315083  | 0.01433529 |
| 0            | 0.4220592  | 2.9520030  | 0.1325345   | 0.2334352  | 0.02864887 |
| 0.2930273    | 0.2416844  | 0.3465871  | 0.2167135   | 0.3051306  | 0.1488351  |
| 0.1403630    | 0.02073273 | 2.3764470  | 0.09253631  | 17.030840  | 0.3384027  |
| 0.01655714   | 0.6983162  | 1.8769228  | 4.306830    | 0.03547515 | 0.4110490  |
| 0.6629267    | 0.03419214 | 0.06655325 | 9.0164350   | 0.09454126 | 0.8982543  |
| 0.6848659    | 0.2864887  | 0.09041488 | 0.3591750   | 0.4641961  | 0.3445695  |
| 0.1643575    | 0.1695174  | 0.2049940  | 0.7272405   | 1.0231740  | 0.2016880  |
| 0.03896314   | 0.1213039  | 0.05858483 | 0.1206268   | 0.9286185  | 0.2027695  |
| 0.1445217    | 0          | 0.02586628 | 0.08350063  | 0          | 0.1377650  |
| 0.05413406   | 0.08338811 | 0.01904702 | 0.5651284   | 0.3437864  | 0.05341314 |
| 0.2813984    | 1.0220680  | 0.02820724 | 0           | 0          | 0.6120218  |
| 2.6319180    | 0.05456927 | 0.7617360  | 0.1507835   | 1.1525030  | 0.05266923 |
| 0.06728916   | 13.179350  | 5.2176080  | 0.004721162 | 0          | 1.0591762  |
| 0.3858827    | 0          | 0.03156637 | 0.08922225  | 1.2384350  | 0.09685502 |
| 2.1056920    | 0.1507635  | 0          | 1.4803610   | 0.2190145  | 0          |
|              |            |            |             | 3.9483350  | 0.05166189 |

|              |            |            |             |             |            |            |             |
|--------------|------------|------------|-------------|-------------|------------|------------|-------------|
| 0.3921555    | 0          | 0.3959844  | 0.1376815   | 1.3605573   | 0.0535070  | 0          | 0.09934284  |
| 0            | 0.2822127  | 1.1337640  | 0.03804477  | 0.1206268   | 0.6771167  | 0.04911235 |             |
| 0.3636202    | 0.09501635 | 0.4786899  | 0           | 1.1288514   | 0.3143240  | 0.6343024  |             |
| 0.3694331    | 1.7189320  | 0.2766871  | 0.2138539   | 0.2864887   | 0.7804532  | 0.2351773  |             |
| 0.2614044    | 0.06960093 | 2.1933210  | 0.05577656  | 0.2036796   | 0.3557463  |            |             |
| 0.02463616   | 0.1528969  | 0          | 0.4616461   | 0.5450272   | 0.3428087  | 0.1610584  |             |
| 0.03431625   | 0.2090635  | 2.9744560  | 0.1246698   | 0.4413057   | 0          | 0.1929414  |             |
| 0.1345783    | 0.1376815  | 1.0716850  | 0.5370391   | 0.5389309   | 0.1178084  |            |             |
| 0.07722157   | 0          | 0.03183208 | 0.05764711  | 0.09625582  | 0.5966317  | 0.09477821 |             |
| 0.3990863    | 0          | 0.4098867  | 0.2496139   | 0           | 0          | 0.1691577  | 0.6813785   |
| 0.4110492    | 6.175360   | 0.3360914  | 0.1138366   | 0.05255212  | 0.4149146  | 0.2532231  |             |
| 0            | 0.1649935  | 0          | 0.2285154   | 0.1951251   | 0.3541892  | 0          | 0.8653663   |
| 0.1435162    | 0.06045804 | 1.66559    | 0           | 0.02061969  | 0.03419214 | 0.09610294 | 0           |
| 0.03487535   | 1.18311    | 0.07444194 | 0.009781817 | 0.1163074   | 1.1236460  | 0.02433495 |             |
| 0.02206331   | 0          | 0.1794753  | 0.0198491   | 0.2713513   | 0.8852437  | 0.04756793 |             |
| 0.0461740    | 0.6606795  | 0.03394659 | 0.02732406  | 2.1014450   | 1.5879989  | 0.358403   |             |
| 0.07869331   | 0.1276148  | 0          | 0.2356169   | 0.9101544   | 0          | 2.1812340  | 0.004665249 |
| 0.1114435    |            |            |             |             |            |            |             |
| TCGA-FD-A62P | 191        | 1          | 0.01782301  | 0.05717879  | 0.06463689 | 0.2802618  |             |
| 0.1367588    | 22.985720  | 0.1295388  | 0.2276849   | 0           | 0          | 1.3529610  | 0.2388755   |
| 0.2973297    | 0.03852595 | 0.1769333  | 0           | 0.008360246 | 0.3882185  | 0.01061892 |             |
| 0.5265213    | 0.1465103  | 2.07822823 | 0.010910    | 0.03282211  | 0.1724467  | 0.1641105  |             |
| 0.2559294    | 2.25652    | 0.6705088  | 0.1180982   | 0           | 0.1531698  | 0.03777732 |             |
| 0.2919679    | 0.01900227 | 0.4632530  | 0.1086233   | 0.1315618   | 0.04144478 |            |             |
| 0.1351606    | 0          | 0          | 0.04122842  | 1.4083250   | 0.0565392  | 0.1006893  | 0.04426099  |
| 0.5025885    | 0.09291553 | 2.6905490  | 0.09483311  | 0.4120602   | 0.2048312  |            |             |
| 1.0451250    | 0.3967508  | 0          | 0.09848696  | 0.7605308   | 0          | 0          | 0.4378004   |
| 0.03829246   | 0.1722752  | 0.1711170  | 0.3722704   | 0.6332648   | 0          | 0.1146169  |             |
| 0.1510528    | 0.05219003 | 0.3703007  | 1.3128840   | 0.1940880   | 0.1264767  |            |             |
| 0.02026706   | 0.1370342  | 0.08061571 | 0.1848602   | 0.0677561   | 0.1287797  |            |             |
| 0.1090530    | 0.1426103  | 0.1133319  | 0           | 0.06480263  | 0          | 0          | 0.06201969  |
| 0.05819087   | 0.1195984  | 0          | 0.1427854   | 0.8405151   | 0.7923435  | 0.1089174  |             |
| 0            | 0          | 1.4208     | 0.4723930   | 0.3656868   | 0          | 0.02188141 | 0.1642172   |
| 0.4172055    | 0.0351992  | 0.05243366 | 0.1798792   | 1.4828890   | 0.05960619 |            |             |
| 0.03786221   | 0          | 0.05243366 | 0.09555018  | 0.9451242   | 0.2947291  | 0          |             |
| 0.1265761    | 0.06880134 | 1.4631750  | 0.02876838  | 0.5587257   | 0          | 0.3862323  |             |
| 0.07521733   | 1.8437620  | 0.3122536  | 0           | 0.7936983   | 0.2762079  | 0.08499896 | 0           |
| 0.0441065    | 0.1226846  | 0.2331460  | 0.6906913   | 0.1501368   | 0.2336489  |            |             |
| 0.04426099   | 0          | 0.05388704 | 0.7332599   | 0           | 0.1209236  | 0.2851506  |             |
| 0.06564422   | 0.4374177  | 0.06350006 | 0.04570167  | 0           | 0.4526512  | 0.6987118  |             |
| 0.06530497   | 0.1614890  | 0.1795597  | 0.6564422   | 0.2812744   | 0.4367001  | 0          |             |
| 0.5689987    | 0          | 0.08734916 | 0           | 0.4153131   | 0.1491034  | 0.1814939  |             |
| 0.1345741    | 0.01646451 | 0.5903851  | 0           | 0.03856514  | 0.5603775  | 0.6109369  |             |
| 0.1722182    | 0.1834702  | 0.08245685 | 0.5542330   | 0.2221804   | 0          | 0.07716954 |             |

|              |             |            |            |             |                                  |
|--------------|-------------|------------|------------|-------------|----------------------------------|
| 0.9455893    | 0.4047281   | 0.06134229 | 0.3238534  | 0.02364174  | 0.4120782                        |
| 0.3296481    | 1.4959110   | 0.1032154  | 0.6017387  | 0.2127359   | 0.03852595                       |
| 0.04020526   | 0.1860754   | 0          | 0.08224601 | 0           | 0.30966 0.4170466 0 0            |
| 0.5500280    | 0.3642958   | 0.6592963  | 0.5984505  | 0.1996552   | 0.6694841                        |
| 0.02809675   | 0.05281719  | 1.0860520  | 0.04786558 | 0.0882130   | 0.9535585                        |
| 0.3701774    | 0.07283292  | 0.05603775 | 0.05783301 | 0.0479564   | 0.2626293                        |
| 0.8668339    | 0.1381040   | 0.08268165 | 0          | 0           | 0.09795746 0.06992229 0.08625605 |
| 0            | 0.05229803  | 0.1998745  | 0.2071559  | 0           | 0.01474505 0.2695789             |
| 0.08466675   | 0.05836726  | 0.2060749  | 0.05546384 | 0.03178997  | 0.03085839                       |
| 0.2240633    | 0.09074694  | 0.07304342 | 0.4130617  | 0.03579748  | 0.1974455                        |
| 2.1223920    | 0.02337389  | 0.1137144  | 0.1499883  | 0.3149286   | 0.03287904 0                     |
| 0.1864542    | 0.006235634 | 0.1737831  |            |             |                                  |
| TCGA-CF-A47V | 379 0       | 0.1985523  | 0.2547938  | 0.04800464  | 0.2938523                        |
| 0.1625092    | 26.853470   | 0.1924122  | 0.6763896  | 0.2733468   | 0.1308001                        |
| 0.2083483    | 0.4967436   | 1.6929630  | 0.1859814  | 0.05396996  | 0.1566762                        |
| 0.1303890    | 0.8649683   | 0.03943238 | 0.4344864  | 0           | 2.189562 64.440780 0.02437638    |
| 0.08538201   | 0.06094095  | 0.2851111  | 0          | 2.33665 0   | 0.2317261 0.05687822             |
| 0.6172435    | 0.1269303   | 0.1411264  | 0.5734159  | 0.2890766   | 0.2540422                        |
| 0.04924844   | 0.05843093  | 0.1337761  | 0.1367564  | 0.0306196   | 38.71868                         |
| 0.1259719    | 0.04985342  | 0.02465387 | 3.35937    | 0.5520533   | 3.7719240 0.2465079              |
| 0.6460624    | 0.1872301   | 0          | 3.5359140  | 0.06724571  | 2.9110590 0                      |
| 1.0345570    | 0.01909636  | 0.3918468  | 0.1587299  | 0.5222370   | 0.2137792                        |
| 0.005869235  | 0.2766526   | 0.2454029  | 0.2907044  | 1.8907321   | 11.578780 0.2252378              |
| 0.09266501   | 0.01105082  | 0.2107276  | 0.01453897 | 0.1197436   | 0.2549713                        |
| 0.4025697    | 0.3347483   | 0          | 0.2310921  | 0.1335438   | 0 0.06837819                     |
| 0.1443832    | 0.06562872  | 0          | 0.1458595  | 0.02069439  | 0.01350541 0.8461609             |
| 0.03412693   | 0.05302207  | 0.1909761  | 0.5478756  | 0.009333572 | 0.05432652 0                     |
| 0.1279033    | 12.191610   | 0.7845902  | 0.3093925  | 0.1300074   | 0.7927471                        |
| 0.08980772   | 0.6912058   | 0.1568508  | 0.03894152 | 0.1001947   | 3.797635                         |
| 0.0438547    | 0.7968317   | 0.00937319 | 0          | 0.6620058   | 0.5322253 0.1373984              |
| 1.0397270    | 0.1880115   | 0.2486745  | 0.7354254  | 0.2136575   | 0.4564509 0                      |
| 0.4905510    | 0.3339824   | 0.3768457  | 0.1042767  | 1.2513210   | 0.7692546                        |
| 0.1613250    | 0.1042767   | 0.1637855  | 0.2277890  | 0.3116759   | 1.5388910 0                      |
| 0.03287183   | 0.1614608   | 0.5602929  | 3.2674720  | 0.03776622  | 0 0.4235523                      |
| 0.09750552   | 0.2526706   | 0.09432067 | 0.1018254  | 0.0349531   | 0.3361757                        |
| 1.2710270    | 0.09700162  | 0.3298210  | 0.1000168  | 1.0969370   | 0.5067695 0.7489055              |
| 0.6043311    | 1.3381860   | 0.1729937  | 0.1842436  | 1.41522     | 0.1107364                        |
| 0.2021883    | 0.05996745  | 0.06113945 | 0.3372832  | 0.08038464  | 0.2577746                        |
| 0.2080910    | 0.3536438   | 0.4156858  | 0.34065    | 0.08505443  | 1.5861040 0.2062617              |
| 0.03369805   | 0.0286562   | 0          | 0.5343719  | 0.5466936   | 0.3515293 0.05267487             |
| 0.5257028    | 0.3853705   | 0.24851    | 0.1423615  | 0.1718847   | 0.4265866                        |
| 0.05722504   | 0.1731863   | 0.4590041  | 0.2352107  | 0.07853478  | 0 2.317479                       |
| 0.06194658   | 0.4889931   | 0.4868251  | 0.3261507  | 0.03381948  | 2.570648                         |
| 1.0598620    | 0.1359236   | 0.4633127  | 0.08346776 | 0.3922636   | 0.8452631                        |



|              |            |            |            |            |            |            |            |
|--------------|------------|------------|------------|------------|------------|------------|------------|
| 0.07109777   | 0          | 0          | 0.04149553 | 0.2624275  | 0.1352292  | 0.1664728  | 0          |
| 0.07123269   | 0.7877020  | 0.5293316  | 0          | 0.2456246  | 0          | 0.1430990  | 0.05193001 |
| 0.1067680    | 0          | 0          | 2.6539280  | 0.1449406  | 0.1752141  | 0.05005283 | 0.1257609  |
| 0.1024596    | 0.1928405  | 1.24949    | 0.1888786  | 0.04583593 | 0.5530610  | 0.03369805 |            |
| 0.1084960    | 0.4483611  | 0.1063445  | 3.079422   | 10.854970  | 0.09113666 | 0.0633402  |            |
| 0.05569677   | 0.5262564  | 0.02441866 | 0.05032121 | 1.0826320  | 0.09262182 |            |            |
| 0.06453275   |            |            |            |            |            |            |            |
| TCGA-XF-A9SI | 2423       | 0          | 0.1291799  | 0.05180348 | 0          | 0.2837871  | 0.09912181 |
| 78.154480    | 0.2250333  | 0.3403470  | 0.2357492  | 0.1111512  | 0.1595619  | 2.052603   |            |
| 0.2164191    | 0.4788944  | 0.08726044 | 0.12595    | 0.3822561  | 0.06816879 |            |            |
| 0.6682729    | 0.03848259 | 0          | 0          | 2.4849333  | 7.829780   | 0.1189462  | 0.3124704  |
| 0.5203895    | 0          | 1.7377291  | 0.5887810  | 0.6419759  | 0.3634466  | 0.03469263 |            |
| 0.9240998    | 0.3871029  | 0.1377272  | 0.6062379  | 0.1476177  | 0.5065739  |            |            |
| 0.03003888   | 0.09503921 | 0.07531954 | 0.1668280  | 0.2988207  | 4.2221670  | 0.05122402 |            |
| 0.09122366   | 0.3909757  | 0.5854382  | 0.6313549  | 4.6013390  | 0.08591797 |            |            |
| 0.5392442    | 0.3283256  | 0          | 0.6350332  | 1.8218340  | 0.2058008  | 0.9010448  | 0          |
| 0.0543875    | 0.4327018  | 0.1387705  | 0.1281252  | 0.2024009  | 0.1936333  |            |            |
| 0.6745475    | 0.9388348  | 0.02147949 | 0.08653492 | 0.2651518  | 0.1536721  |            |            |
| 0.8806592    | 1.8833140  | 0.1221181  | 0.4019245  | 0.4313856  | 0.05508534 |            |            |
| 0.6562309    | 0          | 0.1435557  | 0.1841593  | 0.35002    | 0.02470026 | 0.06264607 |            |
| 0.3876110    | 0.04170699 | 0.1174212  | 0          | 0          | 0.04682441 | 0.2272042  |            |
| 0.2998474    | 0.2737391  | 0.2497870  | 0.06468118 | 1.4917041  | 0.5594810  | 0.01518126 |            |
| 0.06627247   | 0          | 1.0921973  | 0.9053530  | 0.8466788  | 0.0838723  | 0.05286497 |            |
| 0.4463380    | 0.1825928  | 0.5669768  | 0.1594508  | 0.09500887 | 0.1222267  |            |            |
| 1.7604270    | 0.3240161  | 0.02286855 | 0          | 0.1425133  | 0.2164191  | 1.180565   |            |
| 0.4005330    | 0.2641978  | 0.07645121 | 0.1496002  | 1.3657940  | 0.1042556  | 0.3880871  |            |
| 0.2081558    | 1.5924030  | 0.1022194  | 2.5260190  | 0.1237683  | 0          | 0.6433907  |            |
| 0.2502420    | 0.1411819  | 0.04240211 | 0.07992021 | 0.2223023  | 0.5491934  |            |            |
| 0.9528623    | 0          | 0.2469645  | 0.08020014 | 0.1969646  | 0.09764238 | 0.5314616  |            |
| 0.0460707    | 0.1460743  | 0.4380615  | 0.1189462  | 0.1320989  | 0.0575305  |            |            |
| 0.04140531   | 0          | 0.6834967  | 1.1458590  | 0.02958287 | 0.0365769  | 0.1626795  |            |
| 0.9664377    | 0.2689895  | 0.9279708  | 0.5203895  | 0.7303027  | 0.1708742  |            |            |
| 0.07913758   | 0.2809465  | 0.4094703  | 0.06754318 | 0.08221594 | 0.4226664  |            |            |
| 0.02983341   | 1.1109120  | 0.1630519  | 1.0661640  | 0.4883855  | 0.3120564  |            |            |
| 0.08311121   | 0.1494104  | 0.8167985  | 0.6038806  | 0.2055398  | 0.1048724  |            |            |
| 2.18068      | 0.2037112  | 0.2778779  | 0.8463703  | 0.08567685 | 0.2197884  |            |            |
| 0.5641324    | 0.6241432  | 0.1469478  | 0.0838723  | 0.3469263  | 0.2443292  |            |            |
| 0.1311322    | 0.1746035  | 0.1147726  | 0.1277386  | 0.04031186 | 0.1942264  | 0          |            |
| 0            | 0.1319721  | 0.4614780  | 0.2062805  | 0.1991056  | 1.5014520  | 0.1658121  | 0.6892576  |
| 0.1145493    | 0.1196298  | 1.1018930  | 0.1300974  | 0.07992021 | 0.1205113  |            |            |
| 0.5028259    | 0.2286665  | 0.06598599 | 0.1015394  | 0.2619810  | 0.04344808 |            |            |
| 0.3111522    | 1.0471250  | 0.1251210  | 0.07490885 | 0.2898372  | 0.1163768  | 0          |            |
| 0.02111633   | 0.2344417  | 0.2704386  | 0          | 0.3018076  | 0.8445666  | 0.08840594 |            |
| 0.06679445   | 0.1221181  | 0.1022764  | 0.1201823  | 0.1157553  | 0.3517483  |            |            |

|              |            |            |            |            |            |            |
|--------------|------------|------------|------------|------------|------------|------------|
| 0.20161      | 0.02795743 | 0.3761460  | 1.233239   | 0          | 0.8290641  | 0.2594577  |
| 0.8049775    | 9.6007060  | 1.270593   | 0.4636091  | 0.06794403 | 0.2139920  | 3.574575   |
| 0.03069322   | 0.5682053  | 0.03954601 | 0.08996911 |            |            |            |
| TCGA-GU-A42Q | 344        | 1          | 0.09748069 | 0.1303051  | 0.2209521  | 0.4395693  |
| 0.1121977    | 74.398260  | 0.2302613  | 0.2223739  | 0.5032559  | 0.1083666  |            |
| 0.2621994    | 0.2939623  | 0.5646553  | 0.1251107  | 0.1360848  | 0.08653649 |            |
| 0.1886169    | 0.0265414  | 0.02177956 | 0          | 0.1001649  | 1.33271359 | 1.0649     |
| 0.2131757    | 0.5239864  | 0.6170876  | 0          | 0.6942236  | 0.6699808  | 0.08074043 |
| 0.2133142    | 0.02617947 | 1.2655370  | 2.726383   | 0.05196527 | 0.03519033 |            |
| 0.3341821    | 0.06296157 | 0.2890132  | 0.08688877 | 0.1515654  | 0.03147259 |            |
| 0.05637342   | 1.6280610  | 0.7730851  | 0.4359769  | 0.01512999 | 0.8835573  |            |
| 1.58809311   | 8.73770    | 3.241736   | 2.0032990  | 0.09694893 | 0          | 0.1537068  |
| 0.06081668   | 1.0799030  | 0.1231244  | 0.1360508  | 0.02617947 | 0.0650425  |            |
| 0.1722321    | 0.7671195  | 0.1696738  | 0.1180760  | 0.04322315 | 0.1828408  |            |
| 0.1678146    | 0.2676064  | 0.5379738  | 0.0747985  | 0.1382276  | 0.07582426 |            |
| 0.1169869    | 0.1662722  | 0.1739891  | 0.1929014  | 0.2708221  | 0.3242605  |            |
| 0.1980969    | 1.0810680  | 0.2600041  | 0.08054235 | 0.2324456  | 0.1258904  |            |
| 0.3544298    | 0          | 0.03660689 | 0.1978719  | 0.2286014  | 0.03729699 | 0.344278   |
| 0.2199076    | 0.04880919 | 0.1889216  | 3.4556910  | 0.03723187 | 0          | 0.1502474  |
| 0.3237870    | 3.229617   | 0.8889236  | 0.7278469  | 0.09474476 | 0.3929473  |            |
| 0.1102294    | 1.21772    | 0.3128411  | 0          | 0.2459566  | 2.6743580  | 0.08074043 |
| 0.4075107    | 0.0215711  | 0.1231244  | 0.1075422  | 0.1633124  | 0.7286426  |            |
| 0.3526215    | 0.06645559 | 0          | 0.3010402  | 3.2434990  | 1.573451   | 5.024740   |
| 1.5766830    | 1.285599   | 0.2152120  | 2.201502   | 0.1439871  | 0.7425451  | 0.9913866  |
| 0.06456821   | 0.03199714 | 0.3618524  | 0.08387599 | 0.4781860  | 7.941649   | 0          |
| 0.02662319   | 0.03025999 | 0.03715796 | 0.2210463  | 0.2005236  | 0.486717   |            |
| 0.6613762    | 0.4195651  | 0          | 0.5981003  | 0.4341320  | 1.874697   | 0.1287036  |
| 0.2578874    | 0.1602376  | 0          | 0.1932095  | 0.3375897  | 0.5609887  | 0.217227   |
| 0.3799848    | 1.3089740  | 7.131819   | 0.08596245 | 0.1194363  | 0.02120056 |            |
| 0.3340445    | 0.1274222  | 0.4032673  | 0.1533409  | 0.04502528 | 0.06209687 |            |
| 0.03699883   | 0.1142522  | 0.7279171  | 0.6879441  | 0.2649167  | 0.2508668  |            |
| 0.09708755   | 0.7780356  | 0.1898731  | 0.06204112 | 0.7386209  | 0.1763107  |            |
| 1.7524410    | 4.613179   | 0.5279764  | 0.01616319 | 0.5543646  | 0.3422302  |            |
| 0.1211107    | 0.5746043  | 0.2531641  | 0.5963102  | 0.1316955  | 0.2144001  |            |
| 0.3271230    | 0.2345564  | 0          | 0.2768461  | 0.1140492  | 0.03462616 | 0.09958762 |
| 0.1456592    | 0.6537793  | 0.1502474  | 1.1959580  | 3.412466   | 1.0402440  | 2.593209   |
| 0.01805481   | 0.2263109  | 0.03272434 | 0.2713893  | 0          | 0.07639699 | 0.3048462  |
| 0.1244845    | 0.1915571  | 0.07907759 | 0.06557288 | 0.6905856  | 1.2642770  |            |
| 0.3580050    | 0.03124494 | 0.0658645  | 0.3348537  | 0.2337079  | 0.1179417  |            |
| 0.1360508    | 1.3408010  | 9.185821   | 1.6287070  | 0.06671217 | 0.07056544 | 0.5529105  |
| 0.3087161    | 0.0979463  | 0.1944249  | 0.5561463  | 0.1086695  | 0.02109701 |            |
| 0.3018661    | 0          | 0.1997509  | 0.6082433  | 0.02447373 | 1.6198552  | 3.15457    |
| 0.2037459    | 0.07774332 | 0          | 0.4844426  | 0.04495695 | 0.04632293 | 0.139062   |
| 0.9933085    | 0.2630806  |            |            |            |            |            |

|                           |              |             |                    |                 |             |             |
|---------------------------|--------------|-------------|--------------------|-----------------|-------------|-------------|
| TCGA-BT-A42F              | 864          | 0           | 0.052645513        | 0.042223607     | 0.095462069 | 0.219133085 |
|                           |              |             |                    |                 |             |             |
| 0.040395745               | 47.751229028 | 0           | 0.153052461        | 0.096076368     | 0.181192567 |             |
|                           |              |             |                    |                 |             |             |
| 0.039016379               | 0.550680796  | 0.03527946  | 0.878251031        | 0.021337082     | 0.100325276 |             |
|                           |              |             |                    |                 |             |             |
| 0.311566518               | 0.092604206  | 0.086003845 | 0.039207635        | 0.172804022     | 0.054095172 |             |
|                           |              |             |                    |                 |             |             |
| 1.796390755               | 63.204867751 | 0.042415533 | 0.396178441        | 0.181780855     | 0           | 0           |
|                           |              |             |                    |                 |             |             |
| 0.666529801               | 0.043604753  | 0           | 0.028277022        | 0.390552589     | 0.042068942 | 0.098225444 |
|                           |              |             |                    |                 |             |             |
| 0.19004923                | 0.140372322  | 0.102009246 | 0.532524301        | 0.086402011     | 0.07162272  |             |
|                           |              |             |                    |                 |             |             |
| 0.203965403               | 0.456676209  | 0.132360528 | 0                  | 0.049569281     | 0.024513355 | 0.159058248 |
|                           |              |             |                    |                 |             |             |
| 0.274453447               | 2.410988178  | 0.035014699 | 0.135237931        | 0.116351836     | 0.070161032 |             |
|                           |              |             |                    |                 |             |             |
| 0.195320088               | 0.371231788  | 0.01524933  | 1.166427151        | 0               | 0           | 0.117561162 |
|                           |              |             |                    |                 |             |             |
| 0.017088769               | 0.126361113  | 0.03945631  | 0.305447372        | 0.212560756     | 0.052522048 |             |
|                           |              |             |                    |                 |             |             |
| 0.077585479               | 0.069715482  | 0.269777679 | 0.170905077        | 0.363561709     | 0.174186455 |             |
|                           |              |             |                    |                 |             |             |
| 0.020474859               | 0.027469583  | 0           | 0.130104965        | 0.148826431     | 0.253518127 | 0.150103226 |
|                           |              |             |                    |                 |             |             |
| 0.142645868               | 0            | 0.102122213 | 0.05952327         | 0.167379681     | 0.033994234 | 0.095706843 |
|                           |              |             |                    |                 |             |             |
| 0.130509332               | 0            | 0.061064489 | 0.185187993        | 0.013428432     | 0.102262106 | 0           |
|                           |              |             |                    |                 |             |             |
| 0.113365737               | 0.766689414  | 0.012373834 | 0                  | 0               | 0.031793585 | 0.436047533 |
|                           |              |             |                    |                 |             |             |
| 0.120018228               | 0            | 0.026930497 | 0.097012784        | 0.029765286     | 0.497675584 | 0.025992806 |
|                           |              |             |                    |                 |             |             |
| 0.038719573               | 0.099623671  | 1.227197003 | 0.043604753        | 0.044016119     | 0.009319767 | 0           |
|                           |              |             |                    |                 |             |             |
| 0.193597867               | 0.176397301  | 0.288080035 | 0.108821192        | 0               | 0.031156652 | 0.128709203 |
|                           |              |             |                    |                 |             |             |
| 1.484295603               | 0.053109944  | 0.123777089 | 0.042415533        | 2.323037196     | 0.138860375 |             |
|                           |              |             |                    |                 |             |             |
| 0.066415781               | 0.014411455  | 0           | 0.771191505        | 0.050991351     | 0.034870767 | 0.069121609 |
|                           |              |             |                    |                 |             |             |
| 0.097711175               | 0            | 0.103299821 | 0.463672905        | 0.036956108     | 0           | 0.065368947 |
|                           |              |             |                    |                 |             |             |
| 0.613671538               | 0.112652924  | 0           | 0.24718986         | 0               | 0           | 0.281349263 |
|                           |              |             |                    |                 |             |             |
| 1.615588651               | 0.522494052  | 0.024112189 | 0.089438504        | 0.132595626     | 0.242374473 |             |
|                           |              |             |                    |                 |             |             |
| 0.369256411               | 0.205214956  | 0.247423941 | 0.245102891        | 0.046424961     | 0.021500961 |             |
|                           |              |             |                    |                 |             |             |
| 0.06869755                | 0.24354593   | 0.165157827 | 0                  | 0.231877602     | 0           | 0.670721812 |
|                           |              |             |                    |                 |             |             |
| 0.094927947               | 0.248286045  | 0.311821265 | 0.222555095        | 0               | 0.057507374 | 0.267391487 |
|                           |              |             |                    |                 |             |             |
| 0.205086092               | 0            | 0.455886032 | 0.634790286        | 0.265663123     | 0.045298142 | 0.234550161 |
|                           |              |             |                    |                 |             |             |
| 0.034916435               | 0.238040097  | 0.099174482 | 0.116279342        | 0.065330809     | 0.136724062 |             |
|                           |              |             |                    |                 |             |             |
| 0.267060762               | 0.056898885  | 0.029689523 | 0.161944132        | 0.046774021     | 0.045117033 | 0           |
|                           |              |             |                    |                 |             |             |
| 0.2638478                 | 0            | 0.224402819 | 0                  | 0.154118891     | 0.067253457 | 0.162285517 |
|                           |              |             |                    |                 |             |             |
| 0.815861614               | 0.098290109  | 0.865164509 | 0.072618033        | 0.058504183     | 0.074156958 |             |
|                           |              |             |                    |                 |             |             |
| 0.247423941               | 0            | 0           | 0.011002408        | 0.416248304     | 0.053783384 | 0.124143023 |
|                           |              |             |                    |                 |             |             |
| 0.035413348               | 0.111887496  | 0.497865247 | 0                  | 0.020352055     | 0.033748344 | 0.047427788 |
|                           |              |             |                    |                 |             |             |
| 0                         | 0.097530951  | 0.106159468 | 0                  | 0               | 0.008199839 | 0.267704592 |
|                           |              |             |                    |                 |             |             |
| 0.043553873               | 0.64697826   | 0.156305146 | 0.031346352        | 0.070000847     | 0.423224482 | 0           |
|                           |              |             |                    |                 |             |             |
| 0                         | 0.257921832  | 0.033505986 | 0.026969414        | 0.427034934     | 0.052869219 | 0.400959333 |
|                           |              |             |                    |                 |             |             |
| 1.533931596               | 0.038835956  | 0.440854356 | 0                  | 0.116279342     | 0.040465816 | 0.025017204 |
|                           |              |             |                    |                 |             |             |
| 0.16272089                | 0            | 0.137496324 |                    |                 |             |             |
|                           |              |             |                    |                 |             |             |
| TCGA-ZF-A9RF              | 1949         | 0           | 0.3158001          | 0.06432588      | 0.05453716  | 0.4173      |
|                           |              |             |                    |                 |             |             |
| 0.0461559                 | 19.061380    | 0.5464897   | 0.2744405          | 0.2070294       | 0.1485995   |             |
|                           |              |             |                    |                 |             |             |
| 9.9414250.1612403         | 0.6968636    | 0.1381511   | 0.1946061          | 0.1423975       | 0           |             |
|                           |              |             |                    |                 |             |             |
| 0.06551161                | 0.0358387    | 0.04936118  | 0.2472351          | 7.08195645.1616 | 0.1523145   |             |
|                           |              |             |                    |                 |             |             |
| 1.3095121.9385480.1079698 | 0            | 0.8703685   | 6.8256820.03760851 | 0.03230913      |             |             |

|                    |                            |                            |                    |                            |             |
|--------------------|----------------------------|----------------------------|--------------------|----------------------------|-------------|
| 0.3824938          | 0.06609307                 | 0.1603312.17149            | 0.1374758          | 0.1054546                  | 0.04895644  |
| 0.1140413          | 0.09352644                 | 0.8933563                  | 0                  | 1.2530840.2862286          | 0.05663752  |
| 0.2334066          | 1.1510130.1567943          | 3.7431830.04000756         | 0.5794573          | 0.05317713                 |             |
| 0.08016552         | 1.8857980                  | 0.002680582                | 1.5795580.05331007 | 0.1519527                  |             |
| 0.3358115          | 0                          | 0.004339002                | 0.3248535          | 0.04508251                 | 0.1047006   |
| 0.08001511         | 0.05641277                 | 0.1035534                  | 0.1210967          | 0.6639349                  | 0.8308063   |
| 0.2558883          | 0.1169722                  | 0.01255462                 | 0.08550131         | 0.1321396                  | 0.03400961  |
| 0.1114108          | 0.05716897                 | 0.8964241                  | 0                  | 0                          | 0.1412534   |
| 0.5467699          | 0.3727977                  | 0                          | 0.06977187         | 0.0235105                  | 0.009205941 |
| 0.03877096         | 0.5421363                  | 0.1101013                  | 0.5071661          | 0.007069129                | 0           |
| 0.1089814          | 2.39148                    | 1.0627730.1171650.06769533 | 0.8036346          | 0.1360385                  |             |
| 1.1508210          | 0                          | 0.03794311                 | 2.8583040          | 0.5532177                  | 0.06921657  |
| 0.7078515          | 0.3627906                  | 2.2667810.1243384          | 0                  | 0.03559938                 | 0.1199718   |
| 1.6834760.01213661 | 3.2056750.0969274          | 1.7380380.3490540.1517724  |                    |                            |             |
| 0.3293286          | 0.05923341                 | 1.0338920                  | 0.23109            | 0.07897788                 | 0.03721471  |
| 0.05175735         | 0.1180297                  | 0.9801106                  | 0.1689032          | 0                          | 0.07469011  |
| 0.5910711          | 0.4537027                  | 0.04290549                 | 0.1360385          | 0.6224085                  | 0.05538708  |
| 0.4920929          | 0.1607339                  | 0.2699244                  | 0                  | 1.2730760.6678917          | 0.02755042  |
| 0.03406394         | 0.53026                    | 0.7615724                  | 0.08350299         | 0.08039219                 | 0.4442506   |
| 0.5601058          | 0.1060897                  | 0.1719680.02616445         | 1.3398370.0943541  | 0.07656742                 |             |
| 0.1438255          | 0.1111351.7434740          | 0.1952352                  | 0.4728166          | 0.3638654                  |             |
| 0.07265427         | 0.07740119                 | 0.1855272                  | 1.5587740.6561239  | 0                          | 0.06511153  |
| 1.8857980.2656018  | 0.5693308                  | 1.3242130.03989528         | 0.6028489          | 0.2935917                  |             |
| 0                  | 0.1119698                  | 0.15622                    | 2.4949830.2600491  | 0.1356922                  | 0.3364296   |
| 0.05344368         | 0.1506858                  | 0                          | 0.2612746          | 0.6333870.04273352         | 0           |
| 0.5379034          | 0.7880619                  | 1.2040890.2105730.9885311  | 0.04741307         | 0.133693                   |             |
| 0.05962568         | 0.2019321                  | 0.1860735                  | 0.05611586         | 0.01257128                 | 0.3407301   |
| 0                  | 0.0975928                  | 0.1618522                  | 0.1107963          | 1.1330710                  | 0.02325412  |
| 0.1083813          | 0                          | 0.02622075                 | 0.5094478          | 0                          | 0           |
| 0.8529611          | 0.1428746                  | 0.08506331                 | 0.26429            | 0.5771683                  | 0.1072907   |
| 0.02603666         | 0.3503035                  | 0.3445534                  | 0.03081507         | 2.2412480                  | 1.457697    |
| 9.5253250.1725644  | 0.5037172                  | 0.06327605                 | 0.13286            | 0.5363372                  | 0           |
| 0.7007896          | 0                          | 0.06284095                 |                    |                            |             |
| TCGA-KQ-A41N       | 1604                       | 0                          | 0.2767768          | 0.05223177                 | 0.1771338   |
| 0.02498533         | 37.5888                    | 0.2268938                  | 0.05916566         | 1.7530250                  | 0.01608811  |
| 0.2303130.2182083  | 2.4142680.4047166          | 0.5310545                  | 0.1156249          | 0.1298278                  |             |
| 0.1063891          | 0.07760148                 | 0.05344084                 | 0.1338344          | 3.27073384.633330.07495598 |             |
| 0                  | 0.8245158                  | 0                          | 0                  | 4.4288280.05394028         | 0           |
| 0.2797174          | 0.06943291                 | 1.5516350.2563323          | 0.1021524          | 0.1514362                  |             |
| 0.0884538          | 0.02531408                 | 0.08410361                 | 0                  | 11.929160.1032950.1532964  |             |
| 0.0303237          | 2.6234590.2546299          | 4.0525540.0866283          | 0.2509396          | 0.1583235                  |             |
| 0                  | 2.2711942.2543720.05804259 | 10.314080                  | 0.1096743          | 1.70876                    | 0           |
| 0.01174404         | 0.3473604                  | 0.09761709                 | 0.4156315          | 0.1577661                  | 0.007219025 |
| 0.2268509          | 0.1207360.2741291          | 0.4651115                  | 0                  | 0.1231277                  | 1.190414    |

|                 |             |             |             |            |            |                     |
|-----------------|-------------|-------------|-------------|------------|------------|---------------------|
| 0.1223303       | 0.1295951   | 0.0178826   | 0.1104614   | 0.1447426  | 0          | 0.2352758           |
| 0.04980894      | 0.0947460   | 0.02265598  | 0.6211599   | 0.08410361 | 0.1775880  |                     |
| 0.04891195      | 0.01888461  | 0           | 0.01328907  | 0.2645022  | 0.1679014  | 0                   |
| 0.3996742       | 0.4492497   | 0.003826693 | 0.2004611   | 0          | 0.03932954 | 7.443759            |
| 1.8558230       | 0.03331377  | 2.1301330   | 0.1472819   | 1.2605930  | 0.03215382 | 0 0                 |
| 5.9204990       | 0.1078806   | 1.6879240   | 0.06917286  | 0.1645115  | 0.2394859  | 1.0474              |
| 0.08817228      | 0           | 0.08879401  | 0.03854164  | 0.09636809 | 0.6345396  | 0.03941908          |
| 0.1531157       | 0.2098767   | 0.2761169   | 0.03435482  | 0.1643163  | 0.1069642  |                     |
| 0.2565163       | 7.7523420   | 0.3153885   | 0.06039054  | 0.04275267 | 0.08058095 | 0.05603505          |
| 0.04259491      | 1.6490320   | 0.04571573  | 0           | 0.0404316  | 0          | 0.7875972 6.56423 0 |
| 0               | 0.1925286   | 0.05996478  | 0.1775880   | 0.05800613 | 0.2922334  | 0 0.4134885         |
| 0.5453490       | 0.02982744  | 0.0368793   | 0.2870428   | 0.5996478  | 0.4758129  |                     |
| 0.7035453       | 0.04372432  | 0.7363405   | 0.1148579   | 0.01329864 | 0.08498077 |                     |
| 0.7476035       | 0.4086096   | 0           | 0.1721034   | 0.03008005 | 0.04148507 | 0.09887127          |
| 0.1409142       | 0.3583261   | 0.5170444   | 0.1573182   | 0.1675967  | 0.1590148  |                     |
| 5.2113250       | 0.05073943  | 0.1243435   | 0           | 0.07852531 | 0          | 0.1120701 0.7452745 |
| 0.06478889      | 0.3612474   | 0.2174810   | 0.3236417   | 0.1616320  | 0.08456572 | 0.64129             |
| 0.2463492       | 0.05141746  | 0.2185411   | 0.05786076  | 0.0665439  | 0          | 1.392585            |
| 0.3809644       | 0           | 0.06653153  | 0.1509307   | 0.08319438 | 2.1078920  | 0.5046217           |
| 0.09119068      | 1.0285350   | 0.2438257   | 0.07237129  | 0.9615104  | 0          | 0.08058095          |
| 0.06075379      | 0.05103856  | 0.2075013   | 0.03326577  | 0.2047578  | 0.2113175  | 0                   |
| 0.1568623       | 0.8194882   | 0.3153885   | 0.02517605  | 0          | 0.02933474 | 0                   |
| 0.02129091      | 0.05252888  | 0.0908915   | 0.01194332  | 0.01014343 | 0.8515491  | 0                   |
| 0.04040801      | 0           | 0.2320245   | 0.05331742  | 0.2258947  | 0.1519956  | 0.2032768           |
| 0.02818857      | 0.3431362   | 0           | 0.2668953   | 0.9752382  | 0.03270034 | 1.26254             |
| 4.79879         | 0.03736534  | 0.1298450   | 0.1370115   | 0.07192038 | 0.05005733 | 0.1237879           |
| 0.9445157       | 0.005696137 | 0.1474085   |             |            |            |                     |
| TCGA-GD-A3OQ 95 | 0           | 0.1253451   | 0.0781910   | 0.03788135 | 0.1739132  | 0 29.3921           |
| 0               | 0.06832624  | 0.2859384   | 0.6471092   | 0.09289511 | 0.3204985  | 0.08399779          |
| 0.2323390       | 0.03386801  | 0.03518197  | 0.07418168  | 0          | 0.2730251  | 0.03111683          |
| 0.1714307       | 0.0429322   | 1.2958682   | 0.1757700   | 0.05770757 | 0.05614712 | 0.1923586           |
| 0.1874887       | 0.06612326  | 0.7708083   | 0.03460656  | 0.0783683  | 0.04488367 |                     |
| 0.3542388       | 0.1252038   | 0.06681929  | 0.1206648   | 0.1697606  | 0.02698627 |                     |
| 0.1263043       | 0.07211911  | 0.0812040   | 0.02697925  | 0.0241625  | 4.0067880  | 0.1325424           |
| 0.1573611       | 0           | 0.2103922   | 0.3539539   | 2.2678060  | 0.02778914 | 0.9123093           |
| 0.2677909       | 0           | 0.2867763   | 0           | 0.01396443 | 0.3085752  | 0.1110871           |
| 0.07036394      | 0.1399522   | 0           | 0.004520788 | 0.03899991 | 0.1252567  | 0.3393822           |
| 0.2024366       | 0.009263045 | 0.1007592   | 0.03319748  | 0.1835202  | 1.220737   |                     |
| 0.6411952       | 0.1184929   | 0.008124854 | 0.008720406 | 0.1662891  | 0.03441892 |                     |
| 0.09449193      | 0.1392941   | 0.1191282   | 0.1132098   | 0          | 0.08104848 | 0.2034961           |
| 0               | 0.0539585   | 0.2278709   | 0.05178884  | 0          | 0.05452126 | 0.01633033 0        |
| 0.2139660       | 0           | 0.1462042   | 1.3770790   | 0.1153896  | 0.02143504 | 0 0.07569818        |
| 0.3460656       | 0.1190644   | 0.02712749  | 0.1025912   | 0.1924836  | 0.1181149  |                     |
| 0.4325930       | 0.04125797  | 0           | 0.05271035  | 0.7566882  | 0.03460656 | 0.1397322           |

|              |            |            |            |            |            |                       |
|--------------|------------|------------|------------|------------|------------|-----------------------|
| 0.007396559  | 0.03518197 | 0.1229179  | 0          | 0.2192043  | 0.3022777  | 0                     |
| 0.02472723   | 0.0994609  | 1.5417930  | 0.03372023 | 0.8186225  | 0.1009882  |                       |
| 0.5150438    | 0          | 0.2371966  | 0.5833144  | 0          | 0.6202106  | 0.6879709             |
| 0.09409468   | 0          | 0.07754769 | 0.1078515  | 0.3006046  | 0.7175811  | 0 0 0                 |
| 0            | 0.06316251 | 0.3724389  | 0.08940609 | 0          | 0.5231474  | 0 0.1139355           |
| 0.2605057    | 0.08035231 | 0          | 0.4421376  | 0.5779508  | 0.09568223 | 0.09464287            |
| 0.2104669    | 0.3847171  | 0.3083208  | 0.1721739  | 0.2244183  | 0.8614632  |                       |
| 0.0736896    | 0.05972423 | 0.05452126 | 0.3006707  | 0          | 0.05318352 | 0.1261905             |
| 0.009649257  | 0.03992348 | 0.06343302 | 0.1130082  | 0.1313668  | 0.4422948  |                       |
| 0.1009309    | 0.2419319  | 0.04832499 | 0.3811174  | 0.2929769  | 0.02659176 |                       |
| 0.06783943   | 0          | 0.1054207  | 0.2516536  | 0.2992982  | 0          | 0.2220281             |
| 0.6046285    | 0.1499618  | 0.2160386  | 0.02712749 | 0.07480611 | 0.04515735 |                       |
| 0.08953884   | 0.1557887  | 0.03712183 | 0.05508734 | 0          | 0.2094007  | 0.0488832             |
| 0            | 0.04268475 | 0.1350564  | 0.6405020  | 0.2575932  | 0.4046888  | 0.07800716            |
| 0.6509618    | 0.07409921 | 0.04643138 | 0.3182480  | 0.2805229  | 0.05169846 |                       |
| 0.03897792   | 0.1899204  | 0.1972252  | 0.06402713 | 0.03284171 | 0.06778769 |                       |
| 0.05621104   | 0.4143936  | 1.2773080  | 0.1292180  | 0.3199458  | 0          | 0.03187251            |
| 0.06740209   | 0          | 0.06896249 | 0          | 0.5766815  | 0.07625024 | 0.03456618            |
| 0.5134691    | 0.06616018 | 0.1026209  | 0.2318843  | 0.09751608 | 0.09315478 | 0                     |
| 0.09269325   | 0.2659176  | 0.06421218 | 0.6070637  | 0.1048981  | 0.376076   |                       |
| 2.9729080    | 0.09246554 | 0.1832708  | 0          | 0.1845683  | 0.01284615 | 0 0.1291421           |
| 0.01096344   | 0.09457315 |            |            |            |            |                       |
| TCGA-BT-A20U | 455 1      | 0.06712817 | 0          | 0.2434469  | 0.1448824  | 0.2060341             |
| 52.000320    | 0.07795885 | 0.1626307  | 0.2450135  | 0.4620765  | 0.02211098 |                       |
| 0.6107780    | 0.2399187  | 0.2073807  | 0.08464358 | 0.05553313 | 0.1059407  |                       |
| 0.08396758   | 0.6823495  | 0.01333162 | 0.03672367 | 0.09196884 | 1.663573   |                       |
| 48.288580    | 0.1648273  | 0.2405553  | 0          | 0          | 0          | 0.7446661 0.4448026 0 |
| 0.1442239    | 0.2845673  | 0.1519857  | 0.09542632 | 0.3231085  | 0.1591008  |                       |
| 0.1156193    | 0.07284511 | 0.09370867 | 0.06958169 | 0.1155893  | 0.0517606  |                       |
| 2.5074790    | 0.1419653  | 0.04213712 | 0.06945983 | 0.1802798  | 0.5832583  |                       |
| 5.6456050    | 0.1785887  | 0.9196884  | 0.1186880  | 0.2656557  | 0          | 0.07977184            |
| 0.7344734    | 0          | 0.07536639 | 0.2498366  | 0          | 0.01936876 | 0.03580506 0          |
| 0.4154403    | 0          | 0          | 0.2038538  | 0.1896406  | 0.1801868  | 1.6852530.2747121     |
| 0.08461133   | 0          | 0.04670187 | 0.1526668  | 0.02457727 | 0.05060487 | 0.1657746             |
| 0.08506501   | 0.1616777  | 0          | 0.08681053 | 0.1868258  | 0.1422836  | 0.3467678             |
| 0.2440712    | 0.1109414  | 0          | 0.05190879 | 0          | 0.05022618 | 0.1264428             |
| 0.1730686    | 0.08963065 | 0.1108235  | 1.8523020  | 0.1577785  | 0.04591787 | 0                     |
| 0.1081065    | 0.3706688  | 0.3060699  | 0.3486731  | 0.1098849  | 0.2474016  |                       |
| 0.1518146    | 1.26917    | 0.08838231 | 0.7899398  | 0.05645774 | 1.4283780  | 0.2965351             |
| 0.1496663    | 0.03168964 | 0.2260992  | 0.3291416  | 0.1199594  | 0.4291831  |                       |
| 0.1850102    | 0          | 0.1059407  | 0.1266867  | 1.8740670  | 0.03611753 | 0.6546935 0           |
| 0.4357062    | 0.1416484  | 0.1129155  | 0.3062669  | 0.08813681 | 0.821639   |                       |
| 0.08669194   | 0.1837830  | 0.4429913  | 0.07701274 | 0          | 0.2956141  | 0                     |
| 0.04888945   | 0.1111357  | 0          | 0.3382649  | 0.3682311  | 0.3192078  | 0.2530243             |

|              |             |             |             |            |             |            |
|--------------|-------------|-------------|-------------|------------|-------------|------------|
| 0.7004250    | 0.3050889   | 0.2391652   | 0.05737658  | 0.1181723  | 0.2841425   |            |
| 0.5052252    | 0           | 0.1520571   | 0.6199321   | 0.6181023  | 0.2681161   | 0.229272   |
| 0.7211193    | 1.7858870   | 0.07892848  | 0.03655444  | 0.1557264  | 0.4600665   | 0          |
| 0.1708936    | 0.1802158   | 0.02067052  | 0.4846337   | 0.1358854  | 0.04841696  |            |
| 0.9849435    | 0.4511802   | 0.1621597   | 0.3455091   | 0.05751178 | 0.3247146   |            |
| 0.1394692    | 0.1139291   | 0.0484416   | 0.3237679   | 0.2258310  | 0.07701274  |            |
| 0.4769552    | 0.02968124  | 0.3713219   | 0.3985316   | 0.2718238  | 0.09255907  |            |
| 0.05811218   | 0.05341625  | 0.04836776  | 0.08076169  | 0.1835508  | 0           | 0.1150573  |
| 0            | 0.1794303   | 0.1047170   | 0.1271713   | 0          | 0.2729398   | 0.2286793  |
| 0.1155893    | 0.1879942   | 0.7449975   | 0.03527432  | 0.06630982 | 0.2288055   |            |
| 0.1802798    | 0.1107478   | 0           | 0.09820402  | 0.07393634 | 0           | 0.07035311 |
| 0.07260698   | 0.06020731  | 0.5199438   | 0.8222519   | 0          | 0.1730057   | 0          |
| 0.2419003    | 0.1229816   | 0.04876921  | 0.1443879   | 0          | 1.3952330   | 0.2648751  |
| 1.7555120    | 0.1633423   | 0.01851181  | 1.3537810   | 0.1948754  | 0.1132474   | 0.3156367  |
| 0.2553195    | 0           | 0           | 0.2813024   | 1.4810780  | 0.1375546   | 2.06635    |
| 0            | 0.3718272   |             |             |            |             |            |
| 3.21261      | 0.1613973   | 0.1784547   | 0.09415208  | 0.2965351  | 0.01375943  |            |
| 0.1275975    | 0.3617688   | 0.1174288   | 0.1558411   |            |             |            |
| TCGA-XF-A9SW | 362         | 1           | 0.12173665  | 0.06509147 | 0           | 0.05630221 |
|              | 7.05249165  |             |             |            |             |            |
| 46.0993864   | 2.01463696  | 0.5529939   | 0           | 0.41898684 | 0           | 7.89499071 |
| 0.40789834   | 0.45130086  | 0.08223255  | 1.41891917  | 0.21613845 | 0.01427577  |            |
| 0.72920443   | 0.03626525  | 0           | 0           | 2.3314364  | 59.77133988 | 0.14011573 |
| 0.19631074   | 0.28023146  | 0           | 19.45857175 | 0.79265469 | 1.8149570   | 0.06538734 |
| 0.38704614   | 2.50494864  | 0.06489571  | 2.81258782  | 0          | 1.60626162  | 0.29723468 |
| 0.07578418   | 0           | 0.15721546  | 0.42240435  | 0.39351651 | 0.19309013  | 0          |
| 0.32121101   | 0.73560757  | 0.31732091  | 6.83985989  | 0.08096744 | 0.39090257  |            |
| 1.56049088   | 0           | 0.58715162  | 0           | 0.81103316 | 0.69928127  | 0.10788911 |
| 0            | 0.10788911  | 0           |             |            |             |            |
| 0.20388493   | 6.60412132  | 2.70024634  | 0.25161275  | 0.27371445 | 0.35315585  |            |
| 4.12878601   | 0.02698915  | 0.29357581  | 4.07858723  | 0.17823704 | 0.55327749  |            |
| 0.84069437   | 0.34524515  | 1.63342812  | 2.65514561  | 0.03460757 | 0.40113689  |            |
| 0.06882878   | 0.13528415  | 0.23139756  | 0.49477809  | 0          | 0           | 0.49762397 |
| 0            | 0.49762397  | 0           |             |            |             |            |
| 0.15721546   | 0.1106555   | 0           | 0           | 0.01765057 | 0           | 4.71985748 |
| 0.33320672   |             |             |             |            |             |            |
| 1.64776096   | 2.68198919  | 11.14772224 | 0.60651176  | 0.13591202 | 0.1249078   | 0          |
| 13.30693631  | 2.82326645  | 0.62443858  | 1.26463426  | 0.21173043 | 0.19628948  | 0          |
| 0.38360573   | 0           | 1.16394891  | 0           | 1.30973124 | 0.20166189  | 0.30534654 |
| 0.04310177   | 0           | 0.26860359  | 0.57105768  | 1.9503824  | 0.1258182   | 0.49794974 |
| 0            | 0.11748361  | 1.00948876  | 0.02456212  | 1.08127628 | 0           | 1.89253988 |
| 0.06421971   | 27.56739555 | 0.1499617   | 0           | 0.73709365 | 0           | 0.29834806 |
| 0.31967144   | 0.15063052  | 0           | 0           | 0.83094719 | 0           | 0.9974340  |
| 0.64965486   |             |             |             |            |             |            |
| 0.5520978    | 1.0851516   | 0           | 0           | 0.24345838 | 0.22418516  | 0          |
| 0            | 0.15607828  |             |             |            |             |            |
| 0            | 2.18998792  | 1.87272087  | 0.27878323  | 0.06893873 | 0.30661204  | 0.56046291 |
| 0.16899366   | 7.3078518   | 0           | 0.32386975  | 0          | 0.04971848  | 0.37066197 |
| 0.27115678   | 0.06365139  | 0.15495743  | 0.29107463  | 0.02811443 | 0.38774164  | 0          |
| 0.32926483   | 0.57413274  | 0.09204901  | 0.22055695  | 0.0783224  | 0.10951224  |            |
| 0.63093047   | 0.56908542  | 0.5423510   | 0.19765944  | 0.14678791 | 0           | 0.41898684 |

|                    |                    |                              |                           |                    |                       |
|--------------------|--------------------|------------------------------|---------------------------|--------------------|-----------------------|
| 0.46792714         | 0.04037011         | 0.18158851                   | 0.5003553                 | 4.94071628         | 0.02517832            |
| 0.07903964         | 1.0171364          | 0.13157209                   | 0.06865359                | 0.09078232         | 0 0.04012612          |
| 0.07597825         | 1.0168625          | 0.71213934                   | 0.51890554                | 0.12436785         | 3.05152169 0          |
| 0.93816618         | 0.47164639         | 0.17046337                   | 0.31178069                | 0 0.18037887       | 8.65018212            |
| 0.16346835         | 0 0                | 5.81345009                   | 0.3591515                 | 0 0                | 0.19750867 0.73700341 |
| 0.10349075         | 0.37592025         | 1.53285075                   | 0.09412354                | 0.70235226         | 0 0                   |
| 0.07959848         | 0 0.16990411       | 0 0                          | 0.70746958                | 0.05554137         | 0.02517832            |
| 0.46032687         | 0.09638335         | 0.09966662                   | 0.21817106                | 0.0631392          | 0.21713532 0          |
| 0.16879652         | 0.07747872         | 0.18709094                   | 0.90065841                | 0.2445079          | 0.67430694            |
| 14.72792387        | 0.02993455         | 0.24272016                   | 0.12805829                | 0.13444126         | 0.22457404            |
| 0.05784939         | 0.40521732         | 0.02129566                   | 0.06358887                |                    |                       |
| TCGA-FD-A3B3       | 974 1              | 0.1174680.1449439            | 0.03276994                | 0.2841771          | 0.4576087             |
| 23.809530.09444505 | 0.1116462          | 0.5276930.3731955            | 0.08036056                | 0.9775865          |                       |
| 0.2422126          | 1.2394320.1562566  | 0.2370710.2566887            | 0.2034489                 | 0.6691913          |                       |
| 0.01076726         | 0.01482991         | 0 1.12305617.033480.07904151 | 0.5439958                 |                    |                       |
| 0.2496048          | 0.03243809         | 2.1736410.3399379            | 0.2394962                 | 0.1581857          |                       |
| 0.3106193          | 1.0916940.2960467  | 0.04816934                   | 0.2087665                 | 0.1789788          |                       |
| 0.1700847          | 0.4286424          | 0.1442081                    | 0.05619756                | 0.1166944          | 0.1881197             |
| 0.1687635          | 0.1146581          | 0.08507998                   | 0.02243966                | 0.3640069          | 0.2355339             |
| 2.7319680.1201974  | 0.7892093          | 0.3275155                    | 0.4335241                 | 0.5095716          |                       |
| 0.06951019         | 0.1570423          | 0.3262581                    | 0.1281304                 | 0.06086957         | 0.1412462             |
| 0.1747233          | 0.2268257          | 0.1229011                    | 0.1354444                 | 0.4613535          | 0.9339805             |
| 0.04407239         | 0.2179089          | 0.1196586                    | 0.2315212                 | 0.7744148          | 0.3882741             |
| 0.0854203          | 0.1124568          | 0.04149058                   | 0.1541264                 | 0.1687233          | 0.08174191            |
| 0.1204989          | 0.06870265         | 0.1142564                    | 0.4146616                 | 0.2629216          | 0.1948991             |
| 0.2298304          | 0.04667776         | 0.3613936                    | 0.1344026                 | 0 0.06812662       | 0.08476104            |
| 0.09219344         | 0.6318762          | 0.09318578                   | 0.1447802                 | 0.8794983          | 0.4155582             |
| 0.07433392         | 0.1112565          | 0.1114178                    | 1.0477451.7363470.1853978 | 0.4693423          |                       |
| 0.09614406         | 0.1914880.08174191 | 0.3660870.08922733           | 0.07974924                | 0                  |                       |
| 0.9721582          | 0 0.09065833       | 0.0671845                    | 0.1217391                 | 0.1860816          | 0.1453275             |
| 1.0806670.3362023  | 0.1478428          | 0.0855629                    | 0.1651046                 | 0.8542030.02917028 |                       |
| 1.1047360          | 1.1408290.1144022  | 1.1399510.01978849           | 0 0.4376908               |                    |                       |
| 0.3500832          | 0.06942793         | 0.09491144                   | 0.1565293                 | 0.3109962          | 0.1182015             |
| 0.6764651          | 0.0761171          | 0.1184565                    | 0.08975863                | 0.02755493         | 0.2185594             |
| 0.09913381         | 0.1804654          | 0.08174191                   | 0.2828487                 | 0.06656127         | 0.07392141            |
| 0.03219358         | 0.2085306          | 0 1.1091891.47748            | 0.03310864                | 0.1023406          |                       |
| 0.1593096          | 0.5824111          | 0.2587961.1915370.3882741    | 0.6731055                 | 0.09561974         |                       |
| 0.1254734          | 0.1257722          | 0.4644651                    | 0.07559318                | 0.04600734         | 0.1410026             |
| 0.05843082         | 1.2087780.05487385 | 0.1042771                    | 0.5113854                 | 0.1503130.08731206 |                       |
| 0.2325416          | 0.09057617         | 0.2247903                    | 0.5632108                 | 0.04600734         | 0.2151809             |
| 0.8280539          | 0.1823921          | 0.2798966                    | 0.2368108                 | 0.03595803         | 0.4532162             |
| 0.5261395          | 1.10767            | 0.08223074                   | 0.07040134                | 0.2804202          | 0.1171925             |
| 0.1589910.1246602  | 0.09633868         | 0.06195056                   | 0.02255818                | 0.1811458          | 0                     |
| 0.4621940.1477008  | 1.23887            | 0.6464239                    | 0.4735256                 | 0.7468441          | 0.3627129             |



|                           |                                            |                           |                           |                   |                        |
|---------------------------|--------------------------------------------|---------------------------|---------------------------|-------------------|------------------------|
| 1.2728190.02848926        | 0.09372133                                 | 0.6958077                 | 0.6066782                 | 0.04472267        | 0                      |
| 0.2133934                 | 0.2687156                                  | 0.0553878                 | 0.0852309                 | 0.2052433         | 0.09725271             |
| 0.5018699                 | 0.9682331                                  | 0.2100499                 | 0.3074013                 | 0.1621904         | 0 0.09932593           |
| 0.05908259                | 0.1020379                                  | 0.1513352                 | 0                         | 0.1463705         | 1.0765060.1484136      |
| 0.02990209                | 0.7175305                                  | 0.1645450.08070362        | 0.1901479                 | 0.3561783         |                        |
| 0.03223407                | 0.04693423                                 | 0.24724                   | 0.8051285                 | 0.05554788        | 0.3962797              |
| 0.1270415                 | 1.6516824.5559190.1007268                  | 0.3170832                 | 0.07604181                | 0.1995801         |                        |
| 0.1500226                 | 0.1030540.3695244                          | 0.003161373               | 0.02517298                |                   |                        |
| TCGA-ZF-A9RC              | 2868                                       | 0                         | 0.1177988                 | 0.1049765         | 0.1424030.2905652      |
| 0.4820741                 | 35.696480                                  | 0.2568509                 | 0.5374475                 | 0                 | 0 3.1763240.7894078    |
| 2.32908                   | 0.1697548                                  | 0.7065227                 | 0.0464771                 | 0.04604661        | 0.7269989              |
| 0.01169739                | 0                                          | 0.16139                   | 4.94239344.792070.1265445 | 0.1688539         | 0.3615556              |
| 0.07048046                | 0.8699931                                  | 3.1248731.0407390.1964006 | 0.08436297                | 0.7906664         |                        |
| 0.5334193                 | 0.1674573                                  | 0.2268007                 | 0.1695116                 | 0.2173851         | 0.2100082              |
| 0.07111055                | 0.06105215                                 | 1.06491                   | 0                         | 9.81585           | 0.3736883 0.1848591    |
| 0.01218905                | 2.1354380.4605846                          | 3.6714540                 | 0.5043438                 | 0.1041388         |                        |
| 0.6279651.2819990.3524023 | 0.2834723                                  | 0.7733272                 | 0                         | 0.06612774        |                        |
| 1.8413710.2109074         | 0.7392596                                  | 0.3246316                 | 0.4120052                 | 0.7290286         |                        |
| 0.5073308                 | 0.0609376                                  | 0.2419936                 | 0.5095813                 | 0.3449431         | 0.8158177              |
| 11.630040.1855985         | 0.5344993                                  | 0.2868391                 | 0.06697622                | 0.1940806         |                        |
| 0.04440156                | 0.1745441                                  | 0                         | 0.5674350.5105461         | 0.03808451        | 0.157094               |
| 0.9987365                 | 0                                          | 0.2141522                 | 0.2920257                 | 0                 | 0.04554565 0 0.1842898 |
| 0.4091026                 | 0.1518533                                  | 0.2359303                 | 1.07385                   | 0.6922324         | 0.2953333              |
| 0.6849150                 | 1.1382539.5617943.6254380.2549430.03213827 | 0.37988                   | 0.2220078                 |                   |                        |
| 0.4242252                 | 0.1550963                                  | 0.05775888                | 0.04953698                | 3.1965760.5854159 |                        |
| 1.2475370.006951256       | 0                                          | 0.7508654                 | 0.6315262                 | 3.4245940.1623311 |                        |
| 0.3212282                 | 0.1859084                                  | 0.2324192                 | 1.4001290.07922533        | 0.5334077         |                        |
| 0.1265445                 | 0.6474367                                  | 0.04142824                | 1.9814790.4837027         | 0.07733272        |                        |
| 0.9356620                 | 0.2236754                                  | 0.1031103                 | 0.24293                   | 0.2027168         | 0.7704736              |
| 1.2450090.2205131         | 0.3431714                                  | 0.04875618                | 0.4190935                 | 0.2967994         |                        |
| 1.5616120                 | 0.04440156                                 | 0.2321689                 | 0                         | 0.2141522         | 0 1.0572070            |
| 0.9141421.1739960         | 0.08894498                                 | 0.6922858                 | 1.3558330.2582008         | 1.609337          |                        |
| 0.1581806                 | 0.7312513                                  | 0.1385064                 | 0.09622044                | 0.2049554         | 0.7804288              |
| 0.1231849                 | 0.4498349                                  | 0.1087105                 | 0.01813666                | 0                 | 0.1192282 0.1699274    |
| 0.3086450.3760795         | 0.1422817                                  | 0.9599924                 | 0.1867087                 | 2.7269960.1223727 |                        |
| 0.2998899                 | 0                                          | 0.3787725                 | 0.6439807                 | 0.2702891         | 0.7615120.02604283     |
| 0.8419657                 | 0.5715897                                  | 1.3876530.09745547        | 0.05098861                | 0.3280782         |                        |
| 0.04243869                | 0.02657313                                 | 0.4172673                 | 0                         | 0.1087188         | 0 1.0495680.09188046   |
| 0.1673734                 | 0.08022991                                 | 0.7902905                 | 0.05016177                | 1.2709460.2028399 |                        |
| 0.1832770.4525431         | 0.06190057                                 | 0.08727204                | 1.8846650                 | 0.09717201        | 0                      |
| 0.9067931                 | 0.3521677                                  | 0                         | 0                         | 0.1274132         | 0.05282691 0.4784614   |
| 0.5365463                 | 0.1521299                                  | 0.09107889                | 0                         | 0.03537456        | 0.2158122 0.1112564    |
| 0.1583605                 | 0.4384217                                  | 0.01440237                | 0.4403481.4832670         | 0.03248516        |                        |
| 0.2969577                 | 0.2331640.07598512                         | 0.1543628                 | 0.7942585                 | 0.4202231         |                        |

|              |             |            |            |            |            |
|--------------|-------------|------------|------------|------------|------------|
| 0.1019772    | 0.7549771   | 0.0999633  | 0.1206927  | 0.5110143  | 0.1182993  |
| 2.0118596    | 4.832360    | 0.1223019  | 0.2192109  | 0          | 0.2601849  |
| 0.01207276   | 0           | 0.4294533  | 0          | 0.02734752 |            |
| TCGA-E7-A6MD | 129         | 0          | 0.2954153  | 0.1579558  | 0          |
| 0.3643391    | 0.1511179   | 31.6244    | 0.1143595  | 0.2624231  | 0.1198052  |
| 0.4518866    | 0           | 0.3519419  | 0.5780013  | 0.1152965  | 0.09310027 |
| 0.03885168   | 0.5773774   | 0.5362248  | 0.08800396 | 0.05387073 | 0.06745553 |
| 6.323351     | 133.918     | 0.1284502  | 0.3352320  | 0.3022358  | 0.1767506  |
| 0.2077871    | 1.614803    | 0.2718710  | 0.1641775  | 0.1410434  | 0.3130784  |
| 0.2295085    | 0.1224850   | 0.2843848  | 0.3750885  | 0.1574899  | 0.06869446 |
| 0.1839035    | 0.1658652   | 0.2119504  | 0.1518575  | 10.940510  | 0.05206299 |
| 0.1236237    | 0.1222705   | 1.1239390  | 0.2566782  | 4.426164   | 0.1309878  |
| 0.7588747    | 0.2031236   | 0          | 0.54801    | 0          | 0.06874867 |
| 1.2928980    | 0.2211131   | 0.4031397  | 0.1763042  | 0.1160175  | 0.2188467  |
| 0.2460059    | 0.6475068   | 1.4313170  | 0.01455419 | 0.1495188  | 0.1130138  |
| 0.3243925    | 0.85246     | 4.1305560  | 0.4964727  | 0.0893610  | 0.1575683  |
| 0.1306376    | 0.2703969   | 0.3711668  | 0.2431782  | 0.1247837  | 0.3261067  |
| 0            | 0.06367211  | 0.07422425 | 0.3130784  | 0.2119504  | 0.2983610  |
| 0.09861084   | 0.09518265  | 0.05131678 | 0.07702686 | 0.3883523  | 0.3808171  |
| 0.1314811    | 0.7209598   | 1.9624090  | 0.05400468 | 0          | 0.05059165 |
| 0.3171674    | 1.1418581   | 5.340170   | 0.2131150  | 0.2283559  | 0.4687699  |
| 0.11135      | 0.7979025   | 0.09723743 | 0.1448475  | 0.2070477  | 1.7304030  |
| 0.3293230    | 0.005810776 | 0.05527828 | 0.3379774  | 0.5279128  | 0.5629166  |
| 0.6106397    | 0           | 0          | 0.2829827  | 2.6402330  | 0.06622697 |
| 0.4973416    | 0.05289127  | 1.5360140  | 0.06926237 | 0.5383239  | 0.3504302  |
| 0            | 1.1924580   | 0.6358513  | 0.1174044  | 0.2585795  | 0.4467604  |
| 0.3954007    | 1.58869     | 2.7174940  | 0.09216696 | 0.1792924  | 0.08151369 |
| 0.2001906    | 0.1984832   | 0.1800554  | 0.1873011  | 0.07423336 | 0.6792707  |
| 0            | 0.4922956   | 0.1169455  | 0.1262504  | 0          | 0.7641604  |
| 0.9325151    | 0.03006739  | 0.1858799  | 0.3720238  | 0.3777948  | 0.6331255  |
| 0.4752404    | 0.6170648   | 0.4366258  | 0.05789094 | 0.09383934 | 0.1142192  |
| 0.5848971    | 0.1372989   | 0.04178125 | 0.09087459 | 0.1212881  | 0.6691007  |
| 0.04983331   | 0.2485836   | 0.5160124  | 0.8355805  | 0.1982296  | 0.8024882  |
| 0.2784054    | 1.1908270   | 0.4091808  | 0.0835625  | 0.14212    | 0.712413   |
| 0.6625525    | 0.2824291   | 0.6939209  | 0          | 0.3947545  | 0.3710054  |
| 0.8337377    | 0.3394422   | 0.1278690  | 0.2350723  | 0.3902343  | 0.1777066  |
| 0.2692545    | 0.05832621  | 0.1038646  | 0          | 0.1754734  | 0          |
| 0            | 0           | 0.1341335  | 1.635557   | 0.5031818  | 0.6070998  |
| 0.9749720    | 0.06128284  | 0.3222514  | 0.1811063  | 0.2431782  | 0.9418460  |
| 0.04407606   | 0.3249167   | 0.06124252 | 0.3155547  | 0.2556529  | 0.3353337  |
| 0.2064049    | 0.5857980   | 0.04415969 | 0.4836739  | 0.9477120  | 0.06358513 |
| 0.05075716   | 0           | 0.1182829  | 0          | 0.1001568  | 0.05295144 |
| 0            | 0.0120394   | 0.01022503 | 3.4335970  | 0.1497565  | 0.1629323  |
| 0.1861773    | 0.1039516   | 0.06840441 | 0.3605439  | 0.4426306  | 0.02927315 |
| 0.05683067   | 0.3823066   | 0.04178125 | 0.06726057 | 0.5851687  | 0.2307438  |
| 0.8181618    | 7.1798560   | 0.1452828  | 0.1308895  | 0          | 0.07249893 |
| 0.20184      | 0.03119592  | 0.5462948  | 0.01148392 | 0.3200493  |            |
| TCGA-E5-A4TZ | 467         | 1          | 0.0655407  | 0.3270774  | 0.1584599  |
| 0.5052007    | 0           |            |            |            |            |

|                    |                           |                           |                           |                           |                         |
|--------------------|---------------------------|---------------------------|---------------------------|---------------------------|-------------------------|
| 31.828310          | 0.1508455                 | 0.2591543                 | 0.3759576                 | 0.2590571                 | 0.05876285              |
| 0.3220869          | 0.5264389                 | 0.3836945                 | 0.02904636                | 0.02585885                | 0.2459457               |
| 0.04758665         | 0.2017534                 | 0.05378282                | 0.1795879                 | 4.34938928.380980.2162489 |                         |
| 0.2818399          | 0                         | 0.2744966                 | 0                         | 1.0273620                 | 0.1365913 0.0704066     |
| 1.3660350.1614849  | 0.1863393                 | 0.2839207                 | 0.1664340.07660063        | 0.04572157                |                         |
| 0.1446572          | 0.1868245                 | 0.1692836                 | 0.2274145                 | 14.265360.2425641         |                         |
| 0.2057032          | 0.01356344                | 0.5280495                 | 0.6264117                 | 1.90839                   | 0.1453044               |
| 0.7856969          | 0                         | 2.9115510.8672797         | 0.7002465                 | 0.01362994                | 1.3624980               |
| 0.2943364          | 0.7805709                 | 0                         | 0.01103125                | 0.3000590.1964835         | 0.7351786               |
| 0.1058505          | 0.009686962               | 0.2809878                 | 0.3008784                 | 0.4478107                 | 1.418448                |
| 1.0728630.08261042 | 0                         | 0.01823898                | 0.07452824                | 0                         | 0.02470407 0.5179336    |
| 0.4567935          | 0.2565132                 | 2.2724550.3390304         | 0.08360352                | 0.2778377                 |                         |
| 0.08464182         | 0.5163151                 | 0                         | 0.1640832                 | 0.06335155                | 0.3073982 0.01337411    |
| 0.5593949          | 0.3379517                 | 0                         | 0.1905309                 | 2.12666                   | 0.01026982 0.04483199 0 |
| 0.07916245         | 1.6285640.3486372         | 0.1134758                 | 0.03576208                | 0.8957513                 |                         |
| 0.1482244          | 0.7867659                 | 0                         | 0.06427159                | 0.1378065                 | 2.8910510.07238062      |
| 0.5845077          | 0                         | 0.0735841                 | 0.8033949                 | 0.5563320.02957884        | 0.6322226 0             |
| 0.02585885         | 0.2248922                 | 2.06526                   | 0.05289512                | 1.32408                   | 0.1760165 0.3087599     |
| 0                  | 0.05512261                | 1.8419890.04302626        | 1.2374491.7774780.1157657 | 0.02868417                |                         |
| 0.1351610.1879788  | 2.4863140.9043532         | 0.1840331                 | 0.04773329                | 0.02712689                |                         |
| 0                  | 0.8917169                 | 0.7490064                 | 0.6233180.1729285         | 0.4179151                 | 0 0.6851104             |
| 0.1556729          | 0.1680592                 | 0                         | 0.9247435                 | 0.85917                   | 0.02001221 0.1732047    |
| 0.6052717          | 1.0058091.2386450.1167914 | 0.6453939                 | 1.1624350.2311859         |                           |                         |
| 0.2230624          | 0.01900546                | 0.7561309                 | 0.0913832                 | 0.1668523                 | 0.08797701              |
| 0.03027255         | 0.09741794                | 0.2653439                 | 0.1812093                 | 0.5151703                 | 0.4570297               |
| 0.3694248          | 0.3092268                 | 0.6401297                 | 1.4991250                 | 0.05561743                | 0.2601282               |
| 0.05268521         | 0.1102452                 | 0.03759576                | 1.3626750.01448967        | 1.2464890.3030545         |                         |
| 0.03619031         | 0.1265183                 | 0.1702138                 | 0.03911478                | 0.07083591                | 0.1330624               |
| 0.2728881          | 0.03882068                | 0.2822811                 | 0                         | 0.6423524                 | 0.2556015 0.06208198    |
| 0.3124674          | 0.04929976                | 0.5023606                 | 0.4040727                 | 1.1003440.3467027         |                         |
| 0.5222212          | 0.08610035                | 0.09711256                | 0.03191352                | 0.1466804                 | 0.2973542 0             |
| 0.04337503         | 0.1650008                 | 0.06695729                | 0.06868937                | 0.03544497                | 0 0.6314645             |
| 2.9953470.04232091 | 0.1182401                 | 0                         | 0.1377715                 | 0.06003664                | 0.1333245               |
| 0.1938384          | 0                         | 0.03205267                | 0.2994446                 | 1.6505150.03986989        | 0.0903702               |
| 4.6261830.1297274  | 0.05853667                | 0.5254087                 | 0.3739224                 | 0.07793435                | 0                       |
| 0.5452611          | 0.02780871                | 0.1790688                 | 1.3242180                 | 0.8168266                 | 2.011138                |
| 0.1038599          | 0.05227037                | 0.09192554                | 0.2412687                 | 0.006717022               | 0.04152668              |
| 0.5402090.07261278 | 0.2586647                 |                           |                           |                           |                         |
| TCGA-ZF-A9R4       | 921 0                     | 0.2901179                 | 0.05909462                | 0.1002039                 | 0.3066907 0             |
| 63.153960          | 0.1506140.3529706         | 0.1901929                 | 0.6689223                 | 0.06606109                |                         |
| 0.2962551          | 0.6145840.1418474         | 0.03183751                | 0                         | 0                         | 0.06018392 0.05761725   |
| 0                  | 0.05678222                | 6.23129463.711580.2416932 | 0                         | 0.4452242                 | 0.2975676 0             |
| 1.6391520          | 0.3109503                 | 0                         | 0.9077516                 | 0.2759914                 | 0.2356676 0.1994895     |
| 0.2104928          | 0.04588985                | 0.01285003                | 0.1047670.1074006         | 0.2854625                 | 0                       |

|                            |                           |                           |                           |                           |            |             |
|----------------------------|---------------------------|---------------------------|---------------------------|---------------------------|------------|-------------|
| 29.771830.4820772          | 0.2341418                 | 0.0171540.7791424         | 0.4321294                 | 3.966011                  |            |             |
| 0.2940318                  | 1.2066220.0366394         | 0                         | 0.6765731                 | 0                         | 0.02955102 | 1.4964480   |
| 0.0930635                  | 0.5553033                 | 0                         | 0.00996534                | 0.1252690.3313297         | 0.6091775  |             |
| 0.2231192                  | 0.006125662               | 0.2591252                 | 0.02927137                | 0.2932917                 | 1.758065   |             |
| 3.9858170.1044793          | 0.01074595                | 0.02306725                | 0.1413864                 | 0                         | 0.2499504  |             |
| 0.1637606                  | 0.2100790.1996419         | 0                         | 0.02679872                | 0.09131684                | 0.3513877  |             |
| 0.1070484                  | 0.5525347                 | 0                         | 0.04150395                | 0.2003054                 | 0.04319706 | 0.008457274 |
| 0.6635671                  | 0                         | 0                         | 0.4164892                 | 0.9530205                 | 0          | 0           |
| 2.1731520.03587888         | 0.1243801                 | 0.6237189                 | 0.06248761                | 1.1940490.1091357         |            |             |
| 0.1219286                  | 0.1045722                 | 1.4169710                 | 0.2772151                 | 0                         | 0.0930635  | 0.2845001   |
| 0.5184464                  | 0.02493936                | 0.9709263                 | 0                         | 0.06540857                | 0.1777665  | 1.157062    |
| 0.1895434                  | 0.3175955                 | 0.1335673                 | 0.6508261                 | 0.02915159                | 0          | 0.06050924  |
| 0                          | 0.8310852                 | 0.1605727                 | 0.1830144                 | 0.03627753                | 0.1709412  | 0.1901929   |
| 1.7348960.8395657          | 0.2715427                 | 0                         | 0                         | 0                         | 0.5430027  | 1.0230680   |
| 0.5189369                  | 0.05088277                | 0.4144010                 | 0.2833977                 | 0.1094406                 | 0.4678177  |             |
| 0.6444260.2784090.03129372 | 0.2783641.3356730.8640213 | 0.05539076                |                           |                           |            |             |
| 0.9275505                  | 0.7718334                 | 0.1949240.06770691        | 0.02403665                | 0.8900181                 |            |             |
| 0.05778722                 | 0.1406813                 | 0.06954159                | 0.03828638                | 0.08800479                | 0.08389664 |             |
| 0.2092509                  | 1.0859130.3203462         | 0.3337286                 | 1.1021520.3337769         | 1.0711420                 |            |             |
| 0                          | 0.1794492                 | 0.0666322                 | 0.6274334                 | 0.04754822                | 0.7723949  | 0           |
| 0.8629330.5299674          | 0.01525691                | 0.2971625                 | 0.1076366                 | 0.1484081                 |            |             |
| 0.0895878                  | 0.2617799                 | 0.2318023                 | 0.04909741                | 0.1475387                 | 0          | 0.3323446   |
| 0.06465302                 | 0                         | 0.2258198                 | 0.1364971                 | 0.5647529                 | 0.5962133  | 1.462995    |
| 0.3740001                  | 0.3774086                 | 0                         | 0.04094016                | 0.1095533                 | 0.03710202 | 0.2051295   |
| 0                          | 0.002887232               | 0.2086803                 | 0                         | 0                         | 0.1344842  | 0           |
| 0                          | 0.1922670.1062741         | 0.1493509                 | 0.07592971                | 0.09635348                | 0.1782923  | 0           |
| 0                          | 0.008607147               | 3.29174                   | 0.2016975                 | 0.1485812                 | 0.2611982  | 0.218759    |
| 0.09048437                 | 0.7443638                 | 0.4155860.02464134        | 0                         | 0.4188707                 | 0          | 0.08492717  |
| 0.5073564                  | 0                         | 1.1478442.6135380.1358835 | 0.1322151                 | 0.05813017                |            |             |
| 0.2441105                  | 0.05097103                | 0                         | 0.9459895                 | 0.004833424               | 0.1635696  |             |
| TCGA-GV-A3QH               | 258                       | 1                         | 0.2199845                 | 0.5153038                 | 0.1139708  | 0.4844811   |
| 25.224970                  | 0.06852267                | 0.2485257                 | 0.1442155                 | 0.2277298                 | 0.02295856 |             |
| 0.5896749                  | 1.4951280.4245672         | 0.04456815                | 0.04959663                | 0.06879215                |            |             |
| 0.0228175                  | 0.02496503                | 0.08596176                | 0                         | 3.10103418.851040.1687976 | 0          |             |
| 0.2893674                  | 0.1128166                 | 0                         | 0.8488109                 | 0                         | 0.3929680  | 2.17595     |
| 0.1898656                  | 0.5142999                 | 0.5852296                 | 0.1237205                 | 0.004871824               | 0.07706916 |             |
| 0.3908998                  | 0.1623409                 | 0                         | 24.200140.1993851         | 0.2564469                 | 0.01951076 |             |
| 0.8861876                  | 1.63833                   | 2.5941530.4180354         | 1.6414960.06482502        | 0.05584282                |            |             |
| 1.0804460.6983887          | 0.01867277                | 0.5501552                 | 0.07427096                | 0.07056623                |            |             |
| 0.3274940                  | 0.004533785               | 0.1815916                 | 0.59668                   | 0.4376030.03383643        | 0.01393451 |             |
| 0.2133255                  | 0.1276229                 | 0.5444747                 | 2.3396714.1154470.2376671 | 0.08148213                |            |             |
| 0.004372738                | 0.1191194                 | 0                         | 0.1184545                 | 0.1552162                 | 0.5973535  | 0.2838381   |
| 0.1602394                  | 0.2438445                 | 0.03644306                | 0                         | 0.1623409                 | 0.1904384  | 0           |
| 0.1258830.09113001         | 0.04913183                | 0.01710081                | 0.6844397                 | 0.02700762                | 0          |             |

|              |             |             |            |            |            |            |            |
|--------------|-------------|-------------|------------|------------|------------|------------|------------|
| 0.3000163    | 2.0554990   | 0           | 0          | 0.2277474  | 1.7353030  | 0.5015081  | 0.02720548 |
| 0.1200339    | 0.1833851   | 0.2132181   | 1.0845920  | 0.3517009  | 0.1540891  |            |            |
| 0.2378785    | 2.40432     | 0.1041182   | 0.7006694  | 0.05934259 | 0.07056623 |            |            |
| 0.4314495    | 0.2527178   | 0.007091434 | 2.4684810  | 0.07439495 | 0.3261991  |            |            |
| 1.6678390    | 0.2705374   | 0.3064977   | 0.2363167  | 0.4342754  | 0          | 0.2114476  |            |
| 0.4358759    | 0.04126164  | 0.5565207   | 1.3798980  | 0.0888143  | 0.02750776 |            |            |
| 0.3888532    | 0.07210773  | 1.09625     | 0.4244055  | 0.1764854  | 0.02288781 |            |            |
| 0.05202869   | 0           | 0.6967851   | 0.9481399  | 0.3885402  | 0.2369090  | 0.601163   |            |
| 0.1543293    | 0.6855781   | 0.3358988   | 0.4297777  | 0.02766144 | 0.4434087  |            |            |
| 3.4516830    | 0.3262548   | 0.04745748  | 0.6859842  | 0.5560781  | 0.02865    | 0.07933436 | 1.15345    |
| 1.3934510    | 0.1108522   | 0.2994797   | 0.1093560  | 0.5528143  | 0.08763535 | 0.4800277  |            |
| 0.1265533    | 0.0193540   | 0.1067687   | 0.6043461  | 0.2417773  | 0.5928502  |            |            |
| 0.2323443    | 0.4301895   | 0.5930893   | 0.1777010  | 0.7904862  | 0.1632329  |            |            |
| 0.05333641   | 0.2041034   | 0.1010489   | 0.7664974  | 0          | 1.2225970  | 0.01389541 |            |
| 0.5996367    | 0.4843758   | 0.03470605  | 0.3813211  | 0.1360274  | 1.187835   |            |            |
| 0.2490794    | 0.4158985   | 0.3554382   | 0.1861427  | 0.1091103  | 0.02615175 |            |            |
| 0.3080040    | 0.04902373  | 0.02976792  | 0.1712299  | 0.1290558  | 0.5085219  |            |            |
| 0.2583338    | 2.5162840   | 0.4987253   | 0.8764062  | 0.04954149 | 0.1241730  | 0.2470233  |            |
| 0.02813294   | 0.5443944   | 0           | 0.01094635 | 0.2076818  | 0.1284224  | 0          | 0          |
| 0.02818632   | 2.3035281   | 0.4103720   | 0.4049671  | 0          | 0.3774890  | 0.3454463  |            |
| 0.2739783    | 0.3041814   | 0           | 0          | 0.7048562  | 6.0877830  | 0.05735209 | 0.2686581  |
| 0.2376671    | 0.1327008   | 0.1528145   | 0.1647236  | 0.9127667  | 0.01868452 |            |            |
| 0.1813699    | 0.8676242   | 0           | 0.2146559  | 0.6648343  | 0          | 0.9864111  |            |
| 1.2828220    | 0.1099038   | 0.05012663  | 0.1322332  | 0.6015716  | 0.00644154 |            |            |
| 0.03982357   | 0.3088397   | 0.01099496  | 0.1386197  |            |            |            |            |
| TCGA-BT-A0YX | 400         | 1           | 0.0298943  | 0.03196841 | 0.0542073  | 0.1659104  |            |
| 0.09175349   | 40.963250   | 0.1041526   | 0.1303643  | 0.08183419 | 0.4115545  |            |            |
| 0.01477007   | 0.1667730   | 0.1201988   | 0.1662357  | 0.05654169 | 0.07419197 |            |            |
| 0.1415363    | 0.3926309   | 0.1953461   | 0.03562194 | 0.02453131 | 0          | 1.124773   |            |
| 29.5073      | 0.1376302   | 0.1606903   | 0.06881512 | 0.05365837 | 0          | 0.2811589  |            |
| 0.04952116   | 0.1121432   | 0.1605686   | 0.3484987  | 0.1134703  | 0.1434252  | 0          |            |
| 0.08350488   | 0.03861671  | 0.07646626  | 0.08628256 | 0.05810048 | 0          | 0          |            |
| 2.1474220    | 0.1896649   | 0.05629497  | 0.03711919 | 0.2408529  | 0.3896152  | 0.6240290  |            |
| 0.6143495    | 0.1057110   | 0.2440038   | 0.3449467  | 0.01332185 | 0.2453131  | 0          |            |
| 0            | 0.1668902   | 0           | 0.0215638  | 0.1554650  | 0.3468913  | 0.1931212  |            |
| 0.02651039   | 0.07209203  | 0.03958733  | 0.08753766 | 1.28102    | 0.7799047  |            |            |
| 0.05652015   | 0.1046382   | 0.02495738  | 0.1019810  | 0.01641755 | 0          | 0.110737   |            |
| 0.2272928    | 0.2970008   | 0.9831579   | 0.1159784  | 0.1663989  | 0.1900902  |            |            |
| 0.03860666   | 0.2173852   | 0           | 0.04490478 | 0.06934988 | 0.04673662 | 0          |            |
| 0.1161373    | 0           | 0.05987304  | 0.7338607  | 1.7414320  | 0.05621099 | 0          | 0.09215242 |
| 0.07221484   | 0.5942539   | 0.1703783   | 0.03881878 | 0.1039873  | 0.1928075  |            |            |
| 0.1352157    | 0.1749433   | 0.05903915  | 0          | 0.07542725 | 0.5789241  | 0.04952116 |            |
| 0            | 0.005292149 | 0           | 0.1319194  | 0.2403976  | 0.1686430  | 0.1235863  | 0          |
| 0.03538407   | 0.06923975  | 1.3634250   | 0.03618962 | 0.4217145  | 0          | 0.5492407  |            |

|              |            |            |            |            |             |            |
|--------------|------------|------------|------------|------------|-------------|------------|
| 0.03154026   | 0.07542725 | 0.2782363  | 0          | 0.5838858  | 0.05790999  | 0.04752255 |
| 0.0392501    | 0.2959170  | 0.05144431 | 0.03910527 | 0.4081036  | 0.08394082  |            |
| 0.06531604   | 0          | 0          | 0.1355761  | 0.2459774  | 0.1279380   | 0.1352157  |
| 0            | 0.1630389  | 0.1065078  | 0.07665481 | 0.03946938 | 0.7592259   | 0.7850021  |
| 0            | 0.1015738  | 0          | 0.06881512 | 0.5460392  | 0.05327064  | 0.2007108  |
| 0.9146084    | 0.05272402 | 0.0732548  | 0          | 0.2458586  | 0.1563057   | 0.07610433 |
| 0.1053357    | 0.04142356 | 0.5332090  | 0.04538556 | 0.05390401 | 0.4229612   |            |
| 0.5952398    | 0.03610742 | 0.03846653 | 0.06531012 | 0.1921189  | 0.09316508  |            |
| 0.03805217   | 0.03235886 | 0.5767362  | 0.03771362 | 0.1028886  | 0.2507054   |            |
| 0.01982699   | 0.1923023  | 0.3020551  | 0.1485635  | 0.1483901  | 0.1164564   |            |
| 0.08920478   | 0.2584763  | 0.07417932 | 0.1616241  | 0.1593613  | 0.07291651  |            |
| 0.03731524   | 0.07990596 | 0.06995068 | 0.04247506 | 0.1832426  | 0.2060251   |            |
| 0.3437036    | 0.09215242 | 0.5790999  | 0.08371977 | 0.3700522  | 0.01178158  |            |
| 0.04429479   | 0.1341262  | 0.1204265  | 0          | 0          | 0.04060954  | 0.2469464  |
| 0.03054043   | 0.09399138 | 0          | 0          | 0.3134361  | 0.4477179   | 0.05790999 |
| 0.0924539    | 0.03832741 | 0.1346573  | 0          | 0.08470204 | 0.09645077  | 0          |
| 0.2631564    | 0.2514352  | 1.0858120  | 0.05455613 | 0.06182922 | 1.6390840   | 0.1656788  |
| 0.03559951   | 0.1520846  | 0.2325719  | 0.07998134 | 0.02587919 | 0.1658023   |            |
| 0.1141565    | 0.06125739 | 0.7407877  | 0.03002133 | 0.3311728  | 1.300233    |            |
| 0.0539065    | 0.1430487  | 0          | 0.1320564  | 0.07353012 | 0.0284116   | 0.08529198 |
| 1.1400250    | 0.08328116 |            |            |            |             |            |
| TCGA-FT-A3EE | 99         | 1          | 0.03193471 | 0.06830077 | 0           | 0.09600202 |
| 51.234050    | 0.1508673  | 0.07284976 | 0.1099112  | 0.01577819 | 0.3292703   |            |
| 0.1926043    | 0.3699625  | 0.07334394 | 0.1033157  | 0.1133975  | 0.0561736   |            |
| 0.3130190    | 0.03805329 | 0.4323937  | 0.03281407 | 1.75901755 | 0.3509      | 0.02940481 |
| 0.05149744   | 0.1102681  | 0.02866039 | 0          | 0.8201843  | 0           | 0.09983116 |
| 0.08576404   | 0.2876749  | 0.08612653 | 0.1702384  | 0.09222691 | 0.1256972   |            |
| 0.04125246   | 0.02970378 | 0.08042433 | 0.08689251 | 0.06186259 | 0.05540385  |            |
| 1.2731660    | 0.1013052  | 0.1653777  | 0.02973954 | 0.3537767  | 0.3953975   | 3.92709    |
| 0.06371962   | 1.35358    | 0.4728785  | 0          | 0.2784302  | 0.08188682  | 0.01138489 |
| 0.3930852    | 0.02830213 | 0          | 0.5526716  | 0.03430562 | 0.01266959  | 0.12988    |
| 0.1196708    | 0.3149828  | 0.3094538  | 0.01415992 | 0.2267593  | 0.04228933  |            |
| 0.1052015    | 1.0367081  | 0.0291680  | 0.04528341 | 0          | 0.003332603 | 0.1180201  |
| 0.03507623   | 0.1083335  | 0.07097714 | 0.06070163 | 0.7499164  | 0           | 0.154868   |
| 0.1722014    | 0          | 0.06186259 | 0.3483339  | 0.1187502  | 0.02398486  | 0.05093226 |
| 0.02496329   | 0.09611892 | 0.2763247  | 0          | 0          | 0.3077347   | 1.28507    |
| 0.01638329   | 0.0492211  | 0.0771438  | 0.3703083  | 0.1092044  | 0.04146833  |            |
| 0.05227522   | 0.2059674  | 0.1986115  | 0.3450165  | 0.1261376  | 0.02348725  |            |
| 0.0604316    | 0.8417630  | 0.05290118 | 0.2670013  | 0.08197372 | 0.1075616   |            |
| 0.2113852    | 0.1498034  | 0.1657413  | 0.3300540  | 0.03779918 | 0.1068393   |            |
| 0.9599554    | 0.01288657 | 0.7258027  | 0.1286461  | 0.4488223  | 0.05053952  |            |
| 0.1007193    | 0.4239856  | 0          | 1.09778    | 0.2474503  | 0.04442039  | 0.08385817 |
| 0.3161146    | 0.0549556  | 0.2506462  | 0.5554953  | 0          | 0           | 0.01982636 |
| 0.02434592   | 0.1206914  | 0.1970748  | 0.06833513 | 0.03611117 | 0.2138106   |            |

|              |            |             |            |             |             |
|--------------|------------|-------------|------------|-------------|-------------|
| 0.3528578    | 0.1523961  | 0.2275548   | 0.06141512 | 0.02108166  | 0.6082847   |
| 0.6319076    | 0.04387928 | 0.1808443   | 0.2211890  | 0.4043162   | 0.2379899   |
| 0.1564931    | 0.5145842  | 1.1257130   | 0.02816133 | 0.05216983  | 0.08334371  |
| 0.3064127    | 0.05009227 | 0.04064938  | 0.1004691  | 0.5457610   | 0.3458302   |
| 0.04848331   | 0.09213309 | 0.3263217   | 0.5875736  | 0.1542876   | 0.2670982   |
| 0.08413177   | 0.1919911  | 0.07464299  | 0.02032469 | 0.13827     | 0           |
| 0.4121670    | 0.4882083  | 0           | 0.2500859  | 0.3636892   | 0.1498867   |
| 0.08293665   | 0.0762347  | 0.3106332   | 0.05402889 | 0.3334040   | 0.02837307  |
| 0.03684146   | 0          | 0.09602986  | 0.03736255 | 0           | 0.1304998   |
| 0.3059690    | 0.2214950  | 0.3917964   | 0.0447170  | 0.3544156   | 0.04405001  |
| 2.9039360    | 0.1715281  | 0.07902864  | 0.08937516 | 0.1868733   | 0.3994709   |
| 0.1304998    | 0.05020334 | 0.05181169  | 0.04296339 | 0.6741835   | 0.2600936   |
| 0.03093129   | 0.1604919  | 0.02047171  | 0.05753928 | 0.08775855  | 0.1322448   |
| 0.06439621   | 0.08914058 | 0           | 0          | 1.2759160   | 0.1311296   |
| 0.1390613    | 0.05466715 | 0.1883117   | 0.2236013  | 0.1281606   | 0.0552911   |
| 0.1830229    | 0.1422728  | 0.03271923  | 1.0276160  | 0.03207041  | 0.7738865   |
| 1.9418740    | 0.05758584 | 0.07640621  | 0          | 0.07053491  | 0.009818607 |
| 0.1290775    | 0          | 0.08340511  |            |             |             |
| TCGA-ZF-A9RL | 2703       | 0           | 0.2156781  | 0.5958256   | 0.1303630   |
| 17.714050    | 0.1175672  | 0.4920069   | 0.1237182  | 0.6571292   | 0.08952494  |
| 1.6862170    | 0.7662445  | 0.1942527   | 0.1051427  | 0.08509502  | 0.09273753  |
| 0.1820426    | 0.3244740  | 0.07387234  | 5.239344   | 36.660190   | 0.1489439   |
| 0.08274662   | 0.06452141 | 0           | 1.19628    | 0           | 0.1348463   |
| 0.1149742    | 0.4671561  | 0.1643078   | 0.03316757 | 0.008358793 | 0.1139219   |
| 0.1257531    | 0.2321126  | 0           | 15.286410  | 0.1710467   | 0.1353836   |
| 0.7964362    | 0.6090395  | 4.0012350   | 0.1912642  | 0.7848937   | 0.0158890   |
| 1.24029      | 0          | 0.02402825  | 3.0677540  | 0           | 0.4013537   |
| 0.5224693    | 0.9159858  | 0.5839663   | 0.2322183  | 0           | 0.2889564   |
| 0.8026038    | 0.7001637  | 4.4683170   | 0.1699064  | 0.4893080   | 0.2861294   |
| 0.2032373    | 0.3728353  | 0.1366539   | 0.1623309  | 0           | 0.1045935   |
| 0.4571472    | 0          | 0.6534861   | 0          | 0           | 0.2084741   |
| 1.0473680    | 0.04633811 | 0           | 0.2167371  | 2.0113240   | 0.008448851 |
| 5.83557      | 2.0077360  | 0.09335516  | 0.1544604  | 1.9375290   | 0.3658272   |
| 0.3194619    | 0          | 0.1360461   | 0.7016420  | 1.1420590   | 0.006363535 |
| 1.0046330    | 0.04817762 | 0.008111381 | 0.6687278  | 0           | 0           |
| 0.1450538    | 1.1456470  | 0.1158453   | 0.1693419  | 0           | 0.1360460   |
| 0.2123832    | 3.309470   | 0.6267039   | 0.2761931  | 0.1415887   | 0.1334343   |
| 0.7993751    | 0.9814469  | 0           | 0          | 0           | 0           |
| 0.08129492   | 0.5250970  | 0.1985919   | 0.4411031  | 0.06403507  | 0.6913009   |
| 0.09491977   | 0.6086199  | 1.6812260   | 0.3292760  | 0.2442744   | 0.09053627  |
| 1.5442850    | 0.1201035  | 0.6757641   | 0.5737927  | 0.06339791  | 0.1468085   |
| 0.09381334   | 0.8745786  | 0.07517982  | 0.4118018  | 0.08142479  | 0.1162226   |
| 0.04579687   | 0.5457379  | 0.2074137   | 0.6216087  | 0.2989821   | 0.564425    |
| 0.6013021    | 0.3418454  | 1.3115580   | 0.1680393  | 0.04575576  | 0.5836479   |

|              |            |            |            |            |            |             |            |
|--------------|------------|------------|------------|------------|------------|-------------|------------|
|              | 0.08668693 | 0.6802302  | 0.06185912 | 1.0299890  | 0.02384093 | 1.13606     | 0.855688   |
|              | 0.1587910  | 0.2973857  | 0.09335516 | 0.1072641  | 0.4273560  | 0.40544     | 0.7103633  |
|              | 0.4471221  | 0.1232236  | 0          | 1.1289730  | 0.08411207 | 0.1532222   | 0.4406794  |
|              | 0.09646298 | 0.3214445  | 1.1080851  | 1.1605630  | 0.7214592  | 1.1020930   | 0.05666695 |
|              | 0.1864177  | 0.1575291  | 0.09653772 | 0.04447811 | 0          | 0.003756221 | 0.2375522  |
|              | 0.1468931  | 0.1130198  | 0.05832027 | 0.1450814  | 0.7435951  | 0.8325117   |            |
|              | 0.06963377 | 0.2223421  | 0.04608672 | 0.2914531  | 0.2963484  | 0.1253536   |            |
|              | 0.1449713  | 0.2006768  | 0.01318467 | 0.4815013  | 0.6035470  | 0.06560092  | 0.20817    |
|              | 0.3272904  | 0.09631477 | 0.4073098  | 1.1186230  | 0.7373296  | 0.03111839  |            |
|              | 0.5449410  | 0.2209765  | 1.0573760  | 3.3350776  | 0.9824540  | 0.2298156   | 0          |
|              | 0.07562599 | 0.3969775  | 0          | 0          | 0.9059395  | 0.0440172   | 0.08762363 |
| TCGA-ZF-A9R9 | 864        | 1          | 0.1119005  | 0.1675301  | 0          | 0.2277135   | 0.6182139  |
|              | 63.314330  | 0.1789261  | 0.2042148  | 0.1540533  | 0.02211497 | 3.455755    |            |
|              | 0.6598956  | 1.8667640  | 0.1209412  | 0.2539116  | 0.3178796  | 0           | 0.8287169  |
|              | 0.08000415 | 0.3305727  | 0.1839709  | 2.2353568  | 2.890270   | 0.02060713  | 0.1202994  |
|              | 0.4121426  | 0.08034172 | 3.9668731  | 0.0038621  | 1.1122070  | 0.1923332   | 0.5218009  |
|              | 0.6974721  | 0.02386089 | 0.4524335  | 0.1363968  | 0.2725805  | 0.08326659  |            |
|              | 0.1266562  | 0.01739856 | 0          | 0.4659296  | 4.98371    | 0           | 0.1264342  |
|              | 0.1945227  |            |            |            |            |             |            |
|              | 1.0818740  | 0.8167091  | 6.1780720  | 0.0595403  | 1.1498180  | 0.3363433   | 0          |
|              | 0.9631758  |            |            |            |            |             |            |
|              | 0          | 0.3271236  | 2.7180420  | 0.3769     | 0.1999054  | 0.1923332   | 0.6554279  |
|              | 0.1611519  | 0.06709298 | 0.3635759  | 0.8674710  | 0.06946369 | 0.1559164   |            |
|              | 0.3556404  | 0.4095893  | 0.6393494  | 3.2971410  | 0.04231331 | 0.4700189   |            |
|              | 0.3456563  | 0.1781434  | 0.1229085  | 0.1012280  | 0.1989654  | 0           | 0.4851207  |
|              | 0          |            |            |            |            |             | 0          |
|              | 0.08682621 | 0.2180028  | 0          | 0          | 0          | 0.03893863  | 0.03498895 |
|              | 0.2329089  | 0.3319724  | 0.7500995  | 0.5378810  | 0.7518082  | 1.0978590   | 0.6838302  |
|              | 0          | 0          | 1.7840793  | 1.1418     | 0.5612296  | 0.2324907   | 0.4121426  |
|              | 0.1443436  |            |            |            |            |             |            |
|              | 0.1012281  | 0.0477580  | 0.04419914 | 0          | 0          | 4.6390540   | 0.22454    |
|              | 0.00792384 | 0          | 0          |            |            |             |            |
|              | 0.4799241  | 1.4645360  | 0.09252181 | 0          | 0.05297993 | 0.1727857   | 0.5196371  |
|              | 0.01806203 | 2.4087720  | 2.1297230  | 0.04722467 | 3.1057370  | 0.01225289  | 0          |
|              | 0.9441813  | 0.5202456  | 0.2431118  | 0.1763054  | 0          | 0.4621599   | 0          |
|              | 0.4927792  | 0          | 0.2933897  | 0.0555779  | 0.3412364  | 0.2706608   | 0.5524465  |
|              | 0          | 0          | 0.3113562  | 0.08242852 | 0.3661729  | 0.07973613  | 0.2869347  |
|              | 0          |            |            |            |            |             | 0          |
|              | 1.2315070  | 0.5053164  | 1.5580480  | 0.3041691  | 0.4509411  | 0.6182139   | 0.1700555  |
|              | 1.6749850  | 0.3005207  | 0.8931045  | 0          | 0.09140259 | 0.1946931   | 0.2914281  |
|              | 0.3276473  | 0.3418490  | 0.1351863  | 0.02067425 | 0.5132342  | 0           | 0.2098447  |
|              | 0.07036581 | 0.2481939  | 0.1081261  | 0.09431    | 0.01725665 | 0.7237803   | 0.2092416  |
|              | 0.4557986  | 0          | 0.4317684  | 0.3952756  | 0.4621599  | 0.6256280   | 0.463193   |
|              | 0.5135854  | 2.0019730  | 0.03703032 | 0.3487361  | 0.1869906  | 0.2902590   | 0.06058221 |
|              | 0.60082    | 0          | 0.02065503 | 0          | 2.0937310  | 0.1047359   | 0.06359716 |
|              | 0.1829106  |            |            |            |            |             |            |
|              | 0.8517259  | 0.05718015 | 0.4829236  | 3.3526940  | 0.1462442  | 0.5731785   |            |
|              | 0.01764035 | 0.1658045  | 3.4140210  | 0.1202083  | 0          | 0           | 0.1356396  |
|              | 0.5810333  |            |            |            |            |             |            |
|              | 0.04572764 | 0.07036581 | 0          | 0.3613091  | 0.1902577  | 0.1658623   | 0.3468304  |
|              | 0.03460739 | 0          | 0.08064798 | 0.2460076  | 0.1463341  | 0.03610351  | 0.1249409  |
|              | 0          | 0          | 0.7153377  | 0          | 0.03703032 | 2.0310390   | 0.07087656 |
|              |            |            |            |            |            |             | 0.07329095 |



|              |            |             |            |            |            |            |
|--------------|------------|-------------|------------|------------|------------|------------|
| 0.1397333    | 0.2553656  | 0.3592639   | 0          | 0.3227286  | 0.2848742  | 0.0458598  |
| 0.9016980    | 0.1348512  | 1.30163     | 13.797820  | 0.0220127  | 0.5711583  | 0.1883382  |
| 0.09886287   | 0.01376192 | 0           | 0.06385308 | 0.9787497  | 0.03117385 |            |
| TCGA-ZF-A9RE | 106        | 1           | 0.1225168  | 0.2246009  | 0.1269483  | 0.5018723  |
| 0.02685974   | 40.751740  | 0.3053006   | 0.2555305  | 0.3614330  | 0.1902456  |            |
| 0.05928239   | 0.2345784  | 0.9083858   | 0.4729115  | 0.03102687 | 0.0828661  |            |
| 0.3612337    | 0.1143705  | 0.08342318  | 0          | 0.07193738 | 2.36120865 | 0.50116    |
| 0.1369847    | 0.1881607  | 0.4834753   | 0.06283138 | 0          | 1.3928690  | 0.4377142  |
| 0            | 1.81779    | 0.2587435   | 0.3732090  | 0.5054663  | 0.4622338  | 0.0322988  |
| 0.008139848  | 0.1030138  | 0.2313118   | 0.1356197  | 0.04048678 | 10.76218   |            |
| 0.3331328    | 0.4284717  | 0.03259859  | 0.4935477  | 0.4562205  | 5.469844   |            |
| 0.2328182    | 7.426130   | 0.1083097   | 0          | 0.4805236  | 1.2566280  | 0.0124794  |
| 0            | 0.2358042  | 0.6644295   | 0          | 0.01010007 | 0.1633711  | 0.5247018  |
| 0.4061931    | 0.1696018  | 0.0232818   | 0.4314612  | 0.2039614  | 0.4868865  |            |
| 2.1818371    | 1.1281090  | 0.1323648   | 0          | 0          | 0.4179522  | 0.01922416 |
| 0.1556012    | 0.3326863  | 0.1896948   | 0.7764116  | 0.3055617  | 0.1400449  | 0          |
| 0.3164459    | 1.5272860  | 0.05258135  | 0.1725615  | 0.08208952 | 0.01071452 |            |
| 0.5192392    | 0.3158705  | 0.2103254   | 0.4296579  | 2.1732870  | 0.01645509 | 0          |
| 0.3237182    | 0          | 1.8555810   | 0.7581182  | 0.2727296  | 0.3294794  | 0.6289262  |
| 0.3562449    | 0.6145508  | 0.3802261   | 0.3604332  | 0.1324825  | 0.9038566  |            |
| 0.2319476    | 0.1756019  | 0.006196853 | 0.1768532  | 0.5663950  | 0.3284098  |            |
| 0.04344404   | 0.5788547  | 0           | 0.2071653  | 0.3513312  | 1.53845    | 0.1977562  |
| 0.6035424    | 0.2820272  | 0.6486314   | 0.1477286  | 0.0883217  | 0.1533183  |            |
| 0.13788      | 0.6153322  | 0.2712393   | 0.1159305  | 0          | 0.5630701  | 0.3011941  |
| 0.4121136    | 0.5241152  | 0.1474360   | 0          | 0          | 0.8466831  | 1.1041070  |
| 0.3166622    | 0.4930807  | 0           | 0.8590984  | 1.3095130  | 0.1346387  | 0.184867   |
| 0.7408477    | 1.2202920  | 0.2775220   | 0.6612362  | 1.5310050  | 0.4347823  | 0.03898586 |
| 1.5981541    | 1.3037810  | 0.06173731  | 0.3145189  | 0          | 0.4318329  | 0.07321061 |
| 0.3564581    | 0.1057227  | 0.01616834  | 0.0891946  | 0.3188659  | 0.2524761  |            |
| 1.2106540    | 0.4146693  | 0.3382405   | 0.9909342  | 0.4363575  | 0.4716947  |            |
| 0.3272756    | 0.04455727 | 0.1136720   | 1.2365040  | 0.1807165  | 0.7277943  | 0          |
| 1.0736690    | 0.4795826  | 0.05798691  | 0.4488742  | 0.4090945  | 0.1462363  |            |
| 0.1134988    | 0.6790907  | 0.4176643   | 0.1866045  | 0.1407645  | 0.04369436 |            |
| 0.2339151    | 0          | 0           | 0.3576138  | 0.1216902  | 0.3130248  | 0.9711547  |
| 3.3000780    | 0.3921274  | 0.6424991   | 0.1793436  | 0.1296677  | 0.1716651  |            |
| 0.2350227    | 0.5630701  | 0.06531157  | 0.02926266 | 0.1734974  | 0.2503297  |            |
| 0.1650891    | 0          | 0.09418746  | 0.7836344  | 1.9456930  | 0.06780983 | 0.2435830  |
| 0.1892127    | 0.2885860  | 0.2059935   | 0.2541133  | 0          | 0.03851795 | 0.5779328  |
| 3.7634450    | 0.06388262 | 0.2027174   | 4.3018550  | 0.2494311  | 0.08337064 | 0.2792677  |
| 0.4901951    | 0.03121811 | 0.06060659  | 0.4983094  | 0.08911453 | 0.07172947 |            |
| 1.3479440    | 0.7271015  | 2.05465     | 0.2926562  | 0.1395860  | 0.2319476  |            |
| 0.01076253   | 0.09980589 | 0.6991098   | 0.2388151  | 0.09751826 |            |            |
| TCGA-DK-A6B1 | 2049       | 0           | 0.1013392  | 0.1685759  | 0.08167033 | 0.135398   |
| 0.01727982   | 57.274570  | 0.3191673   | 0.3082346  | 0.3875376  | 0.08901213 |            |

|                           |                     |                            |                    |                    |                    |            |
|---------------------------|---------------------|----------------------------|--------------------|--------------------|--------------------|------------|
| 0.2221004                 | 0.7847454           | 0.5217827                  | 0.05476332         | 0.01596855         | 0.1599321          | 0          |
| 0.1962095                 | 0.05366908          | 0.2587172                  | 0.04627986         | 2.24676743.7706    | 0.191806           |            |
| 0.08473529                | 0                   | 0.04042165                 | 0                  | 1.1078830          | 0.1126388          | 0.04838349 |
| 0.6682562                 | 0.08097997          | 0.1320542                  | 0.6828871          | 0.1601230.6940171  |                    |            |
| 0.03665656                | 0.08666391          | 0.1050431                  | 0.1744978          | 0.02604657         | 6.082495           |            |
| 0.2857548                 | 0.02120392          | 0.04893426                 | 0.4989547          | 0.6750564          | 6.464925           |            |
| 0.2396481.1280710.1791758 | 0                   | 0.7436018                  | 1.2992670.01906753 | 1.737102           |                    |            |
| 0.03991638                | 0.1137759           | 0.3520184                  | 0.02419174         | 0.006497731        | 0.1291258          |            |
| 0.3375592                 | 0.5487685           | 0.3637027                  | 0.01997067         | 0.09654754         | 0.09542951         |            |
| 0.2885025                 | 0.7603119           | 2.3500550.2341761          | 0.3328189          | 0.01880077         |                    |            |
| 0.07682382                | 0.1484110.05092998  | 1.05109                    | 0.1284173          | 0.1423769          | 0                  |            |
| 0.1310524                 | 0.2507015           | 0.2147966                  | 0                  | 0.2046994          | 0                  | 0.03382744 |
| 0.05877258                | 0.1408295           | 0.04135817                 | 0.1749759          | 0.1451505          | 0                  | 0.5964725  |
| 0.8975790.002646536       | 0.06931932          | 0.06941978                 | 0.08160077         | 0.6341854          |                    |            |
| 0.3080363                 | 0                   | 0.1382385                  | 0.1971179          | 0.15279            | 0.7907244          | 0.1334252  |
| 0.1325025                 | 0.0852307           | 4.2884360.1119151          | 0.6401683          | 0.03189323         |                    |            |
| 0.0379253                 | 0.3312562           | 0.1207301                  | 0.05335734         | 0.5120468          | 0                  | 0.05331069 |
| 0.09562544                | 3.1186130.05452436  | 0.9177531                  | 0.07257523         | 1.4003880          |                    |            |
| 0.2272819                 | 0.08014099          | 0                          | 0.8005268          | 0.2181223          | 0.2147966          | 0.1774061  |
| 0.2507835                 | 0.1550151           | 1.1783430.9421256          | 0                  | 0                  | 0                  | 0.06867333 |
| 0.06808763                | 1.1117910.03212586  | 0.07639498                 | 0.3720437          | 0.08294312         |                    |            |
| 0.1228196                 | 0                   | 0.3175986                  | 0                  | 1.6681471.02253    | 6.2917280.07651701 |            |
| 0.1985184                 | 1.3996650.3389437   | 0.1203887                  | 0.8164713          | 0.3594720.03971779 |                    |            |
| 0.1747491                 | 0.3918172           | 0.5016074                  | 0.1883959          | 0.02866526         | 0.06801512         |            |
| 0.1144183                 | 0.07172754          | 0                          | 0.3248535          | 1.1682840.3292072  | 0.1904018          |            |
| 0.5505707                 | 0.1794320.7376359   | 0.2105479                  | 0.1146610.02437641 | 0.108616           |                    |            |
| 0.1136409                 | 0.3875376           | 0.4918233                  | 0.01493597         | 0.4198961          | 0.636348           |            |
| 0.1367851                 | 0.1863075           | 0.1754566                  | 1.4649440.1703748  | 0.02540018         |                    |            |
| 0.3190791                 | 0.2000821           | 0.1068890                  | 0.3310689          | 0.3688642          | 0                  | 0.1840525  |
| 0.3021627                 | 0.2013799           | 0.6247781                  | 0.5234934          | 0.3573816          | 0.422955           |            |
| 0.1775047                 | 0.1334717           | 0.8365109                  | 0.1209587          | 0.0835945          | 0.1680689          |            |
| 0.05177069                | 0.2444944           | 0                          | 0                  | 0.1096102          | 0.09089118         | 0.9572272  |
| 0.7788561                 | 0                   | 0.1044703                  | 0                  | 0.1014393          | 0.3094293          | 0.09816508 |
| 0.05449335                | 0.4400230.008259985 | 0                          | 1.7013540.08219588 | 0.07452299         |                    |            |
| 0.04257747                | 0.1693827           | 0.06369189                 | 0.4660816          | 0.5372797          | 0.281172           |            |
| 0.05848553                | 0.4288278           | 0.1146610                  | 0.7266647          | 0.1130776          | 1.652787           |            |
| 5.2873150.1476675         | 0.1436810           | 0.3979203                  | 0.1177066          | 0.04280576         |                    |            |
| 0.2891327                 | 0.3781862           | 0.0941054                  |                    |                    |                    |            |
| TCGA-CF-A5U8              | 399                 | 0                          | 0.1113511          | 0.2381537          | 0                  | 0.3237079  |
| 94.459980                 | 0.5433922           | 0.4064244                  | 0.1094978          | 0.09431313         | 0.1616389          |            |
| 0.29848                   | 0.9435422           | 0.07736624                 | 0.05921836         | 0.07531405         | 0                  | 0.03464909 |
| 0.03791018                | 0.2088570           | 2.476728112.97540.06591202 | 0                  | 0                  | 0                  | 0          |
| 1.7262670                 | 0.3182583           | 0                          | 0.6069029          | 0.06991325         | 0.01695982         | 0.1837601  |
| 0.09694795                | 0.1056788           | 0.04438811                 | 0.07382015         | 0.04946613         | 0.1232599          |            |

|              |             |             |             |             |             |             |            |           |
|--------------|-------------|-------------|-------------|-------------|-------------|-------------|------------|-----------|
| 0.07359399   | 21.779530   | 0.1513863   | 0.08986676  | 0.0395036   | 1.6661090   | 0.4975711   |            |           |
| 8.31031      | 0.16928     | 0.24518     | 0.02812538  | 0           | 1.2983890   | 0.1223683   | 0.0141776  |           |
| 1.5664280    | 0.05357852  | 1.1367080   | 0.006884695 | 0.3309030   | 0.09537656  |             |            |           |
| 0.6645139    | 0.05138168  | 0.02116     | 0.3580406   | 0.1179648   | 0.2212569   |             |            |           |
| 0.9088722    | 12.645340   | 0.1503770   | 0.0742399   | 0.0332007   | 0.1627979   | 0           |            |           |
| 0.03597537   | 0.2828408   | 0.1209467   | 0.3735481   | 0           | 0.1542856   | 0.2490297   |            |           |
| 0            | 0.1643465   | 0.1156746   | 0           | 0           | 0.0645791   | 0           | 0.01947609 | 0.6797866 |
| 0            | 0.06371909  | 0.2021013   | 1.8532950   | 0.09793006  | 0           | 0           | 1.475663   |           |
| 0.9428786    | 0.2065619   | 0.1432162   | 0.4103857   | 0.07195074  | 0.5585433   |             |            |           |
| 0.2827424    | 0           | 0           | 3.6168070   | 0.4787948   | 0.04505679  | 0.3214711   |            |           |
| 0.6083719    | 0.08527999  | 0.03589522  | 0.5918630   | 0.1506281   | 0.2742812   |             |            |           |
| 1.9258810    | 0.07702865  | 0.6150277   | 0.1537947   | 1.30893     | 0           | 0           | 0.03483638 |           |
| 0.0626571    | 1.7026160   | 0.4930395   | 0.1770133   | 0           | 0.1574629   | 0.2189957   |            |           |
| 0.8323453    | 2.5218510   | 0           | 0           | 0.09701745  | 0.19238     | 0.4799267   | 0.04538543 |           |
| 0            | 0.6971121   | 0.1757654   | 0.1735120   | 0.1223683   | 0           | 0.8753291   |            |           |
| 1.2038060    | 0.08742851  | 0.3242955   | 0.08012986  | 1.9041250   | 0.2928819   | 0.04251943  |            |           |
| 0.4699283    | 0.9733598   | 0           | 0           | 0.1383838   | 0.6541292   | 0.1330770   | 0.3239721  |           |
| 0.03202919   | 0.2498120   | 0.0405329   | 0.1932039   | 0.2868331   | 0.4501308   |             |            |           |
| 0.6575320    | 0.07685368  | 0.5731248   | 0.1022139   | 1.2597380   | 0.04957485  | 0           |            |           |
| 0.1721875    | 0           | 0.1605449   | 0.1094978   | 0.4446832   | 0           | 0.4745627   |            |           |
| 0.4685661    | 0.08783706  | 0.1710824   | 0.3304990   | 0.0189870   | 0.03438499  | 0.1220049   |            |           |
| 0.3499439    | 0           | 0.08598966  | 0           | 0.3188957   | 0           | 0.04520352  | 0.5200359  |           |
| 0.3764277    | 0.04064244  | 0.9807198   | 0.2054331   | 0.1484961   | 0.5975247   |             |            |           |
| 0.05015354   | 0.1178503   | 0.5112156   | 0.0854415   | 0.3542915   | 0.05935936  |             |            |           |
| 0.07313843   | 0.5406365   | 0.1625112   | 0           | 0.4645515   | 0           | 0.3696318   |            |           |
| 0.4470049    | 0           | 0.04919642  | 0           | 0.2866144   | 0           | 0.1109453   | 0          | 0.4440267 |
| 0.02333839   | 0           | 1.0168940   | 0.08709095  | 0.1974028   | 0.1203016   | 0.05037757  |            |           |
| 0.05209366   | 0.2795659   | 0.5115240   | 0.05674605  | 0.1377079   | 0.4999498   |             |            |           |
| 0.04049651   | 0.1955771   | 0.3346334   | 0           | 2.4671234   | 0.0169210   | 0.1043078   | 0          | 0         |
| 0.07026965   | 0.009781681 | 0           | 0.6353960   | 0.06678477  | 0.1218674   |             |            |           |
| TCGA-XF-AAMW | 253         | 1           | 0.295242581 | 0.052621164 | 0.089227191 | 0.273094572 | 0          |           |
| 25.088752736 | 0           | 0.160938229 | 0.404106158 | 0.338716812 | 0.048624156 |             |            |           |
| 0.990212447  | 0.131901065 | 0.410445078 | 0.132956675 | 0.082868959 | 0.058243458 |             |            |           |
| 0.56549909   | 0.321546835 | 0.058635011 | 0.161517739 | 0.10112415  | 2.01821241  |             |            |           |
| 31.544134171 | 0.067963308 | 0.185151495 | 0.226544361 | 0.176647249 | 0           |             |            |           |
| 0.320398454  | 0           | 0.123061134 | 0.105720702 | 1.355879853 | 0.157285237 | 0.209851619 |            |           |
| 0.142109294  | 0.324886684 | 0.036322573 | 0.160193389 | 0.097467601 | 0.095635503 | 0           |            |           |
| 0.056913265  | 1.59063062  | 0.07804884  | 0.185327127 | 0.015274882 | 0.396452632 |             |            |           |
| 0.38479226   | 3.484609975 | 0.261822376 | 0.821633715 | 0.456760888 | 0           | 0.273844832 |            |           |
| 1.577207577  | 0.07455602  | 0.161517739 | 0.174439158 | 0.165737917 | 0.329648803 | 0           |            |           |
| 0.007098959  | 0.144354391 | 0.073758629 | 0.228398243 | 1.033124854 | 0.032727797 |             |            |           |
| 0.17140658   | 0.156389234 | 0.198123979 | 0.76676553  | 1.208236593 | 0.093034218 |             |            |           |
| 0.019137593  | 0           | 0.139887055 | 0.351310465 | 0.055642475 | 0.072910829 | 0.187066121 |            |           |
| 0.266658586  | 0           | 0.238630859 | 0.085593306 | 0.156447675 | 0.254191851 | 0.357823914 |            |           |

0.24397085 0 0.114152414 0 0.025102771 1.164375949 0.063432421  
0.098553197 0.121855752 0.867481218 0.584066135 0 0 0.237736502  
0.570595377 0.560897614 0.447279892 0.251715957 0.362706501 0.278212373  
0.398718076 0.048590295 0 0.186233977 1.094104987 0.163027251 0.164565243  
0.026133207 0.082868959 0.144762787 0.197851597 1.415722002 0.915424153 0  
0 0.208947086 1.774994942 0.079425911 1.311186007 0.079290526 1.406331197  
0.207665664 0.248311969 0.026940411 0 0.499770591 0.095321944 0.189040941  
0.129214191 0.243545072 0.254037609 0.064368693 0.541736516 0 0  
0.12219906 0 0.148775401 0.202443897 0.140393689 0.055642475 0.367960942  
0.271853233 0.335459919 0.175315737 0.063088303 0 0.728999466 0.714239072  
0 0.111462721 0.371806376 0.226544361 0.12942724 0.131528112 0.528603509  
0.720011534 0.173571302 0.341643512 0.085614311 0.387829931 0.102913958  
0.062635245 0.03715424 0.090912916 0.658260974 0 0.248438272 0.232069833  
0.434082512 0.475473003 0.379903792 0.063236961 0.550860499 0.843442083 0  
0.42611092 0.355998282 0.620779922 0.846792029 0.636199985 0 0.311949053  
0.303372449 0.027171208 0.203546275 0.063897127 0.234934893 0.15954801  
0.144302199 0.275212976 0.087438174 0.068121289 0.061422239 0.131528112 0  
0 0 0.204075058 0.251443831 0.303372449 0.571931666 0.045935262  
0.525102824 0.019392903 0.145821658 0.364538049 0.594678948 0.121772536  
0.091810083 0.462771532 0.32518618 0.201082603 0.154713222 0.31933942  
0.066200819 0.278879549 0.907904154 0 0.380456179 0.126176606 0.132990464  
0.405672461 0.139422629 0.079380732 0 0 0 3.789047285 0.089801368  
0.101773138 0.465171088 0.077918105 0.219742798 0.500673383 0.433864768  
0.043884065 0 0.418472035 0.626352453 0 0.359668367 0.444745729  
0.340701481 2.410356442 0.193597216 0.274707336 0.103524723 0 0.015129155  
0.04676653 0.257388429 0.017215806 0.068541909  
TCGA-BT-A3PJ 789 0 0.064966298 0.046315842 0.039267779 0.230355604 0  
14.607578946 0.113172249 0.070826917 0.158081871 0.074532533 0  
0.146698289 0.261216098 0.923229126 0.03510755 0.069100295 0.025632223  
0.010157924 0.212263158 0.019353406 0.035540976 0.13351045 1.529253164  
21.070640572 0.094714394 0.128044518 0.099699362 0.116610393 0  
0.172337469 1.112067184 0.135394195 0.023263184 1.17046157 0.095176511  
0.10389723 0.093810805 0.230965428 0.05195162 0.276960839 0.096818522  
0.033670399 0.02796667 0.82654512 0.451121936 0.137393304 0.081560169  
0.21511316 0.567040122 0.846711495 1.868707123 0.086418584 0.584108219  
0.354168931 0.057720683 0.257100187 0 0.026055936 0.248786834 0.153537018  
0.255287203 0.072537174 0 0.003124164 0.066416239 0.064920515 0.201030465  
0.27979411 0.024005162 0.092841734 0.080295788 0.277428788 0.815489654  
0.199398724 0.286602433 0.008422217 0.009039565 0.098500092 0.083250126  
0.048975125 0.256697208 0.246976436 0.176029702 0.612823048 0.336059136  
0.033901697 0 0.11186668 0.157473864 0.107368544 0 0.087914857  
0.084640032 0.004418967 0.359464002 0.055831643 0 0.165544848 1.112105966  
0.111977934 0 0 0 1.542544804 0.197475264 0.056240666 0.310175793  
0.119716973 0.048975125 0.721380274 0.064151957 0 0.163918524 1.071730321

|              |             |             |             |             |             |             |             |   |
|--------------|-------------|-------------|-------------|-------------|-------------|-------------|-------------|---|
| 0            | 0           | 0.015334534 | 0.145878402 | 0.127416612 | 0.087072033 | 0.527752957 |             |   |
| 0.40286681   | 0           | 0.051264447 | 0.15047185  | 1.768818274 | 0.034954358 | 3.009642351 |             |   |
| 0            | 1.047384307 | 0.159934393 | 0.054639508 | 0.029640351 | 0.042649172 | 0.346832933 |             |   |
| 0            | 0.14057014  | 0           | 0.401929366 | 0.335396398 | 0           | 0.438677193 | 0.121613479 | 0 |
| 0.026889145  | 0           | 0.425582352 | 0.267279141 | 0.03089276  | 0.097950251 | 0.990439923 |             |   |
| 0.119639235  | 0.118105398 | 0.15430856  | 0.138821897 | 0.057183247 | 1.008302803 |             |             |   |
| 0.556118332  | 0           | 0.171686761 | 0.136356144 | 0.747745216 | 0.07911017  | 0.01929463  |             |   |
| 0.203552864  | 0.48970531  | 0.19096644  | 0.035377193 | 0.037677796 | 0.259729126 |             |             |   |
| 0.090582311  | 0.110259977 | 0.092656347 | 0.080019293 | 0.538000332 | 0           | 0.078096143 |             |   |
| 0.068087369  | 0.327487418 | 0.23540599  | 0.278651575 | 0.072357485 | 0.457917421 |             |             |   |
| 0.506165992  | 0           | 0.023440766 | 0.783352131 | 0.191238278 | 0.223597599 | 0.601586639 |             |   |
| 0            | 0.405798035 | 0.415365845 | 0           | 0.098536009 | 0.028120333 | 0.245555836 |             |   |
| 0.280860398  | 0.063505607 | 0.109006034 | 0.038480456 | 0.112779399 | 0           | 0.159180697 |             |   |
| 0.152016849  | 0           | 0.132740937 | 0.095093895 | 0.276643275 | 0.13351045  | 0.755100087 |             |   |
| 0.080862155  | 0.757979257 | 0.05974203  | 0           | 0.01807647  | 0.116315922 | 0.160771746 |             |   |
| 0            | 0.099567115 | 0.306665149 | 0.066370469 | 0.068087369 | 0.210805974 | 0.087402477 |             |   |
| 0.190233715  | 1.385912322 | 0           | 0.200920852 | 0.111057517 | 0.117054905 | 0.059510472 |             |   |
| 0.061358169  | 0.087336188 | 0.241790579 | 0.071486454 | 0.215869269 | 1.352887656 | 0           |             |   |
| 0.026873457  | 1.39206896  | 0.162881258 | 0.029011824 | 0.24287493  | 0.179706824 |             |             |   |
| 0.212441157  | 0           | 0.236210796 | 1.350684716 | 0.044374861 | 0.853197911 | 0.021747453 |             |   |
| 0.449815482  | 1.911211239 | 0.113599643 | 0.39722738  | 0           | 0.047830847 | 0.03994892  |             |   |
| 0            | 0.09267828  | 0.003788231 | 0.030164444 |             |             |             |             |   |
| TCGA-ZF-A9R7 | 665         | 0           | 0.1376743   | 0.3926036   | 0.1664298   | 0.7216301   |             |   |
| 0.1056397    | 72.312560   | 0.5336673   | 1.1725050   | 0.1579467   | 0.7935860   | 0.4343147   |             |   |
| 1.9682132    | 5944560     | 0.6075893   | 0.0772851   | 0.6518269   | 0.1937368   | 0.04998007  |             |   |
| 0.3144334    | 0.2259516   | 1.1317236   | 1.8073980   | 0.549530    | 0.07394779  | 0.3206834   |             |   |
| 0.8451176    | 0.1647444   | 0           | 5.7437810   | 0.07602109  | 0.3443072   | 0.1478956   |             |   |
| 1.9940480    | 5134048     | 0.2446393   | 2.0542730   | 0.5011075   | 0.0931565   | 0           |             |   |
| 0.07272005   | 0.5886633   | 1.4223840   | 33.493030   | 0.2911591   | 0.3456789   |             |             |   |
| 0.0854738    | 4.3444331   | 2.560254    | 2.811880    | 0.4273155   | 1.1788780   | 0.08113972  |             |   |
| 0.9785572    | 4.9546180   | 0.0588373   | 0.02454081  | 3.4645910   | 0.3091404   |             |             |   |
| 1.1785060    | 0.02979278  | 0.5568684   | 0.5503091   | 0.5857730   | 0.1482325   |             |             |   |
| 0.0508709    | 0.4426806   | 0.7535658   | 0.4871315   | 1.4897912   | 6.762060    | 0.8242713   |             |   |
| 0.0535442    | 0.1819851   | 0.1826457   | 0.1512178   | 0.1037864   | 0.2039939   |             |             |   |
| 0.6978451    | 0.04144844  | 0           | 0.2225515   | 0.2634254   | 1.8967770   | 0.177798    |             |   |
| 0.5839979    | 0.1137658   | 0.06893438  | 0.1863061   | 0.03587324  | 0.00468226  |             |             |   |
| 1.8800970    | 0.05915823  | 0           | 0.3952866   | 0.3869268   | 0.01078635  | 0           | 0           | 0 |
| 11.707252    | 3.539650    | 0.1191832   | 0.2159745   | 2.1141670   | 0.4670387   | 2.685596    |             |   |
| 0.1812648    | 0           | 0.1157901   | 4.3448530   | 0.3801054   | 1.3812890   | 0.08124101  |             |   |
| 0.0772851    | 1.28258     | 0.9841067   | 0.1190884   | 3.6995450   | 0.1251424   | 0.1086378   |             |   |
| 0.6259392    | 0.8562375   | 0.2222222   | 0.2637489   | 0.1478956   | 1.736749    |             |             |   |
| 0.1936728    | 0           | 0.2638137   | 0.3615225   | 1.75682     | 0.9778888   | 0.2857325   |             |   |
| 0.1807613    | 0.3974855   | 0.1579467   | 1.1405972   | 3.038640    | 0.1002682   | 0           | 0           |   |
| 2.0118844    | 4.4054      | 0.3928011   | 0.05189318  | 1.0773850   | 0.8451176   | 0.1251424   | 0           |   |

|              |             |             |             |             |              |               |
|--------------|-------------|-------------|-------------|-------------|--------------|---------------|
| 1.3532580    | 0.9712545   | 1.3379180   | 0.2598804   | 1.0980522   | 2.4297130    | 6.772959      |
| 0.1328876    | 1.0475940   | 0.8546311   | 0.3237515   | 0.2623954   | 0.07984546   |               |
| 1.7613080    | 0.2879383   | 0.8178068   | 0.06930144  | 0.6570996   | 0.5262053    |               |
| 0.4180346    | 0.4964958   | 1.4428840   | 0.3122999   | 0.1662881   | 5.943730     | 4.423196      |
| 6.1078280    | 0.3575497   | 0.1168295   | 0.1490245   | 1.2173720   | 0.5210556    | 0.2369201     |
| 1.7639590    | 0.3652426   | 0.8385611   | 0.1336061   | 0.1013615   | 0.3606788    |               |
| 0.4171414    | 0.3012688   | 0.09919825  | 0.18634     | 0.5732266   | 0.1630929    |               |
| 0.1845429    | 0           | 7.6972610   | 0.6442976   | 0.6520446   | 1.5940330    | 2.435029 0    |
| 3.7488313    | 7.930230    | 0.5783408   | 1.9001150   | 0.2893788   | 0.6459807    | 0.3447632     |
| 1.17084      | 0.1135673   | 0           | 0.00959087  | 0.4007557   | 0.4219499    | 0.2164325     |
| 0.07445544   | 0.7408811   | 0.8973041   | 1.4348320   | 0.1064461   | 0.2353492    |               |
| 0.2480587    | 0.1261125   | 0.2300497   | 0.3701596   | 0           | 0.1009944    | 0.01429571    |
| 2.3335980    | 0.04187519  | 0.2467802   | 0           | 0.3633392   | 0.2937418    | 0.4297944     |
| 1.5233140    | 0.3683437   | 0.03972775  | 0.4666327   | 0.4089034   | 0.5172071    |               |
| 1.5626280    | 3.43164     | 2.9262010   | 0.2858745   | 0.4757945   | 0            | 0.7095302     |
| 0.1128778    | 0           | 3.0769420   | 0.008027887 | 0.1917703   |              |               |
| TCGA-FD-A3SO | 168 1       | 0.159523211 | 0.077541449 | 0           | 0.147556369  | 0 12.98199416 |
| 0.101051559  | 0.158103476 | 0.264658844 | 0.299475614 | 0.014330308 | 1.285791276  |               |
| 0.038873331  | 0.618263817 | 0.054858211 | 0.092549533 | 0.034330538 | 0.006802511  |               |
| 0.189529882  | 0.077762996 | 0.095203667 | 0.178817323 | 1.736879019 | 31.885231581 |               |
| 0.08011945   | 0.685986092 | 0.200298625 | 0.104121479 | 0           | 0.965248612  | 0.192186843   |
| 0.036268064  | 0.311575639 | 0.368860846 | 0.115886121 | 0.015461648 | 0.083763716  |               |
| 0.220959801  | 0.096343534 | 0.276524657 | 0.11654242  | 0.101467067 | 0.299657445  |               |
| 0.167732399  | 1.145916483 | 0.046004457 | 0.081928256 | 0.045017496 | 0.525783891  |               |
| 0.340213106  | 2.312219214 | 0.115744796 | 1.639158796 | 0.743585751 | 0.077308241  |               |
| 0.408912455  | 0           | 0.045238198 | 0.952036674 | 0.05140998  | 0.097691174  | 0.323842396   |
| 0            | 0.046027859 | 0.085087047 | 0.043475671 | 0.40387546  | 0.843170521  | 0.025721066   |
| 0.093260735  | 0.122907686 | 0.201711849 | 0.828585765 | 0.40059725  | 0.137093281  |               |
| 0.045121212  | 0.006053574 | 0.263852345 | 0.095572388 | 0.098392307 | 0.193391776  |               |
| 0.220525385  | 0.209569347 | 0           | 0.112525265 | 0.085767386 | 0.092215211  | 0.112371542   |
| 0.158184555  | 0.07190207  | 0           | 0.050463784 | 0.022672538 | 0.035511283  | 0.317551062   |
| 0.149556307  | 0           | 0.218599765 | 1.511731316 | 0.08521462  | 0.089279271  | 0.044704331   |
| 0.105097064  | 1.153121056 | 0.165305403 | 0           | 0.02967387  | 0.187066855  | 0.065594871   |
| 0.48309061   | 0.11456263  | 0           | 0.073181467 | 1.258595373 | 0            | 0.242499908   |
| 0.015403739  | 0           | 0.469302726 | 0.272113318 | 0.471230883 | 0.29976665   | 0             |
| 0.034330538  | 0.208998831 | 1.443087169 | 0.03511211  | 0.666776459 | 0.046736346  |               |
| 1.298059306  | 0.153005894 | 0.036590733 | 0.142915776 | 0           | 0.634481301  | 0             |
| 0.088372911  | 0.038081467 | 0.251218054 | 0.099825205 | 0.265586615 | 0.702496627  | 0             |
| 0            | 0.072027994 | 0           | 0.745389908 | 0.397756135 | 0.124128725  | 0.065594871   |
| 0.489258582  | 0.053412967 | 0.079092278 | 0.051668322 | 0.185931213 | 0            | 0.306925256   |
| 0.636890046  | 0.026568465 | 0.065699655 | 0.328731669 | 0.333831042 | 0.500113577  |               |
| 0.419937006  | 0.506310413 | 0.462979186 | 0.102308419 | 0.118456176 | 0.22708703   |               |
| 1.0734225    | 0.030330372 | 0.110757588 | 0.124099349 | 0.026793475 | 1.071618639  | 0             |
| 0.156897194  | 0.27357861  | 0.263172313 | 0.140129418 | 0.11196366  | 0.07827512   |               |

|              |             |             |             |             |             |
|--------------|-------------|-------------|-------------|-------------|-------------|
| 0.258553118  | 0.406760285 | 0.036919196 | 0.062790816 | 0.489618861 | 0.292725867 |
| 0.299475614  | 0.334456255 | 0.038473325 | 0.351521234 | 0.307963168 | 0.416404826 |
| 0.059988309  | 0.112988968 | 0.294265881 | 0.062695098 | 0.052342328 | 0.156811931 |
| 0.103077655  | 0.172083616 | 0           | 0.135671956 | 0           | 0.041210405 |
| 0.599672546  | 0.666940286 | 0.625860631 | 0.299657445 | 0.243681276 | 1.200907429 |
| 0.102877115  | 0.04297595  | 0.323818567 | 0           | 0.10766488  | 0           |
| 0.260130394  | 0.059262225 | 0.045596435 | 0           | 0.078041716 | 0.254789671 |
| 0.168557313  | 0.089701165 | 0.037186243 | 0.156777577 | 0           | 0.107466298 |
| 0            | 0.010638382 | 0           | 1.011343877 | 0.052931769 | 0.035992985 |
| 0.241118836  | 0.047491899 | 0.33200183  | 0.376078862 | 0.155199941 | 0.075325979 |
| 0.289558169  | 0.443030352 | 0           | 1.535706732 | 0.116509871 | 1.00410118  |
| 0.123621687  | 0.346973996 | 0.122041497 | 0.064062281 | 0.071340823 | 0.027565673 |
| 0.606851546  | 0           | 0.050500963 |             |             |             |
| TCGA-E7-A97P | 437         | 1           | 0.093443856 | 0.09992714  | 0           |
| 33.485214949 |             |             | 0.054260192 | 0.135831254 | 0.170532031 |
| 2.116231339  | 0.45921149  | 0.057735681 | 0.050496718 | 0.14080245  | 0.073735887 |
| 0.094968797  | 0.203538231 | 0.046394744 | 0.127800336 | 0.256045194 | 0.992455656 |
| 21.092525006 |             | 0.078871064 | 0.334858196 | 0.215102903 | 0.055908603 |
| 0.585899335  | 0.20639157  | 0.038948674 | 0.100381355 | 0.231072176 | 0.143119091 |
| 0.066417738  | 0.089954778 | 0.07118735  | 0.057480213 | 0.057943976 | 0.074036057 |
| 0.048429601  | 0           | 0.07205187  | 2.103228382 | 0.049404694 | 0.175967315 |
| 0.18821504   | 0.121786202 | 2.436889463 | 0           | 0.480084739 | 0.220288259 |
| 0.208011598  | 0.359412445 | 0.059686211 | 0.562321477 | 0           | 0           |
| 0.100381355  | 0.125821374 | 0.120450074 | 0.046689002 | 0.614445607 | 1.106710151 |
| 0.006905534  | 0.050076866 | 0.131991919 | 0.091208665 | 0.202233498 | 0.09560129  |
| 0.235561579  | 0.181710625 | 0.039006002 | 0.070838486 | 0.051318121 | 0           |
| 0            | 0.33758825  | 0           | 0.120842123 | 0.260065531 | 0.297092798 |
| 0.05662538   | 0           | 0           | 0.018064538 | 0.024348289 | 0.025423972 |
| 0.080305084  | 0.062383893 | 0.482928066 | 0.811732467 | 0.117136538 | 0           |
| 0.902919169  | 0.257989463 | 0.142018637 | 0           | 0.082854451 | 0.31568925  |
| 0.252387406  | 0.123030072 | 0           | 0.235771153 | 0.94948474  | 0           |
| 0.104911629  | 0.091634432 | 0.125239497 | 0.8399191   | 0.257538169 | 0           |
| 0.056111538  | 1.511003548 | 0.025138188 | 1.139184127 | 0           | 0.743466777 |
| 1.060970189  | 0.025579805 | 0           | 0.876055458 | 0           | 0.115536088 |
| 0.038540834  | 0.214406777 | 0.203725996 | 0.397784498 | 0           | 0           |
| 0.047492254  | 0.047087203 | 0.04271547  | 0.044434402 | 0.035221528 | 0.243751634 |
| 0.057360774  | 0.084938069 | 0.110974362 | 0.199673581 | 0           | 0.593298752 |
| 0            | 0.035277792 | 0.196126981 | 0.430205805 | 0.182060165 | 0.49954152  |
| 0.290032432  | 0           | 0.012721139 | 0.027096807 | 0.224147829 | 0.065144242 |
| 0.109753132  | 0.057547617 | 0.49604443  | 0.047288861 | 0.14602781  | 0.244832572 |
| 0.28262365   | 0           | 0.04007967  | 0.036025935 | 0.445552328 | 0.339752277 |
| 0.033715875  | 0.300461197 | 0.117885577 | 0.053601694 | 0.397270713 | 0           |
| 0.45874764   | 0.825566281 | 0.051537685 | 0.161786799 | 0.334604515 | 0.201986872 |
| 0.042158253  | 0.121946321 | 0           | 0.094454608 | 0           | 0.10407115  |
|              |             |             |             | 0.291536607 | 0           |
|              |             |             |             |             | 0           |

|                           |                   |                                   |                           |                            |                   |
|---------------------------|-------------------|-----------------------------------|---------------------------|----------------------------|-------------------|
| 0.518615411               | 0.119372422       | 0.096016948                       | 0.362031115               | 0.08723067                 | 0.478639572       |
| 0.036826956               | 0.230761735       | 0.572003834                       | 0.125476693               | 0                          | 0.38081298        |
| 0.213193423               | 0.063642357       | 0.097933029                       | 0.050535236               | 0.251429579                | 0.105917976       |
| 0.990697515               | 0.060338519       | 0.096331071                       | 0.119804148               | 0.056121723                | 0.040732674       |
| 0.025123889               | 0                 | 0.034274027                       | 0                         | 0.181015557                | 0.142110026       |
| 0.086313393               | 0.027819313       | 0.154860994                       | 0.290790171               | 0.027778488                | 0.026964466       |
| 0.120928777               | 0.356831386       | 0                                 | 0.349832933               | 0.062560618                | 0.345060906       |
| 0.066379347               | 0.347777921       | 0                                 | 0                         | 0.086190409                | 0.02960308        |
| 0.162700624               |                   |                                   |                           | 0.325852285                | 0                 |
| TCGA-GU-A767              | 144               | 1                                 | 0.01484273                | 0.01587254                 | 0                 |
| 78.464090.3102751         |                   |                                   | 0.5825410.7042752         | 0                          | 0                 |
| 1.2380580.0561467         |                   |                                   | 0.3867868                 | 0.03513688                 | 0.6544549         |
| 0.1238058                 | 0                 | 0.1830173                         | 1.07331370.235860.1571691 |                            | 0.01595678        |
| 0.6150095                 | 0.05328352        | 5.4496681.6751690.4425769         | 0                         | 0                          | 0.1258415         |
| 0.3380328                 | 0.06329923        | 0.9001769                         | 0.1206131                 | 0.4163382                  | 0.0414175         |
| 0.07391983                | 0.01153892        | 0.1916848                         | 0.1373376                 | 11.621690.1412550.05590171 |                   |
| 0.04607485                | 1.0164740         | 10.290620                         | 0.4194147                 | 0.3936470.07912403         |                   |
| 1.6300131.2940280.2658985 |                   | 3.8001510.1052350.1499786         |                           | 1.8229680.9566815          |                   |
| 0.4582416                 | 0.1741711         | 0.2669809                         | 0.2411276                 | 0.6712025                  | 0                 |
| 0.3695213                 | 0.2607784         | 0.2312856                         | 4.6011820.08418797        | 0.4502648                  |                   |
| 0.9169723                 | 0.0337562         | 0.0815143                         | 0                         | 0.5938023                  | 0                 |
| 0.1151682                 | 0.1652364         | 0                                 | 0                         | 0.2158666                  | 0                 |
| 0.5027775                 | 0.3145254         | 0.8036124                         | 0.7134574                 | 1.4127211.0239080.01744322 |                   |
| 0.8528448                 | 0.04575433        | 2.3664422.7538121.0151280.2698332 |                           | 0.109335                   |                   |
| 0.6290849                 | 0.03356777        | 0.3073529                         | 0.02931336                | 0.2183298                  | 0.03745016        |
| 3.0766720.04917522        |                   | 0.7445870.03678625                | 0                         | 1.83397                    | 0.1193591         |
| 0.2454460.08094997        | 0                 | 0.05729671                        | 1.9446930.02395787        | 0.3101989                  | 0                 |
| 0.5360806                 | 0.06263986        | 3.5577660.3331763                 | 0                         | 2.0525170.05750544         |                   |
| 0.09438113                | 0.03897591        | 0.07346245                        | 0                         | 0.6989776                  | 1.0981040         |
| 0.03685988                | 0.4978858         | 0.1346289                         | 0.7327773                 | 0.08469615                 | 0.06713554        |
| 0.4284769                 | 0.05466751        | 0.08094997                        | 0                         | 0.1522386                  | 0                 |
| 0.5524145                 | 0.1903475         | 0                                 | 0.1495346                 | 0.6833439                  | 0.4120907         |
| 0.1195852                 | 0.3553901         | 0.0523557                         | 0.06061922                | 0.07747359                 | 1.047772          |
| 0.1241710.03778634        |                   | 0.07471421                        | 0.06855698                | 0.09455073                 | 0.04506851        |
| 0.1605823                 | 0.1866696         | 0.6135277                         | 0.07171037                | 0.07639562                 | 0.1106331         |
| 1.6862210.3237999         |                   | 0.1889317                         | 0                         | 0.07158841                 | 0.2247010.1532548 |
| 0.4460427                 | 0.01968849        | 0.3570101                         | 0.2186040.8523704         |                            | 0.03683838        |
| 0.2312856                 | 0.4783407         | 0.5775089                         | 0.03348233                | 0.1272892                  | 0.05274935        |
| 0.08610578                | 0                 | 0.9124992                         | 0.2778481                 | 0.04217834                 | 0.06065416        |
| 0.07584502                | 0.6863150.1533478 |                                   | 0.05542328                | 1.1784290.1286920.1099634  |                   |
| 3.0075980                 | 0                 | 0.05538682                        | 0.4497883                 | 0.2592339                  | 0                 |
| 0.1444874                 | 0.03993737        | 0.1430051                         | 0.3139632                 | 0.1150109                  | 0.06885603        |
| 0.07611932                | 0.1337166         | 0                                 | 0.0776403                 | 0.04788849                 | 0.3314487         |
| 0.3236576                 | 0.6469362         | 0                                 | 0                         | 0                          | 0.1292668         |
|                           |                   |                                   |                           | 0.07953934                 | 0.1269959         |



|              |              |             |             |              |             |              |             |
|--------------|--------------|-------------|-------------|--------------|-------------|--------------|-------------|
|              | 0.1693613    | 0.4500615   | 0           | 0.3951456    | 0.03778634  | 0            | 0.6350614   |
|              | 0.05962321   | 1.2332222   | 6.199060    | 0.03893085   | 0.1657243   | 0            | 0           |
|              | 0.02821313   | 0.3246686   | 0           | 0.1653988    |             |              |             |
| TCGA-4Z-AA81 | 1270         | 1           | 0.16142679  | 0.05754228   | 0           | 0.199089531  | 0           |
|              | 54.972143352 | 0           | 0.078217389 | 0.196399132  | 0.246929006 | 0.070895296  |             |
|              | 0.125077851  | 0.144236414 | 0.531946408 | 0.048463582  | 0.031796084 | 0            | 0           |
|              | 0.039068645  | 0.053432117 | 0           | 0.294883335  | 1.722600356 | 54.481746692 |             |
|              | 0.066061526  | 0.077130213 | 0           | 0.064389083  | 0           | 0.648818562  | 0           |
|              | 0.134569776  | 0           | 0.134569776 | 0            | 0.134569776 | 0            | 0           |
|              | 0.684314465  | 0.035832189 | 0.05736922  | 0.051799771  | 0.109313844 | 0.046339358  |             |
|              | 0.083416489  | 0.079175752 | 0.111551261 | 0.231636499  | 0           | 6.828700321  | 0.11379726  |
|              | 0.168882388  | 0.03340677  | 0.289019177 | 0.140259307  | 3.863730056 | 0.047717988  |             |
|              | 0.276453126  | 0.063425655 | 0           | 0.292800171  | 0           | 0.007992988  | 0.176622831 |
|              | 0            | 0.06041256  | 0.160212205 | 0            | 0.005175234 | 0.062185055  | 0.107542019 |
|              | 0.33301064   | 0           | 0.007952998 | 0.086509142  | 0.06650572  | 0.420174498  | 0.465818454 |
|              | 3.79853776   | 0.033911583 | 0.111612452 | 0            | 0.061187701 | 0.03940153   | 0           |
|              | 0.13288238   | 0.06818683  | 0.226797214 | 0.027436556  | 0.243551044 | 0.205915528  | 0           |
|              | 0.0926546    | 0.065214584 | 0           | 0.053884931  | 0.114425588 | 0            | 0.01830025  |
|              | 0.291394677  | 0           | 0           | 0.065660241  | 1.209818654 | 0.046373374  | 0           |
|              | 0            | 0           | 0           | 0.415971526  | 0.449791903 | 0            | 0           |
|              | 0.022020509  | 0.247891692 | 0.08112819  | 0.242225596  | 0           | 0            | 0.135767016 |
|              | 1.003453532  | 0           | 0.119970225 | 0.031752419  | 0.120825119 | 0.105533973  | 0.144236414 |
|              | 0.113326425  | 0           | 0           | 0.084920493  | 0.0969342   | 1.085765611  | 0.014475633 |
|              | 1.986713992  | 0.346823013 | 0.974535539 | 0.037847749  | 0.090511344 | 1.139114966  | 0           |
|              | 0.82677001   | 0.625418548 | 0.104548043 | 0            | 0.088773779 | 0.185196754  | 0           |
|              | 0.458122323  | 0           | 0           | 0.04454236   | 0           | 0.054229611  | 0.787116058 |
|              | 0.051174422  | 0.040564095 | 0.299440031 | 0.066061526  | 0.195643751 | 0.063903738  | 0.137976605 |
|              | 0.047362547  | 0.227764367 | 0.458384921 | 0            | 0           | 0.135525866  | 0.247730723 |
|              | 0.199192112  | 0.055933338 | 0.144509589 | 0.429461892  | 0.126535759 | 0.073253709  | 0           |
|              | 0.725271904  | 0.075025627 | 0.13698575  | 0.11737236   | 0.033138355 | 0.091405885  |             |
|              | 0.108923716  | 0.038810307 | 0.225575943 | 0.226037039  | 0.216641291 | 0.138477428  |             |
|              | 0.069150864  | 0.364400787 | 0.055898215 | 0            | 0.116490172 | 0.259527425  | 0.045255672 |
|              | 0.061732251  | 0.250701701 | 0           | 0.551815708  | 0.35017396  | 0            | 0.133549118 |
|              | 0            | 0.470994215 | 0.232625192 | 0.064737353  | 0.147131509 | 0.063743578  | 0.089863331 |
|              | 0            | 0.982828645 | 0.083939563 | 0            | 0.219887789 | 0.063447479  | 0.366611713 |
|              | 0.276453126  | 0.694909498 | 0.200924458 | 0.260308663  | 0.028275361 | 0.053152952  | 0.052402005 |
|              | 0.144509589  | 0           | 0           | 0.056227754  | 0.110065892 | 0            | 0.056393986 |
|              | 0            | 0.142314799 | 0.900037944 | 0            | 0.249621798 | 0.045992202  | 0           |
|              | 0.098580185  | 0.031274132 | 0.086804395 | 0            | 0           | 1.459309945  | 0.032733189 |
|              | 0            | 1.55993284  | 0.071004153 | 0.234953234  | 0.141021751 | 0.093027387  | 0.09597618  |
|              | 0            | 0.179063772 | 0           | 0            | 0.581962679 | 0            | 0.198700684 |
|              | 0.742257709  | 0.094089943 | 0.085827967 | 0.075470883  | 0.158465343 | 0.033088058  | 0           |
|              | 0.204697687  | 0           | 0.12491988  | TCGA-2F-A9KQ | 2886        | 0            | 0.1759161   |
|              | 0.2037982    | 0.1063295   | 0.2576393   |              | 0.06749163  | 36.829790    | 0.1278570   |
|              | 0.5083153    | 0.4036392   | 0.04345802  |              | 0.1226741   | 0.1571828    | 0.6521544   |
|              | 0.2455831    | 0.1637214   | 0           | 0.01375284   | 0.3831783   | 0.05240526   | 0.07217855  |
|              | 0.0602534    | 2.063835    | 34.584640   | 0.08098995   |             |              |             |

|              |             |             |            |            |            |             |           |
|--------------|-------------|-------------|------------|------------|------------|-------------|-----------|
| 0            | 0.06749163  | 0.3157583   | 0          | 1.3363340  | 0          | 0.2519687   | 0.4039409 |
| 0.08200166   | 0.1719260   | 0.2540214   | 0.1861338  | 0.05410573 | 0.02727113 |             |           |
| 0.1028752    | 0.2165356   | 0.1893208   | 0.03391096 | 9.2669360  | 0.2790258  |             |           |
| 0.2208491    | 0.01820265  | 0.5314966   | 0.5731826  | 5.1844230  | 0.3120063  |             |           |
| 0.4142421    | 0.1814363   | 0.0781482   | 0.8919773  | 0          | 0.01698532 | 1.2029760   |           |
| 0.0493763    | 0.2946249   | 0           | 0.01268944 | 0.1876615  | 0.2636882  | 0.4763075   |           |
| 0.6155728    | 0           | 0.2749659   | 0.1009475  | 0.3541481  | 0.4568664  | 17.50283    |           |
| 0.02771656   | 0.01140286  | 0.006119347 | 0.4000787  | 0.0161018  | 0.03315378 |             |           |
| 0.2606573    | 0.2229214   | 0.7944237   | 0.0224244  | 0.1421848  | 0.1325989  |             |           |
| 0.1864343    | 0.2271849   | 0.2665054   | 0.1453666  | 0          | 0.1105262  | 0.02291888  |           |
| 0.005982853  | 0.3158238   | 0.03779531  | 0          | 0.4640472  | 1.4382650  | 0.01378248  | 0         |
| 0.09038009   | 0.07082597  | 6.2167990   | 0.5681450  | 0.2665054  | 0.05999256 | 0.5943122   |           |
| 0.1989227    | 0.7919018   | 0.02895184  | 0.04312743 | 0.07397659 | 2.3237330  |             |           |
| 0.1961077    | 0.005190367 | 0.0493763   | 0.3018920  | 0.1964785  | 0.1091637  |             |           |
| 0.4242331    | 0           | 0.06940708  | 0.09054412 | 2.2732440  | 0.0118312  | 0.5974277   |           |
| 0.04724414   | 0.8885874   | 0.03093366  | 0          | 0.1765727  | 0          | 0.91625     | 0.3407774 |
| 0.1514778    | 0           | 0.1451129   | 0.05045491 | 0.1534127  | 1.2265870  | 0           |           |
| 0.07281058   | 0           | 0.7091658   | 1.2062330  | 0          | 0.3773042  | 0           | 0.2798307 |
| 0.5638541    | 0           | 0.62052     | 0.6074365  | 0.05371427 | 0.2324472  | 0.4799937   |           |
| 0.4049498    | 0.4841258   | 0.05224611  | 0.3543310  | 0.4680095  | 0          | 0.1197432   |           |
| 0.3315785    | 0.3114597   | 0.3065991   | 0.4105236  | 0.04427566 | 0.01354229 |             |           |
| 0.2241231    | 0           | 0.1691754   | 0.3687347  | 0.2438624  | 0.03541298 | 0.6413542   |           |
| 0.1808585    | 0.7840869   | 0.1370599   | 0          | 0          | 0.1414110  | 0.2589181   | 0.3531843 |
| 0.5481158    | 0           | 0.4291420   | 0.5975128  | 0.09713748 | 0.4366086  | 0.1142166   |           |
| 0.1224848    | 0.2851933   | 0.06613879  | 0.2678369  | 0.2604940  | 0.0657157  | 0           |           |
| 0.5093996    | 0           | 0           | 0.2610721  | 0.6741866  | 0.4067104  | 0.9087397   |           |
| 0.1642193    | 0.4255101   | 0.06932992  | 0.06516433 | 0.4650019  | 0          | 0.07255644  |           |
| 0            | 0.09191196  | 0.4151948   | 0          | 0.04609184 | 0.04756847 | 0           | 1.105007  |
| 0.6405532    | 0           | 0.1133447   | 0          | 0.3433754  | 0.6445712  | 0.1469753   |           |
| 0.1655426    | 0.2455207   | 0           | 0.01826663 | 0.8945407  | 0          | 0.06064009  | 0         |
| 0.1624924    | 0.06110097  | 0.2983192   | 0.5474376  | 0.0784431  | 0.05076293 |             |           |
| 0.2005566    | 0.4105236   | 0.09011888  | 1.2335510  | 0.05888788 | 0.9744104  |             |           |
| 1.6961740    | 0.1297712   | 0.1636805   | 0          | 0.06475832 | 0.01802899 | 0           | 0.6552708 |
| 0.005128897  | 0.02041986  |             |            |            |            |             |           |
| TCGA-SY-A9G0 | 1008        | 1           | 0.1854217  | 0.1321910  | 0.1494333  | 0.2858534   |           |
| 1.83379366   | 0.125980    | 0.6460146   | 0.4342452  | 0.1503949  | 0.7090829  | 0.1832251   |           |
| 8.3656840    | 0.4970283   | 1.03109     | 0.2672032  | 1.1321920  | 0.0975433  | 0.01932796  |           |
| 2.7823060    | 0.04909952  | 0.2028765   | 0.08467889 | 3.02151861 | 0.558240   | 0.04742568  |           |
| 0.3986777    | 1.1382160   | 15.780890   | 0.9837441  | 1.63818    | 0          | 0.5311676   |           |
| 1.2663862    | 0.5271240   | 0.1317935   | 1.01149    | 0.1778803  | 0.6919557  | 0.1533052   |           |
| 0.1982127    | 0.3043148   | 0           | 0.42892    | 5.8014050  | 0.1960686  | 0.2715797   |           |
| 0.1790714    | 0.4979696   | 0.3759182   | 5.70481    | 0.1096218  | 2.8579131  | 0.019948    |           |
| 0.1098279    | 0.6114959   | 0           | 0.9823763  | 0.9467570  | 0.1387849  | 0.3680531   |           |
| 1.3721831    | 0.5901520   | 0.2362632   | 0.3088184  | 1.0997172  | 0.3956990  | 0.009135152 |           |

|              |            |             |            |            |            |            |           |
|--------------|------------|-------------|------------|------------|------------|------------|-----------|
| 0.3312272    | 1.1389570  | 0.3921371   | 3.0498364  | 0.9955050  | 0.1168569  | 0.9775465  |           |
| 2.1500010    | 0.2108484  | 0.1357748   | 0          | 0.03052687 | 0.2349669  | 0.7815268  | 0         |
| 0.3996473    | 0.3440340  | 0.1064271   | 0.0487150  | 0.4085905  | 0          | 0.09558844 |           |
| 0.4831458    | 1.89184    | 0.4365761   | 2.0184371  | 1.6505214  | 5.8732     | 3.44254    | 0.1888537 |
| 0.1691127    | 0.1905275  | 10.302121   | 4.334081   | 0.802681   | 1.17713    | 0.4215616  |           |
| 0.2847390    | 0.0931873  | 0.8717893   | 0.2034416  | 0.6667145  | 0.05198259 |            |           |
| 1.1082780    | 0.06825752 | 0.4134087   | 0.02188331 | 0          | 0          | 0.2761268  | 1.636442  |
| 0.2555179    | 0.4494495  | 0.04877165  | 0.3181221  | 1.1788190  | 0.08313665 |            |           |
| 0.9041983    | 0.1327919  | 1.3911530   | 14.503140  | 0.1691943  | 0.0811506  |            |           |
| 0.6438395    | 0.1596405  | 0.2074253   | 0.3787028  | 0.3568927  | 0.2836332  |            |           |
| 0.5390077    | 1.2157470  | 0.8102556   | 0.3069795  | 0.6910890  | 0.06229044 |            |           |
| 1.0171290    | 0.05878112 | 0.04659365  | 0.3081215  | 0.07588108 | 0.6741742  |            |           |
| 0.1468051    | 0.1056572  | 0.1632079   | 1.4825131  | 1.8198180  | 0.1887223  | 0.2800085  |           |
| 0.3632318    | 1.1382160  | 0.5720014   | 4.8369131  | 0.0512692  | 0.0280040  | 0.07267218 |           |
| 0.2355985    | 0.1075370  | 0.3106393   | 0.04308882 | 0.05244922 | 0.2281551  |            |           |
| 0.1141924    | 0.5249635  | 0           | 0.6686876  | 0.6477654  | 0.2596358  | 0.2986121  |           |
| 0.2651018    | 0.1270874  | 0.8627590   | 0.06420707 | 0.2097969  | 0.2230093  |            |           |
| 0.5962085    | 0.5718085  | 0.7090829   | 1.0942730  | 0.0546571  | 0.6146318  |            |           |
| 0.9596941    | 2.5937860  | 0.1193113   | 0.1070118  | 0.4426397  | 0.8906774  |            |           |
| 0.1766052    | 0.3533668  | 0.2928744   | 0.1032209  | 0          | 0.2202769  | 0.3856662  |           |
| 0            | 0.08419083 | 2.7065560   | 0.5790205  | 0.3810551  | 1.1706970  | 0.1538603  | 0.3869433 |
| 0.04871743   | 0.3663225  | 8.9512880   | 0.1106599  | 0.2549234  | 0          | 1.489774   |           |
| 0.3209285    | 0.08419083 | 0.1943296   | 0.06685176 | 0.2771747  | 0.6889044  |            |           |
| 0.4135288    | 0.2394608  | 0.3504432   | 0.2641430  | 0.03712099 | 0.1132334  |            |           |
| 0.1436912    | 0.06647148 | 0.4600664   | 0.01511341 | 0.4620878  | 1.077574   |            |           |
| 0.1503949    | 0.1022668  | 0.2337137   | 0.2283635  | 0.09200362 | 0.4954792  |            |           |
| 0.4701630    | 0.07349489 | 0.1426824   | 0.2970937  | 0.3671446  | 0          | 0.565626   |           |
| 0.1241397    | 0.6276492  | 13.363020   | 0.1486041  | 0.1314475  | 0.08668907 | 0.18202    |           |
| 0.2153693    | 0          | 0.1959371   | 0.02162414 | 0.05739532 |            |            |           |
| TCGA-GV-A40G | 580        | 0           | 0.08983605 | 0.1801294  | 0.04072491 | 0.3323875  | 0         |
| 28.020430    | 0.2203654  | 0.7992460   | 0.07729825 | 0.02219295 | 0.06488405 |            |           |
| 0.6923235    | 2.43535    | 0.3944450   | 0.05573901 | 0          | 0.00526743 | 0.2201397  |           |
| 0.1271199    | 0          | 0.1846196   | 4.780839   | 29.698030  | 0.2223078  | 0.1327959  | 0         |
| 0.04031251   | 0          | 3.57465     | 0.4092473  | 0.1404183  | 0.02412642 | 0.3808297  |           |
| 0.1390889    | 0.1795877  | 2.4647280   | 0.1311745  | 0.1740720  | 0.09400522 | 0.08261683 |           |
| 0.1222194    | 3.7995820  | 0.02597625  | 19.004880  | 0.2137375  | 0.06344    | 0.0209152  |           |
| 2.4428010    | 0.4683365  | 2.2380430   | 0.1792507  | 0.2307745  | 0.1687646  | 0.1197251  |           |
| 1.7998240    | 0.02879465 | 0.01901605  | 2.3590280  | 0.0398086  | 0          | 1.27889    | 0         |
| 0.01458042   | 0.4582070  | 0.2693182   | 0.5212255  | 0.2539045  | 0.01493756 |            |           |
| 0.09026894   | 0.2141367  | 0.5179023   | 2.7997266  | 4.796680   | 0.1061563  | 0          | 0         |
| 0.1660022    | 0.02466838 | 0           | 0.6489176  | 0.2134509  | 0.6288238  | 0          |           |
| 0.08713237   | 0.03515971 | 0.1428111   | 0.02900445 | 0.2858053  | 0          | 0.0337361  |           |
| 0.1042025    | 0.03511233 | 0.009165889 | 0.3331430  | 0.1737103  | 0.08996294 |            |           |
| 0.3651389    | 1.5320930  | 0.00263939  | 0.09217621 | 0          | 0.02712681 | 4.836559   |           |

|              |              |             |             |             |             |             |             |  |  |
|--------------|--------------|-------------|-------------|-------------|-------------|-------------|-------------|--|--|
| 4.2240640    | 0.2022024    | 0.4966375   | 0.2285661   | 0.4852858   | 0.2883074   |             |             |  |  |
| 0.06607237   | 0.08500057   | 5.9038350   | 0.0744086   | 2.1030960   | 0.00397589  | 0.2647603   |             |  |  |
| 1.0901940    | 0.6020204    | 0.06588311  | 0.5570883   | 0.0612440   | 0.4253340   | 0.3063312   |             |  |  |
| 1.4154170    | 0.06344      | 0.8566036   | 0.6876031   | 1.56942     | 0.0236956   | 0.1983347   |             |  |  |
| 0.3196984    | 0.1769271    | 1.4124931   | 0.43572     | 0.5682693   | 0.08846356  | 0.3056856   |             |  |  |
| 0.1545965    | 0.5288227    | 1.17695     | 0           | 0.02453535  | 0           | 0           | 0.5432304   |  |  |
| 0.7391926    | 0.09611735   | 0           | 0.5038322   | 0.4135959   | 0.30622     | 0.04000864  |             |  |  |
| 0.3455358    | 0.05930518   | 0.3327286   | 0.8720974   | 0.8434897   | 0.3052417   |             |             |  |  |
| 1.4990091    | 0.96458      | 0.2395736   | 0.05502917  | 0.4222124   | 1.6431320   | 0.1584422   |             |  |  |
| 0.1375873    | 0.1367657    | 2.4550880   | 0.3288026   | 0.1429393   | 0.02826312  |             |             |  |  |
| 0.05186788   | 0.1001474    | 0.0340973   | 0.1862864   | 1.2357440   | 0.5434235   |             |             |  |  |
| 0.2441413    | 0.5201850    | 0.4040751   | 0.28505     | 0.2449760   | 0.08576359  | 0.1701742   | 0           |  |  |
| 1.0766740    | 0.1159474    | 0.6474538   | 0           | 0.7453971   | 0.6269374   | 0.04960573  |             |  |  |
| 0.1579338    | 0.2041467    | 0.6165642   | 0.1213677   | 0.1266580   | 0.5778161   |             |             |  |  |
| 0.1596335    | 0.1362117    | 0.02803423  | 2.9415590   | 0.2627630   | 0.5506665   |             |             |  |  |
| 0.1808081    | 0.2295271    | 2.1808191   | 0.3632090   | 0.2306226   | 0.7765194   | 0.2478356   |             |  |  |
| 0.3161394    | 0.05858514   | 0           | 0.4168440   | 0.1431584   | 0.4611649   | 0.06883332  |             |  |  |
| 0.03530696   | 0.03643808   | 0.09064577  | 1.02465     | 1.4477430   | 0.06945885  | 0           |             |  |  |
| 0.2225640    | 0.06171876   | 0.10769     | 0.2536157   | 0.3134536   | 0.008237683 | 0.2798496   |             |  |  |
| 4.07875      | 0.06148046   | 0.2322555   | 0           | 0.5512302   | 0.0501473   | 0.2207261   |             |  |  |
| 0.7571497    | 0.1201769    | 0.03888508  | 1.0712510   | 0.05717573  | 0.2531183   |             |             |  |  |
| 0.5845668    | 0.09021779   | 3.1722489   | 0.42698     | 0.1767226   | 0.05373489  | 0           |             |  |  |
| 0.6944803    | 0.04833655   | 0.02134509  | 1.4737990   | 0.1178641   | 0.08603038  |             |             |  |  |
| TCGA-FD-A43Y | 474          | 1           | 0.018286831 | 0.078222404 | 0.198956985 | 0.202980251 |             |  |  |
| 0.140317787  | 26.994314604 | 0.06371186  | 0.106327943 | 0.233610154 | 0           |             |             |  |  |
| 0.072280772  | 0.553810666  | 0.392147101 | 1.254165883 | 0.474342568 | 0.051867938 |             |             |  |  |
| 0.216450142  | 0.360268123  | 0           | 0.065371581 | 0           | 0.075161528 | 2.487696842 |             |  |  |
| 57.388962423 | 0.084190672  | 1.730025762 | 0.673525378 | 0.13129482  | 0           |             |             |  |  |
| 0.71441799   | 0.302929054  | 0           | 0           | 0.503885578 | 0.058451907 | 0.116980724 |             |  |  |
| 0.105624143  | 0.157887665  | 0.11473773  | 0.26364465  | 0.089002336 | 0.042649222 |             |             |  |  |
| 0.23616327   | 0.338410793  | 2.548409852 | 0.2320423   | 0.10330967  | 0.102178872 |             |             |  |  |
| 0.884002058  | 0.762668443  | 6.630015438 | 0.145951559 | 0.234879774 | 0.129330309 | 0           |             |  |  |
| 0.705598015  | 0            | 0.068453208 | 0.900372467 | 0.064826818 | 0.061593176 | 0.449193697 |             |  |  |
| 0            | 0.007914557  | 0.317001553 | 0.109643666 | 0.127319445 | 0           | 0.04865052  |             |  |  |
| 0.058799835  | 0.106551363  | 0.187418781 | 0.284953044 | 1.178669411 | 0.276594422 |             |             |  |  |
| 0.071121029  | 0.022900259  | 0.083177954 | 0.200857684 | 0.124070464 | 0.108383394 |             |             |  |  |
| 0.208558126  | 0.09909832   | 0.727291158 | 0.070945902 | 0.050894459 | 0.348843862 | 0           |             |  |  |
| 0.132978087  | 0            | 0.054937981 | 0.042422457 | 0.085768667 | 0.018657884 | 0.303547739 |             |  |  |
| 0.612908094  | 0            | 0.181140994 | 2.971521154 | 0.330957398 | 0           | 0           | 0.044175003 |  |  |
| 0.908787163  | 0.875474707  | 0.332445219 | 0.12722146  | 0.286434282 | 0.082713643 |             |             |  |  |
| 0.971373267  | 0.036115219  | 0.053798189 | 0.092280167 | 1.901848974 | 0.181757433 |             |             |  |  |
| 0.061157375  | 0.038847531  | 0.061593176 | 0.376587322 | 0.147055163 | 2.372719295 |             |             |  |  |
| 0.151199575  | 0            | 0           | 0.2682489   | 1.379939276 | 0.162343766 | 1.834450845 | 0           |  |  |
| 2.222633747  | 0.463048697  | 0.046140084 | 0.090106774 | 0.072029797 | 1.228673568 |             |             |  |  |

0.283395924 0.101746126 0.09603973 0.362034584 0.062938658 0.09568534  
1.578392081 0 0 0.045412832 0.055765004 0.110578793 1.203747484  
0.052174501 0.082713643 0.413416055 0.134705076 0.199467131 0.195457742  
2.063204322 0.048288132 1.470697952 0.367522116 0 0 0.322406908  
1.010288067 0.064132054 0.676170388 0.392889804 0 0 0.119496438 0  
0.626648793 0.267721371 0.931085352 0.138076289 0.016892982 0.629047287 0  
0.065947932 0.919937101 0.129054454 0.265050021 1.270652687 0.084602698  
0.454925036 0.398934262 0.046554268 0.197944481 0.088199752 0.36912067  
0.503509263 0.37062153 0 0.269365869 0.162849977 0.141366892 0.121030231  
0.617398263 0.349235381 0.079057095 0.057752176 0.320469148 0 0.072331177  
0 0.537677658 0 0.10393077 0.44836992 0.289978023 0.140166092  
0.789196041 0.897420426 0.307276555 2.497842461 0.115311738 0.027095849  
0.022896889 0.049111225 0.135762969 0 0.156692676 0.500659843 0.03736416  
0.057496069 0.059338048 0 0.54929198 0.474342568 0 0.113111132 0  
0.131795309 1.00506694 0.119569906 0.059000517 0.510447383 1.462208613  
0.47851078 0.478230622 0 0.075643895 2.696795613 0.130305161 0.043553604  
0.164921454 0.58804136 0.619728068 0.126645798 0.31779509 0 0.074944298  
0.423811229 0.146916301 1.519378538 3.768372483 0.095928701 0.291684219  
0.076945778 0.242343243 0.044979579 0 0.608702513 0.076774914 0.216513929  
TCGA-S5-AA26 503 0 0.3806125 0.5426933 0.2300548 0.6454440.03245001  
54.018970 0.2151580.6174271 0 0.1462625 0.1516674 0.7935223  
3.0571721.0169810.1386924 0.2002257 0.3173939 0 0.1385806  
0.1735174 0 5.361248146.92150.07788001 0.1136611 0.09735002  
0.2277251 0.4015688 3.1207630.07005562 0.2644075 0 1.658297  
0.5407054 0.3156191.4656040.2362621 0.2497350.06883786 0.06222693  
0.2137004 0.8192297 0.04891322 27.887670.6037008 0.2787339  
0.07876656 2.4702570.5511729 9.1009460.2250192 1.2493250.1869315  
0.5636054 2.6045590.2168811 0.03957636 3.7479760 0.3561022  
1.7943060.04543001 0.01220218 0.6541511 0.9508606 0.6379533  
0.1366005 0.0281274 0.5099287 0.2240105 0.5263032 1.592546  
5.2569010.1599136 0.08223754 0.1059187 0.6251635 0 0.1434632  
0.4699656 0.4823132 0.4201552 0 0.2871226 0.2059731 0  
0.1638459 0.1537631 0.4193539 0.12705 0.2452663 0 0.008629675  
1.1351280.1090320 0.3779281.4262570.0298198 0 0 0 6.305006  
1.4461640.05491539 0.3807467 1.1884420.6216738 1.5610620.08352035  
0.1244141 0.2134079 6.1878570.1401112 0.9900313 0.02994637  
0.2848818 2.1772471.4170040.04771452 2.4476580 0.3503951 0.3754778  
1.7534390.1023921 0.3756262 0.13629 0.5976838 0.08923752 0.1067039  
0.3357260.08328835 2.16412 0.5734608 0.4649955 0.05552557 0.5756053  
0.7277623 0.4978861 2.7004050.05937387 0 0 0.0644813 0.5114508  
1.91386 0.1206592 0.04782106 0.2868208 0 0.2306447 0 0.5964229  
0 0.7160312 1.8100460.1162163 0.1436924 1.3846873.9913510.7539209  
0.6782388 1.3061131.1813510.07458658 0.1381742 0.07357989 1.333258  
0.3537912 0.2691544 0.1064388 0.1367340.05387926 0.2568206

|              |            |            |             |            |             |
|--------------|------------|------------|-------------|------------|-------------|
| 0.3660281    | 0.5983465  | 0.3837245  | 0.5107974   | 0.3265024  | 0.3369578   |
| 1.3852170    | 0.06589847 | 0.3768162  | 0.0457768   | 0          | 0.9603354   |
| 0.6945485    | 0.02804846 | 0.9107507  | 0.8763383   | 0.1634631  | 0.262402    |
| 0.05491539   | 0.07571668 | 0.04570702 | 0.1717176   | 0.6386243  | 0.1502948   |
| 0.1616979    | 0          | 0.9608383  | 0.2968694   | 0.4206145  | 0.3456346   |
| 0            | 2.3465593  | 0.60461    | 0.2960876   | 1.5885460  | 0.2166701   |
| 0.3407251    | 0.3662943  | 0          | 0.004419131 | 0.5888963  | 0.3024303   |
| 0.1372257    | 0          | 1.9773491  | 1.5768920   | 0.2942794  | 0.05422026  |
| 0.1162163    | 0.2027801  | 0.1705563  | 0.2360930   | 0.01551154 | 1.0275652   |
| 0.2701244    | 0.1749347  | 0.3198273  | 0.1841551   | 0.1007224  | 0.4743035   |
| 1.0308990    | 0.2640083  | 0.03661026 | 0.7583909   | 0.05383089 | 0.4766212   |
| 0.7765481    | 0          | 2.6352959  | 4.826690    | 0.2773069  | 0.1686378   |
| 0.08038554   | 2.0713160  | 0.03698964 | 0.02945364  |            |             |
| TCGA-BT-A42E | 1108       | 0          | 0.01181285  | 0.1263245  | 0.08568096  |
| 0.05438516   | 34.3302    | 0.04115633 | 0.2575699   | 2.6085280  | 0.07003747  |
| 0.1647526    | 0.2533176  | 1.6422180  | 0.1723578   | 0.5088639  | 0.05592864  |
| 0.07719183   | 0.04222847 | 0.0387746  | 0.04855254  | 2.14354647 | 0.054920    |
| 0.5968760    | 0.2175406  | 0.12722    | 0           | 0.6495141  | 0.07827396  |
| 1.3771070    | 0.1368747  | 0.1385390  | 0.1705767   | 0.2939759  | 0.07411782  |
| 0.04813399   | 0.1102015  | 0.1830670  | 0.08197697  | 1.9856370  | 0.03747344  |
| 0.0146678    | 0.9041532  | 1.4472054  | 0.64349     | 0.2199895  | 0.5765615   |
| 0.1259446    | 0.4470340  | 0.04211346 | 1.5122090   | 0          | 0.3429262   |
| 0.003408409  | 0.2488809  | 0.2124815  | 0.1644906   | 0.03815633 | 0.1414218   |
| 0.1329415    | 0.03754343 | 0.3113178  | 0.4295033   | 0.6526219  | 0.06700251  |
| 0.01837699   | 0.1923092  | 1.2358120  | 0.0518997   | 0.2671551  | 0.07001307  |
| 0.2694471    | 0.1066919  | 0          | 0.3895495   | 0.0493149  | 0.07511492  |
| 0.2147516    | 0          | 0.07097724 | 0.08906264  | 0.03693633 | 0.009642036 |
| 0            | 0          | 0.3459507  | 0.9416569   | 0.11106    | 0           |
| 0.8348384    | 0.1533940  | 0.09185048 | 0.5333208   | 0.1335776  | 0.4147775   |
| 0.1399774    | 0.03475234 | 0.2980539  | 1.7030230   | 0.03913698 | 0.3160496   |
| 0.04600672   | 0.1193631  | 0.5212851  | 0.09499411  | 0.1705984  | 0.8302060   |
| 0.05592864   | 0.2097629  | 0.5779456  | 0.1144038   | 1.62939    | 0.07613922  |
| 2.5561870    | 0.4486775  | 0.1192216  | 0.07114166  | 0          | 1.2736010   |
| 0.03101968   | 0.2923321  | 0.1626275  | 0.1854313   | 0.6970758  | 0           |
| 0.0880068    | 0          | 0.2500094  | 0.7451923   | 0.1685174  | 0.1068621   |
| 0.08701625   | 0.1288510  | 0.08417401 | 0.6058093   | 0.09357893 | 1.9500730   |
| 0            | 0.2140655  | 0.2082671  | 1.9578660   | 0.3210652  | 0.1157756   |
| 0.4085519    | 0.08333646 | 0.0482449  | 0.06165875  | 0.4857601  | 0.1235297   |
| 0.2405835    | 0.1248716  | 0          | 0.8578489   | 0.03586858 | 0.07668141  |
| 0.1012302    | 0.3138959  | 1.1248150  | 0.1032303   | 0.7640637  | 0.4417748   |
| 0.3836022    | 0.7406740  | 0.2980539  | 0.1219706   | 0.3880136  | 0.03133887  |
| 0.3590207    | 1.2623660  | 0.02609132 | 0.1856837   | 0.2454304  | 0.6908929   |
| 0.07660348   | 0.1172491  | 0.2334429  | 0.04198152  | 0.07320126 | 0           |
| 0.0552826    | 0.3356839  | 0.2413635  | 0.1095095   | 0.1509066  | 0.3641441   |

|                            |                     |                            |                   |                           |                    |
|----------------------------|---------------------|----------------------------|-------------------|---------------------------|--------------------|
| 3.3562280.1654111          | 2.1480340.09311077  | 0.07001307                 | 0.00246514        | 1.078639                  |                    |
| 0.08769962                 | 0                   | 0.2814402                  | 0.6356763         | 0.1930908                 | 0.1857054          |
| 0.1907092                  | 0.95737             | 0.7824498                  | 0                 | 0.2557348                 | 0.06058093         |
| 0.2596997                  | 0.1132843           | 0.05716938                 | 0.06594735        | 0                         | 0                  |
| 0.09772828                 | 0.4913517           | 0.2712274                  | 0.1582570.1748272 | 1.4214140.06320992        |                    |
| 0                          | 0.2882768           | 0.09021882                 | 0.2420611         | 2.4471                    | 0                  |
| 0.1665380.4710525          | 0.04970513          | 0.1565479                  | 0.05084753        | 0                         | 0.2583933          |
| 0.008265792                | 0.0329089           |                            |                   |                           |                    |
| TCGA-FD-A43X               | 110                 | 0                          | 0.2531786         | 0.1547112                 | 0.08744544         |
| 81.400280                  | 0.1401995           | 0.8800815                  | 0                 | 0.04765319                | 0.04323739         |
| 1.0950110.1498470.03419544 | 0.1427010.005655171 | 0.07878149                 | 0.1221113         |                           |                    |
| 0.1582924                  | 0.09910483          | 2.86061595.449940.02775257 | 0.05184407        | 0                         |                    |
| 0.2163998                  | 0.07631957          | 2.7213380.03994295         | 0.1206038         | 0.0259024                 |                    |
| 0.6388484                  | 0.1252424           | 0.2956379                  | 0.5570862         | 0.2632916                 | 0.1067918          |
| 0.01682084                 | 0.0818754           | 0.1124709                  | 0.6539294         | 0                         | 23.400340.1529806  |
| 0.06810989                 | 0                   | 2.8168860.1885542          | 7.5764510.2245198 | 0.7432862                 |                    |
| 0.04263238                 | 0.1285382           | 2.3885510.1854855          | 0.02793747        | 2.1765210                 |                    |
| 0.08121417                 | 1.0499650           | 0.0104358                  | 0.2379299         | 0.2168573                 | 0.5036342          |
| 0.1168263                  | 0.01603713          | 0.3488894                  | 0.1660385         | 0.1235613                 | 1.534219           |
| 4.0333730.2279411          | 0.009377719         | 0                          | 0.3427342         | 0.01324212                | 0.02726568         |
| 0.3215470.1374980.1960003  | 0                   | 0.1637060.08388411         | 0                 | 0.09341848                |                    |
| 0.3068438                  | 0                   | 0.1086584                  | 0.1538253         | 0                         | 0.00246015         |
| 0.09658521                 | 0.1817298           | 1.5894270                  | 0                 | 0.03716431                | 0.1164946          |
| 2.2537580.09393177         | 0.04440411          | 0.5887368                  | 0.2726568         | 0.8466384                 | 0.14286            |
| 0                          | 0.1825151           | 3.8912560.1198288          | 0.9676745         | 0.01707424                | 0.2436425          |
| 0.3901482                  | 0.2262175           | 0.01632296                 | 0.3987308         | 0                         | 0.08562061         |
| 1.4196330.04864992         | 0.6047074           | 0.0388536                  | 0.7799978         | 0.1017594                 | 0                  |
| 0.1518141                  | 0                   | 1.3751820.2335462          | 0.3290069         | 0                         | 0.5370340.04149413 |
| 0.4415833                  | 3.1748940           | 0                          | 0                 | 0.07352939                | 0.2551579          |
| 0.08386354                 | 0.2220206           | 0.09862836                 | 0.04295373        | 0.06182851                | 0                  |
| 0.9841551                  | 0                   | 0.08192771                 | 0.3340167         | 1.4986390.5038475         | 0.1503853          |
| 0.32378                    | 1.1225990.04252632  | 0.1772583                  | 0.04195235        | 1.8839020.1260736         |                    |
| 0.03069225                 | 0.03641232          | 0.0890975                  | 0.03071982        | 0.1830362                 | 0.1391299          |
| 0.4548714                  | 0.5712708           | 0.1164946                  | 0.1551323         | 0.1983174                 | 2.494355           |
| 0.03757271                 | 0.1227690.02610013  | 0                          | 0.5779645         | 0.2489648                 | 0.3117479          |
| 0.7170928                  | 0.6070171           | 0.0798859                  | 0.08976677        | 0.09393177                | 0.04317066         |
| 0.2606034                  | 0.1794955           | 0.1618304                  | 0.1713843         | 0.09696239                | 0                  |
| 0                          | 0.03425968          | 0.2956009                  | 0.125             | 0.1232114                 | 2.2670230.1556975  |
| 0.06752699                 | 0.6895870.2565763   | 0.2500921                  | 0.2364952         | 0                         | 0.1491761          |
| 0.0352746                  | 0.2788560.2217006   | 0.03790595                 | 0.1564813         | 0                         | 0.4646281          |
| 0.5547129                  | 0                   | 0.1305006                  | 0                 | 0.1520573                 | 0.06626195         |
| 0.0777956                  | 0.06730544          | 0.008844068                | 0                 | 2.8375860.06600611        | 0.08976677         |
| 0.1813602                  | 0.05024946          | 0.3707946                  | 0.9879671         | 0                         | 0.08349491         |
| 0.03069225                 | 0.2964552           | 0.3352918                  | 0.02421471        | 2.8047445.2131850.3162189 |                    |

|              |              |             |             |             |              |             |           |
|--------------|--------------|-------------|-------------|-------------|--------------|-------------|-----------|
| 0.03846025   | 0            | 0.5858299   | 0.03706761  | 0.02291633  | 1.5134920    | 0.004218007 | 0.2099163 |
| TCGA-ZF-AA4R | 1036         | 1           | 0.118628454 | 0.190288629 | 0.071702962  | 0.292611694 |           |
| 0.091025513  | 15.236607611 |             | 0.068884172 | 0.273029883 | 0.469068409  | 0.136096398 |           |
| 0.019537183  | 1.331476745  | 0.264989206 | 0.916204509 | 0.117528368 | 0.252354266  |             |           |
| 0.046804437  | 0.009274184  | 0.602921677 | 0.10601795  | 0.097346729 | 0.162526713  |             |           |
| 1.858632178  | 17.35736952  | 0.081922962 | 0.255064667 | 0.273076539 | 0.212930567  |             |           |
| 0.12516008   | 1.401792899  | 0.982565116 | 0.148337873 | 0           | 0.335256897  | 0.323885651 |           |
| 0.147557147  | 0.570995071  | 0.261078907 | 0.138646877 | 0.119536292 | 0.05370854   |             |           |
| 0.061482145  | 1.429879824  | 0.091470988 | 3.15296883  | 0.188160121 | 0.14892886   |             |           |
| 0.135023834  | 0.318589295  | 0.669974547 | 1.894767913 | 0.210400435 | 0.660264771  |             |           |
| 0.227223288  | 0.421591849  | 0.32275713  | 0.050697754 | 0.084583355 | 2.271423678  | 0           |           |
| 0.199780461  | 0.309056702  | 0           | 0.037080695 | 0.13709466  | 0.118544854  | 0.091770403 |           |
| 0            | 0.008766685  | 0.116551186 | 0.115201508 | 0.260529398 | 0.616172703  | 1.395724531 |           |
| 0.074762288  | 0.046136903  | 0.041265614 | 0.292274381 | 0.065149166 | 0            | 0.55661578  |           |
| 0.826794739  | 0.178572344  | 0           | 0.268469228 | 0.061904495 | 0.377164009  | 0.051067137 |           |
| 0.287547261  | 0            | 0           | 0.194932346 | 0.092731614 | 0.004034517  | 0.188535035 |           |
| 0.050974287  | 0.079197339  | 0.676947824 | 1.272979497 | 0.413590479 | 0.324583016  |             |           |
| 0.060947517  | 0.191045029  | 1.113573798 | 0.81132708  | 0.051347725 | 0.186096604  |             |           |
| 0.491857157  | 0.313000009  | 1.851256654 | 0.078094312 | 0           | 0.199543473  | 5.417146053 |           |
| 0            | 1.256323824  | 0.028000857 | 0.066593487 | 0.523491124 | 0.370984888  | 0.874447512 |           |
| 0.817371953  | 0            | 0           | 0.22387981  | 1.62312862  | 0.191479963  | 1.012348593 |           |
| 0.509742872  | 0.788605529  | 0.12516008  | 0.798173893 | 0.357213634 | 0            | 1.652802646 |           |
| 0.306402819  | 0.20953556   | 0.103836511 | 0.048928199 | 0.068048199 | 0.879353479  |             |           |
| 0.835851666  | 0            | 0.172794194 | 0.049099576 | 0.060292168 | 0.47822359   | 0.650735582 |           |
| 0.056410177  | 0.044714287  | 0.563880391 | 0.655383693 | 0.37740578  | 0.281767417  |             |           |
| 0.202791016  | 0.052208302  | 0.334756513 | 0.63283039  | 0.253554271 | 0.447857156  |             |           |
| 0.547769872  | 1.001280642  | 0.369805216 | 0.440399905 | 0.318589295 | 0.157800326  |             |           |
| 0.278963761  | 0.080748439  | 0.034399826 | 0.325210532 | 0.165403292 | 0            | 0.129380956 |           |
| 0.200908428  | 0.176326151  | 0.060033957 | 0.099822485 | 0.12432753  | 0.199330665  |             |           |
| 0.095522514  | 0.2035271    | 0.167696812 | 1.082085746 | 0.739407243 | 0.15100103   | 0           |           |
| 0            | 0.149657605  | 0.136096398 | 0.649425986 | 0           | 0.497677952  | 0.379228997 |           |
| 1.637608527  | 0.114498837  | 0.462129527 | 0.330388899 | 0.299163119 | 0.178401896  |             |           |
| 0.626623173  | 0.351326541  | 0.135552265 | 0           | 0.36993592  | 0.092527584  | 0.056184084 |           |
| 0.16158996   | 0.819973481  | 0.202060238 | 0.365685104 | 1.48094696  | 0.129197502  |             |           |
| 0.928339668  | 0.093504807  | 0.146477837 | 0.226927474 | 0           | 0.146784597  | 0           |           |
| 0.549560665  | 0.559970532  | 0.12119247  | 0           | 0.128310563 | 0.159596914  | 0.437009777 |           |
| 1.074545079  | 0.15320141   | 0.214014183 | 0           | 0.106871123 | 0            | 0.198224634 |           |
| 0.15947587   | 0            | 0           | 0           | 0.86175793  | 0.072164371  | 0.032713953 | 0         |
| 0.047089411  | 0.274323464  | 0.799852568 | 0.141060921 | 0.034231817 | 0.372836703  |             |           |
| 0.956339859  | 0.081028491  | 0.909385386 | 0.119132541 | 1.478453448 | 12.055919868 |             |           |
| 0.162056983  | 0.220754787  | 0           | 0.174678243 | 0.060788937 | 0            | 0.300854277 | 0         |
| 0.137700678  |              |             |             |             |              |             |           |
| TCGA-BT-A20T | 453          | 1           | 0.0746363   | 0.1064196   | 0.09022529   | 0.06903736  |           |



|                                   |                   |                                    |                           |                   |            |                   |
|-----------------------------------|-------------------|------------------------------------|---------------------------|-------------------|------------|-------------------|
| 0.0763595                         | 77.964110         | 0.1084923                          | 0.1362088                 | 0                 | 0          | 1.3879250.3334413 |
| 0.7378424                         | 0.02688879        | 0.1014372                          | 0.05889497                | 0.1867183         | 0.1625718  |                   |
| 0.02964545                        | 0.08166224        | 0.1022553                          | 2.25442552.144730.1030853 | 0.1872226         |            |                   |
| 0.2290785                         | 0.1786232         | 0.7874574                          | 0.7559591                 | 0                 | 0.3110943  | 0.05345165        |
| 0.2109303                         | 0.08946261        | 0.02652488                         | 0.8621936                 | 0.2274375         | 0.06427554 |                   |
| 0.1272742                         | 0.09011006        | 0.1160463                          | 0.06425882                | 0.0575499         | 1.9301080  |                   |
| 0.2811003                         | 0                 | 0.7015529                          | 0.1945483                 | 6.1293570         | 0.8308246  | 0.2199382         |
| 3.0503610.2584475                 | 0.1275880.1042156 | 0.6532980                          | 0.08379594                | 0.2222242         |            |                   |
| 0                                 | 0.05742694        | 0.1127943                          | 0.0745837                 | 0.1154766         | 0.4821607  | 0.0110313         |
| 0.2666522                         | 0.1054257         | 0.1457020.5815072.4435040.09407491 | 0.1935167                 |                   |            |                   |
| 0.1973164                         | 0.1980326         | 0.02732617                         | 0.2813245                 | 0.2211792         | 0.1891587  |                   |
| 0.1348207                         | 0.03805619        | 0                                  | 0.08655076                | 0.1581977         | 0          | 0.09045664        |
| 0.1494834                         | 0.07214333        | 0.07779072                         | 0.08630415                | 0.1669449         | 0          | 0                 |
| 1.2750471.2204310.1344930.1021074 | 0                 | 0.9615834                          | 0.4945527                 | 0.1701516         |            |                   |
| 0                                 | 0.1119939         | 0.09169094                         | 0.0562649                 | 0.7167612         | 0.09826766 | 0                 |
| 1.7844250.08242544                | 0.4992183         | 0.01761702                         | 0.1675919                 | 0.2927642         |            |                   |
| 0.06668826                        | 0.8084094         | 0.2057031                          | 0                         | 0.05889497        | 0.1600639  | 1.34098           |
| 0.08031438                        | 0.8839020         | 0.5078795                          | 0                         | 1.9459440.2996594 | 0.2939841  |                   |
| 1.2439660.4819411                 | 0.1252399         | 0                                  | 0.1231347                 | 0.4281322         | 0.2603549  |                   |
| 0.5916201                         | 0.1397152         | 0.2174304                          | 0                         | 0.3793343         | 0          | 0.1364723         |
| 0.1125298                         | 0.4153417         | 0.3665256                          | 0.1356850.1772768         | 0.06379401        |            |                   |
| 0.06569477                        | 0.5265387         | 0.3271634                          | 0.04557893                | 0.2254191         | 0          | 0.458157          |
| 0.3053751                         | 0.8755794         | 0.5345165                          | 0.7280656                 | 0.1755129         | 0.02032148 |                   |
| 0.0432860.4262698                 | 0.1040652         | 0.06333589                         | 0.1001863                 | 0.1378948         |            |                   |
| 0.2852676                         | 0                 | 0.08972047                         | 0.3128877                 | 0.2382807         | 0.1802969  | 0.2561023         |
| 0.1214942                         | 1.0418380.5427398 | 0                                  | 0.2154387                 | 0                 | 0.0627724  | 0.5137586         |
| 0.3042714                         | 0.03300102        | 0.2876057                          | 0.6135321.4836580.1029116 | 0                 |            |                   |
| 0.08908609                        | 0.5377758         | 0.06734602                         | 0.3246735                 | 0.08841627        | 0.09512456 |                   |
| 0.06210931                        | 0.2992486         | 0.3492880.07069757                 | 0.1016660.5189293         | 0.1271283         |            |                   |
| 0.4601490.06425882                | 0.06967365        | 0.4672595                          | 0                         | 0.03686321        | 2.995652   |                   |
| 0.06681456                        | 0                 | 0                                  | 0.1559827                 | 0.2348741         | 0.1524989  | 0.07822193        |
| 0.06694135                        | 0.4934985         | 0.5992358                          | 0.09638822                | 0.1154136         | 0          | 0.04482604        |
| 0                                 | 0.06506872        | 0.04013435                         | 0.1388901                 | 0.0547513         | 0          | 2.0241530         |
| 0.06174695                        | 0.09407491        | 0.03939485                         | 0.03703348                | 0.2473839         | 0.2580694  |                   |
| 0.1774998                         | 0                 | 0.2851684                          | 0.1266718                 | 0.2039196         | 0.5056201  | 0.1998759         |
| 1.2402457.4170140.08156784        | 0.4761947         | 0.1046828                          | 0.1099006                 | 0.07649196        |            |                   |
| 0.09457933                        | 0.5205352         | 0.008704192                        | 0.1212901                 |                   |            |                   |
| TCGA-E7-A7DU                      | 28                | 0                                  | 0.1289210.08271942        | 0                 | 0.1669497  | 0                 |
| 0.3560624                         | 0.7058298         | 0                                  | 0.02547873                | 0.07705912        | 0.4838069  | 1.003662          |
| 0.05573473                        | 0.07770392        | 0.06103837                         | 0.3265543                 | 0.2246512         | 0.01536218 |                   |
| 0.1692684                         | 0.1059768         | 2.62197582.146140.07122464         | 0.05543894                | 0                 |            |                   |
| 0.09256198                        | 0                 | 3.1711920.08542519                 | 0.06448321                | 0.05539694        | 0.8197754  |                   |
| 0.1854369                         | 0.3298825         | 0.07446432                         | 0.1964290.09516393        | 0.08394027        |            |                   |
| 0.03210263                        | 0.08017978        | 0.06659742                         | 0.1192887                 | 18.521770.2453824 |            |                   |

|              |            |            |            |             |            |            |             |
|--------------|------------|------------|------------|-------------|------------|------------|-------------|
| 0.4369958    | 0          | 1.3503     | 0.4704667  | 6.1446870   | 0.1371932  | 0.4636483  |             |
| 0.02279425   | 0          | 1.5497232  | 5.785120   | 0.009192202 | 2.3697580  | 0.08684556 |             |
| 1.0939810    | 0.01487923 | 0.2750572  | 0.07729806 | 0.6582354   | 0.1665694  |            |             |
| 0.01143276   | 0.3592636  | 0.09560473 | 0.2076313  | 0.4687434   | 5.302279   |            |             |
| 0.09749862   | 0          | 0          | 0.2931995  | 0.02832067  | 0.1166251  | 0.1146144  |             |
| 0.1960428    | 0.5589093  | 0          | 0.1500492  | 0.1345510   | 0.06659742 | 0.4687434  |             |
| 0            | 0          | 0.08972265 | 0.1612436  | 0.01052295  | 0.47353    | 0          | 0.3331388   |
| 1.1067410    | 0.01212066 | 0          | 0          | 0           | 3.9295592  | 5.863780   | 0.0211036   |
| 0.1166251    | 0.9285583  | 0          | 0          | 0           | 3.5877720  | 0.6036176  | 0.009129084 |
| 0.1517095    | 0.1382306  | 0.07563745 | 0.5329735  | 0           | 0.06103837 | 0.2720583  |             |
| 2.1167460    | 0.4580351  | 0.1661908  | 0.9879428  | 0.05440771  | 0.06505691 |            |             |
| 0.2540987    | 0          | 1.5712590  | 6.992729   | 0.2664270   | 0.1354147  | 0.1276160  | 0.1774853   |
| 0.7420328    | 1.4079770  | 0          | 0          | 0           | 0.1559146  | 0.8486340  | 0           |
| 0.3798647    | 0          | 0.09186428 | 0          | 0           | 0.2182805  | 0.8444762  | 0.0472377   |
| 0.1168114    | 1.42871    | 1.06837    | 0.4144495  | 0.3445993   | 0.6232156  | 0.4801761  |             |
| 0.0909502    | 0.0421221  | 0          | 0.7952099  | 0.1617787   | 0.1969227  | 0.01297905 |             |
| 0.1429133    | 0.03284994 | 0.07829118 | 0.1673743  | 0.9728243   | 0.5978852  |            |             |
| 0.1868585    | 0.3317784  | 0.1789332  | 2.257250   | 0.1969227   | 0          | 0          | 0.3252845   |
| 0.4437134    | 0.61267    | 0          | 0.4663395  | 0.2119535   | 0.1423753  | 0.08532551 |             |
| 0.1339267    | 0.03077608 | 0.3901431  | 0.03489849 | 0.4230153   | 0.2749021  |            |             |
| 0.1053855    | 0          | 0.8270382  | 0          | 0           | 0.2107319  | 0.1666912  | 0.1976323   |
| 0.9537908    | 0.3995845  | 0.02406977 | 0.3081684  | 0.1016175   | 0.1528192  |            |             |
| 0.5057875    | 0.06924618 | 0.1276160  | 2.886472   | 0.06466379  | 0.4868440  | 0.05268297 |             |
| 0            | 0.08366586 | 0.1387551  | 0.7014289  | 0.8439830   | 0.2790991  | 0          |             |
| 0.04645741   | 0          | 0.08991573 | 0.04159497 | 0           | 0          | 0.03212828 | 0.6742988   |
| 0.06399413   | 0          | 0.1020714  | 0.03838125 | 0.3100494   | 0.6151614  | 0          | 0           |
| 0.4766882    | 0.1969227  | 0.05283523 | 0.2666074  | 0           | 2.1423044  | 0.072121   |             |
| 0.1690727    | 0.08225418 | 0.1084925  | 0          | 0.04756546  | 0.0490107  | 1.37322    |             |
| 0.05412581   | 0.1257043  |            |            |             |            |            |             |
| TCGA-DK-A3WY | 4967       | 0          | 0.1272691  | 0.1663435   | 0          | 0.2354437  | 1.475685    |
| 48.9543      | 0.5419447  | 0.5961114  | 0.3612965  | 0.1946792   | 0.05589395 |            |             |
| 2.6005270    | 0.0379054  | 0.8125629  | 0.1069845  | 0.1504085   | 0.5356115  |            |             |
| 0.02653252   | 0.5852337  | 0.05055115 | 0.02320828 | 0.2324864   | 3.16357565 | 0.0156     |             |
| 0.2343735    | 0.3344526  | 1.3671790  | 0.05076444 | 0.9846942   | 0.9207530  | 0.7027554  |             |
| 0.0353650    | 0.1822905  | 0.7493256  | 0.2881515  | 0.1507666   | 0.5309071  |            |             |
| 0.1292748    | 1.0647060  | 0.1841439  | 0.1472525  | 0.1758943   | 0.07304901 |            |             |
| 0.7850684    | 0.2641088  | 0.7626023  | 0.2662942  | 0.3862898   | 0.6266236  |            |             |
| 0.2580215    | 7.3635760  | 0.07524185 | 1.0171280  | 0.2125207   | 0          | 0.3147874  | 0           |
| 0.1575421    | 1.2532470  | 0.05012989 | 0          | 0.09473364  | 0.3645810  | 0.4243368  |             |
| 0.2300488    | 0.08478628 | 0.4266373  | 0.5481172  | 0.09405232  | 0.1515643  |            |             |
| 0.2846374    | 0.3105621  | 4.690084   | 9.478850   | 0.2673594   | 0.1979897  | 0.2951421  |             |
| 0.2572825    | 0.8542661  | 0          | 0.3981057  | 0.1075172   | 0.07663167 | 0.1730481  |             |
| 0.1371543    | 0.3443662  | 0.2697572  | 0.2556715  | 0.1542458   | 0          | 0          |             |
| 0.04920725   | 0.0221080  | 0.3058724  | 0.1947761  | 0.1458324   | 0.2832197  |            |             |

|              |            |            |            |            |             |            |           |
|--------------|------------|------------|------------|------------|-------------|------------|-----------|
| 0.9378894    | 1.4090560  | 0.01994227 | 0.08705624 | 0          | 2.2545641   | 2.181091   | 1.192801  |
| 0.2938015    | 0.0983790  | 0.5472268  | 0.03198079 | 0.7129584  | 0.02792751  |            |           |
| 0.1248047    | 0.03567963 | 3.4282050  | 0.5202158  | 0.01502019 | 0.2381467   |            |           |
| 1.1232420    | 0.4927701  | 1.2668090  | 0.5261446  | 0          | 0.03347572  | 0.1746813  |           |
| 3.2247290    | 0.04565044 | 1.7732020  | 0.09114525 | 5.0807170  | 0.3282314   | 3.817721   |           |
| 0.1858096    | 0.1670996  | 1.21527    | 0.05478676 | 0.2322909  | 0.03713325  |            |           |
| 0.4199362    | 0.04866979 | 0          | 1.8931040  | 0.03089669 | 0.2107035   | 0.2156124  |           |
| 0.0855094    | 0.4654225  | 0          | 0.2878271  | 0.2459156  | 0.1562490   | 0.3470531  | 0         |
| 0.1450413    | 0.07468139 | 1.6161280  | 0.7859384  | 0.4145107  | 0.1601594   |            |           |
| 0.2849301    | 0.52083    | 0.1157161  | 1.0709490  | 0.6456122  | 0.7147976   | 0.09976097 |           |
| 0.1039560    | 0.3444507  | 1.2502190  | 0.2661764  | 0.1439997  | 0.3915007   | 0.03918949 |           |
| 0.8467582    | 0.0429378  | 0.2957816  | 0.4890721  | 0.4134424  | 0.2049603   |            |           |
| 0.07278386   | 0.1090373  | 1.04364    | 0.7932641  | 0.3239993  | 0           | 5.72913    |           |
| 0.2140778    | 0.04866979 | 0.8795584  | 0.1875767  | 0.4113221  | 0.5860595   |            |           |
| 1.0307080    | 0.1169892  | 0.1836260  | 0.81018    | 0.09170101 | 0.1084579   | 0.347996   |           |
| 0.1005110    | 0.1528833  | 0.03530274 | 0.3401840  | 0.1205528  | 0.05778661  | 1.10566    |           |
| 0.3974261    | 0.4359121  | 0.0957350  | 0.2244129  | 0.3742388  | 0.1226078   | 0.2304822  |           |
| 1.4548360    | 0.03797719 | 0.03499468 | 0          | 0.4255684  | 0.3738047   | 0.2600398  |           |
| 0.2223055    | 0.1376564  | 0.4565910  | 0.2564598  | 1.3252980  | 0.05478676  | 0.08746763 |           |
| 0.3626032    | 0.05095795 | 0          | 0.1109546  | 0.3193713  | 0.0789447   | 0          |           |
| 0.008810173  | 0.8628915  | 0.1290345  | 0          | 0.05347188 | 0.1119595   | 0.03367954 |           |
| 0.2844945    | 0.4840633  | 0.1765581  | 0          | 0.4705804  | 0           | 0.05795362 |           |
| 1.2857050    | 0.1136088  | 0.7049515  | 10.163320  | 0.1483613  | 0.6315576   | 0.3570081  |           |
| 0.6246715    | 0.4695601  | 0.08063789 | 1.2910710  | 0.03957948 | 0.3545532   |            |           |
| TCGA-G2-A2EF | 1884       | 0          | 0.3779301  | 0.2213210  | 0.2829926   | 0.01380913 |           |
| 39.393890    | 0.06270093 | 0.2354418  | 0.6568668  | 0.24776    | 0.2311851   | 1.869932   |           |
| 0.5065263    | 1.0341140  | 0.1118413  | 0.01914185 | 0.08520627 | 0           | 0.03920012 |           |
| 0.05897312   | 0.0443043  | 0.4807984  | 0.60973740 | 0.854740   | 0.2112797   | 0.6384656  |           |
| 0.6628384    | 0.1938173  | 0          | 0.6510021  | 0.4608     | 0.2025339   | 0.09666393 |           |
| 1.5258160    | 0.09707248 | 0.2110617  | 0.5717150  | 0.2924846  | 0.08634841  | 0.07951234 |           |
| 0.1700878    | 0.1469037  | 0.1162082  | 0.2272130  | 0.2714817  | 0.3425406   | 0.03389014 |           |
| 0.005586532  | 0.7974774  | 1.8060522  | 0.6366360  | 0.04787857 | 0.7859198   | 0.5886616  |           |
| 0            | 0.6142788  | 0          | 0.01844574 | 0.5316516  | 0.09569729  | 0.09092379 |           |
| 0.2813149    | 0          | 0.05062833 | 0.3695664  | 0.02697598 | 0.6264962   | 0.1453262  |           |
| 0.03989881   | 0.4484680  | 0.1572910  | 0.7509545  | 1.33205    | 0.3590374   | 1.003758   |           |
| 0.06999253   | 0          | 0.1739486  | 0.16802    | 0.0407006  | 0.1333296   | 0.3762896  |           |
| 0.2438147    | 0.3578755  | 0.2967358  | 0.1690433  | 0.2288724  | 0.0697248   |            |           |
| 0.2290192    | 0.9815107  | 0.02703313 | 0.09915466 | 0          | 0.003672367 | 0.6896243  |           |
| 0.1391961    | 0          | 0.1143233  | 0.6759160  | 0.3235910  | 0.01846547  | 0          | 0.1521592 |
| 3.5178441    | 1.1487780  | 0.1402158  | 0.1509799  | 0.4725792  | 0.0814012   | 0.9802643  |           |
| 0.07108434   | 0.02647228 | 0.1135199  | 0.9874682  | 0.05962448 | 0.1805609   |            |           |
| 0.0700904    | 0.1818476  | 0.6088624  | 0.1688421  | 0.1218298  | 0.5952018   | 0          |           |
| 0.02130157   | 0.3010441  | 0.6790217  | 0.1307191  | 0.8180461  | 0.2029942   |            |           |
| 0.7997736    | 0.5506392  | 0.3178558  | 0.3990466  | 0.03544344 | 1.181057    |            |           |

|              |            |             |            |            |            |            |
|--------------|------------|-------------|------------|------------|------------|------------|
| 0.2091744    | 0.4958903  | 0.5670950   | 0.3785582  | 0.18582    | 0          | 0.2932339  |
| 0.9348646    | 0.01966046 | 0.2011151   | 0          | 0.4625029  | 0.1727611  | 0.05134663 |
| 0.1424521    | 0.7511193  | 0.4308449   | 0.4907553  | 0.06411879 | 0.2307349  |            |
| 0.02376097   | 1.7901581  | 1.2592190   | 0.2038281  | 0.2039729  | 0.8285480  | 0.2761257  |
| 0.2806078    | 0.6524815  | 1.0772680   | 0.3174039  | 0.1911006  | 0.1095920  | 0.770882   |
| 0.1505562    | 0.1603545  | 0.07700172  | 0.3324987  | 0.7107795  | 0.1092903  |            |
| 0.1233129    | 0.7072970  | 0.3719482   | 0.2173703  | 0.2084151  | 0.2960366  |            |
| 0.6230584    | 1.2338990  | 0.4810636   | 0.1558429  | 0.3472010  | 0.6584155  | 1.45559    |
| 1.8016940    | 0.03580815 | 0.3875709   | 1.2636360  | 0.02981224 | 0.1637760  | 0.1635851  |
| 1.3425550    | 0.4279147  | 0.5074626   | 0.3556460  | 0.09593713 | 0.2443966  | 0          |
| 0.1322865    | 0.08422204 | 0.07671125  | 0.4780268  | 3.3839110  | 0.5977488  |            |
| 0.6657203    | 0.6042816  | 0.1092003   | 0.4301865  | 0.1134821  | 0.05333182 |            |
| 0.01502239   | 0.3866557  | 0.3117538   | 0.0335780  | 0.1579675  | 0.7603114  |            |
| 0.7721971    | 0.2546269  | 0.2627843   | 0.09684735 | 0.3569843  | 1.7755680  |            |
| 0.4035218    | 0.04614697 | 0.2594082   | 0.2472798  | 0.08629328 | 0.08709651 |            |
| 0.0502348    | 0.0132019  | 0           | 0.9412848  | 0.09853003 | 0.1935534  | 1.327002   |
| 0.07836741   | 0.05625707 | 0.3620641   | 0.7280555  | 0          | 0.03115907 | 0.3160797  |
| 0.9163116    | 0.1475103  | 0.9689240   | 0.1988046  | 1.2211374  | 0.3925380  | 0.08850616 |
| 0.2583504    | 0.2271746  | 0.3577469   | 0.07746528 | 0.03420815 | 0.9327972  |            |
| 0.01574098   | 0.3697538  |             |            |            |            |            |
| TCGA-BT-A20V | 154        | 1           | 0.16976    | 0.1815383  | 0.07695644 | 0.1766534  |
| 31.404640    | 0.07711422 | 0.2323550   | 0.4382034  | 0.04193724 | 0.08033011 |            |
| 0.5119276    | 0.3933329  | 0.1720082   | 0.2746053  | 0.05023367 | 0.1791662  |            |
| 0.04622115   | 0.1264284  | 0.1044791   | 0.0872173  | 1.97083327 | 0.943640   | 0.3907788  |
| 1.2090740    | 0.2930841  | 0           | 0          | 1.2588660  | 0.1061374  | 0.04559086 |
| 0.2119609    | 0.1357442  | 0.1838491   | 0.07544046 | 0.02349555 | 0.07895039 |            |
| 0.1032781    | 0.01649669 | 0.05480868  | 0.1472592  | 4.1156490  | 0.1346307  |            |
| 0.1198803    | 0          | 0.4274143   | 3.5953093  | 0.8692240  | 0.2258159  | 0.5451081  |
| 0.2519306    | 0.3808857  | 0.009456306 | 2.9950660  | 0.07522492 | 0.2858904  |            |
| 0.2369289    | 0          | 0.003061346 | 0.1584576  | 0.06361515 | 0.09849416 | 0.06854207 |
| 0.02822699   | 0.09097496 | 0.4383671   | 0.5592353  | 0.5510983  | 0.651298   |            |
| 0.1203599    | 0.08252871 | 0           | 0.2171690  | 0.02330749 | 0          | 0.3773037  |
| 0.2299870    | 0.3570546  | 0.2058137   | 0.06644006 | 0.4047978  | 0.1644260  | 0.2314613  |
| 0.1052097    | 0          | 0.06153367  | 0          | 0          | 0.3072699  | 0.1094181  |
| 0            | 0          | 0           | 0.6488649  |            |            |            |
| 1.07348      | 0.06982588 | 1.0886380   | 0          | 2.1794131  | 0.0642750  | 0.2204393  |
| 0.1389436    |            |             |            |            |            |            |
| 0.8211687    | 0.1919615  | 1.4137510   | 0.2095402  | 0          | 0.2141635  | 1.978602   |
| 0.07030366   | 0.2838676  | 0.0150262   | 0.3573631  | 1.1236920  | 0.2275234  | 0.05746015 |
| 0.7018068    | 0          | 0.1004673   | 0.2129781  | 1.4253140  | 0.01712576 | 1.2195640  |
| 0.6154766    |            |             |            |            |            |            |
| 0.8663778    | 0          | 0.1606226   | 0.7435359  | 0.08358324 | 1.6412710  | 0.164426   |
| 0.1293104    | 0          | 0.1575391   | 0.0730339  | 0.4996489  | 0.4485461  | 0.1787523  |
| 0            | 0          | 0           | 0.1924731  | 0.4656088  | 0.1816296  | 0.1439711  |
| 0.5682922    |            |             |            |            |            |            |
| 0.4689345    | 0.1735960  | 0.07560293  | 0.3264734  | 0          | 0.9880288  | 0.2843146  |
| 0.1166278    | 0.09613408 | 0.7482407   | 0.3907788  | 0.3038764  | 0.1228934  |            |
| 0.4559086    | 1.1290790  | 0.1497013   | 0.05199879 | 0.0369202  | 0.4508405  |            |

|             |              |            |            |            |            |
|-------------|--------------|------------|------------|------------|------------|
| 0.08876096  | 0.1080430    | 0.1281788  | 0.1176155  | 0.2703501  | 0.06443248 |
| 0.1224414   | 1.20093      | 0.2246318  | 0.4613453  | 0.5460974  | 0.1799835  |
| 1.3021391   | 1.3226360    | 0.2160859  | 0.04593888 | 0.1023468  | 0.2677043  |
| 0.1460678   | 1.1196610    | 0.05629554 | 0.3917037  | 0.2471157  | 0.02343455 |
| 0.1228878   | 0.2204393    | 0.6838629  | 0.1376066  | 0.1340310  | 0.3085745  |
| 0.07541345  | 0.1930458    | 0.05297529 | 0.7657202  | 0          | 0          |
| 0.2601438   | 0.2710808    | 0.1308259  | 1.4798340  | 0.1188544  | 0.4891205  |
| 0.2508891   | 0.1572099    | 0.08856502 | 0.2279543  | 0.1575391  | 0          |
| 0.004434778 | 0.3906487    | 0.1300719  | 0.2001550  | 0.1712901  | 0.26458    |
| 1.3072620   | 0.3281349    | 0          | 0          | 0          | 0          |
| 1.973113    | 0.1147013    | 0.3498833  | 0.1202489  | 0.2396243  | 0          |
| 0           | 0.07745165   | 0.07022163 | 0.5616794  | 0.1176046  | 0.0315872  |
| 0.2551661   | 0.1320701    | 0.03784901 | 0.07347977 | 0.1961536  | 0.4861934  |
| 0.1304478   | 1.2710870    | 2.1157012  | 5.448330   | 0.2852459  | 0.1015409  |
| 0.08928774  | 0.2812146    | 0.1957283  | 0          | 0.5045266  | 0          |
| 0.2216844   | TCGA-K4-A3WV | 646        | 0          | 0.1223666  | 0.3107843  |
| 0.2773590   | 0.6508257    | 0          | 36.784110  | 0.1065822  | 0.2112250  |
| 0.8095170   | 0.2105774    | 0.03022923 | 0.9081724  | 0.3690081  | 1.3609080  |
| 0.6860618   | 0.2087873    | 0.1086284  | 0.1004474  | 0.1332687  | 0.1458116  |
| 0.1506213   | 0.1257361    | 4.572936   | 29.371290  | 0.1830930  | 0.1644388  |
| 0.5633629   | 0.05491006   | 0          | 0.8410204  | 0.05067634 | 0.1147591  |
| 0.03286284  | 0.6159940    | 0.1344515  | 0.1630787  | 0.3533926  | 0.4194955  |
| 0.1354886   | 0.1849545    | 0.1436962  | 0.8561634  | 0.4345796  | 0.0353825  |
| 11.2293     | 0.2426116    | 1.0945550  | 0.06647387 | 0.6777960  | 0.9170182  |
| 1.4139670   | 0.203466     | 0.3143402  | 0.3380529  | 0          | 1.9748660  |
| 0.0654365   | 2.3095270    | 0.05422368 | 0.1030379  | 0.5806631  | 0          |
| 0.04634031  | 0.2896281    | 0.5961166  | 0.2129899  | 0          | 0.04747539 |
| 0.1885328   | 0.1296345    | 0.2463440  | 0.8342105  | 0.1408407  | 0.2313544  |
| 0.2974420   | 0.02553956   | 0.1217533  | 0          | 0.2075548  | 0.1586482  |
| 0.4651898   | 0.1105196    | 0.07019247 | 0.6527612  | 0.01596379 | 0.3890488  |
| 0.1185217   | 0.05561403   | 0.1516746  | 0          | 0.09758045 | 0.1673939  |
| 0.04057608  | 0.4105604    | 0          | 0.0612697  | 0.3524333  | 1.5241250  |
| 0.06830764  | 0            | 0.04715103 | 0.2586479  | 2.4324641  | 0.0809870  |
| 0.03972431  | 0.4319116    | 0.7610341  | 0.3113321  | 1.2256270  | 0.2416654  |
| 0.04499891  | 0.3473403    | 2.4465110  | 0.5115442  | 0.02707799 | 0.1030379  |
| 0.5399869   | 0.1230027    | 0.13461    | 0.1897038  | 0          | 0.03620947 |
| 0.7675948   | 1.4459650    | 0.08641224 | 0.9909708  | 0.04929426 | 0.6869534  |
| 0.0322760   | 0.03859337   | 0.1591120  | 0.1204971  | 0.7409076  | 0.2963043  |
| 0.07699925  | 0            | 0.7191972  | 0          | 0.6402796  | 0.7409447  |
| 0.04294945  | 0            | 0.3418656  | 0          | 0.6474471  | 1.1327190  |
| 0.4364079   | 0.2075548    | 1.1065510  | 0.1690089  | 0.4171052  | 1.0354270  |
| 0.5491006   | 0            | 0.7769363  | 0.6262053  | 0.08406772 | 0          |
| 0.8475461   | 1.2675670    | 0.2279809  | 0.3815930  | 0.6161782  | 0.7731707  |
| 0           | 0.199903     | 0.02661285 | 0.6918827  | 0.3518941  | 0.1946990  |
| 0.07699493  | 0.1412995    | 0.1558992  | 0          | 0.09929057 | 0.1923678  |
| 0.3701012   | 0.2586479    | 0.1574553  | 0.2358833  | 0.2536780  | 0.3813534  |
| 0.07787962  | 0.1324548    | 0.2950949  | 0.3087469  | 0          | 0.2084498  |
| 0.0202895   | 0.5618443    | 0.4086422  | 0.06756845 | 0.5188264  | 0          |
| 0.6755139   | 0.3636954    | 0.3036388  | 0.5646221  | 0.1630787  | 0.1371347  |
| 0           | 0.2044248    | 0.07158242 | 0          | 0          | 0.1119457  |
| 0.3517212   |              |            |            |            |            |

|              |            |            |            |            |            |            |
|--------------|------------|------------|------------|------------|------------|------------|
| 0.6601144    | 1.8963470  | 0.4283635  | 1.29275    | 0.08439484 | 0.1586482  | 0.1468309  |
| 2.0539270    | 0.03785248 | 0          | 0.0639336  | 0.4765330  | 0.1250114  | 0.1923678  |
| 0.3292520    | 0.7368526  | 1.10998    | 0          | 0.02365264 | 0          | 0.1377984  |
| 0.2522032    |            |            |            |            |            |            |
| 0.4800621    | 0.9129812  | 0          | 0.01122063 | 1.8582813  | 0.0223040  | 0.02791438 |
| 0.2151231    | 1.2724490  | 0.2300949  | 0.1593810  | 0.1450209  | 0.9202556  | 0.02728236 |
| 0            | 0.5485994  | 0.6619767  | 0.06268634 | 1.0907450  | 1.0166942  | 0.131485   |
| 0.2306857    | 0          | 0.06436045 | 0.4729792  | 0.1034624  | 0.02907436 | 0.6109711  |
| 1.0060750    | 0.09587684 |            |            |            |            |            |
| TCGA-GU-AATQ | 213        | 1          | 0.1181505  | 0.06317397 | 0          | 0.2732181  |
|              |            |            |            |            |            | 0.2266469  |
| 27.561870    | 0.1029099  | 0.2146814  | 0.5929572  | 0          | 0.1167508  | 0.2000938  |
| 0.6334116    | 0.7665108  | 0.1276962  | 0.07330676 | 0.06992377 | 0.08313134 | 0          |
| 0.07039385   | 0.04847724 | 0.1214039  | 2.79673936 | 0.370510   | 0.2039822  | 0.6033377  |
| 1.3598810    | 0.7479346  | 0.4273912  | 0.1957212  | 0.2216103  | 0          | 0.4382517  |
| 0.1770259    | 0.1889519  | 0.6824332  | 0.1350140  | 0.04360681 | 0.09615952 |            |
| 0.06017865   | 0.1837032  | 0.07629206 | 0.9565755  | 13.112730  | 0.09370098 |            |
| 0.1112466    | 0.05501446 | 0.9519168  | 0.5389529  | 1.8286820  | 0.07858225 |            |
| 0.9105291    | 0.05222486 | 0          | 0.5698551  | 0.3633240  | 0.03685611 | 0.2908635  |
|              |            |            |            |            |            | 0          |
| 0.06595959   | 0.06346112 | 0.04261302 | 0.1575488  | 0.4427520  | 0.1371009  |            |
| 0.2862256    | 0.01309704 | 0.0158293  | 0.2033980  | 0.04324661 | 1.1506690  | 0.4532937  |
| 0.3909205    | 0.1608285  | 0.09863842 | 0          | 0.09732999 | 0          | 0.1750652  |
|              |            |            |            |            |            | 0          |
| 0.2667792    | 1.0843840  | 0.05729732 | 0.2260686  | 0          | 0.07629206 | 0.8591659  |
|              |            |            |            |            |            | 0          |
| 0            | 0.1199143  | 0          | 0.06027391 | 0.2086393  | 0          | 0.1183173  |
|              |            |            |            |            |            | 0.9477246  |
| 1.4036910    | 0.06942539 | 0          | 0          | 0.4281193  | 0.5871636  | 0.7407198  |
|              |            |            |            |            |            | 0.07671124 |
| 0.1087905    | 0.1905071  | 0          | 0.4786782  | 0.1750042  | 0          | 0.2235819  |
| 2.3516250    | 0.5927029  | 0.03137404 | 0.09948774 | 0.1737939  | 0.5542351  |            |
| 4.3523990    | 0          | 0.06992377 | 0.1824363  | 1.9105140  | 0.09535422 | 0.7716348  |
|              |            |            |            |            |            | 0          |
| 0.7421367    | 0.1246558  | 0.8943275  | 0.04851468 | 0.1163454  | 1.361529   |            |
| 0.1144381    | 0.1173888  | 0.1551272  | 0          | 0          | 0.3863869  | 0.2081209  |
|              |            |            |            |            |            | 0          |
| 0.06453673   | 0.07335261 | 0          | 0.2679169  | 0.8101420  | 0.6012106  | 0.3287463  |
| 0.4351620    | 0.2416404  | 0.4209481  | 0.1514804  | 0          | 0.5001115  | 1.3191920  |
|              |            |            |            |            |            | 0          |
| 0.9671341    | 0.0879050  | 0.3625602  | 0.2500165  | 0.3173056  | 0.3143290  | 0.1688885  |
| 0            | 0.5263378  | 0.06177631 | 0.1503926  | 0.1189474  | 0.1364311  | 0.3763193  |
| 0.2690643    | 0.3621738  | 0.1857399  | 0.3573495  | 0.4281193  | 0.3040605  |            |
| 0.08351056   | 1.3961450  | 0.1841070  | 0.3007852  | 0.06394556 | 0.1424637  | 0.5216911  |
| 0.1016610    | 0.5676783  | 0.03918086 | 0.4681353  | 0.2023398  | 0.2283414  |            |
| 0.0244366    | 0.1534225  | 0.2467932  | 0.1915442  | 0.1998934  | 0.22027    | 0          |
| 0.1207266    | 0          | 0.3552866  | 0          | 0          | 0          | 0.4359574  |
|              |            |            |            |            |            | 0.07546728 |
| 0.1821058    |            |            |            |            |            |            |
| 0.3051682    | 0.1378681  | 1.4625480  | 0.04656402 | 0.1750652  | 0.4068236  |            |
| 0.1586528    | 0          | 0          | 0.1419808  | 0.2509714  | 0          | 0.09286993 |
|              |            |            |            |            |            | 0.4792259  |
| 0.07947693   | 0.1674034  | 1.0762960  | 0.1144381  | 0          | 0.3029609  | 0.1596608  |
|              |            |            |            |            |            | 0          |
| 0.1158804    | 0.1906     | 0          | 0.02166805 | 0.3680522  | 1.2874280  | 0.0539052  |
| 0.09774642   | 0.5584579  | 0.2338601  | 0.08793689 | 0.1775918  | 0.7353505  |            |
| 0.0526847    | 0          | 0.2948832  | 0          | 0.0605265  | 0.4949872  | 0          |
|              |            |            |            |            |            | 1.22708    |
| 5.5130670    | 0.05810544 | 0.1413420  | 0.2609616  | 0.0363264  | 0          | 0.8989261  |

1.7464730.02057188

|              |             |             |            |             |            |             |            |
|--------------|-------------|-------------|------------|-------------|------------|-------------|------------|
| TCGA-G2-A3VY | 536         | 0           | 0.2701449  | 0.5898129   | 0.08164225 | 0.6351107   | 0          |
| 46.033040    | 0.3190576   | 0.1643352   | 0.6198470  | 0.2335765   | 0.07400801 |             |            |
| 0.9956805    | 0.7093804   | 0.4075423   | 0.06385222 | 0.05329235  | 0.4963082  |             |            |
| 0.04903551   | 0.1140076   | 0.1108407   | 0.09252788 | 4.39787631  | 7.99040    | 0.1399184   |            |
| 0.03630264   | 0.4145730   | 0.1616310   | 1.8566950  | 0.0372922   | 0.1689001  | 0.02418342  |            |
| 0.5487360    | 0.3148138   | 0.3600239   | 0.5201160  | 0.4287534   | 0.1578658  | 0.02617425  |            |
| 0.1223070    | 0.3325221   | 0.4360945   | 0          | 16.753450   | 0.6070202  | 0.3603427   |            |
| 0.02096461   | 0.6801588   | 0.8802055   | 3.4031810  | 0.4192399   | 1.0698540  | 0.03980314  |            |
| 0.3600239    | 0.9688556   | 0.02886268  | 0.04213479 | 1.7734510   | 0.3412103  |             |            |
| 0.7540658    | 0           | 0.008119371 | 0.1320833  | 0.3374431   | 0.1828599  | 0.03635777  |            |
| 0.03992761   | 0.5368611   | 0.1430950   | 0.3708042  | 2.630944    | 3.8348     | 0.2340955   |            |
| 0.6741644    | 0.004698575 | 0.2815905   | 0.01236333 | 0.1018249   | 0.450312   |             |            |
| 0.4279105    | 0.2643233   | 0.5681931   | 0.2620147  | 0.1762139   | 0.07157426 |             |            |
| 0.05814594   | 0.6138869   | 0.1674237   | 0.06763161 | 0.1697291   | 0.1407811  |             |            |
| 0.004593772  | 0.6201558   | 0.02902011  | 0          | 0.06786783  | 3.0714260  | 0.005291251 | 0          |
| 0            | 0.0271909   | 4.0275571   | 4.113480   | 0.1461636   | 0.3224457  | 0.5392951   |            |
| 0.05091247   | 2.3713580   | 0.1778391   | 0          | 0.1704028   | 1.3966940  | 0.2610454   |            |
| 0.7528802    | 0.003985283 | 0.1895613   | 0.4967135  | 1.0258530   | 0.05587895 |             |            |
| 1.5821460    | 0.06138869  | 0.02664618  | 0.2722939  | 2.2494830   | 0.1726011  | 0.3999087   |            |
| 0.3627514    | 0.8307529   | 0.04750316  | 0.08520139 | 1.3804160   | 0.04433628 |             |            |
| 0.9673371    | 1.6571590   | 0.1729711   | 0.1182301  | 0.4456841   | 0.5036257  | 1.855252    |            |
| 0.6146495    | 0.2212424   | 0.02459331  | 0          | 0           | 0.7487064  | 0.4630869   |            |
| 0.3853777    | 0.05091247  | 1.5385570   | 0.1658292  | 1.0129130   | 0.3463521  |             |            |
| 0.02972264   | 0.7623193   | 0.8127154   | 2.7426630  | 0.3824535   | 0.1134001  |             |            |
| 2.4874380    | 0.3454063   | 0.06017365  | 0.7557321  | 1.7667970   | 0.1588165  | 0.1930773   |            |
| 0.09792061   | 1.3345880   | 0.1177069   | 0.2292432  | 0.05665978  | 0.08318468 |             |            |
| 0.1147246    | 0.3417786   | 0.1948451   | 0.07078075 | 0.5617295   | 0.6525817  |             |            |
| 1.2745670    | 0.2430178   | 0.7093804   | 0.1403170  | 0.0286554   | 0.3898885  | 0.162868    |            |
| 0.8520139    | 0.1162213   | 0.9439760   | 0.8374047  | 0.7016698   | 0.07458439 |             |            |
| 0.6052911    | 0.1753963   | 0.9135961   | 1.435520   | 0.4722808   | 0.9988778  | 0           |            |
| 0.08310733   | 0           | 0.8875613   | 0.05267677 | 0           | 0.2759837  | 0.0741417   |            |
| 0.7764841    | 1.2491262   | 0.5293480   | 0.3677664  | 0.8648377   | 0.2306768  | 0.2501734   |            |
| 0.1573791    | 0           | 0.1114210   | 0.02117163 | 0.3666156   | 0.1379919  | 0.03539038  |            |
| 0            | 0.03028664  | 0.6124148   | 1.3329850  | 0.1566516   | 0          | 0.2028089   |            |
| 0.1237291    | 0.4023384   | 0.2905312   | 0.06283882 | 0           | 0.8836088  | 3.728608    |            |
| 0.0205419    | 0.3631746   | 0.1276885   | 0.1425890  | 0.1474463   | 0.1587777  |             |            |
| 0.9807820    | 0.2007681   | 0.03897695  | 0.6534254  | 0.05731081  | 0.1845209  |             |            |
| 0.7545082    | 0.02260773  | 1.5275232   | 0.5762040  | 0.1845209   | 0          | 0.0473622   |            |
| 0.5469522    | 0.01384307  | 0.06418657  | 0.7172307  | 0.003938085 | 0.1881461  |             |            |
| TCGA-XF-AAN8 | 118         | 1           | 0          | 0           | 0.08555764 | 0.2182194   | 0.07240917 |
| 62.1782      | 0.7397477   | 0.2914924   | 0.1722164  | 0.1623934   | 0.1165611  | 11.06954    |            |
| 0.06323825   | 1.0057780   | 0.08924209  | 0.3094793  | 0           | 0          | 2.3638090   | 0.04216769 |
| 0.07743758   | 0           | 0.95960961  | 0.497940   | 0.4818860   | 0.3258413  | 0.08469123  |            |

|              |             |            |             |             |             |            |
|--------------|-------------|------------|-------------|-------------|-------------|------------|
| 0.1493439    | 0.6827152   | 0.0321940  | 0.1520593   | 0.2500227   | 0.07540837  | 0          |
| 1.0219870    | 0.04792699  | 1.7588530  | 0.2304079   | 0.05073497  | 0.07336192  | 0          |
| 0.9277351    | 0.1016810   | 0          | 0.4540473   | 0.3801481   | 0.1229891   | 7.9130840  |
| 0.4848266    | 0.5839682   | 0          | 0.7877481   | 0.06049374  | 0.1072347   | 0.5420631  |
| 0.1672652    | 0           | 0.05268195 | 1.1657880   | 0.4016134   | 0.1069591   | 0          |
| 1.8288680    | 0.05230306  | 0.05057148 | 0.07497879  | 0.06908216  | 0.3676158   |            |
| 0.7965009    | 0           | 1.6698990  | 0.009847818 | 0           | 0.2850375   | 0          |
| 0.08968642   | 0.6818453   | 0          | 0           | 0.1887684   | 0           | 0          |
| 0.07087508   | 0           | 0.03688317 | 2.4022260   | 0.3499446   | 0           | 0.6615007  |
| 0.2169927    | 0.08872014  | 0.1452375  | 0           | 0.05698984  | 0.3908065   | 0.05378302 |
| 0.3676158    | 0.07723645  | 0.0652106  | 0           | 0.08496009  | 0           | 0          |
| 0.7445289    | 0           | 0.1577973  | 0.05846973  | 0           | 0           | 0          |
| 0.05584814   | 0.07892731  | 0.5086427  | 0.03807972  | 1.2079580   | 2.067198    |            |
| 0.0497813    | 0           | 0.1420785  | 0           | 0.5713742   | 0.1828035   | 0.09375851 |
| 0.1858502    | 0           | 0.08119669 | 0           | 0.4155657   | 0           | 1.49482    |
| 0.5755361    | 0           | 0.06470607 | 0           | 0           | 0.1066690   | 0.06433276 |
| 0.06049374   | 0           | 3.4950930  | 0.8897395   | 0.6915356   | 0.05343935  | 0.3565155  |
| 0.4344550    | 0.1585779   | 0.2522378  | 0.06335802  | 0.1255273   | 0           | 0.09635091 |
| 0.49256      | 0.1131809   | 0.04934076 | 0.1201186   | 0.1781312   | 0           | 1.0219260  |
| 0.1531421    | 0           | 0.1427076  | 0           | 0.06071331  | 0.0424454   | 0.6358033  |
| 0.07352316   | 0.1201186   | 0.4085867  | 1.9343590   | 0.6495735   | 0.3379927   |            |
| 0.03129377   | 0.1275658   | 0.1050458  | 5.4973450   | 0.01951752  | 0.0612693   |            |
| 1.6895470    | 0.05099548  | 0.02128733 | 0.2199121   | 0           | 0.05909881  | 0.1177924  |
| 0.4414161    | 0.4416242   | 0.06704015 | 0.09640644  | 3.2546570   | 0.1808272   | 0          |
| 0.2437380    | 0.1321384   | 0.3625254  | 0           | 0.1747808   | 0.4578561   | 1.3938770  |
| 0.2958264    | 0.1781786   | 0.04820322 | 0.2225257   | 0           | 0.3173912   | 0.02674104 |
| 0.1019910    | 0.2742052   | 0.03648096 | 0           | 0.04250703  | 0           | 0.08226999 |
| 0.2634097    | 0           | 0          | 0.2056539   | 0.0430541   | 0.05855257  | 0          |
| 0.08428227   | 0.1472981   | 0.02447186 | 0.1683172   | 0           | 0.1657386   | 0          |
| 0.3953464    | 0.6159907   | 0.5227037  | 11.257280   | 0.02320442  | 1.3170490   | 0          |
| 0.05802782   | 0.04484321  | 0.02243664 | 0.2063474   | 0.03286153  |             |            |
| TCGA-CU-A3QU | 158         | 0          | 0.1259428   | 0.03673114  | 0.04152216  | 0.1800377  |
| 33.367860    | 0.1581077   | 0.1462628  | 0.2364344   | 0.03394111  | 0.01596827  |            |
| 0.09207088   | 0.7427853   | 0.1361180  | 0.03044474  | 0.05420756  | 0.005370548 |            |
| 0.1496329    | 0.05457198  | 0.0187907  | 0.1882338   | 1.65585825  | 0.553280    | 0.1950328  |
| 0            | 0           | 0.04110168 | 0           | 0.7123593   | 0.07586526  | 0.02863345 |
| 0.2426781    | 0.08691692  | 0.09765513 | 0.3967861   | 0.1628168   | 0.101417    |            |
| 0.0212990    | 0.07127507  | 0.1691163  | 0.08871675  | 0           | 6.8098870   | 0.1452811  |
| 0.02156064   | 0.02132465  | 0.09224526 | 1.0146982   | 0.8596030   | 0.1218399   | 0.8529344  |
| 0.02024335   | 0           | 0.4672601  | 0           | 0.001020438 | 4.5097680   | 0.07712668 |
| 0.2301047    | 0           | 0          | 0.1679395   | 0.03432382  | 0.3985720   | 0.03698215 |
| 0.1043076    | 0.04851749  | 0.2346849  | 0.3568168   | 4.67376     | 0.06494066  |            |
| 0.03562296   | 0.004779266 | 0.1822713  | 0           | 0.02589341  | 0.5937626   | 0.3482073  |
| 0.1654539    | 0.4553552   | 0.06662859 | 0.07567913  | 0           | 0.02957225  | 0.1665145  |



|              |            |            |             |             |             |            |            |
|--------------|------------|------------|-------------|-------------|-------------|------------|------------|
| 0            | 0.03439654 | 0.0398409  | 0.1610987   | 0           | 0.2790103   | 0.02951848 |            |
| 0.04586205   | 0.4142001  | 1.5445350  | 0           | 0.03529384  | 0.02765786  | 1.327642   |            |
| 0.2349140    | 0.05946947 | 0.2061608  | 0.25318     | 0.1553604   | 0.7731031   | 0.0452233  |            |
| 0            | 0.05777639 | 2.0858530  | 0.07586526  | 0.2680334   | 0.01216117  | 0.07712668 |            |
| 0.3031462    | 0.2762126  | 0.04133715 | 0.5206613   | 0           | 0.08131135  | 0.06776929 |            |
| 2.2691250    | 0.01848055 | 0.5144526  | 0.1106943   | 1.5282270   | 0.02888819  |            |            |
| 0.4826671    | 0.1352931  | 1.6906040  | 0.4435838   | 0.1213391   | 0           | 0.1983354  |            |
| 0.1970287    | 0.8986254  | 0.3226865  | 0           | 0.3252036   | 0           | 0          | 0.2423159  |
| 0.5966502    | 0.09799899 | 0.02589341 | 0.7964271   | 0.2530156   | 0.1248859   |            |            |
| 0.2855431    | 0.2055084  | 0.06046617 | 0.2907791   | 0.1164728   | 4.803428    |            |            |
| 0.07780431   | 0.6055746  | 0.4744042  | 0.1806882   | 0.005100586 | 0.5227231   |            |            |
| 0.3045997    | 0          | 0.07481643 | 0.1195227   | 0.4472714   | 0.4070764   | 0.1457376  |            |
| 0.02881641   | 0.1057666  | 0.1458685  | 0           | 0.06606375  | 0.8999537   | 0.4501752  |            |
| 0.2489208    | 0.1767895  | 0.1265384  | 0.5364251   | 0.1784084   | 0           | 0.1239326  |            |
| 0.1104433    | 0.2311056  | 0.1970287  | 0.4280835   | 0.01518725  | 0.3629163   |            |            |
| 0.8313660    | 0.01264421 | 0.1420814  | 0.2378779   | 0.6559663   | 0.1237436   |            |            |
| 0.1601305    | 0.2262592  | 0.08137928 | 0.1101968   | 0           | 1.5913830   | 0.1071628  | 0          |
| 0            | 0.05306979 | 0.4972934  | 0.3882322   | 1.7151910   | 0.08550449  | 0.6646546  |            |
| 0.1714665    | 0          | 0.1051284  | 0.03074842  | 0.1700017   | 0           | 0.02871363 |            |
| 0.2540122    | 0.07018083 | 0.1079944  | 0           | 0           | 0.4542213   | 0.5073489  | 0          |
| 0.01770465   | 0          | 0.4951003  | 0           | 0.07486243  | 0.1292903   | 0.1917539  | 0          |
| 0.05706561   | 1.4305580  | 0.04178936 | 0.03788837  | 0.04329377  | 0.1087783   |            |            |
| 0.02726881   | 0.2594661  | 0.1187649  | 0.1021080   | 0.1982316   | 0.2243713   | 0          |            |
| 0.04692244   | 2.1023660  | 0.02299599 | 4.3441752   | 4.4657340   | 0.05630693  | 0.05478684 |            |
| 0.04817557   | 0          | 0          | 0.04352591  | 0.2395531   | 0.004005716 | 0.0956886  |            |
| TCGA-GD-A3OP | 64         | 0          | 0.2783975   | 0.1653962   | 0           | 0.2765882  | 0.04747087 |
| 25.578650    | 0.2514673  | 0.2997648  | 0.1505382   | 0.3548793   | 0.2445329   |            |            |
| 1.5140790    | 0.4422239  | 0.5160362  | 0.2061654   | 0.06945856  | 0.1464544   |            |            |
| 0.004836595  | 1.5047750  | 0.0552896  | 0.1015349   | 0.2966585   | 1.710252    | 33.84057   |            |
| 0.1376655    | 0.08867947 | 0.2373543  | 0.1480610   | 0.2610898   | 0.9100843   |            |            |
| 0.1024838    | 0.07735993 | 0.1993776  | 0.9179120   | 0.2307065   | 0.2308583   |            |            |
| 0.5062270    | 0.2408908  | 0.2207235  | 0.009590703 | 0.1283775   | 0.1923819   |            |            |
| 0.1331605    | 0.1431096  | 9.9695550  | 0.2289646   | 0.0582511   | 0.1024240   | 0.8722772  |            |
| 1.2900916    | 0.0731480  | 0.1371579  | 1.5627550   | 0.3463834   | 0           | 0.3748981  | 0          |
| 0.1792018    | 0.3722947  | 0.03655257 | 0.1736464   | 0.2072272   | 0.2215307   |            |            |
| 0.1085904    | 0.1512425  | 0.1236450  | 0.5503824   | 0.6994113   | 0.0320035   |            |            |
| 0.2431312    | 0.1146961  | 0.3245762  | 1.1246942   | 2.2469540   | 0.1364629   | 0.1684265  |            |
| 0.2496378    | 0.2579492  | 0.1698803  | 0.09327609  | 0.3972275   | 0.3135877   |            |            |
| 0.3725102    | 0          | 0.1600112  | 0.2152261   | 0.06556514  | 0.1597926   | 0.4123879  |            |
| 0.05112247   | 0          | 0.1076395  | 0.06448082  | 0.06943357  | 0.2986113   | 0.1329184  |            |
| 0.2891164    | 0.4684946  | 1.40678    | 0.0557407   | 0.1057961   | 0.1271394   |            |            |
| 0.3487127    | 2.2546440  | 0.6581813  | 0.1606706   | 0.3249117   | 0.1805065   |            |            |
| 0.1399141    | 0.6776730  | 0.1629084  | 0           | 0           | 2.36658     | 0.03416128 | 0.2758684  |
| 0.04380832   | 0.03472928 | 0.1213363  | 0.4422239   | 0.5258358   | 0.5967766   |            |            |

|              |              |             |             |             |              |
|--------------|--------------|-------------|-------------|-------------|--------------|
| 0.2249389    | 0.04881812   | 0.1406378   | 1.5903570   | 0.02496476  | 0.4202064    |
| 0.06645921   | 1.0686460    | 0.02175748  | 0.9105622   | 0.2145170   | 0.04061396   |
| 0.4793779    | 0.2731881    | 0           | 0.1530998   | 0.2129276   | 0.5664974    |
| 0.02252855   | 0            | 0.4402030   | 0.2805741   | 0.5656103   | 0.02941857   |
| 0.3514498    | 0.5696504    | 0.1687042   | 0.1102087   | 0.1057579   | 0            |
| 1.1794040    | 0.2077924    | 0.2569190   | 0.5193970   | 0.9494173   | 0.6237742    |
| 0.7753575    | 1.1246940    | 0.1454829   | 0.3705790   | 0.2511587   | 0.3957359    |
| 0.0524992    | 0.1505182    | 0.1714518   | 0.5386003   | 0           | 0.2900407    |
| 0.4054177    | 0.1743564    | 0.5307088   | 0.09805655  | 0.5856961   | 0.1606706    |
| 0.1312480    | 0.1116109    | 0.5470452   | 0.4162570   | 0.2839034   | 0.8791352    |
| 0.4191169    | 0.6286335    | 1.2298060   | 0.1023642   | 0           | 0.9230446    |
| 0.03721547   | 0.2806561    | 0.2198651   | 0.1128354   | 0.02574124  | 0.4823147    |
| 0.09650843   | 0.1172026    | 0.08427105  | 0.6980361   | 0.6059164   | 0.5403423    |
| 1.01202      | 0.1636323    | 0.5897705   | 0.02438192  | 0.2750036   | 3.7999610    |
| 0.2041330    | 0.1539055    | 0.08404127  | 0.2968983   | 0.06320329  | 0            |
| 0.1109755    | 0.53178      | 0.4680512   | 0.1597926   | 0.1913330   | 0.07931841   |
| 0.05667065   | 0.1528174    | 0.2661393   | 0.2878155   | 0           | 0            |
| 0.06824283   | 0            | 0.1061269   | 0.1074398   | 0.4268043   | 0.5775680    |
| 0.03570458   | 0.3393146    | 0.2362464   | 0.1056433   | 0.6323401   | 0.06212901   |
| 1.3136087    | 0.6631950    | 0.08451461  | 0.1809126   | 0           | 0.04554837   |
| 0.03919846   | 0.6079837    | 0.03246712  | 0.03590625  |             |              |
| TCGA-KQ-A41P | 1094         | 0           | 0.137130477 | 0.081469338 | 0.110514928  |
| 0.023382758  | 52.015430094 |             | 0.212340722 | 0.088593207 | 0.389291324  |
| 0.03011243   | 0.783232045  | 0.449267208 | 2.089960087 | 0.074104808 | 0.099938709  |
| 0.10820869   | 0.221559948  | 0.630580186 | 0.018156024 | 0.075019682 | 0.062625126  |
| 10.005748614 | 59.116583911 |             | 0.119252066 | 0.0819017   | 0.561186194  |
| 0.164093685  | 0.482269385  | 1.741681437 | 0.201922135 | 0.114315706 | 0.065471723  |
| 0.968864057  | 0.219161472  | 0.146203772 | 0.572044175 | 0.216675758 | 0.213694795  |
| 0.035430745  | 0.075881977  | 0.130297343 | 0.314836699 | 0.140983155 | 14.666461875 |
| 0.096669658  | 0.286927868  | 0.009459575 | 1.841392199 | 0.158865209 | 9.051896387  |
| 0.162143853  | 0.821954778  | 0.148168549 | 0           | 1.537609059 | 0.039069925  |
| 2.300603586  | 0            | 0           | 0.510370121 | 0.196415168 | 0.063746504  |
| 0.593813298  | 0.424333914  | 0.295293874 | 0.013511988 | 0.212300597 | 0.056495958  |
| 0.145004486  | 0.712274785  | 3.507413712 | 0.086422674 | 0.142220527 | 0.050881763  |
| 0.294543997  | 0.083678034  | 0.068917603 | 0.225764561 | 0.057924044 | 0.247708301  |
| 0.116535429  | 0.118225272  | 0.12721689  | 0.581318434 | 0           | 0.2215966    |
| 0            | 0.079530068  | 0.023821024 | 0.059074356 | 0.322874249 | 0.196415168  |
| 0.446221854  | 2.452535339  | 0.150412411 | 0           | 0.046968844 | 0.147227724  |
| 1.354696254  | 0.039570821  | 0.031177011 | 0.842326256 | 0.103376404 | 0.480125966  |
| 0.210640222  | 0.134475115  | 0.26910975  | 3.518980903 | 0.050480534 | 0.458610887  |
| 0            | 0.493075421  | 0.081684947 | 0.364449532 | 0.188970861 | 0.083098725  |
| 0.180374002  | 1.08660087   | 0.049187635 | 0.748317183 | 0.049103792 | 1.373383577  |
| 0.064302585  | 0.2306655    | 0.233574794 | 0.120031491 | 0.928508066 | 0.472255048  |
| 0.141292675  | 0            | 0.339356049 | 0           | 0.119588571 | 0.993055569  |
|              |              |             |             | 0.085567004 |              |

|             |             |             |             |             |              |
|-------------|-------------|-------------|-------------|-------------|--------------|
| 0.133162826 | 0.037838299 | 0.046463803 | 0.829215421 | 3.385027361 | 0.04347217   |
| 0.068917603 | 0.174880319 | 0           | 0.207746812 | 0           | 0.664188723  |
| 0.040234019 | 1.031912524 | 0.937568815 | 0.167485802 | 0.069027695 | 0.307007722  |
| 1.192520662 | 0.280535267 | 0.549814372 | 0.040919827 | 0.72964734  | 0            |
| 0.074673969 | 0.053020045 | 1.221780189 | 0.223067374 | 0.271525456 | 0.084367182  |
| 0.014075354 | 0.271769415 | 0           | 0.120886243 | 0.287436831 | 0.2150582    |
| 0.257648517 | 0.392117395 | 0.148815552 | 1.244537043 | 0           | 0.349104158  |
| 0           | 0.440932009 | 0.1537770   | 0.262204714 | 0.409964631 | 0.060633307  |
| 0.539786589 | 0.511438529 | 0.538459027 | 0.189081113 | 0.197854107 | 0.381918382  |
| 0.329354702 | 0.116861713 | 0.460178582 | 0.10829909  | 0.086382496 | 0            |
| 0.488723886 | 0.142611673 | 0.129893798 | 0.249056697 | 0.32338807  | 0.077858265  |
| 1.127252268 | 0.629673398 | 0.455155623 | 0.585343215 | 0.036029464 | 0.203188105  |
| 0.473766682 | 0.12275948  | 0.263943594 | 0.056857022 | 0.121004481 | 0.215768993  |
| 0.031132087 | 0.143718415 | 0.049440889 | 0.163989893 | 0.544027623 | 0.712817677  |
| 0           | 0           | 0.219625601 | 0.083742901 | 0.126193575 | 0.049159655  |
| 0           | 0           | 0.465148398 | 0.885478216 | 0           | 0.088237853  |
| 1.26753255  | 0.132698131 | 0.054433765 | 0.20083547  | 0.537375807 | 0            |
| 0.052761095 | 0.478874008 | 0.193946755 | 0.031222064 | 0.92355133  | 0.275426369  |
| 1.139361423 | 3.19130779  | 0.104906136 | 0.243033391 | 0.064111776 | 0            |
| 0.084323945 | 0.028962022 | 1.405600162 | 0.490432149 | 0.07428275  | TCGA-UY-A9PH |
| 1561        | 0           | 0.07637652  | 0.1633513   | 0.09232899  | 0.3532352    |
| 0.1172098   | 41.363630   | 0.3885768   | 0.09292312  | 0.1752458   | 0.02515724   |
| 0.5275349   | 0.3412158   | 1.3685210   | 0.01375786  | 0.15796     | 0.1808045    |
| 0.07165194  | 0.2218165   | 0.2275250   | 0.04178314  | 0           | 4.96491624   |
| 9.45330     | 0.1640938   | 0           | 0.2344197   | 0.2741820   | 2.7259660    |
| 0.1686945   | 0.3183477   | 0.05469793  | 0.8094312   | 0.2034412   | 0.1357167    |
| 0.1470494   | 0.07758016  | 0.1409447   | 0.1420819   | 0.09509266  | 0.1385441    |
| 0.1972712   | 0.1177835   | 24.57915    | 0.08076204  | 0.1917696   | 0            |
| 1.1281450   | 0.4645302   | 3.69211     | 0.06773102  | 0.7193967   | 0.3150928    |
| 0           | 0.8689844   | 0           | 0.04084295  | 4.3454470   | 0            |
| 0.3979597   | 0.05469793  | 0           | 0.2036899   | 0.1526454   | 0.2363381    |
| 0.397974    | 0.04515401  | 0.1637217   | 0.06742741  | 0.2050113   | 0.2644735    |
| 4.922814    | 0.3850734   | 0.05940861  | 0.02125442  | 0.1447499   | 0.02796331   |
| 0           | 0.8298996   | 0.09678454  | 0.5058687   | 0           | 0.04938527   |
| 0.1151394   | 0.8094312   | 0.06575707  | 0.1851315   | 0           | 0            |
| 0.05906034  | 0.03980224  | 0.07792625  | 0.4225977   | 0           | 0.1019792    |
| 0.4111689   | 1.1708310   | 0.01795158  | 0.05224404  | 0           | 0.06150023   |
| 2.5304180   | 0.8125544   | 0.1983551   | 0.08334923  | 0.7271733   | 0.3454606    |
| 0.2292104   | 0           | 0           | 0.2569444   | 6.746390    | 0.08434727   |
| 0.1702860   | 0.08574972  | 0.8238734   | 0.2047295   | 0.2412837   | 0.8419973    |
| 0.1388486   | 0.06026817  | 0.1375886   | 2.4489320   | 0.06164024  | 0.5054621    |
| 0.1640938   | 1.6950910   | 0.3223271   | 0.0642360   | 0.2787694   | 0            |
| 1.6309930   | 0.4931781   | 0.07419786  | 0           | 0.3780171   | 0.3504916    |
| 0.5328507   | 2.8925350   | 0.0714864   | 0.05562501  | 0.1264471   | 0            |
| 0.1539473   | 1.2568890   | 0.07263709  | 0           | 0.3541882   | 0            |
| 0.2776972   | 0           | 0.06528143  | 0           | 2.1552620   | 0.4105934    |
| 0.7929080   | 0.05766874  | 0.3206095   | 0.7032591   | 0.3571373   | 0.0567085    |
| 0.06837241  | 0.7450412   | 0.08980257  | 0           | 0           | 1.1166940    |
| 0.2129831   | 0           | 0.1025222   | 0           | 0.9406275   | 0.07730328   |
| 0.05508744  | 0.6403660   | 0.25667     | 0.1230005   | 0.06551839  | 0.1046964    |
| 1.2878      |             |             |             |             |              |

|              |            |            |            |            |            |            |
|--------------|------------|------------|------------|------------|------------|------------|
| 0.1586841    | 0.06481263 | 0.3306928  | 1.1051210  | 0.3854160  | 0.2628687  | 0.6761085  |
| 0            | 0.5459004  | 0.3487984  | 0.2530418  | 0.06318664 | 0.2644735  | 0.2431019  |
| 0.05503145   | 0.1378325  | 0.2847802  | 0.1809556  | 0.1174823  | 0          | 0.8166025  |
| 0.1191440    | 0.2080728  | 0.3447028  | 0.06504619 | 0.3139186  | 1.512413   |            |
| 0.3089587    | 0.5868255  | 0.3210729  | 0.4149498  | 0.3347079  | 0.1367448  |            |
| 0.2520114    | 0          | 0.03192392 | 0.3485081  | 0.2080728  | 0          | 0.08261015 |
| 0.06850215   | 0.3751465  | 0.8097485  | 0.09863561 | 0.07873639 | 0          | 0.2293560  |
| 0.04439057   | 0.1642805  | 0          | 0.05602788 | 0          | 0.5918137  | 0          |
| 0.7701468    | 0.1209401  | 0.06063512 | 0.2296029  | 0.1848606  | 0.1362288  | 0          |
| 0.3859520    | 0.1043371  | 0.4538677  | 0.05113404 | 1.3396726  | 0.3858770  | 0.08346967 |
| 0.4060814    | 0.1071235  | 0          | 0.04696526 | 0.04839227 | 0.5084596  | 0.1425142  |
| 0.1773116    |            |            |            |            |            |            |
| TCGA-FD-A5BY | 251        | 0          | 0.10217286 | 0.04682648 | 0          | 0.10800941 |
| 0.13439807   |            |            |            |            |            |            |
| 23.68701584  | 0          | 0.12730273 | 0.37292438 | 0          | 0.05769283 | 0.61652778 |
| 0.19562668   | 0.51405066 | 0.12620307 | 0.14748672 | 0.10365928 | 0          | 0.12717237 |
| 0.10435615   | 0.07186563 | 0.95987492 | 2.32865272 | 24.9268261 | 0.30239566 |            |
| 0.10984164   | 0.80638842 | 0          | 0.46199337 | 0.40127424 | 0.53194003 | 0.1825159  |
| 0            | 0.3403144  | 0.29742532 | 0.10893317 | 0.33722693 | 0.05189152 | 0.12390369 |
| 0.1018234    | 0.13381877 | 0.05673603 | 0.18850003 | 0.27011162 | 1.95020179 | 0          |
| 0.02748646   | 0.04530933 | 0.29399578 | 1.67404656 | 2.77903379 | 0.23299028 |            |
| 0.37495114   | 0.12903555 | 0          | 0.16245921 | 0          | 0.12228451 | 1.53313355 |
| 0            |            |            |            |            |            |            |
| 0.14748672   | 0.03259418 | 0.03135955 | 0.14529595 | 0.09342397 | 0.30630258 |            |
| 0.16937236   | 0.42431828 | 0.03883171 | 0.0782211  | 0.06958376 | 0.19233426 |            |
| 0.41697863   | 0.3135955  | 0.0275964  | 0.06812058 | 0.18278454 | 0.13278141 |            |
| 0.06412797   | 0.03301005 | 0.51905462 | 0.11097749 | 0.2900259  | 0          | 0.02831368 |
| 0.14725755   | 0.09281302 | 0.07540001 | 0.05307001 | 0.14473638 | 0          | 0.10158185 |
| 0            | 0.04765532 | 0.19588979 | 0          | 0.11693391 | 0.69148165 | 0.60413749 |
| 0.2058409    | 0          | 0          | 0.28207568 | 0.6286564  | 0.26620325 | 0.0758143  |
| 0.1254382    | 0.12103686 | 0.23107037 | 0.39423434 | 0.02882633 | 0.04294046 |            |
| 0.03682794   | 4.60638001 | 0          | 0.39051515 | 0.0155036  | 0          | 0.30058324 |
| 0.19562668   | 0.79706354 | 0.42239394 | 0          | 0.06910619 | 0.06010106 | 1.40402757 |
| 0.02355982   | 1.08290973 | 0.09407865 | 0.78846868 | 0.06159912 | 0.51559117 |            |
| 0.13585102   | 0          | 1.61929312 | 0.05655001 | 0.2552358  | 0.03832834 | 0.28896758 |
| 0.15070852   | 0.42005596 | 0.38566403 | 0          | 0.03189107 | 0          | 0          |
| 0.30891497   |            |            |            |            |            |            |
| 0.40033468   | 0          | 0.09903016 | 0.33505568 | 0          | 0.6766426  | 0.15600982 |
| 0            |            |            |            |            |            |            |
| 0.03854246   | 0.43248096 | 0.45269691 | 0.0802221  | 0.09918835 | 0.29410022 |            |
| 0.26879614   | 0.3113980  | 0.31862012 | 0.23519662 | 0.23299028 | 0          | 0.05961205 |
| 0.02539546   | 0.29010236 | 0.15263498 | 0.07431707 | 0.22776585 | 0.21573736 |            |
| 0.52068687   | 0          | 0.16844194 | 1.05551656 | 0.19865879 | 0.07051892 | 0.18781582 |
| 0.14631046   | 0.68385825 | 0.4093972  | 0.07431707 | 0.09479681 | 0.91518686 |            |
| 0.14731176   | 0.15070852 | 1.14758333 | 0          | 0.1959508  | 0.31495896 | 0.64477579 |
| 0.12075439   | 0.30325718 | 0.15679775 | 0.1893046  | 0.05268165 | 0.13605905 |            |
| 0.15561882   | 0.12893717 | 0          | 0.23408825 | 0.27323172 | 0.04147756 | 0.17893922 |
| 0.39347131   | 0.44750925 | 0.40494723 | 0.30160004 | 0.16350733 | 1.20869258 |            |

|              |            |             |            |             |            |            |            |
|--------------|------------|-------------|------------|-------------|------------|------------|------------|
| 0.09203915   | 0          | 0.31982587  | 0.11759831 | 0.0722419   | 0          | 0.1830270  | 0.18602769 |
| 0.0298232    | 0.09178405 | 0.0947245   | 0.35346438 | 0.12408455  | 0.57467468 |            |            |
| 0.11310002   | 0.09028267 | 0.07485462  | 0.05259797 | 0           | 0.15906319 | 0.07063926 |            |
| 0            | 0.0214147  | 0           | 0.97548764 | 0.05327491  | 0.02415088 | 1.15904896 |            |
| 0.15023168   | 0.04779978 | 0.13501176  | 0.4239389  | 0.02603434  | 0          | 0.14571765 |            |
| 1.96940225   | 0.0598188  | 1.4832113   | 0.02931629 | 3.2743782   | 6.7499388  |            |            |
| 0.03828403   | 0.18625244 | 0.06141633  | 0.19343274 | 0.05385248  | 0          | 0.38868175 |            |
| 0.0408533    | 0.1321537  |             |            |             |            |            |            |
| TCGA-K4-A3WU | 105        | 0           | 0.1251878  | 0.1784980   | 0.03783381 | 0.2508927  | 0.4963026  |
| 33.4904      | 0.2544254  | 0.4321897   | 0.6663523  | 0.2154323   | 0.3092618  | 4.57904    |            |
| 0.4753901    | 0.9088523  | 0.2875168   | 0.09986537 | 0.2469620   | 0.08318933 |            |            |
| 0.7726002    | 0.04972444 | 0.05136466  | 0.04287832 | 5.72154     | 63.498770  | 100.8615   |            |
| 0.1794453    | 0.5763515  | 0.2996055   | 9.1135571  | 9.774340    | 48.38839   | 0.2087199  |            |
| 0.2017230    | 9.950462   | 0.4001493   | 0.2335741  | 4.160330    | 19.60393   | 0.604504   |            |
| 0.1407011    | 0.1369724  | 0.1378735   | 0.2155631  | 0.5067756   | 9.862014   |            |            |
| 0.3971281    | 0.1768090  | 4.728067    | 0.8405125  | 0.5982472   | 5.4235180  | 138.7713   |            |
| 0.5359790    | 5.072420   | 0.05561286  | 1.2385570  | 1.605029    | 0.8144995  | 1.232752   |            |
| 0.03698255   | 0.1405513  | 0.8153634   | 0.5379280  | 0.006020153 | 0.2643101  |            |            |
| 0.09382466   | 0.7505461  | 1.7522480   | 0.01850284 | 0.2348099   | 0.9007331  |            |            |
| 0.2214753    | 1.5172333  | 8.103240    | 2.958604   | 0.1379492   | 1.7201190  | 260.9835   |            |
| 0.5041773    | 0.07078    | 0.3246117   | 0.03965957 | 0.3203584   | 0.07978976 |            |            |
| 0.08094676   | 0.4355158  | 0           | 0.05389079 | 0.5689623   | 0.05172385 | 0.06268229 |            |
| 0.03025158   | 0.1794082  | 0.7557235   | 0.3831816  | 0.8606849   | 0.6268229  |            |            |
| 2.7204780    | 9.115699   | 0.007356052 | 0.02140813 | 0.03215874  | 10.937264  | 6.3146     |            |
| 1.2129330    | 3.793082   | 0.2561562   | 0.2691388  | 0.21234     | 1.0237710  | 26.78402   |            |
| 0.2455273    | 0.0263221  | 4.0779950   | 1.382525   | 0.6280056   | 0.05540457 |            |            |
| 0.03513782   | 0.4603637  | 0.5033542   | 0.9934206  | 1.03508     | 0.2844812  |            |            |
| 0.1234810    | 4.322462   | 1.5744620   | 1.431311   | 1.8968210   | 4.370665   | 1.805306   |            |
| 0.04402685   | 14.950950  | 3.712534    | 0          | 1.1655111   | 0.0912880  | 3.814344   | 0.3835228  |
| 0.1290840    | 3.590539   | 0.6004547   | 2.1500420  | 0.02929311  | 0.02279356 | 0.5699588  |            |
| 0.2226906    | 0.2207914  | 0.9442354   | 0          | 0.02359333  | 0.4499226  | 0.1536937  |            |
| 0.6543067    | 0.03716839 | 0.2140039   | 0          | 1.1039571   | 9.724030   | 4.204735   |            |
| 0.2126792    | 0.5517823  | 1.4408790   | 4.878164   | 2.199380    | 6.7241     | 1.1379250  |            |
| 0.3749383    | 0.2359623  | 0.4861892   | 0.1963675  | 0.07967516  | 0.2835723  |            |            |
| 0.009637147  | 1.1430370  | 0.06335341  | 0.3762213  | 0.8200122   | 0.3102695  |            |            |
| 0.2268095    | 0.4832566  | 0.1233422   | 1.5485090  | 0.6827548   | 0.1062335  |            |            |
| 0.4516953    | 1.6101250  | 4.737978    | 0.07181078 | 1.4034780   | 0.0968673  | 0.7547261  |            |
| 1.0219330    | 9.677677   | 0.1898754   | 0.1625607  | 0.3486571   | 0.2480537  |            |            |
| 0.1035464    | 0.3656440  | 2.224514    | 0.1430473  | 0           | 2.9139880  | 1.464656   |            |
| 0.05929066   | 0.2131559  | 2.1009270   | 3.465032   | 1.6400962   | 0.0209040  | 1.460799   |            |
| 0.7837362    | 0.2549103  | 0.3709848   | 4.6392830  | 2.241367    | 0.2065343  | 0          |            |
| 0.1395362    | 0.4727463  | 0.1278936   | 0          | 0.06770261  | 0.2526322  | 0.4138735  |            |
| 0.5911410    | 4.850171   | 0.1774517   | 0.7757642  | 0.3195443   | 0.05733729 |            |            |
| 0.1182350    | 1.1514644  | 0.2329610   | 0.1819882  | 0.0310090   | 0.0345228  | 0.1183442  |            |

|              |            |             |            |            |            |
|--------------|------------|-------------|------------|------------|------------|
| 0.2064911    | 0.1397619  | 0.3859888   | 0.8116142  | 0.2046833  | 0.1083738  |
| 0.5708911    | 1.9653210  | 0.0427544   | 1.3948660  | 0.3352526  | 1.3868462  |
| 1.4009800    | 0.7866809  | 0.08320034  | 0.08779241 | 0.6451785  | 0.7441416  |
| 0            | 0.9127820  | 0.02189936  | 0.1089859  |            |            |
| TCGA-FD-A3SJ | 739        | 1           | 0.1877991  | 0.1479792  | 0.0716918  |
|              | 0.2742807  |             |            |            |            |
| 1.1831472    | 7.000460   | 0.03443672  | 0.2442519  | 0.1262680  | 0.1360752  |
| 0.02930121   | 2.4124330  | 0.4769063   | 1.4290560  | 0.2136547  | 0.6027524  |
| 0.1403914    | 0.2457276  | 0.3660026   | 0.05888969 | 0.04866578 | 0.0812507  |
| 10.7971598   | 9.24690    | 0.0546068   | 0.04250416 | 0.3185397  | 0.1419316  |
| 6.7575921    | 0.0011250  | 0.4584590   | 0.08494392 | 0.4399562  | 1.35063    |
| 0.08430524   | 0.4567249  | 0.1706789   | 0.2225301  | 0.0551620  | 0.2058507  |
| 0.06915664   | 0.2042367  | 0.02286419  | 7.9947970  | 0.1567757  | 0.09306604 |
| 0.1165933    | 0.4379921  | 0.2576424   | 3.0009790  | 0.1314798  | 0.8125070  |
| 0.1747599    | 0          | 0.4693918   | 0.5068986  | 0.4290175  | 2.2386260  |
| 0.1331662    | 0.4414408  | 0.3610116   | 0.9111875  | 0.1845218  | 0.7704216  |
| 0.1605732    | 0.8939428  | 0.00438266  | 0.2171752  | 1.3036690  | 0.6222789  |
| 1.2834930    | 0.9101134  | 0.3924409   | 0.2383369  | 0.6766507  | 0.0786770  |
| 0.2931256    | 0          | 1.17164     | 0.2630301  | 0.6606148  | 0.7710928  |
| 0.1150403    | 0.09971949 | 0.06285088  | 0.2042367  | 0.6109428  | 0          |
| 0            | 0.2522261  | 0.04635859  | 0.4800327  | 0.5410811  | 0.5861130  |
| 0.47511      | 3.024506   | 1.0151950   | 0.06969541 | 0.04056656 | 0          |
| 4.2262130    | 0.4584590  | 0.7210673   | 0.6417466  | 0.2548317  | 0.2732114  |
| 0.2682439    | 0.9788775  | 0.2342465   | 0.1453916  | 0.1246952  | 2.3395020  |
| 0.06549414   | 0.6611201  | 0.006999124 | 0.09987467 | 0.5234096  | 0.3709271  |
| 0.8810025    | 0.4494846  | 0           | 0.0935943  | 0.1424468  | 1.7458210  |
| 0.06381671   | 1.1051470  | 0.3503936   | 0.7543358  | 0.1459974  | 7.332081   |
| 0.09199524   | 0.1167979  | 1.0424940   | 0.3446495  | 0.1859339  | 0.05191017 |
| 0.1467617    | 0.3061692  | 0.2327338   | 0.6529074  | 0.2497856  | 0.1295755  |
| 0.02454596   | 0.2109897  | 0.2988432   | 0.1897683  | 0.0282007  | 0.06706099 |
| 0.3781536    | 0.03640454 | 0.6468806   | 0          | 0.1267246  | 0          |
| 1.0877891    | 1.243392   | 0.1991902   | 0.2686724  | 0.2987370  | 0.7735964  |
| 0.3148632    | 2.7388610  | 0.5308995   | 0.6836949  | 0.1045951  | 0.2099132  |
| 0.1547751    | 0.3183857  | 0.1653775   | 0.1006517  | 0.08955748 | 0.1187001  |
| 0.3274119    | 0          | 0.2851627   | 0.3729245  | 0.1494747  | 0.09550764 |
| 0.8902924    | 0.2565871  | 0.03696460  | 0.2013034  | 0.08559234 | 1.0487970  |
| 0.1995124    | 0.2041128  | 1.1432260   | 0.03933324 | 0.5952776  | 0.3994826  |
| 1.3972080    | 0.04906329 | 0.2310288   | 0.2123598  | 0.1281928  | 0.1426993  |
| 0.1474178    | 0.1053815  | 0.1159834   | 0          | 0.3302485  | 0.09251317 |
| 0.05617533   | 0.0807824  | 1.4672830   | 0.3282968  | 0.2132831  | 0.2297663  |
| 0.09226956   | 1.0632050  | 0.1168628   | 0.02929101 | 3.8262260  | 0.02654497 |
| 0.3179838    | 0          | 0.9254317   | 0.3452614  | 0.1211736  | 0.03107704 |
| 0.09621794   | 0.02659534 | 0.4481454   | 0.5707632  | 0.3829439  | 0.1681278  |
| 0.2281044    | 0.03561816 | 0.2172984   | 0.1637253  | 0.1753961  | 0.4966209  |
| 0            | 0.1908999  | 2.268942    | 0.07215313 | 0.0572405  | 0.3737532  |
| 0.1565131    | 0.06179523 | 0.1782825   | 0.3280935  | 1.1459410  | 0.05133973 |
| 0.3581599    | 0.1258146  | 0.1417778   | 0.5392027  | 0.01985233 | 1.5055987  |
| 0.7466420    | 0.09397841 | 0.1418917   | 0.332718   | 0.3929648  | 0.03646768 |
| 0.01878786   | 0.5922146  | 0.02766493  | 0.08260754 |            |            |

|              |             |            |            |            |             |             |             |           |
|--------------|-------------|------------|------------|------------|-------------|-------------|-------------|-----------|
| TCGA-FD-A3B5 | 272         | 1          | 0.1381192  | 0.05680851 | 0.2697169   | 0.1572406   |             |           |
|              | 0.01630478  | 35.994940  | 0.1389960  | 0.1551158  | 0.4388044   | 0.01049869  |             |           |
|              | 0.1587637   | 0.08543829 | 0.5711149  | 0.09186352 | 0.1374910   | 0.1760590   | 0.3638075   |           |
|              | 0.2777072   | 0.04431064 | 0.08718529 | 0          | 1.4117262   | 0.193930    | 0.1663088   |           |
|              | 0.7081640   | 0.3424004  | 0.03814081 | 0.06725722 | 0.7840271   | 0.1760002   |             |           |
|              | 0.02657075  | 0.09130678 | 0.3828333  | 0.03820529 | 0.1019478   | 0.06136708  |             |           |
|              | 0.2320278   | 0.05097684 | 0.3359994  | 0.1382939  | 0.1238949   | 0           | 1.523766    |           |
|              | 1.1448040   | 0.1348154  | 0.1400522  | 0.05276924 | 0.4280005   | 0.4708006   |             |           |
|              | 1.6939810   | 0.1130628  | 1.3646390  | 0.1033178  | 0.1132753   | 0.2128580   | 0.5176252   |           |
|              | 0.01325699  | 1.1159720  | 0.03766405 | 0.03578532 | 0.2372538   | 0           | 0.009196633 |           |
|              | 0.06800354  | 0.3185120  | 0.3452024  | 0.2402263  | 0.0188438   | 0.1537308   |             |           |
|              | 0.06753359  | 0.1866674  | 0.7450031  | 0.03260956 | 0.08034996  | 0.00826419  |             |           |
|              | 0.008869955 | 0.06040745 | 0.07001836 | 0.1201405  | 0.1731680   | 0.0403904   |             |           |
|              | 0.5373724   | 0.2112762  | 0.1442672  | 0.09979678 | 0           | 0           | 0.6953362   |           |
|              | 0.05267699  | 0          | 0.1170743  | 0.03322077 | 0.002168027 | 0.1313317   | 0           | 0         |
|              | 0.3271653   | 1.1075270  | 0.1248601  | 0.3270395  | 0.03275134  | 0.0513309   |             |           |
|              | 0.7392009   | 0.3148763  | 0.05518541 | 0.2043533  | 0.2447306   | 0.0480562   |             |           |
|              | 0.9565472   | 0.08393102 | 0          | 0.1608429  | 1.4174030   | 0.1760002   | 0.2131927   | 0         |
|              | 0.03578532  | 0.1562823  | 0.1708766  | 1.2035230  | 0.3074616   | 0           | 0.02515128  |           |
|              | 0.08476119  | 1.1365290  | 0.1543433  | 1.0547040  | 0.6373274   | 0.04483815  |             |           |
|              | 0.08042145  | 0.04653473 | 0.04184894 | 1.4194050  | 0.1234887   | 0.04785417  |             |           |
|              | 0.02789929  | 0.1051701  | 0.03656703 | 0.7505013  | 0.87025     | 0.4176607   |             |           |
|              | 0.02321359  | 0          | 0          | 0.09636856 | 0.6410901   | 0           | 0.0961124   | 0.6318913 |
|              | 0.03913148  | 0.4635575  | 0.3785331  | 0.05448686 | 0.02805515  | 0.134916    |             |           |
|              | 0.2029838   | 0          | 0.1203324  | 0.2943549  | 0.5380578   | 0.1366214   | 0.189326    |           |
|              | 0.1141335   | 0.2826570  | 0.1041402  | 0          | 0.1820399   | 0.1333241   | 0.08114336  |           |
|              | 0.2085762   | 0.08833261 | 0.09475231 | 0          | 0.1072831   | 0           | 0.2356513   |           |
|              | 0.1283272   | 0.4648194  | 0.0436922  | 0.5462388  | 0.1655562   | 0.05409558  |             |           |
|              | 0.04600189  | 0.0512436  | 0.08042145 | 0.1097011  | 0.3452692   | 0           | 0.3625257   |           |
|              | 0.1928690   | 0.2112003  | 0.04394871 | 0.3035198  | 0.2663114   | 0.39042     | 0.06231404  |           |
|              | 0.0911147   | 0.03775844 | 0.07144087 | 0          | 0.4685819   | 0.09944302  | 0.1509581   |           |
|              | 0           | 0.7218537  | 0.4343241  | 0.1637567  | 1.3172130   | 0.09918116  | 2.467097    |           |
|              | 0.1256166   | 0.0314851  | 0.04434325 | 0.2282669  | 0.1051701   | 0           | 0.1332258   |           |
|              | 0.3059263   | 0.04341677 | 0.1336197  | 0.0344751  | 0.08576253  | 0.4215001   |             |           |
|              | 0.7234253   | 0          | 0.2464387  | 0.02724343 | 0.09571549  | 0.2335755   | 0.1343077   |           |
|              | 0.06855799  | 0          | 0.01558781 | 0.8340369  | 0.4939547   | 0.07755788  | 0.1406359   |           |
|              | 0.5624497   | 0.2944146  | 0.1138699  | 0.2628867  | 0.2975652   | 0.1705542   |             |           |
|              | 0.03679028  | 0.2435641  | 1.4876280  | 0.1088556  | 1.5683090   | 0.0426788   | 0.7650509   |           |
|              | 1.5971890   | 0.05921746 | 0.08473351 | 0.0447051  | 0.04693339  | 0.006533226 | 0           |           |
|              | 0.06062623  | 0.1635547  | 0.07399616 |            |             |             |             |           |
| TCGA-GC-A6I3 | 0           | 0          | 0.07621279 | 0.04075028 | 0.1381966   | 0.2114868   |             |           |
|              | 0.2631568   | 97.108580  | 0.1991457  | 0.2492639  | 0.6954294   | 0           | 0.01882748  |           |
|              | 0.4783190   | 0.1532183  | 0.2844720  | 0.0926665  | 0.2803409   | 0.3608338   | 0.2144950   |           |
|              | 0.05675931  | 0.03127018 | 0.0783114  | 3.560704   | 0.11608340  | 0.1491222   | 0.04096654  |           |

|              |            |             |             |             |            |            |            |
|--------------|------------|-------------|-------------|-------------|------------|------------|------------|
| 0.2631568    | 0.1367971  | 0.9649083   | 5.348349    | 0.2524994   | 0.04764979 | 0          |            |
| 0.08076961   | 0.1141903  | 0.04062772  | 0.6603039   | 0.1645044   | 0.3445742  |            |            |
| 0.06202756   | 0.04528784 | 0.01481219  | 0.7381812   | 0           | 20.88582   | 0.5439752  |            |
| 0.1793986    | 0.05914499 | 2.1491140   | 2.483225    | 2.677530    | 0.1520681  | 0.3426124  |            |
| 0.08421893   | 0          | 1.979299    | 1.563396    | 0.05094425  | 4.0025830  | 0.3208721  |            |
| 3.1059410    | 0.09345739 | 0.2439039   | 0.3427159   | 0.3095287   | 0          | 0.01689646 |            |
| 0.2858988    | 0          | 0.1534289   | 0.2474124   | 1.1695860   | 0.2223047  | 0.03976661 |            |
| 0.06499783   | 0.02092752 | 0           | 0.4234707   | 0           | 0.1376684  | 0.08743506 | 0          |
| 0.1657105    | 0.2423088  | 0           | 0.06927547  | 0           | 0          | 0.01105007 | 0.2383015  |
| 0.0194398    | 0.1076660  | 0.07632043  | 0.1764236   | 0.8762411   | 0.0179131  |            |            |
| 0.3909903    | 0          | 0           | 11.6781     | 1.6071460   | 0.1169586  | 1.0884220  | 0.4309     |
| 0.4116942    | 0.03762874 | 0.1121055   | 0           | 5.6576720   | 1.2106870  | 0.1214267  | 0          |
| 1.4573720    | 2.042906   | 0.2493652   | 0.3150721   | 0           | 0.04510423 | 0.08826022 |            |
| 1.1691750    | 0.9226215  | 0.7764774   | 0           | 1.28056     | 0.3618406  | 0.3365161  |            |
| 0.3442376    | 0          | 1.7565050   | 0.1009620   | 0.1000646   | 0          | 0          | 0.8474103  |
| 2.6849620    | 0.1069997  | 0           | 0           | 0.2324080   | 0.3456388  | 4.5464540  | 0.08618001 |
| 0.07952151   | 0.1403503  | 0.2597830   | 0.2036490   | 0.2931367   | 0.1006236  | 0.1612981  |            |
| 0.5483853    | 0.4886874  | 0           | 0.57586     | 1.2280650   | 0.3229619  | 0.5007944  | 0          |
| 0.6082724    | 0          | 0.04668911  | 0.03315022  | 1.60616     | 0.1195462  | 0          | 0.2109988  |
| 0.07040373   | 0.1213721  | 0           | 0.2061350   | 0.6627099   | 0          | 0.1471004  |            |
| 0.1028396    | 3.34163    | 0.4750318   | 0.09701053  | 0           | 1.5622330  | 0.04807372 | 0          |
| 0.6591242    | 0          | 0.2238131   | 0.2414601   | 0.2524994   | 0.07881398 | 0          |            |
| 0.5685487    | 0.4530362  | 0.008596065 | 0.2273357   | 0           | 0.2386477  | 0.0475659  |            |
| 0.4328901    | 0.08916645 | 0.1082863   | 0.1557201   | 0.2045191   | 0          | 1.409605   |            |
| 0.1968483    | 0.1600770  | 0.3741126   | 0.04505408  | 0.3670080   | 0.1789234  | 0.05116938 |            |
| 0.3772067    | 0.07109851 | 0.05176516  | 0.2338393   | 0           | 0.05990562 | 0.3709487  |            |
| 0            | 0.2267650  | 0.3618406   | 0.07381812  | 0           | 0          | 0.0686593  | 0          |
| 0            | 0          | 0.04748231  | 1.1626350   | 0           | 0.3602324  | 0.09051066 | 0.04537885 |
| 0.1674270    | 0.03952807 | 0.1699210   | 0.4086079   | 0.09701053  | 0.03904253 |            |            |
| 0.4483657    | 0.03826832 | 1.0553682   | 4.780730    | 0.02498722  | 0.5470346  | 0.2405113  |            |
| 0.1683329    | 0.07029688 | 0           | 1.1415820   | 0.006666033 | 0.07961915 |            |            |
| TCGA-4Z-AA80 | 19         | 1           | 0.2552458   | 0.1364776   | 0.1322391  | 0.1686415  | 0          |
| 31.730990    | 0.03975307 | 0.09981756  | 0           | 0.09007926  | 0.02906028 | 0.3420969  |            |
| 1.4193670    | 0.1182290  | 0.1195839   | 0.04315985  | 0.05986412  | 0          | 0.0651750  | 0.05984432 |
| 0.2248065    | 1.812782   | 34.567640   | 0.1846625   | 0.03920053  | 0.33575    | 0.1309     | 0          |
| 0.6858892    | 0          | 0.1367870   | 0.07834166  | 0.3091510   | 0.0874142  | 0.1166289  |            |
| 0.1579598    | 0.1851916  | 0.04710287  | 0.05087455  | 0.1960418   | 0.1275629  |            |            |
| 0.04709062   | 0          | 4.5838210   | 0.05783613  | 0.2746640   | 0.8078984  | 0.5702812  |            |
| 3.8114250    | 0.1455127  | 0.7025203   | 0.1128237   | 0.1943816   | 0.7981749  | 0.32725    |            |
| 0.0129995    | 1.7354850  | 0.06140795  | 0.2849909   | 0           | 0.01841177 | 0.1410062  |            |
| 0.05465697   | 0.1269366  | 0.1766703   | 0.008084036 | 0.06839351  | 0.01931472 |            |            |
| 0.4804847    | 0.4261442  | 0.2238333   | 0.2757626   | 0.5388944   | 0          | 0.04146391 |            |
| 0.04005073   | 0.1649298  | 0.4592442   | 0.3465516   | 0.2305341   | 0.4741065  |            |            |
| 0.1414651    | 0.04439873 | 0.1159316   | 0           | 0.5303128   | 0          | 0          | 0.02114744 |



|              |            |            |             |            |            |             |
|--------------|------------|------------|-------------|------------|------------|-------------|
| 0.02850358   | 0.01116107 | 0.1931712  | 0           | 0.07303036 | 0.3611925  | 1.7887310   |
| 0            | 0          | 0          | 1.6308980   | 0.08312781 | 0          | 0.08207222  |
| 0.9356233    | 0.1440265  | 0          | 0.09200266  | 1.7522850  | 0.06040362 | 0.3658408   |
| 0.04518583   | 0.06140795 | 1.0727280  | 0.04887098  | 0.05348277 | 0.6029796  | 0           |
| 0.08631969   | 0.2486743  | 2.0561250  | 0.02942829  | 0.4381822  | 0.1762687  |             |
| 0.2977504    | 0.1538854  | 0.09200266 | 0.2096169   | 0.1436264  | 1.253467   |             |
| 0.3531796    | 0.01449145 | 0.04787546 | 0.1353547   | 0.06274939 | 0.5723856  |             |
| 0.6262467    | 0.7167099  | 0          | 0.04527627  | 0.05559731 | 0.05512313 | 0.4000425   |
| 0.1560528    | 0          | 0.7799578  | 0.06715     | 0.2983009  | 0          | 0.6545      |
| 0.5926002    | 0          | 0.08259664 | 0.3214374   | 0.5875625  | 0.4262613  | 0.0243664   |
| 0.3427448    | 0.4850422  | 0.06431032 | 0.2829506   | 0          | 0.3498680  | 0.07626179  |
| 0.3248999    | 0          | 0.03368436 | 0.2090519   | 0.2214368  | 0.1972488  | 0.4585853   |
| 0.1562377    | 0.5285059  | 0.4691969  | 0.1265224   | 0.2041006  | 0.1136385  | 0           |
| 0            | 0          | 0.4140120  | 0.1254988   | 0.2994281  | 0.0483681  | 0.3263463   |
| 0            | 0.2714991  | 0.2367468  | 0.4352315   | 0.03940968 | 0.2138630  | 0.2787175   |
| 0.07692124   | 0          | 0.7066255  | 0           | 0          | 0.2235108  | 0.1578964   |
| 0.1686049    | 1.7894430  | 0.1191371  | 0.4202434   | 0.08622373 | 0.02701437 |             |
| 0.4489513    | 0          | 0.04511823 | 0           | 0.01143084 | 0.6282459  | 0.1117554   |
| 0.05915961   | 0          | 0.8679581  | 1.1456960   | 0.1973492  | 0          | 0.2299482   |
| 0.1748418    | 0.2647039  | 0.8142598  | 0.01337442  | 0.7383254  | 1.1125160  |             |
| 0.04524985   | 0.2068220  | 0.2309570  | 0.04885046  | 0.2866906  | 0.3404166  | 1.365806    |
| 0.06313247   | 0.4853710  | 0.03735946 | 0.8450735   | 0          | 1.8177711  | 0.047044    |
| 0.08966271   | 0.08724212 | 0          | 0.08053816  | 0.03363324 | 0.03465516 | 0.3121056   |
| 0.07654404   | 0.06348907 |            |             |            |            |             |
| TCGA-G2-A3IE | 612        | 1          | 0.5157579   | 0.3171367  | 0.09352234 | 0.4651410   |
| 25.652490    | 0.1874282  | 0.6353381  | 0.4437771   | 0.3185299  | 0.2080895  |             |
| 1.2788162    | 1.1988140  | 0.35536    | 0.13943     | 0.03052357 | 1.0705260  | 0.02808543  |
| 0.3809087    | 0.05299599 | 7.40668631 | 4.31110     | 0.02374496 | 0.08317036 | 0.296812    |
| 0.09257528   | 0          | 1.3619430  | 0.08543747  | 0.03224624 | 0.08310735 | 0.6285848   |
| 0.9942909    | 0.2886887  | 0.2606626  | 0.3798173   | 0.0713832  | 0          | 0.06567392  |
| 0.1002391    | 0.7659804  | 0          | 34.714790   | 0.6135442  | 0.1942483  | 0           |
| 0.2688767    | 3.3735020  | 0.3773355  | 0.8611849   | 0.05699382 | 0          | 1.052432    |
| 0.0330626    | 0.02183462 | 4.8671670  | 0.1302871   | 0.5758620  | 0.01860171 |             |
| 0.4367161    | 0.03865458 | 0.7481022  | 0.1665933   | 0.04573763 | 0.7393602  |             |
| 0.2253864    | 0.3020525  | 2.87983710 | 8.03960     | 1.218908   | 0.07020588 | 0.005382284 |
| 0.2492554    | 0.01416237 | 0.08748143 | 0.1146308   | 0.09803549 | 0.4425334  | 0           |
| 0.02501179   | 0.1121419  | 0.1639786  | 0.1332140   | 0.2344054  | 0.06392873 |             |
| 0.07747296   | 0.1121694  | 0.1007917  | 0.002631115 | 0.8014737  | 0.09972883 | 0           |
| 0.1416043    | 1.3045610  | 0          | 0           | 0.03114756 | 6.7922792  | 7.337240    |
| 0.3482594    | 0.4395672  | 0.1166419  | 0.9286917   | 0.1018586  | 0.1137985  |             |
| 0.2277319    | 0.9618089  | 0.04271873 | 1.2074090   | 0.3474322  | 0.834522   |             |
| 0.1036878    | 0.04946237 | 0.7462701  | 0           | 0.06104714 | 0.2422331  | 0.8660661   |
| 0.1144677    | 0.4446274  | 0.1246610  | 7.491626    | 0          | 0.09759938 | 0.5153298   |
| 0.3555148    | 1.0980240  | 6.993734   | 0.1332326   | 0          | 0.1595429  | 0.2662663   |

|                                   |                    |                    |                           |                           |             |                           |
|-----------------------------------|--------------------|--------------------|---------------------------|---------------------------|-------------|---------------------------|
| 0.6409386                         | 0.5451017          | 0.07241037         | 0                         | 0                         | 0.1572784   | 1.4424184.385239          |
| 0.1103639                         | 0.05832095         | 0.4574268          | 0.09497983                | 0.6328945                 | 0.09187748  |                           |
| 0.1983756                         | 0                  | 0.1637339          | 1.3948660.1889780.1168282 | 0.8118836                 |             |                           |
| 2.8493951.0701870.0746739         | 0.8657016          | 3.7390510.09096327 | 0.1158524                 |                           |             |                           |
| 0.06730166                        | 1.2901920.7011417  | 0.1313007          | 0.02596183                | 0                         | 0.01642733  |                           |
| 0.1566049                         | 0.1115989          | 0.6081026          | 0.2794865                 | 0.2180329                 | 0.7963826   |                           |
| 0.4871655                         | 1.6786710.2411027  | 0.1313007          | 0.02791392                | 0.06218918                |             |                           |
| 0.4879969                         | 0.2662663          | 0.7163862          | 0.03420696                | 0.6034435                 | 0.9185972   |                           |
| 0.1708749                         | 0.1813428          | 0.2009189          | 0.2924148                 | 0.3065851                 | 0.2734108   |                           |
| 0.6682679                         | 0.09164721         | 0.05270034         | 0                         | 1.1890380                 | 0.1099216   | 0.2107622                 |
| 0.1038038                         | 0.09883037         | 0.7154459          | 0.4329454                 | 0.1805492                 | 1.331919    |                           |
| 0.06097927                        | 0.03821028         | 1.8189440          | 0.1276343                 | 0                         | 0.005389423 | 0.2799755                 |
| 0.1317264                         | 0.2432410.08367789 | 0.03469377         | 0.3361497                 | 0.3424197                 |             |                           |
| 0.1998210.05981554                | 0.0330626          | 0.1393923          | 0.1417335                 | 0.1011697                 |             |                           |
| 0.1040024                         | 0                  | 0.009458675        | 0.01606645                | 2.0606540.02353104        | 0.1386739   | 0                         |
| 0.3470927                         | 0.0499028          | 0.1967904          | 0.6286248                 | 0.2759791                 | 0.02232432  |                           |
| 0.3194270                         | 0.2642141          | 0.3539951          | 0                         | 4.5351943.6153430.1817793 |             |                           |
| 0.0822660.05425406                | 0.05695831         | 0                  | 0.2205798                 | 1.15269                   | 0.02706679  |                           |
| 0.04490083                        |                    |                    |                           |                           |             |                           |
| TCGA-ZF-A9R0                      | 680 1              | 0.01905482         | 0.1426381                 | 0                         | 0.1233778   | 0.5556006                 |
| 44.3061                           | 0.1327751          | 0.1384917          | 0.4520676                 | 0.3934913                 | 0.07531633  |                           |
| 1.2034920.3575392.0132350.1853488 | 0.2668532          | 0.1353242          | 0                         | 0.1245149                 |             |                           |
| 0.1362340.1250914                 | 0                  | 2.87205865.804330  | 0.04097003                | 0                         | 0.1368088   |                           |
| 4.10121                           | 2.5916890.2525209  | 0.04765385         | 0.04093899                | 0.9693178                 | 0.7384937   |                           |
| 0.08126236                        | 0.8804801          | 0.2032287          | 0.1265891                 | 0.01772367                | 0.07548617  |                           |
| 0.01481345                        | 0.1968651          | 0.04407787         | 20.860220.06044683        | 0.1435311                 |             |                           |
| 0.01183001                        | 1.5352120.2483431  | 6.30245            | 0.2027747                 | 0.1957952                 | 0.1179165   |                           |
| 0                                 | 1.49874            | 0                  | 0.2768207                 | 1.5636420                 | 0           | 1.1914210.2046950.4700757 |
| 0.3303146                         | 0.2284967          | 0.4864437          | 0.1846451                 | 0.03379579                | 0.2246539   |                           |
| 0.3229852                         | 0.2231883          | 0.8907605          | 7.4859870.07205262        | 0.07410788                |             |                           |
| 0.8351699                         | 0.2816813          | 0.04185861         | 0                         | 0.1411689                 | 0           | 0.3442004                 |
| 0.1108881                         | 0.02651593         | 0.3634942          | 0.04921627                | 0.4849696                 | 0.09447459  |                           |
| 0.1144904                         | 0.2210203          | 0.05958045         | 0.2993984                 | 0.3903224                 | 0.3930143   |                           |
| 0.4579616                         | 1.1776250.8178946  | 0.004478656        | 0.03910236                | 0                         | 2.301511    |                           |
| 6.6918032.1285640.1484601         | 0.07018113         | 0.6320406          | 0.1292810.977857          |                           |             |                           |
| 0.1505278                         | 0.1681726          | 0.09615564         | 2.81541                   | 0.1262604                 | 0.5098063   |                           |
| 0.0067465                         | 0                  | 0.7287480.51077    | 0.4256769                 | 0.2363242                 | 0           | 0.09021614                |
| 0.2549957                         | 1.09027            | 0.1230267          | 0.1194682                 | 0.06140849                | 0.9335722   |                           |
| 0.08041587                        | 3.6539140.2295113  | 0                  | 1.2951610.7382441         | 0.2069897                 |             |                           |
| 0.05003654                        | 0.2357743          | 0.06558188         | 0.5483711.4265080         | 0.1248986                 |             |                           |
| 0.04732002                        | 0.1743209          | 0.2880569          | 1.5678760                 | 0                         | 0.1192924   | 0                         |
| 0.1039221                         | 0                  | 0.04886028         | 0                         | 0.7259033                 | 0.4869698   | 0.1745461                 |
| 0.1726501                         | 0.5759091          | 1.4913490.6014285  | 1.6553090.1023475         | 0.8110990                 |             |                           |
| 0.1089505                         | 0.0663061          | 0.3003644          | 0.03985211                | 0.09701879                | 0.08632503  |                           |

|              |            |            |            |            |            |            |
|--------------|------------|------------|------------|------------|------------|------------|
| 0.0528073    | 0.1456589  | 0.0578581  | 0.3435877  | 0.1198214  | 0.2305274  |            |
| 0.2301511    | 0.2942258  | 0.3330328  | 1.0191650  | 0.05938403 | 0.09701879 |            |
| 0.0412515    | 0.2757116  | 0.5288560  | 0.8056648  | 0          | 0.5329336  | 0.5351735  |
| 1.3257350    | 0.04729242 | 0.1484601  | 0.4321338  | 0.1647545  | 0.05158078 |            |
| 0.8454768    | 0.2708745  | 0.04773361 | 0          | 3.7944770  | 0.1783481  | 0.05414776 |
| 0.07786667   | 0.3370203  | 0.09736841 | 0.7636012  | 0.1968651  | 0.03557569 |            |
| 0.2277401    | 0.04505792 | 0.1694027  | 2.1552160  | 0.3070424  | 0.4715486  |            |
| 0.07110456   | 0.2946883  | 0.4497293  | 0.5450667  | 0          | 0          | 0.1025417  |
| 0.4643679    | 0.6854963  | 0.07382441 | 0          | 0.04886028 | 0.3089931  | 0.314183   |
| 0.3073256    | 0.1229567  | 0          | 0          | 0.8310111  | 0.8858929  | 0          |
| 0.07543198   | 0.06807407 | 0.08812699 | 0.5534401  | 0          | 0          | 0.6129640  |
| 0.3123669    | 0.4008459  | 0          | 2.0053713  | 0.2829220  | 0.1249467  | 0.2127538  |
| 0.08017725   | 0.08417363 | 0.02343429 | 0          | 0.2355845  | 0          | 0.01327099 |
| TCGA-FD-A43S | 455        | 0          | 0.02961309 | 0.01583385 | 0          | 0.1643497  |
| 60.562660    | 0.5158643  | 0.2690374  | 0.5404293  | 0          | 0.02926227 | 2.991375   |
| 0.1984469    | 1.3997120  | 0.1440252  | 0.5407063  | 0.3154609  | 0.04861718 |            |
| 0.06450285   | 0.07057371 | 0.07290166 | 0          | 1.97744267 | 0.601340   | 0.06135101 |
| 0.4934542    | 1.4315240  | 0.05315362 | 7.4047262  | 2.2495371  | 0.6188260  | 0.03702942 |
| 0.09415102   | 0.2484696  | 0.03157245 | 1.5393980  | 0.1052792  | 1.10935    | 0.08263304 |
| 0.07373961   | 0.04604315 | 0.1147305  | 0.4452591  | 14.9331    | 0          | 0.02788271 |
| 0.5607427    | 1.6701110  | 0.23157    | 10.146240  | 0.1141069  | 0.2356124  | 0.07893112 |
| 1.6260390    | 0.2546932  | 0.2356510  | 0.09974194 | 0.6282172  | 1.3997120  | 0.6664617  |
| 0.1776952    | 0          | 0.4810794  | 1.24348    | 0.03282626 | 0.2539160  | 0.5097942  |
| 0.1300713    | 0.3076291  | 0.13613    | 0.08398271 | 0.7831630  | 0.5500781  | 0.05051085 |
| 0.1626311    | 0.03348593 | 0.08775623 | 0          | 0.2942070  | 0.02264906 | 0.02872186 |
| 0.2524014    | 0.1883020  | 0.03824349 | 0          | 0          | 0.04448237 | 0.00858719 |
| 0.1691982    | 0.1882551  | 0.2290438  | 2.6096321  | 0.04261    | 0.6809409  | 0.04872195 |
| 0.3038448    | 0          | 1.5380143  | 0.1395411  | 0.2151840  | 0.07690725 | 0.05453423 |
| 0            | 0.05332236 | 0          | 0.2613570  | 0.03735886 | 3.57893    | 0.09811065 |
| 0.04193893   | 0          | 0.1306785  | 0.1190681  | 0.7083202  | 0.1224238  | 0.1615052  |
| 0.03505122   | 0.08001983 | 1.00681    | 0.01194973 | 0.6188851  | 0.0954349  |            |
| 1.6368720    | 0.03124357 | 4.1841920  | 0.00810644 | 0          | 1.0642440  | 0.1922250  |
| 0.03664167   | 0.05096038 | 0.03873741 | 1.9561190  | 0.0415756  | 0.2911573  |            |
| 0.07354003   | 0.6321280  | 0.3581352  | 1.6650340  | 0.03348593 | 0.1338944  |            |
| 0.1636027    | 0.1211289  | 0.1582589  | 0.07593374 | 0          | 1.7548630  | 0.5584152  |
| 0.7052812    | 0.03353942 | 0.0745850  | 0.06816779 | 0.1947251  | 0.7413950  | 0.03976454 |
| 0.9453964    | 0          | 0.02418857 | 0.1545694  | 0.8321149  | 0.1548354  | 0          |
| 0.2385026    | 0.06838983 | 0.1509123  | 0          | 0.1922290  | 0.2327681  | 0.4776834  |
| 0.1430711    | 0.03810468 | 0.08752956 | 1.3997120  | 0.1845774  | 0.3392479  |            |
| 0.03205447   | 1.9995880  | 0.4586435  | 0.4708247  | 0.1571239  | 0.2153403  |            |
| 0.2992138    | 3.2213     | 0.0612476  | 0.03845362 | 0.9190028  | 0.06401121 |            |
| 0.00668014   | 0.1214580  | 0.05466099 | 0.03696422 | 0.6332344  | 0.6929267  |            |
| 0.1262265    | 0          | 1.0836480  | 1.5062120  | 0.4206784  | 0.2349747  | 0.6573     |
| 0.0233415    | 0.3729647  | 0.1406940  | 0.43741    | 0          | 0.2762589  | 0.6343573  |
|              |            |            |            |            |            | 0.1607525  |

|              |             |            |             |            |             |            |            |
|--------------|-------------|------------|-------------|------------|-------------|------------|------------|
| 0            | 0.1396608   | 0.04804503 | 0.31872     | 0.05034935 | 0.2080364   | 0.6883829  | 0          |
| 0.03796687   | 0.1867468   | 0          | 0.03227125  | 0.02388587 | 0.1653203   | 0.02172341 |            |
| 0.03689926   | 0.4732632   | 0          | 0           | 0.1679654  | 0.1172288   | 0.04848886 |            |
| 0.1129904    | 0.2150252   | 0.4225545  | 0           | 0.2463639  | 0           | 0.06068115 |            |
| 0.4856933    | 0.08921676  | 1.02518    | 12.34231    | 0.01941797 | 0.4014922   | 0.1869051  |            |
| 0.1308142    | 0.5644979   | 0          | 0.7322436   | 0.02072112 | 0.07218554  |            |            |
| TCGA-XF-A8HG | 467         | 1          | 0.1155498   | 0.2824385  | 0.1795941   | 0.3817204  | 0          |
| 38.319590    | 0.3239321   | 0.2108747  | 0.5681334   | 0.1468041  | 0.1677339   |            |            |
| 0.3097347    | 0.8261327   | 0.08920387 | 0.04974629  | 0.03907695 | 0           | 0.0359556  |            |
| 0.09834914   | 0.05418309  | 0          | 3.558624    | 116.92590  | 0.2203915   | 0          | 0.07599706 |
| 0            | 0.7165437   | 0          | 0.2064118   | 0.03546529 | 0.8397164   | 1.7279960  | 0.3695857  |
| 0.3337060    | 0.3185779   | 0.1218485  | 0.05373882  | 0.2821257  | 0.2438239   |            |            |
| 0.1705435    | 0           | 7.4703490  | 0.3141892   | 0.06217024 | 0.01024829  | 0.8644666  |            |
| 0.9896382    | 6.19476     | 0.2634945  | 0.4240416   | 0.05837181 | 0           | 0.9063972  | 0          |
| 0.01324097   | 0.7043802   | 0          | 0.1111976   | 0.5529235  | 0           | 0          | 0.1012532  |
| 0.2969187    | 0.5746423   | 0          | 0.02195787  | 0.4423109  | 0.0786940   | 0.9304834  |            |
| 1.5433259    | 0.183180    | 0.2496757  | 0           | 0.02067156 | 0.1689365   | 0.01813098 |            |
| 0.3359870    | 0.6603882   | 0.3765216  | 0.5367232   | 0          | 0.2881858   | 0.06316929 |            |
| 0.1049645    | 0.08527175  | 0.7802365  | 0           | 0.1487739  | 0.2776302   | 0          |            |
| 0.02021047   | 0.2973255   | 0          | 0           | 0.2559318  | 3.3655610   | 0.01163953 | 0          |
| 0.0398758    | 0.6015842   | 0.7150077  | 0.2143507   | 0.1486165  | 0.3193951   |            |            |
| 0.1493276    | 0.8322523   | 0.3912049  | 0           | 0.1665985  | 3.7413460   | 0.2187579  |            |
| 0.1656162    | 0           | 0.2779940  | 0.2428122   | 0.4867260  | 0.0260741   | 0.5459381  | 0          |
| 0.1953848    | 0.2718791   | 2.0395660  | 0.06661097  | 0.08624574 | 0.3191877   |            |            |
| 2.9135740    | 0.03483199  | 0          | 0.4518744   | 0.1300394  | 0.6835130   | 0.4476767  |            |
| 0.2842790    | 0.3676507   | 0.3976934  | 0.6046113   | 0.6106199  | 0.09270136  | 0          |            |
| 0            | 0           | 0.2994511  | 1.49407     | 0.5651612  | 0           | 0.4650416  | 0          |
| 0.0588118    | 0.04232748  | 0.08717726 | 1.0480791   | 1.3843570  | 0.06048345  | 0.2617407  |            |
| 0.2910296    | 1.8999270   | 0.7622261  | 0.1029530   | 0.4433162  | 0.9222307   | 0          |            |
| 0.6337174    | 0.02872036  | 0.3620237  | 0.2071424   | 0.1680940  | 0.04154614  | 0          |            |
| 0.1261838    | 0.05012226  | 0.07143569 | 0.4671039   | 0.2413103  | 0.6778886   |            |            |
| 0.7221790    | 0.09758259  | 0.8418341  | 0.05144416  | 0          | 0.07147204  | 0.1592319  |            |
| 0.7913431    | 0.05681334  | 1.4016570  | 0.7017512   | 0.4862343  | 0.05468947  |            |            |
| 0.1365641    | 0.2572208   | 0.3546529  | 0           | 0.3872634  | 0.5108569   | 0.1759932  |            |
| 0.08705567   | 0           | 0.3529816  | 0           | 0          | 0.4047336   | 0.05235135 | 0.4217495  |
| 0.9159298    | 1.1085330   | 0.1232763  | 0.7327928   | 0.1171005  | 0           | 0.1894614  |            |
| 0.08866324   | 0.1225502   | 0          | 0.006899659 | 0.5532303  | 0.1349112   | 0          | 0          |
| 0.04441574   | 0.7203622   | 0.8308703  | 0           | 0.07657719 | 0           | 0.3271640  | 0.09072517 |
| 0.2590395    | 0.07988769  | 0          | 0           | 0.01028431 | 3.9331590   | 0.1204998  | 0.2185026  |
| 0            | 0.1045543   | 0.03440052 | 0.1908602   | 0.8047794  | 0           | 0.08574027 |            |
| 0.7690467    | 0           | 0.3044275  | 0.8063294   | 0          | 1.3257922   | 0.3142210  | 0.2760143  |
| 0.06945725   | 0.2187579   | 0.04060207 | 0           | 0.3610752  | 0.005775252 | 0.1264627  |            |
| TCGA-K4-A83P | 495         | 0          | 0.0536782   | 0.0717531  | 0.04866732  | 0.26067015 |            |
| 1.50336711   | 39.14375392 | 0.60780336 | 0.46816412  | 0.17143172 | 0.1847468   |            |            |

|              |             |            |            |            |            |
|--------------|-------------|------------|------------|------------|------------|
| 0.02652114   | 5.71108256  | 0.25180046 | 0.69648337 | 0.16679313 | 0.16652387 |
| 0.2223747    | 0.02517886  | 1.13998142 | 0.04797207 | 0.11012107 | 0.11031258 |
| 1.61632107   | 40.14887397 | 0.12356442 | 0.30296235 | 0.6178221  | 0.19269793 |
| 6.28633987   | 1.12620143  | 0.8892019  | 0.03356071 | 0.25948528 | 0.39821359 |
| 0.55226228   | 0.11445967  | 0.54257615 | 0.18401893 | 0.49528685 | 0.08113348 |
| 0.11391835   | 0.07302766  | 0.2426274  | 0.15521142 | 3.70167454 | 0.17028117 |
| 0.12635405   | 0.24161064  | 1.08118867 | 0.48971487 | 5.16125331 | 0.1785077  |
| 1.44785266   | 0.64062451  | 0          | 0.49787862 | 0.17205172 | 0.4174163  |
| 0.19028921   | 0.18079735  | 0.14983402 | 0.92261434 | 0.83054298 | 0.20399633 |
| 0.16092111   | 0.46715845  | 1.43042001 | 0.08925385 | 0.18698108 | 0.64685535 |
| 0.18665436   | 0.97584209  | 1.6475256  | 0.15223137 | 0.33402384 | 0.71141387 |
| 0.06103904   | 0.54536798  | 0          | 0.23860716 | 0.35711111 | 0.43633194 |
| 0.10412542   | 0.1820726   | 0.25599445 | 0          | 0.14637631 | 0          |
| 0.0629402    | 1.06522523  | 0.27962797 | 1.1071372  | 0.59129415 | 1.34083815 |
| 0.74058502   | 0.1293197   | 0          | 0.20683609 | 3.30655862 | 0.80028171 |
| 0.45306954   | 0.1372938   | 0.65531696 | 0.15174578 | 0.61617457 | 0.1060107  |
| 0.11843727   | 0.10157787  | 1.2031437  | 0.04446009 | 0.4487953  | 0.02375645 |
| 0.04519934   | 0           | 0.32374345 | 1.21126166 | 0.38834532 | 1.24419866 |
| 0.15195508   | 1.70258764  | 0.06498208 | 0.72918487 | 0.08649509 | 3.56555192 |
| 0.22653477   | 4.46942621  | 0.16163562 | 0          | 1.13229941 | 0.20796635 |
| 0.28190994   | 0.2324650   | 0.1385601  | 0.21065226 | 1.26465498 | 0.11304309 |
| 0.02932037   | 0.46655848  | 0.45014651 | 0.16229357 | 0.22083854 | 0          |
| 0.3313842    | 0.09885154  | 0.25615855 | 0.14343408 | 0.06882069 | 0.10630682 |
| 4.03299513   | 0.94561916  | 0.68838473 | 0.09119291 | 0.37179063 | 0.6178221  |
| 0.34904657   | 1.14185481  | 0.57663396 | 1.14244927 | 0.04733562 | 0.1096136  |
| 0.16343858   | 0.41387213  | 0.02806625 | 0          | 0.16887576 | 0.08677684 |
| 0.04074715   | 0.19358007  | 0.54850547 | 0.37205497 | 0.06483448 | 0.13814098 |
| 0.16555885   | 1.10167436  | 0.37639623 | 0.34163233 | 0.08715536 | 3.5598321  |
| 0.27087432   | 0.41568031  | 0.46892363 | 0.0712027  | 0.25271808 | 0.46423212 |
| 0.78546168   | 0.09991849  | 0.24396052 | 0.46451069 | 0.14503751 | 0.06054381 |
| 0.2651940    | 0.14307459  | 0.07431099 | 0          | 1.47066117 | 0.06280172 |
| 1.12618473   | 0.30857709  | 0.20683609 | 2.0450024  | 0.11274542 | 0.51553367 |
| 0.0317325    | 0.05965179  | 6.6846260  | 0.14415849 | 0          | 0.95144603 |
| 0.38007165   | 0.10967678  | 0.04219273 | 0.30481109 | 0.25275606 | 0.44111807 |
| 0.49934341   | 0.15597476  | 0.06225383 | 0.10323103 | 0.19343248 | 0.07375551 |
| 0.11699306   | 0.0865935   | 0          | 0.01968848 | 0.20065646 | 0.46792428 |
| 0.02220411   | 0.20297515  | 0.11687221 | 0.06791763 | 0.35997306 | 0.59856883 |
| 0.02393575   | 0.11617168  | 0.35229553 | 0.3074691  | 0.05499688 | 0.55981487 |
| 0.24257831   | 0.8548148   | 8.25077681 | 0.09239476 | 0.3210729  | 0.05646564 |
| 0.11856025   | 0.34658052  | 0.02550794 | 0.29353801 | 0          | 0.21496325 |
| TCGA-GD-A2C5 | 812         | 0          | 0.08825991 | 0.3910174  | 0.09145236 |
| 0.03869899   | 30.760060   | 0.08785718 | 0.09163985 | 0.4371941  | 0.1735819  |
| 0.1245919    | 1.4319230   | 0.5069641  | 1.2620430  | 0.3066128  | 0.07823012 |
| 0            | 0.3570294   | 0.1051702  | 0.1655457  | 0.1036462  | 0.33067249 |
|              |             |            |            |            | 0.569610   |
|              |             |            |            |            | 0.05804849 |

|            |            |            |            |              |            |
|------------|------------|------------|------------|--------------|------------|
| 0.01355492 | 0.05804849 | 0.1357894  | 0.5587167  | 0.9486782    | 0.2506393  |
| 0.06306503 | 0.1083572  | 0.6413968  | 0.2871511  | 0.2285277    | 0.8739195  |
| 0.2497416  | 0.1489136  | 0.02345547 | 0.09989827 | 0.1372287    | 0.3907964  |
| 0.1166652  | 7.4812570  | 0.1199929  | 0.07123082 | 0.07827905   | 1.47298    |
| 0.3943883  | 2.5503150  | 0.4696156  | 0.4534513  | 0.3232476    | 0          |
| 0.9168685  | 0.06466161 | 0.1134992  | 1.0346610  | 0.08939468   | 0.04246778 |
| 0.3660255  | 0.0270893  | 0.02364698 | 0.2521949  | 0            | 0.5852352  |
| 1.1403420  | 0.01677198 | 0.2432508  | 0.2938637  | 0.5445831    | 0.3753036  |
| 0.9658190  | 0.1668701  | 0.6865197  | 0.1105262  | 0.2150634    | 0.04154671 |
| 0.0570301  | 0.6165150  | 0.2396640  | 0.2505329  | 0.07714751   | 0.1956655  |
| 0.1579101  | 0          | 0.1302655  | 0.3667474  | 0.06251376   | 0          |
| 0.1608739  | 0.01971217 | 0.07204061 | 0.7258447  | 0.4225930    | 0.2020219  |
| 0.3991197  | 1.7009150  | 0.05334342 | 0.0517480  | 0.03886725   | 0.5482468  |
| 0.7936911  | 1.1785150  | 0.2292171  | 0.1186769  | 0.3717517    | 0.2851505  |
| 0.4994750  | 0.1743072  | 0.07418646 | 0.1272522  | 1.5012160    | 0.1670929  |
| 0.3373384  | 0.03571323 | 0.3397422  | 0.2967458  | 0.4393689    | 0.4353083  |
| 0.4691266  | 0.06876514 | 0.1790878  | 0.2238923  | 2.0492820    | 0.1933408  |
| 0.4743122  | 0          | 1.690876   | 0.07981668 | 0.7953263    | 0.3865716  |
| 0.04966371 | 0.9949160  | 0.4884955  | 0.1002182  | 0.1324366    | 0.2808210  |
| 0.08679095 | 0.7587002  | 1.0771780  | 0.07080767 | 0            | 0.1252465  |
| 0.03844932 | 0.7624280  | 0.3804029  | 0          | 0.0570301    | 0.3552106  |
| 0.7430207  | 1.1346250  | 0.04492195 | 0.2263156  | 0.06658821   | 0.2668498  |
| 1.0010950  | 0.1616958  | 0.3998484  | 0.3493221  | 0.0448730    | 0.3795405  |
| 0.747062   | 0.2708931  | 0.3753030  | 0.1441850  | 0.1754988    | 0.5098392  |
| 0.1582207  | 0.1604931  | 0.0571212  | 0.2096553  | 0.2088285    | 0.1148540  |
| 0.1364110  | 0.8325003  | 0.4449077  | 0.1218326  | 8.0795920    | 0.1912012  |
| 0.9671354  | 0.07858873 | 0.03209863 | 0.1364804  | 0.5473144    | 0.5726350  |
| 0.3905593  | 0.5022668  | 0.01672492 | 0.5736305  | 0.4145840    | 0.7519179  |
| 0.1251734  | 0.0327453  | 0.2407937  | 0.2997992  | 0.1308354    | 0.3525954  |
| 0.1792375  | 0.07314488 | 0          | 1.0279120  | 0.03582953   | 0.1030486  |
| 0.4890754  | 0.3865716  | 0.9716813  | 0.4559291  | 0.09416161   | 0.7857690  |
| 0.08944437 | 0.07472909 | 1.3287510  | 0.3744280  | 0.2213457    | 0.1964064  |
| 0.1545729  | 0          | 0.08182579 | 0.1017776  | 0.8432112    | 0.6365867  |
| 0.05849161 | 0.1939848  | 0.1817427  | 0          | 0.2748069    | 0.08136034 |
| 0          | 0          | 0.8169637  | 6.0084950  | 0.2294846    | 0.4290945  |
| 0.2894970  | 0.07507426 | 0.3090618  | 0.4577635  | 0.06746768   | 0.0436604  |
| 0.9697050  | 0.1604931  | 0.2325295  | 0.7687448  | 0.3038913    | 1.6063113  |
| 0.428837   | 0.1942913  | 0.1810016  | 0.1061064  | 0.3341857    | 0.02325967 |
| 0          | 0.4916408  | 0          | 0.08781403 | TCGA-XF-AAMX | 206        |
| 1          | 0.2023658  | 0.4918325  | 0.06671814 | 0.6126057    | 0.02823246 |
| 20.5275    | 0          | 0.1470808  | 0.3693111  | 0.1266349    | 0.1090737  |
| 0.5754709  | 0.6903877  | 0.9548107  | 0.08947452 | 0.05218011   | 0.08710115 |
| 0.4314719  | 0.4007188  | 0.05480419 | 0.03019305 | 0.07561389   | 5.778589   |
| 23.565050  | 0.0677579  | 0.01977771 | 0          | 0.06604251   | 0          |
| 1.1978630  | 0.1219009  | 0.1380254  | 0.1581018  | 0.4289308    | 0.2572662  |
| 0.1176848  | 0.9032087  | 0.3737363  | 0.08147879 | 0.04277926   | 0.08537345 |
| 0.1001138  | 0.2851016  | 0          | 10.202130  | 0.4668777    | 0.3117943  |
| 0.03426461 | 0.8893225  | 0.8631661  | 0.248172   |              |            |

|              |            |             |            |             |            |            |
|--------------|------------|-------------|------------|-------------|------------|------------|
| 0.04894333   | 0.8979150  | 0.09758152  | 0.09807065 | 0.4914310   | 0.1415197  | 0.04591013 |
| 2.0531270    | 0.06521698 | 0.4957112   | 0.7524650  | 0.01061626  | 0.1864394  | 0.2206071  |
| 0.8539049    | 1.48558    | 0           | 0.2267560  | 0.1169374   | 0.9292663  | 1.0033383  |
| 0.2086943    | 0.02861963 | 0.007679362 | 0.3347143  | 0.06061997  | 0.1664229  |            |
| 0.6814732    | 0.2098134  | 0.9969475   | 0.7035273  | 0.2498051   | 0.03200048 |            |
| 0.1169811    | 0.09503386 | 1.0033380   | 0          | 0.09602501  | 0.02876162 | 0.02252421 |
| 0.3638507    | 0.09486107 | 0           | 0.2773084  | 3.3842330   | 0.06918427 | 0          |
| 0.1777635    | 0.3047523  | 2.22283     | 0.04777801 | 0.007528656 | 0.4915640  | 0.1664229  |
| 1.0434720    | 0.1453303  | 0           | 0.04641778 | 11.295040   | 0.2438018  | 0.3691527  |
| 0.01302711   | 0          | 1.08244     | 0.2465670  | 0.2698348   | 0.3042192  | 0          |
| 0.08522001   | 1.4492660  | 0.1336261   | 0.07689549 | 0.05928817  | 0.4680023  | 0          |
| 0.04641778   | 0.08057697 | 0           | 1.1354580  | 0.2851016   | 0.2242138  | 0.04830888 |
| 0.09105338   | 0.1899524  | 0.2406531   | 0.4536834  | 0.5682272   | 0          | 0.04568615 |
| 0            | 0.2781108  | 1.1605340   | 0.1049770  | 0.04160573  | 0.4670925  | 0          |
| 0.1310894    | 0.7075984  | 0           | 0.5450972  | 0.8535836   | 0.06740773 | 0.2500332  |
| 0.8340360    | 0.5928817  | 1.0645480   | 0.2212829  | 0.6916953   | 0.7830932  | 0.06489252 |
| 0.1502695    | 0.03200834 | 0.6052035   | 0.0384761  | 0.1873378   | 0.04630244 |            |
| 0.01699465   | 0.3046975  | 0.1117207   | 0.1326897  | 0.4048948   | 0.7604398  |            |
| 0.3555271    | 0.0889220  | 0.3168054   | 0.6712391  | 0           | 0          | 0.1194815  |
| 1.0211910    | 0.06331746 | 0.7135619   | 0.02440299 | 0.9364491   | 0.1342080  | 0.2844354  |
| 0.1521983    | 0.5255581  | 0.4611302   | 0.3976645  | 0.1493994   | 0.672234   |            |
| 0.06538043   | 0.07034096 | 0           | 0.9343055  | 0.08609503  | 0          | 0.1503562  |
| 0.3545560    | 0.7050485  | 0.6805250   | 0.04751693 | 0.3434733   | 0.9894449  | 0.2320115  |
| 0.1090357    | 0.2879337  | 0           | 0.3186868  | 0           | 0.06920594 | 0.7294576  |
| 0.1127671    | 0          | 0           | 0          | 0.4379078   | 2.03377    | 0.1425508  |
| 0.06629427   | 0.1011116  | 0.2004826   | 0.5045227  | 0           | 0          | 0.2865421  |
| 0.5880220    | 0.1007212  | 0.4413752   | 0          | 0.3932682   | 0.1095393  | 0.1829309  |
| 0.1717492    | 0          | 0.06370401  | 0.4693582  | 0           | 0.1507907  | 1.0626250  |
| 1.2737691    | 0.0875970  | 0.1809489   | 0.1173759  | 0.1548178   | 0.1625345  | 0.01131257 |
| 0            | 0.8923048  | 0.09010982  | 0.05125107 |             |            |            |
| TCGA-DK-A1AE | 491        | 0           | 0.1358974  | 0.2634037   | 0.0924085  | 0.2356929  |
| 0.0782072    | 90.949490  | 0.2160619   | 0.1705058  | 0.7015869   | 0.04196484 |            |
| 0.3858383    | 0.1138366  | 0.6769778   | 0.05048894 | 0.07076681  | 0          | 0.2111568  |
| 0.2775094    | 0.09108838 | 0.02787942  | 0.2792791  | 0.67175288  | 0.0489     | 0.152504   |
| 0.7122250    | 0.3519324  | 0.06098181  | 0.5914419  | 0.5161675   | 0.02813997 |            |
| 0.08496584   | 0.1459868  | 0.5580884   | 0.2409460  | 0.2445004   | 0.3188815  |            |
| 0.1380391    | 0.1912229  | 0.05530164  | 0.1788128  | 0.0660302   | 0.0219379  |            |
| 1.5521516    | 0.00365    | 0.2424948   | 0.07997283 | 0.01054633  | 0.2737252  | 0.3320931  |
| 10.138640    | 0.3841397  | 2.0291370   | 0.09761272 | 0           | 0.3025157  | 0          |
| 0.5854678    | 0          | 0.2002550   | 0.4741696  | 0           | 0.05514049 | 0.08607645 |
| 0.3942359    | 0.2743487  | 0.01129823  | 0.1411040  | 0.1664642   | 0.4290293  |            |
| 2.8455390    | 0.1042763  | 0.1445269   | 0.08588634 | 0.04963636  | 0.2221410  | 0.02798739 |
| 0            | 0.2391163  | 0.1937358   | 0.1227405  | 0           | 0.2141871  | 0.2275223  |
| 0.05400856   | 0.08775161 | 0.4323454   | 0          | 0.05103351  | 0.08866681 | 0.02655768 |

|              |             |             |            |             |            |            |
|--------------|-------------|-------------|------------|-------------|------------|------------|
| 0.02599779   | 0.1679848   | 0.06569404  | 0.06804468 | 3.6726151   | 6.405760   | 0.9382789  |
| 0            | 0.02618241  | 0.2667305   | 1.0130390  | 0.3291743   | 0          | 0.1633661  |
| 0.1728791    | 0.7876334   | 0.05032274  | 0.04997472 | 0.08572177  | 1.949444   |            |
| 0.1125599    | 0.1988381   | 0.009021654 | 0.1716471  | 0.3498231   | 0.06830194 |            |
| 3.2582180    | 5.618150    | 0           | 0.1398929  | 1.5354220   | 0.06854814 | 0.9230409  |
| 0.1094901    | 0.8882882   | 0.1254574   | 0.5357610  | 0.0325511   | 0.0669106  |            |
| 1.0749930    | 1.974411    | 0.4410699   | 0          | 0.1891713   | 0.05846557 | 0.5555308  |
| 0.5460902    | 0.02384932  | 0           | 0.08437064 | 0.02590088  | 0.3338397  | 0.3727322  |
| 0.1211661    | 0.4610108   | 0.5996844   | 0.06256576 | 0.3242591   | 0.2420886  | 0          |
| 0.04485627   | 0.3954716   | 1.0368510   | 0.1731552  | 0.1925314   | 0.7038648  |            |
| 0.4021255    | 0.2345970   | 7.755547    | 1.8755050  | 1.497999    | 0.1248792  | 0.0147778  |
| 0.4540478    | 0.05329163  | 0.04324563  | 0.1752929  | 0.04707717  | 0.3354548  |            |
| 0.02578995   | 0.07963927  | 0.5608028   | 0.6165385  | 0.2256950   | 5.245985   |            |
| 0.07858994   | 0.4261149   | 0.3970519   | 0.1081141  | 0.1471012   | 0.08193135 |            |
| 0.4929002    | 0.02923279  | 0.6054601   | 0          | 0.4925254   | 0.6661969  | 0.1406999  |
| 0.2037767    | 0.1985260   | 1.824835    | 0.2386750  | 2.490786    | 0.1963509  | 0.0905557  |
| 0.1153438    | 0           | 0.06810881  | 0          | 0           | 0.03470867 | 1.0142780  |
| 0.2094593    | 0.8336403   | 0.1585768   | 0.6163349  | 0.08703213  | 0.1006805  |            |
| 0.3509483    | 0.04562086  | 0.1471333   | 0          | 0.1668574   | 0.1764088  | 0.1214803  |
| 0.1068196    | 0.02756043  | 0.04570743  | 0.6594786  | 1.43205     | 0          | 0.0788042  |
| 0.08711688   | 0.1377321   | 0           | 0.07404801 | 0.3288439   | 0          | 9.4644060  |
| 2.0484520    | 1.705058    | 0.06324106  | 0.7708101  | 0.3362342   | 0.03540095 |            |
| 0.3928215    | 0.4405233   | 0.03029914  | 0.04411688 | 0.3360360   | 5.838160   | 0.03480898 |
| 4.9241630    | 0.5117808   | 0.7056977   | 2.8908250  | 2.060692    | 0.0135477  | 0.0714772  |
| 0.2626397    | 0.01566857  | 0.04843395  | 0.4119647  | 2.09498     | 0.2543654  |            |
| TCGA-FJ-A3ZE | 324         | 1           | 0.1999295  | 0.3207014   | 0.0453165  | 0.1271404  |
| 0.03835227   | 112.64010   | 0.4540941   | 0.4788852  | 0.3440534   | 0.7778964  |            |
| 0.2589223    | 0.9378545   | 1.2044120   | 1.350515   | 0.07309898  | 0          | 0.02930657 |
| 0.1861213    | 0.1230469   | 0.1027174   | 7.722834   | 129.21370   | 0.1208097  | 0.1612017  |
| 0.2301136    | 0.0448576   | 0           | 0.9582590  | 0.09375     | 0          | 0.8210482  |
| 0.06661185   | 2.4539210   | 3.109666    | 0.07840155 | 0.01162266  | 0.08344559 |            |
| 0.3011411    | 1.0973360   | 16.677530   | 2.378356   | 0.3059014   | 0          | 1.459783   |
| 0.1954274    | 10.856970   | 2.991909    | 1.1234720  | 2.098855    | 0.3996711  | 2.679602   |
| 0.1602057    | 0.01447792  | 0.65625     | 0          | 0.3366984   | 0.6138780  | 0          |
| 0.07492072   | 0.2899959   | 0.04036162  | 0.07202744 | 0.3013393   | 0.3640386  |            |
| 0.3567534    | 2.3040871   | 11.428980   | 0.378      | 0.009719556 | 0.0052160  | 2.841821   |
| 0.2333220    | 1.130383    | 0.2592085   | 0.04750335 | 0.1128583   | 0          | 0.07271717 |
| 0.08694186   | 0.1589126   | 0.06454918  | 0.4997596  | 0           | 0          | 0.1014571  |
| 0.9181712    | 0.005099655 | 0.2074175   | 0.1288636  | 0.05005297  | 0.3363468  |            |
| 1.6473650    | 0.002936972 | 0           | 0          | 0.03018527  | 2.0699480  | 9.115756   |
| 0.05625      | 0.5641448   | 0.05651914  | 1.1925     | 0.07403378  | 0.07352179 | 0.1261121  |
| 2.9576060    | 2.069948    | 0.6268426   | 0.01769663 | 0           | 0.6249352  | 0.3684428  |
| 0.03101627   | 0.7748725   | 0           | 0.08874166 | 0.3312217   | 1.8029610  | 0.07059263 |
| 0.3917189    | 0.4026989   | 0.6475291   | 0.02636719 | 0.03152803  | 0.2257601  |            |



|                           |                                   |                           |                           |                    |                    |             |            |            |
|---------------------------|-----------------------------------|---------------------------|---------------------------|--------------------|--------------------|-------------|------------|------------|
| 0.04921875                | 1.2398240.8230021                 | 0.2847183                 | 0.0328125                 | 0.4638416          |                    |             |            |            |
| 0.2580401                 | 3.3999081.4747280.03508664        | 0                         | 0                         | 0                  | 0.6044776          | 1.405162    |            |            |
| 0.2139085                 | 0.02825957                        | 0.5475994                 | 0.2301136                 | 1.0222360          | 0.2883703          |             |            |            |
| 0.03299581                | 0.3702426                         | 1.2091540.4807413         | 0.1981331.1329931.955966  |                    |                    |             |            |            |
| 0.5952507                 | 0.07793356                        | 0.6040483                 | 1.1967640.1322295         | 0.2653730.0434816  |                    |             |            |            |
| 1.2931520                 | 0.1272442                         | 0.02515975                | 0.0577158                 | 0.01591981         | 0.0758833          |             |            |            |
| 0.1982770.4714524         | 1.5495250.3622232                 | 0.1607872                 | 0.1862765                 | 0.4248355          |                    |             |            |            |
| 0                         | 0                                 | 0.08115458                | 0.06026786                | 1.4502890.2150334  | 2.5455970          | 1.092715    |            |            |
| 1.0014950.1793955         | 0.08270129                        | 0.06490385                | 0.07457387                | 0.4321647          |                    |             |            |            |
| 0.3889894                 | 0.4193236                         | 0.4440790.1614540         | 1.1022030                 | 0.1420341          |                    |             |            |            |
| 0.2553134                 | 0.1112661                         | 0.03192568                | 1.6563184.4538940.7115496 | 0.7893965          |                    |             |            |            |
| 0.1969844                 | 0.1110893                         | 0.2060017                 | 0.1006747                 | 0.2473822          | 0                  | 0.002611459 |            |            |
| 0.3008177                 | 0.2297821                         | 0.07857539                | 0.08109268                | 0.1344877          | 1.260567           |             |            |            |
| 3.4650340.04841189        | 0.4057729                         | 0.03204114                | 0.1125715                 | 0.1373547          |                    |             |            |            |
| 0.08715033                | 0.3225256                         | 0                         | 0.0183329                 | 0.1712709          | 1.5612830.1368243  |             |            |            |
| 0.1654026                 | 0.14175                           | 0.2473304                 | 0.02976066                | 0.4796661          | 0.7388214          |             |            |            |
| 0.1114387                 | 0.02163462                        | 0.2310137                 | 0                         | 0.1536308          | 0.8286869          | 0.05019476  |            |            |
| 1.4880982.3216950.2580997 | 0.0199311                         | 0                         | 0.5519860.00768376        | 0.02375168         |                    |             |            |            |
| 1.8538730.03497409        | 0.4351363                         |                           |                           |                    |                    |             |            |            |
| TCGA-DK-A2I1              | 546                               | 0                         | 0                         | 0.1064515          | 0                  | 0.1956646   | 0.4773902  | 53.53087   |
| 0.1734088                 | 0.2351373                         | 0.2270829                 | 0                         | 0                  | 1.7007190.03335414 | 1.568386    |            |            |
| 0.08069059                | 0.1455840.02945633                | 0.09338719                | 0.2439310.09637666        | 0.1633735          |                    |             |            |            |
| 0.05114302                | 3.06491433.048520.1260310.1070165 | 0.1718605                 | 0.1786769                 |                    |                    |             |            |            |
| 0.4726163                 | 2.4666070.9069522                 | 0                         | 0.08020156                | 0.0263742          | 0.4872205          |             |            |            |
| 0.01326642                | 0.8624526                         | 0.2148666                 | 0.1974770.09837777        | 0.08168677         |                    |             |            |            |
| 0.06771403                | 0.1285562                         | 0.05756719                | 10.2255                   | 0.0394728          | 0.1405924          |             |            |            |
| 0.05407636                | 0.2005039                         | 0.1297378                 | 4.8226460.03310383        | 0.4155370.2420047  |                    |             |            |            |
| 0                         | 0.4985842                         | 0.2871593                 | 0.1064649                 | 2.3689160.04411086 | 0.04191055         |             |            |            |
| 0.5279410.0534677         | 0.1148884                         | 0.09955431                | 0.0746061                 | 0.4042893          |                    |             |            |            |
| 0.9244188                 | 0.05517305                        | 0.1000246                 | 0.08568414                | 0.09109108         | 0.3554721          |             |            |            |
| 1.26031                   | 0.1176289                         | 0.2322898                 | 0.05194095                | 0.2122415          | 0.02733438         | 0           |            |            |
| 0.8296713                 | 0                                 | 0.4270605                 | 0                         | 0.09654907         | 0.1471805          | 0           | 0.03213906 |            |
| 0.09048381                | 0                                 | 0.1121462                 | 0.0288660                 | 0.07617359         | 0.1889680.06416124 |             |            |            |
| 0.2990566                 | 0.8038425                         | 1.3352480.3626551         | 0                         | 0                  | 0.6612871          | 1.731454    |            |            |
| 0.8510133                 | 0                                 | 0.07129027                | 0.4585924                 | 0                  | 0.4257048          | 0           | 0          | 0.09418688 |
| 3.24863                   | 0.1649004                         | 0.08322803                | 0.01762231                | 0.1257317          | 0.4392782          |             |            |            |
| 0.5670205                 | 0.5840266                         | 0.1028825                 | 0.1357257                 | 0                  | 0.04162912         | 1.1453350   |            |            |
| 0.3770714                 | 0                                 | 0.8519306                 | 0                         | 0.8162863          | 0.1566872          | 0           | 1.52626    |            |
| 0.3374601                 | 0.01648388                        | 0.03267471                | 0.1231717                 | 0                  | 0.2929872          | 1.435658    |            |            |
| 0.03493929                | 0.02718697                        | 0.03090077                | 0.03794482                | 0.1128636          | 0.6143098          | 0           |            |            |
| 0                         | 0.2336999                         | 0                         | 0.1696571                 | 0                  | 0.03190659         | 0           | 0.5266968  | 0.1914172  |
| 0.02279631                | 0.02818585                        | 0.06267972                | 0.1718605                 | 0.3309223          | 0.9091021          | 0           |            |            |
| 1.0262190                 | 0.05081896                        | 0.1298970.1876150.3643375 | 0                         | 0.1064799          |                    |             |            |            |
| 0.06896811                | 0.3012062                         | 0.03778232                | 0.1256464                 | 0.2738590.3449836  |                    |             |            |            |

|              |             |             |            |            |            |            |
|--------------|-------------|-------------|------------|------------|------------|------------|
| 0.09017551   | 0.3202240   | 0.1151344   | 1.1401750  | 0.3490090  | 0.06335491 | 0.02693793 |
| 0.4201034    | 0.06279125  | 0.5567391   | 0.0783140  | 0.0495164  | 0.3271338  | 0.2557151  |
| 0.9344356    | 0.04117699  | 0.1292626   | 0.2673385  | 0.3227624  | 0.05613854 |            |
| 0.1577459    | 0           | 0.05577942  | 0          | 0.6651967  | 0.05823215 | 0.1767970  |
| 0.8954978    | 0.2861245   | 0.4602872   | 0.1928343  | 0.1045419  | 0.3611726  |            |
| 0.09807861   | 0.1659343   | 1.07502     | 0.03341732 | 0.03079292 | 0          | 0.2080394  |
| 0.1468404    | 0.02542412  | 0.03912271  | 0.1615043  | 0.06696145 | 0.01410419 |            |
| 0.3477380    | 0.09641717  | 0.03848275  | 0          | 0.1120987  | 0          | 0.06508826 |
| 0.1605856    |             |             |            |            |            |            |
| 0.06946591   | 0           | 0.2015610   | 0.3254080  | 0.01029425 | 0.4705158  | 0.1477751  |
| 0.06297582   | 0.06905809  | 0.02581469  | 0.2441356  | 0.04308753 | 0.1932366  |            |
| 0.03167745   | 0           | 0.62556     | 0.3248958  | 1.3095414  | 0.0669210  | 0.05303502 |
| 0.3374059    |             |             |            |            |            |            |
| 0.0523571    | 0           | 0.05356045  | 0          | 0.3431830  | 0.1559912  |            |
| TCGA-DK-A6B0 | 2330        | 0           | 0          | 0.05627703 | 0          | 0.07301697 |
| 0.04038059   |             |             |            |            |            |            |
| 72.261210    | 0.04583743  | 0.2008060   | 0.3361412  | 0          | 0.1170052  | 0.02883437 |
| 0.1763311    | 0.9754685   | 0.03554847  | 0.04198088 | 0.03114497 | 0          | 0.05731439 |
| 0.0548701    | 0.1295544   | 0           | 1.8819351  | 0.18260210 | 0.0545138  | 0.07071962 |
| 0.1211418    | 0.04722996  | 0           | 1.27545    | 0.0435884  | 0          | 0          |
| 0.1394308    |             |             |            |            |            |            |
| 0.08410633   | 0.04208083  | 0.3039647   | 0.2138205  | 0.09711523 | 0          | 0.06552177 |
| 0.03068394   | 0.2378704   | 0.03043366  | 13.495710  | 0.1982028  | 0.01633611 |            |
| 0.9539916    | 0.06858763  | 9.8802280   | 0.4393584  | 0.02326164 | 0.07013472 |            |
| 0.9957588    | 0.3036212   | 0.01289844  | 0.7773264  | 0          | 0.1329394  | 0.5875853  |
| 0            | 0.00189804  | 0.1543834   | 0.1183245  | 0.4885325  | 0          | 0.02333438 |
| 0.1551128    | 0.04878253  | 0.1733635   | 0.2391774  | 3.4727310  | 0.22387    | 0          |
| 0.01647557   | 0.1047240   | 0.01445069  | 0.02975412 | 0.2924112  | 0          | 0.1663578  |
| 0            |             |             |            |            |            |            |
| 0.05104196   | 0.1006939   | 0.08365845  | 0          | 0.04783547 | 0          | 0.03952507 |
| 0.03815099   | 0           | 0.002684679 | 0.1440426  | 0.0678394  | 0.0527001  | 0.1728179  |
| 0.6655595    | 0.003092298 | 0.1349916   | 0          | 0          | 0.5230608  | 1.1097520  |
| 0.1025046    |             |             |            |            |            |            |
| 0.06999303   | 0.4242717   | 0.02975412  | 0.3908842  | 0          | 0          | 0          |
| 3.444299     |             |             |            |            |            |            |
| 0.0435884    | 0.4399961   | 0.01397441  | 0          | 0.3096404  | 0.2468636  | 0.01484392 |
| 0.2175608    | 0           | 0.03114497  | 0.07787372 | 1.3310010  | 0.05309003 | 1.2922980  |
| 0.7313583    | 0           | 0.06639087  | 0.04321815 | 0          | 1.7679360  | 0.1529167  |
| 0.1394308    |             |             |            |            |            |            |
| 0.03454784   | 0.1953491   | 0           | 0.8260886  | 1.9466960  | 0          | 0          |
| 0.1591116    |             |             |            |            |            |            |
| 1.0103740    | 0.1190165   | 0.2516730   | 0.07175321 | 0          | 0.1012071  | 0          |
| 0.2784453    | 0.6724588   | 0.02410315  | 0.1192066  | 0.3976377  | 0.545138   |            |
| 0.3037533    | 0.1523882   | 0.1413321   | 0.3500157  | 0          | 0.0214929  | 0.06867178 |
| 0.4508418    | 0.05503196  | 0           | 0.05960331 | 0.03646091 | 0.05028527 | 0          |
| 0.1518278    | 0.6618478   | 0.4775045   | 0          | 0.1354326  | 0.04395973 | 0.9655213  |
| 0.3690165    | 0.1674671   | 0.02848219  | 0.1903657  | 0.1327817  | 0.1811246  |            |
| 0.3769784    | 0           | 0.2722942   | 0.4956864  | 0.01452947 | 0.04353754 | 0          |
| 0.04711069   | 0.02843877  | 0.0534211   | 0.2403723  | 0.04675648 | 0.1006079  | 0          |
| 0.1230828    | 0.06157041  | 0.07477288  | 0          | 0.2856549  | 0.1680706  | 1.095016   |
| 0.1699074    | 0.2210698   | 0.4604992   | 0.03111034 | 0.1949408  | 0.2004232  |            |
| 0.1766651    | 0.03255818  | 0           | 0.03024527 | 0.2422029  | 0.02688161 | 0          |
| 0.08538139   | 0.07080013  | 0.1491274   | 0.2925131  | 0.05097223 | 0.08137769 | 0          |

|              |            |            |            |            |            |            |             |           |
|--------------|------------|------------|------------|------------|------------|------------|-------------|-----------|
|              | 0.28446    | 0.07230944 | 0.0458797  | 0.02122393 | 0.1468963  | 0          | 0           | 0.2676042 |
|              | 0.07203025 | 0.01088438 | 0.09949779 | 0.08333148 | 0.05091872 | 0.2099238  |             |           |
|              | 0.2047092  | 0.3050640  | 0.2870128  | 0          | 0.0269593  | 0.5019297  | 0.1056988   |           |
|              | 1.3117386  | 1.667590   | 0.05607534 | 0          | 0          | 0.1162357  | 0.01618026  | 0         |
|              | 0.05063266 | 0.0549779  |            |            |            |            |             |           |
| TCGA-FD-A5BR | 813        | 0          | 0.08475262 | 0.1268861  | 0.06147275 | 0.1724685  |             |           |
|              | 0.2341154  | 47.4073    | 0.1181123  | 0.2587149  | 0.4021441  | 0.1166789  |             |           |
|              | 0.05024915 | 1.3272570  | 0.3180546  | 2.0108420  | 0.08244001 | 0.1502428  | 0.1605065   |           |
|              | 0.2385297  | 0.3692142  | 0.05049547 | 0.1947348  | 0.06966911 | 2.7042726  | 4.6737      |           |
|              | 0.03901923 | 0.2004506  | 0.6243076  | 0.06085024 | 0.9657259  | 0.9565285  |             |           |
|              | 0.3369511  | 0.08478252 | 0          | 0.6826323  | 0.4131267  | 0.1265044  | 0.4405756   |           |
|              | 0.3013089  | 0.2877795  | 0.04729914 | 0.1247070  | 0.2503734  | 0.1313434  |             |           |
|              | 0.03921019 | 11.129060  | 0.2688573  | 0.2872810  | 0.1157593  | 0.4097019  | 0.2209177   |           |
|              | 4.6936020  | 0.04509539 | 0.6096047  | 0.2847139  | 0.2710809  | 0.9181667  | 0           |           |
|              | 0.1042409  | 1.50224    | 0          | 0          | 0.5677758  | 0.1092538  | 0.2029683   | 0.1175347 |
|              | 0.05081574 | 0.4720624  | 0.5475135  | 0.05261129 | 0.1635091  | 0.2244662  |             |           |
|              | 0.1985408  | 0.6163037  | 5.4626920  | 0.3204779  | 0.1186630  | 0.2901     | 0.1734744   |           |
|              | 0.07447202 | 0          | 0.3265057  | 0.1288785  | 0.2449513  | 0          | 0.06576154  |           |
|              | 0.1945983  | 0          | 0.08756227 | 0.4930430  | 0.0509234  | 0.05898367 | 0.05300076  |           |
|              | 0.2870881  | 0.3591907  | 0          | 0.06789786 | 0.7336681  | 1.3771890  | 0.003984062 |           |
|              | 0.06956829 | 0          | 1.1055671  | 1.1793290  | 0.6569282  | 0.1320651  | 0.4439521   |           |
|              | 0.2655032  | 0.07666936 | 0.6256950  | 0.03347611 | 0.0498669  | 0.1283052  |             |           |
|              | 2.5288090  | 0.3401299  | 0.04201021 | 0.1141845  | 0.0498669  | 0.2726183  |             |           |
|              | 0.4475165  | 0          | 0.09244555 | 0.04012662 | 0.1526778  | 2.2630240  | 0.0273601   |           |
|              | 0.7616369  | 0          | 2.2039510  | 0.07153525 | 1.6251990  | 0.1392037  | 0.06676623  |           |
|              | 0.9534880  | 0.3940302  | 0.1886221  | 0.04451082 | 0.2516842  | 0.2916971  |             |           |
|              | 0.9312781  | 0.6270220  | 0.0740704  | 0.0841886  | 0.2584499  | 0.2562457  |             |           |
|              | 1.6736760  | 0.1533387  | 0.1886551  | 0.2497231  | 0.3235594  | 0.06039157 |             |           |
|              | 0.2173223  | 0.2237974  | 1.4349760  | 0.4920724  | 0.3726487  | 0          | 0.2561546   |           |
|              | 0.5462692  | 0.7876544  | 0.6569646  | 0.1820897  | 0.8117171  | 0          | 0.2492196   |           |
|              | 0.1769510  | 0.3717482  | 0.1772555  | 0.04315232 | 0.1365188  | 0.2035609  |             |           |
|              | 0.4103154  | 0.05146862 | 0.3300955  | 0.2131782  | 0.2819704  | 0.1637877  |             |           |
|              | 0.08724444 | 0.1611974  | 1.0471760  | 0.2641302  | 0.2157616  | 0.03669595 |             |           |
|              | 0.4087729  | 0.3849157  | 0.2916971  | 1.1905380  | 0.02248442 | 0.6605511  |             |           |
|              | 1.0276191  | 0.0295730  | 0.04206974 | 0.2201085  | 0.4046438  | 0.10992    | 0.07647421  |           |
|              | 0.2148879  | 0.1204804  | 0.09162897 | 0          | 0.4304251  | 0.07932622 | 0.04816802  |           |
|              | 0.2078027  | 0.4652099  | 0.4330783  | 0.6270220  | 0.7442793  | 0.03164693 |             |           |
|              | 0.6077697  | 0.06680335 | 0.02511582 | 4.1739952  | 9.134360   | 0.1258421  | 0           |           |
|              | 0.3329947  | 0.3920627  | 0.06926756 | 0.05329455 | 0          | 0.04560881 | 0.2881996   |           |
|              | 0.3873372  | 0.2626868  | 0.2096911  | 0.1303934  | 0.09162329 | 0          | 0.1994982   |           |
|              | 0.2187563  | 0.2838879  | 0          | 0.01056056 | 0.6402991  | 0.06186832 | 0.04206974  |           |
|              | 0.7691470  | 0.1476238  | 0.1362519  | 0.1763883  | 0.5626533  | 0.1511688  |             |           |
|              | 0.08804339 | 0.5390046  | 0.8630465  | 0.06946776 | 0.4774533  | 0.06809021 |             |           |
|              | 1.03279    | 4.7384540  | 0.06113163 | 0.2703695  | 0.07132298 | 0.4492681  | 0.1563476   |           |

|              |            |            |            |             |            |             |            |
|--------------|------------|------------|------------|-------------|------------|-------------|------------|
| 0            | 0.2901712  | 0.1067469  | 0.1652759  |             |            |             |            |
| TCGA-KQ-A41Q | 361        | 0          | 0.1767637  | 0.4983463   | 0.2331095  | 0.2972792   |            |
|              | 0.04932133 | 15.644730  | 0.2102287  | 0.2932619   | 0.2212277  | 0.03175812  |            |
|              | 0.2209169  | 0.5168953  | 5.5445590  | 0.4428770   | 0.03418395 | 0.07608165  | 0.271357   |
|              | 0.03500223 | 0.1053155  | 0.3692249  | 0.1320954   | 3.26817765 | 2.240420    | 0.1109730  |
| 0            | 0.4038106  | 0          | 0.7440475  | 0.1597181   | 0.1205632  | 0.1035748   |            |
|              | 0.5790280  | 0.1605132  | 0.1199287  | 0.3712660   | 0.4243895  | 0.20165     | 0.1943089  |
|              | 0.09821747 | 0.1499109  | 0.1660215  | 0           | 4.5711430  | 0.1529292   | 0.03026089 |
|              | 0.01995311 | 3.1072441  | 1.1309454  | 0.0816640   | 0.1710053  | 0.5366375   | 0.09944213 |
|              | 0.9181355  | 0          | 0.05155954 | 2.9010530   | 0.05696613 | 0.1082492   | 0.2511892  |
|              | 0.01622802 | 0.2871342  | 0.04817432 | 0.3356433   | 0.05190536 | 0.02137566  |            |
|              | 0.1205632  | 0.1957745  | 0.6234807  | 0.9598689   | 11.146620  | 0.06076388  |            |
|              | 0.0499977  | 0          | 0.2375492  | 0.03530047  | 0.03634203 | 0.8095501   | 0.1221794  |
|              | 0.1161093  | 0          | 0.1558581  | 0.07267515  | 0          | 0.04150538  | 0.8179752  |
|              | 0.04827638 | 0.08387652 | 0          | 0.003279098 | 0.2894419  | 0.2900094   | 0          |
|              | 0.1522557  | 0.9114581  | 0.0491006  | 0.09892816  | 0          | 0.1164555   | 0.6388725  |
|              | 1.9049770  | 0.1252003  | 0.1775568  | 0.3405383   | 0.07268406 | 1.14294     | 0.2538881  |
|              | 0.0472748  | 0.4865435  | 2.31668    | 0.2661969   | 0.4836747  | 0.005689501 |            |
|              | 0.2706230  | 0.4727480  | 0.5168950  | 0.1450443   | 0.5978953  | 0           | 0.1521633  |
|              | 0.3101604  | 1.1593110  | 0.03890686 | 0.8563811   | 0.6732361  | 0.6813225   | 0.1695421  |
|              | 0.1216359  | 0.4222972  | 0          | 1.0294710   | 0.3112903  | 0.1404994   | 0.1687885  |
|              | 0.1590677  | 0.05530693 | 0.2102071  | 0.7076538   | 0.09024338 | 0.0351101   | 0          |
| 0            | 0.3886815  | 0.1322231  | 0.22924    | 0           | 0.8048195  | 0           | 0.1752804  |
|              | 0.1145048  | 0.1236155  | 0.2545972  | 0.2040578   | 0.4704815  | 0.02943986  |            |
|              | 0.1820004  | 1.9022442  | 1.1454780  | 0.2958670   | 0.2076051  | 0.3884055   | 0.9832803  |
|              | 0.2267309  | 0.2100134  | 0.02795884 | 0.2202654   | 0.20165    | 0.1636370   | 0.03235563 |
| 0            | 0.06141901 | 0.04879326 | 0.2433955  | 0.4547186   | 0.1377070  | 0.4270034   |            |
|              | 0.1654189  | 0.2271624  | 1.6923270  | 0.3505608   | 0          | 0           | 0.4459982  |
|              | 0.05530693 | 0.9714284  | 0.02131567 | 0.7250916   | 0.3687663  | 0.2484504   |            |
|              | 0.5051839  | 0.08346686 | 0.9590258  | 0.5210317   | 0.2392469  | 0.7968967   |            |
|              | 0.05710891 | 0.1970377  | 0          | 1.07382     | 0.1504056  | 0.1369927   | 0.3283351  |
|              | 0.1685708  | 0.3284534  | 0.7925723  | 0.5395699   | 0.1500096  | 0.6859257   |            |
|              | 0.2279912  | 0.0238103  | 0.03353415 | 0.04315616  | 0.1193008  | 0           | 0.03022521 |
|              | 0.5916589  | 0.2955016  | 0.05052429 | 0.05214291  | 0.1729522  | 0.7559055   |            |
|              | 1.2604010  | 0.06225807 | 0.1242446  | 0           | 0.1737214  | 0           | 0.2101425  |
|              | 0.07776947 | 0.2691313  | 0          | 0           | 2.9416940  | 0.05865239  | 0.3057692  |
|              | 0          | 0.1653958  | 0.06697677 | 0.1672196   | 0.5667443  | 0.2866221   | 0.08346686 |
|              | 0.04090925 | 0.2634272  | 0.4812829  | 0           | 1.5576685  | 0.5778630   | 0.08956525 |
|              | 0.1025262  | 0.1352312  | 0.2129575  | 0.009881376 | 0.06108969 | 0.1069787   | 0          |
|              | 0.246219   |            |            |             |            |             |            |
| TCGA-DK-A1AF | 536        | 0          | 0.05071222 | 0.1518460   | 0.1594871  | 0.1089544   |            |
|              | 27.744470  | 0.1766829  | 0.4054378  | 0.1480771   | 0.6283392  | 0.02004458  |            |
|              | 3.8314240  | 0.2446841  | 0.3007     |             |            |             |            |

|              |            |            |            |            |            |            |
|--------------|------------|------------|------------|------------|------------|------------|
| 0.2616889    | 0.1400843  | 0.1092303  | 0.5136423  | 0.3081854  | 1.176097   |            |
| 0.07609516   | 0.8280537  | 0.4299547  | 0.1904630  | 0.07569466 | 0.3222033  |            |
| 0.1493831    | 0.1347609  | 0.08962208 | 0.1446464  | 0.08673346 | 0.02619669 |            |
| 0.3284631    | 0.9379980  | 0.03217446 | 0.07639833 | 0.2770610  | 0.3268633  | 0.4758745  |
| 2.9116640    | 0.1349154  | 2.1364540  | 0.7262723  | 0.05406761 | 0.2634063  | 0.05201441 |
| 0.1120909    | 0.2330414  | 0.1438199  | 0.06832297 | 0.09059518 | 0.2832815  |            |
| 0.1419323    | 0.04057359 | 0.1824353  | 0.1176922  | 3.5709260  | 0.04047463 |            |
| 0.1521903    | 0.1772901  | 0.04454926 | 1.3960532  | 0.0545690  | 0.1150559  | 0.2682323  |
| 0.06350597   | 0.1268659  | 0.3676263  | 0.04587555 | 0.1502820  | 0.1927880  | 0.2381730  |
| 0.3147904    | 0.3422602  | 0.1289864  | 0.02619669 | 0.1106307  | 0.2514333  |            |
| 0.06094061   | 0.1117618  | 0.07928327 | 0.4429047  | 0.3940270  | 0.1307453  |            |
| 0.2031354    | 0.8932774  | 0.8395970  | 0.1382654  | 0.1873196  | 0.03126518 |            |
| 0.5390182    | 0.4368360  | 0.1618551  | 0.2897470  | 0.1950803  | 0.1308303  | 0.1146889  |
| 0.5844108    | 0.1402143  | 0.08951443 | 0          | 0.8220356  | 0          | 0.2713582  |
| 0.1687774    | 0.1024845  | 0.08951443 | 0.05437423 | 2.0071610  | 0.1677199  |            |
| 0.05531533   | 0.09603997 | 0.1252877  | 0.9167464  | 0.05729875 | 0.7842792  | 0          |
| 0.9301306    | 0.06420529 | 0.5885866  | 0.5386303  | 0.03994996 | 0.6973084  |            |
| 0.8251959    | 0.1236120  | 0.3728663  | 0.1756962  | 0.1745387  | 0.2653503  |            |
| 0.5717062    | 0          | 0.04432045 | 0.3274357  | 0.4330060  | 0.09199564 | 0.1947271  |
| 0.0289376    | 0.0917511  | 0.2857348  | 0          | 0.3318920  | 0.2168138  | 0.05201441 |
| 1.6743210    | 0.7776086  | 0.1858138  | 0.1378465  | 0.2299074  | 0.3268633  |            |
| 0.4535127    | 0.7048664  | 0.4085791  | 0.8364757  | 0.03577608 | 0.2568212  |            |
| 0.2999923    | 0.1668282  | 0.04242473 | 0.1032818  | 0.2961147  | 0.08432434 |            |
| 1.5118530    | 0.1609378  | 0.5421147  | 0.2198455  | 0.02450083 | 0.07830482 |            |
| 0.02867534   | 0.2985734  | 0.6005664  | 0.1032818  | 0.5708881  | 0.6632230  | 0.2559072  |
| 0.3490773    | 0.7478065  | 0.05381472 | 0.2515193  | 0.4689778  | 3.584295   |            |
| 0.1510360    | 0.1053625  | 0.5689843  | 0.3946276  | 0.07778993 | 0.2117778  | 0          |
| 0.05616396   | 0.05064079 | 0.3524332  | 0.0474653  | 0.2305729  | 0.08289329 |            |
| 1.6961460    | 0.6737507  | 0.3439171  | 0.0740640  | 0.1041487  | 0.4069556  | 0.0479666  |
| 0.2705076    | 9.2937890  | 0.3541019  | 0.0501989  | 0.1892366  | 0.2077280  | 0.2728939  |
| 0.1450632    | 0.2232237  | 0.2303750  | 0.1910321  | 0.7185244  | 0.5747156  |            |
| 0.5501306    | 0.3136747  | 0.07802162 | 0.05482332 | 0.1114883  | 0.03094802 |            |
| 0.06544703   | 0.05662199 | 0.02976096 | 0.09478461 | 1.3556790  | 0.1665867  |            |
| 0.03356356   | 0.2301118  | 0.06424114 | 0.1690933  | 0.3049018  | 0.2525001  |            |
| 0.03618109   | 0.2282855  | 0.2025103  | 1.0069970  | 0.02078322 | 0.5677575  |            |
| 0.3259373    | 0.3932574  | 7.9405     | 0.02660252 | 0.2750211  | 0.08535303 |            |
| 0.1792148    | 0.1184986  | 0.0963940  | 0.05787519 | 0.01774239 | 0.04238306 |            |
| TCGA-LT-A5Z6 | 474        | 0          | 0.7761814  | 0.2075085  | 0.1919249  | 0.7505894  |
| 35.285310    | 0.07692734 | 0.9014129  | 0.2428564  | 0.6798287  | 0.08786781 |            |
| 0.7565734    | 1.7657090  | 0.4671098  | 0.02501734 | 0.3758395  | 0.01654926 | 0          |
| 0.06306103   | 0.02895163 | 0.07250495 | 7.09566460 | 0.575580   | 0.2517664  | 0.01896452 |
| 0            | 0.8865795  | 0          | 3.9818540  | 0.1168888  | 0.7058683  | 0.07580063 |
| 0.5850040    | 0.3009228  | 0.5094543  | 0.8242504  | 0.1823003  | 0          | 0.1078199  |
| 0.1508532    | 1.4580230  | 24.127180  | 0.8394030  | 0.1328776  | 0.1752309  | 0.3553155  |

|              |            |            |             |             |             |             |           |
|--------------|------------|------------|-------------|-------------|-------------|-------------|-----------|
| 5.1959667    | 9.141840   | 5.162407   | 4.078403    | 0.04678468  | 0.6582686   | 0.8508234   | 0         |
| 0.02515571   | 1.3896780  | 0.2376647  | 0.8272415   | 0           | 0.005089879 | 0.2775697   |           |
| 0.5288416    | 1.2281940  | 1.709399   | 0.007821829 | 0.5577620   | 1.1308177   | 0.7231779   |           |
| 4.8104258    | 1.756390   | 3.335228   | 0.06860726  | 0.01472723  | 0.2808331   | 0.116255    |           |
| 0.03989507   | 0.9932496  | 0.8718089  | 0.6373047   | 0           | 0.3079725   | 0.2270671   |           |
| 0.1121713    | 1.5491490  | 5.131120   | 0.1059924   | 0.3683074   | 0.2482115   |             |           |
| 0.007199369  | 0.7227019  | 0.2274019  | 0           | 0.2507119   | 2.7312810   | 0.008292461 | 0         |
| 0.2718936    | 0.08522728 | 2.8637763  | 3.781250    | 0.04581357  | 0.1443822   | 0.4876064   |           |
| 0.1595803    | 2.6205360  | 1.741936   | 0           | 0.1780371   | 3.6312990   | 1.168888    | 1.12092   |
| 0.03122872   | 0.1188323  | 0.3113802  | 1.1821460   | 0.05572866  | 2.2607590   |             |           |
| 0.6263992    | 0.2587677  | 3.5400220  | 4.982910    | 0.2765019   | 1.19386     | 0.9917039   | 0         |
| 0.5341112    | 0.2317919  | 0.06948391 | 0.5788412   | 0.7517931   | 0.5094448   | 0           |           |
| 0.6984770    | 5.464269   | 0.3692134  | 1.3361630   | 0           | 0           | 0           | 2.2934143 |
| 0.2013216    | 0.03989507 | 0.4478875  | 0.06497197  | 0.3848340   | 5.656479    |             |           |
| 0.5880374    | 0          | 1.5680554  | 2.456310    | 0.2262267   | 0.1198764   | 0.6664531   |           |
| 3.4922430    | 0.8609589  | 0.0707282  | 3.3162782   | 8.627890    | 9.9333660   | 2.737730    | 1.227691  |
| 2.6598       | 0.1106823  | 0.5838146  | 0.03551893  | 0.0488877   | 0.2921695   | 0           |           |
| 0.6107233    | 0.4991749  | 0.5068645  | 0.2556819   | 0.5901719   | 0.5531509   |             |           |
| 1.4335630    | 2.199051   | 0.08981762 | 0           | 0.08508234  | 1.0237130   | 4.249987    |           |
| 0.7150439    | 0.04679927 | 0.9867538  | 0.5558713   | 0.3506665   | 0.554574    |             |           |
| 0.09162714   | 1.5370680  | 3.431827   | 0.5252745   | 0.6182844   | 0.5015380   | 2.395596    |           |
| 0            | 1.5795970  | 0.08255514 | 0.05012867  | 0.5046094   | 0.1570785   | 0.4957771   |           |
| 0.7613024    | 6.474481   | 5.314821   | 6.113910    | 0.2502811   | 0.2875196   | 0.0441752   | 0         |
| 0.7857866    | 0          | 0.02580685 | 0.3580596   | 0           | 0.1663916   | 0.1144815   |           |
| 0.1423959    | 1.3596852  | 1.081230   | 0.2182265   | 0.0904673   | 0.4767638   | 0           |           |
| 0.1922395    | 0.2561182  | 0          | 0           | 0           | 10.097950   | 0.03219332  | 0.1167524 |
| 0.2668182    | 0.6145311  | 0.1470497  | 0.3834533   | 1.6468750   | 1.573221    |             |           |
| 0.06108476   | 0.8479393  | 0          | 0.2168862   | 1.9120740   | 1.062927    | 1.709956    |           |
| 3.8139590    | 4.222051   | 0.0844124  | 0           | 0.8571847   | 0.07593211  | 0.03353111  |           |
| 1.2247060    | 0.1474315  |            |             |             |             |             |           |
| TCGA-GC-A4ZW | 15         | 0          | 0.06725237  | 0.08989806  | 0           | 0.1088629   | 0         |
| 24.2555      | 0          |            |             |             |             |             |           |
| 0.09775896   | 0.1227334  | 0.3471985  | 0           | 0.08039668  | 0           | 0.3116466   |           |
| 0.2180576    | 0.0447074  | 0.1592051  | 0.1340709   | 0.1098662   | 0.02003442  |             |           |
| 0.02759371   | 0.06910425 | 2.469582   | 14.090530   | 1.780332    | 0.03615006  | 0           |           |
| 0.06035687   | 0          | 1.8488910  | 1.671096    | 0           | 0           | 0.2494570   | 1.007649  |
| 0.07170215   |            |            |             |             |             |             |           |
| 0.3398916    | 0.09392931 | 0.08687494 | 0.04691564  | 0.1141809   | 0           | 0.1737047   |           |
| 0            | 7.1257190  | 1.066710   | 4.432583    | 0.01043825  | 0.4063801   | 0.08765061  | 1.90357   |
| 0.04472977   | 0.08638031 | 0.07431722 | 0           | 0.3493182   | 0           | 0.004495468 |           |
| 2.4834340    | 0.05662937 | 0.2628138  | 0           | 0.002425574 | 0.08519435  | 0           |           |
| 0.6243133    | 0          | 0          | 0.0991121   | 0.008905852 | 0.1107737   | 1.1789490   | 7.740573  |
| 0.03178795   | 0.07846725 | 0          | 0.07647463  | 0.03693411  | 0.03802387  | 0.1743853   |           |
| 0            | 0.3644479  | 0.2314657  | 0.06522836  | 0.0701893   | 0.1069102   | 0.08685233  |           |
| 0.1833920    | 0          | 0.05850544 | 0           | 0.01372339  | 0.2968987   | 0           | 0.3367368 |
| 0.2570552    | 0.8247685  | 0          | 0.03450212  | 0           | 0.04061493  | 1.2811730   | 3.449657  |

|              |            |            |            |             |            |            |            |           |
|--------------|------------|------------|------------|-------------|------------|------------|------------|-----------|
| 0.04366477   | 0.2476983  | 0.3562977  | 0.07604774 | 0.7265818   | 0.06640937 |            |            |           |
| 0.8903265    | 0          | 3.9674650  | 0.7872017  | 0.0059528   | 0          | 0.6924762  |            |           |
| 0.1352040    | 0.01896958 | 0.2085216  | 0          | 0           | 0.06922966 | 2.2586180  | 0.01356913 |           |
| 3.5137750    | 0.3792881  | 0.1372902  | 0.03547763 | 0.04242165  | 0.01841001 | 0          |            |           |
| 1.9834630    | 0.06513925 | 0.1024556  | 0          | 0.2912509   | 0.05786642 | 0.3958832  |            |           |
| 0.4738577    | 0          | 0          | 0.0417530  | 0.1525008   | 0.1383422  | 0          | 0          | 0.4151848 |
| 0.2476983    | 0          | 0          | 0.1724482  | 0           | 0.6405036  | 0.8134713  | 0.03080228 |           |
| 0.3427615    | 1.0586570  | 0.5418401  | 0.1081     | 0.007490093 | 0.4063801  | 0.8051358  |            |           |
| 0.05930588   | 0.06866638 | 0.08775816 | 0.6337618  | 0.2109820   | 0.04231623 |            |            |           |
| 0.1242526    | 0.06426136 | 0          | 0.3516724  | 0.3700372   | 0.4915663  | 0.08122987 |            |           |
| 0.08653708   | 0.06914182 | 1.3454110  | 0.4715795  | 0.04280245  | 0.03639842 | 0          |            |           |
| 0.2545299    | 0          | 0.7872571  | 0          | 0.2915463   | 0.1957954  | 0.05570319 |            |           |
| 0.08345729   | 0.08732954 | 0.02006815 | 0.07268587 | 0.03034167  | 0.1441867  |            |            |           |
| 0.1195036    | 0.2039395  | 0          | 0.2921136  | 0.3147322   | 0          | 0.06870595 |            |           |
| 0.06357591   | 0.7732205  | 0.3627973  | 0.5211140  | 0.1412565   | 0.3301278  |            |            |           |
| 0.02650469   | 0.02491219 | 0.1859560  | 0.04160727 | 0           | 0.02108265 | 0.1031733  |            |           |
| 0.06870595   | 0          | 0.3273359  | 0.1809561  | 0.2286903   | 0.3348742  | 0          |            |           |
| 0.05199774   | 0          | 0.2726413  | 0          | 0.0439735   | 0.1084913  | 0          | 0.03700098 |           |
| 0.01047494   | 0.9770888  | 0          | 0.05563819 | 0.6357591   | 0.09318077 | 0.0100109  |            |           |
| 0.1166388    | 0.3662475  | 0          | 0          | 0.2735339   | 0.0856049  | 0          | 0.2877461  | 0         |
| 1.1175454    | 7.142350   | 0.09371015 | 0.0804532  | 0           | 0.1485418  | 0.05169333 | 0          |           |
| 0.7355362    | 0.04117611 | 0.08196796 |            |             |            |            |            |           |
| TCGA-K4-A4AB | 76         | 0          | 0.2308706  | 0.08229626  | 0.05581833 | 0.09965739 |            |           |
| 0.3543014    | 21.104930  | 0.1608720  | 0.2349177  | 0.05617753  | 0          | 0.01520904 |            |           |
| 1.3554360    | 0.1237711  | 0.4279406  | 0.1330791  | 0.4065409   | 0.1457427  |            |            |           |
| 0.7508424    | 0.6034554  | 0.07336124 | 0.02526038 | 0.1265216   | 1.116465   |            |            |           |
| 21.602570    | 0.04251617 | 0.2647456  | 0.7086029  | 0.05525308  | 1.5589261  | 0.291682   |            |           |
| 0.4589363    | 0.03849201 | 0.06613627 | 0.4567258  | 0.1844883   | 0.08204875 |            |            |           |
| 0.1333501    | 0.1876072  | 0.09657066 | 0.06442267 | 0.1271729   | 0.0837581  |            |            |           |
| 0.07950808   | 0.1780177  | 7.8499130  | 0.1159361  | 0.01911118  | 0.3720165  |            |            |           |
| 0.4011943    | 3.1980370  | 0.1637896  | 0.6721458  | 0.5986899   | 0          | 0.1142071  |            |           |
| 0.4735979    | 0.09053727 | 0.4546868  | 0.05456242 | 0           | 0.03437003 | 0.1322725  |            |           |
| 0.1931806    | 0.09030455 | 0.09228316 | 0.7858417  | 0.5468671   | 0.0204737  |            |            |           |
| 0.1237243    | 0.3424164  | 0.2140807  | 0.7195045  | 0.1417206   | 0.2036997  |            |            |           |
| 0.1316921    | 0.1092212  | 0.2275257  | 0.08452738 | 0           | 0.1368337  | 0.3510719  |            |           |
| 0.4170376    | 0.02354366 | 0.1492816  | 0.2141803  | 0.3914793   | 0.03975404 |            |            |           |
| 0.05596146   | 0.07631108 | 0          | 0.0267791  | 0.09625124  | 0.1319109  | 0.3750742  |            |           |
| 0.1587270    | 0.3082623  | 1.2461941  | 0.4156740  | 0.1410863   | 0.03158461 | 0          | 2.528276   |           |
| 1.4278020    | 0.8070326  | 0.07994494 | 0.1826621  | 0.6523382   | 0.03480856 |            |            |           |
| 0.5681420    | 0.1215876  | 0.04528002 | 0.03883446 | 1.2695350   | 0.1019858  | 0.6691618  |            |           |
| 0.01089886   | 0          | 0.1811201  | 0.1650281  | 1.50038     | 0.2545186  | 0          | 0          |           |
| 0.1505170    | 0.8551303  | 0.03726517 | 0.5629137  | 0           | 0.9571083  | 0.03247763 |            |           |
| 3.4951020    | 0.04213314 | 0          | 1.0461560  | 0.05963106  | 0.08155818 | 0          | 0.1904448  |           |
| 0.1589197    | 0.4832096  | 0.6777941  | 0          | 0.1008858   | 0.07644472 | 0          |            |           |

|              |            |            |            |            |            |            |            |
|--------------|------------|------------|------------|------------|------------|------------|------------|
| 0.04653511   | 0.5065757  | 0          | 0.1044257  | 0.7440938  | 1.7006470  | 0.08394219 |            |
| 0.2193464    | 0.07893298 | 0          | 0.8469391  | 1.1685810  | 0.2819763  | 0.1045925  |            |
| 0.6202478    | 0.6377426  | 0.3688474  | 0.8570911  | 0.2480110  | 0.2866319  |            |            |
| 0.1085819    | 0.1508638  | 0.0535582  | 0.1054856  | 0.03219022 | 0          | 0.07747593 |            |
| 1.0805850    | 0.4117919  | 0.04673441 | 0.03330361 | 0.2419620  | 0.3801719  | 0.07436105 |            |
| 0.07921949   | 0.1265904  | 0.6253938  | 0.1439009  | 0.1175492  | 0.06664113 |            |            |
| 0.8908150    | 0.07766893 | 0.1059464  | 0.8013604  | 0          | 0.1521004  | 0.2003258  |            |
| 0.8328843    | 0.1400669  | 0          | 0.1102271  | 0.1996186  | 0.04166396 | 0.1779053  |            |
| 0.1093983    | 0.0710250  | 0.3291230  | 0.3601480  | 0.06289616 | 0.8786310  | 0.5112155  |            |
| 0.1897823    | 0.2782783  | 0.05747194 | 0.5518655  | 0          | 0.09122244 | 1.728011   |            |
| 0.1653407    | 0.1523558  | 0          | 0.4342477  | 0.2106938  | 0          | 0          | 0.09988544 |
| 0.0414136    | 0.2442443  | 0.1615960  | 0.1192621  | 0.2142036  | 0.07893298 |            |            |
| 0.08319556   | 0          | 0.08051018 | 0.04965863 | 0.08592507 | 0          | 0.06712424 |            |
| 0.4919563    | 0.02808876 | 0.02546671 | 0.1163998  | 0.0974873  | 0.07789722 |            |            |
| 0.3167681    | 0.1756215  | 0          | 0          | 0.1650389  | 1.91997    | 0          | 1.3006080  |
| 3.4101519    | 5.151140   | 0.06560106 | 0.3682503  | 0.06476252 | 0          | 0.06625099 |            |
| 0.1170240    | 0.4830476  | 0.08615828 | 0.01071953 |            |            |            |            |
| TCGA-DK-AA74 | 1708       | 0          | 0.02600026 | 0          | 0          | 0.04809963 | 0.3990083  |
| 53.601310    | 0.09058567 | 0.09448582 | 0.5219460  | 0          | 1.8390150  | 0.9638789  | 0          |
| 0.4102119    | 0.1846496  | 0.02439191 | 0.2265337  | 0.06196364 | 0          | 0.5343242  |            |
| 0.7696822    | 26.135820  | 0.09576199 | 0.3354211  | 0.2394050  | 0.09333764 | 0          |            |
| 0.8276572    | 1.8089620  | 0.1117223  | 0.3306580  | 0.05194191 | 0          | 0.6007066  |            |
| 0.02641001   | 0.4414224  | 0.2176552  | 0.04708604 | 0          | 0.0671555  | 0.3007208  |            |
| 0.4108937    | 0          | 0.09792395 | 0.2421303  | 0.4189587  | 0.06777273 | 3.5832     | 0          |
| 0.1335810    | 0.4597053  | 0          | 0.5209031  | 0.06666974 | 0.1436731  | 0.2560303  | 0          |
| 0            | 0.05806042 | 0.2234446  | 0.1012764  | 0.09014271 | 0          | 0.6034103  |            |
| 0.6718609    | 0.08069999 | 0.05573449 | 0.04131681 | 0.07613499 | 0.135049   |            |            |
| 0.5586116    | 0          | 0.2224641  | 0.0759725  | 0.02956565 | 0.14279    | 0          | 0.1155748  |
| 0            | 0.4696607  | 0          | 0          | 0.1628142  | 0          | 0          | 0.09453427 |
| 0.0406487    | 0.07958347 | 0.0642786  | 0.06703339 | 0.4165917  | 0.5542852  |            |            |
| 0.8370116    | 0.3483337  | 0.1600653  | 0          | 0.06280812 | 1.2059750  | 0.1778217  |            |
| 0.1350490    | 0.05320111 | 0.1197803  | 0          | 0.3043103  | 0          | 0          | 0          |
| 0.2608611    | 0.02761675 | 0          | 0.1529808  | 0          | 0.9856597  | 0.1074880  | 0.1418014  |
| 0            | 0.04014704 | 0.3449672  | 0          | 0.7607327  | 0          | 0.9962217  | 0.1097273  |
| 0.2624083    | 0.02846978 | 0          | 0.6906471  | 0          | 0.07577579 | 0          | 0          |
| 1.2594780    | 0.2840398  | 0.1291361  | 0.2378604  | 0          | 0.7131212  | 0.07418182 |            |
| 0.05880122   | 0.09947315 | 0.3830480  | 0.1418014  | 0          | 0.06666974 | 0          | 1.100548   |
| 0.2322417    | 0.04763355 | 0          | 0.3929133  | 0.2394050  | 0.08358451 | 1.4478620  |            |
| 0.06917142   | 0          | 0          | 0          | 0.2851106  | 0.1087562  | 0          | 0.4711612  |
| 0.3975026    | 0.07894725 | 0.1312709  | 0          | 0.3276606  | 0          | 0          | 0.03341342 |
| 0.9810004    | 0.4861763  | 0.1323819  | 0.1125752  | 0.6270130  | 0.7158906  |            |            |
| 0.3815849    | 0          | 0.1308936  | 0.1692027  | 0.8614104  | 0.04302026 | 0          |            |
| 0.6517136    | 0.1124036  | 0.03519093 | 0.1454182  | 0          | 0.0479923  | 0          |            |
| 0.3127383    | 0          | 0.0738845  | 0          | 0.9197270  | 0.06642949 | 0.4007431  | 0.268622   |



|              |             |            |             |             |            |             |
|--------------|-------------|------------|-------------|-------------|------------|-------------|
| 0.04854295   | 1.1098240   | 0.1926247  | 0.4883227   | 0.2793058   | 0          | 0           |
| 0.2282198    | 0.1350040   | 0.4087402  | 0.08436697  | 0.8395074   | 0          | 0.1806486   |
| 0.2014665    | 0           | 0          | 0.04684672  | 0           | 0          | 0           |
| 0            | 0.2264389   | 0.02322173 | 0.04809963  | 0.02697028  | 0.09275061 | 0           |
| 0.0865229    | 0.7281006   | 0          | 0.3800863   | 0.05222148  | 1.4401717  | 2.463140    |
| 1.7003410    | 1.1094017   | 0.1148547  | 0.1438922   | 0           | 0.02472727 | 0.009096562 |
| 0.03621647   |             |            |             |             |            |             |
| TCGA-G2-A2EO | 1804        | 1          | 0.01499186  | 0.04809607  | 0.2174779  | 0.01386723  |
| 0.06902098   | 119.33360   | 0.05223209 | 0.1416504   | 0.2462370   | 0          | 0.9827222   |
| 0.8614540    | 0.04050774  | 0.3800425  | 0.07097984  | 0.1125158   | 0.3592059  |             |
| 0.2054389    | 0.0492094   | 0          | 2.67297699  | 6.64770     | 0.2139650  | 0.1128197   |
| 0.05381889   | 0.09490384  | 1.0629231  | 2.914020    | 0.03749288  | 0.06441958 | 0.1906588   |
| 0.0419299    | 0.01598381  | 0.4329625  | 0.09898281  | 0.1770616   | 0.3974196  |             |
| 0.07635941   | 0.06992915  | 0.03872215 | 0.1040381   | 6.4615380   | 0.2377904  |             |
| 0.2258535    | 0.01861511  | 0.3019668  | 0.2344683   | 13.521750   | 0.07976908 |             |
| 0.1925585    | 0.1325340   | 0.4449704  | 0           | 0.09887656  | 2.6573080  | 0.05314615  |
| 0.05049516   | 0.3013010   | 0.03220979 | 0.07353624  | 0.08796053  | 0.04494389 |             |
| 0.2783432    | 0.3389732   | 0.01994227 | 0.1205128   | 0.02382345  | 0.08779953 |             |
| 0.07786982   | 0.9202797   | 0.02834461 | 0.05830626  | 0.03129005  | 0.06819073 |             |
| 0.08233331   | 0.1017151   | 0.2443501  | 0           | 0.2166467   | 0          | 0           |
| 0.2859883    | 0           | 0          | 0           | 0.008694667 | 0.02343821 | 0.0275329   |
| 0.07730349   | 0.1801564   | 0.2840918  | 1.3789270   | 0.1550426   | 0          | 0           |
| 0.6953702    | 0.3417759   | 0          | 0.03681119  | 0.2486370   | 0.03390504 | 0.5398974   |
| 0            | 0.03782644  | 4.7850350  | 0.4512409   | 0.03715586  | 0.2019806  | 0.4410469   |
| 0            | 0.6664412   | 0.1239560  | 0.4258790   | 0.0385816   | 2.0388230  | 0.01209929  |
| 0.9869440    | 0.09662937  | 0.8098461  | 0           | 0.3404380   | 0.0492474  | 0.1771538   |
| 2.8695990    | 0.03972059  | 0          | 0.03710028  | 0.05159821  | 0.1961113  | 1.3336050   |
| 0.2620457    | 0.03723023  | 0          | 0.04532721  | 0.4111888   | 0.1283207  | 0           |
| 0.3337114    | 0.1104336   | 0          | 0.1602397   | 0.1537683   | 0          | 0.5711228   |
| 0.2678231    | 0.05493142  | 0.06791841 | 0.4153518   | 0.1380420   | 0.3066967  |             |
| 0.3472950    | 0.08052447  | 0.3988454  | 0.05288174  | 0           | 0.0260840  | 0.5137376   |
| 0.2508373    | 0.0381660   | 0.06791841 | 0.0692458   | 0.4393033   | 0          | 0.0216261   |
| 0.1414088    | 0.5063338   | 0.1810772  | 0.0385816   | 0.04238591  | 0.491058   |             |
| 0.2336095    | 0.1144980   | 0.03245567 | 0.2169231   | 0.03782644  | 0.2579910  | 0.4348083   |
| 0            | 0.1425617   | 0.1181026  | 1.1092810   | 0.1116255   | 0.4282840  | 0.7336674   |
| 0.1620310    | 0.006763748 | 0.1117984  | 0           | 0.07115803  | 0          | 0.1001812   |
| 0.04260213   | 0.06126358  | 0.6162668  | 0.03830353  | 0.1386421   | 2.633106   |             |
| 0.1819355    | 0.6911240   | 0.0444273  | 0.7883933   | 0           | 0          | 0           |
| 0.2830687    | 0.03063179  | 0.04713628 | 0.1459391   | 0.1210159   | 0.2039181  |             |
| 0.4536867    | 0.1161665   | 0.02318262 | 0           | 0.08103606  | 0          | 0.07188536  |
| 0.02418482   | 0           | 0          | 0.009340273 | 0.5663115   | 0.05471933 | 0           |
| 0.08308723   | 0.00446325  | 0.0970706  | 0.04665354  | 0           | 0          | 0.1884714   |
| 0.0381660    | 2.5390420   | 0.1505557  | 0.3321635   | 3.3299440   | 0.02949151 | 0.7412962   |
| 0            | 0.06622573  | 0.1106251  | 0           | 0.1853521   | 0.1573535  | 0           |

TCGA-DK-A1AG 475 0 0.215074862 0.257055582 0.045881774 0.36277429  
0.01941534 53.283447567 0 0.468953594 0.438681727 0.435431402 0  
0.040331092 0.983465859 1.313238342 0.218777729 0.038126785 0.029949539  
0.302655793 0.413358843 0.052764041 0.083054508 0 2.595906707 74.42214607  
0.046596815 0.231217706 0.116492038 0.090834298 0.080088276 1.409553654  
0.083830719 0.063279625 0.027181475 0.697210939 0.217359896 0.202328276  
0.43844661 0.3148456 0.107395835 0.058838222 0.063006868 0.147531034  
0.653543671 0 16.685625457 0.120401166 0.166770805 0.007854542  
1.936680123 0.395730304 7.210244005 0.572187907 1.494981148 0.111843976  
0.134885517 1.17345459 0.129763282 0.010148206 0.996654099 0 0.085224579  
0.565032245 0.027181475 0.00912594 0.354274261 0.341348761 0.587226637  
0.081730177 0.044877483 0.216958715 0.160834729 0.30563373 1.511409512  
4.931496254 0.095678793 0.03936319 0 0.604226543 0.027792059 0.085836238  
0.281187677 0.384767266 0.297091795 0 0.245414142 0.184855373 0.160894832  
0.130708734 0.2299971 0 0 0.080710639 0 0.010326535 0.808741981 0  
0 0.242466191 1.454576252 0 0 0.077999016 0 1.970021887 1.470946081  
0.098570186 0.196742108 0.338046419 0.228896635 0.956787935 0.074957272 0  
0.063842611 2.023555666 0 0.888526531 0.004479344 0.340898314 0.521072267  
0.135650463 0.059951504 0.836840759 0 0.179697233 0.38744702 1.300895876  
0.112315032 1.123714643 0.040772213 1.088703879 0.026696092 0.031921306  
0.166237286 0.149498115 1.344247512 0.490157753 0.227934345 0.033221803  
0.563553103 0.130629421 0.496488204 2.039117143 0 0.082926535 0.031418168  
0 0.191255584 1.179791699 0.25267287 0.057224159 0.281615286 0.27958089  
0.241496955 0.135224425 0.291967385 0.1002222 0.321309381 1.261905347  
0.069534007 0.085973357 1.465771925 1.223166394 0.56939925 0.101450182  
1.325096927 1.480956935 0.044626303 0.124007653 0.132071954 1.430673114  
0.264598433 0.161039262 0.127367936 0.11687149 0.274012717 0.115244799  
0.146000193 1.034221991 0.452799125 0.611235904 0.455820023 0.263389827  
2.523108534 0.27599652 0.354286376 0.027388968 0.122039277 0.287291751  
0.130629421 0.786909742 0.100690966 0.702965494 0.79299 0.027943573  
0.251198699 0.131426914 0.105705738 0.109388864 0.188359063 0.462292356  
0.044961839 0.120098904 0 0.456525817 0 0.323563054 0.82719418  
0.179011936 0.129295667 1.052986722 0.718898038 0.236205053 0.669636348  
0.199441621 0.168712606 0.158408598 0.033976844 0.093925517 0.094419862  
0.031728413 0.400121452 0.051699636 0.079555538 0 0 1.061185659  
0.521550479 0 0.195635483 0 0.364722211 0 0.143385834 0.040818598 0  
0 0 2.242471722 0.023088512 0.04186645 0.191357587 0.280465475  
0.048964321 0.257452722 1.08924742 0.112828766 0.021904486 0.491180247 0  
0.440716986 0.897665321 0 1.927124136 6.143758142 0.311094343 0.121078338  
0.05323375 0.335322874 0.031118428 0.024047954 1.335556599 0.00885259  
0.079301554

TCGA-GV-A3JZ 603 0 0.08116516 0.1410444 0.07358837 0.1876911 0  
13.700230 0.09586101 0.2036702 0.0698375 0.01002545 0.8853868  
0.3263484 1.2976080.1315841 0.1187037 0.04803514 0.4521071

|              |            |            |            |             |             |            |
|--------------|------------|------------|------------|-------------|-------------|------------|
| 0.3535859    | 0.04835807 | 0.03330214 | 0          | 3.34042524  | 6.762       | 0.04203855 |
| 0.01090715   | 0.0934190  | 1.456863   | 0          | 0.8514474   | 0.6722675   | 0.02537306 |
| 0.0653933    | 0.2150452  | 0.3202411  | 0.1406202  | 0.4102064   | 0.1751941   |            |
| 0.1610153    | 0.06133973 | 0.05856584 | 0.2129584  | 0.4978943   | 0.02346905  |            |
| 10.072030    | 2.252923   | 0.1528449  | 0.01259766 | 0.4495789   | 0.4495789   |            |
| 2.1726060    | 0.7036887  | 0.3497971  | 0          | 0.2710177   | 0.2341387   | 0.03436128 |
| 0.7659493    | 0          | 0          | 0.3171832  | 0.02179777  | 0.002927363 | 0.1488168  |
| 0.06083097   | 0.1883669  | 0.5898803  | 0          | 0.1794238   | 0.005374122 | 0.4827693  |
| 0.8431663    | 1.4635640  | 0.01918203 | 0.1025918  | 0.004235068 | 0.05768454  |            |
| 0.04457483   | 0.09178007 | 0.4058894  | 0.07713955 | 0.4948232   | 0.03103889  |            |
| 0.2558479    | 0.08823924 | 0.1935407  | 0.1310248  | 0.1844426   | 0.1006051   |            |
| 0.03047993   | 0.1000290  | 0.01656241 | 0.2830724  | 0.02615732  | 0.0812798   |            |
| 0.1310845    | 1.5864060  | 0.03338494 | 0          | 0           | 0.2695942   | 2.3193230  |
| 0.0526979    | 0.1868380  | 0.4860944  | 0.2523952  | 2.0734870   | 0.1602955   | 0.02984756 |
| 0.1023952    | 1.90656    | 0          | 0.7125402  | 0.003592141 | 0.06834454  | 0.8655793  |
| 0.4623269    | 0.4006432  | 0.3774890  | 0.02401757 | 0.1958238   | 1.859311    |            |
| 0.09006931   | 2.3853860  | 0.0653933  | 0.5608036  | 0.02140852  | 0.2047904   |            |
| 0.4388168    | 0          | 1.4584690  | 0.5109968  | 0.1075226   | 0.05328343  | 0.200859   |
| 0.1745938    | 0.6370417  | 0.6433726  | 0.1139527  | 0.06650166  | 0.1007813   |            |
| 0.1856326    | 0.1226996  | 0.7791542  | 0.08684019 | 0.06883505  | 0.6139945   |            |
| 0.0747352    | 0.08299918 | 0          | 0.2341387  | 0           | 0.8159522   | 0.9087551  |
| 0.1838534    | 0.2810866  | 1.2611560  | 0.1779043  | 0.1355940   | 0.2179777   | 0.7557649  |
| 0.07157475   | 0.2983381  | 0.1941740  | 0.4241557  | 0.1485334   | 0.2066287   |            |
| 0.1174619    | 0.0656063  | 0.2972957  | 0.09241879 | 0.1463533   | 0.7336809   |            |
| 0.3477724    | 0.3431199  | 0.3394280  | 0.1929677  | 0.3996257   | 0.2529499   |            |
| 0.1291430    | 0.3074983  | 0.4893376  | 0.3583832  | 0.2095125   | 0.7338617   |            |
| 0.05383171   | 0.4540126  | 0.2710505  | 0.2801115  | 0.08393539  | 0.2898384   |            |
| 0.5570540    | 0.1973761  | 0.1098557  | 0.3631624  | 0.03605645  | 0.1029998   | 0          |
| 0.3525444    | 0          | 0.08649214 | 0.2487584  | 0.4009664   | 0.2592167   | 0.1876503  |
| 0.5503043    | 0.2273052  | 0.2165341  | 0.06397565 | 0.1052306   | 1.069197    |            |
| 0.08174162   | 0.2259664  | 0          | 0.08057302 | 0.1724084   | 0.02072986  | 0.06379834 |
| 0.29629      | 0.02729891 | 0.8567515  | 1.4254940  | 0.03930745  | 0.2823964   | 0          |
| 0.09140105   | 0.05576173 | 0.1061410  | 0.2455038  | 0.1699196   | 0           | 0.4803936  |
| 2.6532530    | 0.09257738 | 0.01678708 | 1.6112910  | 0.1044248   | 0.0120819   | 0.3237672  |
| 0.2946765    | 0.1266738  | 0.03513193 | 0.5852146  | 0.3357717   | 0.06236933  |            |
| 1.47953      | 0.04075503 | 1.6297243  | 0.3502870  | 0.1496864   | 0.2589251   | 0          |
| 0.04990989   | 0.03856977 | 0.7333172  | 0.1455336  | 0.05652859  |             |            |
| TCGA-XF-A9SV | 388        | 1          | 0.08936564 | 0.09556597  | 0           | 0.2479853  |
| 58.548670    | 0.3113525  | 0.1082526  | 0.05436314 | 0.4100986   | 0.02943565  |            |
| 1.0208380    | 0.7186417  | 0.4417272  | 0.08048811 | 0.02112272  | 0.1410356   |            |
| 0.08383756   | 0.5839653  | 0.03549593 | 0.04888907 | 0.1224352   | 3.056101    |            |
| 45.032130    | 0.1234290  | 0.03202438 | 0.4114301  | 0           | 0           | 0.8620441  |
| 0.07449764   | 0          | 0.8839495  | 0.3213537  | 0.2223166   | 0.4301442   | 0.166419   |
| 0.08795452   | 0.02770755 | 0.08766317 | 0.06947395 | 0           | 0.2756291   | 4.194058   |

|                   |                           |                    |                    |                                     |
|-------------------|---------------------------|--------------------|--------------------|-------------------------------------|
| 0.0944970.1682875 | 0.4068667                 | 0.8400032          | 0.2329421          | 6.2400240.2377495                   |
| 1.14783           | 0.1843398                 | 0                  | 0.7515256          | 0 0.06106371 0.9777815 0            |
| 0.1003329         | 0.06651994                | 0.06400024         | 0.1418176          | 0.1509428 0.1786053                 |
| 0.8987268         | 0.2886571                 | 0.02641661         | 0.1277102          | 0.0946735 0.196263                  |
| 1.0830810.1828578 | 0                         | 0.3012189          | 0.03730364         | 0.2709874 0.1308758 0               |
| 0.2648286         | 0.2264888                 | 0.1614274          | 0                  | 0.1733522 0.3627099 0               |
| 0.07694018        | 0.3249243                 | 0 0                | 0.1209330.04657129 | 0.1458863 0.3366588                 |
| 0 0               | 0.4297784                 | 1.1416260.1260273  | 0.2445161          | 0 0 1.480379                        |
| 0.7470125         | 0.07736293                | 0.07314313         | 0.1646790.3368434  | 0.5363830.2353212                   |
| 0                 | 0.2254813                 | 1.9442870.09869196 | 0.6973611          | 0.01054686 0.1003329 0              |
| 0.1596981         | 0.4839738                 | 0.7388949          | 0                  | 0.0705178 0.1609879 1.630322        |
| 0.02404107        | 0.4669141                 | 0                  | 0.5332645          | 0 0 0.3587967 0 1.047277            |
| 0.5770514         | 0.2052026                 | 0 0                | 0.1025247          | 0.1558677 0.6821392 0               |
| 0.26034           | 0 0                       | 0.2701929          | 0.2451073          | 0.08499026 0 0.2486544              |
| 0.1097147         | 0.1624622                 | 0.1061311          | 0.1527673          | 0 1.38699 0.9904079 0               |
| 0.06747629        | 0.4501616                 | 0.8228603          | 0.8966893          | 0.5971747 0.3200012                 |
| 0.7132485         | 0                         | 0.04866378         | 0.1036568          | 0.2041574 0.06230112 0.07583512     |
| 0.08996839        | 0                         | 0.1897581          | 0                  | 0.02148533 0.5619533 0.1501605      |
| 0.1439188         | 0.07666091                | 0.1148455          | 1.0992320.1856710  | 0.2579552                           |
| 0.2873480.3006417 | 0.2050493                 | 0.7702740          | 0.3887983          | 0.4183204                           |
| 0.2302812         | 0.2217978                 | 0.1547259          | 0.8177809          | 0.3863429 0.04031832                |
| 0.2332483         | 0.6351904                 | 0.08640479         | 0                  | 0.8360446 0.1394065 0               |
| 0.2434591         | 0.7775823                 | 0.1522168          | 0.2754793          | 0.07694018 0.05561575               |
| 0.3814584         | 0.0939192                 | 0                  | 0.01243272         | 0 0 0 0.1245104 0.3093487           |
| 0.1825943         | 0 0                       | 0.2404563          | 0.9285407          | 0.6715008 0.1154103                 |
| 0.1381903         | 0                         | 0.1073448          | 0                  | 0.06492493 0.09610958 0 0 0.4639736 |
| 1.12525           | 0.1087263                 | 0.1478652          | 0.1126404          | 0.09433871 0.008868394              |
| 0.1515466         | 0.4634985                 | 0.05313228         | 0                  | 0.3084027 0 0 0.6585089             |
| 0.05983025        | 1.4025053.8491630.1367312 | 0.1900570          | 0.1315893          | 0.05495251                          |
| 0.0566222         | 0.3682911                 | 0                  | 0.08298656         |                                     |
| TCGA-UY-A78K      | 536 1                     | 0.05365435         | 0.1004097          | 0.04864569 0.2853690.06175476       |
| 46.317340.2336667 | 0.1754835                 | 0.4651079          | 0                  | 0.1325468 0.5799412                 |
| 0.6831548         | 1.3177580.1449731         | 0.0856028          | 0.0952611          | 0.05033534                          |
| 0.2629558         | 0.04795076                | 0.02201443         | 0.05513179         | 4.22542321.985380.04322833          |
| 0.1297833         | 0.1235095                 | 0.09630616         | 0                  | 1.8826380.2666421 0.1006374 0       |
| 0.3127431         | 0.2143755                 | 0.1001077          | 0.4648587          | 0.2452496 0.1881254                 |
| 0.07485917        | 0.1047583                 | 0.06256732         | 0.5196849          | 0.09308548 15.12773                 |
| 0.1276541         | 0.2525958                 | 0.2664864          | 0.7024604          | 0.6643178 3.253501                  |
| 0.07137136        | 0.5513179                 | 0.2134466          | 0                  | 0.7663924 0.03439506 0.04303814     |
| 0.5723751         | 0.09510233                | 0.1355378          | 0.4792558          | 0 0 0.1895965                       |
| 0.2412744         | 0.6537313                 | 0.2599608          | 0.01784284         | 0.1365793 0.07105143                |
| 0.4615188         | 0.7663924                 | 2.1408320.1521637  | 0.06260165         | 0.05599195                          |
| 0.04575894        | 0.1915306                 | 0                  | 0.4571272          | 0.2039728 0.2665288 0.2462196       |
| 0.07805937        | 0.3546505                 | 0.08529357         | 0.03464566         | 0.04877043 0 0                      |

|              |             |            |            |            |            |            |
|--------------|-------------|------------|------------|------------|------------|------------|
| 0.1089106    | 0.04194149  | 0.03010867 | 0.3174026  | 0.06916533 | 0          | 0.3841643  |
| 0.2467520    | 0.006305475 | 0          | 0          | 0.1296114  | 1.0665680  | 0.7339087  |
| 0.3831283    | 0.1516784   | 0.2536062  | 0          | 0          | 0.06768849 | 5.7629030  |
| 0.8523322    | 0           | 0.09035851 | 0.5919232  | 0.3595551  | 0.2270107  | 0.1663598  |
| 0.07315564   | 0.0635074   | 0.1795035  | 1.2569080  | 0.03247661 | 0.4485298  |            |
| 0.2161417    | 0.7709292   | 0.05660853 | 0.3384425  | 0.4406286  | 0.05283463 |            |
| 1.2365920    | 0.6236219   | 0.1705871  | 0.07044617 | 0.03319453 | 0.09233236 |            |
| 0.03509311   | 1.0396280   | 0.3013143  | 1.1722940  | 0.0666216  | 0          | 0.3244429  |
| 0.8093816    | 0           | 0.1516784  | 0.1819471  | 0.04940381 | 0.2194669  | 0.09558023 |
| 0.06879011   | 0.03541986  | 0.6813301  | 1.6607552  | 7.277410   | 0.1519207  | 0.4054096  |
| 0.6175476    | 0.3057701   | 0.1971962  | 0.2881889  | 0.4995995  | 0          | 0.02191298 |
| 0.11669      | 1.0112380   | 0.1122151  | 0.1024442  | 0.1485446  | 0.01239118 | 0.3076086  |
| 0            | 0.16447     | 0.1265220  | 0.2501803  | 0.3888341  | 0.1380796  | 0.1723805  |
| 1.4849310    | 0.08360645  | 0.1365922  | 0.02903888 | 1.2939090  | 0.1353770  | 0.1846647  |
| 0.6280785    | 0           | 0.3901634  | 0.5283463  | 0.1481345  | 0.1331655  | 0.1741801  |
| 0.1921259    | 0           | 0.1331372  | 0.3150906  | 0          | 0.1149540  | 1.3624460  |
| 0.03811717   | 0.1644421   | 0.2879658  | 0.1028133  | 0.4961861  | 1.004724   |            |
| 0.1878255    | 0.3893413   | 0.2114560  | 0.2782513  | 0.02799186 | 0.1801181  |            |
| 0.09958359   | 0           | 0.07008278 | 0.5445273  | 0          | 0.1265220  | 0.4352510  |
| 0.2128589    | 1.3751730   | 0.06222617 | 0.06879011 | 0.1450099  | 0.07372274 |            |
| 0.04677643   | 0.1081938   | 0.07488373 | 0          | 0.1253546  | 1.1692910  | 0.02447936 |
| 0.09987409   | 0.5579337   | 0.1699204  | 0.04392717 | 0.1737029  | 0.4035066  |            |
| 0.07177535   | 0.06967204  | 0.5257287  | 0.03414805 | 0          | 1.5447850  | 0.3771764  |
| 1.3745264    | 6.4446640   | 0.1539229  | 0.7702326  | 0          | 0          | 0.2474475  |
| 0.121447     |             |            |            |            |            |            |
| TCGA-FD-A6TH | 131         | 1          | 0.1075861  | 0.1882647  | 0          | 0.2894994  |
| 49.038660    | 0.09241149  | 0.1070952  | 0          | 0.04832346 | 0.6761957  | 0.1048683  |
| 0.2900671    | 0.06342454  | 0.03467642 | 0.02315331 | 0          | 0.5539011  | 0.0291362  |
| 0.4976086    | 0.1607981   | 3.01025565 | 0.001320   | 0.1576004  | 0.01051466 | 0.3602294  |
| 0.1053329    | 0           | 0.5943785  | 0.2592305  | 0.1467601  | 0.02101338 | 0.6841128  |
| 0.08987972   | 0.1981262   | 0.1694766  | 0.1490204  | 0.1985387  | 0.0181946  |            |
| 0.06310053   | 0.08363879  | 0.2778819  | 0.09049809 | 0.05620601 | 0.2171853  |            |
| 0.05525431   | 0.06072168  | 0.2758006  | 0.5098835  | 2.4884270  | 0.02602032 |            |
| 0.7537409    | 0.09511045  | 0          | 0.1524047  | 0.02507926 | 0.04445697 | 0.3210378  |
| 0.1040162    | 0.06588519  | 0.1747254  | 0.02101338 | 0.01975416 | 0.0443427  |            |
| 0.2345680    | 0.4312730   | 0.6634293  | 0.03903048 | 0.1415187  | 0.01554221 | 0.2076387  |
| 0.3556111    | 1.5009560   | 0.01849178 | 0.05325388 | 0.01633068 | 0.04448703 |            |
| 0.04297082   | 0.02211935  | 0.08695193 | 0.1115456  | 0.9363670  | 0.05691723 |            |
| 0.1122845    | 0.06219207  | 0.02526199 | 0.4978555  | 0.04849242 | 0          | 0.08508486 |
| 0.01529088   | 0.08182791  | 0.1761670  | 0.02521606 | 0.03917749 | 0.1642777  |            |
| 0.5247666    | 0.0160918   | 0.02007067 | 0          | 0.02362663 | 0.9721144  | 0.847292   |
| 0.02540079   | 0.04002549  | 0.2162781  | 0.02211935 | 0.8541440  | 0.1352115  |            |
| 0.1150940    | 0.04935527  | 1.6695910  | 0.03240381 | 0.4252236  | 0.05540607 | 0.03294259 |
| 0.3452821    | 0.1835195   | 0.3840192  | 0.4852070  | 0.3733916  | 0.04630662 |            |

|              |            |            |             |            |            |                       |
|--------------|------------|------------|-------------|------------|------------|-----------------------|
| 0.1258515    | 1.2652270  | 0.03946737 | 0.4292490   | 0.9215171  | 0.08255257 |                       |
| 0.1727435    | 0.2516738  | 0          | 0.3591378   | 0.03789298 | 0.05960074 | 0.07704907            |
| 0.1210195    | 0.1009866  | 0.2047060  | 0.3014964   | 0          | 0.08547816 | 0.07286602 0          |
| 0.3844239    | 0.8047678  | 0.08371529 | 0.0884774   | 0.1700862  | 0.07204588 |                       |
| 0.4534041    | 0          | 0.3260304  | 0.0258265   | 0.4139951  | 1.2133710  | 0.1329281             |
| 0.1724366    | 0.5853728  | 0.1229101  | 0.3485726   | 0.4990678  | 0.2602032  |                       |
| 0.1034987    | 0.1517902  | 0.05105092 | 0.3619705   | 0.06136651 | 0.09959664 |                       |
| 0.1181583    | 0.03614028 | 0.1744507  | 0.1781863   | 0.2327932  | 0.3690155  |                       |
| 0.2760948    | 0.1417598  | 0.2013624  | 0.0980396   | 0.6488343  | 0.3962523  |                       |
| 0.02489916   | 0          | 0.1415187  | 0.2220987   | 0.1346489  | 0.5126478  | 0.0259473             |
| 0.5087974    | 0.1875977  | 0.2916343  | 0.0323660   | 0.1778055  | 1.4709370  | 0.1902736             |
| 0.03530088   | 0.1932811  | 0          | 0.1108991   | 0          | 0.2352865  | 0.09154345 0          |
| 0.07993563   | 0.4915233  | 0.5247666  | 0.1507482   | 0.3536679  | 0.575205   |                       |
| 0.3089385    | 0.03854595 | 0.02898398 | 0.02041035  | 0.02626673 | 0.1210195  | 0                     |
| 0.2493733    | 0.1523540  | 0          | 0           | 0.02631657 | 0.6208271  | 0.2126170             |
| 0.8620757    | 0          | 0.08811202 | 0.1612655   | 0.06821436 | 0.06311186 | 0                     |
| 0.0502234    | 0          | 1.13679    | 0.08924602  | 0.1294641  | 0.5902930  | 0.0619490             |
| 0.3596126    | 0.05072726 | 0          | 0.03386772  | 0.3290909  | 0.09959664 | 0                     |
| 0.5265762    | 0.1375097  | 0.4604886  | 3.0480040   | 0.04168666 | 0.2028063  | 0                     |
| 0.04320508   | 0.03007119 | 0.01859093 | 0.2511459   | 0.03421868 | 0.07492984 |                       |
| TCGA-DK-AA6W | 415        | 1          | 0.49636     | 0.2464420  | 0.06428923 | 0.4755222 0 79.994890 |
| 0.1932631    | 0.6146778  | 0.2440494  | 0.3328256   | 1.3068321  | 0.2829891  | 0.1018627             |
| 0.3544483    | 0.1162736  | 0.04196509 | 0.008315279 | 0.1544522  | 0          | 0.08728156            |
| 0.07286113   | 3.26481775 | 0.6328     | 0.1713892   | 0          | 0.1632278  | 0.0636382 0           |
| 2.0776570    | 0.3546679  | 0.07617299 | 1.1272240   | 0.5595463  | 0.3213011  |                       |
| 0.3071742    | 0.1170423  | 0.1570250  | 0.04946623  | 0.1665372  | 0.1378131  | 0.23625 0             |
| 19.457690    | 0.4498808  | 0.2336781  | 0.03301719  | 0.6427096  | 0.6931182  |                       |
| 7.0434960    | 0.5187767  | 3.4609030  | 0.1567150   | 1.5653130  | 0.04545586 | 0.01737951            |
| 2.1529450    | 0.06284272 | 0.2388322  | 0.7521333   | 0          | 0.01790209 | 0.4538575             |
| 0.3188637    | 0.3291272  | 0.6871186  | 0.09432303  | 0.3040011  | 0.07512017 |                       |
| 0.8824584    | 2.4860861  | 0.1970040  | 0.4021934   | 1.2272080  | 0.02959916 | 0.2015805             |
| 0.03894204   | 0          | 0.1838658  | 0.2021750   | 0.1280871  | 0.1898162  | 0 0.314522            |
| 0.1127224    | 0.2289352  | 1.0312650  | 0           | 0.1747773  | 0.2217163  | 0.07596472            |
| 0.5259067    | 0.0457038  | 0          | 0.7978211   | 0.8750910  | 0.1499975  | 0.07275568 0          |
| 0.08564596   | 3.1715022  | 0.3843860  | 0.04603862  | 0.5586021  | 0.2576710  | 0.2004552             |
| 1.3725650    | 0.1750494  | 0          | 0           | 3.1151170  | 0.05873151 | 2.4899950 0.05970805  |
| 1.8253070    | 0.7127719  | 0.4200182  | 0.6595737   | 0          | 0.08393018 | 0.2372284             |
| 1.8375060    | 0.4005911  | 0.3337290  | 0.2285191   | 0.09679    | 0.03740638 | 0.1341837 0.1649925   |
| 0.06982525   | 1.2741660  | 0.4120834  | 0.8078436   | 0.4655016  | 0.1316078  |                       |
| 0.3050618    | 0          | 1.0148510  | 0.2323922   | 0          | 0.05405825 | 1.33993 0.7293159     |
| 0.1011553    | 0.1202731  | 0.2527890  | 0.7251083   | 0          | 1.2273080  | 0.7503608             |
| 1.7813680    | 0.06495372 | 0.2007755  | 0.04464847  | 2.5300320  | 0.08289229 | 0.1263567             |
| 0.7141218    | 1.4148450  | 0.06253007 | 0.2027185   | 0          | 1.9196040  | 0.03707535            |
| 0.2256471    | 0.2230839  | 0          | 1.1066640   | 0.2691337  | 0.1534309  | 3.34418               |

|              |            |             |            |             |            |             |             |
|--------------|------------|-------------|------------|-------------|------------|-------------|-------------|
| 0.4289301    | 0.2569379  | 0.6386919   | 0.5376431  | 0.4994050   | 0.3314781  | 0.2256471   |             |
| 0.1151317    | 1.1970040  | 0.2683675   | 0.1830371  | 0.5203340   | 1.4477380  | 0.279301    |             |
| 0.1174630    | 0.1026602  | 0.04603862  | 1.3541870  | 0.1915937   | 0.1679538  | 0.5816628   |             |
| 0.3150011    | 0.2313874  | 0           | 0.4738377  | 0           | 0.1511248  | 0.5795294   |             |
| 4.1343750    | 0.7699649  | 0.7103961   | 0.7399081  | 0.3073271   | 0.6041730  | 0.2095922   | 0.1575993   |
| 0.4439221    | 0          | 0.3948234   | 0          | 0.01852401  | 0.2175647  | 0.1086618   | 0           |
| 0.3451316    | 0.1430954  | 0.2913571   | 1.3904230  | 0.1370615   | 0          | 0.06388078  |             |
| 0.2922917    | 0.1622745  | 0.8579211   | 0          | 0           | 0.7178873  | 0.2451570   | 0.09705439  |
| 0.07332873   | 0.4021934  | 0.2666693   | 0.3588751  | 1.7504141   | 0.3423610  | 0           |             |
| 0.5833643    | 0.2041890  | 0.07265054  | 1.1819550  | 0.1780247   | 1.66926    | 0.1646861   | 0.0929927   |
| 0.1413784    | 0          | 1.0180130   | 0.1308088  | 0           | 1.8039360  | 0.006202094 | 0.1234631   |
| TCGA-CF-A3MG | 369        | 0           | 0.01662761 | 0.03556253  | 0          | 0.2153238   | 0           |
| 0.1329357    | 0.2427589  | 0.2289122   | 0.01643063 | 0.02319034  | 0.1782832  |             |             |
| 0.3698503    | 0.0359420  | 0.07074271  | 0          | 0           | 0          | 0.03962681  | 0.2183144   |
| 0.0683419    | 1.83739    | 27.539      | 0.1224829  | 0           | 0          | 0           | 0.6977150   |
| 0.08316739   | 0          | 0.2114615   | 0.06643549 | 0.08863893  | 0.09604055 | 0.1351172   |             |
| 0.05523206   | 0.0618641  | 0.06022466  | 0.02585302 | 0.08589419  | 0          | 5.3271370   |             |
| 0.1252481    | 0          | 0.4688798   | 0.1300255  | 2.3549750   | 0.7688463  | 0.01469947  |             |
| 0            | 0.2837744  | 0           | 0.01037371 | 1.1461510   | 0          | 0.1113919   | 0.03572417  |
| 0.0665167    | 0.04984768 | 0.1929456   | 0.1074166  | 0.007372719 | 0.1514835  |             |             |
| 0.05284562   | 0.2556206  | 0.6909291   | 4.7972460  | 0           | 0          | 0.03781548  | 0           |
| 0.03760439   | 0.3449231  | 0.06321167  | 0.4204986  | 0           | 0.06450877 | 0.2313833   |             |
| 0            | 0.04294709 | 0.1813689   | 0          | 0           | 0.04821668 | 0           | 0.006785999 |
| 0.08573802   | 0          | 0.2040916   | 1.8097670  | 0.003908164 | 0          | 0           | 0.9365075   |
| 0.2653468    | 0          | 0.04763223  | 0.1685234  | 0           | 0.5988052  | 0.03283838  | 0           |
| 0.2097683    | 1.6815840  | 0.1112168   | 0.02354852 | 0.1120093   | 0.2445846  |             |             |
| 0.08914161   | 0.01125618 | 0.5499231   | 0          | 0.07872439  | 0.1198154  | 2.7438670   |             |
| 0.3822513    | 0          | 0.5169917   | 0          | 0.1258610   | 0.3095176  | 0           | 1.0262580   |
| 0.08810895   | 0          | 0.04114826  | 0.05722805 | 0.1305053   | 0.3807620  | 0           | 0           |
| 0            | 0.5472639  | 0.04744055  | 0          | 0.4221709   | 0.1224829  | 0.1813689   |             |
| 0.2369644    | 0.1279093  | 0           | 0.1407639  | 0.6188440   | 0.09138742 | 0.07532893  |             |
| 0.04187914   | 0          | 0.3644573   | 0.03703731 | 0           | 0.9289626  | 0.1759549   |             |
| 0.04074531   | 0          | 0.4102496   | 0.03477574 | 0.04233026  | 0.1339181  | 0.01536023  |             |
| 0.08473658   | 0.05048813 | 0.08394999  | 0.5227928  | 0.2263081   | 0.2811681  |             |             |
| 0.3423296    | 0.06410537 | 0.2481890   | 0          | 0.1439875   | 0          | 0.1258610   | 0.2289122   |
| 0.6972288    | 0          | 0.3317345   | 0.2335015  | 0.03672579  | 0.1650732  | 0.04318307  |             |
| 0.4763223    | 0.2875360  | 0.03000694  | 0.2169941  | 0.3545557   | 0.07672975 | 0           |             |
| 0.3555582    | 0          | 0.1890016   | 0.0679480  | 0.02839496  | 0.4673108  | 0.2562821   |             |
| 0.8159948    | 0.0620881  | 0.2555106   | 0.01310614 | 0.04927472  | 0.09368724 | 0           |             |
| 0            | 0          | 0.003475012 | 0.2590122  | 0           | 0          | 0           | 0.04473995  |
| 0.6700616    | 0          | 0.1028482   | 0          | 0.1497964   | 0.09138742 | 0.03624032  |             |
| 0.1072944    | 0.09282659 | 0           | 0          | 0.5797858   | 0          | 0.0550244   | 0           |
| 0.04455209   | 0.1499576  | 0.1379836   | 0.4745249  | 0           | 0.1598505  | 0.04233026  |             |
| 0            | 0.7173579  | 0           | 0.4144562  | 1.4323710   | 0.0654186  | 0.02652188  | 0           |

|              |            |             |            |            |            |            |                    |
|--------------|------------|-------------|------------|------------|------------|------------|--------------------|
| 0            | 0.2530163  | 0.01745222  | 0.1852884  |            |            |            |                    |
| TCGA-DK-A3X1 | 2009       | 0           | 0.1185296  | 0.1109092  | 0.05373243 | 0.109638   |                    |
|              | 0.04547485 | 31.574950   | 0.08614815 | 0.2433519  | 0.3059618  | 0.01464068 |                    |
|              | 0.3985199  | 0.1191458   | 0.8238973  | 0.1040861  | 0.1365780  | 0.2104445  |                    |
|              | 0.2432446  | 0.3227247   | 0.1235846  | 0.02431641 | 0.06089675 | 4.131566   |                    |
|              | 65.533530  | 0.1159609   | 0.5097044  | 0.1364245  | 0          | 0          | 2.2938810.3436114  |
|              | 0.03705358 | 0           | 0.1256166  | 0.3137495  | 0.09477916 | 0.2995227  | 0.1354473          |
|              | 0.09296186 | 0.1584834   | 0.05869479 | 0.0345549  | 0.4209530  | 6.109111   |                    |
|              | 0.1880034  | 0.05580181  | 0          | 0.7162289  | 0.8882642  | 3.3424010  | 0.1576689          |
|              | 1.1418140  | 0.02619623  | 0          | 0.4067750  | 0.4938914  | 0.04093594 | 4.5228530.05252345 |
|              | 0          | 0.5293702   | 0          | 0.01709991 | 0.2607897  | 0          | 0.1375410.1914294  |
|              | 0.1985013  | 0.03139242  | 0.1735416  | 0.2308723  | 2.0918430  | 0.1400625  |                    |
|              | 0.04609848 | 0.01236937  | 0.2190232  | 0.0650949  | 0.2010467  | 0.6366479  | 0                  |
|              | 0.4817437  | 0.06799152  | 0.0574812  | 0.08762499 | 0.4710623  | 0.03826845 |                    |
|              | 0.1616106  | 0           | 0          | 0.03437117 | 0.06949078 | 0.03325704 | 0.1465162          |
|              | 0.1527955  | 0           | 0.3350015  | 1.0447910  | 0.1079547  | 0.1520216  | 0                  |
|              | 0.1431644  |             |            |            |            |            |                    |
|              | 1.0799210  | 0.7768742   | 0.4617446  | 0.2000893  | 0.2730264  | 0.06701557 |                    |
|              | 1.6273930  | 0.05852195  | 0.04358793 | 0.03738324 | 2.5823370  | 0.9910085  |                    |
|              | 0.02098315 | 0.1497105   | 0.4794672  | 0.3177222  | 0.4346307  | 0.367511   |                    |
|              | 0.08080531 | 0.07014818  | 0.1105757  | 2.4080930  | 0.7276646  | 0.1432458  |                    |
|              | 0.9353013  | 0.09379188  | 0.03738324 | 0.1541229  | 0.1167188  | 4.329206   |                    |
|              | 0.05740268 | 0.06280831  | 0.2723438  | 0.1466623  | 0.1529809  | 0.3876269  |                    |
|              | 1.2788320  | 0.2080137   | 0.03237193 | 0.03679401 | 0          | 0.04479612 | 1.1784760          |
|              | 0          |             |            |            |            |            | 0                  |
|              | 0.2885762  | 0           | 0.4848318  | 0.05278739 | 0.1139749  | 0.03912361 | 0.2508583          |
|              | 0.2867422  | 0.2985829   | 0.06712262 | 0.3731684  | 0.8867596  | 0.2987731  |                    |
|              | 0.3432258  | 0.03979049  | 0.3153378  | 0.05226214 | 0.02420435 | 0.07733514 |                    |
|              | 0.6803424  | 0.3718474   | 0          | 0.05966455 | 0.01368689 | 0.09438176 | 0                  |
|              | 0.02137272 | 0.09316798  | 0.3510277  | 0.1431644  | 0.2669068  | 0.2208708  |                    |
|              | 1.7753540  | 0.2308723   | 0.1131564  | 0.06415078 | 0.1429210  | 0.1121497  | 0.05099364         |
|              | 0.3106365  | 0.07861321  | 0.3011206  | 0.4313520  | 0.2454367  | 0.1838627  |                    |
|              | 0.3463085  | 0.2122160   | 0.1601325  | 0.05347599 | 0.2541235  | 0.05265509 |                    |
|              | 0.08985881 | 0           | 0.9504715  | 0.1386758  | 0.08420593 | 0.2421831  | 0.4843453          |
|              | 0.07570948 | 0.6850885   | 0.2296107  | 0.0691553  | 0.3541617  | 0.07007019 |                    |
|              | 0.1097669  | 0.04328643  | 0.03979049 | 0.03666558 | 0          | 0.04644668 | 0.4615909          |
|              | 0.09081865 | 0.09316798  | 0.04807638 | 0          | 0.1343526  | 0.5398752  | 0                  |
|              | 0.09164397 | 0           | 0.1334776  | 0          | 0.07104309 | 0.04780291 | 0                  |
|              | 0.01086879 |             |            |            |            |            |                    |
|              | 0.4338492  | 1.5498720   | 0.0270391  | 0.02451503 | 0          | 0.08211371 | 0.03528764         |
|              | 0.3323402  | 0.1844276   | 0.3699765  | 0          | 0.2739163  | 0          | 0.03036038         |
|              | 1.0565440  | 0.05951666  | 2.6261733  | 0.2909270  | 0.02914596 | 0.3544890  | 0.06544978         |
|              | 0          |             |            |            |            |            | 0                  |
|              | 0.4227239  | 0.005183662 | 0.3302064  |            |            |            |                    |
| TCGA-DK-A1A6 | 2020       | 0           | 0.1024     | 0.1095047  | 0.1237879  | 0.06314555 | 0                  |
|              | 75.460770  | 0.05788612  | 0.1661126  | 0.07831887 | 0.02248598 | 0.174553   |                    |
|              | 0.3354831  | 0.6748732   | 0.01844553 | 0.0161357  | 0.05386874 | 0.2935338  |                    |
|              | 0.3221781  | 0.05423088  | 0.0746930  | 0.2338216  | 3.66896821 | 0.167970   | 0.2671487          |
|              |            |             |            |            |            |            | 0                  |



|              |             |             |             |            |            |            |            |
|--------------|-------------|-------------|-------------|------------|------------|------------|------------|
| 0            | 0           | 0           | 0.7572955   | 0.07539106 | 0.08536343 | 0.07333494 | 0.4340902  |
| 0.48642      | 0.1819589   | 0.2628707   | 0.1502421   | 0.05039153 | 0.03704028 |            |            |
| 0.1480982    | 0.1326783   | 0.1469370   | 0.02631923  | 2.5663510  | 0.03609326 | 0.02142588 |            |
| 0.007063786  | 0.2291717   | 0.1482876   | 2.2579440   | 0.1816175  | 0.9645139  |            |            |
| 0.1508761    | 0.06065296  | 0.3123739   | 0           | 0.03042179 | 0.8216230  | 0.2682561  |            |
| 0.1016295    | 0           | 0.008207187 | 0.06068718  | 0.1364371  | 0.4224861  | 0.183755   |            |
| 0.00504493   | 0.1158504   | 0.02410712  | 0.2332181   | 0.0342114  | 7.143890   | 0.2366274  |            |
| 0.01770015   | 0           | 0.06469001  | 0           | 0.02573156 | 0.2191619  | 0.1297616  |            |
| 0.1233148    | 0           | 0.04414142  | 0.1068718   | 0.07234837 | 0.08816223 | 0.5791580  |            |
| 0.1025446    | 0.01319729  | 0           | 0.004643456 | 0.1647525  | 0.02933398 | 0.09115078 |            |
| 0.2009054    | 1.2034860   | 0.005348479 | 0           | 0          | 0.05496997 | 0.4900419  | 0.07781521 |
| 0.05909776   | 0.009312374 | 0.1048323   | 0.1286578   | 0.6043730  | 0.06741095 | 0          |            |
| 0.02870763   | 2.4318860   | 0.03769553  | 0.3805115   | 0          | 0.0383223  | 0.2343067  |            |
| 0.1829908    | 0.1951242   | 0.3762959   | 0.1241053   | 0.05386874 | 0.1141949  |            |            |
| 3.0569090    | 0.0459126   | 0.4517908   | 0.03666747  | 0.2894416  | 0.1680592  |            |            |
| 0.1148305    | 0.5419424   | 0           | 0.5866795   | 0.4408111  | 0.1386677  | 0.0298772  |            |
| 0.08446957   | 0.1174783   | 0.1786017   | 1.2926990   | 0          | 0.05651029 | 0          |            |
| 0.03440019   | 1.3106670   | 0.1298486   | 0           | 0.4392542  | 0          | 0.1551316  | 0          |
| 0.02917484   | 0           | 0.9632052   | 0.6492998   | 0.06253367 | 0.1030907  | 0.2865664  |            |
| 0.7857315    | 0.8711925   | 0.09123669  | 0.4277872   | 0.72647    | 0.1204007  |            |            |
| 0.05576159   | 0.03959187  | 0.4132844   | 0.11898     | 0.02896533 | 0.04009081 |            |            |
| 0.03153164   | 0.2754178   | 0           | 0.1230953   | 0.2861851  | 0.2179453  | 0.4947298  |            |
| 0.1756844    | 0.04094102  | 0.7642273   | 0.1418346   | 0          | 0.1231579  | 0.8780238  |            |
| 0.3157839    | 0.1566377   | 0.3776984   | 0           | 0.3394333  | 0.1792632  | 0.1382169  |            |
| 0.08471598   | 0.1181955   | 0.2851914   | 0.1967523   | 0.1129307  | 0.343631   |            |            |
| 0.2021765    | 0.07500552  | 0           | 0.7907179   | 0          | 0          | 0.04649478 | 0.1415601  |
| 0.3779062    | 0.1402929   | 0.8228474   | 0.4460927   | 0.3885295  | 0.1345221  |            |            |
| 0.01685861   | 0.1733273   | 0           | 0.1970957   | 0          | 0.03804554 | 0.7035663  |            |
| 0.1162369    | 0           | 0.1476768   | 0.06122841  | 0.8253845  | 0.8766017  | 0          |            |
| 0.05278197   | 0.02917484  | 0.2050024   | 0.1250673   | 0.1091119  | 0.1284822  | 0          |            |
| 0.00834645   | 0.4394941   | 0.5289734   | 0.02076408  | 0.04706443 | 0          | 0.1171066  |            |
| 0.02032377   | 0.07630087  | 0.3304632   | 0.04058789  | 0          | 0.3660054  | 0.2027573  |            |
| 0            | 0.4868098   | 0.09140899  | 0.9138221   | 1.7776840  | 0.1007190  | 0.1451850  |            |
| 0.1507821    | 0.03498198  | 0           | 0.1623107   | 0          | 0.05546946 |            |            |
| TCGA-XF-AAMG | 3364        | 0           | 0.1175205   | 0.2154417  | 0.06088568 | 0.3105845  |            |
| 0.05152879   | 30.800660   | 0.1169843   | 0.3294568   | 2.2672670  | 0.08294879 |            |            |
| 0.4716438    | 0.4050222   | 4.1077540   | 0.3719735   | 0.2708305  | 0.07948682 |            |            |
| 0.03150023   | 1.2799090   | 0.03000794  | 0.08266077  | 0.06900378 | 8.445072   | 23.05232   |            |
| 0.5410523    | 0           | 0.2318796   | 0.1205382   | 0.1062781  | 2.283462   | 3.504199   |            |
| 0.1679457    | 0           | 0.8184529   | 0.7110364   | 0.2863916  | 2.08487    | 0.2216919  |            |
| 0.2106752    | 0.07027115  | 0.2546332   | 0.3523959   | 0.9539866  | 0.03883573 |            |            |
| 8.1525130    | 0.2130318   | 0.4426139   | 0.0416923   | 0.8115785  | 1.269086   | 3.089694   |            |
| 0.2233237    | 0.8625472   | 0.6381989   | 0.08949738  | 0.7723657  | 0.2152469  |            |            |
| 0.07780815   | 7.4945770   | 0.3958293   | 0.1499610   | 0.03607016 | 0.03875276 |            |            |

|              |            |            |            |            |             |            |
|--------------|------------|------------|------------|------------|-------------|------------|
| 0.2283471    | 0.4529740  | 0.1168886  | 0.7591987  | 0.01488824 | 0.0989680   | 0.02667871 |
| 0.3687089    | 0.5232154  | 0.9275183  | 0.1904504  | 0.2481183  | 0.02803215  |            |
| 0.4963624    | 0.09220102 | 0          | 0.5721473  | 0.06382387 | 0.1819590   | 0.1027241  |
| 0.2279673    | 0.09929027 | 0.2135094  | 0.1734521  | 0.3662508  | 0.08323882  | 0          |
| 0.9055158    | 0.0262473  | 0.07194306 | 0.5632874  | 0.3029893  | 0           | 0.3940603  |
| 1.9817140    | 0.1538945  | 0.1033559  | 0          | 0.4055588  | 3.3373320   | 0.8802974  |
| 0.3924116    | 0.06870506 | 0.9435896  | 0.1139058  | 1.98008    | 0.2652513   |            |
| 0.1481720    | 0.2965198  | 6.5867720  | 0.1112444  | 0.6176163  | 0.005944145 | 0.1696411  |
| 1.1359850    | 0.4050222  | 0.5303759  | 0.4858429  | 0          | 0           | 0.2419515  |
| 0.2167905    | 0.94734    | 0.2164209  | 0.9701793  | 0.07085209 | 0.9319193   |            |
| 0.5055392    | 0.1322572  | 3.1610570  | 0.3902673  | 0.1467877  | 0.1322572   |            |
| 0.4154678    | 0.1155646  | 0.8784614  | 2.5137090  | 0.4714119  | 0.1100445   |            |
| 0.1667692    | 0.05119635 | 0.2030388  | 2.3944440  | 0.1437     | 0           | 0.6189522  |
| 0.04578135   | 0          | 0.4304937  | 0.04433203 | 4.1216880  | 0.7248113   | 0.2153025  |
| 0.3042339    | 0.9725488  | 1.4685710  | 0.1128493  | 0.2916889  | 0.58614     | 0.3573179  |
| 0.2368786    | 0.1234198  | 0.3797324  | 1.1621250  | 0.03511254 | 0.3846620   | 0.1521169  |
| 0.03101798   | 0.1925038  | 0.1529313  | 0.2179621  | 0.3694992  | 0.3131295   |            |
| 0.3650029    | 0.3024394  | 0.1941787  | 1.0789410  | 0.4185724  | 0           | 0          |
| 0.3388798    | 0.5778229  | 2.1412770  | 0.6166787  | 0.7877931  | 0.3708147   |            |
| 0.1527826    | 0.2616077  | 0.7214031  | 0.0362901  | 0.1060414  | 0.4131517   |            |
| 0.2386597    | 0.5223884  | 0          | 0.9872548  | 0.07856866 | 0           | 0.2058182  |
| 2.7011190    | 0.5147309  | 0.6210341  | 0.9513360  | 0.2350853  | 0.8026207   | 0.2514284  |
| 0.04975194   | 0.6376375  | 0.04508769 | 0.2492807  | 0          | 0.1017513   | 0.8638106  |
| 0.06860606   | 0.1055712  | 0.1089533  | 0.04517325 | 0.3996262  | 1.993363    |            |
| 0.06504454   | 0.1817275  | 0.04304937 | 0.1814966  | 0          | 0.2415026   | 0.9479188  |
| 0.1874512    | 0.03694718 | 0.5752841  | 1.9513360  | 0.2144712  | 0.0555573   |            |
| 0.5713513    | 0.1329218  | 0.02499087 | 0.4037599  | 0.9926549  | 0.838461    |            |
| 0.05813505   | 0.9621843  | 0.1282207  | 0.03440217 | 2.4542580  | 0.03371998  |            |
| 1.9063642    | 0.3253330  | 0.09357391 | 0.1874512  | 0          | 0.5933035   | 0.03097091 |
| 0.03191193   | 0.2554667  | 0.0117475  | 0.3975512  |            |             |            |
| TCGA-E7-A541 | 778        | 1          | 0.1692976  | 0.1991481  | 0           | 0.2975353  |
| 47.713120    | 0.18457    | 0.3089627  | 0.1165359  | 0          | 0.2698485   | 0.09076143 |
| 0.9414274    | 0.2195707  | 0.06902702 | 0          | 0.00794125 | 0.2581333   | 0.01008672 |
| 0.1944963    | 0          | 1.98937531 | 0.001380   | 0.2494171  | 0.01820045  | 0          |
| 1.8862170    | 0.2243589  | 0.3387146  | 0          | 0.5741441  | 0.1420497   | 0.1263495  |
| 0.2444643    | 0.2321536  | 0.1437135  | 0.06298825 | 0.07473256 | 0.06580701  |            |
| 0.52473      | 0.1566486  | 6.46981    | 0.05370559 | 0.1594050  | 0.04204273  | 1.023      |
| 0.8384588    | 2.9361890  | 0.09008029 | 0.6088579  | 0.3891311  | 0           | 0.5904242  |
| 0.02715997   | 0.9446962  | 0          | 0.1710670  | 0.5292749  | 0.10912     | 0.03175126 |
| 0.2663866    | 0.3552744  | 0.3143227  | 0.1640528  | 0.04504015 | 0.127018    |            |
| 0.09864415   | 0.5081375  | 0.6595164  | 6.0795420  | 0.3520938  | 0.02633724  |            |
| 0.06360247   | 0.2695185  | 0.07438079 | 0.07657543 | 0.2257655  | 0.06436032  |            |
| 0.3975582    | 0          | 0.03284049 | 0.08245574 | 0.3229560  | 0.1311825   | 0.1231097  |
| 0            | 0.1669157  | 0          | 0.01727328 | 0.4305008  | 0.2618880   | 0.3171688  |

|                           |                    |                    |                           |                            |
|---------------------------|--------------------|--------------------|---------------------------|----------------------------|
| 1.3755020.007958362       | 0.1042246          | 0                  | 0.08179352                | 3.3653831.4280330.04396776 |
| 0.1247086                 | 0.3275727          | 0.1531509          | 0.8688030.0334351         | 0 0.2135801                |
| 3.3149960.1121794         | 0.2264755          | 0.02397643         | 0 0.09961161              | 0.63533                    |
| 0.2368550.4199370.0923323 | 0.1202324          | 0.3006246          | 1.4319610.08197973        |                            |
| 0.4776513                 | 0.49104            | 0.9889679          | 0.1786190.04271601        | 0.5097884 0                |
| 0.7406933                 | 0.3279563          | 0.2422170.08891259 | 0.2513759                 | 0.1748039 0                |
| 0.9542916                 | 0.09507485         | 0 0.1261282        | 0 0.1535591               | 0.7893787 0                |
| 0.03828772                | 0.3120773          | 0.1870628          | 0.2308308                 | 0 0.2604673 0              |
| 1.2182350.9535350.1240641 | 0.03834888         | 0.8101627          | 1.1691430.1880138         |                            |
| 0.2639723                 | 0.2728             | 0.6756022          | 0 0.05531428              | 0.08836711 1.125481        |
| 0.1062230                 | 0.07669776         | 0.01563935         | 0.2803982                 | 0.05140556 0.1343186       |
| 0.3193756                 | 0.5291137          | 0.4498644          | 1.3070630.1522973         | 0.6879026                  |
| 0.1055226                 | 0.04309946         | 0 0.9798531.0679   | 0.1748039                 | 0.7808883                  |
| 0.02245687                | 0.4640290.5856633  | 0.09348286         | 0.1120485                 | 0.04396776                 |
| 0.4041481                 | 0 0.1222088        | 0.2146247          | 0.1804992                 | 0.1874977 0                |
| 0.8824218                 | 0.3169162          | 0 0.1383654        | 0.2767189                 | 0.1297643 1.148132         |
| 0.52473                   | 0.1106286          | 0.6214781          | 0.08006581                | 0.1755954 0.8373093 0      |
| 0.2932719                 | 0 0.08845394       | 0.1838040.4150962  | 0 0.2746728               | 0                          |
| 0.5469084                 | 1.7304260.06559125 | 0.2356135          | 0 0.03050368              | 0 0.1180764                |
| 0.2731103                 | 0 0 0              | 1.3774160.03089627 | 0.0840364                 | 0 0.4021172                |
| 0.04032148                | 0.1644274          | 0.9658756          | 0 0 0.4945256             | 0.2154973                  |
| 0.06938265                | 0.6519213          | 0.0340034          | 1.1721874.1035360.1665184 | 0.4320612                  |
| 0 0.2991452               | 0.1249249          | 0 1.0143550        | 0.2004464                 |                            |
| TCGA-XF-A8HE              | 3817               | 0 0.132874218      | 0.157881382               | 0.107084763 0.31409435     |
| 0.022657004               | 77.281493466       | 0 0.321912935      | 0.511925809               | 0.203253119                |
| 0.043766699               | 0.182376622        | 0.356173235        | 0.875715398               | 0.111696264 0.044492588    |
| 0.139800142               | 0.36703896         | 0.578849896        | 0.035184994               | 0.07269122 0 1.394559327   |
| 46.753647112              | 0.095159415        | 0.222206973        | 0.339855053               | 0.265000902 0.093460139    |
| 0.640869528               | 0.097827436        | 0.073845048        | 0.095159415               | 0.438103135 0.082584107    |
| 0.188887861               | 0.085275239        | 0.344918795        | 0.065388041               | 0.130457971 0.145382439    |
| 0.241028781               | 0.076266198        | 0.307366462        | 6.320821914               | 0.046834611 0.278022194    |
| 0.009165968               | 0.71369561         | 0.577253803        | 6.498386347               | 0.157111229 1.02399805     |
| 0.143569691               | 0.078703275        | 0.372471178        | 0.378572717               | 0.035527776 0.290764878 0  |
| 0.14918103                | 0.560466474        | 0 0.021299289      | 0.192931821               | 0.088520386 0.445427048    |
| 0.286128536               | 0.032731506        | 0.213623176        | 0.093844174               | 0.475551438 1.303649125    |
| 1.042222161               | 0.16748057         | 0.045935428        | 0.012325623               | 0.285401933 0.129729334    |
| 0.133557073               | 0.109378638        | 0.112252393        | 0.373364328               | 0 0.17183369 0.344124086   |
| 0.28163773                | 0.30506479         | 0.16103901         | 0 0.044353964             | 0.145560823 0.138489997    |
| 0.039164761               | 0.656991028        | 0.038063766        | 0 0.384683921             | 1.516378133 0.069401861    |
| 0 0.045511024             | 0.035664517        | 1.418497817        | 0.201946025               | 0.268398349 0.072502411    |
| 0.639342656               | 0.133557073        | 0.917155502        | 0.145787404               | 0.086867516 0.111753049    |
| 1.175413711               | 0.146741154        | 0.592502016        | 0.015681701               | 0.09945402 0.130301273     |
| 0.118724412               | 0.253193096        | 0.610351931        | 0 0.069900071             | 0.273561729 0.954933074    |
| 0.178728554               | 0.478251443        | 0 1.446676019      | 0.342687178               | 0.074502033 0.129328625    |

0 0.519051353 0.228798593 0.13690723 0.116305951 0.40189491 0.101626559  
0.193127963 0.455110244 0.041455587 0 0.109991618 0 0.044637679  
0.40493368 0.08424576 0.033389268 0.308095235 0 0.362337771 0.420805452  
0 0.038985235 0.874898499 1.080637973 0 0.234098241 0.632142471  
0.679710105 0.146700829 0.197314526 0.594746342 0.70700053 0.052077292  
0.156771847 0.051374408 0.394619516 0.123510745 0.037585406 0.126338733  
0.013638483 1.053336918 0.044828846 0.202322662 0.41777304 0.520958047  
0.285316133 0.379946846 0.136607316 0.440738342 0.322078019 0.112756219  
0.351581349 0.213623176 0.260757115 0.152439839 0.283742957 0.039167579  
0.613875199 0.581529757 0.114132008 0.244283212 0.153370485 0.370064391  
0.319132183 0.146538838 0.352312532 0.262344251 0.105113328 0.03685752  
0.138120168 0.069092644 0 0.180994852 0.273731684 0.264045944 0.591643318  
0.838928173 0.165385685 0.466344152 0.104733541 0.196881548 0.154047618  
0.832644879 0.073071802 0 0.018512959 0.480865484 0.361989704 0.092838453  
0.287438049 0.27807495 0.334693385 1.032620565 0 0.365279324 0.075714543  
0.212808856 0.081143687 0.167326115 0.190535347 0 0 0.47830567  
2.273686016 0.053886927 0.073284963 3.461265111 0.093512323 0.061534956  
0.238984831 0.520696724 0 0.025561748 0.371208564 0.375854062 0  
0.479027277 0.088959226 0.81777622 1.346627572 0.150054846 0.235490115 0  
0.195654871 0.063549652 0 0.210614399 0 0.061694709  
TCGA-DK-AA6Q 413 1 0.055112009 0.137516794 0 0.11894799 0.056384437  
37.663345724 0.064003955 0.080111563 0.603465863 0 0.072612153  
0.047582539 0.295458712 0.544828439 0.059564656 0.123751115 0 0.215428463  
0 0.032835643 0 0.377530576 2.183600755 58.168613593 0.135322648  
1.046724274 0.33830662 0.065948379 0 0.691112096 0 0.229714372 0  
0.272566918 0.058719887 0.097930864 0.371379365 0.083970805 0.081362654  
0.111067539 0.118520734 0.114252674 0.237245991 2.08226897 4.222834409  
0.233106128 0.069188871 0 0.444027439 0.383082497 6.302073654 0.048873564  
0.660678508 0.178644456 0 0.681570114 0 0.009823863 0.603000226  
0.195372073 0.185626673 2.010127367 0.039469106 0.002650281 0.215569462  
0.275365854 0.085268772 0.059338519 0.04072797 0.098449016 0.204348825  
0.336210761 1.001908068 0.620228804 0.104198439 0.042868255 0.046010497  
0.250677881 0.020177854 0.041546427 0.272200729 0.139676192 0.099552649 0  
0.035635581 0.153383374 0.116814394 0 0.400763227 0 0 0.031962711  
0.028720628 0.007497369 0.194642165 0.047362927 0 1.182814475 0.647720027  
0.030224974 0 0.056629586 0.044377529 0.852090039 0.586325622 0.095419816  
0.045107549 0.47393702 0 0.628498521 0.072561587 0 0 1.014577618  
0.060863574 0.307188794 0.019512816 0.061875558 0.270224168 0.098486237  
0.23628704 0.531624689 0 0 0.127647816 1.85851017 0.059304746  
0.518304689 0.059203659 0.525030894 0.0387643 0.185406475 0.241386345 0  
1.17689697 0.142347594 0.06814173 0.144720054 0.227308986 0 0.288372064  
0.695734919 0 0 0.273726197 0 0.055542878 1.05810794 0.052413702  
0.789382114 0.926463923 0 0.801526454 0.261805123 0.329741896 0.048509515  
0.311040117 0.624461336 0.033655827 0 0.416423602 0.930343206 0.563728159

0.032735922 0.049336382 0.439862079 0.129600049 0.105038749 0.063925423  
1.05759653 0.11526376 0.327373911 0.08322559 0.03394086 0.234048605  
0.111561498 0.119250502 0.635356336 0.36115705 0.044377529 0.094553937  
0.089712269 0.776918186 0.286259448 0.374141612 0.079540793 0.354416459  
0.185406475 0.063227208 0.661190194 0.048736407 0.363084633 0.245394875 0  
0.106386971 0.429389172 0.131563686 0.039709771 0.116033896 0.239741347 0  
0.06539651 0.045861989 0.147311648 0 0.15661088 0.225212765 0.076188106  
0.187744935 0.453036692 0.332144387 0.154342652 0.784154418 0.115840399  
0.027220073 0.199349479 0.098672764 0.090923594 0 0.011517882 0.234134309  
0 0.057759667 0.178830273 0.098859999 0.17699575 1.387005572 0.071173797  
0.085222278 0.09421197 0.099299656 0.10096748 0.048047236 0 0.102557519  
0.30995397 0 0.533803479 0.067051763 0.060792555 1.111450017 0.334528769  
0.027345801 0.123196132 0.343008761 0.262134438 0.031806605 0.135851941  
0.60798012 0.150575779 2.973729654 0 1.475466178 0.822292625 0.174667904  
0.32232363 0 0.162302865 0.429265035 0 1.397698713 0.192817245  
0.140739542

TCGA-UY-A78N 2641 1 0.09782246 0.07845716 0.1330360.1809684  
0.20641740.3289 0.04260204 0.4088137 0.7587221 0.1683401 0.01208295  
0.9745135 0.2622160.8612852 0.2510988 0.3663328 0.05789326  
0.1835425 0.2663446 0.1748474 0.04013665 0.2512903 3.603203  
93.084480.3602916 0.03943677 0.3377733 0.2194814 2.0899731.645439  
0.1620470.2446424 0.05254252 0.3887675 0.6351294 0.2085899  
0.8122153 0.2297794 0.1805209 0.0796151 0.1439383 0.08555443  
0.3789952 0.02828553 4.8486050.3491080.1381596 0.03036608 1.034431  
0.2549858 11.770220.3578412 0.5654032 0.1405283 0 0.9708406  
0.5016718 0.1220598 0.9632795 0 0.1235560.9283891 0.2627126  
0.1887554 0.2021854 0.1832879 1.5324180.07899331 0.01626551  
0.4521516 0.1943111 0.3222536 1.61958 2.02664 0.1618310.1236464  
0.2347941 0.1807598 0.05372279 0.02765396 1.2139130.1394560.5521985  
0 0.1185980.4764405 0 0.2210805 0.2222953 0 0.03673524  
0.04254977 0.2485197 0.08982661 0.2159282 0.4413572 0.3428622  
1.0295460.7872858 0.01437016 0.02509267 0 0.8566131 2.795311  
1.8398330.1587823 0.04503645 0.4619235 0.1106158 0.8256682  
0.2897888 0.03597309 0.03085237 4.2887130.04051176 0.7769849 0  
0.1235560.4676502 0.4261010.3780152 0.45496 0.06668858 0.1157865  
0.1195795 1.8150210.1480282 0.4344341 0.4334758 0.6490136  
0.02580213 1.6043230.2744789 0.04816398 0.8884462 0.1894976  
0.2170619 0.03210932 0.1210404 0.2525102 1.9834321.3785070  
0.1068661 0.06073216 0.1118647 0.07394043 1.2408980.2093243 0  
0.5528757 0 0.23341 0.2613924 0.4703173 0.0322887 1.345716  
1.2863950.4032333 0.0830944 0.6159514 0.9570245 0.4395509  
0.7844237 0.7552987 1.8217370.04313192 0.1598067 0.04254977  
1.0894510.02557379 0.2179052 0.04308599 0 0.07789322 0.07425709  
0.3351390.9611437 0.3883253 0.1476919 0.3461513 0.1508562

|                                   |                           |                    |                    |                   |                    |            |           |
|-----------------------------------|---------------------------|--------------------|--------------------|-------------------|--------------------|------------|-----------|
| 4.3499680.2286466                 | 0.3424225                 | 0.0264718          | 0.0589763          | 0.1851142         |                    |            |           |
| 0.08417006                        | 0.5298275                 | 0                  | 0.5722678          | 0.7161774         | 0.6616920.1315096  |            |           |
| 0.0952694                         | 0.7151621                 | 0.6872177          | 0.1489513          | 0.2963547         | 0.1303687          |            |           |
| 0.3659656                         | 0                         | 0.3595275          | 0.05722453         | 0                 | 0.09993678         | 0.2192549  |           |
| 0.6873130.4146291.3264830.2739544 | 0.2922895                 | 0.1734867          | 0.2717717          |                   |                    |            |           |
| 1.8525590                         | 0.03026009                | 0                  | 0.2964374          | 0.2885991         | 0.1748894          | 0.03844575 |           |
| 0.3174193                         | 0.06580278                | 0.2286923          | 1.9332720.09474881 | 0.2079927         | 0                  |            |           |
| 0.1101590                         | 0.0959430.2564362         | 0.0682639          | 0                  | 0                 | 1.7410090.06694607 |            |           |
| 0.08092897                        | 0.3698993                 | 0.24203            | 0.05460539         | 0.2460039         | 0.4312561          |            |           |
| 0.1090505                         | 0.1270259                 | 0.5154236          | 0.06225864         | 0.07516921        | 1.041999           |            |           |
| 0.04911907                        | 0.9482283                 | 3.1497350.1403159  | 0.09751986         | 0.05145113        |                    |            |           |
| 0.1620470.1428628                 | 0.02324267                | 0.3953904          | 0.2053475          | 0.2129056         |                    |            |           |
| TCGA-DK-AA75                      | 340 1                     | 0.08122744         | 0.1158175          | 0.0981931         | 0.1502681          | 0          |           |
| 56.588910                         | 0.03935777                | 0.6917748          | 0                  | 0                 | 0.1078924          | 0.2177325  |           |
| 1.7565650.1170534                 | 0.3167860.0640960.1778065 | 0.05897619         | 0.1935807          | 0                 |                    |            |           |
| 0.2225712.318906103.99340.1495851 | 0.05821608                | 0.1246542          | 0.09719874         |                   |                    |            |           |
| 0.1713996                         | 2.3114460.1794089         | 0                  | 0                  | 0.2295576         | 0.4110885          | 0.1154692  |           |
| 0.3127780.06875627                | 0.1798759                 | 0.1636981          | 0.07968            | 0.04209814        | 0.6993352          |            |           |
| 0                                 | 20.188680.0858915         | 0.2039495          | 0                  | 0.8725796         | 0.2823052          | 5.4191790  |           |
| 0.5564276                         | 0.1196805                 | 0                  | 1.26572            | 0.1388553         | 0.007239504        | 6.6655390  | 0         |
| 1.6929420                         | 0.007812291               | 0.3177194          | 0                  | 0.8168830.6121971 | 0                  | 0.1305901  |           |
| 0.05736795                        | 0.1982112                 | 0.2109533          | 2.07757            | 0.2047653         | 0.1263637          |            |           |
| 0.01130218                        | 0.1231548                 | 0.02973935         | 0                  | 0.8826092         | 0                  | 0          | 0.1242508 |
| 0.05252189                        | 0.06593585                | 0.1721682          | 0                  | 0.09844488        | 0                  | 0          | 0.1570286 |
| 0.04233021                        | 0.03315024                | 0.2677505          | 0.06980637         | 0.1084562         | 0.1515917          |            |           |
| 0.3735584                         | 0.01909175                | 0                  | 0                  | 0.06540631        | 2.0632024.19736    | 0          | 0.1662056 |
| 1.4219820                         | 0.9019426                 | 0.05347284         | 0                  | 0                 | 9.55468            | 0          | 0.7244057 |
| 0.009586393                       | 0.09119597                | 1.5134370.4354651  | 0.01832917         | 0.4477376         |                    |            |           |
| 0.1476673                         | 0.0640960.1463273         | 1.2348790.04370347 | 1.1883030          | 0.3996666         |                    |            |           |
| 0                                 | 0.2732634                 | 0.3409462          | 0                  | 2.6864870.3147008 | 0.1362998          | 0          | 0         |
| 0.1863762                         | 0.07083672                | 1.2161920.3041069  | 0                  | 0                 | 0                  | 0.2455874  |           |
| 1.2624560                         | 0                         | 0.2825129          | 0                  | 0.3691683         | 0                  | 0.2082830  | 0.3438224 |
| 0.7860087                         | 1.73614                   | 0.06133147         | 1.7730570.7479254  | 0.3560815         | 0.03618615         |            |           |
| 0.2181449                         | 0.2160985                 | 0.1910124          | 0.02211607         | 0.09421718        | 0.7793751          |            |           |
| 0.2265103                         | 0.2067873                 | 0.01362922         | 0                  | 0.03449551        | 0.08221307         | 0.05858622 |           |
| 0.3405189                         | 0.3139177                 | 0.06540631         | 0.6271171          | 0.2366103         | 3.16578            |            |           |
| 0.08438132                        | 0                         | 0                  | 0.1305901          | 0                 | 0                  | 1.58948    | 0         |
| 0.08970444                        | 0                         | 0                  | 0.9372151          | 0.1170534         | 0.04886224         | 0.2927719  |           |
| 0.09622432                        | 0.1499328                 | 0                  | 1.88168            | 0                 | 0                  | 0.1106441  | 0.1354093 |
| 0.9181055                         | 0.3496676                 | 0.2274796          | 0.7627848          | 0.6189058         | 0.1203558          |            |           |
| 0.1243057                         | 0                         | 0.1340087          | 0                  | 0.05092727        | 0.5112317          | 0.1106441  |           |
| 0.08512972                        | 0                         | 0                  | 0.1994866          | 0.5685449         | 0.1049003          | 0.1256058  | 0         |
| 0.1951385                         | 0.4464361                 | 0.1298274          | 0.08735723         | 0.1511555         | 0                  | 0.2699016  |           |
| 0.6294017                         | 0                         | 0.08959977         | 0                  | 0.2572429         | 0.03224313         | 0.3318421  |           |

|              |             |            |            |            |             |            |
|--------------|-------------|------------|------------|------------|-------------|------------|
| 0.3089455    | 0.3863497   | 0.09375703 | 0.2903290  | 0.1378582  | 0           | 1.467391   |
| 0.1087635    | 3.8243531   | 1.1204770  | 0.04438555 | 0.04318729 | 0           | 0.3588178  |
| 0.05146582   | 0.2575017   | 0          | 0.07542928 |            |             |            |
| TCGA-ZF-AA5P | 372         | 0          | 0.1476240  | 0.08770355 | 0.05948588  | 0.1365498  |
|              | 6.444047    |            |            |            |             |            |
| 26.318010    | 0.8572106   | 0.3934118  | 0.1197374  | 0.3387230  | 0.1296668   | 8.598339   |
| 0.1319035    | 0.6688857   | 0.06204758 | 1.6515940  | 0.1164891  | 0.007694006 |            |
| 1.2147550    | 0.009772681 | 0.1076805  | 0          | 2.43895    | 24.213420   | 0.06041294 |
|              |             |            |            |            |             | 0.4055774  |
| 0.3775809    | 0.05888349  | 38.211181  | 1.49522    | 1.9020190  | 0.1057226   | 0.5910354  |
| 2.4707340    | 0.05246387  | 3.2685740  | 0.1416199  | 0.9686197  | 0.1830815   | 0.1837994  |
| 0.02550327   | 0           | 0.2656001  | 2.87497    | 0.1040670  | 0.03088842  | 0.02036688 |
| 0.3964599    | 0.3847993   | 4.5766770  | 0.04363786 | 0.5477658  | 0.9570403   | 0          |
| 0.6572396    | 0           | 1.2747852  | 1.536090   | 0.2325898  | 0.2209879   | 0.5494247  |
| 2.5725841    | 1.6801180   | 0.2449695  | 0          | 0.4187378  | 3.4438130   | 0.05091084 |
|              |             |            |            |            |             | 0.3076585  |
| 3.8489830    | 1.801160    | 0.4259887  | 0.6041294  | 0.06202395 | 1.2886223   | 1.08501    |
| 0.1865195    | 0.2702438   | 0          | 0.1701284  | 0.06235652 | 0.6222148   | 0.2007248  |
| 0.06363606   | 0.2054277   | 0.3129011  | 0          | 0.1789152  | 0.08132511  | 0          |
| 0.02853863   | 0.1795072   | 3.161910   | 0.5503373  | 3.9751712  | 4.4967279   | 5.5896940  |
|              |             |            |            |            |             | 0.6537659  |
| 0.03084234   | 0.1346395   | 0          | 25.438271  | 4.129290   | 0.5609079   | 1.9595480  |
|              |             |            |            |            |             | 0.3624776  |
| 0.3324870    | 0.07419133  | 0.7383803  | 0.1619706  | 0.7238272  | 0.04138609  |            |
| 2.3176630    | 0.1097122   | 0.07549731 | 0          | 0.2412757  | 0.1758713   | 2.961041   |
| 0.2034313    | 0.8051186   | 0          | 0.1139732  | 1.5642     | 0.02647579  | 0.73702    |
| 0.1057226    | 1.7772640   | 0.03461158 | 36.957770  | 0.08980301 | 0.1292166   | 0.9995595  |
| 0.1906474    | 0.1694881   | 0.2584331  | 0          | 0.05645384 | 0           | 1.1557260  |
|              |             |            |            |            |             | 0.04605739 |
| 1.0034690    | 0.5702727   | 1.2004640  | 0.04959271 | 0.7198137  | 0           | 0.03709566 |
| 0.2624266    | 0           | 0.2683729  | 0.1753189  | 0.08411928 | 0.08662563  | 0.9720171  |
| 2.1610711    | 0.0517630   | 0.03715492 | 0.2065629  | 0.3020647  | 0.3259709   | 5.560818   |
| 0.0440511    | 0.4363786   | 0          | 0.1071842  | 0.02853863 | 0.1911081   | 0.06861056 |
| 0.08351519   | 0.1568763   | 0.07576215 | 0.4179511  | 0          | 0.6861754   | 0.5672922  |
| 0.2315149    | 0.07924695  | 0          | 0.2318731  | 1.0813391  | 1.12461     | 0.4593335  |
| 0.2130594    | 0.4746731   | 0.4138609  | 0.1129077  | 0.5788953  | 0.0217577   |            |
| 0.2660791    | 0.4943938   | 8.1152830  | 0.06785    | 0.2555932  | 1.4879480   | 0.1418231  |
| 0.09620323   | 0.1284351   | 0.1165864  | 0.06271599 | 0.08189782 | 0.2411393   |            |
| 0.6908608    | 0           | 0.2010863  | 2.1468290  | 0.5028969  | 0.2528150   | 0.5083930  |
|              |             |            |            |            |             | 0.1071842  |
| 0.5741229    | 0.1163595   | 0.2187365  | 16.868320  | 0.2202555  | 0.2435495   |            |
| 0.06120784   | 6.3143760   | 0.2709934  | 0.1005431  | 0.2062881  | 0.1064484   |            |
| 0.3089428    | 0.1301462   | 0.2380601  | 1.1438840  | 0.2029137  | 0.7991331   |            |
| 0.2659858    | 0           | 0.03575005 | 0.05292146 | 0.09157079 | 0           | 0.07153465 |
| 0.6196040    | 0.05428     | 0.1240479  | 0.1947988  | 0.1220816  | 0.3337884   | 0.22119    |
| 0.2340526    | 0.02839924  | 0.1940775  | 0.5846063  | 0          | 0.5672922   | 0.1647237  |
| 1.18112      | 14.296170   | 0.0107556  | 0.05232617 | 0.2760710  | 0.07245788  | 0.1210355  |
| 0.06235652   | 0.2963921   | 0.01147741 | 0.1370863  |            |             |            |
| TCGA-GC-A3WC | 540         | 0          | 0.2709727  | 0.3380687  | 0.1637849   | 0.5012906  |
| 0.8085843    | 55.921880   | 0.2622436  | 0.4485965  | 0.6318821  | 0.8289952   |            |
| 0.6694064    | 0.9478058   | 0.4842335  | 0.9208349  | 0.2440544  | 0.1147525   |            |

|                           |                    |                           |                            |                           |                     |
|---------------------------|--------------------|---------------------------|----------------------------|---------------------------|---------------------|
| 0.1069113                 | 0.3742545          | 0.4262767                 | 0.01793834                 | 0.1235337                 | 0.06187428          |
| 1.72133870.589080.2079217 | 0.5340703          | 0.2079217                 | 0.4863788                  | 2.477733                  |                     |
| 1.6772350.3491271         | 0.3011870.09703012 | 1.0210640.5714087         | 0.2568015                  |                           |                     |
| 0.5651856                 | 0.3134712          | 0.2000204                 | 0.08401427                 | 0.05793305                | 0.1404383           |
| 0.1166482                 | 0.03482321         | 9.5378550.1910213         | 0.02834877                 | 0.09346159                |                     |
| 0.6670821                 | 0.9417629          | 5.2855880.6407993         | 1.6628710.0931586          | 0                         |                     |
| 0.5026678                 | 0.3474135          | 0.2066235                 | 0.5435484                  | 0                         | 0.3042275 0.4370176 |
| 0.09703012                | 0.2084928          | 0.3211830.3610423         | 0.3843092                  | 0.1945023                 |                     |
| 0.07342492                | 0.2984978          | 0.6299528                 | 0.4849001                  | 2.9322290.8316868         |                     |
| 0.4838569                 | 0.2107731          | 0.3204822                 | 0.4621964                  | 0.09920973                | 0.4085479           |
| 0.2230578                 | 0.2861478          | 0.2991247                 | 0.4835805                  | 0.4964332                 | 0.1152173 0         |
| 0.4665929                 | 0.6568193          | 0.07463856                | 0                          | 0.3055754                 | 0.1412125 0.4423535 |
| 0.3721703                 | 0.1164361          | 0.2412048                 | 1.0535541.2692590.03184479 | 0                         |                     |
| 0.04640571                | 2.6183261.69576    | 0.51479                   | 0.4300602                  | 0.2464257                 | 0.5132068           |
| 0.2383196                 | 2.1956530.2973068  | 0.2657256                 | 0.03798332                 | 2.8289410.0498753         |                     |
| 0.6041498                 | 0.01598998         | 0.4056366                 | 0.3100133                  | 0.3631751                 | 4.755773            |
| 0.7468208                 | 0.08210241         | 0.1425484                 | 0.3874161                  | 1.8849950.2551390.8337297 |                     |
| 0.1940602                 | 1.5649470.4447214  | 3.6843820.1236291         | 0.1185924                  | 1.117317                  |                     |
| 0.2332965                 | 0.3509909          | 0                         | 0.8940996                  | 0.3108732                 | 0.4332341 1.7103820 |
| 0 0 0                     | 0.3186064          | 0.6606306                 | 0.4295096                  | 0.9192327                 | 0.5235866           |
| 0.1663374                 | 0.5747169          | 0.5363474                 | 0.1930075                  | 0.1192549                 | 1.5930321.54637     |
| 0.02757962                | 0.2046003          | 0.8720647                 | 1.5940660.6775310.7980674  | 1.091589                  |                     |
| 1.8422980.5310106         | 0.4795613          | 0.02619218                | 0.8460239                  | 0.1574235                 |                     |
| 0.1916214                 | 0.2803781          | 0.06953299                | 1.5535280.4113911          | 0.4777475                 |                     |
| 1.4199530.5463765         | 0.6545814          | 0.5811241                 | 0.2708472                  | 0.9237722                 |                     |
| 1.2667230.2299457         | 0.1303611          | 0.5082530.4937832         | 0.2590610.6891099          |                           |                     |
| 0.07987512                | 0.5726117          | 0.5362438                 | 0.3823773                  | 0.2864483                 | 0.1172892           |
| 0.2156225                 | 0.1301624          | 0.1833786                 | 0.4939530.05350032         | 0.2282531                 |                     |
| 0.03758209                | 0.3017902          | 0                         | 0.2138941                  | 0.3075883                 | 0.4517222 0         |
| 0.5568685                 | 1.6719580.1686369  | 0.7711003                 | 0.2254508                  | 0.1338347                 |                     |
| 1.0901070.1617169         | 0.1862707          | 0.05617533                | 0.2516920.2913488          | 0.1230353                 |                     |
| 0 0.1465443               | 0.2430356          | 1.1006051.0598930.1749724 | 0.3259027                  |                           |                     |
| 0.5018194                 | 0.2441164          | 0                         | 0.1640534                  | 0.4857025                 | 0 0.0883461         |
| 0.3939184                 | 3.3682180.2197851  | 0.0996342                 | 0.7400164                  | 0.4171591                 |                     |
| 0.1478981                 | 0.4281858          | 1.04625 0                 | 0.05212851                 | 0.8293735                 | 0 0.3701727         |
| 0.8641707                 | 0.3023602          | 1.4592424.3227240.3010738 | 0.2401195                  | 0                         |                     |
| 0.3325020.1295979         | 0                  | 1.80394                   | 4.1186930.07339214         |                           |                     |
| TCGA-K4-A4AC 278 1        | 0.01673117         | 0.03578401                | 0                          | 0.09285635                | 0.2310857           |
| 31.065420.05829188        | 0.1702446          | 0.2442707                 | 0                          | 0.04959888                | 0.5967035           |
| 0.08969677                | 2.0468450.2260366  | 0.2372776                 | 0.1188220.1569619          | 0.03644362                |                     |
| 0.0199368                 | 0.05491851         | 0.4126052                 | 1.14181518.772060.1694628  | 0.5575957                 |                     |
| 0 0.06006278              | 1.4828             | 1.3314940                 | 0                          | 0.03594666                | 0.9929661 0.1336985 |
| 0.05351458                | 0.09663868         | 0.2719174                 | 0.1543779                  | 0.2334352                 | 0.07574967          |
| 0.06503508                | 0.3889311          | 0.1161083                 | 2.1633550.1061512          | 0.03150703                | 0                   |



|              |            |            |            |             |            |            |
|--------------|------------|------------|------------|-------------|------------|------------|
| 0.3369999    | 0.6977881  | 2.8095150  | 0.3008579  | 0.02958204  | 0          | 0.620743   |
| 0.2145099    | 0.0730682  | 1.09837    | 0          | 0.2988951   | 0.03594666 | 0.06758514 |
| 0.1204757    | 0.1504744  | 0.1941473  | 0.1621284  | 0.007418636 | 0.08966287 |            |
| 0.1329368    | 0.2694608  | 0.3476161  | 0.3081142  | 0.06326612  | 0.0520566  |            |
| 0.04888831   | 0.07610199 | 0.01837707 | 0.1135158  | 0.0495816   | 0.06360535 |            |
| 0.1511134    | 0.02559309 | 0.1622763  | 0.05238547 | 0.2127784   | 0.04321457 | 0          |
| 0            | 0.0502644  | 0.03881357 | 0.05231488 | 0.01365652  | 0.2718158  | 0.04313599 |
| 0            | 0.5043996  | 0.8720466  | 0.05112255 | 0           | 0          | 0.4445873  |
| 0.6102842    | 0.08690402 | 0.2738793  | 0.2774830  | 0.8736750   | 0.09912868 | 0          |
| 0.08442988   | 1.5960540  | 0          | 0.01184759 | 0.05635344  | 0.3937726  | 0.08969677 |
| 0.1812206    | 0.4841795  | 0          | 0          | 0.03875194  | 1.2764220  | 0.06751507 |
| 0.10784      | 0.6936153  | 0.1765238  | 0.6332241  | 0.1282421   | 0.1318044  |            |
| 0.6535757    | 0.1944655  | 0.1551509  | 0          | 0.04140453  | 0.1151689  | 0.2626361  |
| 0.5894359    | 0.09395959 | 0          | 0.1246487  | 0           | 0.4046874  | 0.7801190  |
| 0            | 0.2153097  | 0          | 0          | 0.2384402   | 0.04290198 | 0          |
| 0            | 0.1685598  | 0.4621714  | 0.6258809  | 0.4770301   | 0.4043999  | 0.5341418  |
| 0.05901691   | 0.06833179 | 0          | 1.3186810  | 0.1749616   | 0          | 0.05053205 |
| 0.2771090    | 0.1810132  | 0.2630243  | 0.3457933  | 0.3637533   | 0.08611541 |            |
| 0.1548111    | 0.5896514  | 0.7299937  | 0.1277817  | 0.03622106  | 0.8069659  |            |
| 0.2110747    | 0          | 0.4969462  | 0          | 0.2526901   | 0.1203432  | 0.2032498  |
| 0.04152531   | 0          | 1.8173030  | 0.0723317  | 0.04529073  | 0.1497226  | 0.2973032  |
| 0.1235322    | 0          | 0.06708236 | 0          | 0.04754468  | 0.3418559  | 0.1653083  |
| 0.2564843    | 0.5673321  | 0.3889311  | 0.2030430  | 0.9712740   | 0.07912661 | 0.0495816  |
| 0.3700998    | 0          | 0.1242136  | 0          | 0.2587524   | 0.1579547  | 0.1367423  |
| 0.05260487   | 0.2171606  | 0.1350558  | 0.2086113  | 1.0281430   | 0.1034888  |            |
| 0.08580397   | 0.06029173 | 0          | 0.02917282 | 0.02699067  | 0          | 0          |
| 0.7778622    | 0.06106769 | 0.04152531 | 1.2020560  | 0.2119468   | 0.03486743 |            |
| 0.2437479    | 0.2429752  | 0.05968502 | 0          | 0.3526241   | 0.1703756  | 0.06856878 |
| 0.9902731    | 0          | 0.3706999  | 0.9043401  | 0.09325353  | 0.2134965  | 0          |
| 0.07390902   | 0.03086487 | 0          | 0.5091841  | 0           | 0.1165265  |            |
| TCGA-FD-A3SL | 712        | 1          | 0.1293376  | 0           | 0.05211727 | 0.02658559 |
|              | 1.49966915 | 7808       |            |             |            |            |
| 0.1502053    | 0.3237895  | 0          | 0.1978432  | 0.02840119  | 4.5210940  | 0.1155644  |
| 0.1864640    | 0.06989354 | 0.7922880  | 0.1360791  | 0.02696375  | 1.4712120  | 0.01712424 |
| 0.07075643   | 0          | 8.99223417 | 0.285540   | 0.03308093  | 0.1699442  | 0          |
|              | 0          | 4.366682   |            |             |            |            |
| 1.2476240    | 0.4285062  | 0          | 0.4013819  | 0.2132212   | 0.9933413  | 0.04596508 |
| 0.2905193    | 0.08028523 | 0.2970223  | 0.06683454 | 0.1886838   | 0.02234413 | 0          |
| 0.09972847   | 2.0233330  | 0.04558803 | 0.08118666 | 0.05353201  | 0.1736749  |            |
| 0.1498371    | 2.9006750  | 0.07646473 | 0.6275787  | 0.4192451   | 0.07660846 |            |
| 0.2452593    | 0          | 0.3573489  | 0.99059    | 0.05094463  | 0.09680689 | 0.2567288  |
| 0.3396309    | 0.6903881  | 0.06132135 | 0.1292464  | 0.3668681   | 3.3925640  | 0.01274412 |
| 0.1694304    | 0.8068929  | 0.2209266  | 0.7091194  | 0.2205395   | 0.0815114  |            |
| 0.2794549    | 0.5878803  | 0.1634150  | 0.06313819 | 0           | 0.3619890  | 0.05463231 |
| 0.1557543    | 0          | 0.1393834  | 0.1549837  | 0.0913805   | 0.07423625 | 0.0522509  |
| 0.1425025    | 0.04317341 | 0          | 0.1797385  | 0.4310756   | 0.1065840  | 0.6298608  |

|                           |            |            |            |            |                                       |
|---------------------------|------------|------------|------------|------------|---------------------------------------|
| 1.0937264.3881230.7710538 | 0.40195    | 0.02949038 | 0.04429968 | 8.262229   |                                       |
| 0.3332826                 | 0.36038    | 0.6717973  | 0.2293611  | 0.3839881  | 0.09750168                            |
| 0.8409907                 | 0.05676282 | 0.3804993  | 0.1450381  | 4.1332920  | 0.2403048                             |
| 0.04070482                | 0.04840345 | 0.0422777  | 0.1540858  | 1.29064    | 0.2376426                             |
| 0.3135054                 | 0.03401978 | 0.1035535  | 1.4181080  | 0.01159809 | 0.8259262                             |
| 0.1389399                 | 0.7627590  | 11.095410  | 0.06294317 | 0          | 1.2687040.4454175                     |
| 0.06472785                | 0.1132103  | 0.03556344 | 0          | 0.15039    | 1.3163330 0.408185                    |
| 0.2141280.26294           | 0.04344958 | 0.1576623  | 0.04100171 | 0.06500112 | 0.2549106                             |
| 0                         | 0.4310699  | 0          | 0.1842482  | 0          | 0.5474647 0.5134577 2.501157          |
| 0.09765743                | 0.2533658  | 0.1323237  | 0.6383828  | 1.4340680  | 0.1543777                             |
| 0.7646473                 | 0          | 0.03521518 | 0.1750245  | 0.22653    | 0.06011165 0.2195101                  |
| 0.2097826                 | 0.05310189 | 0.7323576  | 0          | 0.1451119  | 0.3614696 0.3911852                   |
| 0.0694305                 | 0.1849170  | 0.0627920  | 0.4230490  | 0.3135054  | 0.2195101 0.03111122                  |
| 0.8317490.2538166         | 0.2967648  | 0.9641566  | 0.01906254 | 0.1688106  |                                       |
| 0.6448064                 | 1.9362130  | 0.05944531 | 0.1119662  | 0.3087553  | 0.3106380.02593427                    |
| 0.1500341                 | 0          | 0.04547359 | 0.0358765  | 0.3265066  | 0.4035218 0 0                         |
| 1.6302280.1835842         | 0.1328990  | 0.59389    | 0.1341531  | 0.7606422  | 0.05663661                            |
| 0.1916412                 | 3.2598560  | 0.07718883 | 0.03556344 | 0          | 2.0513 0.2035072 0                    |
| 0.1355511                 | 0.2797874  | 0.1160029  | 0.3502189  | 0.2107901  | 0.3340631                             |
| 0.08888921                | 0.07369928 | 0.1553585  | 0.07898392 | 0.06890758 | 0.02318299 0                          |
| 0                         | 0          | 0.7516420  | 0.07867896 | 0          | 1.14116 0.1479129 0.0727322 0.2060383 |
| 0.1192559                 | 0.02563252 | 0.1244069  | 0.1275276  | 0.4024351  | 0.02944776                            |
| 1.12214                   | 0.05772762 | 0.2786034  | 10.850390  | 0.03298149 | 0.2292222 0.1209368                   |
| 0.0634824                 | 0.04418441 | 0.1912131  | 0.1093379  | 0.01005569 | 0.1100964                             |
| TCGA-K4-A5RH              | 276        | 0          | 0.1095158  | 0.1003836  | 0.05673856 0.08682887                 |
| 0.8643419                 | 14.242570  | 0.2725403  | 0.3354438  | 0.1713110  | 0.2692327 0.02318966                  |
| 1.8671750.3145290         | 0.4204958  | 0.08454564 | 0.1747270  | 0.1851818  | 0.003669331                           |
| 0.51117                   | 0.1165167  | 0.1668994  | 0.4822778  | 3.40638    | 12.861180.1368541                     |
| 0.6980047                 | 0.5402137  | 0.08424599 | 0.5447155  | 0.7130821  | 3.343267                              |
| 0.1173798                 | 0.1176465  | 0.9119303  | 0.1375219  | 0.05004085 | 0.5647856                             |
| 0.07548545                | 0.1299213  | 0.1382456  | 0.08942618 | 0.07297624 | 0.06061414                            |
| 0.09047625                | 0.03371547 | 0.07444556 | 0.02946185 | 0.08741812 | 0.06302493                            |
| 0.1427329                 | 2.2423610  | 0.5023727  | 0.4909972  | 0          | 0.3714876 0.7221085                   |
| 0.05368409                | 0.6419206  | 0.02773097 | 0.02634772 | 0.06987331 | 0.01680665                            |
| 0.02708488                | 0.1063968  | 0.09380455 | 0.5446344  | 0.6064176  | 0 0.06707415                          |
| 0.1077333                 | 0.2519696  | 0.5688404  | 0.5762280  | 0.2662173  | 0.3468273                             |
| 0.04244953                | 0.06226681 | 0.1288814  | 0.05307363 | 0.1854527  | 0.1486915                             |
| 0.4521738                 | 0.0119659  | 0.1213941  | 0.1986615  | 0.1989666  | 0.1616377                             |
| 0.1137681                 | 0.3490612  | 0          | 0.04536764 | 0.09783804 | 0.03990642 0.4558516                  |
| 0.2016798                 | 0.03133443 | 0.6771663  | 0.6475556  | 0.03125652 | 0 0.04822778                          |
| 0.5291088                 | 1.0366720  | 0.3745019  | 0.2234730  | 0.4641836  | 0.2666786 0.03538242                  |
| 0.5634229                 | 0          | 0          | 0.05921204 | 3.4113160  | 0.1308065 0.06093197 0                |
| 0.1380795                 | 0.08387439 | 3.1632020  | 0.6144472  | 0          | 0 0.1147488 1.232488                  |
| 0.01893976                | 1.5939690  | 0.1764698  | 1.0981830  | 0.4456763  | 0.8684432 0.1199177                   |

|              |            |             |            |            |            |            |            |
|--------------|------------|-------------|------------|------------|------------|------------|------------|
| 0            | 1.057291   | 0.06061414  | 0.1326444  | 0          | 0.2323013  | 0.1615396  | 0.5525728  |
| 0.9025484    | 0          | 0.03418301  | 0.5827875  | 0          | 0.09460459 | 0.1501871  |            |
| 0.06695607   | 0.1415297  | 0.4788473   | 0.1440570  | 0.3413043  | 0.1393516  |            |            |
| 0.2005857    | 0.04131243 | 1.9535852   | 3.970430   | 0.04299375 | 0.1063168  | 0.09851144 |            |
| 0.6842707    | 0.06629828 | 0.2962152   | 0.3151247  | 0.2913573  | 0          | 0.051117   |            |
| 0.08166175   | 0.4825108  | 0.08180227  | 0.1194871  | 0.2598856  | 0.03613156 |            |            |
| 1.8836130    | 0.06770532 | 0.6394725   | 0.7255597  | 0.1511739  | 0.06039413 |            |            |
| 0.1025398    | 0.9859901  | 1.29208     | 0          | 0.06773978 | 2.4901280  | 0.1381614  |            |
| 0.3230793    | 0.8829082  | 0.01037642  | 0.2523318  | 0.5171089  | 0.4751412  |            |            |
| 0.09060294   | 0          | 0.7189511   | 0.5410921  | 0.05646777 | 0.3150087  | 0.05560094 |            |
| 0.1144821    | 0.01952885 | 0.05227327  | 0.07321708 | 0.08891694 | 0.09589961 |            |            |
| 0.3921696    | 0.3997257  | 0.3617083   | 0.9496216  | 0.1387461  | 1.248812   |            |            |
| 0.04316104   | 0.1159079  | 0.2971030   | 0.02100831 | 0.07743378 | 0.0291905  |            |            |
| 3.5312540    | 0.4246420  | 0.03196654  | 0.09838038 | 0.1776813  | 0.1683854  | 0.2438375  |            |
| 0.8985994    | 0.2121495  | 0.07257833  | 0.08023427 | 0.07047261 | 0          | 0.02386926 |            |
| 0.07571596   | 0.2183541  | 0.005738432 | 0          | 0.5682576  | 0.02855184 | 0.04530147 |            |
| 0.08873911   | 0.1238681  | 0.04424845  | 0.2604866  | 0.3894913  | 0.627871   |            |            |
| 0.01354382   | 0.1359432  | 0.9758115   | 0          | 0.4713637  | 0.8641379  | 0.6716094  |            |
| 13.100780    | 0.06411785 | 0.4866177   | 0.0987453  | 0.1036672  | 1.1159730  | 0.02973831 |            |
| 0.2975825    | 0          | 0.03268877  |            |            |            |            |            |
| TCGA-FD-A5C1 | 1792       | 0           | 0          | 0.09749228 | 0          | 0.08432796 | 0.1165898  |
| 55.425430    | 0.09939116 | 0.3327536   | 0          | 0.06005796 | 0.6115288  | 0.08145858 |            |
| 0.6196176    | 0.0821105  | 0.2020171   | 0          | 0          | 0.06619292 | 0.02715856 |            |
| 0.07481179   | 0          | 1.79576943  | 2.99270    | 0.06995388 | 0.1796844  | 0          | 0          |
| 0.9014057    | 0.7551096  | 0           | 0.03264514 | 0.1610299  | 0.03035474 | 0.03239969 |            |
| 0.04388145   | 0.06945278 | 0.1289832   | 0.9751786  | 0.05331415 | 0          | 0.1177366  |            |
| 0.1054443    | 0.08731832 | 0           | 0.08583982 | 0.08490024 | 0.06120964 | 0.1188187  |            |
| 4.1235970    | 0.1212709  | 0.5074191   | 0.5775992  | 0.5669946  | 0.4509847  | 0          |            |
| 0.03520997   | 1.2967380  | 0.05386449  | 0          | 0.2714431  | 0.03264514 | 0.02630476 |            |
| 0.0607837    | 0          | 0.5642107   | 0.1963170  | 0.07410999 | 0.05699946 | 0.08048485 |            |
| 0.2224656    | 0.03946116 | 0.6529029   | 0.02872773 | 0.0709132  | 0.02537038 |            |            |
| 0.05183431   | 0          | 0.03436331  | 0.1801111  | 0          | 0.1372344  | 0          | 0.05894882 |
| 0.1374364    | 0.4830896  | 0           | 0          | 0          | 0.09129574 | 0.05287312 | 0.07126503 |
| 0.0155028    | 0.2200193  | 0.1566967   | 0          | 0.1766853  | 0.9084173  | 0.1678522  |            |
| 0            | 0          | 0           | 2.7183950  | 0.3810349  | 0          | 0.08705371 | 0.1259988  |
| 0            | 0          | 0           | 2.8662340  | 0.2540778  | 0.0215189  | 0          | 0.2682049  |
| 1.1760360    | 0.06281573 | 0.2486053   | 0          | 0.02737215 | 0.8819916  | 0          | 1.587752   |
| 0.04896771   | 2.2428620  | 0.09618658  | 0.03833771 | 0.07486956 | 0.05984943 |            |            |
| 0.8072254    | 0          | 0.0603862   | 0.03989962 | 0.1128052  | 0.05229562 | 0.03975239 |            |
| 0.7092715    | 0          | 0.03319845  | 0.1509338  | 0          | 0.09187972 | 0.7084691  | 0          |
| 0.06872662   | 0.1691110  | 0.0559631   | 0.1657369  | 0.05413516 | 0.1168850  |            |            |
| 0.5788422    | 0.1885021  | 0.05567389  | 0          | 0.2678873  | 0.2098616  | 0.09325261 |            |
| 0.2436848    | 0.08161286 | 0.4850836   | 0          | 0.01241117 | 0.1586193  | 0.6039904  |            |
| 0.2224492    | 0          | 0.2600486   | 0.01403635 | 0.3871661  | 0          | 0.04383681 |            |

|              |            |             |            |            |            |            |            |            |   |
|--------------|------------|-------------|------------|------------|------------|------------|------------|------------|---|
| 0.4777338    | 0.3370121  | 0.1101148   | 0.1173092  | 0.06248554 | 0.3212969  |            |            |            |   |
| 1.8941360    | 0.03868186 | 0.06578869  | 0.7328501  | 0          | 0.05229562 | 0.621207   |            |            |   |
| 0.02015509   | 0.1954845  | 0.07806447  | 0.4362856  | 0.03771143 | 0.1578446  |            |            |            |   |
| 1.9587090    | 0.0328442  | 0.006855168 | 0.03965831 | 0          | 0.1302163  | 0          | 0.3452201  |            |   |
| 0            | 0.2158897  | 0           | 0.3243453  | 0.2717488  | 0.1873547  | 0.4709463  |            |            |   |
| 0.1985788    | 1.0896130  | 0.03592962  | 0.2476528  | 0.05073329 | 0.1224193  | 0          | 0          |            |   |
| 0.1428977    | 0.07889605 | 0           | 0.04777338 | 0.04930388 | 0          | 0.1463943  |            |            |   |
| 0.4058605    | 0.1177366  | 0.07048788  | 0          | 0          | 0          | 0.03974017 | 0          | 0.08482596 |   |
| 0.03343889   | 0          | 0.2207561   | 0.02772947 | 0.01257048 | 0.9192872  | 0.06015018 |            |            |   |
| 0.04071219   | 0.03865032 | 0.03152274  | 0.4065244  | 0          | 0.1292186  | 0.270773   |            |            |   |
| 0.03113554   | 1.1214430  | 0.09155437  | 0.2524898  | 1.7965520  | 0.04483518 | 0.5574278  |            |            |   |
| 0            | 0          | 0.1868673   | 0.05776352 | 0.4624181  | 0          | 0.2751428  |            |            |   |
| TCGA-XF-AAN7 | 565        | 1           | 0.2405973  | 0.0321613  | 0          | 0.1669115  | 0.04615355 |            |   |
| 20.876140    | 0.06557542 | 0.1097706   | 0          | 0.02971838 | 2.1931140  | 0.2418481  |            |            |   |
| 0.5574625    | 0.2112791  | 0.04798261  | 0.07119513 | 0.2962499  | 0.7205909  |            |            |            |   |
| 0.05375531   | 0.1974346  | 0.1236112   | 1.59030157 | 3.27060    | 0.4153819  | 0          |            |            |   |
| 0.5538426    | 0          | 0           | 0.7832917  | 3.8859560  | 0.2256396  | 0.06461497 | 0.7012028  |            |   |
| 1.6702670    | 0.09619371 | 0.1737103   | 0.07637156 | 0.7658943  | 0.05594737 |            |            |            |   |
| 0.09190922   | 0          | 0           | 1.4609520  | 0.09540465 | 0.1132693  | 0.05601473 |            |            |   |
| 0.2423061    | 0.07839316 | 3.6983570   | 0.8498273  | 0.1329360  | 0.357056   |            |            |            |   |
| 1.3109950    | 0.12062    | 1.1846080   | 0.1066147  | 0          | 0.4029532  | 0.4523048  | 0.03904903 |            |   |
| 0.04812399   | 0.1803208  | 0.8375623   | 0.3885729  | 0.04000552 | 0.03223423 |            |            |            |   |
| 0.04779142   | 0.3082304  | 0.9372721   | 0          | 0          | 0          | 0.06276991 | 0          | 0          | 0 |
| 0.3119343    | 0          | 0.4889337   | 0          | 0.1750173  | 0.1360148  | 0          | 0          | 0          | 0 |
| 0.01744208   | 0.3291303  | 0.09205471  | 0.4142439  | 0          | 0          | 1.2563860  | 0.9220731  |            |   |
| 0.04948138   | 0          | 0           | 0.2179517  | 0.4981995  | 0.27425    | 0          | 0.2830751  |            |   |
| 0.3879417    | 0          | 0.4603047   | 0          | 0          | 0          | 3.3650770  | 0.4023196  | 0.0532408  |   |
| 0.1012966    | 0.2654308  | 0.1612321   | 0.1425149  | 0.4973280  | 0.1640226  | 0          |            |            |   |
| 0.08513697   | 1.4215290  | 1.8855950   | 0.6611764  | 0          | 0.4552941  | 0.08232795 |            |            |   |
| 0            | 0.9868468  | 0.2330376   | 0.1274914  | 0.07897385 | 0.2232769  | 0.1035094  |            |            |   |
| 0.3934122    | 1.3244060  | 0.06571014  | 0.2240589  | 0.2751347  | 0.1818588  | 0          |            |            |   |
| 0            | 0          | 0.6171467   | 0.8861482  | 0          | 0.1071505  | 0.3084693  | 0          | 1.14571    |   |
| 0.5447330    | 0.06812441 | 0.6817281   | 1.2461460  | 0.1142614  | 0.3483484  |            |            |            |   |
| 0.08076871   | 1.2001650  | 0.1965248   | 0.3662836  | 0.6389668  | 0.2515981  |            |            |            |   |
| 0.07656352   | 0.3936077  | 0.1944763   | 0.3831615  | 0.0913188  | 0.0433834  |            |            |            |   |
| 0.4727925    | 0.6367319  | 0.2179517   | 0          | 0.1082187  | 1.6335120  | 0.468636   |            |            |   |
| 0.07656352   | 0          | 0.4351620   | 0.1517647  | 1.0350940  | 0.2311999  | 0          | 0.2803805  |            |   |
| 0.2987272    | 0.0664266  | 0.1244046   | 0.07810601 | 0.2871776  | 0.06500896 |            |            |            |   |
| 0.04070558   | 0.2691299  | 0.1068819   | 0.1229216  | 0          | 0.2009702  | 0.2814910  |            |            |   |
| 0            | 1.2509461  | 0.0757520   | 0.3708337  | 1.3982260  | 0.2245998  | 0.8729440  | 0.07111598 | 0          |   |
| 0.2133863    | 0.1615374  | 0.07442562  | 0          | 0.2325568  | 0.31232    | 0          | 0          |            |   |
| 0.09758783   | 0.08092197 | 0.1534024   | 2.1452960  | 0.1395176  | 0          | 0.1083758  |            |            |   |
| 0            | 0.09176796 | 0.1940654   | 0          | 0          | 0.2623209  | 0.3495564  | 0.0548853  |            |   |
| 0.04976182   | 0.1137223  | 0.07143363  | 0.0358143  | 0.2016847  | 0.3431636  |            |            |            |   |

|              |            |            |             |            |            |            |           |
|--------------|------------|------------|-------------|------------|------------|------------|-----------|
| 0.1072852    | 0          | 0.1890430  | 0.3062541   | 0          | 0.4825408  | 0.3624296  | 0.7496346 |
| 14.426960    | 0.08874287 | 0          | 0           | 0          | 2.6075750  | 0.2002154  | 0         |
| TCGA-2F-A9KO | 734        | 1          | 0.2222748   | 0.6338577  | 0.2015254  | 0.4112012  |           |
| 0.2558326    | 121.8891   | 0.06453434 | 0.0942380   | 0.0338037  | 0.2550046  | 0.07321388 |           |
| 1.5721640    | 0.6951166  | 1.5450280  | 0.2102039   | 0.0689555  | 0.08769776 | 0.1303282  |           |
| 0.6051953    | 0.06621549 | 0.06079972 | 0           | 3.084886   | 108.49790  | 0.2558326  |           |
| 0.2986976    | 0.5116652  | 0.06649488 | 1.2898230   | 0.7236407  | 0.06136794 |            |           |
| 0.3242652    | 0.07959236 | 1.6489540  | 0.3700405   | 0.07899392 | 0.5884323  |            |           |
| 0.4045185    | 0.2734563  | 0.09475902 | 0.1027306   | 0.3887982  | 0.2870544  |            |           |
| 0.1713897    | 3.4860970  | 0.2350378  | 0.1046433   | 0.05749886 | 0.8954141  | 0.834721   |           |
| 6.8962590    | 0.2463929  | 1.3798890  | 0.2128748   | 0.0987424  | 0.7696843  | 0.7124452  |           |
| 0.1700405    | 1.7631920  | 0.06566369 | 0.2495532   | 0.08272591 | 0.07959236 |            |           |
| 0.3821308    | 0.2420554  | 0.3331773  | 0.2149384   | 0.2393210  | 0.09855714 |            |           |
| 0.4169123    | 0.1569846  | 0.5152753  | 0.8658949   | 2.1035120  | 0.7354334  |            |           |
| 0.2881566    | 0.1701032  | 0.1895664  | 0.2237957   | 0.1256721  | 0.4391302  |            |           |
| 0.9858356    | 0.5688065  | 1.3316910  | 0.1796544   | 0.08377115 | 0.3533472  | 0          |           |
| 0.4040843    | 0.09183734 | 0.1112944  | 0.1181678   | 0.08687589 | 0.1474102  |            |           |
| 0.3663429    | 0.2865325  | 0          | 0.8376234   | 3.4642040  | 0.06965815 | 0          | 0         |
| 1.0291412    | 1.1478780  | 0.8867766  | 0.1924211   | 0.1212836  | 0.2730654  | 0.293235   |           |
| 1.4508550    | 0.6950475  | 0          | 0.1402072   | 2.3116810  | 0.06136794 | 0.4955751  |           |
| 0.01311634   | 0.3119415  | 0.3814488  | 0.09930237  | 0.6854771  | 1.07206    | 0          |           |
| 0.2192444    | 0.2240431  | 2.07359    | 0.1943376   | 0.4258220  | 2.0419010  | 0.586283   |           |
| 2.1965790    | 0.09127    | 0.1459193  | 1.1721780   | 0.2152908  | 0.3827928  | 0.04863977 |           |
| 0.2291927    | 0.1912535  | 0.9692058  | 0.8972679   | 0.05201085 | 0.1618828  |            |           |
| 0.1379973    | 0.3953943  | 0.3920221  | 1.3208940   | 0.1056961  | 0.08378143 |            |           |
| 0.3350024    | 0.1364440  | 0.5556159  | 0.1319873   | 0.4749634  | 0.09782301 |            |           |
| 1.8817061    | 0.7096690  | 0.2517458  | 0.6997907   | 2.1319380  | 0.3735198  | 0.618885   |           |
| 0.8456688    | 0.8377357  | 0.1960110  | 0.2118184   | 0.03222758 | 0.3554535  |            |           |
| 0.07747929   | 0.2829315  | 0.05594351 | 0.1197774   | 0.3775810  | 0.1687290  | 0.1469584  |           |
| 0.6406214    | 0.1680692  | 0.2237264  | 0.6196937   | 0.1380640  | 0.6911968  |            |           |
| 0.5772633    | 0.4715526  | 0.2004998  | 0.3573534   | 0.9814502  | 0.2550046  |            |           |
| 0.7896472    | 0.02457014 | 0.3626397  | 0.4123807   | 0.2863837  | 0.1532408  |            |           |
| 0.1443158    | 0.3758528  | 0.6806603  | 0.1587795   | 0.4765496  | 0.3949696  |            |           |
| 0.04395896   | 0          | 0.1980432  | 0           | 0.05263623 | 0.3784651  | 0.4744732  |           |
| 0.3312763    | 0.6280875  | 0.7176360  | 0.1210391   | 2.1031360  | 0.1022003  | 0.02744564 |           |
| 1.9327060    | 0.2487261  | 0.04583853 | 0           | 0.1277466  | 0.6907366  | 0.03784651 | 0         |
| 0.06010407   | 0.2491981  | 3.2018271  | 0.3584610   | 0.4582853  | 0.09499269 |            |           |
| 0.4672385    | 0.2036084  | 0.3956374  | 0           | 0          | 0          | 0.7847331  | 2.744958  |
| 0.4056444    | 0.0919445  | 0.4202476  | 0.3373009   | 0.04963034 | 0.3598011  |            |           |
| 0.9222699    | 0.06607667 | 0.03207018 | 1.0136350   | 0.4243973  | 0.1518236  |            |           |
| 0.6472258    | 0.1116097  | 2.3084895  | 0.7411740   | 0.2672095  | 0.2363598  | 0          | 0         |
| 0.1366807    | 0          | 0.5989445  | 0.006480503 | 0.1161048  |            |            |           |
| TCGA-DK-A3IM | 248        | 1          | 0.08428698  | 0.05633434 | 0.03820938 | 0.3703294  |           |
| 0.04850606   | 32.3575    | 0.03670729 | 0.3369319   | 0.6729670  | 0.07252362 | 0.0728774  |           |

|                    |                    |                    |                    |                    |                              |
|--------------------|--------------------|--------------------|--------------------|--------------------|------------------------------|
| 0.0965623          | 0.3106589          | 0.6835233          | 0.1537258          | 0.02614804         | 0.09976539                   |
| 0.4299598          | 0.04589821         | 0.1757631          | 0.08645756         | 0.1299119          | 2.17610245.5273              |
| 0.2764845          | 0.4077598          | 0.6790848          | 0.03782245         | 0.06669583         | 0.2286714                    |
| 0.1745312          | 0.1580938          | 0.02263616         | 0.4019695          | 0.1220784          | 0.1460288                    |
| 0.2434194          | 0.1337739          | 0.01166569         | 0.3429946          | 0.1001715          | 0.04095358 0                 |
| 0.02437172         | 0.7114222          | 0.1671126          | 0.03968092         | 0.02616439         | 0.5093136                    |
| 0.7415007          | 4.5927580.1401488  | 0.7036894          | 0.1490261          | 0.3369895          |                              |
| 0.3283487          | 0.6213688          | 0.007512189        | 0.4495793          | 0                  | 0.03548662 0.2823282         |
| 0                  | 0.001519978        | 0.1292522          | 0.09475602         | 0.1467090.03403159 | 0.01868651                   |
| 0.1806787          | 0.04464659         | 0.2468125          | 0.8755966          | 0.09701212         | 0.09959911                   |
| 0.0901473          | 0                  | 0.1557484          | 0.1157232          | 0.07148262         | 0.2185560.2002663            |
| 0.1332217          | 0                  | 0.1635006          | 0.0146613          | 0.06699492         | 0.08163862 0.5363029         |
| 0.0522373          | 0                  | 0.0244415          | 0.1811891          | 0                  | 0.2753550.02716339 0         |
| 0.1361263          | 0.8560140.03466901 | 0                  | 0.09743391         | 0.02545122         | 0.9773744                    |
| 0.3602862          | 0.1094496          | 0.2414524          | 0.3591781          | 0.09531015         | 0.9959911                    |
| 0.2704990          | 0.02658339         | 1.4509130.06981246 | 0.4228264          | 0.01492122         |                              |
| 0.1064599          | 0.2789602          | 0.1412086          | 0.02852934         | 0.3484517          | 0.05746103                   |
| 0.02494135         | 0.1301477          | 1.4240930.05952138 | 1.0348910          | 0.5757557          |                              |
| 0.02223194         | 0.1595004          | 0.2884144          | 0                  | 0.6996632          | 0.04081931 0.1200326         |
| 0.08299926         | 0.1303653          | 0.1813091          | 0.5237223          | 1.0485740          | 0 0 0                        |
| 0.2229831          | 0.2311778          | 0.06012019         | 0.1667928          | 0.4214090.03880485 |                              |
| 0.7757238          | 0                  | 0.1620962          | 0                  | 0.3121763          | 1.50575 0 0.2147904          |
| 0.3184341          | 1.0671330.1447184  | 0.01877457         | 0.6507896          | 0.4484763          |                              |
| 0.03716385         | 0.1032710          | 0.3610408          | 0.0661056          | 0.08046607         | 0.1060693                    |
| 0.02919844         | 0.08053836         | 0                  | 0.09118942         | 0.2318826          | 0.2655504 0.07635366         |
| 0.3524832          | 0.1462303          | 0.4193647          | 0.3283487          | 0                  | 0.3421343 0.05081587         |
| 0.3455841          | 0.2175709          | 0.8504458          | 0                  | 0.4282565          | 0.3356057 0                  |
| 0.1307456          | 0.02736239         | 0.5533284          | 0.1138709          | 0.1045743          | 0.2671341                    |
| 0.1123298          | 0.1611366          | 0.02630258         | 0.1971330.09861298 | 0.1796377          |                              |
| 0.04305437         | 0.06040204         | 0.5114549          | 0.1623899          | 0.8708119          | 0.1967066                    |
| 0.8274941          | 0.03321816         | 0.01561115         | 0.008794623        | 0.1697712          | 0.0782192 0                  |
| 0.2356029          | 0.3282394          | 0.06458156         | 0.03312609         | 0.1367494          | 0.2267911                    |
| 0.2806450.8784329  | 0                  | 0.08146056         | 0.02701603         | 0.07593325         | 0.05790646                   |
| 0.08726021         | 0.08498218         | 0.2352735          | 0.0154577          | 0                  | 1.6837960.1345934            |
| 0.06101462         | 0.4780757          | 0.1418078          | 0.07841626         | 0.3021108          | 0.2404368                    |
| 0.1691306          | 0                  | 0.3622966          | 0.1072881          | 0                  | 1.1006740.04232257 0.5544091 |
| 2.0109650.05181457 | 0.0336105          | 0                  | 0.1396249          | 0                  | 0.02002663 0.3507011         |
| 0.003686125        | 0.1834463          |                    |                    |                    |                              |
| TCGA-FD-A3SS       | 391 1              | 0.1512934          | 0.1040081          | 0.1567659          | 0.2299079                    |
| 0.09950561         | 36.885220.03765077 | 0.2356309          | 0.2761057          | 0.1487754          |                              |
| 0.0427146          | 0.9344607          | 0.3765789          | 1.1417780.1985562  | 0.1226062          |                              |
| 0.05116482         | 0.005069092        | 0.07061689         | 0.03863159         | 0.4433989          | 0 3.011048                   |
| 43.287490.2537393  | 0.08132453         | 0.5970337          | 0                  | 0.4104607          | 1.110198                     |
| 0.1074103          | 0.2702622          | 0.0928719          | 1.1910930.3108814  | 0.2534775          |                              |

|                                   |                           |                           |                    |                           |                           |            |
|-----------------------------------|---------------------------|---------------------------|--------------------|---------------------------|---------------------------|------------|
| 1.0611230.2414936                 | 0.08774727                | 0.1809312                 | 0.07828283         | 0.1008149                 |                           |            |
| 0.1674739                         | 0.02499815                | 2.7480490.1028447         | 0.1221025          | 0                         | 0.2176685                 |            |
| 0.8450661.3701660.08625064        | 0.6940156                 | 0.3057130.2304340.4650885 |                    |                           |                           |            |
| 0.02771042                        | 0.06067904                | 0.3547191                 | 0.03830966         | 0.1455949                 | 0.1447924                 |            |
| 0.04643595                        | 0.07639326                | 0.1325743                 | 0.1619859          | 0.9530390.3839693         |                           |            |
| 0.02875021                        | 0.1853226                 | 0.2003494                 | 0.1977783          | 0.3648539                 | 0.6302022                 |            |
| 0.2451818                         | 0.1681170.08570898        | 0.2580603                 | 0.1068279          | 0                         | 0.3682851                 |            |
| 0.5751584                         | 0.1952085                 | 0                         | 0.2305917          | 0.04887395                | 0.5497350.08373696        |            |
| 0.4715035                         | 0                         | 0                         | 0.1002789          | 0.1520560.04851418        | 0.3320489                 | 0.02786157 |
| 0.1731510.3979318                 | 0.8448833                 | 0.03048009                | 0.04435272         | 0.1665637                 |                           |            |
| 0.3132647                         | 1.1099060.5912745         | 0.1122627                 | 0.08402696         | 0.1493554                 |                           |            |
| 0.2443997                         | 1.3037450.1280546         | 0.1271690.1090666         | 3.3252090          | 0.07228238                |                           |            |
| 0.01530473                        | 0.03639873                | 0.09537675                | 0.7531578          | 0.3487131.2062520         |                           |            |
| 0.07674723                        | 0.3337321                 | 1.2456240.08721607        | 0.7227173          | 0.1393079                 |                           |            |
| 0.3088531                         | 0                         | 0.6271332                 | 0.7514018          | 0                         | 1.4015212.8470570.1517498 |            |
| 0.1986427                         | 0.4011483                 | 0.2603569                 | 0.6220019          | 0.7328805                 | 0                         | 0.0236115  |
| 0                                 | 0                         | 0.4247553                 | 0.8891991          | 0.3083272                 | 0.1221999                 | 0.4510335  |
| 0.1990112                         | 0.4125656                 | 0.03850217                | 0.2216834          | 0                         | 0.3202001                 | 1.276318   |
| 0.2771758                         | 0.1468741                 | 1.1431661.24382           | 0.1926537          | 0.4092141                 | 0.8416516                 |            |
| 0.5175039                         | 0.1524763                 | 0.1677151                 | 0.07520915         | 0.2962564                 | 0.2712188                 |            |
| 0.02751143                        | 0.06527738                | 0.07986379                | 0.1101446          | 0.06562683                | 0.2805998                 |            |
| 0.3397753                         | 0.4031162                 | 0.2610539                 | 0.4171651          | 0.3333086                 | 0.7527512                 |            |
| 0.1683941                         | 0                         | 0.2573473                 | 0.05212199         | 0.1363333                 | 0.07438769                | 0.679718   |
| 0.01433477                        | 0.5138179                 | 0.6440465                 | 0.3938376          | 0.1698678                 | 0.1122627                 |            |
| 0.7868314                         | 0.2102359                 | 0.07800885                | 0.2578825          | 0                         | 0.1781016                 | 0.02697863 |
| 1.6753710.05057381                | 0.03070915                | 0                         | 0.3045             | 0.02761057                | 0.2331892                 |            |
| 1.1164930.2219388                 | 0.7934090.09369789        | 0.06404959                | 0.3495510.02902247 |                           |                           |            |
| 0.2406890                         | 0.2303661                 | 0.2142484                 | 0.2208050.03397753 | 0                         | 0.2326203                 |            |
| 0.9615694                         | 2.0089210.04186848        | 0.3175065                 | 0.02771042         | 0.1752411                 | 0                         |            |
| 0.09892442                        | 0.3660991                 | 0                         | 0.03963752         | 0                         | 2.9831290.0591655         | 0.08940411 |
| 0.9807273                         | 0.1026725                 | 0.1029527                 | 0.1399440.4259743  | 0.0192753                 |                           |            |
| 0.01871046                        | 0.3316508                 | 0.05502285                | 0.1992988          | 1.4179490                 | 2.06513                   |            |
| 2.6467660.08857725                | 0.06894877                | 0                         | 0                  | 0.03322607                | 0.02054137                | 0.33916    |
| 0.007561739                       | 0.08279102                |                           |                    |                           |                           |            |
| TCGA-4Z-AA7N                      | 1367                      | 1                         | 0.2617005          | 0.2176671                 | 0                         | 0.9951715  |
| 103.035                           | 0.3039241                 | 0.3381435                 | 0.2122645          | 0.8006286                 | 0.5746672                 |            |
| 3.6672891.3250481.0779710.2985576 | 0.1134032                 | 0.4130121                 | 0                  | 1.5834250                 |                           |            |
| 0                                 | 0.2390283                 | 4.04110171.8245           | 0.08032281         | 0.1563016                 | 0.2677427                 |            |
| 0.2087715                         | 4.9699741.3884370.1926746 | 0.07272024                | 0.3123665          | 1.355923                  |                           |            |
| 0.4182489                         | 0.2170125                 | 0.2519290.2953608         | 0.2468362          | 0.05409298                |                           |            |
| 0.1250663                         | 0.3164766                 | 0.07510451                | 0.1345265          | 6.5169710                 | 0.1095149                 |            |
| 0.03610541                        | 0.7028246                 | 0.9095377                 | 4.7224880.3867953  | 3.8095130.5655313         |                           |            |
| 0.1550089                         | 0.7551717                 | 0                         | 0.6349423          | 1.0498980                 | 0.1958783                 | 0.1298657  |
| 0.7496795                         | 0.3230128                 | 0.2791735                 | 0.1743441          | 0.9447681.2210040.0515727 |                           |            |

|              |            |            |             |             |            |             |
|--------------|------------|------------|-------------|-------------|------------|-------------|
| 0.2025778    | 0.6931105  | 0.7876086  | 3.1717216   | 8.720620    | 3.848355   | 0.09047147  |
| 0.5462046    | 0.2645221  | 0.7345814  | 0           | 0.2585102   | 0.4421702  | 0.5252532   |
| 0            | 0.2820272  | 0.6878806  | 0           | 0           | 0.3171721  | 0.1441691   |
| 0.2023675    | 0.09092034 | 0.9256368  | 0.9037233   | 0.8246475   | 0.3494269  |             |
| 1.1082963    | 0.757120   | 0.5467578  | 0.05967059  | 0.2689068   | 3.0204291  | 1.1560480   |
| 0.4531030    | 0.1308964  | 0.3482917  | 0.06576136  | 0.8377371   | 0.2871335  |             |
| 0.08554435   | 0.2934689  | 1.8144750  | 0.4862308   | 0.0411809   | 0.1958783  |             |
| 0.08554435   | 0.4676640  | 0.9973458  | 1.5627430   | 0           | 0.4340251  | 3.744120    |
| 0.9115484    | 0.1874199  | 1.9543140  | 0.1840731   | 3.7417280   | 0.1591984  | 0           |
| 0.5225039    | 0.1126568  | 0.2542355  | 0.1527125   | 0.3597938   | 0.2001572  |             |
| 0.5325214    | 0.6402543  | 0          | 0.06353216  | 0.07221081  | 0.3546871  | 0.351662    |
| 0.8772846    | 0          | 0.1315227  | 0.4045364   | 0           | 0.7136373  | 0.3107968   |
| 0.2982450    | 0.07678282 | 7.6310661  | 0.9479860   | 0.2663590   | 0.1975992  | 0.1464738   |
| 0.9370994    | 0.7053353  | 0.6995125  | 1.2494662   | 2.2434130   | 0.7837951  |             |
| 0.5059187    | 0.5380735  | 0.1216294  | 0.1480516   | 0.2634657   | 0.02686148 |             |
| 0.8520617    | 0          | 0.2307     | 0.3656973   | 0.1905513   | 0.4916978  | 0.5986552   |
| 0.2092635    | 0.5425312  | 0.5437236  | 0.2220774   | 0.5665517   | 0.5609847  |             |
| 0.6603049    | 0.3002357  | 1.3920240  | 0.07714195  | 0.5313311   | 0.6573277  | 1.57351     |
| 0.5051808    | 0.07551717 | 0.3470739  | 1.0056680   | 0.1705443   | 0.3794723  |             |
| 0.1033393    | 0.0575068  | 0          | 0.2720326   | 0.1360804   | 0.08263001 | 0.3564759   |
| 1.2307640    | 0.6686331  | 0.7170848  | 3.0792850   | 0.08143326  | 0.8440101  | 0.04583922  |
| 0.2585102    | 6.1651350  | 0.2342749  | 0.1439175   | 1.7361      | 0.1215398  | 0.5353071   |
| 0.4158885    | 0.09142433 | 0.5661196  | 0.1564796   | 0.9228669   | 0.3950837  |             |
| 0.3379703    | 0.6295019  | 0.2982450  | 0.1571755   | 0.1598154   | 0.1394270  | 0.1407248   |
| 0            | 0          | 0.2898585  | 3.1262250   | 0.2653306   | 0.09622491 | 0           |
| 0.1731362    | 0.2286205  | 0.8445549  | 0.05186462  | 0.1006896   | 0.5375799  |             |
| 0.1480516    | 0.05958436 | 0.5391208  | 0.2336112   | 0.8053198   | 9.823079   |             |
| 0.1620694    | 0.4174256  | 0.1223513  | 0.5137991   | 0.3397290   | 0.1658138  |             |
| 0.7466627    | 0.02034659 | 0.3037749  |             |             |            |             |
| TCGA-HQ-A2OE | 1174       | 0          | 0.1592084   | 0.4086108   | 0.3175617  | 0.3387098   |
| 0.1465958    | 48.704430  | 0.08099961 | 0.2760227   | 0.3835685   | 0.01573223 |             |
| 0.09357658   | 1.0242310  | 0.5902156  | 0.1591659   | 0.1397049   | 0.05653359 |             |
| 0.01120199   | 0.1213750  | 0.04742804 | 1.0321090   | 0.09815542  | 2.8368093  | 8.63555     |
| 0.3958086    | 0          | 0          | 0.1714614   | 0           | 0.4952843  | 0           |
| 0.7086557    | 0.1971959  | 0.1442811  | 0.5287599   | 0.3881217   | 0.06463644 |             |
| 0.1036604    | 0.2883237  | 0.1423361  | 0.08224316  | 0           | 1.5210610  | 2.777777    |
| 0.04497161   | 0.1828596  | 0.3527461  | 0.89224     | 3.4937050   | 0.5082725  | 3.16752     |
| 0.04222397   | 5.0074030  | 0.4548227  | 0.5103017   | 0.005675864 | 1.56776    | 0.02821968  |
| 0.2144964    | 0.4799568  | 0.05130852 | 0.006890553 | 0.08916507  | 0.2386443  |             |
| 0.4249118    | 0.3599777  | 0.01411867 | 0.3327491   | 0.04216613  | 0.7983679  |             |
| 3.1217382    | 7.120220   | 0.1053535  | 0.006191922 | 0.003322895 | 0.1086243  | 0.008743512 |
| 0.1800299    | 0.7666790  | 0.1210496  | 0.8340085   | 0.06088389  | 0.3088338  |             |
| 0.04984831   | 0.1518548  | 0.02056079 | 0.6367518   | 0.03946809  | 0.02391499 |             |
| 0.1662018    | 0.01244529 | 0.06010236 | 0.7534621   | 0.02052341  | 0          | 0.7970936   |



|              |             |            |            |             |            |            |           |
|--------------|-------------|------------|------------|-------------|------------|------------|-----------|
| 2.1965590    | 0.01309715  | 0          | 0.04907771 | 0           | 1.3977970  | 0.1451817  | 0.2067376 |
| 0.4560757    | 0.2567093   | 0.09001494 | 0.9245306  | 0.3301467   | 0.07025648 |            |           |
| 0.2008518    | 3.1060210   | 0.1582412  | 0.5324469  | 0           | 0.3753687  | 0.1170941  |           |
| 0.4267627    | 1.0166990   | 0.9543683  | 0.0434149  | 0.07537812  | 0.3216327  | 1.50505    |           |
| 0.2762542    | 1.43074     | 0.1539256  | 1.2525410  | 0.03359486  | 0.08034074 | 0.1002398  |           |
| 0.06271041   | 0.3793721   | 0.5243001  | 0.1349820  | 0.02090347  | 0.3545929  |            |           |
| 0.2465798    | 0.8122271   | 0.2594108  | 0.1117611  | 0           | 0.1581488  | 0.024275   |           |
| 1.5644170    | 0.6550023   | 0.2952563  | 0.1260209  | 0.7170859   | 0.02931915 |            |           |
| 0.4992713    | 0           | 0.7756586  | 0.1261215  | 1.4488910   | 0.5569869  | 0          | 0.1803175 |
| 0.4410892    | 1.7225      | 0.9282485  | 0.0248241  | 0.6841136   | 2.3931140  | 0.08423786 |           |
| 0.4876674    | 0           | 0.2618743  | 0.3829220  | 0.4863716   | 0.09616932 | 0          | 0.1825532 |
| 0.07251311   | 0.2296617   | 0.9761132  | 0.1043316  | 0.4230549   | 1.270142   |            |           |
| 0.2046017    | 0.6271041   | 0.1736596  | 0          | 0.1723339   | 0.03839413 | 0.7431518  |           |
| 0.2465798    | 0.9318476   | 0          | 0.5061361  | 0.2699274   | 0.02637354 | 1.066882   |           |
| 0.2067376    | 0.4655773   | 0.7399064  | 0.2801318  | 0.6915789   | 0.1414521  |            |           |
| 0.07451781   | 0           | 0.1170279  | 0          | 0.2488309   | 0.1951794  | 0.1038971  | 2.20311   |
| 0.1226943    | 1.4186950   | 0.1634847  | 0.9785995  | 0.06901979  | 0.04718025 |            |           |
| 0.2259236    | 0.4275710   | 0.2560949  | 0.02970493 | 0.006654605 | 0.6876434  |            |           |
| 0.1301196    | 0.05005709  | 0          | 0.04283823 | 1.9309391   | 0.0410310  | 0.1600244  |           |
| 0.02041207   | 0.4016016   | 0.1750058  | 0.3747588  | 0.05136689  | 0.1777618  |            |           |
| 0.005839562  | 0.03471666  | 3.5852880  | 0.1452751  | 0.09219967  | 1.9264640  | 0.2268919  |           |
| 0.04502826   | 0.2816446   | 0.7844535  | 0.2981702  | 0.1929551   | 0.6239972  |            |           |
| 0.04053096   | 0.09787174  | 0.4200667  | 0.06395396 | 0.3086528   | 18.51507   |            |           |
| 0.1200560    | 0.05078908  | 0.06699035 | 0.3868119  | 0.03426501  | 0.0302624  |            |           |
| 0.09841875   | 0.7742484   | 0.08316213 |            |             |            |            |           |
| TCGA-UY-A8OC | 0           | 1          | 0.01630993 | 0.01744153  | 0          | 0.09051849 | 0.3003568 |
| 87.880280    | 0.05682426  | 0.2133750  | 0.1785905  | 0           | 0          | 0.9261389  | 0.1748769 |
| 0.6348719    | 0.008813824 | 0.1329996  | 0.03861014 | 0.09180605  | 0.8881519  |            |           |
| 0.02915228   | 0.1873754   | 0          | 1.14623874 | 0.070340    | 0.02252676 | 0.0175341  |           |
| 0.4505352    | 0.1171011   | 0.3097430  | 0.6371855  | 0.9726508   | 0          | 0.1401665  |           |
| 0.4148426    | 0.09123264  | 0.06955632 | 0          | 0.06626784  | 0.1805893  | 0.2199727  |           |
| 0.05722795   | 0.05071815  | 0          | 0.1509134  | 2.1088880   | 0.3685653  | 0.02025173 |           |
| 1.51117      | 0.08502748  | 6.4803960  | 0.04339113 | 0.7960544   | 0.1730235  | 0          |           |
| 0.5688076    | 1.4637640   | 0.2907288  | 1.0707160  | 0.1098692   | 0.2549485  |            |           |
| 0.1401665    | 0.06823652  | 0.1130928  | 0          | 0.1135555   | 0.7375504  | 0.02169557 |           |
| 0.1136270    | 0.01727865  | 0.02387968 | 0.2541481  | 0.5005947   | 0          | 0.2029839  |           |
| 0.05446565   | 0.09273246  | 0.1970583  | 0          | 0.1208332   | 0          | 0.1178470  |           |
| 0.1581907    | 0.09078498  | 0.1037106  | 0.04212655 | 0           | 0.0808653  | 0          |           |
| 0.04729545   | 0.02549887  | 0.0366099  | 0.3801777  | 0           | 0          | 0.2212651  |           |
| 0.9000963    | 0.5865247   | 0.06693915 | 0          | 0.1575978   | 0.2161446  | 0.2974595  |           |
| 0.08471602   | 0.1802141   | 0.1953588  | 0.1106578  | 0.1762093   | 0.1288439  | 0          |           |
| 0            | 1.2283180   | 0.3818215  | 0.0230986  | 0.05493462  | 0.04798231 | 0          |           |
| 1.3838210    | 0.2697082   | 0          | 0          | 0.0461711   | 0.0819870  | 2.0622140  | 0.9630045 |
| 0.2880646    | 0.01785905  | 0          | 0.6243781  | 0.06318982  | 0.08642554 | 0.08565731 |           |

|              |            |            |             |            |             |             |           |            |
|--------------|------------|------------|-------------|------------|-------------|-------------|-----------|------------|
| 0.04036209   | 0          | 0          | 0.4740414   | 0          | 0.2138133   | 0.04050346  | 0         | 0          |
| 0.1342020    | 0.04653415 | 0.07377185 | 0.2893062   | 0.06007136 | 0.08895183  |             |           |            |
| 0.3486554    | 0.08364367 | 0          | 0.4142234   | 0.3156506  | 0           | 0.1477794   |           |            |
| 0.2464740    | 0.3003568  | 0.1048649  | 0.8864442   | 0.08760407 | 0.3905202   |             |           |            |
| 0.1725931    | 0          | 0.1986409  | 0.3018085   | 0.2387792  | 0           | 0.0738897   |           |            |
| 0.04520028   | 0.2493528  | 0          | 0.09410977  | 0.2051217  | 0.4357469   | 0           |           |            |
| 0.04197364   | 0.02096019 | 0.9940757  | 0.5082961   | 0.2491290  | 0.3177821   |             |           |            |
| 0.2359946    | 0.2880646  | 0.6736158  | 0.1709769   | 0          | 0.1490133   | 0.418976    |           |            |
| 0.6124098    | 0.09445293 | 0.04235801 | 0.1168054   | 0.4583189  | 0.07358407  |             |           |            |
| 0.1641972    | 0.1159272  | 0.03225589 | 0           | 0.1961803  | 0.0763283   | 0.04634764  |           |            |
| 0            | 0.6386167  | 0.1666845  | 0.1508314   | 0.9689106  | 0.03045092  | 0.1810097   |           |            |
| 0.05142296   | 0.1208332  | 0.1974089  | 0.08760407  | 0          | 0           | 0.3442704   |           |            |
| 0.2463646    | 0.2332742  | 0.3076826  | 0.05292328  | 0.0877703  | 0.2218463   |             |           |            |
| 0.4986106    | 0.06318982 | 0.0756624  | 0.08364367  | 0.02938688 | 0.1792828   |             |           |            |
| 0.01421917   | 0          | 0          | 0           | 0.4265313  | 0           | 0           | 0.6784059 | 0.06456581 |
| 0.0825461    | 0.1131481  | 0.2537762  | 0           | 0          | 0.1929802   | 0.1245645   |           |            |
| 0.06684241   | 0.2209817  | 0.1965508  | 0.3161959   | 6.873502   | 0.01604218  |             |           |            |
| 0.2341364    | 0.06862752 | 0.07204821 | 0.04011704  | 0          | 0.07755692  | 0.005706261 |           |            |
| 0            |            |            |             |            |             |             |           |            |
| TCGA-GV-A3JV | 434        | 1          | 0.4604933   | 0.1561405  | 0.0814646   | 0.5298388   |           |            |
| 0.03447257   | 35.665610  | 0.08979479 | 0.1639777   | 0.1546246  | 0.01109849  |             |           |            |
| 0.5370689    | 0.3311713  | 0.8952055  | 0.1578066   | 0.04579392 | 0.07976459  |             |           |            |
| 0.01053677   | 0.5382170  | 0.05353388 | 0.0368665   | 0.04616327 | 2.29948349  | 5.5979      |           |            |
| 0.04136709   | 0.0241491  | 0.2585443  | 0.1612793   | 0          | 1.1213440   | 0.0744221   |           |            |
| 0.1404438    | 0.1447848  | 0.6665728  | 0.2243777   | 0.2634430  | 0.3243652   |             |           |            |
| 0.3251435    | 0.2528647  | 0.08357536 | 0.09025937  | 0.3405301  | 0.1160388   |             |           |            |
| 0.02598096   | 8.0035050  | 0.1781469  | 0.08460202  | 0.0278920  | 0.6786788   | 0.5855268   |           |            |
| 4.8293360    | 0.4482082  | 4.8182920  | 0.9730551   | 0.1197468  | 0.5750480   | 0.2015991   |           |            |
| 0.03703798   | 2.2857230  | 0.03981582 | 0.07565952  | 0.5517783  | 0.07239241  |             |           |            |
| 0.03402716   | 0.2186613  | 0.3367089  | 0.7298482   | 0.1451146  | 0.009960181 |             |           |            |
| 0.2166848    | 0.06544252 | 0.6166622  | 2.0418375   | 7.913930   | 0.08494042  | 0.06115431  |           |            |
| 0.02813011   | 0.2043475  | 0.02467286 | 0.1016034   | 0.1664193  | 0.3415835   |             |           |            |
| 0.2231715    | 0          | 0.2396575  | 0.4141783   | 0.2856741  | 0.1740582   | 0.2858572   |           |            |
| 0            | 0          | 0.06513836 | 0.0702374   | 0.05500531 | 0.4482379   | 0.02895696  |           |            |
| 0.04498963   | 0.4788782  | 1.1363650  | 0.007919607 | 0.04609647 | 0.06924491  |             |           |            |
| 0.1085269    | 1.4884420  | 0.7681509  | 0.2041837   | 0.07354149 | 0.1655759   |             |           |            |
| 0.1270042    | 0.5359336  | 0.3549043  | 0.1321687   | 0.2550482  | 8.598110    | 0.03721105  |           |            |
| 0.1878105    | 0.04374273 | 0.1891488  | 0.1652109   | 0.4214908  | 0.3522851   |             |           |            |
| 0.7893516    | 0          | 0.07976459 | 0.1098368   | 1.2759690  | 0.1903545   | 0.6689763   |           |            |
| 0.1085886    | 0.6807933  | 0.1895992  | 0.05667733  | 0.5165296  | 0.1327194   |             |           |            |
| 1.0266560    | 0.3481165  | 0.1755705  | 0.08847961  | 0.3057411  | 0.7344667   |             |           |            |
| 0.3819968    | 0.7122334  | 0          | 0           | 0.0278920  | 0.2740014   | 0.3056225   | 0.8009373 |            |
| 0.06408986   | 0.02540084 | 0.4453278  | 0.1654684   | 0.2143929  | 0.08003181  |             |           |            |
| 0.2879987    | 0.05931594 | 0.3803303  | 1.3794460   | 0.1028833  | 0.02544142  |             |           |            |

|              |            |            |             |            |            |            |
|--------------|------------|------------|-------------|------------|------------|------------|
| 0.5374783    | 1.0341770  | 0.8993846  | 0.2101495   | 1.2970311  | 1.1354610  | 1.1980887  |
| 0.2201797    | 0.1954151  | 0.5696222  | 0.1879213   | 0.2573375  | 0.1074193  |            |
| 0.03112638   | 0.5151373  | 0.03410349 | 0.1701185   | 0.6709540  | 1.1868357  |            |
| 0.3527126    | 0.4335661  | 0.2338287  | 1.3877330   | 1.1400117  | 0.1429653  |            |
| 0.1215750    | 0.4333695  | 1.1335470  | 0.3865614   | 0.7417635  | 0          | 0.2827159  |
| 0.7001430    | 0.1860553  | 0.3902601  | 0.1458455   | 0.13406    | 0          | 0.4155135  |
| 0.2805848    | 0.1995781  | 0.0977348  | 0.02803931  | 0.4503203  | 0.1051243  |            |
| 0.03191649   | 0.1376916  | 1.0288750  | 0.4304413   | 0.5193368  | 0.9863301  |            |
| 0.3250271    | 0.6136575  | 0.07082303 | 0.1331355   | 2.0789780  | 0.09049051 |            |
| 0.1389732    | 0          | 0.04929299 | 0.1802581   | 0.1606402  | 0.03531337 | 0.03644469 |
| 0.09066222   | 1.0121050  | 0.9867249  | 0.04351456  | 0.2084143  | 0.05759975 |            |
| 0.2226044    | 0.3086498  | 0.09302191 | 0.01811869  | 0.5643188  | 0          | 0.04198505 |
| 2.1866070    | 0.3484525  | 0.06504335 | 0.04247021  | 0.29345    | 0.03009384 | 0.2103772  |
| 0.8504916    | 1.2620860  | 0.1166764  | 0.4734294   | 0.1143722  | 0.09205971 |            |
| 0.4445116    | 0.02255854 | 1.4308812  | 0.8077390   | 0.2504024  | 0.1433191  | 0.04725914 |
| 0.2480737    | 0.06215827 | 0          | 0.8438498   | 1.94904    | 0.03128945 |            |
| TCGA-XF-A9T8 | 418        | 1          | 0.05574553  | 0.1043232  | 0          | 0.09023649 |
|              | 63.884420  | 0.04855477 | 0.1519359   | 0.2797680  | 0          | 0.4137287  |
|              | 0.4391509  | 0.1054364  | 0.1432909   | 0          | 0.1045943  | 0.2124924  |
|              | 0.09148977 | 0.1718417  | 1.10225186  | 0.938820   | 1.1283233  | 0.4344897  |
|              | 0.05002985 | 0.4411114  | 0.5041273   | 0.5078965  | 0.1045597  | 0          |
|              | 0.1503433  | 0.04457547 | 0.2817363   | 0.1415601  | 0.07715431 | 0.09722101 |
|              | 0.08044791 | 0.1733490  | 0.07199195  | 0.7092323  | 2.1824070  | 0.08841965 |
|              | 0.02595682 | 0.6736974  | 0.3632682   | 4.2962990  | 0.07415306 | 0.7518073  |
|              | 0.1478438  | 0          | 0.4860305   | 2.6444350  | 0.06334704 | 0.9148977  |
|              | 0.4356930  | 0.02994211 | 0.03417952  | 0.1523855  | 0.04177969 | 0.2910902  |
|              | 1.0353560  | 0.02240566 | 0.1033489   | 0.1938431  | 0.4705188  | 0.5988422  |
|              | 0.1317453  | 0.1951247  | 0.005817425 | 0.0475424  | 0.09184411 | 0.03151801 |
|              | 0.08259892 | 0.3708647  | 0.2265683   | 0.08527202 | 0.1622035  | 0.0824216  |
|              | 0.2658537  | 0          | 0.2026850   | 0.2763887  | 0          | 0.04041266 |
|              | 0.2313335  | 0.07186106 | 0           | 1.2064151  | 1.5168510  | 0.02292931 |
|              | 0.4155517  | 0.09531411 | 0.2171625   | 0.0969554  | 0.2311321  | 0.03151801 |
|              | 0.6022641  | 0.1376169  | 0.04099957  | 0          | 1.9591860  | 0.09234482 |
|              | 0.2459974  | 0.07471377 | 0.3899526   | 0.2880728  | 0.07600689 | 0          |
|              | 1.3983490  | 0.03374239 | 0.7135798   | 0.04491316 | 0.8184839  | 0.2940743  |
|              | 0.5626133  | 0.03052014 | 0           | 0.7294986  | 0.4319517  | 0.0886179  |
|              | 0.2069298  | 0.09593103 | 0.07292174  | 0.7610131  | 0.03913226 | 0          |
|              | 0          | 0          | 0.1146719   | 0          | 0.09455403 | 0.1793442  |
|              | 0.03680036 | 1.2977890  | 0.3907406   | 0.05106406 | 0.1578418  | 0.3510087  |
|              | 0.1283233  | 0.2036458  | 0.1179623   | 0.3368487  | 0.4819949  | 0.1474761  |
|              | 0.07968464 | 0.07274279 | 0.5348769   | 0.08744155 | 0.03547898 | 0.1052279  |
|              | 0.1416154  | 1.0830810  | 0.06031066  | 0          | 0.3372080  | 1.1009972  |
|              | 0.07880359 | 0.3235849  | 0.3040276   | 0.1064369  | 0          | 0.4705188  |
|              | 0.09593103 | 0.3116695  | 0.01848624  | 0.2754438  | 0.2911762  | 0.2154712  |

|              |             |             |             |             |             |             |           |
|--------------|-------------|-------------|-------------|-------------|-------------|-------------|-----------|
| 0.1037667    | 0.03619376  | 0.3992281   | 0.09037405  | 0.06287557  | 0.1662838   |             |           |
| 0.0990566    | 0.09003513  | 0           | 0.03725126  | 0.06522043  | 0           | 0           | 0.3654869 |
| 0.2492478    | 0.3436833   | 0.7199195   | 0.07805843  | 0.5948763   | 0.1318185   |             |           |
| 0.1858476    | 0.2181213   | 0.03742764  | 0.03448829  | 0           | 0.1368908   | 0.2105118   |           |
| 0.1139008    | 0.1314532   | 0.04522149  | 0.1499946   | 0.1895615   | 1.1189170   |             |           |
| 0.08620193   | 0           | 0.07533084  | 0           | 0.06074944  | 0.1573749   | 0           | 0.1215576 |
| 0.6884231    | 0.02543345  | 0.02305927  | 0.4742830   | 0.1875770   | 0.05808631  | 0.1224638   |           |
| 0.4336896    | 0           | 0.02412917  | 0.1700493   | 0.1773949   | 0.08567251  | 1.252193    |           |
| 0.1399560    | 0.3859725   | 1.7654970   | 0.0639688   | 0.2889801   | 0           | 0.1231264   |           |
| 0.05998809   | 0.02649034  | 0.1457946   | 0           | 0.09706184  |             |             |           |
| TCGA-KQ-A41S | 35          | 0           | 0.136303805 | 0.131184703 | 0.247159585 | 0.214333955 | 0         |
| 26.350715869 |             | 0.047488648 | 0.158506444 | 0.223875053 | 0.093824658 | 0.013468906 |           |
| 2.123704063  | 0.365366343 | 0.555834445 | 0.169413578 | 0.096651479 | 0.064533822 |             |           |
| 0.006393609  | 1.068822833 | 0.024362873 | 0.156591617 | 0.056022839 | 2.18997966  |             |           |
| 38.155395396 |             | 0.100404569 | 0.380989286 | 0.125505711 | 0.097862681 | 0.431425883 |           |
| 1.084727934  | 0.451585971 | 0.204527826 | 0.29284666  | 0.46225123  | 0.17427223  |             |           |
| 0.174386883  | 0.511736119 | 0.173064824 | 0.186135227 | 0.158477202 | 0.092566473 |             |           |
| 0.052982126  | 0.176028047 | 0.094589949 | 3.740248223 | 0.432391042 | 0.256678347 |             |           |
| 0.186170469  | 0.384361241 | 1.030346521 | 3.427461896 | 0.290099506 | 2.065842199 |             |           |
| 0.373543807  | 0           | 0.313534415 | 0.034950958 | 0.12634189  | 0.715847391 | 0.193278796 |           |
| 0            | 0.060875211 | 0.29284666  | 0.176977227 | 0.152674618 | 0.040862325 | 0.474497862 |           |
| 1.452892997  | 0.024174959 | 0.175309565 | 0.072199774 | 0.239478115 | 0.707980936 |             |           |
| 2.384608517  | 0.103082024 | 0.180238043 | 0.085345362 | 0.092997015 | 0.089827481 |             |           |
| 0.061651928  | 0.363533785 | 0.310904229 | 0.418565545 | 0           | 0.237962949 | 0.13277248  |           |
| 0            | 0.105616828 | 0.346910659 | 0.540639988 | 0           | 0.102765822 | 0.127858079 |           |
| 0.105692822  | 0.288835062 | 0.070283198 | 0.818977947 | 0.21132989  | 2.173080513 |             |           |
| 0.39085054   | 0.39159235  | 0           | 0.296338869 | 0.903171942 | 0.932212841 | 0.318591421 |           |
| 0.200809138  | 0.276291976 | 0.092477893 | 0.785386852 | 0.080757157 | 0           | 0.103173734 |           |
| 1.417573362  | 0.180634388 | 0.182338486 | 0.077214999 | 0.183637811 | 0.240596011 |             |           |
| 0.146146537  | 0.756629276 | 0.394446522 | 0.817717981 | 0.129067643 | 0.210466928 |             |           |
| 1.254616743  | 0.055002503 | 0.56972379  | 0.395342991 | 1.331333454 | 0.057523451 |             |           |
| 0.240738713  | 0.858187702 | 0.053688554 | 0.692183015 | 2.481995463 | 0.234736953 |             |           |
| 0.107377109  | 0.269848231 | 0.093824658 | 0.071320589 | 0.576234919 | 0           | 0           |           |
| 0.101547528  | 0.374087991 | 0.206054153 | 0.48600084  | 0.194445468 | 0           | 0.265479827 |           |
| 0.200809138  | 0.148675997 | 0           | 0.13980383  | 0.035992327 | 2.538587166 | 0.426126478 |           |
| 2.247427856  | 0.092625621 | 0.343301591 | 0.941292836 | 0.187223895 | 0.255033284 |             |           |
| 0.695510817  | 0.435149258 | 0.096158605 | 0.18927071  | 0.166006328 | 0.336299499 | 0           |           |
| 0.10409989   | 0.096056199 | 0.10073162  | 0.659891665 | 0           | 0.137634951 | 0.428556088 |           |
| 0.309191106  | 0.230485787 | 0.666478606 | 0.108603275 | 0.655565506 | 0.127436569 |             |           |
| 0.10409989   | 0.088524639 | 0.85463413  | 0.06878249  | 0.187649316 | 0.614415097 |             |           |
| 0.018080336  | 0.411718144 | 0.536885543 | 0.722537554 | 0.112764758 | 0.070798094 |             |           |
| 0.178961848  | 0.324095541 | 0.116840506 | 0.193126327 | 0.145322403 | 0.118609024 |             |           |
| 0.034027957  | 1.912749627 | 0.191365144 | 0.116199677 | 0.055699941 | 0.701622811 |             |           |
| 0.278600066  | 0.588239813 | 1.056168282 | 0.050896325 | 0.383997607 | 0.096693116 |             |           |

|                           |                                   |                                   |                           |                    |                  |
|---------------------------|-----------------------------------|-----------------------------------|---------------------------|--------------------|------------------|
| 0.14137425                | 3.012247896                       | 0.256240827                       | 0.202386173               | 0.508628409        | 0.136733709      |
| 0.257361912               | 0.167099823                       | 0.128566826                       | 0                         | 0.073350587        | 1.398219904      |
| 0.158425242               | 0.231850246                       | 0                                 | 0.049117864               | 0.074914262        | 0.065357109      |
| 0                         | 0                                 | 0                                 | 2.297166013               | 0.174125041        | 0.112764758      |
| 0.077100506               | 0.283677293                       | 0.438305974                       | 0.048623596               | 0.117996823        | 0.584624258      |
| 0.069399927               | 0.055860924                       | 0.476271611                       | 0.383272399               | 0.528496707        | 4.696709268      |
| 0.165348334               | 0.086964587                       | 0.114705517                       | 0                         | 0.117341853        | 0                |
| 0.009537567               | 0.047465323                       |                                   |                           | 0.2074085          |                  |
| TCGA-CU-A3YL              | 906                               | 0                                 | 0.3469116                 | 0.3400658          | 0.05242122       |
|                           | 0.02218257                        | 23.503120                         | 0.2941607                 | 0.6067233          | 0                |
|                           | 0.01428341                        | 0.388795                          |                           |                    |                  |
| 1.0848912.4649620.2812047 |                                   | 0.007687222                       | 0.06843638                | 0.1559457          | 0.3463343        |
| 0.1291809                 | 0.1186151                         | 0                                 | 5.14132344.560980.1131311 | 0.06215829         |                  |
| 0.1330954                 | 0.4670133                         | 0.7320248                         | 3.8692740.04788948        | 0.1084481          |                  |
| 0.1242224                 | 1.0110480.2656658                 | 0.1849326                         | 1.6280470.4918620.1813867 |                    |                  |
| 0.03361216                | 0.0670789                         | 0.1348467                         | 1.2693760.0668734         | 18.0047            | 0.6419547        |
| 0.2722005                 | 0.03589614                        | 2.4456281.4317544.5725280.1922767 | 1.188214                  |                    |                  |
| 0.5878105                 | 0.5393867                         | 4.6120250                         | 0.05539647                | 2.1825190          | 0.1460572        |
| 2.42087                   | 0.0310556                         | 0.02293862                        | 0.4163331                 | 0.6066675          | 0.3354615        |
| 0.09337902                | 0.006409223                       | 0.1549259                         | 0.3981428                 | 0.4021035          | 1.764368         |
| 1.2865890.2186314         | 0.1349207                         | 0.0663714                         | 0.3451729                 | 0.06350642         |                  |
| 0.1634505                 | 0.4069354                         | 1.0440680.1827731                 | 0                         | 0.08411777         | 0.1508589        |
| 0.2757403                 | 0.0373346                         | 0.4204450.07166677                | 0                         | 0.1760452          | 0.1129917        |
| 0.04129425                | 0.9444306                         | 0.1118002                         | 0.1158005                 | 0.3268266          | 1.152247         |
| 0.04416659                | 0.02966237                        | 0                                 | 0.1396708                 | 6.8481952.1089850  | 0.06506887       |
| 0.6525913                 | 0.2288307                         | 1.0280880.6565794                 | 0                         | 0.2917679          | 6.500469         |
| 0.1915579                 | 1.9336510.04094221                | 0.4381716                         | 1.1481550.6586840.1239456 |                    |                  |
| 1.1951430                 | 0.1026546                         | 0.5021876                         | 1.4143920.1749860.4380281 | 0.1397502          |                  |
| 1.1984780.09150311        | 0.3647099                         | 0.4036029                         | 0.1138705                 | 1.3212751.008034   |                  |
| 0.3868024                 | 0.07591369                        | 0.8227295                         | 0.4477434                 | 0.5672517          | 2.8771760        |
| 0                         | 0.1322367                         | 0.7866536                         | 2.4580180.08248167        | 0.1307604          | 0.3066712        |
| 0.9050489                 | 0.5124174                         | 0.1029985                         | 0.2223873                 | 0                  | 2.1414462.646817 |
| 0.2648152                 | 0.3601656                         | 1.34703                           | 3.8597670.8068567         | 0.3670473          | 1.281043         |
| 1.9996780                 | 0.3896261                         | 0.1257466                         | 2.9125320.2418489         | 0.03679838         |                  |
| 0.03638036                | 0.4005869                         | 0.2762358                         | 0                         | 0.3231931          | 0.7271555        |
| 0.3142594                 | 0.3347918                         | 0.7170314                         | 1.5762080.1351430         | 0.0938780.06971665 |                  |
| 1.1670720.3482448         | 0.6717744                         | 0.07669484                        | 0.8058530.8168973         | 0.3352263          |                  |
| 0.5381279                 | 0.03753974                        | 0.05175933                        | 0.3436946                 | 0.2086841          | 0.8677276        |
| 0.3595912                 | 0.1867667                         | 0                                 | 0.9465957                 | 0                  | 0                |
| 0.1477239                 | 4.2330130.9333651.0120160.9995378 | 0.4785221                         | 1.070883                  |                    |                  |
| 1.0889340.0388195         | 0.5007919                         | 0                                 | 0.1208353                 | 0.5049119          | 0.2362731        |
| 0.1363417                 | 0.1876128                         | 0.03889316                        | 0.5734487                 | 1.50199            | 0.1120038        |
| 0.08940761                | 0.0741291                         | 0.2604409                         | 0.1588891                 | 0.1764241          | 0.3031366        |
| 0.2420870.01060357        | 0.009005578                       | 12.894440.1318964                 | 0.1435008                 | 0                  |                  |
| 0.1945527                 | 0.07745969                        | 0.7219971                         | 0.9596112                 | 0.2062561          | 0.1751854        |

|              |             |            |            |             |             |            |
|--------------|-------------|------------|------------|-------------|-------------|------------|
| 1.33616      | 0.03679838  | 0.3258145  | 0.7524560  | 0.08709644  | 2.76225     | 8.31343    |
| 0.4123035    | 0.2075031   | 0.1216421  | 0.7662316  | 0.1155495   | 0.05495093  |            |
| 2.8043770    | 0.0151715   | 0.1006714  |            |             |             |            |
| TCGA-E7-A7XN | 428         | 0          | 0.06145375 | 0.2135819   | 0.1671511   | 0.4121170  |
| 45.056740    | 0.2009925   | 0.2803778  | 0.1057541  | 0.01518143  | 0.05815958  |            |
| 0.2059107    | 0.6549845   | 0.1162328  | 0.05991722 | 0           | 0.05765228  | 0.03346445 |
| 0.04576755   | 0.07564359  | 0          | 1.08666430 | 0.59309013  | 0.3468480   | 0.07073167 |
| 0.1103056    | 0.2917681   | 1.8228560  | 0.03842214 | 0           | 0.3582046   | 0.09207673 |
| 0.0982798    | 0.08873872  | 0.1482528  | 0.05670316 | 0.05001557  | 0.09216346  |            |
| 0.02388745   | 0.07936377  | 0.03553891 | 2.5824580  | 0.05786283  | 0.009538246 |            |
| 0.2475608    | 0.6407457   | 3.6938680  | 0.04087309 | 0.5919933   | 0.3531292   | 0          |
| 0.2165995    | 0.5909228   | 0.01369287 | 0.5547197  | 0.05446339  | 0           | 0.2401535  |
| 0            | 0.008865746 | 0.1311137  | 0.1842313  | 0.1782762   | 0.2977497   | 0.01362436 |
| 0.1399664    | 0.1139316   | 0.2024452  | 0.4388991  | 0.2829267   | 0.6099899   |            |
| 0.09560221   | 0.01923935  | 0.1397617  | 0.06749916 | 0.2779631   | 0.02276422  |            |
| 0.2920289    | 0.2220164   | 0.2820111  | 0.1788128  | 0.2191363   | 0.09769217  |            |
| 0.03968188   | 0.5027390   | 0          | 0.07128132 | 0.02401913  | 0.003135034 | 0.3798194  |
| 0.03960974   | 0           | 0.2315831  | 0.4474830  | 0.003611032 | 0           | 0.04735947 |
| 0.8144058    | 0.2101481   | 0.03989992 | 0.05658534 | 0.3255771   | 0.1737269   |            |
| 0.7607584    | 0           | 0          | 0.1162919  | 0.9586878   | 0           | 0.2055222  |
| 0.3163848    | 0.1647286   | 0.1317383  | 0.06351415 | 0.1675797   | 0.03636954  |            |
| 0.1186135    | 1.2485170   | 0.02479835 | 0.4174055  | 0.1485365   | 0.9312455   |            |
| 0.2593495    | 0.1162919   | 0.04205667 | 0          | 1.2963190   | 0.1190457   | 0.06512812 |
| 0.1520793    | 0.05287707  | 0.08038876 | 0.8389391  | 0           | 0.03356757  | 0.07630597 |
| 0            | 0.0929013   | 0.4635182  | 0          | 0.1042361   | 0.1870217   | 0          |
| 0.1094741    | 0           | 0          | 0.5852782  | 0.4726831   | 0.02814645  | 0.1044027  |
| 0.1160854    | 0.3536584   | 0.1661290  | 0.06159855 | 0.6189021   | 0.3678578   |            |
| 0.05419242   | 0.1003933   | 0          | 0.4001177  | 0.03213179  | 0.07822389  | 0.08506883 |
| 0            | 0.2740296   | 0          | 0.08864844 | 0.1932182   | 0.3175256   | 0.2226782  |
| 0.2372271    | 0.09477044  | 0.2038396  | 0.0957598  | 0           | 0.3326008   | 0.4445991  |
| 0.07752795   | 0.05287707  | 0.3113727  | 0          | 0.3093778   | 0.2473217   | 0.05090036 |
| 0.2796253    | 0.03989992  | 0.4951217  | 0.06641876 | 0.1109022   | 0.1374832   | 0          |
| 0.06076807   | 0.0767090   | 0.1026643  | 0.1437977  | 0           | 0           | 0.07683437 |
| 0.2367973    | 0.7936377   | 0.2151286  | 0.7607168  | 0.04843881  | 0.06829265  |            |
| 0.04167912   | 0.3713413   | 0.07603963 | 0          | 0.09311353  | 0.4133706   | 0.0313910  |
| 0.09970414   | 0.08267687  | 0.2176794  | 1.0318630  | 0.0237572   | 0.3939485   |            |
| 0.05536304   | 0.1688787   | 0.06697004 | 0.0991370  | 0           | 0           | 1.5178320  |
| 0.07626145   | 3.5437510   | 0.1216379  | 0.04116485 | 0.1207929   | 0.07968308  |            |
| 0.02740296   | 0.02659994  | 0.3067560  | 0.09444518 | 0.8983651   | 0.03085744  |            |
| 0.7233419    | 0.6487598   | 0.09066737 | 0.2450546  | 0           | 0.47507     | 0.1417087  |
| 0.2776135    | 0           | 0.08560061 |            |             |             |            |
| TCGA-DK-A2HX | 1420        | 1          | 0.1326788  | 0.1091418   | 0.03701329  | 0.1321662  |
| 0.7987901    | 28.989560   | 0.5333734  | 0.1631924  | 0.1862574   | 1.4050680   | 0.02017031 |
| 3.7802180    | 0.4377224   | 0.4729476  | 0.06618383 | 0.7327466   | 0.1449636   |            |

|                                   |                    |                           |                            |                    |                           |
|-----------------------------------|--------------------|---------------------------|----------------------------|--------------------|---------------------------|
| 0.01436209                        | 1.24492            | 0.03648453                | 0.03350046                 | 0                  | 1.74588918.250670.1362642 |
| 0.1645815                         | 0.2349383          | 0.3663847                 | 2.0028490.4873291          | 0.3719490.1020966  |                           |
| 0.2631309                         | 0.6489774          | 1.1866470.09793216        | 0.5894989                  | 0.1399532          |                           |
| 0.2260104                         | 0.04271885         | 0.09241505                | 0.09521182                 | 0.5799423          | 0.1416528                 |
| 2.4926780.06475256                | 0.07687754         | 0.1013814                 | 0.08222839                 | 0.1330165          |                           |
| 4.6480680.1629141.4419760.3157898 | 0.05440676         | 0.2877779                 | 0                          | 0.3147316          |                           |
| 0.1005014                         | 0                  | 0.2062546                 | 0.09116345                 | 0.4385514          | 1.1028260.07349056        |
| 0.03059661                        | 0.5210938          | 0.9889884                 | 0.05430468                 | 0.3391067          | 0.7082024                 |
| 0.1419575                         | 2.1204680.7518024  | 0.09648131                | 0.3413628                  | 0.4856728          |                           |
| 0.08123928                        | 0.3250920.02308165 | 0.2873268                 | 0.2327967                  | 0.2949747          | 0                         |
| 0.07919123                        | 0.3124518          | 0.3244887                 | 0.1054441                  | 0.0371082          | 0.05060209 0              |
| 0.0177573                         | 0.06382446         | 0.6247890.2415037         | 1.36828                    | 0.6541106          | 2.964767                  |
| 1.0482560.2278897                 | 0.08377538         | 0.0314613                 | 4.3391940.5410167          | 0.3722752          |                           |
| 0.3975878                         | 0.2464241          | 0.07522909                | 0.02308165                 | 0.3675479          | 0.1814064                 |
| 0.2402024                         | 0.02575124         | 1.3615720.1014406         | 0.2730603                  | 0.02890826         | 0                         |
| 0.03002531                        | 0.2462189          | 1.6719950.2953510.0556623 | 0.07248179                 | 0.07091639         |                           |
| 1.9465530.09060567                | 0.9705011          | 0.03289136                | 1.2693220.04307201         | 6.64382            |                           |
| 1.1343070.04020055                | 0.3269202          | 1.5025780.1108670.1340018 | 0                          | 0.1053801          |                           |
| 0.08010441                        | 0.5483255          | 0                         | 0.3344884                  | 0.2281082          | 0.2489840.1542878         |
| 0.6998161                         | 0.02911911         | 0.04616331                | 0.4614632                  | 0                  | 0.2783115 0               |
| 0.05234068                        | 0.02695009         | 0.4320059                 | 1.1446080.3178648          | 0.0924741          |                           |
| 0.3084660.3289136                 | 0.2326528          | 2.2051570.7126461         | 1.3304650.03600049         |                    |                           |
| 0.1333843                         | 0.1065438          | 0.3217598                 | 0.1280725                  | 0.0779472          | 0.2106355                 |
| 0.05656885                        | 0.5071120          | 0.1693085                 | 0.7701391                  | 0.1749217          | 0.07396353                |
| 0.05253066                        | 0.1023048          | 0.2158135                 | 0.1272281                  | 0.3377712          | 0.06628487                |
| 0.7876026                         | 0.1545074          | 0.5620271                 | 0.3281030                  | 0.2226492          | 0.6152432                 |
| 2.1866090.1266528                 | 0.2385527          | 0.8161929                 | 0.3309191                  | 0.06446413         |                           |
| 0.2473555                         | 0.1450847          | 0.07266375                | 0                          | 0.1773219          | 0.1432891 0.1160096       |
| 0.04170662                        | 1.0942850.3650644  | 0.4404582                 | 0.3954152                  | 0.0571647          |                           |
| 0.3746565                         | 0.04826747         | 0.1209797                 | 3.8762910.02740946         | 0.05051378         | 0                         |
| 2.1585650.1637998                 | 0.1459732          | 0.2246239                 | 0.09935147                 | 0.02746147         |                           |
| 0.6998944                         | 0.3435256          | 0.2372491                 | 0.1420390.2355330.07355627 | 0.1121876          |                           |
| 0.07118203                        | 0.03292878         | 0.05697715                | 0.02246073                 | 0                  | 0.8896842 0.09312868      |
| 0.08443522                        | 0.3087402          | 0.1292882                 | 0.1731924                  | 0.2643324          | 0.2964312                 |
| 0.07281609                        | 0.03534114         | 0.2000069                 | 0.4417008                  | 0.02091358         | 0.7387116                 |
| 0.02049886                        | 0.3674581          | 13.394760.07696197        | 0.1465127                  | 0.08588841         |                           |
| 0.2705084                         | 0.08786243         | 0.01939973                | 0.1844210                  | 0.08529782         |                           |
| TCGA-CF-A8HY                      | 345 0              | 0.1023942                 | 0 0                        | 0.07892746         | 0 149.42410               |
| 0.1612450.4048765                 | 0 0                | 0.1054059                 | 0.0457451                  | 1.8030750.05533344 |                           |
| 0.04235382                        | 0                  | 0.1921204                 | 0.07434458                 | 0.01016771         | 0.05601657 0              |
| 1.650556173.55280.03928435        | 0.2751989          | 0                         | 0.1225274                  | 0                  | 1.851977                  |
| 0.05654009                        | 0                  | 0.03666539                | 0.07234427                 | 0.08182303         | 0.01819486 0.3449982      |
| 0.03466928                        | 0.1196731          | 0.06349402                | 0.03863212                 | 0.01326708         | 0.1763145 0               |
| 12.111840                         | 0.09641099         | 0.01059508                | 2.4061660.04448375         | 8.1556380          | 0                         |

|              |            |             |             |             |            |            |             |             |
|--------------|------------|-------------|-------------|-------------|------------|------------|-------------|-------------|
| 0.06034703   | 0.2729229  | 1.4309291   | 3.127930    | 0.01368903  | 1.9045630  | 0          |             |             |
| 0.9146139    | 0          | 0.02215815  | 0.04096153  | 0           | 0.5148757  | 0.05512337 |             |             |
| 0.007566967  | 0.1371834  | 0.03615862  | 0.1873967   | 0.1772832   | 0.05237913 |            |             |             |
| 0.06453109   | 0.02654872 | 0.007123686 | 0.05821771  | 0.03748902  | 0.03859515 |            |             |             |
| 0.2781513    | 0          | 0.4007504   | 0           | 0.09931256  | 0.07124385 | 0          | 0           | 0.06204913  |
| 0            | 0          | 0.01979481  | 0.08004132  | 0.003482395 | 0.02410875 | 0.08799694 | 0           |             |
| 0.09187228   | 0.7586764  | 0.004011132 | 0           | 0           | 0.08245029 | 1.5265830  | 0.5835810   |             |
| 0.02793554   | 0.3930988  | 0           | 0.1536455   | 0           | 0          | 2.8275190  | 1.31269     |             |
| 0.01208447   | 0          | 0.2008229   | 0           | 0.02695642  | 0          | 0          | 0.04039926  | 0.008783724 |
| 0.9198511    | 0          | 0.1961612   | 0.05499809  | 0.3376627   | 0          | 0.08611801 |             |             |
| 0.09343305   | 0          | 0.9199681   | 0           | 0.08590883  | 0          | 0.08446478 | 0           | 0.08929579  |
| 0.7966183    | 0          | 0           | 0           | 0           | 3.0892540  | 0.04869046 | 0           | 0.03561319  |
| 0            | 0.1312793  | 0           | 0.3611815   | 0.4191980   | 0.0386568  | 0.1719301  |             |             |
| 0.4714122    | 0.02992476 | 0.04561576  | 0           | 0.2270090   | 0.01393961 | 0.02969222 |             |             |
| 0.5497151    | 0.2141519  | 0           | 0.04295201  | 0.01576492  | 0          | 0          | 0.04923532  |             |
| 0.05365667   | 0.6710041  | 0.04122514  | 0           | 0.08772579  | 2.1085820  | 0.2659248  |             |             |
| 0.2172276    | 0.07389056 | 0           | 0.0430590   | 0.05873582  | 0.1490830  | 0.1113702  |             |             |
| 0.09352332   | 0.1319269  | 0.02823706  | 0           | 0.6110899   | 0.1475559  | 0.01539877 |             |             |
| 0.08908447   | 0          | 0.03150053  | 0           | 0.2280788   | 0          | 0          | 0.1373888   | 0           |
| 0.5260687    | 0.2644717  | 0.09558588  | 0.2476735   | 0.04035435  | 0.2275783  |            |             |             |
| 0.4558488    | 0.2291587  | 0           | 0.0636820   | 0.06419821  | 0.1691686  | 0          | 0           | 0           |
| 0.09183742   | 0.1160631  | 0.2529529   | 0.06611792  | 0.05277897  | 0          | 0          | 0           |             |
| 0.02975611   | 0.02753033 | 0           | 0           | 0.4890867   | 0.1983538  | 0          | 0.01411853  |             |
| 0.1290622    | 0.04053461 | 0.01524196  | 0.08287383  | 0.03540477  | 0.2739528  | 0          |             |             |
| 0.09465121   | 0          | 0           | 0.3103236   | 0.03427643  | 0.1890559  | 3.3726050  | 0.01119036  |             |
| 0.08166196   | 0          | 0.07538679  | 0.05246999  | 0           | 0.2921428  | 0.02985339 |             |             |
| 0.1426277    |            |             |             |             |            |            |             |             |
| TCGA-4Z-AA7W | 840        | 0           | 0           | 0.01968416  | 0          | 0.05107866 | 0.02824805  | 70.378970   |
| 0.1872972    | 0.3023305  | 0           | 0.09094493  | 0.2237141   | 0          | 1.4671260  | 0.009947102 |             |
| 0.09462866   | 0.2614477  | 0.03453681  | 0           | 0.05483444  | 0          | 0.1513113  |             |             |
| 2.75778439   | 3.13530    | 0.1779627   | 0.6926019   | 0           | 0.06607898 | 0.6991392  |             |             |
| 1.9176390    | 0          | 0           | 0           | 0.02941808  | 0.05887488 | 0.4252741  | 0.01869713  |             |
| 0.06114283   | 0.1540904  | 0.03125143  | 0           | 0           | 0.04257944 | 3.0676180  | 0           |             |
| 0.01142784   | 0.4449067  | 0           | 3.6529190   | 0.2837086   | 0.1301805  | 2.551245   |             |             |
| 0.6282862    | 0          | 0.01148387  | 0.3625166   | 0           | 0.06199809 | 0.4521467  | 0           |             |
| 0.01062212   | 0.04909008 | 0           | 0.2990317   | 0           | 0.02448517 | 0.1085084  |             |             |
| 0.009750167  | 0.09432544 | 0           | 0.2824805   | 0           | 0.01431772 | 0.06915242 |             |             |
| 0.02093119   | 0.1617425  | 0.0416287   | 0.1090959   | 0           | 0.06649986 | 0          |             |             |
| 0.0714123    | 0.08965082 | 0.9363658   | 0           | 0.1338523   | 0          | 0          | 0           | 0           |
| 0.05850828   | 0          | 0           | 0.1308033   | 1.01583     | 0.02163202 | 0          | 0           | 0.04446541  |
| 1.2196820    | 4.196334   | 0.04780439  | 0.007532813 | 0.2204779   | 0          | 0.1657219  | 0           |             |
| 0            | 0          | 1.6635060   |             |             |            |            |             |             |



|              |            |             |            |            |            |            |           |
|--------------|------------|-------------|------------|------------|------------|------------|-----------|
| 0.04833555   | 0.04555183 | 0           | 0.1926288  | 0.6160531  | 0          | 0          | 0.1371341 |
| 0.0561316    | 0.2226115  | 1.0097170   | 0          | 0.1600515  | 0          | 0.05019461 |           |
| 0.06558089   | 0.1887971  | 0           | 0.5453981  | 0.05480566 | 0.03372248 | 0.1250856  |           |
| 0.2781655    | 0.2542324  | 0.1075894   | 0.1148026  | 0          | 0.0979407  | 0          |           |
| 0.01503525   | 0          | 0.5046147   | 0.4234707  | 0.04686032 | 0.1111872  | 0.01700404 |           |
| 0.1172560    | 0.06638147 | 0.1736221   | 0.2876420  | 0.04446541 | 0.04737059 |            |           |
| 0.05677258   | 1.97667    | 0.2294611   | 0          | 0          | 1.0653550  | 0.04644341 | 0.1900573 |
| 0.2765775    | 0          | 0.2848651   | 0.1008742  | 0.1422962  | 0.03045647 | 0.5258483  |           |
| 1.0326230    | 0.03978841 | 0.008304548 | 0.1166764  | 0          | 0.0679529  | 0          | 0.5412124 |
| 0.1722851    | 0          | 0           | 0.09654636 | 0          | 0.2837086  | 0.3328021  | 0.1718314 |
| 0.3928536    | 0.01450872 | 0.05454795  | 0.1267608  | 0          | 0          | 0.06868736 |           |
| 0.2538952    | 0.2259092  | 0           | 0.05787405 | 0.05972814 | 0.2476394  | 0.0312964  |           |
| 0.3239913    | 0.07131474 | 0           | 0.04719927 | 0.1658272  | 0.1011674  | 0.04011865 |           |
| 0.08908258   | 0          | 0.02700589  | 0          | 0.1604582  | 0          | 0.01522824 | 0.6264287 |
| 0.1020147    | 0.01095998 | 0.01702622  | 0.01909378 | 0          | 0          | 0.1565391  | 0         |
| 0.7416231    | 0          | 0.3058734   | 1.4923850  | 0.01206992 | 0.4991230  | 0          | 0.4980280 |
| 0.1575525    | 0          | 0.1153786   |            |            |            |            |           |
| TCGA-FD-A43U | 636        | 0           | 0.03026713 | 0.04855067 | 0.05488337 | 0.1399830  | 0.1625712 |
| 48.467810    | 0.05272579 | 0.4179688   | 0.3314193  | 0          | 0.05981713 | 1.495554   |           |
| 0.2028298    | 5.7225060  | 0.08178124  | 0.06975176 | 0.3224283  | 0.01419742 |            |           |
| 0.1977825    | 0.07213243 | 0.3477217   | 0.1866035  | 3.20095538 | 0.019360   | 0.05573869 |           |
| 0.1301556    | 0.3483668  | 0           | 0.4790044  | 1.9707611  | 1.1531920  | 0.03784726 |           |
| 0.06502848   | 0.2886914  | 0.1511651   | 0          | 0.5244659  | 0.05380221 | 0.3574704  |           |
| 0.04222905   | 0.04110996 | 0.02353004  | 0.3908815  | 0.03500717 | 22.00295   |            |           |
| 0.0480076    | 0.1424927  | 0.01879107  | 3.2920670  | 1.183423   | 4.3830050  |            |           |
| 0.3110058    | 0.1605441  | 0           | 1.7180990  | 0.1106015  | 7.5008540  | 0          | 2.26422   |
| 0.1300570    | 0.02619928 | 0.5448596   | 0.0453687  | 0.1756088  | 0.3910596  |            |           |
| 0.02684102   | 0.1297620  | 0.01603242  | 0.1107868  | 0.5109381  | 1.1147740  | 0.2575128  |           |
| 0.1883436    | 0.1326604  | 0.1548794   | 0.1496008  | 0.03422551 | 0.1345417  | 0          |           |
| 0.6560835    | 0          | 0.08806866  | 0.1790038  | 0.1924610  | 0.05502409 | 0          |           |
| 0.09092965   | 0.02633055 | 0.09463902  | 0.03705753 | 0.2351715  | 0.07803417 |            |           |
| 0.1212395    | 0.3421772  | 1.06717     | 0.1671791  | 0.06211113 | 0          | 0          | 6.768735  |
| 2.1045390    | 0.07860585 | 0.06812507  | 0.6832427  | 0.03422551 | 0.3951254  | 0          |           |
| 0.1335647    | 0.03818398 | 3.6471210   | 1.7714120  | 0.0107163  | 0.1019449  |            |           |
| 0.4897373    | 0.2028298  | 1.4342690   | 0.2502554  | 0.4952169  | 0          | 0.04673553 |           |
| 1.0917940    | 0.04885463 | 0.6009264   | 0          | 1.7253070  | 0.09580088 | 0.5345757  |           |
| 0.1988516    | 0          | 2.7075490   | 0.1172645  | 0.1002401  | 0          | 0.1123529  | 0.1562577 |
| 0.1979649    | 1.3728680  | 0           | 0.1503285  | 0          | 0.3202895  | 14.610650  |           |
| 0.03422551   | 0.03684468 | 0.1114774   | 0.1238042  | 0          | 0.1164163  | 0          |           |
| 1.0889840    | 0.4693656  | 0.3881545   | 0.03428019 | 1.0291360  | 0.9754271  | 0.2034485  |           |
| 1.7798560    | 1.3688920  | 0.02472281  | 0.2369749  | 1.4728050  | 0.1582551  |            |           |
| 0.07705349   | 0.2056811  | 0.01398006  | 0.5398590  | 0.0919032  | 0.1091526  |            |           |
| 0.1903272    | 0.6942073  | 0.03655775  | 0          | 0.1594771  | 2.7859570  | 0.2358175  |           |
| 0.07705349   | 0          | 3.1386190   | 0.2083437  | 0.3543074  | 0.08029709 | 0.3329663  |           |

|                    |                    |                           |                   |                    |                   |                    |            |
|--------------------|--------------------|---------------------------|-------------------|--------------------|-------------------|--------------------|------------|
| 0.4405915          | 0.8356463          | 0.05008027                | 0.1572117         | 0.7044752          | 0.2617            |                    |            |
| 0.04779376         | 0.3103515          | 0                         | 0.06384944        | 0                  | 1.4966970.2124693 | 0.3870432          |            |
| 0.06184264         | 0.5353312          | 0                         | 2.0059870.5863223 | 0.08476391         | 0.6976565         |                    |            |
| 0.1312137          | 0.8296737          | 0.1073759                 | 0.0406428         | 0                  | 0                 | 0.1454874          |            |
| 0.1643030.03092132 | 0.3330727          | 0.04910617                | 0.3257593         | 0.1114997          |                   |                    |            |
| 0.7804267          | 0.1758967          | 0.1170087                 | 0                 | 0.2726734          | 0.08317596        | 0.03298401         |            |
| 0.07324026         | 0                  | 0                         | 0                 | 1.3631990.05523654 | 0                 | 0.1144501          | 0.1557634  |
| 0.02703262         | 0.06999151         | 0.03139634                | 0.02699295        | 0.02620195         | 0.2350182         |                    |            |
| 1.3099090.06202138 | 0.8903195          | 0.3039575                 | 2.17947           | 6.5822450.01984684 |                   |                    |            |
| 0.7000253          | 0.1273555          | 0.2674068                 | 0.1582002         | 0                  | 0.6476679         | 0.1164833          |            |
| 0.1580997          |                    |                           |                   |                    |                   |                    |            |
| TCGA-BT-A0S7       | 200                | 1                         | 0                 | 0.04856665         | 0                 | 0.04200873         | 0.1045445  |
| 0.1650420.08288209 | 2.9698740          | 0.6198339                 | 0                 | 0.0420911          | 0.0490849         |                    |            |
| 0.02415279         | 0.05375575         | 0.1491220.2473095         | 0.08117569        | 0.07453632         |                   |                    |            |
| 0.2799973          | 0.8672108          | 158.98540.3345423         | 0.0976488         | 0                  | 0.4075910         |                    |            |
| 0.2628546          | 0.1504658          | 0                         | 0.09757482        | 0.09626216         | 0.09072891        | 0.04842059         |            |
| 0.06557982         | 0.06919705         | 0.3603818                 | 0.04224295        | 0.1901961          | 0.0882667         |                    |            |
| 0.05865153         | 0                  | 0.2283666                 | 0.0720351         | 0                  | 0.07048969        | 0                  | 0.1183812  |
| 5.8159730.1208244  | 3.3833010.1806716  | 0                         | 0.05054897        | 0.6987275          |                   |                    |            |
| 0.02023865         | 0.1490726          | 0.08049923                | 0.1529677         | 0                  | 0                 | 0.01637994         |            |
| 0.01816797         | 0                  | 0.9485998                 | 1.0268690.0100687 | 0.2798915          | 0                 | 0.08311743         |            |
| 0.5307641          | 0.1393926          | 0                         | 0                 | 0                  | 0.05164345        | 0.1247083          | 0.05135517 |
| 0.2018789          | 0.1726525          | 0.04101872                | 0.1389415         | 0.1321465          | 0.4502901         | 0                  |            |
| 0.05865153         | 0.4128166          | 0                         | 0                 | 0                  | 0.07100263        | 0.3104590.05613894 | 0          |
| 0.1760348          | 1.1487460          | 0.04659869                | 0                 | 0                  | 0.07523292        | 0                  | 0.05897379 |
| 0.1300998          | 0.2092248          | 0                         | 0.8382142         | 0                  | 0                 | 0.05729483         | 0.7654960  |
| 0.07594267         | 0.04019937         | 0                         | 0.06680434        | 0                  | 0.2664519         | 0                  | 0.2476899  |
| 0.07597023         | 1.1863040.03665304 | 0.8305005                 | 0.1463622         | 0.3423223          | 0                 |                    |            |
| 0.1145897          | 0.1367554          | 0.08944359                | 0.7273760         | 0.1143113          | 0.1192581         | 0                  |            |
| 0                  | 1.0099530.4799954  | 0                         | 0.3473002         | 0                  | 0                 | 0                  | 0.1027103  |
| 0.3869965          | 0.1672711          | 1.3003720.3236150.1164546 | 0                 | 0.8650663          |                   |                    |            |
| 1.7297120.08320334 | 0.1543116          | 0.1715792                 | 0.2090889         | 0.08627288         |                   |                    |            |
| 0.1315099          | 0.06098426         | 0.3020609                 | 0                 | 0.1112893          | 0.1580353         | 0.2178809          |            |
| 0                  | 0.2312366          | 0.04572196                | 0.06293099        | 0.1157222          | 0                 | 0                  | 0.4283773  |
| 0.2976154          | 0.05485467         | 0                         | 0.04085515        | 0.1694721          | 0                 | 0                  | 0          |
| 0.1145897          | 0.07815459         | 1.4600160.03012132        | 0.6308684         | 0.8088811          |                   |                    |            |
| 0.1504658          | 0.1690766          | 0.1769214                 | 0.1084165         | 0                  | 0.07171424        | 0.08466919         |            |
| 0.08070098         | 0.08981783         | 0                         | 0                 | 0.1062696          | 0.06452844        | 0                  | 0.4071703  |
| 0.8122445          | 0.06999933         | 0.3519092                 | 0.3391673         | 0.6203432          | 0                 | 0.03364649         |            |
| 0.0142162          | 0.1829528          | 0                         | 0                 | 0.04745717         | 0.3322871         | 0.0927945          |            |
| 0.07139621         | 0                  | 0                         | 0.5662616         | 0.5329217          | 0.0879773         | 0.07022834         | 0          |
| 0.1227434          | 0                  | 0.02969538                | 0.3663219         | 0                  | 0                 | 0.3395398          | 0.7917957  |
| 0.08288209         | 0.01878628         | 0.2575975                 | 0.1078717         | 0.01352076         | 0.1207751         | 0                  |            |
| 0                  | 0.03931586         | 0.08396269                | 0.05780914        | 0                  | 0.9068055         | 0.1824345          |            |

|              |            |             |            |             |            |             |            |           |
|--------------|------------|-------------|------------|-------------|------------|-------------|------------|-----------|
|              | 0.2515601  | 3.3561320   | 0.01489003 | 0.03622013  | 0          | 0.2006211   | 0.2653054  | 0         |
|              | 0.02159604 | 0.02383397  | 0.06326069 |             |            |             |            |           |
| TCGA-ZF-A9R3 | 949        | 1           | 0.2462455  | 0.2633304   | 0.1880071  | 0.5634386   |            |           |
|              | 0.01988928 | 46.980680   | 0.04515403 | 0.1601336   | 0.3311296  | 0.6244846   |            |           |
|              | 0.2049080  | 4312315     | 0.5905874  | 0.2882775   | 0.07704062 | 0.04594997  |            |           |
|              | 0.1227225  | 0.01215858  | 0.1411497  | 0.1235475   | 0.06381142 | 0           | 2.43962    |           |
|              | 23.4947    | 0.0358007   | 0.01393305 | 0           | 0.1395774  | 0           | 1.5377250  | 0.3241215 |
|              | 0.02784499 | 1.3735190   | 0.2692702  | 0.3178097   | 0.6737239  | 0.3949360   | 0.1243675  |           |
|              | 0.02410979 | 0.1525606   | 0.3224156  | 0.1004245   | 0          | 15.566110   | 0.3700206  |           |
|              | 0.1708417  | 0.008046274 | 1.0441870  | 0.6080853   | 3.3029280  | 0.2413582   | 0.63014    |           |
|              | 0.2406057  | 0           | 0.6731755  | 0           | 0.0358082  | 1.0209830   | 0.08730494 |           |
|              | 0.1736475  | 0           | 0.02430664 | 0.2626866   | 0.1942673  | 0.5714830   | 0.3767636  |           |
|              | 0.01149324 | 0.2500366   | 0.2540062  | 0.7400412   | 1.95220914 | 4.39610     | 0.3920574  |           |
|              | 0.0705671  | 0.01081995  | 0.2505379  | 0.08541142  | 0.2931051  | 0.4608825   |            |           |
|              | 0.1970798  | 0.2809328   | 0          | 0.2765453   | 0.1713327  | 0.2472335   | 0.2008491  |           |
|              | 0.5183451  | 0.1285153   | 0.1946789  | 0.08268082  | 0.1013103  | 0.007933958 |            |           |
|              | 0.5538482  | 0.03341398  | 0.05191438 | 0.1367512   | 3.83448    | 0.003046194 |            |           |
|              | 0.02659579 | 0           | 0.1252313  | 1.5457871   | 0.0045680  | 0.06731755  | 0.2704941  |           |
|              | 0.7164792  | 0.1758631   | 0.6534290  | 0.1535740   | 0.1525120  | 0.1308021   | 2.825907   |           |
|              | 0.1717541  | 0.2167180   | 0.01376606 | 0.08730494  | 0.1525120  | 0.1389617   | 0.1052828  |           |
|              | 1.3930610  | 0.2827337   | 0.06136124 | 0.2401441   | 1.9774820  | 0.1882746   | 0.2979434  |           |
|              | 0.2506049  | 1.00945     | 0.1640865  | 0.1635026   | 0.04966943 | 0.1020983   |            |           |
|              | 0.7999105  | 0.6025472   | 0.1579547  | 0.1361310   | 0.4810914  | 0.3122423   |            |           |
|              | 0.5086077  | 0.9245919   | 0.1091744  | 0           | 0          | 0.07904383  | 0.3526636  |           |
|              | 0.7109358  | 0.1848862   | 0.05862102 | 0.3155355   | 1.0501540  | 0.5301257   |            |           |
|              | 0.1385253  | 0.1661636   | 0.1026687  | 0.6034465   | 1.1640810  | 0.3324130   | 0.176144   |           |
|              | 0.5222789  | 0.2386713   | 0.6135997  | 0.2598165   | 0.6613184  | 0.9654321   |            |           |
|              | 0.1371469  | 0.3387593   | 0.02254931 | 0.5951210   | 0.08131721 | 0.1979643   |            |           |
|              | 0.05871467 | 0.4190353   | 0.2146541  | 0.2361159   | 0.2430417  | 0.6927289   |            |           |
|              | 0.3070570  | 0.8766190   | 0.3668867  | 0.1665551   | 0.3062948  | 0.2423432   | 0.03299406 |           |
|              | 0.08417263 | 0.1875275   | 0.6540103  | 0.1784242   | 1.8613190  | 0.01719148  |            |           |
|              | 0.6597120  | 0.2485871   | 0.1145027  | 0.1608316   | 0.1682939  | 0.4640831   |            |           |
|              | 0.2801477  | 0.3800668   | 0.3431018  | 0.1842375   | 0.07860286 | 0           | 0.9006974  |           |
|              | 0.4852195  | 0.07365808  | 0.3177699  | 0.3288223   | 0.7284850  | 0.7191272   | 0.309764   |           |
|              | 0.2661680  | 0.7081109   | 0.02043101 | 0.09601719  | 1.2468160  | 0.1044187   | 0.09621827 |           |
|              | 0          | 0.02166861  | 0.1896499  | 0.1324041   | 0.04074876 | 0.04205421  | 0          |           |
|              | 0.7198296  | 0.6303324   | 0.1004245  | 0.1603288   | 0.06646543 | 0.04670315  | 0          |           |
|              | 0.1807827  | 0.5435949   | 0          | 0.009507341 | 0          | 2.0335970   | 0.07095633 | 0.1715537 |
|              | 0.2940430  | 0.3180951   | 0.1196113  | 0.2307701   | 0.9007354  | 0.02311659  |            |           |
|              | 0.04487836 | 0.5654674   | 0.2639525  | 0.07967207  | 2.4445050  | 0.02603072  |            |           |
|              | 1.1127125  | 0.4290260   | 0.1954621  | 0.1653785   | 0.05453321 | 0.9160219   | 0.00796951 |           |
|              | 0.02463497 | 0.6039617   | 0.0317404  | 0.1173428   |            |             |            |           |
| TCGA-4Z-AA89 | 1029       | 0           | 0.09301956 | 0.3183149   | 0.06746892 | 0.2064998   |            |           |
|              | 0.1142006  | 99.958350   | 0.3109933  | 0.5092731   | 0.5122397  | 0.1654517   |            |           |

|            |            |              |            |            |            |             |
|------------|------------|--------------|------------|------------|------------|-------------|
| 0.04448    | 0.7978933  | 1.4138490    | 0.1306953  | 0.04287342 | 0.08808129 | 0.4101476   |
| 0          | 0.09975761 | 0.3969265    | 0.3058591  | 3.165642   | 112.12560  | 0.08565048  |
| 0.06000079 | 0.1713010  | 0.1335714    | 0          | 1.0767490  | 0.1395786  | 0           |
| 0.1189308  | 0          | 0.3223668    | 0.2078681  | 0.08926198 | 0.05191279 | 0.05053706  |
| 0.2458695  | 0.09610327 | 0            | 15.555580  | 0.2950822  | 0.2802693  | 0.01155006  |
| 1.4988830  | 0.67890612 | 0.022620     | 0.09898817 | 1.1947620  | 0.0328932  | 0.09917424  |
| 1.44947    | 0.7155610  | 0.008290492  | 1.1602470  | 0.1253223  | 0.2492631  | 0           |
| 0          | 0.2230896  | 0.3885812    | 0.06009191 | 0.02474704 | 0.3688862  | 0.06898111  |
| 0.2996219  | 0.8696818  | 6.6236370    | 0.0351738  | 0.01447084 | 0.03882889 |             |
| 0.2961707  | 0          | 0.1262218    | 0.2756567  | 0.3536240  | 0.2016332  | 0           |
| 0.03608803 | 0.0776654  | 0            | 0.1441549  | 0.2705677  | 0          | 0           |
| 0.1510531  | 0.01518512 | 1.1366870    | 0          | 0.1922941  | 1.6541190  | 0.004372675 |
| 0          | 2.8352710  | 0.5513577    | 0.04831565 | 0.2131745  | 0.4628131  | 0.08414784  |
| 0.8039725  | 0.25719    | 0            | 0.09388024 | 2.1750110  | 0.4977424  | 0           |
| 0.06266116 | 0          | 0.3989466    | 0.02938613 | 0.9998382  | 0          | 0.2642439   |
| 0.2489615  | 1.75869    | 0.09008656   | 0.6026461  | 0.05995533 | 0.8705807  | 0.03925647  |
| 0.04694012 | 0.07129824 | 0.07327874   | 1.0755620  | 0.2883098  | 0.1774463  | 0           |
| 0.184156   | 0.1920899  | 0.5353945    | 1.2780540  | 0          | 0          | 0           |
| 0.2249923  | 1.479749   | 0.1061583    | 0          | 1.0288140  | 0.4111223  | 0.3043886   |
| 0.2651291  | 0.1431122  | 0            | 0.7874730  | 0.7477894  | 0          | 0.5478347   |
| 0.5154242  | 1.2847570  | 0.4675824    | 0.07459099 | 0.7994045  | 0.5939290  | 0.04558816  |
| 0          | 0.7522670  | 0.1556363    | 0.1420845  | 0.02809409 | 0.1031154  | 0.07110606  |
| 0.05648897 | 0.2146925  | 0.1754790    | 0.3000964  | 0.7190555  | 0.3351405  | 0.09085129  |
| 0.6479383  | 0.05797878 | 0.04736148   | 0.08055068 | 0.08972907 | 0.6571617  | 0           |
| 0.5590709  | 0.02467759 | 0.5758235    | 0.7455315  | 0.02054544 | 0.09234661 | 0.04831565  |
| 0.02220568 | 0.08042789 | 0.1510806    | 0.3676462  | 0.1322323  | 0.06622681 | 0           |
| 0.5718643  | 0          | 0.1057329    | 0          | 0.1180024  | 0.04753216 | 0.7455315   |
| 0.6727229  | 0.1910361  | 0.5399951    | 0.08798337 | 0.2205254  | 0.1048226  | 0           |
| 0.1381170  | 0          | 0.4303053    | 0.07602405 | 0.1169860  | 0.1001152  | 0.56936     |
| 0.8042789  | 0.07207745 | 0.3164491    | 0.04770406 | 0.2681611  | 0          | 0.08109544  |
| 0.09003531 | 0          | 0            | 0.01159066 | 1.5676850  | 0.03395154 | 0.1077377   |
| 0.1406952  | 0.1325646  | 0.08307899   | 0.2108019  | 0.5596416  | 0.09954848 | 0           |
| 0.4058515  | 0.09472297 | 0.3430970    | 0.8026206  | 0          | 2.4216336  | 0.0019610   |
| 0.1524876  | 0          | 0            | 0.2465453  | 0.02287975 | 0.07072479 | 0.6546431   |
| 0.0585796  | 0.05182779 | TCGA-GU-A42P | 332        | 1          | 0.1461273  | 0.4464739   |
| 0.1135597  | 0.3765322  | 0            | 19.650570  | 0.03636514 | 0.1289648  | 1.1429040   |
| 0.2873905  | 0.2269083  | 0.05406996   | 0.8393541  | 0.9673602  | 0.6035310  | 0.09436569  |
| 0.1976709  | 0.6903361  | 0.2955575    | 0.01243749 | 0.01713034 | 0.04290032 | 8.05247655  |
| 9.961880   | 1.922157   | 0.06732651   | 0.6727550  | 0.1498796  | 0          | 1.4951641   |
| 1.9711090  | 0.5481708  | 0.04485033   | 1.0398040  | 0.4003546  | 0.2225656  | 0.4220133   |
| 0.4664949  | 0.07704638 | 0.04368826   | 0.1193217  | 0.1217155  | 0.5661436  | 0.02414455  |
| 10.04702   | 0.3642208  | 0.1965553    | 0.0712814  | 1.5136993  | 0.0199774  | 5.942090    |
| 0.6386755  | 1.0456950  | 0.08304582   | 0          | 0.7667506  | 0.6691054  | 0.01488433  |
| 0.4453887  | 0          | 0.3164026    | 0.5593931  | 0          | 0.00150581 | 0.2644457   |
| 0.3754912  | 0.3391302  |              |            |            |            |             |

|             |              |             |             |             |              |
|-------------|--------------|-------------|-------------|-------------|--------------|
| 0.1348575   | 0.004628083  | 0.4027377   | 0.2709114   | 0.4737418   | 1.192723     |
| 2.6269480   | 0.4144171    | 0.04871293  | 0           | 0.4866279   | 0.02292891   |
| 0.09442176  | 0.4949002    | 1.3887970   | 0.3770856   | 0.04789842  | 0.8098829    |
| 0.09441017  | 0.06637045   | 0.4583067   | 0.9487571   | 0           | 0.03135723   |
| 0.2058163   | 0.01490923   | 0.6930298   | 0.1345510   | 0.5484205   | 1.5680650    |
| 0.009813102 | 0.2784485    | 0.03217524  | 0.07564196  | 6.5012031   | 4.515070     |
| 0.1355367   | 0.3558301    | 0.3304761   | 2.2365370   | 0.3504323   | 0.1535333    |
| 0.2370205   | 4.8511860    | 0.03458087  | 0.8028633   | 0.1736901   | 0.3515584    |
| 0.4605999   | 1.2310530    | 0.1036325   | 0.5609561   | 0.05692542  | 0.1235443    |
| 0.4647016   | 1.6098910    | 0.2105949   | 0.5344362   | 0.2691020   | 0.5015489    |
| 0           | 0.05267121   | 0.2342954   | 0.08222561  | 0.4811218   | 1.1727260    |
| 0.4728895   | 0.08222561   | 1.6272920   | 0.5029334   | 0.4369184   | 1.1031510    |
| 0.3223895   | 0.02280525   | 0           | 1.3254280   | 0.7729526   | 0.2382392    |
| 0.1180272   | 0.6171459    | 0.07688629  | 0.7684932   | 0.1859373   | 0.2944064    |
| 0.05512332  | 1.89978      | 1.2146080   | 0.01912224  | 0.2364315   | 1.0778424    |
| 0.5651230   | 0.9273260    | 0.1627463   | 0.8129123   | 0.8608235   | 0.2577221    |
| 0.5285932   | 0.1089615    | 0.5651272   | 0.04365962  | 0.4782962   | 0.02627016   |
| 0.1157051   | 0.1329794    | 0.1901577   | 0.2936032   | 0.4922598   | 0.5051044    |
| 0.3025678   | 2.17577      | 0.5714211   | 0.8265838   | 0.2602305   | 0            |
| 0.1355781   | 0.1006844    | 0.6057189   | 0.2873905   | 1.05406     | 0            |
| 1.373995    | 0.6792551    | 0.03458087  | 0.3454051   | 0.2168588   | 1.1586340    |
| 0.2933048   | 0.2119082    | 0.3424806   | 0.4080369   | 0.1334876   | 0.02605741   |
| 1.269421    | 0.1465407    | 0           | 0.1279592   | 0.2062537   | 0.5066876    |
| 1.3191852   | 0.2825661    | 1.5237230   | 0.08227132  | 0.07732816  | 0.1633621    |
| 0.05606292  | 0.4907707    | 0           | 0.06762254  | 0.6109440   | 0.1492857    |
| 0.03281732  | 0.06773735   | 0.0561693   | 2.1295840   | 0.8589640   | 0.04043883   |
| 0.2743843   | 0            | 0.1504509   | 0.4589337   | 0.3457874   | 0.4209502    |
| 0.4078908   | 0.01531362   | 0.9884415   | 11.61605    | 0.1333388   | 0.1727026    |
| 0.2368098   | 0.3140275    | 0.1615855   | 0.5768666   | 1.1368430   | 0.1117027    |
| 0.1084294   | 0.7371360    | 0.2125761   | 0.3635988   | 0.7108163   | 0.04192807   |
| 2.2836883   | 0.1117420    | 0.2121706   | 0.03329721  | 0.08783745  | 1.198803     |
| 0.01925491  | 0            | 0.9231769   | 0.1935436   | 0.1090418   | TCGA-FD-A3NA |
| 1845        | 0            | 0.033873731 | 0.024149296 | 0           | 0.261105407  |
| 0.034655809 | 37.782494806 | 0           | 0.073858971 | 0.144243095 | 0.077723221  |
| 0           | 0.267712104  | 0.181599057 | 0.544164146 | 0.097627948 | 0.118095766  |
| 0.053459044 | 0            | 0.319727782 | 0.074000344 | 0.018531231 | 0.23204324   |
| 1.347219013 | 22.007936883 | 0.08317394  | 0.279190767 | 0.051983713 | 0.040534136  |
| 0.071477605 | 0.702522747  | 0           | 0.056476132 | 0.072777198 | 0.311125241  |
| 0.130830804 | 0.072230001  | 0.260871422 | 0.108957266 | 0.045840921 | 0.063014694  |
| 0.088183099 | 0.043889757  | 0.087491713 | 0           | 4.444791782 | 0.07163751   |
| 0.085051705 | 0.007010063  | 0.500343235 | 0.35318346  | 2.829692365 | 0.090118106  |
| 0.464086479 | 0.109801009  | 0           | 0.284863129 | 0           | 0.033209457  |
| 0.704186776 | 0.080054918  | 0           | 0.176499031 | 0.024259066 | 0.021176395  |
| 0.087327162 | 0.101549578  | 0.288250113 | 0.802372751 | 0.015019684 | 0.217836511  |
| 0.017942828 | 0.165317331  | 0.439862185 | 0.831739404 | 0.170783824 | 0.043913833  |
| 0.028279629 | 0.218273232  | 0           | 0.102143436 | 0.184034294 | 0.042924889  |
| 0.142773102 | 0.017271827  | 0.02190285  | 0.023568671 | 0.430788795 | 0.087491713  |
| 0.164215216 | 0            | 0.033921575 |             |             |              |

|                            |                           |                            |                    |                            |                   |             |          |            |
|----------------------------|---------------------------|----------------------------|--------------------|----------------------------|-------------------|-------------|----------|------------|
| 0.032742298                | 0.017652683               | 0.00691221                 | 0.223316333        | 0.116443517                | 0.045228767       |             |          |            |
| 0.240711825                | 1.003931941               | 0.045116314                | 0                  | 0.034806486                | 0.081827855       | 0.561132601 |          |            |
| 0.386116966                | 0.175944874               | 0.027724647                | 0.27049095         | 0.051071718                | 0.772593491       |             |          |            |
| 0.08919768                 | 0                         | 0.028489295                | 1.976064736        | 0                          | 0.302094029       | 0.019988743 |          |            |
| 0.114092519                | 0.298960273               | 0.090799529                | 0.287912339        | 0.140037757                | 0                 | 0.026729522 |          |            |
| 0.113326381                | 1.301477609               | 0.027338048                | 1.321466585        | 0.072777198                | 0.361709927       |             |          |            |
| 0.023825868                | 0.085467884               | 0.049454775                | 0                  | 0.890969332                | 0.174983427       | 0.038890655 |          |            |
| 0                          | 0.167654278               | 0.194308053                | 0.50218952         | 0.477346093                | 0.253639343       | 0           |          |            |
| 0.028040251                | 0                         | 0.273108461                | 0.278721183        | 0                          | 0.076607577       | 0.683323801 | 0        |            |
| 0.123161412                | 0.201143009               | 0.086858862                | 0.029815612        | 0.525733788                | 0.282958764       |             |          |            |
| 0.248232303                | 0.127883255               | 0.170632151                | 0.571820841        | 0.36958577                 | 0.065392016       |             |          |            |
| 0.151619162                | 0.570748006               | 0                          | 0.064560417        | 0.117872271                | 0.340494575       | 0.07084506  |          |            |
| 0.057490067                | 0.051153302               | 0.083444865                | 0.647344348        | 0                          | 0.06515151        | 0.177505361 |          |            |
| 0.37565763                 | 0.054551903               | 0.029058046                | 0.078357179        | 0.458794265                | 0.387078723       | 0           |          |            |
| 0.122221248                | 0.544591277               | 0.170935767                | 0.155446442        | 1.144205329                | 0.029955067       |             |          |            |
| 0.400011423                | 0.317125761               | 0.249392267                | 0.140119459        | 0.20526902                 | 0.350408731       |             |          |            |
| 0.17084891                 | 0.071318412               | 0.265235857                | 0.040127778        | 0.041683639                | 0                 | 0.392352094 |          |            |
| 0.10568306                 | 0                         | 0                          | 0.373245294        | 0.375032047                | 0.452484317       | 0.670769802 |          |            |
| 0.11594524                 | 0.424132014               | 0.044499676                | 0.033460781        | 0.438269748                | 0                 | 0           | 0        |            |
| 0.05427452                 | 0.21319552                | 0.023070581                | 0.035501072        | 0.183192031                | 0                 | 0.28796733  |          |            |
| 0.66421872                 | 0.087491713               | 0.087300892                | 0                  | 0.142410273                | 0.062058076       | 0.054141045 |          |            |
| 0.145719987                | 0                         | 0                          | 0.281388111        | 0.820234812                | 0.041212313       | 0.084071676 |          |            |
| 0.853919122                | 0.169854097               | 0.060507601                | 0.164496406        | 0.327949919                | 0.080558408       | 0           |          |            |
| 0.183698377                | 0.057490067               | 0.138823557                | 0.36233053         | 0                          | 0.875600662       | 1.554371838 |          |            |
| 0.0481255                  | 0.162090947               | 0                          | 0.049878453        | 0.041659107                | 0                 | 0.279198908 |          |            |
| 0.031603224                | 0.070775467               |                            |                    |                            |                   |             |          |            |
| TCGA-XF-A9SL               | 2020                      | 1                          | 0.1115358          | 0.05111757                 | 0                 | 0.05895359  | 4.670398 |            |
| 31.9418                    | 1.2768090.5211320.2326277 |                            | 0.1096794          | 0.03148985                 | 6.03183           |             |          |            |
| 0.1281321                  | 0.6497611                 | 0.1722101                  | 0.9829604          | 0.1508779                  | 0.007474021       |             |          |            |
| 0.6247179                  | 0.02847979                | 0.1046017                  | 0                  | 1.44745443.613630.08069273 |                   |             |          |            |
| 0.4796293                  | 1.0269980                 | 19.769721.1066432.6394820  | 0.06846656         | 0.3715002                  |                   |             |          |            |
| 1.4196830.1019277          | 2.6229250.04855437        | 0.8879981                  | 0.2148983          | 0.07033562                 |                   |             |          |            |
| 0.06193521                 | 0.04115476                | 0.6265863                  | 2.4722880.05054578 | 0.0900158                  |                   |             |          |            |
| 0.6133213                  | 1.0269980.08306605        | 6.7903510                  | 0.4093110.4084944  | 0                          |                   |             |          |            |
| 0.6148018                  | 0                         | 1.2383371.2029190.05648491 | 0.1073348          | 0.1423242                  |                   |             |          |            |
| 4.1422271.3861190.1274815  | 0.1433021                 | 0.4807227                  | 1.9557420.00706503 |                            |                   |             |          |            |
| 0.2476285                  | 2.0002880.06998647        | 0.4551898                  | 0.8313797          | 0.09037586                 |                   |             |          |            |
| 0.9915073.6980410.01811866 | 0.2975193                 | 0.03603503                 | 0.3305282          | 0                          |                   |             |          |            |
| 0.6619888                  | 0                         | 0                          | 0.2716154          | 0                          | 0.04115476        | 0           | 0        | 0.02772266 |
| 0.2740172                  | 2.48732                   | 0.2419777                  | 1.7253570.7658971  | 3.0605640.7816291          |                   |             |          |            |
| 0.02247038                 | 0.1634874                 | 0                          | 7.42868            | 1.7420580.7628188          | 1.7793780.2151806 |             |          |            |
| 0.2642569                  | 0.03603503                | 0.3442890.03146792         | 0.3281281          | 0.1206084                  |                   |             |          |            |
| 1.9314010.05278964         | 0.3197259                 | 0.01692432                 | 0                  | 0.04687545                 | 0.2135535         |             |          |            |
| 0.7766226                  | 0.1317432                 | 0.08689987                 | 0                  | 0.07380969                 | 1.1230920.0257188 |             |          |            |

|              |            |            |            |            |            |                      |
|--------------|------------|------------|------------|------------|------------|----------------------|
| 0.8158469    | 0.05134992 | 1.6313690  | 0.1344879  | 14.633810  | 0.1831943  | 0                    |
| 0.5975264    | 0.86425    | 0.1899717  | 0.1255220  | 0.0394310  | 0.04168628 | 1.75419 0            |
| 0.4177621    | 0.1978456  | 1.3119080  | 0.1445243  | 0.4370206  | 0          | 0.03603503           |
| 0.1717962    | 0.1173712  | 0.04344993 | 0.1135375  | 0.1225712  | 0          | 1.281449             |
| 1.1544070    | 0.2919117  | 0.07218519 | 0.4013138  | 0.5868562  | 0.2235182  |                      |
| 6.7221130    | 0.1711664  | 0.7630232  | 0.05620389 | 0.05205983 | 0.3326719  |                      |
| 0.3822082    | 0.03332443 | 0          | 0.41707    | 0.1913495  | 0.9541028  | 0 0.7010335          |
| 0.6512673    | 0.3373432  | 0          | 0.08201076 | 0.07371604 | 0.7663450  | 0.1986283            |
| 0.4867641    | 0.0344946  | 1.6907050  | 0          | 0.5178016  | 0          | 0.2198492            |
| 0.5239183    | 0.3081510  | 0.02636402 | 0.1655236  | 0.3613513  | 0.1377681  | 0.01437732           |
| 0.09505744   | 0.05662648 | 0.07352755 | 0          | 0.4471944  | 0.1491351  | 0.2263924            |
| 0            | 1.8522190  | 0.1221295  | 0.3929385  | 0.2057738  | 0.07437118 | 0.5577078            |
| 0.05023672   | 0.4013557  | 13.197270  | 0.1283748  | 0.07886201 | 0          | 0.5061581            |
| 0.1955536    | 0.06511229 | 0.2504874  | 0          | 0.1286184  | 0.09030362 | 0.2706159            |
| 0.6790536    | 0.1971120  | 0.6945704  | 0.1722539  | 0          | 0.04861905 | 0 0.1779052          |
| 0.03506565   | 0          | 0.4629911  | 0 0        | 0.5422552  | 0.1135375  | 0.1138474            |
| 0.1731762    | 0.3140346  | 0.1989406  | 0.02758726 | 0.1885285  | 0.1622547  |                      |
| 0.03265024   | 0.7442317  | 0.2240195  | 0.6178037  | 15.179270  | 0.04701634 |                      |
| 0.3558105    | 0.2681776  | 0.07038618 | 0.3821182  | 0          | 0.2879177  | 0.01114925           |
| 0.06658339   |            |            |            |            |            |                      |
| TCGA-XF-AAN2 | 1869       | 1          | 0.1701660  | 0.2079685  | 0.08816055 | 0.3597733 0          |
| 41.447920    | 0.08469478 | 0.1413461  | 0.3105475  | 0.6693355  | 0.1441287  |                      |
| 0.0581213    | 0.5212972  | 0.9462566  | 0.03941019 | 0.0301657  | 0.1726416  |                      |
| 0.5131277    | 0.1059010  | 0.04345056 | 0.1196902  | 0.09991529 | 2.68624927 | 0.80636              |
| 0.06715086   | 0.1568041  | 0.2238362  | 0.2618034  | 0          | 0.4924397  | 0.1610784            |
| 0.2431801    | 0.1044569  | 0.9789906  | 0.2816716  | 0.1814251  | 0.2106157  |                      |
| 0.1851940    | 0.04486046 | 0.3843904  | 0.08529646 | 0.1700861  | 0.5023064  | 0                    |
| 5.0640960    | 0.1542317  | 0.1831117  | 0.01509228 | 0.58757    | 1.4574044  | 0.731485             |
| 0.2586925    | 0.7493647  | 0.04298102 | 0          | 0.4329140  | 0.02166611 | 0.1595869            |
| 0            | 0.2456350  | 0.4885622  | 0 0        | 0.1231794  | 0.3643845  | 0.8462547            |
| 0.2355634    | 0.06467313 | 0.2214676  | 0.1287664  | 0.2313475  | 1.704599   |                      |
| 1.1937930    | 0.5055714  | 0.03781764 | 0.04058967 | 0.1105719  | 0 0        | 0.288157             |
| 0.2772448    | 0.5269418  | 0          | 0.1886226  | 0.1775972  | 0.4637324  | 0.2511532            |
| 0.4419330    | 0.1205272  | 0.0730313  | 0.09868934 | 0          | 0.04960538 | 0.4378604            |
| 0.06267414   | 0          | 0.03140845 | 1.7142220  | 0.05142334 | 0          | 0.1498729 0.05872364 |
| 0.4832352    | 0.4433540  | 0.1262666  | 0.1492241  | 0.2239816  | 0.3298639  |                      |
| 0.5252690    | 0.1920377  | 0.1430323  | 0          | 1.1682050  | 0.3251960  | 0.02582081 0 0       |
| 0.3258107    | 0.1535935  | 0.6029873  | 0          | 0.05754721 | 0.2502416  | 1.370768             |
| 0.07847644   | 1.3209140  | 0.5483987  | 1.3437110  | 0.1538874  | 0          | 0.2528744 0          |
| 0.3988354    | 0.3767298  | 0.2576291  | 0.06383477 | 0.3609505  | 0          | 1.144786             |
| 0.9634689    | 0 0 0      | 0 0        | 0.2939938  | 0.2666985  | 0 0        | 0.4481116            |
| 0.2686034    | 0.5303196  | 0.4330499  | 0.3116707  | 0.06419139 | 0.2057957  |                      |
| 1.2787060    | 0.1336077  | 0          | 0.3673617  | 1.3430170  | 0.1705067  | 0.0649779            |
| 0.2611422    | 1.2934630  | 0.2779901  | 0          | 1.0496180  | 0.1856595  | 0.04894679           |

|                    |                            |                    |                    |                   |                    |            |
|--------------------|----------------------------|--------------------|--------------------|-------------------|--------------------|------------|
| 0.3368480.4026236  | 0.07381322                 | 0.2104015          | 0.4585913          | 0.2328278         |                    |            |
| 0.4697891          | 0.1251208                  | 0.2124355          | 0.8466506          | 0.3030398         | 0                  | 0          |
| 0.2344951          | 0.3066795                  | 0.2510008          | 0.4671988          | 0.06449163        | 0.4441993          |            |
| 0.4079874          | 0.0268464                  | 0.1407791          | 0.1893999          | 0.1450790.1576407 |                    |            |
| 0.2632194          | 0.2447307                  | 0.08639292         | 0.06730695         | 0                 | 0.3573784          | 0          |
| 0.3973576          | 0.1275048                  | 0.3726570.3746823  | 1.2557660.2723169  | 0.4358135         |                    |            |
| 0.09580538         | 0.1080589                  | 0.03043777         | 0.1958567          | 0.1203168         | 0                  | 0.08128702 |
| 0.2983489          | 0.09933941                 | 0                  | 0                  | 0.06540944        | 0.8679692          | 1.9367290  |
| 0.2631357          | 0.06233413                 | 0.1752009          | 0                  | 0.1377559         | 0.1176477          | 0          |
| 2.2603790.04436393 | 0.06033391                 | 1.5626750.23096    | 0.1881672          | 0.1461579         |                    |            |
| 0.7060583          | 0                          | 0                  | 0.2876310.06188649 | 0.04981326        | 1.1007770.09765092 |            |
| 0.3366287          | 3.5107220.2869244          | 0.3101982          | 0.1022872          | 0.3221568         | 0                  |            |
| 0.04620747         | 0.4623847                  | 0.008505003        | 0.03386127         |                   |                    |            |
| TCGA-ZF-AA54       | 590                        | 1                  | 0.0513943          | 0.03664008        | 0.06212884         | 0.1426167  |
| 0.1051618          | 65.209270.1790593          | 0.1494149          | 0.5627577          | 0.3537724         |                    |            |
| 0.01692848         | 1.7271240.3214492          | 0.5398305          | 0.1388665          | 0.4190958         |                    |            |
| 0.1622195          | 0.08839435                 | 0.3358393          | 0.06124128         | 0.2811617         | 0.2816507          |            |
| 2.96154            | 47.213240.1340813          | 0.1473381          | 0.4732281          | 0.1229994         | 0.2168962          |            |
| 1.0411020.6810946  | 0.04284369                 | 0.07361326         | 1.3435240.2464146  | 0.1095897         |                    |            |
| 0.09895061         | 0.08700707                 | 0.0821970.1035752  | 0.1337942          | 0.1065455         |                    |            |
| 0.08849681         | 0.1188860                  | 0                  | 0.09678237         | 0.2446255         | 0.5520994          | 0.1786204  |
| 4.0390430.09115338 | 1.05619                    | 2.33231            | 0                  | 0.6991526         | 0                  | 0.06565507 |
| 0.7310205          | 0                          | 0                  | 0.1147671          | 0.03680663        | 0.0815595          | 0.1187891  |
| 0.1540743          | 0.2783087                  | 6.69562            | 0.01519223         | 0.1468927         | 0.1814895          |            |
| 0.3135309          | 1.46822                    | 0.8938753          | 0.2267288          | 0.1732314         | 0.04290676         |            |
| 0.09740327         | 0.5268679                  | 0.07748764         | 0.1269194          | 0.06512701        | 0.5879683          | 0          |
| 0.0332317          | 0.3039527                  | 0                  | 0.1769936          | 0.1245763         | 0.3397535          | 0          |
| 0.07948425         | 0.2678321                  | 0.06642037         | 0.4779820.1766718  | 0                 | 0.3393923          |            |
| 0.7878608          | 0.04831899                 | 1.0195060          | 0.5793752          | 0.7378525         | 0.6639395          |            |
| 0.1334746          | 0.1892912                  | 0.3314749          | 0.03874382         | 0.9716950         | 0                  | 0.1296746  |
| 1.0321490.2270315  | 0.2864667                  | 0                  | 0.0577016          | 0.5039912         | 0.09184263         |            |
| 3.86575            | 0.2124697                  | 0.09343221         | 0.1216646          | 0.1366722         | 1.3779890.02765211 |            |
| 2.9537520.2208398  | 0.7693930.4699418          | 0.9509471          | 0.05627577         | 0                 |                    |            |
| 0.3747584          | 0.1991178                  | 0.1951742          | 0.1349576          | 0.1695803         | 0.1768862          |            |
| 0.9860373          | 0.7845984                  | 0.09620742         | 0                  | 0.5530663         | 0                  | 0.1553883  |
| 0.09397437         | 0.09775603                 | 0.03874382         | 0.4528380          | 0.04671611        | 0.06103612         |            |
| 0.2196417          | 0                          | 1.5228060.5440812  | 0.0313855          | 0.1552228         | 0.2588885          |            |
| 0.7887135          | 0.03004003                 | 0.2594850.7361326  | 0.9571104          | 0.06042879        |                    |            |
| 0.1539263          | 0.08941978                 | 0.7866550.07165892 | 0.1744515          | 0.1983403         |                    |            |
| 0.07912826         | 2.2480810                  | 0.0864937          | 0.5386336          | 0.3108871         | 0.1241518          |            |
| 0.3527024          | 0.07485415                 | 0.8452610.8542374  | 0.04361288         | 0.3708759         |                    |            |
| 1.9004240.2161243  | 1.1792410.7363140.04544878 | 0.1309648          | 0.1936349          |                   |                    |            |
| 0.1324351          | 0.1559021                  | 0.04449153         | 0.2453775          | 0.2962485         | 0.2009551          |            |
| 0.2171814          | 0.06088314                 | 0.03839799         | 0                  | 0.1602701         | 0                  | 0.2920927  |



|              |            |            |            |            |             |            |
|--------------|------------|------------|------------|------------|-------------|------------|
| 0.68959      | 0.3501604  | 0.3696666  | 1.3717010  | 0.3038546  | 2.1352720   | 0.0405098  |
| 0.07615164   | 0.6721069  | 0.4600829  | 0.1695803  | 0          | 0.7661854   | 0.299207   |
| 0.2100205    | 0          | 0.05558896 | 0          | 0.4757499  | 0.9046159   | 0          |
| 0.04392834   | 0.06173412 | 0          | 0.08214452 | 0.1381819  | 0           | 0.02513438 |
| 0.7466918    | 0          | 0.02834583 | 0.5182373  | 0.1898901  | 0.05100226  | 0.1703477  |
| 0.3731821    | 0.1527822  | 0          | 0.2407067  | 0.1308386  | 0.03510459  | 0.3787094  |
| 0.8258031    | 0.2846763  | 5.8886220  | 0.1235681  | 0.5465101  | 0           | 0.07567718 |
| 0.08427537   | 0          | 0.4887802  | 0          | 0.05965711 |             |            |
| TCGA-GU-A766 | 480        | 0          | 0.05369353 | 0.1148377  | 0.04868121  | 0.1614133  |
| 0.1441997    | 63.993790  | 0.1403024  | 0.09756204 | 0.4654475  | 0           | 0.1061149  |
| 0.8852566    | 0.07196353 | 1.3684830  | 0.04352368 | 0.08328571 | 0.1271075   |            |
| 0.06296512   | 0.3508637  | 0.04798577 | 0.1542135  | 0.1103441  | 1.880685    |            |
| 30.918380    | 0.08033981 | 0.8802848  | 0.1235997  | 0.09637648 | 1.2746220   | 0.5438387  |
| 0.08894558   | 0.06714058 | 0.02883993 | 0.2560676  | 0.09117611 | 0.05724618  |            |
| 0.3101321    | 0.09544447 | 0.1783542  | 0.4806971  | 0.05925446 | 0.09391951  |            |
| 0.03467096   | 0.1863069  | 0.5592668  | 0          | 0.02527803 | 0.05833646  | 0.6488985  |
| 0.3848859    | 4.1495350  | 0.1071352  | 0.4482728  | 0.4390718  | 0.3577886   |            |
| 1.0458440    | 0.03442017 | 0.1316014  | 1.2337080  | 0.04758589 | 0.04521224  | 0.2697783  |
| 0.08651979   | 0.06584272 | 0.2362737  | 0.1609671  | 0.4049863  | 1.344112    |            |
| 0.04166369   | 0.0431618  | 0.2417512  | 0.09826719 | 0.1743073  | 0.8651979   |            |
| 0.4060662    | 0.06264736 | 0.2521478  | 0.06105647 | 0.1326950  | 0.09107347  | 0          |
| 0.1020609    | 0.2424759  | 0          | 0.1301939  | 0.05603834 | 0           | 0          |
| 0.04032702   | 0.03114005 | 0.02098606 | 0.1424358  | 0.2607446  | 0.4152950   |            |
| 0.7024067    | 0.8642626  | 0.05679072 | 0          | 0          | 0.6809565   | 0.6670919  |
| 0.1224074    | 0.03486146 | 0.02197328 | 0.4205121  | 0.1517891  | 0.3021326   |            |
| 0.05302049   | 0.07898073 | 0.06773792 | 1.6174870  | 0.6284928  | 0.009505296 |            |
| 0.04521224   | 0.3554133  | 0.07196353 | 0.2362635  | 0.1109875  | 0.1464181   | 0          |
| 0.1070898    | 0.6790033  | 0.01083344 | 1.0520090  | 1.2520940  | 0.1416247   |            |
| 1.2192830    | 0.08084089 | 0.05287321 | 0.8494671  | 0          | 0.06757338  | 0.2467416  |
| 0.04619989   | 0.03511874 | 1.1113230  | 0.1884590  | 0.02932874 | 0.9333834   | 0.1228023  |
| 0.08116996   | 0.3681693  | 0.0382985  | 0.09107347 | 0.3128040  | 0.9887977   |            |
| 0.1830226    | 0.1913     | 0.2409412  | 0.03544573 | 1.8182070  | 0.3896797   | 0          |
| 0.03040632   | 0.1014264  | 0.4325990  | 0.1176897  | 0.5800605  | 0.2523494   |            |
| 0.03571174   | 0.2367457  | 0.08771592 | 0.02335504 | 0.4691890  | 0.08422281  |            |
| 0.1025190    | 0.1418961  | 0.4092076  | 0.4788517  | 0.04075879 | 0.1258630   | 0.2110239  |
| 0.6292908    | 0.4215445  | 0.1036353  | 0.03105115 | 0.2281896  | 0.7530074   |            |
| 0.03417299   | 0.1453004  | 0.1942281  | 0          | 0.5543987  | 0.4409141   | 0.03561152 |
| 0.2252586    | 0.2574695  | 0.4892007  | 0.05552612 | 0.06972291 | 0.8972423   |            |
| 0.1160631    | 0.07267332 | 0.1451476  | 0.04770515 | 0.07787184 | 0           | 0.08970007 |
| 0            | 0.07629    | 0.1097081  | 0.5763521  | 0.03429613 | 0.3310323   | 0.4160515  |
| 0.1127776    | 1.3866090  | 0.03174156 | 0.05966882 | 0.7311209  | 0.07209983  |            |
| 0.06643754   | 0          | 0.3815287  | 0.3041442  | 0.02742702 | 0.1266143   | 0.08711375 |
| 0.07223664   | 0.1445455  | 0.6777258  | 0.2080257  | 0.08302881 | 0.1721009   |            |
| 0.1209298    | 0.07377657 | 0.01755397 | 0.06496367 | 0.0749384  | 0.009847054 | 0          |

|              |              |            |            |             |             |            |
|--------------|--------------|------------|------------|-------------|-------------|------------|
| 0.3900483    | 0.04899448   | 0.01110522 | 0.7106159  | 0.06376668  | 0.1079      | 0.12106    |
| 0.2645594    | 0.1915407    | 0.02324097 | 0.2680196  | 1.4694390   | 0.1100252   |            |
| 1.1151630    | 0.1617651    | 0.4832942  | 1.8818960  | 0.03960906  | 1.09196     | 0.1129635  |
| 0.1185941    | 0.08254274   | 0          | 0.4085173  | 0           | 0.1308846   |            |
| TCGA-FD-A6TD | 386          | 1          | 0          | 0.08072959  | 0.1095114   | 0.1536232  |
| 0.06951132   | 70.098650    | 0.1097360  | 0.2204323  | 0.1039295   | 0.02983901  | 0.5354628  |
| 0.1214149    | 0.9515327    | 0.06527282 | 0.1124139  | 0.07148409  | 0.3753565   |            |
| 0.1973225    | 0.02698675   | 0.1238975  | 0          | 0.8870863   | 32.4002     | 0.1112181  |
| 0.03246321   | 0.06951132   | 0          | 0          | 0.5243139   | 1.0504650   | 0.07551847 |
| 0.09731585   | 0.28802      | 0.06635795 | 0.09658415 | 0.3924346   | 0.2530491   | 0.1671745  |
| 0.09830528   | 0.08373761   | 0.1056389  | 0.03899724 | 0.5238863   | 1.930541    |            |
| 0.09579188   | 0.1137290    | 0.1499789  | 0.7906913  | 0.1180673   | 3.7517820   | 0.04016789 |
| 0.5429942    | 0.08008536   | 0.08048679 | 0.6721974  | 0           | 0.0497895   | 1.2389750  |
| 0            | 0.1685786    | 0          | 0.01960376 | 0.2778361   | 0.09052637  | 0.3153607  |
| 0.4876876    | 0.08033578   | 0.08900391 | 0.0239927  | 0.05526455  | 0.3136921   |            |
| 1.7609530    | 0.1427299    | 0.1056969  | 0.02520987 | 0.08584397  | 0.04975094  |            |
| 0.2048755    | 0.06711438   | 0.1147962  | 0.1090929  | 0.02309545  | 0.02928794  |            |
| 0.06303087   | 0.1920133    | 0.03899724 | 0.1646884  | 0           | 0.04535908  | 0.05253862 |
| 0.0944189    | 0.04005228   | 0.3039454  | 0.03892634 | 0.06047877  | 0.09753752  |            |
| 0.7869433    | 0.1490466    | 0          | 0.04654236 | 0           | 0.2501108   | 0.5507263  |
| 0.07842303   | 0.07414541   | 0.2921372  | 0.1365836  | 0.2990531   | 0           | 0          |
| 0.07619034   | 1.8842950    | 0.5554348  | 0.04276552 | 0           | 0.04441802  | 0.2023581  |
| 1.5263290    | 0.37451      | 0          | 0.03574205 | 0.09713923  | 0.7136495   | 0.0243705  |
| 1.4199360    | 0.04865792   | 1.3561710  | 0.09557806 | 0.03809517  | 0.06612969  | 0          |
| 0.6251806    | 0.1754876    | 0.0720050  | 0.0396472  | 0.03736385  | 0           | 0.0395009  |
| 0.5452105    | 0.08479004   | 0.09896527 | 0.1124842  | 0           | 0           | 0.41411    |
| 0.04307744   | 0.1024377    | 0.1732924  | 0.2780453  | 0.04117209  | 0.3227561   | 0.07743033 |
| 0            | 0.9586337    | 0.5581826  | 0.02766083 | 0.03420046  | 0.4563301   | 0.2780453  |
| 0.2029753    | 0.1479763    | 0.08109654 | 0.6025184  | 0           | 0.08632857  | 0.1050772  |
| 0.3000846    | 0.06315483   | 0.03843714 | 0.1140015  | 0.2510559   | 0.4039526   | 0          |
| 0.05444935   | 0.2373557    | 0.3044363  | 0.3647272  | 0.03885569  | 0.04268703  |            |
| 0.5508874    | 0.4705382    | 0.03843714 | 0.03268624 | 1.6748920   | 0.1142855   |            |
| 0.3117886    | 0.1952072    | 0.06008275 | 0.2336604  | 0.2327118   | 0.1500665   |            |
| 0.1249095    | 0.1568461    | 0.4865792  | 0.09790924 | 0.0272472   | 0.1407408   | 0          |
| 0.04976636   | 0            | 0.2421431  | 0          | 0.1716191   | 0.2467952   | 0.4512107  |
| 0.2700296    | 0.1396271    | 1.0919230  | 0.0704723  | 0.5155806   | 0.02380154  |            |
| 0.02237146   | 0.04096002   | 0.4460310  | 0.03736385 | 0           | 0.2776765   | 0.1710478  |
| 0.06169881   | 0            | 0.09798392 | 0.4875025  | 0.1540251   | 0.6783711   | 0          |
| 0.02334731   | 0.1161455    | 0.02720392 | 0          | 0.0329073   | 0.04871328  | 0          |
| 0            | 0.009406628  | 0.4387190  | 0.02755404 | 0.0249819   | 2.2265870   | 0.1912629  |
| 0.07641429   | 0.1117260    | 0.4541881  | 0          | 0           | 0.2847155   | 1.5374860  |
| 0.1237543    | 0.446816     | 0.3032505  | 0.5017848  | 3.3153460   | 0.07425255  | 0.3371573  |
| 0            | 0            | 0          | 0.05570551 | 0           | 0.1723097   | 0.03169428 |
| 0.09463918   | TCGA-FD-A3B4 | 510        | 1          | 0.109954974 | 0.192409897 | 0.03625114 |
| 0.277381522  |              |            |            |             |             |            |

|             |              |             |             |             |             |
|-------------|--------------|-------------|-------------|-------------|-------------|
| 0.460201161 | 24.139735985 | 0.034826034 | 0.167097131 | 0.510781829 | 0.550454204 |
| 0.128407348 | 1.065504389  | 0.455503456 | 0.537322454 | 0.237677063 | 0.23744746  |
| 0.047326196 | 0            | 0.174183665 | 0.041688811 | 0.032810638 | 0.123253876 |
| 1.190406561 | 48.823097332 | 0.220896557 | 0.752231769 | 0.138060348 | 0.10765212  |
| 0.822609576 | 0.593002068  | 0.198703679 | 0.224987234 | 0.107380271 | 0.78392413  |
| 0.407373336 | 0.03197187   | 0.202076111 | 0.172608401 | 0.125435361 | 0.158059251 |
| 0.095037711 | 0.101022229  | 0.077454622 | 0.231226685 | 1.077066547 | 0.095128831 |
| 0.112941799 | 0.018617595  | 0.362408414 | 1.328830853 | 4.077624499 | 0.292525616 |
| 0.770336726 | 0.353471216  | 0           | 0.289269301 | 0           | 0.163925331 |
| 0.524970213 | 0.035435489  | 0.033667923 | 0.066964704 | 0.064428163 | 0.191796524 |
| 0.106633032 | 0.119866349  | 0.417570415 | 0.226012233 | 0.044322063 | 0.251771429 |
| 0.465942931 | 0.343927311  | 1.03840262  | 0.245440619 | 0.170090349 | 0.108852847 |
| 0.154384823 | 0.250066004  | 0.197626277 | 0.090425491 | 0.16292179  | 0.266003674 |
| 0.216675604 | 0            | 0.542924051 | 0.097369353 | 0.190684248 | 0.129091036 |
| 0.181720459 | 0.09912025   | 0           | 0.150727644 | 0.093765352 | 0.101987306 |
| 0.324788546 | 0.25771265   | 0.160160404 | 1.373293378 | 0.245175278 | 0.143316085 |
| 0           | 0.061626938  | 1.110754694 | 0.894166555 | 0.091152384 | 0.181720459 |
| 0.208624526 | 0.257880105  | 0.090425491 | 1.034941278 | 0.217153417 | 0           |
| 0.151325933 | 2.014642898  | 0.165586399 | 0.401156484 | 0.03539125  | 0.033667923 |
| 0.088221135 | 0.321531851  | 0.843594719 | 0.495890231 | 0.054516138 | 0.094652392 |
| 0.192933699 | 0.936657381  | 0.088739985 | 1.044524375 | 0.161070406 | 1.274578844 |
| 0.274203192 | 1.967237134  | 0.158707211 | 0           | 0.788756899 | 0.038727311 |
| 0.222464956 | 0.131242553  | 0.593683592 | 0.206420327 | 0.235364874 | 0.607465533 |
| 0           | 0.04368011   | 0.02482346  | 0           | 0.090666497 | 0.137081197 |
| 0.085558526 | 0.180850983  | 0.545829957 | 0.699505765 | 0.463387169 | 0.106840672 |
| 0.230683114 | 0.079185451  | 0.59235445  | 0.910223945 | 0.091564572 | 0.158497397 |
| 0.302114297 | 0.782341974  | 0.233704794 | 0.449762417 | 0.483211219 | 0.638237708 |
| 0.176295967 | 0.269440357  | 0           | 0.506955286 | 0.146341254 | 0.254473892 |
| 0.251583169 | 0.461700188  | 0.496669932 | 0.030351597 | 0.245128513 | 0.754280928 |
| 0.196513912 | 0.265615253  | 0.154346959 | 0.105336601 | 0.091179037 | 0.498433258 |
| 0.050894778 | 0.238039929  | 0.916019454 | 0.4539778   | 0.137613551 | 0.576328808 |
| 0.013259304 | 0.320573527  | 0.81484507  | 1.114948421 | 0.330786366 | 0.129800328 |
| 0.441452225 | 0.15124904   | 0.117253926 | 0.324258488 | 0.1065729   | 0.122566267 |
| 0.02495457  | 0.187029916  | 0.093559048 | 0           | 0.408478264 | 0.49137212  |
| 0.357547281 | 0.400575098  | 0.671273388 | 0.055987607 | 1.954178705 | 0.047273582 |
| 0.059244287 | 0.667511795  | 0.080535203 | 0.247368163 | 0           | 0.480481212 |
| 0.292543321 | 0.081695653  | 0.031428372 | 0.064870461 | 0.134480036 | 0.600505496 |
| 0.944534822 | 0.077454622  | 0.386428456 | 0.076894371 | 0.180104139 | 0.16481623  |
| 0.056644496 | 0.258005839  | 0.111607841 | 0.029330979 | 0           | 1.85891092  |
| 0.164179874 | 0.074426932  | 0.98274424  | 0.087055362 | 0.09820459  | 0.50853279  |
| 0.207376675 | 0.267437656  | 0.01730671  | 0.280896709 | 0.890658621 | 0.040965884 |
| 1.32225965  | 0.020076765  | 0.968939164 | 3.706058332 | 0.147477181 | 0.398599431 |
| 0.126179784 | 0.397407358  | 0.030733295 | 0.019000262 | 0.323221097 | 0.003497211 |
| 0.013923571 | TCGA-DK-A1AB | 508         | 1           | 0.1410504   | 0.1206694   |
| 0.1364089   | 0.1739591    | 0.6349509   | 34.800290   | 0.2323705   | 0.20593     |
| 0.64728     | 0.08362767   | 1.585013    | 0.2268539   | 0.1220102   | 0.3557080   |
| 0.3200552   | 0.08904152   | 0.3219913   |             |             |             |

|              |            |             |            |            |            |            |
|--------------|------------|-------------|------------|------------|------------|------------|
| 1.003632     | 0.08964012 | 0.1388955   | 0          | 0.4611109  | 27.9165    | 0.07792579 |
| 0.4549117    | 0.4329210  | 0.2025413   | 1.131006   | 0.449001   | 0.1869248  | 0.0235167  |
| 0.7273073    | 0.7374541  | 0.3719535   | 0.08020432 | 0.3258811  | 0.06686087 |            |
| 0.09023508   | 0.07871808 | 0.1192053   | 0.05117203 | 0.09715095 | 0.1087599  |            |
| 0.9997099    | 0.05965981 | 0.08853896  | 0.1050838  | 0.2651641  | 0.3431536  |            |
| 2.7553150    | 0.2251514  | 2.2947950   | 0.6151581  | 0.2005108  | 0.1465271  | 0.409905   |
| 0.1106275    | 0.1851940  | 0.0950164   | 0.04199675 | 0.04040596 | 0.5765527  |            |
| 0.05015598   | 0.08457062 | 0.2400551   | 0.2126145  | 0.02084735 | 0.2267682  |            |
| 0.2590087    | 0.3097721  | 1.3431650   | 0.8369807  | 0.03555725 | 0.1097145  |            |
| 0.08635481   | 0.2245496  | 0.4647781   | 0.1275978  | 0.1950633  | 0.1072437  |            |
| 0.2038314    | 0          | 0.2371294   | 0.09159743 | 0.05979358 | 0.04857548 | 0.2735173  |
| 0.6060895    | 0.1412497  | 0.09271062  | 0.07350589 | 0.1170488  | 0.3420669  |            |
| 0.6788202    | 0.3389992  | 0.6722669   | 1.0955480  | 0.4486649  | 0.01929663 |            |
| 0.05797377   | 1.1584880  | 0.4361578   | 0.06431174 | 0.4884237  | 0.2462840  | 0.190609   |
| 0.1488641    | 0.7704070  | 0.09285493  | 0.0829915  | 0.09490369 | 0.3507164  |            |
| 0.06230826   | 0.06289608 | 0.009987991 | 0.0950164  | 0.1106553  | 0.05041198 |            |
| 1.9967       | 0.3109963  | 0           | 0          | 0.1524573  | 0.9357171  | 0.06071243 |
| 0            | 0.6201846  | 0.2381066   | 1.9692520  | 0.1544475  | 0.0370388  | 0.844852   |
| 0.3278845    | 0.05730218 | 0.02469253  | 0.4886795  | 0.0970920  | 0.5658326  |            |
| 0.4058164    | 0          | 0.4109081   | 0.02335196 | 0.1147008  | 0.2274451  | 0.1547462  |
| 0.3219469    | 0.2551956  | 0.42844     | 0.2770695  | 0.2564225  | 0.1340097  |            |
| 0.04822412   | 0          | 0.9552694   | 1.0779170  | 0.08613674 | 0.3195040  | 0.5447269  |
| 0.4329210    | 0.2583250  | 0.6199897   | 0.5555820  | 0.8505721  | 0.06633815 | 0.06912771 |
| 0            | 0          | 0           | 0          | 0          | 0          | 0          |
| 0.3737893    | 0.07866648 | 0.09575561  | 0.1940691  | 0.2866586  | 0.6109904  |            |
| 0.05710479   | 0.07460511 | 0.4730454   | 0.1611642  | 0.09086179 | 0.1451975  |            |
| 0.09425861   | 0.3820845  | 0.8205519   | 0.3112057  | 0.2850008  | 0.5442436  |            |
| 0.2372592    | 0.64728    | 0.4304460   | 0.01247331 | 0.3138436  | 0.3317388  | 1.007317   |
| 0.1789272    | 0.2442119  | 0.2244776   | 0.6504375  | 0.08060623 | 0.2033579  |            |
| 0.1336739    | 0.07934672 | 0.04695059  | 0.1759430  | 0.0440065  | 0.3473779  |            |
| 0.07685284   | 0.6147963  | 0.6006292   | 0.2608821  | 0.06866    | 0.04389061 | 0.3371623  |
| 0.09635441   | 0.1532641  | 0.04003     | 0.6565969  | 0          | 0          | 0.9885020  |
| 0.1152793    | 0.02956534 | 0.03051251  | 0.1265082  | 1.2044270  | 0.9045146  |            |
| 0.2185896    | 0.08724516 | 0.04822412  | 0.05082834 | 0          | 0.06968259 | 0.03033895 |
| 0            | 0          | 0.3339351   | 0.4098556  | 0.1029650  | 0.05445611 | 0.4266870  |
| 0.1063806    | 0.3500928  | 0.3804131   | 0.1006337  | 0          | 0.1216920  | 0.5745336  |
| 0.03853748   | 0.3989797  | 0.01888664  | 1.0938027  | 0.4571740  | 0.1603159  | 0.2249826  |
| 0            | 0.04153884 | 0.01156459  | 0.05362186 | 0.1699164  | 0.0197394  | 0.0851383  |
| TCGA-BT-A20X | 251        | 1           | 0.05394532 | 0.04615051 | 0.0391276  | 0.09979708 |
| 0.04967173   | 70.785510  | 0.4626523   | 0.4134836  | 0.2227994  | 0.01066125 |            |
| 0.4084291    | 0.1446020  | 0.2799797   | 0.03498222 | 0.1128434  | 0.05108144 |            |
| 0.1518249    | 0.6815175  | 0.03214053  | 0.01770705 | 0.1330338  | 0.9849805  |            |
| 35.1272      | 0.1887526  | 0.3827623   | 0.1490152  | 0.03873137 | 0.06829863 |            |
| 0.6244446    | 0.03574508 | 0.02698217  | 0.04636028 | 0.1143415  | 0.08190447 |            |
| 0.02300585   | 0.03115864 | 0.2520591   | 0.03982013 | 1.2042420  | 0.1257811  |            |

|              |             |             |            |            |             |             |           |
|--------------|-------------|-------------|------------|------------|-------------|-------------|-----------|
| 0.07548796   | 0           | 0.1996593   | 0.5580143  | 0          | 0.06095176  | 0.006698289 |           |
| 0.3477021    | 0.08436889  | 5.6776090   | 0.1148135  | 1.3026230  | 0.2289111   | 1.207807    |           |
| 0.3122223    | 0.2489874   | 0.02500133  | 0.3187269  | 0          | 0           | 0.1686492   | 0         |
| 0.02490409   | 0.05754709  | 0.03234438  | 0.1752737  | 1.7076210  | 0.004783894 |             |           |
| 0.3700412    | 0.01714482  | 0.1026771   | 0.3082194  | 0.2318014  | 0.04079705  |             |           |
| 0.0167843    | 0.009007296 | 0.1472227   | 0.2725597  | 0.1952012  | 0.04795891  | 0           |           |
| 0.1364232    | 0.01650366  | 0.2511446   | 0.3678340  | 0.0686049  | 0           | 0.2353676   | 0         |
| 0            | 0.01251443  | 0.1012055   | 0.04623352 | 0.1714695  | 0.2503455   | 0           | 0.19748   |
| 0.3142475    | 0.1622956   | 0           | 0          | 0          | 0.1429803   | 0.09838516  | 0.3362394 |
| 0.1103816    | 0.24852     | 0.07320044  | 0.3788297  | 0.06392295 | 0           | 0           | 0.8976588 |
| 0.1072352    | 0.4329875   | 0.003819948 | 0.07267882 | 0.03174044 | 0.0289204   |             |           |
| 2.5003120    | 0.04460319  | 0.05884189  | 0.02554072 | 0.05553137 | 0.8409918   |             |           |
| 0.06095176   | 1.66856     | 0.03477021  | 0.4913266  | 0.1138310  | 0.05444446  | 0.04725527  |           |
| 0            | 1.0452140   | 0.04180025  | 0.03716099 | 0          | 0.1067986   | 0.1856662   | 0.3387209 |
| 1.14029      | 0.03029484  | 0           | 0.05358631 | 0.03290084 | 0           | 0.4734667   | 0         |
| 0.1464009    | 0.4165261   | 0           | 0.02942095 | 0.1921971  | 0.05533053  | 0           |           |
| 0.3196784    | 0.2998208   | 0.1185961   | 0.1221956  | 0.1630433  | 0.3477021   |             |           |
| 0.07567465   | 0.07209657  | 0.1448759   | 0.3157370  | 0.03805695 | 0.07931454  |             |           |
| 0.1501732    | 0.1330981   | 0.1805179   | 0.02746659 | 0.1683584  | 0.01993341  |             |           |
| 0.2474214    | 0           | 0.03890868  | 0.1696108  | 0.1414046  | 0.2085028   | 0.08329706  |           |
| 0.02495741   | 0.1476209   | 0.6724788   | 0.02746659 | 1.2379260  | 0.2601852   |             |           |
| 0.1905556    | 0.2970659   | 0.3770057   | 0.02862281 | 0.1850754  | 0.6023477   |             |           |
| 0.2144705    | 0.1160359   | 1.3169380   | 0.2446793  | 0.1399289  | 0.07788173  |             |           |
| 0.1448225    | 0           | 0.07396954  | 0          | 0.04325794 | 0           | 0.06131821  | 0         |
| 0.3859180    | 0.3991015   | 0.8081382   | 0.07050181 | 2.0447650  | 0.05102466  | 0.1278904   |           |
| 0.1238321    | 0.08692553  | 0.05339928  | 0          | 0.2570485  | 0.4023344   | 0.1543116   |           |
| 0.06784431   | 0.07001782  | 0.05806031  | 0.18344    | 0.5913662  | 0           | 0.01668363  | 0         |
| 0.1166370    | 0.05929803  | 0.05643612  | 0.06961953 | 0          | 0.01582917  | 0.5579122   |           |
| 0.4389027    | 0.1575176   | 0.02677753  | 0.3263764  | 0.1281314  | 0.01284811  |             |           |
| 0.3393101    | 0.05595791  | 0.03848778  | 0          | 0.1436141  | 0.1098664   | 0           |           |
| 2.6889430    | 0.3033775   | 0.5378517   | 2.4875510  | 0.03183585 | 0.1720910   | 0.09079462  | 0         |
| 0.0464407    | 0.0205079   | 0.08208661  | 0.1434389  | 0.06762772 |             |             |           |
| TCGA-GV-A3JW | 649         | 0           | 0.3950106  | 0.5218093  | 0.1685347   | 0.6125461   | 0         |
| 44.670750    | 0.2279883   | 0.5936672   | 1.2795550  | 0.2755278  | 0.2268481   |             |           |
| 0.5294188    | 2.5626640   | 0.3076368   | 0.2471449  | 0.08250885 | 0.3487771   |             |           |
| 0.2783670    | 0.1522831   | 0.7436301   | 0.2387575  | 11.1027443 | 0.601680    | 0.06953424  |           |
| 0.02497993   | 0.3209273   | 0.2919490   | 1.7651     | 0.2309477  | 0.1162206   |             |           |
| 0.1497661    | 1.6498890   | 0.8076986   | 0.1362533  | 0.4697347  | 0.5369478   |             |           |
| 0.2572764    | 0.04322536  | 0.1814694   | 0.2077347  | 0.5101321  | 0           | 24.6196     |           |
| 0.5528277    | 0.2625381   | 0.07212901  | 0.7020284  | 0.6662387  | 4.00033     |             |           |
| 0.2781771    | 2.1189730   | 0.1335196   | 0.1238667  | 1.3965631  | 0.6086990   | 0.08180182  |           |
| 5.7583660    | 0.2347876   | 0.3632122   | 0          | 0.01676088 | 0.5948954   | 0.3134638   |           |
| 0.3774791    | 0.4503216   | 0           | 0.6350624  | 0.1538501  | 0.9355546   | 4.375034    |           |
| 2.9240040    | 0.3514510   | 0.0271107   | 0.04849652 | 0.2245890  | 0.02552171  | 0.210198    |           |

|              |             |            |            |            |             |            |            |
|--------------|-------------|------------|------------|------------|-------------|------------|------------|
| 0.4992202    | 0.1325008   | 0.4616992  | 0.03554318 | 0.2253662  | 0.09700255  |            |            |
| 0.2955025    | 0.2400622   | 1.1827680  | 0.03490311 | 0.2762556  | 0.4722502   |            |            |
| 0.01896591   | 0.5334134   | 0          | 0          | 0.1476054  | 2.9030330   | 0.01365346 | 0.0238412  |
| 0            | 0.05613038  | 3.9646011  | 0.0064660  | 0.2413812  | 0.1521433   | 0.6529761  |            |
| 0.1576485    | 1.7467950   | 0.1376680  | 0.03417898 | 0.1758818  | 2.7248790   | 0.2309477  |            |
| 0.7382336    | 0.004113425 | 0.03913127 | 1.3671590  | 0.4982765  | 0.06816215  |            |            |
| 1.7771070    | 0.08250885  | 0.2451706  | 2.6204680  | 0.1781509  | 0.3763465   |            |            |
| 0.3369736    | 0.4524494   | 0          | 0.2051955  | 0.9731902  | 0.0915237   | 1.642888   |            |
| 0.8102098    | 0.1754546   | 0.0610158  | 0.2587581  | 0.03998608 | 1.306999    |            |            |
| 1.8520760    | 0           | 0.05770321 | 0.07085706 | 1.8968241  | 0.0834140   | 0.3646216  |            |
| 0.07882424   | 0.9495837   | 0.0855806  | 2.3760960  | 0.1241779  | 0.1787443   | 0          |            |
| 0.6884768    | 0.8676735   | 2.6392880  | 0.5789678  | 0.7900625  | 1.6046361   | 0.089909   |            |
| 0.1707982    | 0.4368177   | 3.8017540  | 0.6147114  | 0.1328570  | 0.1212829   | 1.242139   |            |
| 0.14579      | 0.08873034  | 0.07602608 | 0.1180566  | 0.08881006 | 0.3174912   |            |            |
| 0.08379586   | 0.9132077   | 0.3689580  | 0.1683911  | 1.9733240  | 0.3822197   | 4.065579   |            |
| 0.1448287    | 0.02957678  | 0.2766671  | 0.05603492 | 0.9380365  | 0.07997217  |            |            |
| 1.62794      | 0.01541091  | 1.6550080  | 0.3740534  | 0.6671821  | 0.3075709   | 0.3620718  |            |
| 0.5546891    | 1.2305470   | 0.6394720  | 0.5068339  | 0.2477333  | 0.1302011   | 0          |            |
| 7.9654090    | 0.2718526   | 0          | 0.1899051  | 0.5541022  | 0.2968336   | 0.6088316  |            |
| 0.4801243    | 0.3253643   | 0.3325430  | 0.1739917  | 0.2237884  | 0.6036928   | 0          |            |
| 0.4600144    | 0           | 0.04127672 | 0.4551811  | 0.02373814 | 0.07305661  | 0.0753971  |            |
| 0            | 0.9152372   | 1.1543550  | 0.1800466  | 0.1976193  | 0.08937215  | 0.08373198 | 0          |
| 0.1114153    | 0.2249047   | 0.5837338  | 0          | 0.6152516  | 1.7892130   | 0.2332264  |            |
| 0.2306782    | 0           | 0.2483558  | 0.1763988  | 0.3008998  | 1.7354020   | 0.3730023  |            |
| 0.0201151    | 0.6787312   | 0          | 0.7142023  | 0.9320367  | 0.04666931  | 2.445399   |            |
| 5.2690180    | 0.3123445   | 0.01853123 | 0          | 0.2052868  | 0           | 0.1766677  | 1.425339   |
| 0.1991707    | 0.02427446  |            |            |            |             |            |            |
| TCGA-UY-A9PB | 899         | 0          | 0.07519834 | 0          | 0           | 0.1391145  | 0.05770089 |
| 0.1964949    | 0.1776276   | 0.2744691  | 0          | 0.03715374 | 1.7417280   | 0.05039284 |            |
| 0.8014766    | 0.1727068   | 0.4599047  | 0.08900771 | 0.1499116  | 0.2456941   |            |            |
| 0.01120076   | 0.1542697   | 0.1545384  | 0.8345164  | 0.98283    | 0.1644475   | 0.5456868  |            |
| 0.2596540    | 0.2380162   | 0.6528443  | 1.5571150  | 0.1410466  | 0           | 0.7172505  |            |
| 0.1051590    | 0.08017386  | 0.3800502  | 0.08593134 | 0.1595861  | 0.3934409   |            |            |
| 0.08724219   | 0.08769016  | 0.04855703 | 1.1306740  | 0.8912946  | 0.1192743   |            |            |
| 0.1062064    | 0.1517301   | 0.4543945  | 0.14701    | 4.0496910  | 0.1000293   | 0.1448794  |            |
| 0.3157721    | 0           | 0.4324396  | 0          | 0.09215459 | 0.9873263   | 0.2665781  | 0          |
| 0.3358464    | 0.04039062  | 0.0461067  | 0.1303560  | 0.1308894  | 0.4857915   |            |            |
| 0.05001465   | 0.09067282  | 0.05974855 | 0.1651491  | 0.2441191  | 0.519308    |            |            |
| 0.1421750    | 0.2193457   | 0.02354237 | 0          | 0.1238938  | 0.08503289  | 0.417834   |            |
| 0.07146866   | 0.4414669   | 0.5751415  | 0.1823380  | 0.09156264 | 0.5977087   | 0          |            |
| 0.2050601    | 0.2796274   | 0          | 0.04361196 | 0          | 0.007672416 | 0.2987799  | 0          |
| 0.07530455   | 0.2671853   | 0.5187466  | 0.2430266  | 0          | 0           | 0.4541365  |            |
| 2.3668150    | 0.6857314   | 0.09764766 | 0.09232142 | 0.1558936  | 0.08503289  |            |            |
| 0.7278005    | 0.03712787  | 0          | 0.04743383 | 1.7259480  | 0.2514888   | 0.03993679 |            |

|              |             |            |            |            |            |            |            |
|--------------|-------------|------------|------------|------------|------------|------------|------------|
| 0            | 0.16592     | 0.2015713  | 1.8665560  | 0.3108782  | 0          | 0.1780154  | 0.1306281  |
| 0.8418256    | 0.01517234  | 1.5715730  | 0.06058593 | 2.1137310  | 0.3570242  | 0.5692059  |            |
| 0.3190703    | 0           | 0.5874999  | 0          | 0.1942553  | 0.04936631 | 0.1860929  |            |
| 0.2588137    | 0.1967366   | 0.5795176  | 0.1055755  | 0          | 0.2334309  | 0          |            |
| 0.2841984    | 0.7734374   | 0.05363744 | 0          | 0.4250080  | 0.4101202  | 0          |            |
| 0.3856464    | 0           | 1.5915110  | 0.2285621  | 0          | 0          | 0.1420487  | 0.7789620  |
| 0.7537552    | 0.1514648   | 0.5001465  | 0.06631296 | 0.07677941 | 0.09812691 |            |            |
| 0.4123006    | 0.1179549   | 0.2871577  | 0.1892638  | 0.1215666  | 1.0299060  |            |            |
| 0.08135649   | 0.2955411   | 0.3032527  | 0.04541365 | 0          | 0.05315133 | 0.7327     |            |
| 0.7616517    | 0           | 0.08139789 | 0.9067282  | 0.1423015  | 0.3882205  | 0.7423195  |            |
| 0            | 0.3084664   | 0.5537613  | 0.4359922  | 0.01555298 | 0.2929432  | 0.580512   |            |
| 0.08127381   | 0.08481645  | 0.1331839  | 0.1336231  | 0.1511972  | 0          | 0.1005007  |            |
| 0            | 0.2136899   | 0.3072946  | 0.8071870  | 0.5283530  | 0.1738553  | 0.6797984  |            |
| 0.08774789   | 1.4925810   | 0.1333631  | 0.1392780  | 0.2550048  | 0          | 0.09304646 | 0          |
| 0.4203958    | 0.2484749   | 0.03841183 | 0          | 0.1830056  | 0.1011682  | 0.1491644  |            |
| 0.5108640    | 0.2185066   | 0.2034947  | 0.0482058  | 0.06774539 | 0.3099745  |            |            |
| 0.06555871   | 0.03032743  | 0          | 0.1103272  | 0.05856285 | 0.6008933  | 0          |            |
| 0.03110596   | 0.9952249   | 0.2232647  | 0.08395279 | 0.2521450  | 0.3315163  |            |            |
| 0.3688502    | 0           | 0.2710964  | 2.1058230  | 0.07704569 | 1.2065390  | 0.1510358  |            |
| 0.7809905    | 4.3662290   | 0.03698193 | 0.4198080  | 0.07910329 | 0          | 0.1849631  | 0          |
| 0.4112204    | 0.006577303 | 0.1702119  |            |            |            |            |            |
| TCGA-FD-A6TI | 294         | 1          | 0.01089594 | 0.1398231  | 0          | 0.1511786  | 0.1839339  |
| 20.520240    | 0.2657325   | 0.2850929  | 0.1789627  | 0.5250153  | 0.06460118 |            |            |
| 1.3242620    | 0.1168276   | 0.2827533  | 0.07654567 | 0.16225    | 0.02579374 | 0.01022193 |            |
| 0.1186670    | 0.1038686   | 0.1251773  | 0.08956782 | 2.1076633  | 1.547680   | 0.06521294 |            |
| 0.2342752    | 0.3009828   | 0.1173452  | 0.4828265  | 0.5990991  | 0.2165951  | 0          |            |
| 0.04681954   | 0.3926123   | 0.1393109  | 0.06970127 | 0.5034770  | 0.1272781  |            |            |
| 0.7680989    | 0.06587597  | 0.07522968 | 0.05929449 | 0          | 0.07561394 | 1.3305860  |            |
| 0.1436297    | 0.03382323  | 0.2194666  | 0.5112281  | 3.6870390  | 0.02898771 |            |            |
| 0.8956782    | 0.1541192   | 0          | 0.3314853  | 0          | 0.07380479 | 0.9298882  | 0          |
| 0.2201964    | 0.02433142  | 0.02340977 | 0.08331202 | 0.0697406  | 0.0653296  |            |            |
| 0.3793073    | 0.4575304   | 0.00966257 | 0.07007006 | 0.09234486 | 0.1435767  |            |            |
| 0.4810579    | 0.4347529   | 0.0824024  | 0.08475288 | 0.06822394 | 0.1115109  |            |            |
| 0.08377471   | 0.2217768   | 0.3228934  | 0.2071106  | 0.2361852  | 0          | 0.02113605 |            |
| 0.2274355    | 0           | 0          | 0.07923307 | 0.2701127  | 0.16367    | 0.03159601 | 0.03406935 |
| 0.1067235    | 0.2462836   | 0          | 0.1745813  | 0.6123868  | 0.9687849  | 0.02817088 |            |
| 0.02235955   | 0.03358793  | 0.6053839  | 0.7219836  | 0.2732395  | 0.1414876  |            |            |
| 0.1917372    | 0.2710605   | 0.02464186 | 0.5395395  | 0.1506311  | 0          | 0.08247571 |            |
| 3.4933490    | 0.1443967   | 0.2186384  | 0.1080181  | 0.07339881 | 0.1602744  |            |            |
| 0.2044483    | 0.1721088   | 0.2702702  | 0.1782744  | 0.02579374 | 0.1289874  |            |            |
| 1.4546910    | 0.01758731  | 0.1252431  | 0.03511466 | 0.6228088  | 0.02299174 |            |            |
| 0.5498381    | 0.05368882  | 0          | 1.2428460  | 0.2110717  | 0.08083195 | 0.05722389 |            |
| 0.0808924    | 0.07500218  | 0.2850636  | 1.3243240  | 0.1223798  | 0          | 0.08117574 |            |
| 0.2990410    | 0.2635471   | 0.4482722  | 0.03108742 | 0.02464186 | 0.2311693  |            |            |

|              |            |             |             |            |             |             |
|--------------|------------|-------------|-------------|------------|-------------|-------------|
| 0.4815724    | 0.5645356  | 0.03882022  | 0.1396966   | 0          | 0.6918112   | 0.5920645   |
| 0.0998091    | 0.1480874  | 0.5763045   | 0.1003276   | 0.3311720  | 0.08737295  |             |
| 0.3511466    | 0.4058279  | 0           | 0.1068003   | 0.09478803 | 0.1269491   | 0           |
| 0.05547738   | 0.1974498  | 0.2617014   | 0.2498725   | 0.03308447 | 0.0943059   |             |
| 0.5823894    | 0.2801183  | 0.1316052   | 0.3925704   | 0.0168031  | 0.6505452   |             |
| 0.1697852    | 0.02773869 | 0.04717694  | 0.4729729   | 0.3299028  | 0.07500218  |             |
| 1.39351      | 0          | 0.1889404   | 0.3097554   | 0.1082975  | 0.09915691  | 0.08489258  |
| 1.2485210    | 0.3532877  | 0.04424246  | 0.08531671  | 0          | 0.1134901   | 0           |
| 0.1019832    | 0.03096282 | 0           | 0.2937247   | 0.5010957  | 0.1007638   | 0.6754295   |
| 0.1424005    | 0.6697365  | 0.008588354 | 0           | 1.9691081  | 0.1412260   | 0.1617848   |
| 0.2439545    | 0.1024717  | 0.08743596  | 0.0222629   | 0.1370328  | 0           | 0.05863548  |
| 0.3952153    | 0.1766439  | 0.04221434  | 0.4043738   | 0.02793933 | 0.03926417  | 0           |
| 0.0522456    | 0.05273191 | 0.1216571   | 0.06394392  | 0.2443832  | 1.013144    |             |
| 0.07953899   | 0.01802853 | 0.3708108   | 0.1897878   | 0.1038031  | 0.2393661   |             |
| 0.1695368    | 0.1749107  | 0.05659505  | 0.20144     | 0.2219095  | 0.04465448  |             |
| 2.0939880    | 0.1094224  | 1.0260064   | 0.4538520   | 0.03929594 | 0.03475917  | 0.09169406  |
| 0.09626448   | 0.05360086 | 0.02071106  | 0.0414499   | 0.01143631 | 0.1973044   |             |
| TCGA-XF-AAML | 232        | 1           | 0.1314304   | 0.04684976 | 0.07944089  | 0.2228802   |
|              | 0          |             |             |            |             |             |
| 22.794050    | 0.2547320  | 0.1998802   | 0           | 0          | 0.02618636  | 0.2348687   |
|              |            |             |             |            |             |             |
| 0.2959355    | 0.1747422  | 0.05185541  | 0.0513751   | 0          | 0.05220401  | 0.1797534   |
|              |            |             |             |            |             |             |
| 0.2700992    | 0.6532121  | 0.7913120   | 0.1008487   | 0          | 0.1008487   | 0           |
|              |            |             |             |            |             |             |
| 0.07257334   | 0.05478199 | 0           | 0.3714366   | 0.2888210  | 0.02335443  | 0.8223993   |
|              |            |             |             |            |             |             |
| 0.2781285    | 0.08893162 | 0.03056221  | 0.04462843  | 0.08514635 | 0.3960468   |             |
|              |            |             |             |            |             |             |
| 0.05067111   | 3.8394020  | 0.1389771   | 0.08250037  | 0.01359956 | 1.1471540   | 0.2854907   |
|              |            |             |             |            |             |             |
| 2.7958970    | 0.1165531  | 0.6189769   | 0.03872991  | 0          | 0.4551119   | 0.449351    |
|              |            |             |             |            |             |             |
| 0.003904637  | 1.2223230  | 0.2951201   | 0.3913246   | 0          | 0.003160178 | 0.1226799   |
|              |            |             |             |            |             |             |
| 0.1313378    | 0.1525109  | 0.07075487  | 0.009712754 | 0.05869499 | 0.02320612  |             |
|              |            |             |             |            |             |             |
| 0.1443224    | 0.9102238  | 3.4960870   | 0.1242456   | 0          | 0.02743131  | 0.02490889  |
|              |            |             |             |            |             |             |
| 0.04953969   | 0.7465119  | 0.1665490   | 0.2374119   | 0          | 0.1274749   | 0.03810278  |
|              |            |             |             |            |             |             |
| 0.4178662    | 0.2263125  | 0.2389338   | 0           | 0          | 0.1651526   | 0.2739704   |
|              |            |             |             |            |             |             |
| 0.004469908  | 0.2630354  | 0           | 0           | 0.1509437  | 0.8394970   | 0.005148581 |
|              |            |             |             |            |             |             |
| 0.65316      | 0.3495655  | 0           | 0.1703222   | 0.3632911  | 0.09907939  | 1.853823    |
|              |            |             |             |            |             |             |
| 0.04326099   | 0.06444271 | 0           | 3.2208320   | 0.4395479  | 0.007755653 | 0           |
|              |            |             |             |            |             |             |
| 0.7733126    | 0.2935859  | 0.4003775   | 0.4527899   | 0          | 0           | 0.07328458  |
|              |            |             |             |            |             |             |
| 2.1797470    | 0.05303595 | 0.4349052   | 0.4941585   | 0.2958227  | 0.0462223   |             |
|              |            |             |             |            |             |             |
| 0.05526937   | 0.1319210  | 0.08628163  | 1.7284850   | 0.3394687  | 0.1218776   | 0.05752109  |
|              |            |             |             |            |             |             |
| 0.1626251    | 0          | 0.9742502   | 0.5980764   | 0          | 0.04786038  | 0.05439823  |
|              |            |             |             |            |             |             |
| 0.1324579    | 0.4806404  | 0           | 0.09907939  | 0.6094950  | 0.2420368   | 0.1194669   |
|              |            |             |             |            |             |             |
| 0            | 0.05784244 | 0.4636028   | 0.4837207   | 0.4013099  | 0.09923766  | 0.4413696   |
|              |            |             |             |            |             |             |
| 0.4033947    | 0.1216336  | 0           | 0.1176568   | 0.5244887  | 0           | 0.1073550   |
|              |            |             |             |            |             |             |
| 0.6155229    | 0.04581326 | 0           | 0.06615844  | 0.02023543 | 0.1674468   | 0.06651261  |
|              |            |             |             |            |             |             |
| 0.09479569   | 0.2066168  | 0.4306414   | 0.2116619   | 0.3382365  | 0.09571209  |             |
|              |            |             |             |            |             |             |
| 1.3260120    | 0.06826679 | 0.05576551  | 0.1896879   | 0.2113020  | 0.2210775   | 0.07539172  |
|              |            |             |             |            |             |             |
| 1.1175360    | 0.4942049  | 0.3676348   | 0           | 0.07248865 | 0.05688899  | 0.8628163   |



|                   |                    |                            |                    |                   |              |                   |
|-------------------|--------------------|----------------------------|--------------------|-------------------|--------------|-------------------|
| 0.2840981         | 0.06917904         | 0.2368604                  | 0.1556962          | 0.1068593         | 0            | 0.3805825         |
| 0                 | 0                  | 0                          | 0.04809505         | 0.3357988         | 0.4726733    | 0.4526250.2044858 |
| 0.2618058         | 0.2071910.03245704 | 0.1737061                  | 0.05882839         | 0.2710418         | 0            |                   |
| 0.009155899       | 0.2274802          | 0.04475704                 | 0                  | 0.1421574         | 0.11788      | 0.3351948         |
| 0.9030260.1697344 | 0.1354913          | 0.1685066                  | 0.1578724          | 0.1203930.1336795 |              |                   |
| 0.2826975         | 0.1222889          | 0                          | 0.4094208          | 1.3366580         | 0.05436649   | 0.3313215         |
| 0.1040583         | 0.1108637          | 0.4406948                  | 0.2272230.03907093 | 0                 | 0.3239780    |                   |
| 0.0897728         | 1.4214670          | 2.4266712.4789910.05745459 | 0.1048191          | 0                 |              |                   |
| 0.1935289         | 0.08081888         | 0.04163725                 | 0.5416473          | 0.06897422        | 0.1067926    |                   |
| TCGA-ZF-AA58      | 1649               | 0                          | 0.096449022        | 0.132609612       | 0.149906518  | 0.216662019       |
| 0.253737872       | 26.767592086       | 0                          | 0.140199603        | 0.226306751       | 0            | 0                 |
| 0.480135369       | 0.791728498        | 0.044674885                | 0.422558094        | 0.097852168       | 0.019389166  |                   |
| 0.360144077       | 0.049254999        | 0.158292492                | 0.226525405        | 1.662660371       | 44.477991834 |                   |
| 0.101495149       | 0.325877146        | 0.697779148                | 0                  | 1.046668723       | 0.897144619  | 0.502140135       |
| 0.103374689       | 0.148013759        | 2.0735201                  | 0.286268369        | 0.058760349       | 0.278543204  |                   |
| 0.174944629       | 0.147474406        | 0.185830327                | 0.06394081         | 0.074980654       | 0.071176015  |                   |
| 0.31872457        | 0.633444901        | 0                          | 0.05189327         | 0.025662631       | 0.777072233  | 0.502811445       |
| 4.533895137       | 0.109968946        | 0.283156756                | 0.462865969        | 0                 | 0.500969645  | 0                 |
| 0.153502641       | 0.587943542        | 0.04884454                 | 0.046408114        | 0.153841072       | 0.029602752  |                   |
| 0.161009575       | 0.24987239         | 0.247836991                | 0.703489289        | 0.623073864       | 0.152734648  |                   |
| 0.177213752       | 0.131371196        | 0.252165929                | 0.393619007        | 0.54976539        | 0.208403372  |                   |
| 0.107173978       | 0.069017896        | 0.062671423                | 0.060535449        | 0.031160791       | 0.122494145  |                   |
| 0.104760408       | 0.398223004        | 0                          | 0.106910075        | 0.134214635       | 0.087613525  | 0.071176015       |
| 0                 | 0                  | 0                          | 1.094756979        | 0.064623427       | 0.022492809  | 0.520684017       |
| 0.110383142       | 0.513294183        | 0.697024793                | 0.265556261        | 0                 | 0            | 0.46597858        |
| 1.780315024       | 0.18846768         | 0.071567092                | 0.045108955        | 0.266597881       | 0.124643165  |                   |
| 0.272909178       | 0.027211443        | 0                          | 0.069529595        | 1.353910376       | 0.045649103  | 0.230398775       |
| 0.043905205       | 0.092816229        | 0.202674441                | 0.295467919        | 1.175253741       | 0.056961563  | 0                 |
| 0                 | 0.148927092        | 0.594132421                | 0.055599932        | 2.217261377       | 0            | 3.587342103       |
| 0.232593049       | 0.591001556        | 0.0905227                  | 0.162815135        | 0.516702576       | 0.053382011  |                   |
| 0.237286631       | 1.04925309         | 0.068194821                | 0                  | 0.144190525       | 0.691711504  | 0                 |
| 0.210731453       | 0.37638525         | 0                          | 0.291609196        | 0.188953735       | 0.039311501  | 0                 |
| 0.498389227       | 0.101495149        | 0.300581787                | 0.245449952        | 0.176652949       | 0.072766541  |                   |
| 1.924620696       | 0.444429764        | 0                          | 0                  | 0.069406096       | 0.507475744  | 0.056374573       |
| 0.847068372       | 0.370034397        | 0.329906839                | 0.097203065        | 0.157563034       | 0            | 0.349395456       |
| 0.14408419        | 0.140307477        | 0.235813188                | 0.025456438        | 0.912818006       | 0.041836865  |                   |
| 0.238508437       | 0.433211001        | 0.152801975                | 0.399410211        | 0.070917663       | 0.063744914  |                   |
| 1.096859854       | 0.472342808        | 0.105230608                | 0.178972362        | 0.731006727       | 0            | 0.521640723       |
| 0.86182087        | 0.018276722        | 0.249200285                | 0.217086846        | 0.33476009        | 0.079792715  |                   |
| 0.071567092       | 0.328919464        | 0.268049307                | 0.043514067        | 0.200361512       | 0.048966958  |                   |
| 0.128980469       | 0                  | 0.313047007                | 0.064481241        | 0.03915394        | 0.112609891  | 0.502521035       |
| 0.176016362       | 0.297314594        | 0.711760151                | 0.16720975         | 0.811625114       | 0.097743383  |                   |
| 0.367482436       | 0.991986251        | 0.444041276                | 0.204584462        | 0.051415306       | 0.918579713  |                   |
| 0.305684873       | 0.168914837        | 0.0433211                  | 0.402380653        | 0.556104824       | 0.390443968  |                   |

|                    |                    |                            |                           |                    |             |             |
|--------------------|--------------------|----------------------------|---------------------------|--------------------|-------------|-------------|
| 0.770109914        | 0.053382011        | 0.170449868                | 0.07066118                | 0.049651375        | 0           | 0.006006092 |
| 0                  | 0.076920536        | 0                          | 0                         | 0.760693662        | 0.075435584 | 0.068393756 |
| 0.130906641        | 0.082039959        | 0.127448246                | 0.228679633               | 0.122879347        | 0.047711395 |             |
| 0.254730328        | 0.280614954        | 0.056467677                | 0.741818013               | 0.276739606        | 0.648716552 |             |
| 4.34044397         | 0.07679604         | 0.813159953                | 0.115951431               | 0.243461884        | 0.093198603 | 0           |
| 0.131038338        | 0                  | 0.038384708                |                           |                    |             |             |
| TCGA-FD-A3SP       | 783                | 0                          | 0.1818140.1111020.1412928 | 0.2282375          | 0.3786668   |             |
| 27.988090.1357383  |                    | 0.3114815                  | 0.09480136                | 0.8045460.0384986  | 3.1438      |             |
| 0.2436789          | 0.3851538          | 0.06316177                 | 0.5318043                 | 0.06148636         | 0.04264179  |             |
| 1.6689630.03868732 | 0.08525539         | 0.2135091                  | 1.15920246.7099           | 0.119579           |             |             |
| 0.1954604          | 0.5978949          | 0.2331033                  | 1.3975790.5449385         | 1.8501220          |             |             |
| 0.6417406          | 0.7982657          | 0.3684071                  | 0.09692191                | 0.3000434          | 0.1253181   |             |
| 0.2252766          | 0.1207948          | 0.1102440.1413445          | 0                         | 0.5407389          | 1.473959    |             |
| 0.1235917          | 0.1222786          | 0.1451283                  | 0.3662106                 | 0.1354056          | 2.74245     |             |
| 0.1727501          | 0.9341025          | 0.8151351                  | 0                         | 0.2120008          | 0.03330048  | 0.2245469   |
| 0.1705108          | 0.1841516          | 0.04374148                 | 0.2320021                 | 0.05580353         | 0.6463762   |             |
| 0.1489284          | 0.03893269         | 0.8439028                  | 1.0067520.01727501        | 0.1600713          |             |             |
| 0.1857338          | 0.3232398          | 2.5295551.3950880.1473213  | 0.4040628                 | 0.09215713         |             |             |
| 0.1624433          | 0.08558558         | 0.02937028                 | 0.1539408                 | 0.1974816          | 0.5160938   | 0           |
| 0.3274927          | 0.1807180.08257921 | 0.1341724                  | 0.2833102                 | 0                  | 0           | 0.09038117  |
| 0.04060676         | 0.09805167         | 0.5962569                  | 0.1339285                 | 0.05202024         | 0.8389596   |             |
| 1.5528460.6898437  | 0                  | 0                          | 0.8784064                 | 0.7744695          | 0.5625211   | 0.4721837   |
| 0.2072702          | 0.2273477          | 0.08811083                 | 0.5027632                 | 0.1282393          | 0.03820573  |             |
| 0.06553439         | 1.2109110          | 0.4777519                  | 0.01379413                | 0.04374148         | 0.1146172   |             |
| 0.1044338          | 2.7487940.3221311  | 0                          | 0                         | 0.1136326          | 0.9369118   | 0.06288616  |
| 1.3434790.1255579  | 0.7953393          | 0.1644211                  | 1.6711270.2986243         | 0.05115323         |             |             |
| 0.9537330.1006293  | 0.2615008          | 0.2387151                  | 0.1285526                 | 0.2234850          |             |             |
| 0.5833375          | 0.07293134         | 0.2837467                  | 0.06450145                | 0.15841            | 0.1963237   |             |
| 0.1424771          | 0                  | 0.05874055                 | 0.5329873                 | 0.09566319         | 0.3895515   | 0.04626926  |
| 0.2331033          | 0.03429267         | 0.6596477                  | 0.5638939                 | 0.0713766          | 0           | 0.3925079   |
| 0.5978949          | 0.04174913         | 2.4009720.2092632          | 1.3820010.04580887        | 0.2651953          |             |             |
| 0.04519059         | 0.7120411          | 0.02716101                 | 0.06612267                | 0.1961146          | 0           | 2.895466    |
| 0.0394329          | 0.09366818         | 0.3674866                  | 0.6153663                 | 0.1568583          | 0.2673708   |             |
| 0.1134884          | 0.4630714          | 1.1737140.1983680.08434426 | 0.7516393                 | 0.4587407          |             |             |
| 0.8492430.6806985  | 0                  | 0.4019615                  | 0.5248766                 | 1.7067010.08595176 |             |             |
| 0.1349096          | 0.7440470.3930065  | 0.1054639                  | 0.1743218                 | 0.1846132          |             |             |
| 0.06335296         | 0                  | 0.1735642                  | 0.06077612                | 0.1845207          | 0.05306964  | 1.593605    |
| 0.7299705          | 0.1200989          | 0.5031466                  | 0.1091089                 | 0.7206416          | 0.02047267  |             |
| 0.2501537          | 2.2683580.1046316  | 0.09641447                 | 0                         | 0.4423982          | 0.1287345   |             |
| 0.2918830.04083185 | 0.2106998          | 0.2446037                  | 0.4710514                 | 0.07218488         |             |             |
| 0.2012586          | 0.1807377          | 0.1332019                  | 0.07019757                | 0                  | 0.06793174  | 0.1047506   |
| 0                  | 0                  | 0.3074588                  | 1.0943440.09480136        | 0.01074397         | 0.8839279   | 0.1439488   |
| 0.1005237          | 0.3423563          | 0.3637231                  | 0                         | 0.04496987         | 0.4033569   | 0.06612267  |
| 0.02661151         | 0.3472812          | 0.4434246                  | 0.7553095                 | 5.7252620.08089899 |             |             |

|              |            |            |            |            |            |            |            |            |
|--------------|------------|------------|------------|------------|------------|------------|------------|------------|
|              | 0.6007196  | 0          | 0.1147362  | 0.1197864  | 0          | 0.2840703  | 0          | 0.07235821 |
| TCGA-E7-A97Q | 246        | 1          | 0.6677708  | 0.7639229  | 0.3942362  | 0.4165730  | 0.02383215 |            |
|              | 62.577470  | 0.3950445  | 1.1619780  | 0.3206928  | 0.2608749  | 1.2159920  | 0.8741759  |            |
|              | 2.3604110  | 0.4951347  | 0.0908476  | 0.03676278 | 0.02185337 | 0.4735679  |            |            |
|              | 0.06476738 | 0.1274358  | 0          | 10.5068769 | 0.555990   | 0.1072447  | 0.1168661  |            |
|              | 0.3574823  | 0.1672474  | 0.1966153  | 5.0558210  | 0.1543522  | 0.2330255  |            |            |
|              | 0.2001901  | 2.1724660  | 0.8066267  | 0.2649132  | 0.9866802  | 0.8675859  |            |            |
|              | 0.5903575  | 0.06500104 | 0.1300724  | 0.3863317  | 1.0027740  | 0.07184636 |            |            |
|              | 74.652440  | 0.4926378  | 0.9650597  | 0.04820689 | 1.1886290  | 0.8500718  | 2.541887   |            |
|              | 0.2478901  | 0.9574308  | 0.2608462  | 0          | 1.1408010  | 0.07964162 | 0.09827055 |            |
|              | 1.1214350  | 0.05505227 | 0.3138372  | 0.6242147  | 0.03336501 | 0.1299433  |            |            |
|              | 0.4307268  | 0.1862233  | 0.8649784  | 0.7022613  | 0.04131502 | 0.5076627  |            |            |
|              | 0.2961347  | 1.0686451  | 0.2906032  | 1.448940   | 0.4991406  | 0.1570334  | 0.1944737  |            |
|              | 0.6180688  | 0.1705725  | 0.07024213 | 0.4602071  | 1.0626710  | 0.6732507  |            |            |
|              | 0.02375502 | 0.5723629  | 0.1728825  | 0.09874847 | 0.2005547  | 0.846958   |            |            |
|              | 0.1539924  | 0.04665447 | 0.1711236  | 0.2913461  | 0.1647845  | 1.2505020  |            |            |
|              | 0.4354417  | 0.3778835  | 2.1425750  | 0.09490197 | 0          | 0          | 0.2250859  | 7.614707   |
|              | 2.9030780  | 0.1209940  | 0.1016838  | 1.1446870  | 0.5268161  | 0.55195    | 0.5213864  | 0          |
|              | 0.3134649  | 2.6621130  | 0.4116058  | 0.5712971  | 0.03299012 | 0.2615311  | 1.461969   |            |
|              | 1.9981160  | 0.4520524  | 1.0272140  | 0.0846958  | 0.07352557 | 0.3397055  | 1.519571   |            |
|              | 0.3007978  | 0.3732357  | 0.1501426  | 1.9265250  | 0.1310768  | 0.7444791  |            |            |
|              | 0.6121642  | 0          | 1.3952640  | 0.9024962  | 0.1110920  | 0.1631178  | 0.6148945  |            |
|              | 0.5344881  | 1.3407561  | 0.1078840  | 0.04360576 | 0          | 0.1156965  | 0.3314975  |            |
|              | 0.4695291  | 0.8315260  | 0.04430766 | 0          | 0.3888902  | 0          | 0.9316538  | 0          |
|              | 0.04100728 | 2.0377562  | 0.9207080  | 0.3983110  | 0.9146064  | 1.0169513  | 0.43183    | 0.6353931  |
|              | 1.6603891  | 0.2928940  | 0.4957803  | 0.1095568  | 0.4059154  | 0.1891366  | 0.4683035  |            |
|              | 0.2598337  | 0.07906969 | 0.07035434 | 0.04303761 | 0.3165629  | 0.1414619  |            |            |
|              | 0.2800217  | 0.8788832  | 0.1409088  | 1.0504012  | 0.7975750  | 0.3113342  | 4.004972   |            |
|              | 0.2419880  | 0.07906969 | 0.03361971 | 0.5243073  | 0.8620284  | 0.1603464  |            |            |
|              | 2.2031760  | 0.9121086  | 0.6436063  | 0.9432632  | 0.3597348  | 0.3226507  |            |            |
|              | 0.3336501  | 0.9399168  | 0.2382154  | 0.8569799  | 0.2759512  | 0.1719904  |            |            |
|              | 0.0387692  | 2.8434160  | 0.2180288  | 0.04413008 | 0.4442258  | 0.5095591  |            |            |
|              | 0.1190319  | 1.1010451  | 0.7648820  | 0.2174547  | 0.9147758  | 0.2692940  | 0.1380621  |            |
|              | 2.1615810  | 0.1668251  | 0.4227399  | 0.05794976 | 0.0811382  | 1.2388590  | 0.2855737  |            |
|              | 0.09765369 | 0          | 0.08357081 | 1.7426621  | 0.5777170  | 0.3008321  | 0.6483801  |            |
|              | 0.03982081 | 0.1399041  | 0.08535236 | 0.4603202  | 0.22547    | 0.3467860  | 0.01139209 |            |
|              | 0.4547376  | 2.8879880  | 0.2550684  | 0.3340394  | 1.3506160  | 0.3073829  | 0.1849331  |            |
|              | 0.4668491  | 1.1115160  | 0.1938948  | 0.1075502  | 0.5053038  | 0.03953484 | 0.1272885  |            |
|              | 0.5260212  | 0.03119109 | 3.9998924  | 0.0264550  | 0.2240277  | 0.2229338  | 0.06534394 |            |
|              | 0.2744038  | 0.03819759 | 0          | 1.2110760  | 0.1575639  | 0.1838681  |            |            |
| TCGA-YC-A9TC | 20         | 1          | 0.1249524  | 0.1336218  | 0.05035023 | 0.2054736  |            |            |
|              | 0.06391864 | 78.045590  | 0.2902252  | 0.3229021  | 0.9374733  | 0          | 0.1234721  |            |
|              | 0.1881006  | 0.4465846  | 1.3896660  | 0.1650582  | 0.3076469  | 0.09859903 |            |            |
|              | 0.3321316  | 0.1512054  | 0.07444641 | 0.02278581 | 0          | 2.0549712  | 0.231.6455 |            |

|              |             |             |             |             |             |             |             |   |
|--------------|-------------|-------------|-------------|-------------|-------------|-------------|-------------|---|
| 0.08309423   | 0.2089592   | 1.4701290   | 1.495211    | 0           | 2.7119760   | 0.5059728   |             |   |
| 0.06944247   | 0.0298287   | 0.5002660   | 0.1886041   | 0.05920884  | 0.4009560   | 0.1339727   |             |   |
| 0.1229793    | 0.03874111  | 0.04714306  | 0.04317311  | 0.3585964   | 0.4817359   |             |             |   |
| 13.403870    | 0.1761695   | 0.2353021   | 0           | 1.39822     | 0.2533246   | 11.7215     | 0.07387219  |   |
| 0.7132949    | 0.06136827  | 0           | 1.2259270   | 0.4984035   | 0.01361133  | 1.276005    |             |   |
| 0.9351296    | 0           | 0.5890580   | 0.0298287   | 0.01402061  | 0.1592135   | 0.3329715   |             |   |
| 0.4510919    | 0.08968993  | 0.2093046   | 0.1860066   | 0.1838526   | 0.2134361   |             |             |   |
| 0.54085      | 8.3946480   | 0.3937388   | 0.4751648   | 0.01159078  | 0.03157488  | 0.04574812  |             |   |
| 0.06279726   | 0.1645721   | 0.21112     | 0.2257101   | 0           | 0.08079455  | 0.1497289   |             |   |
| 0.08828224   | 0.07171927  | 0.4543140   | 0           | 0.03220767  | 0.06511667  | 0.01133224  |             |   |
| 0.4363979    | 0.03579444  | 0           | 0.1195866   | 0.8513271   | 0.02610567  | 0           |             |   |
| 0.0427977    | 0.03353823  | 3.863792    | 1.5509      | 0.03605667  | 0.05113491  | 0.8186902   |             |   |
| 0.06279726   | 1.3374620   | 0.02741914  | 0.04084427  | 0           | 3.2562620   | 0.09199505  |             |   |
| 1.3000810    | 0.009831181 | 0           | 0.4492870   | 0.4093693   | 0.3414826   | 0.2869816   | 0           | 0 |
| 0.1321991    | 1.38154     | 0.04481944  | 0.8704616   | 0           | 2.3633050   | 0.1401206   |             |   |
| 0.1064159    | 0           | 1.0629860   | 0.3227367   | 0.06253325  | 0.07291459  | 0.2748613   |             |   |
| 0.04778383   | 0.5448415   | 1.3695260   | 0.07796808  | 0.5763511   | 0           | 0           | 0.3777878   |   |
| 0.2665543    | 0.03961155  | 0.03139863  | 0.1207195   | 0.05113491  | 0.227157    |             |             |   |
| 0.1978587    | 0.6052043   | 0           | 0.5289029   | 1.3779140   | 0.2201415   | 0.874198    |             |   |
| 1.0866170    | 0.07303481  | 0.1917358   | 0.1491435   | 0.7017858   | 0           | 0.04536161  |             |   |
| 0.02415575   | 1.3511580   | 0.08711035  | 0.1767230   | 0.4053399   | 0.1410790   | 0.1061291   |             |   |
| 0.04215619   | 0.2002741   | 0.4801693   | 0.3709235   | 0.1006147   | 0.2501063   |             |             |   |
| 0.1355997    | 2.3773990   | 0.0432680   | 0.4948243   | 0.0300564   | 0.2678495   | 0.1751507   |             |   |
| 0.3822707    | 1.1255220   | 0.5306802   | 0.1854567   | 0.07666254  | 0.05742981  |             |             |   |
| 0.07211333   | 0.4142875   | 0.06002116  | 0.04384619  | 0.1656540   | 0.0986814   |             |             |   |
| 0.1885407    | 0           | 0.2597711   | 0.4548138   | 0           | 0.1134694   | 0.1591890   | 0.2483037   |   |
| 0.4279770    | 0.5737542   | 0.2592092   | 0.3792788   | 0.1422625   | 0.2057152   |             |             |   |
| 0.2781378    | 0.03728587  | 0.06871532  | 0           | 0.1537815   | 0.2031608   | 0.1134694   |             |   |
| 0.0873035    | 0.1351506   | 0.03735662  | 0.04721089  | 0.9003174   | 0           | 0.02146885  |             |   |
| 0.1424010    | 0.1500910   | 0.3815298   | 0.06051934  | 0.2239697   | 0           | 0.02036931  |             |   |
| 0.5708867    | 0.8068418   | 0.1013485   | 0.01148596  | 0.2099940   | 0.0879372   |             |             |   |
| 0.01653323   | 0.2439999   | 0.3744407   | 0.1981076   | 0           | 0.2926090   | 0.1413784   |             |   |
| 0.08534801   | 0.7078784   | 0.05577037  | 2.2301614   | 0.7018840   | 0.1092454   | 0.1328702   |             |   |
| 0            | 0.1839901   | 0.2219690   | 0.02639     | 0.9638810   | 0.04371637  | 0.02900826  |             |   |
| TCGA-K4-A6FZ | 55          | 0           | 0.068018289 | 0.084860424 | 0           | 0.188747424 | 0.104383045 |   |
| 29.046781144 | 0           | 0.06591487  | 0.517213286 | 0.156067854 | 0.15682916  |             |             |   |
| 0.53078859   | 0.273487524 | 0.504313378 | 0.049009113 | 0.128615988 | 0.026836375 |             |             |   |
| 0.010635123  | 0.44446974  | 0.027016788 | 0.111631868 | 0.046594171 | 1.15278805  |             |             |   |
| 32.296073862 | 0.130478806 | 0.536239206 | 0.41753218  | 0.244177047 | 0           |             |             |   |
| 0.442882348  | 0.713609321 | 0.085052851 | 0.048712088 | 0.672794753 | 0.108706603 |             |             |   |
| 0.060432289  | 0.163696425 | 0.207270631 | 0.062760238 | 0.115988769 | 0.089818744 |             |             |   |
| 0.12338259   | 0.175682939 | 0.209787784 | 3.159622949 | 0.179809719 | 0.042695854 |             |             |   |
| 0.014076172  | 0.685013733 | 0.768289912 | 3.264030347 | 0.271435085 | 1.397825124 |             |             |   |
| 0.180392644  | 0           | 0.395355562 | 0.029068696 | 0.018186663 | 0.669791205 | 0.080374945 |             |   |

|              |                            |                    |                           |             |                   |             |
|--------------|----------------------------|--------------------|---------------------------|-------------|-------------------|-------------|
| 0.038182872  | 0.177204602                | 0                  | 0.009812792               | 0.123956093 | 0.13594071        | 0.368330352 |
| 0.768963024  | 0.030159454                | 0.11542887         | 0.090072781               | 0.232369484 | 0.677151548       |             |
| 1.913689158  | 0.214333186                | 0.079360889        | 0.018928453               | 0.232036729 | 0                 | 0.076913823 |
| 0.10078363   | 0.25857891                 | 0.184299236        | 0.034681745               | 0.241894498 | 0.15775259        |             |
| 0.360425761  | 0.02928049                 | 0.329743363        | 0.11241251                | 0.10217154  | 0.085470289       |             |
| 0.070893005  | 0.043952337                | 0.588548785        | 0                         | 0.13622872  | 0.156233757       | 1.320755847 |
| 0.05062569   | 0.02326337                 | 0.104836884        | 0.082154969               | 0.56337578  | 0.180908235       |             |
| 0.35329646   | 0.148455886                | 0.240237001        | 0.128189704               | 0.540936135 | 0.11194282        |             |
| 0.100051798  | 0.114412733                | 1.08955413         | 0                         | 0.113738129 | 0.040137301       | 0.038182872 |
| 0.166752997  | 0.243100022                | 1.460664971        | 0.515524426               | 0           | 0.026836375       | 0.195467197 |
| 1.522893687  | 0.064043781                | 1.492592929        | 0.073068131               | 1.135752263 | 0.143526687       |             |
| 0.085809549  | 0.099304951                | 0.089305494        | 0.681969227               | 0.307445143 | 0.0750887         | 0           |
| 0.224432655  | 0.11705089                 | 0.26692786         | 0.339471816               | 0.031831661 | 0.049537716       |             |
| 0.028152345  | 0.034569869                | 0.102825089        | 0.248742575               | 0.032344042 | 0.051275882       |             |
| 0.417941826  | 0.041753218                | 0.401874723        | 0.403894194               | 0.174412176 | 0.029934802       |             |
| 0.62380554   | 1.322002589                | 0.269993354        | 0.25678896                | 0.285523782 | 0.782872837       |             |
| 0.32468032   | 0.040402109                | 0.63934615         | 0.422232354               | 0.079975069 | 0.129637007       |             |
| 0.118343477  | 0.303008491                | 0.023709423        | 0.057719888               | 0.051357792 | 0.178029193       |             |
| 0.361073426  | 0.068843636                | 0.098117938        | 0.35642991                | 0.171436071 | 0.219079917       |             |
| 0.233393669  | 0.049533227                | 0.192711856        | 1.095219026               | 0.028859944 | 0.319045582       |             |
| 0.437414665  | 0.54346048                 | 0.039016963        | 0.491202224               | 0           | 0.34031206        | 0.213556616 |
| 0.13771408   | 0.0937864                  | 0.029441372        | 1.001304024               | 0.122522781 | 0.086947124       |             |
| 0.219800006  | 0                          | 0.053807494        | 0                         | 0.257563442 | 0.053052769       | 0.032214407 |
| 0.277953699  | 0.316659997                | 0.202747608        | 0.314510653               | 0.263524409 | 0.158739193       |             |
| 0.48389491   | 0.044677568                | 0.033594543        | 0.721541077               | 0.213115383 | 0.056108164       | 0           |
| 0.19901239   | 0.235452567                | 0.301116507        | 0                         | 0.183924358 | 0.030502825       | 0.308393073 |
| 0.4883408    | 0.08784147                 | 0.227889701        | 0.116274784               | 0.020425653 | 0                 | 0.088948601 |
| 0.018287814  | 0                          | 0.074844749        | 0.014125649               | 1.581146451 | 0.103442657       | 0.03751456  |
| 1.114532565  | 0.188483957                | 0.097874171        | 0.372251864               | 0.540928669 | 0.040440224       |             |
| 0.058882743  | 0.377248762                | 0.34631933         | 0.162608269               | 0.905405461 | 0.045538212       |             |
| 0.973290345  | 3.408395507                | 0.126369855        | 0.126574716               | 0           | 0.200311388       | 0.034854703 |
| 0            | 0.269533684                | 0.051560537        | 0.071058399               |             |                   |             |
| TCGA-KQ-A41R | 1350                       | 0                  | 0.1142474                 | 0.0244348   | 0.08286585        | 0.1268123   |
|              | 0.2103932                  | 50.745930          | 0.2158929                 | 3.3776630   | 0.02257878        | 0.04097301  |
|              | 0.3674921.6941460.07408662 | 0.05670805         | 0                         | 0.3751304   | 0                 | 0.1089094   |
|              | 0.1125019                  | 0                  | 5.550692123.19530.1157162 | 0           | 0                 | 0.1640534   |
|              | 1.1241010.07570222         | 0                  | 0                         | 0.06390641  | 0.09744526        | 0.3959334   |
|              | 0.0580239                  | 0.3879295          | 0.02125323                | 0.07500127  | 0.1598711         | 0.1180348   |
|              | 0.1057114                  | 35.486320.07248445 | 0.1290859                 | 0.01418588  | 1.1045640.2382393 |             |
|              | 6.1816840.06078902         | 0.4695732          | 0.1615987                 | 0.1218066   | 2.8653550.468724  |             |
|              | 0.03462032                 | 3.1500530          | 0.2308828                 | 0.6633183   | 0                 | 0.003296424 |
|              | 0.1370002                  | 0.1590862          | 0.2214160                 | 0.1959217   | 0.07261983        | 0.2174533   |
|              | 0.5340751.8935390.08640146 | 0.05331961         | 0.01907598                | 0.2858108   | 0                 |             |
|              | 0.05167552                 | 0.1015691          | 0                         | 0.2889221   | 0                 | 0.0443236   |
|              |                            |                    |                           |             | 0.07949104        | 0           |
|              |                            |                    |                           |             |                   | 0           |

|              |            |            |             |            |             |                     |
|--------------|------------|------------|-------------|------------|-------------|---------------------|
| 0.3323133    | 0.3398659  | 0.06864523 | 0.02650352  | 0.7859008  | 0.00466262  |                     |
| 0.5810310    | 0          | 0.3493453  | 1.0158010   | 0.01074111 | 0.6095617   | 0 0                 |
| 0.7570222    | 0.6250910  | 1.186833   | 0.1215605   | 1.2842320  | 0.1033510   | 0.3085767           |
| 0.04512611   | 0 0        | 6.1293910  | 0.07570222  | 0.6877475  | 0.008090025 | 0.07696092          |
| 0.6049895    | 0.2449947  | 0.06187247 | 0 0         | 0.05409107 | 0.2587340   | 0.4926399           |
| 0.03688167   | 0.5491618  | 0          | 0.3731625   | 0.0482151  | 0.05765222  | 0.1125888           |
| 0.09000152   | 1.2139050  | 0.4426304  | 0.1331861   | 0.06000102 | 0.4523637   | 0                   |
| 0.05977961   | 2.2137020  | 0.5774355  | 0.09984761  | 0 0 0      | 0.8773843   | 0                   |
| 0.05167552   | 0.2702033  | 0.08415727 | 0.1246175   | 0.08140841 | 0.7030860   |                     |
| 1.8376430    | 0.6576489  | 0.7535011  | 0.05175806  | 0.1726495  | 1.0519660   | 0.3004997           |
| 0.1323302    | 0          | 0.1823671  | 0           | 0.07465564 | 0.03975527  | 0.9865803 0         |
| 0.05816975   | 0.04600717 | 0          | 0.08733301  | 0          | 0.6756981   | 0.1436831           |
| 0.1958085    | 0.2207874  | 0.5292286  | 0.1174571   | 1.3358120  | 0.14242     | 0.232679            |
| 0.1483995    | 0.3306178  | 0.1153044  | 0.3932105   | 0.7185927  | 0           | 0.3919593           |
| 0.6026189    | 0.1514044  | 0.1134208  | 0           | 0.02727319 | 0.4939108   | 0.0103088           |
| 0.2641118    | 0          | 0.1265293  | 0           | 5.1608790  | 0.2138650   | 0.1867467 0.2006744 |
| 0            | 1.5495910  | 0.1770522  | 0.02133018  | 0.4486530  | 0.1080619   | 0.06771275          |
| 0.3719268    | 0.06136468 | 0.1696364  | 0           | 0.03820256 | 0.7657919   | 0                   |
| 0.07184157   | 0.2224294  | 0          | 0.2071978   | 0.5362460  | 0.07066641  | 0.0585905           |
| 0.08233939   | 0          | 0.1693235  | 0.1105821   | 0          | 0.03352359  | 0.3416578           |
| 0.5975511    | 0.0833991  | 0.03780694 | 0           | 0.05427228 | 0.1428536   | 0.2166377           |
| 0.2607213    | 0.08151081 | 0          | 0.6167510   | 0.1404648  | 0.3666142   | 0                   |
| 1.2023644    | 0.3998360  | 0.05993165 | 0.1822303   | 0.09614406 | 0.3028089   | 0.02810108          |
| 0            | 0.7823070  | 0.03197686 | 0           |            |             |                     |
| TCGA-DK-AA6M | 1582       | 0          | 0.04393104  | 0.04697905 | 0.07966012  | 0.2234952           |
| 0.03370899   | 178.45360  | 0.07652852 | 0.1596469   | 0.6012955  | 0           | 0.0651159           |
| 0.3238564    | 0.05887922 | 0.6921579  | 0.07122052  | 0.1246040  | 0.1039970   | 0.875787            |
| 0.09569004   | 0.03926106 | 0.1081497  | 0.09028147  | 1.74721645 | 0.549750    | 0.06067618          |
| 0.3542127    | 0.3033809  | 0.1577069  | 0           | 1.6209211  | 0.1643780   | 0 0.325904          |
| 0.1316446    | 0.1170944  | 0.1268721  | 0.07809089  | 0.1297121  | 0.1021552   |                     |
| 0.04475159   | 0.01707627 | 0.1134685  | 0.1016219   | 3.9131120  | 0.08272804  |                     |
| 0.02727417   | 0.1769722  | 0.1145114  | 4.9272790   | 0.2821296  | 0.2330208   |                     |
| 0.1170944    | 1.1898160  | 0.04502725 | 0.8651974   | 0.07786777 | 0           | 0.6376573           |
| 0            | 0.02535119 | 0.1288765  | 0.06585012  | 0.3058636  | 0.1419003   | 0.02921867          |
| 0.05885697   | 0.02327016 | 0.08040038 | 0.1140920   | 0.7415978  | 0.1245884   |                     |
| 0.5638259    | 0.04584502 | 0          | 0.04825268  | 0.09935281 | 0.06509322  | 0                   |
| 0.1587114    | 0          | 0.0426089  | 0.09169904  | 0.5586925  | 0.1134685   | 0                   |
| 0.2178119    | 0 0        | 0.0686816  | 0.004482243 | 0.3103074  | 0.1132622   | 0                   |
| 0.1513603    | 0.5050882  | 0.08776742 | 0.09015082  | 0.0677111  | 0           | 3.202039            |
| 0.4506816    | 0          | 0.03595626 | 0.1011927   | 0          | 0.3361910   | 0.06462055          |
| 0.0554219    | 2.3947190  | 0.5142211  | 0 0         | 0.1292411  | 0.1177584   |                     |
| 0.4411350    | 0 0        | 0.02261133 | 0.7103726   | 0.01772744 | 1.9280450   |                     |
| 0.5863797    | 0 0        | 0.1322850  | 0.6006329   | 0          | 0.05237742  | 0 0.05435795        |
| 0            | 0.1149340  | 0.8125332  | 0 0         | 0.05454835 | 0           | 0.2656471.2651630 0 |

|              |            |            |            |            |             |            |
|--------------|------------|------------|------------|------------|-------------|------------|
| 0.07639712   | 0.08090158 | 0.05989828 | 0          | 0.1689716  | 0           | 0.4648822  |
| 0.7085081    | 0          | 0.04975576 | 0.1659704  | 0.2022539  | 0.05777493  | 0.1957091  |
| 0.1769722    | 0.4090614  | 0.07748037 | 0.05382565 | 0          | 0.8731427   | 0.04593969 |
| 0            | 0.2211367  | 0.1217477  | 0.8115599  | 0          | 0.2693290   | 0.2071870  |
| 0.05306151   | 0.05652833 | 0.1693698  | 2.1493331  | 3.3006480  | 0           | 1.4831960  |
| 0.3023991    | 0.3377212  | 0          | 0.3112663  | 0.1655160  | 0.3153523   | 0.01817217 |
| 0.05704598   | 0.5767983  | 0.09496069 | 0.04954996 | 0.2047535  | 0           | 0.1534911  |
| 0            | 0.2642073  | 0          | 0          | 0.1714765  | 0.05612091  | 0.1354222  |
| 0.12303      | 1.0876170  | 0.1038814  | 0.1627331  | 0.6921579  | 0.5309166   | 0.05435795 |
| 0            | 0.1560798  | 0.0933169  | 0.04488056 | 0.2071870  | 0.4276491   | 0.1773080  |
| 0.5968958    | 0          | 0.1698316  | 0.05632388 | 0          | 0           | 0.02872466 |
| 0.1226264    | 0          | 0          | 0.1276521  | 0          | 0.4152948   | 0.1043454  |
| 0.07111212   | 0.2278501  | 0.5485025  | 0          | 0.1624360  | 0.3355164   | 0.04501027 |
| 0.7753492    | 0.04411772 | 0.3650052  | 4.7305020  | 0.0504115  | 0.4905056   |            |
| 0.1848493    | 0.09703149 | 0.1350699  | 0          | 0.1253405  | 0.007684951 | 0.03059637 |
| TCGA-ZF-AA52 | 1077       | 1          | 0.0569524  | 0.1015064  | 0           | 0.1931601  |
| 39.377120    | 0.2645651  | 0.1655735  | 0.2078726  | 0          | 0.0562777   | 3.771075   |
| 0.1017750    | 0.8093444  | 0.03077687 | 0.4374966  | 0.08988147 | 0.008904896 |            |
| 0.2481060    | 0.1131071  | 0.1557841  | 0.07802754 | 3.19173    | 33.384330   | 0.03496039 |
| 0.3877714    | 0.6118068  | 0          | 8.412344   | 2.3623231  | 3.3837130   | 0.08157424 |
| 0.4023841    | 0.3868398  | 0.1012011  | 0.8223880  | 0.09641655 | 0.3713518   |            |
| 0.1765792    | 0.07735488 | 0.04427549 | 0.1961348  | 0.1317431  | 11.07327    |            |
| 0.06022259   | 0.1787483  | 0.1414334  | 0.8412344  | 0.4948437  | 3.799642    |            |
| 0.05050563   | 0.4389049  | 0.3524373  | 0          | 0.6057240  | 0.3570091   | 1.3085870  |
| 0            | 0.3391433  | 0.6933811  | 0.4436829  | 0.1468244  | 0.1138245   | 0.0881162  |
| 0.4905604    | 0.02525281 | 0.06104195 | 0.2715078  | 0.1111802  | 0.3451218   |            |
| 1.9810890    | 0.5168308  | 0.3328287  | 0.06476223 | 0.12511    | 0           | 0.2250324  |
| 0.07217024   | 0.5829701  | 0          | 0.1104767  | 0.1651098  | 0.4828610   | 0.06902436 |
| 0.09412412   | 0          | 0.03303006 | 0.08903914 | 0.1317115  | 0.1542088   | 0.1957782  |
| 0.3041751    | 0.8707446  | 0.9021670  | 0.4149699  | 0.1168719  | 0           | 0.6878918  |
| 2.3900491    | 2.983680   | 0.04930311 | 0.1165346  | 0.3323395  | 0           | 0.2734679  |
| 0.05584958   | 0          | 3.5130150  | 0.5079151  | 0.02688589 | 0.0639418   | 0.05584958 |
| 0.6106503    | 1.7006750  | 0.07848251 | 0          | 0          | 0.05374129  | 0.8658319  |
| 0.6943128    | 0          | 1.4845970  | 0.2002939  | 2.68237    | 0.1247236   | 0          |
| 0.2942022    | 0.1458643  | 0.04985093 | 0.04697993 | 0          | 0.1490009   | 1.1035320  |
| 0.4562627    | 0.1885779  | 0.1736742  | 0.5165789  | 1.1975790  | 0.05416398  | 0          |
| 0.1650693    | 0.1398416  | 0.5694510  | 0.06763693 | 0.1460371  | 0           | 0.8839239  |
| 0.2072542    | 2.1215630  | 0.3825151  | 0.4370049  | 0.08322187 | 1.30242     |            |
| 0.0509839    | 0.6060675  | 0          | 0.04651987 | 0.03303006 | 0.3122610   | 0.3573385  |
| 0.09665889   | 0.2293461  | 0.0526114  | 0.3869829  | 0.05764347 | 0.1506177   |            |
| 0.2387539    | 0.4210658  | 0.09171891 | 0.1465671  | 0.1171049  | 3.345259    |            |
| 0.2958187    | 0.09665889 | 0.1232954  | 0.8240663  | 0.09579893 | 0.8494017   |            |
| 0.7031708    | 0          | 0.3433519  | 0.2535895  | 1.9707420  | 0.04930311  | 0.4985093  |
| 0.1641433    | 0.02569472 | 0.2406687  | 0          | 0.1001190  | 1.0148730   | 0.1776865  |

|              |             |             |             |              |              |             |
|--------------|-------------|-------------|-------------|--------------|--------------|-------------|
| 0.1078938    | 0.1551556   | 0.9355250   | 0.1455108   | 0.4096446    | 1.0787410    | 0.1594967   |
| 0.3565497    | 0.07481795  | 0.1687743   | 3.1059440   | 0.1019678    | 0.1409398    | 0           |
| 1.2338930    | 0.1613019   | 0           | 0           | 0.3080034    | 0.1532419    | 0.08607354  |
| 0.5148538    | 0.02935605  | 0.04867902  | 0.06841042  | 0.1043391    | 0.03310114   | 0           |
| 0            | 0           | 0           | 0.6619549   | 0            | 0.1256453    | 1.3639210   |
| 0.1097501    | 0.09846196  | 0           | 0.03286874  | 0.2807770    | 0.1449883    | 0           |
| 0.0381296    | 2.1030861   | 1.656030    | 0.03112081  | 0.2725259    | 0            | 0           |
| 0.1805466    | 0.01328374  | 0.01322176  |             |              |              |             |
| TCGA-K4-A5RJ | 539         | 0           | 0.173276234 | 0.102943564  | 0.069822591  | 0.409598542 |
| 19.766486123 |             | 0.067077723 | 0.181910934 | 0.175679751  | 0.132527346  | 0.095124158 |
| 0.395105413  | 0.464472021 | 0.249809716 | 0.052021024 | 0.017065029  | 0.045577017  |             |
| 0.090309736  | 0.083872913 | 0.195004523 | 0.189587731 | 0            | 2.101387387  |             |
| 30.781821114 |             | 0.168412997 | 0.186281804 | 0.886384196  | 0.414693163  | 0           |
| 1.309316084  | 3.06175326  | 0           | 0.041364596 | 0.816162429  | 0.10000232   | 0.041053584 |
| 0.444816835  | 0.293344913 | 0.113693423 | 0.080585667 | 0.102420958  | 0.119739619  |             |
| 0.8453748    | 1.024330448 | 0.055320432 | 0           | 0.326302389  | 0.047811967  | 0.310234469 |
| 0.150554963  | 2.465547619 | 0           | 0.544034358 | 0.374447588  | 0            | 0.32857905  |
| 0.345577636  | 0.463304272 | 0.568763192 | 0           | 0.06484711   | 0.257958739  | 0           |
| 0.00277756   | 0.236191298 | 0.115436081 | 0.089363775 | 0.746258767  | 0.0512207    |             |
| 0.092859297  | 0.122378632 | 0.267791446 | 0.700016237 | 1.418214714  | 0.691616042  |             |
| 0.104829639  | 0           | 0.153251349 | 0.46523155  | 0.04354168   | 0.313800382  | 0.365960231 |
| 0.521668151  | 0           | 0.074693935 | 0.140655863 | 0.122424364  | 0.198911718  | 0.350008118 |
| 0            | 0           | 0.200986257 | 0.030099926 | 0.007857428  | 0.734363235  | 0           |
| 1.298624716  | 0.004525217 | 0           | 0           | 0.046508745  | 1.02058442   | 0.790050479 |
| 0.05000116   | 0.157579413 | 0.266088043 | 0.130625039 | 0.936021711  | 0.152092664  | 0           |
| 0            | 3.4660895   | 0.255146105 | 0.386329716 | 0.02726655   | 0            | 0.28320159  |
| 0.361256016  | 1.146939398 | 1.512279975 | 0           | 0.091154034  | 0.222963429  | 1.708285238 |
| 0.108767463  | 0.42248585  | 0.062046894 | 1.717249134 | 0.853144789  | 0.097155278  |             |
| 0.231897271  | 0.075835092 | 0.962666957 | 0.149183788 | 0.198939592  | 0.101113456  |             |
| 0.285870505  | 0.198791019 | 0.604442064 | 1.390467034 | 0            | 0.210328453  | 0.286871803 |
| 0            | 0.232841222 | 0.264029335 | 0           | 0.217708399  | 0.187495151  | 0.709107357 |
| 0.105002436  | 0           | 0.148104701 | 0.101678336 | 1.629888551  | 1.442658134  | 0           |
| 0.305278646  | 0.484913557 | 1.240937874 | 0.067520115 | 0.094347146  | 0.620468937  |             |
| 0.102441401  | 0.203736069 | 0.267344911 | 0.133990838 | 1.042411806  | 0.040266421  |             |
| 0.147041113  | 0.319815725 | 0.035570858 | 2.256656116 | 0            | 0.124977466  | 0.665869103 |
| 0.388206658  | 0           | 0.099094857 | 0.11876295  | 1.596528259  | 0.780018092  | 0           |
| 0.125041068  | 2.414341715 | 0.582931671 | 0.331318365 | 0.847678607  | 0.076615435  |             |
| 0.31949459   | 0.329717793 | 0           | 0.127424192 | 0.250005799  | 14.224824893 |             |
| 0.041616819  | 0.121606384 | 0.258433552 | 0.136845279 | 0.21068829   | 0            | 0.128655199 |
| 0.270303299  | 0.109421376 | 0.157352353 | 0.852484289 | 0.787045282  | 0.178047608  |             |
| 1.094014447  | 0.161754904 | 1.347773585 | 0.106228145 | 0.11410923   | 0.028124273  | 0           |
| 0.047645084  | 0.143687543 | 0.016094699 | 0.190849966 | 0.157352353  | 0.060533555  |             |
| 0.437309915  | 0.207215433 | 0.403726391 | 1.248504569 | 0            | 1.042008902  | 0.296209402 |
| 0.104068488  | 0.105816408 | 0.075532032 | 0.279528668 | 11.070729225 | 0.014123452  |             |



0 1.734261537 0.03513595 0.063712096 0.218405066 0.335351162 0.063049961  
0.271581642 0.758905679 11.744423354 0.10000232 0.370178078 0.147041113  
0 1.599458774 0.386694522 0.853144789 17.056798251 0.164119414  
0.614187474 0.081010781 0.170097403 6.973145263 0.109788069 1.025375896  
0.006735908 0.080453733  
TCGA-HQ-A5ND 274 1 0.045626628 0.146376828 0 0.253223319 0  
12.528194561 0.105976344 0.077377397 0.305312801 0.523451117 0.015028701  
0.206056014 0.122303512 0.507439671 0.147938776 0.072794977 0.072007299  
0.185484895 0.033127782 0.072491382 0.07488259 0.125021368 0.649563213  
23.745968536 0.063018076 0.277956909 0.420120507 0.109195879 0.962776162  
0.748214617 0.050388285 0.076071203 0.032676039 0.805911287 0.206607587  
0.162151775 0.087845972 0.146761295 0.028066354 0.091951597 0.125665037  
0.059117835 0.117848011 0.07036276 1.332864588 0.048246501 0.286403533 0  
0.673943313 0.911805659 1.380132719 0.040461887 0.234415066 0.228569303 0  
0.090282307 0.038998528 0.060998012 1.148199719 0 0.051226095 0.237737484  
0 0.004388277 0.15007502 0.319161315 0.176482701 0.049125709 0.053949183  
0.163009721 0.233626969 0.222676159 0.552979129 0.186720225 0.143774574  
0.153790685 0.044440183 0.069177822 0 0.034395831 0.225351996 0.231272772  
0.219782788 0.558347858 0.147511532 0.058201189 0.096709354 0.157130681  
0.552979129 0.226218735 0.091382144 0.149948942 0 0.043448929 0.241713168  
0.039211247 0.060921429 0.645184305 1.328943355 0.028597628 0.03121011  
0.140649039 0.293917356 0.806212562 0.277378598 0.039498509 0.143152173  
0.392367257 0.240770817 1.916994314 0.090109412 0.044743125 0.422113961  
2.661684063 0.20155314 0.254318232 0.021539262 0 0.402688121 0.244607025  
0.168164086 0.880252491 0.082946869 0 0.156560334 1.185509642 0.08592106  
1.573362135 0.343098414 1.146375337 0.51348062 0.613983944 0.099920553 0  
1.675389659 0.117848011 0.072532016 0 0.075274646 0.157035335 0.119370033  
0.388459252 0.042705319 0 0.037769152 0 0.137950017 0.208570465  
0.130178185 0.206374986 0.883383141 0.336096406 0.290314043 0.108372794 0  
0.080320991 0.836896771 0.275473592 0 0.344507764 0.68950506 1.050301268  
0.266688203 0.189711973 0.653520789 0.3236951 0.053647229 0.21118961 0  
0.208469657 0.031808534 0 0.137803106 0.252893387 0.116259763 0.13854081  
0.153574061 0.286911566 0.306664572 0.183698348 0.156560334 0.042999465  
0.201788875 0.236991055 0 0.164627374 0 0.383739965 0.261725559  
0.807801941 0 0.303429573 0.171904381 0.050388285 0.150988467 0.157994037  
0.03630671 0.197251702 0.178403066 0.2098209 0.054050592 0.13435002 0  
0.325220525 0.142351063 0.04321881 0.124300784 0.100178413 0.194289964 0  
1.885568178 0.141976208 0.519354269 0.119878744 0.0225352 0.285644848  
0.081690099 0.075274646 0 0.181175034 0.481003483 0.15537598 0 0  
0.081845108 1.060208186 1.315011343 0 0.164627374 0 0.054806064 0  
0.072925929 0.343488742 0 0.022313695 0.13265668 2.077071196 0.111022837  
0.11324135 1.610275224 0.15653848 0.036222861 0.077373792 0.299749477  
0.027127278 0.052664679 0.258681762 0.619495469 0.124660035 0.477199993 0  
2.148194312 2.774446803 0.154578443 0.024258927 0.063994617 0.537475041 0

|              |             |             |            |            |            |             |
|--------------|-------------|-------------|------------|------------|------------|-------------|
| 0.028909097  | 0.188035157 | 0.292657348 | 0.14829401 |            |            |             |
| TCGA-BT-A3PK | 303 1       | 0.06134823  | 0.0492035  | 0.08343202 | 0.1702383  |             |
| 0.1294521    | 44.470330   | 0.05343476  | 0.1839268  | 0.2519067  | 0          | 0.03031073  |
| 0.6829656    | 0.1233343   | 0.3980017   | 0.02486427 | 0.1740053  | 0.05446064 |             |
| 0.06834453   | 0.5512153   | 0.1142224   | 0.03775685 | 0.03151876 | 2.59415855 | 4.929       |
| 0.04942715   | 0.4451816   | 0.07061022  | 0.08258714 | 0          | 0.5991781  | 0.1016259   |
| 0.07671234   | 0.4118929   | 0.3900977   | 0.05515118 | 0.0817592  | 0.1550261  |             |
| 0.1129460    | 0.1358539   | 0.3138438   | 0.07290979 | 0.05961608 | 0.01980687 |             |
| 0.03547789   | 0.5398427   | 0.07297969  | 0.1155269  | 0.0142828  | 0.1235679  |             |
| 0.2998338    | 2.4811130   | 0.08160581  | 1.0834580  | 0.47455    | 0.2452776  | 0.1536354 0 |
| 0.1175565    | 0.2265411   | 0.1631096   | 0.05165783 | 0.06849747 | 0.01647572 |             |
| 0.02433894   | 0.07566993  | 0.02298937  | 0.3025492  | 1.6843510  | 0.0408029  |             |
| 0.1602740    | 0.06093     | 0.09543498  | 0.3584826  | 0.2353674  | 0.08699179 | 0.02982439  |
| 0.003201052  | 0.07848096  | 0.04211454  | 0.05202858 | 0.1704385  | 0.08745823 |             |
| 0.3601571    | 0.1407634   | 0.1636302   | 0.1413937  | 0.09752443 | 0.07922749 |             |
| 0.2788198    | 0.07604177  | 0           | 0.01778973 | 0.02397789 | 0.07511163 | 0.2383337   |
| 0.01977086   | 0           | 0.2658633   | 1.3989220  | 0.09372561 | 0.07868288 | 0 0.1481973 |
| 0.3302842    | 0.3146809   | 0.1792413   | 0.05962641 | 0.1978371  | 0.05202858 |             |
| 0.2968767    | 0.01514481  | 0.04512022  | 0.01934871 | 1.1330490  | 0.05081296 |             |
| 0.2051693    | 0.03529629  | 0.05165783  | 0.06768033 | 0.3494472  | 0.4326056  |             |
| 0.2219178    | 0           | 0.03630709  | 0.06907243 | 1.3481180  | 0.1114011  | 1.7308610   |
| 0.04942715   | 1.0380250   | 0.1132706   | 0.3482767  | 0.2687005  | 0.06041096 | 0.4014084   |
| 0.5050753    | 0.03250814  | 0.2416439   | 0.07590907 | 0.1319657  | 0.2808775  |             |
| 0.4525194    | 0.4306524   | 0.01675497  | 0.1142624  | 0          | 0.1391127  | 0.6940834   |
| 0.02187922   | 0.03468572  | 0.6401162   | 0.02824409 | 0.1882034  | 0.1912508  |             |
| 0.09831803   | 0           | 0.7790309   | 0.6469206  | 0.02809812 | 0.1215940  | 0.1738291   |
| 0.3177460    | 0.1277445   | 0.1673970   | 0.3501090  | 0.4080290  | 0.2163975  | 0.03131905  |
| 0.2134768    | 0.2627833   | 0.08019155  | 0.1171344  | 0.1852860  | 0.03542011 |             |
| 0.4884984    | 0.02328474  | 0.1050893   | 0.5786594  | 0.2473993  | 0.1667219  |             |
| 0.3552296    | 0.05321684  | 0.3624658   | 0.6691676  | 0.03904479 | 0.2324208  |             |
| 0.2589041    | 0           | 0.7126148   | 0.5895205  | 0.0305163  | 0.3088466  | 0.2022454   |
| 0.1355012    | 0.1712936   | 0.2788198   | 0.6041096  | 0.2983712  | 0.04843641 |             |
| 0.1458250    | 0.05450613  | 0.1021173   | 0.05743296 | 0.4202007  | 0.0358877  |             |
| 0.1307492    | 0           | 0.4798579   | 0.5094114  | 0.3309470  | 0.2772962  | 0.1503314   |
| 0.6153844    | 0.03022227  | 0.1022631   | 0.2832514  | 0.06178394 | 0          | 0.02861572  |
| 0.1474437    | 0.5610739   | 0.1410169   | 0.02411081 | 0          | 0.1444361  | 0.4824185   |
| 0.6251588    | 0.02971031  | 0.07114923  | 0.03932721 | 0.04145098 | 0.04214718 |             |
| 0.04345578   | 0.1237085   | 0           | 0.02250176 | 0.2197728  | 0.4456547  | 0.05597927  |
| 0.05075367   | 1.6818410   | 0.1275005   | 0.08675436 | 0.2252111  | 0.1034101  | 0           |
| 0.06638568   | 0.1049119   | 0.4880599   | 0.01571383 | 1.2768780  | 0.3234468  |             |
| 0.2548588    | 3.3612820   | 0.04022742  | 0.6727430  | 0.06453397 | 0.03387531 | 0.01886205  |
| 0.01457637   | 0.1750338   | 0.008048833 | 0.1014762  |            |            |             |
| TCGA-FD-A3N6 | 851 0       | 0.02016058  | 0.1832545  | 0.1462287  | 0.3636401  |             |

|              |            |            |             |             |             |            |            |  |
|--------------|------------|------------|-------------|-------------|-------------|------------|------------|--|
| 0.2702052    | 0.6726520  | 0.2560256  | 0.02501737  | 0.1431772   | 0.4019112   |            |            |  |
| 0.1317406    | 0.06005821 | 0          | 0.08286292  | 1.51252950  | 0.514660    | 0.1670710  | 0.6177026  |  |
| 0.5104948    | 0.03618697 | 0          | 0.4521525   | 0.03339686  | 0.1008385   | 0.04331471 |            |  |
| 0.7264440    | 0.1288823  | 0.08597807 | 0.02911172  | 0.2355005   | 0.04836546  |            |            |  |
| 0.5297493    | 0.09812192 | 0.1097116  | 0           | 0.1165893   | 3.7798340   | 0.09593191 |            |  |
| 0.7403191    | 0.01251651 | 0.3248603  | 1.10357     | 4.8985520   | 0.5363547   | 1.916205   |            |  |
| 0.1069366    | 0          | 0.2917113  | 1.8093490   | 0.01078103  | 0.5294020   | 0.237665   |            |  |
| 0.2926301    | 0          | 0          | 0.06720827  | 0.09065869  | 0.2105478   | 0          | 0.01340887 |  |
| 0.04321649   | 0.1121296  | 0.1771051  | 0.9948104   | 0.06187816  | 0.1334093   | 0          |            |  |
| 0.008415575  | 0.4699663  | 0.06643154 | 0.2507694   | 0.07468053  | 0.1916066   |            |            |  |
| 0.2731310    | 0.2737537  | 0.2595057  | 0.0640980   | 0.07810849  | 0.6963672   | 0          |            |  |
| 0.03028359   | 0.05846157 | 0.6461389  | 0.004113931 | 0.3880523   | 0.07796648  | 0          |            |  |
| 0.1736535    | 0.2472450  | 0.07107834 | 0           | 0.5282511   | 0.02435069  | 1.135493   |            |  |
| 0.04596095   | 0.2356130  | 0.1485076  | 0.3993734   | 0.2051749   | 0.9529236   |            |            |  |
| 0.1791709    | 0.0296553  | 0.1271695  | 1.2797230   | 0.03339686  | 0.2022715   |            |            |  |
| 0.01784501   | 0.2037129  | 0.2668977  | 0.3242462   | 0.1569503   | 0.2083652   | 0          |            |  |
| 0.04772572   | 0.2412574  | 1.4878980  | 0.08135375  | 0.5266711   | 0           | 0.3957324  |            |  |
| 0.6168479    | 0.1017356  | 0.4415090  | 0.9686744   | 0.2343255   | 0.1041593   | 0          |            |  |
| 0.1496739    | 0.1387753  | 0.3955864  | 1.2695780   | 0.04404886  | 0           | 0          | 0          |  |
| 0.2764769    | 0.2588424  | 0.09118886 | 0.6836648   | 0           | 0.1924173   | 0.8260267  |            |  |
| 0.07754351   | 0          | 0.3413458  | 0.5177301   | 0           | 0.1826691   | 0.7870506  |            |  |
| 0.1392259    | 0.2238938  | 0.04939755 | 0.6226489   | 0.6972612   | 0.1066706   |            |            |  |
| 0.4775596    | 0          | 0.2210746  | 0.1475767   | 0.1026489   | 0.2587812   | 0.01862391 |            |  |
| 0.1797969    | 0.06121565 | 0.1235989  | 0.4437117   | 0.2591491   | 0.2191562   |            |            |  |
| 0.2075333    | 0.07254448 | 0.1379232  | 0           | 0.02566222  | 0.6765030   | 0.1944742  |            |  |
| 0.3306408    | 0.1040815  | 0.7749256  | 0           | 0.6108485   | 0.3590727   | 0.077926   |            |  |
| 0.2752026    | 0.07853766 | 0.1684461  | 0.02178941  | 0.1318873   | 0.2480658   |            |            |  |
| 0.1432968    | 0.08372969 | 0          | 0.09430441  | 0           | 0.2005150   | 0.2059633  | 0.0811522  |  |
| 0.5408485    | 0.2485888  | 1.01541    | 0.4046318   | 5.0600760   | 0.06356355  | 0.01493611 |            |  |
| 0.0399681    | 0.2977886  | 0.09978258 | 0           | 0.02317353  | 0.5472015   | 0.08238533 |            |  |
| 0.09508107   | 0.1635452  | 0.1627384  | 0.4856026   | 0.9945310   | 0.03117525  |            |            |  |
| 0.02584784   | 0.1634621  | 0.2216101  | 0.1406097   | 0.1300920   | 0.6433344   |            |            |  |
| 0.7347895    | 1.3180810  | 0.1839621  | 0.08339471  | 2.4394840   | 0.1995234   | 0.03601223 |            |  |
| 0.4335709    | 0.3555165  | 0.01797969 | 0.1047169   | 0.2758136   | 0.718542    |            |            |  |
| 0.1032793    | 1.9767710  | 0.4746006  | 1.0811910   | 0.1553321   | 0.09647146  | 0.16966    |            |  |
| 0.04452914   | 0.01859565 | 0.05748199 | 0.2684292   | 0.007053469 | 0.0982878   |            |            |  |
| TCGA-UY-A78P | 2380       | 0          | 0.04583767  | 0.01633932  | 0.05541161  | 0.1413303  |            |  |
| 0.07034396   | 29.490020  | 0.05323326 | 0.3442563   | 0.6413341   | 0.1051745   |            |            |  |
| 0.04529465   | 0.5662308  | 0.04095641 | 0.8496447   | 0.02477051  | 0.05958878  |            |            |  |
| 0.1446807    | 0.2365121  | 0.09984304 | 0.01820667  | 0.05015264  | 0.1255996   |            |            |  |
| 1.38454826   | 7.91540    | 0.03517198 | 0.1971124   | 0.6330956   | 0.05485048  | 0          |            |  |
| 0.7074592    | 0.3037281  | 0.1528461  | 0.06565436  | 0.2266989   | 0.04883841  |            |            |  |
| 0.01629018   | 0.04412615 | 0.07760007 | 0.1071455   | 0.03552958  | 0.05361144  |            |            |  |
| 0.07126954   | 0.03946437 | 0          | 5.2024590   | 0.1150913   | 0.009485963 | 0.1231019  |            |  |

|              |            |             |            |            |            |            |
|--------------|------------|-------------|------------|------------|------------|------------|
| 0.07965419   | 2.3324580  | 0.2747492   | 0.1080595  | 0          | 0.3174497  | 0.3526102  |
| 0.05174769   | 0.9529001  | 0           | 0.05146304 | 0.3753155  | 0.06565436 | 0.04188146 |
| 0.08964654   | 0.04580537 | 0.3900578   | 0.5922352  | 0.02709936 | 0.1228228  |            |
| 0.07284029   | 0.1118531  | 0.1984060   | 0.8441275  | 0.1155517  | 0.2020411  |            |
| 0.03188981   | 0.0347489  | 0.1678229   | 0          | 0.1131972  | 0          | 0.1103997  |
| 0.0889163    | 0.1435182  | 0.3886267   | 0          | 0          | 0          | 0.1377072  |
| 0.04777495   | 0.0935355  | 0.2428312   | 0          | 0.4284225  | 0.2467647  | 0.4216075  |
| 0.03232114   | 0.03135447 | 0           | 0.03690961 | 0.1518641  | 0.2438289  | 0.03968121 |
| 0.05002237   | 0.3801042  | 0.1036648   | 0.2476107  | 0.0301754  | 0          | 0.07710298 |
| 1.6986450    | 0.1518641  | 0.5620880   | 0.1029261  | 0.3146506  | 0.1228692  |            |
| 0.3620184    | 0.4421620  | 0           | 0.08257436 | 0.7602084  | 0.01233121 | 1.1814880  |
| 0.9501342    | 0.03224098 | 0.1156545   | 0.05855659 | 0          | 0.5968578  | 0          |
| 0.08501209   | 0.1203663  | 0.07562282  | 0          | 0.1598962  | 0.2825992  | 0          |
| 0.2276631    | 0.04659342 | 0.09239206  | 0.2095352  | 0          | 0.1036648  | 0.2231958  |
| 0            | 0.1249958  | 0.05443703  | 0.1567157  | 0.08069251 | 1.4875120  | 0.5989883  |
| 0.02799217   | 0.03461013 | 0.1154491   | 0.2110319  | 0.2500603  | 0.3539519  | 0          |
| 0.1219471    | 0          | 0.0624019   | 0.2392558  | 0.4398112  | 0.1917340  | 0.07779511 |
| 0.1153671    | 0.04234385 | 0.8370488   | 0          | 0.1102031  | 0.1441193  | 0.3234872  |
| 0.1107288    | 0          | 0.07068822  | 0.4624601  | 0.1428523  | 0.07779511 | 0.06615554 |
| 1.7686480    | 0.1051745  | 0.3203441   | 0.06080245 | 0.1310497  | 0.130833   |            |
| 0.2362330    | 0.05056228 | 0.03968121  | 1.0942390  | 0.09908204 | 0.01378679 | 0.1652149  |
| 0.1086012    | 0.07856547 | 0.03814426  | 0.2246233  | 0.07150475 | 0.04341871 | 0          |
| 0.4361144    | 0.1171132  | 0.5651984   | 0.1973218  | 0.09984304 | 1.056557   |            |
| 0.06021662   | 0.0679183  | 0.8545212   | 0.6155096  | 0          | 0.05701563 | 0.05428459 |
| 0.3678305    | 0.03121893 | 0.1441193   | 0          | 0.1644474  | 0.02597834 | 0.6180832  |
| 0.05919655   | 0.04725396 | 0           | 0.02752978 | 0          | 0.02664118 | 0.02464839 |
| 0.0224169    | 0.05711583 | 0.1331922   | 0          | 0.03792171 | 0.5777584  | 0.1088741  |
| 0.05913441   | 0.06006539 | 0.1901911   | 0          | 0          | 0.1468877  | 0          |
| 0.09392748   |            |             |            |            |            |            |
| 0.6700806    | 0.0306883  | 0.2962143   | 0.6776610  | 0.02504733 | 0.3411959  | 0          |
| 0.06749514   | 0.09395463 | 0.05808563  | 0.1889049  | 0.03207393 | 0.02128285 |            |
| TCGA-CF-A9FL | 565        | 1           | 0.2548853  | 0.0170356  | 0.05777291 | 0.1915588  |
| 0.09778878   | 48.139280  | 0.05550174  | 0.04631309 | 0.7849532  | 0          | 0.01574161 |
| 0.7554070    | 0.1708069  | 1.4764190   | 0.07747823 | 0.03953606 | 0.03771153 | 0.1419765  |
| 0.2775940    | 0.07593011 | 0.2614492   | 0.3273798  | 2.53071189 | 0.093930   | 0.07334158 |
| 0            |            |             |            |            |            |            |
| 0.07334158   | 0          | 0.1008447   | 0.9681089  | 0.1055570  | 0.1195196  | 0.06845215 |
| 0.2701251    | 0.1527588  | 0.1188906   | 0.6900980  | 0.1779952  | 0.1469886  |            |
| 0.07408727   | 0.04688054 | 0.02476887  | 0.3703149  | 0          | 13.960910  | 0.3032108  |
| 0.08999684   | 0.03956078 | 1.15513     | 0.8304856  | 4.2017010  | 0.08476251 | 0.6956821  |
| 0.07041524   | 0          | 1.1938831   | 0.2663030  | 0.05253304 | 0.8366373  | 0.05647302 |
| 0.05365608   | 1.1383540  | 0.06845215  | 0.03906975 | 0.1402001  | 0.04775731 |            |
| 0.6285050    | 0.5145605  | 0.007063542 | 0.1792794  | 0.2193946  | 0.1749293  |            |
| 0.6619548    | 7.8719970  | 0.1204758   | 0.04956491 | 0.08644678 | 0.3622968  |            |
| 0.01749745   | 0.03602744 | 0.1180209   | 0.3028044  | 0.08632818 | 0.02436808 |            |
| 0.1236072    | 0.2327642  | 0.1012969   | 0.0411461  | 0.5212894  | 0          | 0          |

|              |            |            |             |            |             |
|--------------|------------|------------|-------------|------------|-------------|
| 0.02771682   | 0.1743379  | 0.05526213 | 0.5007321   | 0.08214257 | 0.191434    |
| 0.4836869    | 0.7814645  | 0.1123282  | 1.0460990   | 0.1539299  | 2.586148    |
| 1.1621460    | 0.2068609  | 0.3064048  | 0.3669462   | 0.1441098  | 0.6597483   |
| 0.09438388   | 0          | 0.04019432 | 1.3939720   | 0.05277852 | 0.3729350   |
| 0.09373115   | 0.2562103  | 0.3486876  | 0.3951465   | 0          | 0.07542307  |
| 0.7001333    | 0.1414236  | 0.3495751  | 0           | 0.3702329  | 0.06722979  |
| 0.5320238    | 0          | 1.3317050  | 0.5554723   | 0.2279180  | 0.3548043   |
| 0.2917425    | 1.2627510  | 0.0447311  | 0.03480618  | 0          | 0           |
| 0.1363534    | 0.03602744 | 0.3823045  | 0.4107129   | 0.3040855  | 0           |
| 0            | 0.5394438  | 1.0039650  | 0.1804250   | 0.7334158  | 0.3398624   |
| 0.3422607    | 0.3814313  | 0          | 0.1040977   | 0.1385841  | 0.4148815   |
| 0.2433308    | 0.05613222 | 0.02943219 | 0.2029578   | 0.0483709  | 0.1378792   |
| 0.3005216    | 0.1927270  | 0.1539299  | 0.4509642   | 0.1678734  | 3.6922130   |
| 0.2027757    | 0.1379494  | 0.3073362  | 0.4019432   | 0.05482817 | 0.4341937   |
| 0.5613886    | 0.4692444  | 0.2990783  | 0.2504055   | 0.04137218 | 0.05704345  |
| 0.2754781    | 0.1437430  | 0.2851123  | 0.05661456  | 0.06301034 | 0           |
| 0.07455184   | 0.04526895 | 0.1301972  | 0.6470715   | 0.2849089  | 1.227674    |
| 0.2468766    | 0.04461331 | 0.2039965  | 0.1130088   | 0.1888335  | 0.5784433   |
| 0.08556518   | 0.0394227  | 0          | 0.2363793   | 0.3910249  | 0.1627465   |
| 0            | 0          | 0.4062807  | 0.7772419   | 0          | 0.02463381  |
| 0.1111058    | 0.02569876 | 0          | 0           | 0.05954976 | 0.4166042   |
| 0.3011894    | 0.07567574 | 0.01897057 | 0.1805074   | 0.4792151  | 0.1704846   |
| 0.0551629    | 0.3180749  | 0.04055513 | 0.06528673  | 0.6702355  | 0.03199605  |
| 1.7206623    | 0.7536560  | 0.08878995 | 0.05081937  | 0.06703029 | 0.1407427   |
| 0.03028044   | 0.5302631  | 0.03901418 | 0.110949    |            |             |
| TCGA-CF-A9FM | 398        | 0          | 0.1145370   | 0.06999071 | 0.1186799   |
| 56.158370    | 0.2021695  | 0.2687481  | 0.2252614   | 0.01616859 | 0.1662636   |
| 0.3508797    | 0.6369155  | 0.08842196 | 0.07251507  | 0.1162033  | 0.007675131 |
| 0.1425617    | 0.1754767  | 0.2148326  | 0           | 1.99665960 | 0.940990    |
| 0.1407243    | 0          | 0.05873904 | 0           | 1.1127450  | 0.0409205   |
| 0.5895855    | 0.05230075 | 0.1918956  | 0.2835265   | 0.1329623  | 0.04831217  |
| 0.05326778   | 0.1055643  | 0.2035256  | 0.1267865   | 0          | 11.377640   |
| 0.1540632    | 0.02031692 | 0.5932310  | 0.1279518   | 5.3425480  | 0.1305924   |
| 0.2314406    | 0.08722527 | 0.8863110  | 0.08391292  | 0.02624982 | 1.0741630   |
| 0.2204458    | 0.2923077  | 0          | 0.009442231 | 0.1701852  | 0.1962108   |
| 0.2114070    | 0.02902054 | 0.0789181  | 0.1993441   | 0.3114352  | 0.6799098   |
| 7.0811060    | 0.1237436  | 0.05090932 | 0.01366024  | 0.3535177  | 0.03594411  |
| 0.1850233    | 0.2424443  | 0.2488142  | 0.3546791   | 0          | 0.1269599   |
| 0.1040445    | 0.2535729  | 0.3569526  | 0           | 0.1474698  | 0.1992803   |
| 0.01335555   | 0.3582862  | 0          | 0.1310843   | 0.2008367  | 0.95316     |
| 0.03952627   | 1.0299920  | 0.8579489  | 0.04249436  | 0.3214119  | 0.6331908   |
| 0.03700466   | 0.42721    | 0.09694396 | 0           | 0.04128456 | 1.6078220   |
| 0.2736076    | 0.02317296 | 0          | 0.1925471   | 0.08771993 | 0.1107667   |
| 0            | 0.03873443 | 0.2189655  | 1.4246790   | 0.0660271  | 0.5471345   |
|              |            |            |             | 0          | 1.5262390   |

|              |            |            |            |            |            |            |
|--------------|------------|------------|------------|------------|------------|------------|
| 0.04128456   | 0.2329150  | 1.4317440  | 0.2535729  | 0.2861224  | 0          | 0.5263961  |
| 0.2815767    | 0.7705435  | 2.3922480  | 0          | 0          | 0          | 0.3462973  |
| 0.1400518    | 0.03700466 | 0.5577111  | 0.1807942  | 0.3569526  | 0.1165926  |            |
| 0.1678258    | 0          | 0.8311136  | 1.2098290  | 0.02997664 | 0.2223826  | 0.08242246 |
| 0.7533092    | 0.4638472  | 0.1093399  | 0.4833734  | 0.4788389  | 0.1154324  |            |
| 0.1069213    | 0.02846862 | 0.5270615  | 0.1026634  | 0.2499309  | 0.03294558 |            |
| 0.04534578   | 0.1876166  | 0.09936583 | 0.07080953 | 0.9774646  | 0.3794129  |            |
| 0.2766839    | 0.0842175  | 0.07990511 | 0.8819444  | 0.6119188  | 0.08331031 |            |
| 0.1062683    | 0.2367543  | 0.3715610  | 0.1689460  | 0.3945127  | 0.02170432 | 0.3447491  |
| 0.8574623    | 0.1264902  | 0.1895139  | 0.08498872 | 0.7616793  | 0.2122127  |            |
| 0.1919344    | 0.4270667  | 0.05815018 | 0.08844991 | 0          | 0.3280196  | 0.153148   |
| 0.09299367   | 0.3343216  | 0.7843746  | 0.4598579  | 0.5548286  | 0.5916701  |            |
| 0.3207639    | 0.4190594  | 0.02579424 | 0.0727333  | 0.8331522  | 0.04394303 |            |
| 0.04049201   | 0.1221154  | 0.04787427 | 0.3707364  | 0.06686433 | 0          | 0.05309364 |
| 0            | 0.8253282  | 0.2677922  | 0          | 0.1518119  | 0          | 0.08844443 |
| 0.08558963   | 0.05279163 | 0          | 0.02400613 | 0          | 1.0935330  | 0.05414684 |
| 0.1165926    | 0.0292277  | 0.3178345  | 0.4582677  | 0.2042937  | 0          | 0.2904022  |
| 0.04165516   | 0.2347015  | 0.7117512  | 0.03286391 | 1.4048049  | 0.5350360  | 0.1823966  |
| 0.0521978    | 0          | 0.1445603  | 0          | 0.06220354 | 0.9025563  | 0.04579703 |
| 0.09116669   |            |            |            |            |            |            |
| TCGA-ZF-A9RD | 408        | 1          | 0.05604295 | 0          | 0          | 0.1814358  |
|              | 0.1018310  | 0.3068297  | 0          | 0.05537902 | 0.7090452  | 0.07511238 |
|              | 0.0454281  | 0.0745114  | 0.06633464 | 0          | 0.1220720  | 0.01669515 |
|              | 0.3455169  | 1.228444   | 38.880890  | 0.09030556 | 0.5422442  | 0.3870238  |
|              | 0          | 0.6081803  | 0.1856750  | 0.07007839 | 0.1204074  | 0.1781814  |
|              | 0.02987553 | 0.3237022  | 0.2703992  | 0.09307913 | 0.2997351  | 0.06343303 |
|              | 0          | 0.5833769  | 1.9726320  | 0.08889138 | 0.2638410  | 0.01739687 |
|              | 0.2921651  | 4.7885710  | 0.2879308  | 0.0495442  | 0          | 0.4990198  |
|              | 0.03995922 | 0.2759337  | 0          | 0          | 0.1251479  | 0.1204074  |
|              | 0.05231167 | 0          | 0.3901910  | 0.3620451  | 0          | 0.1802016  |
|              | 0.1455474  | 0.2580159  | 0.05297926 | 0.08718475 | 0.05848462 | 0.03186403 |
|              | 0.06337233 | 0.0415198  | 0          | 0          | 0          | 0.1630689  |
|              | 0.1018832  | 0          | 0          | 0          | 0          | 0.0571801  |
|              | 1.1766470  | 0.8161670  | 0.05927566 | 0          | 0          | 0.3384536  |
|              | 0.07277371 | 0.04586949 | 0.1549101  | 0          | 0.07568466 | 0          |
|              | 1.4872780  | 0.3748533  | 0.02976363 | 0          | 0.1648732  | 0.2253371  |
|              | 0.1158439  | 0.3056496  | 0.06633464 | 0.07211334 | 1.06888    | 0          |
|              | 1.13527    | 0.05912864 | 0.6363168  | 0.04602446 | 0          | 0.3502761  |
|              | 0          | 0.1386892  | 0          | 0.07331079 | 0.7897530  | 0.06122411 |
|              | 0.7685580  | 0.1901170  | 0.2826340  | 0.3096191  | 0.1528248  | 0          |
|              | 0.07399339 | 1.3047130  | 0.3337276  | 0          | 0          | 0          |
|              | 0.07525464 | 0.4472921  | 0.09884191 | 0.04577701 | 0          | 0.3456839  |
|              | 0          | 0.1269471  | 0.0776569  | 0.1428013  | 0          | 0.06063242 |
|              | 0.1353814  | 0          | 0.0432131  | 0.3834026  | 0.4366423  | 0.2140096  |

|              |            |            |             |            |            |            |
|--------------|------------|------------|-------------|------------|------------|------------|
| 0.6757559    | 0          | 0.2893285  | 0.2447908   | 0          | 0.1462938  | 0.2207469  |
| 0.1856750    | 0.09272917 | 0.07277371 | 0.2341255   | 0          | 0          | 0.1776191  |
| 0.04433411   | 0          | 0.11235    | 0           | 0          | 0.1145085  | 0.3247116  |
| 0.2591377    | 0.6513844  | 0.05231659 | 1.0286460   | 0.02208696 | 0.2075990  | 0.3567037  |
| 0.3762732    | 0          | 0          | 0.3455169   | 0.1058174  | 0          | 0.08810299 |
| 0.1111675    | 0.5235048  | 0.1085641  | 0.1299927   | 0          | 0.0504885  | 0.1540095  |
| 0.02442942   | 0.04520415 | 0          | 0.3083377   | 0          | 0          | 0.02318229 |
| 0.06655686   | 0.02502695 | 0.1036776  | 0.1744014   | 0.04998044 | 0          | 0.124332   |
| 0.4993557    | 0.1148394  | 0.4695799  | 0.1688433   | 0.6984571  | 1.75125    |            |
| 0.09187156   | 0.4916523  | 0          | 0           | 0.05169269 | 0.05326334 | 0.6928878  |
| 0.07806375   |            |            |             |            |            |            |
| TCGA-G2-AA3D | 2139       | 0          | 0.1154153   | 0.2821096  | 0.1793849  | 0.2745186  |
| 0.02530285   | 35.835870  | 0.1078516  | 0.7522469   | 0.1134943  | 0.3095588  |            |
| 0.1905342    | 0.0330291  | 0.2530370  | 0.14256     | 0.1812164  | 0.03903144 | 0.2010836  |
| 0.1077412    | 0.2062926  | 0.05411998 | 0.2710705   | 3.09619824 | 4.10060    | 0.07590855 |
| 0.1063525    | 0.07590855 | 0.1775683  | 0           | 3.14912    | 0.05462578 | 0.1237028  |
| 0.8736858    | 0.1054036  | 0.1933670  | 0.9047186   | 0.2930853  | 0.03651197 |            |
| 0.03067213   | 0.07651446 | 0.2307220  | 0.4684484   | 0          | 15.586560  | 0.2615194  |
| 0.2794402    | 0.01023635 | 1.12914    | 1.4182624   | 5.794830   | 0.2193231  | 0.3129980  |
| 0            | 1.85962    | 0.2959472  | 0.01469506  | 0.9200397  | 0.1168992  | 0.05553404 |
| 1.5095640    | 0.03542399 | 0.04519451 | 0.3253917   | 0.3460018  | 0.3443838  |            |
| 0.05325702   | 0.0219323  | 0.3446007  | 0.1484711   | 0.4465946  | 2.269471   |            |
| 9.4632660    | 0.1246924  | 0.07694953 | 0.006882494 | 0.1499909  | 0.03621973 |            |
| 0.03728841   | 0.3908854  | 0.1253610  | 0.1786994   | 0          | 0.1279334  | 0.08030364 |
| 0.1703449    | 0.2397932  | 0          | 0.09906709  | 0.2199330  | 0.3351023  | 0.01345796 |
| 1.10057      | 0.08501757 | 0.1981342  | 0.1384683   | 0.8088158  | 0          | 0.1015043  |
| 0.05082572   | 0          | 3.3867980  | 0.9021157   | 0          | 0.1282011  | 0.7140040  |
| 0.9648820    | 0.09768732 | 0          | 0           | 2.2824010  | 1.2682460  | 0.05253895 |
| 0.4419628    | 0.0334848  | 0.8179533  | 0.08992243  | 0          | 0.2673193  | 2.064535   |
| 0.1596801    | 0.3101231  | 0.1062720  | 0.4971127   | 0.03479142 | 0.04160113 |            |
| 0.3430246    | 0          | 1.8420471  | 0.9802590   | 0.1354213  | 0.04329599 | 0.1224075  |
| 0.05674717   | 0.7333158  | 1.0600790  | 0           | 0          | 0          | 0.3489527  |
| 0.09408383   | 0.03728841 | 0.2637901  | 0.1214537   | 0.3147285  | 0.3524598  |            |
| 0.2959472    | 0.08707573 | 0.2093716  | 1.2968340   | 0.60413    | 0.1867399  | 0.2491634  |
| 1.7458970    | 0.9589008  | 0.05141653 | 0.6641998   | 1.62299    | 0.05815879 | 0.3501588  |
| 0.02868691   | 0.7571043  | 0.06896706 | 0.2098728   | 0.09129505 | 0.1370805  |            |
| 0.08402456   | 0          | 0.2616258  | 0.15552     | 0.8311352  | 0.2389761  | 0.2970215  |
| 0.1949379    | 1.2920430  | 0.2569212  | 0.1259237   | 0          | 0          | 0.7488203  |
| 0.8296441    | 0.02187075 | 0.6640426  | 0.1750664   | 0.1456687  | 0.2591697  |            |
| 0.08564041   | 0.3542399  | 0.2138399  | 0.2157223   | 0.3934550  | 0.1891256  | 0          |
| 0.7271767    | 0          | 0          | 0.3368852   | 0.1749717  | 0.4633841  | 0.7623858  |
| 0.2981035    | 0.1693075  | 0.4222727  | 0.1429562   | 0.2198730  | 0.7707259  | 0          |
| 0.2448150    | 0.1230518  | 0.02067487 | 0.1712238   | 0.03368852 | 0          | 0          |
| 0.8223123    | 2.1205790  | 0.12748    | 0.08455636  | 0.08912261 | 0.2718585  |            |

|                           |                    |                    |                   |                    |                   |
|---------------------------|--------------------|--------------------|-------------------|--------------------|-------------------|
| 0.1149946                 | 0.2127857          | 0.1840932          | 0                 | 0.5855230.9581899  | 0.06017975        |
| 0.2728102                 | 0.4987698          | 0.0783244          | 0.1178073         | 0.1486976          | 0.9919753         |
| 0.05881719                | 0.0285468          | 0.8047296          | 0.04197456        | 0.2702871          | 0.8112690         |
| 2.1005323.5647630.1081148 | 0.05259805         | 0.06937636         | 0.2185031         | 0.0101387          |                   |
| 0                         | 0.9094771          | 0.005768525        | 0.2411476         |                    |                   |
| TCGA-DK-A2I2              | 237                | 1                  | 0.05527253        | 0.1477686          | 0                 |
| 79.057830.1444283         | 0.1606898          | 0.2017412          | 0.09511705        | 0.02730887         |                   |
| 0.6442352                 | 0.07407982         | 1.0501420.01493454 | 0.2057639         | 0.09813412         |                   |
| 0.2398221                 | 0.3611818          | 0.01646564         | 0.06803511        | 0                  | 1.23029252.57654  |
| 0.1526814                 | 0.3713820.1272345  | 0                  | 0                 | 0.7197837          | 0.1831225         |
| 0.02968805                | 0.1757319          | 0.07729433         | 0.02946483        | 0.1995327          | 0.133341          |
| 0.08159963                | 0.4884069          | 0.09853361         | 0.02148477        | 0.2141433          | 0.6712502         |
| 1.0323140.0876694         | 0.1561284          | 0.02573657         | 0.4453207         | 0.1440744          | 6.24035           |
| 0.03676194                | 0.4259590.4275523  | 0                  | 0.3281065         | 0.2834591          | 0.07635669        |
| 1.0432050.09797056        | 0.04654183         | 0.3394256          | 0.02968805        | 0.0239220.07738882 |                   |
| 0                         | 0.09620677         | 0.4017016          | 0.06126989        | 0.1110777          | 0.05855543        |
| 0.6459597                 | 0.9754644          | 0.05225097         | 0.07523795        | 0.02307225         | 0.141417          |
| 0.01517747                | 0.03125058         | 0.1637961          | 0                 | 0.1996852          | 0.9723076         |
| 0.1394085                 | 0.08786597         | 0                  | 0.2512066         | 0                  | 0                 |
| 0.01973792                | 0.1561673          | 0                  | 0.0553506         | 0.1458028          | 5.2745230.1883737 |
| 0.02835617                | 0                  | 0.03338009         | 0.6409289         | 0.3150179          | 0.2153199         |
| 0.2291709                 | 0.03125058         | 0.5225097          | 0.1091594         | 0.08130337         | 0                 |
| 0.04578064                | 0.2772752          | 0.01956965         | 0.1396255         | 0.2439101          | 0.07407982        |
| 1.9955810.3427541         | 0                  | 0                  | 0.0853464         | 0.6531371          | 0.01115203        |
| 2.1264930.0291579         | 0.03486497         | 0.1361753          | 0.1632843         | 0.6801262          |                   |
| 0.05353582                | 0.03294974         | 0                  | 0.1367826         | 0.04755852         | 0.72303           |
| 0.1509562                 | 0.06863086         | 0                  | 0.2506709         | 0.7579927          | 0.07884954        |
| 0.5046313                 | 0                  | 0.07536197         | 0.09846287        | 0.07086478         | 0                 |
| 0.2742833                 | 0                  | 0.1878030.1044091  | 0.3817035         | 0.05249865         | 0.1846759         |
| 0.1855503                 | 0.3308574          | 0                  | 0.03386079        | 0.07212557         | 0.5019275         |
| 0.1407118                 | 0.0834680.02552979 | 1.0210770.04195741 | 0.0697654         | 0.4779052          |                   |
| 0.3204156                 | 0.06676018         | 0.0355610.02486112 | 0.3781320.9904716 | 0.1055338          |                   |
| 0.02991467                | 0.6664664          | 0.06972994         | 0.2853511         | 0.6856491          | 0.01832938        |
| 0.5797075                 | 0.3455             | 0.2899440.05715902 | 0.1435466         | 1.1050550.2090835  |                   |
| 0.04987365                | 0.1597206          | 0                  | 0.1439270         | 0.1292731          | 0                 |
| 0.3151913                 | 0.1765235          | 0.3407672          | 0.0713811         | 0.1160941          | 0.6252185         |
| 0.03267501                | 0.06142355         | 0.08362461         | 0.2226604         | 0.03419566         | 0                 |
| 0.1826349                 | 0.2258687          | 0.04344592         | 0.04483778        | 0.07436096         | 0.2349414         |
| 0.3498949                 | 0.1070716          | 0.06410287         | 0                 | 0.07469166         | 0                 |
| 0.1337482                 | 0                  | 0                  | 0.1721802         | 0.4416706          | 0.02521765        |
| 0.7837645                 | 0.1203435          | 0.0246829          | 0.08308006        | 0.02866732         | 0.04929336        |
| 0.1634972                 | 0.3166014          | 0.05663038         | 1.0642010.0832611 | 1.45425            | 3.19761           |
| 0.04077387                | 0.2644874          | 0                  | 0.3662451         | 0.01699403         | 0.02626557        |
| 0.004834471               | 0.06736679         |                    |                   |                    |                   |



|              |             |            |            |            |            |            |            |          |
|--------------|-------------|------------|------------|------------|------------|------------|------------|----------|
| TCGA-FD-A62S | 406         | 1          | 0          | 0.1231889  | 0.0464190  | 0.2249490  | 0.1767841  | 28.41019 |
| 0.1337825    | 0.1767538   | 0.09343541 | 0.1762119  | 0.07588779 | 1.372012   |            |            |          |
| 0.2401679    | 0.4033295   | 0.2005888  | 0.2246322  | 0.1515011  | 0.1681096  |            |            |          |
| 1.6727950    | 0.09913772  | 0.08402699 | 0.3156492  | 1.07886617 | 0.864910   | 0.1060704  |            |          |
| 0.2889662    | 0.4714241   | 0.09189787 | 0.9723123  | 0.6852487  | 0.5088737  |            |            |          |
| 0.1600514    | 0.6049943   | 0.7325043  | 0.1994487  | 0.08187893 | 0.4435803  |            |            |          |
| 0.2275229    | 0.1606180   | 0.4643118  | 0.1216943  | 0.1293573  | 0.1322392  |            |            |          |
| 0.08882461   | 2.3353880   | 0.1218109  | 0.1205168  | 0.2145558  | 0.1546860  | 0.100091   |            |          |
| 2.1927430    | 0.2724177   | 0.9864038  | 0.6789213  | 0          | 0.1804536  | 0          | 0.2030591  |          |
| 0.3781214    | 0           | 0          | 0.2858241  | 0.05499948 | 0.1680369  | 0.10582    | 0.07674346 |          |
| 0.3267563    | 0.7028408   | 0.03972758 | 0.1714836  | 0.1627179  | 0.1592912  |            |            |          |
| 0.9307605    | 0.7464216   | 0.07259932 | 0.1692524  | 0.06945769 | 0.1601027  |            |            |          |
| 0.3233509    | 0.0289471   | 0.2086187  | 0.3406134  | 0.4161744  | 1.194325   |            |            |          |
| 0.2482877    | 0.1424913   | 0          | 0.0661196  | 0.2326901  | 0.5711485  | 0.07690606 |            |          |
| 0.08907892   | 0.02001084  | 0.1044745  | 0.5062966  | 0.2309978  | 0.0512707  |            |            |          |
| 0.5264415    | 0.6867503   | 0.6979546  | 0          | 0          | 0.7729910  | 0.8057167  | 0.6127756  |          |
| 0.2991730    | 0.1204751   | 0.2948315  | 0.05789419 | 0.6107562  | 0          | 0.07531049 |            |          |
| 0.1291803    | 1.2852690   | 0.04240614 | 0.1712248  | 0.0634451  | 0          | 0.451863   |            |          |
| 0.2401679    | 2.4607980   | 0.3174897  | 0.2792281  | 0.06060043 | 0.1383472  |            |            |          |
| 1.3373560    | 0.1342901   | 1.6183710  | 0.08249922 | 0.9527153  | 0.1350434  | 1.194918   |            |          |
| 0.03503828   | 0           | 1.7199840  | 0.0495897  | 0.06443325 | 0.1680540  | 0.2534008  | 0          |          |
| 0.5692751    | 0.6425716   | 0.03594026 | 0.08389752 | 0.1907162  | 0.1170957  |            |            |          |
| 0.5804849    | 0.9478634   | 0.03651877 | 0.2315768  | 0.5698254  | 0.1885697  |            |            |          |
| 0.5235528    | 0.1368078   | 0.0984620  | 0.6501431  | 0.6034064  | 0.02344939 |            |            |          |
| 0.17396      | 0.2256640   | 0.3535681  | 0.3029959  | 1.5281670  | 0.2062481  | 0.6129398  |            |          |
| 0.04514883   | 0.06272982  | 0.02226973 | 0.4473858  | 0.2141573  | 0.1955098  |            |            |          |
| 0.3543630    | 0.02364799  | 1.9731620  | 0.03886473 | 0.2123327  | 0.3621917  | 0.5355264  |            |          |
| 0.1545982    | 0.2305786   | 0.1217226  | 0.5837664  | 0.2792281  | 0.1303399  |            |            |          |
| 0.2493870    | 0.8642776   | 0.1614753  | 0.8370067  | 0.6172194  | 0          | 0.3197998  |            |          |
| 0.2893451    | 1.5124860   | 0.1376591  | 0.3656559  | 0.3208303  | 0.1106697  |            |            |          |
| 0.08662025   | 0.1479476   | 0.04548829 | 0.07594071 | 0.03195392 | 0.1368507  |            |            |          |
| 0.05990043   | 0           | 0.2092199  | 1.2084270  | 0.8829647  | 0.3945615  | 0.7603754  |            |          |
| 0.1194854    | 1.4860790   | 0.02017769 | 0.01896534 | 0.5448955  | 0          | 0.1583755  | 0          |          |
| 0.3129742    | 0.3866808   | 0.07845748 | 0          | 0          | 0.1033197  | 0.3844688  |            |          |
| 0.5454435    | 0.1487691   | 0.07917047 | 0.2953860  | 0.02306204 | 0          | 0.05579413 |            |          |
| 0.1445379    | 0.1429120   | 0.02816838 | 0.4226454  | 0.5206918  | 0.04671771 |            |            |          |
| 0.01058917   | 0.8227923   | 0.1520086  | 0.2019611  | 0.2279088  | 0.5178079  |            |            |          |
| 0.4794295    | 0           | 0.1609111  | 0.6516994  | 0.02622808 | 0.5476438  | 0.1028319  |            |          |
| 1.5952       | 3.9348050   | 0.07134037 | 0.2041601  | 0.05385706 | 0.1130830  | 0.03148279 | 0          |          |
| 0.3286689    | 0.004478122 | 0.08023009 |            |            |            |            |            |          |
| TCGA-MV-A51V | 410         | 0          | 0.1226844  | 0.1874234  | 0          | 0.2755968  | 0          | 14.74742 |
| 0.06106228   | 0.1783356   | 0.4158050  | 0.08659354 | 0.2165021  | 0.1879194  |            |            |          |
| 0.9421151    | 0.1894234   | 0.1491327  | 0.04148973 | 0.6823502  | 0.648986   |            |            |          |
| 0.09397946   | 0.02876429  | 0.2881431  | 2.15849125 | 0.564170   | 0.1613789  | 0.03768362 |            |          |

|              |             |            |            |            |            |            |            |          |
|--------------|-------------|------------|------------|------------|------------|------------|------------|----------|
| 0.08068944   | 0.5662560   | 1.5215720  | 0.1161325  | 0.1314939  | 0.1129652  |            |            |          |
| 0.4086335    | 0.09803687  | 0.1308018  | 0.5567735  | 0.1602229  | 0.1293719  |            |            |          |
| 0.04075491   | 0.03570739  | 0.05450076 | 0.3168787  | 0.08108433 | 13.9999    |            |            |          |
| 0.1667943    | 0.06600889  | 0.03264319 | 0.6354293  | 1.2791652  | 2.24444    | 0.04662729 |            |          |
| 0.3151566    | 0.1549398   | 0.1868597  | 0.6502445  | 0.94376    | 0.04217557 |            |            |          |
| 1.3231570    | 0.06213086  | 0          | 0.2739629  | 0          | 0.02781319 | 0.0794602  | 0.05254196 |          |
| 0.4474236    | 0.05661127  | 0.04662729 | 0.1033166  | 0.02785097 | 0.3079279  |            |            |          |
| 0.5006883    | 12.049620   | 0.1656823  | 0.2999186  | 0.01463194 | 0.1594377  |            |            |          |
| 0.05775138   | 0           | 0.3116282  | 0.3331414  | 0.1266362  | 0.5361887  | 0.2379842  |            |          |
| 0.09145858   | 1.2259      | 0.04526839 | 0.06372396 | 0          | 0.2106131  | 0.4065823  |            |          |
| 0.1370030    | 0.07510423  | 0.6870761  | 0.09037217 | 0.1404087  | 0.3170231  |            |            |          |
| 2.2837290    | 0.03707461  | 0.1798288  | 0.1080537  | 0.1693516  | 2.6710470  | 0.6792442  |            |          |
| 0            | 0.04303437  | 0.3229675  | 0.07927383 | 0.3471439  | 0.1038399  | 0          |            |          |
| 0.04422126   | 2.7655620   | 0.2930701  | 0.00620533 | 0          | 0.1031218  | 0.09395972 |            |          |
| 0.08305208   | 0.07245582  | 0.09558595 | 0.1244692  | 0.1353122  | 0.5813414  |            |            |          |
| 0.01414476   | 1.1537940   | 0.2259304  | 2.8457730  | 0.2653275  | 0.3358425  |            |            |          |
| 0.06903429   | 0.6435594   | 0.5432207  | 0.04643562 | 0.09204573 | 0.260234   |            |            |          |
| 0.06032123   | 0.3209713   | 0.5248322  | 0.1476377  | 0.03829329 | 0.04352425 |            |            |          |
| 0.05344591   | 0.4239206   | 1.0575470  | 0.1000094  | 0.2774584  | 0.3047872  |            |            |          |
| 0.06455155   | 0.5735157   | 0.1248862  | 0.3145867  | 0.04627997 | 2.819072   |            |            |          |
| 0.9175582    | 0.7706154   | 0.1588009  | 0.7504261  | 0.4841366  | 0.1690287  |            |            |          |
| 0.1171176    | 0.04706884  | 0.3263910  | 0.3091088  | 0.1861063  | 0.2439494  |            |            |          |
| 0.4084001    | 0.4765199   | 0.1338546  | 0.06175592 | 0.01619045 | 0.1786332  |            |            |          |
| 0.1064340    | 0.2528214   | 0.5510498  | 0.1943660  | 0.0846758  | 0.1804163  | 0.1441499  |            |          |
| 0.2616036    | 0.3823438   | 0          | 0.03794251 | 0.08453179 | 0.08844251 | 0.1206425  |            |          |
| 0.3368356    | 0           | 0.3071822  | 0.6183072  | 0.3483974  | 0.1304966  | 0.4551712  |            |          |
| 1.7153980    | 0.06325764  | 0.2287226  | 0.06228658 | 0.05083697 | 0          | 1.288293   |            |          |
| 0.08202094   | 0           | 0.3581030  | 0.7525183  | 0.2686740  | 0.5402684  | 0.9506362  |            |          |
| 0.3599418    | 0.2992456   | 0.09670174 | 0.3375972  | 0.4718105  | 0.1882753  | 0          |            |          |
| 0.1308018    | 0.1025594   | 0.4550197  | 0          | 0          | 0.1137407  | 0.0943163  |            |          |
| 0.2582578    | 0.3950830   | 0.06790258 | 0.1084072  | 0          | 0          | 0          | 0.09167788 |          |
| 0.02827343   | 0.09784388  | 0          | 0.2183862  | 0.4583424  | 0.0319850  | 0.08699771 | 0          |          |
| 0.1942674    | 0.03130676  | 0.6808862  | 0.1272615  | 0.2813473  | 0          | 0.4212262  |            |          |
| 0.1338546    | 0.1436552   | 1.0560840  | 0.03520162 | 1.2620337  | 0.3417290  | 0.0804469  |            |          |
| 0.02795539   | 0           | 0          | 0.04310901 | 0          | 0.2333554  | 0.07358208 | 0.09765165 |          |
| TCGA-E5-A2PC | 1326        | 0          | 0.02897266 | 0.08262089 | 0          | 0.11613    | 0          | 23.20052 |
| 0.06729441   | 0.04913423  | 0.2291214  | 0.1329555  | 0.02862943 | 0.03848367 |            |            |          |
| 0.1035494    | 0.6444429   | 0.06262689 | 0.1369612  | 0.02286212 | 0.4212968  |            |            |          |
| 0.04207193   | 0.0632935   | 0.06340006 | 0          | 1.4338212  | 0.781060   | 0.1333871  |            |          |
| 0.09344178   | 0.2667743   | 0.0693388  | 0          | 1.2157280  | 0.03199629 | 0.1207620  |            |          |
| 0.4503394    | 0.1196187   | 0.07207585 | 0.05578172 | 0.09319263 | 0.03920836 |            |            |          |
| 0.02694866   | 0.03935176  | 0.03753951 | 0.6236071  | 0.02233999 | 3.177326   |            |            |          |
| 0.09190881   | 0.2000512   | 0          | 0.3890458  | 0.1762149  | 2.7970350  | 0.05138616 |            |          |
| 0.6450267    | 0.008537664 | 0          | 0.3726371  | 0.2724024  | 0.01377188 | 0.3170003  |            |          |

|              |            |             |             |            |             |             |            |
|--------------|------------|-------------|-------------|------------|-------------|-------------|------------|
| 0            | 0          | 0.2587920   | 0.01114613  | 0.1545354  | 0.3763792   | 0.02241311  |            |
| 0.1559728    | 0.02569308 | 0.09833478  | 0.05115582  | 0.09897872 | 0.4514641   |             |            |
| 3.3494990    | 0.01825922 | 0           | 0.08465783  | 0.2635653  | 0.0636456   | 0.08736467  |            |
| 0.2575752    | 0.03671424 | 0.2093413   | 0.04431849  | 0.09366903 | 0.08063442  |             |            |
| 0.1842298    | 0.02494428 | 0.4213665   | 0           | 0.1160543  | 0.06161085  | 0.03019716  |            |
| 0.00788281   | 0.2080596  | 0.04979786  | 0           | 0.3015474  | 2.23552     | 0.002269917 | 0          |
| 0.05954092   | 0.04665899 | 1.5358220   | 0.4623515   | 0.1003254  | 0.01976106  |             |            |
| 0.4983022    | 0.1310470  | 0.9912146   | 0.05721899  | 0          | 0.04873456  | 1.870254    |            |
| 0.09598887   | 0.5167703  | 0.006838658 | 0.09758489  | 0.1136466  | 0.362423    |             |            |
| 5.1975130    | 0.1597016  | 0           | 0.02286212  | 0.1540932  | 1.1371970   | 0.03897101  |            |
| 0.7669678    | 0          | 1.08888     | 0.1222715   | 0.1218364  | 0.07402385  | 0.1521601   |            |
| 1.4109390    | 0.03741643 | 0.02558747  | 0           | 0.09559799 | 0.06647773  | 0.227398    |            |
| 1.0121960    | 0.1627059  | 0.02110079  | 0.02398321  | 0          | 0.1459959   | 1.880664    |            |
| 0.02755415   | 0.1092058  | 0.3896374   | 0.6758281   | 0.6320498  | 0.03440807  |             |            |
| 0.02476386   | 0          | 0.4496673   | 0.5798859   | 0          | 0.04375212  | 0.4621561   | 0.333871   |
| 0.2765978    | 0.0860472  | 0.1556183   | 0.4367824   | 0.0340657  | 0.1104388   |             |            |
| 0.01680296   | 0.3706559  | 0.1413877   | 0.04917204  | 0.1458404  | 0.2765647   |             |            |
| 0.1230405    | 0.02932422 | 0.1044843   | 0.9716656   | 0.2969638  | 0.06998848  |             |            |
| 0.04970749   | 0.07446662 | 0.9209692   | 0.2708785   | 0.1229301  | 0.0209075   | 0           |            |
| 0.04873456   | 0.03323886 | 0.7593008   | 0.03843147  | 0.4051601  | 0.1190818   |             |            |
| 0.01066543   | 0.08788713 | 0.3511388   | 0.4841459   | 0.1252538  | 0.05664249  |             |            |
| 0.2520665    | 0.03432184 | 0.09804461  | 0           | 0.3484912  | 0.09039216  | 0.1097748   |            |
| 0.3551865    | 0.1460737  | 0.09869847  | 0.4167865   | 0.1995543  | 0.09015413  |             |            |
| 0.7667552    | 0.03044894 | 0.01430973  | 0.01813829  | 0.02593639 | 0.1672965   | 0           |            |
| 0.03027505   | 0.3692568  | 0.2367910   | 0           | 0.07795681 | 0.2134621   | 0.6888957   |            |
| 0            | 0.1045375  | 0           | 0.01740078  | 0          | 0.02946846  | 0.06231814  | 0          |
| 0.2406751    | 0.8418696  | 0.03524945  | 0.03994869  | 0.1825922  | 0.1682172   |             |            |
| 0.02875165   | 0.2411932  | 0.1602857   | 0           | 0          | 0.1392652   | 0           | 0.05936884 |
| 0.7885392    | 0.03879437 | 3.3166157   | 0.6424440   | 0.07282578 | 0.2002557   | 0.08127248  |            |
| 0.2559703    | 0.0178158  | 0           | 0.8266245   | 1.0406810  | 0.03363068  |             |            |
| TCGA-DK-A3X2 | 547        | 1           | 0.1314772   | 0.1687191  | 0.1430445   | 0.3283584   |            |
| 0.04035382   | 72.462640  | 0.0573351   | 0.1919533   | 0.1810045  | 0.05196784  |             |            |
| 0.04191308   | 0.2114570  | 0.5117813   | 0.1420996   | 0.07458317 | 0           | 0.1480129   |            |
| 0.08591458   | 0.04700033 | 0.02157808  | 0.1080782   | 0.19562165 | 0.177670    | 0.3813436   |            |
| 0.05653817   | 0.06053072 | 0.09439728  | 0.08322974  | 0.8180295  | 0           | 0           |            |
| 0.02824767   | 1.0311030  | 0.3256959   | 0.2382999   | 0.2657927  | 0.3071631   |             |            |
| 0.1843966    | 0.04280231 | 0.2366148   | 0.09199077  | 0.0679179  | 0           | 2.720019    |            |
| 0.2919558    | 0.1733124  | 0.008162637 | 0.3177863   | 0.6168793  | 8.541204    |             |            |
| 0.4197403    | 3.85028    | 0.5927784   | 0.1401764   | 0.3219436  | 0.1348533   |             |            |
| 0.005859039  | 0.8199671  | 0           | 0.08856752  | 0.4110370  | 0.001896781 | 0.06662136  |            |
| 0.3941535    | 0.6102607  | 0.08493605  | 0.005829726 | 0.3100198  | 0.06267881  |             |            |
| 0.4812458    | 2.6633520  | 0.6053072   | 0.0497159   | 0.0102268  | 0           | 0.2541611   |            |
| 0.0144411    | 0.02973439 | 0.6623592   | 0.4998247   | 0.5937409  | 0           | 0.1785284   |            |
| 0.05946149   | 0.1672059  | 0.3395895   | 0.4780375   | 0          | 0.03949886  | 0.1601279   |            |

|              |             |             |             |            |            |            |
|--------------|-------------|-------------|-------------|------------|------------|------------|
| 0.06166526   | 0.005365797 | 0.9008298   | 0           | 0.05266515 | 0.1868593  | 1.2697710  |
| 0            | 0.08105853  | 0.09528175  | 0.9583088   | 0.4496012  | 0.1024366  | 0.2098398  |
| 0.2786223    | 0.1189376   | 0.5800188   | 0.05193165  | 0          | 0.1658671  | 1.8766060  |
| 0.2638226    | 0.004655047 | 0.04428376  | 0.2320763   | 0.7400997  | 0.0207677  |            |
| 0.5435412    | 0           | 0.06224862  | 0.09473992  | 1.3846310  | 0.03183289 | 0.4533782  |
| 0.1694860    | 0.3138213   | 0.02774325  | 0.06634684  | 0.05038774 | 0          | 0.6368566  |
| 0.3565690    | 0.2159743   | 0           | 0.1301463   | 0.09050225 | 0.5847581  | 0.4284523  |
| 0            | 0           | 0           | 0.3577637   | 0.4687911  | 0          | 0.1189376  |
| 0.3585281    | 0.1873715   | 0.1011399   | 0           | 0.7791298  | 1.9344840  | 0.1191276  |
| 0.4967175    | 0.9079609   | 0.3073943   | 0           | 0.9533589  | 1.5390480  | 0.04637677 |
| 0.4080942    | 0.02287541  | 0.4685646   | 0.2199819   | 0.03347121 | 0.03309099 | 0          |
| 0.01675064   | 0.07984352  | 0.2086247   | 0.4547186   | 0.4573050  | 0.3811271  | 1.522606   |
| 0.1284125    | 0.3488835   | 0.08194929  | 0           | 0.0569266  | 0          | 0.2985608  |
| 0.1357534    | 0.9004728   | 0           | 0.7305394   | 0.6034358  | 0.07259915 | 0.1414032  |
| 0.06829107   | 0.3923288   | 0.1989394   | 0.1127031   | 0.3284544  | 0.1401764  |            |
| 0.2912229    | 0           | 0.1932876   | 0           | 0          | 0.2149102  | 0.05933833 |
| 0.3242341    | 1.3583580   | 0.1718292   | 0.4377454   | 0.08290589 | 0.1363681  |            |
| 0.1152355    | 0           | 0.1301463   | 0           | 0.01648648 | 0.6268275  | 0          |
| 0.03537659   | 0.1788342   | 1.8615040   | 0.1016547   | 0          | 0.1184464  | 0          |
| 0.0859674    | 0.2120986   | 0           | 0.009644833 | 0          | 3.6293630  | 0.1919533  |
| 0.5468749    | 0.2290096   | 0.02739959  | 0.3618024   | 0.4636999  | 0.0234509  |            |
| 0.04552738   | 0.4618328   | 0           | 0.05388284  | 1.0922620  | 0.4733692  | 2.487276   |
| 0.1250082    | 0.02097127  | 0           | 0.2903966   | 0.01616953 | 0          | 0.06252    |
| 0.03662763   |             |             |             |            |            | 0.1149979  |
| TCGA-GD-A76B | 224         | 0           | 0.13798182  | 0.06707056 | 0.18196534 | 0.08121969 |
| 0.11550072   | 17.86641205 | 0.39332679  | 0.10940304  | 0.16024425 | 0          | 0.061976   |
| 0.19494094   | 0.06724806  | 0.32551577  | 0.0813435   | 0.09784134 | 0.02969468 |            |
| 0.20005352   | 0.24590477  | 0.0298943   | 0.02058694  | 0.10311369 | 4.47866712 |            |
| 23.47937908  | 0.10972569  | 0.0404559   | 0.11550072  | 0.13509199 | 0.31762699 |            |
| 1.85131161   | 0           | 0.06274113  | 0           | 0.42540177 | 0.45607978 | 0.20060652 |
| 0.21735778   | 0.0764489   | 0.10648193  | 0.02333501  | 0.05395197 | 0.01950341 |            |
| 0.09719733   | 0.05803299  | 10.23614928 | 0.19896098  | 0.04724332 | 0.04672621 |            |
| 0.20212627   | 0.16348448  | 1.60637191  | 0.10011507  | 0.45112239 | 0.21069521 |            |
| 0.06686884   | 0.7539278   | 0.9327780   | 0.08161277  | 2.38808441 | 0          | 0.21124835 |
| 0.81232478   | 0.05390034  | 0.05067038  | 0.12377715  | 0.18802443 | 0.64045246 |            |
| 0.36465604   | 0.03893364  | 0.10755623  | 0.13288839  | 0.14692503 | 0.29319415 |            |
| 0.6545041    | 0.11858074  | 0.70250797  | 0.12043084  | 0.05705569 | 0.05511111 |            |
| 0.0567372    | 0.6319350   | 0.14305988  | 0.13595245  | 0.03837564 | 0.04866515 |            |
| 0.11782434   | 0.2392885   | 0.03239911  | 0.13682394  | 0          | 0          | 0.04364935 |
| 0.03922186   | 0.05887229  | 0.27024005  | 0.16170101  | 0.05024608 | 0.85626642 |            |
| 0.55764998   | 0.02358642  | 0           | 0           | 0.57573274 | 1.99481624 | 0.34315971 |
| 0.06515425   | 0.1334675   | 0.34672732  | 0.0851058   | 0.48561638 | 0.14863882 |            |
| 0.03690272   | 0.09494899  | 2.55515411  | 0.04155867  | 0.88096543 | 0.01332368 | 0          |
| 0.25831905   | 0.33624029  | 0.07076349  | 0.36300228  | 0.06841197 | 0.08908403 |            |

|              |                    |                         |                    |            |                   |             |
|--------------|--------------------|-------------------------|--------------------|------------|-------------------|-------------|
| 0.10975713   | 1.52906748         | 0.04049428              | 0.44566086         | 0          | 0.67366469        | 0.07940675  |
| 0.56969396   | 0.02060283         | 0                       | 1.7542110.24299333 | 0.17946637 | 0.26351276        |             |
| 0.1552104    | 0                  | 0.45944568              | 0.90592742         | 0.10566601 | 0                 | 0.03115081  |
| 0.07650371   | 0.11377683         | 0.41285365              | 0.03578896         | 0.0283686  | 0.2225025         |             |
| 0.18480116   | 0.30785385         | 0.04469124              | 0.12865903         | 0.03312311 | 0.79643783        |             |
| 0.65048229   | 0.09192306         | 0.05682783              | 0.47390173         | 0.4620029  | 0.30427252        |             |
| 0.2067619    | 0.37056482         | 0.23360184              | 0                  | 0.11270635 | 0.06547403        | 0.43844499  |
| 0.15740807   | 0.12773509         | 0.04419943              | 0.11587695         | 0.31962464 | 0.03808803        |             |
| 0.14475777   | 0.59158907         | 0.60702549              | 0.03030172         | 0.16140755 | 0.10961787        |             |
| 2.08036392   | 0.58638829         | 0.03193377              | 0.08146769         | 0.60500379 | 0.09494899        |             |
| 0.0863452    | 0.95115899         | 0.03327804              | 0.30171432         | 0.18474536 | 0.18008758        |             |
| 0.13490808   | 0.06515425         | 0.49408643              | 0.43383199         | 0.09620773 | 0.13095954        |             |
| 0.13373768   | 0.16042304         | 0                       | 0.73763705         | 0.11740668 | 0                 | 0.15377906  |
| 0.14841719   | 0.0640977          | 0.3480087               | 0.58318398         | 0.21077551 | 0.28913426        |             |
| 0.04943611   | 0.03717265         | 0.3664747               | 0                  | 0          | 0                 | 0.03932302  |
| 0.05125969   | 0.07887854         | 0.08140554              | 0.06750327         | 0.27014798 | 0.40865424        |             |
| 0.04859866   | 0.09698534         | 0.09649428              | 0.09040463         | 0          | 0.07108283        | 0.06070686  |
| 0.1400560    | 0.17193166         | 1.85889895              | 0.02289204         | 0.14528563 | 0.14229689        |             |
| 0.10924524   | 0.11203304         | 0.13053164              | 0.28625929         | 0.64883803 | 0                 | 0.37568606  |
| 0.12773509   | 0.05140784         | 0.53222687              | 0.02519421         | 1.14643492 | 3.41122686        |             |
| 0.07402728   | 0.1600640.05278075 | 0.22164625              | 0.06170724         | 0          | 0.5487640         |             |
| 0.13104453   |                    |                         |                    |            |                   |             |
| TCGA-GC-A6I1 | 0                  | 0                       | 0.01598289         | 0.01709181 | 0.1738906         | 0.02956783  |
| 0.2943343    | 49.813760          | 0.1510142               | 0.1458413          | 0          | 0.04738065        | 1.461663    |
| 0.1713705    | 0.5332646          | 0.03454839              | 0.1218329          | 0.2270158  | 0.3523639         | 0           |
| 0.03809033   | 0.05246237         | 0.1970762.02619335.7277 | 0.1398088          | 0.4467455  |                   |             |
| 0.5886687    | 0                  | 0                       | 0.4625254          | 0.2118107  | 0                 | 0           |
| 0.03408082   | 0.04615834         | 0.1298782               | 0.08258522         | 1.21904    | 0.1013066         |             |
| 0.06212649   | 0                  | 0.1109156               | 1.7221690          | 0          | 0                 | 0.3863138   |
| 3.93769      | 0.0425211          | 0.4105751               | 0.0847771          | 0          | 0.0948770.2458996 |             |
| 0.01424497   | 0.1573871          | 0                       | 0.05383312         | 0.1784547  | 0                 | 0.004611607 |
| 0.0682001    | 0                  | 0.2967430.05162584      | 0.03543425         | 0.06852228 | 0.0169322         |             |
| 0.09360349   | 0                  | 0.1962229               | 0.09065498         | 0          | 0                 | 0.03634923  |
| 0.1184104    | 0                  | 0.2598391               | 0.09779393         | 0.09301126 | 0.09452494        | 0.5081557   |
| 0            | 0.1743365          | 0                       | 0                  | 0.05561655 | 0                 | 0           |
| 0.06402188   | 0.2374789          | 0.5635309               | 0.0638627          | 0          | 0                 | 0.07721889  |
| 0.7942901    | 0.4008058          | 0.04150869              | 0.07194839         | 0.2356205  | 0                 | 0.5611975   |
| 0            | 0                  | 0                       | 1.63931            | 0          | 0.2672611         | 0.02263545  |
| 0.08568523   | 1.1973840.06607506 | 0                       | 0                  | 0.05758483 | 0.8614874         | 0.01289911  |
| 0.6513530    | 1.1846390.1011774  | 0.1209808               | 0.03500192         | 0          | 0.6742932         | 0           |
| 0.07622335   | 0.0419699          | 0.07910556              | 0                  | 0.08363005 | 0.6475355         | 0           |
| 0.2778392    | 0                  | 0.04832355              | 0.4822073          | 0.09120219 | 0.03614632        | 0.1500910   |
| 0.2615047    | 0                  | 0.1229498               | 0                  | 0.8794886  | 0.3212184         | 0           |
| 0.1471672    | 0.07473617         | 0.1139239               | 0.1287713          | 0.08504219 | 0                 | 0.01305515  |

|              |            |            |            |            |            |            |            |
|--------------|------------|------------|------------|------------|------------|------------|------------|
| 0            | 0.3505267  | 0.1002821  | 0.0813779  | 0.1689523  | 0          | 0.5497943  | 0          |
| 0.06916707   | 0.1507566  | 0.3142147  | 0.1544378  | 0          | 0.05751177 | 0.3711022  |            |
| 0.4482938    | 0.04068895 | 0          | 0.3854378  | 0.08065389 | 0.1100182  | 1.17284    | 0          |
| 0.2980111    | 0.16423    | 0.1059053  | 0.05289088 | 0.04150869 | 0.4960079  | 0          |            |
| 0.03605432   | 0.1013105  | 0          | 0.07164735 | 0          | 0.08544296 | 0.1495957  |            |
| 0.09083665   | 0          | 0.1403690  | 0.2450135  | 0.09853802 | 0.2476912  | 0.1492017  |            |
| 1.0097030    | 0.0377939  | 0.02368207 | 0.02001214 | 0.1287713  | 0          | 0          | 0.1369511  |
| 0.1659795    | 0.1306268  | 0.1005044  | 0          | 0.3440417  | 0.09058251 | 0.2517097  |            |
| 0.0619228    | 0.0247151  | 0          | 0.05759528 | 0          | 0.01393406 | 0.07735066 | 0          |
| 0.009957708  | 0.1857684  | 0          | 0.03966816 | 0.18131    | 0.1012339  | 0.03806633 |            |
| 0.08500752   | 0.04973755 | 0.02850785 | 0.02767246 | 0.1477428  | 0.1220668  |            |            |
| 0.06550215   | 1.4645670  | 0.03210162 | 0.1770605  | 1.3093410  | 0.04716155 | 0.3569094  |            |
| 0.06725147   | 0          | 0.1179380  | 0.2584062  | 0          | 0.07792054 |            |            |
| TCGA-XF-A9SK | 486        | 1          | 0.1097458  | 0.1369201  | 0          | 0.1861072  | 0.05613979 |
| 56.671950    | 0.4254078  | 0.2002825  | 0          | 0.05422282 | 1.51239    | 0.2941767  |            |
| 0.8476007    | 0.05930621 | 0.2788531  | 0.1731992  | 0          | 0.3585703  | 0.02179545 |            |
| 0.2701727    | 0          | 2.6701252  | 9.4867     | 0.06736775 | 0.3932765  | 0.4210484  |            |
| 0.1313245    | 1.0420952  | 3.289990   | 9.695919   | 0.09148706 | 0          | 0.8916912  |            |
| 0.1461628    | 0.09750595 | 1.05648    | 0.1950817  | 0.1890225  | 0.1446120  | 0.08281157 |            |
| 0.05687847   | 1.13384    | 0.0423109  | 7.0162790  | 0.05802367 | 0.1722217  | 0.1703366  |            |
| 1.7684030    | 1.907102   | 2.9938760  | 0.5638387  | 0.2748890  | 1.3707980  |            |            |
| 0.0766197    | 1.4409210  | 0.06484146 | 0.06160708 | 0.4901401  | 0.0785957  |            |            |
| 0.1688820    | 2.536585   | 0.4386737  | 0.2122470  | 2.954053   | 0.04055125 | 0.1470328  |            |
| 0.1647075    | 0.2410214  | 0.7125435  | 4.7718820  | 1.383284   | 0.1991838  |            |            |
| 0.03817572   | 0.1247951  | 0.1406321  | 0          | 0.1084079  | 0.1390701  | 0.2643219  |            |
| 0            | 0.07096192 | 0.1718076  | 0.3489226  | 0.04724332 | 0.1330081  | 0.09068735 |            |
| 0.1099008    | 0.1060801  | 0          | 0.05971871 | 0.8527096  | 0.04715742 | 0          |            |
| 0.3544863    | 1.9908080  | 0.6921581  | 0          | 0          | 0.3534798  | 11.3321    | 1.417755   |
| 0.0950058    | 0.2619857  | 0.5224393  | 0.08273232 | 0.7081099  | 0.07224675 |            |            |
| 0.05381034   | 0.0923014  | 3.686810   | 0.7952254  | 0.03238025 | 0.06160708 |            |            |
| 0.2152413    | 0.04902946 | 1.8036740  | 2.268506   | 0.09975609 | 0.0432998  |            |            |
| 0.1741658    | 0.6370389  | 0.05904743 | 1.20413    | 0.1768403  | 1.4591120  | 1.929805   |            |
| 0.7845585    | 0.2703814  | 0.07204606 | 1.3718520  | 2.834599   | 0.1986921  |            |            |
| 0.04803071   | 0.2715872  | 0.06295287 | 0.6220951  | 1.6270780  | 0.1598557  |            |            |
| 0.1362693    | 0          | 0.3318113  | 1.3545220  | 1.565588   | 0.08273232 | 0.2544673  |            |
| 1.2799870    | 0.09975609 | 0.06516729 | 0.09380319 | 0.04829904 | 1.47103    | 0.8532069  |            |
| 0.06701959   | 0.1242967  | 0.1842741  | 0.5894678  | 0.1336386  | 1.458576   |            |            |
| 0.04912231   | 0.3406305  | 0          | 0.1045830  | 0.06364805 | 1.2911880  | 3.060364   |            |
| 0.2793887    | 0.1565218  | 0.4055231  | 0.7923125  | 0.05553872 | 0.1846959  |            |            |
| 0.5750905    | 0.3688103  | 0.1767399  | 0.5177902  | 0.1598412  | 1.304413   |            |            |
| 0.3420209    | 0.09312956 | 0.07919567 | 0.9704163  | 0.4153545  | 0.3147643  |            |            |
| 0.4729687    | 0.02426247 | 0.3853825  | 0.4197466  | 1.0907910  | 0.09079317 |            |            |
| 0.1425087    | 0.2838178  | 0.1581499  | 0.1650435  | 0.3478216  | 0.1300079  |            |            |
| 0.1109328    | 0          | 1.6378430  | 5.5135957  | 0.4158170  | 0.07474519 | 0.6559445  | 0          |

|              |            |            |            |             |            |            |
|--------------|------------|------------|------------|-------------|------------|------------|
| 0.9021420    | 0.4724332  | 0.08537387 | 1.0930530  | 0.05766889  | 0.1355098  | 0.6756108  |
| 0.1964893    | 0.09052908 | 0.06825416 | 0.3402146  | 0.3367266   | 0          | 0.1150181  |
| 0.1780543    | 0.04921553 | 0.4457526  | 0.2880587  | 0.14173     | 0.0848525  | 0          |
| 0.1647813    | 0          | 0.07973127 | 0.02950692 | 0.1021125   | 0.01341779 | 0.1595396  |
| 0.9566772    | 0          | 0.04539659 | 0.1383284  | 0.3041140   | 0.04900887 | 0.3172283  |
| 0.5502274    | 0.3914956  | 0          | 0.1623150  | 0.2793887   | 0.07496122 | 2.2499680  |
| 3.49536      | 9.5775350  | 0.08995346 | 0.05835002 | 0           | 0.2423980  | 0.02249487 |
| 1.8091240    | 0.03199677 | 0.1019119  |            |             |            |            |
| TCGA-DK-A1AD | 3420       | 0          | 0.1891068  | 0.1427487   | 0.04034202 | 0.1337629  |
| 0.11949828   | 403970     | 0.1550244  | 0.1131893  | 0.1827073   | 0.7657151  | 0.03297644 |
| 0.9242161    | 0.2683621  | 0.8041510  | 0.1623059  | 0.1400094   | 0.2370010  | 0.1617551  |
| 0.12115      | 0.01988285 | 0.2921061  | 0.1828838  | 3.1421775   | 2.2475     | 0.2304604  |
| 0.04783542   | 0.1024268  | 0.1198005  | 0.7041844  | 1.1427910   | 0.3685451  |            |
| 0.1669178    | 0.07169878 | 0.4951395  | 0.5022349  | 0.1185995   | 0.2891315  |            |
| 0.1412404    | 0.09032329 | 0.04138729 | 0.08813547 | 0.03459151  | 0.2298540  |            |
| 2.9565760    | 0.1411520  | 0.05524949 | 0.5377408  | 0.4639333   | 3.8915450  | 0.1479712  |
| 0.7715412    | 0.04916998 | 0.2371990  | 0.5200131  | 0.08557178  | 0.1150065  |            |
| 0.9493449    | 0.03943433 | 0.1124019  | 0.4222889  | 0.2867951   | 0.1620864  |            |
| 0.1572330    | 0.2000896  | 0.2839788  | 0.3593105  | 0.009864747 | 0.2682607  |            |
| 0.2298003    | 0.3175919  | 1.0978052  | 0.7313820  | 0.1051582   | 0.04326311 | 0.1810938  |
| 0.1517921    | 0.04887291 | 0.02515747 | 0.4450269  | 0.1268665   | 0.2210332  |            |
| 0.5955562    | 0.1510480  | 0.1122272  | 0.2122027  | 0.02873175  | 0.2426728  | 0          |
| 0.1161256    | 0.03478221 | 0.2338026  | 0.2160785  | 0.3728336   | 0.08911712 |            |
| 0.7258072    | 1.5006360  | 0.02353117 | 0.04565479 | 0           | 0.9405121  | 1.031926   |
| 0.3550357    | 0.08666885 | 0.3141089  | 0.07174536 | 0.05031493  | 0.4807232  |            |
| 0.3515037    | 0.03272558 | 0.08420141 | 1.7233820  | 0.07370902  | 0.1860110  | 0.01575404 |
| 0.1873365    | 0.1963535  | 0.08945405 | 0.2911764  | 0.7817884   | 0          | 0.02633344 |
| 0.2376079    | 2.5090380  | 0.06284355 | 0.6393185  | 0.03584939  | 0.7965472  |            |
| 0.09389125   | 2.3295720  | 0.03045122 | 0.08763184 | 0.5475179   | 0.04309763 |            |
| 0.3772492    | 0.08763184 | 0.2752833  | 0.1531430  | 0.5529537   | 0.4212860  | 0          |
| 0.1104990    | 0.0678440  | 0.4372249  | 0.5796922  | 0.1269516   | 0          | 0.3443370  |
| 1.2436980    | 0.1426196  | 0          | 0.6592007  | 0.6072127   | 0.1018975  | 0.2015812  |
| 0            | 1.0754820  | 0.4063719  | 0.4707837  | 0.5676153   | 1.1245810  | 0.3089325  |
| 0.05806281   | 0.2897060  | 0.1415954  | 0.1735838  | 0.03082814  | 0.1700672  |            |
| 0.06755345   | 0.1765117  | 0.5596002  | 0.3756985  | 0.1612306   | 1.517255   |            |
| 0.1887015    | 0.4197104  | 0.3466754  | 0          | 0.1204102   | 0.3755650  | 0.3648728  |
| 0.1148573    | 0.6297054  | 0.02951119 | 0.4397148  | 0.4381592   | 0.5528177  |            |
| 0.1932604    | 0.2311169  | 0.3850490  | 0.8175409  | 0.1455419   | 0.2530101  |            |
| 0.1185995    | 0.1129314  | 0          | 0.1338017  | 0.05205852  | 0.06322137 | 0.2272872  |
| 0.3324356    | 0.2557902  | 0.3429072  | 0.1149270  | 0.1557643   | 0.4083506  |            |
| 0.0964486    | 0          | 1.2558630  | 0.1493725  | 0.05505665  | 0          | 0.1418125  |
| 0.3182021    | 0          | 0          | 0.1197247  | 0.8511006   | 0.5959805  | 0          |
| 0.02852393   | 0.1202572  | 0.06113849 | 0.1503184  | 0.1076705   | 0.1863039  | 0          |
| 0.6098806    | 2.81212    | 0.1218049  | 0.1012316  | 1.0936450   | 0.15853    | 0.0761696  |

|              |            |            |             |            |            |            |
|--------------|------------|------------|-------------|------------|------------|------------|
| 0.2803876    | 0.3577071  | 0.2380940  | 0.1155585   | 0.4030836  | 0          | 0.2279441  |
| 0.2697042    | 0.04468479 | 0.4621215  | 0.5428830   | 0.08388342 | 0          | 0.2948361  |
| 0.0273612    | 0.02114441 | 0.08463437 | 0.4125377   | 0.2711594  |            |            |
| TCGA-K4-A5RI | 356        | 1          | 0.08468126  | 0.1207421  | 0          | 0.1958220  |
|              | 0.0491720  | 0.1333516  | 0.7984597   | 0.4857525  | 0.06973172 | 1.15292    |
|              | 0.3924119  | 0.04576144 | 0.2226725   | 0.2672855  | 0.05296197 | 0.2151936  |
|              | 0.1345412  | 0.0463264  | 0           | 1.4862254  | 0.2404160  | 0.6979516  |
|              | 0          | 1.1614691  | 0.0823360   | 0.3740749  | 0.1764815  | 0.0909682  |
|              | 0.3045089  | 0.1354263  | 0.3668372   | 0.1146877  | 0.1510612  | 0.1050207  |
|              | 0.1261995  | 0.03291613 | 0.1093607   | 0.9467816  | 9.3272360  | 0.08954365 |
|              | 0.2126216  | 0.01752452 | 0.5116961   | 0.4782525  | 0.0331750  | 0.6525980  |
|              | 0          | 0.3141759  | 0.1809494   | 0.08427852 | 0.4632640  | 0.05003251 |
|              | 0.1212909  | 0.17307    | 0.1355028   | 0.08462158 | 0.09826353 | 0.3191140  |
|              | 0.1663969  | 0.3289399  | 0.1653113   | 0.6597694  | 0.8230457  | 0.08005202 |
|              | 0.1097806  | 0.3181343  | 0.1604892   | 0.0775097  | 0.03191867 | 0.2300345  |
|              | 0.05365417 | 0.1529656  | 0           | 0.1095103  | 0.1669387  | 0.3589777  |
|              | 0.0513154  | 0          | 0           | 0.04911167 | 0.1765204  | 0.08351952 |
|              | 0.1455491  | 0.5653391  | 0.7233251   | 0.6443120  | 0.1492765  | 0.02896238 |
|              | 1.2614670  | 0.7949091  | 0.4182782   | 0.2199231  | 0.1559455  | 0.3250975  |
|              | 0.0957560  | 0.4955601  | 0.0836198   | 0.08304151 | 0.03561033 | 3.7353560  |
|              | 0.5192053  | 0.01998802 | 0.1426105   | 0.2906453  | 0.2269906  | 0.9012859  |
|              | 0.2917348  | 0          | 0.1670535   | 0.1416528  | 1.6970090  | 0.1366853  |
|              | 1.3519310  | 1.8161270  | 0.09272435  | 0.05559168 | 0.8049308  | 0          |
|              | 0.1397068  | 0.04857525 | 0.4061680   | 0.6090915  | 0          | 0          |
|              | 0.1280150  | 0.7354876  | 0           | 0.1915120  | 0.6675910  | 0.1039637  |
|              | 0.07237976 | 0          | 0.4779225   | 0.8124264  | 0          | 0.03196966 |
|              | 0.7147502  | 0.3464741  | 0.8299455   | 0.3032273  | 0.7509570  | 0.04978359 |
|              | 0.1037541  | 0.02455583 | 0.3869116   | 0.05903541 | 0.10779    | 0.1634005  |
|              | 0.1564535  | 0.2517359  | 0.0428544   | 0.1628729  | 1.1093680  | 0.4624406  |
|              | 0.1704685  | 0.1452850  | 0.1233355   | 0.8016905  | 0.3958616  | 0.2155799  |
|              | 0.06110841 | 0.1361429  | 0.2136620   | 0.1457258  | 0.7594881  | 0          |
|              | 0.2175327  | 0.5455258  | 0.1634668   | 0.3665386  | 0.4379951  | 0.06101526 |
|              | 0.02546994 | 0.1947098  | 0.2507895   | 0.1898026  | 0          | 0.0188624  |
|              | 0.1203187  | 0.2306975  | 0.3357020   | 0.3605947  | 0.4350653  | 0.2187214  |
|              | 0.3293781  | 0.0361940  | 0.1557432   | 0.1045612  | 1.1427590  | 0.1516137  |
|              | 0.3215059  | 0.2531605  | 0.05767437  | 0.04437473 | 0.1373890  | 0.07595068 |
|              | 0.3439485  | 0.9195871  | 0.1093607   | 0.1309466  | 0          | 0.1780064  |
|              | 0.08613036 | 0.2276792  | 0           | 0.6833204  | 0.2813779  | 1.1072770  |
|              | 2.1347210  | 0.2793552  | 0.004201765 | 0.2610960  | 0.2781617  | 0.02517359 |
|              | 0.2817998  | 0.2874399  | 0.02892053  | 0.6290233  | 0          | 1.3289893  |
|              | 0.08329112 | 0.2251182  | 0.05938577  | 0.3740749  | 0.1215013  | 0          |
|              | 0.5036582  | 0.06880699 |             |            |            |            |
| TCGA-FD-A3SQ | 1423       | 1          | 0.1117769   | 0.1344737  | 0.05067124 | 0.4523392  |
|              | 0.1500944  | 26.216390  | 0.04867925  | 0.2031005  | 0.1784906  | 0.2885309  |



|                           |                                    |                           |                                          |                            |                               |
|---------------------------|------------------------------------|---------------------------|------------------------------------------|----------------------------|-------------------------------|
| 0.09664613                | 3.4547220.2247159                  | 0.3884795                 | 0.1585601                                | 0.2724553                  |                               |
| 0.2646071                 | 0                                  | 1.3086570.09989474        | 0.2522419                                | 0.1148548                  | 2.004926                      |
| 23.626530.09648923        | 0.1802498                          | 0.2573046                 | 0.3511068                                | 2.0343151.394959           |                               |
| 0.3703263                 | 0.1397704                          | 0.4803020.8292209         | 0.5191768                                | 0.3873112                  |                               |
| 0.3631611                 | 0.2128846                          | 0.3558197                 | 0.05848216                               | 0.1850301                  | 0.1737935                     |
| 0.2165296                 | 0.06464097                         | 3.7336540.6648475         | 0.1841795                                | 0.06939564                 |                               |
| 0.5628539                 | 0.3641996                          | 4.1947420.1486863         | 1.5074690.6546512.234488                 |                            |                               |
| 0.4250710                 | 0.2814340.5044838                  | 0                         | 0                                        | 0.2808065                  | 0.09005662 0.1874614          |
| 0.2533848                 | 0.1675472                          | 0.7133781                 | 1.53445                                  | 0.01858579                 | 0.2396064                     |
| 0.4514605                 | 0.3477664                          | 1.9231871.8440160.2641661 | 0.2390971                                | 0.2974493                  |                               |
| 0.1906572                 | 0.1227728                          | 0.1895929                 | 0.2898374                                | 0.2124660.6057311          | 0                             |
| 0.1355161                 | 0.2138734                          | 0.1776902                 | 0.1443530.2032047                        | 0.2078230.08395109         |                               |
| 0.07292929                | 0.04368789                         | 0.2394944                 | 0.4786571                                | 0.4682944                  | 0.3917717                     |
| 1.2877341.8634420.2692891 | 0.08601645                         | 0.1292117                 | 3.4089582.175667                         |                            |                               |
| 1.0511430.3265789         | 0.4402768                          | 0.2317246                 | 0.4423834                                | 0.8679743                  |                               |
| 0.1931576                 | 0.04110468                         | 0.1057604                 | 1.8439510.1388724                        | 0.4205474                  |                               |
| 0.01978772                | 0.09412093                         | 0.2055234                 | 0.4119792                                | 2.0115130.6353849          |                               |
| 0.1524035                 | 0.03307589                         | 0.2588923                 | 1.0659330.09021039                       | 0.7884102                  |                               |
| 0.09005662                | 1.7289280.1474141                  | 3.4195880.09179516        | 0                                        | 0.8296125                  |                               |
| 0.8119859                 | 0.1924977                          | 0.1467589                 | 0.5878041                                | 0.1442655                  | 0.5117609                     |
| 1.1198340                 | 0.06105533                         | 0.2775826                 | 0.5112892                                | 0.3379523                  | 1.264625                      |
| 0.1594564                 | 0.1579941                          | 0.3304506                 | 1.8525930.5334123                        | 0.2489002                  |                               |
| 0.3224450                 | 0.8279832                          | 0.9637555                 | 0.05119498                               | 0.1265972                  | 0.2111452                     |
| 1.6081540.53492           | 2.0602961.0131371.0779760.04928472 | 0.6619369                 | 0.09723905                               |                            |                               |
| 0.4596413                 | 0.08766573                         | 0.2134196                 | 0.2320948                                | 0.6969854                  | 0.9612512 0                   |
| 0.3426366                 | 0.3514405                          | 0.5071087                 | 0.4725288                                | 0.5034018                  | 0.1939229                     |
| 0.7878638                 | 0.3918947                          | 0.07113988                | 0.09074407                               | 0.3369465                  | 0.2115209                     |
| 0.2885309                 | 1.2059330.03706727                 | 0.3725419                 | 0.5359892                                | 2.0985160.1271511          |                               |
| 0                         | 0.2334801                          | 0.06040383                | 0.1260735                                | 0.2813233                  | 0.2979317 0.1086876           |
| 0.03488108                | 0.5041813                          | 0.3269382                 | 0.07940864                               | 0.2283857                  | 1.04303                       |
| 0.2855850.6891289         | 0.6856770.4304221.0019540.05506519 | 0.1863243.845862          |                                          |                            |                               |
| 0.1125708                 | 0.4149205                          | 0                         | 0.4788862                                | 0.2572190.1427410.08786012 |                               |
| 0.04533743                | 0.03759479                         | 1.3303330.3386929         | 0.2706620.2160573                        | 0.1074817                  |                               |
| 0.3020959                 | 0                                  | 0.1339914                 | 0.02253977                               | 0.1560036                  | 0.03074877 0.01740989         |
| 1.9487660.1019946         | 0.02311839                         | 0.1584996                 | 0.2654935                                | 0.1788653                  |                               |
| 0.4200292                 | 0.5652420.3488986                  | 0.09676413                | 0.2841421                                | 0.5335491                  |                               |
| 0.08589215                | 1.72867                            | 0.08418891                | 2.32177212.508160.1603320.2005760.176372 |                            |                               |
| 0.9875368                 | 0.03436679                         | 0                         | 0.6776896                                | 0.04888343                 | 0.05838641                    |
| TCGA-GV-A3QF              | 617 1                              | 0.3226012                 | 0.2979406                                | 0.1595380.1898915          | 0                             |
| 15.166090                 | 0.04263069                         | 0.2676077                 | 0                                        | 0.02897995                 | 0.03213774 0.7861292          |
| 1.4677490.1505599         | 0.1325727                          | 0.0694261                 | 0.05502644                               | 0.4152235                  |                               |
| 0.04368302                | 0                                  | 0.0602699                 | 3.93329632.229040.1485223                | 0                          | 0 0.3684856                   |
| 0                         | 0.4667843                          | 0                         | 0.07334433                               | 0                          | 0.6837796 0.2753667 0.2657767 |
| 0.2964395                 | 0.3872644                          | 0.1190652                 | 0.0136393                                | 0.05975034                 | 0.07979815                    |

|              |             |            |             |            |            |            |            |          |
|--------------|-------------|------------|-------------|------------|------------|------------|------------|----------|
| 0.2272472    | 0.03392026  | 3.28645    | 0.04651704  | 0.0276137  | 0.01820763 |            |            |          |
| 0.8269990    | 0.8791207   | 2.2198390  | 0.1560459   | 0.5650303  | 0.01296329 | 0.07816961 |            |          |
| 1.0554330    | 0.1128017   | 0.0248315  | 0.9626443   | 0.05198279 | 0          | 0.6876464  |            |          |
| 0.03150472   | 0.002115487 | 0.2150877  | 0.04396008  | 0.3062816  | 0.3789178  |            |            |          |
| 0.02600765   | 0.3064745   | 0.1165098  | 0.1717552   | 1.1424793  | 0.1504720  | 0.360414   |            |          |
| 0.2281198    | 0           | 0.3001412  | 0.01610621  | 0.03316287 | 0.2824561  | 0.5017106  |            |          |
| 0.2119044    | 0           | 0.4551161  | 0.04591218  | 0          | 0.1514981  | 0.2665784  | 0          |          |
| 0.08810643   | 0.1105564   | 0.02292516 | 0.02393797  | 0.7820076  | 0          | 0          |            |          |
| 0.1641977    | 1.88824     | 0          | 0           | 0.1416907  | 2.0890280  | 0.4345828  | 0.03808263 |          |
| 0.0540081    | 0.1756404   | 0.1989772  | 0.8845326   | 0.7819139  | 0.04313925 |            |            |          |
| 0.4069827    | 1.8195290   | 0.3923230  | 0.005191789 | 0.04938983 | 0.1294177  |            |            |          |
| 0.2751452    | 0.03970678  | 1.2124270  | 0           | 0.6188877  | 1.6537220  | 0.2721922  |            |          |
| 1.0572770    | 0.09451417  | 1.6717390  | 0.06188428  | 0.07399686 | 0.06422584 | 0.05775866 |            |          |
| 0.7790259    | 0.2272472   | 0.1592896  | 0.1925289   | 0.1814408  | 0.1514062  |            |            |          |
| 0.5754553    | 0.8007287   | 0.4117449  | 0           | 0.03641527 | 0          | 0.3103450  | 0.5630631  |          |
| 0.1255118    | 0.0994886   | 1.00472    | 0           | 0.9996691  | 0          | 0.3760057  | 0.1548836  |          |
| 1.3655180    | 0.6076029   | 0.2149159  | 0.1660792   | 0.1846636  | 1.9577930  | 0.488544   |            |          |
| 0.1045209    | 0.9057608   | 0.7022066  | 0.1551725   | 0.1317536  | 0.05102605 |            |            |          |
| 0.2311463    | 0.1533416   | 0.3359750  | 0.07381298  | 0          | 0.05604614 | 0.08904975 |            |          |
| 0.1480690    | 0.4149402   | 0.3843733  | 0.2833815   | 0.9056893  | 0.1055297  |            |            |          |
| 0.1459166    | 0.09139832  | 0          | 0.06349043  | 0          | 1.7019280  | 0.1514062  | 0.7634732  |          |
| 0.0389020    | 0.6835344   | 0.5574966  | 0.3724624   | 0.3032835  | 0.72357    | 0.4550682  |            |          |
| 0.1901809    | 0.5358710   | 0.3881965  | 0           | 0.1778677  | 0          | 0.2351719  | 0.06862415 |          |
| 0.04166957   | 0.05992253  | 0.06618024 | 0.2247905   | 0.6328341  | 1.8179770  | 0.1095095  |            |          |
| 0.6008848    | 0.1040234   | 0.06518218 | 0.09180184  | 0          | 0.1814408  | 0          |            |          |
| 0.03983943   | 0.6229629   | 0.2696514  | 0.04610447  | 0          | 0.1972781  | 2.011165   |            |          |
| 0.7086504    | 0           | 0.2494267  | 0           | 0.1585244  | 0.4835609  | 0.3004231  |            |          |
| 0.1655880    | 0.08186266  | 0.02151383 | 0.3106177   | 3.3660990  | 0.2140861  | 0.3518089  |            |          |
| 0            | 0.08126846  | 0.1135043  | 0.2339734   | 0.1825292  | 0.1046195  | 0.02538842 |            |          |
| 1.0626990    | 0.03004786  | 0.3293856  | 0.02945201  | 2.2336364  | 7.307750   | 0.07211486 |            |          |
| 0            | 0.1851019   | 0.1295521  | 0           | 0.02787281 | 0.1952405  | 0.7285030  | 0.04085092 |          |
| TCGA-E7-A7DV | 37          | 0          | 0.01147557  | 0          | 0          | 0.1486060  | 0.1408862  | 54.85301 |
| 0.1999061    | 0.1501294   | 0.2722531  | 0           | 0.01133962 | 2.7002470  | 0.06152121 |            |          |
| 0.9146555    | 0.01860407  | 1.7352570  | 0.0107657   | 0          | 0.0273485  | 0.1130025  |            |          |
| 0.09433252   | 2.9640335   | 2.5188     | 0.0792485   | 0.5921708  | 0.4754910  | 0.04119585 | 0          |          |
| 2.8227561    | 7.108790    | 0.05739809 | 0           | 0.1459404  | 0.04126549 | 0.01223486 |            |          |
| 0.4639776    | 0.1748463   | 0.2287109  | 0.2134780   | 0.0623462  | 0.0178425  | 0.38532    |            |          |
| 0.05309089   | 0.1318935   | 0.03640349 | 0.1080502   | 0.1781125  | 0.2311415  | 0          |            |          |
| 2.7104380    | 0.2947891   | 0.2130421  | 0.6729171   | 0.4427853  | 0          | 0.01125053 |            |          |
| 1.2430270    | 0           | 0.05125152 | 0           | 0.01489991 | 0.09487364 | 0.0688049  |            |          |
| 0.07989702   | 0.5560032   | 0.02035317 | 0.03074898  | 0.02431432 | 0.10921    |            |            |          |

|                     |                    |                            |                           |                    |            |                   |            |   |
|---------------------|--------------------|----------------------------|---------------------------|--------------------|------------|-------------------|------------|---|
| 1.8386850.1878055   | 1.1610550.0107889  | 0.0235490                  | 0.02772122                | 0.6083125          |            |                   |            |   |
| 0.4709043           | 0.02980286         | 0.03756966                 | 0.2326133                 | 0.02595273         | 0.5165828  | 0                 |            |   |
| 0                   | 0                  | 1.6708590                  | 0.3070256                 | 0.02031505         | 0          | 0.4051210.1230424 |            |   |
| 1.3931460.1423238   | 0.1251720.02716587 | 0.0502051                  | 0.9706319                 | 0                  |            |                   |            |   |
| 0.8393995           | 0                  | 1.4380220.04842964         | 0.05790875                | 0.03769658         | 0          | 0.8875832         |            |   |
| 0                   | 0.02432341         | 0                          | 0                         | 0                  | 0.0600456  | 0.6468515         | 0.06444499 | 0 |
| 0.1709880.2449602   | 0.03469586         | 0.09442375                 | 0                         | 0.07785818         | 0.4230733  |                   |            |   |
| 1.5215710.0312930   | 0                  | 0                          | 1.3600780.1907696         | 0.08409488         | 0.1299709  |                   |            |   |
| 0.2023206           | 0.2113293          | 0.05701362                 | 0.0357859                 | 0                  | 0.1831785  | 0                 | 0          | 0 |
| 0.1730265           | 0.1680037          | 0.02921429                 | 0.2946007                 | 0.4134345          | 1.1403810  |                   |            |   |
| 0.04966132          | 0.07216124         | 0.2487421                  | 0.1386061                 | 0.05906482         | 0.04424241 |                   |            |   |
| 0.3283020.7867954   | 0                  | 0                          | 4.5385490.02895438        | 0.03949602         | 1.030556   |                   |            |   |
| 0.01522204          | 0.2503440.7507296  | 0.2027708                  | 0                         | 0.08940857         | 0.9451118  |                   |            |   |
| 0.04961085          | 0.02588667         | 0.1155282                  | 0.04078285                | 0.06657218         | 0          | 0.245389          |            |   |
| 0.3759291           | 0.06521988         | 0                          | 0.08398637                | 0.1465978          | 0.1768735  | 0.2964            |            |   |
| 0.09641292          | 1.10703            | 0.01809045                 | 0.06801404                | 4.3991650.06163772 | 0.02839853 |                   |            |   |
| 0                   | 0.02877941         | 0.06500277                 | 0.04689441                | 0.03608062         | 0.03723652 | 0.1543867         |            |   |
| 0.02601496          | 0.4925649          | 0                          | 0.01774521                | 0                  | 0.06202932 | 0                 | 0.03501584 |   |
| 0.1666112           | 0                  | 0.008418189                | 0.07864497                | 0.1667250          | 0.01898758 | 0.4339296         |            |   |
| 0.0999419           | 0.04099692         | 0.09287876                 | 0.08332591                | 0                  | 0          | 0.3394495         | 2.045      |   |
| 0                   | 1.1006450.2996327  | 1.1123683.1788770.02257437 | 1.2629840                 | 0.1013854          |            |                   |            |   |
| 0.1340741           | 0                  | 0.2401019                  | 0.008029785               | 0.04795391         |            |                   |            |   |
| TCGA-XF-AAN1        | 941                | 1                          | 0.2047086                 | 0.4378232          | 0.08248842 | 0.2103912         | 0          |   |
| 120.36990           | 0.2314411          | 0.2490577                  | 0.1565678                 | 0.1573316          | 0.1450183  |                   |            |   |
| 0.3048485           | 1.1805010.04916612 | 0.06854614                 | 0                         | 0.1173611          | 0.1486312  |                   |            |   |
| 0.16262             | 0.1493193          | 0                          | 2.33352285.877650.1047174 | 0.04890519         | 0          |                   |            |   |
| 0.1633062           | 0.1439865          | 1.8759380                  | 0.2275342                 | 0.04886814         | 0.9160037  |                   |            |   |
| 0.08179114          | 0.07275107         | 0.3284417                  | 0.2772462                 | 0.05036904         | 0.03173464 |                   |            |   |
| 0.08753202          | 0.3006034          | 0.4699887                  | 0                         | 13.953410.1443086  | 0.2141632  |                   |            |   |
| 0.01412127          | 0.7330221          | 0.7114627                  | 8.2464990.3025607         | 0.8764395          |            |                   |            |   |
| 0.1407549           | 0                  | 1.1476730                  | 0.02229935                | 2.31445            | 0          | 0.2298312         | 0.7618813  |   |
| 0                   | 0                  | 0.3275645                  | 0.2045643                 | 0.3167231          | 0.1469384  | 0.01008536        |            |   |
| 0.3169226           | 0.1927709          | 0.2664159                  | 1.1814285.6547420.1720159 | 0.0353845          |            |                   |            |   |
| 0.02848364          | 0.2845090.07494882 | 0.05144015                 | 0.4381282                 | 0.0864691          |            |                   |            |   |
| 0.2465195           | 0                  | 0.1323651                  | 0.2136483                 | 0                  | 0.1174972  | 0.4961996         | 0          | 0 |
| 0.1319140           | 0.01392415         | 0.4337884                  | 0.1172835                 | 0.0911101          | 0.2840809  |                   |            |   |
| 1.4644590.005346092 | 0                  | 0                          | 0                         | 3.3910840.9333658  | 0.1181428  | 0.07446574        |            |   |
| 0.3772278           | 0.2057606          | 1.0034260.08984115         | 0.06691488                | 0.1147793          |            |                   |            |   |
| 2.4797430.07535742  | 0.1521367          | 0                          | 0.07661039                | 0.6691488          | 0.1219394  |                   |            |   |
| 0.04619299          | 0.6582240          | 0.3230682                  | 0.2165808                 | 2.6405940.01835684 |            |                   |            |   |
| 1.2834640           | 0.5571942          | 0.1439865                  | 0.05738963                | 0.3735866          | 0.08959159 |                   |            |   |
| 1.2616870.4406144   | 0.1807902          | 0.1791832                  | 0.5628791                 | 0.1565678          |            |                   |            |   |
| 0.8331026           | 1.9231590          | 0.04969642                 | 0                         | 0.06936123         | 0          | 1.1853120.1297906 |            |   |
| 0.05144015          | 0.3401712          | 0.1675479                  | 0.06202495                | 0.08103762         | 0.05832364 | 0                 |            |   |

|              |             |            |            |            |             |             |
|--------------|-------------|------------|------------|------------|-------------|-------------|
| 0.6739427    | 1.29802     | 0.04167051 | 0.1545670  | 0.0572877  | 1.4660440   | 0.5051991   |
| 0.1519933    | 0.8551925   | 0.9076822  | 0.08023128 | 0.1486312  | 0.197871    |             |
| 1.4809240    | 0.2316192   | 0.06869643 | 0.08404684 | 0.1159137  | 0.1381284   |             |
| 0.2624861    | 0.6436292   | 0.3095735  | 0.2197818  | 0.3512121  | 0.2572287   |             |
| 1.2354210    | 0.07088566  | 0          | 0.1477235  | 0          | 0.2869482   | 0.3131357   |
| 0.1206847    | 0.5725380   | 0.4440627  | 0.1255957  | 0.1693563  | 0           | 0.05429794  |
| 0.2949967    | 0.3181171   | 0.2289851  | 0          | 0.1139575  | 0           | 0.7295677   |
| 0.4257818    | 0           | 0.1858961  | 0.1831137  | 0.05811347 | 0.7011516   | 1.057475    |
| 0.1910973    | 0.3883561   | 0.01792828 | 0.03370217 | 0.3987123  | 0.06108518  |             |
| 0.05628791   | 0.08487625  | 0.03327499 | 0.2147335  | 0.1858961  | 0           | 0           |
| 0.06120109   | 1.0828341   | 0.3099260  | 0.07034454 | 0          | 0.1639287   | 0.1250115   |
| 0.1487226    | 0.07338561  | 0.1269802  | 0          | 0          | 1.7844880   | 0.08301924  |
| 0.08600793   | 0.1980920   | 0.02708627 | 0.2261706  | 1.2268870  | 0.6896862   | 0.03938092  |
| 0.5466606    | 0.0579048   | 0.04660834 | 1.4435580  | 1.2598825  | 4.363260    | 0.5816721   |
| 0.03628006   | 0           | 0.5023828  | 0.02797309 | 0.04323455 | 1.34117     | 0.007957803 |
| 0.01584134   |             |            |            |            |             |             |
| TCGA-DK-AA6P | 457         | 0          | 0.4546871  | 0.2633768  | 0.06870698  | 0.5782950   |
| 50.950190    | 0.05507828  | 0          | 0          | 0.4305797  | 0.1585368   | 0.3554840   |
| 0.1740455    | 0.1175466   | 0          | 0.4887673  | 0.4126641  | 0.05643788  | 0.2176516   |
| 0            | 2.5002124   | 0.270750   | 0.08722218 | 0.04073454 | 0.1744444   | 0.1360224   |
| 1.83665      | 0           | 0.2368997  | 0          | 0.4015610  | 0.8856406   | 0.04039764  |
| 0.2020605    | 0.09089995  | 0.05286539 | 0.06861923 | 0.1325548  | 0.4404005   | 0           |
| 23.516580    | 0.3605964   | 0.1070296  | 0.01176201 | 0.6868746  | 0.2962989   |             |
| 3.4544570    | 0.4536208   | 2.2387030  | 0.1842324  | 0          | 0.5623115   | 0.9715888   |
| 0.04221312   | 5.5967560   | 0.0638110  | 0.2961433  | 0          | 0.03006498  | 0.1970496   |
| 0.2638078    | 0.3671676   | 0.01680077 | 0.3350439  | 0.1705997  | 0.3467273   |             |
| 2.1156970    | 0.9885180   | 0.07163848 | 0.01473639 | 0.01581656 | 0.08617299  | 0           |
| 0.2570759    | 0.3368581   | 0.1440452  | 0.2737776  | 0          | 0.1470010   | 0.164772    |
| 0.1204683    | 0.1468002   | 0.4821821  | 0          | 0          | 0.2197499   | 0.2665710   |
| 0.5754274    | 0.2442221   | 0          | 0.1591061  | 0.1326620  | 0.008905828 | 0.1166328   |
| 0.04576564   | 0.4393715   | 0.8206176  | 0.1476068  | 0.1860740  | 0.9775231   |             |
| 0.2570759    | 1.0745770   | 0.1496626  | 0.05573533 | 0.2868089  | 1.4947330   |             |
| 0.5702356    | 0.006707723 | 0.2552440  | 0.1114707  | 0.1015668  | 0.1453518   |             |
| 0.7048976    | 0           | 0.2690928  | 0.25353    | 1.0840030  | 0.2140592   | 0.2771570   |
| 0.5057534    | 0           | 0.04780148 | 0.1140960  | 0.07462342 | 1.3321210   | 0.07340008  |
| 0.1054098    | 0.09949789  | 0.1406515  | 0.1956148  | 0.9417420  | 0.4838935   |             |
| 0.05319689   | 0           | 0.09409608 | 0.05777297 | 0.4582419  | 0.6235458   | 0.1621595   |
| 0.04284598   | 0.3953559   | 0.2093332  | 1.0332470  | 0.4049914  | 0.04857944  |             |
| 0.1500806    | 0.4009616   | 1.9930920  | 0.2776685  | 0.04291443 | 0.5725989   |             |
| 1.9188880    | 0.4041845   | 0.1097196  | 0.8140736  | 1.4112650  | 0.1336539   | 0.154749    |
| 0.09888747   | 1.1685830   | 0.07924611 | 0.1929223  | 0.03814616 | 0.1575113   |             |
| 0.1448217    | 0           | 0.1503096  | 0.5360973  | 0.3056032  | 0.2745938   | 0.9263597   |
| 0.4236370    | 0.8247851   | 0.4132989  | 0.3858446  | 0.2871008  | 0           | 0.5258163   |
| 0.8473748    | 0.02513043  | 0.6499744  | 0.3374276  | 0.8159757  | 0.2507765   |             |

|              |             |            |            |            |            |                      |
|--------------|-------------|------------|------------|------------|------------|----------------------|
| 0.09840451   | 0.04522631  | 0.2457113  | 0.2222320  | 0.4026486  | 0.4039764  |                      |
| 0.06244637   | 0           | 1.0127970  | 0.05383653 | 0.3096764  | 0.1871844  | 0.3388307            |
| 0.1752028    | 1.1254680   | 0.1591704  | 1.0512870  | 0.1791958  | 0.08421452 | 1.17816 0            |
| 0.2344191    | 0           | 0.01979693 | 0.2951152  | 0.1548382  | 0.05956636 | 0 0                  |
| 0.3328527    | 0.6201284   | 0          | 0.2050720  | 0.04857944 | 0.1706762  | 0.1041257            |
| 0.1321337    | 0.1833750   | 0          | 0.6373814  | 0.4040050  | 0.2420219  | 0.1097147 0          |
| 0.3449927    | 0.1353656   | 0.6308673  | 0.7664322  | 0          | 0.09840451 | 0.5744155            |
| 0.09646115   | 0.3105714   | 0.3309925  | 0          | 1.5740883  | 0.4720560  | 0.1801314            |
| 0.2115309    | 0           | 0.4184491  | 0.06989878 | 0.0360113  | 0.2522482  | 0                    |
| 0.3298678    |             |            |            |            |            |                      |
| TCGA-CF-A47Y | 373 0       | 0.2044080  | 0.1502807  | 0          | 0.2599768  | 0 70.459660          |
| 0.2507036    | 0.4896124   | 0          | 0.1262415  | 0.2545407  | 0.2397157  | 1.18403              |
| 0.0828460    | 0.05888325  | 0.09072951 | 0.2337118  | 0.1391372  | 0.1522324  |                      |
| 0.1258032    | 0           | 3.1612191  | 0.12143130 | 0.04117195 | 0.1648127  | 0.1176342            |
| 0.1834497    | 0.1617471   | 0.5712560  | 0.04232631 | 0.03195002 | 0.1097919  | 0.2978658            |
| 0.1020888    | 0.1089664   | 0.5534315  | 0.2011409  | 0.1556004  | 0.01188302 |                      |
| 0.05350251   | 0.1092501   | 0.06599512 | 0.02955246 | 12.866340  | 0.4052720  | 0.1443479            |
| 0.03965775   | 2.5732470   | 0.1998051  | 9.7079130  | 0.1019643  | 0.5579098  | 0.1129405            |
| 0            | 1.0238050   | 0.1965533  | 0.05009987 | 1.8031790  | 0.2151503  | 0.427929             |
| 0.1097919    | 0.01474466  | 0.3134551  | 0.1531980  | 0.5336855  | 0          | 0.02832342           |
| 0.3628609    | 0.2436174   | 0.2899254  | 0.6303984  | 8.78335    | 0.04830842 |                      |
| 0.04968639   | 0.07999261  | 0.2324383  | 0          | 0.3178186  | 0.2082260  | 0.1942698            |
| 0.2307727    | 0           | 0.04956405 | 0.07555599 | 0.08123614 | 0.09899267 | 0.2322520            |
| 0            | 0.09632048  | 0          | 0.01564167 | 0.4376635  | 0          | 0.05117418 0.1595609 |
| 1.17507      | 0.006005523 | 0.2883824  | 0          | 0.1851686  | 4.8251992  | 0.3299880 0.1658943  |
| 0.1359328    | 1.2830450   | 0.08667779 | 0.9201605  | 0.05046145 | 0.03758436 |                      |
| 0.03223427   | 3.4178760   | 0.2539578  | 0.5981586  | 0.01809304 | 0.1721203  |                      |
| 0.6013497    | 0.4451863   | 0.07207057 | 0.3697073  | 0          | 0.06048634 | 0.3222023            |
| 1.0488010    | 0.02062113  | 0.4672425  | 0.04117195 | 1.8737570  | 0.02695783 | 0.6769196            |
| 0.1538782    | 0.2012851   | 1.29754    | 0.04949634 | 0.2707871  | 0.06709503 |                      |
| 0.5374628    | 0.2638203   | 0.6684745  | 4.2194860  | 0          | 0          | 0.1168752            |
| 0.1545046    | 0.9811189   | 0.2187001  | 0.0577852  | 0.2710462  | 0.3764293  |                      |
| 0.1045134    | 0.2275837   | 0.7534542  | 0.06746987 | 0.8111489  | 0.6815165  |                      |
| 0.04681049   | 0.23151     | 0.2574161  | 1.6468780  | 0.3770984  | 0.2674948  | 0.3087896            |
| 0.9176788    | 0.09012766  | 0.06261173 | 0          | 0.8668198  | 0.2404734  | 0.2276654            |
| 0.01286167   | 0.1062156   | 0.1139350  | 0.1842895  | 0.4016776  | 0.296239   |                      |
| 0.1851686    | 0.2301445   | 0.1214935  | 1.26068    | 0.2388878  | 0.1626181  |                      |
| 0.08297248   | 0           | 0.2256399  | 0          | 0.5848081  | 0.01694636 | 0.4097164            |
| 0.5994795    | 0.3103929   | 0.06341538 | 0          | 0.06099549 | 0.1656920  | 0.2074972            |
| 0.4144261    | 0.1816106   | 0.1195920  | 0.03189377 | 0.3927051  | 0.2989383  |                      |
| 0.3267353    | 0.3654456   | 0.5999595  | 0.1305633  | 1.7328020  | 0.9239316  |                      |
| 0.1788906    | 0.7089210   | 0.01006985 | 0.1892963  | 0.3839080  | 0.1029299  | 0.2213082            |
| 0            | 0.05873906  | 0.5487766  | 0.02610326 | 0          | 0.2487276  | 0 0.6806043          |
| 0.3708345    | 0           | 0.05926606 | 0          | 0.2301863  | 0.3510787  | 0.08910253           |

|              |            |            |             |            |             |            |                |
|--------------|------------|------------|-------------|------------|-------------|------------|----------------|
| 0.0206094    | 0.1426430  | 0.01874357 | 0           | 1.3364010  | 0.06994463  | 0.03170769 |                |
| 0.04830842   | 0.1719521  | 0.09508534 | 0.2895197   | 1.1529350  | 0.2734439   |            |                |
| 0.04423848   | 0.3448352  | 0          | 0.2356083   | 0.7014864  | 0           | 2.5475157  | 8.22426        |
| 0.1926752    | 0.02037757 | 0          | 0.2821754   | 0.0392794  | 0           | 1.3122010  | 0.0536363      |
| 0.1156697    |            |            |             |            |             |            |                |
| TCGA-CF-A3MI | 370        | 0          | 0.01361513  | 0.1747172  | 0           | 0.1259377  | 0 54.062660    |
| 0.04947783   | 0.4969433  | 0          | 0           | 0.1356347  | 0.1459831   | 2.113720   | 1.103635       |
| 0.02172224   | 0.06446159 | 0          | 0.2075941   | 0.05678308 | 0.02234519  | 0.05596014 |                |
| 2.07984466   | 7.07840    | 0.06268262 | 0.0439111   | 0.1253652  | 0.09775315  | 0          |                |
| 1.4184180    | 0.04510805 | 0.1702491  | 0           | 0.2308669  | 0.1142382   | 0.1306438  |                |
| 0.7470849    | 0.1936157  | 0.1256263  | 0.006331993 | 0.03082096 | 0.05292283  | 0          |                |
| 0            | 11.090820  | 0.1295721  | 0           | 0.04226411 | 0.7130148   | 0.1064683  | 3.683429       |
| 0.1086656    | 0.2798007  | 0.1323995  | 0           | 0.8991397  | 0.03491184  | 0.04004438 |                |
| 0.8938077    | 0          | 0          | 0.9425097   | 0          | 0.005892638 | 0.05446562 | 0.04081659     |
| 0.2211845    | 0.3958001  | 0.03018488 | 0.0729639   | 0.1009666  | 0.119605    |            |                |
| 0.6364697    | 5.9757430  | 0.07722499 | 0           | 0.02273329 | 0.09289293  | 0          | 0.03079146     |
| 0            | 0          | 0.2459395  | 0           | 0.07923221 | 0.04736567  | 0          | 0.07033241 0 0 |
| 0.08180613   | 0.04737729 | 0          | 0.03333932  | 0.2019583  | 0.03510227  | 0          |                |
| 0.2697304    | 0.3130743  | 0          | 0           | 0          | 0.1973381   | 3.1575640  | 2.172729       |
| 0.1767971    | 0          | 0.2508934  | 0.09237439  | 0.1593532  | 0           | 0          | 0.06870551     |
| 1.5722340    | 0.3187352  | 0          | 0.3210065   | 0.2002723  | 0.1459830   | 0.0460843  |                |
| 0.2814322    | 0          | 0          | 0.1681851   | 0.7564436  | 0.02197638  | 0.04268146 | 0              |
| 0.6071954    | 0          | 0.1717638  | 0.1565371   | 0          | 0.6382231   | 1.7934770  | 0.06853862     |
| 0.03575231   | 0.03369328 | 0.04685982 | 0.1424815   | 1.1751630  | 0           | 0          |                |
| 0.04151881   | 0.2058235  | 1.6804280  | 0           | 0.06629567 | 0.0501461   | 0.0371274  |                |
| 0            | 0          | 0.1078561  | 0.7491977   | 0.4324059  | 0           | 0.2775659  | 0 0.8148741    |
| 0.3819868    | 0.06065425 | 0          | 0.8331026   | 0          | 0.06672666  | 0          | 0.4852223      |
| 0.1993270    | 0.02741391 | 0          | 0.1214229   | 0.0413410  | 0.1374809   | 0.08561529 |                |
| 0.4186566    | 0.3617866  | 0          | 0.09098467  | 0.1749981  | 0.04243131  | 0.06932225 |                |
| 0            | 0.1313350  | 0.2061165  | 0.09371965  | 0.2236061  | 0.0180601   | 0.2995578  |                |
| 0.3264341    | 0.1052521  | 0.2365410  | 0.1300084   | 0.2648723  | 0.04299832  |            |                |
| 0.1269146    | 0          | 0.04487738 | 0           | 0.4731031  | 0           | 0.1160696  | 0.1669128      |
| 0.1395032    | 0.1739302  | 0.8394021  | 0.1406648   | 0.1652279  | 0.09298614  |            |                |
| 0.08585324   | 0.06052115 | 0.3352667  | 0           | 0.06738655 | 0.05080591  | 0.06829034 |                |
| 0.1863786    | 0.0556376  | 0          | 0.08835811  | 0.03663425 | 0.3858163   | 0.4372495  |                |
| 0            | 0.08421482 | 0          | 0.1717201   | 0.1496608  | 0.02967453  | 0.1537471  | 0 0            |
| 0.1442031    | 0.8703636  | 0.02484717 | 0.01126385  | 0          | 0.08623673  | 0.06485407 |                |
| 0.1259377    | 0.07061539 | 0.02428459 | 0.09429181  | 0.3523956  | 0.03466113  |            |                |
| 0.2231936    | 1.1019660  | 0.02734596 | 0.9426879   | 4.7604450  | 0.05356647  | 0.02171681 |                |
| 0.05728857   | 0          | 0.05023308 | 0           | 0.4531983  | 0           | 0          |                |
| TCGA-G2-A2EL | 819        | 1          | 0.2407329   | 0.3805566  | 0.1138750   | 0.3872591  | 0.2730617      |
| 58.916880    | 0.4792555  | 0.4584311  | 1.9452720   | 0.1034265  | 0.05839087  |            |                |
| 0.5050108    | 1.04765    | 0.3676490  | 0.1410138   | 0.09910989 | 0.05891514  | 0.1139916  |                |
| 0.0561241    | 0          | 0.1290583  | 2.303717    | 36.570850  | 0.3373115   | 0          | 0 0.1127218    |

|                   |                           |                            |                    |                           |                          |                    |
|-------------------|---------------------------|----------------------------|--------------------|---------------------------|--------------------------|--------------------|
| 0                 | 0.9389651                 | 0                          | 0.2879343          | 0.08994974                | 0.6655474                | 0.4600134          |
| 0.1897060         | 0.2711057                 | 0.04249317                 | 0.03894183         | 0.3009094                 | 0.0488214                |                    |
| 0.2433067         | 0                         | 31.4578                    | 0.3652322          | 0.0197101                 | 0.01299624               | 0.3794755          |
| 0.4638033         | 10.984820.6404489         | 4.3557180.0277588          | 0.1115918          | 0.5747181                 |                          |                    |
| 0.1878697         | 0.02705277                | 0.4466254                  | 0                  | 0.2467742                 | 0.3038460                | 0.2400887          |
| 0.1646907         | 0.1568891                 | 0.8501796                  | 0.2704639          | 0.03712747                | 0.3870286                |                    |
| 0.04989741        | 0.3141507                 | 4.9472360.8352476          | 0.1978894          | 0.02442409                | 0                        |                    |
| 0.4403714         | 0.1034666                 | 0.1183549                  | 0.4652573          | 0.5172713                 | 0.1134398                |                    |
| 0.03202094        | 0.1015165                 | 0.1784209                  | 0.1331095          | 0.2433067                 | 0.4947236                |                    |
| 0.05189408        | 0                         | 0.07891296                 | 0.03272703         | 0.008543219               | 0.7799751                | 0.1619095          |
| 0                 | 0.2411636                 | 3.4176040.002460087        | 0.02147859         | 0                         | 0.2022725.097502         |                    |
| 0.5249478         | 0.2174609                 | 0.2484326                  | 0.3471744          | 0.1893679                 | 1.865815                 |                    |
| 0.1446963         | 0                         | 0.05281746                 | 2.26717            | 0.1733844                 | 0.8400966                | 0.003705794        |
| 0.1762673         | 0.8313819                 | 0.2805616                  | 0.08266387         | 0.8221354                 | 0.05708349               |                    |
| 0.09910989        | 0.07542065                | 0.8939741                  | 0.3547818          | 0.7437259                 | 0.2023869                |                    |
| 0.1610728         | 0.1546011                 | 0.3697222                  | 0.04011272         | 0.08245393                | 1.373778                 |                    |
| 1.0137780.2495803 | 0                         | 0.1554105                  | 0.5763770.1369161  | 0.6729469                 |                          |                    |
| 0.05877904        | 0                         | 0                          | 0.0638353          | 1.0759450.4880252         | 0.1194504                | 0.02367098         |
| 0.8263594         | 0.4625986                 | 0.4852096                  | 0.2610350.5367706  | 0.02763819                |                          |                    |
| 0.5316432         | 4.9628170                 | 0.2133792                  | 0.5535983          | 1.83112                   | 0.07647211               |                    |
| 0.3217335         | 1.0681532.7288690.1476787 | 0.6326534                  | 0.01821068         | 0.8321112                 |                          |                    |
| 0.06567127        | 0.3197495                 | 0.1211783                  | 0.2610593          | 0.06667433                | 0.2224667                |                    |
| 0.2113773         | 0.4936266                 | 0.6384097                  | 0.12642            | 0.7003346                 | 0.3873855                |                    |
| 0.4513268         | 0.1630957                 | 0.07993738                 | 0.04531819         | 0                         | 0.4753572                | 0.2521649          |
| 0.8704599         | 0.04165119                | 0.9445611.3551120          | 0.1818412          | 0.08154784                |                          |                    |
| 0.7121021         | 0.3393683                 | 0.4486039                  | 0.1678131          | 0.1487890.1959574         | 0                        |                    |
| 0.1538725         | 0                         | 0                          | 0.3421719          | 0.5489836                 | 1.1498980.6130271.432806 |                    |
| 0.3712869         | 2.2070450.1237496         | 0.03101715                 | 0.00218421         | 0                         | 0.3108211                | 0                  |
| 0.06124802        | 0.2075072                 | 0.3635577                  | 0                  | 0.1698136                 | 0.1126505                | 0.1186387          |
| 1.1635480         | 0.1132955                 | 0                          | 0.3205960.05752599 | 0.05018714                | 0.6922753                | 0                  |
| 0                 | 0.2673594                 | 3.3150530.1910130.04329553 | 0.03957788         | 0.2900389                 |                          |                    |
| 0.03427646        | 0.2323555                 | 1.4331420.01866881         | 0.05436523         | 0.5263291                 |                          |                    |
| 0.2931037         | 0.1286853                 | 2.25779                    | 0                  | 0.6667173                 | 7.0628490.05147413       |                    |
| 0.01669483        | 0.08808135                | 0.6935377                  | 0.03218063         | 0.01989505                | 0.8560609                | 0                  |
| 0.1385032         |                           |                            |                    |                           |                          |                    |
| TCGA-XF-AAMZ      | 1348                      | 1                          | 0.1120485          | 0.1198226                 | 0                        | 0.4404830.08597662 |
| 102.32240         | 0.1628752                 | 0.1022425                  | 0.1928214          | 0.05536056                | 0.4967243                |                    |
| 0.3003493         | 0.7269239                 | 0.0302753                  | 0.04469194         | 0.06631252                | 0.1313966                |                    |
| 0.4271097         | 0.1001375                 | 0                          | 0.2302678          | 2.51303853.045470.2192404 |                          |                    |
| 0.06022926        | 0                         | 0                          | 0.7093071          | 1.1348910.3712262         | 0.07005503               | 0.06018364         |
| 0.29687           | 0.1343067                 | 0.1194623                  | 0.08089857         | 0.1422679                 | 0.1447415                |                    |
| 0.01302762        | 0.1521885                 | 0.08710789                 | 0.2170557          | 0.06479804                | 6.922033                 |                    |
| 0.08886175        | 0                         | 0.01739107                 | 1.0155990.1460338  | 5.7847560.07452383        |                          |                    |
| 0.8635043         | 0.2971661                 | 0                          | 0.8522079          | 0.1436571                 | 0.04493913               | 2.9423110          |

|              |            |             |             |            |            |            |            |           |
|--------------|------------|-------------|-------------|------------|------------|------------|------------|-----------|
| 0            | 0.6255307  | 0.06018364  | 0.04041225  | 0.1195297  | 0.1679543  | 0.5200812  |            |           |
| 0.09048109   | 0          | 0.1050825   | 0.05935181  | 0.1640525  | 1.5277383  | 5.25042    |            |           |
| 0.0529616    | 0          | 0.03507907  | 0.1274136   | 0.1538389  | 0.1267024  | 1.037649   |            |           |
| 0.1064912    | 0.2024010  | 0.05433817  | 0.1851577   | 0          | 0          | 0.2036985  | 0          | 0         |
| 0.06498356   | 0.04379405 | 0.08574155  | 0.2869028   | 0.1444407  | 0.1122068  |            |            |           |
| 0.3558923    | 0.7300112  | 0.006583988 | 0.2299346   | 0          | 0.1353363  | 1.020872   |            |           |
| 0.1277209    | 0          | 0.05731775  | 0.4645754   | 0.0633512  | 0.3278575  | 0.05532201 |            |           |
| 0            | 0.2120349  | 1.8082490   | 0.4684104   | 0          | 0          | 0.5768639  | 0.1501747  |           |
| 0.1769882    | 0.3474157  | 0           | 0.06631252  | 0.1009253  | 8.327470   | 1.356444   |            |           |
| 0.6439693    | 0.1805509  | 0.3958924   | 0.1182179   | 0.4240698  | 0.6134548  | 0          |            |           |
| 1.2693280    | 0.2170557  | 0.1335915   | 0           | 0.06932147 | 0          | 1.4657271  | 1.6036510  | 0         |
| 0.2782571    | 0.08542194 | 0.08469339  | 0.6914716   | 0.07992193 | 0.0633512  |            |            |           |
| 0.3897101    | 0          | 0.4583215   | 0           | 0.1436571  | 0          | 0.4742830  | 7.019845   |           |
| 0.1539581    | 0.0634524  | 0.1411055   | 0.3868948   | 0.5812459  | 0.04991668 |            |            |           |
| 0.2256886    | 0.9688098  | 0.09880896  | 0.02288088  | 0.04873767 | 1.20949    |            |            |           |
| 0.2343434    | 0.1426255  | 0.0846032   | 0           | 0.1427536  | 0          | 0.3636732  |            |           |
| 0.9688098    | 0.4800998  | 0.06766814  | 0.2162679   | 0.0431987  | 0.6039481  |            |            |           |
| 0.08729934   | 0          | 0.1212861   | 0.4053184   | 0.07067829 | 0.1928214  | 0.8907415  |            |           |
| 0            | 0.4805194  | 0.3454017   | 0.4330972   | 0.09269825 | 0          | 0.2674828  |            |           |
| 0.1211012    | 0.07582794 | 0.2924516   | 0           | 0.07755883 | 0          | 0.3743751  | 0          |           |
| 0.0796016    | 0.2289406  | 0.2015958   | 0.2862789   | 0.6044531  | 0.129270   | 1.307479   |            |           |
| 0.5261086    | 0.1987164  | 0.08301191  | 1.3503450   | 0.07522955 | 0.2079644  | 0          |            |           |
| 0.09952254   | 0.1851188  | 0.1144703   | 0.08807361  | 0          | 0.0753723  | 0.6032796  |            |           |
| 0.9082591    | 0.1085279  | 0.08663293  | 0           | 0.1514150  | 0.06105318 | 0.09037816 |            |           |
| 0            | 0          | 0.5410181   | 0.9767508   | 0.1022425  | 0.02317456 | 0          | 0.02217822 |           |
| 0.0250186    | 0.2008084  | 0.3196293   | 0           | 0          | 0.3107265  | 0          | 0          | 0.1797791 |
| 0.05626232   | 0.3879023  | 1.8216390   | 0.09184093  | 0.08936153 | 0.1178671  | 0          |            |           |
| 0.06890061   | 0          | 0.5594535   | 0.009800444 | 0.1950943  |            |            |            |           |
| TCGA-DK-AA6L | 1163       | 1           | 0.05643116  | 0.4023097  | 0.2728709  | 0.3305867  |            |           |
| 0.1154681    | 17.171650  | 0.06553595  | 0.1777297   | 0.7552238  | 0.1294812  |            |            |           |
| 0.1115253    | 0.3035722  | 1.0588581   | 7.084750    | 0.2439616  | 0.1667279  | 0.04452943 |            |           |
| 0            | 0.04097255 | 0.1232792   | 0.06174336  | 0.3092537  | 3.22628    | 34.7904    |            |           |
| 0.02598032   | 0.3033335  | 0.6062075   | 0.2025807   | 0.2381529  | 3.837665   |            |            |           |
| 0.1246408    | 0.3292979  | 0.08082767  | 1.5549360   | 0.3231740  | 1.403849   | 3.042149   |            |           |
| 0.1719614    | 0.08331014 | 0.1574668   | 0.08090509  | 0.07311713 | 0.5344343  | 0          |            |           |
| 7.7019680    | 0.2386857  | 0.07084497  | 0.05839127  | 1.4397430  | 1.470945   | 2.472688   |            |           |
| 0.4003472    | 0.1449627  | 0.0498874   | 0           | 1.1584880  | 0.9646702  | 0.04526553 |            |           |
| 0.6791769    | 0.1333657  | 0           | 0.8821035   | 0          | 0.04070576 | 0.2257459  |            |           |
| 0.6766967    | 0.3928939  | 0.06075884  | 0.1084274   | 0.1411277  | 0.1494572  |            |            |           |
| 0.2891769    | 1.5144081  | 5.588190    | 0.07112835  | 0.1463145  | 0.1256315  | 0.06416952 |            |           |
| 0.06198249   | 0          | 0.5295606   | 0           | 0.1359140  | 5.179249   | 0.1459542  | 0.07852737 |           |
| 0.5980522    | 0.1457548  | 0.4103558   | 0           | 0.1130217  | 0.2181851  | 0.02940808 |            |           |
| 0.01535365   | 0.5646864  | 0           | 0.07534783  | 0.2794907  | 2.1626860  | 0.06631808 | 0          |           |
| 0            | 0.1817591  | 3.087282    | 0.0154940   | 0.04885189 | 0.2309362  | 0.3639608  | 0.340327   |           |



|              |            |            |            |            |            |                     |
|--------------|------------|------------|------------|------------|------------|---------------------|
| 0.5419303    | 0.1857460  | 0.1423833  | 3.29198    | 0.2492816  | 0.3145416  |                     |
| 0.01331992   | 0.0633566  | 0.4427076  | 0.8571705  | 4.5502220  | 0.3888211  | 0                   |
| 0.1335883    | 0.5228127  | 1.8250040  | 0.03036213 | 0.4717429  | 0.1818623  |                     |
| 2.1681150    | 0.1190765  | 0.1898443  | 0.5973133  | 0          | 1.01402    | 0.2915096 0.34388   |
| 0.04939469   | 0.1396499  | 0.3884436  | 0.8858235  | 0.8449252  | 0          | 0.08219763          |
| 0            | 0          | 0.3981064  | 0.9286583  | 0.2146731  | 0.2127044  | 0.3794559           |
| 0.2078426    | 0.05129448 | 0.1340358  | 0.6752691  | 0          | 0.1592426  | 1.232145            |
| 0.03446141   | 0.3408707  | 0.9475357  | 0.8660107  | 0.2418833  | 0.2178767  |                     |
| 0.1515519    | 2.1018230  | 0.07682353 | 0.06545553 | 0.5156719  | 0.1573636  |                     |
| 0.6225327    | 0.06628041 | 0          | 0.5272317  | 0.05711591 | 0.09497045 | 0.4139954           |
| 0.3698017    | 0.3635180  | 0.3388601  | 0.25624    | 0.6317320  | 0.5862226  | 0.1436614           |
| 0.04072234   | 0.3628997  | 0.5695330  | 1.8535790  | 0.07485443 | 0.5155753  |                     |
| 0.2963681    | 0.3739224  | 0.09337152 | 0.2442594  | 0.9878937  | 0.1219808  |                     |
| 0.0424326    | 0.4909595  | 0.06684995 | 0.4067311  | 0          | 0.7039092  | 0.08803013          |
| 0            | 0.5380747  | 0.1101342  | 0.09611939 | 0.9857461  | 1.3117930  | 0.263395            |
| 1.3970870    | 0.1186131  | 0.05574322 | 0.1334638  | 0.2525865  | 0.2327498  | 0                   |
| 0.05110548   | 0.6126651  | 0.1537356  | 0.0591422  | 0.3051846  | 0          | 0.7249292           |
| 1.1123490    | 0.2186322  | 0.1745243  | 0          | 0.1016765  | 0.2067685  | 0.2213878           |
| 0.4855177    | 0          | 0.02759765 | 0          | 0.9838450  | 0.03432835 | 0.04668576 1.209182 |
| 0.1787144    | 0.1400017  | 0.2566397  | 0.8975596  | 0          | 0.09770377 | 0.4312214           |
| 0.04788713   | 0.1541799  | 0.8987175  | 0          | 2.2922226  | 0.0685740  | 0.1295112           |
| 0.2100246    | 0.1582975  | 0.1661877  | 0.06940103 | 0.03575487 | 0.1610048  |                     |
| 0.006581083  | 0.05240301 |            |            |            |            |                     |
| TCGA-XF-A9T4 | 495 1      | 0.08073654 | 0.04796565 | 0          | 0.1078711  | 0.04130029          |
| 53.717560    | 0.1043198  | 0.1473416  | 0.1234999  | 0.03545781 | 5.717697   |                     |
| 0.1202315    | 0.3325618  | 0.03393424 | 0.05406884 | 0.02123621 | 0          | 0.2149392           |
| 0.0481027    | 0.4564065  | 0.07374197 | 1.16156830 | 0.808040   | 0.06608047 | 0.1832368           |
| 0.04130029   | 0.09661132 | 0          | 0.3504625  | 0.5349739  | 0.04486945 | 0.09636735          |
| 0.9126809    | 0.02508972 | 0.07651423 | 0.2072585  | 0.1731299  | 0.03641994 |                     |
| 0.1335047    | 0.06599871 | 0.01394791 | 0.06951088 | 0.3942732  | 1.394140   | 0.1422874           |
| 0.1689308    | 0.01113878 | 0.1445510  | 0.2338325  | 2.8834130  | 0.07159751 | 0.5530648           |
| 0.1903315    | 0          | 0.2928841  | 0.9661132  | 0.02158726 | 0.2944558  | 0                   |
| 0.1208598    | 0.1602581  | 0          | 0.00129418 | 0.05981047 | 0.05378643 | 0.312287            |
| 0.4346409    | 0.01193292 | 0.04807442 | 0.06177302 | 0.09850664 | 0.3727616  |                     |
| 0.4956035    | 0.1187246  | 0.04884445 | 0          | 0.06120525 | 0.05911924 | 0.08115145          |
| 0.1196284    | 0.1705160  | 0.2268623  | 0          | 0.1566134  | 0.1654038  | 0.1140851           |
| 0.04634058   | 0.09784993 | 0.1779090  | 0.04162124 | 0.05609919 | 0.00183055 |                     |
| 0.2978147    | 0.02312816 | 0.03593359 | 0.2066959  | 1.1826620  | 0.2171740  | 0                   |
| 0.02167034   | 0.8024608  | 0.2454114  | 0.2096784  | 0.1064630  | 0.2066356  |                     |
| 0.1014393    | 0.2422951  | 0.1240159  | 0          | 0.06790297 | 0.5662130  | 0.1800069           |
| 0.03493768   | 0          | 0.02639106 | 0.07213889 | 0.5080909  | 0.1112579  | 0                   |
| 0.06370863   | 0.07156719 | 1.0935160  | 0.6936745  | 0.02891021 | 0.4282424  |                     |
| 0.1135758    | 0          | 0.1031391  | 0          | 0.5536742  | 0.1737772  | 0.08794061          |
| 0.07066939   | 0.06659943 | 0.1234999  | 0.3285736  | 0.5372630  | 0          | 0.02227757          |

|              |            |            |             |            |            |            |
|--------------|------------|------------|-------------|------------|------------|------------|
| 0.02735589   | 0.1898581  | 0.2460443  | 0           | 0.1014393  | 0.3744074  | 0.03304023 |
| 0.2201623    | 0.1917662  | 0.0230027  | 0.02368806  | 0.4176877  | 0.5720326  |            |
| 0.04930423   | 0.1625622  | 0.2937236  | 0.2478018   | 0.2097360  | 0.06793853 |            |
| 0.3131939    | 0.4534509  | 0          | 0.05861977  | 0.01560796 | 0.2028884  | 0.05628536 |
| 0            | 0.08579671 | 0.03314786 | 0.2628673   | 0          | 0.04529168 | 0.1974356  |
| 0.4024613    | 0.04334068 | 0.04617238 | 0.03458535  | 0.3049942  | 1.0064560  |            |
| 0.03884119   | 0.2163349  | 0.2489776  | 0.3704997   | 0.3322750  | 0.2023904  |            |
| 0.5192664    | 0.04953462 | 0.1261659  | 0.0465952   | 0.2141497  | 0.1939099  |            |
| 0.04047245   | 0.1638980  | 0.1594046  | 0.03075153  | 0.02239523 | 0.08392407 |            |
| 0.04198182   | 0          | 0.03665847 | 0.1181775   | 0.3896366  | 0.02765324 | 0.5097464  |
| 0.1674851    | 0.4748166  | 0.01414173 | 0.0265841   | 0.2452368  | 0.1927347  |            |
| 0.06659943   | 0          | 0.1612325  | 0.1778497   | 0.05498771 | 0.08461524 | 0.2619781  |
| 0.09655021   | 0.5694224  | 0.5013956  | 0           | 0.2358215  | 0          | 0.1777959  |
| 0.04301426   | 0.1013008  | 0.05008067 | 0.04606489  | 0          | 0.5734647  | 0.06548515 |
| 0.02968609   | 0.8819540  | 0.1136392  | 0.1735948   | 0.1763277  | 0.2977730  | 0.06400247 |
| 0.01553173   | 0.1359948  | 0.5709376  | 0.01838221  | 0.4190053  | 0.7747608  |            |
| 0.2732918    | 2.6895620  | 0.05882308 | 0.3863366   | 0          | 0.0396277  | 0.02758129 |
| 0.0170516    | 0.1279727  | 0          | 0.03748671  |            |            |            |
| TCGA-K4-A6MB | 469        | 0          | 0.02363523  | 0.2148382  | 0.04285774 | 0.2404842  |
| 0.01813569   | 21.284780  | 0.1975498  | 0.1725341   | 0.2440395  | 0.2452299  |            |
| 1.1655050    | 0.2534197  | 0.7666774  | 0.5555990   | 0.1445505  | 0.02797559 | 0.3048812  |
| 0.5405606    | 0.09857281 | 0.1745560  | 0.09714422  | 4.753487   | 23.153890  | 0.07072919 |
| 0.1143415    | 0.1632212  | 0.2121187  | 0.5236681   | 2.2058180  | 0.1957638  |            |
| 0.08866338   | 0.05077993 | 0.4759196  | 0.2266425   | 0.08819673 | 0.5801943  |            |
| 0.2040655    | 0.1003175  | 0.08244036 | 0.1939511   | 0.06431011 | 2.106119   |            |
| 0.02733667   | 25.297360  | 0.4123740  | 0.1335249   | 0.02201057 | 0.5712742  | 0.400452   |
| 3.1770870    | 0.1257589  | 0.5160787  | 0.4492315   | 1.1969560  | 0.7453569  | 0.4242374  |
| 0.05792934   | 1.2412870  | 0.1194112  | 0.4486227   | 0.1269498  | 0.1125228  |            |
| 0.3151660    | 0.2125672  | 0.6856538  | 0.2672019   | 0          | 0.2026591  | 0.1940526  |
| 0.2854897    | 0.9514262  | 3.6634090  | 0.1117159   | 0.06434539 | 0.2515827  |            |
| 0.2418868    | 0.05192061 | 0.08017884 | 0.6653922   | 0.04492595 | 0.4055926  |            |
| 0.54231      | 0.2292391  | 0.09866955 | 0           | 0.1526173  | 0.3007735  | 0          |
| 0.1439284    | 0.01847561 | 0.1133396  | 0.2545953   | 0.1828078  | 0          | 0.4606052  |
| 1.0507330    | 0.04999715 | 0.2182582  | 0           | 0.9135198  | 1.3703461  | 0.184147   |
| 0.1209046    | 0.3157661  | 0.1870842  | 0.0534440   | 0.1400338  | 0.06953269 | 0.0894522  |
| 2.4496120    | 0.03915275 | 0.7904424  | 0.004184114 | 0.1592152  | 2.2945790  | 0.2534197  |
| 0.7093352    | 0.8305406  | 0.1289029  | 0.1398779   | 0.1459808  | 2.302915   |            |
| 0.06676246   | 0.3704652  | 0.5331893  | 0.6420878   | 0.02493657 | 1.461053   |            |
| 0.3623217    | 0.04654827 | 1.9665681  | 0.0072740   | 0.2129114  | 0.03103218 | 0.3509399  |
| 0.1220197    | 0.9275301  | 0.7181733  | 0.06636585  | 0.02582031 | 0.02934742 |            |
| 0.1441495    | 0.1429201  | 0.5186036  | 0           | 0.08017884 | 0.4891165  | 0.04352566 |
| 0.2578058    | 0.2105198  | 0.09090802 | 0           | 0.7503304  | 1.0731760  | 0.1299022  |
| 0.3212277    | 0.5059954  | 0.9793273  | 0.6838336   | 0.6054346  | 0.1904247  |            |
| 0.7231139    | 0.3334802  | 0.05791721 | 0.0205612   | 0.7289338  | 0.07414769 |            |

|              |             |             |            |            |            |             |            |
|--------------|-------------|-------------|------------|------------|------------|-------------|------------|
| 0.09025518   | 0.05948661  | 0.03275058  | 0.2408967  | 0.07176607 | 0.1789954  |             |            |
| 0.4830286    | 0.3395558   | 0.3996649   | 0.7603166  | 0.5285089  | 2.729199   |             |            |
| 0.3682940    | 0.03008506  | 0.2046703   | 0.1709937  | 0.6261654  | 0.2440395  |             |            |
| 0.4542414    | 0           | 0.4054382   | 0.6921526  | 1.1745830  | 0.1075444  | 0.09207351  |            |
| 0.08463322   | 0.6641644   | 0.1172963   | 0.3304768  | 0.1679938  | 0.08413746 | 0           |            |
| 1.6899520    | 0           | 0.1931686   | 0.5203797  | 0.5736760  | 0.5100072  | 0.4273284   |            |
| 0.1544459    | 0.3329280   | 0.2887597   | 0.3502064  | 2.9840220  | 0.1462249  | 0           |            |
| 0.07162328   | 0.2956528   | 0.2414608   | 0          | 0.0383464  | 0.03179768 | 0.2612061   |            |
| 0.9962466    | 0.2289259   | 0.2558378   | 0          | 0.1916346  | 0          | 0.09787586  |            |
| 0.2478338    | 0.06597393  | 0.01733821  | 0.3018684  | 2.5754170  | 0.0647003  |             |            |
| 0.01955353   | 0.4021771   | 0.1497030   | 0.08091952 | 0.7023232  | 0.4167892  |             |            |
| 0.1264708    | 0.02046078  | 0.8477005   | 0.1203402  | 0.04843173 | 0.6025409  |             |            |
| 0.04747133   | 0.8509606   | 3.6329280   | 0.1666051  | 0.09424847 | 0          | 0.469833    |            |
| 0.05813488   | 0           | 1.3149650   | 0.1563802  |            |            |             |            |
| TCGA-UY-A8OB | 2109        | 0           | 0.01965146 | 0.02101491 | 0          | 0.1272409   | 0          |
| 33.580540    | 0.02856562  | 0.2510429   | 0          | 0          | 0.6264609  | 0.1053526   |            |
| 0.3278325    | 0.0424783   | 0.1149606   | 0.09304095 | 0.01843584 | 0.04280455 | 0           |            |
| 0            | 0.3230813   | 1.0879862   | 4.995540   | 0.09952059 | 0.4436551  | 0.4523663   | 0          |
| 0.5402546    | 0.06510693  | 0           | 0          | 0.4581815  | 0.05496206 | 0.2095170   | 0.3972716  |
| 0.0798446    | 0.06527639  | 0.1827863   | 0.05783125 | 0          | 0.1522719  | 0           |            |
| 0.7622854    | 0           | 0.07401266  | 0          | 0.3166564  | 0.6659098  | 3.6415490   | 0.05228098 |
| 0.4543331    | 0.01737267  | 0           | 0.1895630  | 0.0140117  | 1.0320650  | 0.06618946  |            |
| 0.2194155    | 0           | 0.002835056 | 0.06289057 | 0          | 0.1368204  | 0           | 0.01742699 |
| 0.01053128   | 0.0416373   | 0.1007023   | 0.0510362  | 0.3618930  | 0.03715435 | 0           |            |
| 0.0164061    | 0.04469249  | 0.02158464  | 0.08888601 | 0.2038248  | 0.07470714 |             |            |
| 0.1419912    | 0           | 0.03812006  | 0.05469237 | 0.2499172  | 0          | 0.1429014   | 0          |
| 0.03419112   | 0           | 0           | 0.1388083  | 0          | 0          | 0.2539022   | 0.3615018  |
| 0.04032672   | 0           | 0           | 0.6510693  | 0.4032024  | 0.0510362  | 0.0241262   |            |
| 0.1629577    | 0.04444301  | 0.2476957   | 0.03881026 | 0          | 0          | 1.8887270   |            |
| 0.3286057    | 0.006957744 | 0.06618946  | 0.05781279 | 0.0526763  | 0.7538479  |             |            |
| 0.1624826    | 0           | 0.04652048  | 0.0657451  | 5.318020   | 0.5133708  | 0.06333128  |            |
| 0.8208520    | 0.1658676   | 0.2479161   | 0.2151797  | 0.0774049  | 0.6294746  | 0           |            |
| 0.0676859    | 0           | 0.0972627   | 0.06763535 | 0.05141285 | 0.7615488  | 0.3310784   |            |
| 0            | 0           | 0           | 0.2970764  | 0.1616969  | 0          | 0           | 0.3075691  |
| 1.2304360    |             |             |            |            |            |             |            |
| 0.1400290    | 0.1007803   | 0.05189155  | 0.4159069  | 0.2535468  | 0          | 0           | 0.346466   |
| 0.5428396    | 0.1493219   | 0.03501824  | 0          | 0.1045620  | 0.03210342 | 0.06838224  |            |
| 0.3771104    | 0.0821999   | 0.0500283   | 0.1187040  | 0.4538398  | 0.02503663 | 0           |            |
| 0.1133907    | 0.1235732   | 0.1882153   | 0.1424145  | 0          | 0.07071247 | 0.5459083   |            |
| 0.3674606    | 0           | 0           | 0.09478151 | 0.09916642 | 0          | 0.5150154   | 0          |
| 0.1722145    |             |             |            |            |            |             |            |
| 0.06730861   | 0           | 0.0812887   | 0.2551810  | 4.925766   | 0          | 0.008865977 | 0.1465462  |
| 0            | 0.07772877  | 0           | 0.1575821  | 0.1839324  | 0          | 0.1606096   | 0.03116172 |
| 0.3012515    | 0.1211555   | 0.2030293   | 0.4402754  | 0.5032950  | 0.01548959 |             |            |
| 0.02911783   | 0.03280738  | 0.05277607  | 0          | 0          | 0.1560647  | 0.3061153   |            |
| 0.0401524    | 0.06178662  | 0.06376605  | 0.05287621 | 0.03341219 | 0.7949510  | 0           |            |

|              |             |            |            |            |            |             |           |
|--------------|-------------|------------|------------|------------|------------|-------------|-----------|
| 0.1007803    | 0.07081516  | 0          | 0.0342647  | 0.0951050  | 0.1097077  | 0.08649487  | 0         |
| 0.2855099    | 0           | 0.04877322 | 4.0869790  | 0.0622351  | 0.02340186 | 0.1226966   |           |
| 0.1426923    | 1.1917430   | 0.08719405 | 0.6003396  | 0.04026845 | 1.9969180  |             |           |
| 0.3265519    | 0.9128154   | 0.05798656 | 0.1567253  | 0          | 0          | 0.01208403  | 0         |
| 0.2055824    | 0           | 0.04105957 |            |            |            |             |           |
| TCGA-ZF-A9R5 | 1090        | 0          | 0.9688755  | 0.3676476  | 0.05667294 | 0.9251035   | 0         |
| 94.317040    | 0.3520926   | 0.7129704  | 0.4302742  | 1.1118170  | 0.2023806  |             |           |
| 2.1782121    | 5352070     | 1942301    | 0.1218904  | 0.1479741  | 0          | 0.03403859  |           |
| 0.1582794    | 0.4360012   | 0          | 4.3823861  | 47.583     | 0.07913972 | 0.1343995   |           |
| 0.2877808    | 0.05609904  | 0          | 3.2334230  | 0.05177365 | 0.3517321  | 0           | 2.28547   |
| 0.2185318    | 0.3498809   | 0.2707836  | 0.5635020  | 0.1326548  | 0.02180301 |             |           |
| 0.1149699    | 0.3523106   | 0.4439897  | 0.03614865 | 43.824320  | 0.9418866  |             |           |
| 0.3531334    | 0.04850946  | 1.5108490  | 0.6517389  | 13.352460  | 0.7483382  | 0.609317    |           |
| 0.2210386    | 0           | 1.75093    | 0          | 0.01114224 | 2.6673020  | 0.0553978   | 0.4210759 |
| 0.8026138    | 0           | 0.01127232 | 0.4501006  | 1.2648970  | 0.4714707  | 0.05047636  |           |
| 0.04850339   | 0.8123336   | 0.3642142  | 0.4690366  | 2.3944846  | 7.628490   | 0.3840914   |           |
| 0.03646591   | 0           | 0.6930278  | 0.2403003  | 0.0706830  | 0.3241669  | 0.2970392   |           |
| 0.5927918    | 0           | 0.2728209  | 0.2065865  | 0.09936826 | 0.2421762  | 1.875003    |           |
| 0.3099178    | 0.1408419   | 0.3987735  | 0.02443122 | 0.01275529 | 1.1810840  |             |           |
| 0.06259639   | 0.3466043   | 2.5393150  | 0          | 0          | 0.1132493  | 2.27804     | 1.745654  |
| 0.08116894   | 0.2366198   | 1.0222860  | 0.2120491  | 1.6038980  | 0.1234491  | 0           | 0.1182871 |
| 1.8493960    | 1.553209    | 1.0452420  | 0.01106573 | 0.2105380  | 0.8734923  | 0.7121079   |           |
| 0.07757808   | 2.51955     | 0.2556822  | 0.1479741  | 0.5791131  | 1.7234870  | 0.1135072   |           |
| 0.8817926    | 0           | 0.9030517  | 0          | 0          | 0.08555645 | 0.1846593   | 1.599364  |
| 0.5448964    | 0.4388765   | 0.04103541 | 0.5027375  | 0.2151371  | 3.0254153  | 0.37204     |           |
| 0            | 0           | 0          | 0.7559615  | 3.0431290  | 0.2675145  | 0.1767075   | 0.3369795 |
| 0.4028931    | 0.5965917   | 0.5567618  | 0.4808489  | 0.08252931 | 0.9260528  |             |           |
| 1.6478790    | 1.145174    | 0.7079591  | 1.2201292  | 0.8778080  | 0.6165460  | 0.09746393  |           |
| 2.8957942    | 0.0787170   | 0.7165885  | 0.3318762  | 0.05437821 | 1.71361    | 0           | 0.5171788 |
| 0.08652834   | 0.1732309   | 0.2190030  | 0.1423498  | 0.4057621  | 0.9826661  |             |           |
| 0.2993411    | 0.3397480   | 0.4825943  | 0.3052552  | 1.1403520  | 0.09740273 | 0.1989149   |           |
| 0.2706458    | 0           | 1.4983040  | 0.05378427 | 1.0102110  | 1.6433590  | 0.5405969   |           |
| 0.08628941   | 0.4912757   | 0.08116894 | 0.03730492 | 0.1688957  | 1.177402   |             |           |
| 0.6292887    | 0.4442932   | 0.1957338  | 0          | 0.8771754  | 0.07313241 | 0           |           |
| 0.7663097    | 0.1200881   | 0.1197791  | 0.5415042  | 0.09886    | 0.6710465  | 0.947199    |           |
| 0.2833017    | 0.4399407   | 0.7174403  | 0.04196803 | 0.3093769  | 0          | 0.009797695 |           |
| 0.3688269    | 0.2554366   | 0          | 0.7099032  | 0          | 1.5233290  | 0.6152630   | 0.0724944 |
| 0.08014149   | 0.4786595   | 0.1717761  | 0.08855474 | 0.1008379  | 0.1744813  |             |           |
| 0.04585436   | 0.009735993 | 6.4479410  | 0.3137070  | 0.2844228  | 0.1181820  | 0.4454095   |           |
| 0.1814415    | 0.3685959   | 1.2968030  | 0.1951118  | 0.02705631 | 0.6760410  |             |           |
| 0.3202185    | 0.7689109   | 0          | 2.6400525  | 0.8598270  | 0.4918556  | 0.04985179  | 0         |
| 0.9664414    | 0.08648399  | 0.1188157  | 2.7048690  | 0.3047423  |            |             |           |
| TCGA-CU-A3KJ | 562         | 0          | 0.1445304  | 0.2181998  | 0.1233303  | 0.4167928   |           |
| 0.01304712   | 31.727080   | 0.4201827  | 0.3568563  | 0.4096542  | 0.05040642 |             |           |

|              |            |            |            |             |             |             |
|--------------|------------|------------|------------|-------------|-------------|-------------|
| 0.06775628   | 0.04557859 | 0.8037024  | 0.05972636 | 0.04370678  | 0.06037831  |             |
| 0.3270109    | 0.07407396 | 0.1063724  | 0.0418595  | 0.1747179   | 1.008631    |             |
| 23.300950    | 0.2074492  | 0.4752751  | 0.0782827  | 0.03052035  | 0           | 0.2460314   |
| 0.04252394   | 0.01826596 | 1.3334970  | 0.09511271 | 0.2538008   | 0.2946363   |             |
| 0.4490601    | 0.1160996  | 0.3400381  | 0.08468129 | 0.1454067   | 0           | 0.1573316   |
| 0.6351448    | 0.1887892  | 0.06404003 | 0.01055651 | 0.6849737   | 0.6648274   |             |
| 2.8516540    | 0.2940375  | 1.7035     | 0.1052229  | 4.35087     | 0.2775738   | 0.1308015   |
| 0.0181856    | 0.5581267  | 0.06027768 | 0.08590644 | 0.2468063   | 0.01826596  |             |
| 0.008585691  | 0.07935749 | 0.07646218 | 0.1381158  | 0.08238408  | 0.143249    |             |
| 0.1776893    | 0.03152363 | 0.2427289  | 1.0377480  | 0.4436020   | 0.2250367   | 0.006613021 |
| 0.02839102   | 0.09667632 | 0          | 0.2499553  | 0.1637638   | 0.4848071   | 0.3685769   |
| 0.3901468    | 0.4947553  | 0.04732301 | 0.1621821  | 0.2195908   | 0.7109675   |             |
| 0.08430445   | 0          | 0.07396035 | 0.4784998  | 0.008674296 | 0.5224566   | 0.06575747  |
| 0            | 0.1025224  | 2.7108670  | 0.04396184 | 0           | 0.05241538  | 0.02053754  |
| 0.3294922    | 0.1545582  | 0.1148146  | 0.4856681  | 0.1153642   | 3.192560    | 0.2854375   |
| 0            | 0.2145113  | 1.0915230  | 0.2535043  | 0.08529861  | 0.003010121 | 0.02863548  |
| 0.1250574    | 0.2506822  | 0.3472394  | 0.5272101  | 0           | 0.04025221  | 0.1531556   |
| 0.7261522    | 0.2470116  | 1.5458090  | 0.2465905  | 1.9999110   | 0.2332172   | 0.08580453  |
| 0.02327324   | 0.0669752  | 0.7439229  | 0.1976317  | 0.1396568   | 0.02232507  |             |
| 0.3366293    | 0.2048271  | 1.1121341  | 0.14565    | 0.1193617   | 0           | 0.08445209  |
| 0.3598668    | 0.3264555  | 0.1940529  | 0.05768199 | 1.0201520   | 0.3444439   |             |
| 0.5332257    | 1.0904510  | 0.4142047  | 0.08979915 | 0.3598668   | 0.5252543   |             |
| 0.01557563   | 0.2118385  | 0.4496737  | 0.2739895  | 0.2882198   | 0.03787476  |             |
| 0.8219684    | 0.4523653  | 0.0299889  | 0.1944441  | 0.01479207  | 0.2097628   |             |
| 0.1955913    | 0.2597243  | 0.05991392 | 0.1020990  | 0.3899365   | 0.05162971  |             |
| 0.1226402    | 0.5613443  | 0.2957099  | 0.2464505  | 0.2187938   | 0.1158136   |             |
| 0.3313510    | 0.3444439  | 0.08657477 | 2.1166210  | 0.08201045  | 0.7293385   | 0.02926101  |
| 0.7040814    | 0.02255479 | 0.5421425  | 0.3843794  | 0.09389047  | 0.309477    |             |
| 0.3532758    | 0.3145805  | 0.6615843  | 0.3106899  | 0.3518708   | 0           | 0.0751019   |
| 0            | 0.1590740  | 0.1932751  | 0.2084531  | 1.9164410   | 0.7168157   | 0.3144923   |
| 1.7347680    | 0.1031744  | 1.05241    | 0.0938174  | 0.02519443  | 0.1011281   | 0.2054921   |
| 0.1262360    | 0.06396453 | 0.7223690  | 0.1737109  | 0.1603841   | 0.05517408  |             |
| 0.1143789    | 1.7683381  | 0.6040790  | 0.03293862 | 0.2366408   | 0.02180025  | 0.2604118   |
| 0.2336344    | 0.1185912  | 0.2057259  | 0.04746274 | 0           | 0.2171692   | 1.43283     |
| 0.4189183    | 0.1828728  | 0.2571848  | 0.2490535  | 0.02277972  | 0.5426171   |             |
| 0.6966989    | 0.1971346  | 0.07359912 | 0.4086623  | 0.3246554   | 0.1045278   |             |
| 0.6487012    | 0.01707583 | 1.2950282  | 0.2330390  | 0.05574815  | 0.09492548  | 0.1073193   |
| 0.1502248    | 0.0575069  | 0.01616024 | 0.04851323 | 0.2201110   | 0.07697543  |             |
| TCGA-DK-AA6S | 5050       | 0          | 0.2568286  | 0.1569416   | 0           | 0.2714997   |
| 29.283550    | 0.2556567  | 0.1599984  | 0.7365348  | 0.2525541   | 0.1450206   |             |
| 2.3136540    | 0.2458702  | 0.2040241  | 0.1288757  | 0.2439030   | 0.34742     | 0.4216475   |
| 0.8790899    | 0.02185972 | 0.1204309  | 0.0754002  | 5.11141338  | 0.822590    | 0.0168916   |
| 0.3944362    | 0.3378321  | 0          | 1.3935571  | 0.7784450   | 0.5470038   | 0.1376353   |
| 0.1182412    | 0.7387867  | 0.2565391  | 0.0391174  | 0.1059595   | 0.121121    |             |

|              |            |            |            |            |            |
|--------------|------------|------------|------------|------------|------------|
| 0.162497     | 0.1109117  | 0.07890299 | 0.1426155  | 0.7107396  | 0.04243568 |
| 11.227530    | 0.3491687  | 0.06909182 | 0.0569463  | 1.6258170  | 0.4303633  |
| 0.19522      | 0.5183764  | 0.3567877  | 0          | 0.5581035  | 0.2351995  |
| 0.1308011    |            |            |            |            |            |
| 1.2043090    | 0          | 0.1638619  | 0.1182412  | 0.1587938  | 0.2397292  |
| 0            |            |            |            |            |            |
| 0.8514916    | 0.4740423  | 0.01626834 | 0.3834126  | 0.2429312  | 0.1745844  |
| 1.4769331    | 0.0698020  | 0.1387364  | 0.2140406  | 0.05360362 | 0.2503262  |
| 0.181346     |            |            |            |            |            |
| 0.04148815   | 0.1359095  | 0.2092204  | 0.6296157  | 0.1403078  | 0.07117119 |
| 0.1531682    | 0.4666021  | 0.04738264 | 0          | 0          | 0          |
| 0.03191788   | 0.05736068 |            |            |            |            |
| 0.06363825   | 0.44057    | 0.5675579  | 0.07348325 | 0.6123046  | 1.4342340  |
| 0.3535673    |            |            |            |            |            |
| 0.03764554   | 0          | 0.7090445  | 1.5802332  | 0.0910830  | 0.1905719  |
| 0.1201181    |            |            |            |            |            |
| 0.4225645    | 0.04148815 | 0.8588442  | 0.1086897  | 0.05396902 | 0.0462866  |
| 2.5920960    | 0.0607782  | 0.2454063  | 0.01948545 | 0.1235775  | 0.05396902 |
| 0.2458702    | 1.6309910  | 0.4550391  | 0.1000503  | 0          | 0.1416320  |
| 0.9279516    |            |            |            |            |            |
| 0.07402695   | 0.5367472  | 0.05912061 | 1.4576540  | 0.1548397  | 0.6942990  |
| 0.1506548    |            |            |            |            |            |
| 0.07225853   | 1.57655    | 0.1421479  | 0.2673241  | 0          | 0.2723882  |
| 0.2525541    |            |            |            |            |            |
| 1.2958541    | 0.43799    | 0.1030221  | 0.2004089  | 0.1822282  | 0          |
| 0.1109299    |            |            |            |            |            |
| 0.5031541    | 0.05234018 | 0.3319052  | 0.2105546  | 0          | 0.2501257  |
| 0.2614379    |            |            |            |            |            |
| 0.1411197    | 0.04844147 | 0.7765095  | 0.5371027  | 0          | 0.1662177  |
| 0.5082482    |            |            |            |            |            |
| 0.5912061    | 0.2090910  | 0.8335951  | 0.2956031  | 1.8057850  | 0.1798138  |
| 0.03191788   | 1.0812590  | 0.07673472 | 0.0934042  | 0.1108118  | 0.01694662 |
| 0.5843007    | 0.0557025  | 0.2513979  | 0.1153573  | 0.5548468  | 0.1772611  |
| 0.2360533    | 0.3489156  | 1.2245920  | 0.9147453  | 0.0934042  | 0.1588584  |
| 0.3539193    | 0.2777196  | 0.9470778  | 0.5897492  | 0.02433402 | 0.4480884  |
| 0.5906349    | 2.02594    | 0.2124755  | 0.09528597 | 0.8539644  | 0.3965407  |
| 0.07448859   | 0.47197    | 0.2607826  | 0.07739825 | 0          | 0.5639025  |
| 0.08585171   |            |            |            |            |            |
| 0.1563912    | 0.07496562 | 0.8212298  | 0.2343520  | 0.5089514  | 0.5212090  |
| 0.1027508    |            |            |            |            |            |
| 0.8613599    | 0.05783895 | 0.08154567 | 1.6538110  | 0.09853435 | 0.1361941  |
| 0.06845545   | 0.2607058  | 0.5455471  | 0.1499312  | 0.05767865 | 0.05952647 |
| 0.2468033    | 0.4158764  | 0.5636543  | 0.07107396 | 0.1134703  | 0          |
| 0.1983207    |            |            |            |            |            |
| 0.1008258    | 0.04797984 | 0.05918787 | 0          | 0          | 0.2171566  |
| 1.4392480    |            |            |            |            |            |
| 0.1062377    | 0.4855773  | 0.1307189  | 0.1201527  | 0.3011950  | 0.5899087  |
| 0            |            |            |            |            |            |
| 0.06352398   | 0.5494286  | 0.7005315  | 0          | 0.5167293  | 0.07369141 |
| 0.6604881    |            |            |            |            |            |
| 9.7297250    | 0.1744229  | 0.6437430  | 0.2431128  | 0.07896422 | 0.03487007 |
| 1.3085040    | 0.06388278 |            |            |            |            |
| TCGA-E7-A85H | 394        | 0          | 0.2169491  | 0.1637656  | 0.09256319 |
| 0.3069137    |            |            |            |            |            |
| 0.2741834    | 89.3833    | 0          | 0.2597083  | 0.1397383  | 0          |
| 0.0504421    |            |            |            |            |            |
| 0.4983612    |            |            |            |            |            |
| 0.5131221    | 1.8687480  | 0.1172385  | 0.09501642 | 0.06042105 | 0.5626972  |
| 0.138987     |            |            |            |            |            |
| 0.3801702    | 0.2094456  | 0.1049049  | 4.7295     | 91.337730  | 0.08813038 |
| 0.02743913   |            |            |            |            |            |
| 0.1175072    | 0.09162584 | 0.1615724  | 1.4033710  | 0.04228062 | 0.3510708  |
| 0.02741834   | 0.02704948 | 0.3875187  | 0.08163656 | 0.3685561  | 0.2138866  |
| 0.08478133   | 0.01780528 | 0.07366709 | 0.08928999 | 0.2636955  | 0.02952056 |
| 18.022770    | 0.08096691 | 0.02403201 | 0.01584598 | 0.3598657  | 0.2328543  |
| 9.5350880    | 0.1358057  | 0.2950452  | 0.1692279  | 0          | 0.9942914  |
| 5.137592     |            |            |            |            |            |
| 0.04208396   | 3.3092410  | 0          | 0.2849780  | 0.02741834 | 0.01656984 |
| 0.1191205    |            |            |            |            |            |

|              |            |            |            |            |             |
|--------------|------------|------------|------------|------------|-------------|
| 0.1147744    | 0.08885157 | 0.1648848  | 0.01131714 | 0.1367808  | 0.08111813  |
| 0.4951438    | 0.4640027  | 2.3501430  | 0.07238442 | 0.04963276 | 0.005327084 |
| 0.1160937    | 0.01401712 | 0          | 0.9076416  | 0.04851502 | 0.04610472  |
| 1.2872740    | 0.07547443 | 0.08114845 | 0.2307336  | 0.5104029  | 0.06327309  |
| 0.02960508   | 0.1197096  | 0.02343718 | 0.4507124  | 0.1316080  | 0.1346559   |
| 0.4890839    | 0.03899376 | 0          | 0          | 0.09248435 | 0.5496481   |
| 0.08356065   | 0.4820924  | 0.08658423 | 1.0340630  | 0.1764244  | 0.03754378  |
| 0.06439895   | 2.0137290  | 0.1268418  | 0.5975129  | 0.02259189 | 0.1289509   |
| 0.9010508    | 0.06841627 | 0.3225276  | 0.4748249  | 0.1392008  | 0.03021052  |
| 0.1609272    | 2.3069890  | 0.0308983  | 0.2533721  | 0          | 0.4729436   |
| 0.2897953    | 0.2934503  | 0.05026696 | 1.7348330  | 0.3461003  | 0.1487722   |
| 0.03158133   | 0.08784516 | 2.2369721  | 0.3600180  | 0.02788306 | 0.1267678   |
| 0.1167491    | 0.3086755  | 0.8050491  | 0.1456427  | 0.02886141 | 0.1242803   |
| 0.2350143    | 0.8352048  | 0.0454676  | 0.2290646  | 0          | 0.9183097   |
| 1.0053390    | 0.02890751 | 0.06428456 | 1.3513320  | 0.5930092  | 0.3126879   |
| 0.5092712    | 0.1800607  | 0.04169609 | 0.02220381 | 0.7959137  | 0.1067617   |
| 0.2274196    | 0.09635838 | 0.1886239  | 0.3089182  | 0          | 0.2669313   |
| 0.4181467    | 0.1233125  | 0.4926344  | 0.4887293  | 3.0477650  | 0.1988583   |
| 0.05525528   | 0.1846541  | 0.4507926  | 0.1756903  | 0.4905302  | 0           |
| 0.3890225    | 0.2677772  | 0.1900408  | 0.3314305  | 0.2894158  | 0.3034408   |
| 0.1669701    | 0.3663950  | 0.09070729 | 0.1447015  | 0.03185934 | 1.3815120   |
| 0            | 0          | 0.2257148  | 0.2608447  | 0.3540542  | 0.9229343   |
| 0.8715763    | 0.1106488  | 0.1323644  | 0.8948184  | 0.1370917  | 0.2842320   |
| 0.06934395   | 0.4156562  | 0.07822523 | 0.0401244  | 0.04140985 | 0           |
| 0.4354572    | 0.04944291 | 0.09867014 | 0          | 0.2759253  | 0.07013994  |
| 0.2264586    | 0          | 0          | 0.2623776  | 0.6674792  | 0.1164485   |
| 0.5308190    | 0.2829095  | 0.01519723 | 0.1652612  | 0.3309456  | 0.02276239  |
| 0.02209536   | 0.6181459  | 0.1299541  | 0.1569026  | 0.6188258  | 0.02563188  |
| 1.5904784    | 0.3434960  | 0.2133876  | 0.2035557  | 0.1073953  | 0.05637416  |
| 0.02425751   | 1.1044570  | 0.2844181  |            |            |             |
| TCGA-G2-AA3C | 211        | 1          | 0          | 0.01967913 | 0.06673791  |
| 20.836060    | 0.08024969 | 0.63809    | 0.1266724  | 0.1272904  | 4.7407920   |
| 1.2961990    | 0.02983368 | 1.3212     | 0.04356348 | 1.3379590  | 0.2405025   |
| 0.06040399   | 0.0756363  | 1.37646    | 27.747440  | 0.04236124 | 0.3363206   |
| 0.1321242    | 0          | 1.2514726  | 0.0968510  | 0          | 0.1950263   |
| 0.2657283    | 0.05607706 | 0.09508676 | 0.1283758  | 0.02499475 | 0           |
| 0.08513711   | 0          | 0.05837701 | 0.06930816 | 0.3084729  | 0.8154538   |
| 2.2629820    | 0.2363634  | 0.1138788  | 0          | 1.1333573  | 0.20873     |
| 0.8456558    | 0          | 0          | 0.08218747 | 0          | 0.0053097   |
| 0.1708316    | 0.2377633  | 0.06527711 | 0.04930938 | 0.07798139 | 0.06735809  |
| 1.2990780    | 0.02862811 | 0          | 0.02092584 | 0.04042529 | 0           |
| 0.6648286    | 0.02814943 | 0          | 0.1088339  | 0.1170158  | 0.04753101  |
| 0            | 0          | 0.06403564 | 0.02877015 | 0.01126544 | 0.5134414   |
| 0.1030308    | 1.8336690  | 0.06487947 | 0          | 0          | 0.08890809  |
|              |            |            |            | 3.2923     | 0.7551470   |

|              |             |             |            |             |            |            |            |
|--------------|-------------|-------------|------------|-------------|------------|------------|------------|
| 0.2711119    | 0.8477753   | 0           | 0.5136065  | 0           | 0.05413801 | 0          | 1.6498810  |
| 1.16933      | 0.006515486 | 0           | 0.2706901  | 0.09865604  | 0.07059308 | 0          | 0          |
| 0.02841509   | 0.5493584   | 0.01485175  | 0.7114940  | 0.8958253   | 0.07766227 |            |            |
| 0.09286307   | 0.05037553  | 0           | 0.5175773  | 0.1425930   | 0.03412961 | 0.09664638 | 0          |
| 0            | 0.3370141   | 1.1507520   | 0.1033446  | 0           | 0.04569969 | 0          | 0.1669159  |
| 0.2523648    | 0           | 0.08323612  | 0.04480296 | 0.2033339   | 0.1003636  | 0          |            |
| 0.1415616    | 0           | 0.3894705   | 0.4246353  | 0           | 0.04168454 | 0.6952360  | 0.6777798  |
| 0.01075619   | 0.07378282  | 0.04942145  | 0.1468735  | 0           | 0.07515704 | 0.09605346 |            |
| 0.6306071    | 0.07697499  | 0           | 0.2871602  | 0.1529972   | 0.6330208  | 0          |            |
| 0.2389122    | 0.05785925  | 0.2226337   | 0.1778162  | 0.09471696  | 0.1655444  |            |            |
| 1.3810260    | 0.9749602   | 0           | 0          | 3.8165460   | 0.09286307 | 1.0767160  | 0.5080008  |
| 0.2744986    | 0.1071514   | 0.8129135   | 0          | 0.1433765   | 0.4393017  | 0.1193347  |            |
| 0.01660485   | 0.1646775   | 0           | 0.07278807 | 0           | 0.9099881  | 0.1722411  |            |
| 0.05229363   | 0.07520035  | 0.08529823  | 0.04701716 | 0.5105450   | 0.2376550  | 0.13743    |            |
| 2.3565190    | 0.01450502  | 0.1090680   | 0          | 0.04554018  | 0          | 0.09230192 | 0.05211955 |
| 0            | 0.1735778   | 0.2388515   | 0.1485457  | 0.05214733  | 0.6733887  | 0.2138895  |            |
| 0.05691281   | 0           | 0.03315695  | 0.3034247  | 0.01604336  | 0.1187464  | 0          | 0          |
| 0.2138895    | 0           | 0           | 0.4870978  | 0.08741884  | 0.02739295 | 0.05532107 |            |
| 0.1718001    | 0           | 0.03186144  | 0.1633034  | 0.1873933   | 0          | 0.4789792  |            |
| 0.3326497    | 0.4586928   | 5.6260970   | 0.02413366 | 0.7338167   | 0.1548636  | 0          |            |
| 0.3281618    | 0           | 0.7175556   | 0.06438323 | 0.01281656  |            |            |            |
| TCGA-E7-A8O8 | 13          | 0           | 0.2152335  | 0.09864291  | 0.1115094  | 0.1279848  | 0          |
| 118.52520    | 0.0893904   | 0.9539290   | 0.0151917  | 0.0275679   | 0.4945199  |            |            |
| 1.5103330    | 0.09138755  | 0.06813378  | 0          | 0           | 0.2344095  | 0.05495819 | 0.1513895  |
| 0.06318865   | 3.842373263 | 15          | 0.1557149  | 0           | 0.07077949 | 0.1103802  | 0          |
| 3.0253180    | 0.03844812  | 0           | 0.2606886  | 0.07985379  | 0.04917312 | 0.8879871  |            |
| 0.06246442   | 0.1021347   | 0           | 0.03132196 | 0.0358554   | 0.1588349  | 0          | 28.3379    |
| 0.1950790    | 0.02895097  | 0.009544695 | 0.8670488  | 0.1202218   | 0.2076270  | 0.08180144 |            |
| 0.1974645    | 0.02718215  | 0           | 1.6084830  | 0.006851063 | 2.1699160  | 0          |            |
| 1.7165420    | 0.00443587  | 0.1025018   | 0.09217794 | 0.5351903   | 0.2482925  |            |            |
| 0.01363357   | 0.1071055   | 0.0325739   | 0.1800730  | 0.1996345   | 6.1814090  | 0.02906678 |            |
| 0            | 0           | 0.1223742   | 0.0168862  | 0.03476887  | 0.09111843 | 0.05844526 |            |
| 0.1388540    | 0.05964455  | 0.08022602  | 0.09775822 | 0           | 0.05589765 | 0          | 0          |
| 0.01783238   | 0.02403537  | 0.006274308 | 0.1683194  | 0           | 0          | 0.1820812  |            |
| 1.2490860    | 0.003613473 | 0           | 0          | 0           | 1.5789781  | 0.3668860  | 0.03992689 |
| 0.02516604   |             |             |            |             |            |            |            |
| 0.6799246    | 0.1390755   | 0.2491438   | 0.03036223 | 0.04522839  | 0.03879018 |            |            |
| 2.2935850    | 0.3084917   | 0           | 0          | 0.7236542   | 0.3708899  | 0.05203712 |            |
| 0.06355709   | 0           | 0           | 0.1424325  | 0.9051497   | 0.01240756 | 0.2570386  | 0          |
| 0.4731801    | 0           | 0.07758037  | 0.1094213  | 0.06055579  | 0.8167524  | 0.1786892  |            |
| 0.1425641    | 0           | 0.1902276   | 0.1058256  | 0.3217724   | 1.2998810  | 0          | 0          |
| 0.3718564    | 3.2468210   | 0.04386335  | 0          | 0.09624761  | 0          | 0.04192324 | 0          |
| 0.1182645    | 0           | 0.3253744   | 0.3967119  | 0.3943168   | 0          | 0.1936064  |            |
| 0.9201334    | 0.2336365   | 0.1095826   | 0.04128804 | 0.3272058   | 0          | 0.01255765 |            |
| 0.02674857   | 1.4540410   | 0.3858422   | 0.03913839 | 0           | 0.02840402 | 0.1762810  |            |



|                    |                   |                   |                           |                    |                   |
|--------------------|-------------------|-------------------|---------------------------|--------------------|-------------------|
| 0.08870838         | 0.09667443        | 0.2247431         | 0.1114144                 | 0.2769521          | 0.1580575         |
| 1.5871990          | 0.5479375         | 0.03328257        | 0.07414994                | 0.3103215          | 0.3174769         |
| 0.1826523          | 0                 | 0.3841172         | 0.4001948                 | 0.03395652         | 0.03815651        |
| 0.05505072         | 0.1661592         | 0.1734019         | 0.2694199                 | 0                  | 0.06283613        |
| 0.6164020          | 0                 | 0.06282445        | 0.09001325                | 0.03927943         | 1.5639190.3970871 |
| 0.1435160.4199896  | 0.02423578        | 0.09111843        | 0.5133206                 | 0.08257607         |                   |
| 0.1521821          | 0                 | 0.01606491        | 0.1669114                 | 0.03141222         | 0                 |
| 0.1394090.6408997  | 0                 | 0                 | 0.02770023                | 0.2534893          | 0.04691072        |
| 0                  | 0.2298779         | 0.6700845         | 0.02805674                | 0                  | 0.2325342         |
| 0.01830786         | 0.08532322        | 0.4624743         | 0.2193719                 | 0                  | 0.3694929         |
| 0.09450903         | 0.3288924         | 0.06175661        | 0.4257829                 | 2.9863130.09576915 |                   |
| 0.1716542          | 0                 | 0                 | 0.01890727                | 0                  | 0.6871924         |
| TCGA-XF-A9SM       | 1048              | 0                 | 0.01661198                | 0.05329364         | 0                 |
| 33.081020.1736299  | 0.2294003         | 0.3637959         | 0                         | 0.04924555         | 0.3938652         |
| 0.2226445          | 0.8005889         | 0.01795411        | 0.1884699                 | 0.1573008          | 0.07792189        |
| 0.1447360          | 0.08179093        | 0.1365553         | 2.90177323.224930.1147197 | 0.9643764          |                   |
| 1.6825560.1192698  | 0                 | 0.5288034         | 0.2751844                 | 0.0830892          | 0                 |
| 0.1128341          | 0.1239778         | 0.1439254         | 0.08436887                | 0.06744239         | 0.3322069         |
| 0.1090546          | 0.06457179        | 0.04290672        | 0.4995518                 | 0.07159814         | 0.105395          |
| 0.03128259         | 0.08250714        | 0.4684390.6062151 | 3.0078710.1325842         | 0.4267353          |                   |
| 0.2202848          | 0                 | 0.3574662         | 0.04259636                | 0.05033921         | 2.7808920         |
| 0.2596701          | 0.03569059        | 0.05032776        | 0.3544222                 | 0.09960164         | 0.1927642         |
| 0.4292626          | 0.03682894        | 0.05341448        | 0.02639797                | 0.1945754          | 0.1294274         |
| 0.6118386          | 0.2826695         | 0.1550573         | 0.006934291               | 0.09444983         | 0.05473847        |
| 0.07513808         | 0.4922840.1894567 | 0.1800442         | 0.4573939                 | 0.1288962          |                   |
| 0.06934972         | 0                 | 0.08581343        | 0.1207989                 | 0                  | 0.04990633        |
| 0.1558266          | 0.01016943        | 0.3344159         | 0.08565741                | 0                  | 0.3469873         |
| 0.2225559          | 0                 | 0.05120823        | 0.1203873                 | 0.4402951          | 0.6816787         |
| 0.1291659          | 0.5816244         | 0.03756904        | 0.7478028                 | 0.1640375          | 0.09774186        |
| 3.3242610.05503689 | 0.1111122         | 0.02352638        | 0                         | 0.3909674          | 0.1781156         |
| 0.9633732          | 0.2747031         | 0.09059918        | 0.03932519                | 0.04275098         | 1.859667          |
| 0.02681365         | 1.8921010.1070718 | 1.5599510.1752663 | 0.1257426                 | 0.09094899         |                   |
| 0                  | 1.37571           | 0.2574403         | 0.1232366                 | 0                  | 0.2466575         |
| 1.0680570.09329025 | 0.03629551        | 0.2475214         | 0.05065761                | 0.05022556         |                   |
| 0.3644996          | 0                 | 0                 | 0.6355498                 | 0                  | 0.1811984         |
| 0.04386553         | 1.5469470.4492705 | 0.03043383        | 0.2634034                 | 0.5020772          |                   |
| 0.9942378          | 0.1407910.1554105 | 0.3122926         | 0.4861420.3515789         | 0.04070701         |                   |
| 0.2023196          | 0.2732426         | 0.1737152         | 0.2960332                 | 0.1421542          | 0.07672895        |
| 1.2275250.05044066 | 0.1677421         | 0.5223013         | 0.3182083                 | 0.2006456          |                   |
| 0.1282529          | 0.08112379        | 0.8058559         | 0.9318773                 | 0.08458092         | 0.1078891         |
| 2.0030430.08382843 | 0.3430455         | 1.43378           | 0                         | 0.3623967          | 0.3698372         |
| 0.2568388          | 0.0824590.1725699 | 0.9914052         | 0.2154493                 | 0.05995746         |                   |
| 0.08671602         | 0.05903706        | 0.1292228         | 0                         | 0.3774254          | 0                 |
| 0.06788411         | 0.5471022         | 0.1697714         | 0.5632906                 | 0.9439478          | 0.2326115         |

|                           |                    |                           |                            |            |                   |                    |
|---------------------------|--------------------|---------------------------|----------------------------|------------|-------------------|--------------------|
| 1.6876210.03928147        | 0.0492284          | 0.1317321                 | 0                          | 0.04110958 | 0                 | 0.1388698          |
| 0.5410617                 | 0.1018262          | 0.05223013                | 0.0539034                  | 0.04469789 | 0.2447844         |                    |
| 0.6283937                 | 0.06436008         | 0.1027515                 | 0.08519272                 | 0.05986223 | 0                 | 0.028965           |
| 0.1339920                 | 0                  | 0.02069929                | 1.2550210                  | 0.06871583 | 0.6281543         | 0.1183708          |
| 0.1285850.3226820.4135617 | 0.05925984         | 0.02876165                | 0.2026965                  | 0.2960332  |                   |                    |
| 0                         | 1.1312940.06673028 | 2.3463774.3211330.0653571 | 0.4769451                  | 0.06989848 |                   |                    |
| 0.1467650.07150499        | 0                  | 0.1737852                 | 0                          | 0.1041268  |                   |                    |
| TCGA-DK-A3IN              | 250 1              | 0.1263864                 | 0.1081242                  | 0.04583527 | 0.1519770.0969783 |                    |
| 19.479640                 | 0.06430094         | 0.1845209                 | 0.08699801                 | 0          | 0.7277420.2371477 |                    |
| 0.4685383                 | 0.1024481          | 0.1277073                 | 0.02991918                 | 0.2074944  | 0.7708211         |                    |
| 0.06777072                | 0.08297032         | 0.1558399                 | 11.6411818.331250.06400568 | 0.2989196  |                   |                    |
| 0.2909349                 | 0.09074223         | 0.5600497                 | 0.1828734                  | 0.3768559  | 0.2528619         |                    |
| 0.1900775                 | 0.5893498          | 0.1009952                 | 0.02694976                 | 0.1460007  | 0.1925672         |                    |
| 0.09795768                | 0.09404573         | 0.1630796                 | 0.1375561                  | 0          | 0                 | 1.9065520.04009304 |
| 0.04760051                | 0.01569316         | 0.2545680.2306087         | 1.7792970.16812            | 0.9739995  |                   |                    |
| 0.3240188                 | 0                  | 0.2719655                 | 0.03240794                 | 0.06195396 | 0.7467329         | 0.04480398         |
| 0                         | 0.1128919          | 0.02715392                | 0.06564017                 | 0.04718869 | 0.2273352         | 0.3226473          |
| 0.9389444                 | 0.0392280.06095779 | 0.04016793                | 0.09252241                 | 0.5579982  | 2.05594           |                    |
| 0.09558181                | 0.01966165         | 0.03165427                | 0.1293459                  | 0.05552778 | 0.08574924        |                    |
| 0.2809027                 | 0.04804716         | 0.7533917                 | 0.1353302                  | 0.3922646  | 0.04396857        |                    |
| 0.08036588                | 0.09793219         | 0.3216696                 | 0.0626629                  | 0          | 0.1099484         | 0.0197592          |
| 0.0154741                 | 0.4820752          | 0.03258471                | 0                          | 0.4027935  | 0.6974889         | 0.3000299          |
| 0.02593573                | 0.07791996         | 0.1831849                 | 1.4655510.2593156          | 0.09847028 |                   |                    |
| 0.04137741                | 0.2561891          | 0.02858308                | 0.3299848                  | 0.0748813  | 0                 | 0.03188895         |
| 1.0696750.04187287        | 0.3381432          | 0.03132363                | 0                          | 0.1487269  | 0.1016347         |                    |
| 1.0181430.3657467         | 0.06892919         | 0.02991918                | 0.1853958                  | 1.1109290  |                   |                    |
| 1.0829550.04073089        | 0.6390645          | 0.0800071                 | 0.4145564                  | 0.2906204  |                   |                    |
| 0.04978219                | 0.6813167          | 0.1958644                 | 0.04353152                 | 0.2323169  | 0.1876606         | 0                  |
| 0.2645253                 | 0.4007312          | 0.3193947                 | 0                          | 0.03138632 | 0.03854105        | 0.1910617          |
| 0.2079875                 | 0.03605954         | 0                         | 0.6417837                  | 0          | 0.1378584         | 0                  |
| 0.6419674                 | 0.7149821          | 0                         | 0.05725748                 | 0.1591615  | 0.05818698        | 0.2327             |
| 0.3828678                 | 0.1697120.5379839  | 0.04458107                | 0.1548524                  | 0.02198968 |                   |                    |
| 0.3118305                 | 0.02643302         | 0.03217521                | 0.1717724                  | 0          | 1.1110420.038376  |                    |
| 0.0729261                 | 0.3576371          | 0.3695173                 | 0.2747774                  | 0.1626279  | 0.2663713         |                    |
| 0.3458552                 | 0.3938811          | 0.06435041                | 0.2736121                  | 0.6705357  | 0.1275558         |                    |
| 0.5219881                 | 0.7551976          | 0.05029445                | 0.2662906                  | 0.1991288  | 0.4885169         |                    |
| 0.1463841                 | 0.2297640.2111972  | 0.3278340.05131858        | 0.09896224                 | 0.04491627 |                   |                    |
| 0.07665208                | 0.0315521          | 0.08445613                | 0.1182943                  | 0.1077450  | 0.4763674         |                    |
| 0.4843673                 | 0.1947999          | 0.5223050.1061845         | 1.4673910.09961973         | 0.05618053 |                   |                    |
| 0.4641942                 | 0.2375968          | 0                         | 0                          | 0.2139497  | 0.1551136         | 0.05164723         |
| 0.0410105                 | 0.1700341          | 0.3867969                 | 0.6771333                  | 0.09793219 | 0.1563498         | 0                  |
| 0.0683161                 | 0.2083906          | 0.1046757                 | 0.1019431                  | 0          | 0                 | 0.2283507          |
| 0.5875931                 | 0.02306511         | 0.02091201                | 0.9080272                  | 0.2601683  | 0.1091174         |                    |
| 0.3740971                 | 0.2622032          | 0                         | 0                          | 0.1588876  | 1.2226580.0517965 | 0.67144            |

|              |            |            |             |             |             |             |
|--------------|------------|------------|-------------|-------------|-------------|-------------|
| 0.4569244    | 1.2251092  | 0.0494020  | 0.04972464  | 0.3427076   | 0.05317979  | 0.223322    |
| 0.09326066   | 0          | 0.1562580  | 0.004421809 | 0.14964     |             |             |
| TCGA-XF-A8HC | 200        | 1          | 0.1338044   | 0.1430880   | 0.3005768   | 0.02933436  |
| 21.957070    | 0.1250357  | 0.4186093  | 0.1315774   | 0.05666541  | 0.0571272   |             |
| 0.5636191    | 1.5589780  | 0.2272519  | 0.01355417  | 0.04525034  | 0.01793249  |             |
| 0.04163587   | 0.04555454 | 0.1254859  | 0.1571302   | 4.30223624  | 9.77460184  | 8065        |
| 0            | 0          | 0.5489611  | 0           | 3.1806830   | 0.3824332   | 0           |
| 0.3056950    | 7.176464   | 0.1359131  | 1.3898170   | 0.1066774   | 0.05408875  | 0.04458051  |
| 1.5305160    | 0.04421689 | 16.367330  | 2.425499    | 0.1079879   | 0.01186732  | 1.386049    |
| 0.7972045    | 4.2392020  | 0.4068286  | 0.3928254   | 0.05069505  | 0           | 1.7304050   |
| 0.01703643   | 9.0349840  | 0.06776238 | 0.4506762   | 0.8110143   | 0           | 0.008272953 |
| 1.4732620    | 4.0111304  | 0.8428709  | 0           | 0           | 0.1536562   | 0.1316266   |
| 0.5957133    | 1.6427240  | 0.1806997  | 0.04460497  | 0.007979085 | 0.3043058   | 0           |
| 0.08645918   | 0.3398740  | 0.3633372  | 0.1726430   | 0.1483171   | 0.05319912  |             |
| 0.4861875    | 0.1481145  | 0.1389998  | 0           | 0           | 0.07760109  | 0           |
| 0.4050553    | 0.04928173 | 0          | 1.39538     | 1.2893170   | 0.004492782 | 0           |
| 0.09235078   | 7.9161661  | 9.173920   | 0.2894324   | 3.0468860   | 0.08645918  | 0.6023323   |
| 0.07550126   | 0          | 0.09645891 | 5.9913330   | 0.2533173   | 1.4703160   | 0.006767779 |
| 0.1287646    | 1.0684530  | 0.8198095  | 0.05175994  | 1.5014410   | 0           | 0.1574153   |
| 1.7118920    | 0.1234147  | 0.3395609  | 0.2464087   | 0.7444107   | 0.04033475  |             |
| 0.04822945   | 0.1779090  | 0.07529154 | 2.2102110   | 0.2221717   | 0.4102207   | 0.05019436  |
| 0.09460717   | 0.1315774  | 0.3500641  | 4.478420    | 0           | 0.04746927  | 0           |
| 2.6737960    | 0.1090743  | 0.04322959 | 1.0969630   | 0.3520124   | 0.1563747   | 0.0681029   |
| 0            | 0.1009495  | 0.2427309  | 1.3232341   | 5.758690    | 0.2164932   | 0.4332941   |
| 1.3200460    | 0.2178675  | 0.06812429 | 0.5646865   | 0.5085357   | 0.06742526  |             |
| 0.2342018    | 0.2328033  | 1.3886540  | 0.09732479  | 0.02886576  | 0.1765795   | 0           |
| 0            | 0.1516554  | 0.4206977  | 0.6552210   | 0.3232277   | 0.3935383   | 0.2505624   |
| 1.57716      | 0          | 0          | 0.09219372  | 0.6269829   | 0.1315774   | 0.4274808   |
| 0.05071086   | 0.4348198  | 1.4141710  | 0.1055489   | 0.1423247   | 0.09928554  |             |
| 0.8898091    | 0.1652741  | 0.3277086  | 0.5773077   | 0.4755255   | 0.1789355   | 0           |
| 4.2407370    | 0.08945529 | 0          | 0.3905613   | 0.05829022  | 0.1953511   | 4.141711    |
| 0.4282547    | 0.5385090  | 0.1958668  | 0.05664567  | 0.3350723   | 0           | 0.1419107   |
| 0.03595351   | 0.1714361  | 0.1171684  | 0.1802990   | 0.05143255  | 0.4983325   |             |
| 1.1333080    | 0          | 0          | 0.1377634   | 0.1050580   | 0.1333167   | 0.06167225  |
| 0.01402222   | 0          | 2.83269    | 0           | 0.09488315  | 0           | 0.3026795   |
| 0.2165921    | 0.9914028  | 0.1704714  | 0           | 0.4452704   | 0           | 0.07833801  |
| 0.6610964    | 0.03839228 | 5.1351185  | 9.408120    | 0.2130794   | 0.09146778  | 0           |
| 0.5066346    | 0.0587705  | 0          | 0.5817294   | 0.3343814   | 0.03993854  |             |
| TCGA-ZF-AA4W | 1830       | 0          | 0           | 0.01924988  | 0           | 0.08325291  |
| 79.238950    | 0.06271583 | 0.2878306  | 0.1642557   | 0           | 0.01778769  | 0.1362882   |
| 0.04825206   | 0.8341615  | 0.03891058 | 0.04467493  | 0.04261326  | 0.2955299   |             |
| 0.07841887   | 0.0643496  | 0          | 0.2219595   | 0.5938964   | 76.0277     | 0.04143724  |
| 0.5031531    | 1.3259920  | 0.1292422  | 0           | 0.8595268   | 0.1192773   | 0           |
| 0.3815447    | 0.05034584 | 0.03838397 | 0.9357559   | 0.04571157  | 0.01328753  |             |

|              |            |            |                |            |            |            |            |
|--------------|------------|------------|----------------|------------|------------|------------|------------|
| 0.4102138    | 0.07131122 | 0.02798831 | 0.04649425     | 0.1249201  | 3.827508   |            |            |
| 0.05710367   | 0.06779639 | 0          | 0.4350911      | 0.1876863  | 9.0758470  | 0.5548987  |            |
| 0.01591355   | 0          | 0.45414    | 0.6923691      | 0.01604358 | 0.8272102  | 0.1276267  |            |
| 0.1212605    | 0.3617765  | 0.03867476 | 0.02337248     | 0.1344197  | 0          | 0.08355267 |            |
| 0.05814429   | 0.03192663 | 0.1543483  | 0.09535055     | 0.03953331 | 0.2337486  | 0          |            |
| 0.06806758   | 0.1820238  | 0.05259859 | 0.0614082      | 0.03954352 | 0.08142055 |            |            |
| 0.2400502    | 0.06843255 | 0          | 0              | 0.03491839 | 0.09393526 | 1.1446340  |            |
| 0.0654496    | 0          | 0          | 0.01043981     | 0.0281426  | 0.0183662  | 0.1652949  | 0          |
| 0.3837523    | 0.2483547  | 0.02115477 | 0.03693971     | 0          | 0.0434844  | 0.1789159  |            |
| 0.4514128    | 0.04674971 | 0.05156635 | 0.4643987      | 0.04071027 | 0.1458591  | 0          |            |
| 0            | 0.09083752 | 0.7746690  | 0.1192773      | 0.1204026  | 0.01274674 | 0.1212605  |            |
| 0.1059143    | 0.1930083  | 0.06499132 | 0.2232537      | 0          | 0          | 0.06485568 |            |
| 0.9553344    | 0.0290556  | 0.7147848  | 0              | 0.8593249  | 0.2658890  | 0.04541876 |            |
| 0.1478302    | 0          | 0.4640971  | 0.06974137     | 0.0524624  | 0          | 0          | 0.2354736  |
| 0.7927125    | 0.1516357  | 0.03933027 | 0.1341086      | 0          | 0.05442504 | 0.5924644  |            |
| 0            | 0          | 0.3756489  | 0.4640971      | 0.2454360  | 0.1282681  | 0.2769477  | 0.04753323 |
| 0.3047802    | 0.2367180  | 0.1223259  | 0.2266904      | 0.5801214  | 0.4050807  |            |            |
| 0.06415417   | 0.04834345 | 0.04788995 | 0.06349588     | 0.02940708 | 0.1252778  |            |            |
| 0.6168522    | 0.1505920  | 0.1833059  | 0.2627742      | 0.04988666 | 0          | 0          | 0.01298339 |
| 0.1131944    | 0.3992588  | 0.0869688  | 0              | 0.03701337 | 0.2239065  | 0.1121993  |            |
| 0            | 0.4286699  | 0.08682089 | 0.09083752     | 0.3097736  | 0.3459571  | 0          | 0.12083    |
| 0.1603041    | 0.09939775 | 0.02978453 | 0.1402491      | 3.4162710  | 0.03891058 |            |            |
| 0.03248532   | 0.1006784  | 0          | 0.09493386     | 0          | 0.09623126 | 0          | 0          |
| 0.1866369    | 0.1379748  | 0.3329392  | 0.0929885      | 0.08402022 | 0.6454331  |            |            |
| 0.1135090    | 0.0533445  | 0.04507787 | 0.04834345     | 0          | 0          | 0.8389317  | 0.1869366  |
| 0            | 0          | 0.05841039 | 0.09687037     | 0.02040395 | 0.6225693  | 0          | 0.1391785  |
| 0            | 0          | 0.07062037 | 0              | 0.2009869  | 0.05282016 | 0.5943951  | 0.2092241  |
| 0.0657023    | 0.01489226 | 1.4294190  | 0.09976404     | 0.05894998 | 0.1040661  |            |            |
| 0.09336263   | 0.03210735 | 0          | 0.1464296      | 0.6873970  | 1.7778530  | 0.8973753  |            |
| 3.1165550    | 0.05311632 | 0.3732615  | 0              | 0          | 0.0442764  | 0          | 0.2225550  |
| 0.03761101   |            |            |                |            |            |            |            |
| TCGA-LC-A66R | 466        | 0          | 0.1017773      | 0.1360484  | 0          | 0.2118202  | 0          |
| 0.08864876   | 0.3328758  | 0.4179156  | 0              | 0.1257144  | 0.8668944  | 0.3410212  |            |
| 0.6131249    | 0.1237501  | 0.08570082 | 0.2409352      | 0          | 0.1662675  | 0.06063873 |            |
| 0.2923152    | 0.1045798  | 4.39285328 | 945520.1640002 | 0.5744359  | 0.585715   |            |            |
| 0.09134188   | 0          | 0.2577146  | 2.9504710      | 0.1640002  | 1.0246950  | 0.05083128 |            |
| 0.0542557    | 0.07348278 | 0.2326077  | 0.06573667     | 0.1301674  | 0.08927852 |            |            |
| 0.1780265    | 0.1314391  | 0.05885815 | 1.4256550      | 0.2421479  | 0.1916603  |            |            |
| 0.03159373   | 0.5125006  | 1.0611784  | 1.431630       | 0.2030772  | 0.9150736  | 0.3149131  |            |
| 0            | 0.2265623  | 0          | 0.06576501     | 1.5033350  | 0.09020011 | 0.08570082 | 0.3409138  |
| 0            | 0.05873239 | 0.1492874  | 0.3051166      | 0.4133557  | 0.9040558  | 0          |            |
| 0.06817846   | 0.1078223  | 0.1490141  | 0.5286453      | 0.2342860  | 0.7216009  |            |            |
| 0.01979158   | 0.03186345 | 0.1446674  | 0.2515263      | 0.05754393 | 0.4147131  |            |            |
| 0.3869174    | 0.1838474  | 0          | 0.1974284      | 0.1947402  | 0.4853817  | 0          | 0          |

|                    |                            |                    |                    |                            |                    |                    |
|--------------------|----------------------------|--------------------|--------------------|----------------------------|--------------------|--------------------|
| 0.1261540.1528815  | 0.02951333                 | 0.1591182          | 0.02076848         | 0.4942472                  | 0                  | 0                  |
| 0.8657019          | 0.6630927                  | 0.09568717         | 0                  | 0                          | 0.1843955          | 0.3371967          |
| 0.5220585          | 0.1321613                  | 0.1041271          | 0.7267585          | 0.2301757                  | 0.4810672          | 0                  |
| 0                  | 0                          | 2.4819860.08429917 | 0.08509444         | 0.0180175                  | 0.08570082         | 0.2994194          |
| 0                  | 0.4191348                  | 0.2103793          | 0                  | 0.0602338                  | 0.2946646          | 1.0549720.04107005 |
| 1.80799            | 0.0820001                  | 1.73408            | 0.3758338          | 0.5135949                  | 0.2507493          | 0                  |
| 1.3120020.1971587  | 0.2494323                  | 0.06681489         | 0.3148346          | 0                          | 0.06656835         |                    |
| 1.0532680          | 0                          | 0.1895624          | 0                  | 0.5385081                  | 0.4885112          | 0.07259566         |
| 0.05754393         | 0.6194758                  | 0                  | 0.5550776          | 0.09065338                 | 0.3914652          | 0                  |
| 0.6462097          | 0.6376351                  | 0                  | 0                  | 0.06408533                 | 0.4685720.2082113  | 0.1926989          |
| 0.4100005          | 0.4738467                  | 0.08975135         | 0.1247006          | 0                          | 1.0114270.0532154  |                    |
| 0.06477566         | 0.1793115                  | 0                  | 0.3241693          | 0                          | 0.1835201          | 0.4000005          |
| 0.4873948          | 0.2458606                  | 0.2619241          | 0.03923876         | 1.8145521.2687490.06477566 |                    |                    |
| 0                  | 0.3681637                  | 0.3209968          | 0.1751458          | 0.5601387                  | 0                  | 0.3842845          |
| 0.2353046          | 0.3652964                  | 0.0631506          | 0                  | 0.3948153                  | 0.1100001          | 0.05739746         |
| 0.2561560          | 0.1341889                  | 0                  | 0.5440911          | 0                          | 0                  | 0.4034758          |
| 0.5490441          | 2.6945020.09500999         | 1.3250350.06016683 | 0.1508048          | 0.2230113                  |                    |                    |
| 0                  | 0.06296692                 | 0                  | 0.4892209          | 0.2282027                  | 0                  | 0.1600002          |
| 0.7642855          | 0.7307152                  | 0.1971587          | 0.07869148         | 0.1304884                  | 0                  | 0                  |
| 0.03327394         | 0.08209339                 | 0                  | 0.09332655         | 0.2536383                  | 1.47869            | 0.04643506         |
| 1.7318420.08058078 | 0.0681756                  | 0.2059363          | 0.4750847          | 0                          | 0.04405378         |                    |
| 0.2352024          | 1.1659620                  | 2.29526            | 0.2044195          | 0.7046883                  | 2.3208130.06673765 |                    |
| 0.3652648          | 0                          | 0.1123989          | 0.06258464         | 0                          | 0.2661841          | 0                  |
| TCGA-E7-A8O7       | 466                        | 0                  | 0.4254793          | 0.1516666                  | 0.0428623          | 0.5247486          |
| 25.785050          | 0.1632107                  | 0.1294144          | 0.2440654          | 0.5021908                  | 0.1813201          |                    |
| 1.0454670.7667589  | 0.2107669                  | 0.03352251         | 0.05595712         | 0.09424601                 |                    |                    |
| 0.05148743         | 0.05633331                 | 0.3685463          | 0                  | 2.91382339.509340.04353028 |                    |                    |
| 0.1524715          | 0                          | 0.2121412          | 0                  | 2.0008380                  | 0.0295576          | 0.02539266         |
| 0.8266849          | 0.1416666                  | 0.05040348         | 0.2047962          | 0.2941256                  | 0.09160394         |                    |
| 0.03847626         | 0.04146982                 | 0.09188135         | 0.2136869          | 0                          | 15.366810.1499701  |                    |
| 0.2670782          | 0.007337635                | 0.9046137          | 0.6469528          | 3.6234660.09432922         |                    |                    |
| 2.0948950.1044835  | 0.1260087                  | 0.8594440          | 0.01896071         | 1.0862420.0418979          |                    |                    |
| 0.1592319          | 0.1847466                  | 0                  | 0.01705073         | 0.1512958                  | 0.2834530.438865   |                    |
| 0.1527030.02620256 | 0.1646781                  | 0.1752919          | 0.1903467          | 1.5654167.617799           |                    |                    |
| 0.06703663         | 0.06435223                 | 0                  | 0.2284729          | 0                          | 0.1603747          | 0.2451706          |
| 0.2246536          | 0.2775402                  | 0                  | 0.1604844          | 0.2014717                  | 0.07515318         | 0.1221068          |
| 0.1718888          | 0.1171969                  | 0.1065201          | 0.1439437          | 0.05543272                 | 0.03858779         |                    |
| 1.1938030.06094239 | 0.04734226                 | 0.2774105          | 2.2647510.01111166 | 0                          | 0                  |                    |
| 0.05710105         | 1.4488061.0777590.1534721  | 0.1837945          | 0.5880406          | 0.213833                   |                    |                    |
| 0.8831811          | 0.1867316                  | 0                  | 0.1192823          | 1.2546060.07831382         | 0.5928948          |                    |
| 0.008369118        | 0.1194239                  | 0.2433903          | 0.5068933          | 0.08000871                 | 0.7329078          | 0                  |
| 0.1398928          | 0.3041591.2152840.09538508 | 1.4079180          | 0.8240384          | 0.02493922                 |                    |                    |
| 0.2385645          | 0.4594209                  | 0                  | 0.7940979          | 0.8242209                  | 0.1784888          | 0.09310644         |
| 0.2632329          | 0.04067757                 | 0.7111821.6655060  | 0.02582305         | 0                          | 0.0720824          |                    |

|              |            |            |             |             |             |            |
|--------------|------------|------------|-------------|-------------|-------------|------------|
| 0.2501367    | 1.6532250  | 0.06744128 | 0           | 0.4850578   | 0.04353028  | 0.2578332  |
| 0.1263253    | 0.4242825  | 0          | 0.4002187   | 1.1993870   | 0.1948739   | 0.1338591  |
| 0.2083732    | 0.8161928  | 0.4801160  | 1.000391    | 1.3648561   | 1.4778240   | 0.04168945 |
| 0.1737701    | 0.04112677 | 1.0044150  | 0.07415557  | 0.2106178   | 0.07734081  |            |
| 0.04367207   | 0.3011529  | 0.0717737  | 0.2045879   | 0.52024     | 0.2859721   |            |
| 0.2284042    | 0.4562384  | 0.1518865  | 0.3724257   | 0.4419998   | 0.1504413   |            |
| 0.1791055    | 0.1710118  | 0.8349759  | 0.1627103   | 0.4129906   | 0.01567742  |            |
| 0.5509257    | 0.6436488  | 0.16968    | 0.3520010   | 0.06138886  | 0.3949970   | 0.255475   |
| 0.3412619    | 0.3128846  | 0.4620319  | 0.0934960   | 0.2843213   | 0.221243    |            |
| 0.1343420    | 1.931891   | 0.2292220  | 0.1509834   | 0.5829273   | 1.0684350   | 0.3530567  |
| 0.8979922    | 0          | 0.07004873 | 1.2307310   | 0.03174083  | 0.2632329   | 0          |
| 0.2566316    | 0.09659457 | 0.111148   | 0.3068038   | 0.03180106  | 0.9846508   |            |
| 0.4233585    | 0.04579005 | 0.2010368  | 0.09091768  | 0.1916549   | 0.1948739   |            |
| 0.09788626   | 0.1906616  | 0.1979428  | 0.008670025 | 0           | 2.4726630   | 0.08627623 |
| 0.1760005    | 0          | 0.2245783  | 0.2146355   | 0.3088364   | 0.3923139   | 0.4005333  |
| 0.06138886   | 0.6423980  | 0.06017651 | 0.04843687  | 0.5562507   | 0.04747637  |            |
| 1.1456466    | 9.272520   | 0.2131222  | 0           | 0           | 0.2088369   | 0.07267632 |
| 0.02246536   |            |            |             |             |             |            |
| 1.3038650    | 0.07029501 | 0.1070084  |             |             |             |            |
| TCGA-LT-A8JT | 641        | 0          | 0.2997982   | 0.3624159   | 0.04727164  | 0.3375929  |
| 0.04000695   | 85.222180  | 0.3221062  | 0.5233341   | 0.3588973   | 0.180324    |            |
| 0.1869877    | 0.7686779  | 0.7731539  | 0.1479220   | 0.0231069   | 0.06171356  | 0          |
| 0.05678406   | 0.1553211  | 0.04278521 | 0           | 2.8866217   | 6.518760    | 0.04800834 |
| 0            | 0          | 0          | 0           | 0           | 0           | 0          |
| 0.04679294   | 0          | 1.4899730  | 0.4237773   | 0.05600973  | 1.5471750   | 0.1979042  |
| 0.2223544    | 0.2635081  | 0.4303040  | 0.07697329  | 0.006062056 | 0.05606338  |            |
| 0.5573336    | 0.1683352  | 0          | 13.445740   | 0.2480968   | 0.1472766   | 0.01618495 |
| 0.8401459    | 1.8007547  | 1.965130   | 0.1733885   | 0.8036178   | 0.1152320   | 0.8414648  |
| 0            | 0.0360138  | 1.1124150  | 0.04620803  | 0.2634187   | 0.4657187   | 0.02800486 |
| 0.0244462    | 0.2398611  | 0.4298421  | 0.3630090   | 0.08420597  | 0.005779615 |            |
| 0.3073550    | 0.2071335  | 0.4675672  | 1.1326788   | 6.014940    | 0.1971542   | 0.2129168  |
| 0.01632312   | 0.2371543  | 0.04295091 | 0.1473940   | 0.4055877   | 0.1982114   |            |
| 0.4238188    | 0          | 0.1769938  | 0.1042968   | 0           | 0.1346682   | 0.6634999  |
| 0            | 0          | 0          | 0           | 0           | 0           | 0          |
| 0.1174780    | 1.436323   | 0.0611352  | 0.01861886  | 0.8562583   | 0.03360584  | 0          |
| 0.2049012    | 1.61853    | 0.00612737 | 0           | 0           | 0.1574379   | 1.9433280  |
| 0.6240312    |            |            |             |             |             |            |
| 0.06770407   | 0.1280222  | 0.8046622  | 0.2358304   | 0.8801529   | 0.3603969   | 0          |
| 0.1973296    | 1.4210660  | 0.1307774  | 0           | 0.1317093   | 0.3067753   | 0.2445793  |
| 0.04706101   | 1.56272    | 0          | 0.1234271   | 0.2381684   | 1.9023650   | 0.1157173  |
| 0.8853417    | 0.08401459 | 0.4093734  | 0.05500955  | 0.2302179   | 0.3853642   |            |
| 0.1540268    | 1.2831320  | 0.3535040  | 0.2486531   | 0.03422817  | 0.2903122   | 0.269173   |
| 1.46638      | 1.3087490  | 0.07320083 | 0           | 0.0323699   | 0.03974884  | 0.3152786  |
| 1.4300360    | 1.115687   | 0          | 0.5938927   | 0.1440250   | 0.4976249   | 0.04644023 |
| 0.1336941    | 0          | 0.3862163  | 2.1183730   | 0.04776023  | 0.2362072   | 0.1969791  |
| 0.8401459    | 0.8761621  | 0.3658317  | 0.7701338   | 1.4911410   | 0.04597813  |            |
| 0.2768223    | 0.04535757 | 0.6878720  | 0.05452274  | 0.0663670   | 0.05249048  | 0.0602059  |
| 0.04981997   | 0          | 0.1692257  | 1.5163610   | 0.3942384   | 0.2519006   | 0.8386211  |

|              |             |            |             |             |             |            |
|--------------|-------------|------------|-------------|-------------|-------------|------------|
| 0.1641612    | 0.5836803   | 0.04062244 | 0.0331835   | 0.08465592  | 0.3772084   |            |
| 0.9208717    | 0.08972432  | 0.7606447  | 0.01729019  | 0.6780823   | 0.5000289   |            |
| 0.1295552    | 0.3019428   | 0.06770407 | 0.1711408   | 0.1690538   | 0.3763683   |            |
| 0.2673091    | 0.1389715   | 0.1202998  | 0.06508173  | 0.5051961   | 0.1220014   | 0          |
| 0.2130629    | 0.1192465   | 0.5328493  | 0.7634369   | 1.0773460   | 0.1946882   |            |
| 0.4339827    | 0.1130157   | 0.1931370  | 0.5249830   | 0.1935415   | 0           | 0.01634477 |
| 0.1661274    | 0.1065315   | 0          | 0           | 0           | 0.7608995   | 0.5393620  |
| 0.06684705   | 0.1878852   | 0.1432807  | 0.1306836   | 0.08411017  | 0.2183056   | 0          |
| 0.5603434    | 3.5224150   | 0.04757583 | 0.3342938   | 0           | 0.1548008   | 0.03492523 |
| 0.4310338    | 1.0546380   | 0.09299728 | 0.02256802  | 0.4530435   | 0.0331835   |            |
| 0.1335492    | 0.3439169   | 0.05236037 | 1.6245013   | 0.8749790   | 0.2649616   | 0.02079101 |
| 0            | 0.5758009   | 0.01603054 | 0           | 0.8429633   | 0.009120755 | 0.2541895  |
| TCGA-FJ-A3Z9 | 385         | 1          | 0.2018786   | 0.3728927   | 0.0665575   | 0.2206861  |
| 53.451850    | 0.2134207   | 1.1722510  | 0.25266     | 0.7435424   | 0.2157391   | 1.131478   |
| 0.7824204    | 0.07934141  | 0.01952043 | 0.1737829   | 0.008608661 | 0           | 0.03280334 |
| 0.03012035   | 0           | 4.20116364 | 0.095970    | 0.08449345  | 0           | 0.2534804  |
| 0.1317670    |             |            |             |             |             |            |
| 2.3102920    | 0.0608037   | 0.2294884  | 0           | 1.5170930   | 0.2126502   | 0.07826762 |
| 0.3180120    | 0.2889482   | 0.08805616 | 0.03414101  | 0.08724515  | 0.1284078   |            |
| 0.04740252   | 0.04245348  | 26.472220  | 0.3493152   | 0.06912081  | 0.02278808  |            |
| 0.7393177    | 1.1959558   | 0.0702360  | 0.2929529   | 0.9900428   | 0.08112214  | 0          |
| 1.6750130    | 0.1411789   | 0.0228998  | 2.2891470   | 0.1854441   | 0.3688439   | 0          |
| 0            | 0           | 0          | 0           | 0           | 0           | 0          |
| 0.1517291    | 0.3851329   | 0.5111093  | 0           | 0.04882548  | 0.3442326   | 0.1847051  |
| 0.3761856    | 1.0485854   | 0.2810020  | 0.06939729  | 0.02855072  | 0           | 0.06260782 |
| 0            | 0           | 0          | 0           | 0           | 0           | 0          |
| 0.2175464    | 0.2790776   | 0.4309704  | 0           | 0.1780026   | 0.1021550   | 0.2370126  |
| 0.6672816    | 0.09099295  | 0.2756778  | 0.1383688   | 0           | 0.01497999  | 1.1213320  |
| 0            | 0.1146083   | 0.5908148  | 0.004313606 | 0.1506453   | 0           | 0.04433387 |
| 6.0195660    | 0.5020704   | 0.04766297 | 0.03004212  | 0.4565611   | 0.2490333   |            |
| 0.7931119    | 0.2174706   | 0.05399167 | 0.2778361   | 1.6980750   | 0.1216074   |            |
| 0.4296412    | 0.006497873 | 0.06181469 | 0.4319333   | 0.9346988   | 0.05383701  |            |
| 2.1244070    | 0.08689143  | 0.3022749  | 1.7349320   | 0.3851016   | 0.55615     | 0.1774362  |
| 0.1383335    | 0           | 0.04630602 | 0.5827765   | 0.2168665   | 0.7455907   | 0.7821416  |
| 0.09724956   | 0           | 0.3633366  | 0.25266     | 0.3361031   | 1.8588560   | 0          |
| 0            | 0           | 0          | 0           | 0           | 0           | 0          |
| 0.1119311    | 0.1109765   | 2.5168260  | 0.05236214  | 0.08301111  | 0.4723509   |            |
| 0.2027843    | 0.3002767   | 0.1307738  | 0.2823579   | 0.09692359  | 0.2330506   |            |
| 1.6893960    | 0.2689817   | 0.2078593  | 0.1848951   | 2.0278430   | 0.7240803   | 0.06540744 |
| 0.6900299    | 0.6347313   | 0.4531539  | 0.08994464  | 0.0957938   | 1.144602    |            |
| 0.03838346   | 0.4204952   | 0.02771457 | 0.01695374  | 0           | 0.1114517   | 0.3044515  |
| 0.8655427    | 0.3700531   | 0.1773355  | 0.5195351   | 0.1933992   | 1.4686050   | 0          |
| 0.3973127    | 0.08851695  | 0.6482843  | 0           | 0.4681495   | 0.02434423  | 0.7528305  |
| 0.3080133    | 0           | 0.2884806  | 0.04766297  | 0.1095285   | 0.1190121   | 0.3394793  |
| 0.2326625    | 0.1304460   | 0.06775189 | 0.09163374  | 0.7603614   | 0.1717755   |            |
| 0.05215227   | 0.2999883   | 0.0805904  | 0           | 2.3761031   | 0.2798680   | 0.2398524  |
| 0.7520477    | 0.1735897   | 0.05438659 | 0.3829872   | 0.1971514   | 0.3179195   | 0          |
| 0.007671034  | 0.3551875   | 0.4124839  | 0.2308114   | 0           | 0.09876274  | 0.5304649  |

|                    |                            |                            |                            |                           |                    |                    |
|--------------------|----------------------------|----------------------------|----------------------------|---------------------------|--------------------|--------------------|
| 1.6066640.07110378 | 0.1702769                  | 0                          | 0.09920197                 | 0.5043408                 | 0.1519999          |                    |
| 0.08881906         | 0                          | 0                          | 0                          | 2.1331130.2009574         | 0.1518319          | 0.6245756          |
| 0.1598346          | 0.1584496                  | 0.2843455                  | 0.7234172                  | 0.4910186                 | 0                  | 0.4546563          |
| 0.09344339         | 0.4888899                  | 0.8441272                  | 0.03686117                 | 1.6264992.8829430.1444105 |                    |                    |
| 0.02927332         | 0                          | 0                          | 0                          | 0.06976939                | 0.9948806          | 0.1027347          |
| TCGA-DK-A1AC       | 3981                       | 0                          | 0.2027029                  | 0.1083834                 | 0.08168024         | 0.2916619          |
| 76.183140.03923461 | 0.2291736                  | 0.1438602                  | 0.1550339                  | 0.1112787                 |                    |                    |
| 0.8997279          | 0.3924203                  | 1.5446640.3529620.09183028 | 0.1599515                  | 0.9508196                 |                    |                    |
| 0.7849333          | 0.03354724                 | 0.01848205                 | 0.1388564                  | 4.30576646.885170.2021984 |                    |                    |
| 0.02421302         | 0.05184574                 | 0                          | 0                          | 0.3258875                 | 0.1119286          | 0.2534680.09677871 |
| 0.5489913          | 0.4724404                  | 0.1200638                  | 0.2927014                  | 0.4175142                 | 0.1288452          |                    |
| 0.03142372         | 0.1695250.1138105          | 0.1745190                  | 4.9507160.2143421          | 0                         |                    |                    |
| 0.01398291         | 0.2268251                  | 0.4990152                  | 3.5957750.2097175          | 1.1282080.1592867         |                    |                    |
| 0.06003191         | 0.1671218                  | 0.6063982                  | 0.01505514                 | 0.2587486                 | 0.03992122         |                    |
| 0.0758598          | 0.1257361                  | 0                          | 0.0601113                  | 0.1111217                 | 0.10128            | 0.20908            |
| 0.1091241          | 0.01997309                 | 0.2595030.04772054         | 0.3462449                  | 0.4386947                 |                    |                    |
| 2.5922870.2129132  | 0.06131619                 | 0                          | 0.2689160.03710725         | 0.1018723                 |                    |                    |
| 0.7508693          | 0.1284329                  | 0.2441043                  | 1.0335590.3058260.07443603 | 0.07160756                |                    |                    |
| 0.05817299         | 0.2866139                  | 0.05583387                 | 0                          | 0.03265539                | 0.08802914         | 0.1057059          |
| 0.4374928          | 0.02903361                 | 0                          | 0.09942414                 | 1.0185310.00794057        | 0                  | 0.1041423          |
| 0.08161067         | 0.3357859                  | 0.2567281                  | 0.05849263                 | 0.1751234                 | 0.269773           |                    |
| 0.4584255          | 1.0037330.1779219          | 0.09938892                 | 0.1420684                  | 0.4765507                 |                    |                    |
| 0.03730955         | 0.5272614                  | 0.01196141                 | 0.1896495                  | 0.6957225                 | 0.09055853         |                    |
| 0.2719014          | 0.4655536                  | 0                          | 0.05331715                 | 0.2811149                 | 1.2139790.06361947 |                    |
| 0.5883746          | 0.2177521                  | 0.8558968                  | 0.1425758                  | 0.1420684                 | 0.4377462          |                    |
| 2.3065590.4399032  | 0.1745190.1581334          | 0.05914254                 | 0.2508139                  | 0.1162754                 |                    |                    |
| 0.3535458          | 0.2578762                  | 0.06324153                 | 0.09841903                 | 0.05593165                | 0.1717042          |                    |
| 0.1702397          | 0.06177364                 | 0.2891678                  | 0.2037446                  | 0.3955892                 | 0                  | 0.3070863          |
| 0                  | 0.2310089                  | 0.1784188                  | 1.7636840.4694148          | 0.06189336                | 0.2040701          |                    |
| 0.7658067          | 2.1256750.2040491          | 0.2207394                  | 1.2399770.2097175          | 0.5958391                 |                    |                    |
| 0.1563734          | 0.01959324                 | 0.2855650.04710468         | 0.2293499                  | 0.03401169                |                    |                    |
| 0.05201462         | 0.6025844                  | 0.1709688                  | 0.1462018                  | 0.1770342                 | 0.1589469          |                    |
| 0.4624604          | 0.1159237                  | 0.1823481                  | 1.3493840.2105735          | 0.05733748                |                    |                    |
| 0.3413112          | 0.4888312                  | 0.3693778                  | 0.1162754                  | 0.8066880.01493778        |                    |                    |
| 0.3695534          | 0.5939969                  | 0.2736034                  | 0.2701786                  | 0.1754779                 | 0.3629202          |                    |
| 0.4868441          | 0.1930647                  | 0.5248648                  | 0.04002127                 | 0.1321428                 | 0                  | 0.255857           |
| 0.05270128         | 0.1600049                  | 0.1840748                  | 0.5989041                  | 0.9782496                 | 0.1388564          |                    |
| 0.8725949          | 0.1366625                  | 0.3172547                  | 0.1597736                  | 0                         | 1.34422            | 0.06048669         |
| 0.3344186          | 0.08404467                 | 0.007060495                | 0.7760982                  | 0.1380561                 | 0                  | 0                  |
| 0.1212029          | 1.4870731.2779660.04362975 | 0.2437937                  | 0.08662832                 | 0.2637742                 |                    |                    |
| 0.4332535          | 0.3436195                  | 0.05449996                 | 0                          | 0                         | 0.5332184          | 2.2578390.1233088  |
| 0.09316503         | 0.04258263                 | 0.1159075                  | 0.05028917                 | 0.2942660.4906192         |                    |                    |
| 0.1205169          | 0.09748771                 | 0.5871073                  | 0.1433437                  | 0.2538343                 | 0.5099316          |                    |
| 0.04523651         | 0.4678268                  | 2.8912570.08491912         | 0.1436984                  | 0.09476847                |                    |                    |



|                    |                    |                   |                    |                    |                    |            |            |            |  |  |  |
|--------------------|--------------------|-------------------|--------------------|--------------------|--------------------|------------|------------|------------|--|--|--|
|                    | 0.09949213         | 0.02769902        | 0.06421644         | 0.1285190          | 0.109803           |            |            |            |  |  |  |
| TCGA-C4-A0F1       | 89                 | 0                 | 0.1435333          | 0.09767662         | 0                  | 0.1569052  | 0.02002461 |            |  |  |  |
| 71.989940          | 0.2181256          | 0.1428783         | 0.1796383          | 0.07736339         | 0.1793859          |            |            |            |  |  |  |
| 0.1748842          | 0.2418659          | 0.3243621         | 0.04394951         | 0                  | 0.2264643          | 0.2273763  |            |            |  |  |  |
| 0.05441983         | 0                  | 0.05363114        | 0.9347203          | 120.56590.1441772  | 0.08416714         |            |            |            |  |  |  |
| 0.2402954          | 0.04684239         | 0                 | 0.2265642          | 0.04323071         | 0.06526541         | 0.1401723  |            |            |  |  |  |
| 0.1382866          | 0.1042702          | 0.04173551        | 0                  | 0.1855576          | 0.05297506         | 0.1153008  |            |            |  |  |  |
| 0.1092914          | 0.01014405         | 0                 | 1.2979090.8623366  | 0                  | 0.09828814         | 0.05670718 |            |            |  |  |  |
| 0.1051292          | 0.1360496          | 6.8997970         | 1.4748560.02307075 | 0.2782367          |                    |            |            |            |  |  |  |
| 0.2130091          | 1.7733190.01395556 | 0.08566085        | 0                  | 0                  | 0                  | 0          | 0.03827914 |            |  |  |  |
| 0.0782357          | 0.06056544         | 0.7586546         | 0                  | 0.1328617          | 0.02073524         | 0.05731361 |            |            |  |  |  |
| 0.1694390.08009846 | 0.02467032         | 0.01014961        | 0.005446789        | 0.02967561         |                    |            |            |            |  |  |  |
| 0.07166051         | 0.2360797          | 0.1160047         | 0.04960521         | 0.1414222          | 0.5987943          |            |            |            |  |  |  |
| 0.1012462          | 0.1134859          | 0                 | 0.03370263         | 0.1897717          | 0                  | 0          | 0.01513517 |            |  |  |  |
| 0.1019997          | 0.005325297        | 0.07373447        | 0                  | 0                  | 0.1657801          | 1.08016    | 0.03680307 |            |  |  |  |
| 0.05355353         | 0.08044671         | 0.03152086        | 1.21046            | 0.1189887          | 0.1694390.06407876 |            |            |            |  |  |  |
| 0.1683161          | 0.1180398          | 0.6931186         | 0.05153967         | 0                  | 0.06584606         | 0.533463   |            |            |  |  |  |
| 0.08646142         | 0.08727709         | 0.03233938        | 0.04394951         | 0                  | 0.03497683         | 1.301434   |            |            |  |  |  |
| 0.05394386         | 0                  | 0                 | 0.02686424         | 1.70961            | 0                  | 0.3545109  | 0          | 0.4835711  |  |  |  |
| 0.02753384         | 0.03292303         | 0.02143175        | 0                  | 0.5403005          | 0.1011079          | 0.02765731 |            |            |  |  |  |
| 0                  | 0.0322910          | 0.3413790.4826803 | 0                  | 0                  | 0                  | 0.03979085 | 0.03945148 |            |  |  |  |
| 0.07157734         | 0                  | 0                 | 0.1588413          | 0                  | 0.0355822          | 0          | 0          | 0.05523207 |  |  |  |
| 0.3885090          | 0.08867129         | 0.09859366        | 0.1802215          | 0.09533565         | 0.06975587         |            |            |            |  |  |  |
| 0.1051292          | 0.1041430.04602672 | 0.1065826         | 0                  | 0.07154275         | 0.02729018         |            |            |            |  |  |  |
| 0.09965571         | 0.1510696          | 0.09643124        | 0.1496179          | 0.03962044         | 0                  | 0.2461562  |            |            |  |  |  |
| 0.4472757          | 0.1891251          | 0.06716059        | 0.02683015         | 0.3895314          | 0.3659883          | 0          |            |            |  |  |  |
| 0.2259877          | 0.1888035          | 0.03292303        | 0.1796383          | 0.5334699          | 0.01730846         |            |            |            |  |  |  |
| 0.2457301          | 0.2324016          | 0.1296921         | 0.0647704          | 0.1694390.0778735  |                    |            |            |            |  |  |  |
| 0.1692324          | 0.04709575         | 0.04378772        | 0.04637279         | 0.07741734         | 0.03257525         |            |            |            |  |  |  |
| 0.03487793         | 0.06106516         | 0                 | 0                  | 0.6095958          | 0.1666914          | 0          | 0.4044315  |            |  |  |  |
| 0.1218087          | 1.3033240.02057003 | 0.1546729         | 0.0435679          | 0                  | 0                  | 0          |            |            |  |  |  |
| 0.08453722         | 0.1847811          | 0.02666101        | 0                  | 0.04234037         | 0.1053287          | 0.1922747  |            |            |  |  |  |
| 0.5560493          | 0                  | 0                 | 0                  | 0.02351047         | 0                  | 0.09100642 | 0.1262986  | 0.07284545 |  |  |  |
| 0                  | 0.2276260.7962246  | 0.02381305        | 0.04318026         | 0.2960439          | 0.04132383         |            |            |            |  |  |  |
| 0.05050087         | 0.2413926          | 0.06767646        | 0.3956561          | 0                  | 0.1688647          | 3.853354   |            |            |  |  |  |
| 0.02673807         | 0.8700058          | 0.1310393         | 0.6143489          | 1.9615770.02566855 |                    |            |            |            |  |  |  |
| 0.08325194         | 0                  | 0.1152819         | 0                  | 0                  | 0.07445772         | 0.01369559 | 0.06361454 |            |  |  |  |
| TCGA-G2-A2ES       | 1004               | 1                 | 0                  | 0.1195131          | 0.04053054         | 0.1447255  | 0.06860364 |            |  |  |  |
| 76.114350          | 0.3898909          | 0.2651438         | 0                  | 0.01104351         | 0.3874462          | 0.05991471 |            |            |  |  |  |
| 0.5800371          | 0.1147490.05943534 | 0.2910215         | 0.09436121         | 0.4138349          |                    |            |            |            |  |  |  |
| 0.0599273          | 0.01834195         | 0.2756077         | 2.48003            | 72.022720.0771791  | 0.3604422          |            |            |            |  |  |  |
| 0.2058109          | 0.04012011         | 0.07074751        | 0.5336383          | 0.2591871          | 0.05589926         | 0          |            |            |  |  |  |
| 0.3790121          | 0.09377184         | 0.05957685        | 0.1936551          | 0.1248724          | 0.02887353         |            |            |            |  |  |  |
| 0.1663228          | 0.1277611          | 0.0868829         | 0                  | 0                  | 2.9543360.2836231  | 0.1894117  |            |            |  |  |  |

|              |             |             |            |             |            |            |                  |
|--------------|-------------|-------------|------------|-------------|------------|------------|------------------|
| 0.0346923    | 0.7653594   | 0.2330506   | 6.5114790  | 0.05946507  | 0.6316009  |            |                  |
| 0.1580792    | 0           | 0.1741477   | 0          | 0.04083879  | 0.9904651  | 0.1584744  | 0                |
| 0.2246094    | 0           | 0.03224629  | 0.04768837 | 0.0335041   | 0.1037476  | 0.3609896  |                  |
| 0.03468796   | 0.07785969  | 0.05327866  | 0.2372616  | 0.4643939   | 0.3430182  |            |                  |
| 0.02112992   | 0.09562362  | 0.009330257 | 0.08895918 | 0.09820258  | 0.05055005 |            |                  |
| 0.1159165    | 0.04248644  | 0.06056347  | 0          | 0.2601495   | 0.07775977 | 0.07106476 |                  |
| 0.02886601   | 0.2438068   | 0           | 0          | 0.006481571 | 0.05241712 | 0.01596375 |                  |
| 0.1263059    | 0.02881353  | 0           | 0.2623191  | 0.65103     | 0.1628612  | 0          | 0.06890192       |
| 0.02699735   | 0.1481069   | 0.2293038   | 0.02902462 | 0.03201503  | 0.2986198  |            |                  |
| 0.1011001    | 0.5835883   | 0.08828658  | 0          | 0.02819829  | 1.2344490  | 0.07405347 |                  |
| 0.2616323    | 0.007913829 | 0           | 0.2959066  | 0.08987207  | 0.3530620  | 0.5544294  | 0                |
| 0.05291299   | 0.1092927   | 0.6394582   | 0.04509801 | 0.2802790   | 0.1080507  |            |                  |
| 0.7441102    | 0.18866     | 0.08459488  | 0.07954314 | 0.04402067  | 1.0477650  | 0.1298971  |                  |
| 0.09771405   | 0           | 0.1106279   | 0          | 0.2923882   | 0.6201173  | 0          | 0.08326151       |
| 0            | 0.1013696   | 0.1226108   | 0.0637724  | 0.1011001   | 0.6607959  | 0          |                  |
| 0.3352343    | 0.3185415   | 0.02865722  | 0.02951106 | 1.0407280   | 0.2662037  | 0          |                  |
| 0.0253154    | 0.08444463  | 0.2058109   | 0.3200844  | 0.2688539   | 0.3901832  |            |                  |
| 0.5054531    | 0           | 0.06390097  | 0.01944471 | 0.1991462   | 0.1168690  | 0.08535426 |                  |
| 0.09563596   | 0.02064813  | 0.2847698   | 0          | 0.08866829  | 0.2459692  | 0.4337906  |                  |
| 0.08099204   | 0.2300899   | 0.04595959  | 0.08340759 | 0.2786363   | 0.08535426 |            |                  |
| 0.1693620    | 0.1078057   | 0.08459488  | 0.3461820  | 0.4959648   | 0.01482455 | 0.6855764  |                  |
| 0.2526404    | 0.2221604   | 0.1017047   | 0.4063447  | 0.2000940   | 0.05042139 |            |                  |
| 0.2416912    | 0.1191537   | 0.04420486  | 0          | 0.1194906   | 0.05230179 | 0.0317584  |                  |
| 0.09133972   | 0.2917292   | 0.4283092   | 0.1378038  | 0.4329902   | 0.2399547  |            |                  |
| 0.5915361    | 0.02642708  | 0.1159165   | 0.06763441 | 0.1200564   | 0.0829709  | 0          |                  |
| 0.1588248    | 0.1582634   | 0.02283493  | 0.03513845 | 0.1450567   | 0.09021314 |            |                  |
| 0.2343547    | 0.8248124   | 0           | 0.06912734 | 0.4012011   | 0.1409556  | 0.06142419 |                  |
| 0.04384475   | 0.01802894  | 0.0623915   | 0          | 0           | 0.4546397  | 0.06118703 |                  |
| 0.01849176   | 1.6058740   | 0.1415740   | 0.04658076 | 0.07236275  | 0.1391143  | 0.05980167 |                  |
| 0.03869949   | 0.2768653   | 0.02845142  | 0          | 0.3387057   | 0.0673404  | 0.5571366  |                  |
| 1.43467      | 0.06595467  | 0.3030444   | 0.04702505 | 0.04936898  | 0.01374453 |            |                  |
| 0.04248644   | 0.1275448   | 0.007820104 | 0.1245379  |             |            |            |                  |
| TCGA-XF-AAN4 | 823         | 1           | 0.1065550  | 0.09115833  | 0          | 0.3351094  | 13.4088625.36886 |
| 1.1137220    | 0.4027133   | 0.2333512   | 1.3202470  | 0.2948194   | 12.360190  | 0.3998731  |                  |
| 0.6715330    | 0.1842621   | 3.2527250   | 0.4540415  | 0.009996356 | 1.0676450  | 0.03809116 | 0                |
| 0            | 1.7096      | 32.615860   | 0.5269421  | 2.2566130   | 44.519040  | 0.8942353  |                  |
| 2.2593630    | 0.05329627  | 0.4578634   | 0.7227261  | 5.1259030   | 0.2272104  | 2.831107   |                  |
| 0.1515279    | 0.7629468   | 0.1982223   | 0.2050298  | 0.08283713  | 0.1100874  |            |                  |
| 0.5915625    | 0.2755531   | 0.33802     | 0.04013145 | 0.1587687   | 0.2575482  |            |                  |
| 0.0555496    | 4.5003150   | 1.0401460   | 0.9231485  | 0           | 0.7906589  | 0          | 2.820565         |
| 1.2591240    | 0.2266424   | 0           | 0.1903558  | 3.9834122   | 0.7854720  | 0.2159717  | 0.2555517        |
| 0.6429571    | 2.7534380   | 0.03779735  | 0.3426189  | 4.5605040   | 0.2028120  | 0.9408841  |                  |
| 1.5698170    | 0.2417519   | 1.7902643   | 0.6917510  | 0.1211667   | 0.7256302  | 0.04819615 | 0                |
| 0.1620321    | 0.3849552   | 0           | 0.08267848 | 0.4374191   | 0.1355111  | 0.05504369 |                  |

|              |            |            |             |            |            |            |
|--------------|------------|------------|-------------|------------|------------|------------|
| 0.2324537    | 0.2113216  | 0.06402327 | 0.1977520   | 0.06663503 | 3.9877410  | 0.6397544  |
| 3.7911092    | 3.0483810  | 6.19090    | 0.6207143   | 0.03506264 | 0.0874645  | 0          |
| 21.10696     | 1.1296820  | 4.858358   | 6.6415350   | 0.3401271  | 0.2552611  | 0.0963923  |
| 0.7482796    | 0.04208772 | 1.37929    | 0           | 1.7119510  | 0.2118153  | 0.4276271  |
| 0.03018126   | 0.1435581  | 0.25078    | 0.1713742   | 1.8418     | 0.3524080  | 0.5811343  |
| 0.1008981    | 0.1261410  | 0.6892049  | 0.05159758  | 0.7794138  | 0          | 2.0346780  |
| 0.04496873   | 31.563250  | 0.07000537 | 0           | 0.7658806  | 0.1651311  | 0.4065334  |
| 0.671533     | 0.2109528  | 0.4400823  | 0.05575458  | 1.0886340  | 0.3724990  | 0.8996896  |
| 1.1697670    | 0.1288656  | 0.3507039  | 0           | 0.0963923  | 0.2964826  | 0.3924543  |
| 0.05811343   | 0.1518542  | 0.1639366  | 0           | 2.1649422  | 0.9240770  | 0.1952131  |
| 0.09654628   | 0.3757245  | 0.7849087  | 0.06850965  | 15.674380  | 0.4578634  |            |
| 0.9638325    | 0.0751716  | 0.4874030  | 0.3337066   | 0.4819848  | 0.04457077 |            |
| 0.05425311   | 0.2360020  | 0.05905991 | 1.9005650   | 0.9991017  | 2.4121580  | 0.2793081  |
| 0.4118431    | 0          | 0.07668403 | 0.5389936   | 1.4611380  | 0.4882780  | 0.1845434  |
| 0.5139283    | 0.1075409  | 0.7334705  | 0.5585076   | 0.08480538 | 0.2821233  |            |
| 0.5693432    | 3.64793    | 0.0881534  | 0.1106923   | 1.1446590  | 0.2763932  | 0.04807347 |
| 0.3019515    | 0          | 0.08710261 | 0.05320244  | 0.1708896  | 0.1994652  | 0.1211182  |
| 0.1741728    | 3.2441540  | 0.6533835  | 0.5255476   | 0.6605243  | 0.19894    | 1.073402   |
| 0.08398828   | 0.2210375  | 16.806110  | 0.05723293  | 0.05273819 | 0          | 6.71632    |
| 0.3118470    | 0.08708641 | 0.3350220  | 0.0691510   | 0.2867076  | 0.2294807  | 0.5231728  |
| 0.9082209    | 0.1318167  | 1.47543    | 0.07679539  | 0          | 0.08360617 | 0          |
| 0.4758895    | 0          | 0.02655447 | 0.9288622   | 0.1555675  | 0          | 0.08058396 |
| 0.1518542    | 0.1459241  | 0.4385991  | 0.4200152   | 0.1900565  | 0.1106923  | 0.2521532  |
| 1.0308090    | 0.5622844  | 0.4280309  | 0.5902145   | 15.964410  | 0.07685753 |            |
| 0.1359684    | 0.1793412  | 0.09414014 | 0.4062396   | 0.08101605 | 0.5472251  |            |
| 0.007455955  | 0.02968466 |            |             |            |            |            |
| TCGA-4Z-AA83 | 2024       | 0          | 0.5124965   | 0.1534552  | 0          | 0.7774435  |
| 0.06291948   | 73.935580  | 0.08939662 | 0.3367043   | 0.2822214  | 0.2430841  | 0.469708   |
| 0.6044552    | 0.9879593  | 0.1550927  | 0.01453622  | 0          | 0.1442382  | 0.3572203  |
| 0.03664135   | 0.3028     | 0          | 3.32611962  | 7.489      | 0.07550338 | 0.02203852 |
| 0            | 0.5151433  | 0          | 1.7203980   | 0.1025355  | 0          | 1.5207890  |
| 0.1556233    | 0.1184065  | 0.5413960  | 0.1815854   | 0.05720328 | 0.05336705 | 0.3187369  |
| 0.5824350    | 0.04742056 | 12.693670  | 0.1950926   | 0.2702279  | 0.03818144 | 1.569055   |
| 0.2137412    | 6.0849760  | 0.4908428  | 1.2638610   | 0.2718404  | 0          | 1.0952140  |
| 0.0566394    | 1.0766220  | 0          | 0.4119988   | 0          | 0.04140434 | 0.2569557  |
| 0.3072812    | 0.5709094  | 0.1324319  | 0.009089682 | 0.1428172  | 0.1845983  |            |
| 0.3901853    | 1.5439476  | 8.582240   | 0.2713088   | 0.01594559 | 0.04278599 | 0.4662198  |
| 0.0450330    | 0.1390852  | 0.06074985 | 0.3117298   | 0.2592122  | 0          | 0.1192974  |
| 0.1854242    | 0.1303534  | 0          | 0.2236062   | 0.1016392  | 0          | 0.2615598  |
| 0.1281976    | 0.02928214 | 1.6652120  | 0.05285237  | 0          | 0.3399085  | 1.1627520  |
| 0.2103387    | 0          | 0.1485629  | 2.8525461   | 2.150950   | 0.1064791  | 0.03355706 |
| 0.6988601    | 0.4172555  | 0.8859063  | 0.2834006   | 0          | 0.05172385 | 1.426239   |
| 0.06791776   | 0.4799095  | 0          | 0.1380941   | 0.06030872 | 0.5495048  | 0.1989113  |
| 1.1864820    | 0          | 0.3851221  | 0.9859594   | 0.0496337  | 1.4138110  | 0.06606546 |

|                            |                                   |                           |                                   |                            |            |                    |
|----------------------------|-----------------------------------|---------------------------|-----------------------------------|----------------------------|------------|--------------------|
| 1.2554630.04325715         | 0.3103431                         | 0.1683521                 | 0                                 | 0.8328252                  | 0.3176918  |                    |
| 0.2878637                  | 0.2691556                         | 0.6087707                 | 0.4233321                         | 0.5363248                  | 1.6069090  | 0                  |
| 0                          | 0.06251355                        | 0.3099019                 | 0.9558407                         | 0.1169771                  | 0          | 0.2424183          |
| 0.07550338                 | 0.3354092                         | 0                         | 0.6307877                         | 0.05413185                 | 0.7809529  | 1.322465           |
| 0.03755659                 | 0.2321789                         | 0.2065279                 | 1.6988260.3594658                 | 0.4840234                  |            |                    |
| 1.5415270.7089952          | 0.1446209                         | 0.3181493                 | 0                                 | 0.6743850.08574868         |            |                    |
| 0.2087526                  | 0.05159532                        | 0                         | 0.2872927                         | 0                          | 0.2513579  | 0.6445411          |
| 0.3410133                  | 0.1980838                         | 0.6858338                 | 0.2529096                         | 0.4674807                  | 0          | 0                  |
| 0.0887597                  | 0                                 | 0.5689623                 | 0.2116660.8237832                 | 0                          | 0.7033083  | 0.4915015          |
| 0.1131963                  | 0.2543944                         | 0.1064791                 | 0.1957495                         | 0.2215610.2959598          |            |                    |
| 0.5579865                  | 0.2914166                         | 0.08108452                | 0                                 | 0.5205535                  | 0.1918733  | 0.05825411         |
| 0                          | 0.2625569                         | 0.2618811                 | 0.7583166                         | 1.4296130.2105048          | 0.8225368  |                    |
| 0.1131082                  | 0.1822495                         | 1.9036960.1651636         | 0.3043854                         | 0                          | 0.1885081  |                    |
| 0.1838573                  | 0.2932012                         | 0                         | 0.1330380.1103181.4638960.5444070 | 0.3169989                  |            |                    |
| 0.1051313                  | 0.2954897                         | 0.4506791                 | 0.1697840.09921093                | 0.1144441                  |            |                    |
| 0.01503818                 | 0                                 | 2.9187940.07482317        | 0.05087888                        | 0                          | 0.2921488  | 0.04882436         |
| 0.2702091.0844980.2193872  | 0                                 | 0.9020045                 | 0.1565645                         | 0.1260208                  |            |                    |
| 0.6212844                  | 0                                 | 1.93035                   | 3.8781490.1949122                 | 0.6539663                  | 0          | 0.9961272          |
| 0.02521145                 | 0.03896622                        | 0.9553127                 | 0.02151651                        | 0.04283222                 |            |                    |
| TCGA-E7-A5KE               | 17                                | 0                         | 0.5135532                         | 0.5814893                  | 0.4382238  | 0.4610569          |
| 0                          | 20.9312                           | 0                         | 0.1207586                         | 0.2205219                  | 0          | 0.3432880.02708497 |
| 0.6478091                  |                                   |                           |                                   |                            |            |                    |
| 1.2598930.5305573          | 0.0321313                         | 0                         | 0.8431242                         | 0.03290044                 | 0.2429795  |                    |
| 0.02478957                 | 0.1862451                         | 9.08267777.438170.2851123 | 0.0162382                         | 0.06953958                 |            |                    |
| 0.1626698                  | 0                                 | 1.8358450                 | 1.0199140.0649036                 | 1.34464                    | 0.09655988 |                    |
| 0.2737663                  | 0.5234588                         | 0.5369890.03902325        | 0.02809864                        | 0.1230930.1761364          |            |                    |
| 1.9116420.0698799          | 34.546870.5270695                 | 0.2844381                 | 0.05626495                        | 1.095248                   |            |                    |
| 0.9449201                  | 4.85496                           | 0.2411053                 | 1.2028330.04005896                | 0.3220781.591514           |            |                    |
| 0.0387309                  | 0.03365523                        | 1.0411620.05354547        | 0.1017491                         | 0.8432358                  | 0          |                    |
| 0.004358162                | 0.4632484                         | 0.1358448                 | 1.29701                           | 0.09757717                 | 0.02009211 |                    |
| 0.5180514                  | 0.2960303                         | 0.6413294                 | 3.0989693.8942160                 | 0.01174887                 | 0          |                    |
| 0.1889335                  | 0                                 | 0                         | 0.7161777                         | 0.7464784                  | 0.7093923  | 0                  |
| 0.2929985                  |                                   |                           |                                   |                            |            |                    |
| 0.05780179                 | 0.09604569                        | 0.5851964                 | 0.7688581                         | 0                          | 0.04537752 | 0.2014799          |
| 0.07084296                 | 0.003082197                       | 0.8855341                 | 0.1557686                         | 0.06050336                 | 0.4195818  |                    |
| 2.0607770.04970241         | 0.03099593                        | 0                         | 0.03648755                        | 4.2536122.4448420.03922745 |            |                    |
| 0.2657957                  | 2.1571280.1707991.3734840.4176249 | 0.1777443                 | 0.114332                          |                            |            |                    |
| 3.8784580.3002550.6566898  | 0                                 | 0.2543728                 | 2.48842                           | 1.25513                    | 0.04090042 |                    |
| 2.18553                    | 0                                 | 0.1072697                 | 0.3926023.1187890.0121902         | 0.4892880.7788432          |            |                    |
| 0.5075850                  | 0.07622131                        | 0.7690701                 | 0.1189899                         | 1.2036671.4044710.3041447  |            |                    |
| 0.07932663                 | 0.4485485                         | 0.1559577                 | 0.1975848                         | 1.9954830                  | 0          | 0                  |
| 0                          |                                   |                           |                                   |                            |            |                    |
| 2.6030633.8527880.2154747  | 0.03415979                        | 1.0034030                 | 0.5354547                         | 0                          |            |                    |
| 0.8133490.1196547          | 1.3426331.4653560.4427533         | 0.1368574                 | 0.2282578                         |                            |            |                    |
| 4.5896121.0329460.08074718 | 1.5820251.5671850.1065582         | 0.37013                   | 0.05255997                        |                            |            |                    |
| 2.3084850.1895415          | 0.8459608                         | 0.09884148                | 0                                 | 0.03848731                 | 0          | 0.2832517          |
| 1.1397710.5482082          | 0.07297509                        | 1.2438880.5823325         | 2.3923240.1882918                 | 0                          |            |                    |

|              |             |             |            |            |            |            |            |
|--------------|-------------|-------------|------------|------------|------------|------------|------------|
| 0.06539905   | 0           | 0.9146558   | 0.1559577  | 1.3458940  | 1.1631440  | 0.4759598  | 0          |
| 0.3498887    | 0.1961373   | 0.7031224   | 0.2285477  | 0.3748013  | 0.416762   |            |            |
| 0.1610390    | 0.2608817   | 0           | 1.51401    | 0.3534355  | 0          | 0.6172389  | 0.0515879  |
| 0.4245046    | 2.234941    | 3.3161130   | 0.8178111  | 1.3797390  | 0.1309617  | 0.04476111 |            |
| 0.1607546    | 0           | 0.3737904   | 0          | 0.01578348 | 0.1711174  | 0.2160336  |            |
| 0.04749044   | 0.09802375  | 0.04064173  | 1.2241411  | 1.3596260  | 0.07007041 | 0          |            |
| 0.1360749    | 0.5811137   | 0.2567812   | 0.2436654  | 0.08432358 | 0          | 0          |            |
| 5.1350990    | 0.1378262   | 0.1624483   | 0          | 0.3348461  | 0.08543892 | 0.3981855  |            |
| 1.4884620    | 0.08082336  | 0.1830614   | 0.6255117  | 0.07690553 | 0.6809251  |            |            |
| 0.8455257    | 0           | 2.3844473   | 0.8524680  | 0.3268440  | 0.02409245 | 0          | 0.6672333  |
| 0.009288027  | 0.05742142  | 1.4221330   | 0.0525987  |            |            |            |            |
| TCGA-ZF-AA4V | 1806        | 0           | 0.01288773 | 0.08269142 | 0.09347726 | 0.1192094  |            |
| 0.05933378   | 26.381550   | 0.2622729   | 0.3527954  | 0.08871264 | 0.08914538 |            |            |
| 0.1412272    | 0.2418216   | 0.5494385   | 0.1671476  | 0.3838189  | 0.1525443  |            |            |
| 0.006045254  | 0.08421569  | 0           | 0.08460557 | 0.1589113  | 1.84349828 | 0.93469    |            |
| 0.1008674    | 0.1939706   | 0           | 0.04626533 | 0          | 1.7155940  | 0.3842833  | 0.03223069 |
| 0            | 0.1092664   | 0.05664211  | 0.1099236  | 0.5582934  | 0.04581792 | 0.06183562 |            |
| 0.1798111    | 0.05688995  | 0.03005724  | 1.6310840  | 1.1849920  | 0.2861826  |            |            |
| 0.09707731   | 0.008001228 | 0.6749217   | 0.2687471  | 3.4702450  | 0.2979588  |            |            |
| 0.03417981   | 0           | 0.7841622   | 0          | 0.02412136 | 1.4382950  | 0          | 1.237506   |
| 0.0276891    | 0.01301492  | 0.4846243   | 0.0772719  | 0.4486449  | 0.1248848  |            |            |
| 0.03428669   | 0.05525262  | 0.06826598  | 0.1792572  | 0.2008221  | 1.5822340  | 0.1949312  |            |
| 0.01002458   | 0.03227813  | 0.1025851   | 0.05662216 | 0          | 0.1336715  | 0.04899411 |            |
| 0.2328       | 0           | 0.04999946  | 0.06725271 | 0.3277992  | 0          | 0.4685847  | 0          |
| 0.02989743   | 0.02014863  | 0.005259693 | 0.1228941  | 0.03322692 | 0.1032475  |            |            |
| 0.2580952    | 0.3161047   | 0.02423312  | 0          | 0          | 0.03113254 | 3.5439461  | 0.057706   |
| 0.03347034   | 0.0369188   | 0.6649701   | 0.05829283 | 0.2552671  | 0.1272619  | 0          |            |
| 0.06503489   | 2.0151280   | 0.04269814  | 0.4310095  | 0.03650398 | 0.04340808 |            |            |
| 0.6066325    | 0.2418216   | 9.6230630   | 0.1598379  | 0.2811508  | 0.03050885 |            |            |
| 0.1392998    | 0.6732822   | 0.04160456  | 1.4813770  | 0.08306729 | 1.0604650  | 0.0543893  |            |
| 0.03251744   | 0.3598513   | 0.05076334  | 1.7016210  | 0.1997246  | 0.1195101  | 0          |            |
| 0.2551456    | 0.04435632  | 0           | 0.9194156  | 0          | 0.0281584  | 0          | 0.3506892  |
| 0.7069557    | 0.03677023  | 0.2040249   | 0.6096084  | 0.6170713  | 0.1054316  |            |            |
| 0.04591659   | 0.29742     | 0           | 0.6000682  | 0.4125021  | 0.09444343 | 0.2335438  |            |
| 1.2334680    | 0.4746702   | 0.0715625   | 0.2353965  | 0.06922274 | 0.3085802  |            |            |
| 0.04545971   | 0.01052696  | 0           | 0.7684427  | 0.05390798 | 0.2624747  | 0.09730992 |            |
| 0.05952705   | 0.1313553   | 0           | 0.1022497  | 0.3241650  | 0.4287725  | 0.3735905  |            |
| 0.09949984   | 0.09274869  | 0.4435113   | 0.2409864  | 0          | 0.02790046 | 0.1864776  |            |
| 0.09755233   | 0.04435632  | 0.3737823   | 0          | 0.4109127  | 0.2118818  | 0.1423271  |            |
| 0.04264832   | 0.2342924   | 0.8768214   | 0          | 0.06977335 | 0.3363756  | 0.04580151 |            |
| 0.09685391   | 0           | 1.2229130   | 0.1809387  | 0          | 0.1579954  | 0.2420920  | 0.03292757 |
| 0.6753732    | 0.8654734   | 0.1203081   | 0.4070847  | 0.02031662 | 0.1527674  |            |            |
| 0.02689449   | 0.1730569   | 0           | 0          | 0.2908885  | 0.3285085  | 0.05266514 | 0          |
| 0.1040311    | 0.1168653   | 0.3203662   | 0.04993116 | 0.05978671 | 0.09913998 |            |            |

|              |             |            |             |            |             |              |
|--------------|-------------|------------|-------------|------------|-------------|--------------|
| 0.04644169   | 0           | 0.0730318  | 0.2494854   | 0          | 0.009454115 | 0.3854089    |
| 0.8238641    | 0.04703939  | 0.03198624 | 2.1442440   | 0.1836664  | 0.03069461  |              |
| 0.1519920    | 2.005282    | 0.02298717 | 0.02231356  | 0.3430993  | 0           | 0 1.116615   |
| 0.05176998   | 1.2849472   | 5.142820   | 1.140855    | 0.2877922  | 0           | 0.05693085   |
| 0.03169957   | 0           | 0.9069990  | 0.004508957 | 0.10771    |             |              |
| TCGA-ZF-AA53 | 1761        | 0          | 0           | 0.04238746 | 0.07187439  | 0.4033030    |
| 48.337460    | 0.2160652   | 0.3978529  | 0           | 0          | 0.6238943   | 0.05312455   |
| 0.5143012    | 0           | 0.1756650  | 2.345817    | 0.07437085 | 0.08633759  | 0.04723174   |
| 0.4553708    | 0.1629153   | 0.6628254  | 8.427360    | 0.03649725 | 0.3835117   | 0.3649725    |
| 0            | 0.1254593   | 0.3154405  | 2.2324720   | 0.09912834 | 0.04258013  | 0.3360584    |
| 0.04751122   | 0           | 0.05723602 | 0.06039302  | 0.1097197  | 0.1659075   | 0.05608015   |
| 0            | 0           | 0.1833793  | 0.1993112   | 0.12574    | 0.1119637   | 0.08612968   |
| 0.1033194    | 3.4120130   | 0.05272586 | 0.1018220   | 0.05256151 | 0.9508495   | 0.3823522    |
| 0.8131034    | 0.2914504   | 0.5854768  | 0           | 0          | 0.04425651  | 0.04258013   |
| 0.06290197   | 0.04228382  | 0          | 0.2299745   | 0.1920471  | 0.02636293  | 0.07434626   |
| 0.05248951   | 0.0725423   | 0.2573524  | 0.6082876   | 0.03747051 | 0.07707868  |              |
| 0.09100139   | 0.0225364   | 0.1523782  | 0.1344636   | 0.08809682 | 0           | 0.6801972    |
| 0            | 0.1537778   | 0.06894722 | 0           | 0.05118923 | 0           | 0 0.01149402 |
| 0.03098444   | 0.004044163 | 0.04899631 | 0           | 0.07938668 | 1.0157160   | 0.303815     |
| 0.2329097    | 0.1626795   | 0          | 0.1436263   | 1.6415240  | 0.6325408   | 0            |
| 0.2556468    | 0           | 0.2141172  | 0           | 0.05830474 | 0           | 1.2509120    |
| 0            | 0.4081332   | 0          | 2.0392930   | 0.1080880  | 0.05610376  | 1.1668450    |
| 0.8283828    | 0           | 0.7033502  | 0.2090988   | 0.1500154  | 0.02170107  | 0            |
| 0.4335431    | 0           | 0.01575274 | 0           | 0.1961807  | 0           | 0.1555510    |
| 0.05564928   | 0           | 0          | 0.06043631  | 0.1198417  | 0.3805033   | 0            |
| 0.1930049    | 0           | 0.1080880  | 0.07061026  | 0          | 0.05233312  | 1.3422270    |
| 0.1089259    | 0.1346784   | 0.2994979  | 0.1824863   | 0.07529627 | 0.4326237   |              |
| 0.1064503    | 0.05272586  | 0          | 0.0161883   | 0.03448207 | 0.09507984  | 0.04144968   |
| 0            | 0.2294520   | 0.01830807 | 0.4292444   | 0.06017748 | 0.01429445  | 0.06231238   |
| 0.2897205    | 0.04787544  | 0          | 0.03056322  | 0.3369059  | 0.6176458   | 0.05045401   |
| 0.04290517   | 0.5735283   | 0.05000513 | 0.3410544   | 0.3047134  | 0           | 0.09238292   |
| 0.09503391   | 0.9411402   | 0.1311687  | 0           | 0.6150463  | 0.1285193   | 0.01788284   |
| 0.06650696   | 0.1408666   | 0.04442111 | 0           | 0.1059487  | 0           | 0.1126368    |
| 0.2429644    | 0.3118514   | 0.1012717  | 0.3665594   | 0.5118923  | 0.1110055   |              |
| 0.7782858    | 0.03124279  | 0.02936561 | 0.6865458   | 0.05322516 | 0.09809035  |              |
| 0.07395496   | 0.5964356   | 0.2806546  | 0.04049407  | 0          | 0           | 0.1599785    |
| 0.06739301   | 0.6150566   | 0.2303515  | 0.03064655  | 0          | 0.2142533   | 0            |
| 0.01727813   | 0.03197143  | 0          | 0.3925390   | 0.05758788 | 0           | 0            |
| 0.1412205    | 0.07080299  | 0.2566474  | 0.1027904   | 0          | 0           | 0.1025920    |
| 0            | 1.0599530   | 0.07961157 | 0.1646653   | 3.5149530  | 0.03898666  | 1.3909190    |
| 0.07312112   | 0           | 0.01884835 | 0.006933848 | 0.09662092 |             |              |
| TCGA-ZF-A9RM | 1455        | 0          | 0.1306015   | 0.2793257  | 0.05262657  | 0.3087220    |
| 22.705330    | 0.4218758   | 0.1324131  | 0.3995532   | 0.3584841  | 0.0838461   |              |
| 0.6612643    | 1.0490230   | 2.2823063  | 0.08489069  | 0.03435224 | 0.2110111   |              |

|              |            |             |             |            |            |            |
|--------------|------------|-------------|-------------|------------|------------|------------|
| 0.03160828   | 2.7839460  | 0.1190798   | 0.4175041   | 5.4861043  | 7.7991     | 0.253872   |
| 0.03120089   | 0          | 0.6251237   | 0           | 2.12069    | 0          | 0.2540369  |
| 0.5536410    | 0.3478781  | 0.01547142  | 0.7124416   | 0.3906090  | 0.02677901 | 0.03374383 |
| 0.1691754    | 0.4512498  | 0.1874043   | 0.03356768  | 20.639531  | 3.810060   | 0.08198004 |
| 0.00900919   | 0.7599457  | 0.1891267   | 3.9443330   | 0.3474539  | 4.6223670  | 0.05131419 |
| 0.0773571    | 2.4657930  | 0.03720975  | 0.01810672  | 1.00027    | 0.05144247 | 0.2443823  |
| 0.5184753    | 0          | 0.002093498 | 0.1393214   | 0.6090441  | 1.0440040  | 0.09374483 |
| 0.01930299   | 0.2099693  | 0.1152988   | 0.5630255   | 3.2787511  | 1.491050   | 0.08230796 |
| 0.02257487   | 0          | 0.3960287   | 0.0159388   | 0.0984545  | 0.5375389  | 0.05516619 |
| 0.2359145    | 0          | 0.2533419   | 0.07067661  | 0.0922735  | 0.2623660  | 0.6331382  |
| 0.04359532   | 0.3366379  | 0.2722424   | 0.002961144 | 0.8456297  | 0.03741271 | 0          |
| 0.3468559    | 1.2012510  | 0           | 0           | 0.0350545  | 1.0576961  | 3.563610   |
| 0.06532378   | 0.4412220  | 0.1312727   | 1.89439     | 0.08597628 | 0.2134543  | 0.07322772 |
| 2.07123      | 0          | 0.4853064   | 0           | 0.04887646 | 0.4695994  | 0.7001622  |
| 0.9598596    | 0          | 0.1030567   | 0.1493792   | 1.5883990  | 0.09369147 | 0.6520343  |
| 0.5144247    | 0.5149944  | 0           | 0.03661386  | 0.5402453  | 0.05715831 | 0.9409863  |
| 2.3050730    | 0.8458404  | 0.07621107  | 0.1077329   | 0.1997766  | 1.5945270  | 0.7540636  |
| 0            | 0.03170569 | 0           | 0           | 0.5703643  | 1.07462    | 0.1242072  |
| 0.9841827    | 0.1068935  | 0.9892784   | 0.2585049   | 0.3348877  | 0.03831842 |            |
| 0.5528147    | 0.7669114  | 0.9038988   | 0.1314824   | 0.4751348  | 1.336168   |            |
| 0.6615850    | 0.06464653 | 0.5456022   | 3.3935710   | 0.3555931  | 0.05049568 | 1.273009   |
| 0.1213982    | 0.3324828  | 0.1533961   | 0.06702603  | 0          | 0.2643725  | 0.2302613  |
| 0.3650021    | 3.825280   | 0.4557085   | 0.5975169   | 0.2498928  | 1.1852830  | 0          |
| 0.1570763    | 0.2099693  | 1.0618020   | 0.04994415  | 1.1510540  | 0.01924882 | 1.355565   |
| 0.3031875    | 0.1442312  | 0.3961731   | 0.1884340   | 3.290933   | 0.5332452  |            |
| 0.2618771    | 0.5681262  | 0.5672854   | 0.1607129   | 0          | 0.8921221  | 0.1358217  |
| 0            | 0.1185994  | 0.06903248  | 0.5561349   | 0.5815236  | 1.7990810  | 0.3251137  |
| 0.6689690    | 0.2516363  | 0.06450467  | 0.2574016   | 0          | 0.6823086  | 0          |
| 0.1575469    | 0.02964984 | 0           | 0.1412608   | 0.03904552 | 0.9704576  | 2.6863910  |
| 0.2019552    | 0          | 0.1045844   | 0.1595115   | 0.0885576  | 0.7022863  | 0.1620235  |
| 0            | 0.4972471  | 5.1442470   | 0.1059304   | 0.1800787  | 0.05487197 | 0.1608475  |
| 0.1209649    | 0.4463046  | 1.0386340   | 0.8800222   | 0.05024906 | 0.6438693  |            |
| 0.03694253   | 0.1784132  | 0.9675376   | 0           | 1.6879564  | 0.0320610  | 2.473996   |
| 0.06105932   | 0.1923083  | 0.02676972  | 0           | 0.3174184  | 0.04061582 | 0.2324513  |
| TCGA-CU-A72E | 413        | 1           | 0.04549066  | 0.1216172  | 0.08248817 | 0.1788320  |
| 32.540460    | 0.4628808  | 0.1245285   | 0.07828368  | 0.02247587 | 0.6956325  |            |
| 0.1524238    | 0.5691684  | 0.05531171  | 0.1834612   | 0.02692227 | 0.2133832  |            |
| 0.3220333    | 0.2439293  | 0.09332429  | 0.1402299   | 2.07652    | 49.263140  | 0.09948127 |
| 0.3301090    | 0.1570757  | 0           | 0.1439861   | 1.1025220  | 0.1507144  | 0.05688338 |
| 0.2199060    | 0.2169476  | 0.1317742   | 0.07275085  | 0.2627525  | 0.1328467  |            |
| 0.09654036   | 0.04760182 | 0.1506061   | 0.05304749  | 0.1174968  | 0.0526148  |            |
| 5.8329670    | 0.07215408 | 0.06424876  | 0.01412122  | 0.8704611  | 0.02964419 |            |
| 4.7501620    | 0.1210239  | 0.9640805   | 0.2211856   | 0.1818771  | 0.4894471  |            |
| 3.1203050    | 0.05676182 | 0.3359675   | 0.04031609  | 0.07661016 | 0.4571274  |            |

|              |            |            |            |            |                  |
|--------------|------------|------------|------------|------------|------------------|
| 0.04886799   | 0.1575072  | 0.1031219  | 0.1363758  | 0.2639352  | 0.4040793        |
| 0.02521332   | 0.1340822  | 0.07831292 | 0.1665094  | 1.1518881  | 7801910.06450575 |
| 0.1238454    | 0.1186815  | 0.2198472  | 0.08744002 | 0.07715999 | 0.3033186        |
| 0.08646883   | 0.5546673  | 0.06958549 | 0.1985471  | 0.07517231 | 0.07231586       |
| 0.05874841   | 0.3307987  | 0          | 0          | 0.0659568  | 0.3911595        |
| 0.2932080    | 0.8796239  | 0.4555491  | 0.4065283  | 7.2176710  | 1897857          |
| 0            | 0.4120895  | 0.7158933  | 0.4926082  | 0.1772136  | 0.1023901        |
| 0.15432      | 0.5119504  | 0.04492044 | 0.1338294  | 0.05738946 | 1.1093550        |
| 0.1901703    | 0.02013288 | 0          | 0.5018601  | 0.1829086  | 0.3207837        |
| 0            | 0.02692227 | 0.1463379  | 1.9427170  | 0.01835679 | 0.4753556        |
| 1.0036610    | 0.04799535 | 0.8321471  | 0.1307549  | 0          | 1.0662110        |
| 0.06026322   | 0.02986377 | 0.2532948  | 0.03914184 | 0.6843322  | 0.9215107        |
| 0.09939253   | 0          | 0.03468051 | 0.06876946 | 0.6550391  | 0                |
| 0.7554941    | 0.2094343  | 0.1860743  | 0.2836308  | 0.2041321  | 0.03003061       |
| 0.09627724   | 0.3527217  | 0.02083519 | 0.2060887  | 0.4010127  | 0.3665099        |
| 0.3356905    | 0.3090521  | 0.09162749 | 0.7866555  | 0          | 0.1300519        |
| 0.3741271    | 0.04757061 | 0          | 0.09159496 | 0.08404658 | 0.2463158        |
| 0.1722559    | 0.2860565  | 0.6076795  | 0.1648358  | 0.1756055  | 0.09353743       |
| 0.8723365    | 0.2835418  | 0.1158092  | 0.04924103 | 0.6033701  | 0.08608419       |
| 0.1565674    | 0.5841760  | 0.3795703  | 0.2415070  | 0.4270241  | 0.1411299        |
| 0.1181424    | 0.2579144  | 0.1474979  | 0.02565453 | 0.1653776  | 0.2020857        |
| 0.09446449   | 0          | 0.3039856  | 0.2128903  | 0.03231751 | 0.04647388       |
| 0.4067930    | 0.8063219  | 0.3818646  | 0.0636989  | 0.2718484  | 0.08964112       |
| 0.1179572    | 0.7452099  | 0.06108499 | 0.1125755  | 0.04243799 | 0.1782583        |
| 0.2362061    | 0.02323694 | 0.1430283  | 0.1107078  | 0.09180135 | 0.2835984        |
| 0.7796318    | 0.04406131 | 0.08793041 | 0.02916173 | 0.2254013  | 0                |
| 0.1834635    | 0          | 0.5255901  | 0.4747238  | 0.4295977  | 0.02075475       |
| 0.9890882    | 0.2070955  | 0.06432969 | 0.3524042  | 0.2241421  | 0                |
| 0.2312788    | 0.08685694 | 0.0699123  | 2.2139890  | 0.02284198 | 0.9449085        |
| 1.9785860    | 1.006737   | 0.1269798  | 0.04785293 | 0.1004762  | 0.04895276       |
| 0.02161721   | 0.2812122  | 0.4177834  | 0.1980162  |            |                  |
| TCGA-2F-A9KR | 3183       | 1          | 0.2371776  | 0.2874512  | 0.1146864        |
| 0.1213268    | 55.4882    | 0          | 0.5401312  | 1.0965320  | 0.1088407        |
| 0.5670668    | 0.9324503  | 0.5568662  | 0.2990632  | 0.04484799 | 0.07486208       |
| 0.8158555    | 0.1377646  | 0.09420669 | 0.1038018  | 0.3249448  | 5.652642         |
| 52.610450    | 0.2256678  | 0.9349246  | 1.2375330  | 0.22705    | 0.6005677        |
| 0.1571579    | 0.1581742  | 0          | 1.2735510  | 0.3285156  | 0.3203027        |
| 0.1606103    | 0.08753719 | 0.08824346 | 0.1216987  | 0.09833856 | 0.5717608        |
| 14.061520    | 0.6019112  | 0.5359648  | 0          | 3.1848280  | 0.2060771        |
| 0.9748345    | 0.1397830  | 1.30233    | 0.6487144  | 0.06200707 | 2.28364          |
| 0.1597712    | 0.1538470  | 0.1323053  | 0.5439785  | 0.2370105  | 0.3669590        |
| 0.05608804   | 0.3474183  | 0.2596403  | 0.1736282  | 1.8068361  | 0.3103290        |
| 0.03689719   | 0.05940263 | 0.1798011  | 0.03473461 | 0.07151895 | 0.7497159        |
| 0.2404417    | 0.4855545  | 1.6688910  | 0.3373914  | 0.1925274  | 0.3016304        |



|              |            |            |            |             |            |            |            |
|--------------|------------|------------|------------|-------------|------------|------------|------------|
| 0.1633602    | 0.2874512  | 0          | 0          | 0.2475960   | 0.02472017 | 0.04517149 | 0.4299955  |
| 0.2445948    | 0          | 0.6877875  | 1.6725     | 0.003716425 | 0          | 0          | 0.7257285  |
| 4.3480353    | 6046930    | 2053223    | 0.2458891  | 9522030     | 2503163    | 1.58016    | 0.1561364  |
| 0.09303399   | 0.07979072 | 4.3662920  | 2095439    | 0.7932026   | 0.0223932  |            |            |
| 0.1065140    | 6047210    | 5086093    | 0.4317257  | 0.8497828   | 0.1724707  | 0.2620173  |            |
| 0.4842326    | 2.2027840  | 1148496    | 0.9583118  | 0.05095726  | 2.1452840  | 0.06672974 |            |
| 1.6756050    | 4934394    | 0.1868433  | 2.2482960  | 4900807     | 0.3896059  | 0.04152073 |            |
| 0.7434601    | 0.2721018  | 1.1996583  | 7600760    | 0.0887968   | 0.03454729 | 0.07853307 |            |
| 0            | 1.1473532  | 6888080    | 2255653    | 0.1787974   | 0.7534225  | 0.2911843  |            |
| 0.6036475    | 0.05633465 | 0.7298037  | 0.04175269 | 0.2677157   | 0.4550933  | 0          |            |
| 0.5730656    | 1.4336822  | 0.03829    | 0.2911243  | 0.1901892   | 1.2314671  | 1.430245   |            |
| 0.1115482    | 0.2453932  | 0.02751067 | 1.5713260  | 1.653480    | 0.4427884  | 0.1830626  |            |
| 0.0730332    | 0.02014483 | 0.09602224 | 0.4105611  | 0.0937170   | 0.6695273  | 0.6875323  |            |
| 0.2034591    | 0.6421151  | 9143240    | 7391602    | 0           | 0.2053850  | 0.07626256 | 0.7181165  |
| 0.1088407    | 0.7182738  | 0          | 0.7075721  | 0.3303606   | 0.2444678  | 0.5101672  |            |
| 0.2874512    | 0.4529534  | 0.5810370  | 1.854760   | 0.6544182   | 0.05619346 | 0.323132   |            |
| 0.03947393   | 0.6128318  | 0.1479947  | 0.04493225 | 0.5169151   | 0.352953   |            |            |
| 0.1211956    | 1.8521851  | 1.843620   | 8856297    | 1.1608810   | 0.06231571 | 0.6560014  |            |
| 0.7688209    | 0.1273931  | 0.1956474  | 0          | 0.2081850   | 0.9926826  | 0.09692158 | 0          |
| 0.2565354    | 0.04254496 | 0.8871695  | 1.1010410  | 0.1956047   | 0          | 0.1424472  |            |
| 0.2607115    | 0.1309569  | 0.2550761  | 0.2648172  | 0.01159917  | 1.842163   |            |            |
| 2.3431980    | 2308488    | 0.1046497  | 0.3587391  | 0.1251881   | 0.03765894 |            |            |
| 0.4863044    | 0.65607    | 0.5640552  | 0.0273763  | 0.6197253   | 0          | 0.1620028  |            |
| 0.6257864    | 0          | 2.2771527  | 1.1576890  | 0.4199113   | 0.05044138 | 0.1330635  |            |
| 0.6984795    | 0.07778384 | 0.06011044 | 1.4135430  | 0.05531999  | 0.1211361  |            |            |
| TCGA-E5-A4U1 | 1181       | 0          | 0.2455104  | 0.2250379   | 0.1907930  | 0.4541862  |            |
| 0.02691284   | 444760     | 0.2804035  | 0.4800520  | 1.207121    | 0.1906158  | 0.1677113  |            |
| 0.3290489    | 9.13404    | 0.5780748  | 0.1896322  | 0           | 0.9953258  | 0          | 0.01044819 |
| 0            | 0          | 4.62461    | 128.148    | 0.09688322  | 0.05655806 | 0          | 0          |
| 0.1161995    | 0          | 0          | 0.4832093  | 0.2312203   | 0.01869676 | 0.6583849  |            |
| 0.6412614    | 0.3365612  | 0.01631138 | 0.07741068 | 1.4314712   | 9.441440   | 176.158    |            |
| 0            | 0.0330235  | 0          | 7.7001970  | 1.828433    | 23.052260  | 1.399626   | 0.4504836  |
| 0            | 8.4710710  | 5.396027   | 0.03282216 | 8.4040210   | 4.351671   | 0.05906578 | 5.28662    |
| 0.03767681   | 0.01011972 | 0.4817132  | 0.2628614  | 0.5697769   | 0.1132879  |            |            |
| 0.1632897    | 0.1973547  | 0.0650231  | 0.4621584  | 0.1366302   | 1.399424   |            |            |
| 0.3315559    | 0.5183403  | 0.01464038 | 0.1994121  | 0           | 0.07931959 | 0.4936961  |            |
| 0            | 0.1583866  | 0          | 0.06803473 | 0.3172394   | 0          | 0.04529452 | 0.06376075 |
| 0.3161020    | 1.6724020  | 0.02147074 | 0.5016693  | 0.04521217  | 0          | 0.06797273 |            |
| 0.4570095    | 0.03709601 | 0          | 0          | 0           | 10.109365  | 9.168340   | 1.366302   |
| 1.8742930    | 2.379588   | 1.1209750  | 0.2063626  | 0.1327403   | 7.01852    | 0.05809975 |            |
| 8.9731220    | 1.0041182  | 6.311230   | 2.350349   | 0.03957144  | 0.2899906  | 0          |            |
| 0.2490821    | 0.1940595  | 0.2035870  | 0.09907049 | 0.6230417   | 0.1130304  |            |            |
| 0.1817499    | 0          | 0.1327403  | 0.5088551  | 0           | 3.1922530  | 6.794178   | 0.2137272  |
| 0.04604943   | 0          | 0          | 0.5505541  | 13.344610   | 1.969639   | 0          | 0          |
|              |            |            |            |             |            | 0          | 0.9013513  |

|                                   |                    |                           |                          |                           |                   |            |
|-----------------------------------|--------------------|---------------------------|--------------------------|---------------------------|-------------------|------------|
| 15.679960.05003359                | 0.2379588          | 0.06099262                | 0                        | 0.4303851                 | 0.06247913        |            |
| 0.1798676                         | 0                  | 0.5938315                 | 1.4358720.8995703        | 0.3177852                 | 0.4416819         |            |
| 2.3413440.2460019                 | 0.1484345          | 0                         | 2.1460940.06185744       | 0.2005378                 | 0                 |            |
| 5.1440040.4034419                 | 0                  | 0.01765473                | 0.2429970                | 0                         | 0.3541543         | 0.2756839  |
| 0.7867528                         | 0.2118117          | 0.1805205                 | 0.3200172                | 10.579250.1639562         |                   |            |
| 0.4017957                         | 0                  | 0.2537418                 | 0                        | 0.4828484                 | 0.9743233         | 0.06978492 |
| 0.6801147                         | 0.4024320          | 0.2321278                 | 0                        | 0.1046578                 | 0.03790654        | 0.03955885 |
| 0.4184771                         | 0                  | 0.30751                   | 0                        | 5.8592580.3282732         | 0.3488314         | 0          |
| 0                                 | 7.0816010.3170616  | 0.09822262                | 0.6437494                | 1.2025581.9228168.1754510 |                   |            |
| 0.1301921                         | 0                  | 0.02931961                | 0.3559480                | 0.1654104                 | 0.2276127         | 0          |
| 0.3279780.9368331                 | 0.1358836          | 0                         | 0                        | 0.5687426                 | 0                 | 0.05350964 |
| 0.02828975                        | 0.09790036         | 0.0771858                 | 0.3496196                | 4.9427650                 | 0.05803195        | 0          |
| 0.0555370.03132483                | 0.6204507          | 0.0181907                 | 0.6568560                | 0.6808351                 | 0                 |            |
| 0.2515417                         | 1.6944620.03522194 | 3.7397176.0870820.1609867 | 0                        | 0                         |                   |            |
| 0.7746633                         | 0.01078347         | 0                         | 5.6537950.03681228       | 0.08549452                |                   |            |
| TCGA-E7-A3Y1                      | 163                | 0                         | 0.3195541                | 0.6346327                 | 0                 | 0.5067126  |
|                                   |                    |                           |                          |                           |                   | 0.02335229 |
| 86.791050.0530160.3539110.4720949 | 0                  | 0.7367931                 | 0.2304188                | 2.284198                  |                   |            |
| 2.1436480.3042561                 | 0.04046289         | 0.07204512                | 0.5924358                | 0.09943554                |                   |            |
| 0.05439709                        | 0.07492192         | 0                         | 4.666245262.775          | 0.0980796                 | 0.06543597        | 0          |
| 0.1638798                         | 0.09632818         | 3.41277                   | 0                        | 0.07611116                | 0.0326932         | 0.9676015  |
| 0.2553552                         | 0.2595791          | 0.5712987                 | 0.2936767                | 0.3088920.007076915       |                   |            |
| 0.04478092                        | 0.1537871          | 0.4716396                 | 0.07039971               | 41.493530.09654368        |                   |            |
| 0.1146216                         | 0.02834174         | 1.0420960.7536264         | 11.659860.2833821.368139 |                           |                   |            |
| 0.2017847                         | 0                  | 2.5179410.7413612         | 0.06509872               | 1.94797                   | 0                 | 0.153759   |
| 1.4611540                         | 0.0241482          | 0.4869854                 | 0.5930395                | 0.4944111                 | 0.2457575         |            |
| 0.01349438                        | 0.3914288          | 0.3465943                 | 0.1782345                | 1.69932812.189890.1150801 |                   |            |
| 0.02367253                        | 0.03175966         | 0.3114637                 | 0.06685519               | 0.2408973                 | 0.06764111        |            |
| 0.1156971                         | 0.2748728          | 0                         | 0.3246958                | 0.2011642                 | 0                 | 0.4716396  |
| 0.5532696                         | 0                  | 0                         | 0.1412025                | 0.09515992                | 0.02173587        | 1.1608330  |
| 0.3047394                         | 1.2829870.01072974 | 0                         | 0                        | 0.4043486                 | 10.183782.636481  |            |
| 0.03951925                        | 0.1432274          | 0.3785529                 | 0.2064834                | 1.2330010.1803135         | 0                 |            |
| 0.03839415                        | 3.06691            | 0.1008295                 | 0.5089036                | 0.01077529                | 0.0512530.4476662 |            |
| 0.4894710.1236141.5097970         | 0.07204512         | 0.3524458                 | 1.0094740.1350897        |                           |                   |            |
| 0.3021170                         | 0.9844889          | 0.03210939                | 0.3455474                | 0.04165543                | 0                 | 1.224509   |
| 0.2947748                         | 0.4192940          | 0.3012567                 | 0.2094904                | 1.0748952.4660010         | 0                 | 0          |
| 0                                 | 0.5060824          | 5.00832                   | 0.1736621                | 0                         | 0.2434549         | 0.1681365  |
| 0.1626446                         | 0.07803802         | 0.1607264                 | 0.7085153                | 1.87647                   | 0                 | 0.1723443  |
| 1.1497791.6113080.6982006         | 0.3931812          | 1.6755271.2549770.1610262 |                          |                           |                   |            |
| 0.07457666                        | 0.05295095         | 1.3870510.1591262         | 0.0387388                | 0.0153195                 |                   |            |
| 0.02811402                        | 0.3101889          | 0.04620452                | 0.2853588                | 0.3349060.3221669         |                   |            |
| 0.3308307                         | 0.8223734          | 0.3207098                 | 2.1892970.0474231        | 0                         | 0.03294277        |            |
| 0.1467858                         | 0.5375181          | 0.1571178                 | 0.6433906                | 0                         | 0.9476514         | 0.3231415  |
| 0.3529032                         | 0.3524915          | 0.03951925                | 0.01816289               | 0.2960329                 | 0.4187809         |            |
| 0.6354671                         | 0.05407898         | 0.1986215                 | 0.03798858               | 0.2033696                 | 0                 | 1.902626   |

|              |             |            |            |             |            |            |
|--------------|-------------|------------|------------|-------------|------------|------------|
| 0.3109152    | 0.3155421   | 0          | 2.9082730  | 0.8253693   | 0.4403574  | 0.6495338  |
| 0.04797668   | 0.3382055   | 0.8224541  | 0.1225995  | 0.3765709   | 0          | 0.1908107  |
| 0.3878781    | 0.2176406   | 0.04784371 | 0          | 0           | 0.5346946  | 0.5873670  |
| 0.1411833    | 0.03901901  | 0.1096697  | 0.08363377 | 0.2586914   | 0.07364339 | 0          |
| 0            | 0.009480454 | 2.7414050  | 0.1110811  | 0.1384788   | 0.1150801  | 0.09638197 |
| 0.3941305    | 0.3765156   | 0.9944282  | 0.05428305 | 0           | 0.7370676  | 0.1162164  |
| 0.2494510    | 0.2984066   | 0.09168915 | 2.3178975  | 6.546190    | 0.4939130  | 0.06402823 |
| 0.2016590    | 0.09357117  | 0.05784856 | 2.3878530  | 0.005323837 | 0.1165779  |            |
| TCGA-FD-A6TC | 187         | 0          | 0.09550303 | 0.2772078   | 0          | 0.3281153  |
| 52.759970    | 0.04753362  | 0.07932828 | 0.3236813  | 0.09391352  | 0.04044499 |            |
| 1.2748860    | 0.1828562   | 0.5057826  | 0.08110062 | 0.1838117   | 0.1291899  |            |
| 0.1599916    | 0.1485882   | 0.0325146  | 0.1119571  | 0.2243036   | 2.713091   |            |
| 33.385620    | 0.2009993   | 0.1466731  | 0.06281229 | 0.09795537  | 0.6909352  |            |
| 1.0067910    | 0.6780205   | 0.06824051 | 0.1172496  | 0.5494432   | 0.1417303  |            |
| 0.1163680    | 0.7092288   | 0.1940162  | 0.09063804 | 0.03807055  | 0.1111850  | 0.07424523 |
| 0.1761948    | 0.03155985  | 1.9993020  | 0.04328006 | 0.1027686   | 0.1185843  |            |
| 0.8244113    | 0.2133773   | 0.0835880  | 0.07259357 | 0.8411385   | 0.2050406  | 0          |
| 0.3543257    | 0.1399362   | 0.07174261 | 0.7165254  | 0           | 0.09190587 | 0.8530601  |
| 0            | 0.1633669   | 0.1309879  | 0.1227031  | 0.4116210   | 0.3525501  | 0.02419786 |
| 0.1608526    | 0.08672179  | 0.2796557  | 0.3897583  | 0.5862480   | 0.1031797  |            |
| 0.1167351    | 0.06264588  | 0.1085993  | 0.1198834  | 0.06171032  | 0.3638781  |            |
| 0.1555993    | 0.3696723   | 0.1669574  | 0.02646537 | 0.1091664   | 0.08675419 | 0          |
| 0.6448728    | 0.0676440   | 0.0949506  | 0          | 0.04454439  | 0.3469303  | 0.2462242  |
| 0.05465024   | 0.3907430   | 0.7320178  | 0.2148507  | 0           | 0          | 0.7909854  |
| 0.3421351    | 0.2834606   | 0.2568325  | 0.4274011  | 0.1542758   | 0.7492808  |            |
| 0.1347227    | 0.04013731  | 0          | 2.2800510  | 0.1356041   | 0.1825112  | 0.0579661  |
| 0.2408239    | 0.5119973   | 0.8928061  | 0.5076259  | 0.1488168   | 0          | 0.101822   |
| 1.6404660    | 0.04404368  | 0.7698556  | 0.4836546  | 0.8655436   | 0.02878897 |            |
| 0.9294431    | 0.3884176   | 0.1074788  | 0.6608614  | 1.0571690   | 0.2421888  |            |
| 0.03582627   | 0.1012889   | 0          | 0.5354110  | 0.6128295   | 0.1149278  | 0.05961844 |
| 0.03388124   | 0           | 0.6187479  | 0.1871004  | 0.1557037   | 0.2159861  | 0.3511449  |
| 0.9044970    | 0.1488168   | 0.04860851 | 0.06996812 | 0.03602642  | 0.5197483  |            |
| 0.3825230    | 0.4499113   | 0.09271335 | 0.5154401  | 0.3768737   | 0.3867642  |            |
| 1.1912830    | 0.1099215   | 0.3992646  | 0.04812484 | 0.18945     | 0.0474753  | 0.243113   |
| 0.1426710    | 0.06946566  | 0.1030148  | 0.7688061  | 0.2259662   | 0          | 0.1869672  |
| 1.1581970    | 0.7565163   | 0.3954927  | 0.3511104  | 0.1087061   | 1.4594490  | 0.2551145  |
| 0.03473283   | 0.2362893   | 0.1974101  | 0.3098144  | 0.1408703   | 0.4147654  |            |
| 0.03619492   | 0.5342142   | 0.3458014  | 0.7382890  | 0.1241587   | 0          | 0.439686   |
| 0.3244025    | 0.05539792  | 0.4069668  | 0.1939467  | 0.07554996  | 0          | 1.2216720  |
| 0.07753982   | 0.3345162   | 0.5575030  | 0.6274438  | 0.5046831   | 0.4581064  |            |
| 0.06368066   | 0.4076559   | 0.07527699 | 0.1415081  | 0.8142765   | 0.0366405  |            |
| 0.1350519    | 0           | 0.1026474  | 0.5796127  | 0.0557527   | 0.0857924  | 0          |
| 0.7036382    | 0.8152193   | 0.1057169  | 0.02109726 | 0           | 0.02458219 | 0          |
| 0.1011021    | 0.08803725  | 0.07616608 | 0.1100921  | 0.2465024   | 1.466821   |            |

|                   |                           |             |            |            |             |                   |                       |
|-------------------|---------------------------|-------------|------------|------------|-------------|-------------------|-----------------------|
| 0.0746957         | 0.07901009                | 0.5158983   | 0.07561323 | 0.06905    | 0.5047928   |                   |                       |
| 0.3821119         | 0.02433482                | 0.02362172  | 0.2471872  | 0.06946566 | 0.08387075  |                   |                       |
| 0.4134840.3836354 | 1.5114215.9110140.0715697 | 0.8051843   | 0.05740708 |            |             |                   |                       |
| 0.1808055         | 0                         | 0           | 0.09082716 | 0          | 0.1045226   |                   |                       |
| TCGA-FD-A5BV      | 163                       | 1           | 0.17851164 | 0.11931067 | 0           | 0.2270405         | 0 47.94846239         |
| 0                 | 0.29192281                | 0.20361125  | 0          | 0          | 0.73356698  | 0.11962642        | 2.39893981            |
| 0.32557626        | 0.15822572                | 0.36976348  | 0.70127676 | 0.29162386 | 0.10635694  | 0                 |                       |
| 0                 | 3.15151284                | 71.47370738 | 0.26710094 | 0.02398877 | 0.41092453  | 0                 |                       |
| 0.14125531        | 0.61345162                | 0           | 0          | 0          | 0.33107373  | 0.22288806        | 0.02379037 0          |
| 0.19265767        | 0.16471207                | 0.18679613  | 0.12880752 | 0.12143    | 0.11526845  |                   |                       |
| 0.05161695        | 5.96277724                | 0.14157132  | 0          | 0.06926705 | 0.62922819  | 1.163279          |                       |
| 6.26389565        | 0.1780931.26106188        | 0.09863213  | 0          | 0.66229595 | 0.05721734  |                   |                       |
| 0.02187637        | 0.73243493                | 0           | 0.45094331 | 0.54811508 | 0           | 0.03863           | 0.43441918            |
| 0.26757876        | 0.51785907                | 0           | 0.01978811 | 0.40657612 | 0.08273751  | 0.31036788        |                       |
| 0.34770537        | 15.40966993               | 0.29531776  | 0.15620993 | 0.08383006 | 0.10149539  |                   |                       |
| 0.07352716        | 0.15139325                | 0.59513208  | 0.42414462 | 0.16122899 | 0           | 0.0432848         |                       |
| 0.1940701         | 0                         | 0           | 0          | 0.06703642 | 0.05176473  | 0                 | 0.05008679            |
| 0.29946829        | 0.23011774                | 0           | 0.99944834 | 1.40247432 | 0.04720217  | 0                 | 0                     |
| 0.05390322        | 2.14391233                | 0.55957086  | 0.0579509  | 0.11871153 | 0.02055958  |                   |                       |
| 0.10092883        | 0.92412361                | 0.08813702  | 0          | 0.1126021  | 4.73737578  | 0.07392801        |                       |
| 0.59700356        | 0.03950211                | 0.07515722  | 0.6564562  | 0.35887927 | 0.27693593  |                   |                       |
| 0.46124182        | 0.12169688                | 0           | 0.18950258 | 1.79485107 | 0.05402593  | 1.60887401        |                       |
| 0.50338255        | 1.55577939                | 0.28251062  | 0.39410734 | 0.25655018 | 0.08789219  |                   |                       |
| 2.1965784         | 1.12386737                | 0.14780077  | 0.05859479 | 0.16566068 | 0.153598    |                   |                       |
| 0.64216435        | 0.66819902                | 0           | 0          | 0          | 0.54436454  | 0                 | 0.42841068 0.44565055 |
| 0                 | 0.80713359                | 0.08218491  | 0.3042422  | 0.23850142 | 0.45773872  | 0                 |                       |
| 1.60567227        | 0.37094657                | 0           | 0.20218012 | 0.05620105 | 1.02731133  | 0.82820095        |                       |
| 0.22863567        | 0.23970598                | 0.11872866  | 0          | 0.01822649 | 0.03882355  | 0.2293948         |                       |
| 0.28001052        | 0                         | 0.01123223  | 0.14429207 | 0.02842874 | 0           | 0                 | 1.1926834             |
| 0.52866544        | 0.21561287                | 0.11485005  | 0.10896911 | 1.56355583 | 0.48678752  |                   |                       |
| 0.51125799        | 0                         | 0.21524618  | 0.22520419 | 0          | 0.95126295  | 0                 | 0.26211636            |
| 0.48149635        | 0.34499739                | 0.23998568  | 0.0579509  | 0.45277796 | 0.19293408  |                   |                       |
| 0.01006719        | 0.22464163                | 0           | 0.16180989 | 0          | 0.38768657  | 0.20885273        | 0                     |
| 1.27658976        | 0.44910075                | 0.05701115  | 0.20635558 | 1.72902672 | 0.10415138  |                   |                       |
| 0.30479171        | 0.10552926                | 0           | 2.02093834 | 0.23970598 | 0.2208809   | 0                 |                       |
| 0.02331701        | 0.63198114                | 0.04559249  | 0          | 0.28962187 | 0           | 0.48056162        |                       |
| 0.6098095         | 0.17290267                | 0.06901023  | 0          | 0          | 0           | 0.08754095        | 0 0 0                 |
| 0.06951052        | 1.03741603                | 0           | 0.11076262 | 1.01251804 | 0.21200127  | 0.23250926        |                       |
| 0.12384027        | 0.92585776                | 0.03980024  | 0          | 0.43728371 | 0.68167732  | 0                 |                       |
| 2.51411006        | 0                         | 3.39895584  | 5.06937452 | 0.10242235 | 0.42710266  | 0.09389077        |                       |
| 0.09857068        | 0.17837617                | 0           | 0.08488582 | 0.51525252 | 0.18649031  |                   |                       |
| TCGA-DK-A2I4      | 3835                      | 0           | 0.09221628 | 0.06574293 | 0           | 0.1232090.1257938 |                       |
| 25.890840.1784912 | 0.2308584                 | 0.2056899   | 0.5642403  | 0          | 1.34125     |                   |                       |
| 0.1098615         | 0.3988404                 | 0.1384259   | 0.1998013  | 0.2183016  | 0.009612429 |                   |                       |

|              |            |            |             |            |            |            |
|--------------|------------|------------|-------------|------------|------------|------------|
| 1.004322     | 0.0305235  | 0.4035885  | 0.04211358  | 1.60689330 | 1.82770    | 1.651044   |
| 0.2974132    | 0.2830361  | 0.03678275 | 0.4540371   | 0.6523308  | 1.289975   |            |
| 0.0768740    | 0.4843062  | 0.4995087  | 0.2169757   | 0.0873936  | 0.2663191  |            |
| 0.09366954   | 0.1966470  | 0.1191308  | 0.1217724   | 0.1194834  | 0.2381834  |            |
| 0.09480709   | 1.1187620  | 0.06500755 | 0.05788521  | 0.1335871  | 0.3302088  |            |
| 0.4006212    | 0.0724950  | 0.1635556  | 0.6843457   | 0.3894981  | 0          | 0.3497345  |
| 0.08675504   | 0.5044856  | 0          | 0.03451113  | 0.1144030  | 0.1093865  | 0.0901755  |
| 0.1228684    | 0.4042491  | 1.0259790  | 0.02725926  | 0.16473    | 0.2279514  | 0.3825444  |
| 1.19746      | 1.4151810  | 0.07748899 | 0.1673686   | 0.0598789  | 0.0932105  | 0.1800674  |
| 0.09269019   | 0.4858244  | 0.07790449 | 0.3516618   | 0          | 0.3378881  | 0.1318891  |
| 0.0651533    | 0.1587889  | 0.2607803  | 0.2032054   | 0          | 0.08319371 | 0.0320379  |
| 0.09408741   | 0.4089161  | 0.07925011 | 0.0820858   | 0.5361568  | 0.7853614  |            |
| 0.03130771   | 0          | 0.03158519 | 0.7672995   | 0.4413071  | 0.3270235  | 0.1862716  |
| 0.1509526    | 0.1699320  | 0.06951764 | 0.8117895   | 0.06070691 | 0          | 0.2326738  |
| 0.7863546    | 0          | 0.7538729  | 0.05804419  | 0.1035334  | 0.09043062 | 0.1098615  |
| 1.44737      | 0.2965140  | 0          | 0.07119565  | 0.9261294  | 0.04134658 | 0.7601859  |
| 0.09906264   | 1.38695    | 0.1297249  | 1.4736011   | 0.6941370  | 0.04035885 | 0.5043189  |
| 0.1587889    | 0.1710274  | 0.0538118  | 0.2535635   | 0.03526502 | 0.348486   |            |
| 0.7309715    | 0.02877067 | 0.06716111 | 0.1781161   | 0.03124556 | 0.2788117  |            |
| 0.1686173    | 0.02923378 | 0.02317255 | 0.4312072   | 0.03773815 | 0.5588149  |            |
| 0.1095165    | 0.1050936  | 0.05411243 | 1.5613451   | 0.0830150  | 0.01877156 | 0.09283825 |
| 0.2064538    | 0.3302088  | 0.1467292  | 0.2967003   | 0.3852436  | 1.144889   |            |
| 0.1084268    | 0.1004322  | 0          | 0.3300492   | 0.1071474  | 0.1565083  | 0.1340997  |
| 0.1041179    | 3.0024370  | 0.0622235  | 0.07390227  | 0.3543704  | 0.2737458  |            |
| 0.1485096    | 0.1318438  | 0.1106083  | 0.2931327   | 0.1915937  | 0.02608472 |            |
| 0.08872786   | 2.1744360  | 0.1034106  | 0.3526502   | 0.3687793  | 0.1087310  | 0.3419756  |
| 0.6457416    | 0.3960448  | 0.1441051  | 0.02661023  | 0.3913586  | 0.3322223  |            |
| 0.1294360    | 0.2712522  | 0.0364140  | 0.1458998   | 0          | 0.05477544 | 0.04795111 |
| 0.1455830    | 0.9586139  | 0.4450381  | 0.1579259   | 0.5292964  | 0.1530395  |            |
| 0.6910330    | 0.06461006 | 0.1214561  | 0.2480332   | 0.1926218  | 0.07606904 |            |
| 0.1529388    | 0.4111428  | 0.1837913  | 0.08374171  | 0.03221549 | 0.2659805  |            |
| 0.1378481    | 0.4761764  | 0.8827620  | 0.03969723  | 0.1109098  | 0.02627339 |            |
| 0.01846148   | 0.2252587  | 0.02233198 | 0.04958767  | 0          | 0.1503278  | 0.0510692  |
| 1.0420520    | 0.01869908 | 0.06781417 | 1.12359     | 0.1541343  | 0.06405898 | 0.3980599  |
| 0.2763415    | 0          | 0.01774015 | 0.1894288   | 0.1304236  | 0.0629878  | 0.5553021  |
| 0.3292733    | 0.4824144  | 5.3565020  | 0.08062439  | 0.6047018  | 0.08622663 |            |
| 0.2263113    | 0.2961283  | 0          | 0.2143810   | 0.01075439 | 0.1712674  |            |
| TCGA-UY-A78M | 690        | 1          | 0.07234781  | 0.0928409  | 0.1049506  | 0.1338411  |
| 0.1332327    | 126.75690  | 0.1577486  | 0.1584389   | 0          | 0.2144722  | 0.5621721  |
| 0.07757217   | 1.2873940  | 0.03909649 | 0.3847576   | 0.1370140  | 0.1968301  | 0.09455226 |
| 0.04310471   | 0          | 0.2378883  | 0.943349109 | 0.08190    | 0.01332327 | 0.07777801 |
| 0            | 0.2747925  | 5.0875870  | 0.5273277   | 0.03618667 | 0          | 0.5213801  |
| 0            | 0.08357572 | 0.1763711  | 0.1495314   | 0.07402304 | 0.06223483 | 0.4049574  |
| 1.08382      | 0.1004136  | 15.570280  | 0.1836048   | 0.3542257  | 0.1167828  | 1.340654   |

|              |            |             |             |             |            |            |            |          |
|--------------|------------|-------------|-------------|-------------|------------|------------|------------|----------|
| 0.03771662   | 5.8902890  | 0.7434      | 0.07675002  | 0           | 0.7730426  | 0.07420557 |            |          |
| 0.04900553   | 4.84449    | 0           | 0           | 0.7754774   | 0          | 0.08767416 | 0.1543565  |          |
| 0.1735124    | 0.1679038  | 0.1402130   | 0.006415835 | 0.2326286   | 0.03832245 |            |            |          |
| 0.1482962    | 0.1127354  | 4.8407890   | 0.05471424  | 0.1012949   | 0.03019994 |            |            |          |
| 0.09872257   | 0.04767895 | 0.09817148  | 0.4931142   | 0.1100152   | 0.3397859  |            |            |          |
| 0.02213359   | 0.02806818 | 0.05033817  | 0.09200825  | 0           | 0.1052197  | 0          | 0          |          |
| 0.1007011    | 0          | 0.008857896 | 0.2555148   | 0.07461033  | 0          | 0.3552063  |            |          |
| 0.5767177    | 0.09182524 | 0.3266226   | 0           | 0.1048612   | 2.1093111  | 1.880252   |            |          |
| 0.03757846   | 0.01776436 | 1.0932180   | 0.06544766  | 0.8597952   | 0          | 0          | 0          |          |
| 5.4901050    | 0.09587776 | 0.5323025   | 0.01024611  | 0.04873596  | 0.6810901  |            |            |          |
| 0.3878609    | 0.4701733  | 0           | 0.07891477  | 0           | 0.05957993 | 1.52384    | 0          | 0.2268   |
| 0.04663145   | 0.6498452  | 0           | 0.3650861   | 0.2535023   | 0          | 2.1478730  | 1.68179    |          |
| 0.1686818    | 0.0379960  | 1.790387    | 0           | 0           | 1.4910480  | 1.625175   | 0.1580727  |          |
| 0.07186634   | 0          | 0.04374806  | 3.6114570   | 0           | 0.1107168  | 0          | 0.1578295  | 0        |
| 0.1113084    | 0          | 0.9187092   | 0.2154104   | 0.02650884  | 0.1638805  | 0.03644377 |            |          |
| 0.5995473    | 0.3805865  | 0.5027934   | 0.07771909  | 0.5389301   | 0.255197   |            |            |          |
| 0.0354571    | 0.07552579 | 1.2792660   | 0.0605246   | 0.07367267  | 0.1383880  | 0.02673334 |            |          |
| 0.1474777    | 0.04393542 | 0.1043634   | 0.0454941   | 0.5689270   | 0.06990746 |            |            |          |
| 0.03723746   | 0.2008271  | 1.3858540   | 0           | 0           | 0.2093657  | 0.07301722 |            |          |
| 0.3984047    | 0.7735903  | 0           | 0.2886797   | 0.17346     | 0.7670221  | 0.1316781  |            |          |
| 0.1503138    | 0.5353982  | 0.06255439  | 0.02611243  | 0.1834359   | 0          | 0.0972952  |            |          |
| 0            | 0.2513967  | 0.1354313   | 0           | 0.4139046   | 0.2523915  | 0.03696908 |            |          |
| 1.1597040    | 0.1494925  | 0.1755970   | 0.3088176   | 0.1254565   | 0          | 0.1932512  | 0          |          |
| 0.1790387    | 0          | 0.1270080   | 0.2049052   | 0           | 0.0454941  | 0          | 0.07786657 |          |
| 0.1148081    | 0.3596877  | 0.1121193   | 0.02237496  | 0           | 0.1042838  | 0          |            |          |
| 0.05676623   | 0.1633958  | 0           | 0.02122901  | 0.3335501   | 0.2943133  | 0.02640649 |            |          |
| 0.01197074   | 0.2735712  | 0.1145608   | 0.07323185  | 0.1104189   | 0.09005636 |            |            |          |
| 0.1032344    | 0.05010462 | 0.2835582   | 0.03683634  | 0           | 0.4385256  | 0.0290621  |            |          |
| 1.2823651    | 5.641950   | 0.04269608  | 0.2769562   | 0.1217676   | 0.1917555  | 0          | 0          |          |
| 0.8944732    | 0          | 0.1007752   |             |             |            |            |            |          |
| TCGA-4Z-AA7R | 522        | 1           | 0.1520827   | 0.3090055   | 0.1103086  | 0.2813481  |            |          |
| 0.0233391    | 23.344010  | 0.1547487   | 0.2775461   | 0.1046861   | 0.04508431 |            |            |          |
| 0.2787706    | 0.5707271  | 0.9584591   | 0.2794288   | 0.2480323   | 0          | 0.6420376  |            |          |
| 0.5300235    | 0.0724885  | 0.07487962  | 0           | 2.67032143  | 1.48480    | 1.680415   | 0          |          |
| 0.2100519    | 0.1091915  | 0           | 0.9682393   | 0.05038628  | 0.3423068  | 0.03267474 |            |          |
| 0.9025848    | 0.4921927  | 0.0972872   | 0.3513699   | 0.3398548   | 0.2469741  |            |            |          |
| 0.07072919   | 0.06541208 | 0.1655234   | 0.3142489   | 0.03517998  | 8.084268   |            |            |          |
| 0.1447338    | 0.2291137  | 0           | 0.4288560   | 0.3171372   | 1.7863630  | 0.3641425  |            |          |
| 0.6250820    | 1.882261   | 0           | 0.5078178   | 0.1559879   | 0.02168732 | 1.247994   |            |          |
| 0.05391332   | 0.6659128  | 0.7471453   | 0           | 0.002194051 | 0.1906283  | 0.136778   |            |          |
| 0.4588368    | 0.6877326  | 0           | 0.1548531   | 0.06444626  | 0.1558671  | 1.105914   |            |          |
| 3.8276130    | 2.012764   | 0.04731833  | 0           | 0.2075252   | 0          | 0          | 1.1717840  | 1.734477 |
| 0.1648305    | 0.32569    | 0.2360091   | 0.07936211  | 0.2901165   | 0.07856222 |            |            |          |
| 0.3317743    | 0          | 0           | 0.1234825   | 0           | 0.01241349 | 0.4189529  | 0.03920969 | 0        |

|              |            |             |            |            |            |             |                 |
|--------------|------------|-------------|------------|------------|------------|-------------|-----------------|
| 0.3438663    | 1.5853430  | 0.04289474  | 0.09362661 | 0          | 0.2571675  | 2.317769    |                 |
| 0.9361156    | 0.03949694 | 0.2116079   | 0.5044522  | 0.3095502  | 1.944303   |             |                 |
| 0.3003528    | 0          | 0.2686073   | 2.0943570  | 1.007726   | 0.2543081  | 0.005384602 | 0               |
| 0.4026721    | 0.3261298  | 0.1750211   | 1.4460720  | 0.08294358 | 0.03600222 | 0.5870779   |                 |
| 3.8212250    | 0.0736437  | 0.8581635   | 0.2940727  | 1.0890130  | 0.09627379 | 0.3453523   |                 |
| 0.3497081    | 0.05990369 | 1.1762910   | 1.178433   | 0.09670551 | 0.1198074  |             |                 |
| 0.1881791    | 0.1046861  | 0.9151339   | 1.9288250  | 0.2562217  | 0          | 0           | 0               |
| 0.3218706    | 1.4599350  | 0.04339101  | 0.03439447 | 0.5025034  | 0          | 0.08294358  |                 |
| 0.05418425   | 0.3509728  | 0.0401589   | 3.0255841  | 1.3697660  | 0.2507596  | 0.3444941   |                 |
| 0.6128691    | 1.82045    | 0.3555702   | 0.0813019  | 0.7351817  | 0.4046028  | 0           |                 |
| 0.1366467    | 0.05292105 | 0.3543843   | 0          | 0.1548677  | 0.06124339 | 0           |                 |
| 0.1356310    | 1.385353   | 0.1425988   | 0.5738003  | 0.3603166  | 0.4408585  |             |                 |
| 0.3913853    | 0.1250844  | 1.3872430   | 0.3317743  | 0          | 0          | 0           | 0.4604697       |
| 0.2617152    | 0.6961701  | 0.0605201   | 0.7769757  | 0.5365287  | 0.117568   |             |                 |
| 0.2893831    | 0.3554725  | 0.1633737   | 0.3287398  | 0.1509504  | 0.3459072  |             |                 |
| 0.05404845   | 0.1343447  | 0           | 0.5487878  | 0.07117271 | 0          | 0.3107396   |                 |
| 0.1892184    | 0.1942823  | 0.7969796   | 1.0998710  | 0.2129559  | 1.5320340  | 0.179811    |                 |
| 0.06760291   | 0.4125817  | 0.08168686  | 0.07527166 | 0          | 0.1144218  | 0.2943337   |                 |
| 0.3728875    | 0.1434501  | 0.1973943   | 0.08184186 | 1.3187431  | 0.6319580  |             |                 |
| 0.8701387    | 0          | 0.4110292   | 0.08358655 | 0.2916921  | 0.3925430  | 0.08490287  | 0               |
| 0.7295828    | 2.7398570  | 0.02775461  | 0.1761462  | 0.2300302  | 0.1444913  |             |                 |
| 0.07697052   | 0.1793594  | 1.8299770   | 0.1627572  | 0.1053252  | 0.93909    | 0.2710185   |                 |
| 0.06232754   | 1.1170370  | 1.221832    | 2.02175    | 5.07344    | 0.3241032  | 0.3638695   |                 |
| 0.06399208   | 0.3359086  | 0.009351834 | 0.02890795 | 0.1735640  | 0.05320831 |             |                 |
| 0.3283523    |            |             |            |            |            |             |                 |
| TCGA-E7-A519 | 508        | 0           | 0          | 0          | 0.08116588 | 0.08280719  | 0.1030385       |
| 0.01626646   | 1.9605160  | 0           | 0.4905078  | 0          | 2.4061170  | 0.01209446  | 0.05951217      |
| 0            | 0.01049813 | 0           | 0.1600127  | 0.03673132 | 0          | 2.240476183 | 1.7820.01030385 |
| 0.09624217   | 0.1030385  | 0           | 0          | 5.3432820  | 0          | 0           | 0.04743775      |
| 0            | 0.6463515  | 0.06820027  | 0.4047520  | 0.03122584 | 0.02279875 | 0.01739904  | 0               |
| 0.1553141    | 33.954470  | 0.07099744  | 0.1685836  | 0          | 1.0819040  | 0.05833797  |                 |
| 10.486880    | 0.05954195 | 0.22997     | 0.03957089 | 0          | 2.6903240  | 0.05738853  | 0.0359048       |
| 2.5711920    | 0          | 0.2498886   | 0          | 0.03228798 | 0.04775002 | 0.1341897   |                 |
| 0.1038817    | 0.1445825  | 0.009923658 | 0.1559207  | 0          | 0.0655361  | 0.05812428  |                 |
| 1.3738470    | 0.05222577 | 0.02802696  | 0.1272488  | 0.02458238 | 0.1012308  |             |                 |
| 0.03316182   | 0          | 0.2425671   | 0          | 0          | 0.1245765  | 0           | 0.05780666      |
| 0.1344740    | 0          | 0.009133935 | 0.04742594 | 0.05770156 | 0.3585973  | 0.057833    |                 |
| 0.4803265    | 0          | 0.09185487  | 0          | 0          | 5.7836381  | 4.286240    | 0.5812428       |
| 1.5672030    | 0.1007488  | 0           | 0          | 0          | 6.0197     | 0           | 1.2724280       |
| 0.05999217   | 0.1666587  | 0.1850487   | 0          | 0          | 0.0345581  | 0.1484718   |                 |
| 0.01806253   | 0.04677356 | 0.1442539   | 1.3214490  | 0.0564695  | 0.2818242  | 0           |                 |
| 1.7310470    | 0.08894579 | 0           | 0          | 0.07702878 | 0.2342132  | 0.6413690   | 0               |
| 0.2030012    | 3.0692320  | 0           | 0.06227296 | 0.1648616  | 0          | 0.2392150   | 1.721656        |
| 0            | 0.1894678  | 0.5608612   | 0.2870168  | 0          | 0.1127384  | 0.1030385   |                 |

|              |            |            |            |             |            |            |           |
|--------------|------------|------------|------------|-------------|------------|------------|-----------|
| 0.03924467   | 0.3290240  | 0.2381678  | 0          | 0           | 0.1168191  | 1.3804870  | 0.0936161 |
| 0            | 0.01126583 | 0.0826993  | 0          | 0           | 0.0322847  | 0          | 0.5302472 |
| 0.07478089   | 3.0065550  | 0.6267404  | 0          | 0.1079451   | 0          | 0.1540576  |           |
| 0.2424375    | 0.08906227 | 0.1710940  | 0.05365966 | 0.3954624   | 0.1851567  |            |           |
| 0.05812428   | 0.5342737  | 0.09675566 | 0          | 0.05841467  | 0          | 0.0295080  |           |
| 0.1495563    | 0.4189552  | 0.06359891 | 0          | 0.1883677   | 0          | 0.6899099  | 0         |
| 0.0626778    | 0.1337453  | 0          | 0.03316182 | 2.07836     | 0.1803174  | 0          | 0         |
| 0.07483769   | 0.2218552  | 0          | 0          | 0.5809768   | 0.1806595  | 0.3932101  |           |
| 0.1796891    | 0.17342    | 0          | 0          | 0.2016255   | 0          | 0.01951175 | 0         |
| 0.3901950    | 0.08168818 | 0          | 0          | 0.1063178   | 0.04664098 | 0.1138599  | 0         |
| 0.3991932    | 0          | 0.03310129 | 0          | 0           | 0.6942468  | 0          | 3.8430142 |
| 0.01467554   | 0.3212854  | 0          | 0          | 0.1376230   | 0.6811183  | 0.06264171 |           |
| 0.04676207   |            |            |            |             |            |            |           |
| TCGA-DK-A3IU | 706        | 1          | 0.04429458 | 0.1302615   | 0.08031932 | 0.1434012  |           |
| 0.9176743    | 50.467590  | 0.1157427  | 0.20121    | 0.1818814   | 0.07622538 | 0.02188492 |           |
| 1.9724560    | 0.2077826  | 0.2463126  | 0.07180988 | 0.3454966   | 0.1835008  |            |           |
| 0.1246637    | 0.5306504  | 0.01979298 | 0.1635670  | 0.8958517   | 25.60564   |            |           |
| 0.02039276   | 0.1666672  | 0.3568734  | 0.1192589  | 2.8741050   | 0.4005721  |            |           |
| 0.6236946    | 0.05538775 | 0.1427493  | 0.2816579  | 0.4203242   | 0.03541901 |            |           |
| 0.5436686    | 0.1181057  | 0.2247875  | 0.07725038 | 0.1027777   | 0.04304394 |            |           |
| 0.02860187   | 0.07684712 | 0.5568237  | 0          | 0.08341263  | 0.1581243  | 0.267655   |           |
| 0.1731885    | 2.8268130  | 0.08838139 | 1.0240710  | 0.2447386   | 0          | 0.2218553  | 0         |
| 0.3089164    | 0.1453928  | 0          | 0.1118938  | 0.2225541   | 0.2617071  | 0.5942927  |           |
| 0.05315849   | 0.09959256 | 0.2826951  | 1.0015220  | 0.03437054  | 0.2195729  |            |           |
| 0.9033149    | 0.1053854  | 1.0640840  | 0.5777950  | 0.1046829   | 0.1378162  | 0.4714889  |           |
| 0.05036865   | 0.2189339  | 0.02504374 | 0.1476717  | 0.2104883   | 0.3800588  |            |           |
| 0.1355118    | 0.2792497  | 0.3120453  | 0.1408289  | 0.1430094   | 0.2818384  |            |           |
| 0.05490359   | 0          | 0.01284452 | 0.06924996 | 0.5671765   | 0.2933206  | 1.141995   |           |
| 0.2217857    | 1.5380510  | 0.5262435  | 0.02863032 | 0.1817937   | 0          | 9.202104   |           |
| 0.3668792    | 0.1767154  | 0.2300722  | 0.09516623 | 0.2040601   | 0.07513123 |            |           |
| 0.4287012    | 0.04373935 | 0.1954659  | 0.02794026 | 1.3502340   | 0.2962722  |            |           |
| 0.09801765   | 0.03729793 | 0.09773295 | 0.1187329  | 0.6271975   | 0.2288984  |            |           |
| 0.06039395   | 0.05242881 | 0.06554552 | 1.1753860  | 0.008937068 | 0.3124286  | 0          |           |
| 0.9146708    | 0.1402002  | 11.343750  | 0.2000695  | 0           | 0.6748151  | 0.1716112  |           |
| 0.08508416   | 0.05815714 | 0          | 0.2286761  | 0.2607414   | 0.3803694  | 0.03109392 |           |
| 0.1209740    | 0.2199990  | 0.06753732 | 0.1004420  | 0.1518610   | 0.09478327 | 0          | 0.1232469 |
| 0.1509849    | 0.03945334 | 0.02839499 | 0          | 0.4218563   | 0.9534107  | 0          |           |
| 0.07525125   | 0.2510157  | 0.4588372  | 0.1941768  | 0.8633129   | 0.267655   |            |           |
| 1.6203260    | 0.03618071 | 0.1734010  | 0.1821451  | 0.1621195   | 0.05638215 |            |           |
| 0.2452633    | 0.09206635 | 0.8888167  | 0.1008721  | 0.09584391  | 0.3481691  |            |           |
| 0.4521495    | 0.1337515  | 0.05699611 | 0.1110014  | 0.3535342   | 0.9663032  |            |           |
| 0.08457322   | 0.1438391  | 0.7625170  | 0.2235221  | 0.4954650   | 0.8938543  | 0.1028223  |           |
| 0.2518996    | 0.4854857  | 2.0789820  | 0.07329021 | 0.08627708  | 0.4361785  |            |           |
| 0.2154296    | 0.0349720  | 0.1156108  | 0.03935446 | 0.09928081  | 0          | 0.1479965  |           |



|                   |                     |             |             |              |             |                   |
|-------------------|---------------------|-------------|-------------|--------------|-------------|-------------------|
| 0.1554696         | 0.1888067           | 0           | 0.8361121   | 0.2829266    | 0.06827142  | 0.5434356         |
| 0.07236142        | 0.3403296           | 0.02618526  | 0.1312638   | 2.6621330    | 0.08221166  |                   |
| 0.04132218        | 0.4374              | 0.2090869   | 0.04525195  | 0.03481691   | 0.2874586   |                   |
| 0.08938763        | 0.5585596           | 0.6462889   | 0.3861253   | 0.5308345    | 0.1703699   |                   |
| 0.2194748         | 0                   | 0.06275179  | 0.07145587  | 0.06182058   | 0           | 0.1034870.6757192 |
| 0.08083618        | 0.1099353           | 0.5443508   | 0.1227437   | 0.1087928    | 0.1434012   |                   |
| 0.1263546         | 0.01975148          | 0.03834537  | 0.2047253   | 0.7047768    | 0           | 0.7304373         |
| 0.1112070.5520385 | 5.5832930.03630619  | 0.4769016   | 0.04659474  | 0            |             |                   |
| 0.2519470.1473418 | 0.2000980.007748546 | 0.1156859   |             |              |             |                   |
| TCGA-FD-A3SM      | 547                 | 1           | 0.065124497 | 0.097500114  | 0.04723608  | 0.337338948       |
| 34.88006514       | 0                   | 0.170398531 | 0.142620134 | 0.717254656  | 0.038611792 | 0.986136969       |
| 0.558617993       | 0.26557174          | 0.07038608  | 0.110829698 | 0            | 0.030547978 | 0.794378813       |
| 0.031040853       | 0.021376513         | 0.160602673 | 1.303888952 | 31.002596681 |             | 0.053968755       |
| 0.084015045       | 0.239861135         | 0.233788701 | 0.247356795 | 0.565386961  | 0.215762937 |                   |
| 0.065147469       | 0.279837991         | 0.30368069  | 0.16132672  | 0.111093578  | 0.112847092 |                   |
| 0.191837362       | 0.120180293         | 0.03634498  | 0.10319696  | 0.101257168  | 0.033641726 | 0                 |
| 1.403442811       | 0                   | 0.024527633 | 0.032345547 | 0.367287363  | 0.339509327 | 1.513334397       |
| 0.207909652       | 0.803013365         | 0.126659839 | 0           | 0.086982609  | 0.033398386 | 0.051077909       |
| 0.256518158       | 0                   | 0.350960711 | 0.116342094 | 0            | 0.116501888 | 0.187576189       |
| 0.078094323       | 0.181367994         | 0.631069729 | 0.017325804 | 0.153561891  | 0.103488835 |                   |
| 0.143025096       | 0.744184547         | 1.359213098 | 0.197005946 | 0.010131271  | 0.005436947 |                   |
| 0.236975877       | 0.042918607         | 0.029456631 | 0.308786748 | 0.247577847  | 0.352916702 |                   |
| 0.677407175       | 0.075797431         | 0.077030968 | 0.165644012 | 0.067283451  | 0.094714397 | 0                 |
| 0                 | 0.098200816         | 0           | 0.031894041 | 0.322005359  | 0.067161118 | 0.052173185       |
| 0.260842154       | 1.33777686          | 0.293892509 | 0.026728375 | 0.120452005  | 0.18878338  |                   |
| 1.078814684       | 0.326627623         | 0.169132852 | 0.165237671 | 0.216015291  | 0.147283153 |                   |
| 0.621506852       | 0.077169808         | 0           | 0.065727073 | 0.69131449   | 0.043152587 | 0.087119374       |
| 0.009223125       | 0.043870089         | 0.114954195 | 0.244395372 | 6.818713104  | 0.269231886 | 0                 |
| 0.030833568       | 0.134078457         | 1.080076456 | 0.021023685 | 1.483533166  | 0.041975699 |                   |
| 1.300828295       | 0.027484088         | 0.131454145 | 0.02139302  | 0            | 0.437564858 | 0.201850354       |
| 0.110429342       | 0.102607263         | 0.193395889 | 0.044828416 | 0.034076213  | 0.401506682 | 0                 |
| 0.056916202       | 0                   | 0           | 0.393801863 | 0.428687986  | 0.185807921 | 0.117826522       |
| 0.525494152       | 0.047972227         | 0.106553696 | 0.046405295 | 0.500975788  | 0           | 0.220529043       |
| 0.46213665        | 0                   | 0.236029487 | 0.164025821 | 0.599652837  | 0.098969908 | 0.400371414       |
| 0.384777237       | 0.762335389         | 0           | 0.191502035 | 0.090646907  | 0.14282693  | 0.027240866       |
| 0.29842687        | 0.268811361         | 0.036096366 | 0.464636664 | 0.039548838  | 0.065760504 |                   |
| 0.286663308       | 0.347981974         | 0.18878338  | 0.067039228 | 0.06360646   | 0.626444344 |                   |
| 0.081183769       | 0.066317082         | 0.028197416 | 0.251283094 | 0.032863536  | 0.358627328 |                   |
| 0.263977287       | 0.017277182         | 0.167571625 | 0.218598083 | 0.417141678  | 0.15085782  |                   |
| 0.03382657        | 0.15546555          | 0.168926592 | 0.064639638 | 0.223399458  | 0.092577982 |                   |
| 0.039497357       | 0                   | 0.800742828 | 0.06095481  | 0.03701264   | 0.05322567  | 0.622792989       |
| 0.232946219       | 0.160602673         | 0.370058982 | 0.060794297 | 0.478133786  | 0.03079929  |                   |
| 0.038598344       | 0.179392831         | 0.069959498 | 0           | 0            | 0.209600099 | 0.239781288       |
| 0.106451339       | 0.081903802         | 0.042263861 | 0           | 0.664363575  | 0.412261326 | 0.100925177       |

0.080564045 0 0.093871956 0 0.045420983 0.084046905 0 0.152875798  
0.210985058 1.135408241 0 0.043102234 0.443263377 0.123747453 0.065920266  
0.352398722 0.486389953 0 0 0.16855952 0.033158541 0.026689751  
1.119211235 0.026160492 0.829675918 2.662044305 0.046973961 0.207753739 0  
0.057536783 0.01601848 0.024757785 0.123871948 0 0.090713691  
TCGA-BL-A5ZZ 377 0 0.055003323 0.088229313 0 0.254385885 0.147717258  
18.942318105 0 0.149912953 0.326232709 0.662576439 0.149467219  
7.189058768 0.589752078 0.280373149 0.074308987 0.231575749 0.195312301  
0.051600868 0.898556593 0.057349053 0.112839572 0 1.339271753  
33.079552987 0.044315177 0.399138975 0.569766567 0.148091226 0.34819068  
0.656588139 2.186767634 0.034389203 0.295434516 0.437190091 0.197788789  
0.146606602 0.277985227 0.090788974 0.162404398 0.409286781 0.099610105  
0.096210583 0 0.159043051 0.809975482 0.261727222 0 0.845170372  
0.166181915 0.358431582 3.072907698 0 0.565179074 1.507379102 0  
0.499966104 0.282078525 0.278202383 0.496494117 0.146240086 0.0926303  
0.122826319 0.502238677 0.525704516 0.117351457 0.082446842 0.414865491  
2.398470651 0.018291443 0.140013183 0.211229609 0.140930043 0.607101698  
0.46425424 0.207985899 0.246006361 0 0.07818235 0.166139008 0  
0.183373148 0.052275276 0.273229884 0.021034173 0.160043869 0.181783554 0  
0.142066871 0.349976273 0.818126352 0 0.063799356 0.107489956 0.252537203  
0.48564578 0.070904284 0.716053149 1.305834021 1.264779118 0.084032095 0  
0.042388431 0.830437737 0.592249567 0.125393428 0.357118646 0.241974937  
0.215385008 0.06219674 0.742806784 0.054313866 0 0 1.370923749 0  
0.183949793 0.053554422 0.0926303 0.040453689 0.07371901 2.109977894 0  
0.149989831 0.03255205 0.130934862 1.345522814 0.011097711 1.681168264 0  
1.502888143 0.17409534 1.734757835 0.135512048 0.270814973 0.837959719  
0.106550153 0.054648761 0.433303957 0.10208732 0.141980666 0.143901683  
0.423884306 0 0.270397693 0.170741489 0.461259051 0.083150013 0.150860178  
0.039232753 0.279885331 0.6552168 0.050645917 0.449969494 0.244958267  
0.317338341 0.072620775 3.783325595 0.644838172 0.025192091 0.124592192  
0.069267062 0.759688756 0.116541975 2.058295894 0.258505202 0.585326171  
0.048504174 0.146015446 0.598118959 0.405240772 0.057518224 0.21003962  
0.145357557 0.050810887 0.788356256 0 0.079343553 0.475577514 0.221812193  
0.066435019 0 0.091891541 0.342082071 1.0285017 0.070013207 0.178613845  
1.061152548 0.10408547 0.757230216 0.562184656 0.01824011 0.36664181  
0.188393025 1.700819271 0.079632874 0.107135594 0.24619543 0.029723595  
0.0434269 0.112798032 0 0.092462351 0.068657317 0.073510568 0.064352073  
0.039075507 0.056192156 2.235848418 0.526991299 0.211942153 0.461717331  
0.102692182 1.209129344 0.01083862 0.14262356 14.095291636 0.221575887  
0.034029107 0.051312311 0.296000566 0.408927003 0.168576467 0.259405917 0  
0.480992059 0.194830916 0.42462278 0.266375383 0.297689741 0 0.024775957  
0.151152543 0.065934663 0.044365593 0.153532898 0.020174525 0.008567082  
0.559388305 0.100379295 0.0455045 0.311978849 0.119757375 0.085969397  
0.193969237 0.370860007 1.030118841 0.095231639 0.172869636 0.280052827 0

|              |              |             |             |             |             |             |             |
|--------------|--------------|-------------|-------------|-------------|-------------|-------------|-------------|
|              | 0.642274787  | 0.497133435 | 0.685500401 | 4.865959565 | 0.072133838 | 0.460598695 |             |
|              | 0.057859579  | 0.242974182 | 0.186023815 | 0.026137638 | 0.170008595 | 0.024054624 |             |
|              | 0.038307815  |             |             |             |             |             |             |
| TCGA-FD-A62N | 82           | 0           | 0.03180663  | 0           | 0           | 0.1323927   | 0.04881147  |
|              | 24.39076     |             |             |             |             |             |             |
|              | 0.1662228    | 0.1964968   | 0           | 0           | 0.03142982  | 1.0519740   | 0.1278879   |
|              | 1.061219     |             |             |             |             |             |             |
|              | 0.06875274   | 0.2255372   | 0.1882379   | 0           | 0.3810444   | 0.09475167  | 0.07830173  |
|              | 0.06536492   | 1.13203734  | 6.61680     | 0.08053892  | 0.4787150   | 0.8786064   | 0           |
|              | 0.5033682    |             |             |             |             |             |             |
|              | 0.4372113    | 0.2634451   | 0           | 0           | 0.3370837   | 0.07624986  | 0.01695556  |
|              | 0.2296425    | 0.1050006   | 0.1936959   | 0.04437697  | 0.05400119  | 0.04945372  |             |
|              | 0.04107632   | 0.5150287   | 1.3023310   | 0.08984421  | 0.2270887   | 0.2562602   |             |
|              | 0.08290771   | 3.1560470   | 0.4902369   | 0.1124733   | 0           | 0.3776184   | 0           |
|              | 0.09213126   | 0.5742127   | 0           | 0           | 0.2130793   | 0           | 0.1399537   |
|              | 0.08906693   |             |             |             |             |             |             |
|              | 0.04767632   | 0.1476327   | 0.4623191   | 0           | 0.1022716   | 0.05896761  | 0.09313742  |
|              | 0.4130201    | 0.4881147   | 0           | 0.1855532   | 0.01991542  | 0.01808412  | 0.15721     |
|              | 0.03596634   | 0.07069247  | 0           | 0.1723635   | 0           | 0           | 0.1825760   |
|              | 0.04107632   | 0.05782281  | 0.07884929  | 0           | 0.04611635  | 0.02486317  | 0.06814921  |
|              | 0.2415165    | 0           | 0.1274062   | 0.2225981   | 0.8776566   | 0.2242755   | 0.06527033  |
|              | 0            | 0.3073376   | 0.9484022   | 0.5438319   | 0.1239060   | 0.07809835  | 0.08791773  |
|              | 0.03596634   | 0.2577245   | 0.03140794  | 0           | 0           | 1.1064430   | 0.4786747   |
|              | 0.02252274   | 0.1071302   | 0           | 0           | 1.3887970   | 0.1972382   | 0           |
|              | 0.05320538   |             |             |             |             |             |             |
|              | 0.8835732    | 0.01283489  | 1.7282930   | 1.54335     | 0.1006736   | 0.4012615   |             |
|              | 0.02612073   | 0.1252828   | 0.8448821   | 0           | 0.06741673  | 0           | 0.1180675   |
|              | 0            | 0.1248205   | 0.3921895   | 0           | 0.1389886   | 0.1184811   | 0           |
|              | 0.2404147    |             |             |             |             |             |             |
|              | 0.5670438    | 0           | 0.07193269  | 0.2212499   | 0.1757213   | 0.08673422  | 0           |
|              | 0.2854544    | 0           | 1.4136380   | 0.3314568   | 0.1456776   | 0.0720476   | 0.2803842   |
|              | 0.5125204    | 0.07436405  | 0.8076665   | 0.1281301   | 0.1692375   | 0.05609676  |             |
|              | 0.0259803    | 0           | 0.3596808   | 0.06652182  | 0.1619454   | 0.2641745   | 0.05876455  |
|              | 1.6006480    | 0.04828886  | 0.06882268  | 0.2000080   | 0.4649670   | 0.0768344   | 0           |
|              | 0.07357552   |             |             |             |             |             |             |
|              | 0.8308225    | 0.7434362   | 0           | 0.0688577   | 1.3039630   | 0.0802523   | 0.3284111   |
|              | 0.3556573    | 0           | 0.1423331   | 0.2124360   | 0.7552092   | 0.01315688  | 0.123906    |
|              | 1.2338450    | 0.03437637  | 0.0358748   | 0.1304548   | 0           | 0.07338739  | 0           |
|              | 0.1912894    |             |             |             |             |             |             |
|              | 0            | 0.1807687   | 0           | 0.5412215   | 0.1218967   | 0.1470711   | 0.78045     |
|              | 0.133613     |             |             |             |             |             |             |
|              | 0.8553321    | 0.01253524  | 0.09425663  | 0.3318749   | 0.1281301   | 0           | 0           |
|              | 0.2160366    | 0.2252087   | 0.03249409  | 0.05000199  | 0.05160388  | 0.08558215  |             |
|              | 0.1261841    | 0.3879619   | 0           | 0.07377611  | 0.0815584   | 0.05730851  | 0           |
|              | 0.006932339  | 0.07696552  | 0           | 0           | 0           | 0.2310543   | 0.02902303  |
|              | 0            | 2.164886    |             |             |             |             |             |
|              | 0.1636860    | 0.0426114   | 0.1985891   | 0.01649663  | 0           | 0           | 0.1587677   |
|              | 0.6882680    |             |             |             |             |             |             |
|              | 0.4025933    | 0.2874760   | 0.3523578   | 6.3395020   | 0.03128448  | 1.9024940   | 0           |
|              | 0.2444807    | 0           | 0.2722442   | 0           | 0.03322824  |             |             |
| TCGA-BT-A20J | 579          | 1           | 0.145725242 | 0.077917946 | 0           | 0.134793472 | 0.027954328 |
|              | 53.548179111 | 0           | 0.211828183 | 0.398915816 | 0.626936871 | 0.03599972  |             |
|              | 0.264939628  | 0.488275975 | 0.337644432 | 0.078749387 | 0.051666056 | 0.043121534 |             |
|              | 0.145255238  | 0.238062664 | 0.03255857  | 0.269060407 | 0.299475931 | 2.350408809 |             |
|              | 43.656699803 | 0.109021879 | 0.254577246 | 1.006355809 | 0.065391896 | 0           |             |

|              |             |             |             |             |             |             |
|--------------|-------------|-------------|-------------|-------------|-------------|-------------|
| 0.711637322  | 0.120699996 | 0.045555201 | 0           | 1.042458259 | 0.101892699 | 0.213629917 |
| 0.105213031  | 0.092513607 | 0.053784069 | 0.059300949 | 0.105150044 | 0.07080537  |             |
| 0.376390515  | 0.463503736 | 0           | 0.057784785 | 0.274420176 | 0.033927057 | 0.366900555 |
| 0.28488749   | 1.714777332 | 0.193844646 | 1.3102072   | 0.096620196 | 0           | 0.094614649 |
| 5.231351713  | 0.019481935 | 0.119582403 | 0.064574498 | 0.122706884 | 0.122030547 |             |
| 0.039136059  | 0.018395421 | 0.097159297 | 0.054608455 | 0.295922412 | 1.0590806   |             |
| 0.056538022  | 0.156189261 | 0.231570855 | 0.240029109 | 0.662302541 | 2.571798177 |             |
| 0.172198661  | 0.056675368 | 0.007603709 | 0.082854207 | 0.200075903 | 0           | 0.053980771 |
| 0            | 0.032904203 | 0.111455444 | 0.636027884 | 0.228133652 | 0.231657391 | 0.047048814 |
| 0            | 0.090313983 | 0           | 0.095079015 | 0.113913116 | 0.104077475 | 0.115799846 |
| 0.093926542  | 1.386345149 | 0.294189056 | 1.563749999 | 0           | 0           | 0.264018389 |
| 0.362099987  | 0.581378114 | 0.141921973 | 0.007454487 | 0.285319418 | 0.164783407 |             |
| 0.508396045  | 0.107923952 | 0.053588795 | 0.091920993 | 1.110537644 | 0           | 0.304596687 |
| 0.012898776  | 0           | 0.482299153 | 0.097655195 | 0.168526697 | 0.075305537 | 0.099345381 |
| 0            | 0.084380469 | 0.860993303 | 0.073505404 | 0.361655256 | 0           | 3.340997268 |
| 0.076874402  | 0.091920993 | 0.019945791 | 0.071749442 | 0.498095299 | 0.070573222 |             |
| 0.053088152  | 0.143498884 | 0.360625467 | 0           | 1.239067853 | 0.304823716 | 0.102296234 |
| 0            | 0.090472151 | 0           | 0.275370992 | 0.549570193 | 0.15591428  | 0.205979259 |
| 0.804607428  | 0           | 0.546399596 | 0           | 0.420376477 | 0.048100185 | 0.385519389 |
| 0.320895142  | 0.200231001 | 0.08252332  | 0.229394308 | 0.503177904 | 0.191647314 |             |
| 0.056804459  | 0.48920074  | 0.6299951   | 0.128506463 | 0.089273499 | 0           | 0.436946819 |
| 0.038097049  | 0.370984547 | 0.137538866 | 0.050481692 | 0.858672566 | 0.055310062 |             |
| 0.052552999  | 0.916356509 | 0.183645923 | 0.132009195 | 2.765804258 | 0.149819389 |             |
| 1.170648789  | 0.965069416 | 0           | 0.078869616 | 0.966421054 | 0.551525959 | 0           |
| 0.241875891  | 0.024162581 | 0.305678096 | 0.124781638 | 0.080466664 | 0.316467783 |             |
| 0.33115127   | 0.521814123 | 0.039374694 | 0.057527392 | 0.169798837 | 0           | 0.052836409 |
| 0            | 0.146068609 | 0           | 0.207052498 | 0           | 0.199972638 | 0.418861607 |
| 0.75278103   | 0.08502238  | 0.839740608 | 0.08614719  | 0.107961543 | 0.186263452 |             |
| 0.391360592  | 0.090156367 | 0.067973155 | 0.057103461 | 0.249355584 | 0.186093653 |             |
| 0.057272282  | 0.709285101 | 0.049012901 | 0.361328125 | 0.655307403 | 0           | 0.140838599 |
| 0            | 0.131282333 | 0.1001155   | 0.047641806 | 0.146927185 | 0           | 0.02672509  |
| 1.746687233  | 0.099728954 | 0           | 0.206638393 | 0.100953989 | 0.10846021  | 0.227463984 |
| 0.491276354  | 0           | 0.126152865 | 0.235734803 | 0.092746137 | 0           | 0.766385791 |
| 0.036586118  | 0.908078874 | 4.784435685 | 0.071666495 | 0.261494029 | 0           | 0.160933328 |
| 0.033603381  | 0           | 0.398447605 | 0           | 0.101492334 |             |             |
| TCGA-DK-AA71 | 415         | 0           | 0.07673728  | 0.08206143  | 0           | 0.1064711   |
| 160.04260    | 0.1394329   | 0.1400431   | 0           | 0.0379141   | 0.14907     | 0.411393    |
| 0.8178789    | 0.03110141  | 0.09182283  | 0.04541463  | 0.1709771   | 0.1253611   |             |
| 0.1257298    | 0           | 0           | 2.55776769  | 68.2870     | 0.1059871   | 0.02062423  |
| 0.06886928   | 0           | 1.0270660   | 1906778     | 0.04797771  | 0           | 0.44729     |
| 0.06136097   | 0.3878280   | 1364066     | 0.08496626  | 0.03568824  | 0.09554183  |             |
| 0.01491413   | 0.1982030   | 11.162470   | 1217153     | 0.1806332   | 0           | 0.6182583   |
| 0.2500309    | 11.169320   | 1531146     | 0.7392219   | 0.2204761   | 0.4090731   |             |
| 0.4982301    | 0.6395004   | 0.02222776  | 2.7077420   | 0.06461607  | 0.8567989   |             |

|              |             |             |            |            |                                 |
|--------------|-------------|-------------|------------|------------|---------------------------------|
| 0.08243444   | 0.005535327 | 0.05116299  | 0.1150248  | 0.7568858  | 0.1859                          |
| 0.008506368  | 0.09252845  | 0.01016188  | 0.1544848  | 1.0961060  | 0.9421079                       |
| 0.07254231   | 0.02984461  | 0           | 0.1090752  | 0          | 0.08677309 0.1989797            |
| 0.4375876    | 0.6584254   | 0           | 0.0372139  | 0.2402652  | 0.4879527 0.1486523             |
| 0.2790089    | 0           | 0           | 0.01112612 | 0.05998537 | 0.007829433 0.1897121           |
| 0.04946066   | 0           | 0.1693755   | 0.5587718  | 0.01803638 | 0.3936811 0 0                   |
| 1.1440670    | 0.6122944   | 0.04982301  | 0.04710539 | 0.26514    | 0.1735462 0.2763516             |
| 0            | 0.05643852  | 0.04840456  | 4.4444550  | 0.3177963  | 0.1924766 0 0.06461607          |
| 0.5643852    | 0.2056965   | 0.06060584  | 0.3965505  | 0          | 0 0.1036789                     |
| 1.8612830    | 1.1827550   | 0.1236517   | 0.5663602  | 0.0404812  | 0.1452137                       |
| 0.3045937    | 0           | 1.55876     | 3.27035    | 0.07115977 | 0.0503766 0.1899013 0           |
| 0.4517164    | 1.0813760   | 0           | 0          | 0          | 0.1740087 1.2628250 0 0.1334479 |
| 0            | 0.1569425   | 0.06835016  | 0.09838468 | 0          | 0.5684285 1.2423580 0.1757323   |
| 0            | 0           | 0.7949035   | 0.4036773  | 0.05982518 | 0.1545646 0.8166113             |
| 0.06767006   | 0.06268056  | 0.03337836  | 0.8151806  | 0.04012296 | 0.04883907                      |
| 0.1255391    | 0           | 0.04888295  | 0.05825132 | 0.1106953  | 0.6634967 0.2707765             |
| 0.1390291    | 0.1974836   | 0.09368568  | 0.8670078  | 0.2391505  | 0 0.08306371                    |
| 0            | 0.1936183   | 0.1320552   | 0.3284783  | 0          | 0.1681207 0.3154013             |
| 0.2966099    | 0.1110989   | 0.2491151   | 0.6411567  | 0.1244056  | 0 0.07868446                    |
| 0.1363577    | 0.06829296  | 0           | 0.1794755  | 0.08978008 | 0 0.1567917                     |
| 0.1287041    | 0.1470452   | 0.4731020   | 0.2973045  | 0.07163493 | 0.6878635                       |
| 0.01512138   | 0.1705540   | 0.2121822   | 0.05152152 | 0          | 0 0.03608405 0.2626157          |
| 0.03919793   | 0.06031788  | 0           | 0.2064771  | 0.1522171  | 0.3080520 0.1486523 0           |
| 0            | 0.0691318   | 0           | 0.05017528 | 0.03094808 | 0 0.08443879 0.3705203          |
| 1.0591470    | 0.03501076  | 0.03174255  | 0.07254231 | 0.04556677 | 0.03997975                      |
| 0.06210814   | 0.1990005   | 0           | 0.03321534 | 0.1702427  | 0.04883907 0.1572449            |
| 0.5677343    | 0.03853168  | 1.0626311   | 1.83084    | 0.05660816 | 0.1529998 0 0                   |
| 0.03539033   | 0.03646564  | 0.7845370   | 0.04008354 |            |                                 |
| TCGA-KQ-A41O | 1538        | 0           | 0.2685671  | 0.2513006  | 0.06087407 0.2173677            |
| 0.1030379    | 88.946210   | 0.3415937   | 0.3982276  | 0          | 0 0.03009918                    |
| 0.5849204    | 1.8045780   | 0.2267698   | 0.04463388 | 0.1192075  | 0.2913216 0                     |
| 0.1300096    | 0.02754833  | 0.1379812   | 3.542764   | 152.25     | 0.2627467 0                     |
| 0.3863922    | 0           | 0           | 1.9672880  | 0.2098921  | 0.03606327 0.4980936            |
| 0.2011983    | 0.07158424  | 0.6301892   | 0.5114991  | 0.2973671  | 0.03903208                      |
| 0.1082934    | 0.1565905   | 0.3468380   | 0.03882832 | 14.493270  | 0.4109202                       |
| 0.01042109   | 1.7580850   | 0.3937791   | 3.6300530  | 0.1786248  | 0.6036678 0.0148390             |
| 2.0177324    | 7.775680    | 0.007480126 | 2.2589630  | 0.1696087  | 1.6867390 0.00484317            |
| 0.2909751    | 0.1509625   | 0.5064204   | 0.05421813 | 0.03721351 | 0.503741                        |
| 0.2133890    | 1.843193    | 0.4795226   | 15.816320  | 0.1586784  | 0 0 0.3244827 0                 |
| 0.6073814    | 0.6715230   | 0.1276234   | 0.3941693  | 0.1540567  | 0.06512109                      |
| 0.07007388   | 0.1067343   | 0.04335475  | 0.3051508  | 0          | 0 0.05840923                    |
| 0.07872688   | 0           | 0.4446157   | 0.3894833  | 0.06723661 | 0.8168865 0.7204857             |
| 0            | 0           | 0           | 0.04054814 | 9.3983580  | 0.8035964 0.1743719 0.2610294   |
| 0.5876978    | 0.07592268  | 0.8160603   | 0.06630017 | 0          | 0.2964632 5.116716              |

|              |            |            |            |            |            |            |
|--------------|------------|------------|------------|------------|------------|------------|
| 0.05561159   | 1.4034060  | 0.04754409 | 0.1696087  | 0.4444312  | 0.7199020  | 0.01893838 |
| 0.4857502    | 0          | 0.1192075  | 0.5486068  | 1.5032690  | 0.09482773 | 0.4384996  |
| 0.2688571    | 0.03541929 | 0.1270557  | 0.3675947  | 0          | 1.3245060  | 0.520257   |
| 0.1645488    | 0          | 0.0830777  | 0.1733138  | 1.3613550  | 0.6504829  | 0.0471322  |
| 0            | 0          | 0.9135004  | 1.4732230  | 0.2873452  | 0          | 0.3736357  |
| 0.2288631    | 0          | 0.2152058  | 0.04432358 | 0.6394503  | 1.2536010  | 0.06150326 |
| 0.1901099    | 0.4650433  | 2.3956320  | 0.4611223  | 0.1346     | 0.2704745  | 0.6251869  |
| 0.05920836   | 0.02742138 | 0          | 0.7132475  | 0.2457409  | 0.3418565  | 0.02534799 |
| 0.2015784    | 0          | 0.05096737 | 0.1937071  | 0.1055510  | 0.6684462  | 0.4865777  |
| 0.08639477   | 0.3580834  | 2.0043590  | 0.08546413 | 0.1090157  | 0.08095837 |            |
| 0.2541113    | 0          | 1.4428860  | 0.3974784  | 0.3679499  | 0.0185372  | 0.1527534  |
| 0.08718593   | 0.3005273  | 0.3628317  | 0.1211671  | 0.8824739  | 0.05965353 |            |
| 0.2368004    | 0          | 0.3813666  | 0.2356610  | 0.4801508  | 0.09623077 | 0.04288605 |
| 2.0179751    | 6.041260   | 1.096855   | 0.6161804  | 0.2778416  | 0.04974244 | 0.04553685 |
| 0            | 0.2076942  | 0          | 0.02104798 | 0.6893319  | 0.1371859  | 0          |
| 0.3900368    | 1.7986090  | 0.1816928  | 0          | 0.09073098 | 0          | 0.2634071  |
| 0.02707823   | 0.9370772  | 0.01231338 | 1.1294333  | 0.0239940  | 0.1110934  | 0          |
| 0.3986894    | 0.00499722 | 0.2018414  | 0.9924655  | 1.6466630  | 0.05812396 |            |
| 0.9806201    | 0.04273206 | 0.1719780  | 0.5266671  | 0          | 4.6022937  | 7.827080   |
| 0            | 0          | 0.1482976  | 0          | 0          | 0.6545085  | 0.03523577 |
| 0.3507136    |            |            |            |            |            |            |
| TCGA-E7-A677 | 820        | 0          | 0.3365528  | 0.4766288  | 0.1319505  | 0.3533742  |
| 0.3210581    | 18.602560  | 0.03169081 | 0.1189989  | 0.9295970  | 0.5008994  | 0.7010846  |
| 0.3352761    | 1.1459610  | 0.5732515  | 0.2506883  | 0.1048106  | 0.1076641  | 0.00853335 |
| 0.4160696    | 0.17884    | 0.8807770  | 3.3853814  | 4.949960   | 0.1340068  | 0.02933622 |
| 0.1675086    | 0.6857249  | 0.05758107 | 1.23717    | 0.3616306  | 0.6141980  | 0.03908533 |
| 1.3495830    | 2.980132   | 0.1260722  | 0.4203066  | 0.2633220  | 0.1275716  | 0.03384233 |
| 0.06383188   | 0.07778495 | 0.1409635  | 0.04208208 | 10.650460  | 0.1731296  |            |
| 0.01712903   | 0.1129436  | 1.5023421  | 0.0195245  | 7.278010   | 0.4355851  | 1.285143   |
| 0.1769074    | 0          | 0.8909246  | 0          | 0.07782673 | 1.3435580  | 0.06449079 |
| 0.06127391   |            |            |            |            |            |            |
| 0.5687377    | 0          | 0.01574707 | 0.3735784  | 0.2181507  | 0.2744289  | 0.2350462  |
| 0.03226556   | 0.2388548  | 0.1975437  | 0.5393654  | 1.5591182  | 4.567920   | 0.1547779  |
| 0.02122571   | 0.2809725  | 0.2068670  | 0.09990828 | 0.1439986  | 0.5121526  |            |
| 0.6570108    | 0.3943386  | 0          | 0.2117345  | 0.09809689 | 0.05783928 | 0.1879513  |
| 0.5952996    | 0.09019691 | 0          | 0.1899115  | 0.02844136 | 0.01484894 | 1.439197   |
| 0.07035359   | 0          | 0.2683444  | 0.6135340  | 0.01068967 | 0.4666483  | 0.1401974  |
| 0            |            |            |            |            |            |            |
| 2.8629091    | 0.0783030  | 4.488370   | 0.6402549  | 0.5447565  | 0.1645698  | 0.9172024  |
| 0.2694601    | 0          | 0.04590092 | 3.2229090  | 0.06027177 | 0.9430257  | 0.1094975  |
| 0.03063696   | 0.4013950  | 0.4144966  | 3.8567221  | 6.921780   | 0.0496083  | 0          |
| 0.4073103    |            |            |            |            |            |            |
| 2.00638      | 0.7561243  | 2.09108    | 0.08794199 | 0.9884303  | 0.01919369 | 0.4131083  |
| 0.07967974   | 0.1074847  | 1.3786460  | 0.3171678  | 0.1759278  | 0.2388548  |            |
| 0.2926284    | 0.06261242 | 0.7615149  | 1.5862330  | 0.05962169 | 0.02258872 |            |
| 0.02773798   | 0.6875351  | 0.3243251  | 0.1038081  | 0.0822849  | 0.544146   |            |
| 0.5025257    | 0.6697121  | 0.03240743 | 0.8863111  | 0.07205675 | 0.2695138  |            |
| 1.0855670    | 0.3502695  | 0.0229097  | 3.1826630  | 0.9995275  | 0.4133246  |            |

|              |             |            |            |            |            |            |           |
|--------------|-------------|------------|------------|------------|------------|------------|-----------|
| 1.685555     | 0.8953694   | 0.06416994 | 0.6389641  | 0.1266077  | 0.9351009  |            |           |
| 0.09511916   | 0.5094425   | 0.1190458  | 0.4201355  | 0.1622410  | 0.1104767  |            |           |
| 0.3673941    | 0.4003863   | 0.4218381  | 0.3295952  | 0.8193023  | 0.2080725  |            |           |
| 0.5883371    | 0.1417380   | 0.04631296 | 0.3347614  | 0.04387129 | 1.49178    | 0.3130621  |           |
| 0.9090373    | 0           | 0.6122597  | 0.4797866  | 0.1406341  | 0.2709065  | 0.188984   |           |
| 0.4451385    | 0.1376328   | 0.1969811  | 0.4171637  | 0.4525670  | 0.1427132  | 0          |           |
| 0.2188189    | 0.1702727   | 0          | 0.1486819  | 0.1630993  | 0.4415586  | 0.9253027  |           |
| 1.5271040    | 0.4075784   | 0.5280402  | 0.1218837  | 0.1078216  | 0.5523715  |            |           |
| 0.09771332   | 0.2926284   | 0.03394252 | 0.08364318 | 0.3177309  | 0.3159491  |            |           |
| 0.05719804   | 0.02951524  | 0.2202722  | 0.7887363  | 0.6811419  | 0          | 0.1687872  |           |
| 0.1865918    | 0.3113914   | 0.3999429  | 0.08723009 | 0.3961892  | 0.05078015 | 0          |           |
| 0            | 13.083170   | 0.03319989 | 0.1655541  | 0.75415    | 0.2088479  | 0.06769976 | 0.216652  |
| 0.7737008    | 0.9734459   | 0          | 1.2948610  | 0.7641638  | 0.09319479 | 0.5578283  |           |
| 0.09134673   | 1.8389959   | 0.9175240  | 0.4354060  | 0.1741034  | 0.07654694 | 0.7634424  |           |
| 0.1398326    | 0           | 1.2110952  | 0.4376980  | 0.126701   |            |            |           |
| TCGA-DK-A1A5 | 65          | 1          | 0.1232082  | 0.0768580  | 0.03723555 | 0.2279311  | 0.1418094 |
| 32.986780    | 0.03577175  | 0.1268604  | 0.01873758 | 0.1413505  | 0.01014572 |            |           |
| 1.0453420    | 0.3027412   | 0.1332205  | 0.1220656  | 0.1237678  | 0.04861136 |            |           |
| 0.06260944   | 0.5591053   | 0.02446908 | 0.1011049  | 0.08440059 | 1.257535   |            |           |
| 13.532630    | 0.1039936   | 0.08830388 | 0.09453962 | 0.03685849 | 0.5849639  |            |           |
| 0.4605430    | 0.2040996   | 0.05135486 | 0.2867702  | 0.1740999  | 0.3076733  |            |           |
| 0.1204136    | 0.4151271   | 0.07300409 | 0.1250521  | 0.1432512  | 0.08483512 |            |           |
| 0.07183767   | 0.05303862  | 0          | 1.0620620  | 0.1546784  | 0.02549755 | 0.3722498  |           |
| 0.2141044    | 2.1377150   | 0.1092616  | 0.6330044  | 0.2723024  | 0          | 0.1523716  | 0         |
| 0.07595257   | 0.3707179   | 0.1091933  | 0.06916438 | 0.1604940  | 0.02205925 |            |           |
| 0.1570114    | 0.08762296  | 0.1539017  | 0.5718796  | 0.6301206  | 0.01365769 |            |           |
| 0.1155484    | 0.2556137   | 0.2555547  | 0.5866305  | 1.6386870  | 0.09706068 |            |           |
| 0.03993171   | 0.09428915  | 0.1634542  | 0.01127738 | 0.2322026  | 0.3042654  |            |           |
| 0.1561298    | 0.7233184   | 0          | 0.1394168  | 0.1357325  | 0.06528745 | 0.05303862 |           |
| 0.03733103   | 0.1018119   | 0.06169111 | 0.1071836  | 0.01605193 | 0.02933191 |            |           |
| 0.2357015    | 0.1852977   | 0          | 0.6212768  | 0.3620101  | 0.2944158  | 0          | 0         |
| 0.8928921    | 0.8163982   | 0.1404415  | 0.05333004 | 0.2100880  | 0.2081223  |            |           |
| 0.06966077   | 0.6378273   | 0.1419411  | 0          | 0.1036235  | 0.7879736  | 0.1360664  |           |
| 0.2403625    | 0.007270463 | 0.1383288  | 0.1812336  | 0.08256579 | 2.117603   |            |           |
| 0.5518027    | 0           | 0.02430568 | 0.08191146 | 0.8854658  | 0.05800439 | 0.7402933  |           |
| 0.2977998    | 0.3901775   | 0.2166533  | 1.5284470  | 0.3091701  | 0          | 1.114995   |           |
| 0.4375686    | 0.3101154   | 0.0269613  | 0.05081711 | 0.1413505  | 0.2417563  |            |           |
| 0.4792748    | 0           | 0.1570319  | 0.02549755 | 0.06261979 | 0.4035572  | 0          |           |
| 0.05858793   | 0.1625418   | 0.6963514  | 0.1890792  | 0.1679896  | 0.1829033  | 0          |           |
| 0.05422384   | 0.34768     | 0.5324326  | 0.01881021 | 0.3721176  | 0.1810190  | 0.6145075  |           |
| 0.2190467    | 0.4574019   | 0.3033146  | 0.5463078  | 0.07243334 | 0.07547921 |            |           |
| 0.01786393   | 0.2181402   | 0.08589441 | 0.07841527 | 0.1963954  | 0.08536281 |            |           |
| 0.2223762    | 0.03117581  | 0.05924355 | 0.2582546  | 0.2484312  | 0.1240128  |            |           |
| 0.2113844    | 0.05541801  | 0.3575920  | 0.3199803  | 0          | 0.04445527 | 0.2971245  |           |

|              |            |            |            |            |             |
|--------------|------------|------------|------------|------------|-------------|
| 0.1554353    | 0.6360773  | 0.5740405  | 0.01361937 | 0.1856979  | 0.5943208   |
| 1.7348460    | 0.05945958 | 0          | 0.1960822  | 0.5548438  | 0.1250702   |
| 0.03648898   | 0.1069427  | 0.02563222 | 0.1509426  | 0          | 0.05835311  |
| 0.6662746    | 0.5771175  | 0.1582511  | 0.6099442  | 0.0766773  | 0.2892537   |
| 0.04046443   | 0.06085309 | 0.4778042  | 0.02757406 | 0.1016342  | 0.03831343  |
| 0.4205724    | 0.3053340  | 0.1048927  | 0.06456364 | 0.03331602 | 0.05525276  |
| 0.4364239    | 1.2349240  | 0.07955793 | 0.06350753 | 0.05265498 | 0.05549848  |
| 0.07160948   | 0.06625302 | 0.1146386  | 0          | 0          | 2.9237540   |
| 0.3105942    | 0.1138065  | 0.04585062 | 0.2421768  | 0.1384552  | 0.07325334  |
| 0.01777668   | 0.1974115  | 0.1306921  | 0.1472742  | 0.4502815  | 0.1031098   |
| 0.5687149    | 4.8038970  | 0.09088919 | 0.3602927  | 0.04320208 | 0.1814218   |
| 0.03156787   | 0.05854867 | 0.1367052  | 0.0179609  | 0.07865919 |             |
| TCGA-HQ-A5NE | 370        | 1          | 0.04591008 | 0.08182566 | 0           |
| 21.5357      | 0.3199041  | 0.4560260  | 0.08378442 | 0.2106812  | 0.01512207  |
| 0.08204221   | 0.2552961  | 0.03307952 | 0.2441574  | 0.03622732 | 0.8183324   |
| 0.6666717    | 0.02735315 | 0.05023186 | 0.1886971  | 1.1377462  | 1.897380    |
| 0.6745313    | 0.2818203  | 0.1098743  | 0.1937515  | 1.1071510  | 0.2535066   |
| 0.1148157    | 0.1972742  | 0.9406648  | 0.07337334 | 0.09789548 | 0.1767834   |
| 0.1165840    | 0.06212957 | 0.1067571  | 0.1403028  | 0.04758808 | 0.03952671  |
| 0.03539994   | 2.8361920  | 0.2427311  | 0.08645484 | 0.03800379 | 0.4931856   |
| 3.1602810    | 0.08142651 | 0.8648616  | 0.2705756  | 0.1631591  | 0.1362648   |
| 0.08183594   | 0.5023186  | 0.05425041 | 0.05154433 | 0.1366939  | 0.03287904  |
| 0.07727193   | 0.07754432 | 0.04587773 | 0.2486107  | 0.7414635  | 0.006785542 |
| 0.0820112    | 0.0810615  | 0.3472923  | 0.8346217  | 4.0394250  | 0.05786711  |
| 0.1309390    | 0.03194019 | 0.05220569 | 0          | 0.03460951 | 0.3174528   |
| 0.4146528    | 0          | 0.2671703  | 0.1277733  | 0.09731015 | 0.1581068   |
| 0.0758747    | 0.09194985 | 0.06212726 | 0          | 0.07806938 | 0.3080721   |
| 0.1225998    | 0.4349919  | 0.9383855  | 0.1115042  | 0.0314040  | 0.04717427  |
| 0.1109037    | 0.6591171  | 0.2791018  | 0.07948778 | 0.1002028  | 0.3807046   |
| 0.06921903   | 0.4822259  | 0.1208923  | 0.1800844  | 0.07722478 | 2.3379540   |
| 0.3582574    | 0.02167307 | 0          | 0.1350633  | 0.2461266  | 0.6526625   |
| 0.08346217   | 0.07245464 | 0.1220881  | 0.5355090  | 0.03705207 | 1.5991280   |
| 1.3697780    | 0.3088991  | 0.1591904  | 0          | 1.0162610  | 0.5336106   |
| 0.04018549   | 0.03787114 | 0.0526703  | 0.1601488  | 0.6065263  | 0.08594125  |
| 0.03800379   | 0.1400011  | 0.4164211  | 0.3777591  | 0.0436623  | 0.06921903  |
| 0.8037098    | 0          | 0.2503865  | 0.1090461  | 0.1177224  | 0.04040999  |
| 0.7328315    | 0.08410916 | 0.1386592  | 0.3083505  | 0.3522754  | 0.4025175   |
| 0.2249781    | 0.4931856  | 0.5292723  | 0.05398051 | 0.2125016  | 0.05325194  |
| 0.2517177    | 0          | 0.1558360  | 0.2233954  | 0.08482149 | 0.2339640   |
| 0.7217350    | 0.4551403  | 0.1478716  | 0.3150659  | 0.09833317 | 0.2728383   |
| 1.2400090    | 0.1325201  | 0.07381008 | 0.1930620  | 0.7373842  | 1.3208330   |
| 0.2311260    | 0.2096634  | 0.3380088  | 0.0633027  | 0.1589756  | 1.4430240   |
| 0.06904284   | 0.1654759  | 0.1631591  | 0.07263653 | 0.03820451 | 0.1636205   |
| 0.3580885    | 0          | 0.0625365  | 0.5282707  | 0.5864909  | 0.1415228   |
|              |            |            |            |            | 0.5929007   |



|                           |                    |                            |                           |                    |            |            |
|---------------------------|--------------------|----------------------------|---------------------------|--------------------|------------|------------|
| 0.1571440.3658065         | 0.06031174         | 0.06802559                 | 0.8878066                 | 0.2054940.07574228 |            |            |
| 0.1713171                 | 0.6652372          | 0.3322928                  | 0.3126825                 | 0.04811566         | 0          | 0          |
| 0.2601938                 | 0.3969542          | 0.1185801                  | 0.0709929                 | 0.1177224          | 0.1378664  | 0          |
| 0.06003734                | 0.07406199         | 0.1708674                  | 0.01122616                | 0.02860303         | 1.334027   |            |
| 0.02792814                | 0.03798162         | 0.1736013                  | 0.1332785                 | 0.05922783         | 0.2901848  |            |
| 0.1904916                 | 0.0272958          | 0                          | 0.2150212                 | 1.8700320.06271724 | 0.9876112  |            |
| 0.09221033                | 0.4662145          | 2.6495140.03512165         | 0.1464578                 | 0                  | 0.06760176 |            |
| 0.03764122                | 0                  | 0.0727705                  | 0.0107082                 | 0.1278988          |            |            |
| TCGA-XF-AAMT              | 90                 | 1                          | 0.1544370.1101014         | 0.0933468          | 0.2857033  | 0.2962549  |
| 30.331430.1345157         | 0.3273836          | 0.3288162                  | 0.4429442                 | 0.3052148          | 1.88724    |            |
| 0.3794751.2643310.1669143 | 0.2007674          | 0.09139883                 | 0.2475095                 | 0.4765562          |            |            |
| 0.0843455                 | 0.1267312          | 0.1586896                  | 2.09394435.734650.1007267 | 0.4704141          |            |            |
| 0.8887646                 | 0.09240152         | 0.8147009                  | 1.0614390.6822168         | 0.2253             | 0.2488541  |            |
| 1.1456960.4833571         | 0.04116383         | 1.1150280.3268141          | 0.1044989                 | 0.1436481          |            |            |
| 0.08011746                | 0.06003059         | 0                          | 0.5656395.6578380         | 0.3150610.08789067 |            |            |
| 0.6739798                 | 0.7715697          | 3.5581770.1711942          | 0.5620255                 | 0.4664721          | 0          |            |
| 0.4583812                 | 0.06600108         | 0.2695528                  | 0.7181437                 | 0.1368697          | 0          | 0.6322592  |
| 0.1106018                 | 0.2859286          | 0.2196643                  | 0.1157461                 | 0.4181509          | 0.7066927  |            |
| 0.0627712                 | 0.1517327          | 0.2999511                  | 0.4522284                 | 0.8355906          | 0.4740078  |            |
| 0.1703268                 | 0.2302435          | 0.2363760.1170765          | 0.2968515                 | 0.1455287          |            |            |
| 0.1716235                 | 0.1957029          | 0.1394851                  | 0.5118466                 | 0.2496484          | 0.1701358  |            |
| 0.1636709                 | 0.06648197         | 0.1403792                  | 0.1914262                 | 0                  | 0.09703104 | 0.04024101 |
| 0.0551497                 | 0.7136090.09954164 | 0.1546551                  | 0.6845220.5524112         | 0.5777584          |            |            |
| 0.02640999                | 0                  | 1.2435642.5583130.7921722  | 0.3676599                 | 0.2686044          |            |            |
| 0.5454632                 | 0.08731722         | 0.7647326                  | 0.07625056                | 0.03786162         | 0.03247206 |            |
| 2.0215460.04263855        | 0.2582448          | 0.03645303                 | 0.04334751                | 0.3407546          |            |            |
| 0.6209592                 | 1.2545670.8512793  | 0.07018961                 | 0.06093255                | 0.1291693          |            |            |
| 1.0885550.03115987        | 1.1431030          | 1.3580870.1629402          | 2.04574                   | 0.06341456         |            |            |
| 0.20277                   | 0.8948692          | 0.4986147                  | 0.2318670.2365650.1910921 | 0.2657665          |            |            |
| 0.6060653                 | 1.0314820.1806861  | 0.02811911                 | 0.06392049                | 0.03924581         |            |            |
| 0.3891109                 | 0.6000737          | 0                          | 0.05821148                | 0.8101848          | 0.5688093  | 0.3509481  |
| 0.1375575                 | 0.09900163         | 0                          | 1.3618881.73073           | 0.02357791         | 0.1166089  |            |
| 0.4213870.7702627         | 0.4551041          | 1.1122730.5875722          | 0.7190156                 | 0.04539627         |            |            |
| 0.2417822                 | 0.1791342          | 0.6879871                  | 0.1614982                 | 0.06552711         | 0.3368703  |            |
| 0.05944397                | 0.9018073          | 0.03907773                 | 0.4455577                 | 1.2948510.2789619  |            |            |
| 0.3108910.4968049         | 0.1653915          | 0.6403263                  | 0.7620587                 | 0.2293449          |            |            |
| 0.2228922                 | 0.6207245          | 0.2922486                  | 0.6644163                 | 1.4165920.01707137 |            |            |
| 0.3887425                 | 0.2292183          | 0.5969397                  | 0.2022968                 | 0.1002709          | 1.566859   |            |
| 0.2781905                 | 0.1741899          | 0.1919464                  | 0.1372128                 | 0.1136869          | 0          | 0.189201   |
| 0.1806861                 | 0.03657174         | 0.2629582                  | 1.6200670.5589876         | 0.5554135          |            |            |
| 0.6315787                 | 0.5766731          | 1.0107980.1521620.09534639 | 1.07965                   | 0.4147568          |            |            |
| 0.1592435                 | 0                  | 0.7235168                  | 0.3888                    | 0.05259164         | 0          | 0.1252812  |
| 0.4230453                 | 0.6219546          | 0.04986147                 | 0.2587142                 | 0.03300054         | 0.2086959  |            |
| 0.07073372                | 0.09536984         | 0.2076143                  | 0                         | 0.03776368         | 0.04009073 | 0.8227143  |

|              |            |             |            |             |            |            |            |
|--------------|------------|-------------|------------|-------------|------------|------------|------------|
| 0.07046062   | 0.1916496  | 1.8979270   | 0.2547362  | 0.1570903   | 0.3660574  |            |            |
| 0.5206457    | 0.04591019 | 0.02228242  | 0.1998621  | 0.6054140   | 0.1582309  | 2.257645   |            |
| 0.1033955    | 1.6752295  | 0.0650230   | 0.1097068  | 0.2873905   | 0.1083044  | 0.0568514  |            |
| 0.2374150    | 0.02446287 | 0.6487008   | 0.04052398 | 0.06274317  |            |            |            |
| TCGA-XF-A9SU | 182        | 1           | 0          | 0.02173601  | 0.07371344 | 0.09400507 | 1.933941   |
| 117.02250    | 0.2124468  | 0.1329562   | 0.2225633  | 0           | 0.04016997 | 1.67254    |            |
| 0.1089677    | 1.1302730  | 0.01098398  | 0.5693047  | 0.09623357  | 0.1430133  |            |            |
| 0.1328201    | 0.09688051 | 0.03335874  | 0.08354189 | 2.0944725   | 0.501180   | 0.07486222 |            |
| 0.1311082    | 0.09357777 | 0           | 4.374761   | 1.5293281   | 0.2121380  | 0.1016647  | 0          |
| 0.1292464    | 0.3086036  | 0.02167064  | 0.5870052  | 0.05161525  | 0.4276032  |            |            |
| 0.1606996    | 0.04601206 | 0.01580151  | 0.3674930  | 11.943440   | 0.1913808  |            |            |
| 0.1261907    | 0.9006860  | 5.9729710   | 0.3132821  | 0.1976568   | 0          | 1.478049   |            |
| 0.5211926    | 0.1340556  | 1.5345020   | 0.0684607  | 0.4538890   | 0.9170621  |            |            |
| 0.2785721    | 0.09757291 | 0.1218687   | 0.1415153  | 0.9191511   | 0.01802499 |            |            |
| 0.1089265    | 0.1830307  | 0.01487969  | 0.1055749  | 3.4311850   | 0.03842927 |            |            |
| 0.3003934    | 0.4581647  | 0.02311303  | 0.04465059 | 0           | 0.2710529  | 0.07727065 |            |
| 0.7343173    | 0.03109164 | 0           | 0.2262764  | 0.1292464   | 0          | 0          | 0          |
| 0.03536436   | 0          | 0.1617580   | 0.1651071  | 0.4192284   | 0.5699256  | 1.028574   |            |
| 0.9970838    | 0.03344168 | 0           | 0          | 0.5892052   | 2.2222530  | 0.7877383  | 0.3167248  |
| 0.04159012   | 0.4681929  | 0           | 0.2378955  | 0           | 0.05979658 | 0          | 2.638732   |
| 0.06734101   | 0.4758341  | 0.007196493 | 0.0684607  | 0.1793897   | 0.4358707  |            |            |
| 0.8439273    | 0.08402902 | 0.1108537   | 0          | 0.03138507  | 0.7584725  | 0.01640407 |            |
| 0.7009023    | 0.06550444 | 0.5553732   | 0          | 1.7436770   | 0.1669225  | 0          | 1.556227   |
| 0.1574970    | 0.06462321 | 0           | 0          | 0.0699562   | 0.2658852  | 1.7185760  | 0.1776392  |
| 0.05047628   | 0.1239654  | 0.1229081   | 1.1707180  | 0           | 0.09897163 | 0          |            |
| 0.1108537    | 0.07241697 | 0.2084771   | 0          | 0.8603568   | 0.5648397  | 0.2606637  |            |
| 0            | 0.3071611  | 0.2807333   | 0.1900871  | 1.1590360   | 0.3244498  | 0          |            |
| 0.04980752   | 0.2121862  | 0.6965189   | 0.2975718  | 0           | 0.1637030  | 0.05632955 |            |
| 0.2589574    | 0          | 0.2199030   | 0.1278135  | 0.3483635   | 0.04910043 | 0.05230844 |            |
| 0.07313891   | 2.3091270  | 0.3800697   | 0.2587249  | 0           | 0.7842708  | 0          | 0.1399124  |
| 0.1846651    | 0          | 0.2122327   | 0.3132821  | 0.9876682   | 0.01681561 | 0.1055749  |            |
| 0.6793053    | 0.1757436  | 0.009170205 | 0.09852364 | 0           | 0.03751812 | 0          |            |
| 0.4346383    | 0          | 0.05775943  | 0.08306038 | 0.6594959   | 0          | 1.4410980  | 0.367493   |
| 0.07589718   | 0.2602825  | 0.0160211   | 0.2108189  | 1.75604     | 0          | 0          | 0          |
| 0.6201924    | 0.1918905  | 0.04153019  | 0.06390677 | 0.06595413  | 0.05469061 |            |            |
| 0.1267152    | 0.3420724  | 0.3937425   | 0.0314307  | 0           | 0.07324512 | 0          |            |
| 0.04430057   | 0.06557896 | 0           | 0          | 0.0506537   | 0.2362455  | 0          | 0.01681561 |
| 0.04827798   | 0.03630731 | 0.0705038   | 0.04216818 | 0.1087621   | 0          | 0.1954031  |            |
| 0            | 0          | 0.4420767   | 0          | 1.1258584   | 0.9610150  | 0.01999211 | 0.1621032  |
| 0.08978802   | 0.08749075 | 0           | 0.4446042  | 0.007111264 | 0.08493699 |            |            |
| TCGA-CF-A47S | 333        | 0           | 0.2338001  | 0.03788205  | 0          | 0.2031545  | 0.07610848 |
| 52.430770    | 0.08753841 | 0.4654666   | 0.04876854 | 0.08401104  | 0.06069858 |            |            |
| 0.2468850    | 0.8930062  | 0.04977216  | 0.04395814 | 0.01677182  | 0          | 0.07716068 |            |
| 0.08020171   | 0.1162769  | 0.1164791   | 1.8315526  | 0.66001     | 0.03914151 | 0.03808309 |            |

|                    |                     |                    |                    |                            |            |            |
|--------------------|---------------------|--------------------|--------------------|----------------------------|------------|------------|
| 0.09785377         | 0.07630116          | 0                  | 1.8862480          | 0.01771838                 | 0.0152217  | 0.2703046  |
| 0.1019069          | 0.06798262          | 0.3069141          | 0.1259388          | 0.1359731                  | 0.04612938 |            |
| 0.03688783         | 0.04406281          | 0.2378910          | 22.006220.06742497 | 0.08005036                 |            |            |
| 0.03518851         | 0.8562205           | 0.2031425          | 7.7330230.1130918  | 0.4185967                  |            |            |
| 0.04384304         | 0                   | 1.1407910.07266778 | 0.01389183         | 2.2325160                  | 0.09545197 |            |
| 0.4904503          | 0                   | 0.00408844         | 0.1435998          | 0.06371873                 | 0.2959636  | 0.06865367 |
| 0.01884863         | 0.1252942           | 0.04878676         | 0.1763422          | 1.1407915.43632            | 0.05358037 |            |
| 0.03306523         | 0.008872228         | 0.1208459          | 0.02334544         | 0.03204568                 | 0.1469681  |            |
| 0.0808015          | 0.2559572           | 0                  | 0.1236893          | 0.1133785                  | 0.1351523  | 0.07319723 |
| 0.1287990.03512699 | 0.04256915          | 0.05341602         | 0.01107643         | 0.005782887                |            |            |
| 0.4704130.01826604 | 0                   | 0.1647688          | 0.5647661          | 0.006660912                | 0.1308493  | 0          |
| 0.05134405         | 2.8167250.4199426   | 0.07359941         | 0.0695849          | 0.4700033                  |            |            |
| 0.09613703         | 0.3061736           | 0.06996045         | 0                  | 0.03575203                 | 2.1495160  | 0.5686596  |
| 0                  | 0.09545197          | 0.2292729          | 0.1329381          | 0.03836914                 | 0.3514748  | 0          |
| 0.1221603          | 1.3512590.005717883 | 0.6959131          | 0                  | 0.8321869                  | 0.04484964 |            |
| 0.01787601         | 0.08921442          | 0.05581289         | 1.3173690.2744896  | 0.1651861                  | 0          |            |
| 0.05259853         | 0.1706899           | 0.3521773          | 2.1902230          | 0                          | 0.05278277 | 0.04320998 |
| 0.2784694          | 1.0493250           | 0.01602284         | 0.2414862          | 0.2609434                  | 0.07727938 | 0          |
| 0.1271686          | 0.01870823          | 0.6897473          | 1.0019950.2076759  | 0.09629061                 |            |            |
| 0.1427541          | 0.5545047           | 0.2608896          | 0.1009998          | 0.1522171.1120690          |            |            |
| 0.02893525         | 0.1109410.8108919   | 0.05927032         | 0.01803648         | 0.02139791                 |            |            |
| 0.08508284         | 0.04513172          | 0.1290748          | 0.1992912          | 0.4232374                  | 0.4499951  |            |
| 0.1198028          | 0.07293154          | 0.06737608         | 0.5669414          | 0.1103991                  | 0.1623283  |            |
| 0.07668947         | 0.1366846           | 0.2323882          | 0.1706899          | 0.2698494                  | 0.0281936  |            |
| 0.2655240.3615705  | 0.03912118          | 0.08205862         | 0.07359941         | 0.5073899                  |            |            |
| 0.1225161          | 0.0575354           | 0.2403931          | 0.1510725          | 0.04296892                 | 0          | 0.2367182  |
| 0.1989370.06039872 | 0.08685579          | 0.4830876          | 0.09050739         | 1.0701510.3476868          |            |            |
| 0.08597904         | 0.4173366           | 0.02233757         | 0.1049772          | 0.3711003                  | 0          | 0.1577956  |
| 0.02643768         | 0.03997799          | 0.2040032          | 0.01447597         | 0                          | 0.09195716 | 0.0762529  |
| 0.2369036          | 0.1629902           | 0.02744896         | 0.0876451          | 0.03633389                 | 0.153184   |            |
| 0.03893922         | 0.04941319          | 0.06857556         | 0.3559720          | 0                          | 0.8646423  | 0.01292963 |
| 0.04689064         | 0                   | 0.1458427          | 0.08436968         | 0.1359825                  | 0.5438388  | 0.9098554  |
| 0                  | 0.2829211           | 0.03607296         | 0.05807121         | 0.5633214                  | 0.01422991 | 1.491251   |
| 4.9723             | 0.09059109          | 0.0113007          | 0                  | 0.1251878                  | 0.0566358  | 0          |
| 0.04213852         | 0.0592121           |                    |                    |                            |            |            |
| TCGA-FD-A6TK       | 330                 | 0                  | 0.03839017         | 0.1094766                  | 0.09281715 | 0.3077557  |
| 0.4909565          | 21.090490.1337525   | 0.1581127          | 0.1167680.3523447  | 0.101161                   |            |            |
| 6.9197090.3773219  | 0.8776377           | 0.1383060.3334699  | 0.03029341         | 0.09604103                 |            |            |
| 0.6968415          | 0.0228728           | 0.08400811         | 0.05259638         | 1.57889714.387670.02945739 |            |            |
| 0.3852017          | 0.05891478          | 0.09187723         | 1.7821720.6850947  | 0.08479324                 |            |            |
| 0.1920185          | 0.1649614           | 0.4611028          | 0.1738393          | 0.05457369                 | 0.2956538  |            |
| 0.1949758          | 0.1889199           | 0.1190276          | 0.09704385         | 0.05968997                 | 0.1322095  |            |
| 0.02960155         | 1.3237020.04059452  | 0.04819589         | 0.08739198         | 0.3093026                  |            |            |
| 0.1334246          | 1.7038770.03404456  | 0.5588366          | 0.5543278          | 0                          | 0.4652757  |            |

|              |            |            |            |             |            |            |
|--------------|------------|------------|------------|-------------|------------|------------|
| 0.2296931    | 0.2030134  | 0.2940284  | 0          | 0.0862031   | 0.1428799  | 0.08248069 |
| 0.2344603    | 0.1604007  | 0.1918156  | 0.1187938  | 0.9093543   | 0.04539275 |            |
| 0.1097249    | 0.1762382  | 0.2060953  | 0.4985097  | 0.3142122   | 0.04838867 |            |
| 0.1692144    | 0.2243514  | 0.02910305 | 0.07027789 | 0.05788119  | 0.1706497  |            |
| 0.2432406    | 0.4623122  | 0.09787353 | 0.8936349  | 0.1691704   | 0.2441133  | 0          |
| 0.2326379    | 0.3172334  | 0          | 0.05195103 | 0.02000634  | 0.09400591 | 0.4474295  |
| 0.2309459    | 0.05125919 | 0.5318345  | 0.7650642  | 0.2165580   | 0.05252027 |            |
| 0.03944729   | 1.0201191  | 1.871050   | 0.6418112  | 0.1329359   | 0.06284243 | 0.1886498  |
| 0.1157624    | 0.2880278  | 0.07581791 | 0.1129404  | 0.06457563  | 0.7801664  |            |
| 0.04239662   | 0.4707624  | 0.07702317 | 0.0862031  | 0.3388211   | 0.137208   |            |
| 1.7152410    | 0.2116123  | 0          | 0          | 0.1580755   | 0.6260815  | 0.04131076 |
| 1.885447     |            |            |            |             |            |            |
| 0.04124035   | 1.0288620  | 0.2160209  | 1.5175270  | 0.1261095   | 0          | 0.5498713  |
| 0.04957856   | 0.06441878 | 0.2016195  | 0.1266719  | 0           | 0.1004377  | 0.7438631  |
| 0            | 0.05591911 | 0.0635578  | 0          | 0.2708321   | 0.3158835  | 0          |
| 0.02894059   |            |            |            |             |            |            |
| 0.3427086    | 0          | 0.1046870  | 0.2279617  | 0.06562659  | 0.06758195 | 1.51666    |
| 0.7048744    | 0.04688825 | 0.1449341  | 0.1933828  | 0.1767443   | 0.100976   |            |
| 1.5335240    | 0.3093026  | 0.2723565  | 0.04513869 | 0.08362098  | 0.1113236  |            |
| 0.4735962    | 0.05352729 | 0.0651553  | 0.3414004  | 0.08274936  | 0.6684419  | 0          |
| 0.1938254    | 0.3621104  | 0.1612669  | 0.2473016  | 0.1975944   | 0.1019609  |            |
| 0.5942469    | 0.5583308  | 0          | 0.1662206  | 1.4195660   | 0.1291513  | 0.6166032  |
| 0.3666712    | 0.03394902 | 0.1789522  | 0.3024292  | 1.0175190   | 0.09528108 |            |
| 0.1329359    | 0.2596614  | 0.1936285  | 0.04618709 | 0.1431429   | 0          | 0.06748769 |
| 0            | 0.1026150  | 0.07272847 | 0.1045865  | 0.7211473   | 0.1961703  | 0.1577892  |
| 0.3635761    | 0.05972927 | 0.9941381  | 0.07060604 | 0.1516886   | 0.9667053  |            |
| 0.03436696   | 0.06333596 | 0          | 0.9306886  | 0.4107560   | 0.02614662 | 0          |
| 0.08304692   |            |            |            |             |            |            |
| 0.3098895    | 0.1958175  | 0.9049167  | 0.2974713  | 0.2176699   | 0.06562659 |            |
| 0.06917059   | 0.07033237 | 0.07251607 | 0          | 0           | 0          | 0.1753983  |
| 0.4462070    |            |            |            |             |            |            |
| 0.03176036   | 1.3064940  | 0.1215796  | 0.1561990  | 0.2781638   | 0.2654828  | 0.06847454 |
| 0.04431197   | 0.2223862  | 0.8016780  | 0.07866656 | 0.5338328   | 0.4626396  | 1.063228   |
| 5.0038610    | 0.0587377  | 0.5715198  | 0.3230698  | 0.05652882  | 0.0786893  | 0          |
| 0.6693604    | 0          | 0.1693366  |            |             |            |            |
| TCGA-E7-A5KF | 20         | 0          | 0.4463328  | 0.4483728   | 0.0490506  | 0.3127656  |
| 0.04151252   | 47.993990  | 0.3440582  | 0.1974650  | 0.4655045   | 0.1737451  |            |
| 0.01347393   | 0.5800767  | 0.5264765  | 0.07308988 | 0.004795296 | 0.09605402 |            |
| 0.5519531    | 0.1178420  | 0.04834988 | 0.2441744  | 0           | 2.29839872 | 4.79010    |
| 0.09340318   |            |            |            |             |            |            |
| 0.05816159   | 0.06226878 | 0.1456617  | 0          | 1.4677640   | 0.06765004 | 0          |
| 0.6880282    | 0.07565596 | 0.2451424  | 0.2343640  | 0.2198142   | 0.04492688 |            |
| 0.01887057   | 0.08113631 | 0.4626461  | 0.2794723  | 0           | 15.642270  | 0.04290556 |
| 0.4075174    | 0.0503821  | 0.3269111  | 0.9166331  | 4.6799910   | 0.2518792  | 3.397348   |
| 0.0239137    | 0.3605035  | 0.5218717  | 0.2427694  | 0.01326     | 0.8435114  | 0          |
| 0.4099978    | 0.2718253  | 0          | 0          | 0.07935552  | 0.5676596  | 0.7847294  |
| 0            |            |            |            |             |            |            |
| 0.005997119  | 0.3116734  | 0.1361214  | 0.4950642  | 2.42369311  | 0.083840   | 0.1790020  |
| 0            | 0.09227964 | 0          | 0          | 0.3607295   | 0.3085059  | 0.5130631  |
| 0            |            |            |            |             |            | 0.1049455  |
| 0.07999003   | 0.1720070  | 0.4192084  | 0.2950582  | 0           | 0.1218991  | 0.2745429  |

|              |             |             |             |             |              |             |             |   |
|--------------|-------------|-------------|-------------|-------------|--------------|-------------|-------------|---|
| 0.1268718    | 0.008279804 | 0.6114283   | 0           | 0           | 0.1893122    | 2.0111810   | 0           | 0 |
| 0            | 2.4645640   | 0.5550131   | 0.3512598   | 0.2103301   | 0.6106306    | 0.2141172   |             |   |
| 0.8402135    | 0.1869798   | 0.07958002  | 0.1023779   | 1.8140780   | 0.08962049   |             |             |   |
| 0.2261649    | 0.01436613  | 0.1822212   | 0.2785301   | 0.2900383   | 0.009156008  |             |             |   |
| 1.0064670    | 0.03201801  | 0.2262472   | 1.1421920   | 0.1746503   | 0.4946629    | 0           |             |   |
| 0.4545139    | 0.02853986  | 0.06825191  | 0.2147432   | 0           | 0.8559127    | 1.519631    |             |   |
| 0.1110879    | 0           | 0.3681791   | 0.0931009   | 0.9554008   | 1.3460890    | 0           | 0           | 0 |
| 0.5316081    | 2.29997     | 0.3087128   | 0           | 2.3050290   | 0.09963005   | 0.5163519   |             |   |
| 0.1927516    | 0.2427694   | 0           | 0.2862505   | 1.0168280   | 0.1982303    | 0.2144593   |             |   |
| 0.03406534   | 0.5604191   | 0.8182211   | 0.06627918  | 0.9807333   | 1.6552050    |             |             |   |
| 0.2209538    | 0           | 0.4727492   | 0.1131492   | 0.1377292   | 0.006808231  | 0.1249432   |             |   |
| 0.06892645   | 0.2464084   | 0.2829017   | 0.8505005   | 0.3886210   | 0.1960353    |             |             |   |
| 0.2784579    | 0.1286234   | 0.7402338   | 0.08430235  | 0.06886458  | 0.05856118   | 0           |             |   |
| 0.9214007    | 0.0931009   | 0.5718662   | 0.03588173  | 0.5875946   | 0.365972     |             |             |   |
| 0.1792410    | 0.2909267   | 0.03512598  | 0.1775813   | 0.2046517   | 0.3173073    |             |             |   |
| 0.4034454    | 0.2884028   | 0.08202921  | 0           | 0.3253705   | 0.4430743    | 0.03843444  |             |   |
| 0.1105406    | 0.1253839   | 0.5874583   | 0.6253952   | 2.34058     | 0.2272667    |             |             |   |
| 0.2424771    | 0.0106608   | 0.1002026   | 0.1439467   | 0.03632346  | 0.1673541    | 0           |             |   |
| 0.01413322   | 0.3000675   | 0.08290541  | 0.04252502  | 0           | 0            | 0.8355266   |             |   |
| 0.8541075    | 0           | 0.1464029   | 0           | 0.1949559   | 0            | 0.1002273   | 0.08727547  |   |
| 0.1510141    | 0.009921772 | 0.008426531 | 2.0436410   | 0.1234156   | 0.08951592   |             |             |   |
| 0.1022869    | 0.1927516   | 0.05637266  | 0.3096379   | 0.5892531   | 0.1447456    | 0           |             |   |
| 0.3450681    | 0.1032969   | 0.1940051   | 0.6028032   | 0           | 2.9592276    | 8.19378     |             |   |
| 0.2261545    | 0.02157344  | 0           | 0.4182290   | 0.05821834  | 0.1542530    | 0.3730280   | 0.06624796  |   |
| 0.09419836   |             |             |             |             |              |             |             |   |
| TCGA-UY-A78L | 1127        | 0           | 0.037275353 | 0.079723153 | 0            | 0.206874562 | 0.019067984 |   |
| 35.096243376 | 0           | 0.189643852 | 0.1133772   | 0           | 0.012277921  | 0.425802516 |             |   |
| 0.066611784  | 0.391529264 | 0.040286929 | 0.147576039 | 0.088241153 | 0.104908602  |             |             |   |
| 0.216513879  | 0.088834371 | 0.040784298 | 0.102138069 | 2.507347169 | 23.087394876 |             |             |   |
| 0.137289482  | 1.309055387 | 0.114407902 | 0.089209199 | 0           | 0.791048922  | 0.12349638  |             |   |
| 0.031073751  | 0.053390354 | 0.447712836 | 0.104253354 | 0.119225077 | 0.574136599  |             |             |   |
| 0.113588361  | 0.082545212 | 0.242699347 | 0.071724111 | 0.077275513 | 1.508350445  | 0           |             |   |
| 1.26741236   | 0.039415698 | 0.023398163 | 0.007714018 | 0.400427657 | 0.485812966  |             |             |   |
| 1.412034369  | 0.066111883 | 0.574526638 | 0.746932387 | 0.198708461 | 0.295029901  |             |             |   |
| 0.031860428  | 0.031007346 | 0.774901669 | 0.044047042 | 0.041849921 | 0.110984673  |             |             |   |
| 0.026695177  | 0.043020817 | 0.102723965 | 0.074498169 | 0.432540513 | 0.280937855  |             |             |   |
| 0.071621207  | 0.06658661  | 0.04607087  | 0.118247093 | 0.35495785  | 0.953399183  |             |             |   |
| 0.023491756  | 0.048323689 | 0.020746325 | 0.042386889 | 0.040942255 | 0            | 0.073641868 |             |   |
| 0.094470868  | 0.134666116 | 0.057018825 | 0.096409395 | 0.047548328 | 0.079008148  |             |             |   |
| 0.096277688  | 0.135529361 | 0           | 0           | 0.072060601 | 0.097126885  | 0.012677232 |             |   |
| 0.162365187  | 0           | 0           | 0.139131128 | 0.47618424  | 0.131418326  | 0           | 0           | 0 |
| 0.740978281  | 0.708151805 | 0.290420059 | 0.1169503   | 0.240412706 | 0            | 0.503394768 |             |   |
| 0.049077484  | 0           | 0.094050624 | 2.575537725 | 0.04116546  | 0.207769067  | 0.017596821 |             |   |
| 0            | 0.511749868 | 0.099917676 | 0.428975014 | 0.308200879 | 0.06776468   | 0.029413718 |             |   |

|              |             |             |             |             |             |             |                 |
|--------------|-------------|-------------|-------------|-------------|-------------|-------------|-----------------|
| 0.118311475  | 0.906699349 | 0.040111137 | 1.272397978 | 0.120128297 | 0.971668972 |             |                 |
| 0.078655433  | 0.125400832 | 0.108842112 | 0.097882316 | 0.582440228 | 0.144416532 |             |                 |
| 0.04279608   | 0           | 0.215238601 | 0.085528237 | 0.29256338  | 0.251697384 | 0           |                 |
| 0.027147638  | 0.030856072 | 0.037889929 | 0.187833869 | 0.170394748 | 0.070900672 |             |                 |
| 0.056200373  | 0.423508476 | 0.091526322 | 0.135529361 | 0.177073537 | 0.063720857 |             |                 |
| 0.032809715  | 0.262967416 | 0.521011383 | 0.113816647 | 0.05629015  | 0.25035619  |             |                 |
| 0.514835559  | 0.15251243  | 0.254623179 | 0.400427657 | 0.561951008 | 0           | 0.111639969 |                 |
| 0.108090901  | 0.442812218 | 0.2338781   | 0.031631628 | 0.075053533 | 0.06886834  |             |                 |
| 0.221620338  | 0           | 0.080655825 | 0.507859467 | 0.294377673 | 0.120060081 | 0.031976074 |                 |
| 0.11177426   | 0.628507503 | 1.200402909 | 0.031631628 | 0.053797914 | 0.179783846 |             |                 |
| 0.094050624  | 0.384877068 | 0.542718608 | 0.032963175 | 0.333610734 | 0.276623937 |             |                 |
| 0.46654188   | 0.020558713 | 0.096806686 | 2.254259401 | 0.10743181  | 0.061663056 |             |                 |
| 0.15751769   | 0.044157436 | 0.104844657 | 0           | 0.332117189 | 0.058147911 | 0.105924751 |                 |
| 0.253873442  | 0.274323085 | 0.380947392 | 0.268112431 | 0.673943816 | 0.162385409 |             |                 |
| 0.466723626  | 0.07834938  | 0.036820934 | 0.261883813 | 0.066737943 | 0.061496743 |             |                 |
| 0.046365308  | 0.132433259 | 0.152493089 | 0.203098754 | 0.117198339 | 0           | 0.03343229  |                 |
| 0.422513595  | 0.911251963 | 0.096277688 | 0.038427082 | 0.031860428 | 0.067161945 | 0           |                 |
| 0.070410273  | 0.040088321 | 0           | 0.072918021 | 0.185787173 | 0.541561995 | 0.09070176  |                 |
| 0.082234851  | 0           | 0.118049024 | 0.136866728 | 0.152282664 | 0.14177541  | 0.022162034 |                 |
| 0.021512597  | 0.215928134 | 0.094894885 | 0.050921436 | 1.337913679 | 0.174690819 |             |                 |
| 0.619411532  | 2.361068375 | 0.081474298 | 0.158549533 | 0.104562712 | 0.10977456  | 0           |                 |
| 0.047235434  | 0.307236244 | 0.00869421  | 0.0605755   |             |             |             |                 |
| TCGA-S5-A6DX | 56          | 1           | 0.05792656  | 0.1445397   | 0.1400509   | 0.1607434   | 0               |
| 95.4209      | 0.4709083   |             | 0.2385747   | 0.1057141   | 0.1329124   | 0           | 1.1733720       |
| 1.6463760    | 0.2053753   |             | 0.3199661   | 0.02717164  | 0.2102915   |             | 0.2300836       |
| 0.9506928    | 0           | 2.69218     | 72.857370   | 0.05333757  | 0.1660649   | 0.1777919   | 0 0             |
| 3.3805861    | 1.2154650   | 0.04828916  | 0           | 0.04092669  | 0.1465819   | 0.04117286  | 1.2268          |
| 0.4314892    | 0.3848301   |             | 0.06285984  | 0.04371001  | 0.1350984   |             | 0.2493620       |
| 15.229580    | 1.225054    |             | 0.07272232  | 0.09590176  | 1.4778950   | 0.3019848   | 7.385382        |
| 0.1027390    | 0.09920273  |             | 0.2560469   | 0           | 1.1032220   | 0.04951167  | 0.1479997       |
| 5.4506390    | 0.06503552  |             | 1.5953670   | 0.04148478  | 0.02228504  | 0.04119609  | 0               |
| 0.3584936    | 0.3742135   |             | 0.05136952  | 0.06208606  | 0.03068355  |             | 0.1837581       |
| 0.3510250    | 0.5333757   | 0           | 0.2553259   | 0.09672047  | 0.1097833   |             | 0.1060416       |
| 0.3056773    | 0.2002713   |             | 0.1468094   | 0.2092735   | 0.1181443   |             | 0.03745548      |
| 0.1612166    | 0.4911202   | 0           | 0.07020501  | 0           | 0           | 0           | 0.07486244      |
| 0.02727766   | 0.09956346  |             | 0.3093780   | 0.3035287   | 0.1479997   | 0.04084528  | 0 0             |
| 0.3265071    | 5.949382    | 0.8363651   |             | 0.3510250   | 0.02370559  | 1.0496540   | 0.1912251       |
| 0.07626728   | 0           | 0           | 4.7364410   | 0.2583014   | 0.01367289  |             | 0.3251776       |
| 0.2840244    | 0.2587897   |             | 0.4052094   | 0           | 0.2106150   | 0.05466052  | 1.1848630       |
| 0.5447743    | 0.1244543   |             | 0.9824036   | 0           | 1.3641260   | 0.2748567   | 0.07605542      |
| 1.01072      | 1.6457890   | 0.07673753  | 0           | 0           | 0           | 0.1010332   | 0.7720080 0 0 0 |
| 0.7589326    | 2.0124530   | 0.05509045  |             | 0.1310046   | 0.04029426  | 0           | 0.3685763       |
| 0.06879385   | 0.2475583   |             | 0.1019738   | 1.0625060   | 0.4120168   | 0.2829969   | 0               |
| 0.2917935    | 0.9778554   |             | 0.2200779   | 0.6795527   | 0           | 0.9760208   | 0               |

|              |            |             |            |            |            |             |
|--------------|------------|-------------|------------|------------|------------|-------------|
| 0.1734905    | 0          | 0.6749046   | 0.2826839  | 0          | 0.04859771 | 0.07134841  |
| 0.07380041   | 0          | 0.4038752   | 0.3035471  | 0.8370693  | 0.1399316  | 0           |
| 0.1240708    | 1.9614290  | 0.5415815   | 0.04915611 | 0          | 1.5831950  | 0.5316496   |
| 0.5532667    | 0.1536761  | 0.1440103   | 0.1984055  | 0.1705916  | 0.0159743  | 0           |
| 0.3918007    | 0.1252132  | 0.02613422  | 0.2159870  | 0.1349268  | 0          | 0.6193392   |
| 0.4518144    | 0          | 0           | 0.3674213  | 0.04933325 | 0.6547380  | 0.5485965   |
| 0.3626484    | 0.1065368  | 0.02861019  | 0.9307975  | 0          | 0          | 0.07205251  |
| 0.1372024    | 0.2187480  | 0           | 0.06265435 | 0.1558631  | 0.2298078  | 0.3219768   |
| 0.07480861   | 0          | 0.04951167  | 0.1043708  | 0          | 0.01683366 | 0.2180429   |
| 0.07082243   | 0.3368360  | 0.7854904   | 0          | 0.1118201  | 0          | 0.1987378   |
| 0.2098594    | 0.02002923 | 0.6888038   | 0          | 0.06425543 | 0          | 0.03956641  |
| 0.9500713    | 0.0775636  | 0.5882412   | 2.8863920  | 0.0253225  | 0.8931593  |             |
| 0.08124615   | 0.1705916  | 0.1187335   | 0.03670235 | 0.4407236  | 0.168887   |             |
| 0.0941354    |            |             |            |            |            |             |
| TCGA-XF-A8HI | 544        | 1           | 0.5955177  | 0.3442355  | 0.2918518  | 0.5955072   |
| 0.09880006   | 61.7325    | 0           | 0.2924502  | 0.2056109  | 0.8863228  | 0.3021836   |
| 0.1859945    | 0.8197231  | 2.530170    | 0.3566065  | 0.09415587 | 0.07620305 | 0.007549723 |
| 0.2804647    | 0.1054836  | 0.2113223   | 0.06615308 | 4.56456386 | 3.75960    | 0.07410004  |
| 0.2249405    | 0          | 0.3466756   | 0          | 2.0959730  | 0.3220150  | 0.06916004  |
| 0.1286155    | 0.4118402  | 0.6507523   | 0.4822872  | 0.07128416 | 0.02245603 |             |
| 0.0819785    | 0.2502501  | 0.2494297   | 0          | 19.7474    | 0.4084620  | 0.2424734   |
| 0.01998495   | 1.2967510  | 0.7551666   | 5.1119280  | 0.6422931  | 1.81921    | 0.2276590   |
| 1.1704010    | 0.2476255  | 0.02582091  | 1.1094420  | 0.3794767  | 0.2515901  | 0           |
| 0.009287949  | 0.2918848  | 0.4342607   | 0.8591239  | 0.4159055  | 0.04281954 |             |
| 0.4053939    | 0.3410207  | 0.5302151   | 1.7974015  | 6.316030   | 0.1825825  | 0           |
| 0.04031112   | 0.8602023  | 0.0353568   | 0.03640002 | 0.3338761  | 0.4894973  |             |
| 0.6105466    | 0          | 0.2185495   | 0.2407706  | 0          | 0.2078581  | 1.118810    |
| 0.4013828    | 0.02516297 | 0.01313732  | 1.1766680  | 0.2074801  | 0.06447122 |             |
| 0.3535197    | 1.8998450  | 0.003782996 | 0          | 0          | 0.07776086 | 5.3324331   |
| 0.2926002    | 0.3029868  | 0.7118226   | 0.4004002  | 1.5649930  | 0.3496531  | 0           |
| 0.2436599    | 2.7590550  | 0.2666216   | 0.9150656  | 0.01139716 | 0.1084219  |             |
| 0.3788019    | 0.5608631  | 0.05811028  | 1.1976990  | 0.3048122  | 0.4721961  |             |
| 2.1087750    | 0.2857723  | 0.4204645   | 0.1556101  | 0.9199894  | 0.06792504 |             |
| 0.08121998   | 0.1498022  | 0           | 0.8173459  | 0.5612167  | 0.3923204  | 0.08452894  |
| 1.2347420    | 0.6093471  | 1.13693     | 1.5309710  | 0          | 0.0399699  | 0           |
| 0.6326153    |            |             |            |            |            |             |
| 2.1189460    | 0.3673692  | 0.03640002  | 0.9180626  | 0.05928003 | 0.6583504  |             |
| 0.2867188    | 0.1238127  | 0           | 0.4768946  | 2.1484990  | 0.05897368 | 0.3645817   |
| 0.9323707    | 2.0007010  | 0.7761262   | 0.1577449  | 1.4264261  | 2.845860   | 0.2270927   |
| 0.1840549    | 0.1680207  | 1.2575160   | 0.06732393 | 0.4097453  | 0.1053236  |             |
| 0.02973656   | 0.1845510  | 0.04887112  | 0.5223941  | 4.675420   | 0.1947201  | 0.5054456   |
| 1.15978      | 0.3888607  | 1.0010010   | 0.05016003 | 0.1229236  | 0.2090639  | 0           |
| 1.66501      |            |             |            |            |            |             |
| 0.4431614    | 1.3891660  | 0.06404905  | 1.0113460  | 0.5181991  | 0.1599730  | 0.479359    |
| 0.2090001    | 0.1344779  | 0.3131179   | 0.6099638  | 0.6901455  | 0.5720003  |             |
| 0.09973707   | 0          | 0.4517239   | 0.07532282 | 0.0457371  | 0.2630872  | 0.2552229   |

|              |            |            |            |            |            |            |
|--------------|------------|------------|------------|------------|------------|------------|
| 0.2056109    | 1.7861331  | 7.460080   | 3.004979   | 0.7969435  | 0.1649231  | 0.2384829  |
| 0.7993862    | 0.7780504  | 0.1991519  | 0          | 0.1009115  | 0.3570813  | 0.09865769 |
| 0.05060491   | 0          | 0.04330705 | 1.204081   | 1.2624120  | 0.3982170  | 0.04127091 |
| 0.4059967    | 0.3538421  | 0.1543504  | 0.1038581  | 0.0898536  | 0.04722776 | 0          |
| 4.2091250    | 1.468649   | 0.1997329  | 0.06086084 | 0.2166320  | 1.437507   | 0.4131331  |
| 1.2688620    | 1.148318   | 0.08360005 | 0.6427285  | 0.08194906 | 0.1649047  |            |
| 0.6656893    | 0.09698079 | 3.61064    | 6.8645150  | 5.804646   | 0.1540347  | 0          |
| 0.3554955    | 0.02969143 | 0.03059358 | 1.8215390  | 0.04483853 |            |            |
| TCGA-XF-A9T5 | 2027       | 0          | 0.05106004 | 0.2002098  | 0.06172476 | 0.2046621  |
| 0.02611946   | 80.279360  | 0.1855539  | 0.1863659  | 0          | 0.1177287  | 0.2984158  |
| 0.1368679    | 0.8518017  | 0.1839511  | 0.06939502 | 0.2014556  | 0.06386869 |            |
| 0.1112183    | 0.09126446 | 0.05586662 | 0.06995473 | 1.1346046  | 7.617480   | 1.567168   |
| 0.4574371    | 1.3320920  | 0          | 2.7335880  | 3.947212   | 0.08513009 | 0          |
| 0.1156057    | 0.1088769  | 0.2949211  | 0.06915295 | 0.1381979  | 0.07123956 |            |
| 0.06935167   | 0.01323157 | 0.04396062 | 0          | 3.3255070  | 0.3525607  | 0.02113343 |
| 0.3428179    | 0.3549174  | 7.2388710  | 0.09056053 | 0.3060519  | 0.2256956  | 0          |
| 0.5430551    | 0.1309279  | 0.01820318 | 2.1787980  | 0          | 0.3800690  | 0          |
| 0.2723458    | 0.2551203  | 0.2764986  | 0.5497581  | 0.0679204  | 0.07296865 |            |
| 0.0631082    | 0.06229835 | 0.2210108  | 0.6268670  | 1.608959   | 0.05295531 |            |
| 0.01420923   | 0.01935395 | 0.1869433  | 0.1154755  | 0.1513127  | 0.1941103  |            |
| 0.1537222    | 0.07810479 | 0.1650778  | 0.1184219  | 0.1082259  | 0.04396062 |            |
| 0.1856491    | 0          | 0          | 0.03948365 | 0.1862631  | 0.01389229 | 0.3546522  |
| 0.08776138   | 0.2727049  | 0.2162382  | 1.6698380  | 0.03600355 | 0.03492674 | 0          |
| 0.2055739    | 1.2969410  | 3.880126   | 0.1326065  | 0.02089557 | 0.4861376  |            |
| 0.3464265    | 0.3064683  | 0.06722669 | 0          | 0.04294374 | 3.7477260  | 0.2276828  |
| 0.01807819   | 0.05732632 | 0.9012839  | 0.2737359  | 0.2112334  | 0.7036263  | 0          |
| 0.04029112   | 0.1095026  | 1.0020710  | 0.09615291 | 0.4979828  | 0          | 2.261095   |
| 0.1436570    | 0.08588748 | 0.1397744  | 0.06703995 | 1.4095010  | 1.978228   | 0.1262636  |
| 0            | 0.08423868 | 0.05857859 | 0.04452838 | 1.9037680  | 0          | 0          |
| 0.5601790    | 0.09712024 | 0.03849184 | 0.2959821  | 0.2507468  | 0          | 0.1819174  |
| 0            | 0.7204293  | 0.5405426  | 0          | 0.11566    | 0.4286746  | 0.7835838  |
| 0.2274682    | 0.1371272  | 0.1358408  | 0          | 0.09731605 | 0.02961274 | 0.5132493  |
| 0.07119286   | 0          | 0.1884829  | 0          | 1.0191520  | 0.1595864  | 0.2675652  |
| 0.2573876    | 0.2466887  | 0.1752042  | 0.06999277 | 0.5645469  | 0.2121704  | 0          |
| 0.1105391    | 0.4104486  | 0.3864936  | 0.3514716  | 0.3449468  | 0          | 0.2602261  |
| 0.1165912    | 0.3195362  | 0.1548881  | 0.08840432 | 0.3859876  | 0.1471609  |            |
| 0.3609023    | 0.1903843  | 0.3629230  | 1.952293   | 0.04249011 | 0.1137341  |            |
| 0.07965142   | 0.04836549 | 0.2086546  | 0.2221401  | 0.1739415  | 0.5771265  |            |
| 0.7033699    | 0.2224367  | 0.9299220  | 0.08049265 | 0.1260939  | 0.7742892  |            |
| 0.09141811   | 0.04211934 | 0          | 0.04268424 | 0.3374314  | 0.06955153 | 0          |
| 0.1831832    | 0.2507969  | 1.0564050  | 0.06594093 | 0.1315942  | 0          | 0          |
| 0.08161026   | 0.3020230  | 0          | 0.4453620  | 3.956456   | 0          | 0.02816147 |
| 1.673317     |            |            |            |            |            |            |
| 0.1482290    | 0.07093876 | 0.2479560  | 0.2824799  | 0.06071542 | 0          | 0.2769003  |
| 0.1733169    | 0.1046288  | 0.3216299  | 0          | 1.8854982  | 0.0411450  | 0.08370305 |



|              |            |            |             |            |            |            |            |
|--------------|------------|------------|-------------|------------|------------|------------|------------|
| 0.5701035    | 0          | 0.07518499 | 0.1883863   | 0          | 0.7284018  | 0          | 0.05926911 |
| TCGA-XF-A9SX | 719        | 1          | 0.04559388  | 0.02437863 | 0.2480260  | 0.1054340  | 87.7401    |
| 0.3971260    | 2.485345   | 0.2496221  | 0           | 0.02252687 | 2.1029880  | 2.444314   |            |
| 1.3099450    | 0.03695815 | 0.1616505  | 0.05396671  | 0.06416022 | 0.3475920  | 0.05432951 |            |
| 0.2244865    | 0.09369872 | 1.4939536  | 2.453130    | 0.04198189 | 0.1960640  | 0.7346832  |            |
| 0.08183812   | 0          | 0.5277724  | 0.8308099   | 0          | 0          | 0.09663994 | 0.07286798 |
| 1.1850690    | 0.05789051 | 0.3617961  | 0.1802371   | 0.03870457 | 0.01772262 |            |            |
| 0.2944085    | 0.1582026  | 2.4891390  | 0.08585939  | 0.2972186  | 0.3673416  |            |            |
| 0.2971145    | 7.4918350  | 0.4099319  | 0.2015340   | 0.4059788  | 0          | 0.04876338 |            |
| 0.4489730    | 0.1535680  | 0.1527215  | 0.1469366   | 0.1249761  | 0.1276749  | 0          |            |
| 0.4232545    | 0.1472713  | 0.08086569 | 0.1099526   | 0.02415096 | 0.08344362 | 0          |            |
| 0.5597586    | 0.08620282 | 0.2305204  | 0           | 0.02592306 | 0.02503955 | 0          |            |
| 0.1351141    | 0          | 0.4117969  | 0           | 0          | 0.1031008  | 0.5798396  | 0.05888171 |
| 0.1657747    | 0.1130282  | 0          | 0.02644258  | 0.03564064 | 0.1535127  | 0.0724619  |            |
| 0            | 0          | 0.1178171  | 0.6989418   | 0.09644771 | 0.7485050  | 0          | 1.435035   |
| 0.5716827    | 0          | 0.04664655 | 0.2310505   | 0          | 0.3078672  | 0.04502237 | 0          |
| 2.2073940    | 0.9148885  | 0.07264283 | 0           | 0.1341330  | 0.1222157  | 0.7819161  | 0          |
| 0            | 0          | 0.02346719 | 0.6238362   | 0.03679688 | 1.2625510  | 0.07346832 | 1.775606   |
| 0.04810425   | 0          | 0.1747355  | 0           | 0.9973880  | 0.2649677  | 0.07247995 | 0          |
| 0.07846131   | 0.8349904  | 1.5661070  | 0.2988542   | 0.1132261  | 0          | 0          |            |
| 0.5627360    | 0.1546701  | 0.1268621  | 0           | 0.1243310  | 0.1753674  | 0          |            |
| 1.9299140    | 0.4525083  | 0.04176493 | 0.1032781   | 0.22967    | 0.5247737  | 0.05329935 |            |
| 0.7515326    | 0          | 0.1212985  | 0           | 0          | 0.03966388 | 0.3906     | 0          |
| 0.3213098    | 0.04211864 | 0.3194849  | 0           | 0.09865532 | 0.1433528  | 0.6090583  |            |
| 0.2753497    | 0          | 0.1171871  | 1.8904130   | 0.07104628 | 0.1160720  | 0.09870552 |            |
| 1.0995260    | 0.4707678  | 0.5257565  | 0           | 0.1700253  | 0.2889044  | 1.1329230  |            |
| 0.05920524   | 1.7414710  | 0.1478326  | 0.02057019  | 0.07650132 | 0          | 0.09017032 | 0          |
| 0.1218702    | 0.1066867  | 0.06478168 | 0           | 0.7480180  | 0.1747355  | 0.3513702  |            |
| 0.6476988    | 0.1489680  | 0.4281597  | 0.03593781  | 0.4728995  | 0.09990393 |            |            |
| 0.4897888    | 0.05641546 | 0          | 0.3716187   | 0.3443522  | 0          | 0.2867056  |            |
| 0.1479453    | 0.1226795  | 0.06460044 | 0.4118193   | 0.2649677  | 0.1762599  |            |            |
| 0.0584558    | 0.1232251  | 0          | 0.009937307 | 0          | 0          | 0.01672326 | 0          |
| 0            | 0.01886001 | 1.20684    | 0.0541475   | 0.03393456 | 0.1739661  | 0.09458978 |            |
| 0.1626468    | 0          | 0.1264383  | 0           | 0          | 1.8532410  | 0.2289381  | 1.7678318  |
| 0.0224227    | 1.4908530  | 0          | 0.1682189   | 0          | 0.2168079  | 0.05583084 |            |
| 0.06350896   |            |            |             |            |            |            |            |
| TCGA-G2-A2EK | 485        | 0          | 0.3433053   | 0.2723826  | 0          | 0.5326676  | 0.01699507 |
| 38.267970    | 0.2656145  | 0.2829450  | 0.8385337   | 0.3392383  | 0.9907052  |            |            |
| 0.8311845    | 0.8416228  | 0.4129337  | 0.05104259  | 0.02621611 | 0.181813   |            |            |
| 0.2170984    | 0.03299044 | 0.1454023  | 0.04551724  | 2.4299682  | 8.677930   | 0.01529557 |            |
| 0.1309613    | 0.1529557  | 0.2385334  | 0.8412562   | 2.69202    | 0.1467612  |            |            |
| 0.1661741    | 0.07137931 | 1.00934    | 0.7831813   | 0.2479492  | 0.7995646  | 0.35434    |            |
| 0.2084529    | 0.07725541 | 0.07646156 | 0.1119215   | 0.7436971  | 0          | 15.38524   |            |
| 0.2459153    | 0.1668361  | 0.09625582 | 0.4907328   | 0.5195994  | 3.827246   |            |            |

|              |             |            |            |            |            |            |
|--------------|-------------|------------|------------|------------|------------|------------|
| 0.2651614    | 1.7353450   | 0.07832144 | 0.4722842  | 0.7560007  | 0          | 0.169767   |
| 0.3998563    | 0.03925862  | 0.07460071 | 0.1483790  | 0.04758621 | 0.01118365 |            |
| 0.08269637   | 0.6307939   | 0.7453356  | 0.3577096  | 0.01473119 | 0.5519353  |            |
| 0.4927492    | 0.5269614   | 4.4579393  | 9.768480   | 0.2512552  | 0.0861407  | 0.2172688  |
| 0.3274175    | 0.08514651  | 0.02504537 | 0.2789536  | 0.2947028  | 0.3200703  | 0          |
| 0.08592859   | 0.3505922   | 0          | 0.1430187  | 0.3623873  | 0.2745358  | 0.03327002 |
| 0.3275566    | 0           | 0.1536674  | 1.0521120  | 0.4853793  | 0.3105202  | 0.5580269  |
| 1.8844140    | 0.007808776 | 0          | 0          | 0.8828174  | 3.59565    | 0.9846214  |
| 0.08628269   |             |            |            |            |            |            |
| 0.2447291    | 0.3163138   | 0.07513612 | 0.8574582  | 0.1749688  | 0.1954786  |            |
| 0.1117683    | 1.3106070   | 0.3302127  | 0.6666559  | 0          | 0.07460071 | 0.1954786  |
| 0.5640180    | 0.2174093   | 1.3276970  | 0.1811936  | 0.1048644  | 0.2536492  | 1.359129   |
| 0.1787530    | 0.5207481   | 0.03568966 | 0.5982266  | 0.02336823 | 1.4250460  | 0.1394515  |
| 0            | 0.7613794   | 0.3432448  | 0.2875445  | 0.1163218  | 0.1370284  | 0.6098427  |
| 2.2888791    | 0.0046310   | 0.03109594 | 0          | 0.02750166 | 0.06754172 | 0.9375194  |
| 1.30609      |             |            |            |            |            |            |
| 0.1579824    | 0.02504537  | 0.2465099  | 1.3052220  | 0.4831831  | 0.0394559  |            |
| 0.3407620    | 0.02924292  | 0.4218837  | 1.1787890  | 0.1623096  | 0.1003415  | 0.7252037  |
| 2.0394090    | 0.3592504   | 0.7054958  | 0.9814656  | 2.9462380  | 0.1171899  | 0.4703798  |
| 0.1156082    | 0.5161114   | 0.16213    | 0.2537362  | 0.06689435 | 0.4705920  | 0.2539641  |
| 0.2017574    | 0.3035255   | 0.9749370  | 0.2177158  | 0.4012806  | 1.0829970  | 0.2533273  |
| 0.8586389    | 0.2415915   | 0          | 0.1678231  | 0.2670655  | 0.5029575  | 0.1905758  |
| 0.6385089    | 0.1028289   | 0.7970456  | 0.6372414  | 0.4280535  | 0.1740756  |            |
| 0.1438045    | 0.03965517  | 0.1915055  | 0.4596619  | 0.5161533  | 0.5116412  |            |
| 0.09490695   | 0           | 0.9028373  | 0.2073063  | 0          | 0.4525490  | 0.3633744  |
| 0.4810066    |             |            |            |            |            |            |
| 1.3313791    | 1.1727530   | 0.3825067  | 0.5577986  | 0.0698319  | 0.1312723  | 1.1324050  |
| 0.1918397    | 0.04132487  | 0.1643250  | 0.2456931  | 0.2036470  | 0.06963836 | 0.107804   |
| 0.1489891    | 1.6255770   | 0.5693868  | 0.0429056  | 0.1712481  | 0.3123652  |            |
| 0.1197213    | 0.2434643   | 0.0386190  | 0.08932565 | 0.1236492  | 0.02437162 |            |
| 0.4277741    | 2.79959     | 0.1818932  | 0.05497123 | 0.1256276  | 0.4559349  |            |
| 0.08901808   | 0.2202375   | 0.9419772  | 0.3555498  | 0.09586965 | 0.3521504  |            |
| 0.02819291   | 0.1361571   | 0.5646450  | 0.1112142  | 0.7974408  | 4.6203120  | 0.1960662  |
| 0.07065669   | 0.04659777  | 0.3424428  | 0.1293866  | 0.0210502  | 0.4739472  |            |
| 0.2247224    | 0.06941603  |            |            |            |            |            |
| TCGA-XF-A8HD | 2964        | 0          | 0.05857076 | 0.1127421  | 0.1274476  | 0.08668319 |
| 0.05393074   | 36.820430   | 0.3150152  | 0.3634251  | 0.4838058  | 0.02315076 |            |
| 0.6861790    | 0.3768015   | 0.6513987  | 0.02532114 | 0.1723572  | 0.1663840  | 0.07143191 |
| 0.2296406    | 0.03489636  | 0.07690124 | 0.2407343  | 1.9721033  | 2.086810   | 0.2534745  |
| 0.1889007    | 0.5393074   | 0.1261570  | 0.2224643  | 1.3898720  | 0.03880997 | 0.08788713 |
| 0.05033535   | 1.7628660   | 0.1357310  | 0.1748491  | 0.7442661  | 0.2974690  | 0.05188131 |
| 0.09806232   | 0.04640592  | 0.1912412  | 0.2723060  | 0.1083893  | 3.9549210  | 0.03716033 |
| 0.1544152    | 0.02909048  | 1.3684921  | 0.6488532  | 0.7469190  | 0.09349343 | 0.8726618  |
| 0.08284622   | 0           | 0.4606831  | 0.03003737 | 0.06681852 | 0.5767593  | 0          |
| 0.1578211    | 0.5231706   | 0.02516768 | 0.04055916 | 0.2218088  | 0.1404708  |            |
| 0.4077905    | 0.4918876   | 0.04674672 | 0.1443860  | 0.0558446  | 0.1372074  |            |
| 0.3346471    | 1.6179220   | 0.8416071  | 0.2277930  | 0.04889805 | 0.1465255  | 0.02573302 |

|                                    |                           |                   |                            |                    |                   |                    |   |           |
|------------------------------------|---------------------------|-------------------|----------------------------|--------------------|-------------------|--------------------|---|-----------|
| 0.02649229                         | 0.2603553                 | 0.08906524        | 0.4020416                  | 0                  | 0.1136161         | 0.17116            |   |           |
| 0.2979492                          | 0.1210249                 | 0.4259145         | 0                          | 0                  | 0.1902244         | 0.05494157         |   |           |
| 0.02390368                         | 0.4633611                 | 0.06040242        | 0                          | 0.2774751          | 0.6644267         | 0.02202641         |   |           |
| 0                                  | 0                         | 0.1980829         | 0.9314393                  | 1.1483260          | 0.02876306        | 0.4856920.07947687 |   |           |
| 1.4343180.1619424                  | 0                         | 0.05911269        | 2.5205870.1940498          | 0.3917610.05391727 |                   |                    |   |           |
| 0.1578211                          | 0.3446196                 | 0.3768015         | 0.3964991.0654070.06388718 | 0.1109227          |                   |                    |   |           |
| 0.2532298                          | 1.0782360.1796259         | 0.5753142         | 0.2265091                  | 1.7548810.7168294  |                   |                    |   |           |
| 0.4137889                          | 0.1026142                 | 0.04614074        | 1.1073780.04538434         | 0.2203582          |                   |                    |   |           |
| 0.09228148                         | 0.3768563                 | 0.1612686         | 0.09194096                 | 1.7848730.09867723 | 0                 |                    |   |           |
| 0.08727145                         | 0                         | 0.3187548         | 0.9638685                  | 0.06684373         | 0.07947687        | 0.4359434          |   |           |
| 0.04314459                         | 0.2236051                 | 0.2504121         | 0.2102616                  | 0.06186468         | 0.2479204         |                    |   |           |
| 0.3836584                          | 0.02146081                | 0.1592077         | 0.6785885                  | 1.1864760.1129744  |                   |                    |   |           |
| 0.4122660.4089748                  | 0.4363027                 | 0.08264013        | 0.08611521                 | 0.04076237         |                   |                    |   |           |
| 0.4977580.1714966                  | 0.1491083                 | 0.2476564         | 0.01082128                 | 0.3283330          |                   |                    |   |           |
| 0.1858772                          | 0.4051382                 | 0.4015376         | 0.3112731                  | 0.1205856          | 0.1505408         |                    |   |           |
| 0.8111057                          | 0.2920557                 | 0                 | 0.2028784                  | 0.2824943          | 0.4137889         | 0.2419029          |   |           |
| 0.9905819                          | 0.03107702                | 0.4739664         | 0.5376399                  | 0.1681765          | 0.0678382         |                    |   |           |
| 0.2433797                          | 0.7130842                 | 0.2532114         | 0.06870464                 | 0.2576990.3746767  |                   |                    |   |           |
| 0.1374569                          | 0                         | 0.5009815         | 0.1644620                  | 0.1914774          | 0.2972059         | 0.1496456          |   |           |
| 0.4333217                          | 1.1497370.1421584         | 0.4300173         | 0.0830995                  | 0.1735702          |                   |                    |   |           |
| 0.4229059                          | 0.06291919                | 0.2898895         | 0                          | 0.1395443          | 0.3151824         | 0.07180404         |   |           |
| 0.1104922                          | 0.03801068                | 0.3782315         | 0.5510333                  | 0.7487822          | 0.136153          |                    |   |           |
| 0.1811414                          | 0.03003737                | 0.2321694         | 0.1287649                  | 0.1582941          | 0.2267668         | 0                  |   |           |
| 0.1117117                          | 0                         | 1.36153           | 0.02137795                 | 0.1066029          | 0.7087218         | 0.2225885          |   |           |
| 0.1673970.4307071                  | 0.4981985                 | 0.02089392        | 0.08112658                 | 0.4764468          |                   |                    |   |           |
| 1.0437580.1680271.2989480.09411143 | 1.3625945.1444590.1113779 | 0.4671166         |                            |                    |                   |                    |   |           |
| 0.09857963                         | 0.05174663                | 0.09364209        | 0.04453262                 | 0.6572967          | 0.01229509        |                    |   |           |
| 0.1060603                          |                           |                   |                            |                    |                   |                    |   |           |
| TCGA-GV-A3JX                       | 581                       | 0                 | 0.1179773                  | 0.1835095          | 0.4278565         | 0.3769846          | 0 |           |
| 30.165830                          | 0.09354189                | 0.3523171         | 0.2214809                  | 0.06358893         | 0.0427381         |                    |   |           |
| 0.2299940.7952080.09273386         | 0.04563076                | 0.07616871        | 0.07546321                 | 0.02336152         |                   |                    |   |           |
| 0.006390064                        | 0.1056136                 | 0.1322465         | 2.19582                    | 27.153880.2617022  | 0                 |                    |   |           |
| 0.09875554                         | 0.1925108                 | 0.06789443        | 1.10183                    | 0.07106707         | 0.2145799         | 0                  |   |           |
| 0.9547845                          | 0.2571150.1829576         | 0.2168197         | 0.2396732                  | 0.07125204         |                   |                    |   |           |
| 0.1047476                          | 0.1068275                 | 0.1000550.2216153 | 0.04961942                 | 6.9338990.06804632 |                   |                    |   |           |
| 0.04039403                         | 0.2996392                 | 0.9073165         | 2.3483491.4507970.1997345  | 0.9367464          |                   |                    |   |           |
| 0.1611858                          | 0                         | 0.3342495         | 0.02750154                 | 0.02102978         | 0.2464316         | 0.07604176         |   |           |
| 0                                  | 0.1437010                 | 0.01083106        | 0.1172734                  | 0.03215297         | 0.4729275         | 0.3117886          |   |           |
| 0.04755582                         | 0.3161222                 | 0.1079412         | 0.2355451.2534360.6583702  | 0.1216668          |                   |                    |   |           |
| 0.4338093                          | 0                         | 0.1097636         | 0.03534087                 | 0.02425575         | 0.2065920.3261845 |                    |   |           |
| 0.3874740.01640599                 | 0.2704632                 | 0.07089271        | 0.2727956                  | 0.05540383         |                   |                    |   |           |
| 0.6239324                          | 0                         | 0                 | 0.1119633                  | 0                  | 0.008754268       | 0.2878792          | 0 | 0.1718458 |
| 0.4526708                          | 1.6605880.007562582       | 0                 | 0                          | 0                  | 2.5228810.4156624 | 0                  |   |           |
| 0.2896829                          | 0.09881971                | 0.1212787         | 0.9945780.1694524          | 0.0315526          |                   |                    |   |           |

|              |            |            |            |             |             |            |           |         |
|--------------|------------|------------|------------|-------------|-------------|------------|-----------|---------|
| 0.1082445    | 1.5000650  | 0.07106707 | 0.4304251  | 0.01898671  | 0.1806218   |            |           |         |
| 0.0946578    | 0.5749850  | 0.06534461 | 0.1773569  | 0.05849366  | 0.1015583   |            |           |         |
| 0.1987298    | 0.9516338  | 0.06924691 | 1.17677    | 0.1382578   | 1.1621      | 0.09052591 |           |         |
| 0.2164890    | 0.2642378  | 0          | 0.3686873  | 0.4155288   | 0.2301713   | 0.02816362 |           |         |
| 0.5042909    | 0.1845674  | 0.8979101  | 0.3589549  | 0           | 0.04686703  | 0.07990378 |           |         |
| 0            | 0.5512623  | 0.6177474  | 0.1224012  | 0.04851149  | 1.0295570   | 0.2370133  |           |         |
| 0.1462342    | 0.1910597  | 0.5500308  | 0          | 0.8171652   | 0.7743886   | 0.2947355  |           |         |
| 0.1700615    | 0.2161045  | 0.6419110  | 0.1755292  | 0.04777993  | 0.6624851   |            |           |         |
| 0.5421364    | 0.2648221  | 0.2365354  | 0.1119633  | 0.2940233   | 0           | 0.3822566  |           |         |
| 0.07018409   | 0.2476930  | 0.3416072  | 0          | 0.1315066   | 0.3372140   | 0.2000388  |           |         |
| 0.3627205    | 0.3588178  | 0.1488583  | 0.7426301  | 0.6350741   | 0.08191213  |            |           |         |
| 0.06965658   | 0.2586455  | 0.1353056  | 0.1476539  | 0.8582338   | 0.02845342  |            |           |         |
| 0.8339097    | 0.6391916  | 0.02368902 | 0.1774604  | 0.1949789   | 0.3456444   |            |           |         |
| 0.1391008    | 0.1548416  | 0.3519156  | 0.07623234 | 0.1597902   | 0           | 0.2866796  |           |         |
| 0            | 0.5181202  | 0.08765621 | 0.09288542 | 0.1370122   | 0.4628629   | 1.357394   |           |         |
| 0.1201450    | 0.5035878  | 0.05072269 | 0.04767509 | 0.6804031   | 0.08641109  |            |           |         |
| 0.2388746    | 0          | 0.01793173 | 0.2531350  | 0.1095703   | 0.1011642   | 0.03480172 |           |         |
| 0.1442918    | 0.5531415  | 0.8991872  | 0          | 0.1658490   | 0.02750154  | 0.1352712  |           |         |
| 0.1768413    | 0.05610213 | 0.2595282  | 0.0598754  | 0.06294197  | 0.01336411  |            |           |         |
| 2.0257030    | 0.1370122  | 0.2484445  | 0.6083341  | 0.1188816   | 0.08940455  |            |           |         |
| 0.1810518    | 0.6452703  | 0.11478    | 0.03713883 | 0.3965672   | 0.3003445   |            |           |         |
| 0.04395478   | 0.6998060  | 0.5940763  | 5.02718    | 0.05626211  | 0.1539653   |            |           |         |
| 0.04512864   | 0.1895122  | 0.5408001  | 0          | 0.1020010   | 0.003752369 | 0.01493944 |           |         |
| TCGA-H4-A2HQ | 590        | 0          | 0.5077722  | 0.8720946   | 0.05580261  | 0.6120086  | 0         |         |
| 45.962510    | 0.1453842  | 0.1123234  | 0.4236664  | 0.1824570   | 0.1318265   |            |           |         |
| 0.8249081    | 1.6827590  | 0.1413567  | 0.0409154  | 0.03642541  | 0.2093105   | 0          |           |         |
| 0.03667028   | 0.02525326 | 0.2529718  | 3.275431   | 130.288     | 0.1912689   | 0.4962582  |           |         |
| 0.7792435    | 0.1104750  | 1.24679    | 0.05097855 | 0.4232928   | 0           | 2.3156     |           |         |
| 0.4426472    | 0.09843076 | 0.2666251  | 0.5235891  | 0.07382734  | 0.0500924   |            |           |         |
| 0.1027547    | 0.3110139  | 0.2781999  | 0          | 10.257280   | 0.3416817   | 0.202831   |           |         |
| 0.009552898  | 0.7438234  | 1.8048662  | 6.5558     | 0.4093587   | 1.3439130   | 0.1496303  | 0         |         |
| 1.0618260    | 0.8285627  | 0.0137139  | 1.0606370  | 0.05454705  | 0.1554785   | 0.2405224  |           |         |
| 0            | 0.05105635 | 0.2831481  | 0.6458001  | 0.1785501   | 0           | 0.02729058 |           |         |
| 0.3545764    | 0.2200628  | 0.4956262  | 2.4775955  | 4.783180    | 0.1163670   | 0.0359059  |           |         |
| 0.0385378    | 0.4024321  | 0.05070214 | 0.27839    | 0.3191886   | 0.2924775   |            |           |         |
| 0.3335361    | 0.4942775  | 0.5074144  | 0.1498839  | 0.6848957   | 0.03974284  |            |           |         |
| 1.1189140    | 0.07628958 | 0          | 0.3123348  | 0.02405603  | 0.01569925  | 0.7825429  | 0         |         |
| 0            | 0.6129812  | 2.26444    | 0.02893263 | 0           | 0           | 0.1858502  | 2.1410991 | 0.87433 |
| 0.07992241   | 0.1826106  | 0.6805090  | 0.2435913  | 1.1913770   | 0.3950483   | 0          |           |         |
| 0.4270587    | 1.7768490  | 0.2039142  | 0.7204327  | 0.005447895 | 0.4664356   |            |           |         |
| 0.3621381    | 0.6186811  | 0.06944245 | 1.0813990  | 0.2549779   | 0.5108217   |            |           |         |
| 1.8628930    | 0.2111098  | 0.6592274  | 0.1487647  | 0.8360256   | 0.06493696  |            |           |         |
| 0.3105882    | 0.2695761  | 0.1818235  | 0.9977752  | 0.5365283   | 0.1793774   | 0          |           |         |
| 0.1523129    | 0.4236664  | 0.8051225  | 0.9621964  | 0.04320558  | 0           | 0.03821159 |           |         |

|              |            |            |            |            |            |            |
|--------------|------------|------------|------------|------------|------------|------------|
| 0.09384438   | 0.6513081  | 1.2660820  | 1.1756042  | 0.1739938  | 0.4602449  | 0.1700168  |
| 1.0070220    | 1.1096423  | 0.4340091  | 0.04063095 | 0.7164388  | 2.7564630  |            |
| 0.2091261    | 0.5425639  | 1.8418480  | 0.5216371  | 0.09596716 | 1.0330881  | 1.964922   |
| 0.2171027    | 0.2890742  | 0.02677156 | 0.6010984  | 0.03218115 | 0.6267524  |            |
| 0.06970869   | 0.1563564  | 0.1960361  | 0.7475398  | 0.1886673  | 0.6289238  |            |
| 0.4421161    | 0.6318908  | 0.6731759  | 0.2451997  | 0.28071    | 0.3356741  |            |
| 0.2350322    | 0.1998670  | 0.07421367 | 1.1647060  | 0.1059166  | 1.0430880  | 1.1428735  |
| 1.4545880    | 0.6271593  | 0.0679714  | 0.3309739  | 0.3596509  | 0.5693463  |            |
| 0.4656455    | 0.4095801  | 0.8319034  | 0.2187350  | 0.1298377  | 0          | 0.3495946  |
| 0.1440186    | 0.08745018 | 0.3143922  | 0.9440745  | 0.2751923  | 0.664051   |            |
| 2.6230270    | 0.4309181  | 1.3530030  | 0.1334113  | 0.02279918 | 0.4752296  | 0.2479411  |
| 0.6473297    | 0          | 0.01607872 | 0.2396874  | 0.1571961  | 0.1451363  | 0.09985729 |
| 0.04140193   | 2.3632690  | 0.8101282  | 0.05961426 | 0.4758739  | 0.1183661  |            |
| 0.1386202    | 0.2537072  | 0.2079260  | 0.1737562  | 0.08590086 | 0          | 0.7956775  |
| 2.1908240    | 0.1965659  | 0.1782167  | 0.1163670  | 0.2923795  | 0.1053607  | 0.5977759  |
| 1.02151      | 0.2744506  | 0.1065632  | 1.0809850  | 0.03917203 | 0.3153009  | 0.4169551  |
| 0.09271453   | 4.0057993  | 0.3657380  | 0.1967477  | 0.09817241 | 0.1942328  | 1.155514   |
| 0.06623232   | 0.02924775 | 0.8780209  | 0.01076675 | 0.01071651 |            |            |
| TCGA-XF-A9SP | 454        | 1          | 0.0507842  | 0.07241025 | 0.0613913  | 0.17224    |
| 59.180610    | 0.3538673  |            | 0.2952824  | 0.5251840  | 0.01672752 | 3.6223540  |
| 0.9413332    | 0.07318292 | 0.4081190  | 0.1202204  | 0.2382137  | 1.17992    | 0.01008571 |
| 0.1944768    | 0.2783072  | 1.5530874  | 8.847570   | 0.07793505 | 0.1637877  | 0.1558701  |
| 0.06076961   | 5.4651961  | 1.1512121  | 0.23385    | 0.04233509 | 0          | 0.4664454  |
| 0.1082887    | 1.2221990  | 0.0859742  | 0.6872565  | 0.1102184  | 0.08622125 |            |
| 0.05264034   | 0.2186156  | 0.2741076  | 5.2531540  | 0.03187782 | 0.483443   |            |
| 1.0910910    | 0.1765     | 6.3527320  | 0.04503564 | 0.2174275  | 0.3741271  | 0          |
| 0.04340687   | 0.2670463  | 0.8890369  | 0          | 0.1140332  | 0.1890078  | 0.6546545  |
| 0.2222366    | 0.1173790  | 0.1964321  | 1.5310070  | 0.04503564 | 0.1451489  |            |
| 0.8070077    | 0.07435415 | 0.3517069  | 1.6106580  | 0.03200533 | 0.3950191  |            |
| 0.7419546    | 0.09624698 | 0.09296668 | 0.03828389 | 0.2508255  | 0          | 0.3975184  |
| 0.1294714    | 0.06567441 | 0.1236712  | 0          | 0          | 0.06154871 | 0.08393006 |
| 0.01963517   | 0.02646527 | 0.5561438  | 0.1554431  | 0.6110108  | 1.084926   |            |
| 1.7387860    | 0.8304085  | 0.3461541  | 0          | 0.0521826  | 2.7398093  | 4.772141   |
| 0.4396336    | 0.1316236  | 0.4055256  | 0.07656777 | 0.3505346  | 0          | 0.1494025  |
| 0.04271174   | 2.4526090  | 0.1121682  | 0.8491980  | 0.04195455 | 0          | 0.4482074  |
| 0.3176332    | 0.8594684  | 0          | 0.09232306 | 0.04007345 | 0.06534663 | 0.9264701  |
| 0.01366192   | 0.2653353  | 0          | 0.7921585  | 0.07144047 | 5.9796430  | 0.03707181 |
| 0.06667777   | 0.96545    | 0.06558469 | 0.1076412  | 0.04445185 | 0.08378358 | 0          |
| 0.1771513    | 1.1927450  | 0.1901307  | 0.2219168  | 0.2101926  | 0.1032430  | 0.3070874  |
| 1.53217      | 0          | 0          | 0.2649448  | 0.2493922  | 0.1846461  | 0.06031155 |
| 0            | 0.6448835  | 0.8106337  | 0.06202583 | 0.03834504 | 0.5969022  | 0.7014155  |
| 0.3166232    | 1.9004110  | 0.04546212 | 0.4503564  | 0.05971143 | 0.06913594 |            |
| 0.1767165    | 0.8237234  | 0.03540413 | 0.04309515 | 0.3408448  | 0          | 0.4097717  |
| 0            | 0.2564008  | 0.1064479  | 0.6399928  | 0.2044633  | 0.04356442 | 0.06526372 |

|                    |                           |                   |                                   |                            |                   |            |
|--------------------|---------------------------|-------------------|-----------------------------------|----------------------------|-------------------|------------|
| 1.1861620.2637802  | 0.1723806                 | 0                 | 0.5715237                         | 0.2562704                  | 0.2913106         |            |
| 1.2954350          | 0.1578172                 | 0.3072975         | 2.4863950.05601866                | 0.08792673                 |                   |            |
| 0.6869831          | 0.2561402                 | 0.01527458        | 0.1893557                         | 0                          | 0.1629281         | 0          |
| 0.4751027          | 0.1584422                 | 0.1443126         | 0                                 | 1.1150240.08650089         | 0.4696434         |            |
| 0.2623388          | 0.2370375                 | 0.4190945         | 0.06671483                        | 0.1003302                  | 3.140479          |            |
| 0.09092423         | 0.1675672                 | 0                 | 1.1462480.1678042                 | 0.1037637                  | 0                 | 0.1098581  |
| 0                  | 0.1822845                 | 0.2979590.5902622 | 0.2355899                         | 0.2604412                  | 0.3965082         | 0          |
| 0.07379034         | 0.0273083                 | 0.09450392        | 0.08692601                        | 0.3269437                  | 0.8362048         | 0          |
| 0                  | 0.7681279                 | 0.2680513         | 0.1259920.4775746                 | 0.1229173                  | 0.1811622         | 0          |
| 0.2315901          | 0.3878563                 | 0.1040636         | 0.7423917                         | 0.06799999                 | 0.7970077         |            |
| 8.7495210.01110011 | 0.2160090.5698278         | 0                 | 0.1145030                         | 0.3058859                  | 0                 |            |
| 0.08252848         |                           |                   |                                   |                            |                   |            |
| TCGA-DK-A3IK       | 146                       | 1                 | 0.3590239                         | 0.2972389                  | 0.1260034         | 0.5034932  |
| 0.1244125          | 23.275510.04035           | 0.4545424         | 0.3170357                         | 0.1594413                  | 0.1487748         |            |
| 1.0960610.9002855  | 1.3095020.3004107         | 0.1847757         | 0.1644987                         | 0.08148751                 |                   |            |
| 0.6306624          | 0.1656045                 | 0.2851120.2380065 | 3.001841114.05260.1119712         |                            |                   |            |
| 0.09960545         | 0.2132786                 | 0.1663033         | 0                                 | 1.8768510.1151106          | 0.4344563         |            |
| 0.19906            | 1.1782920.4210884         | 0.5432991         | 0.4682572                         | 0.2529245                  | 0.1538803         |            |
| 0.02693088         | 0.09831447                | 0.1080424         | 0.4187874                         | 0                          | 17.836740.6613067 |            |
| 0.2399030.04314129 | 0.6998203                 | 0.5132015         | 5.2744350.3081135                 | 0.7735212                  |                   |            |
| 0.2866762          | 0                         | 1.3749830.1781821 | 0.1228329                         | 7.86909                    | 0                 | 0.07801639 |
| 1.1379330.0746475  | 0.1152863                 | 0.8802705         | 0.6943953                         | 0.2150239                  |                   |            |
| 0.2618614          | 0.0205409                 | 0.1489565         | 0.2147126                         | 0.2797836                  | 1.413654          |            |
| 1.8839610.0437932  | 0.2252119                 | 0.05801277        | 0.6321392                         | 0.1272072                  |                   |            |
| 0.3928816          | 0.6006120.1320840.1673625 | 0.1594413         | 0.5841090.1813077                 | 0                          |                   |            |
| 0.08974016         | 0.5474150.1722635         | 0.06958665        | 0.1746355                         | 0.07242535                 |                   |            |
| 0.08271488         | 0.6503535                 | 0                 | 0.0463911                         | 0.4314478                  | 1.0297320.1714925 |            |
| 0.07129862         | 0.03570098                | 0.4476306         | 4.6044251.8217830.2406220.3033295 |                            |                   |            |
| 1.5472740.2357289  | 1.1990990.1829799         | 0.03407147        | 0.2337715                         | 2.408958                   |                   |            |
| 0.3069617          | 0.6197151                 | 0.02050243        | 0.3120655                         | 1.6354311.0555070.4155266  |                   |            |
| 1.0054560          | 0.1644987                 | 0.2384385         | 1.4789810.09346869                | 0.7382236                  |                   |            |
| 0.1119712          | 0.8147572                 | 0.09775267        | 0.8474218                         | 0.4184871                  | 0.04561791        |            |
| 4.4698020.8076614  | 0.3037785                 | 0.1824717         | 0.3152652                         | 0.3986031                  |                   |            |
| 0.2726975          | 1.6218440.1625985         | 0.05060847        | 0                                 | 0.1059513                  | 1.505683          |            |
| 1.7470690.1321726  | 0.0261921                 | 0.3504423         | 0                                 | 0.6947959                  | 0.08252487        |            |
| 0.3266672          | 0.1223274                 | 0.5882668         | 1.1034510.0636529                 | 0.3672752                  |                   |            |
| 0.7584081.49295    | 0.9849408                 | 0.6500875         | 0.7775781                         | 1.3248880.285963           |                   |            |
| 0.2554183          | 0.04030049                | 0.9762983         | 0                                 | 0.1769025                  | 0.05829765        | 0.02139733 |
| 0.1623063          | 0.3164926                 | 0.2088307         | 0.9103353                         | 0.2802266                  | 0.5595383         |            |
| 1.0431680.3869709  | 1.3445280.2165598         | 0.0589675         | 0.1002898                         | 0.167576                   |                   |            |
| 0.6720931          | 0.2391619                 | 1.1129060.0768122 | 0.4470016                         | 0.4561791                  |                   |            |
| 0.6906638          | 0.1437204                 | 0.06015549        | 0.8294166                         | 0.2253080.1672028          |                   |            |
| 0.4706934          | 0.2469541                 | 0.1175759         | 0                                 | 3.2194810.2167980.09873216 |                   |            |
| 0.2366347          | 0.5438833                 | 0.11836           | 1.7136471.3461020.5513791         | 0.7019831                  |                   |            |

|            |            |            |             |            |           |           |
|------------|------------|------------|-------------|------------|-----------|-----------|
| 0.1369298  | 0.1544431  | 1.3220130  | 0.2799281   | 0.2292838  | 0         | 0.1355427 |
| 0.8364297  | 0.07099041 | 0.07282683 | 0.1127399   | 0.09348643 | 1.299618  |           |
| 0.3397501  | 0.1794803  | 0.07163555 | 0.02969701  | 0.1669372  | 0.1273058 |           |
| 0.2675653  | 0.1494648  | 0.1293106  | 0.008495835 | 0.8802895  | 3.062383  |           |
| 0.02113571 | 0.1533017  | 0          | 0.4951492   | 0.1551565  | 0.3187005 | 0.9370527 |
| 0.3511719  | 0.1203110  | 0.6851609  | 0.1474188   | 0.4034417  | 0.5987566 |           |
| 0.1395676  | 6.4470945  | 6.241260   | 0.2961737   | 0.1108377  | 0.0487313 | 0.5627631 |
| 0.07833779 | 0          | 1.3657840  | 0.06483079  | 0.1613207  |           |           |
