# Supplementary material for: Ferroptosis‐Related Long Noncoding RNAs Have Excellent Predictive Ability for Multiomic Characteristics of Bladder Cancer
Source: Hindawi journal article supplement (doi:10.1155/2022/9316847), 2022-01-01
Supplement: f1 [file 9316847.f1.zip]

ID TCGA-GD-A3OP-11A-11R-A220-07 TCGA-BT-A20Q-11A-11R-A14Y-07 TCGA-GD-A2C5-11A-11R-A180-07 TCGA-BT-A20N-11A-11R-A14Y-07 TCGA-BT-A2LB-11A-11R-A18C-07 TCGA-GC-A3BM-11A-11R-A22U-07 TCGA-CU-A0YR-11A-13R-A10U-07 TCGA-GC-A3WC-11A-11R-A22U-07 TCGA-CU-A0YN-11A-11R-A10U-07 TCGA-BT-A20R-11A-11R-A16R-07 TCGA-BT-A20U-11A-11R-A14Y-07 TCGA-BT-A20W-11A-11R-A14Y-07 TCGA-GD-A3OQ-11A-21R-A220-07 TCGA-K4-A5RI-11A-11R-A28M-07 TCGA-BL-A13J-11A-13R-A10U-07 TCGA-K4-A54R-11A-11R-A26T-07 TCGA-K4-A3WV-11A-21R-A22U-07 TCGA-GC-A6I3-11A-11R-A31N-07 TCGA-BT-A2LA-11A-11R-A18C-07 TCGA-CF-A47X-01A-31R-A23W-07 TCGA-ZF-AA51-01A-21R-A39I-07 TCGA-BL-A0C8-01A-11R-A10U-07 TCGA-BT-A42C-01A-11R-A23N-07 TCGA-G2-A3IB-01A-11R-A20F-07 TCGA-2F-A9KP-01A-11R-A38B-07 TCGA-DK-A3IT-01A-31R-A20F-07 TCGA-FD-A43P-01A-31R-A23W-07 TCGA-DK-A3IV-01A-22R-A21D-07 TCGA-2F-A9KW-01A-11R-A38B-07 TCGA-GU-A762-01A-11R-A33J-07 TCGA-XF-AAME-01A-12R-A42T-07 TCGA-XF-AAN0-01A-11R-A42T-07 TCGA-CF-A47W-01A-11R-A23W-07 TCGA-GC-A3I6-01A-11R-A20F-07 TCGA-FD-A6TA-01A-12R-A33J-07 TCGA-DK-A1A7-01A-11R-A13Y-07 TCGA-FD-A3SR-01A-11R-A22U-07 TCGA-GU-AATP-01A-11R-A39I-07 TCGA-DK-AA6X-01A-12R-A42T-07 TCGA-XF-A9T3-01A-11R-A42T-07 TCGA-PQ-A6FN-01A-11R-A31N-07 TCGA-DK-A3WW-01A-22R-A23N-07 TCGA-XF-AAMY-01A-11R-A42T-07 TCGA-K4-A3WS-01A-11R-A22U-07 TCGA-UY-A9PA-01A-11R-A38B-07 TCGA-G2-AA3F-01A-12R-A42T-07 TCGA-FJ-A871-01A-11R-A352-07 TCGA-ZF-A9RN-01A-11R-A42T-07 TCGA-GC-A3RB-01A-12R-A220-07 TCGA-UY-A9PF-01A-11R-A38B-07 TCGA-YC-A89H-01A-11R-A36F-07 TCGA-XF-AAMQ-01A-11R-A42T-07 TCGA-CF-A1HR-01A-11R-A13Y-07 TCGA-E7-A3X6-01A-12R-A22U-07 TCGA-DK-A6AW-01A-11R-A30C-07 TCGA-GC-A3BM-01A-11R-A22U-07 TCGA-GV-A6ZA-01A-12R-A33J-07 TCGA-G2-A2EJ-01A-11R-A180-07 TCGA-FD-A43N-01A-11R-A23W-07 TCGA-UY-A8OD-01A-11R-A36F-07 TCGA-2F-A9KT-01A-11R-A38B-07 TCGA-BT-A20Q-01A-11R-A14Y-07 TCGA-CU-A0YR-01A-12R-A10U-07 TCGA-SY-A9G5-01A-11R-A38B-07 TCGA-4Z-AA84-01A-11R-A39I-07 TCGA-4Z-AA7Q-01A-11R-A39I-07 TCGA-FD-A5BT-01A-11R-A26T-07 TCGA-CF-A27C-01A-11R-A16R-07 TCGA-E7-A6MF-01A-12R-A32O-07 TCGA-FT-A61P-01A-11R-A30C-07 TCGA-DK-AA77-01A-11R-A39I-07 TCGA-ZF-AA5N-01A-11R-A42T-07 TCGA-DK-AA6U-01A-11R-A39I-07 TCGA-BT-A20O-01A-21R-A14Y-07 TCGA-GD-A3OS-01A-12R-A220-07 TCGA-XF-A9SZ-01A-11R-A39I-07 TCGA-4Z-AA82-01A-11R-A39I-07 TCGA-DK-AA76-01A-11R-A39I-07 TCGA-DK-A3IL-01A-11R-A20F-07 TCGA-E7-A678-01A-11R-A30C-07 TCGA-ZF-A9R1-01A-11R-A39I-07 TCGA-XF-A9SH-01A-11R-A39I-07 TCGA-FD-A5BU-01A-31R-A26T-07 TCGA-C4-A0F7-01A-11R-A084-07 TCGA-C4-A0F0-01A-12R-A10U-07 TCGA-FD-A3N5-01A-11R-A21D-07 TCGA-ZF-AA5H-01A-11R-A39I-07 TCGA-DK-A3WX-01A-22R-A22U-07 TCGA-YF-AA3L-01A-11R-A38B-07 TCGA-BT-A2LA-01A-11R-A18C-07 TCGA-4Z-AA87-01A-11R-A39I-07 TCGA-BT-A2LB-01A-11R-A18C-07 TCGA-XF-A8HB-01A-11R-A36F-07 TCGA-DK-A2I6-01A-12R-A18C-07 TCGA-ZF-AA4X-01A-11R-A38B-07 TCGA-BT-A20P-01A-11R-A14Y-07 TCGA-BT-A20W-01A-21R-A14Y-07 TCGA-FD-A5BX-01A-11R-A26T-07 TCGA-BL-A13J-01A-11R-A10U-07 TCGA-CF-A8HX-01A-11R-A36F-07 TCGA-PQ-A6FI-01A-11R-A31N-07 TCGA-FJ-A3Z7-01A-12R-A23N-07 TCGA-E7-A7PW-01A-11R-A352-07 TCGA-4Z-AA7S-01A-

11R-A39I-07 TCGA-CF-A3MH-01A-11R-A20F-07 TCGA-DK-A6B2-01A-11R-A30C-07  
TCGA-4Z-AA86-01A-11R-A39I-07 TCGA-BL-A0C8-01B-04R-A277-07 TCGA-5N-  
A9KI-01A-31R-A42T-07 TCGA-GU-AATO-01A-11R-A39I-07 TCGA-CF-A9FH-01A-  
11R-A38B-07TCGA-FD-A6TG-01A-11R-A32O-07 TCGA-4Z-AA7O-01A-31R-A39I-07  
TCGA-GV-A3QI-01A-11R-A220-07 TCGA-DK-A6AV-01A-12R-A30C-07 TCGA-DK-  
A1A3-01A-11R-A13Y-07 TCGA-GD-A6C6-01A-21R-A31N-07TCGA-GC-A3RD-01A-  
12R-A22U-07 TCGA-BT-A20R-01A-12R-A16R-07 TCGA-XF-A9T0-01A-11R-A39I-07  
TCGA-YF-AA3M-01A-11R-A42T-07 TCGA-4Z-AA7Y-01A-11R-A39I-07 TCGA-FD-  
A62O-01A-11R-A30C-07 TCGA-BL-A3JM-01A-12R-A21D-07 TCGA-FJ-A3ZF-01A-11R-  
A23N-07TCGA-CU-A0YO-01A-11R-A10U-07TCGA-CF-A5UA-01A-11R-A28M-07TCGA-  
K4-AAQO-01A-11R-A38B-07 TCGA-XF-AAMJ-01A-11R-A42T-07 TCGA-GU-A763-  
01A-11R-A32O-07 TCGA-G2-A2EC-01A-11R-A180-07 TCGA-FD-A3B7-01A-31R-  
A20F-07 TCGA-FD-A5C0-01A-11R-A28M-07 TCGA-FD-A5BS-01A-21R-A26T-07 TCGA-  
CU-A0YN-01A-21R-A10U-07 TCGA-FD-A5BZ-01A-11R-A28M-07 TCGA-UY-A9PE-  
01A-11R-A38B-07 TCGA-GV-A40E-01A-12R-A23N-07 TCGA-BT-A2LD-01A-12R-  
A20F-07 TCGA-UY-A9PD-01A-11R-A38B-07 TCGA-G2-AA3B-01A-11R-A39I-07 TCGA-  
K4-A54R-01A-11R-A26T-07 TCGA-DK-A1AA-01A-11R-A13Y-07 TCGA-CU-A5W6-  
01A-11R-A28M-07 TCGA-DK-AA6R-01A-11R-A42T-07 TCGA-BT-A3PH-01A-11R-  
A220-07 TCGA-BL-A13I-01B-04R-A277-07 TCGA-CF-A3MF-01A-12R-A21D-07 TCGA-  
CF-A47T-01A-11R-A23W-07 TCGA-YC-A8S6-01A-31R-A38B-07 TCGA-DK-A3IS-01A-  
21R-A21D-07 TCGA-XF-A9SJ-01A-11R-A39I-07 TCGA-DK-AA6T-01A-11R-A39I-07  
TCGA-BT-A20N-01A-11R-A14Y-07 TCGA-C4-A0F6-01A-11R-A10U-07 TCGA-CF-  
A7I0-01A-22R-A352-07 TCGA-FD-A3B6-01A-21R-A20F-07 TCGA-GC-A3YS-01A-  
11R-A23N-07 TCGA-XF-A9T2-01A-11R-A42T-07 TCGA-UY-A78O-01A-12R-A33J-07  
TCGA-GC-A3OO-01A-11R-A22U-07 TCGA-E7-A6ME-01A-22R-A32O-07 TCGA-  
XF-AAN5-01A-11R-A42T-07 TCGA-FD-A3SN-01A-12R-A22U-07 TCGA-ZF-A9R2-01A-  
11R-A39I-07 TCGA-ZF-AA4T-01A-11R-A38B-07 TCGA-E7-A4IJ-01A-31R-A26T-07  
TCGA-FD-A6TE-01A-12R-A33J-07 TCGA-H4-A2HO-01A-11R-A180-07 TCGA-FD-  
A6TB-01A-12R-A33J-07 TCGA-XF-AAN3-01A-11R-A42T-07 TCGA-XF-AAMH-01A-  
11R-A42T-07TCGA-FD-A3B8-01A-31R-A20F-07 TCGA-XF-A9SY-01A-21R-A42T-07  
TCGA-CF-A9FF-01A-11R-A38B-07 TCGA-XF-A9ST-01A-11R-A42T-07 TCGA-DK-  
A6B5-01A-11R-A31N-07 TCGA-GC-A3RC-01A-11R-A22U-07 TCGA-GV-A3QK-01B-  
11R-A23N-07 TCGA-GU-A764-01A-11R-A352-07 TCGA-GU-A42R-01A-11R-A23N-  
07 TCGA-DK-A6B6-01A-11R-A30C-07 TCGA-R3-A69X-01A-22R-A30C-07 TCGA-5N-  
A9KM-01A-11R-A42T-07 TCGA-FD-A6TF-01A-52R-A32O-07 TCGA-XF-AAMR-01A-  
31R-A42T-07TCGA-XF-A8HF-01A-11R-A36F-07 TCGA-ZF-AA4U-01A-11R-A38B-07  
TCGA-DK-A3IQ-01A-31R-A32Y-07 TCGA-E7-A4XJ-01A-11R-A26T-07 TCGA-XF-  
A9T6-01A-11R-A42T-07 TCGA-4Z-AA7M-01A-11R-A39I-07 TCGA-ZF-AA56-01A-  
31R-A39I-07 TCGA-XF-A8HH-01A-11R-A38B-07 TCGA-C4-A0EZ-01A-21R-A24X-07  
TCGA-FD-A62P-01A-32R-A30C-07 TCGA-CF-A47V-01A-11R-A23W-07 TCGA-XF-  
A9SI-01A-11R-A39I-07 TCGA-GU-A42Q-01A-11R-A23W-07 TCGA-BT-A42F-01A-  
11R-A23W-07 TCGA-ZF-A9RF-01A-11R-A38B-07 TCGA-KQ-A41N-01A-11R-A33J-  
07 TCGA-GD-A3OQ-01A-32R-A220-07 TCGA-BT-A20U-01A-11R-A14Y-07 TCGA-  
XF-A9SW-01A-11R-A42T-07 TCGA-FD-A3B3-01A-12R-A206-07 TCGA-ZF-A9RC-01A-

11R-A38B-07TCGA-E7-A6MD-01A-41R-A352-07 TCGA-E5-A4TZ-01A-11R-A31N-07  
TCGA-ZF-A9R4-01A-11R-A38B-07 TCGA-GV-A3QH-01A-11R-A220-07TCGA-BT-  
A0YX-01A-11R-A10U-07 TCGA-FT-A3EE-01A-11R-A206-07 TCGA-ZF-A9RL-01A-11R-  
A38B-07 TCGA-ZF-A9R9-01A-11R-A38B-07 TCGA-ZF-A9RE-01A-11R-A38B-07 TCGA-  
DK-A6B1-01A-12R-A30C-07 TCGA-CF-A5U8-01A-11R-A28M-07 TCGA-XF-AAMW-  
01A-11R-A42T-07 TCGA-BT-A3PJ-01A-21R-A220-07 TCGA-ZF-A9R7-01A-11R-  
A38B-07 TCGA-FD-A3SO-01A-11R-A22U-07 TCGA-E7-A97P-01A-11R-A38B-07 TCGA-  
GU-A767-01A-11R-A32O-07 TCGA-4Z-AA81-01A-11R-A39I-07 TCGA-2F-A9KQ-  
01A-11R-A38B-07 TCGA-SY-A9G0-01A-12R-A38B-07 TCGA-GV-A40G-01A-11R-  
A23N-07TCGA-FD-A43Y-01A-21R-A26T-07 TCGA-S5-AA26-01A-11R-A38B-07 TCGA-  
BT-A42E-01A-11R-A23W-07 TCGA-FD-A43X-01A-11R-A23W-07 TCGA-ZF-AA4R-  
01A-11R-A38B-07 TCGA-BT-A20T-01A-11R-A14Y-07 TCGA-E7-A7DU-01A-11R-  
A32O-07 TCGA-DK-A3WY-01A-11R-A22U-07 TCGA-G2-A2EF-01A-12R-A18C-07  
TCGA-BT-A20V-01A-11R-A14Y-07 TCGA-K4-A3WV-01A-11R-A22U-07TCGA-GU-  
AATQ-01A-11R-A39I-07 TCGA-G2-A3VY-01A-11R-A22U-07 TCGA-XF-AAN8-01A-  
11R-A42T-07TCGA-CU-A3QU-01A-11R-A22U-07 TCGA-GD-A3OP-01A-21R-A220-  
07 TCGA-KQ-A41P-01A-12R-A33J-07 TCGA-UY-A9PH-01A-11R-A38B-07 TCGA-FD-  
A5BY-01A-31R-A28M-07 TCGA-K4-A3WU-01B-11R-A23N-07TCGA-FD-A3SJ-01A-12R-  
A22U-07TCGA-FD-A3B5-01A-11R-A20F-07 TCGA-GC-A6I3-01A-11R-A31N-07 TCGA-  
4Z-AA80-01A-11R-A39I-07 TCGA-G2-A3IE-01A-11R-A20F-07 TCGA-ZF-A9R0-01A-  
11R-A38B-07TCGA-FD-A43S-01A-21R-A23W-07 TCGA-XF-A8HG-01A-11R-A36F-07  
TCGA-K4-A83P-01A-11R-A352-07 TCGA-GD-A2C5-01A-12R-A180-07 TCGA-XF-  
AAMX-01A-11R-A42T-07 TCGA-DK-A1AE-01A-11R-A13Y-07 TCGA-FJ-A3ZE-01A-11R-  
A23N-07TCGA-DK-A2I1-01A-11R-A180-07 TCGA-DK-A6B0-01A-11R-A31N-07 TCGA-  
FD-A5BR-01A-11R-A26T-07 TCGA-KQ-A41Q-01A-11R-A33J-07 TCGA-DK-A1AF-  
01A-11R-A13Y-07 TCGA-LT-A5Z6-01A-11R-A28M-07 TCGA-GC-A4ZW-01A-11R-  
A26T-07 TCGA-K4-A4AB-01B-12R-A28M-07 TCGA-DK-AA74-01A-11R-A39I-07 TCGA-  
G2-A2EO-01A-11R-A180-07 TCGA-DK-A1AG-01A-11R-A13Y-07 TCGA-GV-A3JZ-01A-  
11R-A21D-07 TCGA-XF-A9SV-01A-21R-A42T-07 TCGA-UY-A78K-01A-11R-A33J-07  
TCGA-FD-A6TH-01A-11R-A32O-07 TCGA-DK-AA6W-01A-12R-A39I-07 TCGA-CF-  
A3MG-01A-11R-A20F-07 TCGA-DK-A3X1-01A-12R-A22U-07 TCGA-DK-A1A6-01A-  
11R-A13Y-07TCGA-XF-AAMG-01A-11R-A42T-07TCGA-E7-A541-01A-11R-A26T-07  
TCGA-XF-A8HE-01A-11R-A36F-07 TCGA-DK-AA6Q-01A-11R-A39I-07 TCGA-UY-  
A78N-01A-12R-A33J-07 TCGA-DK-AA75-01A-11R-A39I-07 TCGA-ZF-AA5P-01A-  
11R-A39I-07 TCGA-GC-A3WC-01A-31R-A22U-07 TCGA-K4-A4AC-01A-21R-A26T-07  
TCGA-FD-A3SL-01A-21R-A22U-07 TCGA-K4-A5RH-01A-11R-A30C-07 TCGA-FD-  
A5C1-01A-11R-A28M-07 TCGA-BL-A13J-01A-11R-A277-07 TCGA-XF-AAN7-01A-  
11R-A42T-07TCGA-2F-A9KO-01A-11R-A38B-07 TCGA-DK-A3IM-01A-11R-A20F-07  
TCGA-FD-A3SS-01A-12R-A22U-07 TCGA-4Z-AA7N-01A-11R-A39I-07 TCGA-HQ-  
A2OE-01A-11R-A206-07 TCGA-UY-A8OC-01A-11R-A36F-07 TCGA-GV-A3JV-01A-  
11R-A220-07TCGA-XF-A9T8-01A-11R-A39I-07 TCGA-KQ-A41S-01A-12R-A33J-07  
TCGA-CU-A3YL-01A-11R-A22U-07 TCGA-E7-A7XN-01A-11R-A352-07 TCGA-DK-  
A2HX-01A-12R-A18C-07 TCGA-CF-A8HY-01A-11R-A36F-07 TCGA-4Z-AA7W-01A-  
11R-A39I-07 TCGA-FD-A43U-01A-11R-A23W-07TCGA-BL-A0C8-01A-11R-A277-07

TCGA-BT-A0S7-01A-11R-A10U-07 TCGA-ZF-A9R3-01A-11R-A38B-07 TCGA-4Z-AA89-01A-11R-A39I-07 TCGA-GU-A42P-01A-11R-A23W-07 TCGA-FD-A3NA-01A-11R-A21D-07 TCGA-XF-A9SL-01A-11R-A39I-07 TCGA-XF-AAN2-01A-11R-A42T-07 TCGA-ZF-AA54-01A-11R-A39I-07 TCGA-GU-A766-01A-11R-A32O-07 TCGA-FD-A6TD-01A-51R-A33J-07 TCGA-FD-A3B4-01A-12R-A206-07 TCGA-DK-A1AB-01A-11R-A13Y-07 TCGA-BT-A20X-01A-11R-A16R-07 TCGA-GV-A3JW-01A-11R-A20F-07 TCGA-UY-A9PB-01A-11R-A38B-07 TCGA-FD-A6TI-01A-11R-A32O-07 TCGA-XF-AAML-01A-11R-A42T-07 TCGA-ZF-AA58-01A-12R-A42T-07 TCGA-FD-A3SP-01A-31R-A22U-07 TCGA-E7-A97Q-01A-11R-A38B-07 TCGA-YC-A9TC-01A-22R-A39I-07 TCGA-GV-A3QG-01A-11R-A220-07 TCGA-K4-A6FZ-01A-11R-A31N-07 TCGA-KQ-A41R-01A-21R-A352-07 TCGA-DK-AA6M-01A-11R-A39I-07 TCGA-ZF-AA52-01A-12R-A39I-07 TCGA-K4-A5RJ-01A-11R-A28M-07 TCGA-HQ-A5ND-01A-11R-A26T-07 TCGA-BT-A3PK-01A-21R-A220-07 TCGA-FD-A3N6-01A-11R-A21D-07 TCGA-UY-A78P-01A-12R-A36F-07 TCGA-CF-A9FL-01A-11R-A38B-07 TCGA-CF-A9FM-01A-11R-A38B-07 TCGA-ZF-A9RD-01A-11R-A42T-07 TCGA-G2-AA3D-01A-11R-A39I-07 TCGA-DK-A2I2-01A-11R-A180-07 TCGA-FD-A62S-01A-11R-A30C-07 TCGA-MV-A51V-01A-11R-A26T-07 TCGA-E5-A2PC-01A-11R-A206-07 TCGA-DK-A3X2-01A-11R-A22U-07 TCGA-GD-A76B-01A-11R-A32O-07 TCGA-GC-A6I1-01A-12R-A31N-07 TCGA-BL-A13J-01B-04R-A277-07 TCGA-XF-A9SK-01A-11R-A42T-07 TCGA-DK-A1AD-01A-11R-A13Y-07 TCGA-K4-A5RI-01A-11R-A28M-07 TCGA-FD-A3SQ-01A-21R-A22U-07 TCGA-GV-A3QF-01A-31R-A22U-07 TCGA-E7-A7DV-01A-11R-A33J-07 TCGA-XF-AAN1-01A-31R-A42T-07 TCGA-DK-AA6P-01A-11R-A39I-07 TCGA-CF-A47Y-01A-11R-A23W-07 TCGA-CF-A3MI-01A-11R-A20F-07 TCGA-G2-A2EL-01A-12R-A18C-07 TCGA-XF-AAMZ-01A-11R-A42T-07 TCGA-DK-AA6L-01A-11R-A39I-07 TCGA-XF-A9T4-01A-11R-A39I-07 TCGA-K4-A6MB-01A-11R-A31N-07 TCGA-UY-A8OB-01A-12R-A42T-07 TCGA-ZF-A9R5-01A-12R-A42T-07 TCGA-CU-A3KJ-01A-11R-A21D-07 TCGA-DK-AA6S-01A-21R-A39I-07 TCGA-E7-A85H-01A-11R-A352-07 TCGA-G2-AA3C-01A-21R-A39I-07 TCGA-E7-A8O8-01A-11R-A36F-07 TCGA-XF-A9SM-01A-11R-A42T-07 TCGA-DK-A3IN-01A-11R-A20F-07 TCGA-XF-A8HC-01A-11R-A36F-07 TCGA-ZF-AA4W-01A-12R-A38B-07 TCGA-LC-A66R-01A-41R-A30C-07 TCGA-E7-A8O7-01A-11R-A36F-07 TCGA-LT-A8JT-01A-11R-A36F-07 TCGA-FJ-A3Z9-01A-11R-A26T-07 TCGA-DK-A1AC-01A-11R-A13Y-07 TCGA-C4-A0F1-01A-11R-A034-07 TCGA-G2-A2ES-01A-11R-A180-07 TCGA-XF-AAN4-01A-11R-A42T-07 TCGA-4Z-AA83-01A-11R-A39I-07 TCGA-E7-A5KE-01A-11R-A28M-07 TCGA-ZF-AA4V-01A-11R-A38B-07 TCGA-ZF-AA53-01A-11R-A39I-07 TCGA-ZF-A9RM-01A-11R-A38B-07 TCGA-BL-A13I-01A-11R-A13Y-07 TCGA-CU-A72E-01A-12R-A33J-07 TCGA-2F-A9KR-01A-11R-A38B-07 TCGA-E5-A4U1-01A-11R-A31N-07 TCGA-E7-A3Y1-01A-11R-A22U-07 TCGA-FD-A6TC-01A-21R-A33J-07 TCGA-FD-A5BV-01A-11R-A26T-07 TCGA-DK-A2I4-01A-11R-A21D-07 TCGA-UY-A78M-01A-21R-A352-07 TCGA-4Z-AA7R-01A-11R-A39I-07 TCGA-E7-A519-01A-11R-A26T-07 TCGA-DK-A3IU-01A-11R-A20F-07 TCGA-FD-A3SM-01A-11R-A22U-07 TCGA-BL-A5ZZ-01A-31R-A30C-07 TCGA-FD-A62N-01A-11R-A30C-07 TCGA-BT-A20J-01A-11R-A14Y-07 TCGA-DK-AA71-01A-31R-A39I-07 TCGA-KQ-A41O-01A-12R-A352-07 TCGA-BL-A13I-01A-11R-A277-07 TCGA-E7-A677-01A-11R-A30C-07 TCGA-DK-A1A5-01A-



11R-A13Y-07TCGA-HQ-A5NE-01A-12R-A28M-07 TCGA-XF-AAMT-01A-11R-A42T-07 TCGA-XF-A9SU-01A-31R-A39I-07 TCGA-CF-A47S-01A-11R-A23W-07 TCGA-FD-A6TK-01A-42R-A33J-07 TCGA-E7-A5KF-01A-11R-A28M-07 TCGA-UY-A78L-01A-12R-A33J-07 TCGA-S5-A6DX-01A-11R-A31N-07 TCGA-XF-A8HI-01A-11R-A38B-07 TCGA-XF-A9T5-01A-11R-A42T-07 TCGA-XF-A9SX-01A-21R-A39I-07 TCGA-G2-A2EK-01A-22R-A18C-07 TCGA-XF-A8HD-01A-11R-A36F-07 TCGA-GV-A3JX-01A-11R-A20F-07 TCGA-H4-A2HQ-01A-11R-A180-07 TCGA-XF-A9SP-01A-11R-A39I-07 TCGA-DK-A3IK-01A-32R-A21D-07

|             |             |             |             |             |             |                      |
|-------------|-------------|-------------|-------------|-------------|-------------|----------------------|
| AC092802.3  | 0.0939763   | 0.06439407  | 0.04831901  | 0.022318166 | 0.011026865 |                      |
| 0.06481334  | 0.05121622  | 0.04914837  | 0.1845426   | 0.02721552  | 0.03969581  |                      |
| 0.088951768 | 0.2757515   | 0.074845722 | 0.134158017 | 0.03370327  | 0.1805234   |                      |
| 0.02006826  | 0.02318985  | 0.3238117   | 0.155167763 | 0.3077708   | 0.1643177   |                      |
| 0.1591313   | 0.1559606   | 0.1621569   | 0.04424554  | 0.3147748   | 0.07013194  | 0                    |
| 0.09226692  | 0.110028138 | 0.02450519  | 0.04124147  | 0.1408469   | 0.113651088 |                      |
| 0.3268885   | 0.06275813  | 0.4040916   | 0.1080562   | 0.01729199  | 0.06856047  |                      |
| 0.3737915   | 0.18033     | 0.02032462  | 0.1125736   | 0.09175805  | 0.04972805  |                      |
| 0.1175163   | 0.1278257   | 0.08766594  | 0.1946938   | 0.05590706  | 0.166278174 |                      |
| 0.1482693   | 0.2628799   | 0.2652681   | 0.1076862   | 0.1569734   | 0.1016047   |                      |
| 0.1007134   | 0.03050143  | 0.01702611  | 0.05419774  | 0.0497527   | 0.17163798  | 0                    |
| 0.4839541   | 0.6892637   | 0.12555983  | 0.08026753  | 0           | 0.08983289  | 0.105206328          |
| 0.4165164   | 0.01797735  | 0.04771186  | 1.0361150   | 0.2497640   | 0.07956366  | 0.04784047           |
| 0.1292512   | 0.03319043  | 0.04433833  | 0           | 0.04954273  | 0.05103511  | 0.2229678            |
| 0.3063202   | 0.07963676  | 0.02597753  | 0.045420608 | 0.08298539  | 0.02816472  |                      |
| 0.3711898   | 0.178584076 | 0.1659287   | 0.05250827  | 0.1089156   | 0.1546617   |                      |
| 0.05367802  | 0.1430958   | 0.1904157   | 0.3039607   | 0.1425845   | 0.06830974  |                      |
| 0.06899208  | 5.2756240   | 0.042059578 | 0           | 0.3374140   | 0.02474426  | 0.1072008            |
| 0.6481213   | 0.1618602   | 0.04927087  | 0.1191905   | 0.05798076  | 0.1447873   |                      |
| 0.1249074   | 0.02455513  | 0.3173731   | 0.2584182   | 0.1886821   | 0.2837494   |                      |
| 0.08019924  | 0.08795273  | 0.06823156  | 0.130343142 | 0.1127758   | 0.2675659   |                      |
| 0.1171045   | 0.07196604  | 0.134484275 | 0.1377520   | 0.09099128  | 0           | 0.07899852           |
| 0.04712419  | 0.04746552  | 0.2623920   | 0.01898512  | 0.1600942   | 0.07549096  |                      |
| 0.03153198  | 0.01052781  | 1.6235430   | 0.0466363   | 0.04396544  | 0.1178927   |                      |
| 0.0630754   | 0.06787535  | 0.093216835 | 0.09478065  | 0.2958778   | 0.026506089 |                      |
| 0.05953543  | 0.1505352   | 0.09546636  | 0.1500692   | 0.1068935   | 0.09556754  |                      |
| 0.07143067  | 0.1439923   | 0.07066721  | 0.3659271   | 0.1283152   | 0.06179863  |                      |
| 0.1561705   | 0.1393271   | 0.01466359  | 0.1067250   | 0.096205284 | 0.3133781   | 0                    |
| 0.39414     | 0.1132618   | 0.1142686   | 0.02675025  | 0.2212425   | 0.2849665   |                      |
| 0.03984392  | 0.1254225   | 0.1214628   | 0.1009660   | 0.01524397  | 0.2503781   |                      |
| 0.1126734   | 0           | 0           | 0.1451080   | 0.05067948  | 0.1466790   | 0.01782301 0.1985523 |
| 0.1291799   | 0.09748069  | 0.052645513 | 0.3158001   | 0.2767768   | 0.1253451   |                      |
| 0.06712817  | 0.121736655 | 0.1174680   | 0.1177988   | 0.2954153   | 0.0655407   |                      |
| 0.2901179   | 0.2199845   | 0.0298943   | 0.03193471  | 0.2156781   | 0.1119005   |                      |
| 0.1225168   | 0.1013392   | 0.1113511   | 0.295242581 | 0.064966298 | 0.1376743   |                      |
| 0.159523211 | 0.093443856 | 0.01484273  | 0.16142679  | 0.1759161   | 0.1854217   |                      |

|             |             |             |             |             |             |
|-------------|-------------|-------------|-------------|-------------|-------------|
| 0.08983605  | 0.018286831 | 0.3806125   | 0.01181285  | 0.2531786   | 0.118628454 |
| 0.0746363   | 0.1289210   | 0.1272691   | 0.3779301   | 0.16976     | 0.1223666   |
| 0.1181505   | 0.2701449   | 0           | 0.1259428   | 0.2783975   | 0.137130477 |
| 0.07637652  | 0.102172863 | 0.1251878   | 0.1877991   | 0.1381192   | 0.07621279  |
| 0.2552458   | 0.5157579   | 0.01905482  | 0.02961309  | 0.1155498   | 0.053678197 |
| 0.08825991  | 0.2023658   | 0.1358974   | 0.1999295   | 0           | 0           |
| 0.08475262  | 0.1767637   | 0.05071222  | 0.7761814   | 0.06725237  | 0.2308706   |
| 0.02600026  | 0.01499186  | 0.215074862 | 0.08116516  | 0.08936564  | 0.05365435  |
| 0.1075861   | 0.49636     | 0.01662761  | 0.1185296   | 0.1024      | 0.1175205   |
| 0.1692976   | 0.132874218 | 0.055112009 | 0.09782246  | 0.08122744  | 0.1476240   |
| 0.2709727   | 0.01673117  | 0.1293376   | 0.1095158   | 0           | 0.2855968   |
| 0.2405973   | 0.2222748   | 0.08428698  | 0.1512934   | 0.2617005   | 0.1592084   |
| 0.01630993  | 0.4604933   | 0.05574553  | 0.136303805 | 0.3469116   | 0.06145375  |
| 0.1326788   | 0.1023942   | 0           | 0.03026713  | 0.7207661   | 0           |
| 0.2462455   | 0.09301956  | 0.1461273   | 0.033873731 | 0.1115358   | 0.170166    |
| 0.0513943   | 0.05369353  | 0           | 0.109954974 | 0.1410504   | 0.05394532  |
| 0.3950106   | 0.07519834  | 0.01089594  | 0.1314304   | 0.096449022 | 0.1818140   |
| 0.6677708   | 0.1249524   | 0.1138081   | 0.068018289 | 0.1142474   | 0.04393104  |
| 0.0569524   | 0.173276234 | 0.045626628 | 0.06134823  | 0.02016058  | 0.04583767  |
| 0.2548853   | 0.1145370   | 0.05604295  | 0.1154153   | 0.05527253  | 0           |
| 0.1226844   | 0.02897266  | 0.1314772   | 0.137981824 | 0.01598289  | 1.9479420   |
| 0.1097458   | 0.1891068   | 0.08468126  | 0.1117769   | 0.3226012   | 0.01147557  |
| 0.2047086   | 0.4546871   | 0.2044080   | 0.01361513  | 0.2407329   | 0.1120485   |
| 0.05643116  | 0.08073654  | 0.02363523  | 0.01965146  | 0.9688755   | 0.1445304   |
| 0.2568286   | 0.2169491   | 0           | 0.2152335   | 0.01661198  | 0.1263864   |
| 0.1338044   | 0           | 0.1017773   | 0.4254793   | 0.2997982   | 0.2018786   |
| 0.2027029   | 0.1435333   | 0           | 0.1065550   | 0.5124965   | 0.5135532   |
| 0.01288773  | 0           | 0.1306015   | 0.06933697  | 0.04549066  | 0.2371776   |
| 0.2455104   | 0.3195541   | 0.09550303  | 0.178511644 | 0.09221628  | 0.07234781  |
| 0.1520827   | 0           | 0.04429458  | 0.065124497 | 0.055003323 | 0.03180663  |
| 0.145725242 | 0.07673728  | 0.2685671   | 0.5189718   | 0.3365528   | 0.1232082   |
| 0.04591008  | 0.1544370   | 0.2338001   | 0.03839017  | 0.4463328   | 0.037275353 |
| 0.05792656  | 0.5955177   | 0.05106004  | 0.04559388  | 0.3433053   | 0.05857076  |
| 0.1179773   | 0.5077722   | 0.0507842   | 0.3590239   |             |             |
| AC009095.1  | 0.1786605   | 0.02295394  | 0.1033429   | 0.023866636 | 0.106127335 |
| 0.2079306   | 0.05476968  | 0.1751945   | 0.03946929  | 0.009701258 | 0.06367495  |
| 0.209271444 | 0.3402502   | 0.016007727 | 0.040990319 | 0.3784374   | 0.08774926  |
| 0.04292125  | 0.0123994   | 0.2597087   | 0.047409586 | 0.3097641   | 0.3631512   |
| 0.2917236   | 0.4093724   | 0.2023088   | 0.1182884   | 0.3946513   | 0.2624923   |
| 0.046474066 | 0.08457304  | 0.188259306 | 0.03930809  | 0.2058134   | 0.1694465   |
| 0.157997297 | 0.1823836   | 0.2237079   | 0.3745111   | 0.1925888   | 0.03698347  |
| 0.1026442   | 0.5329677   | 0.3856832   | 0.3042868   | 0.2708643   | 0.07008883  |
| 0.05317826  | 0.2513396   | 0.08201669  | 0.03124945  | 0.09463724  | 0.2192153   |
| 0.08890741  | 0.1233217   | 0.3255061   | 0.2502995   | 0.1612207   | 0.2637871   |
| 0.0724361   | 0.2154021   | 0.09785302  | 0.3641481   | 0.1159161   | 0.05320462  |
| 0.163152442 | 0           | 0.6437588   | 0.2456953   | 0.033567843 | 0.2918445   |
|             |             |             |             |             | 0           |

|             |             |             |             |             |             |             |
|-------------|-------------|-------------|-------------|-------------|-------------|-------------|
| 0.2470259   | 0.150007615 | 0.1346603   | 0.05767396  | 0.1530665   | 0.1146209   |             |
| 0.2199589   | 0.02127098  | 0.3410648   | 0.08293133  | 0.05323986  | 0.09482919  | 0           |
| 0.09536415  | 0.1091520   | 0.3506436   | 0.03448139  | 0.09580735  | 0.1250095   |             |
| 0.255002802 | 0.1267758   | 0.06023767  | 0.1428997   | 0.136410375 | 0.2883417   |             |
| 0.1123028   | 0.3261225   | 0.1819316   | 0.05740229  | 0.1391127   | 0.1425389   |             |
| 0.2762925   | 0.2922481   | 0.1899279   | 0.07377886  | 3.9085980   | 0.044977738 |             |
| 0.07362061  | 0.4009159   | 0.1323053   | 0.3668433   | 0.08943083  | 0.04327257  |             |
| 0.0878156   | 0.09104294  | 0.1705098   | 0.1407572   | 0.0954098   | 0.02625881  |             |
| 0.1357572   | 0.1554456   | 0.1592946   | 0.3742382   | 0.1543745   | 0           | 0.1641725   |
| 0.116155465 | 0.02192734  | 0.2341064   | 0.03756882  | 0.2462693   | 0           | 0.1031166   |
| 0.1362262   | 0.1710961   | 0.05631971  | 0.1847771   | 0.05075875  | 0.07014929  |             |
| 0.06090701  | 0.1391015   | 0.03229146  | 0.1011592   | 0.1013242   | 3.06386     |             |
| 0.2445137   | 0.0166240   | 0.1175396   | 0.10315     | 0.01686292  | 0.1088770   | 0.119621242 |
| 0.07601751  | 0.1054687   | 0.056690248 | 0.04774957  | 0.09658775  | 0.08507497  |             |
| 0.1283850   | 0.1524132   | 0.06813212  | 0.168050617 | 0.1539827   | 0.2456032   |             |
| 0.2152237   | 0.1943920   | 0.1652158   | 0.3188294   | 0.09932924  | 0.01568097  |             |
| 0.08876759  | 0.144032225 | 0.2680966   | 0.1348682   | 0.2479330   | 0.03028002  |             |
| 0.3221549   | 0.01430311  | 0.5027593   | 0.2437903   | 0.1988390   | 0.08382781  |             |
| 0.04329669  | 0.1511596   | 0.04890486  | 0.1427999   | 0.0535515   | 0.2369277   |             |
| 0.0180413   | 0.4073364   | 0.046544244 | 0.3613047   | 0.1568558   | 0.05717879  |             |
| 0.2547938   | 0.05180348  | 0.1303051   | 0.042223607 | 0.06432588  | 0.05223177  |             |
| 0.0781910   | 0.06509147  | 0.1449439   | 0.1049765   | 0.1579558   | 0.3270774   |             |
| 0.05909462  | 0.5153038   | 0.03196841  | 0.06830077  | 0.5958256   | 0.1675301   |             |
| 0.2246009   | 0.1685759   | 0.2381537   | 0.052621164 | 0.046315842 | 0.3926036   |             |
| 0.077541449 | 0.09992714  | 0.01587254  | 0.05754228  | 0.2037982   | 0.132191    |             |
| 0.1801294   | 0.078222404 | 0.5426933   | 0.1263245   | 0.1547112   | 0.190288629 |             |
| 0.1064196   | 0.08271942  | 0.1663435   | 0.2213210   | 0.1815383   | 0.3107843   |             |
| 0.06317397  | 0.5898129   | 0           | 0.03673114  | 0.1653962   | 0.081469338 | 0.1633513   |
| 0.046826477 | 0.1784980   | 0.1479792   | 0.05680851  | 0.04075028  | 0.1364776   |             |
| 0.3171367   | 0.1426381   | 0.01583385  | 0.2824385   | 0.071753095 | 0.3910174   |             |
| 0.4918325   | 0.2634037   | 0.3207014   | 0.1064515   | 0.05627703  | 0.1268861   |             |
| 0.4983463   | 0.1518460   | 0.2075085   | 0.08989806  | 0.08229626  | 0           | 0.04809607  |
| 0.257055582 | 0.1410444   | 0.09556597  | 0.1004097   | 0.1882647   | 0.246442    |             |
| 0.03556253  | 0.1109092   | 0.1095047   | 0.2154417   | 0.1991481   | 0.157881382 |             |
| 0.137516794 | 0.07845716  | 0.1158175   | 0.08770355  | 0.3380687   | 0.03578401  | 0           |
| 0.1003836   | 0.09749228  | 0.1928918   | 0.0321613   | 0.6338577   | 0.05633434  |             |
| 0.1040081   | 0.2176671   | 0.4086108   | 0.01744153  | 0.1561405   | 0.1043232   |             |
| 0.131184703 | 0.3400658   | 0.2135819   | 0.1091418   | 0           | 0.01968416  | 0.04855067  |
| 0.6347551   | 0.04856665  | 0.2633304   | 0.3183149   | 0.4464739   | 0.024149296 |             |
| 0.05111757  | 0.2079685   | 0.03664008  | 0.1148377   | 0.08072959  | 0.192409897 |             |
| 0.1206694   | 0.04615051  | 0.5218093   | 0           | 0.1398231   | 0.04684976  | 0.132609612 |
| 0.1111020   | 0.7639229   | 0.1336218   | 0.1770244   | 0.084860424 | 0.0244348   |             |
| 0.04697905  | 0.1015064   | 0.102943564 | 0.146376828 | 0.0492035   | 0.1832545   |             |
| 0.01633932  | 0.0170356   | 0.06999071  | 0           | 0.2821096   | 0.1477686   | 0.1231889   |

|             |             |             |             |             |            |             |
|-------------|-------------|-------------|-------------|-------------|------------|-------------|
| 0.1874234   | 0.08262089  | 0.1687191   | 0.067070556 | 0.01709181  | 4.92093    |             |
| 0.1369201   | 0.1427487   | 0.1207421   | 0.1344737   | 0.2979406   | 0          | 0.4378232   |
| 0.2633768   | 0.1502807   | 0.1747172   | 0.3805566   | 0.1198226   | 0.4023097  |             |
| 0.04796565  | 0.2148382   | 0.02101491  | 0.3676476   | 0.2181998   | 0.1569416  |             |
| 0.1637656   | 0.01967913  | 0.09864291  | 0.05329364  | 0.1081242   | 0.143088   |             |
| 0.01924988  | 0.1360484   | 0.1516666   | 0.3624159   | 0.3728927   | 0.1083834  |             |
| 0.09767662  | 0.1195131   | 0.09115833  | 0.1534552   | 0.5814893   | 0.08269142 |             |
| 0.04238746  | 0.2793257   | 0.1038068   | 0.1216172   | 0.2874512   | 0.2250379  |             |
| 0.6346327   | 0.2772078   | 0.119310667 | 0.06574293  | 0.0928409   | 0.3090055  | 0           |
| 0.1302615   | 0.097500114 | 0.088229313 | 0           | 0.077917946 | 0.08206143 | 0.2513006   |
| 0.8324684   | 0.4766288   | 0.0768580   | 0.08182566  | 0.1101014   | 0.02173601 |             |
| 0.03788205  | 0.1094766   | 0.4483728   | 0.079723153 | 0.1445397   | 0.3442355  |             |
| 0.2002098   | 0.02437863  | 0.2723826   | 0.1127421   | 0.1835095   | 0.8720946  |             |
| 0.07241025  | 0.2972389   |             |             |             |            |             |
| TXNDC12-AS1 | 0           | 0           | 0           | 0           | 0          | 0           |
| 0.07692614  | 0           | 0           | 0           | 0.05951689  | 0          | 0.04205014  |
| 0.06565653  | 0.07945525  | 0.04122181  | 0.1028375   | 0.09801298  | 0.0401152  |             |
| 0.0393642   | 0.0635851   | 0           | 0           | 0.039902788 | 0.04443524 | 0.09971082  |
| 0.1276988   | 0.041216686 | 0.05154319  | 0.2275985   | 0.2930956   | 0          | 0           |
| 0.1807456   | 0.05449872  | 0.07370924  | 0.0510324   | 0           | 0          | 0.03874405  |
| 0.1059764   | 0.0962831   | 0.1351683   | 0           | 0           | 0.1003537  | 0.05658946  |
| 0.1562138   | 0.1626513   | 0.1228264   | 0.2191482   | 0.1106165   | 0.06174686 |             |
| 0.1965534   | 0.1804331   | 0.138324897 | 0           | 0.04280749  | 0.05554851 | 0.113838771 |
| 0.05821962  | 0.1338253   | 0.1396234   | 0.190770553 | 0           | 0.1955899  | 0.1153545   |
| 0.3887144   | 0.2131279   | 0           | 0.2313309   | 0.09374847  | 0.1203684  | 0.09647839  |
| 0           | 0.07186863  | 0.07403354  | 0.09513114  | 0           | 0.1805066  | 0.3768403   |
| 0.041180577 | 0           | 0           | 0.05384625  | 0.092521819 | 0.6769762  | 0           |
| 0.03893373  | 0.1887094   | 0.1381123   | 0           | 0           | 0          | 0.125103285 |
| 0.3050664   | 0.2496699   | 0.1359628   | 0.04486874  | 0           | 0          | 0           |
| 0.2102729   | 0.1432051   | 0.2588509   | 0           | 0           | 0.0585737  | 0.1440577   |
| 0.3087136   | 0           | 0           | 0.078783707 | 0           | 0.0882140  | 0           |
| 0.06599777  | 0           | 0           | 0.2848342   | 0.1721384   | 0.0396496  | 0           |
| 0           | 0.03818013  | 4.5025420   | 0.2818852   | 0.0797225   | 0.07773626 | 0           |
| 0.1230783   | 0           | 0           | 0           | 0.1619333   | 0.2183723  | 0.1154060   |
| 0.1938299   | 0           | 0           | 0.06527529  | 0.1922112   | 0          | 0.07755792  |
| 0.06316044  | 0.1063579   | 0           | 0           | 0.07576642  | 0          | 0.04204081  |
| 0.2910372   | 0.2005894   | 0.06889727  | 0           | 0.1705714   | 0          | 0.1220544   |
| 0.05528375  | 0           | 0.04540236  | 0           | 0.1223671   | 0.2631242  | 0.052615233 |
| 0.06126471  | 0           | 0.06463689  | 0.04800464  | 0           | 0.2209521  | 0.095462069 |
| 0.05453716  | 0.1771338   | 0.03788135  | 0.2434469   | 0           | 0.03276994 | 0.1424030   |
| 0.1584599   | 0.1002039   | 0.1139708   | 0.0542073   | 0           | 0.1303630  | 0.1269483   |
| 0.08167033  | 0           | 0.089227191 | 0.039267779 | 0.1664298   | 0          | 0           |
| 0.1063295   | 0.1494333   | 0.04072491  | 0.198956985 | 0.2300548   | 0.08568096 |             |
| 0.08744544  | 0.071702962 | 0.09022529  | 0           | 0           | 0          | 0.07695644  |
|             |             |             |             |             |            | 0.2773590   |

|                    |                   |                   |                   |                     |             |                   |
|--------------------|-------------------|-------------------|-------------------|---------------------|-------------|-------------------|
| 0.08164225         | 0.08555764        | 0.04152216        | 0                 | 0.110514928         | 0.09232899  | 0                 |
| 0.03783381         | 0.0716918         | 0.2697169         | 0.1381966         | 0.1322391           | 0.09352234  | 0                 |
| 0                  | 0.1795941         | 0.048667316       | 0.09145236        | 0.06671814          | 0.0924085   | 0.0453165         |
| 0                  | 0                 | 0.06147275        | 0.2331095         | 0                   | 0.1919249   | 0                 |
| 0.2174779          | 0.045881774       | 0.07358837        | 0                 | 0.04864569          | 0           | 0.06428923        |
| 0.05373243         | 0.1237879         | 0.06088568        | 0                 | 0.107084763         | 0           | 0.1330360.0981931 |
| 0.05948588         | 0.1637849         | 0                 | 0.05211727        | 0.05673856          | 0           | 0.3270773         |
| 0.2015254          | 0.03820938        | 0.1567659         | 0                 | 0.3175617           | 0           | 0.0814646         |
| 0.247159585        | 0.05242122        | 0.1671511         | 0.03701329        | 0                   | 0           | 0.05488337        |
| 0.2306408          | 0                 | 0.1880071         | 0.06746892        | 0.1135597           | 0           | 0                 |
| 0.06212884         | 0.04868121        | 0.1095114         | 0.03625114        | 0.1364089           | 0.0391276   |                   |
| 0.1685347          | 0                 | 0                 | 0.07944089        | 0.149906518         | 0.1412928   | 0.3942362         |
| 0.05035023         | 0.03752148        | 0                 | 0.08286585        | 0.07966012          | 0           | 0.069822591       |
| 0.08343202         | 0.1462287         | 0.05541161        | 0.05777291        | 0.1186799           | 0           | 0.1793849         |
| 0                  | 0.0464190         | 0                 | 0.1430445         | 0.181965335         | 0.1738906   | 4.0953060         |
| 0.04034202         | 0                 | 0.05067124        | 0.1595380         | 0.08248842          | 0.06870698  | 0                 |
| 0.1138750          | 0.2728709         | 0                 | 0.04285774        | 0                   | 0.05667294  | 0.1233303         |
| 0.09256319         | 0.06673791        | 0.1115094         | 0                 | 0.04583527          | 0           | 0                 |
| 0.04727164         | 0.0665575         | 0.08168024        | 0                 | 0.04053054          | 0           | 0                 |
| 0.09347726         | 0.07187439        | 0.05262657        | 0                 | 0.08248817          | 0.1146864   | 0.1907930         |
| 0                  | 0                 | 0                 | 0.1049506         | 0.1103086           | 0.08116588  | 0.08031932        |
| 0                  | 0                 | 0                 | 0.06087407        | 0                   | 0.1319505   | 0.03723555        |
| 0.07371344         | 0                 | 0.09281715        | 0.0490506         | 0                   | 0.1400509   | 0.2918518         |
| 0.06172476         | 0.2480260         | 0.1274476         | 0.4278565         | 0.05580261          | 0.0613913   |                   |
| 0.1260034          |                   |                   |                   |                     |             |                   |
| AL450998.3         | 0.2221456         | 0.07941795        | 0.06704145        | 0.06193182          | 0.163194719 |                   |
| 0.3447199          | 0.07895695        | 0.2576148         | 0.01706989        | 0.1174782           | 0.3121028   |                   |
| 0.148102082        | 0.2844963         | 0.069231072       | 0.088638556       | 0.8261368           | 0.2580618   |                   |
| 0.3898190.02145023 | 0.3650406         | 0.22554345        | 0.2176987         | 0.5471684           |             |                   |
| 0.2943877          | 0.4721268         | 0.6624667         | 0.1637056         | 0.4016021           | 0.1946127   |                   |
| 0.107196542        | 0.1950752         | 0.33585497        | 0.2493359         | 0.4196245           | 0.2117068   |                   |
| 0.252300968        | 0.3286593         | 0.2322010.5731265 | 0.09995019        | 0.03198961          |             |                   |
| 0.1395181          | 0.2996509         | 0.6672094         | 0.3195990.3254023 | 0.2667490.1073278   |             |                   |
| 0.1877557          | 0.2601208         | 0.2702985         | 0.1882744         | 0.1379017           | 0.307609199 |                   |
| 0.1676237          | 0.3967341         | 0.4618704         | 0.3486279         | 0.3318808           | 0.2976117   |                   |
| 0.7638977          | 0.1974933         | 0.1102421         | 0.1503961         | 0.2147620.105841555 |             |                   |
| 0.1618355          | 1.1791750.3541987 | 0.130658394       | 0.3118339         | 0.1365315           |             |                   |
| 0.2492819          | 0.210847298       | 0.5196677         | 0.2328026         | 0.4119051           | 0.4626707   |                   |
| 0.4348755          | 0.2207853         | 0.3097616         | 0.2869327         | 0.06140122          | 0.04101223  |                   |
| 0.018758693        | 0.2108006         | 0.2454745         | 0.3882195         | 0.08947616          | 0.1933646   |                   |
| 0.1441728          | 0.199563278       | 0.2631776         | 0.2692030.1098702 | 0.377571104         |             |                   |
| 0.2494071          | 0.09713859        | 0.06044709        | 0.4005667         | 0.1390236           | 0.1323612   |                   |
| 0.3346497          | 0.2389849         | 0.3407116         | 0.1769191         | 0.255266194         | 3.508401    |                   |
| 0.207490259        | 0.08490623        | 0.5895269         | 0.2746564         | 0.2379815           | 0.2320651   |                   |

|             |             |             |             |             |             |
|-------------|-------------|-------------|-------------|-------------|-------------|
| 0.1871475   | 0.1063411   | 0.09449936  | 0.1877094   | 0.1704511   | 0.2145694   |
| 0.2952703   | 0.3963127   | 0.2689117   | 0.4684695   | 0.2712124   | 0.148366    |
| 0.0677957   | 0.1104479   | 0.34160163  | 0.1232823   | 0.1687460   | 0.2707994   |
| 0.2662697   | 0.124395761 | 0.5478988   | 0.1683309   | 0.09866206  | 0.1096085   |
| 0.04358911  | 0.1536669   | 0.1516927   | 0.2458530   | 0.1851057   | 0.1117247   |
| 0.05833314  | 0.2434513   | 5.4328050   | 0.3806948   | 0.1150342   | 0.1830029   |
| 0.1189623   | 0.07292964  | 0.2668303   | 0.206937726 | 0.1534235   | 0.380114    |
| 0.1225885   | 0.2753465   | 0.3063338   | 0.2060446   | 0.2359797   | 0.3295824   |
| 0.2062630   | 0.264288819 | 0.2996787   | 0.1960981   | 0.2369336   | 0.3758498   |
| 0.1714882   | 0.3808364   | 0.2845997   | 0.05425431  | 0.1755002   | 0.391548604 |
| 0.2512203   | 0.1999835   | 0.2359002   | 0.1309566   | 0.2882633   | 0.1855766   |
| 0.6650985   | 0.2635893   | 0.1474199   | 0.2610310   | 0.2122187   | 0.2739495   |
| 0.05640169  | 0.2007162   | 0.1968620   | 0.1676745   | 0.09363119  | 0.5872234   |
| 0.093938612 | 0.3593957   | 0.1973464   | 0.2802618   | 0.2938523   | 0.2837871   |
| 0.4395693   | 0.219133085 | 0.4173      | 0.1505965   | 0.1739132   | 0.1448824   |
| 0.05630221  | 0.2841771   | 0.2905652   | 0.3643391   | 0.5052007   | 0.3066907   |
| 0.4844811   | 0.1659104   | 0.09600202  | 0.6982454   | 0.2277135   | 0.5018723   |
| 0.1353980   | 0.3237079   | 0.273094572 | 0.230355604 | 0.7216301   | 0.147556369 |
| 0.072028369 | 0.1784807   | 0.199089531 | 0.2576393   | 0.2858534   | 0.3323875   |
| 0.202980251 | 0.6454440   | 0.2185340   | 0.3122481   | 0.292611694 | 0.06903736  |
| 0.2354437   | 0.2829926   | 0.1766534   | 0.6508257   | 0.2732181   | 0.6351107   |
| 0.2182194   | 0.1800377   | 0.2765882   | 0.155030889 | 0.3532352   | 0.108009408 |
| 0.2508927   | 0.2742807   | 0.1572406   | 0.2114868   | 0.1686415   | 0.465141    |
| 0.1233778   | 0.1643497   | 0.3817204   | 0.260670146 | 0.2332542   | 0.6126057   |
| 0.2356929   | 0.1271404   | 0.1956646   | 0.07301697  | 0.1724685   | 0.2972792   |
| 0.1594871   | 0.7505894   | 0.1088629   | 0.09965739  | 0.04809963  | 0.01386723  |
| 0.36277429  | 0.1876911   | 0.2479853   | 0.2853690   | 0.2894994   | 0.4755222   |
| 0.2153238   | 0.1096380   | 0.06314555  | 0.3105845   | 0.2975353   | 0.31409435  |
| 0.11894799  | 0.1809684   | 0.1502681   | 0.1365498   | 0.5012906   | 0.09285635  |
| 0.02658559  | 0.08682887  | 0.08432796  | 0.5005371   | 0.1669115   | 0.4112012   |
| 0.3703294   | 0.2299079   | 0.9951715   | 0.3387098   | 0.09051849  | 0.5298388   |
| 0.09023649  | 0.214333955 | 0.4947017   | 0.4121170   | 0.1321662   | 0.07892746  |
| 0.05107866  | 0.1399830   | 0.7255231   | 0.04200873  | 0.5634386   | 0.2064998   |
| 0.3765322   | 0.261105407 | 0.05895359  | 0.3597733   | 0.1426167   | 0.1614133   |
| 0.1536232   | 0.277381522 | 0.1739591   | 0.09979708  | 0.6125461   | 0.1391145   |
| 0.1511786   | 0.2228802   | 0.216662019 | 0.2282375   | 0.4165730   | 0.2054736   |
| 0.1626910   | 0.188747424 | 0.1268123   | 0.2234952   | 0.1931601   | 0.409598542 |
| 0.253223319 | 0.1702383   | 0.3636401   | 0.1413303   | 0.1915588   | 0.1816197   |
| 0.1814358   | 0.2745186   | 0.06390774  | 0.2249490   | 0.2755968   | 0.11613     |
| 0.081219687 | 0.02956783  | 5.6404620   | 0.1861072   | 0.1337629   | 0.1958220   |
| 0.1898915   | 0.1486060   | 0.2103912   | 0.5782950   | 0.2599768   | 0.1259377   |
| 0.4404830   | 0.3305867   | 0.1078711   | 0.2404842   | 0.1272409   | 0.9251035   |
| 0.4167928   | 0.2714997   | 0.3069137   | 0.1872405   | 0.1279848   | 0.1997555   |
| 0.1519770   | 0.3005768   | 0.08325291  | 0.2118202   | 0.5247486   | 0.3375929   |

|            |            |             |             |               |               |
|------------|------------|-------------|-------------|---------------|---------------|
| 0.2206861  | 0.2916619  | 0.1569052   | 0.1447255   | 0.3351094     | 0.7774435     |
| 0.4610569  | 0.1192094  | 0.4033030   | 0.3087220   | 0.3078507     | 0.1788320     |
| 0.4541862  | 0.5067126  | 0.3281153   | 0.2270404   | 0.1232090     | 0.1338411     |
| 0.2813481  | 0.08280719 | 0.1434012   | 0.3373389   | 0.2543858     | 0.1323927     |
| 0.1347934  | 0.1064711  | 0.2173677   | 0.4800405   | 0.3533742     | 0.2279311     |
| 0.2831072  | 0.2857033  | 0.09400507  | 0.2031545   | 0.3077557     | 0.3127656     |
| 0.2068745  | 0.1607434  | 0.5955072   | 0.2046621   | 0.1054340     | 0.5326676     |
| 0.08668319 | 0.3769846  | 0.6120086   | 0.17224     | 0.5034932     |               |
| AC079313.2 | 0.1762677  | 10.672690   | 1.297658    | 7.672038      | 785 0.067688  |
|            |            |             |             |               | 719 0.2237954 |
| 3.9823015  | 0.078594   | 12.74422    | 17.98714    | 1.340206      | 0.409524      |
|            |            |             |             |               | 698 1.350911  |
| 12.823581  | 616        | 0.2327495   | 0.0755553   | 0.3695687     | 0.01779394    |
|            |            |             |             |               | 0.01552912    |
| 0          | 0.1389161  | 0.05043345  | 0           | 0.02175837    | 0.7672910     |
|            |            |             |             |               | 0             |
| 0.022231   | 1101       | 0.7484348   | 0.0337705   | 41 0.09401611 | 0.02109682    |
|            |            |             |             |               | 0.4052779     |
| 0.069765   | 04         | 0.807008    | 0.03210354  | 0.08268426    | 1.492438      |
|            |            |             |             |               | 0.6103473     |
| 0.038242   | 16         | 0.6687889   | 0.03119081  | 0             | 0.1408148     |
|            |            |             |             |               | 0.05087617    |
| 0.1176993  |            | 0.1569574   | 0.05432423  | 0.02859892    | 0.042529302   |
|            |            |             |             |               | 0.02528208    |
| 0.023946   | 41         | 0.04957761  | 0.03441378  | 2.8846270     | 0.3276593     |
|            |            |             |             |               | 0             |
| 0.0254507  |            | 0.234134349 | 0.02684998  | 0.01811442    | 0.04701183    |
|            |            |             |             |               | 0.457634325   |
| 0.049272   | 45         | 0.05662956  | 0.03938869  | 0             | 0.1337859     |
|            |            |             |             |               | 0.02758862    |
| 0.4509362  |            | 0           | 0.5383951   | 0             | 0.6876239     |
|            |            |             |             |               | 0.04082581    |
| 0.1368537  |            | 0.2506244   | 0.02012786  | 0.04948303    | 0.2444263     |
|            |            |             |             |               | 0.1594638     |
| 0.156833   | 82         | 0.01819315  | 0.02881499  | 0             | 0             |
|            |            |             |             |               | 0.06365986    |
| 0.2005744  |            | 0.07120464  | 0.1153264   | 0.1397450     | 0.08766541    |
|            |            |             |             |               | 0             |
| 0.088231   | 212        | 0.2116638   | 0.430306502 | 0             | 0.02876702    |
|            |            |             |             |               | 1.4619730     |
| 0.031049   | 47         | 0.05040843  | 0           | 0.02224478    | 0.02019957    |
|            |            |             |             |               | 0.08215155    |
| 0          | 0.2726466  | 0.01523987  | 0           | 0.4430748     | 0.3599335     |
|            |            |             |             |               | 3.4030860     |
| 0.015733   | 58         | 0.03732865  | 0.1078274   | 1.3032080     | 0.165107101   |
|            |            |             |             |               | 0.1056993     |
| 0.3351315  |            | 0.1227670   | 0.04041122  | 0.0482122     | 0.2185263     |
|            |            |             |             |               | 0             |
| 0.139021   | 0.09677999 | 0           | 0.1099209   | 0             | 0.04771304    |
|            |            |             |             |               | 0.1349416     |
| 0.072598   | 14         | 0.05208185  | 0           | 0             | 0             |
|            |            |             |             |               | 0.04568249    |
| 1.128475   | 0.05468072 | 0.09777401  | 0.285011465 | 0.0276219     | 0.02711204    |
|            |            |             |             |               | 0             |
| 0.023709   | 54         | 0.4575409   | 0.3563598   | 0.02250321    | 4.2401760     |
|            |            |             |             |               | 0.029527942   |
| 0.032061   | 33         | 0.3041416   | 0           | 0             | 0.06376735    |
|            |            |             |             |               | 0.2463107     |
| 0.672603   | 3          | 0.1202984   | 0.9941374   | 0.3694670     | 0.04678777    |
|            |            |             |             |               | 0             |
| 0.025890   | 44         | 0.02783592  | 0.044529342 | 0.8555179     | 1.4938340     |
|            |            |             |             |               | 0.1367588     |
| 0.162509   | 2          | 0.09912181  | 0.1121977   | 0.040395745   | 0.0461559     |
|            |            |             |             |               | 0.02498533    |
| 0.206034   | 1          | 7.052491652 | 0.4576087   | 0.4820741     | 0.1511179     |
|            |            |             |             |               | 0             |
| 0.091753   | 49         | 0.04900802  | 0           | 0.6182139     | 0.02685974    |
|            |            |             |             |               | 0.01727982    |
| 0          | 0          | 0.1056397   | 0           | 0.119501613   | 0.7061220     |
|            |            |             |             |               | 0.06749163    |
| 0.140317   | 787        | 0.03245001  | 0.05438516  | 0             | 0.091025513   |
|            |            |             |             |               | 0.0763595     |
| 1.475685   | 0.01380913 | 0.0325649   | 0           | 0.2266469     | 0             |
|            |            |             |             |               | 0.07240917    |
| 0.047470   | 87         | 0.023382758 | 0.1172098   | 0.134398071   | 0.4963026     |
|            |            |             |             |               | 1.183147      |
| 0.016304   | 78         | 0.2631568   | 0           | 0.01978747    | 0.5556006     |
|            |            |             |             |               | 1.4542460     |
| 0.038698   | 99         | 0.02823246  | 0.0782072   | 0.03835227    | 0.4773902     |
|            |            |             |             |               | 0.04038059    |

0.2341154 0.04932133 0.1089544 0 0 0.3543014 0.3990083  
0.06902098 0.01941534 0 0.04571446 0.06175476 0.01500956 0 0  
0.04547485 0 0.05152879 0.0519619 0.022657004 0.056384437 0.2064170  
6.4440470.8085843 0.2310857 1.4996690.8643419 0.1165898 0.3229476  
0.04615355 0.2558326 0.04850606 0.09950561 1.1155950.1465958  
0.3003568 0.03447257 0.1924850 0.02218257 0 0.7987901 0  
0.02824805 0.1625712 0.1301307 0.1045445 0.01988928 0.1142006 0  
0.034655809 4.6703980 0.1051618 0.1441997 0.06951132 0.460201161  
0.6349509 0.04967173 0 0.05770089 0.1839339 0 0.253737872  
0.3786668 0.02383215 0.06391864 0.04763279 0.104383045 0.2103932  
0.03370899 0.2330693 0 0 0.1294521 0.03093908 0.07034396  
0.09778878 0.1004412 0.2580159 0.02530285 0.1060287 0.1767841 0  
0 0.04035382 0.115500724 0.2943343 0.6065396 0.05613979 0.119498  
0.3682046 0.1500944 0 0.1408862 0 0.05814812 0 0 0.2730617  
0.08597662 0.1154681 0.04130029 0.01813569 0 0 0.01304712  
0.3096794 0.2741834 0.5648165 0 0.07647983 0.0969783 0.02933436  
0.1381241 0 0 0.04000695 0 0 0.02002461 0.06860364 13.40886  
0.06291948 0 0.05933378 0.1216575 0 0.02128135 0.1396228  
0.1213268 0.0269120.02335229 0.3559363 0 0.1257938 0.1332327  
0.0233391 0.1030385 0.9176743 0 0.147717258 0.04881147 0.027954328  
0.08832261 0.1030379 0 0.3210581 0.1418094 0.1174251 0.2962549  
1.9339410.07610848 0.4909565 0.04151252 0.019067984 0 0.09880006  
0.02611946 0 0.01699507 0.05393074 0 0 0.9611990.1244125  
ZFAS1 29.969449.59380721.4743611.767156233 19.99997942 34.3569321.30494  
28.326459.34493215.4790836.4759523.742135007 26.6854542.906733057  
12.261569415 38.1925149.3538369.0549748.0200465.2257842.419235446  
15.5083233.1099723.2963384.7661522.2625835.9574237.3771632.70936  
73.044717822 45.5225 13.869981293 102.045250.6326144.07573  
23.041965162 26.9011325.3391 54.0728541.7613570.2368481.3898128.48286  
33.1177826.9957536.3489561.0663 66.4275 60.3390548.9385538.0098749.81515  
30.0187 38.123243649 83.5796686.9784836.6177 41.1872139.8081652.27524  
54.2085656.6524928.9544 18.5592441.2035818.325736182 142.584849.26548  
43.9037329.20101521 75.63938100.592340.2326325.395844416 33.3555447.4606  
27.4180980.4658732.90781106.6596101.187151.2165911.37258126.164  
49.526787666 16.2991244.8725424.6924974.0567 27.0669977.45772  
26.288042523 68.5234616.9804419.8711958.239701037 34.747554.99331  
54.4782749.0734953.0873833.3070431.8281372.6847536.1988842.27779  
20.935697336 14.7140823.212724075 50.2539655.6737723.6757554.32535  
40.1077939.8688540.56573171.165 29.9103217.4079 109.806653.4473630.1361  
103.821181.2692237.7422463.00116119.305 36.6541723.305892366 135.2932  
65.9232322.8907536.0966444.652232702 24.6103 37.5169522.9604467.69638  
58.7287730.7873740.9312236.0545671.7893828.4724724.9476239.2611821.64467  
13.7418691.1613 44.5823390.3173740.9721569.7181152.707583054 53.17837  
59.7938723.761225703 46.1249394.6528196.2124 19.7144332.0089271.35219



20.537715639 49.7936119.2437727.1471842.6350274.7769530.9471448.23907  
74.4764520.8783331.261441778 54.3493237.4277240.9812918.7868 30.38649  
24.5043548.8748 25.3655 20.2014930.4575529.9641727.83821145.510169.56155  
27.5030472.04442118.355323.8742146.052074848 33.5555371.9491522.98572  
26.8534778.1544874.3982647.751229028 19.0613837.5888 29.3921 52.00032  
46.099386404 23.8095335.6964831.6244 31.8283163.1539625.2249740.96325  
51.2340517.7140563.3143340.7517457.2745794.4599825.088752736  
14.607578946 72.3125612.98199416 33.485214949 78.4640954.972143352  
36.8297966.1259828.0204326.994314604 54.0189734.3302 81.40028  
15.236607611 77.9641153.4003848.9543 39.3938931.4046436.7841127.56187  
46.0330462.1782 33.3678625.5786552.015430094 41.3636323.687015844  
33.4904 27.0004635.9949497.1085831.7309925.6524944.3061 60.5626638.31959  
39.143753922 30.7600620.5275 90.94949112.640153.5308772.2612147.4073  
15.6447327.7444735.2853124.2555 21.1049353.60131119.333653.283447567  
13.7002358.5486746.3173449.0386679.9948932.2817231.5749575.4607730.80066  
47.7131277.281493466 37.663345724 40.3289 56.5889126.3180155.92188  
31.0654215.7808 14.2425755.4254347.2283820.87614121.889132.3575 36.88522  
103.035 48.7044387.8802835.6656163.8844226.350715869 23.5031245.05674  
28.98956149.424170.3789748.4678116.39037137.326 46.9806899.9583519.65057  
37.782494806 31.9418 41.4479265.2092763.9937970.0986524.139735985  
34.8002970.7855144.6707573.1515 20.5202422.7940526.767592086 27.98809  
62.5774778.0455928.8512429.046781144 50.74593178.453639.37712  
19.766486123 12.528194561 44.4703329.499 29.4900248.1392856.15837  
49.4776335.8358779.0578328.4101914.7474223.2005272.4626417.866412047  
49.8137640.9061356.6719528.4039758.9594 26.2163915.1660954.85301120.3699  
50.9501970.4596654.0626658.91688102.322417.1716553.7175621.2847833.58054  
94.3170431.7270829.2835589.3833 20.83606118.525233.0810219.4796421.95707  
79.2389535.0344825.7850585.2221853.4518576.1831471.9899476.1143525.36886  
73.9355820.9312 26.3815548.3374622.7053328.0099732.5404655.4882 84.44476  
86.7910552.7599747.948462386 25.89084126.756923.34401100.725650.46759  
34.88006514 18.942318105 24.3907653.548179111 160.042688.94621  
12.7954418.6025632.9867821.5357 30.33143117.022552.4307721.0904947.99399  
35.096243376 95.4209 61.7325 80.2793687.7401 38.2679736.8204330.16583  
45.9625159.1806123.27551

AC027449.1 0.2546571.4956720.5471208 1.399628697 0.461015058 0.3387174  
2.5576232.6255940.7072471 3.0974420.8989589 0.433874815 0.7020692  
2.503341127 2.804462927 0.7045391 0.2858858 0.4195104 0.2423824 0  
0 0.06307543 0 0.1584052 0 0.1412398 0.1541528 0.1890835 0  
0.100941216 1.0562280.038334128 0 0.2394775 0.06133935 0.039596374  
0.1485508 0 0 0.8784320 0 0 0.2617813 0 0 0 0 0 0  
0.05090512 0 0 0 0 0.09640855 0 0 0 0.1769968 0 0 0  
0.06294218 0 0.132887063 0.3047835 0 0.3735535 0.492135917  
0.05593089 0 0 0.244361299 0.0337478 0 0.1108197 0 0.2047494  
0 0.0555592 0 0.1156365 0 0 0 0.4623003 0.04569567

|                    |                    |             |                   |                    |                    |             |             |             |            |             |
|--------------------|--------------------|-------------|-------------------|--------------------|--------------------|-------------|-------------|-------------|------------|-------------|
| 0.05616992         | 0.2080926          | 0.04525325  | 0                 | 0.1239101          | 0                  | 0           | 0           | 0           | 0          | 0           |
| 0                  | 0                  | 0.1359681   | 0.1326828         | 0                  | 0                  | 0.2379932   | 0.08012348  | 0.2402671   |            |             |
| 0.244228015        | 0.07995162         | 0           | 0.3879437         | 0.07469812         | 0.03642054         | 0           |             |             |            |             |
| 0.1144408          | 0                  | 0           | 0.5503017         | 0                  | 0                  | 0           | 0           | 0           | 0.05588331 |             |
| 0.1532151.1886040  | 0.03571947         | 0.04237307  | 0.2039978         | 0                  | 0.187418871        | 0           |             |             |            |             |
| 0.06340326         | 0                  | 0.04587219  | 0                 | 0                  | 0                  | 0           | 0           | 0.05492918  | 0          | 0           |
| 0                  | 0                  | 0           | 0                 | 0.05911993         | 0                  | 0           | 0.05726927  | 0.046173998 | 0.1037116  |             |
| 0.3146815          | 0                  | 0.3137074   | 0.06207001        | 0.1109867          | 0                  | 0           | 0           | 0           | 0          | 0           |
| 0.2473194          | 0.06067747         | 0.05108837  | 0.08262957        | 0                  | 0                  | 0           | 0           | 0           | 0          |             |
| 0.1397980.04817596 | 0                  | 0.3701797   | 0                 | 0.4231799          | 1.3836230.1593313  | 0           |             |             |            |             |
| 0.1308525          | 0                  | 0           | 0                 | 0.05885627         | 0                  | 0           | 0           | 0.2250333   | 0          | 0           |
| 0.2268938          | 0                  | 0.07795885  | 2.014636957       | 0.09444505         | 0                  | 0.1143595   | 0           | 0           |            |             |
| 0                  | 0.1041526          | 0           | 0                 | 0                  | 0                  | 0           | 0           | 0.113172249 | 0          | 0.101051559 |
| 0.054260192        | 0.3102751          | 0           | 0                 | 0.6460146          | 0                  | 0.06371186  | 0           | 0.04115633  |            |             |
| 0                  | 0.068884172        | 0           | 0                 | 0.5419447          | 0.06270093         | 0           | 0.1065822   | 0.1029099   |            |             |
| 0                  | 0.7397477          | 0           | 0.2514673         | 0.212340722        | 0                  | 0           | 0.2544254   | 0.03443672  |            |             |
| 0                  | 0.1991457          | 0           | 0                 | 0.1327751          | 0.5158643          | 0           | 0.607803363 | 0.08785718  |            |             |
| 0                  | 0                  | 0           | 0.1734088         | 0.04583743         | 0.1181123          | 0           | 0.1766829   | 0           | 0          |             |
| 0.1608720.09058567 | 0.05223209         | 0           | 0                 | 0.3113525          | 0.2336667          | 0           | 0           | 0           |            |             |
| 0                  | 0                  | 0.1169843   | 0                 | 0                  | 0.064003955        | 0.04260204  | 0           | 0.8572106   |            |             |
| 0.2622436          | 0.05829188         | 0.1502053   | 0.2725403         | 0                  | 0.1047397          | 0           |             |             |            |             |
| 0.06453434         | 0.03670729         | 0.03765077  | 0.3039241         | 0                  | 0.05682426         | 0           |             |             |            |             |
| 0.04855477         | 0.047488648        | 0           | 0                 | 0.5333734          | 0                  | 0           | 0.05272579  | 0           | 0          |             |
| 0.04515403         | 0                  | 0.03636514  | 0                 | 1.2768090.08469478 | 0.1790593          | 0.1403024   |             |             |            |             |
| 0                  | 0.034826034        | 0           | 0                 | 0.1964949          | 0.2657325          | 0           | 0           | 0.1357383   | 0          |             |
| 0.2902252          | 0.2883715          | 0           | 0                 | 0.07652852         | 0.2645651          | 0.067077723 |             |             |            |             |
| 0.105976344        | 0.05343476         | 0           | 0.05323326        | 0.05550174         | 0                  | 0           | 0           | 0.1444283   |            |             |
| 0.1337825          | 0.06106228         | 0.06729441  | 0                 | 0.39332679         | 0                  | 0.1967155   | 0           |             |            |             |
| 0.1550244          | 0.0491720.04867925 | 0           | 0.1999061         | 0                  | 0                  | 0           | 0           | 0           | 0          |             |
| 0.06553595         | 0                  | 0           | 0                 | 0                  | 0.2556567          | 0           | 0           | 0           | 0.1736299  | 0           |
| 0.06271583         | 0.08864876         | 0           | 0                 | 0                  | 0.03923461         | 0           | 0           | 1.1137220   | 0          | 0           |
| 0                  | 0                  | 0           | 0                 | 0                  | 0.0530160.04753362 | 0           | 0.1784912   | 0           | 0          | 0           |
| 0.1157427          | 0                  | 0           | 0.1662228         | 0                  | 0                  | 0           | 0.03169081  | 0.03577175  |            |             |
| 0.3199041          | 0.1345157          | 0.2124468   | 0                 | 0.1337525          | 0                  | 0           | 0.4709083   | 0           |            |             |
| 0                  | 0.3971260          | 0           | 0                 | 0                  | 0.3538673          | 0.04035     |             |             |            |             |
| AL035530.2         | 0.2049078          | 0.4056177   | 0.4389823         | 0.37308287         | 0.208374395        |             |             |             |            |             |
| 0.4710677          | 0.5707725          | 0.6429846   | 0.4560312         | 0.3428606          | 0.2163839          |             |             |             |            |             |
| 0.271533136        | 0.4470864          | 0.293751235 | 0.543253033       | 0.2449576          | 0.4532557          |             |             |             |            |             |
| 0.3063007          | 0.2696727          | 0.1985753   | 0.177220968       | 0.05263291         | 0.1194272          |             |             |             |            |             |
| 0.1652253          | 0.3091451          | 0.1571423   | 0.3858955         | 0.4260049          | 0.140174           |             |             |             |            |             |
| 0.063172334        | 0.3448811          | 0.991618021 | 0.1335790.3596949 | 0.1279606          |                    |             |             |             |            |             |
| 0.272587854        | 0.2375848          | 0.06081737  | 0.4699144         | 0.3926797          | 0.2010869          |             |             |             |            |             |
| 0.1694227          | 0.2173394          | 0.5024162   | 0.1477207         | 0.07159184         | 0.4573054          |             |             |             |            |             |
| 0.4578073          | 0.01552939         | 0.1486474   | 0.1380518         | 0.1157766          | 0.05417818         |             |             |             |            |             |

|             |             |             |             |             |             |
|-------------|-------------|-------------|-------------|-------------|-------------|
| 0.171207144 | 0.2394736   | 0.2916223   | 0.1701164   | 0.07044035  | 0.2200294   |
| 0.1846174   | 0.07319918  | 0.1884335   | 0.08662284  | 0.1969564   | 1.458478    |
| 0.304938688 | 0.1271624   | 0.5404802   | 0.5120940   | 0.159701034 | 0.2566915   |
| 0.1340997   | 0.09327307  | 0.382323354 | 0.3660884   | 0.1567928   | 0.3236548   |
| 0.06491855  | 0.1388172   | 0.3469644   | 0.2202149   | 0.3945508   | 0.06030758  |
| 0.6251727   | 0.058958639 | 0.1656368   | 0.2077189   | 0.1620545   | 0.105459    |
| 1.2444320   | 0.2265678   | 0.115542018 | 0.04308168  | 0.2524672   | 0.2589919   |
| 0.166880719 | 0.3165699   | 0.1526535   | 0.4116351   | 0.1011683   | 0.1092379   |
| 0.25528     | 0.2352722   | 0.08836827  | 0.1554471   | 0.2184511   | 0.183861004 |
| 0.8270187   | 0.448348056 | 0.1834666   | 0.2043623   | 0.1438743   | 0.1714113   |
| 0.1063681   | 0.07352566  | 0.2029256   | 0.1856324   | 0.2844504   | 0.5644283   |
| 0.1556290   | 0.07138735  | 0.1499348   | 0.2347752   | 0.1660060   | 0.1649848   |
| 0.1865259   | 0.2876609   | 0.3347403   | 0.236835695 | 0.1788354   | 0.1149133   |
| 0.2468258   | 0.1150719   | 0.488720403 | 0.09010716  | 0.05290647  | 0.1938095   |
| 0.2679444   | 0.2414878   | 0.1112465   | 0.09658959  | 0.3345280   | 0.2304428   |
| 0.1260471   | 0.1071236   | 2.3426510   | 0.04431575  | 0.05649263  | 0.1118403   |
| 0.04673738  | 0.2177572   | 0.1973291   | 0.149051378 | 0.1205526   | 0.3106220   |
| 0.375663694 | 0.2271714   | 0.2625840   | 0.1618997   | 0.1963284   | 0.2201242   |
| 0.3009896   | 0.488013165 | 0.1962274   | 0.0256807   | 0.07978749  | 0.1243471   |
| 0.03368675  | 0.2373303   | 0.1814311   | 0.1492063   | 0.1723743   | 0.083907182 |
| 0.1062905   | 0.07856861  | 0.1685080   | 0.4115971   | 0.2189531   | 0.2527494   |
| 0.2311508   | 0.1380770   | 0.2123648   | 0.1367369   | 0.2452222   | 0.5577090   |
| 0.06647652  | 0.2456754   | 0.1903061   | 0.6130899   | 0.2504804   | 0.147624697 |
| 0.2210051   | 0.5524195   | 0.1295388   | 0.1924122   | 0.3403470   | 0.2302613   |
| 0.153052461 | 0.5464897   | 0.05916566  | 0.06832624  | 0.1626307   | 0.552993904 |
| 0.1116462   | 0.2568509   | 0.2624231   | 0.1508455   | 0.1506140   | 0.06852267  |
| 0.1303643   | 0.1508673   | 0.1175672   | 0.1789261   | 0.3053006   | 0.3191673   |
| 0.5433922   | 0.160938229 | 0.070826917 | 0.5336673   | 0.158103476 | 0.135831254 |
| 0.582541    | 0.078217389 | 0.1278570   | 0.4342452   | 0.2203654   | 0.106327943 |
| 0.2151580   | 0.1401995   | 0.273029883 | 0.1084923   | 0.3560624   | 0.5961114   |
| 0.2354418   | 0.07711422  | 0.2112250   | 0.2146814   | 0.3190576   | 0.2914924   |
| 0.1581077   | 0.2997648   | 0.088593207 | 0.3885768   | 0.127302734 | 0.4321897   |
| 0.2442519   | 0.1389960   | 0.2492639   | 0.03975307  | 0.1874282   | 0.1384917   |
| 0.2690374   | 0.3239321   | 0.468164117 | 0.09163985  | 0.1470808   | 0.2160619   |
| 0.4540941   | 0.2351373   | 0.2008060   | 0.2587149   | 0.2102287   | 0.4054378   |
| 0.07692734  | 0.09775896  | 0.2349177   | 0.09448582  | 0.1416504   | 0.468953594 |
| 0.09586101  | 0.1082526   | 0.1754835   | 0.09241149  | 0.1932631   | 0.1329357   |
| 0.08614815  | 0.05788612  | 0.3294568   | 0.18457     | 0.321912935 | 0.080111563 |
| 0.4088137   | 0.03935777  | 0.3934118   | 0.4485965   | 0.1702446   | 0.3237895   |
| 0.3354438   | 0.09939116  | 0.6664207   | 0.06557542  | 0.0942380   | 0.3369319   |
| 0.2356309   | 0.3381435   | 0.08099961  | 0.2133750   | 0.08979479  | 0.1519359   |
| 0.158506444 | 0.2941607   | 0.2009925   | 0.1631924   | 0.1612450   | 0.1872972   |
| 0.4179688   | 0.3235592   | 0.1650420   | 0.1601336   | 0.3109933   | 0.1289648   |
| 0.073858971 | 0.5211320   | 0.1413461   | 0.1494149   | 0.09756204  | 0.1097360   |
| 0.167097131 | 0.2323705   |             |             |             |             |

|            |             |             |             |             |             |
|------------|-------------|-------------|-------------|-------------|-------------|
| 0.4626523  | 0.2279883   | 0.1776276   | 0.2850929   | 0.2547320   | 0.140199603 |
| 0.3114815  | 0.3950445   | 0.3229021   | 0.3083069   | 0.06591487  | 0.2158929   |
| 0.1596469  | 0.1655735   | 0.181910934 | 0.077377397 | 0.1839268   | 0.293057    |
| 0.3442563  | 0.04631309  | 0.2021695   | 0.1018310   | 0.1078516   | 0.1606898   |
| 0.1767538  | 0.1783356   | 0.04913423  | 0.0573351   | 0.109403044 | 0.1510142   |
| 1.6619990  | 0.4254078   | 0.1131893   | 0.1333516   | 0.2031005   | 0.04263069  |
| 0.1501294  | 0.2314411   | 0.05507828  | 0.2507036   | 0.04947783  | 0.4792555   |
| 0.1628752  | 0.1777297   | 0.1043198   | 0.1975498   | 0.02856562  | 0.3520926   |
| 0.4201827  | 0.1599984   | 0.2597083   | 0.08024969  | 0.0893904   | 0.2294003   |
| 0.06430094 | 0.1250357   | 0.2878306   | 0.3328758   | 0.1632107   | 0.3221062   |
| 0.2134207  | 0.2291736   | 0.2181256   | 0.3898909   | 0.4027133   | 0.08939662  |
| 0.1207586  | 0.2622729   | 0.2160652   | 0.4218758   | 0.1209470   | 0.4628808   |
| 0.5401312  | 0.2804035   | 0.3539110   | 0.07932828  | 0.291922809 | 0.2308584   |
| 0.1577486  | 0.1547487   | 0.01626646  | 0.20121     | 0.170398531 | 0.149912953 |
| 0.1964968  | 0.211828183 | 0.1394329   | 0.3415937   | 0.3771922   | 0.1189989   |
| 0.1268604  | 0.4560260   | 0.3273836   | 0.1329562   | 0.08753841  | 0.1581127   |
| 0.3440582  | 0.189643852 | 0.2385747   | 0.2924502   | 0.1855539   | 0.2485345   |
| 0.2656145  | 0.3150152   | 0.09354189  | 0.1453842   | 0.2952824   | 0.4545424   |
| AC004846.2 | 0.2477276   | 0.1958618   | 0.2204516   | 0.203649678 | 0.221360405 |
| 0.3844173  | 0.03115598  | 0.08969419  | 0           | 0.03311163  | 0.1086654   |
| 0.1741976  | 0.382454894 | 0.104928885 | 0.1845222   | 0.1197998   | 0.512735    |
| 0.1269622  | 0.4062753   | 0.242722435 | 0.1321581   | 0.5797575   | 0.3733837   |
| 0.1034993  | 0.3452529   | 0.4239201   | 0.8319676   | 0.3199713   | 0.26436985  |
| 0.2886586  | 0.120478687 | 0.1118029   | 0.2759693   | 0.1606507   | 0.228150537 |
| 0.1296872  | 0.4199491   | 0.7374542   | 0.2629320   | 0.1893439   | 0.3002895   |
| 0.2728630  | 0.1919730   | 0.2596424   | 0.3081648   | 0.4784442   | 0.2420056   |
| 0.1866223  | 0.2399813   | 0.1938054   | 0.1360381   | 0.227589238 | 0.2705866   |
| 0.2272487  | 0.7973506   | 0.6485287   | 0.2455469   | 0.3399463   | 0.5513961   |
| 0.05566414 | 0           | 0.8242428   | 0.1210628   | 0.556860073 | 0.1915782   |
| 0.1677179  | 0.085928494 | 0.3222684   | 0.1346865   | 0.6557685   | 0.191998163 |
| 0.6187097  | 0.1640405   | 0.0870726   | 0.3260131   | 0.3485615   | 0.653405    |
| 0.2910244  | 0.1887035   | 0.1211429   | 0.09709923  | 0.037010394 | 0.09041388  |
| 0.1490199  | 0.4308449   | 0.5001798   | 0.4723372   | 0.2133367   | 0.082891148 |
| 0.1947159  | 0.1027994   | 0.2709637   | 0.605261787 | 0.2649626   | 0.03194197  |
| 0.07950698 | 1.1572360   | 0.2155135   | 0.07122141  | 0.4517533   | 0.05547184  |
| 0.3903183  | 0.1246631   | 0.272801372 | 1.51025     | 0.12792896  | 0.2093971   |
| 0.4105132  | 0           | 0.2347655   | 0.09538714  | 0.2584659   | 0.08991775  |
| 0.1322663  | 0.2642322   | 0.5535979   | 0.2240616   | 0.1158391   | 0.05895062  |
| 0.5255697  | 2.4338180   | 0.08781662  | 0.3477736   | 0.2490408   | 0.118936021 |
| 0.2993632  | 0.08878166  | 0.5342799   | 0.05253428  | 0.147257684 | 0.2262536   |
| 0.0996337  | 0.2919864   | 2.7392250   | 0.1433336   | 0.2165576   | 0.4189998   |
| 0.03464723 | 0.5112919   | 0.5786280   | 0.4028140   | 0.2497679   | 7.4072851   |
| 0.7659877  | 0.3209421   | 0.09779562  | 0.1438882   | 0.1238703   | 0.170117725 |
| 0.08648582 | 0.1799891   | 0.169304658 | 0.4074384   | 0.1648332   | 0.4065204   |

|                     |                   |                           |                           |                             |                  |
|---------------------|-------------------|---------------------------|---------------------------|-----------------------------|------------------|
| 0.3286458           | 0.2926157         | 0.4069513                 | 0.078215205               | 0.1642383                   | 0.1934481        |
| 0.2671221           | 0.4293135         | 0.5075123                 | 0.5441027                 | 0.1059448                   | 0.1338029        |
| 0.2164108           | 0.351143097       | 0.3812699                 | 0.2959215                 | 0.3384907                   | 0.1033496        |
| 0.4739465           | 0.3905467         | 0.3028203                 | 0.2426922                 | 0.2423796                   | 0.286115         |
| 0.4187018           | 0.1105558         | 0.5285753                 | 0.3046213                 | 0.1370836                   | 1.065967         |
| 0.4926182           | 0.6620434         | 0.185338343               | 0.2466358                 | 0.9733978                   | 0.2276849        |
| 0.6763896           | 0.2357492         | 0.2223739                 | 0.096076368               | 0.2744405                   | 1.753025         |
| 0.2859384           | 0.2450135         | 0                         | 0.5276930.5374475         | 0.1198052                   | 0.2591543        |
| 0.3529706           | 0.2485257         | 0.08183419                | 0.07284976                | 0.4920069                   | 0.2042148        |
| 0.2555305           | 0.3082346         | 0.4064244                 | 0.404106158               | 0.158081871                 | 1.172505         |
| 0.264658844         | 0.170532031       | 0.7042752                 | 0.196399132               | 0.5083153                   | 0.1503949        |
| 0.7992460.233610154 | 0.6174271         | 2.6085280.8800815         | 0.469068409               | 0.1362088                   |                  |
| 0.7058298           | 0.3612965         | 0.6568668                 | 0.2323550.8095170.5929572 | 0.1643352                   |                  |
| 0.1722164           | 0.1462628         | 0.1505382                 | 0.389291324               | 0.09292312                  | 0.372924377      |
| 0.6663523           | 0.1262680.1551158 | 0.6954294                 | 0.09981756                | 0.6353381                   |                  |
| 0.4520676           | 0.5404293         | 0.2108747                 | 0.171431718               | 0.4371941                   | 0.3693111        |
| 0.1705058           | 0.4788852         | 0.2270829                 | 0.3361412                 | 0.4021441                   | 0.2932619        |
| 0.1480771           | 0.9014129         | 0.1227334                 | 0.05617753                | 0.5219460.2462370.438681727 |                  |
| 0.2036702           | 0.05436314        | 0.4651079                 | 0.1070952                 | 0.6146778                   | 0.2427589        |
| 0.2433519           | 0.1661126         | 2.2672670.3089627         | 0.511925809               | 0.603465863                 |                  |
| 0.7587221           | 0.6917748         | 0.1197374                 | 0.6318821                 | 0.2442707                   | 0                |
| 0.3327536           | 0.2743184         | 0.1097706                 | 0.0338037                 | 0.6729670.2761057           | 0.171311         |
| 0.2122645           | 0.2760227         | 0.1785905                 | 0.1639777                 | 0.2797680.223875053         |                  |
| 0.6067233           | 0.2803778         | 0.1862574                 | 0.4048765                 | 0.3023305                   | 0.3314193        |
| 0.6963750.08288209  | 0.3311296         | 0.5092731                 | 1.1429040.144243095       | 0.2326277                   |                  |
| 0.3105475           | 0.5627577         | 0.4654475                 | 0.2204323                 | 0.510781829                 | 0.20593          |
| 0.4134836           | 0.5936672         | 0.2744691                 | 0.1789627                 | 0.1998802                   | 0.226306751      |
| 0.09480136          | 1.1619780.9374733 | 0.3021035                 | 0.517213286               | 3.3776630.6012955           |                  |
| 0.2078726           | 0.175679751       | 0.305312801               | 0.2519067                 | 0.53349                     | 0.6413341        |
| 0.7849532           | 0.2687481         | 0.3068297                 | 0.7522469                 | 0.2017412                   | 0.09343541       |
| 0.4158050.2291214   | 0.1919533         | 0.160244248               | 0.1458413                 | 1.0304150.2002825           |                  |
| 0.1827073           | 0.7984597         | 0.1784906                 | 0.2676077                 | 0.2722531                   | 0.2490577        |
| 0.4896124           | 0.4969433         | 0.4584311                 | 0.1022425                 | 0.7552238                   | 0                |
| 0.1725341           | 0.2510429         | 0.7129704                 | 0.3568563                 | 0.7365348                   | 0.1473416        |
| 0.1397383           |                   |                           |                           |                             |                  |
| 0.63809             | 0.9539290.3637959 | 0.1845209                 | 0.4186093                 | 0.1642557                   | 0.4179156        |
| 0.1294144           | 0.5233341         | 1.1722510.1438602         | 0.1428783                 | 0.2651438                   |                  |
| 0.2333512           | 0.3367043         | 0.2205219                 | 0.3527954                 | 0.3978529                   | 0.1324131        |
| 0.4808434           | 0.1245285         | 1.0965320.4800520.4720949 | 0.3236813                 | 0.203611254                 |                  |
| 0.2056899           | 0.1584389         | 0.2775461                 | 1.9605160.1818814         | 0.142620134                 |                  |
| 0.326232709         | 0                 | 0.398915816               | 0.1400431                 | 0.3982276                   | 1.8942140.929597 |
| 0.01873758          | 0.08378442        | 0.3288162                 | 0.2225633                 | 0.4654666                   | 0.116768         |
| 0.1974650.1133772   | 0.1057141         | 0.2056109                 | 0.1863659                 | 0.2496221                   |                  |
| 0.2829450.3634251   | 0.3523171         | 0.1123234                 | 0.5251840.3170357         |                             |                  |
| AC018752.1          | 0.8625139         | 1.9207770.08315092        | 2.150777863               | 0.075903369                 | 0.8922846        |

3.0554040.9021668 0.7621789 1.4987030.2732459 0.734758875 1.679118  
0.206080064 1.319251516 0 0.1129665 0 0 0.4179293 0 0.8723394  
0 0.1564828 0.7807664 0.5581030.2284230.2241466 0.3620646 0  
0.5443876 0.378689077 0 0.4731424 0.1211899 0.078231671 1.0761520  
0.5563125 0.2479347 0.1190293 0.1887743 0.1715328 0.2068835  
0.5596177 0.2905874 0 0.1141009 0.2206154 0 0 0.2436679  
0.1282787 0.190762501 0 1.1428630 0.2965030.1543608 0 0.138652  
0.5248912 0.4687965 0 0.2283150.131274356 0 0.9750133 0.8434744  
0.21607262 0.5525211 0.2540083 0.4416888 0.362093623 0.4000589 0  
0.4378991 0.1229671 0 0 0.1097699 0.17794 0.1142331 0.1831216  
0.977182195 0.4774380.4215599 0 0 0.2055672 0 0.625305068 0 0  
0.2044066 0.175611803 0.2855423 0 0 0 0.07389848 0.1790907  
0.2621451 0.6276935 0 0.3761678 0.31660443 6.4084820.096505633 0  
0.1290327 0.8516349 0.1475832 0.5756567 0.1392704 0.1130519 0  
0.5986654 0.5436233 0 0 0.1092318 0.5558815 0.2050725  
0.1302125 0.5520511 0 0.1174179 0 0 0.3348706 0.4030442  
0.6935291 0 0.0948215 0.3758028 0.1835545 0.09063098 0.1081264  
0 0 0 0.2755019 0 0.1085251 0.1449362 7.56 0 0.1070069 0  
0.07377398 0.1085448 0.2336098 0.256663053 0.4893166 0.3394455 0  
0.2049059 0 0 0.3099002 0.6131673 0.2192796 0 0.3716889 0  
0 0.4416284 0.2126953 0.2931815 0.1198822 0 0.9795214  
0.132445722 0.2876182 0.1240189 0.0797959 0.5847277 0.2860244 0  
0.1903652 0.1307710.2742654 0 0 0.6486656 0.1049318 0.1148984  
0.4308816 0 0 0.2497125 0 0.2325680.2753629 0 0.2733468  
0.1111512 0.5032559 0.181192567 0.2070294 0 0.6471092 0.4620765  
0.418986838 0.3731955 0 0.4518866 0.3759576 0.1901929 0.1442155  
0.4115545 0.1099112 0.1237182 0.1540533 0.3614330.3875376  
0.1094978 0.338716812 0.074532533 0.1579467 0.299475614 0.214406777 0  
0.246929006 0.4036392 0.7090829 0.07729825 0 0 0 0 0.136096398  
0 0 0.1946792 0.24776 0.4382034 0.2105774 0 0.6198470.1623934  
0.2364344 0.3548793 0.104881886 0.1752458 0 0.2154323 0.1360752  
0.4388044 0 0 0.4437771 0.3934913 0 0.5681334 0.184746803  
0.1735819 0.1266349 0.7015869 0.3440534 0 0 0.1166789  
0.2212277 0.6283392 0.2428564 0.3471985 0 0 0 0.435431402  
0.0698375 0.4100986 0 0 0.2440494 0.2289122 0.3059618  
0.07831887 0 0.1165359 0.203253119 0 0.1683401 0 0.338723  
0.8289952 0 0.1978432 0.2692327 0 1.7589670 0.2550046  
0.07252362 0.1487754 0.8006286 0.3835685 0 0.1546246 0  
0.093824658 0 0.1057541 1.4050680 0 0 1.6051562.9698740.6244846  
0.5122397 0.2873905 0.077723221 0.1096794 0.6693355 0.3537724 0  
0.1039295 0.550454204 0.64728 0.2227994 1.2795550 0.5250153 0 0  
0.8045460.3206928 0 0.3560898 0.156067854 0 0 0 0.132527346  
0.523451117 0 0.2081629 0.1051745 0 0.2252614 0 0.1134943  
0.09511705 0.1762119 0 0.1329555 0.1810045 0 0 4.2752210

|             |             |             |             |             |             |             |             |           |
|-------------|-------------|-------------|-------------|-------------|-------------|-------------|-------------|-----------|
| 0.7657151   | 0.4857525   | 0.2885309   | 0           | 0           | 0.1565678   | 0           | 0           | 0         |
| 1.9452720   | 0.1928214   | 0.1294812   | 0.1234999   | 0.2440395   | 0           | 0.4302742   |             |           |
| 0.4096542   | 0.2525541   | 0           | 0.1266724   | 0           | 0           | 0.08699801  | 0.1315774   | 0         |
| 0           | 0.2440654   | 0.3588973   | 0.25266     | 0.1550339   | 0.1796383   | 0           | 1.320247    |           |
| 0.2822214   | 0           | 0.08871264  | 0           | 0.3995532   | 0.2863684   | 0.07828368  |             |           |
| 0.1088407   | 0.1207121   | 0           | 0.09391352  | 0           | 0.5642403   | 0           | 0.1046861   | 0         |
| 0.07622538  | 0.717254656 | 0.662576439 | 0           | 0.626936871 | 0           | 0           | 0           | 0.5008994 |
| 0.1413505   | 0.2106812   | 0.4429442   | 0           | 0.04876854  | 0.3523447   | 0.4655045   |             |           |
| 0           | 0.1329124   | 0.8863228   | 0           | 0           | 0.8385337   | 0.4838058   | 0.2214809   |           |
| 0.4236664   | 0           | 0.1594413   |             |             |             |             |             |           |
| MIRLET7A1HG | 0.2476346   | 0.08484162  | 0.1074298   | 0.11026885  | 0.087169862 |             |             |           |
| 0.4803414   | 0.1686983   | 0.2266419   | 0.07294256  | 0.2599667   | 0.03922555  |             |             |           |
| 0.070318387 | 0.2724847   | 0.251460762 | 0.32195253  | 0.5162120   | 0.3243359   |             |             |           |
| 0.01983052  | 0.04583026  | 0.2499809   | 0           | 0.2325659   | 0.1407216   | 0.2246373   |             |           |
| 0.02802054  | 0.02670597  | 0.03279103  | 0.4933829   | 0.06930111  | 0.085887961 |             |             |           |
| 0.1172235   | 0.195704404 | 0.01210744  | 0.1494273   | 0.03479459  | 0.01123047  | 0           |             |           |
| 0.02067155  | 0.4259248   | 0.1779601   | 0           | 0.0270993   | 0.1477453   | 0.01484948  |             |           |
| 0.2209222   | 0.2641949   | 0.1424830   | 0.01637965  | 0.01055674  | 0.05052457  |             |             |           |
| 0.08662739  | 0.0349795   | 0.09207458  | 0.013692361 | 0.1465128   | 0.109375    |             |             |           |
| 0.01541915  | 0.1383336   | 0.04431823  | 0.08366749  | 0.01990406  | 0.04521014  |             |             |           |
| 0.01682441  | 0.1428151   | 0.06555106  | 0.01884496  | 0           | 0.1399671   | 0.6659627   |             |           |
| 0.062036181 | 0           | 0           | 0.1521749   | 0           | 0.1244318   | 0.03552876  | 0.09429326  |           |
| 0.4942677   | 0.01451795  | 0.2751738   | 0.01575791  | 0           | 0.01639862  | 0.03505045  |             |           |
| 0           | 0.03916465  | 0.0201722   | 0.1684849   | 0           | 0.05902     | 0.05133957  | 0.056103155 |           |
| 0.1288607   | 0.009277021 | 0.6895697   | 0.025209778 | 0.02049537  | 0           | 0.02152506  |             |           |
| 0           | 0.1166927   | 0.03856379  | 0.01881599  | 0.1051259   | 0.02348256  | 0.0540004   |             |           |
| 0.034087376 | 12.538760   | 0.027707541 | 0.02267617  | 0.2778473   | 0.01222556  | 0           |             |           |
| 0.1756054   | 0.03998566  | 0           | 0.0168255   | 0.04297041  | 0.0260131   | 0.01763253  |             |           |
| 0.07279271  | 0.07840333  | 0.1117186   | 0.07850393  | 0.2990805   | 0.03169966  | 0           |             |           |
| 0.03371162  | 0.128799008 | 0.05065445  | 0.2643961   | 0           | 0.0142227   | 0           |             |           |
| 0.1361201   | 0.07193067  | 0.02634999  | 0.2862297   | 0.03104395  | 0.0234516   |             |             |           |
| 0.1296417   | 0.03752042  | 0.02966205  | 0.01491933  | 0.01557922  | 0.02080618  |             |             |           |
| 4.6713720   | 0.03012544  | 0.1075289   | 0.0434446   | 0           | 0.01558204  | 0.1676781   | 0           |           |
| 0.04682891  | 0.01624292  | 0.01309604  | 0.0441226   | 0           | 0.01572257  | 0.05931656  |             |           |
| 0.1232317   | 0.2833062   | 0.028233781 | 0.03557162  | 0.01745751  | 0.05423882  |             |             |           |
| 0.07396378  | 0.1221330   | 0.1683495   | 0.09178437  | 0.02897974  | 0.01171785  |             |             |           |
| 0.038026228 | 0           | 0.1246239   | 0.08018515  | 0.01399     | 0.09238489  | 0.06608336  |             |           |
| 0.4372430   | 0.5068630   | 0.05249587  | 0.09295249  | 0.05334394  | 0.1263752   | 0.03012676  |             |           |
| 0.03298826  | 0.06185478  | 0.09951413  | 0.01667092  | 0.07169446  | 0           | 0.03338606  |             |           |
| 0           | 0           | 0.1308001   | 0.1595619   | 0.1083666   | 0.039016379 | 0.1485995   |             |           |
| 0.01608811  | 0.09289511  | 0.02211098  | 0           | 0.08036056  | 0           | 0           | 0.2590571   |           |
| 0.6689223   | 0.2277298   | 0.01477007  | 0.01577819  | 0.6571292   | 0.02211497  |             |             |           |
| 0.1902456   | 0.08901213  | 0.09431313  | 0.048624156 | 0           | 0.7935860   | 0.014330308 |             |           |
| 0.015389476 | 0           | 0.070895296 | 0.04345802  | 0.1832251   | 0.02219295  | 0.072280772 |             |           |

|                                                     |                                            |                              |                    |                    |             |             |
|-----------------------------------------------------|--------------------------------------------|------------------------------|--------------------|--------------------|-------------|-------------|
| 0.1462625                                           | 0.07003747                                 | 0.04765319                   | 0.019537183        | 0                  | 0.02547873  | 0.05589395  |
| 0.2311851                                           | 0.04193724                                 | 0.03022923                   | 0.1167508          | 0.2335765          | 0.1165611   |             |
| 0.03394111                                          | 0.2445329                                  | 0.03011243                   | 0.02515724         | 0.05769283         | 0.3092618   |             |
| 0.02930121                                          | 0.01049869                                 | 0.01882748                   | 0.09007926         | 0.3185299          | 0.07531633  |             |
| 0.02926227                                          | 0.1468041                                  | 0.026521144                  | 0.1245919          | 0.1090737          | 0.04196484  |             |
| 0.7778964                                           | 0                                          | 0.1170052                    | 0.05024915         | 0.03175812         | 0.02004458  | 0.6798287   |
| 0                                                   | 0.01520904                                 | 0                            | 0                  | 0.01002545         | 0.02943565  | 0.1325468   |
| 0.3328256                                           | 0.01643063                                 | 0.01464068                   | 0.02248598         | 0.08294879         | 0           | 0.043766699 |
| 0.072612153                                         | 0.01208295                                 | 0                            | 0.1296668          | 0.6694064          | 0.04959888  | 0.02840119  |
| 0.02318966                                          | 0.06005796                                 | 0.5198668                    | 0.02971838         | 0.07321388         | 0.0728774   |             |
| 0.0427146                                           | 0.5746672                                  | 0.01573223                   | 0                  | 0.01109849         | 0           | 0.013468906 |
| 0.01428341                                          | 0.01518143                                 | 0.02017031                   | 0                  | 0.09094493         | 0.05981713  | 1.5920380   |
| 0.2049080.1654517                                   | 0.2269083                                  | 0                            | 0.03148985         | 0.1441287          | 0.01692848  |             |
| 0.1061149                                           | 0.02983901                                 | 0.128407348                  | 0.08362767         | 0.01066125         | 0.2755278   |             |
| 0.03715374                                          | 0.06460118                                 | 0                            | 0                  | 0.0384986          | 0.2608749   | 0.1234721   |
| 0.06134174                                          | 0.15682916                                 | 0.02257878                   | 0.0651159          | 0.0562777          | 0.095124158 |             |
| 0.015028701                                         | 0.03031073                                 | 0.07968699                   | 0.04529465         | 0.01574161         | 0.01616859  |             |
| 0.05537902                                          | 0.3095588                                  | 0.02730887                   | 0.07588779         | 0.08659354         | 0.02862943  |             |
| 0.05196784                                          | 0.061975998                                | 0.04738065                   | 5.6909050.05422282 | 0.03297644         |             |             |
| 0.06973172                                          | 0.09664613                                 | 0.02897995                   | 0.01133962         | 0.1573316          | 0.4305797   |             |
| 0.1262415                                           | 0                                          | 0.1034265                    | 0.05536056         | 0.1115253          | 0.03545781  | 0.2452299   |
| 0                                                   | 1.1118170.05040642                         | 0.1450206                    | 0.0504421          | 0.1272904          | 0.0151917   |             |
| 0.04924555                                          | 0                                          | 0.05666541                   | 0.01778769         | 0.1257144          | 0.5021908   | 0.180324    |
| 0.7435424                                           | 0.1112787                                  | 0.07736339                   | 0.01104351         | 0.2948194          | 0.2430841   |             |
| 0.3432880.08914538                                  | 0                                          | 0.3584841                    | 0.05481245         | 0.02247587         | 0.09374715  |             |
| 0.1906158                                           | 0.7367931                                  | 0.04044499                   | 0                  | 0                  | 0.2144722   | 0.04508431  |
| 0.02188492                                          | 0.038611792                                | 0.149467219                  | 0.03142982         | 0.03599972         | 0.0379141   | 0           |
| 0.2564119                                           | 0.7010846                                  | 0.01014572                   | 0.01512207         | 0.3052148          | 0.04016997  |             |
| 0.08401104                                          | 0.1011610.1737451                          | 0.012277921                  | 0                  | 0.3021836          | 0.1177287   |             |
| 0.02252687                                          | 0.3392383                                  | 0.02315076                   | 0.06358893         | 0.1824570.01672752 |             |             |
| 0.1487748                                           |                                            |                              |                    |                    |             |             |
| MIR100HG                                            | 2.13037                                    | 12.945422.28644614.429539717 | 2.26291652         | 5.672251           |             |             |
| 11.7384410.0894212.4056914.425532.8314378.283665569 | 6.80424                                    | 8.538814686                  |                    |                    |             |             |
| 10.233699266                                        | 7.4906743.0245573.2067372.2085390.05846821 | 1.404461516                  |                    |                    |             |             |
| 0.11182                                             | 0.1222251                                  | 0.1154987                    | 0.5254293          | 1.6100320.6479419  | 0.2097746   |             |
| 0.4611148                                           | 0.989988383                                | 4.3647390.787004975          | 0.1049726          | 0.3697651          |             |             |
| 1.6767350.418913727                                 | 1.7103620.9878166                          | 1.2076764.4063190.4754482    |                    |                    |             |             |
| 0.4125342                                           | 0.7844668                                  | 3.6228590.1498316            | 0.2607406          | 13.327570.04293414 |             |             |
| 0.1702844                                           | 0.4991759                                  | 0.1979556                    | 0.3579354          | 0.7240346          | 0.209819988 |             |
| 0.07877694                                          | 0.1212930.07461508                         | 0.5578439                    | 0.5406208          | 4.7539280.3732325  |             |             |
| 1.5679030.2374612                                   | 1.2526170.2610368                          | 0.577555519                  | 2.3808920.04468411 |                    |             |             |
| 0.07019077                                          | 5.897686517                                | 0.07036745                   | 0.5073028          | 0.2275656          | 2.525853592 |             |
| 4.22849                                             | 1.2428950.7541561                          | 0.03915181                   | 1.4402080.1149296  | 1.66171            |             |             |
| 0.5150436                                           | 1.1572580.7491253                          | 0.763676742                  | 0.8094183          | 0.5084149          |             |             |



|                            |                           |                            |                            |                           |             |
|----------------------------|---------------------------|----------------------------|----------------------------|---------------------------|-------------|
| 0.6768186                  | 0.2569752                 | 4.23647                    | 0.2743172                  | 1.251115336               | 0.01889613  |
| 0.4582786                  | 0.1153718                 | 0.233820071                | 0.4421753                  | 4.0905691.2542880.4807139 |             |
| 0.8855358                  | 0.9149304                 | 0.07967119                 | 0.2028810.02604133         | 1.0915321.33795066        |             |
| 0.3915945                  | 1.494433865               | 1.0058830.1605973          | 3.2711060.6792103          | 0.03749008                |             |
| 0.1934953                  | 0.8540607                 | 0.05767289                 | 0.2368193                  | 3.6059510.4764028         |             |
| 0.9344476                  | 0.05691044                | 0.5502734                  | 0.3145962                  | 0.4654681                 | 2.368087    |
| 0.07301589                 | 5.5363772.272351468       | 0.0408538                  | 2.4353051.7102391.597321   |                           |             |
| 2.454405093                | 0.4446232                 | 2.4220631.1475960.8525705  | 0.3912118                  | 0.7423815                 |             |
| 0.01742643                 | 0.4841752                 | 0.1355638                  | 0.4361865                  | 0.5999761                 | 0.241221    |
| 3.3917490.07289029         | 0.1765456                 | 2.1461340.07260263         | 0.7603169                  | 1.132599                  |             |
| 0.234015252                | 0.3163106                 | 0.9694174                  | 5.011769963                | 1.2336391.08574           | 0.3106737   |
| 4.4281870.5359894          | 0.4823719                 | 0.816913138                | 0.02868921                 | 0.09503881                |             |
| 0.1202978                  | 0.0937408                 | 0.4432621                  | 2.4722770.9496134          | 1.1481854.014175          |             |
| 0.590376292                | 0.5994032                 | 0.0682043                  | 0.2540642                  | 0.09590728                | 0.1345323   |
| 0.9460311                  | 0.1294868                 | 0.1097691.8761450.9495947  | 2.6701116.242848           |                           |             |
| 0.5497382                  | 0.02327997                | 6.0662710.1886112          | 0.1344542                  | 0.3794633                 |             |
| 0.589686867                | 1.7031020.2550502         | 1.3529610.2083483          | 2.0526030.2621994          |                           |             |
| 0.550680796                | 9.9414250.2303130.3204985 | 0.6107787.894990706        | 0.9775865                  |                           |             |
| 3.1763241.1117790.05876285 | 0.06606109                | 0.02295856                 | 0.1667730.3292703          |                           |             |
| 0.08952494                 | 3.4557550.05928239        | 0.2221004                  | 0.1616389                  | 0.990212447               |             |
| 0.146698289                | 0.4343147                 | 1.285791276                | 2.116231339                | 1.2450170.125077851       |             |
| 0.1226741                  | 8.3656840.06488405        | 0.553810666                | 0.1516674                  | 0.1647526                 |             |
| 0.04323739                 | 1.331476745               | 1.3879250.07705912         | 2.6005271.8699320.08033011 |                           |             |
| 0.9081724                  | 0.2000938                 | 0.07400801                 | 11.069540.01596827         | 1.5140790.783232045       |             |
| 0.5275349                  | 0.616527781               | 4.57904                    | 2.4124330.1587637          | 0.4783190.02906028        |             |
| 0.2080895                  | 1.2034922.9913750.1677339 | 5.711082561                | 1.4319230.5754709          |                           |             |
| 0.3858383                  | 0.2589223                 | 1.7007190.02883437         | 1.3272570.2209169          | 3.831424                  |             |
| 0.08786781                 | 0.08039668                | 1.3554361.8390150.9827222  | 0.040331092                | 0.8853868                 |             |
| 1.0208380.5799412          | 0.6761957                 | 1.3068320.02319034         | 0.3985199                  | 0.174553                  |             |
| 0.4716438                  | 0.2698485                 | 0.182376622                | 0.047582539                | 0.9745135                 | 0.1078924   |
| 8.5983390.9478058          | 0.5967035                 | 4.5210941.8671750.6115288  | 2.458794                   |                           |             |
| 2.1931141.5721640.0965623  | 0.9344607                 | 3.6672890.09357658         | 0.9261389                  |                           |             |
| 0.5370689                  | 0.4137287                 | 2.123704063                | 0.3887950.05815958         | 3.7802180.1054059         |             |
| 0.2237141                  | 1.4955540.2491993         | 0.6198339                  | 0.4312315                  | 0.04448                   | 0.05406996  |
| 0.267712104                | 6.03183                   | 0.0581213                  | 1.7271240.8852566          | 0.5354628                 | 1.065504389 |
| 1.5850130.4084291          | 0.2268481                 | 1.7417281.3242620.02618636 | 1.745967553                |                           |             |
| 3.1438                     | 1.2159920.1881006         | 1.4058670.53078859         | 0.04097301                 | 0.3238564                 |             |
| 3.7710750.395105413        | 0.206056014               | 0.6829656                  | 0.0803364                  | 0.5662308                 |             |
| 0.7554070.1662636          | 0.7090452                 | 0.1905340.6442352          | 1.3720120.2165021          |                           |             |
| 0.03848367                 | 0.04191308                | 0.194940944                | 1.4616634.75857            | 1.51239                   | 0.9242161   |
| 1.15292                    | 3.4547220.03213774        | 2.7002470.1450183          | 0.1585368                  | 0.2545407                 |             |
| 0.1356347                  | 0.05839087                | 0.4967243                  | 0.3035722                  | 5.7176971.1655050.6264609 |             |
| 0.2023806                  | 0.06775628                | 2.3136540.4983612          | 4.7407920.0275679          | 0.3938652                 |             |
| 0.7277420.0571272          | 0.1362882                 | 0.8668944                  | 0.1813201                  | 0.1869877                 |             |

|             |             |             |             |             |             |             |
|-------------|-------------|-------------|-------------|-------------|-------------|-------------|
| 0.2157391   | 0.8997279   | 0.1793859   | 0.3874462   | 12.360190   | 4.697080    | 0.02708497  |
| 0.1412272   | 0.6238943   | 0.0838461   | 0.8592796   | 0.6956325   | 0.5670668   |             |
| 0.1677113   | 0.2304188   | 1.2748860   | 7.33566976  | 1.34125     | 0.5621721   | 0.2787706   |
| 0.4905078   | 1.9724560   | 9.86136969  | 7.189058768 | 1.0519740   | 2.64939628  | 0.14907     |
| 0.03009918  | 0.3619021   | 0.3352761   | 1.0453421   | 1.0275331   | 1.88724     | 1.67254     |
| 0.06069858  | 6.9197090   | 0.01347393  | 0.425802516 | 1.1733720   | 1.859945    | 0.2984158   |
| 2.102988    | 0.9907052   | 0.6861790   | 0.0427381   | 0.1318265   | 3.622354    | 1.096061    |
| AC073487.1  | 0.3918541   | 0           | 0.3238013   | 0.119648998 | 0.206904836 | 0.3474681   |
| 0.1830488   | 0.2195727   | 0.1978687   | 0.07295199  | 0.3192173   | 0.286125384 |             |
| 0.5117261   | 0.28087661  | 0.051373499 | 0.4968843   | 0.2199537   | 0.05379355  |             |
| 0.06216108  | 0.8408621   | 0.178256458 | 0.1941149   | 0.5285502   | 0.517961    |             |
| 0.6840931   | 0.3984441   | 0.2965036   | 0.5528102   | 0.4229791   | 0.232985301 |             |
| 0.3533203   | 0.235946919 | 0.1313737   | 0.4421958   | 0.3775443   | 0.365574086 |             |
| 0.26668     | 0.33645     | 1.2276030   | 0.1930985   | 0           | 0.1470227   | 0.2671891   |
| 0.8056333   | 0.2724037   | 0.9807096   | 0.4567831   | 0.0888650   | 0.3722798   | 0.2055844   |
| 0.1958259   | 0.3083850   | 1.498605    | 0.297142345 | 0.17664     | 0.2596105   | 0.9620208   |
| 0.1154624   | 0.3907167   | 0.4539238   | 1.0258680   | 0.3679199   | 0.4107508   |             |
| 0.2905573   | 0.04445453  | 0.869041198 | 0.04689864  | 0.5062451   | 0.6569215   |             |
| 0.210354252 | 0.4303189   | 0.1978288   | 0.5847992   | 0.376011525 | 0.311577    |             |
| 0.1445665   | 0.4689411   | 0.2394255   | 0.7876467   | 0.6931364   | 0.9831563   |             |
| 0.2771694   | 0           | 0.1901603   | 0           | 0.2390413   | 0.1368011   | 0.7031432   |
| 0.0432158   | 0.4269373   | 0.2089006   | 0.304378176 | 0.1588891   | 0.1006618   |             |
| 0.4377934   | 0.615471234 | 0.8339562   | 0           | 0.2919514   | 0.7047779   | 0.2014397   |
| 0.6974043   | 0.6124979   | 0.5296041   | 0.2229512   | 0.1464850   | 2.1575784   | 7.85637     |
| 0.338225791 | 0.06151287  | 0.6532126   | 0.06632771  | 0.1149419   | 0.1681266   |             |
| 0.3254032   | 0.2641440   | 0.1942739   | 0.4586715   | 0.5261426   | 0.1974623   |             |
| 0.2126820   | 0.3896424   | 0.4791485   | 1.1916050   | 0.04299528  | 0.1178799   | 0.3200692   |
| 0.058231435 | 0.2748171   | 0.3586091   | 0.1569510   | 0.1543257   | 0.072097808 |             |
| 0.5169475   | 0.2926858   | 0.4288722   | 0.3176368   | 0.2947415   | 0.4453145   |             |
| 0.8791867   | 0.2035607   | 0.1341054   | 0.3237692   | 0.0422612   | 0.1975407   |             |
| 6.3999340   | 0.2860209   | 0.4583698   | 0.2946266   | 0.05745724  | 0.1690755   |             |
| 0.7277675   | 0.29984455  | 0.06351558  | 0.3965545   | 0.248676219 | 0.518656    |             |
| 0.6456225   | 0.1279502   | 0.2815855   | 0.2865311   | 0.4269527   | 0.306355206 | 0           |
| 0.4262075   | 0.3923514   | 0.6592423   | 0.2898928   | 0.4186197   | 0.6535732   |             |
| 0.1179185   | 0.1589331   | 0.257881084 | 0.6160140   | 0.1448841   | 0.3728837   |             |
| 0.07590038  | 0.5012186   | 0.5019338   | 1.1860940   | 0.3564685   | 0.2136056   |             |
| 0.3782235   | 0.2894085   | 0.2525995   | 0.1225857   | 0.4474306   | 0.1006748   |             |
| 0.2699485   | 0.2261131   | 0.6806908   | 0.1944476   | 0.5886740   | 0.5361508   |             |
| 0.2388755   | 0.4967436   | 0.2164191   | 0.2939623   | 0.03527946  | 0.1612403   |             |
| 0.2182083   | 0.08399779  | 0.2399187   | 0.407898339 | 0.2422126   | 0.7894078   |             |
| 0.3519419   | 0.3220869   | 0.2962551   | 0.5896749   | 0.1201988   | 0.1926043   |             |
| 1.6862170   | 0.6598956   | 0.2345784   | 0.7847454   | 0.29848     | 0.131901065 | 0.261216098 |
| 1.9682130   | 0.038873331 | 0.45921149  | 0.1989319   | 0.144236414 | 0.1571828   |             |
| 0.4970283   | 0.6923235   | 0.392147101 | 0.7935223   | 0.2533176   | 0.4201183   |             |

|             |             |             |             |             |             |
|-------------|-------------|-------------|-------------|-------------|-------------|
| 0.264989206 | 0.3334413   | 0.4838069   | 0.0379054   | 0.5065263   | 0.5119276   |
| 0.3690080   | 0.6334116   | 0.9956805   | 0.06323825  | 0.09207088  | 0.4422239   |
| 0.449267208 | 0.3412158   | 0.195626681 | 0.4753901   | 0.4769063   | 0.08543829  |
| 0.1532180   | 0.3420969   | 1.2788160   | 0.3575390   | 0.1984469   | 0.3097347   |
| 0.5069641   | 0.6903877   | 0.1138366   | 0.9378545   | 0.03335414  | 0.1763311   |
| 0.3180546   | 0.5168950   | 0.2446841   | 0.7565734   | 0           | 0.1237711   |
| 0.983465859 | 0.3263484   | 0.7186417   | 0.6831548   | 0.1048683   | 1.282989    |
| 0.1782832   | 0.1191458   | 0.3354831   | 0.4050222   | 0.09076143  | 0.356173235 |
| 0.295458712 | 0.2622160   | 0.2177325   | 0.1319035   | 0.4842335   | 0.08969677  |
| 0.1155644   | 0.3145290   | 0.08145858  | 0.4432135   | 0.2418481   | 0.6951166   |
| 0.3106589   | 0.3765789   | 1.3250481   | 0.0242310   | 0.1748769   | 0.3311713   |
| 0.365366343 | 1.0848910   | 0.2059107   | 0.4377224   | 0.0457451   | 0           |
| 0.6250701   | 0           | 0.5905874   | 0.7978933   | 0.8393541   | 0.181599057 |
| 0.5212972   | 0.3214492   | 0.07196353  | 0.1214149   | 0.455503456 | 0.2268539   |
| 0.1446020   | 0.5294188   | 0.05039284  | 0.1168276   | 0.2348687   | 0.480135369 |
| 0.2436789   | 0.8741759   | 0.4465846   | 0.1386663   | 0.273487524 | 0.367492    |
| 0.05887922  | 0.1017750   | 0.464472021 | 0.122303512 | 0.1233343   | 0.2702052   |
| 0.04095641  | 0.1708069   | 0.3508797   | 0.07511238  | 2.0330290   | 0.07407982  |
| 0.2401679   | 0.1879194   | 0.1035494   | 0.2114570   | 0.067248059 | 0.1713705   |
| 0.2941767   | 0.2683621   | 0.1891588   | 0.2247159   | 0.7861292   | 0.06152121  |
| 0.3048485   | 0.3554840   | 0.2397157   | 0.1459830   | 0.5050108   | 0.3003493   |
| 0.1202315   | 0.2534197   | 0.1053526   | 2.1782120   | 0.04557859  | 0.2458702   |
| 0.5131220   | 0.3452961   | 0.4945199   | 0.2226445   | 0.2371477   | 0.5636191   |
| 0.04825206  | 0.3410212   | 1.0454670   | 0.7686779   | 1.1314780   | 0.3924203   |
| 0.05991471  | 0.3998731   | 0.6044552   | 0.6478091   | 0.2418216   | 0.05312455  |
| 0.6612643   | 0.1486878   | 0.1524238   | 0.9324503   | 0.3290489   | 2.284198    |
| 0.1828562   | 0.119626423 | 0.1098615   | 0.07757217  | 0.5707271   | 0           |
| 0.558617993 | 0.589752078 | 0.1278879   | 0.488275975 | 0.4113930   | 0.5849204   |
| 3.4777981   | 1.1459610   | 0.3027412   | 0.08204221  | 0.3794750   | 0.1089677   |
| 0.3773219   | 0.5800767   | 0.066611784 | 0           | 0.8197230   | 0.1368679   |
| 0.8311845   | 0.3768015   | 0.2299940   | 0.8249081   | 0.3176332   | 0.9002855   |
| AP001160.1  | 0.5225819   | 0           | 0.6493380   | 0.041368837 | 0.408786773 |
| 0.06328941  | 0.6680751   | 0.06841344  | 0.3363103   | 0.4414797   | 0.065952213 |
| 0.1572712   | 1.193109288 | 0.177624714 | 1.8116940   | 0.7604936   | 1.4879370   |
| 0.9565937   | 1.109384307 | 0.1677889   | 1.27923     | 1.0113081   | 0.0249470   |
| 1.0251661   | 1.52908     | 0.9099734   | 0.671292071 | 0.6596697   | 0.632237503 |
| 0.4586698   | 0.6200487   | 0.800519639 | 0.6322632   | 1.5898180   | 0.7490221   |
| 0.8011693   | 1.8910880   | 0.6354166   | 0.8314297   | 2.0055530   | 0.1130208   |
| 1.62793     | 0.5223287   | 0.7722981   | 1.0899111   | 0.32706     | 0.3608833   |
| 0.590740345 | 0.8550302   | 1.1797133   | 0.0080440   | 0.4191738   | 1.4340420   |
| 2.2028460   | 0.1696119   | 0.6311901   | 0.6027639   | 0.7685112   | 0.67164422  |
| 0.3567362   | 1.3346420   | 0.2839146   | 0.378197696 | 0.7141607   | 0.8207955   |
| 0.9752950   | 0.260013199 | 1.0772830   | 0.5664864   | 0.4421922   | 1.3576211   |
| 0.8848727   | 0.7389737   | 0.81457     | 0.3383689   | 0.3123041   | 0.187954745 |
|             |             |             |             |             | 0.25713     |

0.3027149 1.4586781.6137290.4981982 1.9260730.968201116 0.5273873  
0.4002458 1.5962421.938846128 0.6920201 0.5190883 0.8479186 3.61217  
1.47256 3.0382211.4824050.9014719 1.1232490.5824455 0.660730684  
1.0226270.597704169 1.2760910.7644131 0.2981279 1.0730170.6588071  
0.9375723 0.1826564 3.0930321.3971470.6831414 1.7860711.046851  
0.1176562 0.5089404 0.5338139 1.4726780.3567766 0.3804004  
0.3161842 0.845611786 1.0642070.4734152 0.3473029 0.1867542  
0.697982175 0.9447445 0.5734473 0.8402718 1.0982340.4658622  
1.4077093.18166 0.7390051 0.4636716 0.5317327 0.2922376 0.3512572  
1.15065 1.66704 1.1814121.2631590.5165143 0.9353298 0.9436005  
0.691144953 0.4831335 1.1578121.228288698 0.9380137 0.5022563  
1.3566620.5007015 0.8255716 0.8857175 0.688498284 0.2001776  
0.8514245 0.6782806 0.4360479 0.8018474 0.8157984 0.548794  
1.1143940.1758444 0.713302448 2.6720291.6364010.9669385 0.577339  
0.8664857 1.2643951.5891140.7394973 0.4923632 0.6102665 0.9506029  
0.26201 1.5823440.7425593 0.2552621 1.3066921.56358 1.7819350.403383452  
1.7222191.1616840.2973297 1.6929630.4788944 0.5646553 0.878251031  
0.6968636 2.4142680.2323390.2073807 0.451300855 1.2394322.32908  
0.5780013 0.5264389 0.6145841.4951280.1662357 0.3699625 0.7662445  
1.8667640.9083858 0.5217827 0.9435422 0.410445078 0.923229126  
2.5944560.618263817 0.057735681 1.2380580.531946408 0.6521544 1.03109  
2.43535 1.254165883 3.0571721.6422181.0950110.916204509 0.7378424  
1.0036620.8125629 1.0341140.3933329 1.3609080.7665108 0.7093804  
1.0057780.7427853 0.5160362 2.089960087 1.3685210.51405066 0.9088523  
1.4290560.5711149 3.2844721.4193672.1988142.0132351.3997120.8261327  
0.696483372 1.2620430.9548107 0.6769778 1.2044121.5683860.9754685  
2.0108423.5445590.3007997 1.7657090.3116466 0.4279406 0.9638789  
0.8614541.313238342 1.2976080.4417272 1.3177580.2900671 1.018627  
0.3698503 0.8238973 0.6748732 4.1077540.9414274 0.875715398  
0.544828439 0.8612852 1.7565650.6688857 0.9208349 2.0468450.186464  
0.4204958 0.6196176 0.3622078 0.5574625 1.5450280.6835233  
1.1417781.0779710.5902156 0.6348719 0.8952055 0.4391509 0.555834445  
2.4649620.6549845 0.4729476 1.8030751.4671265.7225060.1178831  
0.0420911 0.2882775 1.4138490.9673602 0.544164146 0.6497611  
0.9462566 0.5398305 1.3684830.9515327 0.537322454 0.1220102  
0.2799797 2.5626640.8014766 0.2827533 2.4361870.791728498 0.3851538  
2.3604111.3896660.9972376 0.504313378 1.6941460.6921579 0.8093444  
0.249809716 0.507439671 0.3980017 0.6726520.8496447 1.4764190.6369155  
0.4674641 1.2530371.0501420.4033295 0.9421151 0.6444429 0.5117813  
0.325515766 0.5332646 2.6687740.8476007 0.8041510.3924119 0.3884795  
1.4677490.9146555 1.1805010.6321042 1.18403 1.2113721.04765 0.7269239  
1.7084750.3325618 0.7666774 0.3278325 1.5352070.8037024 0.2040241  
1.8687481.2961991.5103330.8005889 0.4685383 1.5589780.8341615  
0.6131249 0.7667589 0.7731539 0.7824204 1.5446640.2418659

|             |             |             |             |             |             |             |
|-------------|-------------|-------------|-------------|-------------|-------------|-------------|
| 0.5800371   | 0.6715330   | 0.9879593   | 1.2598930   | 0.5494385   | 0.5143012   | 1.049023    |
| 0.5654996   | 0.5691684   | 0.5568662   | 9.13404     | 2.1436480   | 0.5057826   | 2.398939813 |
| 0.3988404   | 1.2873940   | 0.9584591   | 2.4061170   | 0.2463126   | 0.26557174  | 0.280373149 |
| 1.0612190   | 0.3376444   | 0.3208178   | 0.789       | 1.8045780   | 0.4809817   | 0.5732515   |
| 0.2552961   | 1.2643311   | 0.1302730   | 0.8930062   | 0.8776377   | 0.5264765   | 0.391529264 |
| 1.6463761   | 0.2530170   | 0.8518017   | 1.3099450   | 0.8416228   | 0.6513987   | 0.795208    |
| 1.6827590   | 0.9413332   | 1.309502    |             |             |             |             |
| SSBP3-AS1   | 0.2990640   | 0.1391933   | 0.1501406   | 0.1688491   | 0.177       | 0.041712141 |
| 0.3505761   | 0.3187152   | 0.2293701   | 0.1519740   | 0.2359662   | 0.153821472 |             |
| 0.3438810   | 0.202231771 | 0.103569288 | 0.1457050   | 0.2394511   | 0.04337925  | 0.08772197  |
| 0.4429349   | 0.143746442 | 0.2054519   | 0.1065560   | 0.2272698   | 0.1302517   |             |
| 0.04381449  | 0.2331237   | 0.7566657   | 0.08527285  | 0.039141649 | 0.1851969   |             |
| 0.511345709 | 0.0926976   | 0.2005806   | 0.04757073  | 0.036849979 | 0.3532987   |             |
| 0.06782852  | 0.6259929   | 0.2141082   | 0.03737811  | 0.03704983  | 0.1885292   |             |
| 0.1542953   | 0.2086837   | 0.1748988   | 0.06375306  | 0.1074914   | 0.1674233   |             |
| 0.1243378   | 0.08685298  | 0.07173531  | 0.04028263  | 0.164736214 | 0.02670806  |             |
| 0.5458069   | 0.2192410   | 0.1163865   | 0.1999514   | 0.4301032   | 0.2503557   |             |
| 0.04120716  | 0.009200847 | 0.1952551   | 0.01792412  | 0.123670049 | 0           | 0.3954799   |
| 0.6704561   | 0.050889054 | 0.1995309   | 0.0598236   | 0.1178959   | 0.066328634 |             |
| 0.5129820   | 0.01942979  | 0.1461054   | 0.2509953   | 0.3255196   | 0.04299591  |             |
| 0.1464993   | 0.08381627  | 0.08071195  | 0.0527126   | 0.032877755 | 0.08031813  |             |
| 0.05515837  | 0.2055434   | 0.06098632  | 0.4088364   | 0.1123053   | 0.067499108 |             |
| 0.17938     | 0           | 0.3690848   | 0.179225765 | 0.3026269   | 0           | 0.1412582   |
| 0.01740444  | 1.1107170   | 0.1234799   | 0.1478333   | 0.1990514   | 0.05168007  |             |
| 0.06835229  | 2.5155250   | 0.037881403 | 0.04960413  | 0.2836358   | 0.06685853  |             |
| 0.1042756   | 0.02259628  | 0.1093358   | 0.05325159  | 0.009201443 | 0.1253304   |             |
| 0.1493721   | 0.2314269   | 0.1326950   | 0.03430146  | 0.06982413  | 0.1878268   |             |
| 0.2760069   | 0.05200725  | 0.06337245  | 0.1013982   | 0.270008336 | 0.1385083   |             |
| 0.08544051  | 0.03164143  | 0.02333411  | 0.087209772 | 0.1488813   | 0.08850844  |             |
| 0.0864609   | 0.05692068  | 0.2122145   | 0.2052015   | 0.1358875   | 0.02051898  |             |
| 0.07570004  | 0.05711305  | 0.04259942  | 0.03413514  | 1.9353460   | 0.1153240   | 0.09240764  |
| 0.1306732   | 0.1042507   | 0.02556429  | 0.1650582   | 0.010074807 | 0.06402389  |             |
| 0.2043055   | 0.028647587 | 0.0884750   | 0.03253947  | 0.02579483  | 0.3000584   |             |
| 0.3080792   | 0.1032887   | 0.077201745 | 0.1361726   | 0.05728246  | 0.06921099  |             |
| 0.09245472  | 0.1085362   | 0.0767218   | 0.2572472   | 0.02377245  | 0.1153476   |             |
| 0.093580171 | 0.1580585   | 0.1265711   | 0.2568430   | 0.1147617   | 0.2077056   |             |
| 0.09396228  | 0.4931793   | 0.1642612   | 0.1148347   | 0.01694446  | 0.07293116  |             |
| 0.1891471   | 0.04942671  | 0.02706068  | 0.09471513  | 0.03265307  | 0           | 0.06861384  |
| 0.070561358 | 0.1551930   | 0.3026473   | 0.03852595  | 0.1859814   | 0.08726044  |             |
| 0.1251107   | 0.021337082 | 0.1381511   | 0.4047166   | 0.03386801  | 0.08464358  |             |
| 0.082232554 | 0.1562566   | 0.1697548   | 0.1152965   | 0.3836945   | 0.1418474   |             |
| 0.4245672   | 0.05654169  | 0.07334394  | 0.1942527   | 0.1209412   | 0.4729115   |             |
| 0.05476332  | 0.07736624  | 0.132956675 | 0.03510755  | 0.6075893   | 0.054858211 |             |
| 0.050496718 | 0.0561467   | 0.048463582 | 0.2455831   | 0.2672032   | 0.394445    |             |

|                    |                                   |                     |                    |                     |                       |
|--------------------|-----------------------------------|---------------------|--------------------|---------------------|-----------------------|
| 0.474342568        | 1.0169810.1723578                 | 0.1498470.117528368 | 0.02688879         | 0.05573473          |                       |
| 0.1069845          | 0.1118413                         | 0.1720082           | 0.6860618          | 0.1276962           | 0.4075423             |
| 0.08924209         | 0.1361180.2061654                 | 0.074104808         | 0.01375786         | 0.126203066         |                       |
| 0.2875168          | 0.2136547                         | 0.09186352          | 0.0926665          | 0.1182290.35536     | 0.1853488             |
| 0.1440252          | 0.08920387                        | 0.166793131         | 0.3066128          | 0.08947452          | 0.05048894            |
| 0.1350515          | 0.08069059                        | 0.03554847          | 0.08244001         | 0.4428770.1096188   |                       |
| 0.4671098          | 0.2180576                         | 0.1330791           | 0                  | 0.04050774          | 0.218777729 0.1315841 |
| 0.08048811         | 0.1449731                         | 0.06342454          | 0.3544483          | 0.0359420.1040861   |                       |
| 0.01844553         | 0.3719735                         | 0.2195707           | 0.111696264        | 0.059564656         | 0.2510988             |
| 0.1170534          | 0.06204758                        | 0.2440544           | 0.2260366          | 0.06989354          | 0.08454564            |
| 0.0821105          | 0.3167938                         | 0.2112791           | 0.2102039          | 0.1537258           | 0.1985562             |
| 0.2985576          | 0.1591659                         | 0.008813824         | 0.1578066          | 0.1054364           | 0.169413578           |
| 0.2812047          | 0.1162328                         | 0.06618383          | 0.05533344         | 0.009947102         | 0.08178124            |
| 0.3436759          | 0.0490849                         | 0.07704062          | 0.1306953          | 0.6035310.097627948 |                       |
| 0.1722101          | 0.03941019                        | 0.1388665           | 0.04352368         | 0.06527282          | 0.237677063           |
| 0.3557080.03498222 | 0.3076368                         | 0.1727068           | 0.07654567         | 0.2959355           |                       |
| 0.044674885        | 0.06316177                        | 0.4951347           | 0.1650582          | 0.09504774          | 0.049009113           |
| 0.07408662         | 0.07122052                        | 0.03077687          | 0.052021024        | 0.147938776         | 0.02486427            |
| 0.2560256          | 0.02477051                        | 0.07747823          | 0.08842196         | 0.0454281           | 0.14256               |
| 0.01493454         | 0.2005888                         | 0.1894234           | 0.06262689         | 0.1420996           | 0.081343498           |
| 0.03454839         | 2.2731370.05930621                | 0.1623059           | 0.04576144         | 0.1585601           |                       |
| 0.1505599          | 0.01860407                        | 0.04916612          | 0.1740455          | 0.0828460.1103635   |                       |
| 0.3676490.0302753  | 0.2439616                         | 0.03393424          | 0.5555990.0424783  | 0.1942301           |                       |
| 0.05972636         | 0.1288757                         | 0.1172385           | 0.02983368         | 0.09138755          | 0.01795411            |
| 0.1024481          | 0.2272519                         | 0.03891058          | 0.1237501          | 0.2107669           | 0.147922              |
| 0.07934141         | 0.3529620.3243621                 | 0.1147490.1842621   | 0.1550927          | 0.5305573           |                       |
| 0.1671476          | 0                                 | 0.2823063           | 0.08243278         | 0.05531171          | 0.2990632 0.5780748   |
| 0.3042561          | 0.08110062                        | 0.325576258         | 0.1384259          | 0.03909649          | 0.2794288             |
| 0.01209446         | 0.07180988                        | 0.07038608          | 0.074308987        | 0.06875274          | 0.078749387           |
| 0.03110141         | 0.2267698                         | 0.1402252           | 0.2506883          | 0.1220656           | 0.03307952            |
| 0.1669143          | 0.01098398                        | 0.04977216          | 0.1383060.07308988 | 0.040286929         | 0                     |
| 0.3566065          | 0.1839511                         | 0.03695815          | 0.4129337          | 0.02532114          | 0.09273386            |
| 0.1413567          | 0.07318292                        | 0.3004107           |                    |                     |                       |
| AL139220.2         | 0.07959482                        | 1.9063510.04925229  | 1.586512209        | 0.046914146         | 0.0201068             |
| 0.7081784          | 1.8557923.4775272.5634460.3342557 |                     | 0.167147923        | 0.1936521           |                       |
| 0.339662404        | 3.139287542                       | 0.05675919          | 0.02327401         | 0.1636470.03699823  |                       |
| 0.03408291         | 0.165041546                       | 0.04814046          | 0.1184578          | 0.09268852          | 0.02764747            |
| 0.4838893          | 0.03725663                        | 0.08466329          | 0.1056757          | 0.256801317         | 0.3318004             |
| 0.09167315         | 0.2563012                         | 0.08773156          | 0.3870077          | 0.165206825         | 0.2469099             |
| 0.3003822          | 0.2196782                         | 1.1365510.1256809   | 0.03889236         | 0.2252936           |                       |
| 0.5274637          | 0.01801495                        | 0.03492329          | 0.1138630.08227705 | 0.1401451           |                       |
| 0.07704381         | 0.06734316                        | 0.0376514           | 0.06607177         | 0.06386573          | 0.02920446            |
| 0.02943239         | 0.1825663                         | 0.03436158          | 0.07553047         | 0.4683036           | 0.04641957            |
| 0.2243928          | 0.01207302                        | 0.3074480.1205368   | 0.101422118        | 0.2636326           |                       |

|                   |                    |                           |                   |                           |             |
|-------------------|--------------------|---------------------------|-------------------|---------------------------|-------------|
| 0.06277433        | 0.01357636         | 0.539762856               | 0.05976263        | 0.05233225                | 0.02047483  |
| 0.0528421         | 0.2764586          | 0.2900065                 | 0.2142689         | 0.09183715                | 0.1953362   |
| 0.1339920.3703276 | 0.01374759         | 0.3647919                 | 0.05973563        | 0.079091846               |             |
| 0.1387642         | 0.2732225          | 0.05812645                | 0.1028881         | 0.2999943                 | 0.07828659  |
| 0.136880757       | 0.08616443         | 0.1414633                 | 0.09475432        | 0.063315969               | 0.1139813   |
| 0.0961853         | 0.1892155          | 0.09870197                | 0.02474061        | 0.0991615                 | 0.1822792   |
| 0.07274308        | 0.1664021          | 0.04843766                | 0.256837873       | 0.06723813                | 0.27587171  |
| 0.1952663         | 0.1129822          | 0.3794295                 | 0.01520297        | 0.04632817                | 0.04303995  |
| 0.07860918        | 1.36434            | 0.1259101                 | 0.2450009         | 0.09489691                | 0.1088235   |
| 0.03938299        | 0.0543998          | 0.08626085                | 0.04191739        | 0.1222670.3975850.6108256 |             |
| 0.184849682       | 0.1453964          | 0.07545997                | 0.1536193         | 0.2832182                 | 0.29561994  |
| 0.06349093        | 0.2516315          | 0.3592611                 | 0.03734463        | 0.2339066                 | 0.4207158   |
| 0.08527712        | 0.1043315          | 0.01596389                | 0.1070596         | 0.07546153                | 0.03359317  |
| 0.1692994         | 0.01621328         | 0.06889431                | 0.01169077        | 0.03039868                | 0.1146105   |
| 0.1082917         | 0.185077196        | 0.03360394                | 0.03205332        | 0.401746684               | 0.1266477   |
| 0.04269712        | 0.08179705         | 0.5666459                 | 0.06316413        | 0.1355317                 | 0.217797908 |
| 0.03828874        | 0.01565916         | 0.1556849                 | 0.01895559        | 0.01643277                | 0.3523505   |
| 0.1903867         | 0.2235523          | 1.5408780.15690157        | 0.08888513        | 0.06387772                |             |
| 0.1500151         | 0.02007816         | 0.1049662                 | 0.3011217         | 0.06128146                | 0.09429769  |
| 0.2684023         | 0.1222865          | 0.8564939                 | 1.0249850.1864609 | 0.03254905                |             |
| 0.8255862         | 0.02856413         | 0.2691648                 | 0.06430901        | 0.059153493               | 0.3234262   |
| 0.2458380.1769333 | 0.05396996         | 0.12595                   | 0.1360848         | 0.100325276               | 0.1946061   |
| 0.5310545         | 0.03518197         | 0.05553313                | 1.418919171       | 0.2370710.7065227         |             |
| 0.09310027        | 0.02904636         | 0.03183751                | 0.04456815        | 0.07419197                | 0.1033157   |
| 0.1051427         | 0.2539116          | 0.03102687                | 0.01596855        | 0.05921836                | 0.082868959 |
| 0.069100295       | 0.0772851          | 0.092549533               | 0.14080245        | 0.3867868                 | 0.031796084 |
| 0.1637214         | 1.1321920.05573901 | 0.051867938               | 0.1386924         | 0.5088639                 |             |
| 0.03419544        | 0.252354266        | 0.1014372                 | 0.07770392        | 0.1504085                 | 0.01914185  |
| 0.2746053         | 0.2087873          | 0.07330676                | 0.06385222        | 0.3094793                 | 0.03044474  |
| 0.06945856        | 0.099938709        | 0.15796                   | 0.147486719       | 0.09986537                | 0.6027524   |
| 0.1374910.2803409 | 0.1195839          | 0.13943                   | 0.2668532         | 0.5407063                 | 0.04974629  |
| 0.166523871       | 0.07823012         | 0.05218011                | 0.07076681        | 0.07309898                | 0.145584    |
| 0.04198088        | 0.1502428          | 0.03418395                | 0.1384439         | 0.02501734                | 0.0447074   |
| 0.4065409         | 0.4102119          | 0.3800425                 | 0.038126785       | 0.1187037                 | 0.02112272  |
| 0.0856028         | 0.03467642         | 0.1162736                 | 0.07074271        | 0.1365780.0161357         |             |
| 0.2708305         | 0.06902702         | 0.044492588               | 0.123751115       | 0.3663328                 | 0.316786    |
| 1.6515940.1147525 | 0.2372776          | 0.7922880.1747270.2020171 |                   | 0.3517339                 |             |
| 0.04798261        | 0.0689555          | 0.02614804                | 0.1226062         | 0.1134032                 | 0.1397049   |
| 0.1329996         | 0.04579392         | 0.1432909                 | 0.096651479       | 0.007687222               | 0.05991722  |
| 0.7327466         | 0.04235382         | 0.09462866                | 0.06975176        | 0.04133793                | 0.02415279  |
| 0.04594997        | 0.04287342         | 0.09436569                | 0.118095766       | 0.9829604                 | 0.0301657   |
| 0.4190958         | 0.08328571         | 0.1124139                 | 0.23744746        | 0.3200552                 | 0.1128434   |
| 0.2471449         | 0.4599047          | 0.16225                   | 0.1747422         | 0.422558094               | 0.5318043   |
| 0.0908476         | 0.3076469          | 0.06969548                | 0.128615988       | 0.05670805                | 0.124604    |

|             |             |             |             |             |             |
|-------------|-------------|-------------|-------------|-------------|-------------|
| 0.4374966   | 0.017065029 | 0.072794977 | 0.1740053   | 0.02501737  | 0.05958878  |
| 0.03953606  | 0.07251507  | 0.0745114   | 0.1812164   | 0.2057639   | 0.2246322   |
| 0.1491327   | 0.1369612   | 0.07458317  | 0.097841343 | 0.1218329   | 0.3152884   |
| 0.2788531   | 0.1400094   | 0.2226725   | 0.2724553   | 0.1325727   | 1.735257    |
| 0.06854614  | 0.1175466   | 0.05888325  | 0.02172224  | 0.1410138   | 0.04469194  |
| 0.1667279   | 0.05406884  | 0.1445505   | 0.1149606   | 0.1218904   | 0.04370678  |
| 0.2439030   | 0.09501642  | 1.3212      | 0.06813378  | 0.1884699   | 0.1277073   |
| 0.01355417  | 0.04467493  | 0.08570082  | 0.03352251  | 0.0231069   | 0.01952043  |
| 0.09183028  | 0.04394951  | 0.05943534  | 3.2527250   | 0.01453622  | 0.0321313   |
| 0.3838189   | 0.1756650   | 0.08489069  | 0.04424945  | 0.1834612   | 0.04484799  |
| 0.1896322   | 0.04046289  | 0.1838117   | 0.158225723 | 0.1998013   | 0.3847576   |
| 0.2480323   | 0.05951217  | 0.3454966   | 0.110829698 | 0.231575749 | 0.2255372   |
| 0.051666056 | 0.09182283  | 0.04463388  | 0           | 0.1048106   | 0.1237678   |
| 0.2441574   | 0.5693047   | 0.04395814  | 0.3334699   | 0.004795296 | 0.147576039 |
| 0.2053753   | 0.09415587  | 0.06939502  | 0.1616505   | 0.05104259  | 0.1723572   |
| 0.04563076  | 0.0409154   | 0.4081190   | 0.1847757   |             |             |
| AL137779.1  | 0.2471868   | 0.1016258   | 0.2859614   | 0           | 0.052207326 |
| 0.1150734   | 0.2020718   | 0.2326958   | 0           | 0.1288534   | 0.09397105  |
| 0.042114727 | 0.318925242 | 0.136109756 | 0.2792476   | 0           | 0.2375358   |
| 0.1921389   | 0.052475051 | 0.0428576   | 0.02593239  | 0.05381545  | 0.03356383  |
| 0.2559137   | 0.2094830   | 0.1027806   | 0.04150546  | 0.068586101 | 0.3120307   |
| 0.026046728 | 0.05801061  | 0.3254335   | 0.04167799  | 0.080713143 | 0.06729011  |
| 0.09904399  | 0.06377317  | 0           | 0           | 0.09738104  | 0.1179825   |
| 0.1067229   | 0.03331163  | 0           | 0           | 0           | 0           |
| 0.09622808  | 0.03693903  | 0           | 0.1327142   | 0.2806143   | 0.04768334  |
| 0.0361027   | 0.04276705  | 0           | 0.090292211 | 0.1242540   | 0.1087786   |
| 0.03715439  | 0.1747102   | 0           | 0.124526355 | 0.1605133   | 0.04255741  |
| 0           | 0.03478006  | 0.09417468  | 0.2642540   | 0.1835842   | 0.03928551  |
| 0.06297671  | 0.04691258  | 0.02416287  | 0.1862919   | 0.1144966   | 0.1413918   |
| 0.1537402   | 0.161284863 | 0.08419267  | 0.1111229   | 0.1054452   | 0.120788085 |
| 0.09819985  | 0.08286782  | 0.05156672  | 0.07322547  | 0.07624251  | 0.0923857   |
| 0.2253835   | 0.03597798  | 0           | 0           | 0.054441162 | 3.0201850   |
| 0.099566747 | 0.08786483  | 0.2030193   | 0.04949302  | 0.09579203  | 0.07775858  |
| 0           | 0.06231853  | 0           | 0.1162577   | 0           | 0.03823425  |
| 0.2350859   | 0.07594159  | 0.06940288  | 0.2019039   | 0           | 0.07281048  |
| 0.2015373   | 0.06814547  | 0.254689418 | 0.1304389   | 0.04308035  | 0.0631256   |
| 0           | 0.05618206  | 0.02588146  | 0.2696584   | 0.02368673  | 0           |
| 0.0373225   | 4.5216230   | 0.1443406   | 0.07360074  | 0.05203923  | 0.07611405  |
| 0.03732926  | 0.1205099   | 0.088268095 | 0           | 0.1167375   | 0.156868256 |
| 0           | 0.1129977   | 0.1421023   | 0           | 0.1508233   | 0.101457786 |
| 0.1704350   | 0.02531315  | 0.1462946   | 0.3360901   | 0.05497102  | 0.0347128   |
| 0.1122879   | 0.091097892 | 0           | 0           | 0.05488466  | 0.06703055  |
| 0.04918283  | 0.2946052   | 0.2248650   | 0.1886433   | 0.1484550   | 0.09584543  |
| 0.09560586  | 0.03951432  | 0.08890979  | 0.04768039  | 0.03993785  | 0.04293888  |
| 0           |             |             |             |             |             |



|             |             |             |             |             |             |             |
|-------------|-------------|-------------|-------------|-------------|-------------|-------------|
| 0.1262655   | 0           | 0.1566762   | 0.3822561   | 0.08653649  | 0.311566518 | 0.1423975   |
| 0.1156249   | 0.07418168  | 0.1059407   | 0.216138452 | 0.2566887   | 0.0464771   |             |
| 0.03885168  | 0.02585885  | 0           | 0.04959663  | 0.1415363   | 0.1133975   | 0.08509502  |
| 0.3178796   | 0.0828661   | 0.1599321   | 0.07531405  | 0.058243458 | 0.025632223 |             |
| 0.6518269   | 0.034330538 | 0.073735887 | 0.03513688  | 0           | 0           | 0.0975433   |
| 0.216450142 | 0.2002257   | 0.05592864  | 0.1427010   | 0.046804437 | 0.05889497  |             |
| 0.06103837  | 0.5356115   | 0.08520627  | 0.05023367  | 0.1086284   | 0.06992377  |             |
| 0.05329235  | 0           | 0.05420756  | 0.1464544   | 0.10820869  | 0.1808045   | 0.10365928  |
| 0.2469620   | 0.1403914   | 0.1760590   | 0.3608338   | 0.04315985  | 0.03052357  | 0.1353242   |
| 0.3154609   | 0.03907695  | 0.222374699 | 0.1790878   | 0.08710115  | 0           | 0           |
| 0.02945633  | 0.03114497  | 0.1605065   | 0.07608165  | 0.09603997  | 0.3758395   |             |
| 0.1592051   | 0.1457427   | 0.1846496   | 0.07097984  | 0.029949539 | 0.04803514  |             |
| 0.1410356   | 0.0952611   | 0.02315331  | 0.04196509  | 0           | 0.2104445   | 0.05386874  |
| 0.07948682  | 0           | 0.139800142 | 0           | 0.05789326  | 0.0640960   | 0.1164891   |
| 0.1188220   | 0.1360791   | 0.1851818   | 0           | 0.5693366   | 0.07119513  | 0.08769776  |
| 0.09976539  | 0.05116482  | 0.4130121   | 0.05653359  | 0.03861014  | 0.07976459  | 0           |
| 0.064533822 | 0.06843638  | 0           | 0.1449636   | 0           | 0.2614477   | 0.3224283   |
| 0.6022074   | 0.05375575  | 0.1227225   | 0.08808129  | 0.1976709   | 0.053459044 |             |
| 0.1508779   | 0.1726416   | 0.1622195   | 0.1271075   | 0.07148409  | 0.047326196 |             |
| 0.08904152  | 0.05108144  | 0.08250885  | 0.08900771  | 0.02579374  | 0.05185541  |             |
| 0.097852168 | 0.06148636  | 0.03676278  | 0.09859903  | 0.09796928  | 0.026836375 | 0           |
| 0.1039970   | 0.08988147  | 0.045577017 | 0.072007299 | 0.05446064  | 0.1431772   |             |
| 0.1446807   | 0.03771153  | 0.1162033   | 0.06633464  | 0.03903144  | 0.09813412  |             |
| 0.1515011   | 0.04148973  | 0.02286212  | 0           | 0.029694677 | 0.2270158   | 3.60886     |
| 0.1731992   | 0.2370010   | 0.2672855   | 0.2646071   | 0.0694261   | 0           | 0           |
| 0.09072951  | 0.06446159  | 0.09910989  | 0.06631252  | 0.04452943  | 0.02123621  |             |
| 0.02797559  | 0.09304095  | 0.1479741   | 0.06037831  | 0.34742     | 0.06042105  |             |
| 0.04356348  | 0           | 0.1573008   | 0.02991918  | 0.04525034  | 0.04261326  | 0.2409352   |
| 0.05595712  | 0.06171356  | 0.1737829   | 0.1599515   | 0           | 0.2910215   | 0.4540415   |
| 0           | 0           | 0.1525443   | 0.2345817   | 0.03435224  | 0.06565598  | 0.02692227  |
| 0.07486208  | 0           | 0.07204512  | 0.1291899   | 0.369763477 | 0.2183016   | 0.1370140   |
| 0           | 0.1835008   | 0           | 0.195312301 | 0.1882379   | 0.043121534 | 0.04541463  |
| 0.1192075   | 0           | 0.1076641   | 0.04861136  | 0.03622732  | 0.09139883  | 0.09623357  |
| 0.01677182  | 0.03029341  | 0.09605402  | 0.088241153 | 0.3199661   | 0.07620305  |             |
| 0.2014556   | 0.05396671  | 0.02621611  | 0.1663840   | 0.07616871  | 0.03642541  |             |
| 0.1202204   | 0.1644987   |             |             |             |             |             |
| AC069277.1  | 0           | 0           | 0.06799506  | 0           | 0.010344753 | 0.02280152  |
|             | 0.02402402  |             |             |             |             |             |
| 0.007684682 | 0.0173127   | 0           | 0.0279302   | 0.058414505 | 0.08457295  | 0           |
| 0           | 0           | 0           | 0           | 0           | 0           | 0           |
| 0           | 0.04706714  | 0.03263302  | 0.7784388   | 0.322331861 | 0.1188898   | 0.005138439 |
| 0           | 0.01330118  | 0           | 0.3268798   | 1.8074590   | 0.027180334 | 0.0494625   |
| 0.01032219  | 0           | 0           | 0.04955035  | 0.063972442 | 0.1400004   | 0.02943798  |
| 0           | 0           | 0           | 0           | 0           | 0           | 0           |
| 0.1689532   | 0           | 0.1286388   | 0.4324919   | 0.2114687   | 0.08580311  | 0           |
| 0.1906101   | 0.2332596   | 0.2906509   | 0.1439023   | 0.2467290   | 0.0207557   |             |
| 0.1136389   | 0.188490767 | 0           | 0.1946987   | 0.2415395   | 0.05556366  | 0.2734888   |

|             |             |             |             |             |             |             |            |           |
|-------------|-------------|-------------|-------------|-------------|-------------|-------------|------------|-----------|
| 0           | 0.08503503  | 0           | 0.1118102   | 0.01694837  | 0           | 1.574423765 | 0          | 0.2491557 |
| 0           | 0.051534356 | 0.007530225 | 0           | 0.04213795  | 0.016449727 | 0.01817447  |            |           |
| 0.1011917   | 0           | 0.6284623   | 0.1516148   | 0.009330241 | 0.3141677   | 0           |            |           |
| 0.2335298   | 0.3078074   | 0.009512761 | 0.009295612 | 0.1005441   | 0.01845664  |             |            |           |
| 0.1361233   | 0.1167352   | 1.6754780   | 0.314255615 | 0           | 0           | 0.1532205   | 0          |           |
| 0.1459354   | 0.2709309   | 0           | 0           | 0.1208581   | 1.3546440   | 0.2590233   | 0.08554738 |           |
| 0.2786758   | 0.08971783  | 0           | 0.9542727   | 0.605019768 | 0           | 0           | 0.0638374  |           |
| 0.1206833   | 0.01471038  | 0.2942048   | 0.02311151  | 0.1517523   | 0.1835802   |             |            |           |
| 0.07408958  | 0.2594717   | 1.0711820   | 0.02977407  | 0           | 0.004658168 | 0.403732    |            |           |
| 0.09028583  | 0.4400643   | 0.2000338   | 0.112090216 | 0.1202268   | 0.09698288  |             |            |           |
| 0.4778933   | 0.33082     | 0.340646043 | 0.006461538 | 0.05121759  | 0.1000655   |             |            |           |
| 0.08028772  | 0.0663137   | 0.7347342   | 0.2102622   | 0.06233751  | 0.06101507  |             |            |           |
| 0.6940474   | 1.2202350   | 0.004938284 | 8.2987220   | 0.007150184 | 0.2041733   | 0.01031145  |            |           |
| 0.2211999   | 0           | 0           | 0.09619558  | 0.1667205   | 0.007710418 | 0.22379802  |            |           |
| 0.1535947   | 0           | 0.1119511   | 0           | 0.1504217   | 0.2390822   | 0           | 0.3968125  |           |
| 0.02486093  | 0.2832152   | 0           | 0.2536442   | 0.3995726   | 0           | 0.1650781   |            |           |
| 0.07231112  | 0.009025411 | 0.06859831  | 0           | 0.1631289   | 0.03320485  | 0.009745456 |            |           |
| 0.1317514   | 1.3037150   | 0.00891129  | 0.03114934  | 0           | 0           | 0.05998954  | 0.6006416  |           |
| 0.1565933   | 0.005872419 | 0           | 0.1820125   | 0.5870680   | 0.210965676 | 0.2456466   |            |           |
| 0.006254798 | 0.008360246 | 0.1303890   | 0.06816879  | 0.1886169   | 0.092604206 | 0           |            |           |
| 0.1298278   | 0           | 0.08396758  | 0.014275767 | 0.2034489   | 0.04604661  | 0.5773774   |            |           |
| 0.2459457   | 0           | 0.06879215  | 0.3926309   | 0.0561736   | 0.09273753  | 0           |            |           |
| 0.3612337   | 0           | 0           | 0.56549909  | 0.010157924 | 0.1937368   | 0.006802511 |            |           |
| 0.094968797 | 0.6544549   | 0           | 0.01375284  | 0.01932796  | 0.00526743  | 0.360268123 |            |           |
| 0.3173939   | 0           | 0.005655171 | 0.009274184 | 0.1867183   | 0.3265543   | 0.02653252  |            |           |
| 0           | 0.1791662   | 0.1004474   | 0.08313134  | 0.4963082   | 0           | 0.005370548 |            |           |
| 0.004836595 | 0.221559948 | 0.07165194  | 0           | 0.08318933  | 0.2457276   | 0.3638075   |            |           |
| 0.2144950   | 0.05986412  | 1.0705260   | 0.04861718  | 0           | 0.025178856 | 0           | 0.4314719  |           |
| 0.2111568   | 0.02930657  | 0.09338719  | 0           | 0.2385297   | 0.2713570   | 0.01654926  |            |           |
| 0.1340709   | 0.7508424   | 0.02439191  | 0.1125158   | 0.302655793 | 0.4521071   |             |            |           |
| 0.08383756  | 0.05033534  | 0           | 0.008315279 | 0           | 0.2432446   | 0.2935338   |            |           |
| 0.03150023  | 0.00794125  | 0.36703896  | 0.215428463 | 0.1835425   | 0.1778065   |             |            |           |
| 0.007694006 | 0.3742545   | 0.1569619   | 0.02696375  | 0.003669331 | 0           | 0.02820316  |            |           |
| 0.2962499   | 0.1303282   | 0.4299598   | 0.005069092 | 0           | 0.01120199  | 0.09180605  |            |           |
| 0.01053677  | 0.1045943   | 0.006393609 | 0.1559457   | 0.05765228  | 0.01436209  |             |            |           |
| 0.1921204   | 0.03453681  | 0.01419742  | 0.1591012   | 0.1491220   | 0.01215858  |             |            |           |
| 0.4101476   | 0.6903361   | 0           | 0.007474021 | 0.5131277   | 0.08839435  | 0.06296512  |            |           |
| 0.3753565   | 0           | 0.3219913   | 0.1518249   | 0.3487771   | 0.1499116   | 0.01022193  |            |           |
| 0.0513751   | 0.019389166 | 0.04264179  | 0.02185337  | 0.3321316   | 0.07764948  |             |            |           |
| 0.010635123 | 0.3751304   | 0.8757870   | 0.008904896 | 0.090309736 | 0.185484895 |             |            |           |
| 0.06834453  | 0.4019112   | 0.2365121   | 0.1419765   | 0.007675131 | 0           | 0.2010836   |            |           |
| 0.2398221   | 0.1681096   | 0.6823502   | 0.4212968   | 0.1480129   | 0.20005352  |             |            |           |
| 0.3523639   | 0.1721505   | 0           | 0.1617551   | 0.05296197  | 0           | 0.05502644  |            |           |
| 0.0107657   | 0.1173611   | 0.4887673   | 0.2337118   | 0           | 0.05891514  | 0.1313966   |            |           |

0 0 0.3048812 0.01843584 0 0.3270109 0.4216475 0.5626972  
1.3379590 0.07792189 0.2074944 0.01793249 0.2955299 0 0.09424601  
0 0.008608661 0.9508196 0.2264643 0.09436121 0.009996356 0.1442382  
0.8431242 0.006045254 0.07437085 0.2110111 1.0928040.2133832  
0.8158555 0.9953258 0.5924358 0.1599916 0.701276764 0.009612429  
0.1968301 0.6420376 0.01049813 0.1246637 0.030547978 0.051600868 0  
0.145255238 0.1709771 0.2913216 0.1217172 0.00853335 0.06260944  
0.8183324 0.2475095 0.1430133 0 0.09604103 0.5519531 0.104908602  
0.02717164 0.007549723 0.06386869 0.06416022 0.1818130.07143191  
0.07546321 0.2093105 0.2382137 0.08148751  
AP001189.3 0.7278151 1.2156070.4999273 1.361168172 0.984761684 0.8823475  
3.6442451.2846521.2461021.5215330.3026272 1.782533308 0.5082325  
1.304224064 1.66983602 0.6607083 0.5719473 0.3059870.1515355  
0.5069506 0.531118447 1.0252910.1193049 0.02475841 0.2779456  
0.3237740.2409377 0.07092811 1.6421750.189322925 1.9810360.431391428 0  
0.5988776 0.9970707 0.024755337 0.8358548 0.2278316 0.4694332  
1.1768330.03766519 0.2090726 0.4885128 1.5057050 0.06130159  
0.1142093 0 0.1396214 0.6682281 0.1909528 0.3469741 0.1623681  
0.45273128 0.3588425 0.1205477 0.1019653 0.09382429 0.3174948  
0.5532850.3948708 0.9301297 0.4450327 0.1574038 0.07224714  
0.290779756 0.1143289 0.07713239 0.1668162 0.615358889 0.2447728 0  
0.02795327 1.183988673 0.3797794 0.1566322 0.3810597 0.1945562  
0.2240135 0 0.06947034 0.3378401 0.2530325 0.7533021 0.353389567  
0.2374094 0.2223281 0.3142543 0.03511699 0.1734638 0 0.964612312  
0.0774676 0.1635948 0 0.277849704 0.5421356 0 0.7117157 0  
0.07015247 2.0401490 0.2317292 0.1811692 1.1605730.275509078  
1.0514910.335916689 0 0.08166122 1.4282870.3736053 0.1138492  
0.04407022 0.6439271 0 0.1262930.9461217 0.2332044 0 0.2765193  
0.4573427 0.6921852 0.1648158 0.3843158 0 0.4087081 3.123029702  
0 0.6622826 1.4284230.2194577 0.234345562 0.9601588 1.149537  
0.2323332 0.02867893 0.2395057 0.3618608 0 0.2067657 0.4794834  
0.2630935 0.1373651 0.2751785 0.5200561 0 0.1354435 2.058947  
0.09337904 0.1717375 0.9609940.081217494 0.4129 0.3938472 0.057735229  
0.1620991 1.1148390.1732863 0.5556941 0.1552227 0 0.311178771 0  
0 0.3586760.09316482 0.5720883 0.3710931 0.6196062 0.03194004  
2.0663740.461016905 0.6825961 0.1569763 0.2272528 0.3700581  
0.1357627 0.2039347 0.1807153 0.08276138 1.4464590.1365968  
0.3821548 1.2755520.03320422 0.03635803 3.2723170 0 0.1185271  
0.505623497 0.5151506 0.1742696 0.3882185 0.8649683 0.6682729  
0.0265414 0.086003845 0.06551161 0.1063891 0.2730251 0.6823495  
0.729204435 0.6691913 0.7269989 0.5362248 0.04758665 0.06018392  
0.0228175 0.1953461 0.3130190 0.8287169 0.1143705 0.1962095  
0.03464909 0.321546835 0.212263158 0.04998007 0.189529882 0.203538231  
0.2263117 0.039068645 0.3831783 2.7823060.2201397 0 0 0.07719183

|             |             |             |             |             |             |
|-------------|-------------|-------------|-------------|-------------|-------------|
| 0.07878149  | 0.602921677 | 0.1625718   | 0.2246512   | 0.5852337   | 0.03920012  |
| 0.04622115  | 0.1332687   | 0           | 0.04903551  | 2.3638090   | 1.496329    |
| 0.630580186 | 0.2218165   | 0.127172368 | 0.7726002   | 0.3660026   | 0.2777072   |
| 0           | 0.02808543  | 0.1245149   | 0.06450285  | 0.0359556   | 1.139981424 |
| 0.4007188   | 0.2775094   | 0           | 0.2439310   | 0.05731439  | 0.3692142   |
| 2.2313060   | 0.1098662   | 0.6034554   | 0.2265337   | 0.3592059   | 0.413358843 |
| 0.3535859   | 0.5839653   | 0.2629558   | 0.5539011   | 0.1544522   | 0           |
| 0.3221781   | 1.2799090   | 0.2581333   | 0.578849896 | 0           | 0.2663446   |
| 1.2147550   | 0.4262767   | 0.03644362  | 1.4712120   | 0.51117     | 0.06619292  |
| 0.7205909   | 0.6051953   | 0.04589821  | 0.07061689  | 1.5834250   | 0.1213750   |
| 0.5382170   | 0.2124924   | 1.068822833 | 0.3463343   | 0.03346445  | 1.24492     |
| 0           | 0.1977825   | 0.4155786   | 0.2473095   | 0.1411497   | 0           |
| 0.319727782 | 0.6247179   | 0.1059010   | 0.3358393   | 0.3508637   | 0.1973225   |
| 0.174183665 | 1.0036320   | 0.6815175   | 0.2783670   | 0.2456941   | 0.1186670   |
| 1.6689630   | 0.4735679   | 0.1512054   | 1.1718690   | 0.44446974  | 0           |
| 0.2481060   | 0.083872913 | 0.033127782 | 0.5512153   | 0.1317406   | 0.09984304  |
| 0.2775940   | 0.1425617   | 0.1220720   | 0.1077412   | 0.3611818   | 1.6727950   |
| 0.04207193  | 0.08591458  | 0.245904767 | 0           | 0.5534324   | 0.3585703   |
| 0.2151936   | 1.3086570   | 0.4152235   | 0           | 0.1486312   | 0.4126641   |
| 0.2075941   | 0.1139916   | 0.4271097   | 0.04097255  | 0.2149392   | 0.5405606   |
| 0.04280455  | 0.03403859  | 0.07407396  | 0.8790899   | 0.1389870   | 0.2405025   |
| 0.2344095   | 0.1447360   | 0.7708211   | 0.04163587  | 0.07841887  | 0.1662675   |
| 0.05148743  | 0.05678406  | 0           | 0.7849333   | 0.2273763   | 0.4138349   |
| 0.3572203   | 0.03290044  | 0.08421569  | 0.08633759  | 0.03160828  | 0.3926752   |
| 0.3220333   | 0.1377646   | 0           | 0.09943554  | 0.1485882   | 0.291623861 |
| 0.09455226  | 0.5300235   | 0           | 0.5306504   | 0.794378813 | 0.898556593 |
| 0.238062664 | 0.1253611   | 0           | 0           | 0.4160696   | 0.5591053   |
| 0.4765562   | 0.1328201   | 0.07716068  | 0.6968415   | 0.1178420   | 0.216513879 |
| 0.2102915   | 0.2804647   | 0.1112183   | 0.3475920   | 0.2170984   | 0.2296406   |
| 0.02336152  | 0           | 1.17992     | 0.6306624   |             |             |
| AC011405.1  | 0.04976971  | 0.01278863  | 0.07197096  | 0           | 0.032848937 |
| 0.009760838 | 0           | 0.03242992  | 0.03547604  | 0.042397851 | 0.02527573  |
| 0.022837463 | 0.05020088  | 0.0782222   | 0.02391327  | 0.08289885  | 0.09646323  |
| 0.026413912 | 0.2696607   | 0.08484686  | 0.02031646  | 0.1098158   | 0.09661279  |
| 0.2767949   | 0.05820278  | 0.1044612   | 0.025892694 | 0.02355963  | 0.104887328 |
| 0.0876009   | 0.1310485   | 0.05244772  | 0.108341004 | 0.00846781  | 0.07478237  |
| 0.09630284  | 0.1072995   | 0.02060507  | 0.03267857  | 0.1336226   | 0.1611605   |
| 0.6660156   | 0.1676779   | 0.05466929  | 0.02962789  | 0.05728585  | 0.09139003  |
| 0.03482081  | 0.03163588  | 0.1221342   | 0.024767064 | 0.009815398 | 0.1154067   |
| 0.1394526   | 0.05774333  | 0.1002048   | 0.02017863  | 0.02400195  | 0.05451811  |
| 0.04057651  | 0.03229092  | 0.009880859 | 0.034087207 | 0.03127233  | 0.07032659  |
| 0.07300661  | 0.009351042 | 0.02869396  | 0           | 0.09175249  | 0.073128712 |
| 0.02142175  | 0.05685329  | 0.08514696  | 0.1225486   | 0.1303607   | 0.04750545  |
| 0.06160613  | 0.02966221  | 0.1003835   | 0           | 0.01180699  | 0.04256928  |
|             |             |             |             |             | 0.007814344 |

|             |             |             |             |             |              |
|-------------|-------------|-------------|-------------|-------------|--------------|
| 0.05763317  | 0.3617868   | 0.01547737  | 0.060888424 | 0.09182189  | 0.03356099   |
| 0.01769234  | 0.121600106 | 0.2347925   | 0.03128434  | 0.02595669  | 0.1382208    |
| 0.04477379  | 0.03100226  | 0.3176582   | 0.0724397   | 0.06371372  | 0.05697836   |
| 0.047956259 | 4.4580140   | 0.0410172   | 0.04467349  | 0.04422776  | 0.03832202   |
| 1.6504780   | 0.0482180   | 0.1623166   | 0.1036345   | 0.1019484   | 0.04252551   |
| 0.04388972  | 0.04727259  | 0.1058510   | 0.1479164   | 0.1352459   | 0.05733909   |
| 0.1834073   | 0.1626090   | 0.090601263 | 0.1221666   | 0.06521535  | 0.06279361   |
| 0.02572635  | 0.064100404 | 0.05745068  | 0.02168498  | 0.01588749  | 0.03137812   |
| 0.04679419  | 0.08483963  | 0.08468021  | 0.1018017   | 0.05961491  | 0.1349322    |
| 0.05636011  | 0           | 3.1152890   | 0.1180652   | 0.1018814   | 0.01309727   |
| 0.02818516  | 0.01011001  | 0.088861494 | 0.02823508  | 0.03917411  | 0.015792283  |
| 0.1064133   | 0.08968863  | 0.1421967   | 0.0268233   | 0.09553043  | 0.07591864   |
| 0.008511655 | 0.08579038  | 0.01052585  | 0.1417122   | 0.1401582   | 0.05522928   |
| 0.03383496  | 0.06571693  | 0.03494616  | 0.04945623  | 0.022927579 | 0.09957873   |
| 0.04293764  | 0.07597374  | 0.03374059  | 0.0742702   | 0.0318755   | 0.3048243    |
| 0.2376956   | 0.03165192  | 0.1587938   | 0.008040814 | 0.008020715 | 0.1271526    |
| 0.01988998  | 0.02237688  | 0.08400164  | 0.2211348   | 0.06484131  | 0.051863587  |
| 0.1308439   | 0.02383393  | 0.01061892  | 0.03943238  | 0.03848259  | 0.02177956   |
| 0.039207635 | 0.0358387   | 0.07760148  | 0.03111683  | 0.01333162  | 0.036265247  |
| 0.01076726  | 0.01169739  | 0.08800396  | 0.2017534   | 0.05761725  | 0.02496503   |
| 0.03562194  | 0.03805329  | 0.1820426   | 0.08000415  | 0.08342318  | 0.05366908   |
| 0.03791018  | 0.058635011 | 0.019353406 | 0.3144334   | 0.077762996 | 0.046394744  |
| 0.1238058   | 0.053432117 | 0.05240526  | 0.04909952  | 0.1271199   | 0.065371581  |
| 0.1385806   | 0.04222847  | 0.1221113   | 0.10601795  | 0.02964545  | 0.01536218   |
| 0.05055115  | 0.05897312  | 0.1264284   | 0.1458116   | 0.07039385  | 0.1140076    |
| 0.04216769  | 0.05457198  | 0.0552896   | 0.018156024 | 0.2275250   | 0.104356149  |
| 0.04972444  | 0.05888969  | 0.04431064  | 0.05675931  | 0.0651750   | 0.03072877   |
| 0.1362340   | 0.07057371  | 0.09834914  | 0.047972069 | 0.1051702   | 0.05480419   |
| 0.09108838  | 0.1861213   | 0.09637666  | 0.0548701   | 0.05049547  | 0.1053155    |
| 0.0241714   | 0.06306103  | 0.02003442  | 0.07336124  | 0.06196364  | 0.2054389    |
| 0.052764041 | 0.04835807  | 0.03549593  | 0.04795076  | 0.0291362   | 0 0.03962681 |
| 0.1235846   | 0.05423088  | 0.03000794  | 0.01008672  | 0.035184994 | 0.032835643  |
| 0.1748474   | 0.1935807   | 0.009772681 | 0.01793834  | 0.0199368   | 0.01712424   |
| 0.1165167   | 0.02715856  | 0.5104742   | 0.05375531  | 0.06621549  | 0.1757631    |
| 0.03863159  | 0           | 0.04742804  | 0.02915228  | 0.05353388  | 0.06642619   |
| 0.1291809   | 0.04576755  | 0.03648453  | 0.01016771  | 0.05483444  | 0.07213243   |
| 0.6946682   | 0.08117569  | 0.1235475   | 0.09975761  | 0.01243749  | 0.074000344  |
| 0.02847979  | 0.04345056  | 0.06124128  | 0.04798577  | 0.02698675  | 0.041688811  |
| 0.08964012  | 0.03214053  | 0.1522831   | 0.01120076  | 0.1038686   | 0.05220401   |
| 0.049254999 | 0.03868732  | 0.06476738  | 0.07444641  | 0.006164243 | 0.027016788  |
| 0.1089094   | 0.03926106  | 0.01131071  | 0.195004523 | 0.072491382 | 0.1142224    |
| 0.06005821  | 0.01820667  | 0.07593011  | 0.1754767   | 0.01669515  | 0.2062926    |
| 0.01646564  | 0.09913772  | 0.09397946  | 0.0632935   | 0.04700033  | 0.029894305  |
| 0.03809033  | 4.5077610   | 0.02179545  | 0.01988285  | 0.1345412   | 0.09989474   |

|             |             |             |             |             |             |             |            |
|-------------|-------------|-------------|-------------|-------------|-------------|-------------|------------|
| 0.04368302  | 0.0273485   | 0.16262     | 0.05643788  | 0.1522324   | 0.05678308  |             |            |
| 0.0561241   | 0.1001375   | 0.1232792   | 0.0481027   | 0.09857281  | 0           | 0.1582794   |            |
| 0.1063724   | 0.02185972  | 0.3801702   | 0.01096409  | 0.05495819  | 0           | 0.06777072  |            |
| 0.04555454  | 0.0643496   | 0.06063873  | 0.05633331  | 0.1553211   | 0.03280334  |             |            |
| 0.03354724  | 0.05441983  | 0.0599273   | 0.03809116  | 0.03664135  | 0.2429795   | 0           |            |
| 0.04723174  | 2.7839460   | 0.2439293   | 0.09420669  | 0.01044819  | 0.05439709  |             |            |
| 0.0325146   | 0.106356938 | 0.0305235   | 0.04310471  | 0.0724885   | 0.1600127   |             |            |
| 0.01979298  | 0.031040853 | 0.057349053 | 0.09475167  | 0.03255857  | 0.1257298   |             |            |
| 0.1300096   | 0.4638038   | 0.17884     | 0.02446908  | 0.02735315  | 0.0843455   |             |            |
| 0.09688051  | 0.08020171  | 0.0228728   | 0.04834988  | 0.088834371 | 0.2300836   |             |            |
| 0.1054836   | 0.09126446  | 0.05432951  | 0.03299044  | 0.03489636  | 0.006390064 |             |            |
| 0.03667028  | 0.01008571  | 0.1656045   |             |             |             |             |            |
| AL356124.1  | 0.1028228   | 0           | 0.03965067  | 0           | 0.054291993 | 0.1063719   | 0.02801875 |
| 0.05377499  | 0           | 0.01488874  | 0.03257445  | 0           | 0.1044379   | 0           | 0.05531393 |
| 0.2962756   | 0.0988083   | 0.03805927  | 0.03321506  | 0.14552109  | 0.2377009   |             |            |
| 0.1258501   | 0.01865478  | 0.2326937   | 0.1108885   | 0.09076993  | 0.08907061  |             |            |
| 0.0863256   | 0.071324783 | 0.02163269  | 0.036115718 | 0.08043601  | 0           | 0.2022637   |            |
| 0.037304917 | 0.04665136  | 0.2403307   | 0.08842622  | 0.1182281   | 0.2270374   |             |            |
| 0.2475477   | 0.2044894   | 0.4932639   | 0.1667842   | 0.06928357  | 0.2796739   | 0           |            |
| 0.2279352   | 0.1258728   | 0.02397961  | 0.01452419  | 0.1835098   | 0.068224089 |             |            |
| 0.2974156   | 0.2043660   | 0.2048748   | 0.0530205   | 0.09200906  | 0.08337697  | 0           |            |
| 0.1001181   | 0.05588662  | 0.1185994   | 0.4627078   | 0.312992098 | 0.3158602   |             |            |
| 0.07748948  | 0.2011062   | 0.051517314 | 0.02634707  | 0.4844973   | 0.02106201  |             |            |
| 0.057555005 | 0.0158974   | 0.3540540   | 0.1044065   | 0.02931854  | 0.07233769  |             |            |
| 0.09793513  | 0.05234397  | 0.2121276   | 0           | 0           | 0.033283653 | 0.01626194  |            |
| 0.0335036   | 0.04305125  | 0.1058387   | 0.04901256  | 0.02131721  | 0.14908894  |             |            |
| 0.03891312  | 0.1386721   | 0.07310376  | 0.167481627 | 0.03404034  | 0.143628    |             |            |
| 0.4647570   | 0.1269157   | 0.03523863  | 0.1067497   | 0.09375329  | 0.1496584   |             |            |
| 0.05850257  | 0.1121102   | 0.113230057 | 6.7908820   | 0.023009445 | 0.1129872   |             |            |
| 0.1230589   | 0.08122073  | 0.1055630   | 0.5833188   | 0           | 0           | 0.05589025  | 0.02378956 |
| 0.04320463  | 0.08785652  | 0.04029998  | 0.1823059   | 0.2650731   | 0.2281748   |             |            |
| 0.1397072   | 0.07897398  | 0           | 0.1399774   | 0.463492571 | 0.1177833   | 0.0998023   |            |
| 0.2114116   | 0.09448875  | 0.088286436 | 0.02260791  | 0.1194682   | 0.3938774   |             |            |
| 0.1080439   | 0.2062411   | 0.07790059  | 0.1076597   | 0           | 0.0821085   | 0.1486753   |            |
| 0.1552512   | 0.05183484  | 7.1708150   | 0.2001390   | 0.05102644  | 0.2164687   | 0.03517926  |            |
| 0.1035196   | 0.08354796  | 0.091792689 | 0.07777718  | 0.4046631   | 0.108754728 |             |            |
| 0.04885488  | 0.04941179  | 0           | 0.04925883  | 0           | 0.4182555   | 0.164125192 |            |
| 0.02954009  | 0.2609534   | 0.03002805  | 0.03509855  | 0.07606811  | 0.2330069   |             |            |
| 0.09527674  | 0.0721978   | 0.07784776  | 0.031578494 | 0.1714391   | 0.08870796  |             |            |
| 0.1712287   | 0.06970712  | 0.03409782  | 0.2853669   | 0.0453880   | 0.0623584   |             |            |
| 0.08718932  | 1.0034890   | 0.1328968   | 0.1877999   | 0.1501108   | 0           | 0.12328     |            |
| 0.0661124   | 0.2215071   | 0.4167655   | 0.047621658 | 0.02772512  | 0.08753821  |             |            |
| 0.5265213   | 0.4344864   | 0           | 0           | 0.172804022 | 0.04936118  | 0.05344084  |            |
| 0.1714307   | 0.03672367  | 0           | 0.01482991  | 0           | 0.05387073  | 0.05378282  | 0          |

|             |             |             |             |             |             |             |
|-------------|-------------|-------------|-------------|-------------|-------------|-------------|
| 0.08596176  | 0.02453131  | 0.4323937   | 0.3244740   | 0.3305727   | 0           | 0.2587172   |
| 0.2088570   | 0.161517739 | 0.035540976 | 0.2259516   | 0.095203667 | 0.127800336 | 0           |
| 0.07217855  | 0.2028765   | 0           | 0           | 0.1735174   | 0.0387746   | 0.1582924   |
| 0.097346729 | 0.08166224  | 0.1692684   | 0.02320828  | 0.0443043   | 0.1044791   |             |
| 0.1506213   | 0.04847724  | 0.1108407   | 0.07743758  | 0.0187907   | 0.1015349   |             |
| 0.075019682 | 0.04178314  | 0.071865635 | 0.05136466  | 0.04866578  | 0.08718529  |             |
| 0.03127018  | 0.05984432  | 0.3809087   | 0.1250914   | 0.07290166  | 0.05418309  |             |
| 0.110121069 | 0.1655457   | 0.03019305  | 0.02787942  | 0.1230469   | 0.1633735   |             |
| 0.1295544   | 0.1947348   | 0.3692249   | 0.1331665   | 0.02895163  | 0.02759371  |             |
| 0.02526038  | 0           | 0.0492094   | 0.083054508 | 0.03330214  | 0.04888907  | 0.02201443  |
| 0.4976086   | 0.08728156  | 0.2183144   | 0.02431641  | 0.0746930   | 0.08266077  |             |
| 0.1944963   | 0.07269122  | 0           | 0.04013665  | 0           | 0.1076805   | 0.1235337   |
| 0.05491851  | 0.07075643  | 0.1668994   | 0.07481179  | 1.5048460   | 0.1974346   |             |
| 0.06079972  | 0.08645756  | 0.4433989   | 0           | 1.0321090   | 0.1873754   | 0.0368665   |
| 0.09148977  | 0.156591617 | 0.1186151   | 0.07564359  | 0.03350046  | 0.05601657  | 0           |
| 0.3477217   | 1.2873      | 0.07453632  | 0.06381142  | 0.3969265   | 0.01713034  |             |
| 0.018531231 | 0.1046017   | 0.1196902   | 0.2811617   | 0.1542135   | 0.1238975   |             |
| 0.032810638 | 0.1388955   | 0.01770705  | 0.7436301   | 0.1542697   | 0.1251773   |             |
| 0.1797534   | 0.158292492 | 0.08525539  | 0.1274358   | 0.02278581  | 0.1018812   |             |
| 0.111631868 | 0.1125019   | 0.1081497   | 0.1557841   | 0.189587731 | 0.07488259  |             |
| 0.03775685  | 0           | 0.05015264  | 0.2614492   | 0.2148326   | 0.1839558   | 0.05411998  |
| 0.06803511  | 0.08402699  | 0.02876429  | 0.06340006  | 0.02157808  | 0.020586935 |             |
| 0.05246237  | 2.2239780   | 0.2701727   | 0.2921061   | 0.0463264   | 0.2522419   | 0           |
| 0.1130025   | 0.1493193   | 0.2176516   | 0.1258032   | 0.02234519  | 0           | 0           |
| 0.06174336  | 0.4564065   | 0.1745560   | 0.4360012   | 0.0418595   | 0.1204309   |             |
| 0.2094456   | 0.06040399  | 0.1513895   | 0.08179093  | 0.08297032  | 0.1254859   | 0           |
| 0.2923152   | 0.3685463   | 0.04278521  | 0.03012035  | 0.01848205  | 0           | 0.01834195  |
| 0           | 0.3028      | 0.02478957  | 0.08460557  | 0.4553708   | 0.1190798   | 0.1820737   |
| 0.09332429  | 0.1038018   | 0           | 0.07492192  | 0.1119571   | 0           | 0.4035885   |
| 0.07487962  | 0.03673132  | 0.1635670   | 0.021376513 | 0.112839572 | 0.07830173  |             |
| 0.269060407 | 0           | 0.02754833  | 3.8328230   | 0.8807770   | 0.1011049   | 0.05023186  |
| 0.1267312   | 0.03335874  | 0.1162769   | 0.08400811  | 0.2441744   | 0.040784298 |             |
| 0.9506928   | 0.2113223   | 0.05586662  | 0.2244865   | 0.1454023   | 0.07690124  |             |
| 0.1056136   | 0.02525326  | 0.1944768   | 0.285112    |             |             |             |
| FO680682.1  | 0           | 0.2646690   | 0.04964953  | 0.183461797 | 0           | 0.06659805  |
| 0           | 0           | 0           | 0           | 0.06926266  | 0           | 0.08248345  |
| 0.091108856 | 0.1488215   | 0.5853204   | 0.1401542   | 0.05827459  | 0.2221627   |             |
| 0.09092779  | 0.08922551  | 0.1441262   | 0.238162752 | 0.05417577  | 0.135669478 | 0           |
| 0.1695084   | 0.07236266  | 0           | 0.3504937   | 0.1719633   | 0.1107250   | 0.4264354   |
| 0.1127174   | 0           | 0.06176522  | 0.08353713  | 0.2313469   | 0           | 0.06812983  |
| 0.3512794   | 0.1050765   | 0           | 0.07274723  | 0           | 0.113904566 | 0           |
| 0           | 0           | 0.9106827   | 0.2507306   | 0           | 0.07425352  | 0.3408180   |
| 0           | 0           | 0.387051823 | 0           | 0.3033375   | 0.1054932   | 0.072068876 |
| 0.07388953  | 0           | 0           | 0           | 0           | 0.1062483   | 0           |
|             |             |             |             |             | 0.1822370   | 0.083353844 |

|             |             |             |             |             |             |             |             |
|-------------|-------------|-------------|-------------|-------------|-------------|-------------|-------------|
| 0.1221767   | 0.2936664   | 0.05390765  | 0           | 0.2454890   | 0.2135429   | 0           | 0.194904    |
| 0.07717406  | 0           | 0           | 0           | 0.1438777   | 0           | 0.1271364   | 0.3088742   |
| 0           | 0.06246612  | 0           | 0.05615259  | 0           | 8.0781960   | 0.115247307 | 0           |
| 0           | 0           | 0           | 0           | 0.1525537   | 0.3524885   | 0.1718627   | 0.5821101   |
| 0.1350069   | 0.5598745   | 0.1191547   | 0.1622991   | 0.4400466   | 0           | 0           | 0           |
| 0.1327671   | 0.1632654   | 0           | 0           | 0           | 0           | 0           | 0           |
| 0.178576402 | 0           | 0.04998794  | 0.1443950   | 0.05915817  | 0.110549972 | 0.05661806  | 0           |
| 0.3288020   | 0.1623477   | 0           | 0.1950902   | 0.1797448   | 0.07803159  | 0.04112565  | 0           |
| 0.06205576  | 0.1296010   | 0.08654164  | 8.8319090   | 0.06265219  | 0.06389398  | 0           | 0           |
| 0.1296245   | 0.2092332   | 0.459761643 | 0           | 0.06756114  | 0           | 0.1223496   | 0           |
| 0.1237443   | 0           | 0           | 0.2196738   | 0           | 0.058718081 | 0           | 0.07261312  |
| 0.3760034   | 0.04394949  | 0.2540013   | 0           | 0.04772122  | 0           | 0.09747894  | 0.316334129 |
| 0.08586861  | 0.9626742   | 0.09529249  | 0           | 0.08539279  | 0           | 0.1705010   | 0           |
| 0.1091762   | 0.06443808  | 0.05546996  | 0.08299697  | 0.1879648   | 0.06860602  | 0.1543680   | 0.06934136  |
| 0.1491037   | 0.178891792 | 0.06943334  | 0.2192261   | 0.1465103   | 0           | 0           | 0.1001649   |
| 0.054095172 | 0.2472351   | 0.1338344   | 0.0429322   | 0.09196884  | 0           | 0           | 0.16139     |
| 0.06745553  | 0.1795879   | 0.05678222  | 0           | 0           | 0.03281407  | 0.07387234  | 0.1839709   |
| 0.07193738  | 0.04627986  | 0           | 0.10112415  | 0.13351045  | 1.1317230   | 0.178817323 | 0.256045194 |
| 0.1830173   | 0.294883335 | 0.0602534   | 0.08467889  | 0.1846196   | 0.075161528 | 0           | 0.04855254  |
| 0.09910483  | 0.162526713 | 0.1022553   | 0.1059768   | 0.2324864   | 0.480798    | 0.0872173   | 0.1257361   |
| 0.1214039   | 0.09252788  | 0           | 0.1882338   | 0.2966585   | 0.062625126 | 0           | 0.959874917 |
| 0.04287832  | 0.0812507   | 0           | 0.0783114   | 0.2248065   | 0.05299599  | 0           | 0           |
| 0           | 0           | 0           | 0.110312584 | 0.1036460   | 0.07561389  | 0.2792790   | 0.1027174   |
| 0.05114302  | 0           | 0.06966911  | 0.1320954   | 0           | 0.07250495  | 0.06910425  | 0.1265216   |
| 0.5343242   | 0           | 0           | 0           | 0.1224352   | 0.05513179  | 0.1607981   | 0.07286113  |
| 0.0683419   | 0.06089675  | 0.2338216   | 0.06900378  | 0           | 0           | 0.377530576 | 0.2512903   |
| 0.2225710   | 0.06187428  | 0.4126052   | 0           | 0.4822778   | 0           | 0.8031565   | 0.1236112   |
| 0           | 0.1299119   | 0           | 0.2390283   | 0.09815542  | 0           | 0.04616327  | 0.1718417   |
| 0.056022839 | 0           | 0           | 0           | 0           | 0           | 0.1513113   | 0.1866035   |
| 1.0455720   | 0.2799973   | 0           | 0.3058591   | 0.04290032  | 0.23204324  | 0           | 0.09991529  |
| 0.2816507   | 0.1103441   | 0           | 0.123253876 | 0           | 0.1330338   | 0.2387575   | 0.1545380   |
| 0.08956782  | 0.2700990   | 0.226525405 | 0.2135091   | 0           | 0           | 0.04252434  | 0.046594171 |
| 0           | 0.09028147  | 0.07802754  | 0           | 0.125021368 | 0.03151876  | 0.08286292  | 0.1255996   |
| 0.3273798   | 0           | 0.3455169   | 0.2710705   | 0           | 0.3156492   | 0.2881431   | 0           |
| 0.1080780   | 0.10311369  | 0.1970766   | 0.03375     | 0           | 0.1828838   | 0           | 0.1148548   |
| 0.0602699   | 0.09433252  | 0           | 0           | 0           | 0.1290583   | 0.2302678   | 0.3092537   |
| 0.07374197  | 0.09714422  | 0.3230813   | 0           | 0.1747179   | 0.0754002   | 0.1049049   | 0.0756363   |
| 0.06318865  | 0.1365553   | 0.1558399   | 0.1571302   | 0.2219595   | 0.1045798   | 0           | 0           |
| 0           | 0           | 0           | 0.1388564   | 0.05363114  | 0.2756077   | 0           | 0           |
| 0.1862451   | 0.1589113   | 0.1629153   | 0.4175041   | 0.1139940   | 0.1402299   | 0.3249448   | 0           |
| 0           | 0           | 0.2243036   | 0           | 0.04211358  | 0.2378880   | 0           | 0           |
| 0.160602673 | 0           | 0.06536492  | 0.299475931 | 0           | 0.1379812   | 0           | 0           |
| 0.08440059  | 0.1886971   | 0.1586896   | 0.08354189  | 0.1164791   | 0.05259638  | 0           | 0.102138069 |
| 0           | 0.06615308  | 0.06995473  |             |             |             |             |             |



0.09369872 0.04551724 0.2407343 0.1322465 0.2529718 0.2783072  
0.2380065  
THUMPD3-AS1 1.5762130.8779417 1.4986250.968327445 0.887083583 2.105401  
1.1187851.3919970.8590657 1.07216 1.2782681.382946957 1.9580741.745457094  
0.757912624 2.4143141.9247342.3763121.1450173.5420643.386200387 2.168287  
3.3121630.7525887 2.6240282.11922 8.4411783.8999721.9097011.721888232  
1.8586392.657932637 1.6086691.9011951.4680682.468081444 1.71825726.57203  
4.3648592.8569192.5321091.6205714.9160353.4366071.14822 6.8907731.43961  
2.1725543.4908921.4327242.26499 2.0778172.5014651.468552051 1.93214  
2.5074986.4034560.9879813.5598932.0970343.6869291.0407820.9965008  
1.8371094.4297113.141672525 1.5814743.8223371.9140821.276808404 2.633716  
1.6177193.5554151.858343336 2.6967262.16935 1.1500522.6804673.061077  
2.1260742.5333311.9160240.8062763 1.8976750.586598523 0.6000773 1.17403  
1.9502112.1859284.39777410.079311.916796704 1.67435 2.8873865.156943  
3.072800756 3.9933141.2656661.7474752.9497671.79765927.268253.859737  
2.0400291.5841841.9295461.447323727 11.352842.22087529 1.9653832.740674  
2.1080371.1773263.6355133.2644551.0651565.2290833.7341461.2522254.479885  
2.1862561.1367422.1643152.9756597.0831871.4099783.6272272.3397882.18453722  
1.44104 1.6022830.9447227 1.9645231.160906835 1.8739451.4475556.315095  
3.76375 1.1713834.2528883.9381311.8447791.1689841.9788621.3467152.224396  
7.0732682.1873351.0292791.43066 2.5308881.7710012.1435142.182310841  
1.7295172.5444442.509702106 1.6581541.4763532.8009093.2792963.957455  
2.1092071.656130611 2.3102563.10599 3.0843664.2431041.5850292.409399  
1.5493051.5275790.6886829 1.560938788 2.488 1.43719611.054691.599653  
3.5845582.0794514.7995693.6190332.2149283.0822451.9365871.8754674.564324  
1.3654511.2702462.76275 2.76398511.075141.13108077 4.23737 3.480324  
2.0782282.1895622.4849331.3327131.796390755 7.0819563.2707331.295868  
1.6635732.3314364 1.1230564.9423936.3233514.3493896.2312943.101034  
1.1247731.7590175.2393442.2353562.3612082.2467672.4767282.01821241  
1.529253164 6.1807391.736879019 0.992455656 1.0733131.722600356 2.063835  
3.0215184.7808392.487696842 5.3612482.1435462.8606151.858632178 2.254425  
2.6219753.1635754.6097371.9708334.5729362.7967394.3978760.9596091.655858  
1.71025210.005748614 4.9649162.328652724 5.72154 10.797151.411726  
3.5607041.8127827.4066862.8720581.9774423.5586241.616321072 2.330672  
5.7785891.6717527.7228343.0649141.8819352.7042723.2681770.8388536  
7.0956642.4695821.1164650.7696822 2.6729762.595906707 3.3404253.056101  
4.2254233.0102553.2648171.83739 4.1315663.6689688.4450721.9893751.394559327  
2.183600755 3.6032032.3189062.43895 1.7213381.1418158.9922343.40638  
1.7957692.8430711.5903013.0848862.1761023.0110484.0411012.8368091.146238  
2.2994831.1022512.18997966 5.1413231.0866641.7458891.6505562.757784  
3.2009553.0563190.8672108 2.43962 3.1656428.0524761.347219013 1.447454  
2.6862492.96154 1.8806850.8870863 1.190406561 0.4611109 0.9849805  
11.102744.8345162.1076632.6532121.662660371 1.15920210.506872.054971  
1.8563661.15278805 5.5506921.7472163.19173 2.101387387 0.649563213

2.5941581.5125291.3845482.5307111.9966591.2284443.0961981.2302921.078866  
2.1584911.4338212.1956214.47866712 2.02619311.604382.6701253.142177  
1.4862252.0049263.9332962.9640332.3335222.5002123.1612192.0798442.303717  
2.5130383.22628 1.1615684.7534871.0879864.3823861.0086315.1114134.7295  
1.37646 3.8423732.90177311.641184.3022360.5938964 4.3928532.913823  
2.8866214.2011634.3057660.9347203 2.48003 1.7096 3.3261199.082677  
1.8434980.6628255.4861042.3064032.07652 5.6526424.62461 4.6662452.713091  
3.15151284 1.6068933.9433492.6703212.2404760.8958517 1.303888952  
1.339271753 1.1320372.350408809 2.5577673.5427642.4041423.3853811.257535  
1.1377462.0939442.0944721.8315521.5788972.2983982.507347169 2.69218  
4.5645631.1346041.4939532.4299681.9721032.19582 3.2754311.5530873.001841  
GAS5 33.5562118.2738919.7048217.632113649 24.550088735 42.95327  
40.9559336.2249412.6192325.8623649.3591523.517612738 33.82235  
50.689282451 21.944846088 45.8301 82.3621562.3682648.1565662.86093  
65.574664536 21.3801235.3878124.2187690.7730723.8899122.3417922.75011  
29.4287848.805244534 38.9203918.27894944 109.144918.6989136.94232  
29.12458907 56.6137627.3271838.6525137.7538161.8167 126.986836.22134  
57.2132818.8510737.9235154.6518239.7141 53.0191544.9373346.4009648.38808  
26.3671827.083704362 147.067257.69032101.296721.2037655.9076197.32001  
39.9919721.5719123.2254419.5711544.9733411.804568956 39.9778855.25156  
66.7256 28.826086919 73.5766482.3722826.7576 39.764215547 59.94985  
54.0658340.6255446.6161427.93068141.702436.0020489.5645615.32076182.87  
23.862591601 21.7855448.7221915.81175148.040391.3647 56.62378  
34.327328079 56.8065215.3436824.3299656.35131745 56.3350353.21951  
142.158468.8553451.23694165.153550.2317354.7940245.6461246.1720958.47573093  
20.0371227.342748847 31.4290551.7998425.1341893.7182936.7374318.39429  
39.1950593.5461533.3871 15.4877 202.951 33.7164 36.1230373.7213651.49825  
81.7198132.0841 75.2732749.6685235.801347227 170.602240.3052 25.87994  
13.7881246.395822852 23.9444823.5522481.6331848.3383427.8624864.80368  
45.9453927.5585262.2630634.5755322.4054356.4739627.2728734.03872123.1906  
42.7095 74.8194539.4983592.0988976.331068861 39.0408468.44291  
27.508626495 75.65593118.257864.8708521.6842 33.5975175.93704  
48.471282736 23.6599327.4111 41.1135 24.5165246.6751136.1884562.9103  
77.1189412.8463620.844206255 105.297799.5389829.693358.28238139.08325  
27.6157733.8475721.9160915.7312530.6068431.6914424.9958973.8430857.78097  
19.55151138.0047101.370363.4261533.343291739 60.734 63.0153623.01091  
64.4407837.8297859.1064963.204867751 45.1616 84.6333320.1757748.28858  
59.771339879 17.0334844.7920733.918 28.3809863.7115818.8510429.5073  
55.3509 36.6601982.8902765.5011643.7706 112.975431.544134171  
21.070640572 80.5495331.885231581 21.092525006 70.23586  
54.481746692 34.5846461.5582429.6980357.388962423 146.921547.05492  
95.4499417.35736952 52.1447382.1461465.0156 40.8547427.9436429.37129  
36.3705131.7990461.4979425.5532833.8405759.116583911 24.9453324.9268261  
63.4987798.9246921.19393116.083434.5676431.4311165.8043367.60134116.9259

40.148873968 49.5696123.5650588.0489 129.213733.04852182.602164.6737  
65.2404221.773 60.5755814.0905321.6025726.1358299.6647774.42214607 24.6762  
45.0321321.9853865.0013275.6328 27.539 65.5335321.1679723.0523231.00138  
46.753647112 58.168613593 93.08448103.993424.2134270.5890818.77206  
17.2855412.8611843.29927120.931157.32706108.497945.5273 43.2874971.8245  
38.6355574.0703449.5597986.9388238.155395396 44.5609830.5930918.25067  
173.552839.3135338.0193619.6869 158.985423.4947 112.125655.96188  
22.007936883 43.6136327.8063647.2132430.9183832.4002 48.823097332  
27.9165 35.1272 43.6016849.8283 31.5476817.9131244.477991834 46.7099  
69.55599231.645534.9459132.296073862 123.195345.5497533.38433  
30.781821114 23.745968536 55.4929 50.5146626.7915489.0939360.94099  
38.8808924.4100652.5765417.8649125.5641727.7810665.1776723.479379081  
35.7277 125.364829.4867 52.2475 42.7047 23.6265332.2290452.5188 85.87765  
40.27075121.431366.7078436.5708553.0454734.7904 30.8080423.1538924.99554  
147.583 23.3009538.8225991.3377327.74744263.15 23.2249318.3312524.97746  
76.0277 28.9455239.5093476.5187664.0959746.88517120.565972.0227232.61586  
62.7489 77.4381728.9346948.4273637.7991 23.5198649.2631452.61045128.148  
262.775 33.3856271.473707382 30.18277109.081943.14848183.178225.60564  
31.002596681 33.079552987 34.6616843.656699803 69.68287152.25  
11.1469644.9499613.5326321.8973835.7346558.5011866.6001 14.3876772.47901  
23.087394876 72.8573786.3759667.6174862.4531328.6779332.0868127.15388  
130.288 48.84757114.0526

AC073529.1 0.05288031 0.00988212 0.08342089 0.041100208 0.076149809  
0.02237954 0.03143922 0.03771233 0.1699230.05429554 0.08223992  
0.131047903 0.06347655 0.04824147 0.035294261 0.02327495 0.05288887  
0.09239218 0.0640582 0.02795241 0.132669877 0.2083742 0.2067771  
0.04709726 0.1305502 0.06843406 0.5347174 0.1099386 0.02421601  
0.21341857 0.09102585 0.055721393 0.07333257 0.4810076 0.09726669  
0.094182804 0.1112362 0.04815531 0.1860396 0.2155744 0.08757156  
0.05050324 0.05736325 0.05534805 0.05614346 0.05182771 0.05431429  
0.2060485 0.1426360.07061957 0.0134535 0.2240875 0.06863742  
0.140346697 0.02275388 0.1910955 0.1293106 0.07436641 0.07226893  
0.07796288 0.1298287 0.02106381 0.2586752 0.06653887 0.03817605  
0.1843808 0.03221997 0.1304239 0.07756952 0.130064492 0.1478173  
0.08494434 0.08862456 0.121089751 0.1114883 0.0662127 0.3002026  
0.0740198 0.08116852 0.07326057 0.1174680.07140711 0.03056106  
0.1592207 0.289438103 0.06842687 0.09868334 0.1207671 0.1261817  
0.2016517 0.2690952 0.162061614 0.3493085 0.2204347 0.1230422  
0.105709183 0.2673714 0.05640662 0.1504308 0.04984325 0.1383917  
0.07785795 0.2103970.1399403 0.0547037 0.04402874 0.100583583 1.52398  
0.096818963 0.1479105 0.06904085 0.08543999 0.1579332 1.073235  
0.1304078 0.09829644 0.1254264 0.1334687 0.1939158 0.09036671  
0.3504528 0.1241980.07435817 0.1325869 0.1045082 0.1255379  
0.06073879 0.1492122 0.080011505 0.05664088 0.06719158 0.102436

|             |             |             |             |             |                     |
|-------------|-------------|-------------|-------------|-------------|---------------------|
| 0.1259032   | 0.061915163 | 0.05073566  | 0.03351315  | 0.06138349  | 0.1636654           |
| 0.1518684   | 0.0655579   | 0.1006688   | 0.3321410   | 0.05527928  | 0.13207 0.3266325   |
| 0.1114786   | 0.5386126   | 0.02807144  | 0.04294173  | 0.0607237   | 0.1134874           |
| 0.1161570   | 0.06249821  | 0.24032995  | 0.2618162   | 0.1135159   | 0.103726588         |
| 0.3837329   | 0.1108878   | 0.1245299   | 0.1105445   | 0.1558401   | 0.07333051          |
| 0.078926252 | 0.1408717   | 0.1138706   | 0.1263518   | 0.2806061   | 0.02133859          |
| 0.09804448  | 0.2111432   | 0.06750963  | 0.1091891   | 0.097442209 | 0.0288552           |
| 0.05806339  | 0.16011     | 0.1694698   | 0.06695571  | 0.1416287   | 0.1400544           |
| 0.02623912  | 0.06114576  | 0.08661482  | 0.0994137   | 0.1208576   | 0.168436            |
| 0.06147812  | 0.0288187   | 0.1020020   | 0.1553427   | 0.1252616   | 0.180343835         |
| 0.1244390   | 0.3315083   | 0.03282211  | 0.02437638  | 0.1189462   | 0.2131757           |
| 0.042415533 | 0.1523145   | 0.07495598  | 0.05770757  | 0.1648273   | 0.140115728         |
| 0.07904151  | 0.1265445   | 0.1284502   | 0.2162489   | 0.2416932   | 0.1687976           |
| 0.1376302   | 0.02940481  | 0.1489439   | 0.02060713  | 0.1369847   | 0.191806            |
| 0.06591202  | 0.067963308 | 0.094714394 | 0.07394779  | 0.08011945  | 0.078871064         |
| 0.1571691   | 0.066061526 | 0.08098995  | 0.04742568  | 0.2223078   | 0.084190672         |
| 0.07788001  | 0.1631555   | 0.02775257  | 0.081922962 | 0.1030853   | 0.07122464          |
| 0.2343735   | 0.2112797   | 0.3907788   | 0.1830930   | 0.2039822   | 0.1399184 0         |
| 0.1950328   | 0.1376655   | 0.119252066 | 0.1640938   | 0.302395659 | 0.1008615           |
| 0.0546068   | 0.1663088   | 0.1491222   | 0.1846625   | 0.02374496  | 0 0.06135101        |
| 0.2203915   | 0.12356442  | 0.05804849  | 0.0677579   | 0.1525040   | 0.1208097           |
| 0.1260310   | 0.0545138   | 0.03901923  | 0.1109730   | 0.08872004  | 0.2517664 0.1780332 |
| 0.04251617  | 0.09576199  | 0.2139650   | 0.046596815 | 0.04203855  | 0.1234290 0.4322833 |
| 0.1576004   | 0.1713892   | 0.1224829   | 0.1159609   | 0.2671487   | 0.5410523           |
| 0.2494171   | 0.095159415 | 0.135322648 | 0.3602916   | 0.1495851   | 0.06041294          |
| 0.2079217   | 0.1694628   | 0.03308093  | 0.1368541   | 0.06995388  | 0.5397838           |
| 0.4153819   | 0.2558326   | 0.2764845   | 0.2537393   | 0.08032281  | 0.3958086           |
| 0.02252676  | 0.04136709  | 0.1283233   | 0.100404569 | 0.1131311   | 0.1343902           |
| 0.1362642   | 0.03928435  | 0.1779627   | 0.05573869  | 0.6831861   | 0.3345423           |
| 0.0358007   | 0.08565048  | 0.1922157   | 0.08317394  | 0.08069273  | 0.06715086          |
| 0.1340813   | 0.08033981  | 0.1112181   | 0.220896557 | 0.07792579  | 0.1887526           |
| 0.06953424  | 0.1644475   | 0.06521294  | 0.1008487   | 0.101495149 | 0.119579            |
| 0.1072447   | 0.08309423  | 0.07621246  | 0.130478806 | 0.1157162   | 0.06067618          |
| 0.03496039  | 0.168412997 | 0.063018076 | 0.04942715  | 0.1670710   | 0.03517198          |
| 0.07334158  | 0.07533092  | 0.09030556  | 0.07590855  | 0.1526814   | 0.1060704           |
| 0.1613789   | 0.1333871   | 0.3813436   | 0.109725688 | 0.1398088   | 1.845613            |
| 0.06736775  | 0.2304604   | 0.2404160   | 0.09648923  | 0.1485223   | 0.0792485           |
| 0.1047174   | 0.08722218  | 0.04117195  | 0.06268262  | 0.3373115   | 0.2192404           |
| 0.02598032  | 0.06608047  | 0.07072919  | 0.09952059  | 0.07913972  | 0.2074492           |
| 0.0168916   | 0.08813038  | 0.04236124  | 0.1557149   | 0.1147197   | 0.06400568          |
| 0.1848065   | 0.04143724  | 0.1640002   | 0.04353028  | 0.04800834  | 0.08449345          |
| 0.2021984   | 0.1441772   | 0.0771791   | 0           | 0.07550338  | 0.2851123 0.1008674 |
| 0.03649725  | 0.2538720   | 0.08299725  | 0.09948127  | 0.2256678   | 0.09688322          |
| 0.0980796   | 0.2009993   | 0.267100945 | 0.1651044   | 0.01332327  | 0.1680415           |

|             |             |             |             |             |             |
|-------------|-------------|-------------|-------------|-------------|-------------|
| 0.01030385  | 0.02039276  | 0.053968755 | 0.044315177 | 0.08053892  | 0.109021879 |
| 0.1059871   | 0.2627467   | 0           | 0.1340068   | 0.1039936   | 0.1902287   |
| 0.07486222  | 0.03914151  | 0.02945739  | 0.09340318  | 0.137289482 | 0.05333757  |
| 0.07410004  | 0.1567168   | 0.04198189  | 0.01529557  | 0.2534745   | 0.2617022   |
| 0.1912689   | 0.07793505  | 0.1119712   |             |             |             |
| OSMR-AS1    | 0.2357364   | 0.3230607   | 0.2337556   | 0.575839151 | 0.165963091 |
| 0.3135511   | 0.3120086   | 0.2641864   | 0.1785544   | 1.1898350   | 0.3200644   |
| 0.095628208 | 0.1824298   | 0.257482901 | 0.185435353 | 0.1268153   | 0.08821495  |
| 1.1218750   | 0.1994433   | 0           | 0.166814168 | 0.09731502  | 0.0471069   |
| 0.03048481  | 0.02905464  | 0.08324132  | 0.03500698  | 0.03769791  | 0.342618516 |
| 0.3542578   | 0.201087058 | 0.05268894  | 0.7241697   | 0.1324911   | 0.024436276 |
| 0.07639647  | 0.1574266   | 0.20273     | 1.5876091   | 0.3012910   | 0.1326715   |
| 0.1938650   | 0.3496020   | 0.01512788  | 0.3945805   | 0.1603814   | 0.05742579  |
| 0.03141529  | 0.02854184  | 0.1001721   | 0.119172328 | 0.3719284   | 0.1338683   |
| 0.03355039  | 0.3820370   | 0.06026977  | 0.9648720   | 0.6496358   | 0.1311631   |
| 0.4467033   | 0.1604610   | 0.266529738 | 0.2821385   | 0.02537942  | 0.1975994   |
| 0.219348929 | 0.06903373  | 0           | 0.2069474   | 0.452411138 | 0.4790192   |
| 1.1113470   | 0.2304584   | 0.06317894  | 0.04276773  | 0.2400124   | 0.1111619   |
| 0.3032936   | 0.2859973   | 0.130813083 | 0.2023927   | 0.5157370   | 0.4653060   |
| 0.2568421   | 0.01396366  | 0.073244604 | 0.1401935   | 1.0193820   | 0.1117340   |
| 0.02229784  | 0.7150255   | 0.04683618  | 0           | 0.5770693   | 0.2657169   |
| 0           | 0.07664324  | 0.01468737  | 0.655171943 | 0.4077618   | 0.331587209 |
| 0.2216740   | 0.05320297  | 0           | 0.37086     | 0           | 0.01765633  |
| 0.1132033   | 0.1150994   | 0.4223706   | 0.1364777   | 0           | 0           |
| 0.1103132   | 0.1100292   | 0.093417526 | 0.1102185   | 0.0784496   | 0.2140198   |
| 0.1083146   | 0.318072133 | 0.6664104   | 0.07825664  | 0           | 0.6086499   |
| 0.02551407  | 0           | 0           | 0.05378449  | 0.3570911   | 0.1694934   |
| 4.9281920   | 0           | 0.1417961   | 0.1152194   | 0.3220958   | 0.0547274   |
| 0           | 0.1060285   | 0.056991106 | 0.9280575   | 0.06473357  | 0.01710529  |
| 0.09576381  | 0.5479496   | 0.030716813 | 0.07739997  | 0           | 0.09834812  |
| 0           | 0.4426249   | 0.4181486   | 0.09458514  | 0.4589418   | 0.206852302 |
| 0.1549531   | 0.7103589   | 0.2283054   | 0.02233549  | 0.02875804  | 0.3419068   |
| 0.08169471  | 0.1856161   | 0.1853999   | 0.1450882   | 0.2677423   | 0.1311051   |
| 0.1256130   | 0.3499320   | 0.02165319  | 0.1269594   | 0.01949991  | 0.421121314 |
| 0.01433529  | 0.1724467   | 0.08538201  | 0.3124704   | 0.5239864   | 0.396178441 |
| 1.3095120   | 0.05614712  | 0.2405553   | 0.19631074  | 0.5439958   | 0.1688539   |
| 0.3352320   | 0.2818399   | 0           | 0           | 0.1606903   | 0.05149744  |
| 0.1881607   | 0.08473529  | 0           | 0.185151495 | 0.128044518 | 0.3206834   |
| 0.334858196 | 0.01595678  | 0.077130213 | 0           | 0.3986777   | 0.1327959   |
| 0.1136611   | 0.5968760   | 0.05184407  | 0.255064667 | 0.1872226   | 0.05543894  |
| 0.3344526   | 0.6384656   | 1.2090740   | 0.1644388   | 0.6033377   | 0.03630264  |
| 0.4818860   | 0.08867947  | 0.0819017   | 0           | 0.109841638 | 0.1794453   |
| 0.7081640   | 0.04096654  | 0.03920053  | 0.08317036  | 0.04097003  | 0.4934542   |
| 0.302962346 | 0.01355492  | 0.01977771  | 0.7122250   | 0.1612017   | 0.1070165   |

|             |             |             |             |             |             |             |
|-------------|-------------|-------------|-------------|-------------|-------------|-------------|
| 0.07071962  | 0.2004506   | 0           | 0.2616889   | 0.01896452  | 0.03615006  | 0.2647456   |
| 0.3354211   | 0.1128197   | 0.231217706 | 0.01090715  | 0.03202438  | 0.1297833   |             |
| 0.01051466  | 0           | 0           | 0.5097044   | 0           | 0.01820045  | 0.222206973 |
| 1.046724274 |             |             |             |             |             |             |
| 0.03943677  | 0.05821608  | 0.4055774   | 0.5340703   | 0.5575957   | 0.1699442   |             |
| 0.6980047   | 0.1796844   | 0.1131173   | 0           | 0.2986976   | 0.4077598   | 0.08132453  |
| 0.1563016   | 0           | 0.0175341   | 0.0241491   | 0.4344897   | 0.380989286 | 0.06215829  |
| 0.3468480   | 0.1645815   | 0.2751989   | 0.6926019   | 0.1301556   | 0.02279013  |             |
| 0.0976488   | 0.01393305  | 0.06000079  | 0.06732651  | 0.279190767 | 0.4796293   |             |
| 0.1568041   | 0.1473381   | 0.8802848   | 0.03246321  | 0.752231769 | 0.4549117   |             |
| 0.3827623   | 0.02497993  | 0.5456868   | 0.2342752   | 0           | 0.325877146 | 0.1954604   |
| 0.1168661   | 0.2089592   | 0.1223502   | 0.536239206 | 0           | 0.3542127   | 0.3877714   |
| 0.186281804 | 0.277956909 | 0.4451816   | 0.6177026   | 0.1971124   | 0           | 0.1407243   |
| 0.5422442   | 0.1063525   | 0.3713820   | 0.2889662   | 0.03768362  | 0.09344178  |             |
| 0.05653817  | 0.040455902 | 0.4467455   | 1.1532990   | 0.3932765   | 0.04783542  |             |
| 0.6979516   | 0.1802498   | 0           | 0.5921708   | 0.04890519  | 0.04073454  | 0.1648127   |
| 0.0439111   | 0           | 0.06022926  | 0.3033335   | 0.1832368   | 0.1143415   | 0.4436551   |
| 0.1343995   | 0.4752751   | 0.3944362   | 0.02743913  | 0.3363206   | 0           | 0.9643764   |
| 0.2989196   | 0           | 0.5031531   | 0.5744359   | 0.1524715   | 0           | 0           |
| 0.02421302  |             |             |             |             |             |             |
| 0.08416714  | 0.3604422   | 0.5269421   | 0.02203852  | 0.0162382   | 0.1939706   |             |
| 0.3835117   | 0.03120089  | 0.7305036   | 0.3301090   | 0.9349246   | 0.05655806  |             |
| 0.06543597  | 0.1466731   | 0.023988771 | 0.2974132   | 0.07777801  | 0           | 0.09624217  |
| 0.1666672   | 0.084015045 | 0.399138975 | 0.4787150   | 0.254577246 | 0.02062423  | 0           |
| 0           |             |             |             |             |             |             |
| 0.02933622  | 0.08830388  | 0.6745313   | 0.4704141   | 0.1311082   | 0.03808309  |             |
| 0.3852017   | 0.05816159  | 1.309055387 | 0.1660649   | 0.2249405   | 0.4574371   |             |
| 0.1960640   | 0.1309613   | 0.1889007   | 0           | 0.4962582   | 0.1637877   | 0.09960545  |
| AL162724.2  | 0.09614603  | 0.9882120   | 0.2224557   | 0.924754675 | 0.152299617 | 0.5967877   |
| 1.3361670   | 0.3771233   | 0.1699231   | 0.1276770   | 0.09137769  | 0.08190494  | 0.2929687   |
| 0.482414696 | 0.617649573 | 0.1551664   | 0.3777777   | 0.8315296   | 0.2669092   | 0           |
| 0           | 0.1666994   | 0.05043345  | 0.05233028  | 0.1958253   | 0.06221278  | 0.1527764   |
| 0.3997766   | 0.3228802   | 1.06709285  | 0.4247873   | 0.709181363 | 0.5640967   |             |
| 0.3164524   | 0           | 0           | 0           | 0.1926213   | 0.3720792   | 2.6532230   |
| 0.7961051   |             |             |             |             |             |             |
| 0.4419034   | 0.2294530   | 0.4151104   | 0.09357244  | 0.06478464  | 0.3017461   |             |
| 0.2289428   | 0.2459241   | 0           | 0.1345350   | 0.4074317   | 0.1715935   | 0.191381859 |
| 0.1516925   | 0.1273970   | 0.1436784   | 0.3966209   | 0.1032413   | 0.7796288   |             |
| 0.1854696   | 0.07021272  | 0.1567729   | 0.1663472   | 0.1527042   | 0.175600762 |             |
| 1.5304490   | 0.05434327  | 0.4231065   | 0.361290257 | 0           | 0           | 0.1772491   |
| 0.403632502 |             |             |             |             |             |             |
| 0.5351437   | 0.3310635   | 1.6108430   | 0.2705617   | 0           | 0.07341752  | 0.1190119   |
| 0.4584159   | 0.04082581  | 0           | 0.09123583  | 0.2349603   | 0.3623014   | 0.1484491   |
| 0.7791087   | 0.2391957   | 0.15683382  | 0.05457945  | 0.4754473   | 0.06835676  | 0           |
| 0.3819591   | 0.7252279   | 0.2005744   | 0.1424093   | 0.6919585   | 0.5390166   | 0           |
| 0.2798807   | 0           | 0.1886946   | 0.529387278 | 3.3337050   | 0.258183901 | 0.1056504   |
| 0           |             |             |             |             |             |             |
| 0.22784     | 0.09870823  | 0.3850172   | 0.09314842  | 0.3024506   | 0.07839152  |             |
| 0.3336717   | 0.1817961   | 0.08215155  | 0           | 0           | 0.1487163   | 0.09143924  |
| 0.5225411   | 0.0738458   | 0.7423629   | 0.3141310   | 0.500071905 | 0.09440147  |             |

0.3359579 0.2156548 0.1987945 0.495321302 0.2536783 0.1675658  
0.3683010.6667851 0.1446366 0.3277895 0.2013376 0.08740552  
0.04606607 0 0.2177550 17.147670 0 0 0.04934233 0.2177944  
2.81242 0.085832125 0 0.07567725 0.549140759 1.09638 0.9702679 0  
0.1381806 0 1.6132710.328859383 0 0 0.4211726 0.2461457  
0.1422572 0.3268149 0.2939968 0.2025289 0.3275672 0 0.096184  
0.3317908 0.2668499 0.1303614 0.04782551 0.8620875 0.4456276  
0.08746374 0 0.2887161 0.3106678 0.5887934 0.8421798 0.230543  
0.1729122 0.2781872 2.6408250.3340310.267176052 0.07777436 0.1227809  
0.1641105 0.06094095 0.5203895 0.6170876 0.181780855 1.938548  
0.8245158 0.1923586 0 0.280231456 0.2496048 0.3615556 0.3022358  
0 0.4452242 0.2893674 0.06881512 0.1102681 0.08274662 0.4121426  
0.4834753 0 0 0.226544361 0.099699362 0.8451176 0.200298625  
0.215102903 0.6150095 0 0.06749163 1.1382160 0.673525378 0.09735002  
0.2175406 0 0.273076539 0.2290785 0 1.3671790.6628384 0.2930841  
0.5633629 1.3598810.4145730.3258413 0 0.2373543 0.561186194  
0.2344197 0.806388425 0.5763515 0.3185397 0.3424004 0.2631568  
0.33575 0.2968120 1.4315240.07599706 0.6178221 0.05804849 0  
0.3519324 0.2301136 0.1718605 0.1211418 0.6243076 0 0.1400843  
0 0 0.7086029 0.2394050.06902098 0.116492038 0.0934190.4114301  
0.1235095 0.3602294 0.1632278 0 0.1364245 0 0.2318796 0  
0.339855053 0.33830662 0.3377733 0.1246542 0.3775809 0.2079217 0  
0 0.5402137 0 0.6228274 0.5538426 0.5116652 0.6790848  
0.5970337 0.2677427 0 0.4505352 0.2585443 0.2566466 0.125505711  
0.1330954 0.07073167 0.2349383 0 0 0.3483668 0.6831861 0 0  
0.1713010.6727550.051983713 1.0269980.2238362 0.4732281 0.1235997  
0.06951132 0.138060348 0.4329210.1490152 0.3209273 0.2596540.3009828  
0.1008487 0.697779148 0.5978949 0.3574823 1.4701290.4286951  
0.41753218 0 0.3033809 0.6118068 0.886384196 0.420120507 0.07061022  
0.5104948 0.6330956 0.07334158 0 0.3870238 0.07590855 0.1272345  
0.4714241 0.08068944 0.2667743 0.06053072 0.115500724 0.5886687  
4.8089920.4210484 0.1024268 0.2599092 0.2573046 0 0.4754910  
0.1744444 0.1176342 0.1253652 0 0 0.6062075 0.04130029  
0.1632212 0.4523663 0.2877808 0.0782827 0.3378321 0.1175072  
0.7625023 0.07077949 1.6825560.2909349 0 1.3259920.5857150 0  
0.2534804 0.05184574 0.2402954 0.2058109 2.2566130 0.06953958 0  
0.3649725 0 0.7661285 0.1570757 1.2375330 0 0.06281229  
0.410924531 0.2830361 0.1998491 0.2100519 0.1030385 0.3568734  
0.239861135 0.569766567 0.8786064 1.006355809 0.5299357 0.3863922  
4.7785850.1675086 0.09453962 0.2818203 0.8887646 0.09357777  
0.09785377 0.05891478 0.06226878 0.114407902 0.1777919 0 1.332092  
0.7346832 0.1529557 0.5393074 0.09875554 0.7792435 0.1558701  
0.2132786  
AL162727.2 0.03748478 0.07705552 0 0.160238785 0.039585048 0 0.06128658

|             |             |             |             |             |             |             |            |   |   |   |
|-------------|-------------|-------------|-------------|-------------|-------------|-------------|------------|---|---|---|
| 0           | 0           | 0           | 0.07125147  | 0.127730235 | 0.07614714  | 0.053737333 | 0          | 0 | 0 | 0 |
| 0.04162431  | 0.07265268  | 0.159152179 | 0.1299833   | 0.07865064  | 0.08160875  |             |            |   |   |   |
| 0.2544903   | 0.1940409   | 0.07941794  | 0.4286213   | 0.0629412   | 0.052003892 |             |            |   |   |   |
| 0.09463616  | 0.157994835 | 0.04398526  | 0.1480516   | 0.1264057   | 0.081598604 | 0           |            |   |   |   |
| 0           | 0.09670918  | 0.1293026   | 0.06207604  | 0           | 0.08945762  | 0.1618405   |            |   |   |   |
| 0.2188884   | 0.2020625   | 0           | 0           | 0           | 0.0524516   | 0.09530808  | 0.06689976 |   |   |   |
| 0.099486266 | 0.05914088  | 0           | 0.1680492   | 0.03865798  | 0.2012553   | 0.3039566   |            |   |   |   |
| 0.1446193   | 0.05474814  | 0.1833647   | 0.1945630   | 0.0595353   | 0.136924138 | 0           |            |   |   |   |
| 0.1694960   | 0.6048459   | 0           | 0.2305202   | 0           | 0           | 0.1888387   | 0.03477305 |   |   |   |
| 0.06453643  | 0.1141863   | 0.2565187   | 0.1054848   | 0           | 0.1144942   | 0.1855982   |            |   |   |   |
| 0           | 0           | 0.072802724 | 0.07114085  | 0           | 0.2825034   | 0           | 0.07147147 | 0 |   |   |
| 0.040763558 | 0           | 0.03370259  | 0.2132039   | 0           | 0.1489157   | 0           | 0.07819864 |   |   |   |
| 0.05552159  | 0           | 0.4669961   | 0.2050705   | 0.2727951   | 0.08531007  | 0.04904467  |            |   |   |   |
| 0           | 3.7134950   | 0.10065904  | 0.08238053  | 0.1345860   | 0.04441437  | 0.07696743  |            |   |   |   |
| 0.1501080   | 0           | 0.2445022   | 0.05203589  | 0.09450329  | 0.06405741  | 0.08814982  |            |   |   |   |
| 0.05696647  | 0.1159611   | 0.1782486   | 0.2376790   | 0.0526232   | 0.2449427   | 0           |            |   |   |   |
| 0.03680462  | 0.1746414   | 0.1681562   | 0           | 0           | 0.04945122  | 0.1959883   |            |   |   |   |
| 0.09572717  | 0.1417973   | 0           | 0.4259880   | 0.1177442   | 0           | 0.2155192   | 0.2168024  |   |   |   |
| 0.2263917   | 0.1133805   | 1.5427890   | 0.1641646   | 0.1116123   | 0.2367456   |             |            |   |   |   |
| 0.1538981   | 0.05660817  | 0           | 0           | 0.08506263  | 0.2950455   | 0.142730256 |            |   |   |   |
| 0.1068623   | 0           | 0           | 0.2558227   | 0.1143585   | 0.051285413 | 0.06461428  |            |   |   |   |
| 0.1268432   | 0           | 0.3454764   | 0.05546232  | 0.1528997   | 0.1667222   | 0           |            |   |   |   |
| 0.04256992  | 0.069072959 | 0           | 0           | 0.04161508  | 0           | 0.1864589   | 0.048015   |   |   |   |
| 0.2978372   | 0.4091974   | 0.2383911   | 0.05628136  | 0.04844845  | 0.1208184   |             |            |   |   |   |
| 0.1641718   | 0           | 0.1797703   | 0.4338312   | 0.06056397  | 0.1302298   | 0.05208242  |            |   |   |   |
| 0.1212886   | 0           | 0.2559294   | 0.2851111   | 0           | 0           | 0           | 0.1079698  | 0 |   |   |
| 0.1874887   | 0           | 0           | 0.03243809  | 0.07048046  | 0.1767506   | 0.2744966   |            |   |   |   |
| 0.2975676   | 0.1128166   | 0.05365837  | 0.02866039  | 0.06452141  | 0.08034172  |             |            |   |   |   |
| 0.06283138  | 0.04042165  | 0           | 0.176647249 | 0.116610393 | 0.1647444   | 0.104121479 |            |   |   |   |
| 0.055908603 | 0.05328352  | 0.064389083 | 0.3157583   | 0           | 0.04031251  | 0.13129482  |            |   |   |   |
| 0.2277251   | 0.12722     | 0.2163998   | 0.212930567 | 0.1786232   | 0.09256198  |             |            |   |   |   |
| 0.05076444  | 0.1938173   | 0           | 0.05491006  | 0           | 0.1616310   | 0.08469123  | 0.04110168 |   |   |   |
| 0.1480610   | 0.164093685 | 0.2741820   | 0.2996055   | 0.1419316   | 0.03814081  |             |            |   |   |   |
| 0.1367971   | 0.1309      | 0.09257528  | 0.1368088   | 0.05315362  | 0           | 0.192697931 |            |   |   |   |
| 0.1357894   | 0.06604251  | 0.06098181  | 0.0448576   | 0.1786769   | 0.04722996  |             |            |   |   |   |
| 0.06085024  | 0.4038106   | 0.1092303   | 0.8865795   | 0.06035687  | 0.05525308  |             |            |   |   |   |
| 0.09333764  | 0.05381889  | 0.090834298 | 0.1456863   | 0           | 0.09630616  | 0.1053329   |            |   |   |   |
| 0.0636382   | 0           | 0           | 0.1205382   | 0.1215514   | 0.265000902 | 0.065948379 |            |   |   |   |
| 0.2194814   | 0.09719874  | 0.05888349  | 0.4863788   | 0.06006278  | 0           | 0.08424599  |            |   |   |   |
| 0           | 0.1079217   | 0           | 0.06649488  | 0.03782245  | 0           | 0.2087715   | 0.1714614  |   |   |   |
| 0.1171011   | 0.1612793   | 0.05002985  | 0.097862681 | 0.4670133   | 0.1103056   |             |            |   |   |   |
| 0.3663847   | 0.1225274   | 0.06607898  | 0           | 0.7610174   | 0.4075910   | 0.1395774   |            |   |   |   |
| 0.1335714   | 0.1498796   | 0.040534136 | 0           | 0.2618034   | 0.1229994   | 0.09637648  |            |   |   |   |
| 0           | 0.10765212  | 0.2025413   | 0.03873137  | 0.2919490   | 0.1173452   | 0           | 0          |   |   |   |



[illegible]

1.2898230.06669583 0.4104607 4.9699740 0.3097430 0.4411114  
0.431425883 0.7320248 0.2917681 2.0028490 0.6991392 0.4790044 0  
0 0 0 0 0.071477605 19.769720 0.2168962 1.2746220 0.822609576  
1.1310060.06829863 0 0.2380162 0.4828265 0 1.046668723 1.397579  
0.1966153 0 0.1309902 0 0 0 8.4123440 0.962776162 0 0 0  
0.1008447 0 0 0 0 0.9723123 0 0 0.08322974 0.317626991 0  
2.6806881.0420950.7041844 1.1614692.0343150 0 0.1439865 0  
0.1617470 0 0.7093071 0.2381529 0 0.5236681 0 0 0  
1.3935570.1615724 0 0 0 0.5600497 0 0 0 0 0 0 0  
0.07074751 44.519040 0 0 0.1254593 0 0 0.1439861 0.6005677  
0 0.09632818 0.6909352 0.141255308 0.4540371 0.2747925 0 0  
2.8741050.247356795 0.34819068 0.5033682 0 0 0 0 0.05758107  
0.5849639 0.1937515 0.8147009 4.3747610 1.7821720 0 0 0 0  
0 0.8412562 0.2224643 0.06789443 0 5.4651960  
AC009065.5 0.7554331 0.3726971 0.4544452 0.419809265 0.255283168  
0.3985690.6669606 0.5689174 0.3738306 0.2100223 0.6318115  
0.283157077 0.5371093 0.953015155 0.499161696 0.5364323 1.021079  
3.9491060.4026515 1.4495320.930147047 0.8906509 0.6974225 0.6743131  
0.5744211.58376 1.8085811.4763180.5581214 0.733626335 0.8582438  
1.846766162 1.1878260.8752168 1.2227810.559116966 0.9459754 2.028027  
2.2218441.2508051.1759610.2976084 0.8293087 1.2394010.3529018  
3.0541331.6311530.4796896 0.8656528 0.9987624 1.0993430.6914699  
0.8359057 1.042575463 1.3587311.3012692.3481160.2493045 0.5191564  
1.02911 2.2150370.6178719 0.8868865 1.1501722.2076661.79363635  
1.6708361.5883761.1081361.158193338 0.5110257 1.3882333.1010160.380567788  
0.8829871 0.9624488 1.0585540.9822314.7406282.7054082.5612231.234323  
0.3841962 0.1411407 0.850974699 0.6308306 0.4282991 0.7780854  
1.9595281.20991 0.8081399 0.920091743 0.7547558 0.7742999 4.490063  
2.067201795 0.7202658 0.6837863 0.3467072 3.8938770.5747492  
0.9223172 3.6644141.0995310.8940148 1.3046880.632239664 1.895903  
0.750577485 1.4277892.1698552.1124020.9306776 2.7377471.1417330.7366832  
5.2970272.3700230.2856796 1.5749630.5329466 0.1607268 0.9114187  
1.5518552.0254690.5570083 4.2632840.9132238 1.540221467 2.551537  
1.0030740.4236077 1.6660871.634560297 0.4982967 1.0532712.392202  
1.4097741.0909730.9271763.0373210.2747031 0.3329919 1.3981540.5703106  
0.4569928 0.8291182.5143990.7872651 0.5725377 1.2561151.026745  
1.7187010.377661349 0.8571362 2.7351920.575290319 0.7968331 0.6534457  
2.3022330.9771344 1.2115690.5992151.343625479 0.3646091 0.4345673  
1.9325810.8200168 0.5812224 1.0476750.8399909 1.8459060.240216  
0.306246944 1.8742140.7038705 2.6334270.3687364 0.8116672 0.9676493  
1.1404431.8692250.8647757 0.9300782 1.1326061.0908172.1836520.8936284  
0.6883553 4.4880871.0984951.2597740.776718953 3.1531952.9520030.6705088  
2.33665 1.5887810.6699808 0.666529801 0.8703685 4.4288280.7708083  
0.7446661 0.792654691 0.3399379 3.1248731.6148031.0273621.639152

|             |             |             |             |             |             |             |             |  |  |
|-------------|-------------|-------------|-------------|-------------|-------------|-------------|-------------|--|--|
| 0.8488109   | 0.2811589   | 0.8201843   | 1.19628     | 1.0038621   | 1.3928691   | 1.07883     |             |  |  |
| 1.7262670   | 0.320398454 | 0.172337469 | 5.7437810   | 0.965248612 | 0.585899335 | 1.675169    |             |  |  |
| 0.648818562 | 1.3363340   | 0.9837441   | 3.57465     | 0.71441799  | 3.1207630   | 0.6495141   |             |  |  |
| 2.7213381   | 1.401792899 | 0.7559591   | 3.1711920   | 0.9207530   | 0.6510021   | 1.2588660   | 0.8410204   |  |  |
| 0.4273912   | 1.8566950   | 0.6827150   | 0.7123593   | 0.9100843   | 1.741681437 | 2.725966    |             |  |  |
| 0.40127424  | 1.9774341   | 0.0011250   | 0.7840271   | 5.3483490   | 0.6858892   | 1.361943    |             |  |  |
| 2.5916892   | 0.2495370   | 0.7165437   | 1.126201428 | 0.9486782   | 1.1978630   | 0.5161675   |             |  |  |
| 0.9582592   | 0.4666071   | 0.27545     | 0.9565285   | 0.7440475   | 0.3081854   | 3.981854    |             |  |  |
| 1.8488911   | 0.2916820   | 0.8276572   | 1.0629231   | 0.409553654 | 0.8514474   | 0.8620441   |             |  |  |
| 1.8826380   | 0.5943785   | 2.0776570   | 0.6977152   | 0.2938810   | 0.7572955   | 2.2834621   | 1.886217    |  |  |
| 0.640869528 | 0.691112096 | 1.6454392   | 0.3114461   | 0.49522     | 1.6772351   | 0.3314941   | 0.247624    |  |  |
| 0.7130821   | 0.9014057   | 0.2174953   | 0.7832917   | 0.7236407   | 0.2286714   |             |             |  |  |
| 1.1101981   | 0.3884370   | 0.4952843   | 0.6371855   | 1.1213440   | 0.5041273   | 1.084727934 |             |  |  |
| 3.8692741   | 0.8228560   | 0.4873291   | 1.8519771   | 0.9176391   | 0.9707610   | 0.6441469   | 0.2628546   |  |  |
| 1.5377251   | 0.0767491   | 0.4951640   | 0.702522747 | 1.1066430   | 0.4924397   | 1.0411020   | 0.5438387   |  |  |
| 0.5243139   | 0.593002068 | 0.4490010   | 0.6244446   | 1.7651      | 0.6528443   | 0.5990991   |             |  |  |
| 0.8240777   | 0.897144619 | 0.5449385   | 5.0558212   | 0.7119760   | 0.6137825   | 0.442882348 |             |  |  |
| 1.1241011   | 0.6209212   | 0.3623231   | 0.309316084 | 0.748214617 | 0.5991781   | 0.4521525   |             |  |  |
| 0.7074592   | 0.9681089   | 1.1127450   | 0.6081803   | 3.14912     | 0.7197837   | 0.6852487   |             |  |  |
| 1.5215721   | 0.2157280   | 0.8180295   | 1.851311606 | 0.4625254   | 0.4901832   | 0.328999    |             |  |  |
| 1.1427911   | 0.0823361   | 0.3949590   | 0.4667843   | 2.8227561   | 0.8759381   | 0.83665     | 1.571256    |  |  |
| 1.4184180   | 0.9389651   | 1.1348913   | 0.8376650   | 0.3504625   | 2.2058180   | 0.5402546   |             |  |  |
| 3.2334230   | 0.2460314   | 1.7784451   | 0.4033711   | 0.2514723   | 0.0253180   | 0.5288034   | 0.1828734   |  |  |
| 3.1806830   | 0.8595268   | 0.2577146   | 2.0008381   | 0.4899732   | 0.3102920   | 0.3258875   |             |  |  |
| 0.2265642   | 0.5336383   | 0.8942353   | 1.7203981   | 0.8358451   | 0.7155940   | 0.3154405   |             |  |  |
| 2.12069     | 0.3210443   | 1.1025224   | 0.0724216   | 0.8002793   | 0.41277     | 1.0067910   | 0.613451622 |  |  |
| 0.6523308   | 5.0875870   | 0.9682393   | 5.3432820   | 0.4005721   | 0.565386961 | 0.656588139 |             |  |  |
| 0.4372113   | 0.711637322 | 1.0270661   | 0.9672880   | 1.23717     | 0.4605431   | 0.107151    |             |  |  |
| 1.0614391   | 0.5293281   | 0.8862480   | 0.6850947   | 1.4677640   | 0.791048922 | 0.33805862  | 0.095973    |  |  |
| 2.7335880   | 0.5277724   | 2.69202     | 1.3898721   | 0.10183     | 1.24679     | 1.1512121   | 0.876851    |  |  |
| BNC2-AS1    | 0.4497298   | 0.4266859   | 0.2401274   | 1.70066514  | 0.18266465  |             |             |  |  |
| 0.4831471   | 1.3574691   | 0.6826040   | 0.9782483   | 1.4727320   | 0.4603044   | 0.884114067 |             |  |  |
| 0.4919319   | 1.587009094 | 1.269933702 | 0.5024780   | 0.2174871   | 0.3297570   | 0.1536599   | 0           |  |  |
| 0.2937622   | 0           | 0           | 0.03765824  | 0           | 0.3581596   | 0.4764149   | 0.03596122  |  |  |
| 0.1161765   | 1.199856155 | 1.2664220   | 0.182266238 | 0.04059387  | 0           | 0.1166594   | 0           |  |  |
| 0.4708736   | 0.          |             |             |             |             |             |             |  |  |

|             |             |             |             |             |             |             |
|-------------|-------------|-------------|-------------|-------------|-------------|-------------|
| 0.3621055   | 0.571441408 | 0.1142391   | 0.510938702 | 0.4561726   | 0           | 0.4918788   |
| 0.2130991   | 0.5195033   | 0.1340641   | 0.2176514   | 0.4513007   | 0.09604756  |             |
| 0.7849514   | 0.2955920   | 0.08135323  | 0.05257419  | 0           | 0.2961093   | 0.03133619  |
| 0.1062827   | 0.1942632   | 0.5651423   | 1.367486349 | 0.03396688  | 0.3223521   |             |
| 0.1939886   | 0.5722309   | 0.712892342 | 0.09127678  | 0.6632159   | 0.08834634  | 0           |
| 0.05204214  | 0.4717718   | 0.03622194  | 0.5031944   | 0.0663007   | 0           | 0.05223406  |
| 0.06975903  | 7.4355870   | 0.05150332  | 0.1456612   | 0           | 0.7314093   | 0.05621919  |
| 0           | 0.1570081   | 0.05445933  | 0.087816902 | 0.3944918   | 0.4987358   | 0.1054294   |
| 0.5469112   | 0.05902452  | 0.1055411   | 0.189324654 | 0           | 0           | 0.2125594   |
| 0.4703692   | 0.3077350   | 0.1943268   | 0.4321642   | 0.318736199 | 0           | 0.07681287  |
| 0           | 0           | 1.06351     | 0.09162437  | 0           | 0.2640125   | 0.2077676   |
| 0.8080728   | 0           | 1.9909150   | 0           | 0.2403774   | 0.04806672  | 0.2798423   |
| 0.1325345   | 0.1180982   | 0           | 0.6419759   | 0.08074043  | 0.043604753 | 6.825682    |
| 0.05394028  | 0.03460656  | 0.4448026   | 1.814957003 | 0.2394962   | 1.040739    |             |
| 0.2718710   | 0           | 0           | 0.04952116  | 0           | 0           | 1.112067184 |
| 0.07602109  | 0.192186843 | 0.20639157  | 0.4425769   | 0           | 0           | 1.63818     |
| 0.302929054 | 0.07005562  | 0.07827396  | 0.03994295  | 0.982565116 | 0           | 0.08542519  |
| 0.7027554   | 1.4608      | 0           | 0.05067634  | 0.1957212   | 0.0372922   | 2.032194    |
| 0.07586526  | 0.1024838   | 0.201922135 | 0.1686945   | 0.531940028 | 0.4838839   |             |
| 0.4584590   | 0.1760002   | 0.2524994   | 0           | 0.08543747  | 0.2525209   | 1.6188260   |
| 0.889201901 | 0.2506393   | 0.1219009   | 0.02813997  | 0           | 0.9069522   | 0.0435884   |
| 0.3369511   | 0.1597181   | 1.1760970   | 0.1168888   | 0.1671096   | 0.4589363   |             |
| 1.8089621   | 0.2914020   | 0.083830719 | 0.6722675   | 0.2960759   | 0.2666421   | 0.2592305   |
| 0           | 0           | 0.3436114   | 0.07539106  | 3.5041990   | 0.2243589   | 0.097827436 |
| 0.1620470   | 0.1794089   | 1.9020190   | 0.3491271   | 0           | 0.4285062   | 3.3432670   |
| 0.7470049   | 3.8859560   | 0.06136794  | 0.1745312   | 0.1074103   | 0.1926746   | 0           |
| 0.9726508   | 0.0744221   | 0.5078965   | 0.451585971 | 0.04788948  | 0           | 0.371949    |
| 0.05654009  | 0           | 1.1531920   | 0.07023408  | 0.1504658   | 0           | 0           |
| 2.6394820   | 0.1610784   | 0.6810946   | 0.08894558  | 1.0504650   | 0.198703679 | 0.1869248   |
| 0.03574508  | 0.2309477   | 1.5571150   | 0.2165951   | 0.07257334  | 0.502140135 |             |
| 1.8501220   | 0.1543522   | 0.5059728   | 0.2399446   | 0.713609321 | 0.07570222  |             |
| 1.1643781   | 0.3837133   | 0.06175326  | 0.050388285 | 0.1016259   | 0.03339686  | 0.3037281   |
| 0.1055570   | 0.1856750   | 0.05462578  | 0.1831225   | 0.5088737   | 0.1161325   |             |
| 0.03199629  | 0           | 0           | 0.2118107   | 3.08655     | 0.9695919   | 0.3685451   |
| 0.3703263   | 0           | 1.7108790   | 0           | 0.04232631  | 0.04510805  | 0           |
| 0.1246408   | 0.5349739   | 0.1957638   | 0.06510693  | 0.05177365  | 0           | 0.5470038   |
| 0.04228062  | 6.0968510   | 0.2751844   | 0.3768559   | 0           | 0.1192773   | 2.9504710   |
| 0           | 0.0608037   | 0.1119286   | 0.04323071  | 0.2591871   | 2.2593630   | 0           |
| 0.3842833   | 2.2324720   | 1.0107650   | 0.1507144   | 0.1571579   | 0.1161995   | 0           |
| 0.6780205   | 0           | 1.2899750   | 0.5273277   | 0.05038628  | 0           | 0.6236946   |
| 2.186767634 | 0.2634451   | 0.120699996 | 0.1906778   | 0           | 0           | 0.3616306   |
| 0.2040996   | 0.2535066   | 0.6822168   | 1.2121380   | 0.08479324  | 0           | 0.12349638  |
| 1.2154650   | 0.3947212   | 0.8308099   | 0.1467612   | 0.03880997  | 0.07106707  |             |
| 0.05097855  | 1.23385     | 0.1151106   |             |             |             |             |

AC078778.1 0.02611374 0 0 0 0 0 0 0.08194284 0 0 0.04963726  
0.044491572 0.07957175 0.074872122 0.047930478 0.1264318 0.1231275 0  
0.02899754 0.1012268 0.110873211 0.09055274 0.4657311 0.3126896  
0.1772904 0.4731244 0.2213057 0.2443079 0.04384792 0.036228461  
0.1318564 0.055033474 0 0.5844602 0.04403019 0 0.1421756  
0.2092675 0.6063512 0.1801571 0 0 0.06232056 0.3382381  
0.05082947 0.3167249 0.03278229 0.04145466 0.05343536 0 0.03654036  
0.1106605 0.09321131 0.103960516 0 0.2422116 0.1951189 0  
0.1121634 0.1270506 0.2518723 0.1525610.2554817 0 0.04147521  
0.047694034 0 0.4132772 0 0.039251287 0.2007396 0 0.2888504  
0.131554297 0.2906953 0.04495924 0.1193217 0.1340276 0.1469718 0  
0.2791679 0.1939452 0 0.08870794 0 0.1734607 0.07657966  
0.4920142 0 0.09958107 0 0.141989467 0 0 0.2227924 0.127605049  
0.1037420.04377233 0.1089540.07735813 0.1073939 0.06506647 0.04762072  
0.3420764 0.05943118 0.1025008 0.02875684 7.5885410.105186034 0  
0.1875184 0.03094123 0 0.1307157 0.1517974 0.04107354 0  
0.1087523 0.06583563 0.1785021 0 0.07937127 0.2827446 0.4222009  
0.3311578 0.08022753 0 0.08531954 0.0543288 0.0256399 0.1216638  
0 0.1079871 0 0.1722507 0.2730701 0.06668824 0.3951319 0  
0.05935283 0.08202641 0.04747954 0.07507063 0.1510352 0 0.07898642  
3.7617390 0.03887729 0.05497619 0.1608195 0 0 0.186499432  
0.0592588 0.08221726 0 0.1861138 0 0.03979168 0.1876527  
0.08910932 0.4780063 0.035727933 0.1350404 0.04418259 0.04575703  
0.2406758 0.1159133 0.2485407 0.2032571 0 0.08896887 0.192478438  
0.0522481 0.1802321 0.08697331 0.03540679 0.3377308 0 0.8299519  
0.1425335 0.1328599 0 0.06750313 0.0336672 0 0.1252332  
0.09392763 0.05037135 0 0.1814489 0.072566335 0.2534868 0.2334352  
0 0.2317261 0.3634466 0.2133142 0 0.03760851 0 0.0783683 0  
0 0.1581857 0.1964006 0.1641775 0.1365913 0.3109503 0.392968  
0.1121432 0.09983116 0.1348463 0 0.4377142 0.1126388 0.3182583  
0.123061134 0.135394195 0.3443072 0.036268064 0.038948674 0 0.134569776  
0 0 0.1404183 0 0.2644075 0.1477128 0.1206038 0.148337873  
0.3110943 0.06448321 0.0353650.2025339 0.1061374 0.1147591  
0.2216103 0.1689001 0 0.02863345 0.07735993 0.114315706 0.3183477  
0.182515899 0.2087199 0.04943826 0.02657075 0.04764979 0.136787  
0.03224624 0.04765385 0.03702942 0.2064118 0.033560707 0.06306503  
0.1380254 0.08496584 0.09375 0 0 0.08478252 0.1205632 0.07609516  
0.7058683 0 0.03849201 0 0.03749288 0.063279625 0.02537306  
0.07449764 0.1006374 0.1467601 0.3546679 0.08316739 0.03705358  
0.08536343 0.1679457 0.3387146 0.073845048 0.229714372 0.2446424 0  
0 0.3011870 0 0.1173798 0 0.03759178 0.2256396 0.3242652  
0.1580938 0.2702622 0.07272024 0.1592645 0 0.1404438 0.1045597  
0.204527826 0.1084481 0.03842214 0.1020966 0 0 0.03784726  
0.3180972 0 0.3241215 0.1395786 0.5481708 0.056476132 0

|             |             |             |             |             |             |             |            |             |
|-------------|-------------|-------------|-------------|-------------|-------------|-------------|------------|-------------|
| 0.2431801   | 0.04284369  | 0.06714058  | 0.07551847  | 0.224987234 | 0.0235167   |             |            |             |
| 0.02698217  | 0.1162206   | 0.1410466   | 0           | 0.05478199  | 0.103374689 | 0           |            |             |
| 0.2330255   | 0.06944247  | 0.2328714   | 0.085052851 | 0           | 0           | 0           | 0          | 0.076071203 |
| 0.07671234  | 0.1008385   | 0.1528461   | 0.1195196   | 0.0409205   | 0.07007839  |             |            |             |
| 0.1237028   | 0.06911503  | 0.1600514   | 0.1314939   | 0.1207620   | 0.062741134 | 0           |            |             |
| 2.6122920   | 0.09148706  | 0.1669178   | 0.1764815   | 0.1397704   | 0.07334433  |             |            |             |
| 0.05739809  | 0.2275342   | 0.2368997   | 0.03195002  | 0.1702491   | 0.2879343   |             |            |             |
| 0.07005503  | 0.3292979   | 0.04486945  | 0.08866338  | 0           | 0.3517321   | 0.04252394  |            |             |
| 0.1376353   | 0.3510708   | 0           | 0.03844812  | 0.0830892   | 0.2528619   | 0.3824332   |            |             |
| 0           | 0           | 0.0295576   | 0.4237773   | 0.2294884   | 0.2534680   | 0.06526541  | 0.05589926 |             |
| 0.05329627  | 0.1025355   | 1.0199140   | 0.03223069  | 0.09912834  | 0.2540369   |             |            |             |
| 0.06936143  | 0.05688338  | 0.1581742   | 0           | 0.07611116  | 0.06824051  | 0           |            |             |
| 0.0768740   | 0.03618667  | 0.3423068   | 0           | 0.05538775  | 0.065147469 | 0.034389203 | 0          |             |
| 0.045555201 | 0.04797771  | 0.2098921   | 2.5957740   | 0.6141980   | 0.05135486  | 0.1148157   |            |             |
| 0.2253      | 0.1016647   | 0.01771838  | 0.1920185   | 0.06765004  | 0.031073751 |             |            |             |
| 0.04828916  | 0.3220150   | 0.08513009  | 0           | 0.1661741   | 0.08788713  | 0.2145799   |            |             |
| 0.4232928   | 0.04233509  | 0.4344563   |             |             |             |             |            |             |
| AC087286.2  | 0.04486815  | 0.1844662   | 0           | 0.767203879 | 0.047382103 | 0.1392505   |            |             |
| 0.5868654   | 0.2463872   | 0.3171896   | 1.2279150   | 0.04264292  | 0.305778441 |             |            |             |
| 0.1367187   | 0.096482939 | 0.329413106 | 0.1810274   | 0.1410370   | 0.1245576   |             |            |             |
| 0.04348153  | 0.047625084 | 0.1944826   | 0.02353561  | 0.0732624   | 0.06092344  |             |            |             |
| 0.2322611   | 0.04753043  | 0.09328122  | 0.1883468   | 0           | 0.2831915   | 0.141836273 |            |             |
| 0           | 0.2953555   | 0.03782593  | 0.024417764 | 0.09160631  | 0           | 0.05787898  |            |             |
| 0.1547713   | 0           | 0           | 0.3212342   | 0.3228636   | 0.1310014   | 0.03023283  |            |             |
| 0.02816297  | 0.03561332  | 0           | 0.2197053   | 0.03139149  | 0.1140809   | 0           | 0          |             |
| 0.1061848   | 0.08917791  | 0           | 0.04627243  | 0.02408964  | 0           | 0.04327624  |            |             |
| 0.1638297   | 0.2560624   | 0.03881434  | 0           | 0.040973511 | 0           | 0.1014408   |            |             |
| 0.06581656  | 0.067440848 | 0.03449071  | 0           | 0           | 0.414396035 | 0.1248669   |            |             |
| 0.03862407  | 0.2733552   | 0.07676127  | 0.03156554  | 0.08547066  | 0.1027845   | 0           |            |             |
| 0.07130915  | 0.3429368   | 0.130713982 | 0.04257672  | 0.06578889  | 0.0281790   | 0           |            |             |
| 0           | 0.146378232 | 0           | 0.02017049  | 0           | 0.054812169 | 0.2228095   | 0          | 0.3276049   |
| 0           | 0           | 0.02794901  | 0.08182105  | 0.03265274  | 0.05105679  | 0.2054674   |            |             |
| 0.247047396 | 8.6676340   | 0.0493035   | 0           | 0.1594880   | 0.09212768  | 0.2245933   | 0          |             |
| 0.2822872   | 0           | 0.03114269  | 0.4524703   | 0.03833739  | 0           | 0.06818713  | 0          |             |
| 0.1280149   | 0           | 0.1723069   | 0           | 0.03664862  | 0.233366889 | 0           | 0.2351705  |             |
| 0.5786737   | 0.06184718  | 0           | 0.1775748   | 0.2736908   | 0.05729126  | 0.02828785  |            |             |
| 0           | 0           | 0           | 0           | 0.1074875   | 0.03243824  | 0.0338730   | 0.06785651 | 13.79874    |
| 0.03275001  | 0.06679825  | 0.1889182   | 0.02302642  | 0           | 0.03645729  | 0           |            |             |
| 0.1527261   | 0.1412642   | 0.028473965 | 0.03197774  | 0           | 0           | 0.3224215   |            |             |
| 0.0382765   | 0.4106508   | 0.12277417  | 0           | 0.03795686  | 0.07861889  | 0.0229736   |            |             |
| 0.06638671  | 0.1830164   | 0.08730814  | 0           | 0.8152784   | 0.206695596 | 0.04488587  |            |             |
| 0           | 0.04981198  | 0.1825059   | 0           | 0           | 0.05941701  | 0           | 0.4280203  | 0           |
| 0.02899566  | 0.2747703   | 0           | 0           | 0.8069237   | 0.04327357  | 0           | 0.03897028 |             |
| 0.124682158 | 0.1451788   | 0.02864887  | 0.1531698   | 0.05687822  | 0.03469263  |             |            |             |

|                     |                   |                                   |             |                    |                    |            |             |
|---------------------|-------------------|-----------------------------------|-------------|--------------------|--------------------|------------|-------------|
| 0.02617947          | 0.028277022       | 0.03230913                        | 0.03497946  | 0.04488367         | 0.1442239          |            |             |
| 0.06538734          | 0.3106193         | 0.08436297                        | 0.1410434   | 0.0704066          | 0                  | 0          |             |
| 0.1605686           | 0.08576404        | 0                                 | 0.1923332   | 0                  | 0.04838349         | 0          | 0.105720702 |
| 0.023263184         | 0.1478956         | 0.311575639                       | 0.100381355 | 0                  | 0                  | 0.2519687  |             |
| 0.5311676           | 0.02412642        | 0                                 | 0           | 0.0259024          | 0                  | 0.05345165 | 0.05539694  |
| 0.1822905           | 0.09666393        | 0.04559086                        | 0.03286284  | 0                  | 0.02418342         | 0.1520593  |             |
| 0.04919747          | 0.1993776         | 0.065471723                       | 0.05469793  | 0                  | 0.2017230.08494392 |            |             |
| 0.09130678          | 0                 | 0.07834166                        | 0.08310735  | 0.04093899         | 0                  | 0.03546529 |             |
| 0.259485282         | 0.1083572         | 0.1581018                         | 0.1459868   | 0                  | 0.08020156         | 0          | 0           |
| 0.1035748           | 0.8280537         | 0.07580063                        | 0           | 0.06613627         | 0.1117223          | 0.06441958 |             |
| 0.027181475         | 0.0653933         | 0                                 | 0           | 0.02101338         | 0.07617299         | 0          | 0.07333494  |
| 0                   | 0                 | 0.095159415                       | 0           | 0.05254252         | 0                  | 0.1057226  | 0.09703012  |
| 0.03594666          | 0.4013819         | 0.1176465                         | 0.03264514  | 2.7127590.06461497 | 0.07959236         |            |             |
| 0.02263616          | 0.0928719         | 0.3123665                         | 0.08551419  | 0.1401665          | 0.1447848          | 0          |             |
| 0.29284666          | 0.1242224         | 0                                 | 0.2631309   | 0.03666539         | 0                  | 0.06502848 |             |
| 1.3663720.09757482  | 0.02784499        | 0                                 | 0.04485033  | 0.072777198        | 0.06846656         |            |             |
| 0.1044569           | 0.07361326        | 0.02883993                        | 0.09731585  | 0.107380271        | 0.7273073          |            |             |
| 0.04636028          | 0.1497661         | 0                                 | 0.04681954  | 0                  | 0.148013759        | 0.6417406  |             |
| 0.2001901           | 0.0298287         | 0.5112586                         | 0.048712088 | 0                  | 0                  | 0.08157424 |             |
| 0.041364596         | 0.032676039       | 0.4118929                         | 0.04331471  | 0.06565436         | 0.06845215         |            |             |
| 0.03515443          | 0.1204074         | 0                                 | 0.02968805  | 0.6049943          | 0.1129652          | 0          |             |
| 0.02824767          | 0                 | 0                                 | 12.858640   | 0.07169878         | 0.0909682          | 0.4803020  | 0           |
| 0.04886814          | 0                 | 0.1097919                         | 0           | 0.08994974         | 0.06018364         | 0.08082767 |             |
| 0.09636735          | 0.05077993        | 0                                 | 0           | 0.01826596         | 0.1182412          | 0.02741834 | 0           |
| 0                   | 0.1900775         | 0                                 | 0           | 0.1640002          | 0.02539266         | 0.05600973 | 0           |
| 0.09677871          | 0.1401723         | 0                                 | 0.4578634   | 0                  | 0.0649036          | 0          | 0.04258013  |
| 0.03117726          | 0                 | 0.2199060                         | 0           | 0.0326932          | 0.1172496          | 0          | 0.4843062   |
| 0                   | 0.03267474        | 0                                 | 0.1427493   | 0.279837991        | 0.295434516        | 0          | 0           |
| 0.03606327          | 0                 | 0.03908533                        | 0.2867702   | 0.1972742          | 0.2488541          | 0          | 0.0152217   |
| 0.1649614           | 0                 | 0.053390354                       | 0           | 0.06916004         | 0                  | 0          | 0.07137931  |
| 0.05033535          | 0                 | 0                                 | 0.19906     |                    |                    |            |             |
| AL031670.1          | 0.2655872         | 0                                 | 0.3072482   | 0.189220688        | 0.186978703        | 0.2747543  |             |
| 0.4342278           | 0.2083479         | 0.3911531                         | 0.09614251  | 0.4206925          | 0.377081037        |            |             |
| 1.0115960.38073985  | 0.203113462       | 1.8573570.6261284                 | 0.2977542   | 0.07372917         |                    |            |             |
| 0.8150351.174609692 | 0.5372255         | 0.7894455                         | 0.9395985   | 0.8114019          |                    |            |             |
| 0.5155570.3047916   | 1.1733350.4459511 | 0.153524196                       | 0.6425781   | 0.746283527        |                    |            |             |
| 0.07791111          | 1.4569110.3731707 | 0.144535644                       | 0.3614958   | 0.3547226          | 1.71301            |            |             |
| 0.6871015           | 0.4031695         | 1.0172361.0563751.1785250.9046734 | 0.805305    |                    |                    |            |             |
| 0.3056250.8783554   | 0.3170179         | 0.4334993                         | 0.2787226   | 0.4314270.6319977  |                    |            |             |
| 0.146850057         | 0.2095125         | 0.7918039                         | 0.9591448   | 0.4793243          | 0.9030916          |            |             |
| 0.8614374           | 0.8965751         | 0.6788279                         | 0.2887058   | 0.4595061          | 0.4218196          |            |             |
| 0.282956085         | 0                 | 1.3009890.3895868                 | 0.731869292 | 0.5444274          | 0.1564296          |            |             |
| 0.9792418           | 0.668980147       | 1.0676210.07620893                | 0.5056458   | 0.4543717          |                    |            |             |
| 0.7162404           | 0.2529625         | 1.8590330.3835419                 | 0.1406997   | 0.3947105          | 0                  |            |             |

0.6930650.6490384 2.3907920.03417214 0.5696885 0.6332072 0.409158884  
0.3266608 0.2785881.1958860.486673068 0.8792482 0 0.7387375  
0.06556362 1.2970340.3584492 0.4843219 1.0952580.3777744 0.4343642  
0.536192556 6.7238860.208013637 0.2918414 1.6290130.02622373 0.3635532  
0.5760870.1286534 0.1044336 0.1443623 1.1060540.8090697 0.5673246  
1.0409320.7736029 1.2666453.1994170.6214777 0.3399777 0 0.6869562  
0.322318394 0.2390375 0.7733559 0.2730338 0.2745682 0.513090676  
0.9927202 1.00289 0.2826026 0.8651263 0.1331781 0.5030352  
0.3476007 2.2937090.3181244 0.1280074 1.2030230.7586946 6.477613  
0.03230943 0.4942471 0.2795650.5451996 0.2673869 0.6114362  
0.316129082 0.5524621 0.4877733 0.308999982 0.6624985 0.3190717  
0.2360735 0.9224434 0.6419467 2.1606740.333086873 0.3815043  
0.8238170.2326837 1.6771760.4912021 0.4513856 0.8244215 0.2486453  
0.42729 1.3050556 0.6642303 0.42007 0.6142734 0.4801351 0.7926596  
0.4819443 0.4396326 0.5637423 0.2815081 0.6978384 0.4290838  
0.9844259 0.2907975 0.3537979 0.3449629 0 0.2860721.499395  
0.430516868 1.0383861.0174840.03777732 0.6172435 0.9240998 1.265537  
0.390552589 0.3824938 0.1380355 0.3542388 0.2845673 0.387046137  
1.0916940.7906664 0.3130784 1.3660350.9077516 2.17595 0.3484987  
0.2876749 1.6381110.5218009 1.81779 0.6682562 0.6069029 1.355879853  
1.17046157 1.9940480.368860846 0.231072176 0.1258415 0.684314465  
0.4039409 1.2663860.3808297 0.503885578 1.6582971.3771070.6388484  
0.335256897 0.2109303 0.8197754 0.7493256 1.5258160.4497753  
0.6159940.4382517 0.5487360.2500227 0.2426781 0.9179120.968864057  
0.8094312 0.340314397 0.9950462 0.4399562 0.3828333 0.08076961  
0.3091510.6285848 0.9693178 0.09415102 0.8397164 0.398213587  
0.6413968 0.4289308 0.5580884 0.8210482 0.0263742 0.1394308  
0.6826323 0.5790280.4299547 1.1217130.2494570.4567258 0.330658  
0.1906588 0.697210939 0.2150452 0.8839495 0.3127431 0.6841128  
1.1272240.2114615 0.1256166 0.4340902 0.8184529 0.5741441  
0.438103135 0.272566918 0.3887675 0.2295576 0.5910354 1.021064  
0.9929661 0.2132212 0.9119303 0.1610299 1.01953 0.7012028  
1.6489540.4019695 1.1910931.3559230.7086557 0.4148426 0.6665728  
0.4135502 0.46225123 1.0110480.3582046 0.6489774 0.07234427 0  
0.2886914 0.4493302 0.09626216 1.3735190.7886501 1.0398040.311125241  
0.3715002 0.9789906 1.3435240.2560676 0.28802 0.78392413 0.7374541  
0.1143415 1.6498890.7172505 0.3926123 0.3714366 2.0735201  
0.7982657 2.1724660.5002660.4824511 0.672794753 0 0.3259040.4023841  
0.816162429 0.805911287 0.3900977 0.7264440.2266989 0.2701251  
0.5895855 0.1781814 0.8736858 0.1757319 0.7325043 0.4086335  
0.4503394 1.0311030.42540177 0.3387705 7.5395860.8916912 0.4951395  
0.4786369 0.8292209 0.6837796 0.1459404 0.9160037 0.401561  
0.2978658 0.2308669 0.6655474 0.29687 1.5549360.9126809 0.4759196  
0.4581815 2.28547 1.3334970.7387867 0.02704948 0.1950263 0.2606886



|                                           |                           |                           |                   |                           |             |           |
|-------------------------------------------|---------------------------|---------------------------|-------------------|---------------------------|-------------|-----------|
| 1.0563130.5893498                         | 0.6887656                 | 0.3815447                 | 1.0246950.8266849 | 1.547175                  |             |           |
| 1.5170930.5489913                         | 0.1382866                 | 0.3790121                 | 0.7227261         | 1.5207891.34464           |             |           |
| 0.1092664                                 | 0.3360584                 | 0.5536410.7054337         | 0.2169476         | 1.2735510.4832093         |             |           |
| 0.9676015                                 | 0.5494432                 | 0.331073726               | 0.4995087         | 0.5213801                 | 0.9025848   |           |
| 0.04743775                                | 0.2816579                 | 0.30368069                | 0.437190091       | 0.3370837                 | 1.042458259 |           |
| 0.44729                                   | 0.4980936                 | 1.6500051.3495830.1740999 | 0.9406648         | 1.145696                  |             |           |
| 0.1292464                                 | 0.2703046                 | 0.4611028                 | 0.6880282         | 0.447712836               | 0.04092669  |           |
| 1.1257890.8297321                         | 0.09663994                | 1.00934                   | 1.7628660.9547845 | 2.3156                    |             |           |
| 0.4664454                                 | 1.178292                  |                           |                   |                           |             |           |
| AC022893.1                                | 0.5840824                 | 5.7203250.2702815         | 4.886628254       | 0.127767463               | 0.233065    |           |
| 2.1895842.6313836.4885782.6496160.7295797 | 0.952488212               | 1.7501080.496415461       |                   |                           |             |           |
| 3.499492144                               | 0.06733057                | 0.2032697                 | 0.1042373         | 0.08802211                | 0.7034966   |           |
| 0.115137565                               | 1.25863                   | 0.3370188                 | 0.1407860.2039364 | 0.5183171                 | 0.1281674   |           |
| 0.3252621                                 | 0.1821375                 | 0.046303832               | 0.8584318         | 0.083527137               | 0.04405962  |           |
| 0.2032286                                 | 0.1266194                 | 0.476796577               | 0.5735396         | 0.1588081                 | 0.2690908   |           |
| 0.69078                                   | 0.13818                   | 0.1314877                 | 0.5675228         | 0.8706128                 | 0.09744822  | 0.3485848 |
| 0.09951074                                | 0.08609814                | 0.1664717                 | 0.9295225         | 0.2335123                 | 0.102541    |           |
| 0.1042422                                 | 0.077509024               | 0.03949391                | 0.3372126         | 0.1246913                 | 0.1204726   |           |
| 0.3180729                                 | 0.6766010.2736317         | 0.3168574                 | 0.1564637         | 0.2309831                 |             |           |
| 0.4041992                                 | 0.297170519               | 0.06291474                | 0.1603502         | 0.1774766                 | 0.501673256 |           |
| 0.1218691                                 | 0.1179503                 | 0.57941                   | 0.126105302       | 0.7740409                 | 0.1364739   |           |
| 0.1779235                                 | 0.4853544                 | 0.4167825                 | 0.1430532         | 0.6371540.1859120.2320712 |             |           |
| 0.1877826                                 | 0.105337275               | 0.1227275                 | 0.09379876        | 0.1624520.08374051        |             |           |
| 0.2107996                                 | 0.9756544                 | 0.158792954               | 0.0426301         | 0.04876383                | 0.4567904   |           |
| 0.173286147                               | 0.5469474                 | 0.1958099                 | 0.1392548         | 0.2718978                 | 0.08149863  |           |
| 0.5821332                                 | 0.6086435                 | 0.2307497                 | 0.1091916         | 0.4967345                 | 0.087291472 |           |
| 5.4832210.207260055                       | 0.1100264                 | 0.1048549                 | 0.7217179         | 0.1027967                 |             |           |
| 0.1002412                                 | 0.07275498                | 0.2362336                 | 0.1632770.1158308 | 0.1788080.4420304         |             |           |
| 0.1864087                                 | 0.05706278                | 0.3420182                 | 0.5634244         | 0.2305227                 | 0.5126967   |           |
| 0.07613979                                | 1.5130330.295111467       | 0.05325211                | 0.3158578         | 0.1310092                 |             |           |
| 0.5693286                                 | 0.085972928               | 0.1706199                 | 0.1526931         | 0.3622474                 | 0.1052126   |           |
| 0.07531372                                | 0.2180953                 | 0.3494616                 | 0.09102587        | 0.09994611                | 0.1146169   |           |
| 0.1196865                                 | 0.06730203                | 1.9937540.0609045         | 0.09316747        | 0.1053981                 |             |           |
| 0.1370296                                 | 0.07560517                | 0.08813851                | 0.104285185       | 0.1704129                 | 0.3349502   |           |
| 0.063542915                               | 0.1486708                 | 0.2646434                 | 0.1716458         | 1.1452370.1637186         |             |           |
| 0.3945673                                 | 0.114160259               | 0.1294470.1552926         | 0.2119985         | 0.5084098                 |             |           |
| 0.9753179                                 | 0.3460242                 | 0.2180331                 | 0.1347529         | 1.1560690.069189735       |             |           |
| 0.2003359                                 | 0.3599309                 | 0.1991637                 | 0.1923280.3112903 | 0.1710086                 |             |           |
| 0.2651917                                 | 0.3567554                 | 0.4669751                 | 0.1691295         | 0.4799113                 | 2.425831    |           |
| 0.1096329                                 | 0.3267921.0504330.3138523 | 0.03370354                | 0.3696083         | 0.06376391                |             |           |
| 1.0056980.2930273                         | 0.2919679                 | 0.1269303                 | 0.3871029         | 0.2726383                 |             |           |
| 0.042068942                               | 0.06609307                | 0.2797174                 | 0.1252038         | 0.1519857                 | 2.50494864  |           |
| 0.2960467                                 | 0.5334193                 | 0.2295085                 | 0.1614849         | 0.2759914                 | 0.4227313   |           |
| 0.1134703                                 | 0.08612653                | 0.1867103                 | 0.6974721         | 0.2587435                 | 0.08097997  |           |

|             |             |             |             |             |             |
|-------------|-------------|-------------|-------------|-------------|-------------|
| 0.06991325  | 0.157285237 | 0.095176511 | 0.5134048   | 0.115886121 | 0.143119091 |
| 0.3380328   | 0.035832189 | 0.08200166  | 2.5271240   | 0.1390889   | 0.058451907 |
| 0.5407054   | 0.1368747   | 0.1252424   | 0.323885651 | 0.08946261  | 0.1854369   |
| 0.2881515   | 0.09707248  | 0.2119609   | 0.1344515   | 0.1770259   | 0.3148138   |
| 0.07540837  | 0.08691692  | 0.2307065   | 0.219161472 | 0.2034412   | 0.297425316 |
| 0.4001493   | 1.35063     | 0.03820529  | 0.1141903   | 0.0874142   | 0.9942909   |
| 0.7384937   | 0.2484696   | 1.7279960   | 0.55226228  | 0.2871511   | 0.2572662   |
| 0.2409460   | 0.1148299   | 0.4872205   | 0.08410633  | 0.4131267   | 0.1605132   |
| 0.1904630   | 0.5850040   | 0.1007649   | 0.1844883   | 0.05194191  | 0.0419299   |
| 0.217359896 | 0.3202411   | 0.3213537   | 0.2143755   | 0.08987972  | 0.5595463   |
| 0.06643549  | 0.3137495   | 0.48642     | 0.7110364   | 0.1420497   | 0.082584107 |
| 0.058719887 | 0.6351294   | 0.4110885   | 2.4707340   | 0.5714087   | 0.1336985   |
| 0.9933413   | 0.1375219   | 0.03035474  | 0.3062951   | 1.6702670   | 0.3700405   |
| 0.1220784   | 0.3108814   | 0.4182489   | 0.1971959   | 0.09123264  | 0.2243777   |
| 0.1503433   | 0.17427223  | 0.2656658   | 0.09207673  | 1.1866470   | 0.08182303  |
| 0.02941808  | 0.1511651   | 1.86341     | 0.09072891  | 0.2692702   | 0.1189308   |
| 0.4003546   | 0.130830804 | 1.4196830   | 0.2816716   | 0.2464146   | 0.09117611  |
| 0.06635795  | 0.407373336 | 0.3719535   | 0.08190447  | 0.8076986   | 0.1051590   |
| 0.1393109   | 0.2888210   | 0.286268369 | 0.3684071   | 0.8066267   | 0.1886041   |
| 0.0702748   | 0.108706603 | 0.06390641  | 0.1316446   | 0.3868398   | 0.10000232  |
| 0.206607587 | 0.05515118  | 0.1288823   | 0.04883841  | 0.1527588   | 0.05230075  |
| 0.1343515   | 0.1054036   | 0.07729433  | 0.1994487   | 0.09803687  | 0.1196187   |
| 0.3256959   | 0.456079782 | 0.08940333  | 0.9700532   | 0.1461628   | 0.5022349   |
| 0.3045089   | 0.5191768   | 0.2753667   | 0.04126549  | 0.08179114  | 0.8856406   |
| 0.1020888   | 0.1142382   | 0.4600134   | 0.1343067   | 0.3231740   | 0.02508972  |
| 0.2266425   | 0.05496206  | 0.2185318   | 0.09511271  | 0.2565391   | 0.3875187   |
| 0.1470528   | 0.07985379  | 0.1128341   | 0.1009952   | 0.1527470   | 0.05034584  |
| 0.05083128  | 0.1416666   | 0.1979042   | 0.2126502   | 0.4724404   | 0.1042702   |
| 0.09377184  | 5.1259030   | 0.1556233   | 0.09655988  | 0.05664211  | 0.04751122  |
| 0.3478781   | 0.2271689   | 0.1317742   | 0.3285156   | 0.2312203   | 0.2553552   |
| 0.1417303   | 0.222888059 | 0.2169757   | 0.3757846   | 0.4921927   | 0.09836417  |
| 0.4203242   | 0.16132672  | 0.197788789 | 0.07624986  | 0.101892699 | 0.2759428   |
| 0.2011983   | 1.7625150   | 0.2980132   | 0.3076733   | 0.07337334  | 0.4833571   |
| 0.3086036   | 0.1019069   | 0.1738393   | 0.07565596  | 0.104253354 | 0.1465819   |
| 0.1286155   | 0.1156057   | 0.07286798  | 0.7831813   | 0.1357310   | 0.2571150   |
| 0.4426472   | 0.4210884   | 0.6898866   | 0.06865473  | 0.1159111   | 0           |
| 0.011756462 | AC022154.1  | 0.07792888  | 0.06865473  | 0.1159111   | 0           |
| 0.1036526   | 0.1274116   | 0.2270679   | 0           | 0.0483604   | 0.1269669   |
| 0.094837298 | 0.047878752 | 0.102167599 | 0.01796663  | 0.1049824   | 0.02139608  |
| 0.01236211  | 0.1834071   | 0.094534001 | 0.2316244   | 0.3036624   | 0.1454231   |
| 0.2267451   | 0.1728860   | 0.1768990   | 0.2661671   | 0.1121584   | 0.108113355 |
| 0.08431868  | 0.02612658  | 0.02931348  | 0.1126246   | 0.024234172 | 0.09091754  |
| 0.06691054  | 0.3733847   | 0.1536077   | 0.03687224  | 0.04385808  | 0.1062730   |
| 0.3044143   | 0.1300164   | 0.2250414   | 0.08385365  | 0.1060367   | 0.02278034  |
| 0.02725667  |             |             |             |             |             |

|             |             |             |             |             |             |
|-------------|-------------|-------------|-------------|-------------|-------------|
| 0.1713550   | 0.1698347   | 0.1788185   | 0.118186692 | 0.1405152   | 0.1032586   |
| 0.1164552   | 0.04592452  | 0.09563407  | 0.1263819   | 0.2147543   | 0.1138185   |
| 0.01815265  | 0.0385225   | 0.1414523   | 0.142329038 | 0.01865367  | 0.2768647   |
| 0.2286260   | 0.100400661 | 0.08557846  | 0.2360558   | 0.4378364   | 0.130861906 |
| 0.1962194   | 0.03833367  | 0.1017375   | 0.09523015  | 0.2506256   | 0.06362102  |
| 0.4420507   | 0.02756064  | 0           | 0.06618079  | 0.021621862 | 0.09507734  |
| 0.09794136  | 0.3216219   | 0.03437768  | 0.2971709   | 0.08308904  | 0.121064703 |
| 0.2275101   | 0.1401318   | 0.2532798   | 0.027200024 | 0.1769074   | 0           |
| 0           | 0.02289186  | 0.02773886  | 0.2436176   | 0.2916651   | 0.07600935  |
| 0.1019613   | 0.073556969 | 1.10288     | 0.074737445 | 0.1957312   | 0.2797971   |
| 0.02638147  | 0.0457175   | 0.1114523   | 0.08628485  | 0.08755149  | 0.05446148  |
| 0.1081799   | 0.05613353  | 0.09512285  | 0.0785395   | 0.1353489   | 0.06887915  |
| 0.5611482   | 0.1714302   | 0.0513034   | 0           | 0.2909845   | 0.04632245  |
| 0.08744557  | 0.2723027   | 0.1373381   | 0.06138216  | 0.028676496 | 0.1174931   |
| 0.0568605   | 0.07018791  | 0.05024218  | 0           | 0           | 0.1214477   |
| 0.05333966  | 0.06438868  | 0.03361831  | 0.08979508  | 1.32368     | 0.1300151   |
| 0.04687444  | 0.05713323  | 0.05043661  | 0.05427477  | 0.099384566 | 0.1768407   |
| 0.2628789   | 0.141299377 | 0.1586865   | 0           | 0.05089146  | 0.04799958  |
| 0.03798871  | 0.169818    | 0.106619674 | 0.2302795   | 0.1318501   | 0.09753471  |
| 0.2622099   | 0.03294378  | 0.1210935   | 0.08665169  | 0.04690143  | 0.1264295   |
| 0           | 0.1113709   | 0.01920894  | 0.07415619  | 0.03018895  | 0.2104322   |
| 0.04278028  | 0.4717622   | 0.2228024   | 0.02832014  | 0.0835757   | 0.0575553   |
| 0.2224693   | 0.03250519  | 0.0533889   | 0.1067809   | 0.0429482   | 0.1079223   |
| 0.5994977   | 0.046404262 | 0.1620981   | 0.2416844   | 0.01900227  | 0.1411264   |
| 0.1377272   | 0.05196527  | 0.098225444 | 0.1603310   | 0.06943291  | 0.06681929  |
| 0.09542632  | 0.064895706 | 0.04816934  | 0.1674573   | 0.1224850   | 0.1863393   |
| 0.2356676   | 0.1898656   | 0.1434252   | 0.1702384   | 0.1149742   | 0.02386089  |
| 0.3732090   | 0.1320542   | 0.01695982  | 0.209851619 | 0.10389723  | 0.2446393   |
| 0.015461648 | 0.066417738 | 0.06329923  | 0.05736922  | 0.1719260   | 0.1317935   |
| 0.1795877   | 0.116980724 | 0.3156190   | 0.2956379   | 0.147557147 | 0.02652488  |
| 0.3298825   | 0.1507666   | 0.2110617   | 0.1357442   | 0.1630787   | 0.1889519   |
| 0.3600239   | 0           | 0.09765513  | 0.2308583   | 0.146203772 | 0.1357167   |
| 0.2335740   | 0.08430524  | 0.1019478   | 0.04062772  | 0.1166289   | 0.2886887   |
| 0.08126236  | 0.03157245  | 0.3695857   | 0.114459673 | 0.2285277   | 0.1176848   |
| 0.2445004   | 0.06661185  | 0.01326642  | 0.04208083  | 0.1265044   | 0.1199287   |
| 0.07569466  | 0.3009228   | 0.07170215  | 0.08204875  | 0           | 0.01598381  |
| 0.202328276 | 0.1406202   | 0.2223166   | 0.1981262   | 0.3213011   | 0.08863893  |
| 0.09477916  | 0.1819589   | 0.2863916   | 0.1263495   | 0.188887861 | 0.097930864 |
| 0.2085899   | 0.1154692   | 0.05246387  | 0.2568015   | 0.05351458  | 0.04596508  |
| 0.05004085  | 0.03239969  | 0.1602597   | 0.09619371  | 0.07899392  | 0.1460288   |
| 0.2534775   | 0.2170125   | 0.1442811   | 0.06955632  | 0.2634430   | 0.04457547  |
| 0.174386883 | 0.1849326   | 0.0982798   | 0.09793216  | 0.01819486  | 0.05887488  |
| 0           | 0.1808132   | 0.04842059  | 0           | 0.2225656   | 0.072230001 |
| 0.1019277   | 0.1814251   | 0.1095897   | 0           | 0.09658415  | 0.03197187  |
| 0.08020432  | 0.02300585  | 0.1362533   | 0.08017386  |             |             |

|             |             |             |             |             |             |
|-------------|-------------|-------------|-------------|-------------|-------------|
| 0.06970127  | 0.02335443  | 0.058760349 | 0.09692191  | 0.2649132   | 0.05920884  |
| 0.03309225  | 0.060432289 | 0.09744526  | 0.1170944   | 0.1012011   | 0.041053584 |
| 0.162151775 | 0.0817592   | 0.08597807  | 0.01629018  | 0.1188906   | 0.1918956   |
| 0.02987553  | 0.1933670   | 0.02946483  | 0.08187893  | 0.1308018   | 0.07207585  |
| 0.2382999   | 0.200606521 | 0.03408082  | 0.6621770   | 0.09750595  | 0.1185995   |
| 0.1354263   | 0.3873112   | 0.2657767   | 0.01223486  | 0.07275107  | 0.04039764  |
| 0.1089664   | 0.1306438   | 0.1897060   | 0.1194623   | 0.1403849   | 0.07651423  |
| 0.08819673  | 0.2095170   | 0.3498809   | 0.2538008   | 0.0391174   | 0.08163656  |
| 0.04917312  | 0.1239778   | 0.02694976  | 0.3056950   | 0.03838397  | 0.0542557   |
| 0.05040348  | 0.2223544   | 0.07826762  | 0.1200638   | 0.04173551  | 0.05957685  |
| 0.2272104   | 0.2841311   | 0.2737663   | 0.1099236   | 0           | 0.01547142  |
| 0.07275085  | 0.3203027   | 0.01869676  | 0.2595791   | 0.1163680   | 0.023790368 |
| 0.0873936   | 0           | 0.0972872   | 0           | 0.03541901  | 0.111093578 |
| 0.01695556  | 0.213629917 | 0.06136097  | 0.07158424  | 1.3832750   | 0.1260722   |
| 0.1204136   | 0.09789548  | 0.04116383  | 0.02167064  | 0.06798262  | 0.05457369  |
| 0.2451424   | 0.119225077 | 0.04117286  | 0.4118402   | 0.1088769   | 0           |
| 0.1748491   | 0.1829576   | 0.09843076  | 0.1082887   | 0.5432991   |             |
| AC011472.4  | 1.3268543   | 0.78137     | 0.3488613   | 4.189542565 | 0.318454054 |
|             | 0.9826943   |             |             |             |             |
| 4.0429175   | 7.7249017   | 3.3547934   | 3.228881    | 5.476510    | 9.24808523  |
|             | 1.8683971   | 1.513072571 |             |             |             |
| 6.309837595 | 0.2433362   | 0.9005112   | 0.6375248   | 0.7032051   | 0.5552529   |
| 0.640174244 | 36.808310   | 6.643657    | 0.2954370   | 1.637860    | 0.3512298   |
|             | 0.2236157   |             |             |             |             |
| 0.3134705   | 0.3038098   | 0.125508375 | 0.7993961   | 0.508415152 | 0.5661647   |
| 0.5558218   | 0.4576091   | 0.393866989 | 0.5746384   | 0.6645631   | 0.0114091   |
|             | 0.040215    |             |             |             |             |
| 0.04993898  | 0           | 0.3598346   | 1.3453750   | 0.05869717  | 0.3251107   |
|             | 0.2271392   |             |             |             |             |
| 0.09574253  | 0.1234128   | 0.1476635   | 0.3797667   | 0.1789049   | 0.4305565   |
| 0.120052164 | 0.7136654   | 0.4395327   | 0.4055770   | 0.0932988   | 0.1619061   |
|             | 1.369352    |             |             |             |             |
| 1.1052630   | 2.642629    | 0.1966845   | 0.4173925   | 0.28737     | 0.936298969 |
|             | 1.566376    |             |             |             |             |
| 0.3068015   | 0.5750571   | 0.135980528 | 0.1854491   | 0.3197090   | 0.2964982   |
| 0.15191708  | 0.3916394   | 0.2595915   | 0.2755821   | 0.2063643   | 0.3818723   |
| 0.2872232   | 0.4605417   | 0.5972407   | 0.3354870   | 0.05121935  | 0           |
|             | 0.08584715  |             |             |             |             |
| 0.2947771   | 0.1893904   | 0.9777685   | 2.4723890   | 0.2625794   | 0.065586988 |
| 0.1369488   | 0.1084523   | 0.9433512   | 0.736782717 | 0.5989991   | 0.2527384   |
| 0.1258186   | 1.4293140   | 0.6386718   | 0.6049092   | 0.6583751   | 0.3088364   |
| 0.4340103   | 0.03320825  | 9.90680     | 7.69293376  | 0.1988206   | 0.5413590   |
|             | 0.6074186   |             |             |             |             |
| 0.1857564   | 0.5434153   | 0.3505871   | 0.1897246   | 0.09834863  | 0.2511712   |
| 0.5701955   | 0.7729942   | 0.1418297   | 0.2749705   | 0.2798654   | 0.2007566   |
| 0.5189937   | 0.4632282   | 0.3386747   | 3.54693     | 0.062738145 | 0.4737377   |
| 0.4566108   | 0.2029176   | 0.5819429   | 0.310710715 | 0.2784778   | 0.4204502   |
| 0.3080426   | 0.2281464   | 0.5897402   | 0.8224779   | 1.1998240   | 0.5482872   |
| 0.2600716   | 0.7412567   | 0.04553193  | 0.3952538   | 3.65448     | 1.4967620   |
|             | 0.3142647   |             |             |             |             |
| 0.3174287   | 0.1238081   | 0.1821607   | 0.6860802   | 0.161525221 | 0.5474499   |
| 0.3323017   | 0.612393225 | 0.2149217   | 0.4347433   | 1.1487721   | 5.602310    |
|             | 0.6688644   |             |             |             |             |
| 0.5519950   | 0.082516244 | 0.1559428   | 0.3061286   | 0           | 0.4632151   |
|             | 0.2677102   |             |             |             |             |
| 0.2870114   | 0.5029681   | 0.6775712   | 0.3767134   | 0.222271435 | 0.6033538   |
|             | 0           |             |             |             |             |

|             |             |             |             |             |             |            |
|-------------|-------------|-------------|-------------|-------------|-------------|------------|
| 0.5356564   | 0           | 0.3900068   | 0.4635257   | 0.9983510   | 0.3840567   | 0.3068496  |
| 1.0413770   | 0.5456617   | 2.6048540   | 0.6163407   | 0.3856469   | 0.4700207   | 0.2908407  |
| 0.9744509   | 1.3619760   | 0.125697898 | 0.6342332   | 0.3465871   | 0.4632530   | 0.5734159  |
| 0.6062379   | 0.03519033  | 0.19004923  | 2.17149     | 1.5516350   | 0.1206648   | 0.3231085  |
| 2.812587815 | 0.2087665   | 0.2268007   | 0.2843848   | 0.2839207   | 0.1994895   |            |
| 0.5142999   | 0           | 0.09222691  | 0.4671561   | 0.4524335   | 0.5054663   | 0.6828871  |
| 0.1837601   | 0.142109294 | 0.093810805 | 2.0542730   | 0.083763716 | 0.089954778 |            |
| 0.9001769   | 0.051799771 | 0.2540214   | 1.01149     | 2.4647280   | 0.105624143 | 1.465604   |
| 0.1705767   | 0.5570862   | 0.570995071 | 0.8621936   | 0.07446432  | 0.5309071   |            |
| 0.5717150   | 0.1838491   | 0.3533926   | 0.6824332   | 0.5201161   | 0.0219870   | 0.3967861  |
| 0.5062270   | 0.572044175 | 0.1470494   | 0.337226931 | 1.4160330   | 0.4567249   | 0.06136708 |
| 0.6603039   | 0.1579598   | 0.2606626   | 0.8804801   | 1.5393980   | 0.3337060   | 0.54257615 |
| 0.8739195   | 0.9032087   | 0.3188815   | 2.4539210   | 0.8624526   | 0.3039647   |            |
| 0.4405756   | 0.3712660   | 0.3222033   | 0.5094543   | 0.3398916   | 0.1333501   |            |
| 0.6007066   | 0.4329625   | 0.43844661  | 0.4102064   | 0.4301442   | 0.4648587   |            |
| 0.1694766   | 0.3071742   | 0.09604055  | 0.2995227   | 0.2628707   | 2.08487     |            |
| 0.2444643   | 0.085275239 | 0.371379365 | 0.8122153   | 0.3127783   | 2.685740    | 0.5651856  |
| 0.09663868  | 0.2905193   | 0.5647856   | 0.04388145  | 0.1736419   | 0.1737103   |            |
| 0.5884323   | 0.2434194   | 1.0611230   | 0.2519290   | 0.5287599   | 0           | 0.3243652  |
| 0.2817363   | 0.511736119 | 1.6280470   | 0.08873872  | 0.5894989   | 0.3449982   |            |
| 0.4252741   | 0.5244659   | 19.040160   | 0.06557982  | 0.6737239   | 0.3223668   |            |
| 0.4220133   | 0.260871422 | 2.6229250   | 0.2106157   | 0.09895061  | 0.3101321   |            |
| 0.3924346   | 0.202076111 | 0.3258811   | 0.03115864  | 0.4697347   | 0.3800502   |            |
| 0.5034770   | 0.8223993   | 0.278543204 | 0.3000434   | 0.9866802   | 0.4009560   | 0.08963889 |
| 0.163696425 | 0.3959334   | 0.1268721   | 0.8223880   | 0.444816835 | 0.087845972 |            |
| 0.1550261   | 0.02911172  | 0.04412615  | 0.6900980   | 0.2835265   | 0.3237022   |            |
| 0.9047186   | 0.1995327   | 0.4435803   | 0.5567735   | 0.05578172  | 0.2657927   |            |
| 0.217357778 | 0.04615834  | 5.5440931   | 0.05648     | 0.2891315   | 0.3668372   | 0.3631611  |
| 0.2964395   | 0.4639776   | 0.3284417   | 0.4377097   | 0.5534315   | 0.7470849   | 0          |
| 0.08089857  | 3.0421490   | 0.2072585   | 0.5801943   | 0.3972716   | 0.2707836   |            |
| 0.2946363   | 0.1059595   | 0.3685561   | 0.2657283   | 0.8879871   | 0.1439254   |            |
| 0.1460007   | 0.7176464   | 0.9357559   | 0.07348278  | 0.2047962   | 0.2635081   |            |
| 0.3180120   | 0.2927014   | 0           | 0.1936551   | 2.8311070   | 0.1184065   | 0.5234588  |
| 0.5582934   | 0.05723602  | 0.7124416   | 0.4004881   | 0.2627525   | 0.2283217   |            |
| 0.6583849   | 0.5712987   | 0.7092288   | 0           | 0.2663191   | 0.08357572  | 0.3513699  |
| 0.6463515   | 0.5436686   | 0.112847092 | 0.277985227 | 0.2296425   | 0.105213031 |            |
| 0.3878280   | 0.6301892   | 0           | 0.4203066   | 0.4151271   | 0.1767834   | 1.115028   |
| 0.5870052   | 0.3069141   | 0.2956538   | 0.2343640   | 0.574136599 | 1.2268      | 0.6507523  |
| 0.2949211   | 1.1850690   | 0.7995646   | 0.7442661   | 0.2168197   | 0.2666251   |            |
| 1.2221990   | 0.4682572   |             |             |             |             |            |
| AP001107.1  | 0.1272764   | 0.03270444  | 0.1165662   | 0.034004828 | 0.078404483 |            |
| 0.1975043   | 0.06069391  | 0.08320485  | 0.08435289  | 0.06911104  | 0.1411249   |            |
| 0.225883966 | 0.2262323   | 0.09883281  | 0.048668663 | 0.2909925   | 0.2667175   |            |
| 0.2242297   | 0.0883324   | 0.1901538   | 0.191387336 | 0.1747      | 0.3671960   | 0.3232782  |

|                    |                    |                   |                    |                     |                   |
|--------------------|--------------------|-------------------|--------------------|---------------------|-------------------|
| 0.3456401          | 0.2402055          | 0.1572999         | 0.2646086          | 0.1157604           | 0.183932104       |
| 0.1071097          | 0.195583685        | 0.1306797         | 0.3141855          | 0.2682498           | 0.075037398       |
| 0.3753496          | 0.1806169          | 0.3967778         | 0.3292771          | 0.06147574          | 0.146246          |
| 0.2531215          | 0.4045046          | 0.1754818         | 0.4573907          | 0.07323179          | 0.1262793         |
| 0.09766499         | 0.3375845          | 0.06678562        | 0.1483215          | 0.1325056           | 0.147786278       |
| 0.2259088          | 0.3091842          | 0.6339965         | 0.1421982          | 0.3986180.1720098   |                   |
| 0.6240335          | 0.1781472          | 0.1470026         | 0.1651556          | 0.1010735           | 0.164657161       |
| 0.06220117         | 0.6894122          | 0.1789211         | 0.103625085        | 0.1386052           | 0.1499304         |
| 0.2802635          | 0.195917896        | 0.2508965         | 0.1095640.1130821  | 0.2358924           |                   |
| 0.3357795          | 0.1515329          | 0.3644580.0919017 | 0.1011405          | 0.06755561          |                   |
| 0.102998123        | 0.1459381          | 0.1503342         | 0.3264             | 0.09006903          | 0.1718950.1649183 |
| 0.207613825        | 0.09633507         | 0.10013           | 0.3091723          | 0.207312501         | 0.2633493         |
| 0.04444647         | 0.2765801          | 0.1099693         | 0.08178593         | 0.1519577           | 0.2707831         |
| 0.2470007          | 0.1629355          | 0.1318339         | 0.18687826         | 1.9613780.085444815 |                   |
| 0.0582742          | 0.3427314          | 0.1445217         | 0.1960023          | 0.2866944           | 0.07192979        |
| 0.1167771          | 0.1470122          | 0.3091961         | 0.2673983          | 0.3171897           | 0.1371816         |
| 0.3062560.2296794  | 0.1664378          | 0.2834174         | 0.08960944         | 0.0297796           |                   |
| 0.2512373          | 0.143430366        | 0.1093461         | 0.1791294          | 0.2497950.08772021  |                   |
| 0.054641462        | 0.2658534          | 0.1386379         | 0.09480144         | 0.1203652           | 0.06382245        |
| 0.1687474          | 0.1166056          | 0.1542745         | 0.1880261          | 0.1380252           | 0.1121012         |
| 0.3315053          | 1.5157440.1780606  | 0.0947425         | 0.1339749          | 0.1306370.05606074  |                   |
| 0.06032689         | 0.293526192        | 0.2166172         | 0.3339340.16154284 | 0.1436250.1681983   |                   |
| 0.09697084         | 0.1981645          | 0.1357226         | 0.1132526          | 0.15962401          | 0.1005548         |
| 0.1615070.09292347 | 0.3855812          | 0.1804710.2235264 | 0.3213747          | 0.1340521           |                   |
| 0.1385199          | 0.21498711         | 0.3289272         | 0.09150392         | 0.2001757           | 0.1294275         |
| 0.4537257          | 0.08151544         | 0.4915949         | 0.2605116          | 0.1551420.07166197  |                   |
| 0.1507941          | 0.1880214          | 0.06967892        | 0.09325209         | 0.1653153           | 0.1841297         |
| 0.1285249          | 0.6632765          | 0.07368394        | 0.2402314          | 0.2167135           | 0.1086233         |
| 0.2890766          | 0.1476177          | 0.3341821         | 0.140372322        | 0.1374758           | 0.2563323         |
| 0.1697606          | 0.1591008          | 0                 | 0.1789788          | 0.1695116           | 0.3750885         |
| 0.2104928          | 0.5852296          | 0.08350488        | 0.1256972          | 0.1643078           | 0.1363968         |
| 0.4622338          | 0.1601230.09694795 | 0.324886684       | 0.230965428        | 0.5011075           |                   |
| 0.220959801        | 0.07118735         | 0.1206131         | 0.109313844        | 0.1861338           | 0.1778803         |
| 0.1311745          | 0.157887665        | 0.2362621         | 0.2939759          | 0.2632916           | 0.261078907       |
| 0.2274375          | 0.1964290.1292748  | 0.2924846         | 0.07544046         | 0.4194955           |                   |
| 0.1350140.4287534  | 0.04792699         | 0.1628168         | 0.2408908          | 0.216675758         |                   |
| 0.07758016         | 0.051891519        | 0.1960393         | 0.1706789          | 0.2320278           | 0.1645044         |
| 0.1851916          | 0.3798173          | 0.2032287         | 0.1052792          | 0.3185779           | 0.184018932       |
| 0.2497416          | 0.3737363          | 0.1380391         | 0.3109666          | 0.2148666           | 0.2138205         |
| 0.3013089          | 0.4243895          | 0.1493831         | 0.8242504          | 0.09392931          | 0.1876072         |
| 0.02641001         | 0.09898281         | 0.3148456         | 0.1751941          | 0.1664190.2452496   |                   |
| 0.1490204          | 0.1170423          | 0.1351172         | 0.1354473          | 0.1502421           | 0.2216919         |
| 0.2321536          | 0.344918795        | 0.083970805       | 0.2297794          | 0.06875627          | 0.1416199         |
| 0.3134712          | 0.2719174          | 0.08028523        | 0.07548545         | 0.06945278          | 0.2137561         |

|             |             |             |             |             |             |
|-------------|-------------|-------------|-------------|-------------|-------------|
| 0.07637156  | 0.4045185   | 0.1337739   | 0.2414936   | 0.2953608   | 0.3881217   |
| 0.06626784  | 0.3251435   | 0.1415601   | 0.173064824 | 0.4918620   | 0.1482528   |
| 0.1399532   | 0.03466928  | 0.01869713  | 0.05380221  | 0.1614981   | 0.06919705  |
| 0.3949360   | 0.2078681   | 0.4664949   | 0.108957266 | 0.04855437  | 0.1851940   |
| 0.08700707  |             |             |             |             |             |
| 0.09544447  | 0.2530491   | 0.172608401 | 0.06686087  | 0.2520591   | 0.5369478   |
| 0.08593134  | 0.1272781   | 0.2781285   | 0.174944629 | 0.1253181   | 0.8675859   |
| 0.1339727   | 0.2364579   | 0.207270631 | 0.0580239   | 0.07809089  | 0.09641655  |
| 0.293344913 | 0.146761295 | 0.1129460   | 0.2355005   | 0.07760007  | 0.1779952   |
| 0.1329623   | 0.2703992   | 0.2930853   | 0.1333410   | 0.2275229   | 0.1602229   |
| 0.09319263  | 0.3071631   | 0.076448903 | 0.1298782   | 2.7959040   | 0.1950817   |
| 0.1412404   | 0.1146877   | 0.2128846   | 0.3872644   | 0.1748463   | 0.2772462   |
| 0.2020605   | 0.2011409   | 0.1936157   | 0.2711057   | 0.1422679   | 0.1719614   |
| 0.1731299   | 0.2040655   | 0.0798446   | 0.5635020   | 0.4490601   | 0.1211210   |
| 0.2138866   |             |             |             |             |             |
| 0.05607706  | 0.06246442  | 0.08436887  | 0.1925672   | 0.1359131   | 0.04571157  |
| 0.2326077   | 0.2941256   | 0.4303040   | 0.2889482   | 0.4175142   | 0.1855576   |
| 0.1248724   | 0.1515279   | 0.5413960   | 0.5369890   | 0.04581792  | 0.06039302  |
| 0.390609    |             |             |             |             |             |
| 0.1126875   | 0.1328467   | 0.1606103   | 0.6412614   | 0.2936767   | 0.1940162   |
| 0.192657669 | 0.09366954  | 0.1763711   | 0.3398548   | 0.06820027  | 0.1181057   |
| 0.191837362 | 0.090788974 | 0.1050006   | 0.092513607 | 0.1364066   | 0.5114991   |
| 1.4496640   | 0.2633220   | 0.07300409  | 0.1165840   | 0.3268141   | 0.05161525  |
| 0.1259388   |             |             |             |             |             |
| 0.1949758   | 0.2198142   | 0.113588361 | 0.4314892   | 0.4822872   | 0.06915295  |
| 0.05789051  | 0.35434     | 0.2974690   | 0.2396732   | 0.5235891   | 0.0859742   |
| 0.2529245   |             |             |             |             |             |
| MIR497HG    | 0.3853849   | 1.10118     | 0.2050854   | 0.971984612 | 0.154651633 |
| 0.5561683   |             |             |             |             |             |
| 1.4492151   | 1.4390761   | 1.8049341   | 0.0011180   | 0.2710412   | 0.636905771 |
| 0.5597568   |             |             |             |             |             |
| 0.972363198 | 1.994741256 | 0.1243916   | 0.3634217   | 0.8221509   | 0.2910018   |
| 0.02240849  | 0.155444704 | 0.1737283   | 0.07681846  | 0.03775626  | 0.05232883  |
| 0.1296720   | 0.1265581   | 0.08012181  | 0.1423631   | 0.10693148  | 0.7102638   |
| 0.040609032 | 0.1808868   | 0.05073781  | 0.1299590   | 0.062919278 | 0.1258931   |
| 0.1389761   | 0.1093705   | 0.3855184   | 0.1212599   | 0.0506084   | 0.1471557   |
| 0.4048821   | 0.04500829  | 0.1090648   | 0.1403017   | 0.4343676   | 0.05914468  |
| 0.1604043   | 0.1024595   | 0.1273834   | 0.1238046   | 0.061369717 | 0.145928    |
| 0.07659737  | 0.1785322   | 0.03577021  | 0.1158711   | 0.3625010   | 0.1115135   |
| 0.1125743   | 0.04398781  | 0.1333548   | 0.02448354  | 0.161889094 | 1.259196    |
| 0.01742606  | 0.03957217  | 0.405487659 | 0.04740004  | 0.09533576  | 0.08052025  |
| 0.232976428 | 0.3932559   | 0.1857816   | 0.04108866  | 0.07252562  | 0.1518301   |
| 0.07341311  | 0.2471965   | 0.12403     | 0.2572475   | 0.05563872  | 0.052394464 |
| 0.05851251  | 0.07157667  | 0.1500631   | 0.2380131   | 0.09552473  | 0.05752651  |
| 0.121537366 | 0.04375448  | 0.03464999  | 0.2575566   | 0.075327499 | 0.2985485   |
| 0.1744171   | 0.0964762   | 0.1883717   | 0.06735879  | 0.2112543   | 0.302197    |
| 0.1234039   | 0.0526249   | 0.2218627   | 0.063658751 | 0.3945145   | 0.160407333 |
| 0.2710281   | 0.1314508   | 0.2191818   | 0.06330481  | 1.0147040   | 0.08214129  |
| 0.04849286  | 0.2765127   | 0.06419837  | 0.1991776   | 0.1053729   | 0.09062775  |
| 0.0644246   | 0.1669091   | 0.2052504   | 0.1815248   | 0.2604785   | 0.1136151   |
| 0.7932585   | 0.104231541 | 0.1135176   | 0.2603484   | 0.2506805   | 0.2496746   |

|             |             |             |             |             |             |
|-------------|-------------|-------------|-------------|-------------|-------------|
| 0.307738664 | 0.08134609  | 0.2283640   | 0.3149379   | 0.06803221  | 0.1275452   |
| 0.1401481   | 0.3147406   | 0.2312310   | 0.05170143  | 0.1281657   | 0.06982668  |
| 0.08548296  | 0.1938637   | 0.1575274   | 0.1262247   | 0.3326474   | 0.05142288  |
| 0.3317369   | 0.1565709   | 0.027523472 | 0.06996302  | 0.2972725   | 0.14185104  |
| 0.1153596   | 0.3889153   | 0.1115762   | 0.3212466   | 0.1775344   | 0.1058158   |
| 0.089636009 | 0.04650142  | 0.07824527  | 0.06077514  | 0.0749841   | 0.3079155   |
| 0.3720348   | 0.1028453   | 0.08118024  | 0.4114058   | 0.049710237 | 0.3084297   |
| 0.04654744  | 0.09412676  | 0.07837969  | 0.0498421   | 0.2073318   | 0.1224838   |
| 0.04908168  | 0.2745034   | 0.1446586   | 0.4034638   | 0.6185888   | 0.4332192   |
| 0.04312429  | 0.2125473   | 0.1709768   | 0.03113322  | 0.1338906   | 0.053546476 |
| 0.1496377   | 0.3051306   | 0.1315618   | 0.2540422   | 0.5065739   | 0.06296157  |
| 0.102009246 | 0.1054546   | 0.1021524   | 0.02698627  | 0.1156193   | 1.606261617 |
| 0.1700847   | 0.2173851   | 0.1574899   | 0.07660063  | 0.04588985  | 0.1237205   |
| 0.03861671  | 0.04125246  | 0.03316757  | 0.2725805   | 0.0322988   | 0.6940171   |
| 0.1056788   | 0.036322573 | 0.05195162  | 0.0931565   | 0.096343534 | 0.057480213 |
| 0.4163382   | 0.046339358 | 0.05410573  | 0.6919557   | 0.1740720   | 0.11473773  |
| 0.2497350   | 0.07411782  | 0.1067918   | 0.138646877 | 0.06427554  | 0.09516393  |
| 1.0647060   | 0.08634841  | 0.02349555  | 0.1354886   | 0.04360681  | 0.1578658   |
| 1.7588530   | 0.1014170   | 0.2207235   | 0.213694795 | 0.1409447   | 0.123903687 |
| 0.604504    | 0.2225301   | 0.05097684  | 0.3445742   | 0.04710287  | 0.0713832   |
| 0.1265891   | 1.10935     | 0.1218485   | 0.495286848 | 0.1489136   | 0.08147879  |
| 0.1912229   | 0.07840155  | 0.1974770   | 0.09711523  | 0.2877795   | 0.20165     |
| 0.1347609   | 0.08687494  | 0.09657066  | 0.4414224   | 0.1770616   | 0.107395835 |
| 0.1610153   | 0.08795452  | 0.1881254   | 0.1985387   | 0.1570250   | 0.05523206  |
| 0.09296186  | 0.05039153  | 0.2106752   | 0.1437135   | 0.065388041 | 0.081362654 |
| 0.1805209   | 0.1798759   | 0.9686197   | 0.2000204   | 0.1543779   | 0.2970223   |
| 0.1299213   | 0.1289832   | 0.09431212  | 0.7658943   | 0.2734563   | 0.01166569  |
| 0.08774727  | 0.2468362   | 0.06463644  | 0.1805893   | 0.2528647   | 0.07715431  |
| 0.186135227 | 0.1813867   | 0.05670316  | 0.2260104   | 0.1196731   | 0.06114283  |
| 0.3574704   | 0.3207881   | 0.3603818   | 0.1243675   | 0.08926198  | 0.07704638  |
| 0.045840921 | 0.8879981   | 0.04486046  | 0.0821970   | 0.1783542   | 0.1671745   |
| 0.125435361 | 0.09023508  | 0.03982013  | 0.2572764   | 0.1595861   | 0.7680989   |
| 0.08893162  | 0.147474406 | 0.2252766   | 0.5903575   | 0.1229793   | 0.4467713   |
| 0.062760238 | 0.3879295   | 0.1297121   | 0.3713518   | 0.113693423 | 0.028066354 |
| 0.1358539   | 0.04836546  | 0.1071455   | 0.1469886   | 0.04831217  | 0.09307913  |
| 0.03651197  | 0.08159963  | 0.1606180   | 0.1293719   | 0.03920836  | 0.1843966   |
| 0.106481927 | 0.08258522  | 0.06251683  | 0.1890225   | 0.09032329  | 0.1510612   |
| 0.3558197   | 0.1190652   | 0.2287109   | 0.05036904  | 0.09089995  | 0.1556004   |
| 0.1256263   | 0.04249317  | 0.1447415   | 0.08331014  | 0.03641994  | 0.1003175   |
| 0.06527639  | 0.1326548   | 0.1160996   | 0.1624970   | 0.08478133  | 0.09508676  |
| 0.1021347   | 0.06744239  | 0.09795768  | 1.3898170   | 0.01328753  | 0.06573667  |
| 0.09160394  | 0.07697329  | 0.08805616  | 0.1288452   | 0.05297506  | 0.02887353  |
| 0.7629468   | 0.1815854   | 0.03902325  | 0.06183562  | 0.1097197   | 0.02677901  |
| 0.1330721   | 0.09654036  | 0.08753719  | 0.3365612   | 0.3088920   | 0.09063804  |
| 0.164712071 |             |             |             |             |             |



|             |             |             |             |             |             |             |             |
|-------------|-------------|-------------|-------------|-------------|-------------|-------------|-------------|
|             | 0.1966470   | 0.1495314   | 0.2469741   | 0.4047520   | 0.2247875   | 0.120180293 | 0.162404398 |
|             | 0.1936959   | 0.053784069 | 0.08496626  | 0.2973671   | 0           | 0.1275716   | 0.1250521   |
|             | 0.06212957  | 0.1044989   | 0.4276032   | 0.1359731   | 0.1889199   | 0.04492688  |             |
|             | 0.082545212 | 0.3848301   | 0.07128416  | 0.1381979   | 0.3617961   | 0.2084529   |             |
|             | 0.05188131  | 0.07125204  | 0.07382734  | 0.6872565   | 0.1538803   |             |             |
| MAP3K20-AS1 | 0.04370561  | 0.2395823   | 0.03370762  | 0.342524198 | 0.046154427 |             |             |
|             | 0.1431782   | 0.2064327   | 0.1447639   | 0.2488934   | 0.5315996   | 0.1292295   |             |
|             | 0.14892784  | 0.08878422  | 0.139234153 | 0.169352261 | 0.05486039  | 0.04579424  |             |
|             | 0.1959963   | 0.04853212  | 0.05647322  | 0.072163951 | 0.05893798  | 0.1528387   |             |
|             | 0.06872104  | 0.05275103  | 0.1508288   | 0.06687621  | 0.01514405  | 0.07338667  |             |
|             | 0.067371392 | 0.1348620   | 0.061405011 | 0.05128488  | 0.03836038  | 0.06550375  |             |
|             | 0.026427885 | 0.03304918  | 0.1070188   | 0.03758622  | 0.3350249   | 0.2814698   |             |
|             | 1.9131270   | 0.02317859  | 0.1537547   | 0.02835714  | 0.006544332 | 0.3413917   |             |
|             | 0.03854508  | 0.02484245  | 0.0118896   | 0.02038542  | 0.02469445  | 0.008666909 |             |
|             | 0.006444256 | 0.03064696  | 0.06434615  | 0.06531266  | 0.2353839   | 0.08343281  |             |
|             | 0.03150222  | 0.2810330   | 0.04255595  | 0.1187751   | 0.07561731  | 0.07712838  |             |
|             | 0.124170299 | 0.06509513  | 0.03293748  | 0           | 0.145985437 | 0.02239804  | 0.05148479  |
|             | 0.05371538  | 0.260951259 | 0.06757308  | 0.05852516  | 0.1849115   | 0.02492413  |             |
|             | 0.1298235   | 0.02775203  | 0.04449839  | 0           | 0.2006666   | 0.2433213   | 0.056589851 |
|             | 0.2810985   | 0.07595176  | 0.2988878   | 0.04498752  | 0.1435173   | 0.01208139  |             |
|             | 0.095057035 | 0.03859406  | 0.06549291  | 0.01381035  | 0.11864884  | 0.1639831   |             |
|             | 0.08140017  | 0.1620910   | 0.1007      | 1.11839     | 0.08469952  | 0.0974124   | 0.02827263  |
|             | 0.02762994  | 0.05083016  | 0.042781576 | 1.3149680   | 0.345571827 | 0.05336227  |             |
|             | 0.04358925  | 0.03452347  | 0.02991355  | 0.1312645   | 0.04704774  | 0.053467    |             |
|             | 0.3801050   | 0.03370643  | 0.1163082   | 0.05809077  | 0.06851921  | 0.05904035  |             |
|             | 0.03755709  | 0.05542136  | 0.08797566  | 0.05221762  | 0.02726948  | 0.08726434  |             |
|             | 0.111134379 | 0.05721676  | 0.02828114  | 0.1143699   | 0.06024471  | 0.075053605 |             |
|             | 0.3587605   | 0.05924431  | 0.2604319   | 0.08572639  | 0.1534125   | 0.04414963  |             |
|             | 0.08643846  | 0.05297652  | 0.004653444 | 0.06319552  | 0.1759752   | 0.01958469  |             |
|             | 5.0078380   | 0.007089212 | 0.02168917  | 0.06134109  | 0.0149532   | 0.06600264  |             |
|             | 0.02367512  | 0.104045764 | 0.1432590   | 0.05351268  | 0.419124815 | 0.2976478   |             |
|             | 0.1820247   | 0.02219929  | 0.05583422  | 0.0414275   | 0.2370435   | 0.079728716 |             |
|             | 0.01674165  | 0.05751417  | 0.06807277  | 0.03481076  | 0.05748144  | 0.05942479  |             |
|             | 0.02699872  | 0.08865482  | 0.1489040   | 0.626391376 | 0.1263105   | 0.1005493   |             |
|             | 0.2264330   | 0.1119338   | 0.07246765  | 0.2052724   | 0.0192925   | 0.0265059   |             |
|             | 0.0555907   | 0.1093693   | 0.1380836   | 0.2316511   | 0.02126856  | 0.06210319  |             |
|             | 0.1397362   | 0.09367188  | 0.4629201   | 0.06748544  | 0.047231188 | 0.03928255  |             |
|             | 0.1488351   | 0.04144478  | 0.04924844  | 0.03003888  | 0.2890132   | 0.532524301 |             |
|             | 0.04895644  | 0.1514362   | 0.1263043   | 0.07284511  | 0.297234677 | 0.4286424   |             |
|             | 0.2100082   | 0.06869446  | 0.04572157  | 0.01285003  | 0.004871824 | 0.07646626  |             |
|             | 0.02970378  | 0.008358793 | 0.08326659  | 0.008139848 | 0.03665656  | 0.04438811  |             |
|             | 0.160193389 | 0.276960839 | 0           | 0.276524657 | 0.057943976 | 0.0414175   | 0.083416489 |
|             | 0.02727113  | 0.1533052   | 0.09400522  | 0.26364465  | 0.06883786  | 0.5823439   |             |
|             | 0.01682084  | 0.119536292 | 0.1272742   | 0.08394027  | 0.1841439   | 0.07951234  |             |

|             |             |             |             |             |             |
|-------------|-------------|-------------|-------------|-------------|-------------|
| 0.07895039  | 0.1849545   | 0.09615952  | 0.02617425  | 0.2304079   | 0.021299    |
| 0.009590703 | 0.035430745 | 0.1420819   | 0.101823399 | 0.1407011   | 0.055162    |
| 0.3359994   | 0.06202756  | 0.05087455  | 0           | 0.01772367  | 0.08263304  |
| 0.05373882  |             |             |             |             |             |
| 0.081133476 | 0.02345547  | 0.04277926  | 0.05530164  | 0.01162266  | 0.09837777  |
| 0           |             |             |             |             |             |
| 0.04729914  | 0.1943089   | 0.08962208  | 0           | 0.04691564  | 0.06442267  |
| 0.2176552   |             |             |             |             |             |
| 0.3974196   | 0.058838222 | 0.06133973  | 0.02770755  | 0.07485917  | 0.0181946   |
| 0.04946623  | 0.0618641   | 0.1584834   | 0.03704028  | 0.07027115  | 0.06298825  |
| 0.130457971 | 0.111067539 | 0.0796151   | 0.1636981   | 0.1830815   | 0.08401427  |
| 0.2334352   | 0.06683454  | 0.1382456   | 0.9751786   | 0.2726360   | 0.05594737  |
| 0.09475902  | 0.3429946   | 0.1809312   | 0.05409298  | 0.1036604   | 0.2199727   |
| 0.08357536  | 0.09722101  | 0.158477202 | 0.03361216  | 0.05001557  | 0.04271885  |
| 0.06349402  | 0.1540904   | 0.04222905  | 0.2070397   | 0.04224295  | 0.02410979  |
| 0.05191279  | 0.04368826  | 0.063014694 | 0.2148983   | 0.3843904   | 0.1035752   |
| 0.4806971   | 0.09830528  | 0.158059251 | 0.07871808  | 1.2042420   | 0.04322536  |
| 0.3934409   | 0.06587597  | 0.03056221  | 0.185830327 | 0.1207948   | 0.06500104  |
| 0.03874111  | 0.06255221  | 0.115988769 | 0.02125323  | 0.1021552   | 0.1765792   |
| 0.080585667 | 0.091951597 | 0.3138438   | 0.5297493   | 0.03552958  | 0.07408727  |
| 0.05326778  | 0.2997351   | 0.03067213  | 0.4884069   | 0.4643118   | 0.04075491  |
| 0.02694866  | 0.04280231  | 0.02333501  | 1.21904     | 1.5492720   | 0.1446120   |
| 0.04138729  |             |             |             |             |             |
| 0.1050207   | 0.05848216  | 0.0136393   | 0.2134780   | 0.03173464  | 0.05286539  |
| 0.01188302  | 0.006331993 | 0.03894183  | 0.01302762  | 0.1574668   | 0.1335047   |
| 0.08244036  | 0.1827863   | 0.02180301  | 0.3400381   | 0.1109117   | 0.01780528  |
| 0.1283758   | 0           | 0.3322069   | 0.09404573  | 0.1066774   | 0.4102138   |
| 0.1301674   |             |             |             |             |             |
| 0.03847626  | 0.006062056 | 0.03414101  | 0.03142372  | 0.1153008   | 0.1663228   |
| 0.1982223   | 0.05720328  | 0.02809864  | 0.1798111   | 0.1659075   | 0.03374383  |
| 0.3611617   | 0.04760182  | 0.08824346  | 0.01631138  | 0.007076915 | 0.03807055  |
| 0.18679613  | 0.1191308   | 0.07402304  | 0.07072919  | 0.03122584  | 0.07725038  |
| 0.03634498  | 0.409286781 | 0.04437697  | 0.059300949 | 0.03568824  | 0.03903208  |
| 1.9308680   | 0.03384233  | 0.1432512   | 0.1067571   | 0.1436481   | 0.1606996   |
| 0.04612938  | 0.1190276   | 0.01887057  | 0.242699347 | 0.06285984  | 0.02245603  |
| 0.07123956  | 0.1802371   | 0.07725541  | 0.09806232  | 0.1047476   | 0.0500924   |
| 0.1102184   | 0.02693088  |             |             |             |             |
| ENTPD1-AS1  | 0.09809535  | 0.2089381   | 0.1791116   | 0.255137545 | 0.053667947 |
| 0.1412179   | 0.1198043   | 0.1464905   | 0.2214099   | 0.1571018   | 0.07413497  |
| 0.100681359 | 0.1596580   | 0.086409529 | 0.173541387 | 0.08010983  | 0.1263119   |
| 0.06132929  | 0.06299465  | 0.06757546  | 0.067742576 | 0.07172011  | 0.06571485  |
| 0.06818643  | 0.08665834  | 0.1453022   | 0.1464839   | 0.1265417   | 0.1448682   |
| 0.067225657 | 0.1104013   | 0.125782327 | 0.03744435  | 0.0949155   | 0.117572    |
| 0.034732164 | 0.2187788   | 0.07813707  | 0.1311147   | 0.1386123   | 0.0939465   |
| 0.06208093  | 0.1776942   | 0.1292692   | 0.07131463  | 0.1226399   | 0.06379829  |
| 0.1388374   | 0.1729164   | 0.2112349   | 0.06615065  | 0.07612677  | 0.109684    |
| 0.067439904 | 0.0372935   | 0.1644324   | 0.09713892  | 0.0865392   | 0.08629815  |
| 0.1111693   | 0.09803478  | 0.1104752   | 0.08093925  | 0.06952377  | 0.1332749   |
| 0.064756986 | 0.03366535  | 0.1108901   | 0.1040204   | 0.046187937 | 0.1108394   |

|             |             |             |             |             |             |
|-------------|-------------|-------------|-------------|-------------|-------------|
| 0.05847381  | 0.1118465   | 0.166711049 | 0.1074445   | 0.07528735  | 0.1494093   |
| 0.1556916   | 0.07815796  | 0.04727903  | 0.1570319   | 0.09362874  | 0.1164579   |
| 0.2418916   | 0.075749003 | 0.1289740   | 0.07162839  | 0.1514216   | 0.05474415  |
| 0.2377391   | 0.1102614   | 0.086111715 | 0.05769877  | 0.04675535  | 0.1193188   |
| 0.080853199 | 0.1103377   | 0.03565935  | 0.07889773  | 0.05076627  | 0.08505876  |
| 0.05006192  | 0.08836517  | 0.1066531   | 0.02958751  | 0.1175224   | 0.169194338 |
| 1.3620790   | 0.077756055 | 0.08311701  | 0.07213799  | 0.1526390   | 0.03882776  |
| 0.2472893   | 0.08473175  | 0.1747396   | 0.03661775  | 0.1132055   | 0.08342963  |
| 0.07876792  | 0.06114479  | 0.06645633  | 0.1133416   | 0.3023597   | 0.1059848   |
| 0.1198226   | 0.04147941  | 0.1390120   | 0.081141936 | 0.06266304  | 0.1156330   |
| 0.06759869  | 0.048709758 | 0.1387658   | 0.1277074   | 0.04527327  | 0.08494485  |
| 0.05156026  | 0.04835209  | 0.04331136  | 0.04942375  | 0.1053254   | 0.04272277  |
| 0.1070698   | 0.2430875   | 2.5402550   | 0.04658407  | 0.04574784  | 0.07713254  |
| 0.05337542  | 0.04105087  | 0.09219085  | 0.137161489 | 0.04022957  | 0.06883924  |
| 0.088503848 | 0.09770976  | 0.04770794  | 0.1008513   | 0.1002162   | 0.09679116  |
| 0.09014127  | 0.108338797 | 0.1038996   | 0.07798608  | 0.07041059  | 0.06535592  |
| 0.03497384  | 0.1462319   | 0.07293599  | 0.04481243  | 0.2080414   | 0.165514864 |
| 0.08749304  | 0.1835337   | 0.1246492   | 0.07211081  | 0.09053558  | 0.0711525   |
| 0.1612056   | 0.0838613   | 0.2059472   | 0.0780787   | 0.08096011  | 0.2140842   |
| 0.06901644  | 0.03778588  | 0.1742924   | 0.07295161  | 0.0821104   | 0.1621895   |
| 0.096885441 | 0.1453179   | 0.1403630   | 0.1351606   | 0.05843093  | 0.09503921  |
| 0.08688877  | 0.086402011 | 0.1140413   | 0.0884538   | 0.07211911  | 0.09370867  |
| 0.075784177 | 0.1442081   | 0.07111055  | 0.1839035   | 0.1446572   | 0.1047670   |
| 0.07706916  | 0.08628256  | 0.08042433  | 0.1139219   | 0.1266562   | 0.1030138   |
| 0.08666391  | 0.07382015  | 0.097467601 | 0.096818522 | 0.07272005  | 0.11654242  |
| 0.074036057 | 0.07391983  | 0.079175752 | 0.1028752   | 0.1982127   | 0.08261683  |
| 0.089002336 | 0.06222693  | 0.04813399  | 0.0818754   | 0.05370854  | 0.09011006  |
| 0.03210263  | 0.1472525   | 0.1700878   | 0.1032781   | 0.1436962   | 0.06017865  |
| 0.122307    | 0.05073497  | 0.07127507  | 0.1283775   | 0.075881977 | 0.09509266  |
| 0.133818769 | 0.1369724   | 0.2058507   | 0.1382939   | 0.04528784  | 0.1960418   |
| 0.06567392  | 0.07548617  | 0.07373961  | 0.2821257   | 0.113918347 | 0.09989827  |
| 0.08537345  | 0.1788128   | 0.08344559  | 0.08168677  | 0.06552177  | 0.1247070   |
| 0.09821747  | 0.1446464   | 0.1078199   | 0.1141809   | 0.1271729   | 0.04708604  |
| 0.07635941  | 0.063006868 | 0.05856584  | 0.08766317  | 0.1047583   | 0.06310053  |
| 0.1665372   | 0.06022466  | 0.05869479  | 0.1480982   | 0.2546332   | 0.07473256  |
| 0.145382439 | 0.118520734 | 0.1439383   | 0.07968     | 0.1837994   | 0.05793305  |
| 0.07574967  | 0.1886838   | 0.08942618  | 0.05331415  | 0.2603069   | 0.09190922  |
| 0.1027306   | 0.1001715   | 0.07828283  | 0.1250663   | 0.2883237   | 0.05722795  |
| 0.09025937  | 0.08044791  | 0.092566473 | 0.0670789   | 0.09216346  | 0.09241505  |
| 0.03863212  | 0.03125143  | 0.04110996  | 0.2927317   | 0.1901961   | 0.1525606   |
| 0.05053706  | 0.1193217   | 0.088183099 | 0.07033562  | 0.08529646  | 0.1337942   |
| 0.05925446  | 0.08373761  | 0.095037711 | 0.1192053   | 0.1257811   | 0.1814694   |
| 0.08724219  | 0.07522968  | 0.04462843  | 0.06394081  | 0.1102440   | 0.1300724   |
| 0.04714306  | 0.1030523   | 0.089818744 | 0.07500127  | 0.04475159  | 0.07735488  |
| 0.102420958 |             |             |             |             |             |

|             |             |             |             |             |             |
|-------------|-------------|-------------|-------------|-------------|-------------|
| 0.125665037 | 0.07290979  | 0.09812192  | 0.05361144  | 0.04688054  | 0.1055643   |
| 0.06343303  | 0.07651446  | 0.09853361  | 0.1216943   | 0.03570739  | 0.03935176  |
| 0.2366148   | 0.053951967 | 0.1013066   | 0.9234623   | 0.08281157  | 0.08813547  |
| 0.1261995   | 0.1850301   | 0.05975034  | 0.0623462   | 0.08753202  | 0.06861923  |
| 0.05350251  | 0.03082096  | 0.3009094   | 0.1521885   | 0.08090509  | 0.06599871  |
| 0.1939511   | 0.05783125  | 0.1149699   | 0.08468129  | 0.07890299  | 0.07366709  |
| 0.02499475  | 0.03132196  | 0.1090546   | 0.1630796   | 0.05408875  | 0.07131122  |
| 0.08927852  | 0.04146982  | 0.05606338  | 0.08724515  | 0.1695250   | 0.1092914   |
| 0.1277611   | 0.2050298   | 0.05336705  | 0.1230930   | 0.05688995  | 0.05608015  |
| 0.1691754   | 0.09574568  | 0.1506061   | 0.1216987   | 0.07741068  | 0.04478092  |
| 0.1111850   | 0.128807522 | 0.1217724   | 0.06223483  | 0.06541208  | 0.02279875  |
| 0.1027777   | 0.10319696  | 0.099610105 | 0.05400119  | 0.105150044 | 0.09554183  |
| 0.1082934   | 0.6461464   | 0.06383188  | 0.08483512  | 0.1403028   | 0.08011746  |
| 0.04601206  | 0.03688783  | 0.09704385  | 0.08113631  | 0.071724111 | 0.04371001  |
| 0.0819785   | 0.06935167  | 0.03870457  | 0.07646156  | 0.04640592  | 0.1068275   |
| 0.1027547   | 0.08622125  | 0.09831447  |             |             |             |
| ARAP1-AS2   | 0.1461167   | 0           | 0.05634569  | 0.034700833 | 0.01714484  |
|             | 0.07963223  | 0.07641709  | 0.01434657  | 0.01410512  | 0.09258003  |
|             | 0.2143726   | 0.03491159  | 0.014899441 | 0.2751140   | 0.1020662   |
|             | 0.1258676   | 0.034465521 | 0.07037199  | 0.2640014   | 0           |
|             | 0.08599256  | 0.3290924   | 0.1635643   | 0.090094462 | 0.0819765   |
|             | 0.009525317 | 0.2885546   | 0.08212209  | 0.035341501 | 0.1657351   |
|             | 0.1675444   | 0.08400419  | 0.13443     | 0.07461965  | 0.1743541   |
|             | 0.1422055   | 0.2953668   | 0.07133383  | 0.06443199  | 0.09966398  |
|             | 0.1590227   | 0.2201561   | 0.05795045  | 0.043088898 | 0.03842212  |
|             | 0.09704596  | 0.04185829  | 0.1568997   | 0.0921535   | 0.2505467   |
|             | 0.05294522  | 0.02808933  | 0.03867836  | 0.118607532 | 0.02720327  |
|             | 0.2143368   | 0.097611754 | 0.09984154  | 0.05737468  | 0.2294651   |
|             | 0.1280159   | 0.05590326  | 0.04945571  | 0.1388773   | 0.3654957   |
|             | 0.2107534   | 0.1406741   | 0.03870398  | 0           | 0           |
|             | 0.1019635   | 0.01253353  | 0.04643295  | 0.05048813  | 0.132414519 |
|             | 0.0437912   | 0.1962259   | 0.158666804 | 0.04837311  | 0.01360686  |
|             | 0.04809436  | 0.0918059   | 0.06067877  | 0.0592126   | 0.2126725   |
|             | 0.1168306   | 0.080452935 | 4.7178760   | 0.043596843 | 0.05352025  |
|             | 0.1442737   | 0.3000211   | 0.1219010   | 0.01572901  | 0           |
|             | 0.04161625  | 0.07635785  | 0.1480379   | 0.2636780   | 0.04632119  |
|             | 0.01246958  | 0           | 0.09282709  | 0.016888393 | 0.08767329  |
|             | 0.03356837  | 0           | 0.1606351   | 0.08488529  | 0.02073039  |
|             | 0.1107008   | 0.05949613  | 0.08855559  | 0.1322379   | 0.04695008  |
|             | 8.6680860   | 0.01208521  | 0.08544819  | 0.01666386  | 0           |
|             | 0.3315764   | 0.05111534  | 0.21636467  | 0.03471268  | 0.09362234  |
|             | 0.05833283  | 0.1108004   | 0.1485908   | 0.144380808 | 0.08395605  |
|             | 0.04267144  | 0.1330050   | 0.02402151  | 0.1434832   | 0.08123596  |
|             | 0.1290634   | 0.179498807 | 0.03248319  | 0.01400652  | 0.1802407   |
|             |             |             |             |             | 0.03301916  |

|             |             |             |             |             |             |             |
|-------------|-------------|-------------|-------------|-------------|-------------|-------------|
| 0.2745772   | 0.02079597  | 0.2579949   | 0.1476910   | 0.1961760   | 0.08531686  | 0.01049185  |
| 0.1046563   | 0.08295594  | 0.06488234  | 0.09732633  | 0.2192148   | 0.01311555  |             |
| 0.4653359   | 0.045115254 | 0.1969943   | 0.02073273  | 0           | 0.1337761   | 0.07531954  |
| 0.1515654   | 0.07162272  | 0.09352644  | 0.02531408  | 0.0812040   | 0.06958169  | 0           |
| 0.05619756  | 0.06105215  | 0.1658652   | 0.1868245   | 0.1074006   | 0.3908998   |             |
| 0.05810048  | 0.08689251  | 0.1257531   | 0.01739856  | 0.2313118   | 0.1050431   |             |
| 0.04946613  | 0.095635503 | 0.033670399 | 0.5886633   | 0.101467067 | 0.048429601 |             |
| 0.01153892  | 0.111551261 | 0.2165356   | 0.3043148   | 0.1222194   | 0.042649222 |             |
| 0.2137004   | 0.1102015   | 0.1124709   | 0.061482145 | 0.1160463   | 0.08017978  |             |
| 0.1758943   | 0.1469037   | 0.01649669  | 0.8561634   | 0.1837032   | 0.3325221   |             |
| 0.07336192  | 0.1691163   | 0.1923819   | 0.130297343 | 0.1385441   | 0.056736028 |             |
| 0.1378735   | 0.06915664  | 0.1238949   | 0.01481219  | 0.1275629   | 0.1002391   |             |
| 0.01481345  | 0.04604315  | 0.2438239   | 0.073027656 | 0.1372287   | 0.1001138   |             |
| 0.0660302   | 0.3011411   | 0.06771403  | 0.03068394  | 0.2503734   | 0.1499109   |             |
| 0.08673346  | 0.1508532   | 0           | 0.0837581   | 0           | 0.06992915  | 0.147531034 |
| 0.2129584   | 0.06947395  | 0.06256732  | 0.08363879  | 0.1378130   | 0.02585302  |             |
| 0.0345549   | 0.1326783   | 0.3523959   | 0.06580701  | 0.241028781 | 0.114252674 |             |
| 0.08555443  | 0.04209814  | 0.02550327  | 0.1404383   | 0.06503508  | 0.02234413  |             |
| 0.07297624  | 0           | 0.7712498   | 0           | 0.3887982   | 0.04095358  | 0.1008149   |
| 0.3164766   | 0.1423361   | 0.05071815  | 0.3405301   | 0.1733490   | 0.052982126 |             |
| 0.1348467   | 0.02388745  | 0.09521182  | 0.01326708  | 0           | 0.02353004  | 0.6921754   |
| 0.0882667   | 0.3224156   | 0.2458695   | 0.1217155   | 0.043889757 | 0.06193521  |             |
| 0.1700861   | 0.1065455   | 0.09391951  | 0.1056389   | 0.101022229 | 0.05117203  |             |
| 0.07548796  | 0.2077347   | 0.08769016  | 0.05929449  | 0.08514635  | 0.074980654 |             |
| 0.1413445   | 0.3863317   | 0.04317311  | 0.1286921   | 0.12338259  | 0.1598711   |             |
| 0.01707627  | 0.04427549  | 0.119739619 | 0.059117835 | 0.05961608  | 0.1097116   |             |
| 0.07126954  | 0.02476887  | 0.2035256   | 0           | 0.2307220   | 0.02148477  | 0.1293573   |
| 0.05450076  | 0.03753951  | 0.09199077  | 0.019503412 | 0.06212649  | 10.31516    |             |
| 0.05687847  | 0.03459151  | 0.03291613  | 0.1737935   | 0.07979815  | 0.0178425   |             |
| 0.3006034   | 0.1325548   | 0.1092501   | 0.05292283  | 0.0488214   | 0.08710789  |             |
| 0.07311713  | 0.01394791  | 0.06431011  | 0           | 0.3523106   | 0.1454067   | 0.1426155   |
| 0.08928999  | 0           | 0.0358554   | 0.06457179  | 0.1375561   | 0.04458051  | 0.02798831  |
| 0.1780265   | 0.09188135  | 0.5573336   | 0.1284078   | 0.1138105   | 0.01014405  |             |
| 0.0868829   | 0.08283713  | 0.3187369   | 0.1761364   | 0.03005724  | 0           | 0.4512498   |
| 0.04312273  | 0.05304749  | 0.09833856  | 1.4314710   | 0.1537871   | 0.07424523  |             |
| 0.121430001 | 0.1194834   | 0.4049574   | 0.1655234   | 0.01739904  | 0.04304394  |             |
| 0.101257168 | 0.096210583 | 0.04945372  | 0.07080537  | 0.01491413  | 0.1565905   |             |
| 3.0259130   | 0.07778495  | 0.07183767  | 0.04758808  | 0.06003059  | 0.01580151  |             |
| 0.04406281  | 0.05968997  | 0.4626461   | 0.077275513 | 0.1350984   | 0.2502501   |             |
| 0.01323157  | 0.01772262  | 0.1119215   | 0.1912412   | 0.1000550   | 0.3110139   |             |
| 0.05264034  | 0.1080424   |             |             |             |             |             |
| AL589765.6  | 0           | 0           | 0           | 0.056962091 | 0           | 0           |
| 0.045950312 | 0           | 0           | 0.049501969 | 0           | 0.2967172   | 0.05183386  |
| 0.057254199 | 0.2338042   | 0.5658835   | 0           | 0.2929652   | 0.3141236   | 0.2571319   |

|             |             |             |             |             |             |             |
|-------------|-------------|-------------|-------------|-------------|-------------|-------------|
| 0.3924947   | 0.09057112  | 0.074832559 | 0.1361795   | 0.682054207 | 0.1898817   |             |
| 0.1420289   | 0           | 0.058709378 | 0.6607668   | 0.2701610   | 0.2087439   | 0.09303196  |
| 0.08932618  | 0           | 0.2574554   | 0.3881421   | 0           | 0.2907638   | 0.03385712  |
| 0.4281383   | 0.5242797   | 0.06603165  | 0.07547681  | 0.06857321  | 0.1444011   |             |
| 0.17894843  | 0.2127563   | 0.07147228  | 0.6851551   | 0.0834421   | 0.05792046  | 0           |
| 0.3641826   | 0.1181722   | 0.04397636  | 0.0933241   | 0.4711856   | 0.246288864 |             |
| 0.09038026  | 0.2134137   | 0.03956187  | 0.283767502 | 0.2073212   | 0.1906219   |             |
| 0.4309080   | 0.045289184 | 0.2251698   | 0.04643331  | 0.08215593  | 0.3691252   |             |
| 0.4933193   | 0.1027516   | 0.2471322   | 0.06676803  | 0.08572684  | 0.0229041   | 0           |
| 0.02559256  | 0.1581809   | 0.4403931   | 0.3331316   | 0.3342496   | 0.0670968   |             |
| 0.117315887 | 0.2755815   | 0.02424868  | 0.6135922   | 0.131788821 | 0.1607150   |             |
| 0.1687894   | 0.6391557   | 0           | 0.5039985   | 0.6885487   | 0.3140373   | 0.1227595   |
| 0.2117229   | 0.059399374 | 1.0687290   | 0.144846342 | 0.4741757   | 0.1936665   |             |
| 0.09586709  | 0.1107546   | 0.4860053   | 0           | 0           | 0.2198961   | 0.3369537   |
| 0.1699854   | 0.2765320   | 0.3171146   | 0.0409868   | 0.04171642  | 0.4360436   |             |
| 0.5130231   | 0.04142897  | 0.1135856   | 0.1321753   | 0           | 0.02648056  | 0.1884791   |
| 0.03024667  | 0.0743518   | 0.347356469 | 0.1778983   | 0           | 0.2066242   | 0.2040435   |
| 0.6085802   | 0.06129882  | 0.4235790   | 0.2942175   | 0.1292199   | 0.3899679   | 0           |
| 0.2175364   | 0.06166785  | 0.3149728   | 0.1204559   | 0.05677869  | 0.1384102   |             |
| 0.4072901   | 0.6135981   | 0.385228334 | 0.2448068   | 0.6368468   | 0.171154983 |             |
| 0.1537727   | 0.07776282  | 0.3698669   | 0.1938052   | 0.4601547   | 0           | 0.110698022 |
| 0.2324466   | 0.1368936   | 0.3308008   | 0.5247521   | 0.3990458   | 0.07333989  |             |
| 0.23991     | 0.07574851  | 0           | 0.049697302 | 0.1618835   | 0.5118886   | 0.5389493   |
| 0.03656767  | 0.2414796   | 0.2418242   | 0.1428606   | 0.2453445   | 0.03430399  |             |
| 0.08098775  | 0.5228726   | 0.1043131   | 0.3937331   | 0.04311307  | 0           | 0.2080915   |
| 0.3050262   | 0.5153447   | 0           | 0.2181649   | 2.3764470   | 0.1367564   | 0.166828    |
| 0.03147259  | 0.203965403 | 0.8933563   | 0.08410361  | 0.02697925  | 0.1155893   |             |
| 0.157215462 | 0.1166944   | 1.06491     | 0.2119504   | 0.1692836   | 0.2854625   |             |
| 0.1623409   | 0           | 0.06186259  | 0.2321126   | 0           | 0.1356197   | 0.1744978   |
| 0.1232599   | 0           | 0.02796667  | 1.4223840   | 0.299657445 | 0           | 0.1916848   |
| 0.1893208   | 0           | 3.7995820   | 0.23616327  | 0.8192297   | 0.1830670   | 0.6539294   |
| 1.429879824 | 0.06425882  | 0.06659742  | 0.07304901  | 0.1162080   | 0.05480868  |             |
| 0.4345796   | 0.07629206  | 0.4360945   | 0           | 0.08871675  | 0.1331605   | 0.314836699 |
| 0.1972712   | 0.188500026 | 0.2155631   | 0.2042367   | 0           | 0.7381812   | 0.04709062  |
| 0.7659804   | 0.1968651   | 0.1147305   | 0.1705435   | 0.242627404 | 0.3907964   |             |
| 0.2851016   | 0.0219379   | 1.0973360   | 0.1285562   | 0.2378704   | 0.1313434   |             |
| 0.1660215   | 0.02619669  | 1.4580230   | 0.1737047   | 0.07950808  | 0.0671555   |             |
| 0.03872215  | 0.653543671 | 0.4978943   | 0           | 0.5196849   | 0.2778819   | 1.23625     |
| 0.08589419  | 0.4209530   | 0.1469370   | 0.9539866   | 0.52473     | 0.076266198 | 0.237245991 |
| 0.3789952   | 0.6993352   | 0           | 0.1166482   | 0.3889311   | 0           | 0.06061414  |
| 0.1177366   | 0.3494187   | 0           | 0.2870544   | 0           | 0.1674739   | 0.07510451  |
| 0.08224316  | 0           | 0.1160388   | 0.07199195  | 0.176028047 | 1.2693760   | 0.07936377  |
| 0.5799423   | 0.1763145   | 0           | 0.3908815   | 0.1095089   | 0.05865153  | 0.1004245   |
| 0.09610327  | 0.5661436   | 0.087491713 | 0.04115476  | 0.5023064   | 0.08849681  |             |

|                     |                    |                    |                           |                           |                   |             |
|---------------------|--------------------|--------------------|---------------------------|---------------------------|-------------------|-------------|
| 0.03467096          | 0.03899724         | 0.077454622        | 0.09715095                | 0                         | 0.5101321         | 0.04855703  |
| 0                   | 0.3960468          | 0.071176015        | 0                         | 1.0027740.3585964         | 0.1603377         | 0.175682939 |
| 0.1180348           | 0.1134685          | 0.1961348          | 0.8453748                 | 0.117848011               | 0.01980687        | 0           |
| 0.03946437          | 0.3703149          | 0.1267865          | 0                         | 0.4684484                 | 0.2141433         | 0.1322392   |
| 0.3168787           | 0.6236071          | 0.0679179          | 0.097197331               | 0                         | 0.5104213         | 1.13384     |
| 0.2298540.1093607   | 0.2165296          | 0.2272472          | 0.38532                   | 0.4699887                 | 0.4404005         |             |
| 0.06599512          | 0                  | 0.2433067          | 0.2170557                 | 0.5344343                 | 0.06951088        | 2.106119    |
| 0.1522719           | 0.4439897          | 0                  | 0.7107396                 | 0.2636955                 | 0.1901240.1588349 |             |
| 0.04290672          | 0                  | 1.5305160.04649425 | 0.1314391                 | 0.2136869                 | 0.1683352         |             |
| 0.04740252          | 0.1745190          | 0                  | 0.1100874                 | 0.5824351.9116421.6310840 |                   |             |
| 0.1874043           | 0.07163557         | 0.1174968          | 0.5717608                 | 2.9441440.4716396         |                   |             |
| 0.1761948           | 0.115268448        | 0.2381834          | 1.08382                   | 0.3142489                 | 0                 | 0.02860187  |
| 0.033641726         | 0                  | 0.04107632         | 0.376390515               | 0.1982030.3468380         | 0.1409635         |             |
| 0.05303862          | 0.03952671         | 0                  | 0.3674930.2378910.1322095 | 0.2794723                 |                   |             |
| 1.508350445         | 0.2493620.2494297  | 0.04396062         | 0.2944085                 | 0.7436971                 |                   |             |
| 0.2723060.2216153   | 0.2781999          | 0.2186156          | 0.4187874                 |                           |                   |             |
| RBMS3-AS3           | 0.1449248          | 0.7944386          | 0.1676583                 | 0.30976013                | 0.102029978       |             |
| 0.2998542           | 0.9477925          | 0.6821441          | 0.5122638                 | 0.4616722                 | 0.09182489        |             |
| 0.781904904         | 0.6133385          | 0.380895127        | 0.97534223                | 0.1559257                 | 0.1138879         |             |
| 0.1392665           | 0.3755016          | 0                  | 0                         | 0.1256364                 | 0                 | 0.03125862  |
| 0.1023494           | 0.05021664         | 0                  | 1.910061387               | 0.8537324                 | 0.02545186        | 0.0850286   |
| 0                   | 0.04072613         | 0.262899255        | 0.09862996                | 0.1451730.1246334         | 0.166638          |             |
| 0.1600002           | 1.2053220.05764398 | 0.2433328          | 0                         | 0                         | 0.6670902         | 0.03834387  |
| 0.02471276          | 0                  | 0                  | 0.02047128                | 0.08621666                | 0                 | 0.03810872  |
| 0.0360954           | 0                  | 0                  | 0.1566889                 | 0                         | 0.03527817        | 0.03938503  |
| 0.04179032          | 0                  |                    |                           |                           |                   |             |
| 0.573495472         | 0.4451928          | 0                  | 0.07086286                | 0.145223359               | 0                 | 0           |
| 0.283925505         |                    |                    |                           |                           |                   |             |
| 0.8066440.1663418   | 0                  | 0                  | 0.06797147                | 0                         | 0.07377682        | 0.1195943   |
| 0                   |                    |                    |                           |                           |                   |             |
| 2.0102550.328384229 | 0.06876175         | 0                  | 0.06067908                | 0.07458779                | 1.0592470         |             |
| 0.026266893         | 0                  | 0                  | 0                         | 0.1919142                 | 0.3643886         | 0           |
| 0                   | 0                  | 0                  | 0                         | 0                         | 0                 | 0.4221737   |
| 0                   | 0.1054689          | 0.08245713         | 0.03160301                | 0                         | 1.1964360         | 0.2123348   |
| 0                   |                    |                    |                           |                           |                   |             |
| 0.08585813          | 0                  | 0                  | 0                         | 0.03799135                | 0.03938758        | 0           |
| 0.1217905           | 0                  | 0                  | 0                         |                           |                   |             |
| 0                   | 0.1378301          | 0.0218791          | 0.0742072                 | 0.1356356                 | 0.1972927         | 0.301511543 |
| 0.02371587          | 0.05626701         | 0.08126633         | 0.03329457                | 0.124436347               | 0.03186498        |             |
| 0.1683858           | 0                  | 0.03045674         | 0                         | 0.1097979                 | 0                 | 0           |
| 0.1746267           |                    |                    |                           |                           |                   |             |
| 0.1458804           | 0.02435307         | 16.182230          | 0                         | 0.2034029                 | 0.09916763        | 0.1459069   |
| 0.03925255          | 0                  | 0.1096239          | 0.1901190.061314248       | 0.5508727                 | 0                 | 0.03680568  |
| 0.2082853           | 0.08242249         | 0.07368938         | 0.231328166               | 0                         | 0                 | 0.04232338  |
| 0.02473503          | 0.1072151          | 0.06568287         | 0.1880045                 | 0.13568                   | 0.3566012         |             |
| 0.089017353         | 0                  | 0                  | 0                         | 0.5894971                 | 0.09611913        | 0.8353670   |
| 0                   | 0.2497506          | 0.2646967          | 0                         | 0                         | 0.2606377         | 0           |
| 0.04195822          |                    |                    |                           |                           |                   |             |
| 0.302044053         | 0.1953875          | 0.09253631         | 0.04122842                | 0.0306196                 | 0.2988207         |             |
| 0.05637342          | 0.456676209        | 0                  | 0                         | 0.0241625                 | 0.0517606         | 0.422404349 |
| 0.1881197           | 0                  | 0.1518575          | 0.2274145                 | 0                         | 0                 | 0           |
| 0.05540385          | 0                  |                    |                           |                           |                   |             |
| 0.4659296           | 0.04048678         | 0.02604657         | 0.07359399                | 0.056913265               | 0.82654512        | 0           |

0.167732399 0.07205187 0.1373376 0 0.03391096 0.42892 0.02597625  
0.338410793 0.04891322 0.08197697 0 0.091470988 0.0575499 0.1192887  
0.7850684 2.2272130.1472592 0.0353825 0.9565755 0 0.9277351 0  
0.1431096 0.140983155 0.1177835 0.27011162 0.5067756 0.02286419  
1.5237660 0 0 0.04407787 0.4452591 0 0.155211425 0.1166652 0  
1.5521510 0.05756719 0.03043366 0.03921019 0 0.3284630 0  
0.1780177 0.3007208 0.1040381 0 0.02346905 0.2756291 0.09308548  
0.09049809 0 0 0 0.02631923 0.03883573 0.1566486 0.307366462  
2.08226897 0.02828553 0 0.2656001 0.03482321 0.1161083 0.09972847  
0.09047625 0.1054443 0.1043126 1.4609520.1713897 0.02437172  
0.02499815 0.1345265 0 0.1509134 0.02598096 0.7092323 0.094589949  
0.0668734 0.03553891 0.1416528 0 0.04257944 0.03500717 0.1471135  
0 0 0 0.02414455 0 0.6265863 0 0.1188860.1863069 0.5238863  
0.231226685 0.1087599 0.1996593 0 1.1306740.07561394 0.05067111  
0.31872457 0.5407389 0.07184636 0.4817359 0.0478659 0.209787784  
0.1057114 0.1016219 0.1317431 1.024330448 0.07036276 0.03547789  
0.1165893 0 0 0 0.5833769 0 0.6712502 0.08882461 0.08108433  
0.02233999 0 0.05803299 0.1109156 1.5020020.0423109 0 0.9467816  
0.06464097 0.03392026 0.05309089 0 0 0.02955246 0 0 0.06479804  
0 0.3942730.02733667 0 0.03614865 0.1573316 0.04243568 0.02952056  
0.08513711 0 0.4995518 0 0.04421689 0.1249201 0.05885815 0 0  
0.04245348 0 1.2979090 0.5915625 0.04742056 0.0698799 0  
0.1833793 0.03356768 7.0892920.0526148 0 0 0.07039971 0.03155985  
0.051616948 0.09480709 0.1004136 0.03517998 0.1553141 0.07684712 0  
0.159043051 0.5150287 0.463503736 0 0.03882832 1.8007390.04208208 0  
0.03539994 0.5656390 0 0.02960155 0 0 0 0 0 0.1582026 0  
0.1083893 0.04961942 0 0.2741076 0  
AL390719.2 7.6957730 2.4990770 1.520835896 3.7013540.0981082 1.0120810  
0 2.8515021.507980305 6.4148372.946297659 0 9.41782711.930277.409721  
1.14941320.1786 6.847010542 5.1239363.2735248.83454 8.84038 2.698535  
6.53146214.362190.6045416 1.227913581 1.96942912.614374886 23.58804  
3.1995352.0993974.457540766 4.14502320.166498.39861 4.1915284.248152  
1.55628819.5832412.219757.00797816.415780.39548 6.8109124.5124464.444191  
9.8449054.04311 3.56087 6.330531862 11.431813.97551 18.337853.991525  
10.454474.18456110.070611.2927111.5899666.0215321.9060952.054902528 0  
16.5342313.973523.697972331 3.4364914.13516312.979830 0.7375621  
6.0953252.35343 11.805849.81505922.8900310.447169.6931350.2622616  
1.5670160 1.3950670.7918663 3.91936414.128980.1001108 17.93289  
5.187751319 2.9124522.14457115.7424212.168634679 13.141020.1760206  
2.69139635.507380.9254156 12.4097 32.061914.75995610.600884.906951  
1.486789803 6.0436783.122011006 4.91236717.720481.6352776.4685392.102576  
5.9007210.7314585 19.790246.28912 1.2480756.3577141.8697233.16894  
6.7755599.87284424.975742.0278797.3920392.59770812.015912151 11.53305  
2.4811640.1514172 1.6749491.893462283 2.6123472.9543876.0913326.639477



0.8575616 9.17190635.1841 4.0367713.4069293.1018451.5628942.465385  
0.03430157 22.3815 13.7129314.938326.8365381.4725584.3394150.589258843  
3.9148639.7296260.266564781 2.9295117.4829585.3490186.5327098.830355  
1.2814642.29875041 8.5075465.73621617.874453.10318126.302460.4691301  
10.4421 10.807290.4429514 0.63579314 12.636260.4918034 5.962298  
0.6508823 11.3126 1.51804313.349879.3617212.2515521.1937692.210368  
1.3731929.9209976.95444 1.49285 39.353961.6239377.2705043.043154186  
14.1979617.030841.40832538.718684.2221671.6280610.132360528 1.253084  
11.929164.0067882.5074790.393516513 0.1687635 9.81585 10.9405114.26536  
29.7718324.200142.1474221.27316615.286414.98371 10.762186.08249521.77953  
1.59063062 0.451121936 33.493031.145916483 2.103228382 11.621696.828700321  
9.2669365.80140519.004882.548409852 27.887671.98563723.400343.15296883  
1.93010818.521770.2641088 0.2714817 4.11564911.2293 13.1127316.75345  
0.1016816.8098879.96955514.666461875 24.579151.950201793 9.862014  
7.9947971.14480420.885824.58382134.7147920.8602214.9331 7.4703493.701674541  
7.48125710.202136.00365 16.6775310.2255 13.4957111.129064.5711431.937998  
24.127187.1257197.8499130.4108937 6.46153816.685625457 10.07203  
4.19405815.127730.05620601 19.457695.3271376.1091112.5663518.1525136.46981  
6.320821914 4.222834409 4.84860520.188682.87497 9.5378552.1633552.023333  
0.03371547 0.08731832 0.9501922 0 3.4860970.7114222 2.748049  
6.5169711.5210612.1088888.0035052.1824073.740248223 18.0047 2.582458  
2.49267812.111843.06761822.002952.7105940.2283666 15.5661115.55558  
10.047024.444791782 2.4722885.0640960 0.5592668 1.9305411.077066547  
0.9997099 0.5580143 24.6196 0.8912946 1.3305863.8394020.633444901  
1.47395974.6524413.403871.0702183.159622949 35.486323.91311211.07327  
0.055320432 1.332864588 0.5398427 3.7798345.20245913.9609111.37764  
1.97263215.586561.0323142.33538813.9999 3.1773262.72001910.236149276  
1.7221696.85445 7.0162792.9565769.3272363.7336543.28645 0.1318935  
13.9534123.5165812.8663411.0908231.4578 6.9220337.7019682.13941425.29736  
0.7622854 43.824320.6351448 11.2275318.022770 28.3379 0.07159814  
1.90655216.367333.8275081.42565515.3668113.4457426.472224.9507160.8623366  
2.9543360.2755531 12.6936734.546871.1849920.1993112 20.639530.01992296  
5.83296714.06152176.158 41.493531.9993025.962777243 1.11876215.57028  
8.08426833.954470.5568237 1.403442811 0.809975482 1.3023310 11.16247  
14.493270.3727974 10.650461.0620622.8361925.65783811.9434422.00622  
1.32370215.642271.26741236 15.2295819.7474 3.3255072.48913915.38524  
3.9549216.93389910.257285.25315417.83674  
AP001619.1 0.1324965 0 0.07664022 0.070799016 0.069960152 0.05140118  
0.05415705 0.1039409 0 0.1151129 0.0629627 0.112871237 0.06728886  
0 0.182393163 0.05345776 0.1561819 0.1273234 0 0.1284018  
0.140637832 0.1148622 0.03475056 0.1081727 0.4947474 0.2572018  
0.1754479 0.5853553 0.05561918 0.045954222 0.04181352 0.139615123  
0.03886841 0.2616573 0 0.180265373 0.4959447 0.3318084 0.0854589  
0.1142607 0 0.08699664 0.07905092 0.3813691 0 0.5803080.1247487

|             |             |             |             |             |             |             |           |   |
|-------------|-------------|-------------|-------------|-------------|-------------|-------------|-----------|---|
| 0.1051669   | 0.3389021   | 0.2432978   | 0.0926997   | 0.1684416   | 0.1182345   |             |           |   |
| 0.219782299 | 0           | 0.04389069  | 0.1979998   | 0.03416086  | 0.2489802   | 0.1074388   |           |   |
| 0.5750803   | 0.2418962   | 0           | 0.1146195   | 0.4208760   | 0.241991206 | 0           | 0.4867796 |   |
| 0.2915365   | 0.149365636 | 0           | 0.2341195   | 0.4478151   | 0.111247258 | 0.3687344   |           |   |
| 0           | 0           | 0.4533552   | 0.4194615   | 0           | 0.4046997   | 0.08200369  | 0         | 0 |
| 0.1257299   | 0.06475864  | 0.3328526   | 0           | 0.09473568  | 0.2060187   | 0.3241934   |           |   |
| 0           | 0.1786916   | 1.0833090   | 0.242792157 | 0.9211453   | 0.05552329  | 0.2764068   |           |   |
| 0.1471881   | 0.2383929   | 0.8253398   | 0.6644528   | 0.2410605   | 0.03769293  |             |           |   |
| 0.1733570   | 4.92225     | 0.088949264 | 0           | 0.3567883   | 0.2747332   | 0.1360274   |           |   |
| 0.6963901   | 0           | 0.1563      | 0           | 0.6897375   | 0.04175481  | 0.05660554  | 0         |   |
| 0.1006790   | 0.3586492   | 0.1890153   | 0.3300465   | 0.1526477   | 0           | 0.05411206  |           |   |
| 0.206741136 | 0.0325231   | 0.2700690   | 0.1485944   | 0.3196129   | 0.255971411 |             |           |   |
| 0.3932865   | 0.3463776   | 0.6767290   | 0.0835346   | 0.04983005  | 0.1505729   |             |           |   |
| 0.2774585   | 0.1806772   | 0.09522382  | 0.09579077  | 0           | 0.1001908   | 1.590534    |           |   |
| 0.1450672   | 0.09862829  | 0           | 0.06799749  | 0.05002288  | 0.2153182   | 0.295707992 |           |   |
| 0.4510032   | 0.2085780   | 0.04721546  | 0.09550735  | 0.1514220   | 0.0952117   |             |           |   |
| 0.2825782   | 0.3031651   | 0.045319324 | 0.1141953   | 0           | 0.3482447   | 0.6105734   |           |   |
| 0           | 0.1351127   | 0.09207954  | 0           | 0           | 0.122075251 | 0.1325489   | 0.2286165 |   |
| 0.2206437   | 0.04491197  | 0.2636288   | 0.08485873  | 0.7018385   | 0.4218609   |             |           |   |
| 0.2106588   | 0.1492023   | 0           | 0.2775849   | 0           | 0.2647548   | 0.03971437  |           |   |
| 0.2555754   | 0.1070371   | 4.385       | 0.046023615 | 0.6430739   | 0.3384027   | 0.0565392   |           |   |
| 0.1259719   | 0.05122402  | 0.07730851  | 0           | 0.2862286   | 0.1032950   | 0.1325424   |           |   |
| 0.1419653   | 0.193090131 | 0.1146581   | 0.3736883   | 0.05206299  | 0.2425641   |             |           |   |
| 0.4820772   | 0.1993851   | 0.1896649   | 0.1013052   | 0.1710467   | 0           | 0.3331328   |           |   |
| 0.2857548   | 0.1513863   | 0.07804884  | 0.137393304 | 0.2911591   | 0.046004457 |             |           |   |
| 0.049404694 | 0.1412550   | 0.11379726  | 0.2790258   | 0.1960686   | 0.2137375   |             |           |   |
| 0.2320423   | 0.6037008   | 0.03747344  | 0.1529806   | 0.188160121 | 0           | 0.2453824   |           |   |
| 0.7626023   | 0.3425406   | 0.1346307   | 0.2426116   | 0.09370098  | 0.6070202   | 0           |           |   |
| 0.1452811   | 0.2289646   | 0.096669658 | 0.08076204  | 0           | 0.3971281   | 0.1567757   |           |   |
| 0.1348154   | 0.5439752   | 0.05783613  | 0.6135442   | 0.06044683  | 0           | 0.3141892   |           |   |
| 0.170281169 | 0.1199929   | 0.4668777   | 0.2424948   | 0.2378356   | 0.0394728   | 0           |           |   |
| 0.2688573   | 0.1529292   | 0.03217446  | 0.8394030   | 0.1066710   | 0           | 0.2377904   |           |   |
| 0.120401166 | 0.2252923   | 0.0944970   | 0.1276541   | 0.2171853   | 0.4498808   | 0           |           |   |
| 0.1880034   | 0.03609326  | 0.2130318   | 0.05370559  | 0.046834611 | 0.233106128 |             |           |   |
| 0.3491080   | 0.0858915   | 0.1040670   | 0.1910213   | 0.1061512   | 0.04558803  | 0.07444556  |           |   |
| 0           | 0.5245189   | 0.09540465  | 0.2350378   | 0.1671126   | 0.1028447   | 0           |           |   |
| 0.2777777   | 0           | 0.1781469   | 0.08841965  | 0.432391042 | 0.6419547   | 0           |           |   |
| 0.06475256  | 0           | 0           | 0.0480076   | 0.5379899   | 0.0720351   | 0.3700206   |           |   |
| 0.2950822   | 0.3642208   | 0.07163751  | 0.05054578  | 0.1542317   | 0           | 0           |           |   |
| 0.09579188  | 0.095128831 | 0.05965981  | 0           | 0.5528277   | 0.1192743   | 0           |           |   |
| 0.1389771   | 0           | 0.1235917   | 0.4926378   | 0.1761695   | 0.09846241  | 0.179809719 |           |   |
| 0.07248445  | 0           | 0.06022259  | 0           | 0.048246501 | 0.07297969  | 0.09593191  | 0         |   |
| 0.3032108   | 0.1557176   | 0.08889138  | 0.2615194   | 0.0876694   | 0.1218109   |             |           |   |
| 0.1667943   | 0.09190881  | 0.2919558   | 0.198960979 | 0           | 4.6569210   | 0.05802367  |           |   |

|             |             |             |            |             |            |             |
|-------------|-------------|-------------|------------|-------------|------------|-------------|
| 0.1411520   | 0.08954365  | 0.6648475   | 0.04651704 | 0.03640349  | 0.1443086  |             |
| 0.3605964   | 0.4052720   | 0.1295721   | 0.3652322  | 0.08886175  | 0.2386857  |             |
| 0.1422874   | 0.4123740   | 0.9418866   | 0.1887892  | 0.3491687   | 0.08096691 |             |
| 0.05837701  | 0.1950790   | 0.1053950   | 0.04009304 | 0.2425499   | 0.05710367 | 0.2421479   |
| 0.1499701   | 0.2480968   | 0.3493152   | 0.2143421  | 0           | 0.2836231  | 0.33802     |
| 0.1950926   | 0.5270695   | 0.2861826   | 0.12574    | 1.3810060   | 0.08798195 | 0.07215408  |
| 0.6019112   | 0           | 0.09654368  | 0.04328006 | 0.141571315 | 0.06500755 | 0.1836048   |
| 0.1447338   | 0.07099744  | 0           | 0          | 0.261727222 | 0          | 0.057784785 |
| 0.8231567   | 0.1731296   | 0           | 0.2427311  | 0           | 0          | 0.06742497  |
| 0.04290556  | 0.039415698 | 0.1225054   | 0.4084620  | 0           | 0.2459153  | 0.03716033  |
| 0.06804632  | 0.3416817   | 0           | 0.6613067  |             |            |             |
| AC092171.1  | 0.1966333   | 0.08084178  | 0.09099118 | 0.042028101 | 0.04153013 |             |
| 0.03051305  | 0.2250430   | 0.03085099  | 0.1042555  | 0.06833396  | 0.03737627 | 0           |
| 0.1398053   | 0.056377813 | 0.036091077 | 0.03173389 | 0.1545226   | 0.07558244 | 0           |
| 0.0762226   | 0.041743101 | 0.1704628   | 0.02062882 | 0.06421405  | 0.02669952 |             |
| 0.2544693   | 0.04166014  | 0.5110027   | 0.03301696 | 0.054559196 | 0.173751   |             |
| 0.227917516 | 0.2076595   | 0.1812142   | 0.1657710  | 0.085608097 | 0.2141130  | 0.157576    |
| 0.2029223   | 0.2034842   | 0.1953788   | 0.05164342 | 0.1877066   | 0.05659761 |             |
| 0.03827399  | 0.2914879   | 0.2221621   | 0.2809338  | 0.1207086   | 0.2407130  |             |
| 0.06666081  | 0.1052805   | 0.156562052 | 0.3102343  | 0.1563278   | 0.4407665  |             |
| 0.02027876  | 0.1900299   | 0.1275568   | 0.2655196  | 0.1723149   | 0          | 0.1360822   |
| 0.03123034  | 0.179565188 | 0           | 0.4001051  | 0.3172830   | 0.02955575 | 0.06046181  |
| 0.06948966  | 0.09666707  | 0.165098022 | 0.2371310  | 0.06770754  | 0.05989855 |             |
| 0.1009212   | 0.2490030   | 0.2247436   | 0.2102101  | 0.09735896  | 0          | 0.1001940   |
| 0.3918415   | 0.03844238  | 0.1234936   | 0.1214404  | 0.3936626   | 0.2690555  |             |
| 0.192449468 | 0.08929864  | 0.07071726  | 0.16776    | 0.28825523  | 0.2734077  | 0           |
| 0.04102054  | 0.02912487  | 0.1415161   | 0.2939657  | 0.4661518   | 0.2289595  |             |
| 0.08950194  | 0.07718185  | 0.06496067  | 5.9738110  | 0.29041403  | 0.1296427  |             |
| 0.1058993   | 0.1630886   | 0.1211240   | 0.2362257  | 0.1143016   | 0.1855673  |             |
| 0.3527098   | 0.1091855   | 0.04957344  | 0.2352175  | 0.04624061  | 0.149414   |             |
| 0.1520738   | 0.1122043   | 0.2849804   | 0.1208207  | 0           | 0.06424459 | 0.081817873 |
| 0.1158393   | 0.1145142   | 0.0441047   | 0.1084174  | 0           | 0.2594054  | 0.1028093   |
| 0.3515081   | 0.1239707   | 0.1183216   | 0.04469197 | 0.08235321  | 0.03575153 | 0           |
| 0.05686384  | 0.1187579   | 0.09912638  | 6.6991930  | 0.2296415   | 0.1463707  |             |
| 0.04139641  | 0.1210951   | 0           | 0          | 0.105323882 | 0.1338635  | 0.4333603   |
| 0.0560566   | 0.2267824   | 0.1498133   | 0.08478014 | 0.1341965   | 0.05998883 |             |
| 0.188318945 | 0.3050515   | 0.03326896  | 0.2411815  | 0.2214984   | 0.2327502  |             |
| 0.1336773   | 0.05466076  | 0.1380675   | 0.0669925  | 0.036233491 | 0.1573688  |             |
| 0.1696407   | 0.9605180   | 0.07998267  | 0.1760588  | 0.1007486   | 0.5728652  |             |
| 0.1431014   | 0.1750734   | 0.2066640   | 0.4066324  | 0.0253510   | 0.05741288 | 0.1257321   |
| 0.07072638  | 0           | 0.09530984  | 0.61483    | 0.136603958 | 0.2863088  | 0.05022112  |
| 0.1006893   | 0.04985342  | 0.09122366  | 0.4359769  | 0.049569281 | 0.05663752 |             |
| 0.1532964   | 0.1573611   | 0.04213712  | 0          | 0.08507998  | 0.1848591  | 0.1236237   |
| 0.2057032   | 0.2341418   | 0.2564469   | 0.05629497 | 0.1653777   | 0.1353836  |             |

|                     |                     |                    |             |                   |                   |
|---------------------|---------------------|--------------------|-------------|-------------------|-------------------|
| 0.1264342           | 0.4284717           | 0.02120392         | 0.08986676  | 0.185327127       | 0.081560169       |
| 0.3456789           | 0.081928256         | 0.175967315        | 0.05590171  | 0.168882388       | 0.2208491         |
| 0.2715797           | 0.06344             | 0.10330967         | 0.2787339   | 0.1334711         | 0.06810989        |
| 0.14892886          | 0.2811003           | 0.4369958          | 0.2662942   | 0.03389014        | 0.1198803         |
| 1.0945550.1112466   | 0.3603427           | 0                  | 0.02156064  | 0.0582511         | 0.286927868       |
| 0.1917696           | 0.027486458         | 0.1768090.09306604 | 0.1400522   | 0.1793986         |                   |
| 0.2746640.1942483   | 0.1435311           | 0.02788271         | 0.06217024  | 0.126354055       |                   |
| 0.07123082          | 0.3117943           | 0.07997283         | 0.3059014   | 0.1405924         | 0.1982028         |
| 0.2872810.03026089  | 0.07639833          | 0.1328776          | 0.4432583   | 0.1159361         |                   |
| 0.09792395          | 0.2258535           | 0.166770805        | 0.1528449   | 0.1682875         | 0.2525958         |
| 0.05525431          | 0.2336781           | 0.1252481          | 0.05580181  | 0.02142588        | 0.4426139         |
| 0.1594050.278022194 | 0.069188871         | 0.1381596          | 0.2039495   | 0.03088842        |                   |
| 0.02834877          | 0.03150703          | 0.08118666         | 0.02946185  | 0.08583982        | 0.877491          |
| 0.1132693           | 0.1046433           | 0.03968092         | 0.1221025   | 0.1095149         | 0.04497161        |
| 0.3685653           | 0.08460202          | 0.07873224         | 0.256678347 | 0.2722005         | 0.05786283        |
| 0.07687754          | 0.09641099          | 0                  | 0.1424927   | 0.8782525         | 0                 |
| 0.2802693           | 0.1965553           | 0.085051705        | 0.0900158   | 0.1831117         | 0.09678237        |
| 0.02527803          | 0.1137290.112941799 | 0.08853896         | 0.06095176  | 0.2625381         |                   |
| 0.1062064           | 0.1436297           | 0.08250037         | 0.05189327  | 0.1222786         | 0.9650597         |
| 0.2353021           | 0.1948327           | 0.042695854        | 0.1290859   | 0.08272804        | 0.1787483         |
| 0.326302389         | 0.286403533         | 0.1155269          | 0.7403191   | 0.1150913         | 0.08999684        |
| 0.1540632           | 0.2638410.2794402   | 0.1561284          | 0.1205168   | 0.06600889        |                   |
| 0.2000512           | 0.1733124           | 0.047243324        | 0           | 5.4757720.1722217 | 0                 |
| 0.1841795           | 0.0276137           | 0.1080502          | 0.2141632   | 0.1070296         | 0.1443479         |
| 0.0197101           | 0                   | 0.07084497         | 0.1689308   | 0.1335249         | 0.07401266        |
| 0.06404003          | 0.06909182          | 0.02403201         | 0.06930816  | 0.02895097        | 0.03128259        |
| 0.04760051          | 0.1079879           | 0.06779639         | 0.1916603   | 0.2670782         | 0.1472766         |
| 0.06912081          | 0                   | 0.09828814         | 0.1894117   | 0.04013145        | 0.2702279         |
| 0.09707731          | 0.1119637           | 0.08198004         | 0.05222833  | 0.06424876        | 0.5359648         |
| 0.0330235           | 0.1146216           | 0.1027686          | 0           | 0.05788521        | 0.3542257         |
| 0.1685836           | 0.08341263          | 0.024527633        | 0           | 0.08984421        | 0.274420176       |
| 0.4109202           | 0                   | 0.01712903         | 0.1546784   | 0.08645484        | 0.3150610.1913808 |
| 0.08005036          | 0.04819589          | 0.4075174          | 0.023398163 | 0.07272232        | 0.2424734         |
| 0.3525607           | 0.08585939          | 0.1668361          | 0.1544152   | 0.04039403        | 0.202831          |
| 0.03187782          | 0.239903            |                    |             |                   |                   |
| AC129507.1          | 0.1491021           | 0.1332615          | 0.2024892   | 0.290976515       | 0.06161333        |
| 0.4627457           | 0.1907827           | 0.5187262          | 0.1947716   | 0.07885033        | 0.01232239        |
| 0.287169333         | 0.3028883           | 0.37173812         | 0.440251097 | 0.1046218         | 0.366795          |
| 0.2616430.07918461  | 0.03141179          | 0.055048258        | 0.0786786   | 0.07481109        |                   |
| 0.007056798         | 0.008802423         | 0.1426209          | 0.05493885  | 0.03369396        | 0.02177038        |
| 0.080943011         | 0.6955799           | 0.081971926        | 0.1293174   | 0                 | 0.1093044         |
| 0.1676508           | 0.0129876           | 0                  | 0.2236188   | 0.02147114        | 0.01702605        |
| 0.1679343           | 0.06309175          | 0.1223080.02441448 | 0.07203745  | 0.01326526        |                   |
| 0.03174376          | 0.009071096         | 0.03845984         | 0.03470938  | 0.06021881        | 0.07159568        |

|             |             |             |             |             |             |             |
|-------------|-------------|-------------|-------------|-------------|-------------|-------------|
| 0.03435926  | 0.0581256   | 0           | 0.06264995  | 0.3469417   | 0.02501079  | 0.02840479  |
| 0.0317115   | 0.03364816  | 0.01029617  | 0.011839981 | 0.3801788   | 0.007328252 |             |
| 0.04754699  | 0.087696724 | 0           | 0.02290968  | 0.02390225  | 0.174176968 | 0.05412355  |
| 0.05580536  | 0.02962146  | 0           | 0.04560695  | 0           | 0.01980087  | 0.08024442  |
| 0.03090896  | 0.005505407 | 0.025181328 | 0.04306139  | 0.03168467  | 0.008142793 |             |
| 0.02001853  | 0.01236043  | 0.0887035   | 0.028198959 | 0           | 0.0233144   | 0.08296189  |
| 0           | 0.1416460   | 0.09779781  | 0.04057154  | 0.04801013  | 0.0266604   | 0.01615267  |
| 0.02364356  | 0.03774223  | 0.02950743  | 0.2883844   | 0.057110782 | 3.275322    |             |
| 0.121857376 | 0.0997295   | 0.04655119  | 0.1152168   | 0           | 0.07139     | 0.03768351  |
| 0.07137516  | 0.08456948  | 0.0179984   | 0.1144053   | 0.03323469  | 0           | 0.009851907 |
| 0.03008185  | 0.09248014  | 0.03523263  | 0.07966552  | 0           | 0.1270828   | 0.134870531 |
| 0.006365073 | 0.1208115   | 0.08724389  | 0.04467944  | 0.400767849 | 0           | 0.101684    |
| 0.0496658   | 0.04904549  | 0.009752204 | 0.02946852  | 0.0135753   | 0.01178673  | 0           |
| 0.02812071  | 0.04894084  | 0           | 1.4526510   | 0.03785465  | 0.01930247  | 0.2593076   |
| 0.2153787   | 0.2212338   | 0           | 0.1176874   | 0.1530775   | 0.057596199 | 0.2587341   |
| 0.09345838  | 0.06914763  | 0.02795072  | 0.05530318  | 0.0197774   | 0.008869412 |             |
| 0.02234907  | 0           | 0.04543649  | 0.03319303  | 0.01918355  | 0.2908710   | 0.08649994  |
| 0.04551875  | 0.09570776  | 0           | 0.01297052  | 0           | 0.09356104  | 0.008789689 |
| 0.09029054  | 0.05812674  | 0.1116020   | 0.1297404   | 0.2721040   | 0.01946684  | 0.05865147  |
| 0.2799876   | 0.0378563   | 0.03108898  | 0.05440729  | 0.02500924  | 0.05237034  |             |
| 0.1238723   | 0.036028995 | 0.08390368  | 0.01655714  | 0.04426099  | 0.02465387  |             |
| 0.3909757   | 0.01512999  | 0.024513355 | 0.2334066   | 0.0303237   | 0           | 0.06945983  |
| 0.321211013 | 0.02243966  | 0.01218905  | 0.1222705   | 0.01356344  | 0.017154    |             |
| 0.01951076  | 0.03711919  | 0.02973954  | 0.01115848  | 0.1945227   | 0.03259859  |             |
| 0.04893426  | 0.0395036   | 0.015274882 | 0.21511316  | 0.0854738   | 0.045017496 |             |
| 0.019337914 | 0.04607485  | 0.03340677  | 0.01820265  | 0.1790714   | 0.0209152   |             |
| 0.102178872 | 0.07876656  | 0.0146678   | 0           | 0.135023834 | 0           | 0.3862898   |
| 0.005586532 | 0           | 0.06647387  | 0.05501446  | 0.02096461  | 0.4540473   | 0.02132465  |
| 0.1024240   | 0.009459575 | 0           | 0.045309332 | 0.4728067   | 0.1165933   | 0.05276924  |
| 0.05914499  | 0           | 0           | 0.01183001  | 0.5607427   | 0.01024829  | 0.241610639 |
| 0.07827905  | 0.03426461  | 0.01054633  | 0           | 0.05407636  | 0.01633611  | 0.1157593   |
| 0.01995311  | 0.2770610   | 0.1752309   | 0.01043825  | 0.01911118  | 0.2421303   |             |
| 0.01861511  | 0.007854542 | 0.01259766  | 0.4068667   | 0.2664864   | 0.06072168  |             |
| 0.03301719  | 0           | 0           | 0.007063786 | 0.0416923   | 0.04204273  | 0.009165968 |
| 0.03036608  | 0           | 0.02036688  | 0.09346159  | 0           | 0.05353201  | 0.08741812  |
| 0.08490024  | 0.0933211   | 0.05601473  | 0.05749886  | 0.02616439  | 0           | 0.03610541  |
| 0.1828596   | 0.02025173  | 0.0278920   | 0.02595682  | 0.186170469 | 0.03589614  |             |
| 0.009538246 | 0.1013814   | 0.01059508  | 0.01142784  | 0.01879107  | 0.3158689   |             |
| 0.07048969  | 0.008046274 | 0.01155006  | 0.0712814   | 0.007010063 | 0.6133213   |             |
| 0.01509228  | 0.2446255   | 0.05833646  | 0.1499789   | 0.018617595 | 0.1050838   |             |
| 0.006698289 | 0.07212901  | 0.1517301   | 0.03382323  | 0.01359956  | 0.025662631 |             |
| 0.1451283   | 0.04820689  | 0           | 0.9570770   | 0.014076172 | 0.01418588  | 0.02727417  |
| 0.1414334   | 0.047811967 | 0           | 0.0142828   | 0.01251651  | 0.009485963 | 0.03956078  |
| 0.02031692  | 0.01739687  | 0.01023635  | 0.02573657  | 0.2145558   | 0.03264319  | 0           |

|             |             |             |             |             |             |             |
|-------------|-------------|-------------|-------------|-------------|-------------|-------------|
| 0.008162637 | 0.046726212 | 0           | 0.9990376   | 0.1703366   | 0.05524949  | 0.01752452  |
| 0.06939564  | 0.01820763  | 0.1781125   | 0.01412127  | 0.01176201  | 0.03965775  |             |
| 0.04226411  | 0.01299624  | 0.01739107  | 0.05839127  | 0.01113878  | 0.02201057  | 0           |
| 0.04850946  | 0.01055651  | 0.0569463   | 0.01584598  | 0.3084729   | 0.009544695 |             |
| 0.08250714  | 0.01569316  | 0.01186732  | 0           | 0.03159373  | 0.007337635 | 0.01618495  |
| 0.02278808  | 0.01398291  | 0.05670718  | 0.0346923   | 0.1587687   | 0.03818144  |             |
| 0.05626495  | 0.008001228 | 0.08612968  | 0.00900919  | 1.2053220   | 0.01412122  | 0 0         |
| 0.02834174  | 0.1185843   | 0.069267051 | 0.1335871   | 0.1167828   | 0           | 0           |
| 0.1581243   | 0.032345547 | 0.845170372 | 0.2270887   | 0.033927057 | 0           | 0.01042109  |
| 1.7720930   | 1.129436    | 0.02549755  | 0.03800379  | 0.08789067  | 0.1261907   |             |
| 0.03518851  | 0.08739198  | 0.0503821   | 0.007714018 | 0.09590176  | 0.01998495  |             |
| 0.02113343  | 0.2972186   | 0.09625582  | 0.02909048  | 0.2996392   | 0.009552898 |             |
| 0.4834430   | 0.04314129  |             |             |             |             |             |
| AC005387.1  | 0.2103194   | 0.2594057   | 0.4379597   | 0           | 0.177682887 | 0.1305473   |
| 0.2750932   | 0.2639863   | 0.1486826   | 0.1096352   | 0           | 0           | 0.6835937   |
| 0.482414696 | 0           | 0.4073117   | 0.7933331   | 0.7275884   | 0           | 0.7337508   |
| 2.411019872 | 0.4375858   | 0.7060683   | 0.3663120   | 0.6282730   | 0.5987980   | 0.4901576   |
| 0.8307858   | 0.1412601   | 0.875349604 | 0.5309841   | 1.241067386 | 1.92498     |             |
| 0.2215167   | 0.8510835   | 0.366266462 | 0.4007776   | 0.6741744   | 0.7596616   |             |
| 0.8705888   | 0.2089776   | 0.7180930   | 0.3011571   | 1.3318120   | 0.4093794   | 1.0203581   |
| 0.2670999   | 0.2582203   | 0.3089606   | 0.9417447   | 0.3565028   | 0.3002887   |             |
| 0.111639418 | 1.5927710   | 0.4458895   | 2.3257950   | 0.1735216   | 1.1292020   | 0.7503928   |
| 3.6514330   | 0.1843084   | 0.2743525   | 0.7277689   | 0.6680808   | 1.152379997 | 0           |
| 0.9510073   | 0.7404363   | 0.758709539 | 0.6467009   | 0.4459578   | 0.8788602   |             |
| 0.635721191 | 0.8584597   | 0.7966215   | 0.3844057   | 0.2158911   | 1.242893    |             |
| 0.5609012   | 1.2205660   | 0.6248122   | 0.1337046   | 0.2500581   | 0           | 0.119747    |
| 0.6578889   | 0.8453699   | 1.3638760   | 0.7218213   | 1.2034541   | 1.143579937 | 0.6208412   |
| 0.3025574   | 1.1962431   | 0.952683514 | 1.0861960   | 0.2820331   | 0.7897618   | 4.236676    |
| 0.5189689   | 1.4149180   | 0.6903651   | 1.2244780   | 0.8137175   | 0.3302155   | 0.416892482 |
| 0.4167132   | 0.508299556 | 1.8488810   | 0.5285940   | 0.2492      | 1.1228060   | 0.3790013   |
| 0.5705340   | 0.2646443   | 0.4801480   | 0.3503553   | 0.3181432   | 1.7970651   | 1.187018    |
| 0.1278509   | 0.2602536   | 0.4400513   | 1.3335690   | 0.1938452   | 0.2952580   | 0.6871616   |
| 0.350050333 | 0.9912154   | 0.4899386   | 0           | 0           | 1.083515349 | 0.3329528   |
| 0.4398601   | 1.93358     | 1.3259930   | 1.0516581   | 0.9819170   | 0.6118386   | 0.5240015   |
| 0.3649302   | 0.6986305   | 0.3816929   | 0.5770851   | 0.7193760   | 0.8767270   | 0.7969986   |
| 0.4317454   | 0.6352338   | 0.5468594   | 0.600824874 | 0.1909076   | 2.118963    |             |
| 0.160166055 | 0.5995826   | 0.9702679   | 1.9228880   | 0.2418161   | 0.1435369   |             |
| 0.5133136   | 0.748155096 | 0.3625375   | 1.8503970   | 0.8844625   | 0.4738304   |             |
| 0.8713256   | 0.2859631   | 0.7249694   | 0.7088511   | 0.04777022  | 0.542575939 |             |
| 2.1040250   | 0.3628962   | 1.1674680   | 0.1140662   | 1.0461830   | 0.4849242   | 1.169772    |
| 0.3826538   | 0.2140102   | 1.1999760   | 0.3805681   | 0.3796168   | 0.7369073   |             |
| 1.3448340   | 0.6556255   | 1.0547930   | 0.1359248   | 1.3152470   | 0.116889523 | 0.8846833   |
| 0.6983162   | 0.5025885   | 3.35937     | 0.5854382   | 0.8835573   | 0.159058248 |             |
| 1.1510132   | 0.6234590   | 0.2103922   | 0.1802798   | 0.735607573 | 0.3640069   | 2.135438    |

|                                             |                                   |                                   |                                    |                    |                   |
|---------------------------------------------|-----------------------------------|-----------------------------------|------------------------------------|--------------------|-------------------|
| 1.1239390.5280495                           | 0.7791424                         | 0.8861876                         | 0.2408529                          | 0.3537767          |                   |
| 0.7964362                                   | 1.0818740.4935477                 | 0.4989547                         | 1.6661090.396452632                | 0.567040122        |                   |
| 4.3444330.525783891                         | 0.18821504                        | 1.0164740.289019177               | 0.5314966                          | 0.4979696          |                   |
| 2.4428010.884002058                         | 2.4702570.9041532                 | 2.8168860.318589295               | 0.7015529                          |                    |                   |
| 1.3503                                      | 0.6266236                         | 0.7974774                         | 0.4274143                          | 0.6777960.9519168  | 0.6801588         |
| 0.3801481                                   | 0.09224526                        | 0.8722772                         | 1.841392199                        | 1.1281450.29399578 |                   |
| 0.8405125                                   | 0.4379921                         | 0.4280005                         | 2.1491140.8078984                  | 0.5713631          |                   |
| 1.5352121.6701110.8644666                   | 1.081188675                       | 1.47298                           | 0.8893225                          | 0.2737252          |                   |
| 1.4597830.2005039                           | 0.9539916                         | 0.4097019                         | 3.1072440.3268633                  | 0.3553155          |                   |
| 0.4063801                                   | 0.3720165                         | 0.4189587                         | 0.3019668                          | 1.936680123        | 0.4495789         |
| 0.8400032                                   | 0.7024604                         | 0.2758006                         | 0.6427096                          | 0.4688798          | 0.7162289         |
| 0.2291717                                   | 0.8115785                         | 1.023                             | 0.71369561                         | 0.444027439        | 1.0344310.8725796 |
| 0.3964599                                   | 0.6670821                         | 0.3369999                         | 0.1736749                          | 0.06302493         | 0.06120964        |
| 0.6055267                                   | 0.2423061                         | 0.8954140.5093136                 | 0.2176685                          | 0.7028246          |                   |
| 0.3527461                                   | 1.51117                           | 0.6786788                         | 0.6736974                          | 0.384361241        | 2.4456280.2475608 |
| 0.08222839                                  | 2.4061660.4449067                 | 3.2920670.1707965                 | 0                                  | 1.0441871.498883   |                   |
| 1.5136990.500343235                         | 1.0269980.58757                   | 0.5520994                         | 0.6488985                          | 0.7906913          |                   |
| 0.362408414                                 | 0.2651641                         | 0.3477021                         | 0.7020284                          | 0.4543945          | 0.2194666         |
| 1.1471540.777072233                         | 0.3662106                         | 1.1886291.39822                   | 0.5418230.685013733                |                    |                   |
| 1.1045640.1769722                           | 0.8412344                         | 0.310234469                       | 0.673943313                        | 0.1235679          |                   |
| 0.3248603                                   | 0.1231019                         | 1.15513                           | 0.5932310.2257639                  | 1.12914            | 0.4453207         |
| 0.1546860.6354293                           | 0.3890458                         | 0.3177863                         | 0.202126267                        | 0.3863138          |                   |
| 1.0235361.7684030.5377408                   | 0.5116961                         | 0.5628539                         | 0.8269990.2311415                  |                    |                   |
| 0.7330221                                   | 0.6868746                         | 2.5732470.7130148                 | 0.3794755                          | 1.0155991.439743   |                   |
| 0.1445510.5712742                           | 0.3166564                         | 1.5108490.6849737                 | 1.6258170.3598657                  |                    |                   |
| 0.8154538                                   | 0.8670488                         | 0.4684390.2545681.3860490.4350911 | 0.5125006                          |                    |                   |
| 0.9046137                                   | 0.8401459                         | 0.7393177                         | 0.2268251                          | 0.1051292          | 0.7653594         |
| 0.2575482                                   | 1.5690551.0952480.6749217         | 0.3193510.7599457                 | 0.6703624                          |                    |                   |
| 0.8704611                                   | 3.1848287.7001971.0420960.8244113 | 0.629228189                       | 0.3302088                          |                    |                   |
| 1.3406540.4288561.0819040.2676550.367287363 | 0.166181915                       | 0.2562602                         |                                    |                    |                   |
| 0.366900555                                 | 0.6182583                         | 1.7580850                         | 1.5023420.3722498                  | 0.4931856          |                   |
| 0.6739798                                   | 0.9006860.8562205                 | 0.3093026                         | 0.3269111                          | 0.400427657        |                   |
| 1.4778951.2967510.3428179                   | 0.3673416                         | 0.4907328                         | 1.3684920.9073165                  |                    |                   |
| 0.7438234                                   | 1.0910910.6998203                 |                                   |                                    |                    |                   |
| AP005899.1                                  | 0.1905247                         | 0                                 | 0.1259492                          | 0.058174926        | 0.1437141         |
| 0.2956513                                   |                                   |                                   |                                    |                    |                   |
| 0.6230051                                   | 0.2135183                         | 0.1443096                         | 0.07094045                         | 0.4138872          | 0.463726496       |
| 1.0505230.117056507                         | 0                                 | 1.3177730.2994444                 | 0                                  | 0.06044707         | 0.9495599         |
| 0.693365192                                 | 0.1415719                         | 3.2837370.5629353                 | 0.5543585                          | 0.2113405          |                   |
| 0.7496528                                   | 1.1883070.9140357                 | 0.226561074                       | 0.2748624                          | 0.43020193         |                   |
| 0.06387565                                  | 0.9316730.4589176                 | 0.08887348                        | 2.5932670.4907593                  | 0.8426499          |                   |
| 0.8449833                                   | 0                                 | 0.3931640.4546881                 | 1.4884961.2714840.9536680.03416831 |                    |                   |
| 0.1296220.2227783                           | 0.9995784                         | 0.1142558                         | 0.2998817                          | 0.3886089          |                   |
| 0.108355906                                 | 0.1717695                         | 0.3967105                         | 0.5287578                          | 0.1684181          | 0.7306602         |
| 0.9710965                                   | 0.2100171                         | 0.2385167                         | 0.6213278                          | 0.09418186         | 0.3458301         |

0.347973568 0.09121096 1.2922510.3194039 0.286375659 0.3766082  
0.2885609 0.1338057 0.27423267 0.5807227 0.3748807 0.7876549  
0.6519064 0.8042249 0.2073920.9560473 0.2021451 0.1297722  
0.2311461 0 0.6198669 1.1174440.5470041 0.04202419 0.05189565  
0.1354270.503175172 1.4523750.04894311 1.0449540.798000693 1.18941  
0.0912460.5678026 0.6853447 1.1193450.4747221 0.5459750.5942319  
0.3716634 0.07122295 0.599453241 8.7182940.255810888 0.2990837  
0.5863396 0.09674822 0.6147491.3351740.2109538 0.08562021 0.3550675  
0.1133502 0.2058574 0.4186105 0.6400585 0.7445433 0.4630983  
1.8378611.1587480.3344780 0.3557072 0.453006314 0.05344789 0.09510572  
0.09157401 0.3751759 0.21032945 0.4667867 1.04359 0.1390156  
0.5147973 0.2456695 0.3711734 0.3704759 0.2474347 0.1825707  
0.3148417 0.2465755 0.1372099 9.0240250.1192004 0.1215630.2865028  
0.1117459 0.08220672 0.3980815 0.437365166 0.1852927 0.4284668  
0.172728098 0.1551861 0.2354326 0.3317924 0.1564692 0.5108225  
0.8303602 0.670292801 0.04691662 1.3815180.4292244 3.0659620.4429849  
0.7401397 0.5447588 0 0.2163710.601848941 0.7079425 0.1408891  
0.8158544 0.3321339 1.0289520.2789107 0.1441736 0.4951991  
0.2769543 0.3677945 0.5980355 0.2807250 0.3480747 0.06526589 0  
0.4837325 0.4728012 0.226903192 0.6605102 1.8769220.09291553  
0.5520533 0.6313549 1.5880930.274453447 0.1567943 0.2546299  
0.3539539 0.5832583 0.317320914 0.2355339 0.4605846 0.2566782  
0.6264117 0.4321294 1.63833 0.3896150.3953975 0.6090395 0.8167091  
0.4562205 0.6750564 0.4975711 0.38479226 0.846711495 1.256025  
0.340213106 0.121786202 0 0.140259307 0.5731826 0.3759182 0.4683365  
0.762668443 0.5511729 1.4472050.1885542 0.669974547 0.1945483  
0.4704667 0.2580215 1.8060523.5953090.9170182 0.5389529 0.8802055  
0.1229891 1.0146981.2900910.158865209 0.4645302 1.674046558 0.5982472  
0.2576424 0.4708006 0.2483220.5702812 0.2688767 0.2483431 0.23157  
0.9896382 0.489714871 0.3943883 0.8631660.3320931 0.1954274  
0.1297378 0.06858763 0.2209177 1.1309450.4758745 5.1959660.08765061  
0.4011943 0.06777273 0.2344683 0.395730304 0.4495789 0.2329421  
0.6643178 0.5098835 0.6931182 0.1300255 0.8882642 0.1482876  
1.2690860.8384588 0.577253803 0.383082497 0.2549858 0.2823052  
0.3847993 0.9417629 0.6977881 0.1498371 0.1427329 0.1188187  
1.5280640.07839316 1.8347210.7415007 0.8450660.9095377 0.89224  
0.08502748 0.5855268 0.3632682 1.030346521 1.4317540.6407457  
0.1330165 0.04448375 0 0.1183423 1.9892770.1183812 0.6080853  
0.6789063.0199770.35318346 0.08306605 1.4574040.1786204 0.3848859  
0.1180671.328830853 0.3431536 0.08436889 0.6662387 0.14701 0.5112281  
0.2854907 0.502811445 0.1354056 0.8500718 0.2533246 0.2157485  
0.768289912 0.2382393 0.1145114 0.4948437 0.150554963 0.911805659  
0.2998338 1.10357 0.07965419 0.8304856 0.1279518 0.2921651  
1.4182620.1440744 0.1000911.2791650.1762149 0.6168793 0.163484481



0.1666452 8.5361530.1907102 0.4639333 0.4782520.3641996 0.8791207  
0 0.7114627 0.2962989 0.1998051 0.1064683 0.4638033 0.1460338  
0.1470945 0.2338325 0.4004520.6659098 0.6517389 0.6648274  
0.4303633 0.2328543 0.09593575 0.1202210.6062151 0.2306087  
0.7972045 0.1876863 1.0611780.6469528 1.8007541.1959550.4990152  
0.1360496 0.2330506 0.0555496 0.2137412 0.9449201 0.2687471  
0.1033194 0.1891267 0.3253229 0.02964419 0.2060771 0.1828433  
0.7536264 0.2133771.163279004 0.4006210.03771662 0.3171372 0.05833797  
0.1731885 0.339509327 0.358431582 0.08290771 0.28488749 0.2500309  
0.3937791 1.3527611.0195240.2141044 1.03714 0.7715697 0 0.2031425  
0.1334246 0.9166331 0.485812966 0.3019848 0.7551666 0.3549174  
0.2971145 0.5195994 1.6488532.3483491.8048660.1765 0.5132015  
EPB41L4A-AS1 5.6409893.8137184.1593363.217713635 3.343243794 7.99087  
7.3406447.1067892.6449865.2432574.5027564.639483746 4.5018249.489604881  
4.421070629 6.64561214.412227.21631512.734387.5434734.333255989 3.715641  
3.6232450.8531214 5.3027441.9597034.2449053.5348673.4794593.427684765  
4.3764272.085553088 10.9368 3.7541242.5308545.069898915 2.5914942.10236  
2.2504263.4518083.9229137.36118 3.6772863.9954371.9564034.0515975.369492  
3.4722995.6899074.4663784.9503554.1204212.9317661.698094306 11.65937  
5.9843074.7045232.3927725.42017 8.1789222.19513 4.1388552.7651852.068396  
9.0648022.482671293 5.1265795.62095415.036052.921697261 5.8339235.273255  
2.5413483.145146943 4.11157 2.0277644.7207726.04495 3.85016513.9424  
2.56961312.298941.9633477.2761273.319447174 0.8865481 2.1381391.407096  
9.1266898.4254697.7164235.031751722 6.9775512.4523072.8646889.044007853  
5.6552577.2363755.38516 7.0633138.6039583.6186614.0937448.0235533.058369  
4.3507342.398960245 4.0940242.544470291 2.5884346.9074923.0113853.682077  
9.20685 2.3336134.0253797.2780342.26809 2.37770211.970354.2482734.131602  
9.5814414.8679363.4251655.9037778.9882754.4774 3.389961123 13.3162  
6.2144841.5443442.7892265.212279098 2.0386063.1098883.7540852.657569  
2.3912613.4216623.0876171.7550114.6757065.63401 1.81176 3.3749692.156475  
3.31593910.079064.4743785.76721 3.2363495.3606612.102887059 3.978917  
8.3922092.090588503 4.80928410.6474110.633232.6854313.2862397.226914  
2.071814112 3.3277132.82429 2.3120166.32529610.586934.1961325.94991910.2286  
2.1873731.803147105 6.3873777.5100422.0891543.5360524.2728322.557904  
5.3768495.3732662.1682612.8919093.62255 4.5354224.5830465.3156333.158682  
9.5486558.1769513.0227613.303667044 4.7063728.4306832.6905493.771924  
4.60133911.873772.410988178 3.7431834.0525542.2678065.6456056.839859889  
2.7319683.6714544.4261641.90839 3.9660112.5941532.6240293.92709 4.001235  
6.1780725.4698446.4649258.31031 3.484609975 1.868707123 4.2811882.312219214  
2.436889463 10.290623.863730056 5.1844235.70481 2.2380436.630015438  
9.1009464.64349 7.5764511.894767913 6.1293576.1446877.3635762.636636  
3.8692241.4139671.8286823.4031817.9130842.8596036.0731489.051896387 3.69211  
2.779033792 5.4235183.0009791.6939815.2677533.8114253.3735026.30245  
10.146246.19476 5.161253308 2.5503151.24817210.1386410.856974.822646

9.8802284.6936024.0816642.9116647.9141841.90357 3.1980373.5832 13.52175  
7.210244005 2.1726066.2400243.2535012.4884277.0434962.3549753.342401  
2.2579443.0896942.9361896.498386347 6.302073654 11.770225.4191794.576677  
5.2855882.8095152.9006752.2423614.1235974.5510113.6983576.8962594.592758  
1.3701664.7224883.4937056.4803964.8293364.2962993.427461896 4.572528  
3.6938684.6480688.1556383.6529194.3830054.0002345.8159733.30292812.02262  
4.5942092.829692365 6.7903514.7314854.0390434.1495353.7517824.077624499  
2.7553155.6776094.00033 4.0496913.6870392.7958974.533895137 2.74245  
2.54188711.7215 3.6896613.264030347 6.1816844.9272793.7996422.465547619  
1.380132719 2.4811134.8985522.3324584.2017015.3425484.7885714.5794836.24035  
2.1927432.24444 2.7970358.5412041.606371912 3.93769 3.56741 2.993876  
3.8915455.0331754.1947422.2198392.7104388.2464993.4544579.7079133.683429  
10.984825.7847562.4726882.8834133.1770873.64154913.352462.8516544.115106  
9.5350882.2629828.2076273.0078711.7792974.2392029.0758474.1431633.623466  
7.1965138.0702363.5957756.8997976.5114794.5003156.0849764.85496 3.470245  
3.4120133.9443332.8519814.7501627.06696723.0522611.659863.0835886.263895653  
2.0724955.8902891.78636310.486882.8268131.513334397 3.072907698 3.156047  
1.714777332 11.169323.6300531.4304325.7278012.1377153.1602813.558177  
5.9729717.7330231.7038774.6799911.412034369 7.3853825.1119287.238871  
7.4918353.8272462.7469191.4507972.65558 6.3527325.274435  
AL157871.5 0.05555905 0 0.06427426 0 0.058672023 0 0 0.04358498 0  
0 0.1056072 0.047329684 0.2539429 0.079648205 0 0.1793292  
0.3056243 0 0.03084729 0.2692102 0.058972899 0.09632909 0.2331482  
0.1511982 0.3017596 0.3595035 0.1765671 1.0106920.1399349 0  
0.07013374 0.23417621 0.03259696 0.2560118 0.1873555 0.181415283  
0.4159236 0.1669625 0.4300202 0.2874740.04600382 0.1823991  
0.1988880.5197317 0.05407188 0.1871826 0 0.04409905 0.08526599  
0.2040415 0 0.1177195 0.1983145 0.147456192 0 0.5153245  
0.2905917 0.05729795 0.1193183 0.1351552 0.6430541 0.0811464  
0.2264824 0.04806279 0 0.15220929 0.09309336 0.5966545 0.3259957  
0.041755122 0.1281269 0.2945162 0.1365672 0.279892257 0.4123183  
0.09565437 0.2538665 0.2376287 0.2736075 0.1058361 0.3818262  
0.2063170.04415013 0.2123249 0.053953238 0.1581649 0.1629293  
0.4187198 0.04289148 0 0.1727774 0.120837565 0.09461803 0.09990638  
0.3555065 0.203617438 0.7725177 0 0 0.0411464 0.05712228  
0.03460853 0.2026337 0.2425983 0.09483343 0.07269285 0.214138644  
4.4032430 0.1221025 0.3490902 0.06582994 0.2281586 0.3893513  
0.1076537 0.04369361 0.04529941 0.03856319 0.1050529 0 0.06532679  
0.08443435 0.3867183 0.2906155 0.3522823 0.04267262 0 0.1815241  
0 0.1091019 0.4206302 0.0934639 0.03829188 0.071556736 0.256534  
0.2420744 0 0.03502811 0.1671597 0 0.05817258 0.05050825  
0.3194375 0.08033485 0.08388809 0.02800832 4.1287380.1622139  
0.04135727 0.1169662 0.05702604 0.04195165 0.1805765 0.049599052 0  
0.1749238 0.035258569 0.0395972 0 0.12699 0.2794723 0.1421904

|             |             |             |             |             |             |             |
|-------------|-------------|-------------|-------------|-------------|-------------|-------------|
| 0.2542491   | 0.152028052 | 0.1915395   | 0.1880040   | 0.04867586  | 0.3129237   |             |
| 0.2055123   | 0.3021658   | 0.1081114   | 0.1170336   | 0.3154806   | 0.204756613 |             |
| 0.1667430   | 0.04793226  | 0.1233618   | 0.07533077  | 0.6080031   | 0.0711667   |             |
| 0.4782345   | 0.1010838   | 0.07066752  | 0.04170945  | 0           | 0.1074445   | 0.04055525  |
| 0.1776291   | 0.09991926  | 0.1071691   | 0           | 0.6755824   | 0.077195332 | 0.1348283   |
| 0.03547515  | 0.09483311  | 0.2465079   | 0.08591797  | 0.3241736   | 0.035014699 |             |
| 0.04000756  | 0.0866283   | 0.02778914  | 0.1785887   | 0.080967438 | 0.1201974   | 0           |
| 0.1309878   | 0.1453044   | 0.2940318   | 0.4180354   | 0           | 0.06371962  | 0.1912642   |
| 0.0595403   | 0.2328180   | 0.2396480   | 0.16928     | 0.261822376 | 0.086418584 | 0.4273155   |
| 0.115744796 | 0           | 0           | 0.047717988 | 0.3120063   | 0.1096218   | 0.1792507   |
| 0.145951559 | 0.2250192   | 0.2199895   | 0.2245198   | 0.210400435 | 0           | 0.1371932   |
| 0.07524185  | 0.04787857  | 0.2258159   | 0.2034660   | 0.07858225  | 0.4192399   | 0           |
| 0.1218399   | 0.1371579   | 0.162143853 | 0.06773102  | 0.232990277 | 0.1387713   |             |
| 0.1314798   | 0.1130628   | 0.1520681   | 0.1455127   | 0.3773355   | 0.2027747   | 0           |
| 0.2634945   | 0.178507699 | 0.4696156   | 0.04894333  | 0.3841397   | 0.2991909   |             |
| 0.03310383  | 0           | 0.04509539  | 0.1710053   | 0.1349154   | 0.5162407   | 0.04472977  |
| 0.1637896   | 0           | 0.07976908  | 0.572187907 | 0           | 0.2377495   | 0.07137136  |
| 0.02602032  | 0.5187767   | 0           | 0.1576689   | 0.1816175   | 0.2233237   | 0.09008029  |
| 0.157111229 | 0.048873564 | 0.3578412   | 0           | 0.04363786  | 0.6407993   | 0           |
| 0.07646473  | 0           | 0.1212709   | 0.8397848   | 0           | 0.2463929   | 0.1401488   |
| 0.08625064  | 0.3867953   | 0.5082720   | 0.04339113  | 0.4482082   | 0.07415306  |             |
| 0.290099506 | 0.1922767   | 0.04087309  | 0.1629140   | 0           | 0           | 0.7895734   |
| 0.1208244   | 0.2413580   | 0.09898817  | 0.6386755   | 0.090118106 | 0           | 0.2586925   |
| 0.09115338  | 0.1071352   | 0.04016789  | 0.292525616 | 0.2251514   | 0.1148135   |             |
| 0.2781771   | 0.1000293   | 0.02898771  | 0.1165531   | 0.109968946 | 0.1727501   |             |
| 0.2478901   | 0.07387219  | 0.02752514  | 0.271435085 | 0.06078902  | 0           | 0.05050563  |
| 0           | 0.040461887 | 0.08160581  | 0.5363547   | 0           | 0.08476251  | 0.1305924   |
| 0.2193230   | 0.03676194  | 0.2724177   | 0.04662729  | 0.05138616  | 0.4197403   |             |
| 0.100115074 | 0.0425211   | 9.0127460   | 0.1479712   | 0           | 0.1486863   | 0.1560459   |
| 0           | 0.3025607   | 0.4536208   | 0.1019643   | 0.1086656   | 0.6404489   | 0.07452383  |
| 0.4003472   | 0.07159751  | 0.1257589   | 0.05228098  | 0.7483380   | 0.2940375   | 0.19522     |
| 0.1358057   | 0           | 0.08180144  | 0.1325842   | 0.16812     | 0.4068286   | 0           |
| 0.09432922  | 0.1733885   | 0.2929529   | 0.2097175   | 0           | 0.05946507  | 0           |
| 0.4908428   | 0.2411053   | 0           | 0.05272586  | 0.3474539   | 0           | 0.1210239   |
| 0.3365282   | 0.1399626   | 0.2833820   | 0.07259357  | 0.178092996 | 0.1635556   | 0           |
| 0.3641425   | 0.05954195  | 0.08838139  | 0.207909652 | 0           | 0           | 0.193844646 |
| 0.1531146   | 0.1786248   | 1.3806790   | 0.4355851   | 0.1092616   | 0.08142651  |             |
| 0.1711942   | 0           | 0.1130918   | 0.03404456  | 0.2518790   | 0.066111883 | 0.102739    |
| 0.6422931   | 0.09056053  | 0           | 0.2651614   | 0.09349343  | 0.1997345   | 0.4093587   |
| 0.04503564  | 0.3081135   |             |             |             |             |             |
| AC108449.2  | 0.7778771   | 1.5990420   | 0.9309288   | 2.694595144 | 0.821461463 | 1.956318    |
| 1.9296391   | 0.0521192   | 0.6547392   | 0.7265810   | 0.6118332   | 1.051113391 | 4.2229250   |
| 0.538346835 |             |             |             |             |             |             |
| 2.018550417 | 1.5151211   | 0.8971010   | 0.4639694   | 1.4892761   | 1.1957420   | 0.569430351 |
| 2.8834160   | 0.6472292   | 0.7007708   | 0.9833838   | 1.0066750   | 0.6251285   | 2.648882    |

0.81071 0.29770344 0.9819359 1.384959256 0.4091745 2.2954260.7236266  
0.32114668 1.6064290.2149542 1.7992811.1103160.04442036 0.4931385  
1.0882391.54413 1.8795852.1688770.4377505 0.2980680.74098 0.7224006  
0.3377997 0.9320739 0.7180817 0.711903535 0.5501601 3.056605  
0.4810104 1.0511890.9792964 0.6525154 1.6040430.9794165 1.049697  
0.5569014 0.2556135 0.58788081 0.1348336 3.3050954.2494610.483814779  
0.5773446 0.3791718 1.0549321.486420562 2.3887570.9236191 0.7762396  
0.7342383 1.3586910.3065795 0.5735079 1.3945080.3836742 1.890708  
0.312576913 1.1454060.5244042 1.8530750.6212271 1.8155960.8341518  
0.554221929 0.2131762 0.3617534 1.9070550.196608866 1.8648190.3596944  
1.1751050.1589205 0.7170295 0.9356842 0.7337214 1.5616530.7325539  
0.5966213 0.767995167 22.764220.828340017 0.5305485 1.5409120.8898967  
0.9362976 2.2825520.1559223 0.4218967 0.08748039 1.0798390.5748094  
0.4583819 0.6307823 1.7528542.1574652.8061240.3887504 1.606949  
0.2259365 0.5696470.89288201 0.2370298 1.4683960.5113988 0.2957909  
0.345468662 1.6631550.7947232 0.4110025 0.4058692 0.3631636  
0.1828970.1123405 0.5364672 0.7196989 0.6205576 0.5265042 1.46039  
18.890470.5482067 0.3594036 0.9035217 0.4405055 0.08101532  
0.6974438 2.346700051 2.7999781.3089970.408539502 0.5735138 0.8507421  
0.2861108 1.5034652.0594420.7364934 0.770674815 1.10968 0.680748  
0.3290030.9888635 0.9128173 1.0211781.4614620.2260105 1.584033  
0.494272077 0.9660219 0.5091066 0.5657992 0.6546408 0.7471869  
0.2061514 2.2378262.0496940.6482336 0.6443808 0.3466873 1.556193  
0.2349560.3859089 1.25424 0.4139211 0.5633986 1.4910370.596305972  
0.9113126 0.4110490.4120602 0.6460624 0.5392442 2.0032990.135237931  
0.5794573 0.2509396 0.9123093 0.9196884 0.390902575 0.7892093  
0.5043438 0.7588747 0.7856969 1.2066221.6414960.6143495 1.35358  
0.7848937 1.1498182.7426131.1280710.24518 0.821633715 0.584108219  
1.1788781.639158796 0.480084739 0.4194147 0.276453126 0.4142421  
2.8579130.2307745 0.234879774 1.2493250.5765615 0.7432862 0.660264771  
0.8308246 0.4636483 1.0171280.7859198 0.5451081 0.3143402  
0.9105291 1.0698540.4848266 0.8529344 1.5627550.821954778 0.7193967  
0.374951139 0.5359790.8125071.3646390.3426124 0.7025203 0.8611849  
0.1957952 0.1141069 0.4240416 1.447852661 0.4534513 0.897915  
2.0291371.1234720.4155370.4393584 0.6096047 0.5366375 2.136454  
4.0784030.08638031 0.6721458 0.1335810.1925585 1.494981148 0.7036887  
1.14783 0.5513179 0.7537409 3.4609030.7688463 1.1418140.9645139  
0.8625472 0.6088579 1.02399805 0.660678508 0.5654032 0.5564276  
0.5477658 1.6628710.3008579 0.6275787 0.5023727 0.5074191  
3.4751970.8498273 1.3798890.7036894 0.6940156 3.8095135.316752  
0.7960544 4.8182920.7518073 2.065842199 1.1882140.5919933 1.4419760  
0.2837086 0.3110058 4.8466613.3833012.63014 1.1947621.0456950.464086479  
0.4093110.7493647 1.05619 0.4482728 0.5429942 0.770336726 2.294795  
1.3026232.1189730.1448794 0.8956782 0.6189769 0.283156756 0.9341025

|             |             |             |             |             |             |
|-------------|-------------|-------------|-------------|-------------|-------------|
| 0.9574308   | 0.7132949   | 1.4617741   | 1.397825124 | 0.4695732   | 0.2821296   |
| 0.4389049   | 0.544034358 | 0.234415066 | 1.0834581   | 1.9162050   | 0.2747492   |
| 0.5043896   | 0.2879308   | 1.3129980   | 0.4259590   | 0.9864038   | 0.3151566   |
| 3.85028     | 0.451122393 | 0.4105751   | 16.317230   | 0.5638387   | 0.7715412   |
| 1.5074690   | 0.5650303   | 0.2947891   | 0.8764395   | 2.2387030   | 0.5579098   |
| 4.3557180   | 0.8635043   | 0.1449627   | 0.5530648   | 0.5160787   | 0.4543331   |
| 2.6093171   | 1.7035      | 0.5183764   | 0.2950452   | 0.2363634   | 0.1974645   |
| 0.9739995   | 0.3928254   | 0.5548987   | 0.9150736   | 2.0948950   | 0.8036178   |
| 0.9900428   | 1.1282081   | 1.4748560   | 0.6316009   | 1.0401461   | 1.2638611   |
| 0.1018224   | 6.223670    | 0.4987237   | 0.9640805   | 0.9748345   | 0.4504836   |
| 0.8411385   | 1.261061877 | 0.6843457   | 0.7434      | 0.6250820   | 0.22997     |
| 0.803013365 | 0.565179074 | 0.4902369   | 1.3102072   | 0.7392219   | 0.6036678   |
| 5.3326241   | 1.2851430   | 0.6330044   | 0.8648616   | 0.5620255   | 0.3132821   |
| 0.5588366   | 2.3973480   | 0.574526638 | 0.09920273  | 1.81921     | 0.3060519   |
| 1.7353450   | 0.8726618   | 0.9367464   | 1.3439130   | 0.2174275   | 0.7735212   |
| SH3RF3-AS1  | 0.1569266   | 1.0626360   | 0.2242587   | 0.53271404  | 0.243704708 |
| 0.7244349   | 0.3910421   | 0.8320295   | 0.5613907   | 0.1052781   | 1.116644151 |
| 0.8438376   | 0.979265743 | 0.762435259 | 0.5810032   | 0.3046716   | 0.4790108   |
| 0.1127541   | 0.09840272  | 0.489908905 | 0.09602881  | 0.09684228  | 0.06029075  |
| 0.2005460   | 1.075149    | 0.09778705  | 0.1343389   | 0.3254970   | 0.307354674 |
| 0.204265455 | 0.02166356  | 0.1215303   | 0.2801572   | 0.221038613 | 0.1633379   |
| 0.4808326   | 0.1667088   | 0.4776298   | 0.1070076   | 0.04848815  | 0.3745062   |
| 0.5579663   | 0.05390332  | 0.1492793   | 0.1970003   | 0.01465386  | 0.3494453   |
| 0.3390091   | 0.07750019  | 0.6962917   | 0.1482722   | 0.036749135 | 0.101948    |
| 0.1100825   | 0.1793293   | 0.01903978  | 0.4262245   | 0.2844382   | 0.1958763   |
| 0.5797364   | 0.4816563   | 0.1437389   | 0.01466112  | 0.101156548 | 0.8197613   |
| 0.05217496  | 0.06770407  | 0.37462466  | 0.09934358  | 0.1957321   | 0.06807074  |
| 0.201514282 | 1.4728680   | 0.5244590   | 0.4217918   | 0.03158506  | 0.1818364   |
| 0.1409763   | 0.1371159   | 0.1173667   | 0.3292536   | 0.197211868 | 0.04379775  |
| 0.1985151   | 0.5681476   | 0.05701037  | 0.8800259   | 0.02296518  | 0.200768149 |
| 0.04192137  | 0.3651815   | 0.03937759  | 0.135321813 | 0.5317424   | 3.249359    |
| 0.09628573  | 0.1777453   | 0.06643492  | 0.7130133   | 0.1178346   | 0.120921    |
| 0.05252101  | 0.3985644   | 0.660743972 | 0.2743448   | 0.161123495 | 0.08114791  |
| 0.03314305  | 0.4046858   | 0.09476975  | 0.1478620   | 0.2325226   | 0.3339402   |
| 0.0512573   | 0.1163616   | 0.1577474   | 0.02170772  | 0.1262567   | 0.2427303   |
| 0.1668025   | 0.04180763  | 0.6522738   | 0.09071268  | 0.2111180   | 0.556937937 |
| 0.03625393  | 0.6128508   | 0.7867905   | 0.1654142   | 0.190223143 | 0.487113    |
| 1.0618070   | 0.04714742  | 0.2095135   | 0.04165966  | 0.02098071  | 0.05799124  |
| 0.1342688   | 0.1061473   | 0.2002111   | 0.2090665   | 0.1116844   | 9.179340    |
| 0.1236851   | 1.2437510   | 0.09474713  | 0.08364175  | 0.06000452  | 0.032962961 |
| 0.5086040   | 1.05445981  | 0.09210546  | 0.1330791   | 0.1828581   | 0.3184012   |
| 0.6299873   | 0.1408092   | 0.176813174 | 0.06364748  | 0.09370895  | 0.04852413  |
| 0.02835893  | 0.2458461   | 0.3388769   | 0.2566057   | 0.09074237  | 0.4927123   |
| 2.194272197 | 0.5725467   | 0.07963807  | 0.09223291  | 0.3629638   | 0.1653021   |

|            |             |             |             |             |             |            |            |           |           |   |   |   |             |   |   |   |
|------------|-------------|-------------|-------------|-------------|-------------|------------|------------|-----------|-----------|---|---|---|-------------|---|---|---|
| 0.1891863  | 0.1711388   | 0.08397391  | 0.3170125   | 0.06929905  | 0.3698574   |            |            |           |           |   |   |   |             |   |   |   |
| 0.5474488  | 0.1212865   | 0.01475628  | 1.3613060   | 0.1602525   | 0.1193156   |            |            |           |           |   |   |   |             |   |   |   |
| 0.06414062 | 0.487379757 | 0.1642765   | 0.04715275  | 0.2048312   | 0.1872301   |            |            |           |           |   |   |   |             |   |   |   |
| 0.3283256  | 0.09694893  | 0.116351836 | 0.05317713  | 0.1583235   | 0.2677909   |            |            |           |           |   |   |   |             |   |   |   |
| 0.1186881  | 1.560490878 | 0.3275155   | 0.1041388   | 0.2031236   | 0           | 0.0366394  |            |           |           |   |   |   |             |   |   |   |
| 0.06482502 | 0.1057110   | 0.4728785   | 0.0158890   | 0.3363433   | 0.1083097   | 0.1791758  |            |           |           |   |   |   |             |   |   |   |
| 0.02812538 | 0.456760888 | 0.354168931 | 0.08113972  | 0.743585751 | 0.220288259 |            |            |           |           |   |   |   |             |   |   |   |
| 0.3936470  | 0.063425655 | 0.1814363   | 1.0199480   | 0.1687646   | 0.129330309 | 0.1869315  |            |           |           |   |   |   |             |   |   |   |
| 0.1148734  | 0.04263238  | 0.227223288 | 0.2199382   | 0.02279425  | 0.2125207   |            |            |           |           |   |   |   |             |   |   |   |
| 0.5886616  | 0           | 0.3380529   | 0.05222486  | 0.03980314  | 0.5839682   | 0.02024335 |            |           |           |   |   |   |             |   |   |   |
| 0.3463834  | 0.148168549 | 0.3150928   | 0.129035554 | 0.5072420   | 0.1747599   |            |            |           |           |   |   |   |             |   |   |   |
| 0.1033178  | 0.08421893  | 0.1128237   | 0.05699382  | 0.1179165   | 0.2356124   |            |            |           |           |   |   |   |             |   |   |   |
| 0.05837181 | 0.640624512 | 0.3232476   | 0.09758152  | 0.09761272  | 0.2098855   |            |            |           |           |   |   |   |             |   |   |   |
| 0.2420047  | 0.02326164  | 0.2847139   | 0.09944213  | 0.7262723   | 0.04678468  |            |            |           |           |   |   |   |             |   |   |   |
| 0.07431722 | 0.5986899   | 0.4597053   | 0.1325340   | 0.111843976 | 0.3497971   |            |            |           |           |   |   |   |             |   |   |   |
| 0.1843398  | 0.2134466   | 0.09511045  | 0.1567150   | 0.01469947  | 0.02619623  |            |            |           |           |   |   |   |             |   |   |   |
| 0.1508761  | 0.6381989   | 0.3891311   | 0.143569691 | 0.178644456 | 0.1405283   |            |            |           |           |   |   |   |             |   |   |   |
| 0.1196805  | 0.9570403   | 0.0931586   | 0.02958204  | 0.4192451   | 0.4909972   |            |            |           |           |   |   |   |             |   |   |   |
| 0.5775992  | 0.5581114   | 0.1329360   | 0.2128748   | 0.1490261   | 0.3057130   | 0.5655313  |            |           |           |   |   |   |             |   |   |   |
| 0.04222397 | 0.1730235   | 0.9730551   | 0.1478438   | 0.373543807 | 0.5878105   |            |            |           |           |   |   |   |             |   |   |   |
| 0.3531292  | 0.3157898   | 0.06034703  | 0.1301805   | 0.1605441   | 0.5434822   |            |            |           |           |   |   |   |             |   |   |   |
| 0.1806716  | 0.2406057   | 0.0328932   | 0.08304582  | 0.109801009 | 0.4084944   |            |            |           |           |   |   |   |             |   |   |   |
| 0.04298102 | 2.33231     | 0.4390718   | 0.08008536  | 0.353471216 | 0.6151581   |            |            |           |           |   |   |   |             |   |   |   |
| 0.2289111  | 0.1335196   | 0.3157721   | 0.1541192   | 0.03872991  | 0.462865969 |            |            |           |           |   |   |   |             |   |   |   |
| 0.8151351  | 0.2608462   | 0.06136827  | 0.2743934   | 0.180392644 | 0.1615987   |            |            |           |           |   |   |   |             |   |   |   |
| 0.2330208  | 0.3524373   | 0.374447588 | 0.228569303 | 0.47455     | 0.1069366   |            |            |           |           |   |   |   |             |   |   |   |
| 0.1080595  | 0.07041524  | 0.2314406   | 0.0495442   | 0.07287978  | 0.4275523   |            |            |           |           |   |   |   |             |   |   |   |
| 0.6789213  | 0.1549398   | 0.008537664 | 0.5927784   | 0.210695211 | 0.0847771   |            |            |           |           |   |   |   |             |   |   |   |
| 1.0731670  | 0.2748890   | 0.04916998  | 0.04990774  | 0.6546510   | 0.01296329  | 0.2130421  |            |           |           |   |   |   |             |   |   |   |
| 0.1407549  | 0.1842324   | 0.1129405   | 0.1323995   | 0.0277588   | 0.2971661   |            |            |           |           |   |   |   |             |   |   |   |
| 0.0498874  | 0.1903315   | 0.4492315   | 0.01737267  | 0.2210386   | 0.1052229   |            |            |           |           |   |   |   |             |   |   |   |
| 0.3567877  | 0.1692279   | 0.1138788   | 0.02718215  | 0.2202848   | 0.3240188   |            |            |           |           |   |   |   |             |   |   |   |
| 0.05069505 | 0.01591355  | 0.3149131   | 0.1044835   | 0.1152320   | 0.08112214  |            |            |           |           |   |   |   |             |   |   |   |
| 0.1592867  | 0.02307075  | 0.1580792   | 0.9231485   | 0.2718404   | 0.04005896  |            |            |           |           |   |   |   |             |   |   |   |
| 0.03417981 | 0.05256151  | 0.05131419  | 0.5761885   | 0.2211856   | 0.1397830   |            |            |           |           |   |   |   |             |   |   |   |
| 0.2017847  | 0.2050406   | 0.098632135 | 0.3894981   | 0.07675002  | 0.1882261   |            |            |           |           |   |   |   |             |   |   |   |
| 0.03957089 | 0.2447386   | 0.126659839 | 1.507379102 | 0.1124733   | 0.096620196 |            |            |           |           |   |   |   |             |   |   |   |
| 0.2204761  | 0.0148396   | 0.6524810   | 0.1769074   | 0.2723024   | 0.2705756   | 0.4664721  |            |           |           |   |   |   |             |   |   |   |
| 0.1976568  | 0.04384304  | 0.5543278   | 0.0239137   | 0.746932387 | 0.2560469   |            |            |           |           |   |   |   |             |   |   |   |
| 0.2276590  | 0.2256956   | 0.2015340   | 0.07832144  | 0.08284622  | 0.1611858   | 0.1496303  |            |           |           |   |   |   |             |   |   |   |
| 0.3741271  | 0.2866762   |             |             |             |             |            |            |           |           |   |   |   |             |   |   |   |
| AP003171.1 | 0           | 0           | 0           | 0           | 0           | 0          | 0          | 0         | 0         | 0 | 0 | 0 | 0.094837298 | 0 | 0 | 0 |
|            | 0           | 0           | 0           | 0           | 0.05394325  | 0          | 0.6755711  | 1.5767090 | 1.4360520 | 0 | 0 |   |             |   |   |   |
|            | 0           | 0           | 0.07026557  | 0           | 0           | 0.1465674  | 0.09385382 | 0         | 0.1515292 |   |   |   |             |   |   |   |

|             |             |             |            |            |             |             |            |             |            |           |           |   |
|-------------|-------------|-------------|------------|------------|-------------|-------------|------------|-------------|------------|-----------|-----------|---|
| 0.1115176   | 0.1436095   | 0           | 0          | 0          | 0           | 0.6408722   | 0.1083470  | 0.06987804  |            |           |           |   |
| 0.08836388  | 0           | 0           | 0          | 0          | 2.6822780   | 0.3693334   | 13         | 0           | 0          | 0         | 0         | 0 |
| 0.1625979   | 0.09076324  | 0           | 0          | 2.7449171  | 167         | 0           | 0.3146190  | 0           | 0          | 0         | 0         | 0 |
| 0.09347279  | 0           | 0.09583417  | 0.2543437  | 0.1904603  | 0           | 0           | 0          | 0           |            |           |           |   |
| 0.08846623  | 0.1890880   | 1.9015470   | 0          | 0          | 0           | 0           | 0          | 0           | 0.2001883  | 0         |           |   |
| 0           | 0           | 0           | 0.1161220  | 0.08244748 | 0           | 0           | 0.1015073  | 0.08101809  | 0          | 0         |           |   |
| 0.061297474 | 2.20576     | 0           | 0          | 0.09992755 | 1.0552590   | 0.1114523   | 0          | 0           | 0          |           |           |   |
| 0.07727135  | 0           | 0           | 0.5235967  | 0.1691861  | 0           | 0           | 0.1008413  | 0.5130340   |            |           |           |   |
| 0           | 0           | 0           | 0          | 0          | 0.9974602   | 0           | 1.7623970  | 0           | 0          | 0         | 0         | 0 |
| 0.2666983   | 7.4851840   | 0           | 30.164620  | 0          | 0           | 0.3427994   | 0          | 0           | 0          |           |           |   |
| 0.8842037   | 0           | 0           | 0.3173731  | 0          | 0           | 0           | 0.6648024  | 0           | 0          | 0.9594977 |           |   |
| 0.3767147   | 0           | 0.2280086   | 0          | 0          | 0           | 0.07816904  | 0.06321473 | 0           |            |           |           |   |
| 0.2227419   | 0.1920894   | 0.3089841   | 0.4528342  | 0.2768845  | 0.7130047   |             |            |             |            |           |           |   |
| 0.2211385   | 0.2025476   | 0.1416007   | 0          | 0.5036089  | 0.03588215  | 0           | 0          |             |            |           |           |   |
| 1.0010710   | 0           | 0           | 0          | 0          | 1.0451250   | 0           | 0          | 0.070161032 | 0.08016552 |           |           |   |
| 0           | 0           | 0           | 0          | 0.4335241  | 0.6279650   | 2.9115510   | 0.05584282 | 0           | 0          |           |           |   |
| 0.2874356   | 0           | 0           | 0          | 0          | 0           | 0.057720683 | 0.9785572  | 0.077308241 | 0          |           |           |   |
| 0.07912403  | 0           | 0.0781482   | 0.1098279  | 0.1197251  | 0           | 0.5636054   |            |             |            |           |           |   |
| 0.1259446   | 0.1285382   | 0.421591849 | 3.0503610  | 0          | 0           | 0           | 0          | 0           |            |           |           |   |
| 0.3600239   | 0           | 0           | 0          | 0          | 0           | 0.05561286  | 0          | 0.1132753   | 0          |           |           |   |
| 0.1943816   | 0           | 0           | 0.07893112 | 0          | 0           | 0           | 0.09807065 | 0           | 0.3996711  | 0         |           |   |
| 0.07013472  | 0.2710809   | 0           | 0.05406761 | 0.6582686  | 0           | 0           | 0          | 0           |            |           |           |   |
| 0.134885517 | 0           | 0           | 0          | 0          | 0           | 0           | 0.06065296 | 0.08949738  | 0          |           |           |   |
| 0.078703275 | 0           | 0           | 0          | 0          | 0           | 0           | 0.07660846 | 0           | 0.5669946  | 2.4038950 |           |   |
| 0.0987424   | 0.3369895   | 0.2304340   | 1.550089   | 5.0074030  | 0.1197468   | 0           | 0          |             |            |           |           |   |
| 0.5393867   | 0           | 0.05440676  | 0.2729229  | 2.5512450  | 1.5821150   | 0           |            |             |            |           |           |   |
| 0.09917424  | 0           | 0           | 0          | 0          | 0           | 0.3577886   | 0.08048679 | 0           | 0.2005108  |           |           |   |
| 1.2078070   | 1.238667    | 0           | 0          | 0          | 0           | 0           | 0          | 0           | 0          | 0.1218066 |           |   |
| 0.1170944   | 0           | 0           | 0          | 0.2452776  | 0           | 0           | 0          | 0.08722527  | 0          | 0         | 0         | 0 |
| 0.1868597   | 0           | 0.1401764   | 0.06686884 | 0          | 3.3108850   | 0.2371990   |            |             |            |           |           |   |
| 2.2344880   | 0.07816961  | 0.6729171   | 0          | 0          | 0           | 0           | 0.1115918  | 0           | 0          | 0         |           |   |
| 1.1969560   | 0           | 4.35087     | 0          | 0          | 0           | 0           | 0          | 0           | 0          | 0.1260087 | 0         |   |
| 0           | 0.06003191  | 0.2782367   | 0          | 0          | 0           | 0.3220780   | 0.9508495  | 0.0773571   |            |           |           |   |
| 0.5913974   | 0.1818771   | 0           | 0          | 0          | 0           | 0           | 0          | 0           | 0          | 0         | 0         | 0 |
| 0           | 0.4090731   | 0           | 0          | 0          | 0           | 0.1631591   | 0          | 0           | 0          | 0         | 0.3605035 |   |
| 0.198708461 | 0           | 0           | 0          | 0          | 0.4722842   | 0           | 0          | 0           | 0          | 0         |           |   |
| AC005785.1  | 0.6275905   | 0.2229812   | 0.3943903  | 0.04968157 | 0.294557502 |             |            |             |            |           |           |   |
| 0.6372294   | 0.2786920   | 5.470360    | 0.0958540  | 1.278982   | 0.2945508   | 0.158409553 |            |             |            |           |           |   |
| 0.4485748   | 0.877484816 | 0.312864881 | 0.7377507  | 0.9376635  | 1.578451    |             |            |             |            |           |           |   |
| 0.4387869   | 0.9986417   | 0.411205591 | 0.3358412  | 1.0892150  | 4.723144    |             |            |             |            |           |           |   |
| 0.5260266   | 0.4512136   | 0.4842583   | 0.8537355  | 0.4033045  | 0.376218633 |             |            |             |            |           |           |   |
| 0.7042      | 0.636815918 | 1.9728920   | 2.754179   | 0.3265976  | 0.910778768 | 0.3058337   |            |             |            |           |           |   |
| 1.5522591   | 0.0394590   | 9.888844    | 0.6543809  | 0.1933183  | 0.4807586   | 1.42729     |            |             |            |           |           |   |
| 0.3167067   | 1.0337071   | 5.854380    | 3.197931   | 0.2933073  | 0.6070351   | 1.116689    |            |             |            |           |           |   |

|                                    |                                    |                                    |                           |                          |                   |
|------------------------------------|------------------------------------|------------------------------------|---------------------------|--------------------------|-------------------|
| 0.2101333                          | 0.4978098                          | 0.29817247                         | 1.22243                   | 0.4619892                | 1.4704670.2477064 |
| 0.4659096                          | 0.7162305                          | 2.2718330.2150104                  | 0.1642382                 | 0.6568581                |                   |
| 0.7629616                          | 0.693397879                        | 0.2336833                          | 0.4116553                 | 0.4205234                | 0.267857685       |
| 0.5241289                          | 0.7666771                          | 1.1331820.28623902                 | 0.5678143                 | 0.4935635                |                   |
| 0.4366388                          | 0.4109198                          | 0.5886948                          | 1.4169080.7454702         | 1.0549770.1600818        |                   |
| 0.1644996                          | 0.406300917                        | 0.1617514                          | 0.1666239                 | 0.2919645                | 1.10059           |
| 0.5392151                          | 0.7517580.522396411                | 0.4134443                          | 0.2298866                 | 1.14579                  | 1.628016066       |
| 0.8618565                          | 0.8571680.3717607                  | 4.2691490.3505054                  | 0.8590919                 | 1.737895                 |                   |
| 0.5751394                          | 0.8023209                          | 0.2432985                          | 0.230370728               | 2.6097450.426523588      |                   |
| 0.5789485                          | 1.6969380.2019680.5090886          | 0.4343783                          | 0.9458147                 | 0.1462398                |                   |
| 1.3518950.9895261                  | 0.2246369                          | 1.0857250.3279672                  | 0.3650206                 | 0.4074719                |                   |
| 0.5010736                          | 1.1229210.2380377                  | 0.5982412                          | 0.3797188                 | 0.515825086              |                   |
| 0.6770625                          | 0.3790294                          | 0.2519922                          | 0.2136009                 | 0.33928602               | 0.2657582         |
| 0.4996283                          | 1.3257040.9378955                  | 0.3613266                          | 0.6163563                 | 2.4256380.5494061        |                   |
| 0.3192564                          | 0.7170022                          | 0.1871789                          | 0.2421671                 | 2.3916873.8230621.061222 |                   |
| 1.2233710.2624362                  | 0.5616384                          | 3.6892260.179838738                | 0.2637342                 | 1.731983                 |                   |
| 0.167178383                        | 0.3423676                          | 0.7372208                          | 1.0743750.2449796         | 0.7006343                |                   |
| 0.8036809                          | 0.614834539                        | 0.5475815                          | 0.9569657                 | 0.6380842                | 0.5316025         |
| 0.7795488                          | 0.2844367                          | 0.4695334                          | 0.5657950.08799119        | 0.171326962              |                   |
| 2.6353710.3342215                  | 0.2494509                          | 0.1996009                          | 0.8478955                 | 0.4168335                |                   |
| 1.2620290.7894163                  | 0.1773899                          | 1.6402880.8311786                  | 0.5593935                 | 0.656057                 |                   |
| 0.6935993                          | 0.2786864                          | 1.9428951.7275471.7093090.23683738 | 1.103085                  |                          |                   |
| 0.6629267                          | 0.3967508                          | 3.5359140.6350332                  | 0.1537068                 | 0.195320088              |                   |
| 1.8857982.2711940.2867763          | 0.2656557                          | 0.587151623                        | 0.5095716                 | 1.281999                 |                   |
| 0.54801                            | 0.8672797                          | 0.6765731                          | 1.0804460.2440038         | 0.2784302                | 1.24029           |
| 0.9631758                          | 0.4805236                          | 0.7436018                          | 1.2983890.273844832       | 0.257100187              |                   |
| 4.9546180.408912455                | 0.208011598                        | 1.6300130.292800171                | 0.8919773                 | 0.6114959                |                   |
| 1.7998240.705598015                | 2.6045590.4470342.3885510.32275713 | 0.2584475                          |                           |                          |                   |
| 1.5497230.3147874                  | 0.6142788                          | 0.2519306                          | 1.9748660.5698550.9688556 |                          |                   |
| 0.7877481                          | 0.4672601                          | 0.3748981                          | 1.537609059               | 0.8689844                | 0.162459206       |
| 1.2385570.4693918                  | 0.2128581.9792990.7981749          | 1.0524321.49874                    | 1.626039                  |                          |                   |
| 0.9063972                          | 0.497878616                        | 0.9168685                          | 0.4914310.3025157         | 2.6796020.4985842        |                   |
| 0.9957588                          | 0.9181667                          | 0.9181355                          | 0.2634063                 | 0.8508234                | 0.3493182         |
| 0.1142071                          | 0.5209031                          | 0.4449704                          | 1.17345459                | 0.2710177                | 0.7515256         |
| 0.7663924                          | 0.1524047                          | 1.5653130.2837744                  | 0.4067750.3123739         | 0.7723657                |                   |
| 0.5904242                          | 0.372471178                        | 0.681570114                        | 0.9708406                 | 1.26572                  | 0.6572396         |
| 0.5026678                          | 0.6207430.2452593                  | 0.3714876                          | 0.4509847                 | 0.2453793                |                   |
| 0.3570560.7696843                  | 0.3283487                          | 0.4650885                          | 0.7551717                 | 0.4548227                |                   |
| 0.5688076                          | 0.5750480.4860305                  | 0.313534415                        | 4.6120250.2165995         | 0.2877779                |                   |
| 1.4309290.6282862                  | 1.7180990.2044911                  | 0.05054897                         | 0.6731755                 | 1.44947                  |                   |
| 0.7667506                          | 0.284863129                        | 0.6148018                          | 0.4329140.6991526         | 1.0458440.6721974        |                   |
| 0.289269301                        | 0.1465271                          | 0.3122223                          | 1.3965630.4324396         | 0.3314853                |                   |
| 0.4551119                          | 0.500969645                        | 0.2120008                          | 1.1408011.2259270.2226353 | 0.395355562              |                   |
| 2.8653551.1898160.6057240.32857905 | 0.090282307                        | 0.1536354                          | 0.2917113                 |                          |                   |



|             |             |             |             |             |             |            |
|-------------|-------------|-------------|-------------|-------------|-------------|------------|
| 0.3174497   | 1.1938830   | 0.8863110   | 0.4990198   | 1.85962     | 0.3281065   | 0.1804536  |
| 0.6502445   | 0.3726371   | 0.3219436   | 0.753927803 | 0.0948772   | 8.489271    | 1.370798   |
| 0.5200131   | 0.3141759   | 0.4250711   | 0.0554330   | 0.4427853   | 1.1476730   | 0.5623115  |
| 1.0238050   | 0.8991397   | 0.5747181   | 0.8522079   | 1.1584880   | 0.2928841   | 0.7453569  |
| 0.1895631   | 0.75093     | 0.2775738   | 0.5581035   | 0.9942914   | 1.1333571   | 0.608483   |
| 0.3574662   | 0.2719655   | 1.7304050   | 0.45414     | 0.2265623   | 0.8594440   | 0.8414648  |
| 1.6750130   | 0.1671218   | 0.2130091   | 0.1741477   | 0.7906589   | 1.0952141   | 0.591514   |
| 0.7841622   | 0.3823522   | 2.4657930   | 0.6071030   | 0.4894471   | 1.30233     | 8.471071   |
| 2.5179410   | 0.3543257   | 0.662295948 | 0.3497345   | 0.7730426   | 0.5078178   |            |
| 2.6903240   | 0.2218553   | 0.086982609 | 0.499966104 | 0.3776184   | 0.094614649 |            |
| 0.4982301   | 2.0177320   | 0.1925437   | 0.8909246   | 0.1523716   | 0.1362648   |            |
| 0.4583812   | 1.4780491   | 0.1407910   | 0.4652757   | 0.5218717   | 0.295029901 | 1.103222   |
| 1.1704010   | 0.5430551   | 0.4059788   | 0.7560007   | 0.4606831   | 0.3342495   |            |
| 1.0618260   | 0.7536577   | 1.374983    |             |             |             |            |
| LSAMP-AS1   | 0           | 0           | 0.1238994   | 0.057228137 | 0           | 0          |
| 0           | 0.4580451   | 0.045617941 | 0           | 0           | 0           | 0          |
| 2.4390540   | 0.056840064 | 0.09284522  | 0.1685371   | 0.02914598  | 0.07271152  | 0          |
| 0.3119990   | 0.08991599  | 0           | 0.1013959   | 3.18811007  | 0.03141804  | 0          |
| 2.739381709 | 1.0204250   | 0           | 0.1847181   | 0.1330201   | 0.4570863   | 0.9584745  |
| 0.1541338   | 0           | 0           | 0           | 8.6708450   | 0.1643645   | 0          |
| 0.04778554  | 0.035530809 | 0.08448697  | 0.5321647   | 1.64048     | 0.08283854  |            |
| 0.1725045   | 0.08684473  | 0.1549493   | 0           | 0.08731653  | 0           | 0          |
| 0.1210686   | 0           | 0           | 0.1234930   | 0.2961631   | 0.629462332 | 0          |
| 2.6568010   | 0.8664825   | 0           | 1.1040510   | 0.2978736   | 2.1146740   | 0          |
| 0.1345254   | 0           | 2.0165170   | 0.03330574  | 0.145584137 | 0           | 0          |
| 1.439191123 | 0.1063684   | 0.1346415   | 0.05585617  | 0.03965828  | 0.3303382   |            |
| 0.1000706   | 0.2441315   | 0.07794145  | 0.6398256   | 0.2452233   | 0           | 0.08841654 |
| 0.179748286 | 0           | 0           | 0.06344911  | 0           | 1.0722      | 0.7263218  |
| 1.8337661   | 0.407180    | 0.06750235  | 0           | 0.4407491   | 0.2848323   | 0          |
| 0.2667826   | 0.08225861  | 0.4134680   | 0.3061783   | 0           | 0.1840231   | 0          |
| 0           | 0.896594256 | 0           | 0           | 0           | 0.1688064   | 0          |
| 0.4258618   | 0.1212812   | 0           | 33.304660   | 3.7868450   | 0.05636799  | 0.9343814  |
| 0.04043441  | 0.04351141  | 0.430247107 | 0           | 0           | 0           | 0.1526605  |
| 0           | 0.3197784   | 0           | 0           | 0.2307653   | 0.04530113  | 0.6568160  |
| 0           | 0.0376003   | 0           | 0.049337828 | 0           | 0           | 0.2675255  |
| 1.4182720   | 0           | 0           | 0           | 0.03451953  | 1.05539     | 1.2840370  |
| 0.297613831 | 0           | 0.03419214  | 0           | 0           | 1.8218340   | 0.09373483 |
| 2.2543720   | 0           | 0           | 0.06951019  | 0.3524023   | 0           | 0.7002465  |
| 0.3449467   | 0.08188682  | 0           | 0           | 1.2566281   | 2.992670    | 0.1223683  |
| 0.0588373   | 0           | 0.359412445 | 1.2940280   | 0           | 0           | 0.02879465 |
| 0           | 0.1854855   | 0.050697754 | 0.1275882   | 5.785120    | 0           | 0.3808857  |
| 1.3633240   | 0.02886268  | 0.06049374  | 0           | 0           | 0.039069925 | 0          |
| 0.5068986   | 0.5176252   | 1.5633960   | 0.32725     | 0.0330626   | 0           | 0          |
| 0.06466161  | 0.1415197   | 0           | 0.1602057   | 0.2871593   | 0.3036212   | 0          |

0.05201441 0 0 0.4735979 0.06666974 0 0.129763282 0.2341387 0  
0.03439506 0.02507926 0.04545586 0 0.4938914 0 0.2152469 0  
0.378572717 0 0.5016718 0.1388553 0 0.3474135 0.2145099 0  
0.7221085 0 0.6166955 1.3109950.7124452 0.6213688 0.02771042 0  
0.5103017 1.4637640.2015991 2.6444350.034950958 0 0.5909228 0  
1.3127930 0 0.2717919 0.6987275 0 0.7155610.6691054 0 0 0  
0 0.03442017 0 0 0.4099050.2489874 1.6086990 0 0.4493510  
0.03330048 0.07964162 0.4984035 0 0.029068696 0.4687240 0  
0.345577636 0.038998528 0 1.8093490.3526102 1.2663030.08391292  
0.07185253 0.2959472 0.2834591 0 0.94376 0.2724024 0.1348533  
0.932777999 0.2458996 4.3433940 0.08557178 0.1809494 0 0.1128017  
0 0 0.9715888 0.1965533 0.03491184 0.1878697 0.1436571  
0.9646702 0.9661132 0.4242374 0 0 0.1308015 0.2351995  
5.1375923.20873 0 0.04259636 0.03240794 0 0.6923691 0 0 0  
0.1411789 0.6063982 1.7733190 0 0 0.0387309 0 0.8131034  
0.03720975 0.9245264 3.1203050.6487144 0.5396027 0.7413612  
0.1399362 0.05721734 0 0.07420557 0.1559879 0.05738853 0  
0.033398386 0.282078525 0 5.231351713 0.6395004 4.7775683.3268630 0  
0 0.06600108 0.5211926 0.07266778 0.2296931 0.2427694 0.031860428  
0.04951167 0.2476255 0.1309279 0 0 0.03003737 0.02750154  
0.8285627 0.04340687 0.1781821  
CARMN 0.4634589 4.0270110.1302715 3.669956642 0.082553859 0.602208  
2.9305464.1453323.9079512.2105480.8738717 0.575568816 1.4528620.832506468  
3.622974781 0.2688445 0.3568919 0.1573977 0.1178091 0.02705639  
0.045439898 0.1468337 0.02050305 0.04153531 0.005054616 0.2661659  
0.02366066 0.02902213 0.05000482 0.082630949 0.6050082 0.075509317  
0.02074855 0.03063084 0.1569146 0.014181027 0.1697394 0.06525635  
0.1512639 0.5874696 0.0539410.02688639 0.1465845 0.6080632  
0.003622918 0.05894547 0.06892935 0.01181888 0.006665146 0.08430553  
0.0325556 0.02129605 0.05481071 0.024699607 0.08516138 0.01726386  
0.005562911 0.01631605 0.07195097 1.08215 0.01974768 0.1427203  
0.04704171 0.07084654 0.02660566 0.052691266 0.1543764 0.008416205  
0.009556019 0.43783565 0.0143079 0.006577713 0.02401943 0.042194945  
0.08028837 0.05287444 0.1814350.02069804 0.3051005 0.01418244  
0.1691326 0.06220632 0.1005768 0.03240404 0.025304781 0.06535031  
0.03638858 0.1905403 0.02155358 0.01419547 0.03588688 0.11132474  
0.01373577 0.02175523 0.006616557 0.040928257 0.05176015 0.1497558  
0.1941450.04135329 0.02392063 0.04985499 0.04582185 0.02438181  
0.02541608 0.06575253 0.126054731 15.959040.116207097 0.04908658  
0.03174317 0.4090952 0.0210197 0.01956545 0.02344225 0.03659443  
0.0166933 0.01808664 0.0539637 0.03498799 0.03282764 0.01272884  
0.06765612 0.03363309 0.02444656 0.1887036 0.002612968 2.041773  
0.305914509 0.01279256 0.2016170.1064584 0.2976128 0.134244215  
0.07120851 0.2189624 0.1473513 0.04224509 0.06860011 0.1057607

|             |             |             |             |             |                      |
|-------------|-------------|-------------|-------------|-------------|----------------------|
| 0.0107186   | 0.07106711  | 0.01248503  | 0.04171504  | 0.05480144  | 0.01032136           |
| 7.8202090   | 0.02445444  | 0.04295073  | 0.07053262  | 0.008596917 | 0.04918969           |
| 0.07108141  | 0.02658584  | 0.03801353  | 0.2373345   | 0.015355539 | 0.08357225           |
| 0.08318324  | 0.03261617  | 0.6366557   | 0.0508108   | 0.02555276  | 0.077669517 0        |
| 0.003149155 | 0.01956825  | 0.007624173 | 0.04681703  | 0.3834026   | 0.07191927           |
| 0.02483132  | 0.8518532   | 0.109752633 | 0.1191690   | 0.01445198  | 0.01756413           |
| 0.02397469  | 0.02407207  | 0.1382808   | 0.07764172  | 0.01354561  | 0.439158             |
| 0.03074073  | 0.4197901   | 2.9251870   | 0.05298693  | 0.005950742 | 0.4686345            |
| 0.03231238  | 0.01052542  | 0.05981485  | 0.043963979 | 0.3191926   | 0.06655325           |
| 0.09848696  | 0.06724571  | 0.2058008   | 0.06081668  | 0.01524933  | 0.002680582          |
| 0.05804259  | 0.01396443  | 0.07977184  | 0.811033164 | 0.1570423   | 0.2834723            |
| 0.06874867  | 0.01362994  | 0.02955102  | 0.01867277  | 0.01332185  | 0.01138489           |
| 0.02402825  | 0.3271236   | 0.0124794   | 0.01906753  | 0.0141776   | 0.07455602           |
| 0.026055936 | 0.02454081  | 0.045238198 | 0.059686211 | 0.2658985   | 0.007992988          |
| 0.01698532  | 0.9823763   | 0.01901605  | 0.068453208 | 0.03957636  | 0.04211346           |
| 0.02793747  | 0.084583355 | 0.1042156   | 0.009192202 | 0.1575421   | 0.01844574           |
| 0.009456306 | 0.0654365   | 0.03685611  | 0.04213479  | 0.1072347   | 0.001020438          |
| 0.1792018   | 0.078763593 | 0.04084295  | 0.122284505 | 0.8144995   | 0.4290175            |
| 0.01325699  | 0.05094425  | 0.0129995   | 0.02183462  | 0.2768207   | 0.254693             |
| 0.01324097  | 0.417416299 | 0.1134992   | 0.04591013  | 0.05223317  | 0.01447792           |
| 0.1064649   | 0.01289844  | 0.1042409   | 0.05155954  | 0.1120909   | 0.02515571           |
| 0.004495468 | 0.09053727  | 0.1436731   | 0.09887656  | 0.010148206 | 0.03436128           |
| 0.06106371  | 0.04303814  | 0.04445697  | 0.01737951  | 0.01037371  | 0.04093594           |
| 0.03042179  | 0.07780815  | 0.02715997  | 0.035527776 | 0.009823863 | 0.1220598            |
| 0.007239504 | 1.2747850   | 0.2066235   | 0.0730682   | 0.3573489   | 0.05368409           |
| 0.03520997  | 2.0470530   | 0.12062     | 0.1700405   | 0.007512189 | 0.06067904 0.6349423 |
| 0.005675864 | 0.2907288   | 0.03703798  | 0.06334704  | 0.12634189  | 0.05539647           |
| 0.01369287  | 0.3147316   | 0.01368903  | 0.01148387  | 0.1106015   | 1.936624             |
| 0.02023865  | 0.0358082   | 0.008290492 | 0.01488433  | 0.033209457 | 1.238337             |
| 0.02166611  | 0.06565507  | 0.1316014   | 0.0497895   | 0.163925331 | 0.1106275            |
| 0.02500133  | 0.08180182  | 0.09215459  | 0.07380479  | 0.003904637 | 0.153502641          |
| 0.2245469   | 0.09827055  | 0.01361133  | 0.07838004  | 0.018186663 | 0.03462032           |
| 0.04502725  | 0.3570091   | 0.463304272 | 0.060998012 | 0.1175565   | 0.01078103           |
| 0.05174769  | 0.05253304  | 0.02624982  | 0.03995922  | 0.01469506  | 0.07635669           |
| 0.2030591   | 0.04217557  | 0.01377188  | 0.005859039 | 0.081612768 | 0.01424497           |
| 10.228060   | 0.0766197   | 0.1150065   | 0.08427852  | 0.2814340   | 0.0248315 0.01125053 |
| 0.02229935  | 0.04221312  | 0.05009987  | 0.04004438  | 0.02705277  | 0.04493913           |
| 0.04526553  | 0.02158726  | 0.05792934  | 0.0140117   | 0.01114224  | 0.0181856            |
| 0.1308011   | 0.04208396  | 0.0196816   | 0.006851063 | 0.05033921  | 0.06195396           |
| 0.01703643  | 0.01604358  | 0.06576501  | 0.01896071  | 0.0360138   | 0.0228998            |
| 0.01505514  | 0.01395556  | 0.04083879  | 2.8205650   | 0.0566394   | 0.03365523           |
| 0.02412136  | 0.2914504   | 0.01810672  | 0.0593256   | 0.05676182  | 0.06200707           |
| 0.03282216  | 0.06509872  | 0.07174261  | 0.021876372 | 0.08675504  | 0.04900553           |
| 0.02168732  | 0.0359048   | 0.3089164   | 0.051077909 | 0.278202383 | 0.09213126           |

0.019481935 0.02222776 0.007480126 1.5726380.07782673 0.07595257  
0.08183594 0.2695528 0.1340556 0.01389183 0.2030134 0.01326  
0.031007346 0.1479997 0.02582091 0.01820318 0.04876338 0.169767  
0.06681852 0.02102978 0.0137139 0.2670463 0.1228329  
AC020765.2 0.4455656 0.6341027 0.1982534 0.366286574 0.289557297  
0.5318595 0.5603750.9679498 0.3028721.1017660.5211913 0.817532637  
0.6266275 0.442213472 0.943631292 0.2765697 0.7002879 2.898377  
0.7992447 2.8564952.546619069 1.36678 2.55296 0.4477147 2.187321  
0.9758191.6338592.63649 1.0359070.47549855 0.6922461.48074442 1.689156  
0.9024753 0.5778962 0.820708182 0.6997704 3.5706271.2379672.009878  
1.3054650.2250434 2.7810550.9372014 0.3335684 2.7713430.6023746  
0.6529109 1.0169420.6713218 0.7673475 1.2200320.3058496 0.54579271  
1.2978140.5903908 1.0755930.3888172.7234681.55637 1.1900970.2502953  
0.4470930.4743975 4.5182060.688582616 0.6891495 1.1235981.055807  
0.515173144 0.9484946 0.3633731.6428370.23022002 0.9856389 3.363513  
1.3050811.40729 3.95446 1.6322520.1046879 1.5273190.3268336 1.07697  
0.266269223 0.2601911 0.1675180.4305125 1.9580163.1041294.135539  
0.857261404 1.7121771.6948821.4620754.187040673 1.6339360.9192189  
0.7865118 4.1628340.5990567 1.5798953.5626252.5940790.7800342  
0.5829731 0.377433522 0.7922695 1.196491135 1.1298721.5997660.8122073  
0.3518766 4.6322381.9923410.3773631 4.0799883.0926431.5985713.104264  
0.4835997 0.5729613 1.0602921.0756812.3905450.3685452 6.736256  
0.6159004 2.495729228 3.7354140.2794464 0.1921924 0.6614212  
1.500869409 0.2712949 0.5376068 5.2516990.7779161.0827662.181216  
3.6963151.1217040.1313736 2.2796870.05175041 0.5874615 0.5485869  
1.7011813.8269831.5152811.0553780.9316762 0.8911782 0.795536639  
1.3999891.7265623.610656986 1.2702270.2964707 4.9092980.4433295  
2.1052080.2091277 0.375143296 1.0634432.3195861.8617390.8072667  
1.0649540.6058180.5907158 1.6364830.2724672 0.631569876 3.223055  
0.5913864 2.4733030.09294283 0.9547389 1.1414680.8623719 3.11792  
0.3051626 0.5660706 0.7973807 0.9500463 1.1508490.4383162  
0.4931201 3.8345190.6091446 3.4532 0.285729945 1.5526079.016435  
0.7605308 2.9110590.9010448 1.0799031.166427151 1.57955810.31408  
0.3085752 0.7344734 0.699281273 0.3262581 0.7733272 1.292898  
1.3624981.4964480.5501552 0.2453131 0.3930852 3.0677542.718042  
0.6893999 1.7371021.5664280.161517739 0.248786834 3.4645910.952036674  
0.562321477 3.8001510.176622831 1.2029760.9467572.3590280.900372467  
3.7479761.5122092.1765212.271423678 0.6532982.3697581.2532470.5316516  
2.9950662.3095270.2908635 1.7734510.5420631 4.5097680.3722947  
2.300603586 4.3454471.533133548 1.2327522.2386261.1159724.0025831.735485  
4.8671671.5636422.2356510.7043802 2.598857223 1.0346612.0531270.5854678  
0.65625 2.3689160.7773264 1.50224 2.9010530.2330414 1.3896782.483434  
0.4546868 0.2560303 2.6573080.996654099 0.7659493 0.9777815  
0.5723751 0.3210378 2.1529451.1461514.5228530.8216237.4945770.9446962

|             |             |             |             |             |             |             |
|-------------|-------------|-------------|-------------|-------------|-------------|-------------|
| 0.290764878 | 0.603000226 | 0.9632795   | 6.6655392   | 1.5360905   | 4.35484     | 1.09837     |
| 0.99059     | 0.6419206   | 1.2967380   | 6.907489    | 1.1846081   | 7.631920    | 4.495793    |
| 0.3547191   | 1.0498981   | 5.6776      | 1.0707162   | 2.2857230   | 9.148977    | 0.715847391 |
| 2.1825190   | 5.547197    | 0.1005014   | 1.9045630   | 3.625166    | 7.5008540   | 6.262539    |
| 0.1490726   | 1.0209831   | 1.1602470   | 4.453887    | 0.704186776 | 1.2029190   | 1.595869    |
| 0.7310205   | 1.2337081   | 2.389750    | 5.24970213  | 0.1851940   | 3.187269    | 5.758366    |
| 0.9873263   | 0.9298882   | 1.2223230   | 5.87943542  | 0.1705108   | 1.1214351   | 2.76005     |
| 0.6452479   | 0.669791205 | 3.1500530   | 8.651974    | 1.3085870   | 5.68763192  | 1.148199719 |
| 0.2265411   | 0.5294020   | 9.529001    | 0.8366373   | 1.0741630   | 2.759337    | 0.9200397   |
| 1.0432050   | 3.781214    | 1.3231570   | 3.170003    | 0.8199671   | 2.388084415 | 0.1573871   |
| 0.7413262   | 1.4409210   | 9.493449    | 0.4632640   | 5.044838    | 0.9626443   | 1.243027    |
| 2.31445     | 5.5967561   | 8.031790    | 8.938077    | 0.4466254   | 2.9423110   | 6.791769    |
| 0.2944558   | 1.2412871   | 0.320652    | 6.673020    | 5.581267    | 1.2043093   | 3.3092410   |
| 2.1699162   | 7.808920    | 7.467329    | 9.0349840   | 8.272102    | 1.5033351   | 0.8624211   |
| 2.2891470   | 2.587486    | 0.08566085  | 0.9904651   | 1.2591241   | 0.7662210   | 4.1162      |
| 1.4382950   | 5.854768    | 1.00027     | 0.4096659   | 0.3359675   | 2.28364     | 8.4040211   |
| 0.7165254   | 0.732434929 | 0.5044856   | 4.84449     | 1.2479942   | 5.711920    | 1.453928    |
| 0.256518158 | 0.496494117 | 0.5742127   | 0.119582403 | 2.7077422   | 2.2589630   |             |
| 1.3435580   | 3.707179    | 0.5023186   | 0.7181437   | 1.5345022   | 2.2325160   | 2.940284    |
| 0.8435114   | 0.774901669 | 5.4506391   | 1.1094422   | 1.787980    | 4.489730    | 3.998563    |
| 0.5767593   | 0.2464316   | 1.0606370   | 8.890369    | 7.86909     |             |             |
| GRK5-IT1    | 0.03701622  | 0.2282770   | 0.08564545  | 0.0791179   | 0.117270705 | 0.2297633   |
| 0.2420820   | 1.161540    | 0.06542035  | 0.06431934  | 0           | 0.18920041  | 0.1879883   |
| 0.424524933 | 0.135882906 | 0.05973905  | 0           | 0           | 0.2055201   | 0           |
| 0.03883375  | 0.08058864  | 0           | 0.04790384  | 0.03921261  | 0           | 0           |
| 0.2336330   | 0           | 0           | 0           | 0           | 0.09550032  | 0           |
| 0.07205078  | 0           | 0.5111579   | 0           | 0.1514892   | 0.09062844  | 0           |
| 0           | 0           | 0.0980957   | 0           | 0.07634952  | 0.03974791  | 0           |
| 0           | 0.067606293 | 0.2480938   | 0           | 0           | 0.111277399 | 0.1138194   |
| 0.09098788  | 0.062159405 | 0.03433839  | 0           | 0           | 0           | 0.1041663   |
| 0           | 0           | 0           | 0.07189269  | 0.03512579  | 0           | 0.04649535  |
| 0.09209036  | 0           | 0.04202617  | 0           | 0           | 0           | 0.07352713  |
| 0.06750237  | 0.1616311   | 0           | 0           | 0.04076282  | 9.7788690   | 0           |
| 0           | 0.05822174  | 0           | 0           | 0.2333050   | 0           | 0           |
| 0.06047022  | 0           | 0           | 0           | 0.1245407   | 0           | 0           |
| 0           | 0           | 0           | 0.1070462   | 0           | 0.1119632   | 19.551640   |
| 0           | 0.05590057  | 0.06015453  | 0           | 0           | 0           | 0.046982043 |
| 0           | 0.7905029   | 0.050644345 | 0           | 0.1252576   | 0           | 0           |
| 0.02057978  | 0           | 0.1261134   | 0.341047733 | 0.07406168  | 0.3832184   | 0.04109489  |
| 0           | 0.07365128  | 0           | 0.09803807  | 0           | 0.04708223  | 0.1111557   |
| 0           | 0           | 0.04438081  | 0           | 0.1196138   | 0           | 0           |
| 0           | 0           | 0           | 0.05331007  | 0           | 0.1110871   | 0           |
| 0           | 0           | 0.07427096  | 0           | 0.02830213  | 0           | 0           |
| 0.153537018 | 0           | 0.05140998  | 0           | 0.1052350   | 0           | 0           |

|             |                     |             |                    |                   |                    |             |            |             |            |            |
|-------------|---------------------|-------------|--------------------|-------------------|--------------------|-------------|------------|-------------|------------|------------|
| 0           | 0                   | 0           | 0                  | 0                 | 0                  | 0.05012989  | 0.09569729 | 0.07522492  | 0.05422368 | 0          |
| 0           | 0.1672652           | 0           | 0.03655257         | 0                 | 0                  | 0           | 0.03698255 | 0           | 0.03766405 | 0          |
| 0           | 0                   | 0           | 0                  | 0                 | 0.190289207        | 0.08939468  | 0.06521698 | 0           | 0          | 0.04411086 |
| 0           | 0                   | 0.05696613  | 0.1438199          | 0                 | 0                  | 0.05456242  | 0          | 0.05314615  | 0          | 0          |
| 0           | 0.09510233          | 0.1040162   | 0.06284272         | 0                 | 0.05252345         | 0           | 0          | 0           | 0          | 0          |
| 0.195372073 | 0                   | 0           | 0.2325898          | 0                 | 0                  | 0.05094463  | 0.02773097 | 0.05386449  |            |            |
| 0.9591542   | 0.1066147           | 0.06566369  | 0                  | 0.03830966        | 0                  | 0.02821968  | 0          |             |            |            |
| 0.03981582  | 0                   | 0.193278796 | 0                  | 0.05446339        | 0                  | 0           | 0          | 0.9769561   |            |            |
| 0.08049923  | 0                   | 0           | 0.080054918        | 0.05648491        | 0                  | 0           | 0.04758589 | 0           |            |            |
| 0.035435489 | 0                   | 0           | 0.2665781          | 0                 | 0                  | 0.04884454  | 0.1841516  |             |            |            |
| 0.05505227  | 0.9351296           | 0.1100317   | 0.080374945        | 0                 | 0.07786777         | 0           | 0          | 0           |            |            |
| 0.1631096   | 0                   | 0           | 0.05647302         | 0                 | 0                  | 0.1168992   | 0.09797056 | 0           |            |            |
| 0.06213086  | 0                   | 0           | 0                  | 0                 | 9.4074290.06484146 | 0.03943433  | 0.05003251 | 0           |            |            |
| 0.05198279  | 0                   | 0           | 0                  | 0                 | 0                  | 0.1333657   | 0          | 0           | 0.0553978  |            |
| 0.06027768  | 0                   | 0           | 0                  | 0                 | 0.04480398         | 0.06776238  | 0.1276267  |             |            |            |
| 0.09020011  | 0.0418979           | 0.04620803  | 0                  | 0.03992122        | 0                  | 0.1584744   |            |             |            |            |
| 0.2266424   | 0                   | 0.05354547  | 0                  | 0                 | 0.05144247         | 0.2457996   | 0.04031609 | 0           |            |            |
| 0.4351671   | 0                   | 0           | 0                  | 0                 | 0.05391332         | 0           | 0          | 0.146240086 | 0          |            |
| 0.064574498 | 0                   | 0           | 2.7596330.06449079 | 0.1091933         | 0.05425041         | 0.1368697   |            |             |            |            |
| 0           | 0                   | 0           | 0.044047042        | 0                 | 0                  | 0           | 0.03925862 | 0           | 0.07604176 |            |
| 0.05454705  | 0                   | 0           |                    |                   |                    |             |            |             |            |            |
| AC024270.4  | 0.1055094           | 0.5060772   | 0.12206            | 0.150342803       | 0.037140366        | 0.272878    |            |             |            |            |
| 0.1150033   | 0.1655401           | 0.06215711  | 0.2138885          | 0                 | 0.299604767        | 0.1071667   |            |             |            |            |
| 0.050418638 | 0.322762247         | 0.4540735   | 0.3316547          | 0                 | 0.2733758          | 0.4089949   |            |             |            |            |
| 0           | 0.2439117           | 0.11069     | 0                  | 0.2865283         | 0                  | 0.3353097   | 0.07311829 |             |            |            |
| 0.05905409  | 0                   | 0.04439582  | 0.148237435        | 0.08253766        | 0.09260554         | 0.415097    |            |             |            |            |
| 0.267957411 | 0.3350920.1409201   | 0           | 0                  | 0                 | 0.04618468         | 0.08393292  |            |             |            |            |
| 0.0506152   | 0                   | 0.3791671   | 0                  | 0.2233234         | 0.1439328          | 0.1722156   |            |             |            |            |
| 0.04921231  | 0.1788441           | 0.1255364   | 0.093342221        | 0.05548847        | 0.4194115          |             |            |             |            |            |
| 0.05255696  | 0                   | 0.07553047  | 0.2851849          | 0.1356880.1541011 | 0.05734684         |             |            |             |            |            |
| 0.06084909  | 0                   | 0.064234008 | 0                  | 0.3578137         | 0.1547705          | 0.052863372 |            |             |            |            |
| 0.4325676   | 0                   | 0.04322465  | 0.295294087        | 0.2610044         | 0                  | 0.1607017   | 0          |             |            |            |
| 0.3463962   | 0                   | 0.1074233   | 0                  | 0                 | 0                  | 0.1001210   | 0          | 0.2172082   |            |            |
| 0.4694029   | 0.1749936           | 0           | 0.03992986         | 0.0316212         | 0.1500277          | 0.343715263 |            |             |            |            |
| 0.2794380   | 0.1467385           | 0           | 0                  | 0                 | 0.1535687          | 0.08004152  | 0.04601578 |             |            |            |
| 0.116188562 | 5.3423750.047221284 | 0.0772929   | 0.3788227          | 0.1666858         | 0                  |             |            |             |            |            |
| 0.2112564   | 0.2044398           | 0           | 0                  | 0.09764455        | 0.1330005          | 0.06010137  |            |             |            |            |
| 0.1654118   | 0.05344835          | 0.2175992   | 0.1337923          | 0.06371444        | 0.1080499          | 0           |            |             |            |            |
| 0.05745389  | 0.146339332         | 0.2417216   | 0.2867479          | 0.1183284         | 0                  | 0.090593207 |            |             |            |            |
| 0.2319861   | 0.1225897           | 0.1796306   | 0                  | 0.1058149         | 0.07993599         | 0.1104726   |            |             |            |            |
| 0.1278903   | 0.03370154          | 0           | 0                  | 0.03545946        | 3.2971060          | 0.05235967  | 0          |             |            |            |
| 0.03609843  | 0.05311218          | 0.05715395  | 0.062794049        | 0.6384749         | 0                  | 0.133915561 |            |             |            |            |
| 0.05013137  | 0                   | 0.05359117  | 0.1010918          | 0.3600355         | 0.1072959          | 0.144354427 |            |             |            |            |
| 0.06062385  | 0                   | 0           | 0.07203123         | 0                 | 0.0956380.07821293 | 0           | 0          | 0.12961434  |            |            |

|             |             |             |             |             |             |             |             |
|-------------|-------------|-------------|-------------|-------------|-------------|-------------|-------------|
| 0.1407348   | 0           | 0           | 0           | 0.3498873   | 0.0450497   | 0.2794434   | 0.06398772  |
| 0.04473371  | 0.2112222   | 0.1363691   | 0.1360283   | 0.1026886   | 0           | 0.1265011   |             |
| 0           | 0           | 0.2443742   | 0           | 0.2275962   | 0.8982543   | 0           | 0.0543875   |
| 0.1231244   | 0           | 0.1519527   | 0.1096743   | 0.07036394  | 0.07536639  | 0           |             |
| 0.06086957  | 0.06612774  | 0.2211131   | 0.2943364   | 0.0930635   | 0.07056623  | 0           |             |
| 0           | 0           | 0.3769      | 0.2358042   | 0.1137759   | 0.05357852  | 0.165737917 | 0.255287203 |
| 0.3091404   | 0.097691174 | 0           | 0.1499786   | 0.06041256  | 0.0493763   | 0.1387849   |             |
| 0           | 0.061593176 | 0.3561022   | 0           | 0.08121417  | 0.199780461 | 0.08379594  |             |
| 0.08684556  | 0           | 0.09092379  | 0.2858904   | 0.1030379   | 0           | 0.3412103   | 0           |
| 0.07712668  | 0.1736464   | 0           | 0           | 0.147486719 | 0.1405513   | 0.1331662   |             |
| 0.03578532  | 0.3208721   | 0.06140795  | 0.1302871   | 0           | 0.09974194  | 0.1111976   |             |
| 0.180797346 | 0.04246778  | 0.4957110   | 0.2002550   | 0.3366984   | 0.04191055  | 0.1329394   |             |
| 0           | 0.1082492   | 0.06832297  | 0.2376647   | 0.05662937  | 0           | 0           | 0.05049516  |
| 0.085224579 | 0           | 0.1003329   | 0.1355378   | 0.06588519  | 0.2388322   | 0           | 0           |
| 0.2682561   | 0.3958293   | 0.1710670   | 0.14918103  | 0.185626673 | 0.1235560   |             |             |
| 0.2209879   | 0.3042275   | 0           | 0.09680689  | 0.02634772  | 0           | 1.3669660   |             |
| 0.2495532   | 0.03548662  | 0.1455949   | 0.1958783   | 0.2144964   | 0.1098692   |             |             |
| 0.07565952  | 0           | 0           | 0.1460572   | 0           | 0.2062546   | 0           | 0.06199809  |
| 1.2138320   | 0.1529677   | 0.08730494  | 0.1253223   | 0.3164026   | 0           | 0.1073348   |             |
| 0.2456350   | 0.04521224  | 0           | 0.033667923 | 0.0950164   | 0           | 0.2347876   | 0           |
| 0.2201964   | 0.2951201   | 0.046408114 | 0.04374148  | 0.3138372   | 0           | 0.03484774  |             |
| 0.038182872 | 0.2308828   | 0           | 0           | 0.06484711  | 0.051226095 | 0.05165783  |             |
| 0.2376650   | 0.05146304  | 0.05365608  | 0.2204458   | 0           | 0.05553404  | 0.04654183  | 0           |
| 0           | 0           | 0.08856752  | 0.211248355 | 0.05383312  | 9.6037830   | 0.06160708  | 0.1124019   |
| 0           | 0           | 0           | 0           | 0.2298312   | 0.0638110   | 0.2151503   | 0           |
| 0.1208598   | 0.1194112   | 0.06618946  | 0.4210759   | 0.08590644  | 0           | 0           | 0           |
| 0.1678560   | 0.4506762   | 0.1212605   | 0.08570082  | 0.1592319   | 0.2634187   |             |             |
| 0.1854441   | 0.0758598   | 0           | 0           | 0           | 0.1017491   | 0           | 0           |
| 0.09341551  | 0.07661016  | 0.1597710   | 0.05906578  | 0.1537590   | 0.09190587  | 0.45094331  |             |
| 0.03451113  | 0           | 0.6659128   | 0           | 0.1118938   | 0.350960711 | 0.0926303   | 0           |
| 0.122706884 | 0.06461607  | 0.1696087   | 0           | 0.06127391  | 0.06916438  | 0.05154433  |             |
| 0           | 0.0684607   | 0.09545197  | 0.0862031   | 0.4099978   | 0.041849921 | 0.06503552  |             |
| 0.3794767   | 0           | 0.1535680   | 0.07460071  | 0.1578211   | 0           | 0.1554785   | 0.1140332   |
| 0.07801639  |             |             |             |             |             |             |             |
| AC010422.2  | 0.1632211   | 0           | 0.2157996   | 0.049838047 | 0.07387131  | 0.07236639  |             |
| 0.03812315  | 0.1097518   | 0           | 0.08103224  | 0.2216089   | 0.119181361 | 0.1657849   |             |
| 0.23399012  | 0.128393297 | 0.3386781   | 0.4031215   | 0.1344415   | 0.07767687  |             |             |
| 1.0620450   | 0.34650061  | 0.08085575  | 0.6115552   | 0.3299692   | 0.5065760   | 0.0603513   |             |
| 0.5928205   | 0.6059607   | 0.2740668   | 0.226442144 | 0.3826431   | 0.540541385 |             |             |
| 2.0794290   | 0.1227935   | 0.4324666   | 0.583719148 | 0.2539011   | 0.0277180   | 0.3609461   |             |
| 0.4825941   | 0.4247566   | 0.03062008  | 0.8347030   | 0.2013449   | 0.09077263  |             |             |
| 0.2199617   | 0.3805327   | 0.6662776   | 0.4771315   | 0.4567103   | 0.522038    |             |             |
| 0.07904817  | 0.04161481  | 0.154712894 | 0.4414610   | 0.5252368   | 1.21957     | 0.1683296   |             |
| 0.4757230   | 0.8697466   | 0.5847404   | 0.1702797   | 0.07604101  | 0.6454794   |             |             |

2.8145670.766559545 0.3516290.3426622 0.2394272 0.070095999 0.2867889  
0.2472081 0.5731520.078311062 0.5191315 0.6423153 0.3196319  
0.1994584 0.4921241 1.3325350.2848831 1.1545090.0370583 0.3564383  
0 0.2212648 0.1595510.2635957 0.9360474 0.9780899 0.4930822  
0.152141154 0.5029904 0.1257876 0.3978687 0.62667141 1.713703  
0.0390849 0.5837191.2087970.1678136 0.7843328 1.4031990.3393829  
0.5572024 0.3050810.154064203 0.5389928 0.187844035 0.2049783  
0.6697506 0.2762784 0.3830190.1167178 0.6325291 0.03667511  
1.6349880.2913191 0.2057493 2.1915710.6031669 0.03543583 0.2524665  
0.4213405 0.8448434 0.2149087 0.7856187 0.2666403 0.291065474  
0.9157686 0.2172704 0.1307513 0.2892695 0.240250332 0.2153269  
0.1219140.5359214 0.2352124 0.3858494 1.37792 1.58692 0.4239512  
0.2904701 0.4045840.1760329 0.1645654 0.5864759 0.7148270.694281  
0.2945339 0.1914638 0.2464907 0.6441745 0.249791759 0.105826  
0.7341289 0.295949875 0.2991304 0.06723116 0.2131831 0.2010691  
0.7558856 0.2134091 0.319019496 0.6832833 1.1835370.2042853  
0.4059272 0.1380007 0.03170362 0.3629819 0.1964690 0.128899931  
0.4198772 0.4023290.2070923 0.09484559 0.4175506 0.2986760.3087813  
0.1272701 0.1186324 0.07001933 0.7232934 0.2404952 0.8510216  
0.2236448 0.08386924 2.8335670.2260419 2.5517860.032397726 0.7921961  
0.6848659 0.4378004 1.0345570.4327018 0.1360508 0.117561162  
0.3358115 1.70876 0.1399522 0.2498366 0.203884934 0.1412462  
1.8413710.4031397 0.7805709 0.5553033 0.3274940.1668902 0.5526716  
0.4013537 0.1999054 0.6644295 0.3520184 1.1367080.329648803  
0.072537174 1.1785060.323842396 0.313000129 1.8229680.160212205 0.2946249  
0.3680531 1.27889 0.449193697 1.7943060.3429262 1.0499650.309056702  
0.2222242 1.0939810.09473364 0.2813149 0.2369289 0.5806631  
0.06595959 0.7540658 0.05268195 0.2301047 0.2072272 0.510370121  
0.3979597 0.032594178 0.8153634 0.4414408 0.2372538 3.105941  
0.2849909 0.5758621.1914210.6282172 0.5529235 0.149834021 0.3660255  
2.7524650.4741696 0.6138780.5279410.5875853 0.5677758 0.2511892  
0.09059518 0.8272415 0.2628138 0.03437003 0.05806042 0.301301  
0.565032245 0.3171832 0.06651994 0.4792558 0.1747254 0.7521333  
0.1113919 0.5293702 0.1016295 0.1499610.5292749 0.560466474  
2.010127367 0.9283891 1.6929420.5494247 0.4370176 0.2988951  
0.2567288 0.06987331 0.2714431 0.1342648 0.4029532 0.08272591  
0.2823282 0.1447924 0.1298657 0.4799568 0.2549485 0.5517783  
0.4356930.060875211 2.42087 0.2401535 0.09116345 0.9146139 0.4521467  
2.26422 0.1893555 0 0.1736475 0.2492631 0.5593931 0.176499031  
0.1423242 0.4885622 0.1147671 0.2697783 0.1685786 0.066964704  
0.04199675 0.1686492 0.3632122 0.3358464 0.02433142 0.3913246  
0.153841072 0.2320021 0.6242147 0.5890580.04620756 0.177204602  
0.6633183 0.6376573 0.3391433 0.257958739 0.237737484 0.06849747  
0.2926301 0.3753155 1.1383540.2923077 0.1251479 1.5095640.3394256



|             |             |             |            |             |             |             |             |            |             |
|-------------|-------------|-------------|------------|-------------|-------------|-------------|-------------|------------|-------------|
| 0.2858241   | 0.2739629   | 0.2587920   | 0.4110370  | 0.812324777 | 0.1784547   | 1.071712    |             |            |             |
| 0.4901401   | 0.4222889   | 0.5672978   | 0.2808065  | 0.6876464   | 0.05125152  |             |             |            |             |
| 0.7618813   | 0.2961433   | 0.4279290   | 0.9425097  | 0.3038460   | 0.6255307   | 0.8821035   |             |            |             |
| 0.1602581   | 0.4486227   | 0.2194155   | 0.8026138  | 0.2468063   | 0.1638619   |             |             |            |             |
| 0.2849780   | 0.08218747  | 1.7165420   | 0.2596701  | 0.1128919   | 0.8110143   | 0.3617765   |             |            |             |
| 0.3409138   | 0.1847466   | 0.4657187   | 0.3688439  | 0.1257361   | 0           | 0.2246094   |             |            |             |
| 0.1903558   | 0.4119988   | 0.8432358   | 1.2375060  | 0.04425651  | 0.5184753   |             |             |            |             |
| 0.3096687   | 0.4571274   | 2.1538475   | 0.28662    | 1.4611540   | 0.8530601   | 0.548115084 |             |            |             |
| 0.1144030   | 0.7754774   | 0.7471453   | 0.2498886  | 0.2225541   | 0.116342094 |             |             |            |             |
| 0.122826319 | 0.2130793   | 0.122030547 | 0.8567989  | 1.6867390   | 0.5687377   |             |             |            |             |
| 0.1604940   | 0.1366939   | 0.6322592   | 0.4538890  | 0.4904503   | 0.1428799   | 0.2718253   |             |            |             |
| 0.110984673 | 1.5953670   | 0.2515901   | 0.3800690  | 0.1527215   | 0.1483790   | 0.5231706   |             |            |             |
| 0.1437010   | 0.2405224   | 0.1890078   | 1.137933   |             |             |             |             |            |             |
| AC002398.2  | 0.4262474   | 3.3203920   | 0.4152507  | 3.116765757 | 0.260601568 | 0.9051281   |             |            |             |
| 1.9439922   | 0.9214482   | 0.8547063   | 1.185130   | 0.7675726   | 0.917335323 | 0.6152343   |             |            |             |
| 1.768853886 | 3.541190887 | 0.5792877   | 0.6346665  | 0.6467452   | 0.3238498   | 0           |             |            |             |
| 0.047625084 | 0           | 0           | 0          | 0.03046172  | 0.1161305   | 0.04753043  | 0           | 0          | 0           |
| 1.6141920   | 0.094557515 | 0.05264902  | 0.02953555 | 0           | 0.097671056 | 0.1526772   |             |            |             |
| 0.08988992  | 0.1157580   | 0.5416997   | 0.1857579  | 0           | 0.1070781   | 0.4197227   | 0           |            |             |
| 0           | 0.4224445   | 0           | 0          | 0.05492633  | 0.03139149  | 0.01901348  | 0.08007699  |            |             |
| 0.029770511 | 0           | 0           | 0          | 0           | 0.04817929  | 0.7276536   | 0           | 0.06553187 | 0           |
| 0           | 0.122920533 | 0.8645693   | 0          | 0           | 0.370924664 | 0           | 0           | 0          | 0.037672367 |
| 0.1873003   | 0.3476167   | 0           | 0          | 0.1262621   | 0           | 0.4111381   | 0.1110777   |            |             |
| 0.4635094   | 0.01905205  | 0.043571327 | 0.04257672 | 0           | 0.0281790   | 0.1385525   | 0           |            |             |
| 0           | 0.073189116 | 0.1018816   | 0          | 0           | 0           | 0.0445619   | 0.7896926   | 0.0936014  |             |
| 0.03322883  | 0           | 0.1117960   | 0.06530549 | 0           | 0.02935249  | 0.02470474  | 0           |            |             |
| 0.210850186 | 0.1479105   | 0           | 0.1329067  | 0           | 0           | 0           | 0           | 0          | 0.2262352   |
| 0.03833739  | 0.1582690   | 0           | 0.06400747 | 0           | 0.2756910   | 1.7957820   | 0.186693511 |            |             |
| 0           | 0.1567803   | 0           | 0.7730898  | 0.173362456 | 0.0295958   | 0.3909868   |             |            |             |
| 0.05729126  | 0           | 0.06749707  | 0.05098947 | 0           | 0.04078924  | 0.0214975   | 0           | 0          |             |
| 0           | 0.05129644  | 0           | 0.1001974  | 0.09445909  | 0           | 0.2032748   | 0.1458292   |            |             |
| 0.040054992 | 0           | 0.1412642   | 0          | 0.03197774  | 0.1293691   | 0           | 0.6126008   |            |             |
| 0.0382765   | 0           | 0           | 0          | 0           | 0           | 0           | 0.1220109   | 0.06236296 | 0.03150449  |
| 0.4331166   | 0.041339119 | 0           | 0          | 0           | 0           | 0           | 0.08620875  | 0.02970851 | 0           |
| 0.3138816   | 0           | 0.4639306   | 2.7621640  | 0.09825431  | 0           | 0.4303593   | 0           | 0          |             |
| 0.1169108   | 0           | 0.3266523   | 0.2864887  | 0.03829246  | 0           | 0.1387705   |             |            |             |
| 0.02617947  | 0           | 0           | 0          | 0           | 6.604121322 | 0.1747233   | 0.2109074   |            |             |
| 0.1763042   | 0           | 0           | 0          | 0           | 0.03430562  | 0           | 0.1923332   | 0          | 0.02419174  |
| 0           | 0           | 0           | 0          | 0.100381355 | 0.9566815   | 0           | 0           | 1.3721830  | 0           |
| 0           | 0           | 0           | 0          | 0           | 0.3645810   | 0           | 0           | 0.06346112 | 0           |
| 0.2215307   | 0.196415168 | 0.05469793  | 0.03135955 | 0.5379280   | 0.3610116   | 0           | 0           |            |             |
| 0           | 0           | 0.2046951   | 0.3997120  | 0.922614336 | 0.0270893   | 0           | 0           | 0          | 0.0534677   |
| 0           | 0.1092538   | 0           | 0.2832815  | 0           | 0           | 0.1322725   | 0.2234446   | 0.03220979 |             |
| 0.027181475 | 0.02179777  | 0.06400024  | 0          | 0.02101338  | 0           | 0.03572417  | 0           | 0          |             |

|             |             |             |             |             |             |             |             |            |
|-------------|-------------|-------------|-------------|-------------|-------------|-------------|-------------|------------|
| 0.03607016  | 0.10912     | 0           | 0.039469106 | 0.2627126   | 0           | 2.5725840   | 0.09703012  |            |
| 0.03594666  | 0.3396309   |             | 0.01680665  | 0.03264514  | 0           | 0.4523048   | 0.07959236  |            |
| 0           | 0.04643595  | 0.7496795   | 0.05130852  | 0.1401665   | 0.07239241  | 0.02994211  |             |            |
| 0.29284666  | 0.0310556   | 0           | 0.4385514   | 0           | 0           | 0.1300570   | 0.04554574  | 0          |
| 0           | 0           | 0.024259066 | 4.1422270   | 0.03680663  | 0.08651979  | 0           | 0.064428163 |            |
| 0.04040596  | 0           | 0           | 0.04039062  | 0.02340977  | 0           | 0.029602752 | 0.05580353  |            |
| 0.03336501  | 0.0298287   | 0.02222863  | 0           | 0           | 0           | 0.6933811   | 0           | 0          |
| 0.01647572  | 0           | 0.06565436  | 0.06845215  | 0           | 0.1204074   | 0.03542399  |             |            |
| 0.02968805  | 0.05499948  | 0           | 0           | 0           | 0.053900338 | 0           | 0           | 0.0785957  |
| 0.2867951   | 0.1212909   | 0.09005662  | 0.03150472  | 0           | 0           | 0           | 0.1097919   | 0          |
| 0           | 0.06018364  | 0           | 0           | 0.1269498   | 0           | 0           | 0.01826596  | 0.1182412  |
| 0.02741834  | 0           | 0           | 0.03569059  | 0.02715392  | 0           | 0.03867476  | 0           | 0          |
| 0.02800486  | 0           | 0           | 0           | 3.9834120   | 0           | 0.0276891   | 0.04258013  | 0          |
| 0.04886799  | 0           | 0.03767681  | 0           | 0           | 0           | 0           | 0.2617071   | 0          |
| 0.502238677 | 0           | 0.039136059 | 0.08243444  | 0           | 0           | 0           | 0.02205925  | 0.03287904 |
| 0.1106018   | 0.9170621   | 0           | 0.08248069  | 0           | 0.026695177 | 0.04148478  | 0           | 0          |
| 0.1469366   | 0.04758621  | 0.02516768  | 0           | 0           | 0.6546545   | 0.0746475   |             |            |
| HAND2-AS1   | 0.1431088   | 5.4872560   | 0.1864699   | 4.79424369  | 0.17339854  | 0.8742646   |             |            |
| 4.7485414   | 2.684726    | 1.6598      | 4.8515980   | 0.8876531   | 1.095921256 | 1.4229651   | 1.19423282  |            |
| 5.272737856 | 0.4935203   | 0.05445472  | 0.2171390   | 0.1304756   | 0.01313869  |             |             |            |
| 0.057562926 | 0.007835498 | 0.01422337  | 0.001639814 | 0.008181803 | 0.4971199   |             |             |            |
| 0.06861907  | 0.01879101  | 0.01264715  | 0.014629236 | 1.1884880   | 0.082541813 |             |             |            |
| 0.003535289 | 0.02181586  | 0.2260551   | 0.047548683 | 0.4961970   | 0.04526962  |             |             |            |
| 0.1204806   | 0.5508090   | 0.08232386  | 0.007912808 | 0.05752082  | 0.6829113   |             |             |            |
| 0.005864342 | 0.008120325 | 0.04160406  | 0.004782743 | 0.001541248 | 0.09589336  |             |             |            |
| 0.01686306  | 0.04596198  | 0.0376392   | 0.011994224 | 0           | 0.02195651  | 0.02251142  |             |            |
| 0.004660668 | 0.0355867   | 0.9405676   | 0.02615331  | 0.2288182   | 0.01228152  |             |             |            |
| 0.05994523  | 0.009570228 | 0.112803257 | 0.0555302   | 0.001702892 | 0.008838932 |             |             |            |
| 0.434739254 | 0.004631981 | 0.005323605 | 0.01295992  | 0.010118532 | 0.002794863 |             |             |            |
| 0.1167092   | 0.1124263   | 0.002577192 | 0.1589678   | 0           | 0.2553666   | 0           |             |            |
| 0.2944794   | 0.01407242  | 0.03803459  | 0.06146746  | 0.1001324   | 0.02081387  |             |             |            |
| 0.01860711  | 1.4964360   | 0.0187385   | 0.103204919 | 0.001710293 | 0.002708826 |             |             |            |
| 0.01071008  | 0.033124863 | 0.0508683   | 0.0580766   | 0.1602718   | 0.02900635  |             |             |            |
| 0.01858552  | 0.06005525  | 0.03021777  | 0.01096287  | 0.006856746 | 0.02759355  |             |             |            |
| 0.091238381 | 0.04477049  | 0.285186959 | 0.1158725   | 0.002704317 | 1.045945    |             |             |            |
| 0.003093106 | 0.007540523 | 0.005837768 | 0.04738772  | 0.01473879  | 0.002091177 |             |             |            |
| 0.1272271   | 0.01802002  | 0.02833996  | 0.004578646 | 0.08854288  | 0.01289397  |             |             |            |
| 0.006822611 | 0.3077647   | 0.002114779 | 2.1901920   | 0.372950157 | 0.004437224 |             |             |            |
| 0.3228440   | 0.01858374  | 0.4921221   | 0.205657364 | 0.01987306  | 0.3150489   |             |             |            |
| 0.2885255   | 0.02279375  | 0           | 0.09244404  | 0.007886353 | 0.          |             |             |            |

|             |             |             |             |             |             |
|-------------|-------------|-------------|-------------|-------------|-------------|
| 0.2478327   | 0.1842528   | 0.01692377  | 1.0486990   | 0.061068675 | 0.07233616  |
| 0.01299618  | 0.006689574 | 0.008169967 | 0.01948248  | 0.1736630   | 0.01595899  |
| 0.0109630   | 0.8392316   | 0.02714148  | 0.4069246   | 2.2791020   | 0.01979281  |
| 0.002408086 | 1.3365260   | 0.02615169  | 0.00730169  | 0.02616786  | 0.043953981 |
| 0.7896285   | 0.09041488  | 0.1722752   | 0.01909636  | 0.1281252   | 0.0650425   |
| 0.017088769 | 0.004339002 | 0.01174404  | 0.004520788 | 0.01936876  | 2.700246336 |
| 0.2268257   | 0.7392596   | 0.1160175   | 0.01103125  | 0.00996534  | 0.004533785 |
| 0.0215638   | 0.01266959  | 0.007778805 | 0.6554279   | 0.01010007  | 0.006497731 |
| 0.006884695 | 0.007098959 | 0.003124164 | 0.02979278  | 0.046027859 | 0.125821374 |
| 0.4582416   | 0.005175234 | 0.01268944  | 1.5901520   | 0.01458042  | 0.007914557 |
| 0.01220218  | 0.003408409 | 0.0104358   | 0.037080695 | 0.05742694  | 0.01487923  |
| 0.4243368   | 0.05062833  | 0.003061346 | 0.04634031  | 0.04261302  | 0.008119371 |
| 0.4016134   | 0.1085904   | 0.063746504 | 0           | 0.145295951 | 0.006020153 |
| 0.9111875   | 0.09345739  | 0.01841177  | 0.01860171  | 0.4700757   | 0.6664617   |
| 0           | 0.830542982 | 0.02364698  | 0.01061626  | 0.05514049  | 0           |
| 0.1148884   | 0.01622802  | 0.1419323   | 0.005089879 | 0.002425574 | 0.1931806   |
| 0.1012764   | 0.07353624  | 0.00912594  | 0.002927363 | 0.1418176   | 0           |
| 0.01975416  | 0           | 0.01709991  | 0.008207187 | 0.03875276  | 0.03175126  |
| 0.021299289 | 0.002650281 | 0.1887554   | 0.007812291 | 1.6801180   | 0.2084928   |
| 0.06758514  | 0.6903881   | 0.02708488  | 0.02630476  | 0.2970894   | 0.03904903  |
| 0.3821308   | 0.001519978 | 0.07639326  | 0.3230128   | 0.006890553 | 0.06823652  |
| 0.03402716  | 0.03417952  | 0.176977227 | 0.02293862  | 0.008865746 | 1.1028260   |
| 0.02215815  | 0.01062212  | 0.02619928  | 0.01529158  | 0.01637994  | 0.02430664  |
| 0           | 0.00150581  | 1.3861190   | 0.0815595   | 0.06584272  | 0.01960376  |
| 0.191796524 | 0.5765527   | 0.02490409  | 0.01676088  | 0.0461067   | 0.08331202  |
| 0.003160178 | 0.161009575 | 0.6463762   | 0.1299433   | 0.01402061  | 0.06716761  |
| 0.009812792 | 0.003296424 | 0.02535119  | 0.4436829   | 0.00277756  | 0.004388277 |
| 0.02433894  | 0           | 0.04188146  | 0.03906975  | 0.009442231 | 0.08489403  |
| 0.04519451  | 0.0239220   | 0.1680369   | 0.02781319  | 0.01114613  | 0.001896781 |
| 0.050670376 | 0.004611607 | 0.5701929   | 0.1688820   | 0.1620864   | 0.17307     |
| 0.1874614   | 0.002115487 | 0.01489991  | 0           | 0.03006498  | 0.01474466  |
| 0.005892638 | 0.2400887   | 0.04041225  | 0.04070576  | 0.00129418  | 0.1125228   |
| 0.002835056 | 0.01127232  | 0.008585691 | 0.1587938   | 0.01656984  | 0.0053097   |
| 0.00443587  | 0.05032776  | 0.06564017  | 0.008272953 | 0.02337248  | 0.05873239  |
| 0.01705073  | 0.0244462   | 0           | 0.0601113   | 0           | 0.03224629  |
| 2.7854720   | 0.04140434  | 0.004358162 | 0.01301492  | 0.06290197  | 0.002093498 |
| 0.008002427 | 0.1575072   | 0.1323053   | 0.01011972  | 0.0241482   | 0.1633669   |
| 0.03863     | 0.1093865   | 0.08767416  | 0.002194051 | 0.03228798  | 0.5942927   |
| 0.116501888 | 0.525704516 | 0.1399537   | 0.018395421 | 0.005535327 | 0.00484317  |
| 0           | 0.01574707  | 0.1570114   | 0.07727193  | 0.2859286   | 0.2785721   |
| 0.00408844  | 0.2344603   | 0           | 0.043020817 | 0.02228504  | 0.009287949 |
| 0           | 0.1249761   | 0.01118365  | 0.04055916  | 0.01083106  | 0.05105635  |
| 0.2222366   | 0.1152863   |             |             |             |             |
| AC109460.3  | 0.07518811  | 0.1259380   | 0.07087455  | 0.059520707 | 0.052933928 |
| 0.09074721  | 0.1365894   | 0.1703970   | 0.06890239  | 0.05080708  | 0.1270385   |
| 0.047445404 |             |             |             |             |             |

|                   |                           |                   |                     |                    |             |   |
|-------------------|---------------------------|-------------------|---------------------|--------------------|-------------|---|
| 0.1216249         | 0.167670182               | 0.117559031       | 0.1752735           | 0.1838229          | 0.1712652   |   |
| 0.01855363        | 0.1646197                 | 0.106410757       | 0.09173638          | 0.6047461          | 0.1060975   |   |
| 0.2646852         | 0.2162295                 | 0.0884994         | 0.8134255           | 0.1262494          | 0.115901095 |   |
| 0.1792783         | 0.243551847               | 0.1470450.2383064 | 0.2018996           | 0.100022363        |             |   |
| 0.2008895         | 0.4797961                 | 0.3592263         | 0.2593592           | 0.1429605          | 0.07679494  |   |
| 0.2658323         | 0.2965706                 | 0.09756735        | 0.09382015          | 0.1887772          | 0.0663103   |   |
| 0.08832361        | 0.1909044                 | 0.1285888         | 0.08260512          | 0.1093397          | 0.118253376 |   |
| 0.2767953         | 0.4058878                 | 0.19975           | 0.06318185          | 0.1674541          | 0.2619389   |   |
| 0.4566104         | 0.06507584                | 0.09535517        | 0.2264474           | 0.2299897          | 0.259388449 |   |
| 0.07465678        | 0.2455412                 | 0.22467           | 0.129757358         | 0.08990809         | 0.1082533   |   |
| 0.2395769         | 0.126259465               | 0.3022450.1678044 | 0.0721047           | 0.1429258          |             |   |
| 0.2860311         | 0.0742664                 | 0.2041385         | 0.1792452           | 0.1106452          | 0.2506829   | 0 |
| 0.06342065        | 0.08166385                | 0.1713953         | 0.1289890.1486693   | 0.1454879          |             |   |
| 0.136274638       | 0.08852608                | 0.1427147         | 0.2534227           | 0.23133065         | 0.1604128   |   |
| 0.1073603         | 0.2904689                 | 0.3464748         | 0.1660596           | 0.1942816          | 0.2589897   |   |
| 0.2512978         | 0.1457668                 | 0.1202365         | 0.110397708         | 0.3034631          | 0.145820247 |   |
| 0.09180076        | 0.2599582                 | 0.1253827         | 0.2229985           | 0.08084854         | 0.1079169   |   |
| 0.008760089       | 0.04541017                | 0.1082409         | 0.1298820.1760766   | 0.1309730.07194467 |             |   |
| 0.1206065         | 0.1880377                 | 0.2724251         | 0.03422156          | 0.1368282          | 0.1410252   |   |
| 0.324440106       | 0.2105346                 | 0.06162703        | 0.1093078           | 0.1113179          | 0.057385353 |   |
| 0.1653179         | 0.1019198                 | 0.1991240.2633532 | 0.07121658          | 0.2848199          |             |   |
| 0.1720287         | 0.31898                   | 0.09606556        | 0.1248235           | 0.02943262         | 0.07580735  |   |
| 0.5030274         | 0.1260232                 | 0.1368127         | 0.1582905           | 0.1028978          | 0.09251928  |   |
| 0.2670015         | 0.079552513               | 0.06319304        | 0.2980975           | 0.381723574        | 0.3334297   |   |
| 0.1766446         | 0.1867073                 | 0.1640911         | 0.1757969           | 0.1954009          | 0.186689705 |   |
| 0.1728070.1319245 | 0.1903                    | 0.0884032         | 0.1030074           | 0.1741702          | 0.1548225   |   |
| 0.07430249        | 0.1043631                 | 0.123154344       | 0.3231580.1489533   | 0.1669456          |             |   |
| 0.03020598        | 0.1994693                 | 0.1569495         | 0.1327580.1266637   | 0.1239705          |             |   |
| 0.07944171        | 0.1907595                 | 0.2728582         | 0.06098161          | 0.1513539          | 0.1001636   |   |
| 0.1880044         | 0.08548667                | 0.6723968         | 0.1044685           | 0.3063581          | 0.359175    |   |
| 0.1711170.3918468 | 0.2024009                 | 0.1722321         | 0.126361113         | 0.3248535          |             |   |
| 0.3473604         | 0.03899991                | 0.03580506        | 0.251612746         | 0.1229011          | 0.3246316   |   |
| 0.2188467         | 0.3000590.1252690.1815916 | 0.1554650.12988   | 0.5224693           |                    |             |   |
| 0.1611519         | 0.1633711                 | 0.1291258         | 0.3309030.144354391 | 0.066416239        |             |   |
| 0.5568684         | 0.085087047               | 0.120450074       | 0.1741711           | 0.062185055        | 0.1876615   |   |
| 0.2362632         | 0.4582070.317001553       | 0.6541511         | 0.2488809           | 0.2379299          |             |   |
| 0.13709466        | 0.1127943                 | 0.2750572         | 0.2300488           | 0.3695664          | 0.1584576   |   |
| 0.2896281         | 0.1575488                 | 0.1320833         | 0.1069591           | 0.1679395          | 0.1512425   |   |
| 0.276318498       | 0.2036899                 | 0.093423974       | 0.2643101           | 0.1845218          | 0.06800354  |   |
| 0.2439039         | 0.1410062                 | 0.4367161         | 0.3303146           | 0.1776952          | 0.1012532   |   |
| 0.203996329       | 0.2521949                 | 0.1864394         | 0.08607645          | 0.1566262          | 0.09955431  |   |
| 0.1543834         | 0.1175347                 | 0.2871342         | 0.04057359          | 0.2775697          | 0.08519435  |   |
| 0.09030455        | 0.09014271                | 0.08796053        | 0.354274261         | 0.1488168          | 0.1509428   |   |
| 0.1895965         | 0.0443427                 | 0.4538575         | 0.0665167           | 0.2607897          | 0.06068718  |   |

|             |             |             |             |             |             |
|-------------|-------------|-------------|-------------|-------------|-------------|
| 0.2283471   | 0.2663866   | 0.192931821 | 0.215569462 | 0.2021854   | 0.3177194   |
| 0.2449695   | 0.3211830   | 0.1204757   | 0.06132135  | 0.1063968   | 0.0607837   |
| 0.1483239   | 0.04812399  | 0.2420554   | 0.1292522   | 0.1325743   | 0.2791735   |
| 0.08916507  | 0.1130928   | 0.2186613   | 0.1523855   | 0.152674618 | 0.4163331   |
| 0.1311137   | 0.07349056  | 0.04096153  | 0.04909008  | 0.5448596   | 0.06218959  |
| 0.01816797  | 0.2626866   | 0.2034219   | 0.2644457   | 0.087327162 | 0.1274815   |
| 0.1231794   | 0.1187891   | 0.2362737   | 0.2778361   | 0.106633032 | 0.05015598  |
| 0.05754709  | 0.5948954   | 0.1303560   | 0.0697406   | 0.1226799   | 0.24987239  |
| 0.1489284   | 0.4307268   | 0.1592135   | 0.1434807   | 0.123956093 | 0.1401566   |
| 0.1288765   | 0.1468244   | 0.236191298 | 0.15007502  | 0.07566993  | 0.06720827  |
| 0.08964654  | 0.1402001   | 0.1701852   | 0.05231167  | 0.3253917   | 0.07738882  |
| 0.10582     | 0.0794602   | 0.1545354   | 0.06662136  | 0.123777154 | 0.0682001   |
| 1.039       | 0.2536585   | 0.1572330   | 0.1355028   | 0.2533848   | 0.2150877   |
| 0.09487364  | 0.3275645   | 0.1970496   | 0.3134551   | 0.05446562  | 0.1646907   |
| 0.1195297   | 0.2257459   | 0.05981047  | 0.3151660   | 0.06289057  | 0.4501006   |
| 0.07935749  | 0.2397292   | 0.1191205   | 0.1079706   | 0.1025018   | 0.3544222   |
| 0.04718869  | 1.4732620   | 0.1344197   | 0.1492874   | 0.1512958   | 0.2398611   |
| 0.1517291   | 0.1111217   | 0.03827914  | 0.04768837  | 0.2159717   | 0.2569557   |
| 0.4632484   | 0.4846243   | 0.04228382  | 0.1393214   | 0.1886143   | 0.1031219   |
| 0.5439785   | 0.4817132   | 0.4869854   | 0.1309879   | 0.434419182 | 0.0901755   |
| 0.1543565   | 0.1906283   | 0.04775002  | 0.05315849  | 0.187576189 | 0.117351457 |
| 0.08906693  | 0.097159297 | 0.05116299  | 0.2909751   | 0           | 0.3735784   |
| 0.08762296  | 0.2196643   | 0.09757291  | 0.1435998   | 0.1604007   | 0.07935552  |
| 0.102723965 | 0.04119609  | 0.2918848   | 0.2723458   | 0.1276749   | 0.08269637  |
| 0.2218088   | 0.1172734   | 0.2831481   | 0.1173790   | 0.8802705   |             |
|             | AC008750.5  | 0.09391007  | 0           | 0.03621372  | 0           |
|             | 0           | 0.2380070   | 0.053333449 | 0.2225654   | 0.134627357 |
|             | 0.1804870   | 0.2123517   | 0.132907211 | 0.4884679   | 0.3940846   |
|             | 0.2550283   | 0.2835745   | 0.1658038   | 0.9111189   | 0.05256189  |
|             | 0.1185453   | 0.230896258 | 0.03673188  | 0.0824248   | 0           |
|             | 0.0627139   | 0.5653296   | 0.32394     | 0           | 0.08221458  |
|             | 0.1218618   | 0.5062242   | 0.07859433  | 0           | 0.1921639   |
|             | 0.2387739   | 0.1117353   | 0.124620746 | 0.09877652  | 0.08295619  |
|             | 0.1291324   | 0.3025211   | 0.2538326   | 0.4226982   | 0           |
|             | 0.09943528  | 0.114344682 | 0.1049022   | 0.5661811   | 0.4132668   |
|             | 0.2887595   | 0.3318755   | 0.07694536  | 0.105132187 | 0.8130865   |
|             | 0.1907129   | 0.4284350   | 0.2202247   | 0.1788921   | 0.09561351  |
|             | 0.1990023   | 0.1329212   | 0           | 0.1188188   | 0.06119897  |
|             | 0.02984274  | 0.1168165   | 0.034041449 | 0.2487807   | 0.08443462  |
|             | 0.1865382   | 0           | 0.2612132   | 0.04636581  | 0.1287365   |
|             | 0.1822479   | 0.2137261   | 0.2866987   | 0           | 5.1685360   |
|             | 0.2596316   | 0.06427513  | 0.4700791   | 0           | 0.1477084   |
|             | 0.03945962  | 0.2674702   | 0.1472270   | 0.1427173   | 0.2420964   |
|             | 0.5387440   | 0.04808563  | 0.08789075  | 0.2045504   | 0.19537693  |
|             |             |             |             |             | 0.1536768   |

|             |             |             |             |             |             |
|-------------|-------------|-------------|-------------|-------------|-------------|
| 0.1823027   | 0.1053198   | 0.08629839  | 0.0806337   | 0.1238894   | 0.3818941   |
| 0.0799413   | 0.03947142  | 0           | 0.0711481   | 0.1311035   | 0.1707457   |
| 0           | 0.1417939   | 0.1262447   | 5.7976910   | 0.3198838   | 0.09320686  |
| 0.06590169  | 0.1285196   | 0.1418196   | 0.1017413   | 0.055890686 | 0.1420708   |
| 0.1478346   | 0.039731114 | 0.08924021  | 0.09025748  | 0           | 0.3149233   |
| 0.2670454   | 0.0955002   | 0.171312795 | 0.05395907  | 0.05296306  | 0.1097008   |
| 0.2885056   | 0.3242142   | 0.3404956   | 0.2262470   | 0           | 0.057682492 |
| 0.1878943   | 0.1080249   | 0.1390102   | 0           | 0.1868532   | 0.08019419  |
| 0.9948895   | 0.1139063   | 0.1194475   | 0.1410009   | 0.04045906  | 0.1008948   |
| 0.04569968  | 0           | 0.07506267  | 0.1207635   | 0.05057668  | 0.1631314   |
| 0.130481328 | 0.1012875   | 0           | 0           | 0.1587299   | 0.1936333   |
| 0.7671195   | 0.03945631  | 0.04508251  | 0.09761709  | 0.1252567   | 0           |
| 0.273714446 | 0.1354444   | 0.4120052   | 0.2460059   | 0.1964835   | 0.3313297   |
| 0.59668     | 0           | 0.1196708   | 0.9159858   | 0.06709298  | 0.5247018   |
| 0.3375592   | 0.09537656  | 0.073758629 | 0.064920515 | 0.5503091   | 0.043475671 |
| 0.046689002 | 0.2669809   | 0.107542019 | 0.2636882   | 0.3088184   | 0.2693182   |
| 0.109643666 | 0.9508606   | 0.2124815   | 0.2168573   | 0.118544854 | 0.0745837   |
| 0.07729806  | 0.08478628  | 0.02697598  | 0.06361515  | 0.5961166   | 0.4427520   |
| 0.3374431   | 0           | 0.03432382  | 0.1236450   | 0.593813298 | 0.1526454   |
| 0.30630258  | 0.09382466  | 0.7704216   | 0.3185120   | 0.3427159   | 0.05465697  |
| 0.03865458  | 0.2284967   | 0           | 0.2969187   | 0.160921105 | 0           |
| 0.2206071   | 0.2546281   | 0.07492072  | 0.0746061   | 0.1183245   | 0.05081574  |
| 0.04817432  | 0.1824353   | 0.5288416   | 0           | 0.09228316  | 0           |
| 0.04494389  | 0.341348761 | 0.06083097  | 0.1786053   | 0.2412744   | 0.234568    |
| 0.3188637   | 0.04984768  | 0           | 0.1364371   | 0.4529740   | 0.3552744   |
| 0.088520386 | 0.275365854 | 0.1832879   | 0           | 0           | 0.3610423   |
| 0.1504744   | 0.1292464   | 0.09380455  | 0           | 0.0901249   | 0.1803208   |
| 0.3331773   | 0.09475602  | 0.1619859   | 0.1743441   | 0.2386443   | 0           |
| 0.3367089   | 0.04177969  | 0.040862325 | 0.6066675   | 0.1842313   | 0.03059661  |
| 0           | 0           | 0.0453687   | 0.06355219  | 0           | 0.1942673   |
| 0.2230896   | 0.3754912   | 0.101549578 | 0.1433021   | 0.3643845   | 0.1540743   |
| 0.1609671   | 0.09052637  | 0.119866349 | 0.08457062  | 0.03234438  | 0.3134638   |
| 0           | 0.0653296   | 0.1313378   | 0.247836991 | 0.03893269  | 0.1862233   |
| 0.3329715   | 0.1861002   | 0.13594071  | 0.1370002   | 0.06585012  | 0.1138245   |
| 0.115436081 | 0.319161315 | 0.02298937  | 0.09065869  | 0.04580537  | 0.04775731  |
| 0.1962108   | 0           | 0.3460018   | 0           | 0.07674346  | 0.05254196  |
| 0.3763792   | 0.3941535   | 0.188024435 | 0           | 2.2851030   | 0.4386737   |
| 0.2000896   | 0.08462158  | 0.1675472   | 0.04396008  | 0.0688049   | 0.2045643   |
| 0           | 0.1531980   | 0.04081659  | 0.1568891   | 0.1679543   | 0.6766967   |
| 0.05378643  | 0.2125672   | 0           | 1.2648970   | 0.07646218  | 0           |
| 0.1147744   | 0.1103362   | 0.09217794  | 0.09960164  | 0.2273352   | 0.4011304   |
| 0           | 0.3051166   | 0.2834530   | 0.4298421   | 0.3851329   | 0.10128     |
| 0.0782357   | 0.0335041   | 0.2555517   | 0.3072812   | 0.1358448   | 0.0772719   |
| 0           | 0.6090441   | 0.1662915   | 0.1363758   | 0.2370105   | 0.2628614   |
| 0.5930395   | 0.1227031   | 0.267578765 | 0.1228684   | 0.1735124   | 0.1367780   |
| 0.1341897   | 0.09959256  | 0.078094323 | 0.082446842 | 0.04767632  | 0.054608455 |
| 0.1150248   | 0.1509625   | 0           | 0.2181507   | 0.1539017   | 0.04587773  |
| 0.1157461   | 0.1218687   | 0.06371873  | 0.1918156   | 0.5676596   | 0.074498169 |
| 0           | 0.4342607   | 0.2551203   | 0           | 0.6307939   | 0.1404708   |

|             |             |             |             |             |             |             |
|-------------|-------------|-------------|-------------|-------------|-------------|-------------|
| 0.03215297  | 0.6458001   | 0           | 0.6943953   |             |             |             |
| AC012557.1  | 0.5573637   | 1.4446330   | 0.7008629   | 0.569752471 | 0.255909886 | 0.3760447   |
| 0.9905155   | 0.6843769   | 0.5567690   | 0.6947752   | 0.5527528   | 0.743176734 |             |
| 0.7876431   | 0.521102618 | 0.800619414 | 0.7821806   | 0.3427822   | 0.1862965   |             |
| 0.40364     | 0.9628561   | 0.257222221 | 0.3361270   | 0.6864232   | 0.3956889   | 0.5922835   |
| 0.6272189   | 0.5647642   | 0.4282386   | 0.2034515   | 0.437053987 | 0.5200342   |             |
| 0.663914468 | 0.5687129   | 0.3509462   | 0.1634378   | 0.685775503 | 0.4287955   |             |
| 0.2427469   | 1.0628510   | 0.2507752   | 0           | 0.4455196   | 0.6939920   | 0.3836317   |
| 0.8962126   | 0.4898609   | 0.1521077   | 0.6924488   | 0.1983493   | 0.4153186   |             |
| 0.4408167   | 0.1437681   | 0.4324944   | 0.225105995 | 0.2294008   | 0.7064175   | 0           |
| 0.07497498  | 0.2341939   | 0.5109057   | 0.6077089   | 0.3893301   | 0.4346534   |             |
| 0.2515627   | 0.1539538   | 0.088518878 | 0.04060455  | 0.8766077   | 0.6754007   |             |
| 0.364246806 | 0.2980540   | 0.1712789   | 0.2680494   | 0.24416133  | 0.5844832   |             |
| 0.8344317   | 0.2583676   | 0.7462552   | 0.3750668   | 0.4154629   | 0.5551374   |             |
| 0.4799430   | 0.07702788  | 0.5144988   | 0.235327954 | 0.1379737   | 0.1421299   |             |
| 0.3043885   | 0.1496639   | 0.6237671   | 0.23591     | 0.447998844 | 0.2751304   | 0.239669    |
| 0.6202453   | 0.710494889 | 0.2406780   | 0.4062015   | 0.4549855   | 0.03589367  |             |
| 0.07474511  | 0.09057125  | 0.5302968   | 0.7406989   | 0.3860595   | 0.4121839   |             |
| 0.106743883 | 11.6034     | 0.357907961 | 0.6390896   | 0.8265693   | 0.2297045   |             |
| 0.8458859   | 0.6307728   | 1.0799730   | 0.2668099   | 0           | 0.1682011   | 0.4887568   |
| 0.7454144   | 0.2849360   | 0.4051052   | 0.2623833   | 0.7375001   | 0.7024230   | 0.4094755   |
| 0.3061791   | 0.4750525   | 0.201665658 | 0.09517398  | 0.5927375   | 0.2989519   |             |
| 0.6346675   | 0.124843667 | 0.1918157   | 0.2956398   | 0.6188581   | 0.3666772   |             |
| 0.2916404   | 0.6058651   | 0.3044778   | 0.4846643   | 0.4412089   | 0.2452777   |             |
| 0.1829474   | 0.4397902   | 6.3167660   | 0.1061293   | 0.1803881   | 0.1530516   |             |
| 0.8705571   | 0.07319224  | 0.1575241   | 0.129801773 | 0.2749571   | 0.5259310   | 0.153787374 |
| 0.2417957   | 0           | 0.4431139   | 0.9751798   | 0.1653846   | 0.3696530   | 0.099465162 |
| 0.5012630   | 0.08200173  | 0.1273858   | 0.8933759   | 1.1832260   | 0.5271830   | 0.2290384   |
| 0.4083725   | 0.3027271   | 0.178617471 | 0.1939422   | 0.1254397   | 0.4304538   |             |
| 0.5585697   | 1.1330970   | 0.1552040   | 0.4813653   | 0.8817948   | 0.5856383   | 0.1819242   |
| 0.4071731   | 0.6560971   | 0.2476459   | 0.5810739   | 0.3486544   | 0.2337198   | 0           |
| 0.7998156   | 0.202021827 | 0.3528486   | 0.4641961   | 0.3722704   | 0.522237    |             |
| 0.6745475   | 0.1696738   | 0.305447372 | 0.1047006   | 0.4156315   | 0.3393822   |             |
| 0.4154403   | 0.353155845 | 0.4613535   | 0.7290286   | 0.6475068   | 0.7351786   |             |
| 0.6091775   | 0.4376030   | 0.3468913   | 0.3149828   | 0.5839663   | 0.3635759   |             |
| 0.4061931   | 0.5487685   | 0.6645139   | 0.228398243 | 0.201030465 | 0.585773    |             |
| 0.40387546  | 0.614445607 | 0.2411276   | 0.33301064  | 0.4763075   | 1.099717    |             |
| 0.5212255   | 0.127319445 | 0.6379533   | 0.1644906   | 0.5036342   | 0.091770403 |             |
| 0.1154766   | 0.6582354   | 0.4266373   | 0.6264962   | 0.09849416  | 0.2129899   |             |
| 0.1371009   | 0.1828599   | 0.1642539   | 0.3985720   | 0.5503824   | 0.424333914 |             |
| 0.2363380   | 0.169372364 | 0.7505461   | 0.1605732   | 0.3452024   | 0.3095287   |             |
| 0.1269366   | 0.7481022   | 0.4864437   | 0.4810794   | 0.5746423   | 0.467158446 |             |
| 0.5852352   | 0.8539049   | 0.3942359   | 0.2899959   | 0.4042893   | 0.4885325   |             |
| 0.4720624   | 0.3356433   | 0.1176922   | 1.2281940   | 0.6243133   | 0.7858417   |             |

|             |             |             |             |             |             |             |
|-------------|-------------|-------------|-------------|-------------|-------------|-------------|
| 0.6034103   | 0.2783432   | 0.587226637 | 0.1883669   | 0.8987268   | 0.6537313   |             |
| 0.4312730   | 0.3291272   | 0.1929456   | 0.1375410   | 0.4224861   | 0.1168886   | 0.3143227   |
| 0.445427048 | 0.085268772 | 1.5324180   | 0.8168830   | 0.4187378   | 0.3843092   | 0.1941473   |
| 0.3668680   | 0.5446344   | 0.5642107   | 0.9767710   | 0.8375623   | 0.2149384   | 0.146709    |
| 0.9530390   | 0.9447680   | 0.4249118   | 0.1135555   | 0.7298482   | 0.2910902   | 0.474497862 |
| 0.3354615   | 0.1782762   | 0.5210938   | 0.5148757   | 0.2990317   | 0.1756088   |             |
| 1.3283550   | 0.9485998   | 0.5714830   | 0.3885812   | 0.3391302   | 0.288250113 | 0.4807227   |
| 0.8462547   | 0.2783087   | 0.4049863   | 0.3153607   | 0.417570415 | 0.2400551   |             |
| 0.1752737   | 0.3774791   | 0.1308894   | 0.3793073   | 0.1525109   | 0.703489289 |             |
| 0.8439028   | 0.8649784   | 0.4510919   | 0.2881355   | 0.368330352 | 0.1590862   |             |
| 0.3058636   | 0.0881162   | 0.089363775 | 0.176482701 | 0.3025492   | 0.2105478   |             |
| 0.3900578   | 0.6285050   | 0.8354211   | 0.3901910   | 0.3443838   | 0.09620677  | 0.3267563   |
| 0.4474236   | 0.02241311  | 0.6102607   | 0.64045246  | 0.2967434   | 0.6517910   | 0.212247    |
| 0.2839788   | 0.09826353  | 0.7133781   | 0.3062816   | 0.07989702  | 0.3167231   |             |
| 0.2638078   | 0.5336855   | 0.2211845   | 0.8501796   | 0.5200812   | 0.3928939   |             |
| 0.3122870   | 0.6856538   | 0.1368204   | 0.4714707   | 0.1381158   | 0.8514916   |             |
| 0.08885157  | 0.1708316   | 0.5351903   | 0.1927642   | 0.3226473   | 0.8428709   |             |
| 0.08355267  | 0.4133557   | 0.4388650   | 0.3630090   | 0.5111093   | 0.20908     | 0.06056544  |
| 0.1037476   | 0.6429571   | 0.5709094   | 1.29701     | 0.4486449   | 0.2299745   |             |
| 1.0440040   | 0.3861990   | 0.2639352   | 0.3669590   | 0.5697769   | 0.4944111   | 0.411621    |
| 0.517859066 | 0.4042491   | 0.1679038   | 0.4588368   | 0.1038817   | 0.2826951   |             |
| 0.181367994 | 0.414865491 | 0.1476327   | 0.295922412 | 0.7568858   | 0.5064204   | 0           |
| 0.2744289   | 0.5718796   | 0.2486107   | 0.4181509   | 0.1415153   | 0.2959636   |             |
| 0.1187938   | 0.7847294   | 0.432540513 | 0.3584936   | 0.8591239   | 0.2764986   |             |
| 0.4232545   | 0.7453356   | 0.4077905   | 0.4729275   | 0.1785501   | 0.1964321   |             |
| 0.2150239   |             |             |             |             |             |             |
| AL136084.3  | 0.6408275   | 3.6052860   | 0.7023317   | 4.109084555 | 0.142470105 | 0.5757167   |
| 2.4814781   | 1.7991964   | 3.514222    | 0.511860    | 0.4487706   | 2.470954485 | 1.6101041   |
| 5.47243491  |             |             |             |             |             |             |
| 3.157188251 | 0.05443193  | 0.5300935   | 1.8798340   | 0.4868812   | 0.1634272   |             |
| 0.429602124 | 1.75433     | 0.1415353   | 0.03671464  | 0.8243399   | 0.7856667   |             |
| 0.4644774   | 0.1753007   | 5.6066410   | 0.374333255 | 2.0436240   | 0.177699203 | 0           |
| 0.04440425  | 0.5686815   | 0.293680625 | 0.2754449   | 0.2027130   | 0.5220974   |             |
| 1.7451440   | 0.3351258   | 0.0885821   | 0.2073721   | 1.1164170   | 0.06564991  | 0.3181678   |
| 0.1270220   | 0.2141667   | 0.0690156   | 0.4128858   | 0.3775560   | 0.5717038   | 0.7825291   |
| 0.313302421 | 0.2128533   | 0.04469052  | 0.25201     | 0.1043501   | 1.0865030   | 0.8751733   |
| 0.6506223   | 0.2955651   | 1.5948690   | 0.2334165   | 0.3214093   | 0.246401069 |             |
| 1.8084290   | 0.03812694  | 0           | 0.557654392 | 0.2074157   | 0.3575789   | 0.2072617   |
| 0.906196342 | 0.03128782  | 0.4645447   | 0.3082251   | 0.2885105   | 0.1423685   | 0           |
| 0.05150933  | 0.2504942   | 0.5896405   | 0.8306518   | 0.32752934  | 0.3840633   |             |
| 0.3296938   | 0.9743899   | 0.2083021   | 0.2893862   | 0.0419546   | 0.440135003 |             |
| 0.07658528  | 0.1212986   | 0.04795873  | 0.082405539 | 1.0049270   | 0.6784212   |             |
| 0.07036096  | 0.04995679  | 0.03467674  | 1.1765320   | 0.1230111   | 0.3436348   |             |
| 0.1151395   | 0.3971613   | 1.225670227 | 1.33652     | 0.588706345 | 0.07412371  |             |
| 0.06054835  | 0.7193308   | 0.6232784   | 0.2363602   | 0.2614097   | 0.7957413   | 0           |



0.2809227 1.1479240.3458225 0.2379443 0.05125684 0.5738621  
1.0906060.1833061.1916260 0.9917667 2.315594916 0 1.4928063.366475  
0.2789463 0.608150756 0.5784328 0.4114713 0.4306632 0.1701137  
0.1522144 0.6899259 0 0.4905859 0.1292788 0.1463046 0.2037009  
0.3060499 1.5423990.04923692 0.1004256 3.9053130.1038549 0.662148  
0.1644315 0.06021935 0.5357590.5840422 0.299657676 0.1923035  
0.8752303 0.1541814 0.9694677 0.3452732 0.2057931 0.276871134  
0.05813813 0.1711949 0.1772954 0 0.3992276 1.3298910.150012  
0.04736439 4.0601420.621499286 0.3374108 0.2327826 0.1123323  
0.2743825 0.4026494 0.9072538 0.1339928 0 1.3298850.1012808  
1.1769992.2394060.1477172 0 1.4153330.2602329 0.1089876 0.05858858  
1.218420176 1.4732840.3445695 0.6332648 0.2137792 0.9388348  
0.1180760.212560756 0.04857409 0.1577661 0.2024366 0 4.128786013  
0.9339805 0.5073308 1.4313170.1058505 0.2231192 0.03383643  
0.1931212 0.3094538 0.2322183 0.8674710.1696018 0.3637027  
0.05138168 1.033124854 0.27979411 0.1482325 0.843170521 1.106710151  
0.6712025 0 0.6155728 2.3956990.2539045 0 0.1366005 0.03815633  
0.1168263 0 0.4821607 0.1665694 0.5481172 0.1453262 0.06854207  
0 0.2862256 0.03635777 1.8288680.03698215 0.6994113 0.295293874  
1.3979740.424318283 1.7522480.8939428 0.2402263 0 0.1766703  
0.1665933 0.1846451 1.24348 0 1.430420006 1.1403421.48558 0.2743487  
0.04036162 0.9244188 0 0.5475135 0.05190536 3.5709260.1709399 0  
0.5468671 0.6718609 0.3389732 0.081730177 0.5898803 0.2886571  
0.2599608 0.6634293 0.6871186 0.1074166 0.1914294 0.183755  
0.7591987 0.1640528 0.286128536 0.059338519 0.07899331 0.6121971  
3.4438130.1945023 0.1621284 1.3925640.6064176 0.1963170.9224971  
0.3885729 0.2393210.03403159 0.3839693 1.2210040.3599777 0.7375504  
0.1451146 1.0353561.452892997 0.09337902 0.2977497 0.9889884  
0.05512337 0 0.3910596 2.5335471.0268690.3767636 0.06009191  
0.1348575 0.802372751 1.9557420.2355634 6.69562 1.3441120.4876876  
0.226012233 0.2126145 1.7076210.4503216 0.4857915 0.4575304  
0.07075487 0.623073864 1.0067520.7022613 0.08968993 2.0385530.768963024  
0.2214160.1419003 0.4905604 0.746258767 0.049125709 1.6843510  
0.5922352 0.5145605 0.2114070.3620451 0.05325702 0.4017016  
0.7028408 0.05661127 0.1559728 0.08493605 0.364656045 0.05162584  
0.1823764 0.2954053 0.3593105 0.3191141.53445 0.3789178 0.5560032  
0.1469384 0.3671676 0 0.3958001 0.2704639 0.09048109 0.06075884  
0.4346409 0.2672019 0 0.05047636 0.08238408 0.4740423 0.1648848  
0.2377633 0.2482925 0.4292626 0.9389444 0 0.05814429 0.9040558  
0.1527030.08420597 0 0.1091241 0.7586546 0.3609896 2.753438  
0.1324319 0.09757717 0.1248848 0.1920471 0.09374483 1.388572  
0.4040793 0.1021467 0.1132879 0.2457575 0.3525501 0 1.025979  
0.1402130.6877326 0.1445825 1.0015220.631069729 2.398470651 0.4623191  
1.0590806 0.1859 0.05421813 3.3526290.2350462 0.6301206 0.7414635

|             |             |             |             |             |             |             |
|-------------|-------------|-------------|-------------|-------------|-------------|-------------|
| 0.7066927   | 0.9191511   | 0.06865367  | 0.9093543   | 0           | 0.280937855 | 0.3742135   |
| 0.4159055   | 0.5497581   | 0.1472713   | 0.3577096   | 0.4918876   | 0.3117886   | 0           |
| 1.5310070   | 0.2618614   |             |             |             |             |             |
| AC058791.1  | 0.06018898  | 0.009517489 | 0.03213713  | 0.03958369  | 0.058672023 |             |
| 0.08621512  | 0.07569793  | 0.1089625   | 0           | 0.03620225  | 0.04400302  | 0.047329684 |
| 0.05643175  | 0.053098803 | 0.008497993 | 0.08219256  | 0.03638384  | 0.08008477  |             |
| 0.05141215  | 0.004486837 | 0.039315266 | 0           | 0.004857255 | 0.01511982  | 0.01257332  |
| 0.02995863  | 0.009809283 | 0.02887692  | 0.04664498  | 0.019269735 | 0.02922239  |             |
| 0.004878671 | 0           | 0.006095518 | 0           | 0.025196567 | 0.006301872 | 0.009275695 |
| 0.01194501  | 0.07985388  | 0.09200765  | 0.1398393   | 0.02209866  | 0.01998968  |             |
| 0.01802396  | 0.01871826  | 0.1511184   | 0.02204952  | 0.0047370   | 0.02267128  | 0           |
| 0.01961991  | 0.008263104 | 0.055296072 | 0.02921907  | 0           | 0.0276754   | 0.009549658 |
| 0.04474437  | 0.007508621 | 0.07145046  | 0.0067622   | 0.007549413 | 0.02403139  |             |
| 0.3970882   | 0.016912143 | 0.05430446  | 0.03663668  | 0.04074947  | 0.020877561 |             |
| 0.01423632  | 0           | 0.0113806   | 0.062198279 | 0.06871972  | 0.07174077  | 0.04231108  |
| 0.007920957 | 0.01954339  | 0.01763935  | 0.02121257  | 0.02292411  | 0.03679177  |             |
| 0.007863884 | 0.017984413 | 0.03514776  | 0.06336141  | 0.02907776  | 0.02859432  |             |
| 0.1412444   | 0.01151849  | 0.010069797 | 0.005256557 | 0.02497659  | 0.01975036  |             |
| 0.113120799 | 0.0459832   | 0.01552152  | 0.04829341  | 0.01371547  | 0.01428057  |             |
| 0.0461447   | 0.07598766  | 0.01347768  | 0.0210741   | 0.01817321  | 0.056083931 |             |
| 16.496870   | 0.006216435 | 0.06105124  | 0.01662334  | 0           | 0.02851983  | 0.0139054   |
| 0.01794228  | 0.01456454  | 0           | 0.006427198 | 0.01167255  | 0.007912032 | 0           |
| 0.03580725  | 0.008806531 | 0.008387673 | 0.01422421  | 0.006499738 | 0.02269051  |             |
| 0.028897213 | 0.02272956  | 0.03235617  | 0.03115463  | 0.006381979 | 0.023852245 |             |
| 0.01832386  | 0.008069146 | 0.02364743  | 0.08173226  | 0.04178993  | 0.01052316  |             |
| 0.004847715 | 0.02525413  | 0.01774653  | 0.02677828  | 0.03495337  | 0.004668053 |             |
| 22.528090   | 0.05407131  | 0.006892878 | 0           | 0.00475217  | 0.01398388  | 0.04514411  |
| 0.008266509 | 0.03151946  | 0.02915396  | 0.052887853 | 0.03299767  | 0.02669905  |             |
| 0.007054998 | 0           | 0.0473968   | 0.1694994   | 0.012669004 | 0           | 0.007833498 |
| 0.04056322  | 0.009482535 | 0.04110247  | 0.08813171  | 0.03603713  | 0.006501866 |             |
| 0.03680607  | 0.07678373  | 0.0370540   | 0.01028015  | 0           | 0.04145476  | 0.06523614  |
| 0.01839363  | 0.0168473   | 0.0294448   | 0.01390315  | 0.02393638  | 0.002984569 |             |
| 0.01351842  | 0.01480242  | 0.03330642  | 0           | 0.1047276   | 0.0160853   | 0.006432944 |
| 0.03745232  | 0           | 0           | 0.005869235 | 0.02147949  | 0.04322315  | 0.052522048 |
| 0.08001511  | 0.007219025 | 0.009263045 | 0           | 0.026989146 | 0.04407239  | 0.0609376   |
| 0.01455419  | 0.009686962 | 0.006125662 | 0.01393451  | 0.02651039  | 0.01415992  | 0           |
| 0.06946369  | 0.0232818   | 0.01997067  | 0.02116     | 0.032727797 | 0.024005162 |             |
| 0.0508709   | 0.025721066 | 0.006905534 | 0           | 0.007952998 | 0           | 0.009135152 |
| 0.01493756  | 0.04865052  | 0.0281274   | 0.1414218   | 0.01603713  | 0.008766685 |             |
| 0.0110313   | 0.01143276  | 0.09405232  | 0.03989881  | 0.02822699  | 0.04747539  |             |
| 0.01309704  | 0.03992761  | 0.05230306  | 0.005076662 | 0.0320035   | 0.013511988 |             |
| 0.04515401  | 0.038831713 | 0.01850284  | 0.00438266  | 0.0188438   | 0.01689646  |             |
| 0.008084036 | 0.04573763  | 0.03379579  | 0.03282626  | 0.02195787  | 0.089253849 |             |
| 0.01677198  | 0           | 0.01129823  | 0.07202744  | 0.05517305  | 0.02333438  | 0.05261129  |

|             |             |             |             |             |             |             |
|-------------|-------------|-------------|-------------|-------------|-------------|-------------|
| 0.02137566  | 0.04047463  | 0.007821829 | 0           | 0.0204737   | 0.08069999  | 0.01994227  |
| 0.044877483 | 0           | 0.02641661  | 0.01784284  | 0.03903048  | 0.09432303  | 0.007372719 |
| 0           | 0.00504493  | 0.01488824  | 0.04504015  | 0.032731506 | 0.04072797  | 0.01626551  |
| 0           | 0.05091084  | 0.07342492  | 0.007418636 | 0.01274412  | 0           | 0.07410999  |
| 1.57293     | 0.04000552  | 0.09855714  | 0.01868651  | 0.02875021  | 0.0515727   | 0.01411867  |
| 0.02169557  | 0.009960181 | 0           | 0.024174959 | 0.006409223 | 0.01362436  | 0.05430468  |
| 0.007566967 | 0.02448517  | 0.02684102  | 1.4569510   | 0.0100687   | 0.01149324  |             |
| 0.02474704  | 0.004628083 | 0.015019684 | 0.00706503  | 0.06467313  | 0.01519223  |             |
| 0.04166369  | 0.08033578  | 0.044322063 | 0.02084735  | 0.004783894 | 0           | 0.05001465  |
| 0.00966257  | 0.009712754 | 0.152734648 | 0.01727501  | 0.04131502  | 0.2093046   |             |
| 0.03670018  | 0.030159454 | 0           | 0.02921867  | 0.02525281  | 0.0512207   | 0.053949183 |
| 0.0408029   | 0.01340887  | 0.02709936  | 0.007063542 | 0.02902054  | 0           | 0.0219323   |
| 0.06126989  | 0.03972758  | 0.04662729  | 0.02569308  | 0.005829726 | 0.03893364  |             |
| 0.03543425  | 16.923930   | 0.04055125  | 0.009864747 | 0.01877393  | 0.01858579  |             |
| 0.02600765  | 0.02035317  | 0.01008536  | 0.01680077  | 0.02832342  | 0.03018488  |             |
| 0.03712747  | 0           | 0.1084274   | 0.01193292  | 0           | 0.01742699  | 0.04850339  |
| 0.1432490   | 0.01626834  | 0.01131714  | 0.06527711  | 0.01363357  | 0.03682894  |             |
| 0.0392280   | 0.03192663  | 0           | 0.02620256  | 0.005779615 | 0.04882548  | 0.01997309  |
| 0           | 0.03468796  | 0.03779735  | 0.009089682 | 0.02009211  | 0.03428669  | 0.02636293  |
| 0.01930299  | 0.02459533  | 0.02521332  | 0.05608804  | 0.1632897   | 0.01349438  |             |
| 0.02419786  | 0.019788111 | 0.02725926  | 0.006415835 | 0           | 0.009923658 | 0.03437054  |
| 0.017325804 | 0.018291443 | 0           | 0.056538022 | 0.008506368 | 0.03721351  | 1.265623    |
| 0.03226556  | 0.01365769  | 0.006785542 | 0.0627712   | 0.01802499  | 0.01884863  |             |
| 0.04539275  | 0.005997119 | 0.071621207 | 0.05136952  | 0.04281954  | 0.0679204   |             |
| 0.08086569  | 0.01473119  | 0.04674672  | 0.04755582  | 0.02729058  | 0.04503564  |             |
| 0.0205409   |             |             |             |             |             |             |
| AC005070.3  | 0.1678740   | 0.4716229   | 0.2395224   | 0.526256629 | 0.082730656 | 0.2344523   |
| 0.7319183   | 0.4477591   | 0.4549261   | 0.5833954   | 0.2340042   | 0.200212074 |             |
| 0.5172164   | 0.304836497 | 0.534082473 | 0.4425115   | 0.2286654   | 0.333394    |             |
| 0.1988403   | 0.3091034   | 0.130671999 | 0.1940416   | 0.1350229   | 0.1644666   |             |
| 0.3191228   | 0.2027676   | 0.1304123   | 0.2850259   | 0.1127518   | 0.0931589   |             |
| 0.2472307   | 0.194582642 | 0.3808399   | 0.2210144   | 0.08491536  | 0.060905988 |             |
| 0.1827972   | 0.04484304  | 0.3464864   | 0.09651274  | 0.1019352   | 0.124922    |             |
| 0.2804425   | 0.1530125   | 0.2723007   | 0.1583625   | 0.1053716   | 0.02664942  |             |
| 0.09160347  | 0.08220267  | 0.1957519   | 0.09485183  | 0.09986926  | 0.118812019 |             |
| 0.1236013   | 0.3336588   | 0.2174182   | 0.1385025   | 0.2403502   | 0.2994765   |             |
| 0.3886030   | 0.1798040   | 0.09124347  | 0.1258606   | 0.1955260   | 0.091981351 | 0.1593951   |
| 0.4364714   | 0.3529618   | 0.050465941 | 0.2494907   | 0.0395508   | 0.123793    |             |
| 0.159744503 | 0.3270323   | 0.1926825   | 0.1193217   | 0.5265371   | 0.3070661   |             |
| 0.2878094   | 0.1880110   | 0.5402760   | 0.1067212   | 0.1853362   | 0.445593393 | 0.1274405   |
| 0.05469976  | 0.1757194   | 0.08639894  | 0.2720697   | 0.2018609   | 0.066937891 |             |
| 0.05717847  | 0.0855302   | 0.3182749   | 0.314455299 | 0.1667282   | 0.05627871  |             |
| 0.2217992   | 0.1989209   | 0.0632857   | 0.1394282   | 0.2347021   | 0.2443403   |             |
| 0.1719259   | 0.1537511   | 0.086270519 | 8.4816720   | 0.112699322 | 0.0491917   |             |

|             |             |             |             |             |             |
|-------------|-------------|-------------|-------------|-------------|-------------|
| 0.3817338   | 0.1856474   | 0.2412868   | 0.1400525   | 0.5855043   | 0.07041178  |
| 0.09124939  | 0.3340248   | 0.1340225   | 0.5833195   | 0.03947753  | 0.2040975   |
| 0.2942852   | 0.1277247   | 0.4815304   | 0.2922574   | 0.08641262  | 0.2742414   |
| 0.162986399 | 0.1538394   | 0.4627568   | 0.2761294   | 0.1311272   | 0.07207056  |
| 0.16979     | 0.1560401   | 0.1143227   | 0.07055927  | 0.2441221   | 0.2034954   |
| 0.1464757   | 0.05087094  | 0.1876766   | 0.3074645   | 0.1182867   | 0.197466    |
| 5.6937890   | 0.2450681   | 0.2082712   | 0.08246428  | 0.1608195   | 0.05070347  |
| 0.1909668   | 0.119892492 | 0.3428545   | 0.3875957   | 0.085228195 | 0.1276209   |
| 0.1774791   | 0.1449554   | 0.3216903   | 0.08592685  | 0.3755764   | 0.168431684 |
| 0.1350404   | 0.1230801   | 0.08824569  | 0.2234847   | 0.1573109   | 0.1826014   |
| 0.1835536   | 0.04714958  | 0.2033574   | 0.123736139 | 0.2015284   | 0.1158635   |
| 0.2050085   | 0.2200279   | 0.3117515   | 0.07167772  | 0.3631040   | 0.3054289   |
| 0.1708199   | 0.1176251   | 0.2386718   | 0.3498984   | 0.2369095   | 0.4114806   |
| 0.1945644   | 0.1187325   | 0.009041107 | 0.7484769   | 0.085524609 | 0.3168585   |
| 0.1643575   | 0.1146169   | 0.2766526   | 0.08653492  | 0.1828408   | 0.077585479 |
| 0.05641277  | 0.2268509   | 0.1007592   | 0.2038538   | 0.293575811 | 0.2179089   |
| 0.2419936   | 0.1495188   | 0.2809878   | 0.2591252   | 0.2133255   | 0.07209203  |
| 0.2267593   | 0.2889564   | 0.1559164   | 0.4314612   | 0.09654754  | 0.3580406   |
| 0.17140658  | 0.092841734 | 0.4426806   | 0.093260735 | 0.050076866 | 0.1511311   |
| 0.086509142 | 0.2749659   | 0.3312270   | 0.09026894  | 0.058799835 | 0.5099287   |
| 0.1329415   | 0.3488894   | 0.116551186 | 0.2666522   | 0.3592636   | 0.1515643   |
| 0.4484680   | 0.09097496  | 0.1885328   | 0.0158293   | 0.5368611   | 0.05057148  |
| 0.1043076   | 0.2431312   | 0.212300597 | 0.1637217   | 0.078221099 | 0.2348099   |
| 0.2171752   | 0.1537308   | 0.2858988   | 0.06839351  | 0.7393602   | 0.2246539   |
| 0.2539160   | 0.4423109   | 0.18698108  | 0.2432508   | 0.2267560   | 0.1411040   |
| 0.1000246   | 0.1551128   | 0.1635091   | 0.1205632   | 0.1521903   | 0.557762    |
| 0.0991121   | 0.1237243   | 0.05573449  | 0.1205128   | 0.216958715 | 0.1794238   |
| 0.1277102   | 0.1365793   | 0.1415187   | 0.3040011   | 0.1514835   | 0.1985013   |
| 0.1158504   | 0.0989680   | 0.1270180   | 0.213623176 | 0.098449016 | 0.4521516   |
| 0.1305901   | 0.3076585   | 0.2984978   | 0.08966287  | 0.1694304   | 0.06707415  |
| 0.05699946  | 1.79635     | 0.03223423  | 0.4169123   | 0.1806787   | 0.1853226   |
| 0.2025778   | 0.3327491   | 0.1136270   | 0.2166848   | 0.02240566  | 0.175309565 |
| 0.1549259   | 0.1399664   | 0.3391067   | 0.1371834   | 0.1085084   | 0.1297621   |
| 0.4314380   | 0.2500366   | 0.3688862   | 0.4027377   | 0.217836511 | 0.2476285   |
| 0.2214676   | 0.1468927   | 0.0431618   | 0.08900391  | 0.251771429 | 0.2267682   |
| 0.3700412   | 0.6350624   | 0.09067282  | 0.07007006  | 0.05869499  | 0.177213752 |
| 0.1600713   | 0.5076627   | 0.1860066   | 0.2328714   | 0.11542887  | 0.1959217   |
| 0.05885697  | 0.06104195  | 0.092859297 | 0.163009721 | 0.1602740   | 0.04321649  |
| 0.1228228   | 0.1792794   | 0.0789181   | 0.1802016   | 0.3446007   | 0.1110777   |
| 0.1714836   | 0.1033166   | 0.09833478  | 0.3100198   | 0.10755623  | 0.06852228  |
| 12.5269     | 0.1470328   | 0.2682607   | 0.1663969   | 0.2396064   | 0.3064745   |
| 0.03074898  | 0.3169226   | 0.3350439   | 0.3628609   | 0.0729639   | 0.3870286   |
| 0.1050825   | 0.1411277   | 0.04807442  | 0.2026591   | 0.01053128  | 0.8123336   |
| 0.1776893   | 0.3834126   | 0.1367808   | 0.04930938  | 0.1071055   | 0.05341448  |
| 0.06095779  |             |             |             |             |             |

|              |             |             |             |             |             |
|--------------|-------------|-------------|-------------|-------------|-------------|
| 0.1536562    | 0.1543483   | 0.06817846  | 0.1646781   | 0.3073550   | 0.3442326   |
| 0.2595030    | 0.1328617   | 0.07785969  | 0.3426189   | 0.1428172   | 0.5180514   |
| 0.05525262   | 0.07434626  | 0.2099693   | 0.05945265  | 0.1340822   | 0.3474183   |
| 0.1973547    | 0.3914288   | 0.1608526   | 0.406576124 | 0.16473     | 0.2326286   |
| 0.1548531    | 0.1559207   | 0.2195729   | 0.153561891 | 0.140013183 | 0.1022716   |
| 0.156189261  | 0.09252845  | 0.5037411   | 0.8077710   | 0.2388548   | 0.1155484   |
| 0.1517327    | 0.1089265   | 0.1252942   | 0.1097249   | 0.3116734   | 0.06658661  |
| 0.06208606   | 0.4053939   | 0.07296865  | 0.1099526   | 0.5519353   | 0.144386    |
| 0.3161222    | 0.3545764   | 0.1451489   | 0.1489565   |             |             |
| AC036108.3   | 0.43141815  | 7.13050     | 0.1663648   | 0.038875156 | 0.181067955 |
| 4.1507527    | 3.0681      | 7.2238548   | 5.486810    | 0.8410707   | 0.932926939 |
| 10.243246341 | 0.4016820   | 0.5389647   | 0.0106301   | 0.05527622  | 0.03752048  |
| 0.023483418  | 0.2301535   | 0.1624722   | 0.1926662   | 0.1952645   | 0.4652596   |
| 0.1581980    | 0.2702263   | 0.08358459  | 0.053713396 | 0.9285974   | 0.209813836 |
| 0.02596067   | 0.3568098   | 0.2517961   | 0.084280964 | 0.4065308   | 0.06648563  |
| 0.3710136    | 0.7822399   | 0.05495713  | 0.0363163   | 0.1055981   | 0.6527224   |
| 0.1722544    | 0.0521762   | 0.04166057  | 0.1756055   | 0.04527135  | 0.1895851   |
| 0.007739403  | 0.09375344  | 0.08884148  | 0.02935904  | 0.1047171   | 0.2711648   |
| 0.1818388    | 0.1197863   | 0.08314842  | 0.8431757   | 0.1387038   | 0.2908176   |
| 0.02705606   | 0.1339726   | 0.0351385   | 0.111119795 | 0           | 0.2938637   |
| 0.764850259  | 0.08503501  | 0.0195464   | 0.03398875  | 0.111455041 | 0.3181143   |
| 0.06665791   | 0.1347885   | 0.1797883   | 0.5681089   | 0.0316085   | 0.4899255   |
| 0.2327778    | 0.2637133   | 0.1456126   | 0           | 0.0839765   | 0.1405725   |
| 0.008539843  | 0.04218339  | 0.06880116  | 0.042103563 | 0.03767756  | 0.02983756  |
| 0.3067245    | 0.094595525 | 0.1318380   | 0.1390675   | 0.1153846   | 0.1228859   |
| 0.06255284   | 0.1929390   | 0.1210353   | 0.1288057   | 0.1321717   | 0.08684039  |
| 0.176633813  | 1.8447250   | 0.148525666 | 0.07293308  | 0.3177375   | 0.5177253   |
| 0.05678396   | 0.2048775   | 0.02143423  | 0.1652915   | 0.03607708  | 0.1382052   |
| 0.06972133   | 0.05671127  | 0.09104754  | 0.07565028  | 0.1454387   | 0.1157251   |
| 0.1052109    | 0.4672947   | 0           | 2.4938040   | 0.172606066 | 0.04887577  |
| 0.08063895   | 0.4879389   | 0.128224752 | 0.1678238   | 0.2891871   | 0.2542474   |
| 0.02092266   | 0.09152573  | 0.1005695   | 0.02316472  | 0.05028184  | 0.111302    |
| 0.1199621    | 0.05010723  | 0.02788277  | 2.6431940   | 0.0403717   | 0.0658750   |
| 0.06244745   | 0.008352719 | 0.08089515  | 0.039501374 | 0.01255127  | 0.2612095   |
| 0.09460729   | 0.07973812  | 0.05899633  | 0.9220989   | 0.0849318   | 0.1181177   |
| 0.04540397   | 0.05720427  | 0.03743224  | 0.009691533 | 0.2548808   | 0.09002009  |
| 0.4060953    | 0.2060284   | 0.01553453  | 0.9296366   | 0.081535506 | 0.1217301   |
| 0.02863044   | 0.1596514   | 0.07499309  | 0.1980909   | 0.1416954   | 0.4687663   |
| 0.1207568    | 1.0974720   | 0.1494809   | 0.5218569   | 5.6975540   | 0.02422407  |
| 0.9947136    | 0.04267547  | 0           | 0.2401979   | 0.092219153 | 0.5011028   |
| 0.1510528    | 0.2454029   | 0.2651518   | 0.1678146   | 0.069715482 | 0.1035534   |
| 0.1207360    | 0.03319748  | 0.1896406   | 4.078587226 | 0.1196586   | 0.5095813   |
| 0.1130138    | 0.3008784   | 0.02927137  | 0.1276229   | 0.03958733  | 0.04228933  |
| 0.27609      | 0.3556404   | 0.2039614   | 0.09542951  | 0.1179648   | 0.156389234 |

|             |             |             |             |             |             |
|-------------|-------------|-------------|-------------|-------------|-------------|
| 0.080295788 | 0.7535658   | 0.122907686 | 0.131991919 | 0.3695213   | 0.06650572  |
| 0.1009475   | 2.1389570   | 0.2141367   | 0.106551363 | 0.2240105   | 0.03754343  |
| 0.1660385   | 0.115201508 | 0.1054257   | 0.09560473  | 0.2846374   | 0.157291    |
| 0.4383671   | 0.1296345   | 0.2033980   | 0.1430950   | 0.07497879  | 0.04851749  |
| 0.056495958 | 0.06742741  | 0.06958376  | 0.9007331   | 1.3036690   | 0.06753359  |
| 0.01931472  | 0.2253864   | 0.3229852   | 0.5097942   | 0.0786940   | 0.646855354 |
| 0.2938637   | 0.1169374   | 0.1664642   | 0.3640386   | 0.08568414  | 0.04878253  |
| 0.2244662   | 0.1957745   | 0.1772901   | 0.1308177   | 0.008905852 | 0.3424164   |
| 0.04131681  | 0.02382345  | 0.160834729 | 0.005374122 | 0.0946735   | 0.07105143  |
| 0.01554221  | 0.07512017  | 0.05284562  | 0.03139242  | 0.02410712  | 0.02667871  |
| 0.09864415  | 0.093844174 | 0.204348825 | 0.1943111   | 0.05736795  | 3.848983    |
| 0.6299528   | 0.1329368   | 0.8068929   | 0.1077333   | 0.08048485  | 0.159242    |
| 0.04779142  | 0.1569846   | 0.04464659  | 0.2003494   | 0.6931105   | 0.04216613  |
| 0.01727865  | 0.06544252  | 0.1033489   | 0.072199774 | 0.3981428   | 0.1139316   |
| 0.7082024   | 0.03615862  | 0.009750167 | 0.01603242  | 0.4491623   | 0           |
| 0.06898111  | 0.2709114   | 0.017942828 | 2.0002880   | 0.1287664   | 0.1814895   |
| 0.2417512   | 0.0239927   | 0.465942931 | 0.2590087   | 0.01714482  | 0.1538501   |
| 0.05974855  | 0.09234486  | 0.02320612  | 0.131371196 | 0.1857338   | 0.2961347   |
| 0.1838526   | 0.06028386  | 0.090072781 | 0.07261983  | 0.02327016  | 0.2715078   |
| 0.122378632 | 0.233626969 | 0.06093     | 0.1121296   | 0.07284029  | 0.2193946   |
| 0.1993441   | 0.04452871  | 0.1484711   | 0.05855543  | 0.1627179   | 0.02785097  |
| 0.05115582  | 0.06267881  | 0.132888394 | 0.0169322   | 1.1364970   | 0.1647075   |
| 0.2298003   | 0.3289399   | 0.4514605   | 0.1165098   | 0.02431432  | 0.1927709   |
| 0.1705997   | 0.2436174   | 0.1009666   | 0.04989741  | 0.05935181  | 0.1494572   |
| 0.06177302  | 0.1940526   | 0.0416373   | 0.3642142   | 0.03152363  | 0.2429312   |
| 0.08111813  | 0.07798139  | 0.0325739   | 0.02639797  | 0.04016793  | 0.1316266   |
| 0.09535055  | 0.1078223   | 0.1752919   | 0.2071335   | 0.1847051   | 0.04772054  |
| 0.02073524  | 0.05327866  | 4.5605040   | 0.1845983   | 0.2960303   | 0.06826598  |
| 0.05248951  | 0.1152988   | 0.9108448   | 0.07831292  | 0.2596403   | 0.0650231   |
| 0.3465943   | 0.08672179  | 0.082737513 | 0.2279514   | 0.03832245  | 0.06444626  |
| 0.9033149   | 0.103488835 | 0.211229609 | 0.05896761  | 0.231570855 | 0.01016188  |
| 0.2133890   | 0.9621431   | 0.1975437   | 0.2556137   | 0.0810615   | 0.2999511   |
| 0.1830307   | 0.04878676  | 0.1762382   | 0.1361214   | 0.04607087  | 0.03068355  |
| 0.3410207   | 0.0631082   | 0.02415096  | 0.4927492   | 0.0558446   | 0.1079412   |
| 0.2200628   | 0.8070077   | 0.2147126   |             |             |             |
| AL731566.2  | 0.2140329   | 0.2042747   | 0.07958792  | 0.049014703 | 0.096867903 |
| 0.3321307   | 0.1249778   | 0.1199318   | 0.1350962   | 0.1195403   | 0.2179478   |
| 0.130236042 | 0.5745434   | 0.241082822 | 0.196423406 | 0.1973825   | 0.3003498   |
| 0.1762940   | 0.00848818  | 0.4222445   | 0.194729305 | 0.2120533   | 0.5533359   |
| 0.2080244   | 0.4151726   | 0.2670942   | 0.2348303   | 0.5085440   | 0.1668575   |
| 0.243910872 | 0.2798289   | 0.483283118 | 0.08969632  | 0.3220397   | 0.2448824   |
| 0.024959821 | 0.3745596   | 0.2756562   | 0.5916385   | 0.2373107   | 0.1898815   |
| 0.1505711   | 0.6202457   | 0.5060475   | 0.4017286   | 0.5253676   | 0.172729    |
| 0.2790966   | 0.3206535   | 0.2620131   | 0.0534806   | 0.3433617   | 0.1500668   |

|             |             |             |             |             |             |
|-------------|-------------|-------------|-------------|-------------|-------------|
| 0.304313953 | 0.1809033   | 0.3342445   | 0.3541150   | 0.1261324   | 0.3857825   |
| 0.1611582   | 0.5455890   | 0.1116444   | 0.1246413   | 0.2512813   | 0.07284392  |
| 0.153571342 | 0.1921222   | 0.8295415   | 0.3251753   | 0.26426228  | 0.364316    |
| 0.02701379  | 0.3851836   | 0.37225044  | 0.3190970   | 0.1710865   | 0.2212103   |
| 0.3923266   | 0.3871952   | 0.1892974   | 0.5370054   | 0.3217068   | 0.07289216  |
| 0.2531748   | 0.029692386 | 0.1305657   | 0.1195544   | 0.4416698   | 0.1770353   |
| 0.5538394   | 0.1616454   | 0.241066887 | 0.3992161   | 0.2680374   | 0.4891196   |
| 0.056028959 | 0.3036743   | 0.0384392   | 0.07973274  | 0.1018995   | 0.1807594   |
| 0.09523152  | 0.1672748   | 0.5117901   | 0.3044429   | 0.2800382   | 0.244113948 |
| 5.0232190   | 0.123160519 | 0.06719734  | 0.5214598   | 0.1539714   | 0.5022552   |
| 0.4132425   | 0.1925484   | 0.1322538   | 0.1994390   | 0.2652837   | 0.1830788   |
| 0.3135076   | 0.1438066   | 0.4414387   | 0.4138261   | 0.3998401   | 0.6508609   |
| 0.1526477   | 0.2360844   | 0.4495463   | 0.159031643 | 0.1726226   | 0.3828451   |
| 0.1457368   | 0.2423439   | 0.019690109 | 0.1714326   | 0.3064109   | 1.015093    |
| 0.2313266   | 0.04599697  | 0.1737380   | 0.3361516   | 0.3613544   | 0.1538231   |
| 0.09947503  | 0.1154165   | 0.2157956   | 2.5343670   | 0.04463605  | 0.1479424   |
| 0.08046334  | 0.09415037  | 0.0808062   | 0.1614887   | 0.204720917 | 0.2601942   |
| 0.3249004   | 0.203742467 | 0.1198546   | 0.3306024   | 0.1048306   | 0.1647895   |
| 0.2738835   | 0.3964466   | 0.386957308 | 0.1317638   | 0.2327968   | 0.08036417  |
| 0.3209425   | 0.2262015   | 0.5820242   | 0.3867341   | 0.07514237  | 0.1909822   |
| 0.281712118 | 0.1529410   | 0.3033565   | 0.3903696   | 0.2280146   | 0.4562805   |
| 0.08812252  | 0.3644162   | 0.3198725   | 0.4083539   | 0.2984045   | 0.1679563   |
| 0.2907251   | 0.1339140   | 0.07331671  | 0.1466377   | 0.01474474  | 0.2593589   |
| 0.5842525   | 0.201795852 | 0.3462705   | 0.2049940   | 0.05219003  | 0.2907044   |
| 0.1536721   | 0.2676064   | 0.269777679 | 0.1210967   | 0.2741291   | 0.1835202   |
| 0.1801868   | 0.178237044 | 0.2315212   | 0.3449431   | 0.3243925   | 0.4478107   |
| 0.2932917   | 0.5444747   | 0.08753766  | 0.1052015   | 0.8026038   | 0.4095893   |
| 0.4868865   | 0.2885025   | 0.2212569   | 0.198123979 | 0.277428788 | 0.4871315   |
| 0.201711849 | 0.091208665 | 0.2607784   | 0.420174498 | 0.3541481   | 0.3921371   |
| 0.5179023   | 0.187418781 | 0.5263032   | 0.3113178   | 0.1235613   | 0.260529398 |
| 0.1457020   | 0.2076313   | 0.3105620   | 0.7509545   | 0.5592353   | 0.2463440   |
| 0.3708042   | 0.06908216  | 0.2346849   | 0.3245762   | 0.145004486 | 0.2050113   |
| 0.192334255 | 0.2214753   | 0.6222789   | 0.1866674   | 0.1534289   | 0.4804847   |
| 0.3020525   | 0.2231883   | 0.1300713   | 0.9304834   | 0.186654359 | 0.544583    |
| 0.9292663   | 0.4290293   | 0.3567534   | 0.09109108  | 0.1733635   | 0.1985408   |
| 0.6234807   | 0.04454926  | 0.7231779   | 0.1107737   | 0.2140807   | 0.07613499  |
| 0.08779953  | 0.30563373  | 0.4827693   | 0.1962630   | 0.4615188   | 0.2076387   |
| 0.8824584   | 0.2556206   | 0.1735416   | 0.2332180   | 0.3687089   | 0.5081375   |
| 0.475551438 | 0.336210761 | 0.3222536   | 0.1982112   | 0.1801160   | 0.4849001   |
| 0.2694608   | 0.2209266   | 0.2519696   | 0.2224656   | 0.5061790   | 0.3082304   |
| 0.5152753   | 0.2468125   | 0.1977783   | 0.7876086   | 0.7983679   | 0.02387968  |
| 0.6166622   | 0.1938431   | 0.239478115 | 0.4021035   | 0.2024452   | 0.1419575   |
| 0.1873967   | 0.09432544  | 0.1107868   | 0.5742008   | 0.08311743  | 0.7400412   |
| 0.2996219   | 0.4737418   | 0.165317331 | 0.06998647  | 0.2313475   | 0.3135309   |

|             |             |                   |                   |                   |             |
|-------------|-------------|-------------------|-------------------|-------------------|-------------|
| 0.09826719  | 0.05526455  | 0.343927311       | 0.3097721         | 0.1026771         | 0.9355546   |
| 0.1651491   | 0.1435767   | 0.1443224         | 0.252165929       | 0.3232398         | 1.068645    |
| 0.2134361   | 0.2878132   | 0.232369484       | 0.2174533         | 0.08040038        | 0.1111802   |
| 0.267791446 | 0.222676159 | 0.09543498        | 0.1771051         | 0.1118531         | 0.1749293   |
| 0.3114352   | 0.08205358  | 0.4465946         | 0.0505785         | 0.1592912         | 0.3079279   |
| 0.09897872  | 0.4812458   | 0.146925031       | 0.09360349        | 4.2573630.2410214 |             |
| 0.3175919   | 0.1653113   | 0.3477664         | 0.1717552         | 0.1092105         | 0.2664159   |
| 0.3467273   | 0.2899254   | 0.1196050.3141507 | 0.1640525         | 0.2891769         |             |
| 0.09850664  | 0.2854897   | 0.1007023         | 0.4690366         | 0.2427289         | 0.1745844   |
| 0.4951438   | 0.06735809  | 0.1800730.1945754 | 0.09252241        | 0.3218451         |             |
| 0.03953331  | 0.1490141   | 0.1903467         | 0.4675670.3761856 | 0.3462449         |             |
| 0.05731361  | 0.2372616   | 0.2028120.3901853 | 0.6413294         | 0.1792572         |             |
| 0.0725423   | 0.5630255   | 0.1624282         | 0.1665094         | 0.1736282         | 0.4621584   |
| 0.1782345   | 0.2796557   | 0.310367883       | 0.3825444         | 0.1482962         | 0.1558671   |
| 0.0655361   | 0.1053854   | 0.143025096       | 0.140930043       | 0.09313742        | 0.240029109 |
| 0.1544848   | 0.1843193   | 0                 | 0.5393654         | 0.2555547         | 0.3472923   |
| 0.01487969  | 0.1763422   | 0.2060953         | 0.4950642         | 0.118247093       | 0.1837581   |
| 0.5302151   | 0.06229835  | 0.08344362        | 0.5269614         | 0.1372074         | 0.235545    |
| 0.4956262   | 0.07435415  | 0.2797836         |                   |                   |             |

AC024075.1 1.0847243.2889721.0666472.086625933 0.801850977 2.1461412.438555  
2.6804763.0673281.3900521.0309281.478489165 4.0214340.505386825 2.389149998  
1.2691812.5146430.6254240.3613539 1.3665620.172706348 2.3508881.251784  
1.5055021.7306270.8071710.8618156 2.7907480.7285501 0.263353043  
0.9584944 3.514734009 0.2227459 2.0350320.8687495 0.265643807  
1.6609940.5976198 1.3992720.7483450.08981699 0.3561126 2.977005  
1.6781810.4222756 1.8272590.6808630.2582944 0.8046132 0.5311557  
0.3794576 0.9652998 1.06476 1.439453302 0.2994955 5.4617390.769969  
0.3076354 0.7571031 0.4837697 1.88323 1.0693941.9013740.1876737  
0.9906194 0.792454719 0.04543843 3.7399327.1602630.244565712 0.7087652  
0.4791732 1.2331690.910760517 1.2829730.3735075 0.7021624 3.293986  
0.9157474 0.5165809 1.40811 1.8126420.08619787 0.9211978 0.158005912  
1.3638590.2915918 1.1581260.1256108 0.6721722 0.4722582 0.26541108  
0.5541913 0.3657287 1.8123311.126359952 2.9626320 1.0748730.1205002  
0.08364333 0.2027071 0.3956183 1.2630511.5429252.8384830.418080209  
8.0595080.509747703 0.1787929 1.1683841.1567260.7238604 0.6515675  
0.9983599 0.7251059 0.08844171 0.9411254 0.3418388 2.039044  
0.7014853 1.0715122.1811732.5532651.4738341.95786 0 0.9303111  
1.35404085 0.3993908 1.8951471.1556890.8971239 0.279412017 1.18058  
0.3780971 0.6232786 0.4787175 0.7751038 0.3081781 0.3123313  
0.4437511 1.6111310.2744774 0.5322899 1.0116348.43291 0.2771155  
0.1211177 0.5138159 0.4731803 0.0409528 0.5288311.162034921 1.53845  
1.9210380.653962499 0.5798162 0.07819009 0.4958655 2.2215190.3701464  
0.6618548 0.519429179 2.4307280.6882288 0.1425507 0.2777028  
0.4012384 0.8111714 0.8593753 0.03808236 1.5706430.499703638



0.4340611 0.3275371 0.9633966 1.5075121.78058 0.4515697 1.903303  
2.2202330.9657894 0.3664473 0.7360437 1.6606990.03958965 0.4768495  
1.0079160.6800132 0.0438146 2.4966680.602858785 1.4916720.7272405  
0.3703007 1.8907320.8806592 0.5379738 0.170905077 0.6639349  
0.4651115 1.2207371.6852530.553277491 0.7744148 0.8158177 0.85246  
1.4184481.7580652.3396711.28102 1.0367080.7001637 0.6393494 2.181837  
0.7603119 0.9088722 0.76676553 0.815489654 1.4897910.828585765  
0.202233498 0.2312856 0.465818454 0.4568664 3.0498362.7997260.284953044  
1.5925460.4295033 1.5342190.616172703 0.5815070.4687434 1.4690081.33205  
0.5510983 0.8342105 1.1506692.6309440.3676158 0.3568168 1.124694  
0.712274785 0.2644735 0.41697863 1.5172331.2834930.7450031 0.2474124  
0.4261442 2.8798370.8907605 0.3076291.5433250.975842086 1.375303  
1.0033382.8455392.3040870.3554721 0.2391774 0.6163037 0.9598689  
1.3960534.8104251.1789490.7195045 0.1350490.07786982 1.511409512  
0.8431663 1.0830810.7663924 0.3556111 2.4860860.6909291 0.2308723  
1.0342110.5232154 0.6595164 1.303649125 1.001908068 1.61958 0.2109533  
0.4259887 2.9322290.3476161 0.7091194 0.5688404 0.03946116  
1.2882410.9372721 0.8658949 0.8755966 0.3648539 3.1717213.121738  
0.2541481 2.0418370.4705188 0.707980936 1.7643680.4388991 2.120468  
0.1772832 0 0.5109382.91793 0.5307641 1.9522090.8696818 1.192723  
0.439862185 0.4551898 1.7045991.46822 0.1743073 0.3136921 1.03840262  
1.3431650.3082194 4.3750340.2441191 0.4810579 0.9102238 0.393619007  
2.5295551.2906030.54085 1.0479210.677151548 0.5340750.1140920.3451218  
0.700016237 0.552979129 0.3584826 0.9948104 0.1984060.6619548  
0.6799098 0.1455474 2.2694710.6459597 0.9307605 0.5006883  
0.4514641 2.6633520.293194146 0 7.9916590.7125435 1.0978050.6597694  
1.9231871.1424790.1192114 1.1814282.1156970.6303984 0.6364697  
4.9472361.5277381.5144080.3727616 0.9514262 0.0510362 2.394484  
1.0377481.4769330.4640027 0 0.1996345 0.1294274 0.5579982  
0.5957133 0.2337486 0.5286453 1.5654162.1326781.0485850.4386947  
0.1694390.4643939 0.9408841 1.5439473.0989690.2008220.2573524  
3.2787510.9723939 1.1518881.8068360.1366302 1.6993280.3897583  
0.347705373 1.19746 0.1127354 1.1059140.05812428 1.0640840.744184547  
0.607101698 0.4130201 0.662302541 1.0961060.4795226 12.130251.559118  
0.5866305 0.8346217 0.8355906 0.1055749 1.1407910.4985097  
2.4236930.35495785 0.3510251.7974010.2210108 0 4.4579390.3346471  
1.2534362.4775950.3517069 1.413654  
AL731567.1 1.1858010.0658808 1.55719 0.068500346 0.135377438 1.4919690  
1.6593420.0566410.05568774 0.5482661 0.218413172 1.5625 1.608048988  
0.235295076 4.4998243.9792580.9239218 0.5694062 4.1618042.517325863  
11.502262.2526940.06977371 2.00177 0.9539293 2.7839255.09715211.35462  
0.400159819 1.1327663.478365734 2.7828770.9282603 2.5937780.383707722  
8.2445684.9439467.1935310.2211019 0 0.6312905 15.3733512.6378  
3.8052797.9901050.08046562 0.8140188 2.4920317.9250850.2242249

4.1286421.31555 1.275879063 5.3598022.4630092.7777830.3305174 3.510205  
5.8212292.2256350.5148933 0.2612881 0.8871851.6288450.643869459  
0.1610999 8.5500081.4103550.529892377 4.1881580.3397773 3.072318  
0.645812003 0.2973021 1.60014 0.6345746 4.7153356.0425463.479877  
3.3282615.0778390.5093510.2721721 0 0.03041194 1.12781 1.247927  
0.8412115 0.3971927 7.2556046.133944956 0.0363863 0.4898548  
15.129632.192486752 3.5649520.1074412 8.82527511.060450 9.662371  
8.5327674.4314444.0845431.1741 0.705849704 28.151291.333950157 1.197371  
0.5753404 1.74677312.897881.7325778.4454560.4536759 0.5226101  
1.4236660.3231931 1.5334961.4319584.4321640.7931538 0.06095949  
0.5515712 1.1815331.0348092.1465621.533553841 1.8880294.14348 0.3594247  
3.5783011.733624558 0.7610349 1.6756583.2737861.5760380 4.079158  
3.4562950.4078924 4.9444251.6219120.5322899 4.0713912.71138312.95965  
4.0556083.0361852.0723781.8875522.1353562.803849412 1.52726113.36965  
0.488125119 0.5938723 0.1848129 3.1742911.7963483.7182890.5866441  
0.789262519 3.0384096.50689 9.1534854.8244555.7851282.6145191.175987  
0.1350193 0.7643235 0.531502961 11.798570.2764923 2.5261790.1303614  
13.391140.7389322 9.5916047.1720261.5490260.2405967 1.9054292.003964  
3.5090820.7684765 2.0365224.8837311.9158937.29301 1.603056315 6.429347  
1.0231741.31288411.578781.8833140.0747985 0.363561709 0.8308063 0  
0.6411952 0.2747121 0.840694369 0.3882741 11.630044.1305561.072863  
3.9858174.1154470.7799047 1.0291684.4683173.2971411.1281092.350055  
12.645341.208236593 0.199398724 2.6762060.40059725 0.09560129 4.601182  
3.79853776 17.502834.9955056.4796681.178669411 5.2569010.6526219  
4.0333731.395724531 2.4435045.3022794.9478850.3590374 0.6512980.1408407  
0.4532937 3.8348 0.7965009 4.67376 2.2469543.507413712 4.922814  
0.313595498 3.8103240.9101134 0.03260956 1.1695860.2238333 10.80396  
7.4859871.13613 9.0183181.647525601 6.9658193.33143 0.1042763 11.42898  
1.26031 3.4727315.46269211.146622.0545698.1756390.7740573 0.1417206  
0.5586116 0.9202797 4.931496254 1.4635640.1828578 2.1408321.500956  
1.1970044.7972462.0918434.7143890.9275183 6.0795421.042222161 0.620228804  
2.02664 2.07757 0.6041294 0.8316868 0.3081142 0.2205395 0.576228  
0.6529029 6.4589510 2.1035120.09701212 0.6302022 6.8720622.712022  
0.5005947 5.7913930.5988422 2.384608517 1.2865890.2829267 0.7518024  
0.05237913 0.2824805 1.1147747.3523840.1393926 14.439616.623637  
2.6269480.831739404 0.8313797 1.1937930.8938753 0.8651979 1.760953  
0.245440619 0.8369807 0.2318014 2.9240040.5193080.4347529 3.496087  
0.54976539 1.3950882.1448948.3946482.3181291.913689158 1.8935390.7415978  
1.9810891.418214714 0.186720225 0.2353674 0.06187816 0.8441275  
7.8719977.0811060.2580159 9.4632660.9754644 0.7464216 12.04962  
3.3494990.6053072 0.654504103 0.1962229 29.1139 4.7718822.731382  
0.8230457 1.8440163.1504720.9509825.6547420.9885188.78335 5.975743  
0.8352476 3.5250421.5588190.4956035 3.6634090.3618936.7628490.443602  
1.0698022.3501431.2990786.1814090.6118386 2.05594 1.6427240 0.234286

7.6177998.6014944.2810022.5922870.08009846 0.3430182 1.5698176.858224  
3.8942161.5822340.6082876 11.491050.4681896 1.7801911.3103291.399424  
12.189890.58624815.409669927 1.4151814.8407893.8276131.3738470.577795  
1.359213098 0.46425424 0.4881147 2.571798177 0.9421079 15.816320  
2.4567921.6386874.0394250.4740078 3.4311855.43632 0.3142122 11.08384  
0.953399183 0.5333757 5.6316030.6268670.5597586 3.9768481.617922  
0.6583702 5.4783181.6106581.883961  
AC006160.1 0.05922595 0.08116515 0.04567757 0.042196213 0 0.09190531  
0.0968328 0.1238976 0.1395634 0.1715182 0.1125773 0.134542514  
0.04010416 0.056603324 0.036235442 0.1593041 0.09308442 0 0.153455  
0.3443737 0.083820148 0.1369157 0.04142267 0.1289418 0 0.1532923  
0.2091339 0.2052187 0.09944709 0.082166149 0.1246043 0.166421227  
0.06949671 0.3378867 0.1331473 0.021487632 0.1074847 0.1186547  
0.6621355 0.06809939 0.03269338 0.3370250.04711435 0.4545920.2305625  
0.05320978 0.1239171 0.09401917 0.08079426 0.04833517 0.1381226  
0.1338549 0.1409355 0.02619805 0.09344258 0.2092708 0.2065138  
0.1832388 0.08479555 0.2241173 0.03808309 0.3171742 0.06438139  
0.2049397 0.1567763 0.144226759 0 0.2231697 0.05791858 0.148369865  
0.2428146 0 0.09705374 0.331516828 0.09156903 0.1699459 0.09020722  
0.2701997 0.1666660.1128213 0.1206005 0.0977484 0 0.0502974 0  
0.05620127 0.0771923 0.07439255 0.3352970.2634915 0.3192466  
0.021468807 0.2241396 0.03550007 0.1965029 0.192938834 0.3529302 0  
0.04118462 0.2924137 0.0811898 0.2705464 0.1800063 0.05746883  
0.08985995 0.1291510.130441025 2.4773140 0.04338708 0.7442604  
0.04678314 0.08107236 0.7708044 0.0765059 0.03105159 0 0.1370279  
0.0746576 0.3036321 0.2785534 0.09000702 0.06107284 0.1126531  
0.1788252 0 0.08314465 0 0.041072572 0.2326052 0.06898335  
0.1549839 0.05442552 0.152558961 0.07813292 0.2408479 0.1512489  
0.02489331 0 0.3140952 0.1860359 0.3230508 0.1135068 0.08563695  
0.2086577 0.01990458 4.2883830.02882001 0.1175649 0.20781 0.1013163  
0 0.09624725 0.035248393 0.08959931 0.03107812 0.150342537 0.3376849  
0.2846119 0.2105776 0.02837309 0.1684166 0 0.054020635 0.1020906  
0.03340204 0.06918462 0.4043353 0.05842031 0.2147392 0.1536623 0  
0.2914620.436541098 0.2764969 0.06812771 0.1972555 0.1070701  
0.2946051 0.0758637 0.3137218 0.1795922 0.1255526 0.2074906  
0.1275809 0.1908930.1152851 0 0.04733953 0 0.06379405 0.3772323  
0.109720299 0.1596967 0.2016880 0.2252378 0.1221181 0.1382276  
0.174186455 0.2558883 0.1231277 0.1184929 0.08461133 0.345245154  
0.0854203 0.1855985 0.4964727 0.08261042 0.1044793 0.2376671  
0.05652015 0.04528341 0.1699064 0.04231331 0.1323648 0.2341761  
0.1503770.093034218 0.286602433 0.8242713 0.137093281 0.235561579  
0.08418797 0.033911583 0.02771656 0.1168569 0.1061563 0.276594422  
0.1599136 0.06700251 0.2279411 0.074762288 0.09407491 0.09749862  
0.2673594 1.0037580.1203599 0.2313544 0.3909205 0.2340955 0

|             |             |             |             |             |             |
|-------------|-------------|-------------|-------------|-------------|-------------|
| 0.06494066  | 0.1364629   | 0.086422674 | 0.3850734   | 0.027596404 | 0.2958604   |
| 0.3924409   | 0.08034996  | 0           | 0.2757626   | 0.1218908   | 0.07205262  |
| 0.2496757   | 0.152231365 | 0.1668701   | 0.2086943   | 0.1445269   | 0.378       |
| 0.1176289   | 0.22387     | 0.3204779   | 0.06076388  | 0.1150559   | 0.3335228   |
| 0.03178795  | 0.2036997   | 0           | 0.02834461  | 0.095678793 | 0.01918203  |
| 0.1521637   | 0.01849178  | 0.4021934   | 0           | 0.1400625   | 0.2366274   |
| 0.3520938   | 0.16748057  | 0.104198439 | 0.1618310   | 0.2047653   | 0.06202395  |
| 0.4838569   | 0.06326612  | 0.0815114   | 0.2662173   | 0.02872773  | 0.2557745   |
| 0.7354334   | 0.09959911  | 0.2451818   | 0.3848355   | 0.1053535   | 0           |
| 0.1317453   | 0.103082024 | 0.2186314   | 0.6099899   | 0.09648131  | 0.06453109  |
| 0.2575128   | 0.5210433   | 0           | 0.3920574   | 0.0351738   | 0.4144171   |
| 0.09037586  | 0.5055714   | 0.2267288   | 0.4060662   | 0.1427299   | 0.170090349 |
| 0.03555725  | 0.04079705  | 0.3514510   | 0.1421750   | 0.0824024   | 0.1242456   |
| 0.1473213   | 0.4991406   | 0.3937388   | 0.07824479  | 0.214333186 | 0.08640146  |
| 0.1245884   | 0           | 0.691616042 | 0.143774574 | 0.08699179  | 0.1334093   |
| 0.1204758   | 0.1237436   | 0.05297926  | 0.1246924   | 0.05225097  | 0.07259932  |
| 0.1656823   | 0.01825922  | 0.0497159   | 0.118580743 | 0.09065498  | 1.120885    |
| 0.1383284   | 0.1051582   | 0.08005202  | 0.2641661   | 0.3604140   | 0.04339296  |
| 0.1720159   | 0.07163848  | 0.04830842  | 0.07722499  | 0.1978894   | 0.0529616   |
| 0.07112835  | 0.1187246   | 0.1117159   | 0.03715435  | 0.3840914   | 0.2250367   |
| 0.1387364   | 0.07238442  | 0           | 0.02906678  | 0.2826695   | 0.09558181  |
| 0.06806758  | 0.7216009   | 0.06703663  | 0.1971542   | 0.06939729  | 0.2129132   |
| 0.02467032  | 0.02112992  | 0.2417519   | 0.2713088   | 0           | 0.1949312   |
| 0.08230796  | 0.1310931   | 0.06450575  | 0.3587391   | 0.3315559   | 0.1150801   |
| 0.1031797   | 0.295317763 | 0.07748899  | 0.05471424  | 0.2012764   | 0           |
| 0.197005946 | 0.207985899 | 0           | 0.172198661 | 0.07254231  | 0.1586784   |
| 0.1547779   | 0.09706068  | 0.05786711  | 0.1703268   | 0.03842927  | 0.05358037  |
| 0.04838867  | 0.1790020   | 0.023491756 | 0           | 0.1825825   | 0.1608959   |
| 0.2512552   | 0.8416071   | 0.1216668   | 0.1163670   | 0.03200533  | 0.0437932   |
| GATA6-AS1   | 0.4385904   | 1.6195190   | 0.4322206   | 1.024236116 | 0.205850937 |
|             | 1.4208871   | 1.1851151   | 1.1052921   | 1.2419310   | 0.2470155   |
|             |             |             |             | 0.595035117 | 0.5197262   |
| 0.74518913  | 1.520576678 | 0.4587749   | 0.4084889   | 0.2965875   | 0.08117084  |
| 0.7398777   | 0.103453282 | 0.01408212  | 0.02556254  | 0.05304792  | 0.02205676  |
| 0.1786868   | 0.05162384  | 0.2617298   | 0.05455134  | 0.123947839 | 0.6869298   |
| 0.136934635 | 0.01906108  | 0.1390099   | 0.1917233   | 0.017680444 | 0.1105507   |
| 0.1464471   | 0.1047727   | 0.3642178   | 0.1076030   | 0.0106658   | 0.05814991  |
| 0.3156023   | 0.03161855  | 0.04378205  | 0.2345112   | 0.05157387  | 0           |
| 0.1704749   | 0.1376730   | 0.01449556  | 0.032334401 | 0           | 0.01076201  |
| 0.0167525   | 0.04360714  | 0.7508044   | 0.01566776  | 0.09490079  | 0           |
| 0.01289986  | 0.044502223 | 0.2177455   | 0.01836284  | 0.01191413  | 1.171983578 |
| 0.1123833   | 0.02870308  | 0.02994664  | 0.06819463  | 0.4445343   | 0.3216201   |
| 0.06185355  | 0.08337209  | 0.1371361   | 0.04641577  | 0.1116365   | 0.08042929  |
| 0.07745042  | 0           | 0           | 0.02312175  | 0.3810920   | 0.0510097   |
| 0.05051583  | 0.114822201 | 0.1198772   | 0.007302537 | 0.2425296   | 0.09922115  |

|             |             |             |             |             |             |
|-------------|-------------|-------------|-------------|-------------|-------------|
| 0.04839965  | 0.02722865  | 0.1524938   | 0.1082717   | 0.01670114  | 0.1720175   |
| 0.08886763  | 0.01182162  | 0.009242315 | 0.08501434  | 0.089441186 | 0.1341041   |
| 0.806984021 | 0.1070992   | 0           | 0.2694586   | 0.01667698  | 0.1057055   |
| 0.01573764  | 0.05109972  | 0           | 0.01127492  | 0.2559572   | 0.04163908  |
| 0.0572998   | 0.03702977  | 0.08794087  | 0.08496877  | 0.03678521  | 0.1122877   |
| 0.4218804   | 0.7960973   | 0.304157832 | 0.07177204  | 0.2081231   | 0.1548503   |
| 0.1903251   | 0.481192554 | 0.06428929  | 0.2264849   | 0.1866759   | 0.1228962   |
| 0.02443668  | 0.3138244   | 0.2381151   | 0.1033715   | 0.007782967 | 0           |
| 0.0122634   | 0.0655115   | 0.01857139  | 0           | 0.04836736  | 0.2564852   |
| 0.0083365   | 0.06132811  | 0.1583882   | 0.014501533 | 0.01843101  | 0.1662160   |
| 0.123704775 | 0.1505041   | 0.6088790   | 0.4579208   | 0.3852079   | 0.0277153   |
| 0.3469020   | 0.033336925 | 0.01400035  | 0.02748385  | 0.07115807  | 0.04990425  |
| 0.6729712   | 0.3202535   | 0.1761078   | 0.2851476   | 0.2674923   | 0.014966439 |
| 0.09750303  | 0.5045113   | 0.0901698   | 0           | 0.1050430   | 0.135248    |
| 0.06453411  | 0.05910879  | 0.3822365   | 0.06097404  | 0.3884114   | 1.010487    |
| 0.1067161   | 0           | 0.4674226   | 0.04700037  | 0.01312275  | 0.08465295  |
| 0.033855002 | 0.1445417   | 0.09334848  | 0.1940880   | 0.09266501  | 0.4019245   |
| 0.07582426  | 0.020474859 | 0.1169722   | 1.1904140   | 0.008124854 | 0           |
| 1.633428116 | 0.1124568   | 0.5344993   | 0.0893610   | 0.01074595  | 0.08148213  |
| 0.1046382   | 0           | 0.489308    | 0.4700189   | 0           | 0.3328189   |
| 0.0742399   | 0.019137593 | 0.008422217 | 0.0535442   | 0.045121212 | 0.181710625 |
| 0.4502648   | 0.111612452 | 0.01140286  | 0.9775465   | 0           | 0.071121029 |
| 0.08223754  | 0.01837699  | 0.009377719 | 0.046136903 | 0.1935167   | 0           |
| 0.1979897   | 0.06999253  | 0.08252871  | 0.2974420   | 0.1608285   | 0.6741644   |
| 1.6698990   | 0.03562296  | 0.1684265   | 0.142220527 | 0.05940861  | 0.06812058  |
| 0.1379492   | 0.2383369   | 0.00826419  | 0.2223047   | 0.5388944   | 0.07020588  |
| 0.07410788  | 0.7831630   | 0.334023841 | 0.6865197   | 0.02861963  | 0.08588634  |
| 0.009719556 | 0.2322898   | 0           | 0.1186630   | 0.0499977   | 0.2682323   |
| 0.06860726  | 0.07846725  | 0.1316921   | 0.2224641   | 0.05830626  | 0.03936319  |
| 0.1025918   | 0.3012189   | 0.06260165  | 0.05325388  | 1.2272080   | 0.04609848  |
| 0.01770015  | 0.2481183   | 0.02633724  | 0.045935428 | 0.042868255 | 0.1236464   |
| 0.1263637   | 1.2886220   | 0.2107731   | 0.0520566   | 0.2794549   | 0.3468273   |
| 0.0709132   | 0.1286121   | 0           | 0.2881566   | 0.0901473   | 0.1681170   |
| 0.09047147  | 0.006191922 | 0.2029839   | 0.06115431  | 0.1951247   | 0.180238043 |
| 0.1349207   | 0.09560221  | 0.3413628   | 0.02654872  | 0.01431772  | 0.1883436   |
| 0.04946822  | 0           | 0.0705671   | 0.01447084  | 0.04871293  | 0.043913833 |
| 0.9915070   | 0.03781764  | 0.1732314   | 0.06264736  | 0.1056969   | 0.108852847 |
| 0.1097145   | 0.0167843   | 0.0271107   | 0.2193457   | 0.08475288  | 0           |
| 0.107173978 | 0.4040628   | 0.1570334   | 0.4751648   | 0.1207150   | 0.079360889 |
| 0.05331961  | 0.5638259   | 0.5168308   | 0.104829639 | 0.153790685 | 0.02982439  |
| 0           | 0.2020411   | 0.04956491  | 0.05090932  | 0.08718475  | 0.07694953  |
| 0.07523795  | 0.1692524   | 0.2999186   | 0           | 0.0102268   | 0.702507969 |
| 0           | 0.1537144   | 0.1991838   | 0.04326311  | 0.1097806   | 0.2390971   |
| 0.2281198   | 0.05355686  | 0.0353845   | 0.01473639  | 0.04968639  | 0           |
| 0.02442409  | 0           | 0.1463145   | 0.04884445  | 0.06434539  | 0           |
| 0.03646591  | 0.006613021 | 0.2140406   | 0.04963276  | 0.02862811  | 0           |
| 0.1550573   | 0.01966165  | 0.04460497  | 0.1820238   | 0.01979158  | 0.06435223  |
| 0.2129168   | 0.02855072  | 0.06131619  | 0.01014961  |             |             |

|              |             |             |             |             |             |             |             |
|--------------|-------------|-------------|-------------|-------------|-------------|-------------|-------------|
| 0.09562362   | 1.7902640   | 0.01594559  | 0.01174887  | 0.01002458  | 0.07707868  |             |             |
| 0.02257487   | 0           | 0.1238454   | 0.03689719  | 0.5183403   | 0.02367253  | 0.1167351   |             |
| 0.156209929  | 0.1673686   | 0.1012949   | 0.04731833  | 0.05222577  | 0.1378162   |             |             |
| 0.010131271  | 0.246006361 | 0.1855532   | 0.056675368 | 0.02984461  | 0           | 0           |             |
| 0.02122571   | 0.03993171  | 0.1309390   | 0.2302435   | 0.3003934   | 0.03306523  |             |             |
| 0.1692144    | 0           | 0.048323689 | 0.2553259   | 0           | 0.05295531  | 0.2305204   |             |
| 0.0861407    | 0.2277930   | 0.4338093   | 0.0359059   | 0.3950191   | 0.2252119   |             |             |
| MIR1-1HG-AS1 | 0.5797065   | 8.6911460   | 0.05546658  | 5.533827799 | 0.147293203 |             |             |
| 0.4666961    | 3.4847835   | 9.9359233   | 8.901714    | 1.1427941   | 1.2676131   | 1.151057349 | 2.470355    |
| 2.161990384  | 3.096066215 | 0.3868881   | 0.5685904   | 0.1842948   | 0.2371618   |             |             |
| 0.01689597   | 0.018506067 | 0.01511434  | 0.004572712 | 0           | 0.01183676  | 0.2369104   |             |
| 0.01385197   | 0.1540499   | 0.007318744 | 0.006046964 | 1.1664460   | 0.101043209 |             |             |
| 0.09206217   | 0.05164592  | 0.09553916  | 0.056929259 | 0.4093564   | 0.05239389  |             |             |
| 0.07871678   | 0.7066540   | 0.02165443  | 0.1259236   | 0.06241229  | 0.6021972   |             |             |
| 0.008484048  | 0.01762173  | 0.0766046   | 0.01383856  | 0.004459501 | 0.08537269  |             |             |
| 0.01829707   | 0.007388223 | 0.03111617  | 0.028920426 | 0.03438423  | 0.01732629  |             |             |
| 0.01302707   | 0           | 0.009360709 | 1.25117     | 0.008408101 | 0.05729457  | 0           | 0.07541203  |
| 0.01384542   | 0.031842823 | 0.05112324  | 0           | 0           | 0.432399667 | 0.02010351  |             |
| 0.01540351   | 0           | 0.007319329 | 2.4462440   | 0.02251271  | 0.1062199   | 0.01491388  |             |
| 0.4722286    | 0.01660602  | 0.2329823   | 0.04316238  | 0.4294922   | 0.05182246  |             |             |
| 0.008465433  | 0.08685801  | 0.04686757  | 0.04927384  | 0.06056827  | 0.2243872   |             |             |
| 0.005421864  | 0.066359281 | 0.004948622 | 0.007837813 | 0.006197787 | 0.010649406 |             |             |
| 0.05194734   | 0.4018369   | 0.05455719  | 0.0258240   | 0.0134440   | 0.005430187 | 0.07153622  |             |
| 0.01903222   | 0           | 0.02281147  | 0.057598333 | 0           | 0.046818158 | 0.03831653  | 0           |
| 0.6094065    | 0.008949701 | 0.008727207 | 0           | 0.03427833  | 0           | 0           | 0.02747189  |
| 0.02234561   | 0.04099992  | 0           | 0.07416117  | 0           | 0.007896314 | 0.2477323   | 0           |
| 3.2611550    | 1.90430679  | 0.02139804  | 0.2081482   | 0.01466478  | 0.5287142   |             |             |
| 0.112274773  | 0.01725042  | 0.1975076   | 0.1669660   | 0.02198408  | 0           | 0.04953349  |             |
| 0.009127461  | 0           | 0.01670692  | 0.03781437  | 0           | 0.004394593 | 0.04983169  |             |
| 0.006362969  | 0.03893451  | 0.1101142   | 0.03131648  | 0.01974704  | 0.1487483   |             |             |
| 0.007782247  | 0.03956402  | 0.1921226   | 0.022128722 | 0.07455511  | 0.02513499  |             |             |
| 0.01992512   | 0.7705085   | 0.05949365  | 0.1329750   | 0.059634201 | 0           | 0           | 0.007637396 |
| 0            | 0.01289821  | 0.2666856   | 0.04361919  | 0.01224196  | 0.6335988   | 0.032126957 |             |
| 0.06976667   | 0           | 0.004838962 | 0.02363927  | 0.01300876  | 0.1563279   | 0.01154408  |             |
| 0.03965091   | 0.6153816   | 0.04581041  | 0.4056149   | 3.5093520   | 0.08908545  |             |             |
| 0.006967641  | 0.5173623   | 0.008407582 | 0           | 0           | 0.006056095 | 0.3948932   |             |
| 0.03896314   | 0.1264767   | 0.01105082  | 0.4313856   | 0.1169869   | 0.027469583 |             |             |
| 0.01255462   | 0.1223303   | 0.008720406 | 0.04670187  | 2.655145615 | 0.04149058  |             |             |
| 0.2868391    | 0.1575683   | 0.01823898  | 0.02306725  | 0.004372738 | 0.02495738  |             |             |
| 0.003332603  | 0           | 0.3456563   | 0           | 0.01880077  | 0.0332007   | 0           | 0.009039565 |
| 0.1819851    | 0.006053574 | 0.039006002 | 0.9169723   | 0           | 0.006119347 | 2.1500010   |             |
| 0.022900259  | 0.1059187   | 0.1923092   | 0           | 0.041265614 | 0.1973164   | 0           |             |
| 0.2951421    | 0           | 0           | 0.02553956  | 0.09863842  | 0.004698575 | 0.009847818 |             |
| 0.004779266  | 0.2496378   | 0.050881763 | 0.02125442  | 0.182784541 | 1.720119    |             |             |

|                    |                     |                   |                   |                    |             |             |
|--------------------|---------------------|-------------------|-------------------|--------------------|-------------|-------------|
| 0.6766507          | 0.008869955         | 0.03976661        | 0                 | 0.005382284        | 0.8351699   | 0.5500781   |
| 0.02067156         | 0.711413873         | 0.1105262         | 0.007679362       | 0.04963636         | 0.005216    |             |
| 0.05194095         | 0.01647557          | 0.2901            | 0                 | 0.06350597         | 0.01472723  | 0           |
| 0.0759725          | 0.03129005          | 0                 | 0.004235068       | 0.03730364         | 0.05599195  | 0.01633068  |
| 0.02959916         | 0                   | 0.01236937        | 0                 | 0.02803215         | 0.06360247  | 0.012325623 |
| 0.046010497        | 0.2347941           | 0.01130218        | 3.1085010.3204822 | 0.04888831         |             |             |
| 0.5878803          | 0.04244953          | 0.02537038        | 0.03137259        | 0.06276991         | 0.1701032   | 0           |
| 0.08570898         | 0.5462046           | 0.003322895       | 0.05446565        | 0.02813011         | 0.005817425 |             |
| 0.085345362        | 0.0663714           | 0.01923935        | 0.4856728         | 0.007123686        | 0.06915242  |             |
| 0.1326604          | 0.00884904          | 0                 | 0.01081995        | 0.03882889         | 0           | 0.028279629 |
| 3.6980410.04058967 | 0.04290676          | 0.2521478         | 0.02520987        | 0.154384823        |             |             |
| 0.08635481         | 0.009007296         | 0.04849652        | 0.02354237        | 0.06822394         | 0.02743131  |             |
| 0.069017896        | 0.09215713          | 0.1944737         | 0.01159078        | 0.01295634         | 0.018928453 |             |
| 0.01907598         | 0.04584502          | 0.3328287         | 0                 | 0.044440183        | 0.003201052 | 0.008415575 |
| 0.03188981         | 0.08644678          | 0.01366024        | 0.05848462        | 0.006882494        | 0.02307225  |             |
| 0.06945769         | 0.01463194          | 0.08465783        | 0                 | 0.12043084         | 0           | 0.08249081  |
| 0.03817572         | 0.1810938           | 0.3181343         | 0.2974493         | 0                  | 0.004790215 | 0.02848364  |
| 0.01581656         | 0.07999261          | 0.02273329        | 0                 | 0.03507907         | 0.1256315   | 0           |
| 0.2515827          | 0.0164061           | 0                 | 0.02839102        | 0.05360362         | 0.005327084 | 0           |
| 0.006934291        | 0.03165427          | 0.007979085       | 0.05259859        | 0.03186345         | 0           | 0.01632312  |
| 0                  | 0                   | 0.005446789       | 0.009330257       | 3.6917510.04278599 | 0           | 0.03227813  |
| 0.09100139         | 0                   | 0                 | 0.1186815         | 0.05940263         | 0.01464038  | 0.03175966  |
| 0.06264588         | 0.083830056         | 0.0598789         | 0.03019994        | 0                  | 0.02802696  | 0.4714889   |
| 0.005436947        | 0                   | 0.01991542        | 0.007603709       | 0                  | 0           | 0.2809725   |
| 0.03194019         | 0.2363760.4581647   | 0.008872228       | 0.2243514         | 0                  | 0.020746325 |             |
| 0.09672047         | 0.04031112          | 0.01420923        | 0                 | 0.2172688          | 0.04889805  | 0           |
| 0.0385378          | 0.7419546           | 0.05801277        |                   |                    |             |             |
| AP001001.1         | 0.04749475          | 0                 | 0.05494495        | 0.025378637        | 0.025077938 | 0.1105517   |
| 0.05823945         | 0.1304054           | 0.02098488        | 0.04126341        | 0.2708356          | 0.141609503 |             |
| 0.1326621          | 0.051065549         | 0.065380709       | 0.1341374         | 0.05598501         | 0.0228202   | 0           |
| 0.2991752          | 0.10082616          | 0.1029338         | 0.1619371         | 0.05170081         | 0.3869396   |             |
| 0.3073222          | 0.4025031           | 0.3826250.1395609 | 0.082363823       | 0.1199079          |             |             |
| 0.212697538        | 0.1114622           | 0.2032198         | 0.06006043        | 0.103388769        | 0.3070685   |             |
| 0.1903042          | 0.1838017           | 0.04095793        | 0.03932644        | 0.1403318          | 0.2550295   |             |
| 0.5980874          | 0.06933515          | 0.2880241         | 0.01490582        | 0.05654721         | 0.1336313   |             |
| 0.2616378          | 0.1329167           | 0.2113287         | 0.04238237        | 0.094539876        | 0.1686013   |             |
| 0.1887969          | 0.1596939           | 0.06122656        | 0.1657491         | 0.1540502          | 0.3206676   |             |
| 0.2254464          | 0.2710524           | 0.04108655        | 0.03771683        | 0.130116362        | 0.07958101  |             |
| 0.4563615          | 0.1741737           | 0.035694434       | 0.2190589         | 0.1258838          | 0.1459308   |             |
| 0.119633178        | 0.1652208           | 0.1839832         | 0.3255272         | 0.1421961          | 0.7350948   | 0           |
| 0.3989391          | 0.4115310.0188709   | 0.1008368         | 0                 | 0.03380189         | 0.0464268   |             |
| 0.1342287          | 0.09166463          | 0.07923762        | 0.02953981        | 0.116210465        | 0.01348073  |             |
| 0.09608077         | 0.1350690.290104502 | 0.1415117         | 0.05970869        | 0.07431066         |             |             |
| 0.3165666          | 0.04883107          | 0.1479258         | 0.2165272         | 0.2592319          | 0.1216028   |             |

|             |             |             |             |             |             |             |
|-------------|-------------|-------------|-------------|-------------|-------------|-------------|
| 0.0932124   | 0.169981288 | 2.7446710   | 0.06376956  | 0.05218975  | 0.4902620   | 0.1406871   |
| 0.1462813   | 0.3090635   | 0.1610489   | 0.1494062   | 0           | 0.08241451  | 0.1796093   |
| 0.3855260   | 0.08376707  | 0.1082683   | 0.5877098   | 0.3952346   | 0.08604259  |             |
| 0.1276757   | 0.08334468  | 0.1939702   | 0.148216982 | 0.04663296  | 0.4840452   |             |
| 0.06658148  | 0.08183468  | 0.18351118  | 0.06265671  | 0.0620813   | 0.2425805   |             |
| 0.02994384  | 0.0178621   | 0.2158977   | 0.1864835   | 0.0647656   | 0.2730717   |             |
| 0.1201802   | 0.01792797  | 0.02394296  | 2.4977710   | 0.08666803  | 0.2298031   |             |
| 0.1249860   | 0.1218720   | 0.07172487  | 0.03859152  | 0.31799873  | 0.1886112   | 0.1121504   |
| 0.180845072 | 0.06769947  | 0.06847119  | 0.2894869   | 0.1706481   | 0.04051723  |             |
| 0.2535695   | 0.146206609 | 0.1228034   | 0.04017887  | 0.1456372   | 0.2431848   |             |
| 0.3513651   | 0.1775860   | 0.1980412   | 0.1000463   | 0.09439119  | 0.218795659 |             |
| 0.3325946   | 0.2253623   | 0.1713660   | 0.08049579  | 0.1771883   | 0.07604621  |             |
| 0.1572383   | 0.02160291  | 0.03020512  | 0.1069662   | 0.07673271  | 0.09184909  |             |
| 0.3986903   | 0.2277698   | 0.1423602   | 0.2977444   | 0.03836852  | 0.5568969   |             |
| 0.115483474 | 0.4418232   | 0.1213039   | 0.02026706  | 0.2107276   | 0.05508534  |             |
| 0.1662722   | 0           | 0.08550131  | 0.1295951   | 0.1662891   | 0.1526668   | 0.034607574 |
| 0.1541264   | 0.06697622  | 0.1306376   | 0.07452824  | 0.1413864   | 0.1191194   |             |
| 0.1019810   | 0.1180201   | 0.2861294   | 0.1781434   | 0.4179522   | 0.07682382  |             |
| 0.1627979   | 0.139887055 | 0.098500092 | 0.1826457   | 0.263852345 | 0.070838486 |             |
| 0.0337562   | 0.061187701 | 0.4000787   | 0.2108484   | 0.1660022   | 0.083177954 |             |
| 0.6251635   | 1.2358120   | 0.3427342   | 0.292274381 | 0.1980326   | 0.2931995   |             |
| 0.2572825   | 0.1739486   | 0.2171690   | 0.1217533   | 0           | 0.2815905   | 0           |
| 0.2579492   | 0.294543997 | 0.1447499   | 0.132781414 | 0.2609835   | 0.078677    |             |
| 0.06040745  | 0.06499783  | 0.04146391  | 0.2492554   | 0.2816813   | 0.05051085  |             |
| 0.1689365   | 0.06103904  | 0.2150634   | 0.3347143   | 0.2221410   | 0.2841821   |             |
| 0.2122415   | 0.1047240   | 0.1734744   | 0.2375492   | 0.1268659   | 0.2808331   |             |
| 0.07647463  | 0.2275257   | 0.02956565  | 0.06819073  | 0.604226543 | 0.05768454  |             |
| 0.2709874   | 0.04575894  | 0.04448703  | 0.2015805   | 0.03781548  | 0.2190232   |             |
| 0.06469001  | 0.4963624   | 0.2695185   | 0.285401933 | 0.250677881 | 0.1807598   |             |
| 0.1231548   | 0.1865195   | 0.4621964   | 0.07610199  | 0.1634150   | 0.06226681  |             |
| 0.05183431  | 0.4102237   | 0           | 0.1895664   | 0.1557484   | 0.2580603   | 0.2645221   |
| 0.1086243   | 0.09273246  | 0.2043475   | 0.0475424   | 0.092997015 | 0.3451729   |             |
| 0.1397617   | 0.08123928  | 0.05821771  | 0.02093119  | 0.1548794   | 0.3374841   |             |
| 0.05164345  | 0.2505379   | 0.2961707   | 0.4866279   | 0.218273232 | 0.01811866  |             |
| 0.1105719   | 0.09740327  | 0.06105647  | 0.08584397  | 0.250066004 | 0.2245496   |             |
| 0.1472227   | 0.2245890   | 0.1115109   | 0.02490889  | 0.062671423 | 0.1624433   |             |
| 0.6180688   | 0.03157488  | 0.1058846   | 0.232036729 | 0.2858108   | 0           | 0.06476223  |
| 0.153251349 | 0.069177822 | 0.07848096  | 0.4699663   | 0.0347489   | 0.3622968   |             |
| 0.3535177   | 0.03186403  | 0.1499909   | 0.1414170   | 0.1601027   | 0.1594377   |             |
| 0.2635653   | 0.2541611   | 0.05705569  | 0.03634923  | 2.34347     | 0.1247951   |             |
| 0.1517921   | 0.1604892   | 0.1906572   | 0.3001412   | 0.1696397   | 0.284509    |             |
| 0.08617299  | 0.2324383   | 0.09289293  | 0.4403714   | 0.1274136   | 0.06416952  |             |
| 0.06120525  | 0.2418868   | 0.04469249  | 0.6930278   | 0.09667632  | 0.2503262   |             |
| 0.1160937   | 0.02092584  | 0.1223742   | 0.09444983  | 0.1293459   | 0.3043058   |             |



|             |             |                    |                    |             |                   |
|-------------|-------------|--------------------|--------------------|-------------|-------------------|
| 0.0614082   | 0.1446674   | 0.2284729          | 0.2371543          | 0.06260782  | 0.268916          |
| 0.02967561  | 0.08895918  | 0.1211667          | 0.4662198          | 0.1889335   | 0.1025851         |
| 0.0225364   | 0.3960287   | 0.1261521          | 0.2198472          | 0.1798011   | 0.1994121         |
| 0.3114637   | 0.1085993   | 0.101495393        | 0.0932105          | 0.09872257  | 0.2075252         |
| 0.1272488   | 0.05036865  | 0.236975877        | 0.07818235         | 0.01808412  | 0.082854207       |
| 0.1090752   | 0.3244827   | 0                  | 0.2068670.1634542  | 0.05220569  | 0.1170765         |
| 0.02311303  | 0.1208459   | 0.02910305         | 0.09227964         | 0.042386889 | 0.1097833         |
| 0.8602023   | 0.01935395  | 0.02592306         | 0.3274175          | 0.1465255   | 0.1097636         |
| 0.4024321   | 0.09624698  | 0.6321392          |                    |             |                   |
| AC090825.1  | 0.1720351   | 0.8723210.09287655 | 0.514787266        | 0.096892914 | 0.3737435         |
| 0.3375272   | 0.1799442   | 0.5675507          | 0.8967839          | 0.1526029   | 0.156323603       |
| 0.3261764   | 0.44392615  | 0.589422366        | 0.1665845          | 0.1982821   | 0.1763395         |
| 0.1273556   | 0           | 0.12173724         | 0.1988513          | 0.01203215  | 0                 |
| 0.08905439  | 0.2186915   | 0.1311428          | 0.1925776          | 0.111379366 | 0.6225388         |
| 0.072511185 | 0.02691584  | 0.01509951         | 0.1160269          | 0.062415663 | 0.1092748         |
| 0.1148864   | 0.1479478   | 0.0791240.05697917 | 0.2259150.1094834  |             | 0.3631278         |
| 0.02232402  | 0.04636794  | 0.4751274          | 0.01820665         | 0           | 0.02808008        |
| 0.03888117  | 0.08187577  | 0.182635516        | 0.0904750.07598428 | 0.03427805  | 0                 |
| 0.07389232  | 0.1115999   | 0                  | 0.2512647          | 0.03740205  | 0.1190587         |
| 0.251363445 | 0.1345203   | 0.01296493         | 0.1009425          | 0.103433678 | 0.03526549        |
| 0.1127658   | 0.115555827 | 0.2766222          | 0.07898339         | 0.08734238  | 0                 |
| 0           | 0.0525467   | 0                  | 0.1458220.04870004 | 0.378675672 | 0.06529969        |
| 0.01440599  | 0           | 0.02186772         | 0.04279955         | 0.037416589 | 0                 |
| 0.0163082   | 0.252195416 | 0.06834435         | 0.2306948          | 0.11963     | 0                 |
| 0.1857494   | 0.06274426  | 0.06677246         | 0                  | 0.1050414   | 0.164187968       |
| 0.153990398 | 0.07561652  | 0.02058925         | 0.3261412          | 0.02354929  | 0                 |
| 0.1262749   | 0           | 0.06368452         | 0.1879452          | 0.07839714  | 0.02697071        |
| 0           | 0.06544528  | 0.02077752         | 0.07047097         | 0           | 0.4496624         |
| 0.2137362   | 0.09003713  | 0.07904558         | 0.354513465        | 0.09078186  | 0.1199309         |
| 0.0292891   | 0.04338493  | 0                  | 0.02606743         | 0.02401703  | 0.1668220.0329706 |
| 0.0331669   | 0.1039017   | 0.1040712          | 0.8916283          | 0.03348568  | 0                 |
| 0           | 0.01732008  | 0.1863812          | 0                  | 0.0780784   | 0.07221872        |
| 0.09808819  | 0.09920632  | 0.06990514         | 0.08241602         | 0.07827263  | 0.06997923        |
| 0.078457544 | 0           | 0                  | 0                  | 0.08484746  | 0.2806912         |
| 0.190204778 | 0.09178829  | 0.1781031          | 0.08912911         | 0.03110093  | 0.06845975        |
| 0.08814528  | 0.01518793  | 0.02086664         | 0.3355202          | 0.01722009  | 0.1630585         |
| 0.5323121   | 0.06697428  | 0                  | 0.2750166          | 0           | 0.01853042        |
| 0.14844     | 0.05858483  | 0.1370342          | 0.01453897         | 0.6562309   | 0.1739891         |
| 0.130104965 | 0.1321396   | 0.0178826          | 0.03441892         | 0.02457727  | 0.401136895       |
| 0.1687233   | 0.1940806   | 0.2703969          | 0                  | 0           | 0                 |
| 0.1229085   | 0.01922416  | 0.1484110          | 0.351310465        | 0.083250126 | 0.1512178         |
| 0.095572388 | 0.051318121 | 0.0815143          | 0.03940153         | 0.0161018   | 0.1357748         |
| 0.02466838  | 0.200857684 | 0                  | 0.0518997          | 0.01324212  | 0.065149166       |
| 0.02832067  | 0.8542661   | 0.16802            | 0.02330749         | 0           | 0.09732999        |
|             |             |                    |                    |             | 0.01236333        |

|             |             |             |             |             |             |             |
|-------------|-------------|-------------|-------------|-------------|-------------|-------------|
| 0.2850375   | 0           | 0.1698803   | 0.083678034 | 0.02796331  | 0.064127972 | 0.5041773   |
| 0.2931256   | 0.07001836  | 0.02092752  | 0.04005073  | 0.01416237  | 0.04185861  |             |
| 0.1626311   | 0.01813098  | 0.545367982 | 0.04154671  | 0.06061997  | 0.02798739  |             |
| 0.2333220   | 0.02733438  | 0.01445069  | 0.07447202  | 0.03530047  | 0.3676263   |             |
| 0.1162550   | 0.03693411  | 0.08452738  | 0.14279     | 0.08233331  | 0.027792059 | 0.04457483  |
| 0.1308758   | 0.1915306   | 0.04297082  | 0.03894204  | 0           | 0.0650949   | 0           |
| 0.09220102  | 0.07438079  | 0.129729334 | 0.020177854 | 0.05372279  | 0.02973935  |             |
| 0.2702438   | 0.09920973  | 0.01837707  | 0.06313819  | 0.1288814   | 0           | 0.0990606   |
| 0           | 0.2237957   | 0.1157232   | 0.1068279   | 0.7345814   | 0.008743512 | 0.1970583   |
| 0.02467286  | 0.09184411  | 0.089827481 | 0.06350642  | 0.06749916  | 0.325092    |             |
| 0.03748902  | 0.1617425   | 0.1496008   | 0.2794131   | 0.1247083   | 0.08541142  | 0           |
| 0.02292891  | 0           | 0.2975193   | 0           | 0.5268679   | 0.1326950   | 0.04975094  |
| 0.197626277 | 0.4647781   | 0.2725597   | 0.02552171  | 0.1238938   | 0.08377471  | 0           |
| 0.060535449 | 0.08558558  | 0.1705725   | 0.04574812  | 0.2727355   | 0           | 0           |
| 0.04825268  | 0.12511     | 0.46523155  | 0           | 0.04211454  | 0.06643154  | 0.1678229   |
| 0.01749745  | 0.03594411  | 0           | 0.03621973  | 0.01517747  | 0.3233509   | 0.05775138  |
| 0.0636456   | 0.0144411   | 0.055111112 | 0.01755519  | 0.1550411   | 0.1406321   | 0.04887291  |
| 0.0775097   | 0.1227728   | 0.01610621  | 0.1008357   | 0.07494882  | 0           | 0           |
| 0.1034666   | 0.1538389   | 0.06198249  | 0.05911924  | 0.05192061  | 0.02158464  | 0.2403003   |
| 0           | 0.1813460   | 0.01401712  | 0.04042529  | 0.0168862   | 0.05473847  | 0.05552778  |
| 0           | 0.03954352  | 0.2515263   | 0           | 0.04295091  | 0           | 0.03710725  |
| 0.07166051  | 0.09820258  | 0.7256302   | 0.0450330   | 0.05662216  | 0.1523782   | 0.0159388   |
| 0.5331052   | 0.08744002  | 0.03473461  | 0           | 0.06685519  | 0.1198834   | 0.073527162 |
| 0.1800674   | 0.04767895  | 0           | 0.02458238  | 0.2189339   | 0.042918607 | 0.166139008 |
| 0.15721     | 0.200075903 | 0           | 0           | 0.09990828  | 0.01127738  | 0           |
| 0.2968515   | 0.04465059  | 0.02334544  | 0.07027789  | 0           | 0.040942255 | 0.1060416   |
| 0.0353568   | 0.1869433   | 0.02503955  | 0.08514651  | 0.02573302  | 0.03534087  | 0.05070214  |
| 0.09296668  | 0.1272072   |             |             |             |             |             |
| AC025031.2  | 0.04722963  | 0           | 0           | 0.050473939 | 0           | 0           |
| 0.07410142  | 0           | 0.06154961  | 0.04488729  | 0.040234005 | 0.02398574  | 0.033853663 |
| 0.04334383  | 0.03811103  | 0.0371150   | 0.09077126  | 0.02622265  | 0.1373101   | 0.100263335 |
| 0.0409437   | 0.1238716   | 0.07711831  | 0.4168446   | 0.1528033   | 0.02501602  |             |
| 0.04909538  | 0.03965195  | 0.065523245 | 0.05961927  | 0.049767113 | 0.1939701   |             |
| 0.06218012  | 0.03981677  | 0.128514548 | 0           | 0.04731048  | 0.06092524  | 0.3258344   |
| 0           | 0.2170753   | 0.05635687  | 0.03398565  | 0.09193082  | 0.0954721   | 0.02964523  |
| 0           | 0.07248289  | 0           | 1.25566     | 0.06004257  | 0           | 0.03133738  |
| 0           | 0.09387148  | 0.03528944  | 0           | 0.1267876   | 0.1148927   | 0.2733236   |
| 0.03449046  | 0           | 0.0408572   | 0.6751132   | 0.129390035 | 0.03956839  | 0.6406786   |
| 0.0346403   | 0           | 0.03630601  | 0           | 0.02902325  | 0.039655123 | 0.02190647  |
| 0.04065692  | 0.2158067   | 0           | 0           | 0.08996912  | 0.1081942   | 0.2338478   |
| 0.03753113  | 0.04010957  | 0.09172911  | 0.1792704   | 0.04616764  | 0.2669589   | 0.03646118  |
| 0.04502589  | 0.1468746   | 0.025680392 | 0.02681096  | 0.0212321   | 0.03357876  | 0.865455297 |
| 0.2814436   | 0.03958359  | 0.1970556   | 0.1049332   | 0.02427925  | 0.02942001  |             |
| 0.2153186   | 0           | 0.05374399  | 0           | 0.026004989 | 2.3394420   | 0           |
| 0.6782961   | 0           |             |             |             |             |             |

|             |             |             |             |             |             |             |
|-------------|-------------|-------------|-------------|-------------|-------------|-------------|
| 0.1454648   | 0.1891312   | 0.2287856   | 0.03714306  | 0.3465730   | 0.1311271   | 0           |
| 0.04035515  | 0           | 0.1794398   | 0.03652682  | 0.04491752  | 0.06417172  | 0.07255026  |
| 0           | 0.07715499  | 0.098259743 | 0.02318633  | 0.1100213   | 0.1059357   | 0.06510229  |
| 0.060828932 | 0.06230695  | 0.2880955   | 0.1809198   | 0           | 0.1420991   | 0.1073463   |
| 0.02472567  | 0.08587209  | 0.1131447   | 0.1365821   | 0.07131157  | 0.1428558   |             |
| 3.6717450   | 0.03447369  | 0.03515697  | 0.04971531  | 0           | 0           | 0.168652596 |
| 0.0535881   | 0           | 0.029972595 | 0.2692862   | 0           | 0.1079516   | 0           |
| 0.226162944 | 0.04070596  | 0.03995459  | 0           | 0.0725482   | 0.03494038  | 0.06421627  |
| 0.07877426  | 0           | 0           | 0.087029725 | 0           | 0.02621683  | 0.09397293  |
| 0.03024868  | 0.1563606   | 0.08592928  | 0.03003651  | 0.07091272  | 0           | 0.01522273  |
| 0.1379008   | 0.07549945  | 0           | 0.2733068   | 0.1144630   | 0.2461281   | 0.032811094 |
| 0.2292297   | 0.1206268   | 0.08061571  | 0.1197436   | 0           | 0.1929014   | 0.148826431 |
| 0.03400961  | 0.1104614   | 0.09449193  | 0.05060487  | 0.068828779 | 0.08174191  |             |
| 0.04440156  | 0.3711668   | 0.02470407  | 0.2499504   | 0.1184545   | 0           | 0.1083335   |
| 0.2032373   | 0.1012280   | 0.1979139   | 0.05092998  | 0.03597537  | 0.055642475 |             |
| 0.048975125 | 0.1037864   | 0.098392307 | 0           | 0           | 0.03315378  | 0           |
| 0.124070464 | 0.1434632   | 0.2671551   | 0.02726568  | 0           | 0.2813245   | 0.1166251   |
| 0           | 0.0407006   | 0           | 0.2075548   | 0           | 0.1018249   | 0.02589341  |
| 0.068917603 | 0           | 0.033010052 | 0.07078     | 0           | 0.1201405   | 0.1649298   |
| 0.08748143  | 0           | 0.03348593  | 0.3359870   | 0.0570301   | 0.1664229   | 0           |
| 0.1130383   | 0           | 0.02975412  | 0           | 0.03634203  | 0.04587555  | 0.03989507  |
| 0.03802387  | 0           | 0           | 0.1017151   | 0.085836238 | 0.09178007  | 0.02211935  |
| 0           | 0.03760439  | 0.2010467   | 0.02573156  | 0           | 0.07657543  | 0.133557073 |
| 0.041546427 | 0.02765396  | 0           | 0           | 0.4085479   | 0.1135158   | 0.05307363  |
| 0.03436331  | 1.9036910   | 0.1256721   | 0.07148262  | 0           | 0           | 0.1800299   |
| 0.1016034   | 0.03151801  | 0.061651928 | 0.1634505   | 0.2779631   | 0.02308165  |             |
| 0.03859515  | 0.0416287   | 0.03422551  | 1.8697720   | 0.05135517  | 0.2931051   |             |
| 0.1262218   | 0.09442176  | 0.102143436 | 0.03603503  | 0           | 0.07748764  | 0.09107347  |
| 0.2048755   | 0.090425491 | 0.1275978   | 0.1952012   | 0.2101980   | 0.08503289  |             |
| 0.2217768   | 0.04953969  | 0.031160791 | 0.02937028  | 0.07024213  | 0.06279726  |             |
| 0.02339856  | 0.076913823 | 0.05167552  | 0.09935281  | 0           | 0.04354168  | 0.034395831 |
| 0.05202858  | 0.2507694   | 0           | 0.03602744  | 0.1850233   | 0.06337233  | 0.03728841  |
| 0.03125058  | 0.0289471   | 0           | 0.08736467  | 0.02973439  | 0.056737198 | 0           |
| 3.6392370   | 0.02515747  | 0.03191867  | 0.1895929   | 0.03316287  | 0.28548     |             |
| 0.05144015  | 0.2570759   | 0.3178186   | 0.03079146  | 0.1183549   | 0.1267024   | 0           |
| 0.08115145  | 0.08017884  | 0.08888601  | 0.0706830   | 0.2499553   | 0.04148815  | 0           |
| 0.03476887  | 0.07513808  | 0.08574924  | 0.08645918  | 0.08142055  | 0.05754393  |             |
| 0.1603747   | 0.1473940   | 0.1018723   | 0.2360797   | 0.05055005  | 0.04819615  |             |
| 0.1390852   | 0           | 0           | 0.1344636   | 0.0984545   | 0           | 0.07715999  |
| 0.07931959  | 0.2408973   | 0.06171032  | 0.151393248 | 0.09269019  | 0.09817148  | 0           |
| 0.1012308   | 0.02504374  | 0.029456631 | 0           | 0.03596634  | 0           | 0.08677309  |
| 0.6073814   | 1.7605310   | 0.1439986   | 0.2322026   | 0.03460951  | 0.1455287   | 0           |
| 0.03204568  | 0.05788119  | 0           | 0           | 0.3056773   | 0.03640002  | 0.1154755   |
| 0.02504537  | 0.02649229  | 0.02425575  | 0.27839     | 0.03828389  | 0.3928816   |             |

CRTC3-AS1 0.1856613 0.09541358 0.1431899 0.099207398 0.032677313  
0.2160783 0.1517755 0.1456476 0.02734393 0.09409307 0.1176356  
0.131801052 0.2200072 0.088719944 0 0.0749079 0.4133843 0.2973541  
0.2577054 0.2998726 0.131379542 0.5096785 0.4220178 0.1010516  
0.3991536 0.2002250.2950165 0.3216594 0.4935984 0.128787068  
0.1367132 0.114121139 0.3630967 0.5907111 0.7304318 0.101039024  
0.5264730.1859791 0.6386646 0.3202166 0.1537306 0.06095219  
0.3323112 0.3117304 0.1505763 0.3961543 0.2913410.1719264  
0.4748879 0.3788023 0.04329861 0.3802696 0.3313530.164251098  
0.3905646 0.5740187 0.4624134 0.06382405 0.2990439 0.07527451  
0.1790741 0.5875271 0.05045564 0.5353702 0.1720116 0.197803157  
0.1036965 0.2798366 0.2950398 0.209299183 0.2854404 0.1640304  
0.3993199 0.207847541 0.1865827 0.3995594 0.09426041 0.5029187  
0.6095414 0.7662887 0.4489439 0.1532107 0.02458936 0.09197539  
0.030049191 0.1761795 0.1663627 0.1943379 0.4777672 1.165239  
2.0592830.117775589 0.2283554 0.06955342 0.4399976 0.151205983  
0.5224499 0 0.2259344 0.2520808 0.1908851 0.2505773 0.5078548  
0.3152679 0.2288753 0.6477791 0.102226509 4.6493060.498562016  
0.4420314 0.4444009 0.3116432 0.2223772 1.6573440.1498940.3163564  
0.7064247 0.4939876 0.2925455 0.2115166 0.3274531 0.1881024  
0.2871764 0.1765723 0.4064209 0.2376646 0.4561227 0.4296735  
0.193131218 0.3038208 0.1982280.1908669 0.1919395 0.039853438  
0.3673962 0.1617876 0.6716907 0.1170532 0.1163743 0.4923122  
0.2591932 0.4219577 0.4002983 0.3355680.04672137 0.3275832  
1.4150740.2032759 0.3915760.2605768 0.4287679 0.2336492 0.1005718  
0.331489586 0.2457661 0.2192031 0.333832696 0.08821446 0.5799302  
0.2121807 0.4669552 0.5015542 0.04720125 0.02116796 0.2933637  
0.4188343 0.3253195 1.0773820.5265153 0.3155454 0.3440715  
0.4345447 0.08785328 0.057019475 0.2166904 0.4538288 0.3607075  
0.1678215 0.4309793 0.3963621 0.3483066 0.3659402 0.2755073  
0.6969008 0.3799432 0.3889670.4517440.07419773 0.1112998 0.3879699  
0.6249417 0.4837690.042993848 0.4505549 0.9286185 0.1848602  
0.2549713 0.1435557 0.2708221 0.253518127 0.1114108 0.1447426  
0.1392941 0.1657746 0.135284151 0.1204989 0.1745441 0.2431782  
0.5179336 0.1637606 0.1552162 0.1107370.07097714 0.3728353  
0.1989654 0.1556012 1.05109 0.2828408 0.072910829 0.256697208  
0.2039939 0.193391776 0.253837908 0.5938023 0.13288238 0.2606573  
0.03052687 0.6489176 0.108383394 0.4699656 0.07001307 0.321547  
0.55661578 0.2211792 0.1146144 0.3981057 0.1333296 0.3773037  
0.1586482 0.1750652 0.4503120.2097369 0.5937626 0.3972275  
0.225764561 0.8298996 0.519054618 0.3246117 1.17164 0.1731680.4234707  
0.4592442 0.1146308 0.1411689 0.08775623 0.6603882 0.238607156  
0.6165150.6814732 0.2391163 0.2592085 0.8296713 0.2924112  
0.3265057 0.8095501 0.1502820.9932496 0.1743853 0.1368337

|                    |                   |                   |                   |                    |                             |
|--------------------|-------------------|-------------------|-------------------|--------------------|-----------------------------|
| 0.1155748          | 0.2443501         | 0.281187677       | 0.4058894         | 0.2648286          | 0.4571272                   |
| 0.08695193         | 0.1838658         | 0.3449231         | 0.6366479         | 0.2191619          | 0.5721473                   |
| 0.2257655          | 0.109378638       | 0.272200729       | 1.2139130.8826092 | 0.1701284          |                             |
| 0.2230578          | 0.0495816         | 0.3619890.1854527 | 0.1801111         | 1.2027010.3119343  |                             |
| 0.4391302          | 0.2185560.3682851 | 0.2585102         | 0.7666790.1208332 | 0.1664193          |                             |
| 0.08259892         | 0.363533785       | 0.4069354         | 0.02276422        | 0.2873268          | 0.2781513                   |
| 0.1090959          | 0.1345417         | 1.3820780.2018789 | 0.4608825         | 0.2756567          |                             |
| 0.4949002          | 0.184034294       | 0.3305282         | 0.2881570.1269194 | 0                  | 0.06711438                  |
| 0.16292179         | 0.1950633         | 0.04795891        | 0.4992202         | 0.4178340.3228934  |                             |
| 0.7465119          | 0.122494145       | 0.1539408         | 0.4602071         | 0.1645721          | 0.2452815                   |
| 0.10078363         | 0.1015691         | 0.06509322        | 0.2250324         | 0.313800382        | 0.225351996                 |
| 0.1704385          | 0.07468053        | 0.1131972         | 0.1180209         | 0.2424443          | 0.0415198                   |
| 0.3908854          | 0.1637961         | 0.2086187         | 0.3116282         | 0.2575752          | 0.6623592                   |
| 0.631934996        | 0.1184104         | 1.33857           | 0.1084079         | 0.4450269          | 0.2300345                   |
| 0.2898374          | 0.2824561         | 0.2550526         | 0.4381282         | 0.3368581          | 0.2082260                   |
| 0.4652573          | 1.0376490.5295606 | 0.1196284         | 0.6653922         | 0.2038248          |                             |
| 0.3241669          | 0.1637638         | 0.1359095         | 0.9076416         | 0.1908690.09111843 |                             |
| 0.4922840.2809027  | 0.3398740.2400502 | 0.4147131         | 0.2451706         | 0.4055877          |                             |
| 0.2175464          | 0.7508693         | 0.1160047         | 0.1159165         | 0                  | 0.06074985 0.7161777        |
| 0.1336715          | 0.08809682        | 0.5375389         | 0.1438326         | 0.3033186          | 0.7497159                   |
| 0.4936961          | 0.06764111        | 0.3638781         | 0.59513208        | 0.4858244          | 0.4931142                   |
| 1.1717840.03316182 | 0.1476717         | 0.308786748       | 0.183373148       | 0.07069247         |                             |
| 0.053980771        | 0.1989797         | 0.6715230         | 0.5121526         | 0.3042654          | 0.3174528                   |
| 0.1716235          | 0.2710529         | 0.1469681         | 0.1706497         | 0.3607295          | 0.073641868                 |
| 0.2002713          | 0.3338761         | 0.1513127         | 0.1351141         | 0.2789536          | 0.2603553                   |
| 0.2065920.3191886  | 0.2508255         | 0.600612          |                   |                    |                             |
| DCUN1D2-AS         | 0.1587827         | 0                 | 0                 | 0                  | 0.1847962 0.06490134 0      |
| 0.07015588         | 0.03448758        | 0.1509079         | 0.067631961       | 0.3225536          | 0.113813655                 |
| 0.072859467        | 0.3843799         | 0.2495561         | 0.07629166        | 0                  | 0.3077513 0.168539171       |
| 0.3441247          | 0.2915134         | 0.08642213        | 0.6468011         | 0.5650855          | 0.3364084                   |
| 0.1650552          | 0.06665354        | 0.055071146       | 0.1503269         | 0.376455523        | 0.04657957                  |
| 0.0522613          | 0.1338612         | 0                 | 0.3241832         | 0.07952728         | 0.2048264 0 0 0             |
| 0                  | 0.4570295         | 0.3090650.4279607 | 0.09966519        | 0.1260311          | 0.08122748                  |
| 0.2915660.1110905  | 0.1009295         | 0.07084559        | 0.052677044       | 0.1252582          |                             |
| 0.2629912          | 0.5932032         | 0.2046904         | 0.4688762         | 0.1287537          | 0.4594475 0                 |
| 0.3883596          | 0.2060386         | 0.06304677        | 0.217500139       | 0.1330262          | 0.673099                    |
| 0.5822913          | 0.119332331       | 0.3051457         | 0.1402834         | 0.1951483          | 0.133317759                 |
| 0.3682401          | 0.06834286        | 0.0604606         | 0.3395606         | 0.2792661          | 0 0.3031179                 |
| 0.1965450          | 0.1348456         | 0                 | 0.1130052         | 0.1552124          | 0.5484706 0.06128997        |
| 0.1513739          | 0.4444039         | 0.043167843       | 0                 | 0.03569041         | 0.2257789 0.096986679       |
| 0.2365484          | 0                 | 0                 | 0.1175927         | 0.04081257         | 0.24727 0.4343316 0.2311079 |
| 0.04517088         | 0.05193738        | 0.305994362       | 1.8351770         | 0                  | 0.35631 0.04703399 0        |
| 0.1987019          | 0                 | 0                 | 0                 | 0.2501930.0678356  | 0 0.06032642 0.4298022      |
| 0.5662859          | 0.2516977         | 0                 | 0                 | 0.1945423          | 0.082585601 0.1559016       |

|             |             |             |             |             |             |             |
|-------------|-------------|-------------|-------------|-------------|-------------|-------------|
| 0.09247098  | 0.1780742   | 0.05471734  | 0           | 0.1571037   | 0.06918265  | 0           |
| 0.05005357  | 0.2388636   | 0.09022266  | 0.2493779   | 0.2886960   | 0.07607694  | 0           |
| 0.2397445   | 0.04002261  | 1.9968480   | 0           | 0.4178485   | 0           | 0.05994699  |
| 0.06450888  | 0           | 0.09007973  | 0.2499581   | 0.100765775 | 0.2263304   | 0.4578208   |
| 0.06048762  | 0.3423027   | 0.4740950   | 0.1211035   | 0.325861737 | 0.06842531  |             |
| 0.2014868   | 0.06955559  | 0.6097550   | 0.1174671   | 0.1619180   | 0.3531114   | 0.3344713   |
| 0.04508074  | 0.146293934 | 0.07942271  | 0.1369860   | 0.3966263   | 0.5382212   |             |
| 0.2764391   | 0.1525410   | 0.5256733   | 0           | 0.05049033  | 0.1788027   | 0.051306    |
| 0.2558888   | 0           | 0.2538239   | 0.1903734   | 0.1531397   | 0           | 0.8274655   |
| 0.110308611 | 0.2568847   | 0.2027695   | 0.0677561   | 0.4025697   | 0.1841593   |             |
| 0.3242605   | 0.150103226 | 0.05716897  | 0           | 0.1191282   | 0.08506501  | 0.231397556 |
| 0.06870265  | 0           | 0.1247837   | 0.4567935   | 0.2100790   | 0.5973535   | 0.2272928   |
| 0.06070163  | 0.1366539   | 0           | 0.3326863   | 0.1284173   | 0.1209467   | 0.187066121 |
| 0.246976436 | 0.6978451   | 0.220525385 | 0           | 0           | 0.06818683  | 0.2229214   |
| 0.2349669   | 0.2134509   | 0.208558126 | 0.4823132   | 0.2694471   | 0.137498    |             |
| 0.826794739 | 0.1891587   | 0.1960428   | 0.1075172   | 0.3762896   | 0.1613403   |             |
| 0.4651898   | 0           | 0.4279105   | 0.08968642  | 0.3482073   | 0.3135877   | 0.057924044 |
| 0.09678454  | 0.110977495 | 0.03965957  | 0.2630301   | 0.0403904   | 0           | 0.3465516   |
| 0.09803549  | 0           | 0           | 0.3765216   | 0.357111112 | 0.2396640   | 0.2098134   |
| 0.04750335  | 0           | 0           | 0.1288785   | 0.1221794   | 0.1927880   | 0.8718089   |
| 0.3510719   | 0           | 0           | 0.384767266 | 0.07713955  | 0.2264888   | 0.2039728   |
| 0.1115456   | 0.2021750   | 0.06321167  | 0           | 0.1297616   | 0.06382387  | 0.06436032  |
| 0.112252393 | 0.139676192 | 0.1394560   | 0.06235652  | 0.2861478   | 0.06360535  |             |
| 0.05463231  | 0.1486915   | 0           | 1.3714450   | 0.9858356   | 0.2002663   | 0.5751584   |
| 0.4421702   | 0.1210496   | 0           | 0.3415835   | 0.3708647   | 0.310904229 | 1.044068    |
| 0.2920289   | 0.2327967   | 0           | 0           | 0           | 0.3223613   | 0.1726525   |
| 0.1970798   |             |             |             |             |             |             |
| 0.3536241   | 1.3887970   | 0.042924889 | 0           | 0.2772448   | 0.06512701  | 0.1020609   |
| 0.1147962   | 0.266003674 | 0.1072437   | 0           | 0.1325008   | 0.07146866  | 0.2071106   |
| 0.1665490   | 1.04760408  | 0.1974816   | 1.0626710   | 0.21112     | 0.5113182   | 0.25857891  |
| 0           | 0.07217024  | 0.365960231 | 0.231272772 | 0.08745823  | 0.1916066   | 0           |
| 0.3028044   | 0.2488142   | 0           | 0.1253610   | 0.3406134   | 0.3331414   | 0.03671424  |
| 0.4998247   | 0.143059878 | 0           | 2.4684370   | 0.1390701   | 0.1268665   | 0.05365417  |
| 0.2124660   | 0.5017106   | 0           | 0.0864691   | 0.1440452   | 0.1942698   | 0           |
| 0.5172713   |             |             |             |             |             |             |
| 0.1064912   | 0           | 0.1705160   | 0.04492595  | 0.07470714  | 0.2970392   | 0.4848071   |
| 0.2092204   | 0.04851502  | 0           | 0.05844526  | 0.1894567   | 0.04804716  | 0.3633372   |
| 0.06843255  | 0.3869174   | 0.2246536   | 0.1982114   | 0.2790776   | 0.1284329   |             |
| 0.04960521  | 0.04248644  | 0.1620321   | 0.3117298   | 0.7464784   | 0.04899411  | 0           |
| 0.05516619  | 0.2635920   | 0.08646883  | 0.2404417   | 0           | 0.1156971   | 0.1555993   |
| 0.424144624 | 0.07790449  | 0.1100152   | 0.1734477   | 0           | 0.2104883   | 0.247577847 |
| 0.052275276 | 0           | 0           | 0.4375876   | 0.1276234   | 0           | 0.6570108   |
| 0.1561298   |             |             |             |             |             |             |
| 0.1163548   | 0.1957029   | 0.07727065  | 0.0808015   | 0.2432406   | 0.3085059   |             |
| 0.094470868 | 0.1468094   | 0.4894973   | 0.1941103   | 0           | 0.2947028   | 0.08906524  |
| 0.3261845   | 0.2924775   | 0           | 0.132084    |             |             |             |
| AC006059.1  | 0.2640648   | 0.8142364   | 0.1527435   | 0.765982216 | 0.139430138 |             |

|             |             |             |             |             |             |             |
|-------------|-------------|-------------|-------------|-------------|-------------|-------------|
| 0.3512305   | 0.8018002   | 0.7990210   | 0.4666930   | 0.4260644   | 0.0717053   | 0.482039262 |
| 0.4214769   | 0.75711453  | 0.830876369 | 0.3348431   | 0.2371577   | 0.2900055   |             |
| 0.3770049   | 0.2924618   | 0.560580605 | 0.2289196   | 0.0395758   | 0.1231928   |             |
| 0.3585558   | 0.2196864   | 0.2397714   | 0.5293858   | 0.3167105   | 0.235508072 |             |
| 0.3571460   | 0.536628955 | 0.2655925   | 0.2979893   | 0.3180270   | 0.020529585 | 1.335002    |
| 0.4534574   | 0.3893007   | 0.7156943   | 0.1561786   | 0.1733837   | 0.3601097   |             |
| 0.1900166   | 0.2202826   | 0.1779308   | 0.3314979   | 0.05988482  | 0.09648996  |             |
| 0.3232607   | 0.1583571   | 0.2078161   | 0.3029664   | 0.325389794 | 0.1785527   |             |
| 0.4498656   | 0.2536794   | 0.01945211  | 0.5063428   | 0.4588389   | 0.4366215   |             |
| 0.1928390   | 0.1845327   | 0.3263371   | 0.2097008   | 0.068898133 | 0.8849206   |             |
| 1.2579950   | 0.5533622   | 0.255158367 | 0.4349784   | 0.1333139   | 0.1854530   | 0.443430153 |
| 0.8398688   | 0.3896849   | 0.1149136   | 0.6131123   | 0.5573227   | 0.2515124   |             |
| 0.8353698   | 0.09339019  | 0.1798626   | 0.1121280   | 0.1252895   | 0.4793789   |             |
| 0.2369190   | 0.6698174   | 0.4135786   | 0.2111626   | 0.266650792 | 0.08565844  |             |
| 0.8309729   | 0.1877416   | 0.276504699 | 0.4870587   | 0.9168770   | 0.2360902   |             |
| 0.1676257   | 0.03878493  | 0.3054809   | 0.4127533   | 0.2745326   | 0.3219504   |             |
| 0.1974282   | 0.207708639 | 8.5331540   | 0.177275316 | 0.2487158   | 0.3047472   |             |
| 0.3799268   | 0.2711018   | 0.3398941   | 0.6213059   | 0.1483356   | 0.1845446   |             |
| 0.6545917   | 0.1902104   | 0.5479561   | 0.1330669   | 0.2579819   | 0.787723    |             |
| 0.2331992   | 0.2050225   | 0.2028172   | 0.9002924   | 0.3389414   | 0.392413113 |             |
| 0.3518709   | 0.2416614   | 0.2538408   | 0.4679901   | 0.583027877 | 0.2985971   |             |
| 0.4602189   | 0.3853476   | 0.3329678   | 0.9363607   | 0.2572208   | 0.1974903   |             |
| 0.3086473   | 0.3434123   | 0.5454583   | 0.1708752   | 0.4564107   | 7.97872     |             |
| 0.1376752   | 0.1404040   | 0.5559248   | 0.4259155   | 0.4272655   | 0.1226080   | 0.303091274 |
| 0.5992310   | 0.4156947   | 0.335158521 | 0.1882002   | 0.1631533   | 0.1724475   |             |
| 0.3524046   | 0.06436304  | 0.2301737   | 0.232254321 | 0.1950775   | 0.2233894   |             |
| 0.1982999   | 0.3090461   | 0           | 0.3590385   | 0.3250818   | 0.2913664   | 0.2998874   |
| 0.173782284 | 0.1509537   | 0.06509017  | 0.1884606   | 0.2557408   | 0.3189992   |             |
| 0.2899250   | 0.4995571   | 0.2059019   | 0.4558280   | 0.3681589   | 1.0970330   | 0.5593044   |
| 0.3855074   | 0.09045507  | 0.5653606   | 0.1455315   | 0.3656984   | 0.9174151   |             |
| 0.052414156 | 0.4882446   | 0.1445217   | 0.1287797   | 0.3347483   | 0.35002     |             |
| 0.1980969   | 0.142645868 | 0.8964241   | 0.2352758   | 0.1132098   | 0.1616777   |             |
| 0.494778087 | 0.1142564   | 0.5674350   | 0.3261067   | 0.2565132   | 0.1996419   |             |
| 0.2838381   | 0.2970008   | 0.7499164   | 0.1623309   | 0.4851207   | 0.1896948   |             |
| 0.1423769   | 0.3735481   | 0.266658586 | 0.176029702 | 0.04144844  | 0.209569347 |             |
| 0.33758825  | 0.4289833   | 0.226797214 | 0.7944237   | 0.7815268   | 0.6288238   |             |
| 0.09909832  | 0.4201552   | 0.1066919   | 0.1960003   | 0.178572344 | 0.1348207   |             |
| 0.5589093   | 0.07663167  | 0.2438147   | 0.2299870   | 0.1105196   | 0.2667792   |             |
| 0.2643233   | 0.6818453   | 0.1654539   | 0.3725102   | 0.247708301 | 0.5058687   |             |
| 0.2900259   | 0.3203584   | 0.6606148   | 0.5373724   | 0.1376684   | 0.2305341   |             |
| 0.4425334   | 0.3442004   | 0.2942070   | 0.5367232   | 0.436331939 | 0.2505329   |             |
| 0.9969475   | 0.1227405   | 0.1128583   | 0.4270605   | 0.1663578   | 0.2449513   |             |
| 0.1161093   | 0.2381730   | 0.6373047   | 0.3644479   | 0.4170376   | 0.4696607   |             |
| 0.2166467   | 0.297091795 | 0.4948232   | 0.1614274   | 0.2665288   | 0.936367    |             |

|             |             |             |            |             |             |            |             |           |             |            |   |            |   |   |
|-------------|-------------|-------------|------------|-------------|-------------|------------|-------------|-----------|-------------|------------|---|------------|---|---|
| 0.1280871   | 0.4204986   | 0.4817437   | 0.1233148  | 0.1819590   | 0.3975582   |            |             |           |             |            |   |            |   |   |
| 0.373364328 | 0.099552649 | 0.5521985   | 0          | 0.6222148   | 0.2991247   | 0.1511134  |             |           |             |            |   |            |   |   |
| 0.1557543   | 0.4521738   | 0.1372344   | 2.3622480  | 0.4889337   | 0.5688065   |            |             |           |             |            |   |            |   |   |
| 0.1332217   | 0.1952085   | 0.5252532   | 0.8340085  | 0.1178470   | 0.2231715   |            |             |           |             |            |   |            |   |   |
| 0.2265683   | 0.418565545 | 0.1827731   | 0.2220164  | 0.2949747   | 0.4007504   |            |             |           |             |            |   |            |   |   |
| 0.06649986  | 0.6560835   | 2.8336990   | 0.04101872 | 0.2809328   | 0.2016332   |            |             |           |             |            |   |            |   |   |
| 0.3770856   | 0.142773102 | 0.6619888   | 0.5269418  | 0.5879683   | 0.2424759   |            |             |           |             |            |   |            |   |   |
| 0.1090929   | 0.216675604 | 0.2038314   | 0.1364232  | 0.4616992   | 0.4414669   |            |             |           |             |            |   |            |   |   |
| 0.2361852   | 0.2374119   | 0.398223004 | 0.5160938  | 0.6732507   | 0.2257101   |            |             |           |             |            |   |            |   |   |
| 0.3364028   | 0.184299236 | 0.2889221   | 0.1587114  | 0.5829701   | 0.521668151 |            |             |           |             |            |   |            |   |   |
| 0.219782788 | 0.3601571   | 0.2731310   | 0.1103997  | 0.08632818  | 0.3546791   | 0          |             |           |             |            |   |            |   |   |
| 0.1786994   | 0.1996852   | 0.4161744   | 0.1266362  | 0.2093413   | 0.5937409   |            |             |           |             |            |   |            |   |   |
| 0.135952445 | 0.2598391   | 13.105890   | 0.2643219  | 0.2210332   | 0.1529656   |            |             |           |             |            |   |            |   |   |
| 0.6057311   | 0.2119044   | 0.5804154   | 0.2465195  | 0.2737776   | 0.2307727   |            |             |           |             |            |   |            |   |   |
| 0.2459395   | 0.1134398   | 0.2024010   | 0.1359140  | 0.2268623   | 0.4055926   | 0.1419912  |             |           |             |            |   |            |   |   |
| 0.5927918   | 0.3685769   | 0.6296157   | 0.04610472 | 0.6648286   | 0.138854    |            |             |           |             |            |   |            |   |   |
| 0.1800442   | 0.7533917   | 0.1726430   | 0.1838474  | 0.2775402   | 0.4238188   |            |             |           |             |            |   |            |   |   |
| 0.4309704   | 0.2441043   | 0.1414222   | 0.06056347 | 0.3849552   | 0.2592122   |            |             |           |             |            |   |            |   |   |
| 0.7093923   | 0.2328      | 0.6801972   | 0.2359145  | 0.7765387   | 0.5546673   |            |             |           |             |            |   |            |   |   |
| 0.4855545   | 0.1583866   | 0.2748728   | 0.3696723  | 0.161228988 | 0.3516618   |            |             |           |             |            |   |            |   |   |
| 0.3397859   | 0.1648305   | 0.2425671   | 0.3800588  | 0.352916702 | 0.273229884 |            |             |           |             |            |   |            |   |   |
| 0.1723635   | 0.032904203 | 0.6584254   | 0.3941693  | 2.3436370   | 0.3943386   |            |             |           |             |            |   |            |   |   |
| 0.7233184   | 0.4146528   | 0.1394851   | 0.7343173  | 0.2559572   | 0.4623122   |            |             |           |             |            |   |            |   |   |
| 0.5130631   | 0.134666116 | 0.2092735   | 0.6105466  | 0.1537222   | 0.4117969   |            |             |           |             |            |   |            |   |   |
| 0.3200703   | 0.4020416   | 0.3874740   | 0.3335361  | 0.3975184   | 0.1673625   |            |             |           |             |            |   |            |   |   |
| AP003900.1  | 0           | 0           | 0.2402138  | 0           | 0           | 0          | 0           | 0         | 0           | 0          | 0 | 0          | 0 | 0 |
| 0.02577737  | 0           | 0           | 0.01547886 | 0           | 0           | 0          | 0           | 0         | 0           | 0          | 0 | 0          | 0 | 0 |
| 0.0268196   | 0           | 0           | 0          | 0           | 0           | 0          | 0.817086346 | 0.1739235 | 0           | 0          |   |            |   |   |
| 0.2203864   | 0           | 0           | 0.8386049  | 0           | 0           | 0.03108987 | 0           | 0         | 0           | 0.06536753 |   |            |   |   |
| 0.1173184   | 0           | 0.08122264  | 0          | 0           | 0           | 0          | 0.04773782  | 0.2306134 | 0           | 0          |   |            |   |   |
| 0.3697388   | 0           | 0           | 0          | 0           | 0.525097423 | 0          | 0           | 0         | 0           | 0          | 0 | 0.01963061 |   |   |
| 2.01163124  | 0.3704249   | 0           | 0          | 0.1093041   | 0           | 0          | 0.2439331   | 0         | 0           | 0          |   |            |   |   |
| 0           | 0.1970379   | 0           | 0.1003136  | 0           | 0.3654528   | 0          | 0           | 0         | 0           | 0          |   |            |   |   |
| 0.15609938  | 0.06345384  | 0           | 0          | 0           | 0           | 0.3581815  | 0.1165089   | 0         | 0           |            |   |            |   |   |
| 0.3134732   | 0           | 0.05274471  | 0          | 0           | 0           | 0          | 0           | 0         | 0           | 0.4019624  | 0 |            |   |   |
| 1.0864670   | 0.2013420   | 0           | 0          | 0           | 0           | 0.04340417 | 0           | 0         | 0.1043715   | 0          | 0 |            |   |   |
| 0           | 0.1074784   | 0           | 0          | 0.08428578  | 0.1948607   | 0          | 0.02014022  | 0         | 0           | 0          |   |            |   |   |
| 0           | 0           | 0.06928555  | 0.3617504  | 0.04831208  | 16.361740   | 0          | 0           | 1.0820180 |             |            |   |            |   |   |
| 0           | 1.083688446 | 0.4349481   | 0          | 0.304090891 | 0.09106929  | 0          | 0.0730158   | 0         |             |            |   |            |   |   |
| 0           | 0           | 0           | 0.1101301  | 0.0540486   | 0.2238985   | 0          | 0.07089843  | 0.5863631 |             |            |   |            |   |   |
| 0           | 0           | 0.2176714   | 0          | 0           | 0.1377988   | 0.3014512  | 0           | 0         | 0           | 0.3595787  |   |            |   |   |
| 0           | 0.08126383  | 0           | 0          | 0           | 0           | 0          | 0           | 1.3040540 | 0.266311405 | 0          | 0 |            |   |   |
| 0.1090530   | 0.02470026  | 1.0810680   | 0          | 0.04980894  | 0           | 0          | 0           | 0.4146616 |             |            |   |            |   |   |
| 0.5105461   | 0           | 2.2724550   | 0.1602394  | 0.9831579   | 0           | 0          | 0           | 0.7764116 |             |            |   |            |   |   |



0 0 0 0.612823048 0 0 0 0 0.027436556 0.0224244 0 0  
0.727291158 0 0 0 0 0.03805619 0 0.1730481 0.3578755  
0.3570546 0.07019247 1.0843840.5681931 0 0.4553552 0 0.116535429  
0 0 0.07978976 0.7710928 0.2112762 0.08743506 0.4741065 0 0  
0.02264906 0 0.061582268 0.07714751 0.7035273 0 0 0 0 0  
0 0 0.2314657 0.02354366 0 0 0 0.03103889 0 0.2462196 0  
0.1898162 0 0.06799152 0 0.1027241 0 0 0 0 0.1242508  
0.2007248 0.4835805 0.02559309 0 0.0119659 0 0 0 1.3316910  
0 0 0.06088389 0 0 0.08527202 0 0 0.2820111 0 0 0 0  
0 0.1389415 0 0 0.04789842 0.017271827 0 0 0 0 0.02309545  
0 0 0.01650366 0.03554318 0.5751415 0 0 0 0 0.02375502 0  
0.01582621 0.034681745 0 0 0 0 0.558347858 0.1407634 0 0  
0.02436808 0 0 0 0.9723076 1.1943250.5361887 0.04431849 0  
0.038375645 0.09779393 0.04318405 0 0.5955562 0 0 0 0.1228765  
0 0 0 0 0.03202094 0 0.5179249 0 0.54231 0 0 0.3901468  
0.1403078 0 0.02814943 0 0.4573939 0.1353302 0 0 0 0 0  
0 1.0335590.5987943 0 0 0 0 0 0 0 0.2757622 0.06958549  
1.6688910 0 0.1669574 0 0 0.02213359 0.32569 0 0.1355118  
0.677407175 0.021034173 0 0.111455444 0 0.1540567 4.3661930 0 0  
0.5118466 0.03109164 0 0.09787353 0 0.057018825 0.1181443 0  
0.07810479 0 0 0 0.01640599 0.4942775 0.1294714 0.1594413  
AC004837.2 0.08102045 0 0.02343241 0 0.342240089 0.03143137 0.0662331  
0 0 0.01759763 0.3465102 0.207059273 0.1645862 0.058074546  
0.074354531 0.1307558 0 0.1167857 0 0.1962915 0.257996351  
0.2107116 0.1912469 0.3748309 0.1925214 0.2359150.2574836  
0.1684421 0.2720851 0.056201197 0.1022744 0.170746812 0 0.5866707  
0.06830401 0.022046134 0.1654177 0.04057958 0.1045147 0.1397388  
0.1006294 0.02659883 0.09667787 0.2040533 0.2365552 0.1910748  
0.07628273 0.0321543 0.04144713 0.2479574 0 0.2231678 0.07229933  
0.215031875 0.06391422 0.3489040.2118815 0.1044453 0.2827485  
0.2299425 0.7033130.1183339 0.1981643 0 0.09651071 0.110981603 0  
0.6640138 0.05942398 0.152226264 0.06228145 0.0715810.1991527  
0.204080127 0.2066880.03487262 0.2468050.06930566 0.2564970 0.03093378  
0.2507226 0.06438309 0.3268299 0 0.05766204 1.0691820.3561887  
0.03127381 0.7337803 0.1511743 0.08810728 0.02299654 0.03642278  
0.05760296 0.247442075 0.3218698 0.2037120.2112754 0.1200056  
0.1249501 0.1009376 0.0738740.2653315 0.09219557 0.1590094  
0.089220948 6.2204850.027195842 0 0.2545350.09599824 0.1663592  
0.1419455 0.07849442 0.06371736 0.03302953 0.2811789 0.2553270  
0.09526452 0.1846929 0.1253205 0.0577906 0.1284312 0.06222847 0  
0.1654452 0.126420367 0.1193255 0.07077635 0.5906169 0 0.052174747  
0.1870487 0.2118068 0.2069069 0.1787823 0 0.09207402 0.06362377  
0.07365499 0.1164570.1464380.3975791 0.1021097 3.6125050.1182764 0  
0.04264227 0.02078993 0 0.0329163 0.180822807 0.3217485 0.1275436

1.028334724 0.2309747 0.8760285 0.06172882 0.2328844 0.06911763  
0.4943540.110849455 0.03491469 0.06854043 0.2129486 0.3941025  
0.02996938 0.1101603 0.2477456 0.6826692 0.06900869 0.223943792  
0.1621049 1.1183760.08994777 0.4119491 0.2821116 0.07783554  
0.1877610.07370405 0.07728958 0.03041195 0.05235879 0.2089117  
0.05914076 0.09713712 0.07285495 0 0.03272609 0.6333337 0.084429095  
0.2949255 0.02586628 0 0.2310921 0.06264607 0.2600041 0.102122213  
0 0.0947460.08104848 0.08681053 0 0.2629216 0.03808451 0.06367211  
0.3390304 0.02679872 0.2438445 0.1159784 0.1548680.1045935  
0.08682621 0.3055617 0.1310524 0.1542856 0.238630859 0.336059136  
0.2225515 0.112525265 0.120842123 0.1151682 0.243551044 0.1421848  
0.3996473 0.08713237 0.070945902 0.2871226 0.3895495 0.163706  
0.268469228 0 0.1500492 0.1371543 0.2967358 0.2058137 0.6527612  
0.05729732 0.2620147 0 0.06662859 0.1600112 0.118225272 0.04938527  
0.028313684 0.08094676 0.1150403 0.1442672 0 0.1414651 0.02501179  
0.1108881 0.02872186 0.2881858 0.104125421 0.1956655 0.2498051  
0.2141871 0.07271717 0.09654907 0.05104196 0.06576154 0.1558581  
0.3147904 0.3079725 0.06522836 0.1492816 0 0 0.245414142  
0.2558479 0.1733522 0.07805937 0.05691723 0 0.06450877 0.0574812  
0.04414142 0.2279673 0.03284049 0.17183369 0.035635581 0.118598  
0.05252189 0.06363606 0.4964332 0.1622763 0.1393834 0.1213941  
0.05894882 0.6414772 0.1750173 0.1796544 0.1635006 0.2305917  
0.2820272 0.3088338 0.1581907 0.2396575 0.1622035 0.237962949  
0.08411777 0.1788128 0.07919123 0.09931256 0.0714123 0.08806866  
0.8224402 0.1321465 0.2765453 0.03608803 0.8098829 0.02190285 0  
0.1886226 0.0332317 0.1301939 0.02928794 0.542924051 0.2371294  
0.2511446 0.2253662 0.1823380.02113605 0.1274749 0.106910075  
0.3274927 0.5723629 0.08079455 0.1605570.241894498 0.0443236  
0.0426089 0.1104767 0.074693935 0.147511532 0.1636302 0.2737537  
0.0889163 0.1236072 0.1269599 0.1630689 0.1279334 0.3216544  
0.2482877 0.2379842 0.09366903 0.1785284 0.048665148 0.09301126  
5.3667550.07096192 0.1510480.1095103 0.1355161 0.4551161 0  
0.1323651 0.1470010.04956405 0.07923221 0.1015165 0.05433817  
0.1459542 0.1566134 0.2292391 0.03812006 0.2728209 0.4947553  
0.07117119 1.2872740 0.05964455 0.1288962 0.3922646 0.1483171  
0.03491839 0.1974284 0.1604844 0.1769938 0.1780026 0.305826  
0.1012462 0.2601495 0.08267848 0.1192974 0.2929985 0.04999946  
0.1537778 0.2533419 0 0.1985471 0.3373914 0.06803473 0.3246958  
0.02646537 0.0432848 0.3378881 0.02806818 0.2360091 0 0.2792497  
0.075797431 0.160043869 0 0.636027884 0.0372139 0.06512109 0  
0.2117345 0.1394168 0.2671703 0.2496484 0 0.1236893 0.8936349  
0.1049455 0.096409395 0.03745548 0.2185495 0.1650778 0 0.08592859  
0.1136161 0.2704632 0.5074144 0.06567441 0.584109  
AC087854.1 0.2470170.3733676 0.3193844 0.302806487 0.26085731 0.1803833

|             |             |             |             |             |             |
|-------------|-------------|-------------|-------------|-------------|-------------|
| 0.4573188   | 0.3191670   | 0.2568022   | 0.3692523   | 0.2002418   | 0.396101611 |
| 0.3357592   | 0.572837863 | 0.300035857 | 0.2403632   | 0.4110696   | 0.3002066   |
| 0.2097555   | 0.1689763   | 0.03855809  | 0.2519303   | 0.2324690   | 0.0593145   |
| 0.08385194  | 0.22095     | 0.2347369   | 0.1963574   | 0.1280906   | 0.120951152 |
| 0.4126982   | 0.111005326 | 0.1065639   | 0.1817350   | 0.06124906  | 0.0909376   |
| 0.1334989   | 0.1164423   | 0.4498543   | 0.1879583   | 0.06015711  | 0.1574199   |
| 0.4074536   | 0.1516097   | 0.07777807  | 0.09301269  | 0.1231266   | 0.05189969  |
| 0.08919877  | 0.08893861  | 0.06607924  | 0.2001174   | 0.1361466   | 0.086769793 |
| 0.06877521  | 0.2502932   | 0.04342783  | 0.1948074   | 0.08191425  | 0.1178242   |
| 0.1121190   | 0.1008059   | 0.2073125   | 0.1696937   | 0.08654236  | 0.119422304 |
| 0.2434679   | 0.2012141   | 0.2877456   | 0.02184051  | 0.1005274   | 0.1925627   |
| 0.09375591  | 0.170801114 | 0.2291472   | 0.09381215  | 0.08299241  | 0.1491534   |
| 0.1891144   | 0.1176375   | 0.1331458   | 0.4136801   | 0.1039196   | 0.05244454  |
| 0.105828297 | 0.06549461  | 0.06746751  | 0.2509562   | 0.1570443   | 0.2043232   |
| 0.1039293   | 0.134311724 | 0.1278520   | 0.07185367  | 0.1962825   | 0.097629133 |
| 0.1443123   | 0.1887601   | 0.04546879  | 0.1452742   | 0.06349178  | 0.1719728   |
| 0.1324875   | 0.1216066   | 0.1984150   | 0.1473386   | 0.128008857 | 2.0992420   |
| 0.1117675   | 0.1565107   | 0.1635574   | 0.1193411   | 0.1527411   | 0.2674703   |
| 0.2399718   | 0.1007012   | 0.06555553  | 0.2014803   | 0.09932357  | 0.04271244  |
| 0.09384932  | 0.06742586  | 0.6045848   | 0.1020041   | 0.2901654   | 0.1529894   |
| 0.2611079   | 0.16626532  | 0.07133379  | 0.1142389   | 0.2240672   | 0.09513784  |
| 0.290071626 | 0.06229931  | 0.1582748   | 0.09276799  | 0.1190921   | 0.07650551  |
| 0.1155895   | 0.07606964  | 0.07265208  | 0.1705665   | 0.01575753  | 0.03290899  |
| 0.1904511   | 2.7410120   | 0.1113629   | 0.05408102  | 0.1988368   | 0.1640548   |
| 0.1097165   | 0.5844258   | 0.084315954 | 0.3709490   | 0.3431098   | 0.041495425 |
| 0.08802509  | 0.3456401   | 0.1273119   | 0.4019985   | 0.1053637   | 0.299223    |
| 0.059640053 | 0.5385051   | 0.04916885  | 0.07638145  | 0.08927914  | 0.2526148   |
| 0.2518945   | 0.07068618  | 0.0918237   | 0.2557746   | 0.140569232 | 0.1817019   |
| 0.05641095  | 0.1855118   | 0.07387997  | 0.3216371   | 0.1209799   | 0.2357147   |
| 0.2974110   | 0.2079196   | 0.2727078   | 0.2253637   | 0.3699840   | 0.1803097   |
| 0.1437259   | 0.08408407  | 0.09390685  | 0.05679183  | 0.060566897 | 0.158678    |
| 0.08350063  | 0.1426103   | 0.1335438   | 0.3876110   | 0.08054235  | 0.05952327  |
| 0.1412534   | 0.02265598  | 0.2034961   | 0.1868258   | 0.497623965 | 0.1948991   |
| 0.1570940   | 0.07422425  | 0.08360352  | 0.09131684  | 0.03644306  | 0.1663989   |
| 0.1722014   | 0.1625699   | 0.2180028   | 0.1400449   | 0.2507015   | 0.2490297   |
| 0.085593306 | 0.033901697 | 0.2634254   | 0.085767386 | 0.260065531 | 0.1652364   |
| 0.205915528 | 0.1325989   | 0.3440340   | 0.03515971  | 0.050894459 | 0.2059731   |
| 0.0493149   | 0.08388411  | 0.061904495 | 0.08655076  | 0.1345510   | 0.3443662   |
| 0.1690433   | 0.06644006  | 0.01596379  | 0.2260686   | 0.1762139   | 0.1887684   |
| 0.07567913  | 0.2152261   | 0.12721689  | 0.1151394   | 0.147257553 | 0.4355158   |
| 0.09971949  | 0.09979678  | 0.1657105   | 0.04439873  | 0.1121419   | 0.02651593  |
| 0.2524014   | 0.06316929  | 0.182072597 | 0.1579101   | 0.03200048  | 0.2275223   |
| 0.08694186  | 0.1471805   | 0.1006939   | 0.1945983   | 0.07267515  | 0.3422602   |
| 0.2270671   | 0.0701893   | 0.2141803   | 0.1628142   | 0.1303880   | 0.184855373 |

|             |             |             |             |             |             |
|-------------|-------------|-------------|-------------|-------------|-------------|
| 0.08823924  | 0.3627099   | 0.3546505   | 0.1122845   | 0.3145220   | 0.2313833   |
| 0.08762499  | 0.1068718   | 0.09929027  | 0.08245574  | 0.344124086 | 0.153383374 |
| 0.4764405   | 0.06593585  | 0.2054277   | 0.1152173   | 0.05238547  | 0.1549837   |
| 0.1986615   | 0.1374364   | 0.1098148   | 0.1360148   | 0.08377115  | 0.0146613   |
| 0.04887395  | 0.6878806   | 0.04984831  | 0.09078498  | 0.4141783   | 0.0824216   |
| 0.13277248  | 0.1508589   | 0.2191363   | 0.3124518   | 0.07124385  | 0.08965082  |
| 0.1790038   | 0.3982459   | 0.4502901   | 0.1713327   | 0.0776654   | 0.09441017  |
| 0.023568671 | 0.2716154   | 0.1775972   | 0.3039527   | 0.05603834  | 0.06303087  |
| 0.097369353 | 0.09159743  | 0.3678340   | 0.09700255  | 0.09156264  | 0.2274355   |
| 0.03810278  | 0.134214635 | 0.1807180   | 0.1728825   | 0.1497289   | 0.2843476   |
| 0.15775259  | 0.07949104  | 0.09169904  | 0.1651098   | 0.140655863 | 0.058201189 |
| 0.1413937   | 0.2595057   | 0.1435182   | 0.2327642   | 0.09107722  | 0.1364775   |
| 0.08030364  | 0.1394085   | 0.1424913   | 0.09145858  | 0.08063442  | 0.05946149  |
| 0.11782434  | 0.09452494  | 0.5008862   | 0.1718076   | 0.1122272   | 0.1669387   |
| 0.2138734   | 0.04591218  | 0.03593014  | 0.2136483   | 0.1647720   | 0.07555599  |
| 0.04736567  | 0.1784209   | 0.1851577   | 0.07852737  | 0.1654038   | 0.09866955  |
| 0.05469237  | 0.2065865   | 0.04732301  | 0.1531682   | 0.07547443  | 0.1088339   |
| 0.08022602  | 0.06934972  | 0.04396857  | 0.05319912  | 0.09393526  | 0.1947402   |
| 0.2014717   | 0.1042968   | 0.1021550   | 0.07443603  | 0.1134859   | 0.07775977  |
| 0.4374191   | 0.1854242   | 0.05780179  | 0.06725271  | 0.06894722  | 0.07067661  |
| 0.1350812   | 0.07517231  | 0.1925274   | 0.3172394   | 0.2011642   | 0.1091664   |
| 0.194070099 | 0.1318891   | 0.05033817  | 0.07936211  | 0.1245765   | 0.3120453   |
| 0.077030968 | 0.181783554 | 0.1825760   | 0.228133652 | 0.2402652   | 0.07007388  |
| 0.6319080   | 0.09809689  | 0.1357325   | 0.1277733   | 0.1701358   | 0.2262764   |
| 0.1133785   | 0.1691704   | 0.07999003  | 0.047548328 | 0.1612166   | 0.2407706   |
| 0.1184219   | 0.1031008   | 0.3505922   | 0.17116     | 0.07089271  | 0.1498839   |
| 0.1236712   | 0.1813077   |             |             |             |             |
| AC040904.1  | 0.1327936   | 0           | 0.2304362   | 0.141915516 | 0           |
| 0.1173459   | 0           | 0.1262078   | 0           | 0           | 0.095184962 |
| 0.2949167   | 0.06434487  | 0.422859489 | 0           | 0.1393139   | 0.2891072   |
| 0.08592617  | 0.1406730   | 0.1380395   | 0.2229755   | 0           | 0.1676291   |
| 0           | 0.1119512   | 0.072267822 | 0           | 0.2660419   | 0.3426020   |
| 2.4413670   | 0.1584563   | 0.09555605  | 0.2584781   | 0           | 0           |
| 0.3251245   | 0.1858151   | 0.05627308  | 0           | 0.088110034 | 0           |
| 0.2054247   | 0.1425934   | 0.3230390   | 0.3842465   | 0.09697541  | 0           |
| 0.1054549   | 0.242533787 | 0           | 0.1501142   | 0           | 0.099800358 |
| 0.1632070   | 0.222993382 | 0.1231870   | 0.3429402   | 0.2022583   | 0.2271858   |
| 0.2028036   | 0           | 0.1055247   | 0.05638722  | 0           | 0.06300591  |
| 0.08339972  | 0           | 0           | 0.2477767   | 0.072204509 | 0.1507665   |
| 0.09441203  | 0.648897424 | 0.1318872   | 0.1112956   | 0.2770266   | 0.09834542  |
| 0.1365299   | 0.4135952   | 0.3632414   | 0           | 0           | 0           |
| 0.267446104 | 0.5836827   | 0.1191961   | 0           | 0           | 0.06647157  |
| 0.1044336   | 0           | 0           | 0.2510906   | 0.1134649   | 0.1561398   |
| 0.1894391   | 0.0601430   | 0.1864230   | 0.3254003   | 0.138136454 | 0.06519204  |

|             |             |             |             |             |             |             |             |
|-------------|-------------|-------------|-------------|-------------|-------------|-------------|-------------|
| 0.1546712   | 0.1489275   | 0           | 0.171030225 | 0.5255578   | 0           | 0.5086847   |             |
| 0.3348876   | 0           | 0.6036422   | 0.5561612   | 0           | 0.06362489  | 0.2880166   |             |
| 0.2005038   | 0.06694364  | 17.155550   | 0.1976989   | 0           | 0.1362999   | 0.2005402   |             |
| 0           | 0.118548406 | 0           | 0.1045228   | 0           | 0.1892853   | 0           | 0.1011744   |
| 0           | 0.4051264   | 0.181683749 | 0           | 0           | 0.4653674   | 0.2039808   | 0           |
| 0.07382879  | 0.0932420   | 0.122348963 | 0.3985382   | 0.3436936   | 0.9582664   |             |             |
| 0.09002534  | 0.1321099   | 0.3401960   | 0.08792652  | 0.1208019   | 0           | 0.1993824   |             |
| 0.1716335   | 0           | 0           | 0.1061394   | 0.1592137   | 0.5122970   | 0.5363850   | 0.1153381   |
| 0.276760844 | 0.1074193   | 0           | 0.1133319   | 0           | 0           | 0.2324456   | 0.167379681 |
| 0.6211599   | 0           | 0.1422836   | 0           | 0.2298304   | 0.9987365   | 0.3130784   |             |
| 0.2778377   | 0.3513877   | 0           | 0.1900902   | 0           | 0.4571472   | 0           | 0           |
| 0           | 0.156447675 | 0           | 1.8967770   | 0.092215211 | 0.297092798 | 0           | 0           |
| 0.1428111   | 0.348843862 | 0           | 0.07511492  | 0           | 0.377164009 | 0.1581977   | 0           |
| 0.2697572   | 0.2288724   | 0.4047978   | 0.3890488   | 0           | 0.07157426  | 0           | 0           |
| 0.06556514  | 0.581318434 | 0.8094312   | 0.092813017 | 0           | 0.06285088  | 0           |             |
| 0.2423088   | 0.1159316   | 0.1639786   | 0.3634942   | 0.1883020   | 0.1049645   |             |             |
| 0.255994449 | 0           | 0.1169811   | 0.05400856  | 0.1589126   | 0           | 0.08365845  | 0           |
| 0.1289864   | 0.1121713   | 0.1069102   | 0.3914793   | 0           | 0.2859883   | 0.160894832 |             |
| 0.1935407   | 0           | 0.08529357  | 0.06219207  | 0.1127224   | 0           | 0.4710623   |             |
| 0.07234837  | 0.2135094   | 0.3229560   | 0.28163773  | 0.116814394 | 0           | 0.1721682   |             |
| 0.3129011   | 0           | 0.2127784   | 0.0913805   | 0.1989666   | 0.4830896   | 0.3823236   |             |
| 0           | 0.3533472   | 0.06699492  | 0.5497350   | 0.1518548   | 0.1037106   | 0.2856741   |             |
| 0.2658537   | 0           | 0.2757403   | 0.09769217  | 0.3244887   | 0           | 0.9363658   |             |
| 0.1924610   | 0.8087943   | 0           | 0.2472335   | 0           | 0.06637045  | 0.430788795 | 0           |
| 0.4637324   | 0           | 0           | 0.1920133   | 0.190684248 | 0.05979358  | 0.0686049   |             |
| 0.2955025   | 0.5977087   | 0           | 0.4178662   | 0.087613525 | 0.08257921  | 0.09874847  |             |
| 0.08828224  | 0.3289439   | 0.360425761 | 0           | 0.5586925   | 0.4828610   | 0.122424364 |             |
| 0.096709354 | 0.09752443  | 0.0640980   | 0.3886267   | 0.1012969   | 0.1040445   |             |             |
| 0.1781814   | 0           | 0.08786597  | 0           | 1.2259      | 0.1842298   | 0.1672059   | 0.239288496 |
| 0.5081557   | 5.9239610   | 0.3489226   | 0.2122027   | 0.3589777   | 0.1776902   | 0           |             |
| 0.1459404   | 0           | 0.1204683   | 0.08123614  | 0           | 0.1331095   | 0           | 0.5980522   |
| 0.1140851   | 0           | 0.2499172   | 0.09936826  | 0.1621821   | 0.4666021   | 0.08114845  |             |
| 0.1170158   | 0.09775822  | 0           | 0.08036588  | 0.4861875   | 1.1446340   | 0.4853817   |             |
| 0.07515318  | 0           | 0           | 0.07160756  | 0           | 0.07106476  | 0.1355111   | 0.1303534   |
| 0.09604569  | 0.3277992   | 0           | 0.0922735   | 0.1763584   | 0.07231586  | 0.3016304   |             |
| 0           | 0           | 0.08675419  | 0           | 0.0651533   | 0.09200825  | 0.2901165   | 0           |
| 0.165644012 | 0           | 0.2022502   | 0.231657391 | 0.4879527   | 0.1067343   | 0           |             |
| 0.05783928  | 0.06528745  | 0.09731015  | 0.1636709   | 0.1292464   | 0.1351523   |             |             |
| 0.2441133   | 0.1720070   | 0.079008148 | 0.4911202   | 0           | 0.1082259   | 0.5798396   | 0           |
| 0.2979492   | 0.2727956   | 0.6848957   | 0           | 0           |             |             |             |
| AC008434.1  | 0.02696992  | 0           | 0.03120053  | 0           | 0           | 0.04409508  | 0.04231474  |
| 0           | 0.1537941   | 0           | 0.1095742   | 0.154653892 | 0.049501969 | 0           | 0.1695527   |
| 0           | 0.1306822   | 0           | 0.1402825   | 0.2546476   | 0           | 0.2197239   | 0.3490262   |
| 0.08571062  | 0.4766007   | 0.09057112  | 0           | 0.06808977  | 0.284189253 | 0.03164695  |             |

|             |             |             |             |             |            |             |             |
|-------------|-------------|-------------|-------------|-------------|------------|-------------|-------------|
| 0.3905795   | 0.1364214   | 0.088064067 | 0.1468371   | 0           | 0          | 0.1860639   | 0           |
| 0.03541666  | 0.06436386  | 0.2716994   | 0.05249601  | 0.5088367   | 0          | 0.08562766  |             |
| 0.08278101  | 0           | 0           | 0.1828619   | 0           | 0          | 0.03573614  | 0.2015162   |
| 0.02781403  | 0.1158409   | 0           | 0.1040522   | 0           | 0.04397636 | 0           | 0.1285052   |
| 0.197031091 | 0           | 0.2743890   | 0.07912374  | 0           | 0.04146425 | 0           | 0.06629354  |
| 0.181156737 | 0.07505658  | 0           | 0.2053898   | 0.04614066  | 0.1138429  | 0.05137581  |             |
| 0.2471322   | 0           | 0.1714537   | 0.0458082   | 0           | 0.02559256 | 0.1054540   | 0.2032583   |
| 0           | 0.07713451  | 0.0335484   | 0.029328972 | 0.06124033  | 0          | 0.2300971   |             |
| 0.065894411 | 0.3214301   | 0           | 0.05626314  | 0           | 0.02772876 | 0.0671998   | 0           |
| 0.07850933  | 0           | 0.03528715  | 0.178198122 | 1.4249720   | 0          | 0.2420831   |             |
| 0.0319557   | 0.05537729  | 0.4860053   | 0.05225813  | 0.08484042  | 0.1759168  |             |             |
| 0.07487861  | 0           | 0           | 0.06342292  | 0.2049340   | 0.5642917  | 0.1954374   |             |
| 0.04142897  | 0           | 0           | 0.056110072 | 0           | 0.06282637 | 0.03024667  | 0.0371759   |
| 0.07115931  | 0.09400775  | 0           | 0.03400725  | 0           | 0          | 0.0282386   | 0           |
| 0           | 0.08144327  | 0.05438409  | 1.3566930   | 0.1574864   | 0.04015195 | 0.05677869  |             |
| 0.05536408  | 0           | 0.1753138   | 0.192614167 | 0.06120171  | 0.04245645 | 0.034230997 |             |
| 0.07688637  | 0.07776282  | 0.04109632  | 0.3100884   | 0.04601547  | 0.08227977 | 0           |             |
| 0           | 0.0456312   | 0           | 0.6904633   | 0.07980916  | 0.03666994 | 0.08996624  | 0           |
| 0.1531431   | 0.099394603 | 0.05396115  | 0           | 0           | 0.07313534 | 0.08049321  | 0           |
| 0.1428606   | 0.09813782  | 0.06860799  | 0           | 0           | 0.08692761 | 0.03937331  | 0           |
| 0           | 0.04357517  | 0.4216457   | 0           | 0.2181649   | 0.1377650  | 0.06837819  |             |
| 0.04170699  | 0.1258904   | 0.033994234 | 0.1165247   | 0.08410361  | 0.0539585  |             |             |
| 0.3467678   | 0.157215462 | 0.04667776  | 0           | 0.2119504   | 0.08464182 | 0.1070484   |             |
| 0.1623409   | 0.03860666  | 0.06186259  | 0           | 0           | 0.3164459  | 0           | 0.1643465   |
| 0.254191851 | 0.11186668  | 0.1777980   | 0.112371542 | 0.080451359 | 0          | 0.0926546   |             |
| 0.2271849   | 0.1064270   | 0.02900445  | 0           | 0.1638459   | 0.03051116 | 0.09341848  |             |
| 0.051067137 | 0           | 0.06659742  | 0.2556715   | 0.0697248   | 0.1644260  | 0.1185217   |             |
| 0.07629206  | 0.05814594  | 0           | 0.02957225  | 0.1597926   | 0          | 0.06575707  |             |
| 0.075400011 | 0.05389079  | 0.2042367   | 0           | 0           | 0          | 0.1332140   | 0.04921627  |
| 0.03824349  | 0.08527175  | 0           | 0.1302655   | 0.09503386  | 0.08775161 | 0.06454918  |             |
| 0.03213906  | 0           | 0.08756227  | 0.04150538  | 0.02619669  | 1.5491490  | 0.08685233  |             |
| 0.03975404  | 0           | 0           | 0.130708734 | 0.1310248   | 0.07694018 | 0.03464566  |             |
| 0.02526199  | 0.2289352   | 0.04294709  | 0.03826845  | 0.08816223  | 0.1734521  |             |             |
| 0.1311825   | 0.30506479  | 0           | 0.2210805   | 0           | 0          | 0.4665929   | 0.04321457  |
| 0.07423625  | 0.1616377   | 0           | 0.1164729   | 0           | 0          | 0.08163862  | 0.08373696  |
| 0.02056079  | 0.04212655  | 0.1740582   | 0           | 0.105616828 | 0.0373346  | 0.03968188  |             |
| 0.1054441   | 0           | 0           | 0.2737722   | 0.05865153  | 0.2008491  | 0.1441549   |             |
| 0.4583067   | 0.087491713 | 0.04115476  | 0.2511532   | 0.1769936   | 0          | 0.03899724  |             |
| 0.129091036 | 0.04857548  | 0           | 0.2400622   | 0           | 0          | 0.2263125   | 0.071176015 |
| 0.1341724   | 0.2005547   | 0.07171927  | 0.1068918   | 0.02928049  | 0          | 0.1134685   |             |
| 0           | 0.198911718 | 0.157130681 | 0.07922749  | 0.07810849  | 0          | 0.0411461   |             |
| 0.2535729   | 0           | 0.1703449   | 0           | 0.0661196   | 0.04526839 | 0.02494428  |             |
| 0.3395895   | 0.03239911  | 0           | 1.09376     | 0.04724332  | 0.02873175 | 0           | 0.144353    |
| 0.1514981   | 0           | 0.1174972   | 0.1468002   | 0.09899267  | 0.07033241 | 0.2433067   |             |

|                    |                     |                             |                   |                    |                   |                   |   |
|--------------------|---------------------|-----------------------------|-------------------|--------------------|-------------------|-------------------|---|
| 0                  | 0.1457548           | 0.04634058                  | 0.1526173         | 0                  | 0.2421762         | 0.2195908         |   |
| 0.04738264         | 0.2307336           | 0.04753101                  | 0                 | 0.08581343         | 0.09793219        | 0.1481145         |   |
| 0                  | 0                   | 0.1221068                   | 0.1346682         | 0.2370126          | 0.05817299        | 0.03370263        |   |
| 0.02886601         | 0.05504369          | 0                           | 0.5851964         | 0                  | 0.05118923        | 0.2623660.2149067 |   |
| 0.05874841         | 0.1633602           | 0.04529452                  | 0.4716396         | 0                  | 0                 | 0.1587889         | 0 |
| 0.07856222         | 0.05780666          | 0.1430094                   | 0.067283451       | 0.142066871        | 0.04107632        |                   |   |
| 0.047048814        | 0.1486523           | 0.04335475                  | 0.6702204         | 0.1879513          | 0.05303862        |                   |   |
| 0.1581068          | 0.06648197          | 0                           | 0.07319723        | 0                  | 0.4192084         | 0.096277688       | 0 |
| 0.2078580.04396062 | 0.05888171          | 0.1430187                   | 0.1210249         | 0.05540383         |                   |                   |   |
| 0.03974284         | 0                   | 0.08974016                  |                   |                    |                   |                   |   |
| AP001469.2         | 0.1898268           | 0.2341302                   | 0.2635245         | 0.162293128        | 0.040092549       |                   |   |
| 0.1767410.1862169  | 0.2382646           | 0.0670978                   | 0.03298428        | 0.2164948          |                   |                   |   |
| 0.064683901        | 0.5013020.217705094 | 0.278734166                 | 0.2450833         | 0                  | 0                 | 0                 |   |
| 0.3311286          | 0.080596296         | 0.5924239                   | 0.4381244         | 0.4132751          | 0.3608542         |                   |   |
| 0.4421893          | 0.5228348           | 0.6709072                   | 0.2549925         | 0.052670609        | 0.1916989         |                   |   |
| 0.48006123         | 0.08909835          | 0.3498827                   | 0.3200656         | 0.08264474         | 0.6717796         |                   |   |
| 0.0760607          | 0.4897452           | 0.1309604                   | 0                 | 0.04985576         | 0.8154406         | 0.4371077         |   |
| 0.1477965          | 0.6139590.04766041  | 0.1205374                   | 0.7380245         | 0                  | 0.1062481         |                   |   |
| 0.4182966          | 0.3387873           | 0.352666059                 | 0.1197982         | 1.4588590.6240802  |                   |                   |   |
| 0.1957680.2446025  | 0.1231414           | 0.2197102                   | 0.2772502         | 0.1238104          |                   |                   |   |
| 0.1970574          | 0.5426872           | 0.277359152                 | 0                 | 0.7295933          | 0.6682913         | 0.171195999       |   |
| 0.6420579          | 0.1341685           | 1.07319                     | 0.382519417       | 0.5282829          | 0.1960914         |                   |   |
| 0.5782514          | 0.2598074           | 0.4807674                   | 0.07232133        | 0.8117342          | 0.1879777         |                   |   |
| 0.06033851         | 0.3224192           | 0.147472185                 | 0.3962910.4082285 | 0.4768753          |                   |                   |   |
| 0.05861836         | 0.5429083           | 0.6139357                   | 0.247717008       | 0.08620754         | 0.06826936        |                   |   |
| 0.3239059          | 0                   | 0.3016498                   | 0                 | 0.4752071          | 0.2811670.3903356 | 0.6621765         |   |
| 0.2769328          | 0.2210340.2592114   | 0.2483672                   | 0.167232084       | 4.7640650.05097477 |                   |                   |   |
| 0.2503101          | 0.4089343           | 0                           | 0.1559084         | 0.1140243          | 0.3678168         | 0.1791438         |   |
| 0.0619092          | 0.4743272           | 0.1435723                   | 0.5190293         | 0.3571198          | 0.1153936         |                   |   |
| 0.8808583          | 0.2527474           | 0.7909576                   | 0.2332770         | 0.9923318          | 0.63188573        |                   |   |
| 0.1118294          | 0.0442201           | 0.6812480.6803190.195588412 | 0.3005112         | 0.529336           |                   |                   |   |
| 0.3878178          | 0.2872305           | 0                           | 0.3451595         | 0.3577614          | 0.3451397         | 0.3274235         |   |
| 0.1646864          | 0.8025294           | 0.3445023                   | 4.5140870         | 0.0565216          | 0                 | 0.1169034         |   |
| 0.1146678          | 0.1233939           | 0.474497593                 | 0.1723064         | 0.2988281          | 1.01192092        |                   |   |
| 0.2705809          | 0.2189322           | 0.2314039                   | 0.05456363        | 0.6477562          | 0                 | 0.415543343       |   |
| 0.1308853          | 0.3211734           | 0.2660947                   | 0.6998111         | 0.4493870.36134    | 0.1899672         |                   |   |
| 0                  | 0.1293471           | 0.349792547                 | 0.2278821         | 0.1965223          | 0.8851207         | 0                 |   |
| 0.2266193          | 0.04863058          | 0.1508278                   | 0                 | 0.5794736          | 0.05700291        | 0.4906958         |   |
| 0.2202612          | 0.05542551          | 0.4855195                   | 0.04551877        | 0.2196966          | 0.3680426         |                   |   |
| 2.30824            | 0.211000575         | 0.4913744                   | 0.1939308         | 0.06480263         | 0.1443832         |                   |   |
| 0.1174212          | 0.3544298           | 0.095706843                 | 0.5467699         | 0.1775880.2278709  |                   |                   |   |
| 0.2440712          | 0.110655498         | 0.3613936                   | 0.2141522         | 0.2983610.5163151  |                   |                   |   |
| 0.5525347          | 0.1904384           | 0.2173852                   | 0.3483339         | 0.6534861          | 0                 | 1.527286          |   |
| 0.2046994          | 0.1156746           | 0.357823914                 | 0.157473864       | 0.5839979          | 0.158184555       |                   |   |

|             |             |             |             |             |             |             |             |           |   |
|-------------|-------------|-------------|-------------|-------------|-------------|-------------|-------------|-----------|---|
| 0.05662538  | 0.2158666   | 0.065214584 | 0.2665054   | 1.0487150   | 0.2858053   |             |             |           |   |
| 0.132978087 | 0.1537631   | 0.2147516   | 0.3068438   | 0.287547261 | 0.09045664  |             |             |           |   |
| 0.4687434   | 0.1542458   | 0.2290192   | 0.2314613   | 0.05561403  | 0.8591659   |             |             |           |   |
| 0.6138869   | 0.1715540   | 0.1665145   | 0.4123879   | 0.2215966   | 0.1851315   |             |             |           |   |
| 0.053070007 | 0.5689623   | 0.6109428   | 0.6953362   | 0.06927547  | 0.5303128   |             |             |           |   |
| 0.2344054   | 0.4849696   | 0           | 0.7802365   | 0.146376313 | 0.3667474   | 1.003338    |             |           |   |
| 0.4323454   | 0.4997596   | 0.09048381  | 0.04783547  | 0.4930430   | 0.8179752   |             |             |           |   |
| 0.1106307   | 0.5131120   | 0.1833920   | 0.05596146  | 0.09453427  | 0           | 0.2299971   |             |           |   |
| 0.1844426   | 0.3249243   | 0.04877043  | 0.4978555   | 1.0312650   | 0.1813689   |             |             |           |   |
| 0.1616106   | 0.5791580   | 0.3662508   | 0.1231097   | 0.16103901  | 0.400763227 |             |             |           |   |
| 0.2222953   | 0.09844488  | 0.1789152   | 0.6568193   | 0           | 0.0522509   | 0.1137681   |             |           |   |
| 0           | 1.1477060   | 0.4040843   | 0.5363029   | 0.4715035   | 0.3171721   | 0.6367518   |             |           |   |
| 0           | 0.2858572   | 0.2026850   | 0.346910659 | 0.4204450   | 0.5027390   | 0.0371082   | 0.06204913  |           |   |
| 0.1338523   | 0.05502409  | 0.5395418   | 0.4128166   | 0.5183451   | 0.2705677   |             |             |           |   |
| 0.9487571   | 0.164215216 | 0           | 0.4419330   | 0.1245763   | 0           | 0.1646884   | 0.181720459 |           |   |
| 0.2735173   | 0.2353676   | 1.1827680   | 0.2050601   | 0.07923307  | 0.2389338   | 0           |             |           |   |
| 0.2833102   | 0.8469580   | 0.4543140   | 0.2633238   | 0.329743363 | 0.3323133   | 0           |             |           |   |
| 0.06902436  | 0.350008118 | 0.552979129 | 0.2788198   | 0.6963672   | 0           | 0.5212894   |             |           |   |
| 0.3569526   | 0.1018832   | 0.2397932   | 0.2512066   | 0.2326901   | 0.06372396  |             |             |           |   |
| 0.4213665   | 0.4780375   | 0.136823935 | 0.1743365   | 8.3142580   | 0.1330081   |             |             |           |   |
| 0.2426728   | 0.0513154   | 0.2032047   | 0.2665784   | 0.1251720   | 0.4961996   |             |             |           |   |
| 0.4821821   | 0.2322520   | 0.4947236   | 0.2036985   | 0.4103558   | 0.09784993  |             |             |           |   |
| 0.3007735   | 0.1429014   | 1.8750030   | 0.7109675   | 0           | 0.5104029   | 0.06690903  |             |           |   |
| 0.05589765  | 0.1207989   | 0.3216696   | 0.1389998   | 0.0654496   | 0           | 0.1718888   |             |           |   |
| 0.6634999   | 0.6672816   | 0.2866139   | 0.1897717   | 0.2438068   | 0.2324537   |             |             |           |   |
| 0.2236062   | 0.7688581   | 0.4685847   | 0           | 0.6331382   | 0.1512613   | 0.3307987   |             |           |   |
| 0.2874512   | 0.06376075  | 0.5532696   | 0.6448728   | 0           | 0.2607803   | 0.1052197   |             |           |   |
| 0.3317743   | 0           | 0.2818384   | 0.094714397 | 0.349976273 | 0.05782281  | 0           |             |           |   |
| 0.2790089   | 0.3051508   | 0           | 0.5952996   | 0.03733103  | 0.05564145  | 0.1403792   |             |           |   |
| 0           | 0.1287990   | 0.2326379   | 0.2950582   | 0.135529361 | 0.07020501  | 1.111881    |             |           |   |
| 0.1856491   | 0.1657747   | 0.3623873   | 0.4259145   | 0.6239324   | 1.118914    |             |             |           |   |
| 0.06154871  | 0.547415    |             |             |             |             |             |             |           |   |
| AC011510.1  | 0           | 0.1064228   | 0.1197838   | 0.331963217 | 0.109343315 | 0.5623577   |             |           |   |
| 0.2539322   | 0.2436797   | 0.0914970   | 0.08995712  | 0           | 0.352821278 | 0.3155048   |             |           |   |
| 0.148435291 | 0           | 1.5874710   | 0           | 0.05748813  | 0           | 0           | 0.1086259   | 0         |   |
| 0.07029628  | 0.4019903   | 0           | 0.05381609  | 0           | 0.143647114 | 0           | 0.054552413 | 0         |   |
| 0.06815897  | 0.1745812   | 0           | 0.07046639  | 0           | 0           | 0.7143293   | 0.0857344   | 0         |   |
| 0.1235516   | 0.07450699  | 0.7053922   | 0.06976807  | 0.2599659   | 0           | 0           |             |           |   |
| 0.1267531   | 0           | 0.04387726  | 0.1847930   | 0           | 0.06859839  | 0           | 0           | 0.1667745 |   |
| 0.08396003  | 0           | 0.07561369  | 0           | 0           | 0           | 0.4337304   | 0           | 0.2278266 |   |
| 0.155632726 | 0           | 0           | 0.347744925 | 1.0565660   | 0.1577049   | 0.0885707   | 0           |           |   |
| 0           | 0           | 0.1281666   | 0.2468393   | 0.04396626  | 0           | 0           | 0.05060684  | 0.1300569 |   |
| 0           | 0           | 0           | 0.05629932  | 0.05877787  | 0           | 0.07361497  | 0           | 0.1028352 | 0 |
| 0           | 0           | 0.1289954   | 0           | 0           | 0           | 0.285054688 | 3.2482260   | 0         | 0 |



|            |             |             |             |             |             |             |             |             |             |             |   |           |
|------------|-------------|-------------|-------------|-------------|-------------|-------------|-------------|-------------|-------------|-------------|---|-----------|
| 0          | 0           | 0           | 0           | 0           | 0.5220811   | 0           | 0           | 0           | 0.08007803  | 0           | 0 | 0.2385787 |
| 0          | 0           | 0.107707795 | 0.05083156  | 0           | 0.05806091  | 0           | 0           | 0.1365960   | 0.1804554   |             |   |           |
| 0          | 0           | 0           | 0           | 0           | 0           | 0.04960961  | 0           | 0.07816845  | 0           | 11.364130   | 0 |           |
| 0.5449563  | 0           | 0           | 0.08413221  | 0           | 0           | 0.08149858  | 0.525673205 | 0.07379479  |             |             |   |           |
| 0          | 0           | 0           | 0           | 0           | 0           | 0           | 0           | 0.1407818   | 0.1151316   | 0           |   |           |
| 0.05879412 | 0.095397967 | 0.1035828   | 0           | 0.1724261   | 0           | 0.05150439  | 0           |             |             |             |   |           |
| 0.06855809 | 0           | 0           | 0.3109250   | 0.06674581  | 0           | 0.08275901  | 0.1862132   | 0           |             |             |   |           |
| 0          | 0           | 0.071932014 | 0.0837570   | 0           | 0.06562872  | 0           | 0           | 0.130509332 |             |             |   |           |
| 0.3727977  | 0           | 0.05178884  | 0.1109414   | 0           | 0.1344026   | 0.2920257   | 0           | 0           |             |             |   |           |
| 0          | 0           | 0           | 0.1187502   | 0           | 0           | 0           | 0           | 0.24397085  | 0.107368544 |             |   |           |
| 0.1137658  | 0.07190207  | 0           | 0           | 0           | 0.1453666   | 0.4085905   | 0           | 0           |             |             |   |           |
| 0.4193539  | 0           | 0           | 0           | 0           | 0           | 0.9815107   | 0.1052097   | 0.1516746   | 0           |             |   |           |
| 0.1674237  | 0.3509060   | 0.05112247  | 0.075544295 | 0           | 0.144736384 | 0.05172385  |             |             |             |             |   |           |
| 0          | 0.05267699  | 0           | 0           | 0.06392873  | 0.09447459  | 0           | 0           | 0           | 0.06251376  | 0           |   |           |
| 0          | 0           | 0           | 0           | 0           | 0           | 0.2514333   | 0           | 0           | 0.07631108  | 0           | 0 | 0         |
| 0.1006051  | 0           | 0           | 0.04849242  | 0           | 0           | 0           | 0           | 0.08323882  | 0           | 0           | 0 | 0         |
| 0          | 0.08132511  | 0.07463856  | 0           | 0.1425025   | 0.3490612   | 0           | 0.3726318   | 0           |             |             |   |           |
| 0.09183734 | 0.0522373   | 0           | 0.1441691   | 0.03946809  | 0.0808653   | 0           |             |             |             |             |   |           |
| 0.2763887  | 0.540639988 | 0.07166677  | 0           | 0.05060209  | 0           | 0           | 0           | 0           | 0           | 0           |   |           |
| 0.1285153  | 0           | 0           | 0           | 0           | 0.1205272   | 0.3397535   | 0.1331074   | 0           |             |             |   |           |
| 0.09912025 | 0.6060895   | 0           | 0           | 0.2796274   | 0.2701127   | 0           | 0           | 0           |             |             |   |           |
| 0.1539924  | 0           | 0.05129685  | 0.11241251  | 0.3398659   | 0.2178119   | 0.09412412  |             |             |             |             |   |           |
| 0          | 0.226218735 | 0.07604177  | 0           | 0           | 0           | 0           | 0           | 0           | 0.5711485   | 0           | 0 |           |
| 0          | 0           | 0           | 3.0793550   | 0.09068735  | 0           | 0           | 0.2078230   | 0           | 0           | 0           | 0 | 0         |
| 0.05189408 | 0           | 0           | 0.1779090   | 0           | 0.3099178   | 0.08430445  | 0           | 0.06327309  |             |             |   |           |
| 0          | 0           | 0           | 0.0626629   | 0           | 0           | 0.1261540   | 0.1171969   | 0           | 0.09099295  |             |   |           |
| 0.05583387 | 0           | 0           | 0.2113216   | 0.1016392   | 0           | 0           | 0           | 0           | 0.6875512   | 0           |   |           |
| 0          | 0           | 0           | 0.0676440   | 0.2032054   | 0           | 0           | 0           | 0.05490359  | 0           | 0.818126352 |   |           |
| 0.07884929 | 0.090313983 | 0           | 0           | 1.2865420   | 0.09019691  | 0.1018119   | 0.0758747   |             |             |             |   |           |
| 0.1914262  | 0           | 0.03512699  | 0.3172334   | 0           | 0           | 0           | 0.07980005  | 0           |             |             |   |           |
| 0.1130282  | 0.2745358   | 0           | 0           | 0.07628958  | 0.08393006  | 0.1722635   |             |             |             |             |   |           |
| AC012568.1 | 0.1882181   | 0           | 0.1814522   | 0           | 0.099381954 | 0.4381080   | 0.1025771   |             |             |             |   |           |
| 0.04921779 | 0           | 0           | 0.05962782  | 0           | 0.1911745   | 0.044970862 | 0           | 0.4556368   |             |             |   |           |
| 0.04930319 | 0           | 0.7663460   | 0.03040022  | 0.066594397 | 0           | 0.03290996  | 0.06829546  |             |             |             |   |           |
| 0.08518955 | 0.04059648  | 0           | 0.0326089   | 0           | 0           | 0           | 0           | 0.1104291   |             |             |   |           |
| 0.1238991  | 0.1057844   | 0.034143484 | 0           | 0.06284677  | 0           | 0           | 0           | 0           |             |             |   |           |
| 0.0748639  | 0           | 0.06105998  | 0           | 0           | 0           | 0.07680376  | 0           | 0           | 0           | 0           | 0 | 0         |
| 0.04156597 | 0.1875125   | 0.03235149  | 0           | 0.4069927   | 0.1210268   | 0.09163354  |             |             |             |             |   |           |
| 0.1023009  | 0           | 0           | 0.057293469 | 0           | 0.2482290   | 0.04601582  | 0           | 0           | 0           | 0           | 0 | 0         |
| 0          | 0           | 0.04777925  | 0           | 0.04413825  | 0           | 0.04790804  | 0           | 0           | 0           | 0           | 0 | 0         |
| 0          | 0.09686932  | 0           | 0           | 0.102340713 | 0           | 0           | 0           | 0.076644134 | 0.1246223   | 0           |   |           |
| 0          | 0.04646405  | 0.0322523   | 0           | 0.0572054   | 0           | 0           | 0           | 0           | 11.0841     | 0           | 0 | 0         |
| 0.1689453  | 0           | 0           | 0           | 0           | 0           | 0.04354699  | 0.03954322  | 0           | 0           |             |   |           |
| 0.04767321 | 0           | 0           | 0.02841502  | 0.3373126   | 0           | 0           | 0           | 0           | 0.2192267   | 0           |   |           |

0 0 0 0.05467188 0 0 0 0 0 0 0.03006006 0.3628684 0  
0.03162804 27.973950 0 0.06604131 0 0 0 0 0 0 0.119445871  
0 0 0.0956012 0 0.1070445 0.09570253 0 0.05407339 0 0 0  
0 0 0 0 0 0 0.06276414 0 0.03482618 0 0.03120817 0  
0.4569571 0 0 0.04709987 0 0 0 0 0.03761085 0 0  
0.05449235 0.043585924 0 0 0 0 0 0.03660689 0 0 0.04891195  
0 0 0 0 0 0.09861084 0.1640832 0.04150395 0.1258830.04490478  
0.02398486 0 0 0.05258135 0.03382744 0 0 0 0.06893438 0 0  
0 0.053884931 0 0 0.0337361 0.054937981 0.12705 0.07097724  
0.1086584 0 0.1494834 0 0 0.02703313 0 0 0 0.06763161  
0.07087508 0.03439654 0 0 0 0 0.06268229 0 0 0 0  
0.07747296 0.1144904 0.04448237 0.1487739 0 0 0 0.05103351 0  
0.1121462 0.03952507 0.0509234 0.04827638 0.06094061 0.1059924 0  
0 0 0 0 0.03047993 0 0 0 0 0 0 0.1025446 0 0  
0.044353964 0 0.03673524 0 0 0 0.0502644 0.04317341 0  
0.09129574 1.6256850 0.1112944 0 0 0.1747135 0.02391499 0 0  
0 0 0 0 0 0 0 0.09092965 1.4647970 0.1946789 0  
0.03135723 0.033921575 0 0.0730313 0 0.04032702 0.04535908 0  
0.1412497 0 0.03490311 0 0.16367 0 0 0 0.04665447 0 0  
0.10217154 0.06864523 0 0 0 0.091382144 0 0.03028359 0.1377072  
0 0.1474698 0 0.09906709 0 0.07690606 0.2106131 0.1160543  
0.03949886 0 0 33.840280.1099008 0 0 0.08395109 0.08810643 0  
0 0 0 0.08180613 0 0 0.1130217 0 0.03550292 0 0.1408419  
0 0 0 0 0 0.04990633 0 0 0 0.1528815 0.1065201  
0.1174780.2756778 0 0 0 0.06402327 0 0.04537752 0 0  
0.04359532 0 0 0 0.3161020 0 0.067036417 0 0 0 0.1344740  
0 0 0 0 0 0 1.5591150 0.06169111 0.09194985 0 0  
0.04256915 0 0.1218991 0 0 0 0 0 0.03327002 0 0 0 0  
0.06958665

MKNK1-AS1 0.1332281 0.03734593 0.0560461 0.012943624 0.025580522  
0.1597536 0.01980221 0.07601078 0.03210815 0.01052259 0.1035988  
0.020635355 0.2275850.043407457 0.055575831 0.1661454 0.04758917 0 0  
0.1232421 0.038567553 0.1469954 0.1778888 0.1054739 0.1973471  
0.09404435 0.0128303 0.1888515 0.1423578 0.033605787 0.08408878  
0.114861276 0.007106003 0.1754013 0.1531602 0.013182597 0.107155  
0.02426476 0.1718615 0.2088938 0.04011458 0.03180981 0.1300703  
0.1045840.1768117 0.1550592 0.02280682 0.03845365 0.08674231  
0.0741337 0.1440542 0.05132473 0 0.09643454 0.05732674 0.256774  
0.3438880.08118967 0.1235518 0.03928437 0.1518651 0.09729271  
0.03949779 0.1362074 0.1635090.121663677 0 0.3012107 0.1065986  
0.054614674 0.1396557 0.1070055 0.1041988 0.122030734 0.1629142  
0.02085226 0.05534185 0.1968479 0.1448529 0.0692155 0.1294791  
0.08995252 0.07699638 0.005142883 0 0.0229862 0.09471448 0.1673452  
0.009350167 0.04041281 0.07532954 0.046098666 0.06187903 0.01633439

|             |             |             |             |             |             |
|-------------|-------------|-------------|-------------|-------------|-------------|
| 0.2583299   | 0.029591846 | 0.08420285  | 0.01015088  | 0.2273997   | 0.02690924  |
| 0.01245242  | 0.0452671   | 0.08834666  | 0.2027275   | 0.0964754   | 0.09508046  |
| 0.14671281  | 1.7397990   | 0.04878567  | 0           | 0.2500437   | 0.1219806   |
| 0.1879419   | 0.08213824  | 0.009525029 | 0.01975017  | 0.1260993   | 0.08397072  |
| 0.1034874   | 0.02848195  | 0.1012349   | 0.09367     | 0.1094279   | 0.2029611   |
| 0.03720982  | 0           | 0.04946439  | 0.251978972 | 0.02972971  | 0.1763378   |
| 0.05843231  | 0.077995379 | 0.1597810   | 0.0949882   | 0.1237210   | 0.08399583  |
| 0.08258418  | 0.06340692  | 0.07707415  | 0.1044541   | 0.01751267  | 0.07314905  |
| 0.03663419  | 4.5833210   | 0.04507857  | 0.0637454   | 0.006215721 | 0.02743586  |
| 0.054061952 | 0.04122667  | 0.1525307   | 0.053803566 | 0.1035843   | 0.1920694   |
| 0.04613882  | 0.1305510   | 0.08265846  | 0.09237545  | 0.149136721 | 0.08350966  |
| 0.09221421  | 0.04244455  | 0.1984468   | 0.04480085  | 0.06587092  | 0.3366835   |
| 0.008504281 | 0.1031602   | 0.078113182 | 0.1211643   | 0.04179614  | 0.08740017  |
| 0.0656872   | 0.1506161   | 0.02327107  | 0.1684090   | 0.2974840   | 0.0539183   |
| 0.07044345  | 0.1210160   | 0.008840879 | 0.03872242  | 0.05808531  | 0.05840604  |
| 0.02935309  | 0.2945484   | 0.033656533 | 0.1665548   | 0.05413406  | 0.06201969  |
| 0.1458595   | 0.04682441  | 0.1978719   | 0.061064489 | 0.06977187  | 0.01888461  |
| 0.05452126  | 0.05190879  | 0.01765057  | 0.06812662  | 0.04554565  | 0.09518265  |
| 0.06335155  | 0.2003054   | 0.09113001  | 0.06934988  | 0.05093226  | 0.2084741   |
| 0.03893863  | 0.1725615   | 0.05877258  | 0.0645791   | 0.114152414 | 0.087914857 |
| 0.1863061   | 0.050463784 | 0.018064538 | 0.01721635  | 0.114425588 | 0.1105262   |
| 0.09558844  | 0.1042025   | 0.042422457 | 0.2452663   | 0.08906264  | 0.1538253   |
| 0.194932346 | 0.07214333  | 0.08972265  | 0.04920725  | 0.09915466  | 0.06153367  |
| 0.09758045  | 0.1199143   | 0.1697291   | 0           | 0.0398409   | 0.1076395   |
| 0.05906034  | 0.101581855 | 0.03025158  | 0.2522261   | 0.1170743   | 0.01105007  |
| 0.02114744  | 0.1121694   | 0.2210203   | 0.00858719  | 0.2776302   | 0.108959055 |
| 0.1608739   | 0.09602501  | 0.08866681  | 0.1014571   | 0.0288660   | 0.03815099  |
| 0.05898367  | 0.08387652  | 0.1117618   | 0.3683074   | 0.05850544  | 0.0267791   |
| 0.01507909  | 0.008694667 | 0.080710639 | 0.1000290   | 0.1209330   | 0.1089106   |
| 0.1747773   | 0.04821668  | 0.03437117  | 0.01319729  | 0.9055158   | 0.1669157   |
| 0.145560823 | 0.031962711 | 0.04254977  | 0.1570286   | 0.02853863  | 0.3055754   |
| 0.03881357  | 0           | 0.04536764  | 0.05287312  | 0.3574217   | 0.01744208  |
| 0.0244415   | 0.1002789   | 0.2023675   | 0.1662018   | 0.04729545  | 0.06513836  |
| 0.04041266  | 0.102765822 | 0.1760452   | 0.07128132  | 0.0177573   | 0.01979481  |
| 0.02633055  | 0.3565421   | 0           | 0.08268082  | 0.1510531   | 0.2058163   |
| 0.02772266  | 0.09868934  | 0.07948425  | 0.03114005  | 0.05253862  | 0.150727644 |
| 0.09271062  | 0.01251443  | 0.2762556   | 0.04361196  | 0.03159601  | 0.1651526   |
| 1.094756979 | 0.09038117  | 0.1711236   | 0.03220767  | 0.03600221  | 0.085470289 |
| 0.02650352  | 0           | 0.03303006  | 0.200986257 | 0.149948942 | 0.01778973  |
| 0.04430662  | 0.02771682  | 0.1992803   | 0           | 0.2199330   | 0.1282232   |
| 0.4065823   | 0.06161085  | 0.1601279   | 0.043649353 | 0.05561655  | 2.374063    |
| 0.1060801   | 0.1161256   | 0.04911167  | 0.07292929  | 0.1105564   | 0.01996608  |
| 0.1319140   | 0.2197499   | 0.09632048  | 0.04737729  | 0.07891296  | 0.06498356  |
| 0.2181851   | 0.04162124  | 0.1439284   | 0.03419112  | 0.3987735   | 0.07396035  |

|             |             |             |             |             |             |             |            |
|-------------|-------------|-------------|-------------|-------------|-------------|-------------|------------|
| 0.03191788  | 0.02960508  | 0.06403564  | 0.01783238  | 0.06743988  | 0.1099484   |             |            |
| 0.07760109  | 0.01043981  | 0.02951333  | 0.1439437   | 0.1436323   | 0.1383688   |             |            |
| 0.03265539  | 0.01513517  | 0.006481571 | 0.1977520   | 0.2615598   | 0.2014799   |             |            |
| 0.02989743  | 0.01149402  | 0.3366379   | 0.1045528   | 0.0659568   | 0.2475960   |             |            |
| 0.1412025   | 0.0949506   | 0.051764726 | 0.08319371  | 0.1007011   | 0.1234825   | 0           |            |
| 0.01284452  | 0.098200816 | 0.063799356 | 0.04611635  | 0.095079015 | 0.01112612  |             |            |
| 0.05840923  | 0.4514736   | 0.1899115   | 0.1071836   | 0.06212726  | 0.09703104  |             |            |
| 0.03536436  | 0.05341602  | 0.05195103  | 0.2745429   | 0.072060601 | 0           | 0.4013828   |            |
| 0.03948365  | 0.02644258  | 0.3275566   | 0.1902244   | 0.1119633   | 0.3123348   |             |            |
| 0.01963517  | 0.1746355   |             |             |             |             |             |            |
| C1QTNF7-AS1 | 0.2775196   | 0.1677890   | 0.1321980   | 0.593166174 | 0.206872248 | 0.3039867   |            |
| 0.1067616   | 0.1024511   | 0.08655394  | 0.5814979   | 0.1861808   | 0.055626728 |             |            |
| 0.1160677   | 0.257429673 | 0.179778928 | 0.1053831   | 0.05131445  | 0.06274926  |             |            |
| 0.1087647   | 0.2689431   | 0.034655519 | 0           | 0.01712624  | 0.03554074  | 0           | 0          |
| 0.1037599   | 0.06787828  | 0.05482199  | 0           | 0.1236426   | 0           | 0.09577827  |            |
| 0.02149224  | 0           | 0.159913472 | 0.0666595   | 0           | 0           | 0.1689345   | 0          |
| 0.07791788  | 0.1644575   | 0           | 0           | 0.2664148   | 0.05182975  | 0.01670223  | 0          |
| 0.04568552  | 0.02767122  | 0.02913496  | 0.021663217 | 0.2575595   | 0.08652322  |             |            |
| 0.04879047  | 0.2020274   | 0.0876470   | 0.02647472  | 0.03149098  | 0.04768581  |             |            |
| 0.05323709  | 0.1129767   | 0           | 0.149076721 | 0.05470646  | 0.09226973  | 0.04789298  |            |
| 0.024537464 | 0.1505879   | 0           | 0           | 0           | 0.1211498   | 0.05621144  | 0.3232342  |
| 0.1396429   | 0.02296941  | 0           | 0.07479359  | 0           | 0.02594489  | 0.2911371   |            |
| 0.031705707 | 0.1084368   | 0.01595761  | 0.1025256   | 0           | 1.0115930   | 0.071010388 |            |
| 0.03706829  | 0.04403261  | 0.09285064  | 0.199426855 | 0.2594122   | 0.02736374  | 0           |            |
| 0.02417975  | 0           | 0.1220265   | 0.08930853  | 0.1900843   | 0.01857634  | 0.0640771   |            |
| 0.035953976 | 2.4797570   | 0.109592946 | 0           | 0           | 0.01934253  | 0.06703889  | 0.08171533 |
| 0.09489431  | 0.02567662  | 0           | 0           | 0.06173451  | 0.08369133  | 0.07677879  |            |
| 0.09923596  | 0.02525062  | 0.1242041   | 0.04436126  | 0.05015326  | 1.420884    |             |            |
| 0.02666823  | 0           | 0           | 0.07605662  | 0.03661614  | 0.02250228  | 0.126151291 |            |
| 0.1507526   | 0.02845108  | 0.04168934  | 0.02058433  | 0           | 0           | 0.1025556   | 0          |
| 0.06257266  | 0.0472089   | 0.2957818   | 0.03291826  | 18.327590   | 0.09532528  |             |            |
| 0.04860733  | 0           | 0.05026716  | 0           | 0           | 0           | 0.03704492  | 0.07709568 |
| 0.04653872  | 0.04706923  | 0.1243764   | 0.02346176  | 0.0278528   | 0           | 0.022334882 |            |
| 0.02813962  | 0           | 0.02860445  | 0.01671728  | 0.04830786  | 0.06658809  | 0.01815195  |            |
| 0.04584998  | 0.05561781  | 0.030081388 | 0.2286358   | 0           | 0           | 0.06640237  | 0          |
| 0.08364245  | 0.0216181   | 0.02970103  | 0.04152788  | 0.04902125  | 0.06329814  |             |            |
| 0.09470988  | 0.07149707  | 0           | 0.03914514  | 0           | 0           | 0.02835765  | 0.02268198 |
| 0.0264107   | 0.08338811  | 0           | 0.02069439  | 0.2272042   | 0.2286014   | 0.185187993 |            |
| 0.0235105   | 0           | 0.01633033  | 0           | 0           | 0.08476104  | 0           | 0.05131678 |
| 0.04319706  | 0.04913183  | 0.04673662  | 0.02496329  | 0.08429755  | 0.03498895  |             |            |
| 0.08208952  | 0.1408295   | 0           | 0           | 0.084640032 | 0.03587324  | 0.022672538 |            |
| 0.024348289 | 0.3944861   | 0           | 0.02291888  | 0.4831458   | 0.03511233  | 0.085768667 |            |
| 0           | 0.03693633  | 0           | 0.092731614 | 0.07779072  | 0.1612436   | 0.0221080   | 0          |
| 0.1673939   | 0           | 0.1407811   | 0.03688317  | 0.1610987   | 0.06448082  | 0.023821024 |            |

|             |             |              |             |             |             |             |
|-------------|-------------|--------------|-------------|-------------|-------------|-------------|
| 0.03980224  | 0           | 0.1794082    | 0.04635859  | 0.03322077  | 0.2383015   | 0.02850358  |
| 0.1007917   | 0.05958045  | 0.09259395   | 0           | 0.062940201 | 0.01971217  | 0.02876162  |
| 0.02655768  | 0.9181712   | 0            | 0           | 0.05300076  | 0           | 0.07928327  |
| 0.09625124  | 0.0406487   | 0.02343821   | 0           | 0           | 0.04657129  | 0.04194149  |
| 0.01529088  | 0.2217163   | 0            | 0.06949078  | 0           | 0.0262473   | 0           |
| 0.028720628 | 0.2485197   | 0.04233021   | 0.1795070   | 0.1412125   | 0.05231488  |             |
| 0.1797385   | 0.09783804  | 0.07126503   | 0.3055006   | 0.3291303   | 0.08687589  |             |
| 0.1811891   | 0.1520560   | 0.09092034   | 0.01244529  | 0.02549887  | 0.0702374   |             |
| 0.02178808  | 0.127858079 | 0.1129917    | 0.02401913  | 0.06382446  | 0.08004132  | 0           |
| 0.09463902  | 0.3645668   | 0.07100263   | 0.1013103   | 0.1745117   | 0.09790922  |             |
| 0.017652683 | 0.2740172   | 0            | 0.2678321   | 0.02098606  | 0.0944189   | 0.093765352 |
| 0.07350589  | 0.1012055   | 0.4722502    | 0           | 0.03406935  | 0.2739704   | 0.064623427 |
| 0.04060676  | 0.2913461   | 0.06511667   | 0.06470077  | 0.070893005 | 0.7859008   |             |
| 0.0686816   | 0.08903914  | 0.030099926  | 0           | 0.02397789  | 0.6461389   | 0.04777495  |
| 0.1743379   | 0.02558095  | 0            | 0.3351023   | 0.02160321  | 0.02001084  | 0.137003    |
| 0.03019716  | 0.06166526  | 0.039221856  | 0           | 2.1185420   | 0.03478221  | 0.1765204   |
| 0.04368789  | 0.02292516  | 0            | 0           | 0.2665710   | 0           | 0.03272703  |
| 0.02940808  | 0.05609919  | 0.01847561   | 0           | 0.02443122  | 0.4784998   | 0.05736068  |
| 0.1197096   | 0.02877015  | 0.02403537   | 0.1558266   | 0.0197592   | 0           | 0.0281426   |
| 0.1591182   | 0.05543272  | 0.0611352    | 0           | 0.08802914  | 0.1019997   | 0.05241712  |
| 0.06663503  | 0.1281976   | 0.07084296   | 0.02014863  | 0.03098444  | 0.2722424   |             |
| 0.1951220   | 0.3911595   | 0.02472017   | 1.6724020   | 0.09515992  | 0           | 0           |
| 0           | 0           | 0.06924996   | 0           | 0.107489956 | 0.02486317  | 0.113913116 |
| 0.07872688  | 2.8397540   | 0.02844136   | 0.01605193  | 0           | 0.04024101  | 0           |
| 0.02000634  | 0.1268718   | 0.097126885  | 0           | 0.02516297  | 0.1862631   | 0.03564064  |
| 0           | 0.05494157  | 0            | 0.02405603  | 0.02646527  | 0.07242535  |             |
| ADAMTS9-AS1 | 0.6988816   | 7.0693920    | 0.1528283   | 6.544390402 | 0.733539597 |             |
| 0.6712037   | 5.3021845   | 9.95061410   | 5.365512    | 2.104       | 0.9315291   | 1.364980175 |
| 1.7594991   | 5.91433947  | 10.176063367 | 2.4208541   | 3.261410    | 7.698772    | 0.2105775   |
| 0.006194663 | 0.022616603 | 0.03694302   | 0.05588395  | 0           | 0.1764842   | 0.2095664   |
| 0.03160032  | 0.01328945  | 0.03577748   | 0.065032929 | 1.1780830   | 1.18996326  |             |
| 0.01250121  | 0.008415657 | 0.1472974    | 0.020872286 | 0.2494159   | 0.03415015  |             |
| 0.08245818  | 0.3895454   | 0.03175714   | 0.002798064 | 0.1423804   | 0.5182358   |             |
| 0.01658962  | 0           | 0.01069941   | 0.01691236  | 0.002180015 | 0.2034543   | 0.01490746  |
| 0.0126410   | 0.04943593  | 0.005655069  | 0.01008518  | 0.01693982  | 0.0127365   |             |
| 0.002197425 | 0.09609511  | 0.8466080    | 0.1931831   | 0.1338174   | 0.07296064  |             |
| 0.02949197  | 0.003384148 | 0.023349418  | 0.1106765   | 0           | 0.006251105 | 0.233796234 |
| 0.003275849 | 0           | 0.002618733  | 0.064404622 | 0.01185957  | 0.05135796  | 0.01298132  |
| 0.007290609 | 0.3177903   | 0            | 0.1204009   | 0.03164972  | 0.1185236   | 0.2406661   |
| 0.012414913 | 0.0101096   | 0.01249695   | 0.01605826  | 0.01644924  | 0.07109607  |             |
| 0.01060185  | 0.03939089  | 0            | 0.01149448  | 0.009089315 | 0.020823734 | 0.04655625  |
| 0.1178621   | 0.07556539  | 0.03155998   | 0.002190687 | 0.5468336   | 0.05051264  |             |
| 0.02170898  | 0.009698512 | 0.08363496   | 0.009385597 | 1.7942230   | 0.025747797 |             |
| 0.07024099  | 0.01912558  | 0.3433502    | 0.008750075 | 0.01706509  | 0.03715749  |             |

|             |             |             |             |             |             |               |
|-------------|-------------|-------------|-------------|-------------|-------------|---------------|
| 0.08043297  | 0           | 0.01774717  | 0.4028867   | 0.01092359  | 0.01002135  | 0.006476257   |
| 0.03295772  | 0.05876639  | 0.01351032  | 0.4058596   | 0           | 2.7916030   | 0.031030509 0 |
| 0.06204431  | 0.1385975   | 0.4288095   | 0.07683931  | 0.008432823 | 0.2339507   |               |
| 0.03808974  | 0.002686715 | 0.05128573  | 0.04842863  | 0.004461935 | 0.02711848  |               |
| 0.0122507   | 0.01848545  | 0.006434358 | 0.04081742  | 1.9780390   | 0.01244208  |               |
| 0.01268869  | 0.4710041   | 0.01093498  | 0.04504867  | 0.04501418  | 0.003804331 |               |
| 0.01450557  | 0.1341695   | 0.013521958 | 0.009111516 | 0.0491487   | 0.01298712  |               |
| 0.6645158   | 0.03635414  | 0.01300089  | 0.020406413 | 0           | 0.01081517  | 0.007467041   |
| 0.002181979 | 0.0220684   | 0.3157816   | 0.03080007  | 0.02094557  | 0.5638109   |               |
| 0.003926294 | 0.05968419  | 0.003676485 | 0.01419308  | 0.01155599  | 0.02755696  |               |
| 0.09006699  | 0.02821645  | 0.007753297 | 0.4336254   | 0.05438614  | 0.3029335   |               |
| 4.3540860   | 0.0777664   | 0.006812225 | 0.3014497   | 0.01233007  | 0.00344262  |               |
| 0.03331177  | 0.032565566 | 0.3722962   | 0.01904702  | 0.05819087  | 0.01350541  |               |
| 0.2998474   | 0.03729699  | 0.013428432 | 0.009205941 | 0.01328907  | 0           | 0.05022618    |
| 4.719857484 | 0.09219344  | 0.1842898   | 0.07702686  | 0.01337411  | 0.008457274 |               |
| 0.01710081  | 0           | 0.09611892  | 0.007335144 | 0.2329089   | 0.01071452  | 0.04135817    |
| 0.01947609  | 0.025102771 | 0.004418967 | 0.00468226  | 0.035511283 | 0.025423972 |               |
| 0.5027775   | 0.01830025  | 0.005982853 | 1.89184     | 0.009165889 | 0.018657884 |               |
| 0.008629675 | 0.009642036 | 0.00246015  | 0.004034517 | 0.08630415  | 0.01052295  |               |
| 0.3058724   | 0.003672367 | 0           | 0.04057608  | 0.06027391  | 0.004593772 | 2.4022260     |
| 0.06943357  | 0.059074356 | 0.07792625  | 0.047655324 | 0.7557235   | 0.4800327   |               |
| 0.002168027 | 0.0194398   | 0.01116107  | 0.002631115 | 0.2993984   | 0.1691982   |               |
| 0.02021047  | 1.065225233 | 0.07204061  | 0.02252421  | 0.02599779  | 0.005099655 |               |
| 0.07617359  | 0.002684679 | 0.2870881   | 0.003279098 | 0.4429047   | 0.007199369 |               |
| 0.01372339  | 0.1319109   | 0.07958347  | 0.0275329   | 0.010326535 | 0.01656241  |               |
| 0.1458863   | 0.03010867  | 0.08182791  | 0.07596472  | 0.006785999 | 0.03325704  |               |
| 0.004643456 | 0.07194306  | 0.01727328  | 0.039164761 | 0.007497369 | 0.08982661  |               |
| 0.03315024  | 2.3161910   | 0.4423535   | 0.01365652  | 0.4310756   | 0.03990642  |               |
| 0.0155028   | 0.2116424   | 0.09205471  | 0.1474102   | 0           | 0.04851418  | 0.9256368     |
| 0.06010236  | 0.0366099   | 0.05500531  | 0.04550132  | 0.105692822 | 0.04129425  |               |
| 0.003135034 | 0.6247890   | 0.003482395 | 0           | 0.03705753  | 0.3417405   | 0.310459      |
| 0.007933958 | 0.01518512  | 0.01490923  | 0.00691221  | 2.48732     | 0.04960538  |               |
| 0.06642037  | 0.1424358   | 0.04005228  | 0.101987306 | 0.1170488   | 0.04623352  |               |
| 0.01896591  | 0.007672416 | 0.1067235   | 0.004469908 | 0.022492809 | 0.09805167  |               |
| 0.1647845   | 0.01133224  | 0.1731204   | 0.043952337 | 0.00466262  | 0.004482243 |               |
| 0.1317115   | 0.007857428 | 0.043448929 | 0.07511163  | 0.004113931 | 0.0935355   |               |
| 0.05526213  | 0.01335555  | 0.0571801   | 0.01345796  | 0.01973792  | 0.1044745   |               |
| 0.07510423  | 0.00788281  | 0.005365797 | 0.058872293 | 0           | 2.6729990   | 0.05971871    |
| 0.2338026   | 0.08351952  | 0.2394944   | 0.02393797  | 0.0140501   | 0.01392415  |               |
| 0.007731884 | 0.01564167  | 0.03333932  | 0.008543219 | 0.08574155  | 0.01535365  |               |
| 0.00183055  | 0.1133396   | 0           | 0.01275529  | 0.008674296 | 0.06363825  | 0.02343718    |
| 0.01126544  | 0.006274308 | 0.01016943  | 0.0154741   | 0.08971275  | 0.0183662   |               |
| 0.02076848  | 0.03858779  | 0.01861886  | 0.01497999  | 0.1057059   | 0.005325297 |               |
| 0.01596375  | 3.9877410   | 0.02928214  | 0.003082197 | 0.005259693 | 0.004044163 |               |

|             |             |             |             |             |             |
|-------------|-------------|-------------|-------------|-------------|-------------|
| 0.002961144 | 0.05376534  | 0.1160342   | 0.04517149  | 0.02147074  | 0.02173587  |
| 0.04454439  | 0.050086786 | 0.09408741  | 0.008857896 | 0.01241349  | 0.009133935 |
| 0.5671765   | 0.031894041 | 0.252537203 | 0.06814921  | 0.104077475 | 0.007829433 |
| 0.2647511   | 0.01484894  | 0.02933191  | 0.07806938  | 0.0551497   | 0.161758    |
| 0.005782887 | 0.09400591  | 0.008279804 | 0.012677232 | 0.07486244  | 0.01313732  |
| 0.01389229  | 0.1535127   | 0.1536674   | 0.02390368  | 0.008754268 | 0.01569925  |
| 0.5561438   | 0.08271488  |             |             |             |             |
| AL513327.1  | 0.1032582   | 0.09855046  | 0.1109231   | 0.110351243 | 0.202509811 |
| 0.3376347   | 0.1808832   | 0.1504360   | 0.1107991   | 0.5510798   | 0.1892645   |
| 0.23247539  | 0.4157748   | 0.45465933  | 0.318131835 | 1.1546080   | 0.3825387   |
| 0.2126286   | 0.04914054  | 0.6218454   | 0.234863427 | 0.3964248   | 0.6151499   |
| 0.2930496   | 0.3755554   | 0.3197567   | 0.3711280   | 0.7091928   | 0.2353044   |
| 0.266042327 | 0.5632796   | 0.41967993  | 0.1557834   | 0.8302323   | 0.3544238   |
| 0.37329075  | 0.6224210   | 0.2364228   | 0.9133779   | 0.6996513   | 0.1832132   |
| 0.2857238   | 0.7920843   | 0.9924739   | 0.2081666   | 0.7852253   | 1.087939    |
| 0.2341698   | 0.2716619   | 0.4153333   | 0.21157     | 0.2781698   | 0.1316334   |
| 0.406183965 | 0.2152787   | 0.3860304   | 0.5070077   | 0.2890442   | 0.609831    |
| 0.2212864   | 4.1687470   | 0.1777440   | 0.1082377   | 0.4083481   | 0.1288572   |
| 0.04325421  | 1.1255760   | 0.6437401   | 0.365843504 | 0.3458521   | 0.2606511   |
| 0.6118737   | 0.359177635 | 0.8552525   | 0.1333324   | 0.7301954   | 0.4921134   |
| 0.7160620   | 0.3161244   | 0.5012506   | 0.28302     | 0.2637462   | 0.09082345  |
| 0.02148723  |             |             |             |             |             |
| 0.2134668   | 0.5659647   | 0.8337895   | 0.08540906  | 0.1582074   | 0.3027628   |
| 0.272704651 | 0.4480001   | 0.3448325   | 0.5820625   | 0.396449659 | 0.5347428   |
| 0.07417856  | 0.1692519   | 0.6063124   | 0.3677807   | 0.7075310   | 0.3698760   |
| 0.3810978   |             |             |             |             |             |
| 0.4825915   | 0.2846789   | 0.483265318 | 7.7695130   | 0.227767716 | 0.2026171   |
| 1.0129140   | 0.1966290   | 0.2953134   | 0.1402939   | 0.3072622   | 0.2088152   |
| 0.04209517  |             |             |             |             |             |
| 0.9470792   | 0.3625961   | 0.1638530   | 0.4943196   | 0.5660466   | 0.4221099   |
| 0.3682621   | 0.8351114   | 0.2379251   | 0.04659414  | 0.1445863   | 0.583097542 |
| 0.2389780   | 0.4553073   | 0.3101884   | 0.1880832   | 0.161488315 | 0.6373233   |
| 0.7841160   | 0.3861274   | 0.4603557   | 0.09431098  | 0.3268914   | 0.4131557   |
| 0.3553693   | 0.3145114   | 0.1493048   | 0.1113633   | 0.08179963  | 7.698682    |
| 0.2907124   | 0.3952992   | 0.5667545   | 0.1779028   | 0.09467594  | 0.2037613   |
| 0.829632155 | 0.1924767   | 0.6269808   | 0.53827496  | 1.4140290   | 0.3402583   |
| 0.1910595   | 0.4664069   | 0.2957253   | 0.3712734   | 0.438959702 | 0.3623388   |
| 0.2121424   | 0.5169461   | 0.4796132   | 0.3055608   | 0.2707639   | 0.5535781   |
| 0.06732467  | 0.4774404   | 0.428114713 | 0.8485273   | 0.08272045  | 0.9007099   |
| 0.1700055   | 0.4952888   | 0.3117686   | 0.7618401   | 0.4965065   | 0.3987038   |
| 0.3322212   | 0.2669190   | 0.4683179   | 0.06460557  | 0.4067662   | 0.3846705   |
| 0.2418578   | 0.1966255   | 0.8071653   | 0.163965577 | 0.4295701   | 0.5651284   |
| 0.1195984   | 0.8461609   | 0.2737391   | 0.3442780   | 0.102262106 | 0.5682867   |
| 0.2645022   | 0.2139660   | 0.1264428   | 0.333206718 | 0.6318762   | 0.4091026   |
| 0.3883523   | 0.5593949   | 0.6635671   | 0.6844397   | 0.1161373   | 0.2763247   |
| 1.0473680   | 0.3319724   | 0.5192392   | 0.1749759   | 0.6797866   | 1.164375949 |
| 0.359464002 | 1.8800970   | 0.317551062 | 0.236514972 | 0.3145254   | 0.291394677 |

|             |              |             |             |              |             |             |
|-------------|--------------|-------------|-------------|--------------|-------------|-------------|
| 0.3158238   | 0.4365761    | 0.3331430   | 0.303547739 | 1.1351280    | 0.2252886   | 0.4343087   |
| 0.188535035 | 0.1669449    | 0.47353     | 0.1947761   | 0.6896243    | 0.3072699   |             |
| 0.4105604   | 0.2086393    | 0.6201558   | 0.3499446   | 0.2790103    | 0.2986113   |             |
| 0.322874249 | 0.4225977    | 0.195889791 | 0.3831816   | 0.5410811    | 0.1313317   |             |
| 0.1076660   | 0.1931712    | 0.8014737   | 0.3903224   | 0.1882551    | 0.2973255   |             |
| 0.279627975 | 0.7258447    | 0.3638507   | 0.1679848   | 0.2074175    | 0.188968    |             |
| 0.1440426   | 0.3591907    | 0.2894419   | 0.3940270   | 0.7227019    | 0.2968987   |             |
| 0.3750742   | 0.0642786    | 0.05824236  | 0.808741981 | 0.2830724    | 0.3366588   |             |
| 0.3174026   | 0.1761670    | 0.5259067   | 0.2583885   | 0.1465162    | 0.1647525   |             |
| 0.5632874   | 0.4305008    | 0.656991028 | 0.194642165 | 0.2159282    | 0.2677505   |             |
| 0.5503370   | 0.3721703    | 0.2718158   | 0.1065840   | 0.4558516    | 0.2200193   | 0.737913    |
| 0.4142439   | 0.3663429    | 0.2753550   | 0.3320489   | 0.9037233    | 0.7534621   |             |
| 0.3801777   | 0.4482379    | 0.2313335   | 0.288835062 | 0.9444306    | 0.3798194   |             |
| 0.2415037   | 0.02410875   | 0.05850828  | 0.2351715   | 0.7337231    | 0.05613894  |             |
| 0.5538482   | 1.1366870    | 0.6930298   | 0.223316333 | 0.2419777    | 0.4378604   |             |
| 0.4779820   | 0.2607446    | 0.3039454   | 0.324788546 | 0.3420669    | 0.1714695   |             |
| 0.5334134   | 0.2987799    | 0.2462836   | 0.2630354   | 0.520684017  | 0.5962569   |             |
| 1.2505020   | 0.4363979    | 0.2375114   | 0.588548785 | 0.5810310    | 0.3103074   | 0.1542088   |
| 0.734363235 | 0.241713168  | 0.2383337   | 0.3880523   | 0.2428312    | 0.5007321   |             |
| 0.3582862   | 0.0593791    | 1.10057     | 0.1561673   | 0.5062966    | 0.6870761   | 0.2080596   |
| 0.9008298   | 0.27024005   | 0.1580535   | 8.0162930   | 0.8527096    | 0.2160785   |             |
| 0.1644905   | 0.4786571    | 0.7820076   | 0.2472264   | 0.4337884    | 0.5754274   |             |
| 0.4376635   | 0.2019583    | 0.7799751   | 0.2869028   | 0.5646864    | 0.2978147   |             |
| 0.2545953   | 0.1388083    | 1.1810840   | 0.5224566   | 0.44057      | 0.4507124   | 0.5134414   |
| 0.1683194   | 0.3344159    | 0.4820752   | 0.4050553   | 0.1652949    | 0.4942472   |             |
| 1.1938030   | 0.8562583    | 1.1213320   | 0.4374928   | 0.07373447   | 0.1263059   | 0.6397544   |
| 1.6652120   | 0.8855341    | 0.1228941   | 0.04899631  | 0.8456297    | 0.3134480   | 0.293208    |
| 0.4299955   | 0.5016693    | 1.1608330   | 0.3469303   | 0.299468289  | 0.4089161   |             |
| 0.2555148   | 0.4189529    | 0.04742594  | 0.2933206   | 0.322005359  | 0.48564578  |             |
| 0.2415165   | 0.115799846  | 0.1897121   | 0.4446157   | 1.2830171    | 1.4391970   | 0.2357015   |
| 0.3080721   | 0.7136090    | 0.1651071   | 0.4704130   | 0.4474295    | 0.6114283   | 0.162365187 |
| 0.02727766  | 1.1766680    | 0.3546522   | 0.0724619   | 1.0521120    | 0.4633611   | 0.2878792   |
| 0.7825429   | 0.1554431    | 0.6503535   |             |              |             |             |
| AF001548.1  | 0.5384177    | 21.471870   | 0.2180066   | 16.456523195 | 0.369580405 |             |
| 0.29242610  | 0.563586     | 0.75804920  | 0.3159918   | 0.898191     | 1.4839742   | 1.09871242  |
| 2.242187    |              |             |             |              |             |             |
| 1.234981622 | 24.409511134 | 0.2606795   | 0.5500443   | 0.3104377    | 0.2391506   |             |
| 0.07826675  | 0.114300201  | 0.1400275   | 0.31067     | 0            | 0.03655406  | 0.9754964   |
| 0.2281461   | 0.5037186    | 0.09040644  | 0.186741249 | 0.6796597    | 0.056734509 |             |
| 0.03158941  | 0.53164      | 0.3177379   | 0.087903951 | 0.4763528    | 0.05393395  |             |
| 0.1389096   | 0.9286281    | 0.04458189  | 0           | 0            | 0.3099491   | 0.05240057  |
| 0           |              |             |             |              |             |             |
| 0.03379556  | 0.2991519    | 0.0550870   | 0.1977348   | 0            | 0           | 0.04804619  |
| 0.071449228 |              |             |             |              |             |             |
| 0.2973173   | 0.07134233   | 0           | 0.08329038  | 0.08672272   | 0.8731843   | 0.2596575   |
| 0.5111486   | 0            | 0.3726177   | 0.08551434  | 0.098336426  | 0.2255398   | 0.2434579   |
| 0.3159195   | 0.404645088  | 0.04138886  | 0           | 0            | 0.226034201 | 0.02497337  |



|             |             |             |             |             |             |             |             |
|-------------|-------------|-------------|-------------|-------------|-------------|-------------|-------------|
| 0.04634889  | 0.1640131   | 0.04605676  | 0.5303010   | 0.5344795   | 0.06664664  |             |             |
| 0.2139274   | 0.04572491  | 0           | 0.1532762   | 0.07894667  | 0           | 0.08313149  |             |
| 0.02566476  | 0.0334874   | 0.204929525 | 0.09169347  | 0.02420459  | 0           | 0           |             |
| 0.1069486   | 0.1353759   | 0.7300909   | 0           | 0.05535668  | 0           | 0.2945558   |             |
| 0.03918329  | 0           | 0.03522299  | 0.148228438 | 1.7779760   | 0.325311716 | 0           | 0           |
| 2.2009340   | 0.3773168   | 0.1043262   | 0.04234308  | 0           | 0           | 0.03393527  |             |
| 0.04600487  | 0.1266152   | 0.08182456  | 0.04164057  | 0.1024119   | 0           | 1.1579020   |             |
| 3.3863320   | 0.280040267 | 0.07929723  | 0.2194925   | 0           | 0.5195163   | 0           | 0.03551496  |
| 0.04691842  | 0.1374990   | 0.04049824  | 0           | 0.02818726  | 0.04894709  | 0.025797    |             |
| 0.03892588  | 0.08129519  | 0.0271426   | 0.8002245   | 0           | 0.04007895  | 0.2267018   |             |
| 0.08289512  | 0           | 0.04374875  | 0           | 0           | 0.5509304   | 0           | 0.4657286   |
| 0.08204321  | 0.5803586   | 0.09186361  | 0           | 0.220993505 | 0           | 0.04554823  | 0           |
| 0.08270495  | 0.1991601   | 1.2079080   | 0.1347040   | 0.1512216   | 2.29297     | 0           | 0.05386304  |
| 0           | 0.6575182   | 0.7300237   | 0.05356457  | 0.2069010   | 0.07130042  | 0.09795938  |             |
| 0.6505909   | 0           | 0.6611011   | 4.4773090   | 0           | 2.2271090   | 0           | 0.04676434  |
| 0.074809295 | 0.3048755   | 0.3437864   | 0           | 0.03412693  | 0.2497870   | 0.2199076   | 0           |
| 0.03877096  | 0.1679014   | 0           | 0.1730686   | 1.647760964 | 0.09318578  | 0.1518533   |             |
| 0.3808171   | 0.3379517   | 0           | 0.02700762  | 0           | 0           | 0.04633811  | 0.7500995   |
| 0.3158705   | 0.1451505   | 0           | 0.063432421 | 0.055831643 | 0.05915823  | 0.149556307 |             |
| 0.080305084 | 0.8036124   | 0           | 0.03779531  | 2.0184370   | 0.1737103   | 0.612908094 |             |
| 0.1090320   | 0           | 0.050974287 | 0           | 0           | 0.1458324   | 0.1391961   | 0.1094181   |
| 0           | 0.02902011  | 0           | 0.02951848  | 0.1329184   | 0.196415168 | 0           | 0           |
| 0.5861130   | 0           | 0           | 0.09972883  | 0.3930143   | 0.2290438   | 0           | 1.107137204 |
| 0.4225930   | 0.09486107  | 0.06569404  | 0.1288636   | 0.06416124  | 0.0678394   | 0           |             |
| 0.2900094   | 0.1307453   | 0.2274019   | 0           | 0.1587270   | 0.06703339  | 0.07730349  | 0           |
| 0.02615732  | 0           | 0.06916533  | 0.02521606  | 0.0457038   | 0.08573802  | 0.1527955   |             |
| 0.02933398  | 0.3029893   | 0.2618880   | 0.038063766 | 0.047362927 | 0.4413572   |             |             |
| 0.06980637  | 3.9751710   | 0.1164361   | 0.04313599  | 0.6298608   | 0.2016798   |             |             |
| 0.1566967   | 0.4262908   | 0           | 0.2865325   | 0.02716339  | 0.02786157  | 0.8246475   |             |
| 0.02052341  | 0           | 0.02895696  | 0.07186106  | 0.070283198 | 0.1118002   | 0.03960974  |             |
| 1.36828     | 0.08799694  | 0           | 0.07803417  | 0           | 0           | 0.03341398  | 0           |
| 0.116443517 | 1.7253570   | 0.06267414  | 0.1766718   | 0.4152950   | 0.03892634  | 0.25771265  |             |
| 0.6788202   | 0.2503455   | 0           | 0           | 0           | 0.106569906 | 0.1339285   | 0           |
| 0.03579444  | 0.1066974   | 0           | 0           | 0.1132622   | 0.1957782   | 0           | 0.039211247 |
| 0.01977086  | 0.07796648  | 0           | 0.08214257  | 0           | 0.07224445  | 0.08501757  | 0           |
| 0.2309978   | 0.09037217  | 0.04979786  | 0           | 0.161701014 | 0.04120681  | 0.8006322   |             |
| 0.04715742  | 0.3728336   | 0.1455491   | 0.4682944   | 0           | 0           | 0.1172835   |             |
| 0.2442221   | 0           | 0.03510227  | 0.1619095   | 0.1444407   | 0           | 0.02312816  |             |
| 0.1828078   | 0           | 0           | 0.06575747  | 0.5675579   | 0.1316080   | 0           | 0.08565741  |
| 0.03258471  | 0.04928173  | 0           | 0           | 0.06094239  | 0.03360584  | 0           | 0.02903361  |
| 0.02881353  | 3.7911090   | 0.05285237  | 0.1557686   | 0.03322692  | 0           | 0.03741271  |             |
| 0.07150533  | 0.8796239   | 0.2445948   | 0.04521217  | 0           | 0.2462242   | 0.230117738 |             |
| 0.07925011  | 0.07461033  | 0.03920969  | 0.05770156  | 1.1419950   | 0.067161118 |             |             |
| 0.070904284 | 0           | 0.093926542 | 0.04946066  | 0.3894833   | 0           | 0.07035359  |             |

|             |             |             |             |             |             |             |
|-------------|-------------|-------------|-------------|-------------|-------------|-------------|
| 0.1852977   | 0.07890969  | 0.09954164  | 0.4192284   | 0.01826604  | 0.2309459   | 0           |
| 0           | 0.09956346  | 0.2074801   | 0.08776138  | 0           | 0.4853793   | 0.06040242  |
| 0.6110108   | 0           |             |             |             |             |             |
| LINC02489   | 0.3346099   | 3.2672410   | 0.3387108   | 3.93354531  | 0.353358058 | 0.2596195   |
| 0.6838474   | 1.2468514   | 7.309642    | 8.344110    | 0.3975188   | 1.068928872 | 1.147047    |
| 0.719533784 | 3.608190162 | 0.1350035   | 0.7231134   | 0.3215456   | 0.3715617   |             |
| 0.04053363  | 0           | 0           | 0           | 0           | 0.04430803  | 0.7826136   |
| 1.5839530   | 3.08513926  | 0           | 0           | 0.4936605   | 0           | 0.3985133   |
| 0.5771135   | 0.1385313   | 0           | 0.09981853  | 0.7825339   | 0           | 0           |
| 0.5975794   | 0.04279357  | 0.1024050   | 0.05852651  | 0.2835909   | 0.1492961   |             |
| 0.055504343 | 0.1979716   | 0           | 0           | 0           | 0.0449129   | 0.4069927   |
| 0           | 0.07236572  | 0           | 0.152782583 | 0.3504150   | 0.06135442  | 0.565817284 |
| 0.1929142   | 0           | 0           | 0           | 0.1940022   | 0.07201098  | 0           |
| 0.5110191   | 0           | 0           | 0.3196869   | 0           | 0.07938032  | 0.2044288   |
| 0.1196239   | 0           | 0.045484761 | 0.3324104   | 0.0376060   | 0.2973712   | 0           |
| 0.2103298   | 0.08725555  | 0           | 0.04300307  | 0.05210832  | 0           | 0.0608780   |
| 0.10945     | 0           | 0           | 0.336951871 | 0           | 0           | 1.5858690   |
| 0.05272429  | 0           | 0.09835927  | 0           | 0           | 0           | 0.6425001   |
| 0.0410673   | 0.2435853   | 0           | 0.7495040   | 0.538696896 | 0           | 0.07289584  |
| 0.05274006  | 0           | 0.09506512  | 0           | 0           | 0.08016017  | 0           |
| 0.1245391   | 0           | 0           | 0.06316449  | 0.2039137   | 0           | 0.1898290   |
| 0.2411965   | 0.06373413  | 0.5410123   | 0.1427259   | 0           | 0           | 0.07209785  |
| 0           | 0           | 0.3412169   | 0.09301594  | 0.05873719  | 1.1400080   | 0.08368551  |
| 0           | 0           | 0.4821845   | 0.05538874  | 0.07609839  | 0.2128011   | 0.06279982  |
| 0.9190152   | 7.771160    | 1.221240    | 0.1337236   | 0.7522170   | 0           | 0           |
| 0.2706723   | 0.05341314  | 0.1427854   | 0.05302207  | 0.06468118  | 0.04880919  | 0           |
| 0.5421363   | 0           | 0           | 0.08963065  | 2.681989193 | 0.1447802   | 0.2359303   |
| 0.1314811   | 0           | 0           | 0           | 0.05987304  | 0           | 0           |
| 0.06371909  | 0.098553197 | 0           | 0           | 0           | 0.062383893 | 0.7134574   |
| 1.6505210   | 0.08996294  | 0           | 0           | 0           | 0.09658521  | 0.079197339 |
| 0           | 0           | 0.0612697   | 0.1183173   | 0           | 0.6615007   | 0.04586205  |
| 0.183098885 | 0.1019792   | 0.116933915 | 0.6268229   | 0.47511     | 0           | 0.07632043  |
| 0.07303036  | 0           | 0.4579616   | 2.6096320   | 0.591294146 | 0.2020219   | 0           |
| 0.06804468  | 0.05005297  | 0.2990566   | 0.0527001   | 0.06789786  | 0           | 0.2031354   |
| 0           | 0.3367368   | 0.3082623   | 0.4165917   | 0.1801564   | 0           | 0.0812798   |
| 0.03917749  | 0           | 0           | 0           | 0.09115078  | 0           | 0           |
| 2.4967270   | 0.2412048   | 0           | 1.0937260   | 0.03133443  | 0           | 0.06021056  |
| 0.1731510   | 0.3494269   | 0           | 0           | 0.04498963  | 0           | 0.818977947 |
| 0.6541106   | 0           | 0           | 0.1212395   | 0           | 0           | 0.05191438  |
| 0.7658971   | 0           | 0           | 0           | 0.06047877  | 0.160160404 | 0.3389992   |
| 0.07530455  | 0.1745813   | 0           | 0.110383142 | 0.05202024  | 0.4354417   | 0           |
| 0.04144322  | 0.13622872  | 0           | 0           | 0.3041751   | 0           | 0.060921429 |
| 0.4284225   | 0.1914340   | 0.1310843   | 0.1122442   | 0.1981342   | 0.0553506   |             |
| 0.0512707   | 0.1404087   | 0           | 0.05266515  | 0.050246078 | 0.06402188  | 0.2261673   |

0 0.08911712 0.5653391 0.3917717 0 1.8386850.0911101 0  
0.05117418 0 0 0.1122068 0.07534783 0.03593359 0 0 0.06259639  
0 0.07348325 0 0.3685667 0 0 0 0 0 0.04734226 0 0  
0 0 0 2.3048380 0.06050336 0.1032475 0.07938668 0 0  
0.4555491 0 0 0 0.05465024 0 0.0820858 0 0 0.3585973  
0.2217857 0.052173185 0.716053149 0.1274062 1.386345149 0 0.06723661  
0 0 0 0.1225998 0.1546551 0.5699256 0 0.05125919 0 0  
0.3093780.06447122 0.2727049 0 0.3105202 0 0.1718458 0  
1.0849260.0463911  
MBNL1-AS1 1.62792737.069730.6893255 27.797596565 0.774087572 1.015355  
8.13189613.5398316.3287612.475121.5129983.401872222 5.48349 2.478813009  
18.216769858 0.7039863 0.7774705 0.3586809 0.4569193 0.2462303  
0.281628059 0.3703586 0.3656329 0.1346204 0.2320364 0.9835383  
0.4025470.4324084 0.2038779 0.171569409 2.4182880.220347011 0.1108148  
0.6867857 0.6937914 0.205576438 0.9365128 0.2837982 0.3828714  
2.9473540.3388494 0.0797238 0.7405216 2.3558010.1838198 0.1151465  
0.1100858 0.3533750.1633369 0.7817305 0.3901412 0.2591724  
0.4334007 0.465477883 0.7840095 0.4588227 0.4804991 0.2040625  
0.06277575 1.3091130.3296486 0.7192085 0.1393219 0.4162595  
0.2892683 0.525655613 0.1469348 0.2770558 0.2935509 1.706760412  
0.2696404 0.1589239 0.1105396 0.275634721 0.5944687 0.394863  
0.5239827 0.7424336 0.8953396 0.1970303 1.0164510.3228592  
2.6694640.8134659 0.209618777 0.3456570.1802326 0.2146482 0.361057  
0.2700938 0.08670618 0.63086017 0.1455120.2931384 0.4667983  
0.093392944 0.3037112 0.6784212 0.5581970.2364621 0.1225245  
0.1540697 0.2788253 0.2749078 0.2686587 0.3853935 0.344178104  
2.01963 0.492098124 0.2322543 0.1453161.7210650.3231814 0.4434567  
0.6055991 0.6118367 0.08066529 0.5399959 0.5101886 0.2343908  
0.5076145 0.2289472 0.2260669 0.2010136 0.08961627 1.360871  
0.2114917 3.88993 0.682983551 0.1435017 0.4426039 0.3454734  
1.8472440.306971334 0.1750130.7484859 0.5225381 0.0878921 0.2672208  
0.8074689 0.4779206 0.2371165 0.2994959 0.2796043 0.217281  
0.2561751 2.0154010.07877907 0.1472909 0.5822467 0.4638854  
0.2988155 0.2777066 0.658398222 0.2245085 0.5061699 0.05422377  
0.5640903 0.09724781 0.2912316 3.2638750.2723822 0.1989334  
0.809078981 0.2984424 0.1902166 0.5594656 0.4213745 0.3393435  
1.6600710.6850550.06946777 7.8393940.140873171 0.2069453 0.04267681  
0.3444856 0.06402258 0.5569983 0.7459643 0.2828737 0.2945476  
1.3499050.2430739 2.0314144.9571310.2593257 0.3378729 2.356193  
0.1561397 0.1743801 0.3827787 0.428009139 1.2659330.2813984  
0.8405151 0.1909761 1.4917040.1889216 0.113365737 0.1101013  
0.3996742 0.1462042 0.1108235 11.147722236 0.8794983 1.07385  
0.7209598 0.1905309 0.4164892 0.3000163 0.7338607 0.3077347  
0.2167371 0.7518082 0.4296579 0.5964725 0.2021013 0.121855752

0.165544848 0.3952866 0.218599765 0.482928066 1.4127210.065660241  
0.4640472 4.58732 0.3651389 0.181140994 0.3779280.3459507 0.1817298  
0.676947824 1.2750470.3331388 0.9378894 0.1143233 0.6488649  
0.3524333 0.9477246 0.06786783 0.4826178 0.4142001 0.4684946  
0.446221854 0.4111689 0.691481646 2.7204783.0245060.3271653 0.1764236  
0.3611925 0.1416043 1.1776251.04261 0.2559318 1.340838147 0.3991197  
0.2773084 3.6726150.3363468 0.8038425 0.1728179 0.7336681  
0.1522557 0.8932774 0.2507119 0.2570552 1.2461940.5542852  
0.2840918 0.242466191 0.1310845 0.4297784 0.3841643 0.1642777  
0.7978210.2040916 0.3350015 0.2009054 0.3940603 0.3171688  
0.384683921 1.182814475 1.0295460.1515917 9.5896941.0535540.5043996  
4.3881230.6771663 0.1766853 0.7638924 1.2563860.8376234 0.1361263  
0.3979318 1.1082960.7970936 0.2212651 0.4788782 1.2064150.21132989  
0.3268266 0.2315831 2.9647670.09187228 0.1308033 0.3421772  
0.6756124 0.1760348 0.1367512 0.1922941 0.5484205 0.240711825  
3.0605640.03140845 0.3393923 0.7024067 0.09753752 1.373293378  
0.6722669 0.19748 0.1476054 0.2671853 0.6123868 0.1509437  
0.513294183 0.8389596 0.3778835 0.1195866 0.3230494 0.156233757  
0.3493453 0.1513603 0.8707446 0.505797609 0.645184305 0.2658633  
0.1736535 0.2467647 0.4836869 0.2008367 1.1766470.1384683  
0.1458028 0.5264415 0.3170231 0.3015474 0.1868593 0.856266416  
0.2374789 1.0821 0.3544863 0.7258072 0.7233251.2877340.1641977  
0.1878055 0.2840809 0.1591060.1595609 0.2697304 0.2411636  
0.3558923 0.2794907 0.2066959 0.4606052 0.2539022 0.3466043  
0.1025224 0.6123046 0.1346559 0.1030308 0.1820812 0.3469873  
0.4027935 1.39538 0.3837523 0.8657019 0.2774105 0.2049012  
0.1146083 0.09942414 0.1657801 0.2623191 10.619090.3399085  
0.4195818 0.2580952 1.0157160.3468559 0.2090323 0.4065283  
0.6877875 0.06797273 0.3047394 0.3907430.999448336 0.5361568  
0.3552063 0.3438663 0.0578331.5380510.260842154 1.305834021 0.2225981  
0.294189056 0.1693755 0.8168865 0.6146486 0.2683444 0.6212768  
0.4349919 0.6845221.0285740.1647688 0.5318345 0.1893122 0.139131128  
0.3035287 0.3535197 0.2162382 0.1178171 0.5580269 0.2774751  
0.4526708 0.6129812 1.7387860.4314478  
AC004918.5 0.8003507 0.5264766 1.3518090.307918313 0.963521471 1.639392  
0.4972495 0.4269443 0.7072471 0.3754859 2.5253830.436354099  
2.3249570.43599858 0.734502195 0.8524923 0.9056862 0.5845178  
0.8176365 1.59777 1.223321074 1.6096851.4945751.1325971.4345 1.222195  
2.1365572.4959030.4569191 0.421934281 0.7072135 2.108377026 0.3193092  
1.7069950.9716154 0.452982521 1.2854590.4168949 3.3037951.435609  
1.5904890.5255067 1.37523 1.0827281.2151272.6101560.4621771 2.18531  
1.7196080.7446229 0.8287353 2.61831 0.8856082 1.741816304 0.3788213  
3.1178531.4113110.6438121 1.6672640.9605027 1.8835690.9117785  
0.8352180.7754476 2.2118170.935524922 0.4291352 4.2703832.254128

1.178938931 2.0425960.2262733 2.5968431.102069456 2.4797882.011792  
0.4388459 2.9028211.5990930.8842748 0.2933526 1.1095762.060642  
2.7459660.466330963 0.7594766 0.3129418 2.5534741.3593120.8240468  
1.9712311.253314159 0.4725105 0.7627717 3.0727291.212385918 0.9538655  
0.2414813 2.0369691.0432060.5430939 1.1765781.0800381.6308721.402544  
0.6492454 0.987121273 15.487611.439968375 1.5478632.0689860.7586455  
1.4132881.8108291.9229860.6797782 0.9396812 1.2665820.7667537  
0.6017934 0.6022777 2.2136861.7826671.0656381.5079310.9343689  
0.5393166 1.0459711.065666744 0.7072456 2.2559421.0232530.6839964  
1.566821762 0.8657972 1.5622560.6131713 1.3724960.9150414 2.328427  
1.2737591.3969761.0890521.5507230.7975717 1.17813611.785430.2804109  
0.8817369 0.8761719 0.6407569 1.6921251.8729191.114611334 2.252091  
0.9323437 0.731396124 1.4146261.5230581.0244310.7361666 0.5462161  
4.1997371.927222641 1.1864580.6499856 1.9633470.8359906 0.4026264  
1.5670162.7321040.5170143 1.2724950.973368665 0.8326935 0.1104774  
2.2213451.6928661.2898931.6197932.79806 2.5337060.9772745 1.586222  
1.2413281.0524913.15476 1.2026450.6717095 1.2350510.6982862 2.864  
1.668045084 1.6055991.0220680.7923435 0.5478756 1.5594813.455691  
0.766689414 0.5071661 0.4492497 1.3770791.8523020.606511757 0.4155582  
0.6922324 1.9624092.12666 0.9530205 2.0554991.7414321.28507 2.011324  
1.0978592.1732870.8975791.8532950.867481218 1.112105966 0.3869268  
1.511731316 0.811732467 1.0239081.209818654 1.4382653.44254 1.532093  
2.971521154 1.4262570.9416569 1.5894271.272979497 1.2204311.106741  
1.4090560.6759161.07348 1.5241251.4036913.0714260.2169927 1.5445351.40678  
2.452535339 1.1708310.60413749 0.9115699 1.0151951.1075270.8762411  
1.7887311.3045610.8178946 0.6809409 3.3655610.740585021 1.700915  
3.3842331.6405761.6473651.3352480.6655595 1.3771890.9114581 0.839597  
2.7312810.8247685 1.4156740.8370116 1.3789271.454576252 1.586406  
1.1416260.2467520.5247666 1.8750911.8097671.0447911.2034861.981714  
1.3755021.516378133 0.647720027 0.7872858 0.3735584 0.6537659  
1.2692590.8720466 0.7710538 0.6475556 0.9084173 4.70072 0.9220731  
3.4642040.8560140.8448833 3.0757122.1965590.9000963 1.1363651.516851  
2.173080513 1.1522470.4474831.0482560.7586764 1.01583 1.06717 4.842128  
1.1487463.83448 1.6541191.5680651.003931941 0.7816291 1.7142220.7878608  
0.8642626 0.7869433 0.245175278 1.0955480.3142475 2.9030330.5187466  
0.9687849 0.8394970.697024793 1.5528462.1425750.8513271 1.728787  
1.320755847 1.0158010.5050882 0.9021671.298624716 1.328943355 1.398922  
0.2472450.4216075 0.7814645 0.95316 0.8161670.8088158 5.274523  
0.6867503 2.2837292.23552 1.2697710.557649982 0.5635309 23.67275  
1.9908081.5006361.6443121.8634421.88824 1.1610551.4644591.1326621.17507  
0.3130743 3.4176040.7300112 2.1626861.1826621.0507330.3615018  
2.5393152.7108671.4342340.4890839 1.8336691.2490860.9422315 0.6974889  
1.2893170.2483547 0.6630927 2.2647511.61853 0.5908148 1.0185311.08016  
0.65103 0.6207143 1.1627522.0607770.3161047 0.3038151.2012510.5739752

|           |             |             |             |             |             |             |             |            |
|-----------|-------------|-------------|-------------|-------------|-------------|-------------|-------------|------------|
|           | 7.2176711   | 1.6725      | 0.4570095   | 1.2829870   | 0.7320178   | 1.40247432  | 0.7853614   |            |
|           | 0.5767177   | 1.5853430   | 0.4803265   | 0.5262435   | 1.33777686  | 1.264779118 |             |            |
|           | 0.8776566   | 1.563749999 | 0.5587718   | 0.7204857   | 3.9778490   | 0.6135340   | 0.3620101   |            |
|           | 0.9383855   | 0.5524112   | 0.9970838   | 0.5647661   | 0.7650642   | 2.011181    |             |            |
|           | 0.47618424  | 0.1479997   | 1.8998451   | 0.6698380   | 0.6989418   | 1.8844140   | 0.6644267   |            |
|           | 1.6605882   | 2.26444     | 0.8304085   | 1.029732    |             |             |             |            |
| HMGA2-AS1 | 0.009816999 | 0           | 0.008517697 | 0.005245675 | 0.02591761  | 0.01142532  |             |            |
|           | 0.02006315  | 0.0192531   | 0.008675001 | 0.01066125  | 0.009330127 | 0.029270189 |             |            |
|           | 0.0024928   | 0.003518357 | 0.063065164 | 0.007921637 | 0           | 0           | 0.002725278 |            |
|           | 0.002378403 | 0.015630311 | 0.02127607  | 0.03089707  | 0.06144667  | 0.003332461 |             |            |
|           | 0.1524538   | 0.04419787  | 0.002551202 | 0.02884674  | 0.102145884 | 0.1022362   |             |            |
|           | 0.033619405 | 0.002879857 | 0.2229486   | 0.1613856   | 0.005342524 | 0.3908414   |             |            |
|           | 0.7768706   | 0.06331863  | 0.1523855   | 0.07722206  | 0.08057247  | 0.05857079  |             |            |
|           | 0.6287091   | 0.009554222 | 0.02315194  | 0.1294012   | 0           | 0.00251101  | 0           |            |
|           | 0.0137367   | 0.006240128 | 0           | 0.058623185 | 0.003872144 | 0.04227562  | 0.003667575 |            |
|           | 0.1670502   | 0.02108293  | 0.1552279   | 0.08995261  | 0.5018353   | 0.004001827 |             |            |
|           | 0.1401254   | 0.09744921  | 0.017929731 | 0.0205614   | 0.005548725 | 0.00360011  |             |            |
|           | 0.121735593 | 0           | 0           | 0.0150817   | 0.206064662 | 0.07968464  | 0.2239466   |            |
|           | 0.1420468   | 0.02099388  | 0.06215789  | 0           | 0.02248891  | 0.02430343  | 0.06630935  |            |
|           | 0           | 0.038133036 | 0.06753841  | 0.1295495   | 0.1202267   | 0           | 0.03041654  |            |
|           | 0.006105775 | 0.373649059 | 0.00278642  | 0.1522566   | 0           | 0           | 0.01462499  |            |
|           | 0.5389155   | 0.1638374   | 0           | 0.09588551  | 0.03669089  | 0.05370651  | 0.01071647  |            |
|           | 0.0223421   | 0.1027556   | 0.191888629 | 0.1620897   | 0.128514214 | 0.07011836  | 0           |            |
|           | 0.2064646   | 0.03023584  | 0.002457013 | 0.004755464 | 0.1428281   | 0.004002086 |             |            |
|           | 0.01362783  | 0.08353038  | 0.02935832  | 0.01731436  | 0           | 0.01898087  | 0.02100693  |            |
|           | 0.002223088 | 0.01131005  | 0.04823575  | 0.04811156  | 0.576976714 | 0.002409718 |             |            |
|           | 0.008575752 | 0.09358268  | 0.0879577   | 0.233908568 | 0.1197961   | 0.0821640   | 0.1065486   |            |
|           | 0.2413822   | 0.01476813  | 0.1617667   | 0           | 0           | 0.01175895  | 0.01064606  |            |
|           | 0.09634686  | 0.00989785  | 7.8901120   | 0.003582796 | 0           | 0.0155005   | 0.01259526  | 0          |
|           | 0           | 0.048201432 | 0.09467853  | 0.0231811   | 0.074760088 | 0.4897635   | 0.04245827  |            |
|           | 0.01869873  | 0.03527236  | 0.004187385 | 0.1572358   | 0.130955044 | 0.008461011 |             |            |
|           | 0.008304832 | 0.004300387 | 0.002513273 | 0.01089389  | 0.06673893  | 0.1091584   |             |            |
|           | 0.05169808  | 0.0836157   | 0.927098097 | 0           | 0.008469383 | 0.1008129   | 0.04658696  |            |
|           | 0           | 0.09745461  | 0.02275042  | 0.004465246 | 0.09052775  | 0.2468898   | 0.02854869  |            |
|           | 0.1044169   | 0.1289863   | 0.0117698   | 1.0534280   | 0.1387862   | 0.01278985  |             |            |
|           | 0.057970073 | 0.09926447  | 0.02820724  | 0.1089174   | 0.009333572 | 0.01518126  |             |            |
|           | 0.03723187  | 0.012373834 | 0.007069129 | 0.003826693 | 0.1153896   | 0.1577785   |             |            |
|           | 0.135912024 | 0.07433392  | 0.2953333   | 0.05400468  | 0.01026982  | 0           | 0           |            |
|           | 0.05621099  | 0.01125893  | 0.008448851 | 0.6838302   | 0.01645509  | 0.002646536 | 0           |            |
|           | 0.584066135 | 0.111977934 | 0.01078635  | 0.08521462  | 0.117136538 | 0.01744322  |             |            |
|           | 0.046373374 | 0.01378248  | 0.1888537   | 0.00263939  | 0.330957398 | 0.0298198   |             |            |
|           | 0.11106     | 0           | 0.413590479 | 0.1344930   | 0.01212066  | 0.01994227  | 0.3235910   | 0.06982588 |
|           | 0.06830764  | 0.06942539  | 0.005291251 | 0.08872014  | 0           | 0.0557407   | 0.150412411 |            |
|           | 0.01795158  | 0.205840904 | 0.007356052 | 0.06969541  | 0.1248601   | 0.0179131   | 0           |            |

|             |             |             |             |             |             |             |             |
|-------------|-------------|-------------|-------------|-------------|-------------|-------------|-------------|
| 0           | 0.004478656 | 0.04872195  | 0.01163953  | 0.1293197   | 0.05334342  | 0.06918427  |             |
| 0.09382789  | 0.002936972 | 0.3626551   | 0.003092298 | 0.003984062 | 0.0491006   |             |             |
| 0.1382654   | 0.008292461 | 0           | 0.1410863   | 0.3483337   | 0.1550426   | 0           |             |
| 0.03338494  | 0.1260273   | 0.006305475 | 0.0160918   | 0.1499975   | 0.003908164 |             |             |
| 0.1079547   | 0.005348479 | 0.1538945   | 0.007958362 | 0.069401861 | 0.030224974 |             |             |
| 0.01437016  | 0.01909175  | 0.03084234  | 0.03184479  | 0.05112255  | 0.40195     |             |             |
| 0.03125652  | 0.1678522   | 0.6041416   | 0.04948138  | 0.06965815  | 0.03466901  |             |             |
| 0.03048009  | 0.05467578  | 0.01309715  | 0.5865247   | 0.007919607 | 0.02292931  |             |             |
| 0.39085054  | 0.04416659  | 0.003611032 | 0.2278897   | 0.004011132 | 0.02163202  |             |             |
| 0.1671791   | 0.1345309   | 0           | 0.003046194 | 0.004372675 | 0.009813102 | 0.045116314 |             |
| 0.02247038  | 0.05142334  | 0.04831899  | 0.05679072  | 0.1490466   | 0.143316085 |             |             |
| 0.4486649   | 0.1622956   | 0.01365346  | 0.2430266   | 0.02817088  | 0.005148581 |             |             |
| 0.265556261 | 0.6898437   | 0.09490197  | 0.02610567  | 0.04620373  | 0.05062569  |             |             |
| 0.01074111  | 0.08776742  | 0.4149699   | 0.004525217 | 0.028597628 | 0.09372561  |             |             |
| 0.07107834  | 0.03232114  | 0.1123282   | 0           | 0.05927566  | 0           | 0.1883737   |             |
| 0.6979546   | 0.03707461  | 0.002269917 | 0           | 0.023586423 | 0.0638627   | 0.8692427   |             |
| 0.6921581   | 0.02353117  | 0.1492765   | 0.2692891   | 0           | 0.0107889   | 0.005346092 |             |
| 0.008905828 | 0.006005523 | 0           | 0.002460087 | 0.006583988 | 0.06631808  | 0.217174    |             |
| 0.04999715  | 0.01385667  | 0           | 0.04396184  | 0.3535673   | 0.03899376  | 0.06487947  |             |
| 0.003613473 | 0.2225559   | 0.3000299   | 0.004492782 | 0.02115477  | 0.09568717  |             |             |
| 0.01111166  | 0.00612737  | 0.004313606 | 0.00794057  | 0.03680307  | 0.1628612   |             |             |
| 0.03506264  | 0           | 0.04970241  | 0.02423312  | 0.2329097   | 0           | 0.03259401  |             |
| 0.1897857   | 0.003716425 | 0.03709601  | 0.01072974  | 0.2148507   | 0.047202171 |             |             |
| 0.03130771  | 0.09182524  | 0.04289474  | 0           | 0.02863032  | 0.293892509 | 0.084032095 |             |
| 0.2242755   | 0           | 0.01803638  | 0           | 1.0368250   | 0.01068967  | 0.2944158   | 0.1115042   |
| 0.5777584   | 0.03344168  | 0.006660912 | 0.2165580   | 0.131418326 | 0.04084528  |             |             |
| 0.003782996 | 0.03600355  | 0.09644771  | 0.007808776 | 0.02202641  | 0.007562582 |             |             |
| 0.02893263  | 0.3461541   | 0.1714925   |             |             |             |             |             |
| AL445649.1  | 0.06428287  | 0           | 0           | 0.045799074 | 0.135769268 | 0.6317659   | 0.2802686   |
| 0.06723819  | 0.03786996  | 0.05584892  | 0           | 0.036507556 | 0.3917556   | 0.030718157 |             |
| 0.196646753 | 0.5878806   | 0.4378066   | 1.1530970   | 0.2617332   | 0           | 0.045488503 |             |
| 0.2600607   | 0.2697569   | 0           | 0           | 0           | 0.06809715  | 0           | 0.029727261 |
| 0.08114606  | 0           | 0           | 0           | 0.2890317   | 0           | 0.2333243   | 0           |
| 0.03548486  | 0           | 0           | 0.4934066   | 0           | 0.02887651  | 0           | 0           |
| 0.02998319  | 0           | 0           | 0           | 0           | 0           | 0.02209827  | 0.02300892  |
| 0           | 0.1048177   | 0.1112191   | 0.03403248  | 0.039135336 | 0.2872287   | 0.02422247  |             |
| 0           | 0           | 0           | 0.07572462  | 0           | 0.03598229  | 0.03975501  | 2.9513040   |
| 0.03665878  | 0           | 0           | 0           | 0           | 0.1021651   | 0.03639465  | 0           |
| 0.7558289   | 0           | 0.652452901 | 0           | 0           | 0.1828123   | 0.104706314 | 0.08512548  |
| 1.2571080   | 0.0447011   | 0.1269524   | 0           | 0           | 0.1172255   | 0.03118786  | 0.02438313  |
| 0.3083923   | 0           | 0.7783471   | 0           | 0.04709162  | 0           | 0.07616647  | 0           |
| 0.04151912  | 0.6403549   | 0           | 0.1189822   | 0.1080428   | 0           | 0           | 4.242397    |
| 0.04075729  | 0.5240536   | 0.0658307   | 0.6617881   | 0.03500447  | 0.044579493 | 0           |             |
| 0.07487339  | 0.0480620   | 0.165584979 | 0.08480418  | 0.03734461  | 0           | 0.02701879  |             |

|             |             |             |            |             |             |            |             |            |           |
|-------------|-------------|-------------|------------|-------------|-------------|------------|-------------|------------|-----------|
| 0           | 0.04870196  | 0.04487118  | 3.4673810  | 0.1549149   | 0           | 0          | 9.652045    |            |           |
| 0.03128076  | 0           | 0.5864392   | 0          | 0.09707769  | 0.03482173  | 0          | 0           | 0.2361218  |           |
| 0           | 0.1221726   | 0           | 0          | 0.06159136  | 0.2559153   | 0          | 0.029316553 | 0          |           |
| 0.03625402  | 0           | 0.04388589  | 0.03170422 | 0.1456715   | 0.02382608  | 0.1203645  |             |            |           |
| 0.02433447  | 0.039484542 | 0.5573383   | 0          | 0           | 0           | 0.0213173  | 0.08234121  | 0          |           |
| 0           | 0.02725455  | 0           | 0.2215587  | 0.04143843  | 0           | 0          | 0           | 0.08266442 | 0         |
| 0.03722198  | 0.119088602 | 0.1386657   | 0          | 0           | 0.05432652  | 0.06627247 | 0           | 0          |           |
| 0           | 0.2004611   | 0.02143504  | 0.04591787 | 0.124907798 | 0.1112565   | 0.6849150  |             |            |           |
| 0.04483199  | 0           | 0           | 0          | 0.01638329  | 0.03688272  | 0          | 0           | 0.06931932 |           |
| 0.09793006  | 0           | 0           | 0          | 0.089279271 | 0           | 0.8528448  | 0           | 0          | 0.1691127 |
| 0.09217621  | 0           | 0           | 0          | 0           | 0.324583016 | 0.1021074  | 0           | 0.08705624 |           |
| 0.01846547  | 1.0886380   | 0           | 0          | 0.1452375   | 0           | 0.1057961  | 0           | 0.05224404 |           |
| 0           | 0.02140813  | 0.04056656  | 0.3270395  | 0.3909903   | 0           | 0          | 0.03910236  |            |           |
| 0.3038448   | 0           | 0           | 0.0517480  | 0           | 0           | 0          | 0.1349916   | 0.06956829 |           |
| 0.09892816  | 0.1873196   | 0           | 0.03450212 | 0.03158461  | 0.1600653   | 0          | 0           | 0          |           |
| 0.2445161   | 0           | 0.02007067  | 0.07275568 | 0           | 0.1520216   | 0          | 0.1033559   |            |           |
| 0.1042246   | 0           | 0           | 0.02509267 | 0           | 0.1346395   | 0          | 0           | 0.02949038 | 0         |
| 0.03084593  | 0           | 0           | 0          | 0.04435272  | 0.05967059  | 0          | 0.06693915  | 0.04609647 |           |
| 0           | 0.39159235  | 0.02966237  | 0          | 0.08377538  | 0           | 0          | 0.06211113  | 0.7395415  |           |
| 0.04659869  | 0.02659579  | 0           | 0.2784485  | 0           | 0.1634874   | 0          | 1.0195060   | 0          |           |
| 0           | 0.01929663  | 0           | 0.0238412  | 0           | 0.02235955  | 0          | 0           | 0          | 0         |
| 0.02326337  | 0.6095617   | 0.09015082  | 0.1168719  | 0           | 0.03121011  | 0.07868288 |             |            |           |
| 0           | 0.03135447  | 1.0460990   | 0          | 0.1015043   | 0.02835617  | 0          | 0.1798288   | 0          |           |
| 0           | 0           | 0           | 0.1158657  | 0           | 0.04565479  | 0.02896238 | 0.08601645  | 0          |           |
| 0.0235490   | 0.1166328   | 0.2883824   | 0          | 0.02147859  | 0.2299346   | 0          | 0           |            |           |
| 0.2182582   | 0.04032672  | 0           | 0          | 0.03764554  | 0           | 0          | 0           | 0.02593573 | 0         |
| 0.03693971  | 0           | 0           | 0          | 0.1506453   | 0           | 0.05355353 | 0           | 0.0874645  |           |
| 0.2103387   | 0.03099593  | 0           | 0.1626795  | 0           | 2.07738     | 0.04667565 | 0           | 0          | 0         |
| 0           | 0           | 0           | 0.3266226  | 0.09362661  | 0.09185487  | 0.1817937  | 0.026728375 | 0          |           |
| 0.06527033  | 0           | 0.3936811   | 0          | 0           | 0.4666483   | 0          | 0.0314040   | 0.02640999 | 0         |
| 0.1308493   | 0.05252027  | 0           | 0          | 0           | 0           | 0.03492674 | 0.7485050   | 0          | 0         |
| 0           | 0.07129862  |             |            |             |             |            |             |            |           |
| AL355102.1  | 0.09656405  | 0.06616724  | 0          | 0.343990869 | 0.033991509 | 1.798147   |             |            |           |
| 0.2105061   | 0.1010035   | 0.1137745   | 0.02796493 | 0.1223666   | 0.274203493 |            |             |            |           |
| 0.7519530   | 0.092288029 | 0.118159049 | 1.8181450  | 0.05058936  | 0           | 0.2144557  | 0           |            |           |
| 0.136663284 | 0           | 0.1350739   | 0.03503854 | 0.04370595  | 0.2082776   | 0          |             |            |           |
| 0.1003787   | 0           | 0           | 0.04063183 | 0.101752109 | 0           | 0.6356565  | 0           | 0          | 0         |
| 0           | 0           | 0           | 0          | 0.04632391  | 0.1253057   | 0          | 0           | 0          | 0         |
| 0.02728021  | 0           | 0           | 0          | 0.08530061  | 0           | 0.06639088 | 0.0691268   | 0          | 0         |
| 0.04701199  | 0           | 0.05569014  | 0          | 0           | 0           | 0.03638637 | 0           | 0          | 0         |
| 0.02985947  | 0           | 0.04902566  | 0          | 0           | 0           | 0          | 0.08200663  | 0          |           |
| 0.09163251  | 0           | 0.2830151   | 0          | 0           | 0           | 0          | 0           | 0.1278733  |           |
| 0.05395415  | 0.06714883  | 0           | 0.1323747  | 0.3208060   | 0.04684959  | 0.07325539 |             |            |           |
| 0.04211444  | 0           | 2.1258410   | 0.04321774 | 0           | 0.1155684   | 0          | 0           | 0.2577941  | 0         |



|                                                     |                            |                    |                   |            |                           |             |             |             |            |           |            |   |
|-----------------------------------------------------|----------------------------|--------------------|-------------------|------------|---------------------------|-------------|-------------|-------------|------------|-----------|------------|---|
| 0.1012552                                           | 0                          | 0                  | 0                 | 0          | 0.07569387                | 0.09783372  | 0.09957529  | 0           | 0          |           |            |   |
| 0.09888915                                          | 0                          | 0                  | 0                 | 0          | 0                         | 0.07219748  | 0           | 0           | 0.2547813  | 0         | 0          |   |
| 0.04058692                                          | 0                          | 0                  | 0                 | 0          | 0                         | 0           | 0.09720077  | 0.2596249   | 28.8509    | 0         | 0          |   |
| 0.3388206                                           | 0                          | 0                  | 0                 | 0          | 0                         | 0           | 0           | 0           | 0          | 0.1098369 | 0          | 0 |
| 0.0554840                                           | 0                          | 0.09888635         | 0                 | 0          | 0.01789546                | 0.0452021   | 0.1096638   | 0           |            |           |            |   |
| 0.06440146                                          | 0                          | 0.03573468         | 0.1309282         | 0          | 0                         | 0.0852505   | 0           | 0.04094107  |            |           |            |   |
| 0                                                   | 0                          | 0.06224773         | 0                 | 0          | 0.0385920.3725290.1560181 | 0.05591388  |             |             |            |           |            |   |
| 0.044722948                                         | 0                          | 0                  | 0                 | 0          | 0                         | 0.1502474   | 0           | 0           | 0          | 0         | 0          |   |
| 0.1114178                                           | 0                          | 0.05059165         | 0                 | 0          | 0                         | 0.09215242  | 0.0492211   | 0           | 0          |           |            |   |
| 0.3237182                                           | 0.06941978                 | 0                  | 0                 | 0          | 0                         | 0.044704331 | 0.048008474 | 0.04575433  |            |           |            |   |
| 0                                                   | 0.09038009                 | 0.1905275          | 0                 | 0          | 0                         | 0.03641441  | 0.03716431  | 0.060947517 |            |           |            |   |
| 0                                                   | 0                          | 0                  | 0                 | 0          | 0.04715103                | 0           | 0           | 0           | 0.03529384 | 0.1271394 |            |   |
| 0.046968844                                         | 0                          | 0                  | 0.03215874        | 0          | 0.03275134                | 0           | 0           | 0           | 0          | 0         | 0          |   |
| 0.206836094                                         | 0.03886725                 | 0                  | 0.02618241        | 0          | 0                         | 0           | 0           | 0           | 0.03126518 |           |            |   |
| 0.2718936                                           | 0                          | 0                  | 0                 | 0          | 0.077999016               | 0           | 0           | 0           | 0          | 0         | 0          |   |
| 0                                                   | 0.045511024                | 0.056629586        | 0                 | 0          | 0                         | 0.04640571  | 0           | 0.04429968  |            |           |            |   |
| 0.04822778                                          | 0                          | 0.3706876          | 0                 | 0          | 0.09743391                | 0.1665637   | 0.2689068   |             |            |           |            |   |
| 0.04907771                                          | 0                          | 0.06924491         | 0                 | 0          | 0                         | 0.04735947  | 0.0314613   | 0           | 0          | 0         |            |   |
| 0.5881341                                           | 0                          | 0                  | 0                 | 0.03217524 | 0.034806486               | 0           | 0.1498729   | 0           | 0          |           |            |   |
| 0.04654236                                          | 0.061626938                | 0.05797377         | 0                 | 0          | 0                         | 0.03358793  | 0           | 0           | 0          | 0         |            |   |
| 0.0427977                                           | 0.03189326                 | 0.104836884        | 0                 | 0.0677111  | 0                         | 0           | 0.140649039 | 0           |            |           |            |   |
| 0.5282511                                           | 0                          | 0                  | 0                 | 0.05082572 | 0                         | 0           | 0.1080537   | 0.05954092  |            |           |            |   |
| 0.08105853                                          | 0                          | 0                  | 3.9161360         | 0          | 0.08701306                | 0.1292117   | 0           | 0           | 0          | 0         |            |   |
| 0                                                   | 0                          | 0                  | 0                 | 0          | 0                         | 0.05241538  | 0           | 0           | 0          | 0         | 0.05120823 |   |
| 0.07791996                                          | 0.05892381                 | 0                  | 0                 | 0          | 0                         | 0           | 0.1041423   | 0.08044671  |            |           |            |   |
| 0.06890192                                          | 0                          | 0                  | 0                 | 0          | 0                         | 0.04274775  | 0           | 0           | 0          | 0         | 0          |   |
| 0.03158519                                          | 0                          | 0                  | 0                 | 0          | 0.120452005               | 0.042388431 | 0           | 0           | 0          | 0         |            |   |
| 3.9994680.1401974                                   | 0                          | 0.04717427         | 0                 | 0          | 0                         | 0.03944729  | 0           | 0           | 0          | 0         | 0          |   |
| 0                                                   | 0                          | 0                  | 0                 | 0          | 0.0521826                 | 0.03570098  |             |             |            |           |            |   |
| AC005180.1                                          | 5.19614475.858990.5252532  | 68.847399161       | 1.544963297       | 3.483634   |                           |             |             |             |            |           |            |   |
| 35.2606763.6373452.7820837.189076.1370949.067867479 | 9.7100588.027643532        |                    |                   |            |                           |             |             |             |            |           |            |   |
| 64.58489064                                         | 1.3026571.2289680.04847835 | 1.2884390.1466668  | 0                 | 0.3061361  |                           |             |             |             |            |           |            |   |
| 0.1323126                                           | 0.0274578                  | 0.03424997         | 1.5668720.3206482 | 0          | 0.1694158                 |             |             |             |            |           |            |   |
| 0.069988202                                         | 6.2089870.106316797        | 0.05919652         | 0.09962589        | 1.10578    | 0.082363157               |             |             |             |            |           |            |   |
| 2.7466290.2526718                                   | 0.3253844                  | 6.8737460.4177178  | 0                 | 0.3611832  |                           |             |             |             |            |           |            |   |
| 3.3397410                                           | 0.5098893                  | 0.2216574          | 0                 | 0.1806516  | 0.8028414                 | 0.1058861   |             |             |            |           |            |   |
| 0.1282681                                           | 0.2701064                  | 0                  | 0.1591867         | 0          | 0.03769417                | 0.02601346  |             |             |            |           |            |   |
| 0.1625128                                           | 5.1134090                  | 2.3209670.08225902 | 0.4364134         | 0          | 0.414621219               |             |             |             |            |           |            |   |
| 0.0422647                                           | 0.05702804                 | 0                  | 1.364901659       | 0.07756004 | 0.0891409                 | 0.09300295  |             |             |            |           |            |   |
| 0.127072038                                         | 0.2807909                  | 0.3474193          | 0.4610250.0431537 | 3.65558    | 0.04804995                |             |             |             |            |           |            |   |
| 2.0802050.4371202                                   | 2.9665580.2142138          | 0.146969724        | 0.1914864         | 0.2712251  |                           |             |             |             |            |           |            |   |
| 0.2534670.1557830.1202352                           | 0.06275322                 | 0.850340325        | 0.02863794        | 0.06803675 |                           |             |             |             |            |           |            |   |
| 0.03586692                                          | 0.123257347                | 0.1503110.5073713  | 0.7366925         | 0.07472242 |                           |             |             |             |            |           |            |   |
| 0.1556023                                           | 0.09427433                 | 0.1839928          | 0.1101404         | 0          | 0.0330028                 | 0.277770497 |             |             |            |           |            |   |

2.2489730.812817461 0.05543494 0.2264116 4.4232780.05179239 0.126262  
0.0977503 0.1586964 0.2056609 0.03501564 0.03179625 0.08621015  
0.3559030.03833348 0.1560635 0.6237184 0.1370892 1.9373510  
19.490570.367344132 0.02476631 1.1458050.08486586 2.9553890.324870019  
0.06655274 1.4507140.3864964 0.06361153 0.1897277 0.8026282 0  
0.04586184 0.02417095 0.03647229 0.1142564 0.07629523 1.384217  
0.03682284 0.03755268 0.3186184 0.05178003 0 0.2049558 0  
0.2289591.0721160.032015021 0.1438181 0.1454575 0.1153077 6.452823  
0.3442929 0 0.276085015 0 0 0.04419801 0 0.1866066 3.086647  
0.7713034 0.03542243 10.627610.418320899 0.1009359 0.08704563  
0.02800333 0.3420043 0.02509413 1.7770460.2004185 0 4.716244  
0.3787246 3.87959 17.934840.1472978 0 4.5061260 0 0 0.210281663  
2.2036510.6120218 1.4208 0.1279033 1.0921970.3237870.031793585  
0.1089814 0.03932954 0.07569818 0.1081065 13.306936312 1.047745  
1.1382530.3171674 0.07916245 0 0.2277474 0.07221484 0.0771438 0  
1.7840790 0.08160077 0 0.237736502 0 0 0.105097064 0.902919169  
2.3664420 0.07082597 10.302120.02712681 0.044175003 0 0 0.1164946  
0.191045029 0.9615834 0 2.2545640.1521592 0 0.2586479 0.4281193  
0.0271909 0.05698984 0.02765786 0.3487127 0.147227724 0.06150023  
0.282075678 10.937264.2262130.0513309 0 0 0.03114756 2.301511  
1.5380140.0398758 3.30655862 0.5482468 0.1777635 0.2667305  
0.03018527 0.6612871 0 1.1055670.1164555 0.5390182 0.08522728  
0.04061493 2.5282760.06280812 0.1810772 0 0.2695942 0 0.1296114  
0.02362663 0.08564596 0 0.1431644 0.05496997 0.4055588 0.08179352  
0.035664517 0.044377529 0.8566131 0.06540631 25.438272.6183260.4445873  
8.2622290.5291088 0 1.5613720.2179517 1.0291410.02545122 0.3132647  
3.0204290 0.1575978 0.1085269 0.2693259 0.296338869 0.1396708  
0.03711304 4.3391940.08245029 0.04446541 0 0.6145183 0 0.1252313  
0 0.07564196 0.081827855 7.42868 0.05872364 0.5793752 0.6809565 0  
1.110754694 1.1584880 0.05613038 0.4541365 0.6053839 0 0.46597858  
0.8784064 0.2250859 0.03353823 0.1999441 0.082154969 0 0  
0.6878918 0.046508745 0.293917356 0.1481973 0.02435069 0.03690961  
0.1539299 0.03952627 0.3384536 0 0.03338009 0.7729910.1693516  
0.04665899 0.09528175 0.57573274 0.07721889 0.4773787 0.3534798  
0.9405121 1.2614673.4089580.1416907 0.02772122 0 0.04576564  
0.1851686 0.1973381 0.2022720.1353363 0.1817590.02167034 0.9135198  
0 0.1132493 0.02053754 0.7090445 0.09248435 0.08890809 0  
0.1203873 0.1831849 0.09235078 0.0434844 0.1843955 0.05710105  
0.1574379 0.04433387 0.08161067 0.03152086 0.02699735 21.10696  
0.1485629 0.03648755 0.03113254 0.1436263 0.0350545 0.4019891  
0.4120895 0.7257285 0 0.4043486 0.7909854 0.053903218 0.7672995  
0.1048612 0.2571675 0 9.2021040.18878338 0.830437737 0.3073376  
0.264018389 0 0.04054814 0 0 0.8928921 0.1109037 1.243564  
0.5892052 0.05134405 1.0201190 0 0.3265071 0.07776086 0.2055739

0 0.8828174 0.1980829 0 0.1858502 2.7398090.4476306  
LINC00685 1.1070270.5689146 1.2006370.073941963 0.47492809 1.503124  
0.6221733 0.1628327 0.4891241 0.1803346 0.4603044 0.117881876  
1.40552 1.53741506 1.015946962 1.5632651.7398967.9120510.6914693  
3.2519711.982894848 1.1996122.4316462.4854440.3288158 3.5815960.623004  
2.6970910.5808825 1.487821632 0.9607339 3.535965021 5.03364 1.275273  
0.4666377 0.866031914 1.5538836.6535345.2659053.6993241.6614040.7268691  
2.2291254.4310770.6733717 2.8438641.6068681.0434370.8140777 1.439891  
0.6292967 0.7329963 1.54354 0.596801375 1.9103331.0543 5.169738  
0.3924508 0.6315089 1.2342911.06775 1.3137 0.2256357 1.07737  
0.3846147 2.085053902 1.6230441.5251671.1671680.571986631 0.9573591  
1.7115893.2738630.929486435 1.4120461.9059360.4215290.4734807 9.540462  
1.0544040.8981639 1.1133731.20959 2.1446910.13437886 0.6237291.285035  
2.8679378.17233 0.4617258 0.6885262.031510976 0.4713216 0.5287685  
7.0835495.324976586 0.7558864 1.21775 0.5051851 10.863030.4623835  
4.0082012.6496262.0140950.4330284 0.6336846 0.571441408 2.855978  
1.11477535 5.6261289.1914660.4918788 1.9178920.9351059 1.139545  
0.2720642 3.8924690.5282616 1.2210360.9458945 1.0575921.104058  
0.3745706 2.86239 9.8395630.1062827 0.8741844 3.8429670.50381076  
1.2228083.1026390.1163931 0.9537182 1.069338512 1.5973440.7235083  
2.1203120.5670789 0.8847163 1.6512018.7657113.6481590.9613601  
0.7003021 0.1044681 0.2441566 1.97755 3.1311461.3390860.7283061  
1.1717652.5076893.3731511.111806776 2.11961 3.2131 0.307359158 4.092852  
1.5959553.0047370.7955071 2.9512260.7387877 1.325272578 1.133014  
0.3511896 1.3941992.6569932.1498131.6933290.6539368 1.99185 0.6678902  
0.191241719 2.8378770.2984567 1.3442251.0788322.3059050.2658775  
3.7565991.2588241.2320583.1684561.9673690.9812258 0.8585774 0.8295237  
0.2488643 2.2688290.2235773 3.7859450.672934076 2.6305183.666787  
0.47239312.191613.9053530.3229617 0.436047533 2.39148 7.4437590.3460656  
0.3706688 2.823266448 1.7363479.5617941.1418581.6285642.0139111.735303  
0.5942539 0.3703083 5.83557 3.11418 1.8555810.6341854 1.475663  
0.570595377 1.542544804 11.707251.153121056 0.257989463 2.7538120.415971526  
6.2167991.4334084.8365590.908787163 6.3050063.1309584.7931541.113573798  
0.4945527 3.9295591.2181093.5178442.1794132.4324640.5871636 4.027557  
0.3908065 1.3276422.2546443.028832028 2.5304180.628656396 4.63146  
0.4584590.7392009 11.6781 1.6308986.7922796.6918033.1395410.6015842  
0.800281711 0.7936911 0.3047523 1.0130392.0699481.7314540.5230608  
1.1793290.6388725 0.4368362.8637761.2811731.4278021.2059750.6953702  
1.970021887 2.3193231.4803791.0665680.9721144 3.1715020.9365075  
1.0799210.4900419 3.3373323.3653831.418497817 0.852090039 2.795311  
2.0632021.4129291.69576 1.3303620.3332826 1.0366722.7183950.09960065  
0.4981995 2.1478780.9773744 1.1099061.1560481.3977970.2161446  
1.4884420.4155517 0.903171942 6.8481950.8144058 0.5410167 1.526583  
1.2196826.7687350.2809363 0.07523292 1.5457872.8352716.5012030.561132601

1.7420580.4832352 0.7378525 0.6670919 0.2501108 0.894166555  
0.4361578 0.1429803 3.9646012.3668150.7219836 0.65316 1.780315024  
0.7744695 7.6147073.8637920.9255006 0.56337578 0.7570222 3.202039  
2.3900491.02058442 0.806212562 0.3302842 1.1354930.1518641 2.586148  
1.0299920.8355375 3.3867980.6409289 0.8057167 2.6710471.535822  
0.9583088 1.994816244 0.7942901 1.68357211.3321 1.0319260.7949091  
2.1756672.0890280.6083125 3.3910840.4393715 4.8251993.1575645.097502  
1.0208721.3087280.8024608 1.3703460.6510693 2.27804 1.57736 1.580233  
0.5496483.2923 1.5789780.4402951 1.4655517.9161660.1789159 0.3371967  
1.4488061.9433286.0195660.3357859 1.21046 0.1481069 1.1296822.852546  
4.2536123.5439461.6415241.0576960.6891576 0.7158933 4.34803510.10936  
10.183781.31084 2.143912333 0.4413071 2.1093112.3177695.7836380.3668792  
1.078814684 0.592249567 0.9484022 0.362099987 1.1440679.3983580  
2.8629090.8163982 0.6591171 2.5583132.2222532.8167251.1871052.464564  
0.740978281 5.9493825.3324331.2969411.4350353.59565 0.9314393 2.522881  
2.1410993.4772144.604425  
AL513320.1 0.1666325 0.2936038 0.1101549 0.101759357 0.075415245  
0.07387887 0.3113595 0.2614398 0.1262129 0.04136292 0.1809925  
0.202787149 0.1208928 0.511886977 0.393230275 0.07683479 0.6734403  
1.7385180 0.9227592 0.960158444 0.5778197 0.5244430.3368657  
0.6141318 0.3696760.7312962 1.4847010.1598828 0.561424655 0.4807882  
0.903009067 1.4804360.2193798 0.5217790.621828591 1.03683 0.9538159  
0.6755650.5747939 0.5124767 0.5314208 1.0225781.47313 0.1390047  
1.9247910.9562731 1.0203040.7550107 0.5245376 0.6328767 0.2421009  
0.5098149 0.315892887 1.0516050.5046724 0.8181817 0.1718478  
0.7412794 0.7335029 3.2603290.3824448 0.2717060.6177845 1.36108  
0.391290443 0.5982971.1302 0.7332939 0.500927199 0.4025765 0.9253743  
1.5213410.319791153 0.9716328 0.6557399 0.5801107 0.4887052  
1.4402410.6801926 1.1997040.5303872 0.2648298 0.20216 0 0.1581225  
0.7911590.2093038 1.6906971.4297171.4509410.854265244 0.3243177  
0.1926251.5908881.0468948 0.8511180.07980357 0.9435383 2.291828  
0.5629116 1.8090471.6061660.4504189 0.5146721 0.7163518 0.471852584  
1.0219080.319616727 0.5754717 1.1110910.5641054 0.7331705 0.476629  
0.4151245 0.1497665 0.4269943 0.6278608 0.6001415 3.173005  
0.4478351 0.07235291 0.1472818 0.7697361 2.7600030.1097002  
1.3701490.8555273 0.99049612 0.2337271 0.7486135 0.2936650.1640641  
1.655583581 0.6908859 0.4563608 2.3708630.3902086 0.03581034  
1.3526151.4954650.6059367 0.3193519 0.6883999 0.1078272 0.7680223  
0.1632909 0.7297671 1.4884630.5011495 0.5130968 0.6830295  
1.0831680.170008324 0.1080377 2.4357850.211494726 0.74649 0.2059089  
1.0881940.4447551.0966030.3631157 0.325687106 0.3692986 0.7249638  
1.5433060.6094282 0.5283187 0.8415222 0.8470133 0.6351549  
0.2703395 0.438646602 1.0478180.4518116 1.2156690.1291039 0.4025954  
0.3659021 0.8511344 0.6929603 0.1816678 0.3931551 0.8922459

|             |             |               |             |             |                       |
|-------------|-------------|---------------|-------------|-------------|-----------------------|
| 0.4910432   | 0.7297989   | 0.6088509     | 0.7705992   | 1.7448570   | 0.9230651             |
| 2.8118750   | 0.3968981   | 187 2.5032841 | 0.39836     | 0.3656868   | 0.7845902 0.8466788   |
| 0.8889236   | 0.1200182   | 28 1.0627731  | 0.8558230   | 0.1190644   | 0.3060699 0.624438583 |
| 0.1853978   | 3.6254381   | 5340170       | 0.3486372   | 2.1731520   | 0.5015081 0.1703783   |
| 0.1092044   | 2.0077360   | 0.5612296     | 0.7581182   | 0.3080363   | 0.9428786             |
| 0.560897614 | 0.1974752   | 64 2.3539650  | 0.165305403 | 0.142018637 | 1.0151280             |
| 0.5681451   | 0.0802684   | 2240640       | 0.875474707 | 1.4461640   | 0.8348384 2.2537580   |
| 0.1701516   | 2.5863781   | 1.1928011     | 1.1487781   | 0.0642751   | 0.0809870             |
| 0.05378302  | 0.2349140   | 0.6581813     | 1.354696254 | 0.8125544   | 0.266203253           |
| 1.2129330   | 0.7210673   | 0.3148763     | 1.6071460   | 0.08312781  | 2.7337242             |
| 1.2151840   | 0.7150077   | 1.040166083   | 1.1785152   | 0.22283     | 0.3291743 0.9115756   |
| 0.8510133   | 1.1097520   | 0.6569282     | 1.9049770   | 0.1618551   | 3.3781250             |
| 0.8070326   | 0.1778217   | 0.3417759     | 1.470946081 | 0.6244955   | 0.7470125             |
| 0.7339087   | 0.8472922   | 2.3843860     | 0.2653468   | 0.7768742   | 0.07781521 0.8802974  |
| 1.4280330   | 0.201946025 | 0.586325622   | 1.8398334   | 0.19736     | 0.5609079 0.51479     |
| 0.6102842   | 0.36038     | 0.3745019     | 0.3810349   | 0.3426775   | 0.27425 0.8867766     |
| 0.3602862   | 0.5912745   | 0.19887       | 0.1451817   | 0.2974595   | 0.7681509             |
| 0.09531411  | 0.932212841 | 2.1089850     | 0.2101481   | 0.3722752   | 0.5835810             |
| 2.1045390   | 0.1449848   | 0             | 1.0045680   | 0.5513577   | 1.4515070             |
| 0.4433540   | 0.6639395   | 0.1224074     | 0.5507263   | 0.091152384 | 0.06431174            |
| 0.09838516  | 1.0064660   | 0.6857314     | 0.2732395   | 0.3495655   | 0.18846768            |
| 0.5625211   | 2.9030781   | 0.5509        | 0.5424930   | 0.180908235 | 0.6250910             |
| 1.2983680   | 0.790050479 | 0.277378598   | 0.3146809   | 0.04596095  | 0.2438289             |
| 1.1621460   | 0.8579489   | 0.1916452     | 0.9021157   | 0.3150179   | 0.6127756             |
| 0.6792442   | 0.4623515   | 0.4496012     | 0.343159707 | 0.4008058   | 0.7079546             |
| 1.4177550   | 0.3550357   | 0.4182782     | 1.0511430   | 0.4345828   | 0.4709043 0.9333658   |
| 0.8206176   | 2.3299880   | 0.2172729     | 0.5249478   | 0.1277209   | 2.0154940             |
| 1.91282     | 0.4032024   | 1.7456540     | 0.3294922   | 2.0910831   | 0.6292310             |
| 0.6816787   | 0.2593156   | 1.9173920     | 0.4514128   | 0.5220585   | 1.0777590             |
| 0.5020704   | 0.2567281   | 0.1189887     | 0.2293038   | 0.4858358   | 1.215095              |
| 2.4448421   | 0.10577060  | 0.6325408     | 1.3563610   | 0.3793691   | 0.4926082 3.604693    |
| 5.9168342   | 0.6364810   | 0.3421351     | 0.559570865 | 0.3270235   | 1.8802520             |
| 1.4286240   | 0.1767154   | 0.326627623   | 0.125393428 | 0.5438319   | 0.581378114           |
| 0.6122944   | 0.8035964   | 2.9578061     | 0.0783030   | 0.1404415   | 0.2791018 0.7921722   |
| 0.7877383   | 0.4199426   | 0.6418112     | 0.5550131   | 0.708151805 | 0.8363651             |
| 1.2475490   | 0.3880126   | 0.5716827     | 0.9846214   | 1.1483260   | 0.4156624 1.087433    |
| 1.5436651   | 0.821783    |               |             |             |                       |
| AC079313.1  | 0.2982992   | 3.0659910     | 0.06274392  | 3.1299389   | 0.171825209 1.178273  |
| 1.7734943   | 0.1484962   | 0.2525695     | 0.2539240   | 0.3092783   | 0.323419505 0.9915864 |
| 0.427635005 | 3.633498955 | 0.6127082     | 0.08524214  | 0           | 0.2409026 0.02628005  |
| 0.057568783 | 0.2350888   | 0.2275971     | 0.2066375   | 0.03682186  | 0.9475485             |
| 0.05745437  | 0.05637876  | 0.1366031     | 0           | 0.4107833   | 0.142875366 0.190925  |
| 0.03570232  | 0.5029602   | 0.088547936   | 0.3691097   | 0.05432907  | 0.349818              |
| 0.4677156   | 0           | 0.2492788     | 0.1294350   | 0.5463846   | 0.1055689 0.03654518  |

|             |             |             |             |            |             |             |
|-------------|-------------|-------------|-------------|------------|-------------|-------------|
| 0.03404315  | 0.04304907  | 0           | 0.1327889   | 0.03794576 | 0.04596666  | 0.09679636  |
| 0.107958998 | 0.08557013  | 0.03593249  | 0           | 0.1957680  | 0.08735805  | 1.055498    |
| 0.4708075   | 0.3564646   | 0.04421799  | 0.1407553   | 0.08614082 | 1.040096818 |             |
| 0.2726306   | 0.03065518  | 0.3182339   | 0.366848568 | 0.3335366  | 0           | 0.06665779  |
| 0.227690129 | 0.2012506   | 0           | 0.1652147   | 0.1855767  | 0.2670930   | 0.4141501   |
| 0           | 0.3016925   | 0.06908984  | 0           | 0.2573318  | 0.3976252   | 0.06812505  |
| 0.2068222   | 0.1686637   | 0.20643084  | 0           | 0.04876383 | 0.03856022  | 0.198769403 |
| 0.1615981   | 0           | 0.05657228  | 0.1606669   | 0.1115244  | 0.3716297   | 0.1978091   |
| 0.03947035  | 0           | 0.1064431   | 0.238902977 | 3.0447030  | 0.109231651 | 0.05959764  |
| 0.0973653   | 0.5141005   | 0           | 0.1357432   | 0.1050905  | 0           | 0           |
| 0.03418388  | 0.1390257   | 0.06377139  | 0.08242401  | 0.3355651  | 0.05158111  | 0           |
| 0.1666264   | 0.4187688   | 1.0632130   | 0.394928581 | 0.1065042  | 0           | 0.06082571  |
| 0.2616611   | 0.139706008 | 0.3219763   | 0.2363107   | 0.06925317 | 0.03419411  |             |
| 0.08158987  | 0.1849069   | 0.02839376  | 0           | 0.02598599 | 0.1960553   | 0.08189076  |
| 0           | 4.278461    | 0.03958792  | 0           | 0.05709066 | 0           | 0.0409528   |
| 0.04268973  | 0.172095395 | 0.03865441  | 0.1563802   | 0          | 0.4676883   | 0           |
| 0.4136593   | 0.408122926 | 0.1402343   | 0           | 0          | 0.08331085  | 0.08024767  |
| 0.3618422   | 0.03808236  | 1.8170180   | 0.449733274 | 0          | 0.04679101  | 0.1806369   |
| 0.03676859  | 0.1079140   | 0.1389445   | 0.1436455   | 0          | 0.3794173   | 0.08143273  |
| 0.2803976   | 2.3949030   | 0.1187689   | 0.1300499   | 0.9428889  | 0           | 0           |
| 0           | 0.4387271   | 2.6319180   | 0.3093925   | 0.0838723  | 0.7278469   | 0           |
| 0.1171650   | 0.02712749  | 0.3486731   | 1.264634265 | 0.4693423  | 0.254943    |             |
| 0.2131150   | 0.1134758   | 0.03587888  | 0.02720548  | 0.03881878 | 0.04146833  |             |
| 0.09335516  | 0.2324907   | 0.2727296   | 0           | 0.2065619  | 0.447279892 | 0.056240666 |
| 0.1191832   | 0           | 0           | 0.2698332   | 0          | 0.2665054   | 1.17713     |
| 0.05491539  | 0.1533940   | 0.09393177  | 0.051347725 | 0          | 0           | 0.2938015   |
| 0.2204393   | 0.03972431  | 0.07671124  | 0.1461636   | 0.3676158  | 0.05946947  | 0.1402158   |
| 0.1606706   | 0.039570821 | 0.1983551   | 0.075814296 | 0.3793082  | 0.6417466   |             |
| 0.05518541  | 0           | 0           | 0.1004594   | 0.1484601  | 0.07690725  | 0.2143507   |
| 0.45306954  | 0.2292171   | 0.04777801  | 0           | 0.03245192 | 0           | 0.1025046   |
| 0.1320651   | 0.1252003   | 0.2897470   | 0.04581357  | 0.04366477 | 0.07994494  |             |
| 0.1350490   | 0.098570186 | 0.0526979   | 0.07736293  | 0          | 0.02540079  | 0.04603862  |
| 0           | 0.4617446   | 0.05909776  | 0.3924116   | 0.04396776 | 0.268398349 | 0.095419816 |
| 0.1587823   | 0           | 1.9595480   | 0.4300602   | 0.08690402 | 0.6717973   | 0.2234730   |
| 0.9759404   | 0           | 0.1924211   | 0.1094496   | 0.1122627  | 0.4531030   | 0.2067376   |
| 0.08471602  | 0.2041837   | 0.2171625   | 0.318591421 | 0          | 0.03989992  | 0.3975878   |
| 0           | 0.04780439  | 0.07860585  | 0.4404423   | 0.05897379 | 0.06731755  | 0.04831565  |
| 0.1355367   | 0.175944874 | 1.7793780   | 0.1262666   | 0.1334746  | 0.03486146  |             |
| 0.07842303  | 0.181720459 | 0.4884237   | 0.3362394   | 0.2413812  | 0.09764766  |             |
| 0.1414876   | 0           | 0.071567092 | 0.4721837   | 0.1209940  | 0.03605667  | 0.05373956  |
| 0.35329646  | 0.1186833   | 0           | 0.04930311  | 0.05000116 | 0.039498509 | 0.1792413   |
| 0.2356130   | 0.03968121  | 0.2068609   | 0.04249436  | 0.07277371 | 0           | 0.2153199   |
| 0.2991730   | 0.1003254   | 0.1024366   | 0.065154255 | 0.04150869 | 5.05894     |             |
| 0.0950058   | 0.08666885  | 0.2199231   | 0.3265789   | 0.03808263 | 0.02980286  |             |

|             |             |             |             |             |             |            |
|-------------|-------------|-------------|-------------|-------------|-------------|------------|
| 0.1181428   | 0.1476068   | 0.1658943   | 0.1767971   | 0.2174609   | 0           | 0.04885189 |
| 0.2096784   | 0.1841470   | 0.0510362   | 0.08116894  | 0.1545582   | 0.1905719   |            |
| 0.4971457   | 0           | 0.03992689  | 0.08628494  | 0.09847028  | 0           | 0.04674971 |
| 0.1321613   | 0.1534721   | 0.06770407  | 0.04766297  | 0.05849263  | 0.169439    |            |
| 0.02902462  | 6.6415350   | 0.1064791   | 0.03922745  | 0.03347034  | 0           | 0.03768679 |
| 0.1772136   | 0.2053223   | 0.1366302   | 0.03951925  | 0.2834606   | 0.057950895 |            |
| 0.1862716   | 0.03757846  | 0.03949694  | 0.5812428   | 0.2300722   | 0.169132852 |            |
| 0.357118646 | 0.1239060   | 0.141921973 | 0.04982301  | 0.1743719   | 0           | 0.448837   |
| 0.05333004  | 0.07948778  | 0.3676599   | 0.3167248   | 0.07359941  | 0.1329359   |            |
| 0.3512598   | 0.290420059 | 0.3510250   | 0.2926002   | 0.1326065   | 0           | 0.08628269 |
| 0           | 0.07992241  | 0.4396336   | 0.240622    |             |             |            |
| GNG12-AS1   | 0.2734820   | 0.6675921   | 0.1384169   | 0.840270915 | 0.03610065  | 0.3779656  |
| 0.5589195   | 0.6503282   | 0.7627655   | 0.5643024   | 0.1786942   | 0.269376246 |            |
| 0.7855902   | 0.220532433 | 0.737257903 | 0.4275695   | 0.2686419   | 0.01642528  |            |
| 0.1613318   | 0.02898769  | 0.163286002 | 0.2963544   | 0.1748360   | 0.08838004  |            |
| 0.3017161   | 0.05530025  | 0.1629615   | 0.3775668   | 0.07175115  | 0.023713174 |            |
| 0.1941885   | 0.198120508 | 0.1103122   | 0.1293939   | 0.2017383   | 0.037208021 |            |
| 0.3373439   | 0.1027313   | 0.5512284   | 0.1768815   | 0.09907086  | 0.106618    |            |
| 0.3365310   | 0.2090926   | 0.1497159   | 0.04606908  | 0.06973687  | 0.03391745  |            |
| 0.06120778  | 0.08369726  | 0.05979331  | 0.05794585  | 0.04575828  | 0.14176434  |            |
| 0.04719322  | 0.1811869   | 0.08301421  | 0.1366139   | 0.04129653  | 0.2148311   |            |
| 0.07418785  | 0.2371630   | 0.01393537  | 0.05175246  | 0.2103924   | 0.039022391 | 0          |
| 0.2077121   | 0.8023352   | 0.147727572 | 0.1313932   | 0           | 0.1417993   | 0.0645812  |
| 0.4518991   | 0.07356966  | 0.03905074  | 0.2851133   | 0.3246741   | 0.08954069  |            |
| 0.08483802  | 0.07405182  | 0.1154529   | 0.1306426   | 0.082993004 | 0.1581421   |            |
| 0.1461975   | 0.0966137   | 0.06597737  | 0.1833197   | 0.1169401   | 0.176583264 |            |
| 0.1406937   | 0.01536799  | 0.2248178   | 0.083523305 | 0.1188317   | 0.05013921  |            |
| 0.1604595   | 0.06329301  | 0.03954049  | 0.1703559   | 0.1168872   | 0.1554893   |            |
| 0.1118387   | 0.09504616  | 0.089407629 | 2.0601950   | 0.126223241 | 0.08452029  |            |
| 0.1841089   | 0.1063253   | 0.05264439  | 0.1368950   | 0.0413993   | 0.2890083   |            |
| 0.07664948  | 0.1720263   | 0.1346638   | 0.00730236  | 0.1205859   | 0.2207964   |            |
| 0.5948654   | 0.1015992   | 0.1509563   | 0.2166143   | 0.05998892  | 0.2722469   |            |
| 0.480069029 | 0.1090861   | 0.3683094   | 0.06709261  | 0.2297181   | 0.02201428  |            |
| 0.07892214  | 0.1117105   | 0.1418641   | 0.07004611  | 0.01285659  | 0.01942456  |            |
| 0.04474168  | 0.07769379  | 0.1310324   | 0.1482891   | 0.09032799  | 0.0258501   |            |
| 6.9470040   | 0.04366668  | 0.06997912  | 0.09895714  | 0.1008777   | 0.02581267  |            |
| 0.03472123  | 0.267033277 | 0.07757516  | 0.1950791   | 0.092201411 | 0.2619129   |            |
| 1.6017120   | 0.01302273  | 0.2272304   | 0.08748915  | 0.1434019   | 0.052617501 |            |
| 0.1031218   | 0.1301378   | 0.1123127   | 0.2362999   | 0.1580636   | 0.4648035   |            |
| 0.1211623   | 0.2160308   | 0.1164683   | 0.070867061 | 0.1624441   | 0.4350146   |            |
| 0.04269599  | 0.1274644   | 0.1232835   | 0.1970486   | 0.06224639  | 0.2176875   |            |
| 0.2228423   | 0.3015479   | 0.2098734   | 0.6555922   | 0.01871511  | 0.1571108   |            |
| 0.2715362   | 0.02472775  | 0.05523295  | 0.3562997   | 0.112807667 | 0.08295931  |            |
| 0.05456927  | 0.02188141  | 0.1300074   | 0.05286497  | 0.09474476  | 0.026930497 |            |

|             |             |             |             |             |             |
|-------------|-------------|-------------|-------------|-------------|-------------|
| 0.06769533  | 0.03331377  | 0.1025912   | 0.1098849   | 0.211730434 | 0.09614406  |
| 0.03213827  | 0.2283559   | 0.03576208  | 0.1243801   | 0.1200339   | 0.1039873   |
| 0.05227522  | 0.1544604   | 0.4121426   | 0.3294794   | 0.1382385   | 0.1432162   |
| 0.251715957 | 0.310175793 | 0.2159745   | 0.02967387  | 0.082854451 | 0.109335    |
| 0.022020509 | 0.05999256  | 0.4215616   | 0.2022024   | 0.12722146  | 0.3807467   |
| 0.09185048  | 0.04440411  | 0.186096604 | 0.1119939   | 0.0211036   | 0.098379    |
| 0.1509799   | 0.1389436   | 0.4319116   | 0.1087905   | 0.3224457   | 0.07723645  |
| 0.2061608   | 0.3249117   | 0.031177011 | 0.08334923  | 0.125438199 | 0.2561562   |
| 0.2548317   | 0.2043533   | 0.1169586   | 0.08207222  | 0.3482594   | 0.07018113  |
| 0.05453423  | 0.1486165   | 0.1372938   | 0.1186769   | 0.007528656 | 0.1633661   |
| 0.05625     | 0.07129027  | 0.06999303  | 0.4439521   | 0.1775568   | 0.1950803   |
| 0.1443822   | 0.2476983   | 0.1826621   | 0.05320111  | 0.03681119  | 0.196742108 |
| 0.1868380   | 0.07314313  | 0.04940381  | 0.04002549  | 0.5586020   | 0.04763223  |
| 0.2000893   | 0.009312374 | 0.06870506  | 0.1247086   | 0.072502411 | 0.045107549 |
| 0.04503645  | 0.1662056   | 0.3624776   | 0.2464257   | 0.2738793   | 0.2293611   |
| 0.4641836   | 0.08705371  | 0.7074089   | 0.2830751   | 0.1212836   | 0.2414524   |
| 0.08402696  | 0.1308964   | 0.4560757   | 0.1802141   | 0.07354149  | 0.0969554   |
| 0.200809138 | 0.06506887  | 0.05658534  | 0.2464241   | 0.02793554  | 0.007532813 |
| 0.06812507  | 0.9716424   | 0.1300998   | 0.2704941   | 0.2131745   | 0.2861878   |
| 0.027724647 | 0.2151806   | 0.1492241   | 0.1892912   | 0.02197328  | 0.07414541  |
| 0.208624526 | 0.2462840   | 0.1103816   | 0.1521433   | 0.09232142  | 0.1917372   |
| 0.1703222   | 0.045108955 | 0.2072702   | 0.1016838   | 0.05113491  | 0.04234026  |
| 0.148455886 | 0.1215605   | 0.03595626  | 0.1165346   | 0.157579413 | 0.143152173 |
| 0.05962641  | 0.1485076   | 0.05002237  | 0.3064048   | 0.3214119   | 0.04586949  |
| 0.1282011   | 0.04523893  | 0.1204751   | 0.04303437  | 0.01976106  | 0.2098398   |
| 0.133467503 | 0.07194839  | 2.35684     | 0.2619857   | 0.3141089   | 0.1559455   |
| 0.4402768   | 0.0540081   | 0.03756966  | 0.07446574  | 0.1860740   | 0.1359328   |
| 0           | 0.2484326   | 0.05731775  | 0.2309362   | 0.1064630   | 0.1209046   |
| 0.0241262   | 0.2366198   | 0.1148146   | 0.1201181   | 0.08356065  | 0.2711119   |
| 0.02516604  | 0.1291659   | 0.04137741  | 0.2894324   | 0.05156635  | 0.1041271   |
| 0.1837945   | 0.1280222   | 0.03004212  | 0.1751234   | 0.06407876  | 0.03201503  |
| 0.3401271   | 0.03355706  | 0.2657957   | 0.0369188   | 0.05677351  | 0.06532378  |
| 0.4313020   | 0.1023901   | 0.2458890   | 0.1435307   | 0.1432274   | 0.2568325   |
| 0.118711531 | 0.1509526   | 0.01776436  | 0.2116079   | 0.02747693  | 0.09516623  |
| 0.165237671 | 0.241974937 | 0.07809835  | 0.007454487 | 0.04710539  | 0.2610294   |
| 2.5485790   | 0.6402549   | 0.2100880   | 0.1002028   | 0.2686044   | 0.04159012  |
| 0.0695849   | 0.06284243  | 0.2103301   | 0.1169503   | 0.02370559  | 0.3029868   |
| 0.02089557  | 0.04664655  | 0.2447291   | 0.02876306  | 0.2896829   | 0.1826106   |
| 0.1316236   | 0.3033295   | AC145285.6  | 0.1924170   | 0.1384396   | 0.3339004   |
| 0.102817284 | 0.060959431 | 0.2239408   | 0.2674070   | 0.0905684   | 0.05101002  |
| 0.1170202   | 0.2194490   | 0.147524686 | 0.1270356   | 0.193091262 | 0.035317195 |
| 0.1863206   | 0.3477813   | 0.6656559   | 0.06409982  | 0.7738526   | 0.122544076 |
| 0.21685     | 0.5248487   | 0.3351314   | 0.2612701   | 0.09960513  | 0.5095855   |
| 1.43013     | 0.4846349   | 0.266946555 | 0.2550380   | 0.760330896 | 0.4402813   |
| 0.3039917   | 0.3082113   | 0.261788894 | 0.4321389   | 1.310676    |             |



|                           |                     |                           |                   |                     |             |
|---------------------------|---------------------|---------------------------|-------------------|---------------------|-------------|
| 0.6701777                 | 0.5973631           | 0.7010277                 | 0.06317007        | 1.05617             | 0.3876881   |
| 0.2808997                 | 0.7130941           | 0.6884281                 | 0.2443643         | 0.1870238           | 0.4239927   |
| 0.1884713                 | 0.4076965           | 0.3090691                 | 0.217040376       | 0.2580448           | 0.3951874   |
| 0.5894644                 | 0.4365664           | 0.1652935                 | 0.3744650.5010933 | 0.2107750.1098123   |             |
| 0.2829740.9015401         | 0.298715266         | 0.2095659                 | 0.8591816         | 0.3387051           |             |
| 0.101227004               | 0.4585315           | 0.2379987                 | 0.5202686         | 0.161557909         | 0.3480694   |
| 0.6128654                 | 0.8205984           | 0.5596241                 | 0.5414751         | 0.4765031           | 0.5289496   |
| 0.3572675                 | 0.1529046           | 0.3676711                 | 0                 | 0.3012739           | 0.1504723   |
| 0.2175221                 |                     |                           |                   |                     |             |
| 0.3862184                 | 0.6695516           | 0.3350916                 | 0.449882415       | 0.3932274           | 0.5709075   |
| 0.7797734                 | 0.352592899         | 0.4013177                 | 0.1128865         | 0.2207752           | 1.396518    |
| 0.2077224                 | 0.3356060.9824906   | 0.3220719                 | 0.1751656         | 0.1762294           |             |
| 0.169514003               | 1.2072680.439197826 | 0.4863074                 | 0.6217714         | 0.2849850.3555805   |             |
| 0.6260594                 | 0.1118507           | 0.07566178                | 1.2080140.2804664 | 0.3517008           |             |
| 0.7398444                 | 0.2262455           | 0.3362835                 | 0.1934569         | 0.7685887           | 0.6448862   |
| 0.07389378                | 0.5537574           | 0.3143351                 | 0.40031747        | 0.5384380.2353233   |             |
| 0.1510565                 | 0.2254468           | 0.223039417               | 0.2919196         | 0.2850469           | 0.491387    |
| 0.5216434                 | 0.3328803           | 0.3717361                 | 1.0174150.2099095 | 0.1106304           |             |
| 0.08346681                | 0.20337             | 0.2425022                 | 1.0779250.5758384 | 0.5442820.4050877   |             |
| 0.3258710.5666335         | 0.6879271           | 0.154598213               | 0.1964897         | 0.6361021.50196004  |             |
| 0.3839822                 | 0.1941797           | 1.0995070.1797515         | 0.8864032         | 0.1467563           |             |
| 0.289584299               | 0.3648460.3743893   | 0.3371570.2758623         | 0.1565846         | 0.5624869           |             |
| 0.3476765                 | 0.5944708           | 0.1857420.230467604       | 0.6737255         | 0.3320064           |             |
| 0.6301750.1174015         | 0.1914263           | 0.3820297                 | 0.3822147         | 0.2100494           |             |
| 0.2569790.1588970.3606088 | 0.4093223           | 0.3511363                 | 0.2768313         | 0.3114442           |             |
| 0.4082731                 | 0.3886090.9693193   | 0.240614691               | 0.8716388         | 0.7617360.1642172   |             |
| 0.7927471                 | 0.4463380.3929473   | 0.097012784               | 0.8036346         | 2.1301330.1924836   |             |
| 0.2474016                 | 0.19628948          | 0.1914880.37988           | 0.4687699         | 0.8957513           | 0.6237189   |
| 0.1833851                 | 0.1928075           | 0.2059674                 | 1.9375290.1443436 | 0.6289262           |             |
| 0.1971179                 | 0.4103857           | 0.362706501               | 0.119716973       | 2.1141670.187066855 |             |
| 0.31568925                | 0.6290849           | 0.247891692               | 0.5943122         | 0.2847390.4966375   |             |
| 0.286434282               | 1.1884420.5333208   | 0.5887368                 | 0.491857157       | 0.09169094          |             |
| 0.7602231                 | 0.5472268           | 0.4725792                 | 0.8211687         | 0.7610341           | 0.1905071   |
| 0.5392951                 | 0.0652106           | 0.25318                   | 0.1805065         | 0.842326256         | 0.7271733   |
| 0.121036859               | 0.2691388           | 0.2732114                 | 0.2447306         | 1.0884220.8735172   |             |
| 0.4395672                 | 0.6320406           | 0.6821208                 | 0.3193951         | 0.655316957         | 0.3717517   |
| 0.4915640.2191224         | 0.5641448           | 0.4585924                 | 0.4242717         | 0.2655032           |             |
| 0.3405383                 | 0.1308303           | 0.4876064                 | 0.3562977         | 0.6523382           | 0.1197803   |
| 0.2486370.338046419       | 0.4860944           | 0.1646790.3831283         | 0.2162781         | 1.257671            |             |
| 0.1685234                 | 0.2730264           | 0.1048323                 | 0.9435896         | 0.3275727           | 0.639342656 |
| 0.47393702                | 0.4619235           | 1.4219820.3324870.5132068 | 0.2774830.3839881 |                     |             |
| 0.2666786                 | 0.1259988           | 0.4154881                 | 0.3879417         | 0.2730654           | 0.3591781   |
| 0.1493554                 | 0.3482917           | 0.2567093                 | 0.1953588         | 0.1655759           | 0.2311321   |
| 0.276291976               | 0.6525913           | 0.3255771                 | 0.07522909        | 0.3930988           | 0.2204779   |
| 0.6832427                 | 0.5664363           | 0.2092248                 | 0.7164792         | 0.4628131           | 0.3558301   |

|             |             |             |             |             |             |
|-------------|-------------|-------------|-------------|-------------|-------------|
| 0.27049095  | 0.2642569   | 0.2239816   | 0.3314749   | 0.4205121   | 0.2921372   |
| 0.257880105 | 0.1906090   | 0.24852     | 0.6529761   | 0.1558936   | 0.2710605   |
| 0.3632911   | 0.266597881 | 0.2273477   | 1.1446870   | 0.8186902   | 0.08579473  |
| 0.240237001 | 1.2842320   | 0.1011927   | 0.3323395   | 0.266088043 | 0.392367257 |
| 0.1978371   | 0.3993734   | 0.3801042   | 0.3669462   | 0.6331908   | 0.1549101   |
| 0.714004    | 0.2291709   | 0.2948315   | 0.3229675   | 0.4983022   | 0.2786223   |
| 0.34672732  | 0.2356205   | 1.4306290   | 0.5224393   | 0.07174536  | 0.3250975   |
| 0.2317246   | 0.1756404   | 0.2326133   | 0.3772278   | 0.9775231   | 1.2830450   |
| 0.2508934   | 0.3471744   | 0.4645754   | 0.3639608   | 0.2066356   | 0.3157661   |
| 0.1629577   | 1.0222860   | 0.4856681   | 0.4225645   | 0.4820924   | 0.8477753   |
| 0.6799246   | 0.5816244   | 0.2561891   | 3.0468860   | 0.4643987   | 0.7267585   |
| 0.5880406   | 0.8046622   | 0.4565611   | 0.2697730   | 0.1683161   | 0.2986198   |
| 0.2552611   | 0.6988601   | 2.1571280   | 0.6649701   | 0.2556468   | 0.4412220   |
| 0.2044337   | 1.9522031   | 1.8742930   | 0.3785529   | 0.4274011   | 0.020559577 |
| 0.1699321   | 0.5044522   | 1.5672030   | 0.2040601   | 0.216015291 | 0.215385008 |
| 0.08791773  | 0.285319418 | 0.26514     | 0.5876978   | 0.7172535   | 0.5447565   |
| 0.2081223   | 0.3807046   | 0.5454632   | 0.4681929   | 0.4700033   | 0.1886498   |
| 0.6106306   | 0.240412706 | 1.0496540   | 0.7118226   | 0.4861376   | 0.2310505   |
| 0.3163138   | 0.4856920   | 0.09881971  | 0.6805090   | 0.4055256   | 1.547274    |
| AC008870.4  | 0.07084444  | 0           | 0.02731912  | 0.050473939 | 0           |
| 0.03664486  | 0           | 0           | 0.02051654  | 0.1795491   | 0.160936022 |
| 0.1439145   | 0           | 0           | 0.09154006  | 0           | 0.1228311   |
| 0.5945838   | 0.1113450   | 0.09077126  | 0           | 0.09154006  | 0           |
| 0.2827672   | 0.2565197   | 0.2444853   | 0.1250801   | 0.9082645   | 0.03965195  |
| 0           | 0.05961927  | 0.348369792 | 0           | 0.2487205   | 0.07963355  |
| 0.128514548 | 0.9642769   | 0           | 0.4264767   | 0.0814586   | 0.07821384  |
| 0.2039139   | 0.09193082  | 0.3182403   | 0           | 0.03748771  | 0.07248289  |
| 0           | 0.02001419  | 0.1685831   | 0.156686902 | 0.1490312   | 0.1251620   |
| 0.3528944   | 0.1217696   | 0.1014301   | 0.03829756  | 0.5922012   | 0.1379618   |
| 0.07701123  | 0.1225716   | 0.1500252   | 0           | 0           | 0.5872887   |
| 0.1039209   | 0           | 0.03630601  | 0           | 0.1451162   | 0           |
| 0.2190647   | 0.08131384  | 0.1079034   | 0.04040067  | 0.4984032   | 0.08996912  |
| 0.2163885   | 0.05846196  | 0.03753113  | 0.04010957  | 0           | 0.0448176   |
| 0.1154191   | 0.1483105   | 0           | 0.1575906   | 0.05874983  | 0.102721566 |
| 0.02681096  | 0.0212321   | 0.2014726   | 0.230788079 | 0.04690726  | 0           |
| 0.2463195   | 0.1748886   | 0.02427925  | 0           | 0.1291911   | 0.2062279   |
| 0.02687199  | 0.2162815   | 0.104019956 | 2.417424    | 0.06341359  | 0           |
| 0.3815415   | 0.1399017   | 0           | 0.1182070   | 0.09151423  | 0.03714306  |
| 0.07701623  | 0.1311271   | 0.2083745   | 0.1210654   | 0.05553298  | 0.07177593  |
| 0.3287414   | 0.1122938   | 0.1283434   | 0.07255026  | 0           | 0.03857749  |
| 0           | 0.1623043   | 0.1925373   | 0.1059357   | 0.1627557   | 0           |
| 0.2492278   | 0.1234695   | 0.06030659  | 0.1191067   | 0           | 0.1610194   |
| 0           | 0.1288081   | 0.1131447   | 0           | 0.03565578  | 0.0476186   |
| 2.2138460   | 0.1378948   | 0.03515697  | 0           | 0.04847668  | 0.03566225  |
| 0.0383761   | 0.042163149 | 0           | 0.2230487   | 0.05994519  | 0.1009823   |
| 0           | 0.03598386  | 0.1357564   | 0.4432016   | 0.2161320   | 0.129235968 |
| 0.1628239   | 0.3595913   | 0.1241351   | 0.09673093  | 0.1747019   | 0.1284325   |
| 0.1444195   | 0           | 0.05363674  | 0.174059449 | 0.3779862   | 0           |
| 0.1835178   | 0.09605574  | 0.09397293  |             |             |             |

|             |             |             |             |             |             |
|-------------|-------------|-------------|-------------|-------------|-------------|
| 0.1512434   | 0.1876327   | 0.1288939   | 0.06007302  | 0.1063691   | 0.03052175  |
| 0.4110137   | 0           | 0.03774972  | 0.1132525   | 0           | 0           |
| 0.1146148   | 0.1507835   | 0.04030785  | 0.08980772  | 0.1825928   | 0.1102294   |
| 0.029765286 | 0.1360385   | 0.1472819   | 0.1181149   | 0.1518146   | 0           |
| 0.2220078   | 0.11135     | 0.1482244   | 0.06248761  | 0.2132181   | 0.1352157   |
| 0.1986115   | 0.3658272   | 0.1012280   | 0.3562449   | 0.15279     | 0.07195074  |
| 0.048975125 | 0.4670387   | 0.065594871 | 0           | 0.03356777  | 0.08112819  |
| 0.0931873   | 0.2285661   | 0.082713643 | 0.6216738   | 0.1335776   | 0.2726568   |
| 0.313000009 | 0.0562649   | 0.1166251   | 0.03198079  | 0.0814012   | 0.1919615   |
| 0.3113321   | 0           | 0.05091247  | 0           | 0.1553604   | 0.1399141   |
| 0.3454606   | 0.231070367 | 0.21234     | 0.2682439   | 0.0480562   | 0.04309     |
| 0.1166419   | 0.1292810   | 0.1493276   | 0.151745779 | 0.2851505   | 0.1664229   |
| 0.1728791   | 0.05651914  | 0           | 0.02975412  | 0.07666936  | 0.07268406  |
| 0.1595803   | 0.07604774  | 0.03480856  | 0           | 0.03390504  | 0.228896635 |
| 0.3368434   | 0.1516784   | 0.02211935  | 0.2004552   | 0           | 0.06701557  |
| 0.1139058   | 0.1531509   | 0.133557073 | 0           | 0.1106158   | 0           |
| 0.2383196   | 0           | 0.09750168  | 0.03538242  | 0           | 0.1019834   |
| 0.09531015  | 0.2443997   | 0.06576136  | 0.09001494  | 0.1106578   | 0.1270042   |
| 0.03151801  | 0.092477893 | 0.2288307   | 0.1737269   | 0.02308165  | 0           |
| 0.03422551  | 0.5273717   | 0           | 0.1758631   | 0.08414784  | 0.3304761   |
| 0.03603503  | 0.3298639   | 0.03874382  | 0.1517891   | 0.1365836   | 0.090425491 |
| 0.1488641   | 0.07320044  | 0.1576485   | 0.08503289  | 0.02464186  | 0.09907939  |
| 0.124643165 | 0.08811083  | 0.5268160   | 0.06279726  | 0.1169928   | 0.128189704 |
| 0.1033510   | 0           | 0.130625039 | 0.240770817 | 0.05202858  | 0.2051749   |
| 0.1441098   | 0.03700466  | 0           | 0.2610189   | 0.03125058  | 0.05789419  |
| 0.1310470   | 0.1189376   | 0.085105797 | 0           | 2.4900050   | 0.08273232  |
| 0.0957560   | 0.4423834   | 0.1989772   | 0.02595273  | 0.2057606   | 0.2570759   |
| 0.08667779  | 0.09237439  | 0.1893679   | 0.0633512   | 0.3403270   | 0.1014393   |
| 0.1870840   | 0.04444301  | 0.2120490   | 0.1153640   | 0.04148815  | 0.08658423  |
| 0.03756904  | 0.02858308  | 0.08645918  | 0.04071027  | 0.2301757   | 0.213833    |
| 0.2358304   | 0.2490333   | 0.4584255   | 0.1180398   | 0.1011001   | 0.0963923   |
| 0.4172555   | 0.1707990   | 0.05829283  | 0           | 0.1312727   | 0.03136199  |
| 0.2503163   | 0.2379588   | 0.2064834   | 0.1542758   | 0.100928832 | 0.06951764  |
| 0.06544766  | 0.3095502   | 0           | 0.07513123  | 0.147283153 | 0.06219674  |
| 0.164783407 | 0.1735462   | 0.07592268  | 0           | 0.1645698   | 0.06966077  |
| 0.08731722  | 0           | 0.09613703  | 0.1157624   | 0.2141172   | 0           |
| 0.3464265   | 0           | 0.07513612  | 0.07947687  | 0.1212787   | 0.2435913   |
| 0.2357289   |             |             |             |             |             |
| AC139887.2  | 0.3948397   | 0.4831259   | 0.4132733   | 0.522429308 | 0.218408933 |
| 0.4668206   | 0.5533303   | 0.5309896   | 0.4153673   | 0.3593715   | 0.6969072   |
| 0.496525945 | 0.7638888   | 0.363878514 | 0.690198888 | 0.4551546   | 0.531911    |
| 0.2168136   | 0.1252694   | 0.9201520   | 0.259443314 | 2.2330310   | 0.4339518   |
| 0.7275999   | 0.7177972   | 3.1967611   | 2.508570    | 0.6787658   | 0.260844919 |
| 0.703327803 | 0.2426869   | 0.5693330   | 0.2536139   | 0.22510853  | 2.0089410   |
|             |             |             |             |             | 0.3578475   |

1.2369571.4268440.2802290.25925 1.41343 2.0429580.4940625 1.292238  
0.7080975 0.4924813 0.4809182 0.3912847 0.3551723 0.6374043  
0.6375653 0.187128929 0.2521467 1.8809461.5874870.5138444 0.827766  
0.6403352 0.7435271 0.3569927 0.2605913 0.3253011 0.388208  
1.219059509 0.3780477 2.6036471.3928040.678262242 0.9972744 0.1661134  
0.9127673 1.010337001 1.9011480.5503011 0.8304791 1.4957481.706343  
0.2148977 0.7752890.4189217 0.1942325 0.9181271 0.054775383  
0.5174085 1.2038321.1336010.3773906 2.5632171.3798940.439599389  
0.3522194 0.3803578 1.1496090.436409268 0.8776572 0.1733384  
0.7648572 0.5291296 0.3479563 1.7685071.8172071.0399120.5134854  
0.5904044 0.745377288 11.300030.40391437 0.3099077 1.2488720.5569422  
1.0616621.4587870.3460981 0.3992348 0.6898454 0.6394633 0.4384653  
0.8193248 0.3979335 1.5144040.8870103 1.2427611.0133430.332142  
0.9370270.6757307 0.72365961 0.2584502 0.4598890.2952075 0.4924214  
0.750686951 1.0045660.6717525 2.04066 0.3082029 0.5939742 0.7692126  
0.9154148 0.4273159 0.2702543 0.7204378 0.4400263 0.4739185  
4.7290430.1784096 0.5458371 0.4552028 0.2991242 0.2697424  
0.5347069 0.654613005 1.3653230.5623661 0.656257105 0.9246135  
1.3281890.2865001 0.4863958 1.8606030.3154841 0.797447464 0.5833746  
0.3817376 0.8895166 2.0120490.3755591 1.0097860.7160456 0.343249  
0.4804319 0.554337903 0.9028471 0.2433133 1.4715880.8540118  
0.5518001 0.3371721.5312610.7696809 0.9446340.4516802 0.3159146  
0.7332716 0.2058662 0.9016791 0.42831 0.4714758 0.5012392.073961  
0.496353733 0.8517156 1.1525030.4172055 0.6912058 0.5669768 1.21772  
0.497675584 1.1508211.2605930.4325931.26917 0.383605727 0.3660870.4242252  
0.7979025 0.7867659 1.1940491.0845920.1749433 0.3450165 1.262162  
1.0477580.6145508 0.7907244 0.5585433 0.398718076 0.721380274  
2.6855960.48309061 0.252387406 0.3073529 0.242225596 0.7919018  
0.8717893 0.4852858 0.971373267 1.5610620.4147775 0.8466384  
1.851256654 0.7167612 0.9285583 0.7129584 0.9802643 1.413751  
1.2256270.4786782 2.3713580.08496009 0.7731031 0.6776730.480125966  
0.2292104 0.394234341 1.0237710.9788775 0.9565472 0.4116942  
0.9356233 0.9286917 0.9778570.05332236 0.8322523 0.616174575  
0.4994751.0434720.7876334 1.1925 0.4257048 0.3908842 0.6256951.14294  
0.5844108 2.6205360.7265818 0.5681420.3043103 0.5398974 0.956787935  
2.0734870.5363830.2536062 0.8541441.3725650.5988052 1.6273930.604373  
1.98008 0.8688030.917155502 0.628498521 0.8256682 0.9019426 0.7383803  
2.1956530.8736750.8409907 0.5634229 0.3283169 1.4074360.4603047  
1.4508550.9959911 1.3037450.8377371 0.9245306 0.1762093 0.5359336  
0.6022641 0.785386852 1.0280880.7607584 0.3675479 0.1536455  
0.1657219 0.3951254 4.1034540.8382142 0.6534290.8039725 2.236537  
0.772593491 0.3442890.5252690.9716950.3021326 0.2990531 1.034941278  
0.7704070.3788297 1.7467950.7278005 0.5395395 1.8538230.272909178  
0.5027632 1.55195 1.3374620.4843725 0.540936135 0.3085767 0.336191

|                     |                                   |                           |                           |                   |                    |
|---------------------|-----------------------------------|---------------------------|---------------------------|-------------------|--------------------|
| 0.2734679           | 0.936021711                       | 1.916994314               | 0.2968767                 | 0.9529236         | 0.2476107          |
| 0.6597483           | 0.42721                           | 0.07568466                | 0.9648820.5225097         | 0.6107562         | 0.3471439          |
| 0.9912146           | 0.5800188                         | 0.485616378               | 0.5611975                 | 7.9809060.7081099 |                    |
| 0.4807232           | 0.4955601                         | 0.8679743                 | 0.8845326                 | 0.5165828         | 1.003426           |
| 1.0745770.9201605   | 0.1593532                         | 1.8658150.3278575         | 0.5419303                 | 0.2422951         |                    |
| 2.0534440.2476957   | 1.6038982.3192560.8588442         | 1.0340630.5136065         |                           |                   |                    |
| 0.2491438           | 0.7478028                         | 0.3299848                 | 0.6023323                 | 0.1458591         | 0.4810672          |
| 0.8831811           | 0.8801529                         | 0.7931119                 | 1.0037330.6931186         | 0.5835883         |                    |
| 0.7482796           | 0.8859063                         | 1.3734840.2552671         | 0.2141172                 | 1.89439           | 0.3620667          |
| 0.5119504           | 1.58016                           | 1.1209751.2330010.7492808 | 0.924123613               | 0.8117895         |                    |
| 0.8597952           | 1.9443030.1007488                 | 0.4287012                 | 0.621506852               | 0.742806784       |                    |
| 0.2577245           | 0.508396045                       | 0.2763516                 | 0.8160603                 | 2.3361970.9172024 |                    |
| 0.6378273           | 0.4822259                         | 0.7647326                 | 0.2378955                 | 0.3061736         | 0.2880278          |
| 0.8402135           | 0.503394768                       | 0.1912251                 | 1.5649930.3064683         | 0.3078672         |                    |
| 0.8574582           | 1.4343180.9945781.1913770.3505346 | 1.199099                  |                           |                   |                    |
| AC244093.5          | 0.2062185                         | 0.04239127                | 0.07157001                | 0.044076824       | 0.04355458         |
| 0.1280018           | 0.1011485                         | 0.03235487                | 0                         | 0.0358325         | 0.1175947          |
| 0.1047288           | 0                                 | 0.075700783               | 0.3328081                 | 0.06482202        | 0.03963341         |
| 0.3397373           | 0.175111729                       | 0.07150892                | 0.2596128                 | 0.08979236        | 0.3920143          |
| 0.2401864           | 0.2839910.1929284                 | 0.2770114                 | 0                         | 0.1041261         | 0.282487284        |
| 0.08144902          | 0.2086221                         | 0.157117089               | 0.1122751                 | 0.1239429         | 0.05320352         |
| 0                   | 0.1354021                         | 0.0984283                 | 0.5342089                 | 0.2006985         | 0.2501156          |
| 0.09820944          | 0.1054939                         | 0.1009788                 | 0.05771137                | 0.08738786        | 0.2576293          |
| 0.21892521          | 0.09760716                        | 0.3005718                 | 0.3081682                 | 0.04253455        | 0.1992932          |
| 0.1003311           | 0.1193412                         | 0.2409528                 | 0.2017523                 | 0.07135784        | 0.06550541         |
| 0.075327346         | 0                                 | 0.3496740.1209998         | 0.03099649                | 0.1902273         | 0                  |
| 0.173145976         | 0.01913002                        | 0                         | 0.5025472                 | 0.0705605         | 0.1450784          |
| 0.3464325           | 0.2042097                         | 0                         | 0.08756511                | 0.080103276       | 0.1565495          |
| 0.2072216           | 0                                 | 0                         | 0.05130382                | 0.089702538       | 0.04682582         |
| 0.1172918           | 0.403075559                       | 0.2457732                 | 0                         | 0.2581209         | 0                  |
| 0.1541477           | 0.07521155                        | 0.2401205                 | 0.1173311                 | 0.08094419        | 0.090836369        |
| 4.0177810.083064737 | 0.1359623                         | 0.2221231                 | 0.1954727                 | 0.2117140.1238704 |                    |
| 0.1598313           | 0.06487102                        | 0                         | 0.1145080.1819649         | 0.1409620         | 0.125358           |
| 0.1594869           | 0.4510833                         | 0.07471805                | 0.1267103                 | 0                 | 0.1010644          |
| 0.02024767          | 0.07205782                        | 0.1618913                 | 0                         | 0                 | 0.08161517         |
| 0.02600276          | 0.06204466                        | 0.2343527                 | 0.04318382                | 0.1874714         | 0.2515820.05266328 |
| 0.08945363          | 0.1245469                         | 0.04158338                | 2.9706210                 | 0.03070115        | 0.04341434         |
| 0                   | 0                                 | 0.073638703               | 0.3275741                 | 0.1623161         | 0.314086079        |
| 0.1783779           | 0.1256929                         | 0.2667386                 | 0.1055536                 | 0.2516523         | 0.1763675          |
| 0.0710937           | 0.06978141                        | 0.1084021                 | 0.4012380.0610240.1401936 | 0.112856479       |                    |
| 0                   | 0.1405163                         | 0.113999242               | 0.2475599                 | 0.03558202        | 0.3439517          |
| 0.3077352           | 0.02641494                        | 0.2457779                 | 0.1125578                 | 0.2622966         | 0.1957236          |
| 0.1066136           | 0.1994008                         | 0                         | 0.09889587                | 0.09889873        | 0.03096259         |
| 0.2865781           | 0.1994008                         | 0                         | 0.09889587                | 0.09889873        | 0.03977793         |
|                     | 0.028652585                       | 0.6005307                 | 0.05266923                | 0.0351992         | 0                  |
|                     |                                   |                           |                           |                   | 0.1568508          |

0.1594508 0.3128411 0.025992806 0 0.03215382 0.04125797 0.08838231  
0 0.08922733 0.1550963 0.09723743 0 0.1091357 0.3517009  
0.05903915 0.1261376 0.3194619 0.04419914 0.3802261 0.1334252  
0.2827424 0.048590295 0.064151957 0.1812648 0.11456263 0.123030072  
0.02931336 0 0.02895184 0.2034416 0.2883074 0.036115219 0.08352035  
0.1399774 0.14286 0.078094312 0.09826766 0 0.02792751 0.07108434  
0.2095402 0.2416654 0.1750042 0.1778391 0 0.0452233 0.1629084  
0.210640222 0 0.028826327 0.2678402 0.2342465 0.08393102 0.03762874  
0.1440265 0.1018586 0.1505278 0 0.3912049 0.1060107 0.1743072  
0.1453303 0.05032274 0.07403378 0 0 0.03347611 0.2538881  
0.1402143 0.1741936 0.06640937 0.1215876 0 0 0.074957272  
0.1602955 0.2353212 0 0.1352115 0.1750494 0.03283838 0.05852195  
0.06741095 0.2652513 0.0334351 0.145787404 0.072561587 0.2897888  
0.05347284 0.1619706 0.2973068 0.09912868 0.05676282 0 0  
0.3859178 0 0.6950475 0.2704990.1280546 0.2871335 0.3301467  
0.1288439 0.3549043 0.1376169 0.080757157 0.6565794 0 0.1814064  
0 0 0 0.5861318 0 0.1535740.25719 0.3504323 0.08919768  
0.03146792 0.1920377 0 0.05302049 0 0.217153417 0.09285493  
0.06392295 0.1376680.03712787 0.1506311 0.04326099 0.027211443  
0.1282393 0.5213864 0.02741914 0.1225980.11194282 0.04512611 0 0  
0.152092664 0.090109412 0.01514481 0.1791709 0.0301754 0.09438388  
0.09694396 0 0.09768732 0.1091594 0 0.1038399 0.05721899  
0.05193165 0.148638815 0 3.9585580.07224675 0.3515037 0.0836198  
0.1931576 0.7819139 0 0.08984115 0.1496626 0.05046145 0  
0.1446963 0.05532201 0.1857460.1240159 0.1400338 0.03881026  
0.1234491 0.2854375 0.1086897 0.1764244 0 0.03036223 0.1640375  
0.0748813 0.07550126 0 0 0.1867316 0.3603969 0.2174706  
0.1779219 0.05153967 0.08828658 0.04208772 0.2834006 0.4176249  
0.1272619 0 0.08597628 0.1643228 0.04492044 0.1561364 0  
0.1803135 0.1347227 0.088137016 0.06070691 0 0.3003528 0  
0.04373935 0.077169808 0.054313866 0.03140794 0.107923952 0 0.06630017  
2.0498660.2694601 0.1419411 0.1208923 0.07625056 0 0.06996045  
0.07581791 0.1869798 0.049077484 0.07626728 0.3496531 0.06722669  
0.04502237 0.1749688 0.1619424 0.1694524 0.3950483 0 0.1829799  
AC004637.1 0.1535943 1.6418260.03553753 2.363688298 0.064880058 0.2383437  
1.1551631.15672 2.6059561.7080650.4087351 0.157012789 0.7488329  
0.704605697 0.676595383 0.04957597 0.1448409 0.05903898 0 0.08930854  
0 0.2130432 0.03222718 0 0 0.2385254 0.03254158 0 0  
0.042617297 0.1163318 0.032369274 0 0 0 0.066870225 0.04181201  
0.06154289 0 0 0.1017429 0.04033973 0.07331071 0.1768382 0  
0.04139765 0.1156902 0.04876513 0 0 0.0429842 0.05207011 0 0  
0 0 0 0.1267212 0.03298582 0.2989116 0.1185159 0.1794649 0  
0.05314827 0.0487893 0 0.1029435 0.1389023 0.04506113 0.092346389  
0.04722795 0 0.1510172 0.154753706 0.02849659 0.05288774 0

|                   |             |             |                    |             |             |             |             |            |            |
|-------------------|-------------|-------------|--------------------|-------------|-------------|-------------|-------------|------------|------------|
| 0.0525544         | 0.08644504  | 0.05851726  | 0.0469141          | 0           | 0.09764323  | 0.02608786  |             |            |            |
| 0                 | 0           | 0           | 0.0771707          | 0           | 0           | 0           | 0.033405821 | 0          | 0          |
| 0.1830551         | 0.05149152  | 0.06408395  | 0                  | 0.03158317  | 0.1530817   | 0.05601856  |             |            |            |
| 0.08942245        | 0.1048677   | 0           | 0.067656133        | 4.4633840   | 0.06751102  | 0           |             |            |            |
| 0.2183860         | 0.03075345  | 0           | 0                  | 0           | 0.04264352  | 0.03872282  | 0.1049904   | 0          |            |
| 0                 | 0           | 0.02921503  | 0                  | 0.09437554  | 0           | 0.4516448   | 0.063909604 | 0          |            |
| 0.03577975        | 0.1722554   | 0.1270305   | 0.158256184        | 0.04052537  | 0.05353761  | 0           |             |            |            |
| 0                 | 0.1848468   | 0           | 0                  | 0           | 0           | 0.04638211  | 0.03097185  | 3.9334370  | 0          |
| 0.06467116        | 0           | 0           | 0.04992077         | 0           | 0           | 0           | 0.04378695  | 0          | 0.04680888 |
| 0.3973410.1572354 | 0           | 0.042028502 | 0.05295153         | 0           | 0           | 0           | 0           | 0.2506033  |            |
| 0.08539326        | 0.2588336   | 0.1395445   | 0.113210866        | 0.06146198  | 0           | 0           | 0           | 0          | 0          |
| 0.2360904         | 0.0813594   | 0.1117794   | 0.03907239         | 0           | 0.1191108   | 0.6930763   |             |            |            |
| 0                 | 0           | 0.1104916   | 0                  | 0.0496323   | 0.2134472   | 0           | 0.2484907   | 0.03922874 |            |
| 0.05243366        | 0.03894152  | 0.09500887  | 0                  | 0.038719573 | 0           | 0           | 0           | 0.7899398  |            |
| 1.163948912       | 0.07974924  | 0.05775888  | 0.1448475          | 0.06427159  | 0.1219286   |             |             |            |            |
| 0.1540891         | 0           | 0.02348725  | 0                  | 0           | 0.3604332   | 0.1325025   | 0           | 0          | 0          |
| 0                 | 0           | 0.2183298   | 0                  | 0.04312743  | 0.6667145   | 0.06607237  | 0.053798189 |            |            |
| 0.1244141         | 0.03475234  | 0           | 0                  | 0           | 0           | 0.1248047   | 0.02647228  | 0          |            |
| 0.04499891        | 0           | 0           | 0                  | 0           | 0.134475115 | 0           | 0.042940462 | 0.2455273  |            |
| 0.1453916         | 0           | 0.1121055   | 0                  | 0.1137985   | 0.1681726   | 0.2613570   |             |            |            |
| 0.118437266       | 0.07418646  | 0           | 0.04997472         | 0.07352179  | 0           | 0           | 0.0498669   |            |            |
| 0.0472748         | 0.08951443  | 0           | 0.8903265          | 0.04528002  | 0           | 0           | 0           | 0.02984756 |            |
| 0                 | 0           | 0.1150940   | 0                  | 0.04358793  | 0           | 0.1481720   | 0.086867516 | 0          |            |
| 0.03597309        | 0           | 0.7238272   | 0.2657256          | 0           | 0.3804993   | 0           | 0           | 0.4422103  |            |
| 0                 | 0           | 0           | 0.1271690.08554435 | 0.07025648  | 0           | 0.1321687   | 0.04099957  | 0          |            |
| 0                 | 0           | 0.2402024   | 0                  | 0           | 0.1335647   | 0.1870966   | 0           | 0.1525120  |            |
| 0.1535333         | 0           | 0.3281281   | 0.1430323          | 0           | 0.07898073  | 0           | 0           | 0.0829915  |            |
| 0                 | 0.03417898  | 0           | 0                  | 0.06444271  | 0           | 0.03820573  | 0           | 0.04084427 |            |
| 0.03043755        | 0.100051798 | 0           | 0.06462055         | 0.05584958  | 0           | 0.044743125 |             |            |            |
| 0.04512022        | 0.0296553   | 0           | 0                  | 0           | 0           | 0.08130337  | 0.07531049  | 0          | 0          |
| 0                 | 0.036902721 | 0           | 6.8103570.05381034 | 0.03272558  | 0.08304151  | 0.04110468  |             |            |            |
| 0.04313925        | 0           | 0.06691488  | 0.05573533         | 0.03758436  | 0           | 0           | 0           | 0          | 0          |
| 0.06953269        | 0           | 0           | 0.05396902         | 0.03754378  | 0.05413801  | 0.04522839  |             |            |            |
| 0.09774186        | 0           | 0           | 0                  | 0           | 0           | 0.05399167  | 0.09938892  | 0          | 0          |
| 0                 | 0.1777443   | 0           | 0.05830474         | 0.2134543   | 0.1223898   | 0.1338294   |             |            |            |
| 0.09303399        | 0.2063626   | 0           | 0.04013731         | 0           | 0           | 0           | 0           | 0.1954659  | 0          |
| 0                 | 0           | 0.053588795 | 0.05643852         | 0           | 0.7633839   | 0           | 0           | 0.1800844  |            |
| 0.03786162        | 0.05979658  | 0           | 0.1129404          | 0.07958002  | 0           | 0           | 0           | 0          | 0          |
| 0.1954786         | 0           | 0.0315526   | 0                  | 0.1494025   | 0.03407147  |             |             |            |            |
| AC008635.2        | 0.02634606  | 0           | 0.06095761         | 0           | 0.055644463 | 0.04088315  | 0           |            |            |
| 0.04133593        | 0           | 0.02288944  | 0.2003155          | 0.089774809 | 0           | 0           | 0           | 0.1275567  |            |
| 0.1656306         | 0           | 0           | 0.05106372         | 0.167789441 | 0.04567919  | 0.02763968  |             |            |            |
| 0.1433962         | 0.0715471   | 0.1022858   | 0.02790933         | 0.05477367  | 0.04423803  |             |             |            |            |
| 0.073101556       | 0           | 0.13880774  | 0                  | 0.2428012   | 0.2221096   | 0.114702664 |             |            |            |

0.07172024 0.05278234 0 0 0 0 0.06287502 0.3791637 0.05128169  
0.1420190.0661479 0.1254704 0.05391076 0 0.0737309 0.111645  
0.04702029 0.069923621 0.04156699 0.2094570.4724515 0.1086826  
0.2546130.04272699 0.3557584 0.07695913 0.04295911 0 0.1673768  
0.096236716 0 0.4169541 0.07729347 0 0.04050511 0 0.1295201  
0.176966278 0.1466408 0 0.2006388 0.13522 0.1112095 0 0.2011797  
0 0.08374384 0 0 0.1000023 0.02575366 0.1985566 0 0.02511675  
0.09831711 0.028650544 0.1794712 0.0710633 0.1498497 0 0.3139949  
0.08832353 0.1099234 0.1170696 0.05417469 0.06564536 0.1441332  
0.1533866 0.1498998 0.0344709 0.203088785 1.8270130 0 0.28378  
0.06243302 0 0.1055029 0 0.04143896 0 0.1828664 0.09963203  
0.04502256 0.06195584 0.1201161 0.1630058 0.07516891 0.1193229 0  
0 0.08607861 0.328872911 0.02586802 0.06137309 0 0 0 0.03475664  
0.0918332 0 0.06644122 0 0.3592853 0 0.2395098 0.07573852  
0.03809473 0.07955935 0.05312609 2.4698960 0 0 0.08112512 0 0  
0.04703967 0.05978601 0.1658975 0.066878353 0.1877696 0 0  
0.03786444 0.08990211 0.2411295 0 0.04541395 0.04457567 0.04616412  
0.1618780.1169446 0.1791085 0.2197129 0 0.05984027 0.14564316  
0.1581388 0 0.02924903 0 0.07863126 0 0.5582239 0 0 0  
0.1021555 0.06793346 0 0.1684632 0.06317552 0 0.04256721  
0.6407214 0.036605972 0.2557420.06728916 0.1798792 0.1001947  
0.1222267 0.2459566 0.099623671 0.03794311 0 0.05271035 0.05645774  
0 0 0.04953698 0.2070477 0.1378065 0.1045722 0.2378785  
0.07542725 0.0604316 0.1360460 0.1324825 0.0852307 0 0.186233977  
0.163918524 0.1157901 0.073181467 0.235771153 0.03745016 0.135767016  
0.07397659 0.05198259 0.08500057 0.092280167 0.2134079 0.2980539  
0.1825151 0.199543473 0 0 0.03567963 0.1135199 0.2141635  
0.3473403 0.2235819 0.1704028 0.05952498 0.05777639 0 0.26910975  
0.2569440.036827941 0.0263221 0.1246952 0.1608429 0 0.09200266  
0.2277319 0.09615564 0.03735886 0.1665985 0.101577868 0.1272522  
0.04641778 0.08572177 0.1261121 0.09418688 0 0.1283052 0.4865435  
0 0.1780371 0 0.03883446 0 0.03782644 0.063842611 0.1023952  
0.2254813 0.06768849 0.04935527 0 0.2097683 0.03738324 0.02870763  
0.2965198 0.2135801 0.111753049 0 0.03085237 0 0.04138609  
0.03798332 0.08442988 0.1450381 0.05921204 0 0.3034098 0  
0.1402072 0.02658339 0.1090666 0.2934689 0.2008518 0 0.2550480  
0.103173734 0.2917679 0.1162919 0.02575124 0 0 0.03818398  
0.4279030.05729483 0.1308021 0.09388024 0.2370205 0.028489295  
0.1206084 0 0.1296746 0.06773792 0.07619034 0.151325933 0.09490369  
0 0.1758818 0.04743383 0.08247571 0 0.069529595 0.06553439  
0.3134649 0 0 0.114412733 0 0.0554219 0 0 0.422113961  
0.01934871 0.1271695 0.07710298 0.04019432 0.04128456 0.1414037 0  
0 0.1291803 0.04422126 0.04873456 0.1658671 0.094948994 0  
4.3450680.0923010.08420141 0.03561033 0.1057604 0.4069827 0



0.1147793 0.2868089 0.03223427 0.06870551 0.05281746 0.2120349  
0.1423833 0.06790297 0.0894522 0 0.1182871 0.2145113 0.0462866  
0.06439895 0 0.03879018 0 0.03188895 0.09645891 0.09083752 0  
0.1192823 0.1973296 0.2778361 0.1420684 0.06584606 0.02819829 0  
0.05172385 0.1143320.06503489 0 0.07322772 0 0.05738946 0.07979072  
0.1327403 0.03839415 0 0.112602096 0.2326738 0 0.2686073 0  
0.02794026 0.065727073 0 0 0.091920993 0.04840456 0.2964632 0  
0.04590092 0.1036235 0.07722478 0.03247206 0 0.03575203 0.06457563  
0.1023779 0.094050624 0 0.2436599 0.04294374 0 0.1117683  
0.05911269 0.1082445 0.4270587 0.04271174 0.2337715  
AC139530.1 1.3405981.1700591.2736350.3521687 0.427086029 0.6275781.763268  
1.10455 0.8206499 0.3773922 1.2385211.148409167 1.1486592.362050713  
0.989738922 1.2449411.3889684.2030260.7152139 3.03381 1.542214401  
4.0254063.0799861.0679931.8304772.0838293.8002712.3122133.2067541.340343106  
2.31624 3.353993802 3.6470831.4691591.5027062.070507827 2.5790633.330974  
3.99971 4.7535244.1796930.7769631 2.0911912.0802410.5102232.523226  
2.4068871.2721362.6435910.8068086 1.08989 2.6405372.1386271.391398715  
4.0293272.4809232.6972590.7492062 1.4154043.7166652.1382011.312626  
0.7937766 3.0839442.2362633.446997649 2.3090173.7336061.3183291.294577734  
1.5774660.7146152 2.6325281.144462495 2.2371192.3596441.9734251.60162  
4.38373 2.2826761.9101183.8009151.2259982.2515530.421828632 0.9594299  
2.1596861.45812413.725954.4410282.06819 1.376414432 2.4318641.393876  
5.0158725.910398657 2.2761061.2051671.0311785.1804712.0790262.416592  
3.7831372.7251911.7300431.1562830.874225385 4.5011492.815601878 4.542805  
3.53603 1.11811 2.42971 2.0918883.1200240.9188256 5.1171383.004632  
1.9825613.8267583.0468980.8308691.8419163.0912664.7826920.7593006  
7.9906342.2511932.851396342 3.4487811.1078511.6462633.1176992.064214572  
1.9365274.3465393.6530792.7103111.4759224.0002362.94847 2.7914940.9832088  
4.0067871.5039821.72164 0.9418618 4.2202293.38958 1.2929 2.652057  
2.7936152.6167371.056382024 2.5832883.7845522.157799433 2.5300751.597973  
5.0441841.8405914.5873721.0967312.151808284 0.8649554 2.6610123.740064  
2.8147011.2632622.2097121.20335 5.4795830.5613544 0.717632053 3.686226  
4.4195142.87685 0.4163387 2.0117194.1634861.9339832.5072051.257431  
1.2144484.4430682.19667 3.5425231.40075 1.3738522.7303726.1712762.02953  
1.07181248 3.75614313.179351.4828893.7976351.7604272.6743581.227197003  
2.8583045.9204990.7566882 1.4283781.309731238 0.9721582 3.196576  
1.7304032.8910511.4169712.40432 0.5789241 0.8417631.7016424.639054  
0.9038566 4.2884363.6168071.094104987 1.071730321 4.3448531.258595373  
0.94948474 3.0766721.003453532 2.3237331.1082785.9038351.901848974  
6.1878571.7030233.8912565.417146053 1.7844253.5877723.4282050.9874682  
1.9786022.4465112.3516251.3966940.7445289 2.0858532.36658 3.518980903  
4.6746394.606380007 4.0779952.3395021.4174035.6576721.7522850.9618089  
2.81541 3.57893 3.7413461.203143695 1.50121611.295041.9494442.9576063.24863  
3.4442992.5288092.31668 0.8220356 3.6312993.9674651.2695352.181891

4.7850352.023555666 1.90656 1.9442875.7629031.6695913.1151171.681584  
2.5823372.4318866.5867723.3149961.175413711 1.014577618 4.2887139.55468  
2.3176632.8289411.5960544.1332923.4113162.8662341.0242193.3650772.311681  
1.4509133.3252091.8144753.1060211.2283182.8598111.9591861.417573362  
6.5004690.9586878 1.3615722.8275191.6635063.6471213.9076720.765496  
2.8259072.1750114.8511861.976064736 1.9314011.1682051.0321491.617487  
1.8842952.014642898 0.3507164 0.8976588 2.7248791.7259483.493349  
3.2208321.353910376 1.2109112.6621133.2562621.7216231.08955413 6.129391  
2.3947193.5130153.4660895 2.661684063 1.1330491.2797231.6986451.393972  
1.6078221.4872782.2824011.0505691.2852692.7655621.8702541.8766062.555154106  
1.63931 1.5996454.3686811.7233823.7353561.8439511.8195291.6708592.479743  
1.4947333.4178761.5722342.26717 1.8082493.29198 0.5662132.4496121.888727  
1.8493961.0915232.5920962.0137291.6498812.2935853.3242611.0696755.991333  
0.7746692.4819861.2546061.4210661.6980750.4765507 0.5334631.234449  
1.7119511.4262393.8784582.0151281.2509122.07123 1.1438321.1093554.366292  
7.01852 3.06691 2.2800514.737375781 0.7863546 5.4901052.0943576.0197  
1.3502340.69131449 1.370923749 1.1064431.110537644 4.4444555.116716  
1.1166953.2229090.7879736 2.3379542.0215462.6387322.1495160.7801664  
1.8140782.575537725 4.7364412.7590553.7477262.2073941.3106072.520587  
1.5000651.7768492.4526092.408958  
AC020978.1 0 0 0 0 0 0 0.05656121 0 0 0 0 0 0.3162419  
0 0 0 0.05437174 0 0 0.1005764 0.07344055 0.1199612  
0.03629323 0.03765824 0.1409210 0.0366473 0.3955734 0 0.047994246  
0 0.255172733 0.1217816 0 0.1166594 0.075307123 0.04708736  
0.06930765 0.08925263 0 0.05728981 0 0.4953611 0 0.1346743  
0.1398622 0.1737155 0.05491774 0.03539468 0 0 0.05863971 0  
0.091815596 0.1091619 0.04583911 0.1550921 0 0.03714758 0  
0.5338751 0.1010538 0 0 0 0.063183452 0 0.3519616 0.1014928  
0 0.1595598 0 0.1700708 0.116185804 0.1925517 0.05956049  
0.05269113 0 0.5354341 0 0.1584995 0.1712881 0 0.1175173 0  
0.03282784 0.1690836 0.1303608 0 0.03298041 0.08606575 0.188102868  
0.0392768 0.03110403 0.09838263 0 0.1374339 0.05798811 0.1443386  
0.2562036 0 0.1723957 0.1892590.1007047 0.03936621 0 0 3.88413  
0 0.07602876 0.1863135 0 0.07103303 0.06926711 0.1340641  
0.05441284 0 0.1440713 0.2180421 0.05911841 0.08135323 0.1051484  
0.4280807 0.0987031 0.1253448 0 0 0.1130285 0 0.03396688  
0.2014701 0.03879771 0.2384295 0 0.09127678 0.06029236 0 0 0  
0.2358859 0 0.0628993 0.1326014 0 0 0 2.5312640.2020094 0  
0 0.07101607 0 0 0.061767043 0.1570081 0.2722967 0 0.09862294  
0 0.1581440 0.1180490 0.047331164 0 0.05853161 0.1212347  
0.03542657 0.1023720.04703692 0.05770031 0 0.03928766 0 0.1384330  
0.1536257 0 0.1032495 0 0.1832487 0.06294119 0 0.1558257  
0.08942587 0.1115029 0 0.05530158 0 0.06673027 0.05589432  
0.1201887 0 0.1679054 0 0 0.0438547 0 0.08074043 0.043604753

|             |             |             |            |             |             |             |            |
|-------------|-------------|-------------|------------|-------------|-------------|-------------|------------|
| 0           | 0.1078806   | 0.03460656  | 0.2965351  | 0.201661889 | 0           | 0.5854159   | 0          |
| 0.07238062  | 0           | 0.1041182   | 0.04952116 | 0.05290118  | 0           | 0           | 0.2319476  |
| 0.1119151   | 0           | 0.163027251 | 0          | 0.3801054   | 0           | 0           | 0.04917522 |
| 0.06825752  | 0.0744086   | 0.181757433 | 0.1401112  | 0.03913698  | 0.1198288   | 0           |            |
| 0.08242544  | 0           | 0           | 0.05962448 | 0.07030366  | 0           | 0           | 0.2610454  |
| 0.07586526  | 0.03416128  | 0.050480534 | 0.08434727 | 0           | 0.1382525   | 0.06549414  |            |
| 0.1760002   | 0           | 0.06040362  | 0.04271873 | 0.1262604   | 0.09811065  | 0.2187579   |            |
| 0.044460095 | 0.1670929   | 0.2438018   | 0.1125599  | 0.2069948   | 0.1649004   |             |            |
| 0.0435884   | 0           | 0.2661969   | 0          | 0.1168888   | 0           | 0.1019858   | 0          |
| 0.09869196  | 0           | 0.03240381  | 0.05873151 | 0           | 0           | 0.03769553  | 0.1112444  |
| 0.1121794   | 0.146741154 | 0.060863574 | 0.04051176 | 0           | 0           | 0.0498753   | 0          |
| 0           | 0           | 0.5478036   | 0          | 0.06136794  | 0.06981246  | 0           | 0          |
| 0.03721105  | 0.09234482  | 0.180634388 | 0.1915579  | 0           | 0.1014406   | 0           | 0          |
| 0.4214045   | 0           | 0.1717541   | 0          | 0.03458087  | 0           | 0.05278964  | 0          |
| 0           | 0           | 0.165586399 | 0.06230826 | 0.1072352   | 0.2309477   | 0           | 0.1443967  |
| 0.045649103 | 0           | 0.4116058   | 0.09199505 | 0.1028334   | 0           | 0.07570222  | 0          |
| 0.255146105 | 0.20155314  | 0.05081296  | 0.03339686 | 0.1518641   | 0.05277852  |             |            |
| 0.0542101   | 0           | 0           | 0.04578064 | 0.04240614  | 0           | 0.09598887  | 0          |
| 0           | 5.4248450   | 0.07370902  | 0          | 0.1388724   | 0           | 0           | 0.07535742 |
| 0.2539578   | 0           | 0.1733844   | 0          | 0.2492816   | 0           | 0.03915275  | 0          |
| 0.2535043   | 0.0607782   | 0.1268418   | 0          | 0           | 0.05503689  | 0.04187287  |            |
| 0.2533173   | 0.1192773   | 0.08429917  | 0.07831382 | 0           | 0.1216074   | 0.03730955  |            |
| 0.08646142  | 0.07405347  | 0.2118153   | 0.06791776 | 0.3002550   | 0.04269814  | 0           | 0          |
| 0.04594384  | 0           | 0.2095439   | 0.05809975 | 0.1008295   | 0.1356041   | 0.073928011 |            |
| 0           | 0.09587776  | 0.1007726   | 0          | 0           | 0.043152587 | 0           | 0          |
| 0.05561159  | 0           | 0.06027177  | 0.1360664  | 0           | 0.04263855  | 0.06734101  | 0          |
| 0.04239662  | 0.08962049  | 0.04116546  | 0          | 0.2666216   | 0           | 0           | 0.3302127  |
| 0.1940498   | 0.07106707  | 0.2039142   | 0.1121682  | 0.3069617   |             |             |            |
| AC127024.6  | 0.2793677   | 0.2871409   | 0.1211964  | 0.074639528 | 0.147510321 |             |            |
| 0.1083789   | 0.2854740   | 0.2191584   | 0.1234346  | 0.06067862  | 0           | 0.178490953 |            |
| 0.3192253   | 0.40049522  | 0.384574263 | 0.2817880  | 0.3841928   | 0.6040356   |             |            |
| 0.3102190   | 0.4061011   | 0.444800312 | 0.4238253  | 0.2198137   | 0.1140405   |             |            |
| 0.6638356   | 0.0451923   | 1.7386720   | 0.5808076  | 0.3518175   | 0.484470221 |             |            |
| 0.3085719   | 0.551957193 | 0.3278147   | 0.1379255  | 0.23552     | 0.836193242 |             |            |
| 0.4277842   | 0.6996149   | 1.0811360   | 0.3613765  | 0.1734908   | 0.1375737   |             |            |
| 0.4166953   | 0.5528278   | 0.2039173   | 0.7059081  | 0.3945472   | 0.05543583  |             |            |
| 1.1075860   | 0.3420488   | 0.1479823   | 0.4985926  | 0.231704452 | 0.8815338   |             |            |
| 0.1850862   | 0.4696658   | 0.1800696   | 0.2624862  | 0.9061347   | 0.6062757   |             |            |
| 0.2040143   | 0.1708233   | 0.6646041   | 0.05546331 | 0.765354262 | 0.4095888   |             |            |
| 0.1973789   | 0.2049006   | 0.367425374 | 0.2147535  | 0.2468194   | 0.6008634   |             |            |
| 0.234563794 | 0.8746570   | 0.3006119   | 0.2127529  | 0.4182041   | 0.2948102   |             |            |
| 0.6652198   | 0.5866475   | 0.7780680   | 0.05550004 | 0.05931297  | 0.067823293 |             |            |
| 0.1988252   | 0.2389502   | 0.1754541   | 2.5880560  | 0.6658309   | 0.8253381   |             |            |
| 0.075950969 | 0.1585893   | 0.2197822   | 0.9931077  | 0.511924973 | 0.6936522   |             |            |

|                    |                                           |                           |                           |                     |                   |
|--------------------|-------------------------------------------|---------------------------|---------------------------|---------------------|-------------------|
| 0.9365627          | 0.07285015                                | 1.75862                   | 0.5385526                 | 0.9136161           | 1.9104440.5591012 |
| 0.5165887          | 0.3655216                                 | 0.153821964               | 1.9603870.234435854       | 0.3837301           |                   |
| 0.8776655          | 0.3723894                                 | 0.2151094                 | 0.2796823                 | 0.1353288           | 0.2746308         |
| 0.6833374          | 0.1454305                                 | 0.1320594                 | 0.8354658                 | 0.4927243           | 0.3184211         |
| 0.2700745          | 2.4244340.7275317                         | 0.1072854                 | 0.5882876                 | 0.2852369           |                   |
| 0.36325978         | 1.02862                                   | 0.3660673                 | 0.07832745                | 0.2888147           | 0.539713306       |
| 0.6449651          | 0.3651669                                 | 0.3567192                 | 0.3962968                 | 0.8930627           | 2.222371          |
| 3.2907290.3174634  | 0.3346309                                 | 0.8583892                 | 0.1581805                 | 0.3520857           |                   |
| 1.7566610.7646818  | 0.4159136                                 | 0.3675884                 | 0.1075290.6328367         | 1.021492            |                   |
| 0.062349751        | 0.07924467                                | 0.2198924                 | 0.443226818               | 0.1991067           | 1.006882          |
| 0.6385438          | 0.1505647                                 | 0.7745576                 | 0                         | 0.143333052         | 0.1203898         |
| 0.6118923          | 1.0728240.2583445                         | 0.2848840.6989358         | 0.3923201                 | 0.1982915           |                   |
| 0.064348629        | 0.2794780.1205089                         | 0.2326126                 | 0.1893929                 | 0.3821529           |                   |
| 0.4025786          | 1.0173761.4613040.2220860.7340470.5416171 | 0.3151536                 |                           |                     |                   |
| 0.4588291          | 0.3907631                                 | 0.3349495                 | 0.8756774                 | 0.1692649           | 0.7279355         |
| 0.097040359        | 0.3954753                                 | 5.2176080.05960619        | 0.7968317                 | 0.3240161           |                   |
| 0.4075107          | 0.044016119                               | 0.5532177                 | 1.6879240.1397322         | 0.1496663           |                   |
| 0.30534654         | 0.09065833                                | 1.2475370.3293230.5845077 | 0.2772151                 | 0.7006694           |                   |
| 0                  | 0.2670013                                 | 1.1420590.22454           | 0.1756019                 | 0.6401683           | 0.4787948         |
| 0.164565243        | 0                                         | 1.3812890.242499908       | 0.052084665               | 0.7445870.119970225 |                   |
| 0.1961077          | 0.4134087                                 | 2.1030960.061157375       | 0.9900313                 | 0.3160496           |                   |
| 0.9676745          | 1.256323824                               | 0.4992183                 | 0.6036176                 | 0.5202158           | 0.1805609         |
| 0.2838676          | 0.5115442                                 | 0.5927029                 | 0.7528802                 | 0.1577973           | 0.2680334         |
| 0.2758684          | 0.458610887                               | 0.1702860.390515149       | 0.6280056                 | 0.6611201           |                   |
| 0.2131927          | 1.2106870.3658408                         | 1.2074090.5098063         | 0.2475905                 | 0.1656162           |                   |
| 0.448795299        | 0.3373384                                 | 0.3691527                 | 0.1988381                 | 0.6268426           | 0.08322803        |
| 0.4399961          | 0.3401299                                 | 0.4836747                 | 0.2713582                 | 1.12092             | 0.7872017         |
| 0.6691618          | 0.2608611                                 | 0.4512409                 | 0.888526531               | 0.7125402           | 0.6973611         |
| 0.8523322          | 0.4252236                                 | 2.4899950.1112168         | 0.9910085                 | 0.3805115           |                   |
| 0.6176163          | 0.2264755                                 | 0.592502016               | 0.307188794               | 0.7769849           | 0.7244057         |
| 0.1097122          | 0.6041498                                 | 0                         | 0.2403048                 | 0.1308065           | 0.2540778         |
| 0.4023196          | 0.4955751                                 | 0.4228264                 | 0.07228238                | 0.4862308           | 0.5324469         |
| 0.3818215          | 0.1878105                                 | 0.0932160.182338486       | 1.9336510.2055222         | 0.2730603           |                   |
| 1.31269            | 0.6155942                                 | 1.7714120.1417933         | 0.07594267                | 0.2167180.4977424   |                   |
| 0.8028633          | 0.302094029                               | 0.3197259                 | 0.3251960.2864667         | 0.6284928           |                   |
| 0.5554348          | 0.401156484                               | 0.06289608                | 0.4329875                 | 0.7382336           | 0.2514888         |
| 0.2186384          | 0.4395479                                 | 0.230398775               | 0.4777519                 | 0.5712971           | 1.300081          |
| 0.1384047          | 0.113738129                               | 0.6877475                 | 0.5142211                 | 0.5079151           | 0.386329716       |
| 0.254318232        | 0.2051693                                 | 0.2022715                 | 0.5620880.3729350.2736076 | 0.3748533           |                   |
| 1.2682460.2772752  | 0.1712248                                 | 0.2930701                 | 0.5167703                 | 0.2638226           |                   |
| 0.880965428        | 0.2672611                                 | 2.26594                   | 0.7952254                 | 0.1860110.5192053   | 0.4205474         |
| 0.3923230.3070256  | 0.1521367                                 | 0.5702356                 | 0.5981586                 | 0.3187352           |                   |
| 0.8400966          | 0.4684104                                 | 0.3145416                 | 0.1800069                 | 0.7904424           | 0.3286057         |
| 1.0452420.08529861 | 0.2454063                                 | 0.5975129                 | 1.16933                   | 0.3084917           | 0.1111122         |

|             |             |             |             |             |             |
|-------------|-------------|-------------|-------------|-------------|-------------|
| 0.3381432   | 1.4703160   | 0.1204026   | 0.08509444  | 0.5928948   | 0.1307774   |
| 0.4296412   | 0.5272614   | 0.08727709  | 0.2616323   | 0.4276271   | 0.4799095   |
| 0.6566898   | 0.4310095   | 0.5965235   | 0.4853064   | 0.1855091   | 0.1901703   |
| 0.7932026   | 8.9731220   | 0.5089036   | 0.1825112   | 0.597003564 | 0.7538729   |
| 0.5323025   | 0.2543081   | 1.2724280   | 0.2962722   | 0.087119374 | 0.183949793 |
| 0.4786747   | 0.304596687 | 0.1924766   | 1.4034060   | 0.9430257   | 0.2403625   |
| 0.3582574   | 0.2582448   | 0.4758341   | 0.5686596   | 0.4707624   | 0.2261649   |
| 0.207769067 | 0.2583014   | 0.9150656   | 0.2276828   | 0.9148885   | 0.6666559   |
| 0.3917610   | 0.4304251   | 0.7204327   | 0.8491980   | 0.6197151   |             |
| STARD13-AS  | 0.04806101  | 0.03039893  | 0.03849234  | 0.047411476 | 0.042945577 |
| 0.09752749  | 0.1148454   | 0.07540583  | 0.02613547  | 0.2601681   | 0.03513649  |
| 0.094482103 | 0.08636664  | 0.164298039 | 0.027142653 | 0.2804230   | 0.0464841   |
| 0.07815847  | 0.05747377  | 0.01074824  | 0.007848328 | 0.01922974  | 0.01163558  |
| 0.01609761  | 0.005019909 | 0.03349083  | 0.0900764   | 0.007686093 | 0.0372461   |
| 0.041031785 | 0.0513351   | 0.011686884 | 0.03470497  | 0.06327467  | 0.01870046  |
| 0.020119506 | 0.005032057 | 0           | 0.01907622  | 0.1147743   | 0           |
| 0.01764582  | 0.03724419  | 0.01439217  | 0           | 0.004641088 | 0.01173772  |
| 0.05430918  | 0.01034626  | 0.006266615 | 0.02639242  | 0.009812004 | 0.134156    |
| 0.04408795  | 0.005524714 | 0.03431439  | 0.0277888   | 0.4616649   | 0.01426333  |
| 0.00539963  | 0.00602822  | 0.01279274  | 0           | 0.006752189 | 0.006194602 |
| 0           | 0.011113848 | 0.01705159  | 0.02613019  | 0.004543715 | 0.00620818  |
| 0.01909505  | 0.02815456  | 0.0189747   | 0.0468163   | 0.007042526 | 0.01129218  |
| 0.01830494  | 0           | 0.006279326 | 0.007180294 | 0.007016388 | 0.08673292  |
| 0.03524498  | 0           | 0.040203759 | 0.008394741 | 0.01661988  | 0.0210276   |
| 0.01468707  | 0.08056076  | 0.007712475 | 0.02190365  | 0.0380102   | 0.04145246  |
| 0.08764352  | 0.03766684  | 0.004206926 | 0.01934846  | 0.028498351 | 4.993205    |
| 0.004963835 | 0.08937414  | 0           | 0           | 0.04554627  | 0.01850582  |
| 0.03488943  | 0.1507153   | 0.04105704  | 0.05126302  | 0.03790663  | 0.008693928 |
| 0.01123683  | 0           | 0.05274024  | 0           | 0.01135806  | 0           |
| 0.007259838 | 0.02153038  | 0.04975407  | 0.03567216  | 0.019046063 | 0           |
| 0.009441257 | 0.01864667  | 0.04449245  | 0           | 0.04645091  | 0.02688729  |
| 0.04276502  | 0.0167462   | 0.007454898 | 18.817150   | 0.01619102  | 0.03302385  |
| 0.03113258  | 0.01517847  | 0.03349847  | 0.01802383  | 0.013201645 | 0           |
| 0.009384678 | 0.00526974  | 0           | 0.02253372  | 0.01062662  | 0.01261548  |
| 0           | 0           | 0.006477961 | 0.03785911  | 0.03829046  | 0.09550667  |
| 0.06749277  | 0.01679412  | 0.027249756 | 0.007396922 | 0.06379     | 0.03693922  |
| 0.01503794  | 0           | 0.02841337  | 0.01958314  | 0.0067263   | 0.03291642  |
| 0.03822649  | 0.02859821  | 0.1025476   | 0           | 0.03989286  | 0.0570498   |
| 0.02568828  | 0.005136718 | 0.0119623   | 0.004721162 | 0.03786221  | 0.00937319  |
| 0.02286855  | 0.0215711   | 0.009319767 | 0.06921657  | 0.06917286  | 0.007396559 |
| 0.03168964  | 0.043101767 | 0.0671845   | 0.006951256 | 0.005810776 | 0           |
| 0.05934259  | 0.005292149 | 0.08197372  | 0.006363535 | 0.00792384  | 0.006196853 |
| 0.03189323  | 0.04505679  | 0.026133207 | 0.015334534 | 0.08124101  | 0.015403739 |
| 0.03678625  | 0.031752419 | 0.005190367 | 0.02188331  | 0.00397589  | 0.038847531 |

|             |             |             |             |             |             |
|-------------|-------------|-------------|-------------|-------------|-------------|
| 0.02994637  | 0.04600672  | 0.01707424  | 0.028000857 | 0.01761702  | 0.009129084 |
| 0.01502019  | 0.0700904   | 0.0150262   | 0.02707799  | 0.03137404  | 0.003985283 |
| 0.05846973  | 0.01216117  | 0.04380832  | 0           | 0           | 0.015503598 |
| 0.006999124 | 0           | 0.1214267   | 0.04518583  | 0           | 0.0067465   |
| 0.023756455 | 0.03571323  | 0.01302711  | 0.009021654 | 0.01769663  | 0.01762231  |
| 0.01397441  | 0.04201021  | 0.005689501 | 0.1687774   | 0.03122872  | 0.0059528   |
| 0.01089886  | 0.02761675  | 0.03715586  | 0.004479344 | 0.003592141 | 0.01054686  |
| 0.05540607  | 0           | 0.02354852  | 0.02098315  | 0           | 0.005944145 |
| 0.015681701 | 0.019512816 | 0           | 0.009586393 | 0.07549731  | 0.01598998  |
| 0.04070482  | 0.06093197  | 0.0215189   | 0.6120280   | 0.0532408   | 0.01311634  |
| 0.01492122  | 0.01530473  | 0.0411809   | 0           | 0.0230986   | 0.04374273  |
| 0.077214999 | 0.04094221  | 0           | 0.02890826  | 0.01208447  | 0.01955146  |
| 0.8706571   | 0.04019937  | 0.01376606  | 0           | 0.1736901   | 0.019988743 |
| 0.02582081  | 0           | 0.009505296 | 0.04276552  | 0.03539125  | 0.009987991 |
| 0.004113425 | 0.03993679  | 0.1080181   | 0.007755653 | 0.043905205 | 0.01379413  |
| 0.03299012  | 0.009831181 | 0.01098944  | 0.040137301 | 0.008090025 | 0           |
| 0.02726655  | 0.021539262 | 0.03529629  | 0.01784501  | 0           | 0.005640252 |
| 0.02976363  | 0.05253895  | 0.01956965  | 0.0634451   | 0.00620533  | 0.006838658 |
| 0.004655047 | 0.013323679 | 0.02263545  | 4.8577690   | 0.03238025  | 0.01575404  |
| 0.01998802  | 0.01978772  | 0.005191789 | 0.02031505  | 0           | 0.006707723 |
| 0           | 0.003705794 | 0           | 0.01331992  | 0.03493768  | 0.004184114 |
| 0.01106573  | 0.003010121 | 0.01948545  | 0.02259189  | 0.006515486 | 0           |
| 0.03132363  | 0.006767779 | 0.01274674  | 0.0180175   | 0.008369118 | 0           |
| 0.01196141  | 0.03233938  | 0.007913829 | 0.03018126  | 0           | 0           |
| 0.06873795  | 0.02013288  | 0.0223932   | 0           | 0.01077529  | 0.0579661   |
| 0.05804419  | 0.01024611  | 0.005384602 | 0.03169624  | 0.09801765  | 0.009223125 |
| 0.053554422 | 0.02252274  | 0.012898776 | 0           | 0.04754409  | 1.2862210   |
| 0.007270463 | 0.02167307  | 0.03645303  | 0.007196493 | 0           | 0.07702317  |
| 0.017596821 | 0.01367289  | 0.01139716  | 0.01807819  | 0.07264283  | 0           |
| 0.01898671  | 0.005447895 | 0.04195455  | 0.02050243  |             |             |
| AC015849.4  | 0           | 0           | 0           | 0.150342803 | 0           |
| 0.059920953 | 0.2500556   | 0           | 0           | 0.1135184   | 0.05527578  |
| 0.03905369  | 0.2044975   | 0.074661652 | 0.1219558   | 0.11069     | 0.1914219   |
| 0.1432641   | 0.3186004   | 0.1117699   | 0.4021506   | 0.05905409  | 0.04879225  |
| 0.08879165  | 0.111178076 | 0.04126883  | 0.04630277  | 0           | 0.07655926  |
| 0.4227602   | 0.09073665  | 0           | 0           | 0.04618468  | 0.2517988   |
| 0.1369136   | 0.1895836   | 0           | 0.1116617   | 0           | 0           |
| 0.1255364   | 0.046671111 | 0           | 0.1398038   | 0.1051139   | 0           |
| 0.33922     | 0.1027340   | 0.3440811   | 0.06084909  | 0.05585854  | 0.064234008 |
| 0.3975707   | 0.2063607   | 0           | 0.1622129   | 0           | 0.1296739   |
| 0.03262555  | 0           | 0           | 0.1203383   | 0.3958813   | 0.0669960   |
| 0           | 0.02986781  | 0.204919782 | 0           | 0           | 0.0883522   |
| 0.038246094 | 0.03992986  | 0.0316212   | 0.1000184   | 0.257786447 | 0.3492976   |
| 0.3668464   | 0.05209271  | 0.2892748   | 0.1314466   | 0.06413527  | 0.2559479   |

|                           |             |             |                    |                    |                    |                   |            |            |            |
|---------------------------|-------------|-------------|--------------------|--------------------|--------------------|-------------------|------------|------------|------------|
| 0.04002076                | 0.04601578  | 0.077459041 | 6.2714840          | 0                  | 0.1894114          | 0.04167144        |            |            |            |
| 0.2166423                 | 0.3873035   | 0.1362932   | 0.05531757         | 0.05735056         | 0.2441114          |                   |            |            |            |
| 0.08866698                | 0.1202027   | 0.08270589  | 0                  | 0.2175992          | 0.06689617         | 0.1274289         |            |            |            |
| 0.1080499                 | 0           | 0.05745389  | 0                  | 0.06906331         | 0.1228920.2366568  | 0.09695757        |            |            |            |
| 0                         | 0.09279444  | 0.06129484  | 0.08981528         | 0                  | 0.1587223          | 0.9592319         |            |            |            |
| 0.2209453                 | 0           | 0           | 0.05085329         | 0                  | 0.03545946         | 3.6991920.7701309 | 0          | 0          |            |
| 0.07219686                | 0.05311218  | 0           | 0                  | 0                  | 0.1107297          | 0.04463852        | 0.05013137 | 0          |            |
| 0.05359117                | 0.2021835   | 0.1200118   | 0.2145919          | 0                  | 0.1212477          | 0.05950482        |            |            |            |
| 0.1232505                 | 0.2160937   | 0.05203709  | 0.0478190.2737452  | 0                  | 0.07988179         | 0                 |            |            |            |
| 0.07036739                | 0.06068383  | 0.03904502  | 0.09537126         | 0.4198648          | 0.0450497          |                   |            |            |            |
| 0.3260173                 | 0.1919632   | 0.04473371  | 0                  | 0.04545638         | 0.04534276         | 0.05134429        |            |            |            |
| 0                         | 0.1265011   | 0           | 0.05682368         | 0.4276549          | 0.048865929        | 0.1137981         | 0          | 0          |            |
| 0                         | 0           | 0.1231244   | 0                  | 0                  | 0.1645115          | 0.03518197        | 0.2260992  | 0          |            |
| 0.1217391                 | 0           | 0.05527828  | 0.0735841          | 0.0930635          | 0.07056623         | 0                 |            |            |            |
| 0.1075616                 | 0.1210734   | 0           | 0.1768532          | 0.0379253          | 0.3214711          | 0.082868959       |            |            |            |
| 0.145878402               | 0.0772851   | 0           | 0.104911629        | 0                  | 0.120825119        | 0.0493763         | 0          |            |            |
| 0.2647603                 | 0.061593176 | 0.2848818   | 0.1193631          | 0.2436425          | 0.066593487        |                   |            |            |            |
| 0.1675919                 | 0           | 0.2381467   | 0.1818476          | 0.3573630.1030379  | 0.09948774         |                   |            |            |            |
| 0.1895613                 | 0           | 0.07712668  | 0.03472928         | 0                  | 0.08574972         | 0                 | 0.03513782 |            |            |
| 0.09987467                | 0.03578532  | 0           | 0.06140795         | 0.3474322          | 0                  | 0                 | 0.277994   |            |            |
| 0.045199337               | 0.3397422   | 0           | 0.1716471          | 0                  | 0.1257317          | 0                 | 0.1141845  |            |            |
| 0.2706230.1024845         | 0.1188323   | 0           | 0                  | 0                  | 0.2019806          | 0.340898314       |            |            |            |
| 0.06834454                | 0.1003329   | 0.09035851  | 0.03294259         | 0.05970805         | 0.1120093          |                   |            |            |            |
| 0.1497105                 | 0.0383223   | 0.1696411   | 0                  | 0.09945402         | 0.061875558        | 0.123556          |            |            |            |
| 0.09119597                | 0           | 0.4056366   | 0.05635344         | 0.04840345         | 0                  | 0                 | 1.518851   |            |            |
| 0.1012966                 | 0.3119415   | 0.1064599   | 0.03639873         | 0.1958783          | 0.3753687          |                   |            |            |            |
| 0.05493462                | 0.1891488   | 0           | 0.183637811        | 0.4381716          | 0                  | 0                 | 0          | 0          |            |
| 0.1019449                 | 2.1420560   | 0.08730494  | 0.06266116         | 0.3515584          | 0.114092519        | 0                 |            |            |            |
| 0                         | 0.0577016   | 0.04521224  | 0                  | 0.033667923        | 0.0950164          | 0.07267882        |            |            |            |
| 0.03913127                | 0           | 0.07339881  | 0                  | 0.092816229        | 0.04374148         | 0.2615310         |            |            |            |
| 0.1045432                 | 0.038182872 | 0.07696092  | 0                  | 0.0639418          | 0                  | 0                 | 0.05165783 |            |            |
| 0.2037129                 | 0.1029261   | 0           | 0                  | 0                  | 0                  | 0.1396255         | 0          | 0          | 0.09758489 |
| 0.04428376                | 0           | 0.05383312  | 10.079220.06160708 | 0.1873365          | 0.1426105          |                   |            |            |            |
| 0.09412093                | 0.04938983  | 0           | 0.07661039         | 0.2552440.1721203  | 0.3210065          |                   |            |            |            |
| 0.1762673                 | 0           | 0.0633566   | 0                  | 0.1592150.06618946 | 0.2105380.02863548 |                   |            |            |            |
| 0.1235775                 | 0.1289509   | 0           | 0                  | 0                  | 0                  | 0.1287646         | 0.1212605  | 0.08570082 |            |
| 0.1194239                 | 0.1317093   | 0.06181469  | 0.1896495          | 0.04394951         | 0                  | 0.1435581         |            |            |            |
| 0.1380941                 | 0.2543728   | 0.04340808  | 0                  | 0.04887646         | 0.04670776         | 0                 |            |            |            |
| 0.1065141.0041180.0512530 | 0.075157218 | 0.1035334   | 0.04873596         | 0                  | 0                  |                   |            |            |            |
| 0.03729793                | 0.043870089 | 0.0926303   | 0.1071302          | 0                  | 0.06461607         | 0.1696087         |            |            |            |
| 5.2439580.03063696        | 0.1383288   | 0           | 0.04334751         | 0.0684607          | 0.09545197         |                   |            |            |            |
| 0.0862031                 | 0.1822212   | 0           | 0.3251776          | 0.1084219          | 0.05732632         | 0                 |            |            |            |
| 0.07460071                | 0.1578211   | 0.1806218   | 0.4664356          | 0                  | 0.3120655          |                   |            |            |            |
| AC093249.2                | 0.06143771  | 0.1262943   | 0                  | 0                  | 0                  | 0.04766873        | 0.2008979  |            |            |

|             |             |             |             |             |             |             |  |
|-------------|-------------|-------------|-------------|-------------|-------------|-------------|--|
| 0.04819667  | 0.05429075  | 0           | 0           | 0.104675192 | 0.1872082   | 0.264227137 |  |
| 0.056382949 | 0           | 0.1931212   | 0.4132729   | 0.03411121  | 0.5060817   | 0.130425541 |  |
| 0.3195648   | 0.4189534   | 0.3343927   | 0.6673771   | 0.2385254   | 0.7809981   | 1.21343     |  |
| 0.2063218   | 0.213086487 | 0.07755453  | 0.356062012 | 0.2883681   | 0.6875289   |             |  |
| 0.4661536   | 1.136793831 | 0.3344961   | 0.6769718   | 0.4755203   | 0.3178914   |             |  |
| 0.5087145   | 0.04033973  | 1.3195930   | 0.7957718   | 0.05979318  | 0.7865554   |             |  |
| 0.5013242   | 0.2925908   | 0.6285861   | 0           | 0.2149210   | 0.1041402   | 0.1644735   |  |
| 0.244587605 | 0.3392625   | 0.2442217   | 1.6985060   | 0.1900818   | 0.4288157   |             |  |
| 0.09963721  | 0.4148055   | 0.04486622  | 0.2003570   | 0.3720379   | 0.6830502   |             |  |
| 0.22441923  | 0.1544152   | 0.2430790   | 0.09012226  | 0.277039168 | 0.1889118   | 0           |  |
| 0.6418232   | 0.154753706 | 0.3134625   | 0.2115509   | 1.1696990   | 0.3678808   |             |  |
| 0.6483378   | 0.1755518   | 0.1407423   | 0.1520981   | 0.1464648   | 0.6000209   | 0           |  |
| 0.1457502   | 0.2101969   | 0           | 0.04742979  | 1.69856     | 0.7260236   | 0.133623282 |  |
| 0.6626534   | 0.3314321   | 0.2620815   | 0.825594078 | 0.5491653   | 0.1544745   |             |  |
| 0.2563358   | 0.3640005   | 0.4737475   | 0.07654085  | 0.6162042   | 0.2235561   |             |  |
| 0.06991178  | 0.2411532   | 0.1014842   | 0.4057622   | 0.371206315 | 0.2025331   |             |  |
| 0.4411739   | 0.2547837   | 0.06307497  | 1.1071240   | 0.5357      | 0.09663359  | 0.7012951   |  |
| 0.4264352   | 0.07744564  | 1.0499040   | 0.8668676   | 0.09336828  | 0.09503036  |             |  |
| 0.6135156   | 0.2782550   | 0.3881234   | 0.4014621   | 0.639096044 | 0.4825834   |             |  |
| 0.2146785   | 0.1033532   | 0.08468701  | 0.316512367 | 0.4863045   | 0.1070752   |             |  |
| 0.8629348   | 0.5035473   | 0.2772701   | 0.9076550   | 0.7076055   | 0.1117050   | 0.1766185   |  |
| 0.1332525   | 0           | 0.3097185   | 0.4214396   | 0.1793776   | 0.8689316   | 0.1293423   |  |
| 0.4414194   | 0.04639052  | 0.5990493   | 0.329082504 | 0.2788360   | 0.4835808   |             |  |
| 0.194946235 | 0.8757389   | 0.2657165   | 0.3276622   | 0.1324470   | 0.4717063   |             |  |
| 0.0937170   | 0.42028502  | 0.1059031   | 0.05197412  | 0.3767835   | 0.1887457   |             |  |
| 0.1363545   | 0.1670689   | 0.1878652   | 0.3019725   | 0.06977227  | 0           | 0.06146198  |  |
| 0.2120157   | 0.3410364   | 0           | 0.3056070   | 0.4328323   | 0.5695158   | 0.3353381   |  |
| 0.1953620   | 0.1844908   | 0.4367396   | 0.2376262   | 0.3139246   | 0.09821194  |             |  |
| 0.1473222   | 0.2370171   | 1.1415430   | 0.2668090   | 0.170726606 | 0.3975851   | 1.059176    |  |
| 0.05243366  | 0.6620058   | 0.1425133   | 0.1075422   | 0.193597867 | 0.7078515   |             |  |
| 0.2394859   | 0.1229179   | 0.3291416   | 0.268603595 | 0.1860816   | 0.7508654   |             |  |
| 0.3379774   | 0.8033949   | 0.2845001   | 0.4314495   | 0.1319194   | 0.2113852   |             |  |
| 1.0046330   | 0.5663950   | 0.3312562   | 0.6083719   | 0.144762787 | 0.127416612 | 1.28258     |  |
| 0.469302726 | 0.091634432 | 1.83397     | 0.105533973 | 0.3018920   | 1.0901940   | 0.376587322 |  |
| 2.1772470   | 0.5212851   | 0.3901482   | 0.523491124 | 0.2927642   | 0.1517095   |             |  |
| 1.1232420   | 0.6088624   | 1.1236920   | 0.5399869   | 0.1737939   | 0.4967135   | 0           |  |
| 0.3031462   | 0.1213363   | 0.493075421 | 0.8238734   | 0.300583237 | 0.4603637   |             |  |
| 0.5234096   | 0.1562823   | 1.4573721   | 0.0727280   | 0.8345220   | 0.7287480   | 0.1306785   |  |
| 0.2428122   | 0           | 0.2967458   | 1.08244     | 0.3498231   | 0.6249352   | 0.4392782   |  |
| 0.3096404   | 0.0498669   | 0.4727480   | 0.08951443  | 0.3113802   | 0.6924762   |             |  |
| 0.1811201   | 0.1529808   | 0.4410469   | 0.521072267 | 0.8655793   | 0           | 0.5919232   |  |
| 0.3452821   | 1.8253070   | 0.2445846   | 0.4794672   | 0.2343067   | 1.1359850   | 0.09961161  |  |
| 0.130301273 | 0.270224168 | 0.4676502   | 1.5134370   | 0.2412757   | 0.3100133   |             |  |
| 0.3937726   | 0.0422777   | 0.1380795   | 0.2682049   | 0.4422103   | 0.2654308   |             |  |



|             |             |             |             |             |             |
|-------------|-------------|-------------|-------------|-------------|-------------|
| 0.3814488   | 0.2789602   | 0.09537675  | 0.08554435  | 0.1170941   | 0.04798231  |
| 0.1652109   | 0.2459974   | 0.240596011 | 1.1481550   | 0.3163848   | 0.03002531  |
| 0.2008229   | 0.1624556   | 0.4897373   | 0.3741932   | 0.06680434  | 0.1525120   |
| 0.4605999   | 0.298960273 | 0.04687545  | 0           | 0.5039912   | 0.3554133   |
| 0.088221135 | 0.1106553   | 0.03174044  | 1.3671590   | 0.16592     | 0.1602744   |
| 0.202674441 | 0.1146172   | 1.4619690   | 0.4492870   | 0.1826253   | 0.166752997 |
| 0.1292411   | 0.05584958  | 0.28320159  | 0.402688121 | 0.06768033  | 0.2668977   |
| 0.3146506   | 0.09373115  | 0.1925471   | 0.1648732   | 0.8245999   | 0.2439101   |
| 0.4518630   | 0.1031218   | 0.1136466   | 0.2320763   | 0.258319047 | 0.1410606   |
| 0.4983188   | 0.2152413   | 0.1963535   | 0.2906453   | 0.2055234   | 0.1294177   |
| 0.4051210   | 0.6691488   | 0.1114707   | 0.6013497   | 0.2002723   | 0.8313819   |
| 0.5768639   | 0.4427076   | 0.02639106  | 2.2945790   | 0.05781279  | 0.8734923   |
| 0.1250574   | 0.05396902  | 0.9010508   | 0.2706901   | 0.7236542   | 0.3909674   |
| 0.1487269   | 1.0684530   | 0.1059143   | 0.2994194   | 0.2433903   | 0.3067753   |
| 0.4319333   | 0.6957225   | 0           | 0.2959066   | 0.25078     | 0.06030872  |
| 0.6066325   | 0.4081332   | 0.4695994   | 0           | 0.5018601   | 0.6047212   |
| 0.4476662   | 0.2408239   | 0.656456202 | 0.09043062  | 0.6810901   | 0.4026721   |
| 0.09773295  | 0.114954195 | 0.040453689 | 0           | 0.482299153 | 0.5643852   |
| 0.7633839   | 0.4013950   | 0.1812336   | 0.1350633   | 0.3407546   | 0.1793897   |
| 0.2292729   | 0.3388211   | 0.2785301   | 0.511749868 | 0.2840244   | 0.3788019   |
| 0.9012839   | 0.1341330   | 0.1954786   | 0.3446196   | 0.0946578   | 0.3621381   |
| 0.4482074   | 1.635431    |             |             |             |             |
| DHDDS-AS1   | 0.2519062   | 0.1150735   | 0.09714039  | 0.179473497 | 0.059115667 |
| 0.08686703  | 0.1372866   | 0.2195727   | 0           | 0.07295199  | 0.1064058   |
| 0.3695799   | 0.12037569  | 0.359614496 | 0.3613704   | 0.1319722   | 0.1613807   |
| 0.09324161  | 0.2441213   | 0           | 0.1455862   | 0.3817307   | 0.2742146   |
| 0.3259997   | 0.2075526   | 0.9310488   | 0.09399536  | 0.11649265  | 0.1413281   |
| 0.501387202 | 0.4598081   | 0.2947972   | 0.5191234   | 0.060929014 | 0.2285829   |
| 0.5046750   | 0.07221196  | 0.1930985   | 0.09270336  | 0.07351134  | 0.2671891   |
| 0.8056333   | 0.1634422   | 0.2263176   | 0.1405486   | 0.1332975   | 0.1431845   |
| 0.07833037  | 0.04744385  | 0.09990702  | 0.111428379 | 0.2208001   | 0.2225233   |
| 0.3764429   | 0.1731936   | 0.2404411   | 0.1815695   | 0.6479165   | 0.12264     |
| 0.1452786   | 0.1778181   | 0.408960564 | 0.09379728  | 0.5695257   | 0.3284607   |
| 0.210354252 | 0.3012233   | 0           | 0.3095996   | 0.423012966 | 0.7270131   |
| 0.2984171   | 0.09577021  | 0.4725880   | 0.2132727   | 0.3419674   | 0.3464617   |
| 0.3113878   | 0.07131011  | 0           | 0.2390413   | 0.2736022   | 0.1406286   |
| 1.5209640   | 0.06963354  | 0.152189088 | 0.2224448   | 0.05033091  | 0.7561886   |
| 0.478699849 | 0.3891795   | 0.04691666  | 0.2919514   | 0.8291504   | 0.08633131  |
| 0.6625341   | 0.5614564   | 0.1222163   | 0.06370034  | 0.07324251  | 0.030822549 |
| 6.5623790   | 0.187903217 | 0           | 0.5024712   | 0.1326554   | 0.1724129   |
| 0.05423386  | 0.1320720   | 0.04564194  | 0.3496930   | 0.3175418   | 0.3348180   |
| 0.2552184   | 0.3030552   | 0.2661936   | 0.6845388   | 0.04299528  | 0.3143465   |
| 0.3657934   | 0.174694306 | 0.1374086   | 0.3912099   | 0.06278042  | 0.2314885   |
| 0.288391231 | 0.1846241   | 0.1463429   | 0.2859148   | 0.3529297   | 0.1263178   |

|             |             |             |             |             |             |
|-------------|-------------|-------------|-------------|-------------|-------------|
| 0.3816981   | 0.2930622   | 0.6106820   | 0.08046323  | 0.1214134   | 0.1267836   |
| 0.1128804   | 6.84793     | 0.4494614   | 0.1666799   | 0.1767760   | 0.1723717   |
| 0.4548547   | 0.199896366 | 0.3175779   | 0.3524929   | 0.355251741 | 0.2792763   |
| 0.2421084   | 0.1706002   | 0.1609060   | 0.5253070   | 0.2561716   | 0.306355206 |
| 0.1894255   | 0.09808784  | 0.6019169   | 0.1656530   | 0.3425070   | 0.2178577   |
| 0.1907197   | 0.103152433 | 0.2240051   | 0           | 0.5903991   | 0.07590038  |
| 0.03585241  | 0.6301124   | 0.2036963   | 0.1424037   | 0.3361987   | 0.1085282   |
| 0.2706423   | 0.1634476   | 0.1342292   | 0.2013496   | 0.2699485   | 0.2261131   |
| 0.7779323   | 0.15555808  | 0.3169783   | 2.3948070   | 0.09555018  | 0.5322253   |
| 0.2164191   | 0.1633124   | 0.176397301 | 0.3627906   | 1.0474      | 0           |
| 0.571057675 | 0.1453275   | 0.6315262   | 0.5279128   | 0.5563320   | 0.5184464   |
| 0.2527178   | 0.2403976   | 0.1498034   | 0.04817762  | 0.4799241   | 0.3284098   |
| 0.1207301   | 0.08527999  | 0.197851597 | 0.087072033 | 0.9841067   | 0.272113318 |
| 0.125239497 | 0.1193591   | 0.144236414 | 0.1964785   | 0.2761268   | 0.6020204   |
| 0.147055163 | 1.4170040   | 0.09499411  | 0.2262175   | 0.370984888 | 0.06668826  |
| 0.1382306   | 0.4927701   | 0.1688421   | 0.2275234   | 0.1230027   | 0.5542351   |
| 1.0258530   | 0.2762126   | 0.4422239   | 0.081684947 | 0.2047295   | 0.195626681 |
| 0.5033542   | 0.3709271   | 0.1708766   | 0.2042906   | 0.04887098  | 0.1036878   |
| 0.51077     | 0.1190681   | 0.4867260   | 0.323743452 | 0.4393689   | 0.2465670   |
| 0.3684428   | 0.5670205   | 0.2468636   | 0.2726183   | 0.5168950   | 0.05437423  |
| 1.1821460   | 0.1352040   | 0.1650281   | 0           | 0           | 0.135650463 |
| 0.3595551   | 0.1835195   | 0.7127719   | 0.08914161  | 0.3177222   | 0.1829908   |
| 0.4050222   | 0.63533     | 0.118724412 | 0.098486237 | 0.4261010   | 0.4354651   |
| 0.3631751   | 0.08969677  | 0.1540858   | 0.08387439  | 0.2036464   | 0.4432135   |
| 0.1612321   | 0.09930237  | 0.1412086   | 0.7531578   | 0.4676640   | 0.4267627   |
| 0.4214908   | 0.07471377  | 0.146146537 | 0.6586840   | 0.1647286   | 0.2462189   |
| 0.2960438   | 0.2028298   | 1.1364910   | 0.1389617   | 0.3989466   | 1.231053    |
| 0.090799529 | 0.2135535   | 0.3258107   | 0.09184263  | 0.07196353  | 0.2023581   |
| 0.321531851 | 0.05041198  | 0.0289204   | 0.4982765   | 0.2015713   | 0.2044483   |
| 0.2935859   | 0.295467919 | 0.1044338   | 1.9981160   | 0.4093693   | 0.05546654  |
| 0.243100022 | 0.2449947   | 0.1177584   | 0.6106503   | 0.361256016 | 0.244607025 |
| 0.3494472   | 0.3242462   | 0.1228692   | 0.2562103   | 0.08771993  | 0.2253371   |
| 0.4419628   | 0.07407982  | 0.2401679   | 0.09395972  | 0.3624230   | 0.7400997   |
| 0.336240293 | 0.08568523  | 8.62685     | 0.04902946  | 0.08945405  | 0.2269906   |
| 0.4119792   | 0.2751452   | 0.1230424   | 0.1219394   | 0.1015668   | 0.4451863   |
| 0.1459830   | 0.2805616   | 0.1501747   | 0.8571705   | 0.07213889  | 0.2534197   |
| 0.0526763   | 0.7121079   | 0.2506822   | 0.2458702   | 0.06841627  | 0.09865604  |
| 0.3708899   | 0.1781156   | 0.1016347   | 0.8198095   | 0.1930083   | 0           |
| 0.2445793   | 0.9346988   | 0.09055853  | 0.03497683  | 0.08987207  | 0.1713742   |
| 0.5495048   | 1.25513     | 0.2418216   | 0           | 0.7001622   | 0.1115159   |
| 0.5086093   | 0.2350349   | 0.4894710   | 0.5119973   | 0.358879269 | 0.1098615   |
| 0.3878609   | 0.3261298   | 0.05999217  | 0.1187329   | 0.244395372 | 0.07371901  |
| 0.097655195 | 0.2056965   | 0.7199022   | 0.0866790   | 0.4144966   | 0.08256579  |
| 0.6209592   | 0.4358707   | 0.1329381   | 0.1372080   | 0.2900383   | 0.099917676 |

|             |             |             |             |             |             |
|-------------|-------------|-------------|-------------|-------------|-------------|
| 0.2587897   | 0.5608631   | 0.2737359   | 0.1222157   | 0.5640180   | 0.3768015   |
| 0.5749850   | 0.6186811   | 0.3176332   | 1.055507    |             |             |
| MSC-AS1     | 0.5325058   | 1.0462090   | 0.5233586   | 0.694988555 | 0.547412586 |
| 1.308963    | 1.78364     | 1.0461990   | 0.6746084   | 0.3787103   | 0.2732024   |
| 1.645919122 | 1.199008    | 1.2193945   | 1.055233262 | 0.8898114   | 0.3369940   |
| 0.3894468   | 0.2930394   | 0.04795146  | 0.570227771 | 0.2001772   | 0.07168548  |
| 0.1718472   | 0.0479903   | 0.8568415   | 0.3694122   | 0.1347115   | 0.4272870   |
| 0.323617473 | 1.6358770   | 0.275592121 | 0.05529656  | 0.2016352   | 0.7786701   |
| 0.184648655 | 0.5067211   | 0.5617405   | 0.3221844   | 0.7396218   | 0.3550801   |
| 0.2104034   | 0.5229513   | 1.600549    | 0.4356985   | 0.1270125   | 0.1686013   |
| 2.7492080   | 0.3712499   | 0.3518991   | 0.2274934   | 0.1757325   | 0.2901580   |
| 0.171971605 | 0.07806709  | 0.08117404  | 0.0387319   | 0.06560907  | 0.4781894   |
| 1.1845790   | 0.2318075   | 0.9773467   | 0.4034082   | 0.8357066   | 0.2731859   |
| 0.352878169 | 1.0422780   | 0.02397192  | 0.04493206  | 0.747279797 | 0.03260262  |
| 0.05828771  | 0.0984592   | 2.290916338 | 0.6382437   | 1.0466120   | 0.8433599   |
| 0.05240386  | 0.2088630   | 0.03590747  | 0.4713956   | 0.1924947   | 1.6701590   |
| 0.1640829   | 0.581182154 | 0.5097824   | 0.4606479   | 1.04178     | 0.09822586  |
| 0.8805413   | 0.09085936  | 0.597020064 | 0.01070049  | 0.158886    | 0.05695672  |
| 0.120893803 | 0.3088982   | 0.6753714   | 6.6161480   | 0.05932965  | 0.2204489   |
| 0.4755423   | 0.08593554  | 0.08573684  | 0.0214497   | 0.6843932   | 1.066423882 |
| 0.9259114   | 0.540978267 | 0.4142624   | 0.02960934  | 0.8794173   | 0.2515772   |
| 0.1462502   | 0.1460966   | 0.4076634   | 0.07300241  | 0.1341059   | 1.3157750   |
| 0.2778302   | 0.2160961   | 0.02864641  | 1.47604     | 0.2196055   | 0.05976017  |
| 0.6623559   | 0.04300129  | 0.6197139   | 1.745126805 | 0.0138808   | 0.9056535   |
| 0.7742502   | 0.4611965   | 1.97860524  | 0.9045465   | 1.8397040   | 0.6318085   |
| 0.4813076   | 0.1701390   | 0.4070070   | 0.0296047   | 0.6554579   | 0.07676701  |
| 0.9573513   | 0.2810531   | 0.09740066  | 11.556390   | 0.01719845  | 0.1262831   |
| 0.5010060   | 0.03143964  | 0.5301836   | 0.2756923   | 0.185104544 | 0.3528935   |
| 0.3931749   | 0.218312484 | 1.2493910   | 0.6657854   | 0.1292533   | 1.5441750   |
| 0.2613084   | 1.8402180   | 0.551252896 | 0.004061528 | 0.6258895   | 0.03302894  |
| 0.07721234  | 0.1603676   | 1.486498    | 0.5698410   | 0.09595735  | 3.5187590   |
| 0.87704191  | 0.2027150   | 0.02032773  | 0.1778773   | 0.4312878   | 0.1195486   |
| 0.8088587   | 0.09984781  | 0.08145095  | 0.6803098   | 0.6261794   | 1.0689270   |
| 0.8885457   | 0.3130253   | 0.01883281  | 2.9719040   | 0.1090791   | 0.04949013  |
| 0.2087428   | 0.851187869 | 0.7090289   | 12.466090   | 0.9451242   | 0.1373984   |
| 1.1805650   | 0.7286426   | 0.288080035 | 2.2667810   | 0.08817228  | 0.2192043   |
| 0.4291831   | 1.950382396 | 1.0806673   | 4.245940    | 0.5629166   | 0.02957884  |
| 0.02493936  | 0.007091434 | 0.1686430   | 0.1657413   | 0.008111381 | 1.4645360   |
| 0.04344404  | 0.05335734  | 0.03589522  | 1.415722002 | 0.527752957 | 0.1190884   |
| 0.471230883 | 0.8399191   | 0.2779918   | 0.113326425 | 0.1091637   | 1.6364420   |
| 0.06588311  | 2.372719295 | 0.04771452  | 0.1705984   | 0.01632296  | 0.874447512 |
| 0.8084094   | 0.07563745  | 1.2668090   | 0.1218298   | 0.05746015  | 0.13461     |
| 4.3523990   | 0.05587895  | 1.911146    | 0.04133715  | 0.5258358   | 0.364449532 |
| 0.2412837   | 0.797063543 | 0.9934206   | 0.8810025   | 1.2035230   | 0.2493652   |
| 0.05348277  | 0.04946237  | 0.4256769   | 0.7083202   | 0.0260741   | 1.21126166  |
| 0.4353083   | 0.2698348   | 3.258218    | 0.03101627  | 0.5840266   | 0.01484392  |
| 0.4475165   | 0.1450443   | 2.007161    |             |             |             |

|             |             |             |             |             |                  |
|-------------|-------------|-------------|-------------|-------------|------------------|
| 0.05572866  | 0.01896958  | 1.50038     | 0.9856597   | 0.6664412   | 0.059951504      |
| 0.4006432   | 0.4839738   | 0.2270107   | 0.3840192   | 0.4200182   | 0.01125618       |
| 0.4346307   | 0.1951242   | 0.5303759   | 0.2368550   | 0.253193096 | 0.23628704       |
| 0.3780152   | 0.01832917  | 2.9610414   | 7.557730    | 1.1812206   | 1.29064 3.163202 |
| 1.1760366   | 2.003460    | 0.1425149   | 0.6854771   | 0.02852934  | 0.3487130        |
| 0.9973458   | 1.0166991   | 1.3838210   | 0.3522851   | 0.3899526   | 0.756629276      |
| 0.1239456   | 0.1317383   | 1.6719950   | 0.02695642  | 0.2616765   | 1.4342690        |
| 0.3205017   | 0.2664519   | 0.1052828   | 0.02938613  | 0.1036325   | 0.287912339      |
| 0.7766226   | 0.1535935   | 3.86575     | 0.2362635   | 1.5263290   | 0.843594719      |
| 1.9967      | 2.5003120   | 0.06816215  | 1.866556    | 0.1721088   | 0.4003775        |
| 1.175253741 | 2.7487940   | 0.4520524   | 0.3414826   | 1.1626521   | 1.460664971      |
| 0.06187247  | 0.4411351   | 1.7006751   | 1.146939398 | 0.168164086 | 0.4326056        |
| 0.1569503   | 0.3620184   | 0.3486876   | 0.1107667   | 0.442618    | 0.0334848        |
| 1.9955812   | 4.607980    | 0.08305208  | 5.1975130   | 0.0207677   | 0.070763493      |
| 1.1973847   | 7.7081881   | 1.8036740   | 0.2911764   | 0.9012859   | 2.0115130        |
| 0.03970678  | 1.3931460   | 0.04619299  | 0.1453518   | 0.07207057  | 0.0460843        |
| 0.08266387  | 0.1769882   | 4.5502220   | 0.5080909   | 0.7093352   | 0.7538479        |
| 0.07757808  | 0.3472394   | 1.6309910   | 0.3225276   | 0.07059308  | 0.05203712       |
| 0.9633732   | 1.0181430   | 0.05175994  | 0.06499132  | 0.4191348   | 0.08000871       |
| 0.04706101  | 0.05383701  | 0.2719014   | 1.3014340   | 0.3530621   | 1.8418           |
| 0.1989113   | 0.04090042  | 9.6230632   | 0.0392930   | 0.02292154  | 2.1622850        |
| 0.3207837   | 0.4317257   | 0.03957144  | 0.1236140   | 0.8928061   | 0.276935931      |
| 1.44737     | 0.4701733   | 0.1750210   | 0.1666587   | 0.6271975   | 6.818713104      |
| 2.109977894 | 1.3887970   | 0.168526697 | 0.06060584  | 0.01893838  | 1.2296263        |
| 0.8567222   | 1.176030    | 0.6526625   | 1.2545670   | 0.8439273   | 0.03836914       |
| 1.7152410   | 0.009156008 | 0.428975014 | 0.4052094   | 0.05811028  | 0.2112334        |
| 0.7819161   | 0.2174093   | 0.3964990   | 0.06534461  | 0.06944245  | 0.8594684        |
| 0.4155266   | FMR1-IT1    | 0.2158380   | 0.1774748   | 0.1997561   | 0.092265773      |
| 0.18234512  | 0.6028774   | 0.07057784  | 0.4740979   | 0           | 0.1500159        |
| 0.4102672   | 0.294189171 | 0.8769132   | 0.185652303 | 0.15846403  | 0.4179992        |
| 0.5427663   | 0.0829644   | 0           | 0.4183354   | 0.824760928 | 0.8232907        |
| 2.1284970   | 0.5168951   | 0.1172288   | 0.6703745   | 0.5487479   | 1.4808050        |
| 0.7248330   | 0.5994083   | 1.137171282 | 0.2532679   | 1.0798130   | 0.4367076        |
| 0           | 0.4112936   | 0.08648301  | 1.67056     | 0.4467161   | 0.1429740        |
| 0.1133746   | 0.8241577   | 1.4288830   | 0.7562181   | 1.3380010   | 0                |
| 0.5741575   | 0           | 0.3624207   | 0.6585427   | 0.4622520   | 0.400990563      |
| 0.06810684  | 0.4575893   | 0.6450869   | 0.1780747   | 0.7416520   | 0.28003          |
| 0.9992649   | 0.3152408   | 0.7742660   | 0.2240595   | 0.4799274   | 0.394205791      |
| 0           | 1.5615370   | 0.8231868   | 0.389308685 | 0.7300367   | 0.9153185        |
| 1.4855160   | 0.144978205 | 0.8809849   | 0.3716019   | 0.7232357   | 0.3692598        |
| 1.3969820   | 0.3289250   | 0.3296297   | 0.6412067   | 0           | 0.07331983       |
| 0           | 0.2867412   | 0.2531817   | 0.3795538   | 0.06665061  | 0.2057670        |
| 0.2147880   | 0.046943456 | 0.1470303   | 0.03881203  | 1.7800660   | 0.949225314      |
| 0.3429837   | 0           | 0.9905921   | 0.1918166   | 0.4882040   | 0.1613383        |
| 0.2361599   | 1.2566070   | 0.5403386   | 1.29904     | 0.332757718 | 6.5572590        |
| 0.115919303 | 0           | 1.3174120   | 0.3545438   | 0.4321621   | 0.5855043        |
| 0.2036912   | 0           | 1.3782691   | 1.197134    | 0.07376874  | 1.11665          |
| 0.9184390   | 0.8012472   | 0.4105435   | 0.9384412   | 0.3315526   |                  |

0.1212021 0.2820768 0.179617664 0.1271530.7039117 0.2420615  
0.6545343 0 0.3986373 0.1504672 0.5511987 0.8164716 0.5844499  
0.4905693 0.2711894 0 0.2481927 0.4369232 0.4562485 0.3046619  
3.8494760.4411226 0.2570662 0.1817580.4430740.2607607 0.3507553  
0.077073745 0.4897921 0.06795508 0.602685096 0.3076576 0.1244659  
0.5262247 0.3722417 0.4419095 0.3950868 0.236241842 0.2232301  
0.3651826 0.4538351.2377610.1916118 0.4108531 0.6959924 0.1212418  
0.3921893 0.318178643 1.0364320.07448365 0.1437722 0.2926480.7730164  
0.1105885 0.9146409 0.7853887 0.4392512 0.3240690.5021406  
0.3617506 0.1890608 0.2070182 0.3622923 0.6661354 0.1394914  
0.6748790.119956595 0.7682202 0.3858827 0.2947291 1.0397270.400533  
0.3526215 0.108821192 0.1243384 0 0.3022777 0.1850102 0.125818205  
0.3362023 0.1623311 0.6106397 0.6322226 0.9709263 2.468481  
0.1235863 0.3300540.6687278 0.09252181 0.5788547 0.5120468  
0.5918630.915424153 0.40286681 3.6995450.29976665 0.257538169 0.2454460  
0.4242331 0.2555179 0.5570883 0.151199575 2.4476580.8302060.3987308  
0.817371953 0.2057031 0.5329735 0.5261446 0.5952018 0.7018068  
0.1897038 0 1.5821460 0.5206613 0.5967766 0.188970861 0.8419973  
0.422393937 1.03508 0.4494846 0.3074616 0.3150721 0.6029796  
0.7462701 0.2363242 0.1224238 0.5459381 0.38834532 0.4691266  
0.3042192 0.5618150.7748725 0.1028825 0.2175608 0 0.5978953  
0.1677199 2.2607590.2085216 0.2545186 0.1074880.1239560.836840759  
0.3774890.7388949 0.1663598 0.4852070.6595737 0.5499231 0.367511  
0.3762959 0.4858429 0.4199370.610351931 0.531624689 0.45496 0.4477376  
0.2034313 0.7468208 0.4841795 0.2376426 0.6144472 0.06281573  
0.4971321 0.4973281.07206 0.3484517 1.2062521.5627430.9543683  
0.2697082 0.7893516 0.2880728 0.394446522 1.1951430.06351415  
0.2953510 0 0.2502554 0.4381952 0 1.3930610.9998382 0.5609561  
0.140037757 0.1317432 0.6029873 0.2124697 0.1109875 0.37451  
0.495890231 0.3109963 0.04460319 1.7771070.3108782 0.2702702  
0.4527899 0.056961563 0.3221311 1.0272140.2869816 0.4277230.515524426  
0 0 0.07848251 1.512279975 0.880252491 0.2219178 0.2083652  
0.4421620.3951465 0.2029323 0.1158439 0.8179533 0.3427541  
0.3174897 0.07245582 0.1597016 0.5435412 0.363002276 0.06607506  
6.6524840.2268506 0.7817884 0.2917348 0.6353849 1.2124270.1423238  
0.6582240.7048976 0.3697073 0.2814322 0.8221354 0.3474157  
0.3888211 0.1112579 0.8305406 0.1624826 2.51955 0.5272101  
0.4550391 0.4748249 0 0.06355709 0.2747031 0.3657467 1.501441  
0.2232537 0.2103793 0.7329078 1.56272 2.1244070.4655536 0.05394386  
0.5544294 0.3524081.1864822.18553 0.1598379 0 0.9598596 0.1146587  
0.09403171 0.8497828 0.2899906 1.5097970.5076259 0.461241821  
0.2965140 1.4460720.1850487 0.2288984 0.269231886 0 0.1972382  
0.075305537 0.3965505 0.4857502 1.0727441.6921780.5518027 0.1897974  
0.8512793 0.08402902 0.3514748 0.2116123 1.0064670.308200879 0

|                     |                    |                           |            |             |             |
|---------------------|--------------------|---------------------------|------------|-------------|-------------|
| 1.1976990.7036263   | 0                  | 1.3276971.0654070.1773569 | 1.0813990  | 1.005456    |             |
| AC025280.1          | 0.05694803         | 0.5853256                 | 0.1317622  | 2.069237384 | 0.481110586 |
| 0.5302230.6517592   | 0.7147937          | 0.7045269                 | 6.0855990  | 0.67918096  |             |
| 0.7519530.408197051 | 0.940727812        | 1.8381250                 | 0.1094492  | 0           | 0           |
| 0.1194885           | 0.1859738          | 0                         | 0.07369822 | 0.1206542   | 0.05919769  |
| 0.079005913         | 0.6469838          | 0.180022961               | 0          | 0.2998995   | 0.2880590   |
| 0.1964406           | 0                  | 0                         | 0          | 0.4097885   | 0           |
| 0                   | 0                  | 0                         | 0          | 0.2770681   | 0           |
| 0                   | 0.09542069         | 0                         | 0          | 0.4025055   | 0           |
| 0.7806394           | 0                  | 0.2403837                 | 0.1084820  | 0           | 0.09050776  |
| 0                   | 0                  | 0                         | 0          | 0.1131187   | 0           |
| 0.4966324           | 0                  | 0                         | 0          | 0.3761104   | 0.152924311 |
| 0.06747568          | 0                  | 0                         | 0.08957191 | 0.5571828   | 0           |
| 0                   | 0                  | 0.05158419                | 0.08747887 | 0           | 0.6512178   |
| 0.0638670.07849834  | 0.146691309        | 0.07512781                | 0.1985010  | 0.07180763  |             |
| 0.08566936          | 0.1294348          | 0.05962689                | 0          | 0.05457058  | 0           |
| 0.08313464          | 0                  | 0.1198904                 | 0          | 0           | 0.08117426  |
| 0.08184545          | 0                  | 0                         | 0.0981640  | 0           | 0.08426006  |
| 0.3233676           | 0.104937764        | 0                         | 0.09826113 | 0.0632229   | 0.1544281   |
| 0                   | 0                  | 0.07360437                | 0.5506530  | 0           | 0.6145035   |
| 0.1842654           | 0                  | 0                         | 0.2641978  | 0.06645559  | 0           |
| 0.497949742         | 0.1478428          | 0.3212282                 | 0          | 0           | 0           |
| 0                   | 0                  | 0.1251424                 | 0          | 0.08094997  | 0           |
| 0                   | 0                  | 0                         | 0          | 0.06138869  | 0           |
| 0.083098725         | 0.1388486          | 0                         | 0.2844812  | 0           | 0           |
| 0                   | 1.24419866         | 0.06876514                | 0          | 0.1357257   | 0           |
| 0.05531533          | 0                  | 0                         | 0.1418014  | 0           | 0.07315564  |
| 0                   | 0                  | 0.08080531                | 0.1241053  | 0           | 0.0923323   |
| 0.1476673           | 0.8051186          | 0.08210241                | 0          | 0.3135054   | 0           |
| 1.9674960.1640226   | 0                  | 0.05746103                | 0          | 0.0434149   | 0           |
| 0.817717981         | 0                  | 0.1675797                 | 0.0556623  | 0           | 0.2007784   |
| 0.2476899           | 0.2827337          | 0                         | 0.05692542 | 0           | 0.08689987  |
| 0.1464181           | 0                  | 0.054516138               | 0          | 0.05884189  | 0           |
| 0.0846958           | 0                  | 0.05642653                | 0          | 0           | 0.082946869 |
| 0                   | 0.3056496          | 0.08992243                | 0          | 0.2792281   | 0.09558595  |
| 0                   | 10.931710.09975609 | 0                         | 0          | 0.1524035   | 0           |
| 0.05708349          | 0                  | 0                         | 0.1289029  | 0           | 0.2556822   |
| 0.1392008           | 0                  | 0                         | 0.09059918 | 0.06892919  | 0           |
| 0                   | 0.5811343          | 0                         | 0          | 0.2811508   | 0.1080880   |
| 0.1488168           | 0.12169688         | 0                         | 0.07891477 | 0.08294358  | 0           |
| 0.149989831         | 0                  | 0.099345381               | 0          | 0           | 0.0496083   |
| 0.07018961          | 0.1108537          | 0                         | 0          | 0.06776468  | 0.2106150   |
| 0.1811936           | 0.06388718         | 0.05849366                | 0          | 0.09232306  | 0           |
| AC024267.6          | 0.04943736         | 0                         | 0          | 0.03835781  | 0.08082871  |

0.04295114 0.04698552 0 0.07532084 0 0 0 0 0.09501432 0  
0.1197738 0.052475051 0.2142880.1037296 0.08072318 0.06712766  
0.03198921 0.1309269 0.05139032 0.1245164 0.034293051 0.03120307  
0.078140184 0 0.3254335 0.04167799 0 0.06729011 0.1485660.2550927  
0 0 0.09738104 0.05899125 0.03557429 0.1443421 0.1665582  
0.03103098 0 0 0.06051983 0.1037649 0.06284924 0 0.065604466  
0.03899941 0.06550631 0.03693903 0 0.05308569 0.08017552 0.3337834  
0.2527189 0 0 0.03925951 0.045146106 0.08283599 0.3353134  
0.5438931 0 0.1140094 0 0.09113978 0.041508785 0.02293048  
0.08511482 0 0.08457836 0.2086803 0 0.1132517 0.06119474 0  
0.02099224 0 0 0.09665146 0.1552432 0 0 0.03074803 0.053761621  
0 0 0.07029677 0.060394042 0.1472998 0 0.05156672 0.07322547  
0.1270708 0 0.1352301 0.03597798 0.1406406 0.09702493 0.027220581  
5.55061 0.033188916 0 0.4881269 0.02928828 0.1522644 0.07423954 0  
0 0 0.06862831 0.06231853 0 0 0.03756553 0.2676398 0.07052576  
0.1119523 0 0 0.1211423 0.051426426 0.1213508 0.3742836  
0.05544381 0 0 0.03260973 0 0 0 0 0.2247282 0.05176291 0  
0.02368673 0 0.0373225 0 4.1825010 0.03680037 0.05203923  
0.0507427 0 0.1205099 0.088268095 0.05609306 0.03891251 0  
0.1057027 0 0 0.07105114 0 0 0 0.04260875 0.04182225  
0.08662515 0.2025052 0.0731473 0.1680451 0.08245653 0 0.05614396  
0 0 0 0.5214042 0 0.1229571 0 0.8183478 0.2698380.03144056  
0.0742275 0 0.1274745 0 0 0.0296366 0.04768039 0 0.3864499  
0 0.1599633 0.03156637 0.1265761 0.1880115 0.07645121 0  
0.031156652 0.03559938 0.03854164 0.02472723 0.1059407 0 0.0855629  
0.1859084 0 0.02585885 0.06540857 0.07439495 0.03538407 0.03779918  
0 0.05297993 0.2071653 0.05331069 0.1506281 0 0.051264447  
0.1086378 0.034330538 0 0 0.084920493 0.06940708 0.04877165  
0.4253340 0.3503951 0.05592864 0.08562061 0 0.05889497 0.06103837  
0.03347572 0.02130157 0.1004673 0.03620947 0.06992377 0.02664618  
0.05584814 0.08131135 0.04881812 0.072139127 0.06026817 0.069106187  
0.1234810.0935943 0.02515128 0.04510423 0.08631969 0.06104714  
0.09021614 0.03505122 0.1953848 0.031767814 0.1790878 0.08710115 0  
0.08874166 0 0.03114497 0.04012662 0.1521633 0.09603997 0.6263992  
0 0 0 0.4258790.179697233 0.02401757 0.0705178 0.0635074  
0.04630662 0.08393018 0.07872439 0.07014818 0.05386874 0 0.1202324  
0.069900071 0 0.1157865 0.0640960 0.1425484 0 0.03401978 0 0  
0.3914189 0 0.2192444 0.02494135 0.07674723 0 0.07537812 0  
0.07976459 0 0.129067643 0.1026546 0.03636954 0.07248179 0.04039926  
0 0 0.4014716 0 0.06136124 0.2642439 0.1235443 0.026729522 0  
0.05754721 0.1216646 0 0.03574205 0.094652392 0 0.02554072  
0.08250885 0.1780154 0.02579374 0 0 0 0.07352557 0 0  
0.026836375 0.05409107 0 0 0.091154034 0 0.03630709 0.04772572 0  
0.07542307 0.03873443 0.06633464 0 0 0.06060043 0.1244692

|             |             |             |             |             |             |             |
|-------------|-------------|-------------|-------------|-------------|-------------|-------------|
| 0.02286212  | 0.06224862  | 0.089084031 | 0           | 4.0098440   | 0.0432998   | 0.02633344  |
| 0.1670535   | 0.03307589  | 0           | 0.02716587  | 0.3230682   | 0.2690928   | 0.06048634  |
| 0           | 0.09910989  | 0.06631252  | 0.1335883   | 0.06370863  | 0.1398779   | 0.04652048  |
| 0.1479741   | 0.04025221  | 0           | 0.03021052  | 0           | 0           | 0.03932519  |
| 0           | 0.0602338   | 0.1398928   | 0.1234271   | 0.08689143  | 0.05331715  | 0           |
| 0.05291299  | 0.1008981   | 0           | 0.1072697   | 0.03050885  | 0           | 0.1030567   |
| 0.02692227  | 0.2620173   | 0.2490821   | 0.07204512  | 0           | 0           | 0           |
| 0           | 0.05242881  | 0.030833568 | 0.03255205  | 0           | 0           | 0           |
| 0.02430568  | 0.07245464  | 0.06093255  | 0           | 0           | 0           | 0.03201801  |
| 0.3048122   | 0.04029112  | 0           | 0.1048644   | 0.1109227   | 0.1015583   | 0.2549779   |
| 0.04007345  | 0.1644987   |             |             |             |             |             |
| AC010976.1  | 0.1477962   | 0.03314366  | 0.0901531   | 0.040205103 | 0.068106399 |             |
| 0.1667973   | 0.1449856   | 0.08010619  | 0.009498418 | 0.07937777  | 0.1174809   |             |
| 0.114458808 | 0.2756706   | 0.115569401 | 0.054254518 | 0.3469418   | 0.1013623   |             |
| 0.05164572  | 0.06863102  | 0.2213533   | 0.182548416 | 0.1677280   | 0.4567019   |             |
| 0.2310890   | 0.3648772   | 0.2017004   | 0.1622591   | 0.2122952   | 0.1398757   |             |
| 0.048464607 | 0.1322931   | 0.336957679 | 0.03468529  | 0.2193457   | 0.1676423   |             |
| 0.099443671 | 0.1207009   | 0.2853312   | 0.3535765   | 0.2224663   | 0.01780039  |             |
| 0.07763384  | 0.1988037   | 0.3828659   | 0.2039913   | 0.2426308   | 0.07084187  |             |
| 0.05119011  | 0.1787078   | 0.2434303   | 0.1015238   | 0.09565403  | 0.1294893   |             |
| 0.124809222 | 0.1823063   | 0.2100779   | 0.3975538   | 0.1413367   | 0.3376048   |             |
| 0.2222579   | 0.7153539   | 0.1255928   | 0.1796486   | 0.1766722   | 0.08109119  |             |
| 0.211039608 | 0.00450261  | 0.4951451   | 0.1300803   | 0.076743034 | 0.1032844   |             |
| 0.05697899  | 0.1618296   | 0.194036619 | 0.3440071   | 0.0601442   | 0.180087    |             |
| 0.3953693   | 0.3554131   | 0.03071359  | 0.2790665   | 0.1397039   | 0.01281235  |             |
| 0.06389869  | 0.00521907  | 0.09179881  | 0.09719085  | 0.2497754   | 0.01659612  |             |
| 0.1485854   | 0.1437345   | 0.16072383  | 0.07017074  | 0.0217446   | 0.1566623   |             |
| 0.164138074 | 0.3042502   | 0.0225217   | 0.1962062   | 0.2786156   | 0.1326149   |             |
| 0.2879103   | 0.2401173   | 0.1760048   | 0.1773552   | 0.08438175  | 0.180510493 |             |
| 8.6607770   | 0.08659235  | 0.04724546  | 0.3039176   | 0.07641529  | 0.1820818   |             |
| 0.1291310   | 0.08330951  | 0.05071948  | 0.02629175  | 0.1044495   | 0.1456568   |             |
| 0.1515405   | 0.1074276   | 0.1756035   | 0.2826420   | 0.1610061   | 0.3480763   |             |
| 0.09081291  | 0.05658665  | 0.09218691  | 0.139766013 | 0.08179176  | 0.1377163   |             |
| 0.06931482  | 0.06667373  | 0.041531478 | 0.1949778   | 0.1592331   | 0.08234969  |             |
| 0.2202448   | 0.09297691  | 0.1893366   | 0.1800711   | 0.2100905   | 0.1596511   |             |
| 0.1243368   | 0.1136067   | 0.04876802  | 2.72197     | 0.1608376   | 0.1280199   |             |
| 0.1640605   | 0.03861418  | 0.04869741  | 0.1397419   | 0.139138392 | 0.1646448   |             |
| 0.1395977   | 0.180765754 | 0.2757862   | 0.1782053   | 0.06142073  | 0.1737916   |             |
| 0.1237908   | 0.2049528   | 0.180150483 | 0.09727322  | 0.1682226   | 0.1600915   |             |
| 0.1926280   | 0.2067506   | 0.27768     | 0.2435211   | 0.007547356 | 0.07324189  | 0.168357502 |
| 0.3440978   | 0.1390992   | 0.3430789   | 0.08380036  | 0.1550553   | 0.1204732   |             |
| 0.4377017   | 0.1515615   | 0.1333      | 0.1976998   | 0.2014435   | 0.2459783   |             |
| 0.06669167  | 0.2104873   | 0.1256516   | 0.1244017   | 0.04775871  | 0.5041383   |             |
| 0.097075582 | 0.1304238   | 0.08922225  | 0.06880134  | 0.2486745   | 0.1496002   |             |



|                   |                     |                    |                    |                     |             |
|-------------------|---------------------|--------------------|--------------------|---------------------|-------------|
| 0.3010402         | 0.128709203         | 0.1199718          | 0.09636809         | 0.0994609           | 0.1266867   |
| 0.117483605       | 0.1651046           | 0.2324192          | 0.2829827          | 0.2248922           | 0.1777665   |
| 0.3261991         | 0.06923975          | 0.1068393          | 0.4394131          | 0.1727857           | 0.3513312   |
| 0.09562544        | 0.2742812           | 0.208947086        | 0.15047185         | 0.6259392           | 0.208998831 |
| 0.056111538       | 0.05729671          | 0.0969342          | 0.09054412         | 0.3181221           | 0.3063312   |
| 0.2682489         | 0.3754778           | 0.2097629          | 0.2544170.22387981 | 0.1600639           |             |
| 0.2720583         | 0.1746813           | 0.3010441          | 0.2129780.7675948  | 0.1824363           |             |
| 0.2722939         | 0.07892731          | 0.06776929         | 0.1406378          | 0.180374002         | 0.1375886   |
| 0.060101061       | 0.4322462           | 0.1424468          | 0.08476119         | 0.08826022          | 0.2486743   |
| 0.2422331         | 0.2549957           | 0.08001983         | 0.2718791          | 0.151955084         | 0.2238923   |
| 0.08522001        | 0.1398929           | 0.3312217          | 0.04162912         | 0.07787372          | 0.1526778   |
| 0.3101604         | 0.1252877           | 0.2587677          | 0.06922966         | 0.1505170.04014704  |             |
| 0.0385816         | 0.38744702          | 0.1958238          | 0.1609879          | 0.1795035           | 0.1258515   |
| 0.2372284         | 0.1198154           | 0.1105757          | 0.1141949          | 0.2419515           | 0.3006246   |
| 0.273561729       | 0.127647816         | 0.1195795          | 0.1463273          | 0.1139732           | 0.3874161   |
| 0.03875194        | 0.1035535           | 0.1147488          | 0.02737215         | 0.4603321           | 0.08513697  |
| 0.2240431         | 0.1301477           | 0.3337321          | 0.4340250.3216327  | 0.0461710.1098368   |             |
| 0.09324983        | 0.210466928         | 0.5021876          | 0.1186135          | 0.07091639          | 0.008783724 |
| 0.04737059        | 0.04673553          | 0.9329024          | 0.07597023         | 0.2401440.2489615   |             |
| 0.4647016         | 0.113326381         | 0.07380969         | 0.2502416          | 0.1366722           | 0.1070898   |
| 0.09713923        | 0.192933699         | 0.1524573          | 0.05553137         | 0.2451706           | 0.1306281   |
| 0.1289874         | 0.07328458          | 0.148927092        | 0.1136326          | 0.3397055           | 0.1321991   |
| 0.1038412         | 0.195467197         | 0.2587340.02261133 | 0.05374129         | 0.222963429         |             |
| 0.156560334       | 0.06907243          | 0.2412574          | 0.08257436         | 0.1352893           | 0.2189655   |
| 0.07211334        | 0.2673193           | 0.0853464          | 0.1383472          | 0.1353122           | 0.1540932   |
| 0.09473992        | 0.109757131         | 0.05758483         | 6.2045370.1741658  | 0.2376079           |             |
| 0.1416528         | 0.2588923           | 0.6188877          | 0.0502051          | 0.2165808           | 0.25353     |
| 0.3222023         | 0.1681851           | 0.07542065         | 0.1009250.5228127  | 0.07156719          |             |
| 0.1459808         | 0.0657450.5791131   | 0.1531556          | 0.1416320.1609272  | 0.02841509          |             |
| 0.1424325         | 0.04275098          | 0.1853958          | 0.1574153          | 0.06485568          | 0.2946646   |
| 0.3041590.2381684 | 0.3022749           | 0.2811149          | 0.02686424         | 0.1092927           |             |
| 0.1261410.3851221 | 0.3926020.1392998   | 0.05610376         | 0.1493792          | 0.09278822          |             |
| 0.1463379         | 0.4842326           | 0.1940595          | 0.3524458          | 0.1018220.189502583 |             |
| 0.07119565        | 0.05957993          | 0.5870779          | 0.0345581          | 0.06554552          | 0.134078457 |
| 0.130934862       | 0.05320538          | 0.084380469        | 0.1036789          | 0.5486068           | 0.5342302   |
| 0.4073103         | 0.08191146          | 0.1220880.1291693  | 0.03138507         | 0.1221603           |             |
| 0.1580755         | 0.2262470.118311475 | 0.05466052         | 0.4721961          | 0.1095026           |             |
| 0.02346719        | 0.2536492           | 0.2532298          | 0.1987298          | 0.5108217           | 0.06534663  |
| 0.2384385         |                     |                    |                    |                     |             |

|                     |                                                 |                     |                         |             |  |
|---------------------|-------------------------------------------------|---------------------|-------------------------|-------------|--|
| UBL7-AS1            | 1.5239430.2669906                               | 2.4942360.592227555 | 0.658361855             | 1.370518    |  |
| 0.8494105           | 0.9917240.8569684                               | 0.3987047           | 0.5925122               | 1.150692554 |  |
| 1.6534171.266126992 | 0.492674864                                     | 1.10395             | 1.8916281.4478021.95184 | 1.401326    |  |
| 0.753646064         | 2.3119541.1718261.0368132.2691312.3531711.80699 | 1.512138            |                         |             |  |
| 1.5120611.117171331 | 0.9290671.277355906                             | 0.8433081           | 2.92972                 | 1.722739    |  |

0.942440018 1.3199880.7632758 1.8318190.8960446 0.6309249 0.909649  
1.2605151.0093741.2640492.5671391.31526 1.7044411.7275091.6747711.041977  
1.6952022.0862161.263941013 0.8606554 2.6732512.3161640.9019066  
1.1994111.2216921.8039361.4669942.5837271.54304 1.1276891.154446644  
0.5368112 2.0946631.8036050.885013233 1.9835191.3157932.3731341.512182024  
1.6225390.9540824 0.6989742.2072231.2305021.8308722.15547 1.050367  
0.6330251.5809861.362177286 1.4461150.8294787 2.0773360.7353004  
4.0613352.3588060.725043055 2.5756391.7750032.3885691.18471214 1.685534  
0.7111852 3.5765590.4873562 1.22853 0.3883441 0.9631917 2.142478  
0.9656003 1.2235351.506555702 4.57491 1.081201706 0.6850592 2.518174  
2.2263031.4934383.9788482.0636461.5934370.9177767 2.6924771.364357  
1.1541571.2013641.7369781.8482571.8940221.7490361.4098930.9116738  
1.5983941.54922861 1.7258352.0473130.8448372 1.1577361.048285259 2.52447  
1.3732551.3930821.2992561.8496571.5940920.8975417 1.5113491.476916  
2.1784841.0981983.42219 2.0788560.2528071 1.5082341.0755082.292947  
0.8761025 1.0834851.700580345 2.4561211.8810441.472653503 1.407021  
2.9709491.6228721.4559871.6841660.9509809 0.758184346 1.7761371.992402  
2.3971862.19015 1.39645 1.77772 1.2612641.2646010.9243398 0.973282419  
0.9008672 3.09264 0.9612839 1.3383771.5763961.1756661.3186412.158257  
1.2885661.8200931.2198532.0317271.8834951.32879 0.5086923 1.252656  
2.1964181.68461 1.51587255 2.1432981.2384351.4631750.7354254 1.365794  
3.2434991.484295603 1.6834760.6345396 1.5417931.8740671.009488755  
0.8542031.4001292.6402332.06526 1.1570621.6678391.3634250.9599554  
2.0418580.5196371 1.53845 3.1186131.9258811.774994942 1.768818274  
0.8562375 1.443087169 1.511003548 1.9446931.085765611 2.2732441.178819  
1.4154171.379939276 1.7534390.5779456 1.4196331.62312862 1.34098  
2.1167463.2247290.6790217 1.4253141.4459651.9105142.2494830.5086427  
2.2691251.5903571.08660087 2.4489321.404027565 1.5744621.7458211.136529  
1.1691752.0561250.8660661 1.09027 1.00681 2.0395661.70258764 2.049282  
1.4492661.5354221.8029611.1453351.3310012.2630241.1593110.9167464  
3.5400222.2586180.8551303 0.3449672 2.0388231.300895876 1.859311  
1.6303221.2569081.2652271.8375062.7438672.4080933.0569092.9653461.431961  
0.954933074 1.85851017 1.8150211.2348791.5642 1.8849951.2764221.418108  
1.2324880.8819916 5.4595131.4215292.07359 1.4240931.2456241.3744121.50505  
1.0819871.2759691.3983491.254616743 1.4143921.2485171.9465530.9198511  
0.8242483 1.0917943.2169671.1863041.9774821.75869 1.6098911.301477609  
1.1230921.3707681.3779890.6790033 0.7136495 0.936657381 0.9357171  
0.8409918 2.6204680.8418256 1.4546912.1797470.594132421 0.9369118  
1.5195711.38154 1.6558381.522893687 0.4926399 0.7103726 0.8658319  
1.708285238 1.185509642 1.3481181.4878980.7602084 0.7001333 1.424679  
1.06888 2.0645350.6531371 1.3373560.5813414 1.1371971.3846311.52906748  
0.8614874 9.41094 0.6370389 2.5090381.6970091.0659331.6537220.9706319  
2.6405941.0840031.0488010.7564436 0.8939741 3.8327471.8250041.093516  
2.3029151.5318021.7234870.7261522 0.9279516 2.3069890.5493584

0.9051497 1.8596671.1109291.7118920.9553344 1.0549721.2152841.902365  
1.7349321.2139791.70961 0.6394582 0.6892049 0.9859594 3.118789  
0.6732822 1.1668451.5883991.2074361.9427172.2027840.2035871.009474  
1.6404661.794851067 0.9261294 1.52384 3.8212250.1484718 1.175386  
1.080076456 1.345522814 0.8835732 0.860993303 1.8612831.5032692.366936  
2.00638 0.8854658 1.5355091.0885550.7584725 1.3512590.6260815  
2.1421920.906699349 1.1848632.1087751.0020710.6238362 1.3591291.078236  
0.9516338 1.8628930.9264701 1.478981  
Z98885.30.06741713 0.06929296 0.009749055 0.018012043 0.071194509 0.06538511  
0.02755629 0 0.01489365 0.007321495 0.0480552 0.028715676 0.1198332  
0.04832384 0.015467605 0.06800119 0.05297918 0.01619624 0 0.1306673  
0.035779801 0.1022777 0.1149320.1742953 0.03432795 0.2181165  
0.03570869 0.2102411 0.1981018 0 0.06382689 0.071039226 0.009888547  
0.1331369 0.07104473 0.027516888 0.09176272 0.05064941 0.1956751  
0.1453459 0 0.02213289 0.04022283 0.2183051 0.06561255 0.1249234  
0.03173744 0.04013339 0.07759836 0.04126508 0.07075145 0.04999561  
0.01504007 0.08946403 0.05318303 0.08933018 0.1259333 0.07821806  
0.01809808 0.0410004 0.1950756 0.06154103 0.05496419 0.07290115  
0.02676886 0.369391243 0 0.1905262 0.09889341 0.03800025 0.1036488  
0.1191251 0.1035719 0.14151259 0.1016276 0.08705255 0.1155186  
0.2450943 0.1304302 0.03210622 0.14157 0 0.02678659 0.150291  
0.016367146 0.007996766 0.1070895 0.3175550 0.04016965 0.08386145  
0.073314083 0.1052448 0.1515370.1437943 0.061768978 0.1506532 0  
0.07032092 0.02496418 0.1472922 0.05249387 0.1844117 0.07359412  
0.01917899 0.01102598 0.074240766 5.5934910.045259329 0 0.2571840  
0.1557309 0.2024791 0.03265761 0.02650961 0 0.08188916 0.07436016  
0.1008075 0.07926962 0.1024553 0.06517449 0.2324232 0.1984685  
0.01294508 0.01183049 0.05506679 0.052597204 0.03309693 0.1276015  
0.07560806 0 0.021707308 0.1334085 0.1028093 0 0.1275127  
0.06338655 0.0574611 0.03529423 0.03064417 0.0888286 0.04874044  
0.06362031 0.05097928 3.7574570.07381334 0.05018423 0.05322396  
0.06919722 0 0.01369483 0.090277613 0.07649343 0.1061291 0.021391937  
0.1081092 0.09719246 0.02568228 0.03633435 0.0143782 0.051419  
0.092237851 0.05810504 0.02851625 0.05906485 0.08629809 0.0997501  
0.04583221 0.1311858 0.01183436 0.02871107 0.062114556 0.1011656  
0.02908127 0.03742278 0.0114261 0.2179776 0 0.2566734 0.107326  
0.06431267 0 0.02178388 0.04345886 0.01230276 0.06735651 0.04041508  
0.03251059 0.01361569 0.1903045 0.070253464 0.1363375 0.09685502  
0.02876838 0.2136575 0.1042556 0.1573450.053109944 0.01213661  
0.03941908 0.03372023 0.03611753 0.02456212 0.02917028 0.07922533  
0.06622697 0.05289512 0.1895434 0.2705374 0.03618962 0.01288657  
0.1450538 0.01806203 0.1977562 0.05452436 0.07702865 0.079425911  
0.034954358 0.2222222 0.03511211 0.025138188 0.02395787 0.014475633  
0.0118312 0.08313665 0.06344 0.162343766 0.1023921 0.1144038

|             |             |             |             |             |             |             |
|-------------|-------------|-------------|-------------|-------------|-------------|-------------|
| 0.04864992  | 0.191479963 | 0.08031438  | 0           | 0.04565044  | 0.1307191   | 0.01712576  |
| 0.08641224  | 0.09535422  | 0.1726011   | 0.03807972  | 0.01848055  | 0.02496476  |             |
| 0.049187635 | 0.06164024  | 0.023559821 | 0.1431311   | 0.06381671  | 0.1543433   |             |
| 0.09226215  | 0.02942829  | 0.1144677   | 0.1230267   | 0.01194973  | 0.06661097  |             |
| 0.064982085 | 0.1933408   | 0.1336261   | 0.06854814  | 0.07059263  | 0           | 0.05309003  |
| 0.0273601   | 0.03890686  | 0.05729875  | 0.4982910   | 0.01356913  | 0.03726517  | 0           |
| 0.01209929  | 0.112315032 | 0.09006931  | 0.02404107  | 0.03247661  | 0.03946737  |             |
| 0.4005910   | 0           | 0.0459126   | 0.2167905   | 0.08197973  | 0.178728554 | 0.059304746 |
| 0.1480282   | 0.04370347  | 0.02647579  | 0.2551390   | 0.06751507  | 0.01159809  |             |
| 0.01893976  | 0           | 0.2790179   | 0           | 0.1943376   | 0.05952138  | 0.08721607  |
| 0.1408049   | 0.2762542   | 0           | 0.1903545   | 0.03374239  | 0.055002503 | 0.174986    |
| 0.02479835  | 0.09060567  | 0           | 0           | 0.04885463  | 0.3592851   | 0.03665304  |
| 0.1882746   | 0.09008656  | 0.2105949   | 0.027338048 | 0.0257188   | 0.07847644  |             |
| 0.02765211  | 0.01083344  | 0.0243705   | 0.088739985 | 0.06071243  | 0.06095176  |             |
| 0.1781509   | 0.01517234  | 0.01758731  | 0.05303595  | 0.055599932 | 0.06288616  |             |
| 0.3007978   | 0.04481944  | 0.05009983  | 0.064043781 | 0.03688167  | 0.01772744  |             |
| 0.03064257  | 0.108767463 | 0.08592106  | 0.1114010   | 0.08135375  | 0.01233121  |             |
| 0.1414236   | 0.0660271   | 0           | 0.1596801   | 0.01115203  | 0.1342901   | 0.01414476  |
| 0.03897101  | 0.03183289  | 0.040494278 | 0.01289911  | 2.8935770   | 0.05904743  |             |
| 0.06284355  | 0.1366853   | 0.09021039  | 0.2721922   | 0           | 0.01835684  | 0.2140592   |
| 0.02062113  | 0.02197638  | 0.3547818   | 0.1356444   | 0.03036213  | 0           | 0.06676246  |
| 0           | 0.1135072   | 0.2470116   | 0.07402695  | 0.0308983   | 0.01485175  | 0.01240756  |
| 0.02681365  | 0           | 0.1234147   | 0.0290556   | 0.04107005  | 0.09538508  | 0.1157173   |
| 0.3851016   | 0.06361947  | 0           | 0.04509801  | 0.05159758  | 0.0496337   | 0.0121902   |
| 0.04160456  | 0.01599481  | 0.09369147  | 0.06715071  | 0.01835679  | 0.1148496   |             |
| 0.09907049  | 0.1350897   | 0.04404368  | 0.054025934 | 0.04134658  | 0           | 0.0736437   |
| 0.01806253  | 0.008937068 | 0.021023685 | 0.011097711 | 0.01283489  | 0.073505404 | 0           |
| 0.09482773  | 1.0471      | 0.7561243   | 0.05800439  | 0.03705207  | 0.03115987  |             |
| 0.01640407  | 0.005717883 | 0.04131076  | 0.1746503   | 0.040111137 | 0           | 0.2857723   |
| 0.09615291  | 0.03679688  | 0.1787530   | 0.1796259   | 0.06924691  | 0.2111098   |             |
| 0.01366192  | 0.09346869  |             |             |             |             |             |
| AC026356.1  | 0.3382470   | 0.1121479   | 0.5806471   | 0.90953518  | 0.345676361 | 0.7449952   |
| 0.6243824   | 0.7532461   | 0.5592307   | 0.4360633   | 0.2281412   | 0.855143097 |             |
| 0.6206245   | 0.500545241 | 0.280377404 | 0.5634928   | 0.5144680   | 0.3564963   |             |
| 0.5209941   | 0.1797578   | 0.833877666 | 0.1324259   | 1.0416720   | 0.2494269   |             |
| 1.3778480   | 0.8895923   | 0.5316964   | 0.9527470   | 0.2198535   | 0.726598227 | 0.9641451   |
| 0.091979307 | 0.2816742   | 0.5889699   | 0.3679457   | 0.237519887 | 0.4009886   |             |
| 1.5301820   | 0.4504068   | 1.3926      | 0.5240096   | 1.3038920   | 0.7811885   | 0.8165571   |
| 0.9344832   | 0.5440573   | 1.0821050   | 0.5542766   | 1.2168260   | 0.4541440   | 0.3969624   |
| 0.3883962   | 0.1947340   | 0.796366666 | 0.5508774   | 0.5493937   | 0.7500501   |             |
| 0.5963927   | 1.1013421   | 0.0440250   | 0.2525776   | 0.6055782   | 0.4625782   | 0.3964383   |
| 0.4159135   | 0.757270196 | 0.3839329   | 0.4933745   | 0.4161431   | 0.754853604 |             |
| 0.2851775   | 0.1156795   | 1.3007851   | 0.39251726  | 0.2935337   | 0.7326335   |             |
| 1.2962720   | 0.1120024   | 0.5373352   | 0.1454954   | 1.0998020   | 0.3511595   | 0.7109895   |

0.7969006 0.635749654 0.8179625 0.7892728 0.9319627 0.3200899  
1.3938780.0678632 0.996709553 0.4211908 1.5696420.4033905 0.613153075  
0.6718765 1.18882 1.2291650.5171650.7852735 0.3534303 0.2188728  
0.5558426 0.4469820.8851171 1.658148627 1.7294980.571353173 1.151021  
0.6855751 0.2973505 0.2912511 0.8083374 0.4016983 1.115523  
0.2846819 0.1817613 1.1966120.1678144 0.7184503 0.4145496  
0.8776127 0.9131795 0.6918439 0.3855001 0.6586625 0.3386689  
0.771813263 0.3106831 0.7116926 0.6607905 0.7520107 0.843177751  
1.6697532.2629411.8111982.2976321.1161640.4215931 0.5026762 1.031604  
0.6064291 0.1893227 0.8731595 0.01100106 11.401650.07964262  
0.2274192 0.8269521 0.3471781.0216171.5603830.545479915 0.321884  
0.1717656 3.863814272 1.4464212.23369 0.04987889 1.1290691.154219  
1.0652111.030054474 0.6770929 1.3107281.4721490.4245968 0.5650453  
1.1571710.3761079 0.8274283 1.25153 0.743921363 0.4147891 0.4518419  
0.6056726 0.5621774 0.0651301 1.5933050.2745355 0.2382211  
0.8743348 1.9003771.4525610.4782876 0.3982304 0.4534974 0.8895784  
0.6734987 1.4279620.1705847 0.45480964 0.8296695 1.1425770.5587257  
0.4564509 0.3880871 1.5024740.123777089 3.2056750.1531157 0.8186225  
0.6546935 1.081276275 1.1047360.5334077 0.4973416 1.32408 0.3175955  
0.3064977 0.4217145 0.7258027 1.1456472.4087720.6035424 0.9177531  
0.6150277 1.311186007 3.009642351 0.2637489 0.666776459 1.139184127  
0.3101989 1.986713992 0.5974277 0.9041983 0.8566036 1.834450845  
0.3756262 1.62939 0.6047074 1.012348593 0.8839020.4580351 1.773202  
0.8180461 1.2195640.9909708 0.7716348 0.3999087 1.2079580.5144526  
0.4202064 0.748317183 0.5054621 1.082909732 1.8968211.1051471.054704  
0.7764774 0.4381822 0.4446274 0.1194682 0.6188851 0.08624574  
0.729184875 0.4743122 0.07689549 0.9230409 0.3917189 0.3770714  
1.2922980.7616369 0.8563811 0.7842792 0.2765019 3.5137750.5629137  
0.7607327 0.9869441.123714643 2.3853860.4669141 0.4485298 0.429249  
1.3337290.3822513 0.7276646 0.4517908 0.94734 0.4776513 0.478251443  
0.518304689 0.4344341 1.1883030.73702 0.8337297 0.5070148 0.8259262  
1.5939691.5877521.0523761.8855950.4258221.0348910.7227173 0.9115484  
1.43074 2.0622140.6689763 0.7135798 0.56972379 0.4380281 0.4174055  
0.9705011 0.1961612 0.5578001 0.6009264 0.2436714 0.8305005  
0.2979434 0.6026461 0.5344362 1.321466585 0.8158469 1.320914  
2.9537521.0520091.4199361.044524375 0.6386941 1.66856 0.3763465  
1.5715730.1252431 0.4349052 2.217261377 1.3434790.3732357 0.8704616  
0.7351666 1.492592929 0.5491618 1.9280450.6943128 0.42248585  
1.573362135 1.7308610.5266711 1.1814880.3495751 0.5471345 1.317649  
0.3101231 1.0251891.6183711.1537940.7669678 0.4533782 0.445660863  
0.6513535.7525161.20413 0.6393185 0.4719353 0.7884102 1.057277  
0.8393995 1.2834640.2771570.4672425 0.04268146 0.7437259 0.6439693  
0.4717429 0.6936745 0.3704652 0.5133708 0.8817926 1.545809  
0.5367472 0.2533721 0.7114940.2570386 1.8921011.0829550.3395609

|             |             |             |             |             |             |             |             |            |           |   |  |
|-------------|-------------|-------------|-------------|-------------|-------------|-------------|-------------|------------|-----------|---|--|
| 0.7147848   | 1.80799     | 1.4079180   | 0.8853417   | 0.55615     | 0.5883746   | 0.3545109   |             |            |           |   |  |
| 0.2802790   | 0.7794138   | 1.4138110   | 0.4892881   | 0.4813770   | 0.8283828   | 0.6520343   |             |            |           |   |  |
| 1.4780580   | 0.4753556   | 0.9583118   | 0.6230417   | 0.3021170   | 0.7698556   | 1.6088740   | 13          |            |           |   |  |
| 0.7601859   | 0.2268      | 0.8581635   | 0.04677356  | 0.3124286   | 1.483533166 |             |             |            |           |   |  |
| 1.681168264 | 1.7282930   | 0.361655256 | 1.1827550   | 0.4384996   | 0.8134512   | 0.09108     |             |            |           |   |  |
| 0.7402933   | 1.5991281   | 0.1431030   | 0.7009023   | 0.6959131   | 1.8854470   | 0.4946629   |             |            |           |   |  |
| 1.272397978 | 0.5447743   | 0.4204645   | 0.4979828   | 1.2625510   | 0.5207481   |             |             |            |           |   |  |
| 0.5753142   | 1.17677     | 0.6592274   | 0.2653353   | 0.7382236   |             |             |             |            |           |   |  |
| AL121906.1  | 0           | 0           | 0           | 0           | 0           | 0           | 0.2750932   | 0.05279726 | 0.1784191 | 0 |  |
| 0.06396438  | 0.114666915 | 0           | 0.04824147  | 0.061764957 | 0           | 0           | 0.2586981   | 0          |           |   |  |
| 0.0652223   | 0.071437626 | 0.1166896   | 0.1059102   | 0           | 0.1370777   | 0.4790384   |             |            |           |   |  |
| 0.1425913   | 3.7079280   | 0.1130081   | 0           | 0.04247873  | 0.709181363 | 0           | 0.2215167   |            |           |   |  |
| 0.0567389   | 0.109879938 | 0.5496379   | 0.06741744  | 0.2604554   | 0.1160785   |             |             |            |           |   |  |
| 0.1114547   | 0           | 0           | 0.3390068   | 0.06550071  | 0.4081432   | 0.04224445  | 0.10684     |            |           |   |  |
| 0.1032881   | 0.08238949  | 0.09417447  | 0.3707629   | 0.06005774  | 0.044655767 | 0           |             |            |           |   |  |
| 0.04458895  | 0.2011498   | 0.03470433  | 0           | 0.05457402  | 0.06491436  | 0.1474467   |             |            |           |   |  |
| 0           | 0.1164430   | 0.2672323   | 0.061460267 | 0.3383097   | 0.2282418   | 0           | 0.050580636 |            |           |   |  |
| 0.05173607  | 0           | 0.2481488   | 0           | 0.2809504   | 0           | 0           | 0.1151419   | 0.3314381  |           |   |  |
| 0           | 0.1541768   | 0           | 0           | 0.02857807  | 0           | 0.2554603   | 0.1315778   | 0          | 0         |   |  |
| 0.06416189  | 0.1255778   | 0.109783674 | 0.2674393   | 0           | 5.7898180   | 0.1336857   |             |            |           |   |  |
| 0           | 0.07020105  | 0.04984325  | 0.03459792  | 0.2096176   | 0.2454632   | 0.1469374   |             |            |           |   |  |
| 0.03829259  | 0.2641724   | 0.185285547 | 1.7779760   | 0.135546548 | 0.07395525  |             |             |            |           |   |  |
| 0.1208215   | 0           | 0.06909576  | 0.2021340   | 0           | 0.2194962   | 0.04671404  |             |            |           |   |  |
| 0.08483818  | 0.1150122   | 0.3956725   | 0.05114035  | 0.05205072  | 0.4480523   |             |             |            |           |   |  |
| 0.3352972   | 0           | 0           | 0           | 0.070010067 | 0           | 0.07839017  | 0           | 0.7421662  | 0         |   |  |
| 0.0443937   | 0           | 0           | 0.1272953   | 0.0506228   | 0.07648421  | 0.03523407  |             |            |           |   |  |
| 0.06118386  | 0           | 0.1459721   | 0.1016190   | 0.03392826  | 0.6155573   | 0.04912502  | 0           |            |           |   |  |
| 0           | 0.03453963  | 0.2540935   | 0.9296609   | 0.060082487 | 0.07636305  | 0           |             |            |           |   |  |
| 0.128132844 | 0.2398331   | 0           | 0.1025540   | 0.09672644  | 0.2870738   | 0           | 0.092080627 |            |           |   |  |
| 0           | 0.1138706   | 0           | 0.1378416   | 0.09958007  | 0.09150818  | 0           | 0           | 0          |           |   |  |
| 0.124017357 | 0           | 0.05806339  | 0.2241539   | 0.1825059   | 0.03347786  | 0.04310438  |             |            |           |   |  |
| 0.08912552  | 0           | 0           | 0.05052531  | 0.1304805   | 0.1518467   | 0           | 0.1075867   | 0          |           |   |  |
| 0           | 0.1631098   | 1.2860190   | 0.093511618 | 0.3266523   | 2.1056920   | 0           | 0.2081558   |            |           |   |  |
| 0.03926921  | 0.042415533 | 0.0969274   | 0.2098767   | 0.1009882   | 0           | 0           | 0           |            |           |   |  |
| 0.1265445   | 0.05289127  | 0.1760165   | 0.1335673   | 0.2363167   | 0           | 0.1286461   |             |            |           |   |  |
| 0.1158453   | 0           | 0.2820272   | 0.07257523  | 0.1537947   | 0.079290526 | 0           |             |            |           |   |  |
| 0.1478956   | 0.046736346 | 0           | 0           | 0.346823013 | 0.04724414  | 0.1327919   |             |            |           |   |  |
| 0.6876031   | 0           | 0.13629     | 0.07613922  | 0.0388536   | 0.509742872 | 0           | 0.1661908   |            |           |   |  |
| 0.09114525  | 0.2029942   | 0.6154766   | 0.04929426  | 0           | 0.3627514   | 0           |             |            |           |   |  |
| 0.1106943   | 0.06645921  | 0.049103792 | 0.1640938   | 0.09407865  | 0.4370665   |             |             |            |           |   |  |
| 0.3503936   | 0           | 0           | 0.1762687   | 0.1246610   | 0.06140849  | 0.0954349   | 0.3191877   |            |           |   |  |
| 0.086495094 | 0           | 0.05928817  | 0.1094901   | 0.4026989   | 0           | 0           | 0           | 0.6732361  |           |   |  |
| 0           | 1.19386     | 0.3792881   | 0           | 0           | 0.09662937  | 0.040772213 | 0.0653933   | 0          |           |   |  |
| 0.2161417   | 0           | 0.2285190   | 0.1432458   | 0.03666747  | 0.2164209   | 0.49104     | 0           |            |           |   |  |

|                                   |                           |                                   |                     |                             |                     |            |
|-----------------------------------|---------------------------|-----------------------------------|---------------------|-----------------------------|---------------------|------------|
| 0.059203659                       | 0.4334758                 | 0                                 | 0.1057226           | 0.1940602                   | 0.10784             | 0.1389399  |
| 0.1764698                         | 0.04896771                | 0.2422107                         | 0                   | 0                           | 0                   | 0.1393079  |
| 0.1539256                         | 0                         | 0.1085886                         | 0.04491316          | 0.395342991                 | 0.1397502           | 0.1485365  |
| 0.03289136                        | 0.05499809                | 0                                 | 0                   | 0.3415930.1463622           | 0.2506049           | 0.05995533 |
| 0.2691020.072777198               | 0.05134992                | 0.5483987                         | 0.2208398           | 0                           | 0.04865792          |            |
| 0.161070406                       | 0                         | 0.03477021                        | 0.3369736           | 0.06058593                  | 0.03511466          | 0.4941585  |
| 0                                 | 0.1255579                 | 0.1501426                         | 0                   | 0.0666859                   | 0.073068131         | 0          |
| 0.062046894                       | 0.343098414               | 0.04942715                        | 0                   | 0                           | 0                   | 0.1062720  |
| 0.08249922                        | 0.2259304                 | 0                                 | 0.1694860           | 0                           | 2.2745230.1768403   | 0.03584939 |
| 0                                 | 0.09005662                | 0.09451417                        | 0                   | 0                           | 0.06105552          | 0.04117195 |
| 0.1805509                         | 0.1818623                 | 0.02891021                        | 0.5331893           | 0.06333128                  | 0                   | 0.2465905  |
| 0.05912061                        | 0                         | 0                                 | 0.1070718           | 0.04073089                  | 0.2464087           | 0          |
| 0                                 | 0.08401459                | 0.1774362                         | 0.2177521           | 0                           | 0.1080507           | 0          |
| 0.7788432                         | 0.08306729                | 0                                 | 0.5144247           | 0                           | 0.03665099          | 0.05095726 |
| 0.1130304                         | 0                         | 0.4836546                         | 0.503382551         | 0.09906264                  | 0.04663145          | 0.2940727  |
| 0.1442539                         | 0                         | 0.041975699                       | 0                   | 0                           | 0.1236517           | 0          |
| 0.2977998                         | 0.2959113                 | 0                                 | 0.06550444          | 0                           | 0.04124035          | 0          |
| 0.1244543                         | 0.1556101                 | 0                                 | 0.07346832          | 0.03568966                  | 0.2265091           | 0.1382578  |
| 0.1487647                         | 0                         | 0.1119712                         |                     |                             |                     |            |
| LINC-PINT                         | 0.9411876                 | 0.8494027                         | 0.7777327           | 1.303736824                 | 0.761891626         |            |
| 2.6360441.9999242.0066470.4115035 |                           |                                   | 1.8177510.7667226   |                             | 1.044827663         |            |
| 1.3290332.378844031               | 1.089470919               | 4.5197911.4173981.9349360.9868604 |                     |                             |                     |            |
| 0.3909004                         | 0.918958429               | 0.7164196                         | 0.6743226           | 0.3105742                   | 1.282428            |            |
| 0.8530385                         | 1.0630391.4181220.4845705 |                                   | 0.696091964         | 1.6393120.867353153         |                     |            |
| 0.6195443                         | 0.6130835                 | 0.6192897                         | 0.27484181          | 0.8882667                   | 0.9066638           |            |
| 1.0237461.2443410.8526347         |                           | 2.2781270.6261043                 |                     | 1.1987791.34048             | 0.6938485           |            |
| 0.3828667                         | 0.7704782                 | 0.3959187                         | 2.2963220.2202619   |                             | 0.6892861           |            |
| 0.6672195                         | 0.892126291               | 1.56255                           | 0.5562015           | 1.1810590.4295189           | 1.729012            |            |
| 0.7392574                         | 0.9552404                 | 0.7950910.3636158                 |                     | 1.66244                     | 1.6979761.695023785 |            |
| 0.3956313                         | 0.9156631                 | 0.7263875                         | 1.261883241         | 0.7613166                   | 0.06953583          |            |
| 0.3063158                         | 2.924176675               | 1.2716231.5921841.2886750.3254066 |                     |                             | 0.3045393           |            |
| 0.9807829                         | 0.8113490.8930502         | 0.4065332                         | 0.2924267           | 0.235661531                 |                     |            |
| 0.6348316                         | 1.67656                   | 0.5890440.8911548                 |                     | 1.1942781.3461710.952187967 |                     |            |
| 0.6515686                         | 0.6014961                 | 0.6062026                         | 1.177824278         | 1.0552730.4672442           |                     |            |
| 2.2097391.1851980.6271305         |                           | 2.8231280.9090020.4152648         |                     | 0.4440753                   |                     |            |
| 0.5105968                         | 1.859831895               | 14.9986                           | 0.84540217          | 0.9225160.4592019           | 0.5634182           |            |
| 0.7272271                         | 1.1589320.6672026         | 0.3713812                         | 0.2566866           | 0.4188227                   |                     |            |
| 0.6944893                         | 1.1208270.6092393         | 0.7226477                         | 0.5275395           | 0.1840126                   |                     |            |
| 0.3624032                         | 0.5591672                 | 0.2301901                         | 1.3232460.859658493 | 0.3091099                   |                     |            |
| 0.5653121                         | 0.5700643                 | 0.5243655                         | 3.454962075         | 1.5661190.7601511           |                     |            |
| 1.0133511.1743690.8485346         |                           | 1.8708560.3055961                 |                     | 1.0971090.4399488           | 1.10484             |            |
| 1.0843860.6678944                 |                           | 20.853280.4978872                 | 0.2245842           | 2.4302030.3837227           |                     |            |
| 1.3272520.9113112                 |                           | 0.40986503                        | 0.1637197           | 1.2183451.356912153         | 1.795003            |            |
| 0.5389661                         | 0.7295758                 | 0.6127079                         | 0.7385712           | 3.2115350.883892444         |                     |            |

0.1921971 0.5714966 1.2067091.0444211.2518641.4134622.1368330.1473699  
1.23646 1.553032423 1.1482430.3168731 1.7730420.3512683 2.410999  
1.3106020.5906170.8949778 0.8968044 1.7922781.0893121.1796050.8521902  
0.6552901 0.7077338 0.1960968 1.31403 2.5008310.829281329 1.856938  
0.1507635 0.3862323 0.4905511.5924031.5766832.323037196 1.738038  
0.2761169 0.5150438 0.4357062 1.892539882 1.1408290.6474367  
1.5360140.3087599 0.6508261 0.4342754 0.5492407 0.4488223  
0.1693419 2.1297230.6486314 1.4003881.30893 1.406331197 1.047384307  
1.7367491.298059306 0.743466777 0.5360806 0.974535539 0.8885874  
1.3911531.56942 2.222633747 0.5976838 2.5561870.7799978 0.788605529  
0.5078795 0.9879428 5.0807170.7997736 0.8663778 0.6869534  
0.7421367 0.8307529 2.0671981.5282271.0686461.373383577 1.695091  
0.788468682 1.8053060.7543358 0.6373274 1.28056 0.2977504 0.7491626  
0.9335722 1.6368722.9135743.565551916 1.6908760.4680023 0.8882882  
0.6475291 0.8519306 0.7313583 2.2039510.6813225 0.9301306  
0.9917039 0.1372902 0.9571083 0.9962217 0.8098461 1.088703879  
0.5608036 0.5332645 0.7709292 0.9215171 1.09679 0.5169917  
0.9353013 0.2894416 0.9701793 0.9889679 1.446676019 0.525030894  
0.6490136 0.3996666 1.7772641.5649470.6936153 0.7627591.098183  
2.2428624.73027 0.6611764 2.0419010.5757557 0.3088531 1.954314  
1.2525410.9630045 0.6807933 0.8184839 1.331333454 1.1984780.9312455  
1.2693220.3376627 1.7227371.7253073.52866 0.3423223 1.00945 0.8705807  
0.5015489 0.361709927 1.6313691.3437110.7693931.2520941.3561711.274578844  
0.6201846 0.4913266 0.4524494 2.1137310.6228088 0.2958227  
3.587342103 0.7953393 1.9265252.3633051.13078 1.135752263 0.3731625  
0.5863797 1.4845971.717249134 1.146375337 1.0380250.3957324 0.9501342  
0.3702329 1.5262391.13527 0.4971127 2.1264930.9527153 2.8457731.08888  
0.3138213 0.673664688 1.18463921.9797 1.4591120.7965472 1.351931  
1.7289281.6717391.4380220.5571942 0.5057534 1.8737570.6071954  
0.1610728 0.3958924 2.1681150.4282424 0.6420878 0.8208520.9030517  
1.9999111.4576540.4729436 0.8958253 0.4731801 1.5599510.6390645  
0.7444107 0.8593249 1.73408 0.8240384 0.4093734 0.1383335  
0.8558968 0.4835711 0.7441102 2.0346781.2554630.5075851.060465  
0.7033502 0.5149944 1.3980361.0036612.1452840.1817499 0.9844889  
0.8655436 1.555779389 1.38695 0.6498452 1.0890131.3214490.9146708  
1.300828295 1.502888143 1.54335 3.340997268 0.5663602 0.2688571  
4.2377530.9884303 0.3901775 1.3697781.3580870.5553732 0.8321869  
1.0288620.4545139 0.971668972 0.9824036 0.9199894 2.2610951.775606  
0.5982266 1.7548811.1621 0.8360256 0.7921585 0.8147572  
AC023825.2 0.08813386 0 0.02548972 0 0.16287598 0.06838193 0  
0.1382785 0 0.01914266 0 0.037539764 0.06713866 0.063173353 0  
0.03555896 0 0.2117321 0 0.04270507 0.140323908 0 0.06934599  
0.09593886 0.08975328 0.2566277 0.09336335 0.1374232 0.03699668  
0.061135528 0.08344036 0.023217247 0 0.3480976 0.07430094 0



|                   |                  |                    |             |             |                    |             |
|-------------------|------------------|--------------------|-------------|-------------|--------------------|-------------|
| 0.02999016        | 0.1324271        | 0.05684543         | 0.2280114   | 0.03648815  | 0.4918805          | 0           |
| 0.88787502144368  | 0                | 0.1106402          | 0.2448416   | 0.04508608  | 0.0539455          | 0           |
| 0.1867395         | 0.07864704       | 0.087716686        | 0           | 0.0583903   | 0.3951157          | 0.1136154   |
| 0.1419568         | 0.10719904250345 | 0.1609041          | 0.03592712  | 0.3049698   |                    |             |
| 0.03499471        | 0.201209206      | 0.07383744         | 0           | 0           | 0.231827915        | 0.06774962  |
| 0.02707973        | 0.480995398      | 0.1430766          | 0.03793436  | 0.03355923  | 0.03769527         |             |
| 0.06200373        | 0                | 0                  | 0.1050537   | 0.03742366  | 0                  | 0.1254493   |
| 0.3044338         | 0                | 0.02100538         | 0.3288941   | 0.071882167 | 0.05003116         | 0.0198103   |
| 0.06266037        | 0.21533352       | 0.2188308          | 0           | 0           | 0.03263546         | 0.3851079   |
| 0.1921494         | 0.2008999        | 0                  | 0.02507253  | 0.2017984   | 0.218372252        | 1.091392    |
| 0.118334288       | 0                | 0.11866402610666   | 0.09048254  | 0           | 0                  | 0.0346558   |
| 0.03058658        | 0.1110976        | 0                  | 0           | 0.06696951  | 0                  | 0.1257290   |
| 0.1799709         | 0.091679849      | 0.08653468         | 0.02566345  | 0.09884179  | 0.03037138         |             |
| 0.454044527       | 0.08720192       | 0                  | 0           | 0.02778271  | 0                  | 0.05007895  |
| 0.7210955         | 0.04222723       | 0.03185898         | 0.2994131   | 0.02221493  | 5.642609           |             |
| 0.1286608         | 0                | 0.04638616         | 0.04523047  | 0.1330966   | 0.03580627         | 0.078679448 |
| 0.04999961        | 0.03468541       | 0.195758511        | 0.2512537   | 0.1270589   | 0.03357423         |             |
| 0.03166639        | 0.03759299       | 0.4705374          | 0.060290887 | 0           | 0.03727906         | 0.07721498  |
| 0.02256335        | 0.06520124       | 0.2097062          | 0.02449973  | 0           | 0.1501350284206444 |             |
| 0.04408433        | 0.0380177        | 0.4158411          | 0.1792469   | 0.2849603   | 0.0282231          |             |
| 0.05835601603502  | 0.1401257        | 0.03308205         | 0.05695576  | 0.04261005  |                    |             |
| 0.03216659        | 0.03522184       | 0.02641715         | 0           | 0           | 0.07654877         | 0.030613923 |
| 0.07129316        | 0                | 0.07521733         | 0           | 0.1022194   | 0.1285599          | 0.138860375 |
| 0.349054003435482 | 0                | 0.1416484          | 0.064219709 | 0.1144022   | 0.04142824         |             |
| 0.06926237        | 0                | 0.02915159         | 0           | 0.03154026  | 0.05053952         | 0           |
| 0.1477286         | 0                | 0                  | 0.207665664 | 0.159934393 | 0.1936728          | 0.153005894 |
| 0.197177661       | 0.06263986       | 0.037847749        | 0.03093366  | 0           | 0.0236956          | 0.463048697 |
| 0.08923752        | 0.4486775        | 0.1017594          | 0.12516008  | 0           | 0.05440771         | 0.3282314   |
| 0.5506392         | 0                | 0.03227601246558   | 0.04750316  | 0.0497813   | 0                  | 0.02175748  |
| 0.064302585       | 0.3223271        | 0.061599116        | 0.04402685  | 0.1459974   | 0.04483815         |             |
| 0.3618406         | 0.1538854        | 0                  | 0.08041587  | 0.03124357  | 0.03483199         | 0.22653477  |
| 0.07981668        | 0                | 0.1254574          | 0.02636719  | 0           | 0                  | 0.07153525  |
| 0.06420529        | 0                | 0.03547763         | 0.03247763  | 0.1097273   | 0                  | 0.026696092 |
| 0.02140852        | 0                | 0.05660853         | 0.08255257  | 0.03740638  | 0                  | 0.09379188  |
| 0.1680592         | 0.07085209       | 0.1786190342687178 | 0.0387643   | 0.02580213  | 0                  |             |
| 0.03461158        | 0.4447214        | 0.1765238          | 0           | 0.4456763   | 0.09618658         | 0.2537445   |
| 0                 | 0.58628302223194 | 0                  | 0.1840731   | 0.03359486  | 0                  | 0.1895992   |
| 0.2940743         | 0.057523451      | 0.09150311         | 0.2593495   | 0.04307201  | 0                  | 0.2718875   |
| 0.09580088        | 0.1341973        | 0                  | 0.1640865   | 0.03925647  | 0                  | 0.023825868 |
| 0.1344879         | 0.1538874        | 0.4699418          | 0.1416247   | 0.09557806  | 0.274203192        |             |
| 0.2381066         | 0.1138310        | 0.3570242          | 0.02299174  | 0.0462223   | 0.232593049        |             |
| 0.1644211         | 0.1310768        | 0                  | 0.3056437   | 0.143526687 | 0.0482151          | 0           |
| 0.2002939         | 0.853144789      | 0.51348062         | 0.1132706   | 0.6168479   | 0.03224098         |             |
| 0.06722979        | 0                | 0.05912864         | 0.03479142  | 0.0291579   | 0.1350434          | 0           |

0.1222715 0.02774325 0.079406748 0.1011774 1.7275550.1929805  
0.09389125 0 0.1474141 0.06188428 0.04842964 0.1439865 0  
0.02695783 0 0.1546011 0.1182179 0.1190765 0.1135758 0.02493657  
0.1658676 0 0.2332172 0.1548397 0.1346436 0.07766227 0  
0.1752663 0.0800071 0.04033475 0.2658890.3758338 0.02493922  
0.05500955 0 0.1425758 0.02753384 0.18866 0.04496873 0.04325715 0  
0.0543893 0.2090988 0 0.1170474 0.04799535 0.06672974 0  
0.03210939 0.02878897 0.282510615 0.1297249 0 0.09627379 0  
0.1402002 0.027484088 0.17409534 0.1006736 0.076874402 0.0404812  
0.03541929 1.0950920.01919369 0.2166533 0 0.1629402 0 0.04484964  
0.2160209 0.02853986 0.078655433 0 0.06792504 0.1436570.04810425  
0.02336823 0.7168294 0.09052591 0.06493696 0.07144047 0.09775267  
AC005180.2 8.90497 116.87350.6705338 90.042364456 2.253600744 5.600991  
47.8995 80.3157278.6906840.3312 10.4664913.107122138 12.33631  
12.992578012 89.605346985 2.29602 1.7391221.5190462.1649090.2042549  
0.167789441 0.2740751 0.1934778 0 0.1073206 1.5001910.3070026  
0.02738683 0.6193324 0.073101556 10.110240.166569288 0.2164044  
0.06937177 1.1993920.14337833 2.97639 0.5278234 0.5437741 10.36032  
0.2181498 0 0.8173752 5.9907860.05128169 0.3905522 0.4299613 0  
0.1886877 0.5805381 0.0737309 0.0669870.5642435 0.069923621  
0.2909689 0.0698190.1181129 0.05434129 0.2546137.9899470.1524679  
2.8474880.08591823 1.5498110.1255326 0.818012088 0.1324344 0.05956487  
0 1.900823899 0.1620204 0.09310625 0.06476006 0.132724709 0.3177217  
0.3175146 0.3611499 0.13522 4.96736 0.1505622 3.0981670.5217886  
4.9408860.2461172 0 0.2750062 0.4120585 0.2316494 0.2033911  
0.3767513 0.4915855 1.575779899 0.1196475 0.1421266 0.03746242  
0.193110488 0.2616624 1.7223091.2091570.2341391 0.2437861 0.1969361  
0.2402219 0.1533866 0.1199199 0.2412963 0.580253671 1.914014  
1.768697545 1.0422160.09459334 5.89992 0.1622890.5011389 0.3062959  
0.5801455 0.5155428 0.03657327 0.09963203 0.2251128 0.5576025 0  
0.4075145 0.8519143 0.3102394 2.9543570 29.180650.986618733  
0.05173604 1.7491330.1181884.6847590.746507372 0.1042699 2.02033  
0.6728155 0.2325443 0.7530367 1.1976180.08275619 0.3832157  
0.1009847 0.3047578 0.1591187 0.05312609 1.6265170 0.1176695  
0.3882571 0.02704171 0 0.3853315 0 0.1793581.8248720.100317529  
0.3755393 0 0.2007285 8.2923130.4495105 0 0.576732754 0 0  
0.2769847 0 0.5847228 3.1881321.3182780.1479926 12.745980.67966808  
0.89612 0.1363767 0.05849806 0.1786090.02621042 2.6322810.209334  
0.04793386 7.3387960.07911436 7.42330224.880630.5000130 6.096438  
0.3049170.08513441 0.04576581 0.21963583 2.7279151.4803611.843762  
0.3339824 2.5260190.2152120.066415781 0.1517724 0.1643163 0.2371966  
0.1129155 27.567395548 1.1399511.9814790.5383239 0.05512261 0  
0.2114476 0.07542725 0.1007193 0.1360463.1057370.0883217 0.2272819  
0 0.248311969 0.054639508 0 0.036590733 1.060970189 3.5577660.090511344

0 14.503140.1983347 0.046140084 0.1067039 0.1192216 0 0.798173893  
1.9459440.06505691 3.8177210.3178558 0.1606226 0.03859337 0.8943275  
0.08520139 0 0.02888819 0.9105622 0.2306655 0.0642360.515591175  
14.950957.3320810.08042145 0.3365161 0.09200266 0.09759938 3.653914  
4.1841920 4.469426211 0.7953263 0.04641778 0.5357610.03152803  
0.8162863 0.06639087 1.6251990.1216359 0.5885866 0.5341112  
0.04242165 3.4951020.2624083 0.3404380.031921306 0.2047904 0  
0.3384425 0.1727435 0.1341837 0.1258610.03738324 0.1148305  
0.9319193 0.04271601 0.074502033 0.185406475 1.6043230.2732634  
36.957773.6843820.6332241 11.095410.8684432 0.03833771 1.554975  
0.4552941 2.1965790.1595004 0.6271332 3.7417280.08034074 0.2880646  
0.05667733 0.5626133 0.240738713 0.3647099 0.1162919 6.64382  
0.08611801 0.3715473 0.5345757 0.4279030.1145897 0.1635026  
0.04694012 0.05267121 0.085467884 14.633810 0.9509471 1.219283  
0.03809517 1.967237134 1.9692520.05444446 0.2051955 0.5692059  
0.5498381 0.05526937 0.591001556 1.6711270.7444791 0.1401206  
0.1305240.085809549 0.05765222 0 2.68237 0.097155278 0.613983944  
0.3482767 0.1017356 0.1156545 0.3215546 0.04128456 0.6363168  
0.04160113 0.03486497 1.1949180.2653275 0.1218364 0.06634684  
0.569693963 0.1209808 0.4986144 0.7845585 2.3295721.8161273.419588  
0.07399686 0.05790875 0.05738963 0.04780148 0.6769196 0.1717638  
0.3697222 0.4240698 0.1898443 0 1.4610530.2479161 0 0.08580453  
0.6942990.2897953 0.09286307 0.07758037 0.1257426 0.4145564  
0.04822945 0.04541876 0.5135949 0.2385645 0.2302179 0.04630602  
0.1420684 0.03292303 0.08459488 31.563250.3103431 0.07622131  
0.03251744 0.1500154 0.03661386 0.4898497 0.8321471 1.675605  
0.1327403 0.3455474 0.9294431 0.394107335 1.4736010.3650861  
0.3453523 0.0564695 11.343750.131454145 1.734757835 0.4012615  
0.091920993 0.1452137 0.1270557 2.6188680.4131083 1.5284470.3088991  
2.04574 1.7436770.01787601 1.5175270.06825191 0.125400832 1.364126  
0.08121998 0.08588748 0 1.4250460.4137889 0.2164890.3105882  
5.9796430.8474218  
AC023024.1 0.04001754 0.04700684 0.02645419 0.012218981 0.072445223  
0.09758286 0.09346795 0.1166024 0.1414494 0.02980047 0.2390638  
0.068180328 0.2322635 0.065563696 0.094435997 0.06458275 0.06289488  
0.1538205 0.02539244 0.2603855 0.060680609 1.0506570.1739272 0.30493  
0.1785363 1.07275 0.3936401 0.6715167 0.2975733 0.118966433  
0.1659787 0.13855049 0.1207472 0.1128965 0.1735027 0.149334897  
0.8403729 0.4352199 0.1769890.1380393 0.07573757 0.1351303  
0.2182904 0.1398660.2336782 0.7318913 0.1722399 0.03630084  
1.0411230.12597 0.4879619 0.3682302 0.14284 0.151726159 0.06313688  
0.2499736 0.2221191 0.1179143 0.3683204 0.2595953 0.8270942  
0.0417481 0.5033680.05934548 0.2269927 0.271469285 0.009578911  
0.09693665 0.03354358 0.842099237 0.4482461 0.06060893 0.7236874

|             |             |             |             |             |             |
|-------------|-------------|-------------|-------------|-------------|-------------|
| 0.038399633 | 0.1962194   | 0.2559031   | 0.06095082  | 0.2249491   | 0.4343613   |
| 0.0653405   | 0.2531912   | 0.04245828  | 0.009085721 | 0.4078168   | 0.011103118 |
| 0.2386927   | 0.1844121   | 0.1005305   | 0.1412272   | 0.6213051   | 0.7111225   |
| 0.186505083 | 0.1103390   | 0.2312987   | 0.7153443   | 0.027935159 | 0.4315106   |
| 0.03833036  | 0.3816335   | 0.6604712   | 0.04114348  | 0.2920078   | 0.271052    |
| 0.3827557   | 0.2797281   | 0.3291105   | 0.384020393 | 3.7945030   | 0.54497737  |
| 0.05025531  | 0.09236546  | 0.5215688   | 0.8451559   | 0.6524480   | 0.7975518   |
| 0.2517697   | 0.3449227   | 0.6110702   | 0.3819356   | 0.3223893   | 0.06721849  |
| 0.08687936  | 0.2475926   | 0.1902925   | 0.8129987   | 0.1317249   | 0.2166897   |
| 0.2334758   | 0.047574408 | 0.02245224  | 0.1931001   | 0.1987521   | 0.165483    |
| 0.161983453 | 0.4072565   | 0.1295238   | 0.2773870   | 0.4108838   | 0.3870006   |
| 0.1819084   | 0.1795713   | 0.2806426   | 0.2355595   | 0.1818545   | 0.08631729  |
| 0.2997214   | 0.2614336   | 0.3087858   | 0.2212853   | 0.2647772   | 0.09388379  |
| 0.1467660   | 0.1858055   | 0.489939048 | 0.7135080   | 0.5219685   | 0.007255914 |
| 0.3096532   | 0.1153832   | 0.1306673   | 0.1971875   | 0.09753858  | 0.05232231  |
| 0.500577309 | 0.2463575   | 0.1644309   | 0.09015371  | 0.07610558  | 0.3045074   |
| 0.09327475  | 0.1303121   | 0.03211269  | 0.04544626  | 0.189617272 | 0.3202667   |
| 0.1282327   | 0.1967477   | 0.07751216  | 0.1535587   | 0.04393651  | 0.8251853   |
| 0.1664175   | 0.1090708   | 0.0343338   | 0.3916094   | 0.08475945  | 0.01669185  |
| 0.1553569   | 0.2330421   | 0.3638990   | 0.2586245   | 0.3277115   | 0.230349083 |
| 0.4069491   | 0.2190145   | 0.3122536   | 0.3768457   | 0.1237683   | 0.2201502   |
| 0.014411455 | 0.3293286   | 0.1069642   | 0.5833144   | 0.3062669   | 0.149961698 |
| 0.01978849  | 0.4837027   | 0.3504302   | 1.8419890   | 0.06050924  | 0.4358759   |
| 0.2782363   | 0.4239856   | 0.1279218   | 0.01225289  | 0.1533183   | 0.08014099  |
| 0.03483638  | 0.026940411 | 0.029640351 | 0.2638137   | 0.142915776 | 0.025579805 |
| 0.3331763   | 1.139114966 | 0.1765727   | 0.1691943   | 0.3196984   | 0.090106774 |
| 0.335726    | 0.07114166  | 0.1518141   | 0.357213634 | 0.2996594   | 0.2540987   |
| 0.1858096   | 0.3990466   | 0.7435359   | 0.1591120   | 0.04851468  | 1.3804160   |
| 0.1420785   | 0.2145170   | 0.233574794 | 0.2787694   | 0.135851023 | 0.3712534   |
| 0.09199524  | 0.04653473  | 0.3442376   | 0.2096169   | 0.5153298   | 0.2295113   |
| 0.00810644  | 0.4518744   | 0.16163562  | 0.3865716   | 0.08057697  | 0.0325511   |
| 0.2257601   | 0.1566872   | 0.04321815  | 0.1392037   | 0.4222972   | 0.5386303   |
| 0.2317919   | 0.01841001  | 0.04213314  | 0.02846978  | 0.0492474   | 0.166237286 |
| 0.4388168   | 0.3587967   | 0.4406286   | 0.2516738   | 0.1649925   | 0.3095176   |
| 0.1541229   | 0.5419424   | 0.5055392   | 0.5097884   | 0.129328625 | 0.241386345 |
| 0.2744789   | 0.3409462   | 0.08980301  | 0.1236291   | 0.1282421   | 0.06294317  |
| 0.1199177   | 0.07486956  | 0.4443958   | 0.08232795  | 0.09127     | 0.2884144   |
| 0.7514018   | 0.1591984   | 0.1002398   | 0.01785905  | 0.5165296   | 0.03052014  |
| 0.858187702 | 0.4036029   | 0.04205667  | 1.1343070   | 0.09343305  | 0.1209322   |
| 0.1988516   | 1.7061190   | 0.1367554   | 0.04966943  | 0.07129824  | 0.2342954   |
| 0.049454775 | 0.1831943   | 0.2528744   | 0.05627577  | 0.08084089  | 0.06612969  |
| 0.158707211 | 0.1544475   | 0.04725527  | 0.9731902   | 0.3190703   | 0.05368882  |
| 0.131921    | 0.0905227   | 0.2986243   | 0.6121642   | 0.1064159   | 0.8553304   |
| 0.099304951 | 0.1125888   | 0.1322850   | 0.1247236   | 0.231897271 | 0.099920553 |
| 0.2687005   |             |             |             |             |             |

[illegible]

|             |             |             |             |             |             |             |             |            |            |            |
|-------------|-------------|-------------|-------------|-------------|-------------|-------------|-------------|------------|------------|------------|
| 0.1185924   | 0.1318044   | 0           | 0           | 0.05984943  | 1.3617620   | 0.1459193   | 0           | 0          |            |            |
| 0           | 0.06271041  | 0           | 0.1327194   | 0           | 0.053688554 | 0.1138705   | 0           | 0.04020055 |            |            |
| 0           | 0           | 0           | 1.0855070   | 0.08944359  | 0.1020983   | 0.07327874  | 0.08222561  | 0          | 0          |            |
| 0           | 0           | 0.05287321  | 0           | 0           | 0.0370388   | 0           | 0.0915237   | 0          | 0          | 0.08628163 |
| 0.162815135 | 0.05115323  | 0           | 0           | 0.0407525   | 0.089305494 | 0.09000152  | 0           | 0          |            |            |
| 0.075835092 | 0           | 0.06041096  | 0           | 0           | 0           | 0           | 0           | 0.1632843  | 0          |            |
| 0.06903429  | 0.1521601   | 0           | 0           | 0           | 16.568640   | 0.07204606  | 0.08763184  |            |            |            |
| 0.05559168  | 0           | 0.05775866  | 0           | 0.08959159  | 0.07462342  | 0.2012851   | 0           |            |            |            |
| 0.08245393  | 0           | 0           | 0           | 0.04654827  | 0.0774049   | 0.1846593   | 0.0669752   |            |            |            |
| 0.07225853  | 0.05026696  | 0           | 0.06055579  | 0           | 0.04978219  | 0.07529154  | 0           | 0          |            |            |
| 0           | 0.1540268   | 0.2168665   | 2.3065590   | 0.04402067  | 0           | 0           | 0.1189899   |            |            |            |
| 0.05076334  | 0           | 0.05715831  | 0.1092442   | 0           | 0.1868433   | 0           | 0           | 0.1074788  |            |            |
| 0.087892191 | 0.04035885  | 0           | 0.05990369  | 0           | 0           | 0           | 0.270814973 | 0.1252828  |            |            |
| 0.071749442 | 0           | 0           | 3.0662590   | 0.1074847   | 0           | 0           | 0.20277     | 0          | 0.05581289 | 0          |
| 0           | 0.097882316 | 0.07605542  | 0           | 0.06703995  | 0           | 0           | 0.04614074  | 0          |            |            |
| 0.1818235   | 0.06667777  | 0.04561791  |             |             |             |             |             |            |            |            |
| MIR762HG    | 0.8484158   | 0.3353932   | 0.7078136   | 0.435911295 | 0.249832908 |             |             |            |            |            |
| 0.3924332   | 0.5201762   | 0.5503715   | 0.2883542   | 0.2693262   | 0.8063389   |             |             |            |            |            |
| 0.667152962 | 0.7954544   | 0.783558416 | 0.344386429 | 0.3291408   | 0.7180065   |             |             |            |            |            |
| 0.9720777   | 1.2772821   | 1.7946010   | 0.623455644 | 0.6082001   | 1.0526840   | 0.5416977   |             |            |            |            |
| 0.8529281   | 0.4750794   | 1.5555412   | 0.9934790   | 0.4109384   | 0.667741435 | 0.5457873   |             |            |            |            |
| 1.220651558 | 1.1487061   | 1.1814220   | 0.7565187   | 1.829112511 | 1.5323241   | 1.291146    |             |            |            |            |
| 1.4732831   | 1.2381711   | 1.3104370   | 0.5570661   | 1.9079361   | 1.2210120   | 0.5398846   | 1.209313    |            |            |            |
| 1.1265190   | 0.5827634   | 1.4022140   | 0.7390088   | 0.7191505   | 1.3136590   | 0.6842942   |             |            |            |            |
| 1.407333269 | 0.8366072   | 1.3836091   | 0.3653810   | 0.5384429   | 1.0511841   | 1.217166    |             |            |            |            |
| 0.7711040   | 0.8102122   | 0.2261331   | 0.63726     | 2.2026420   | 0.864168596 | 0.5877704   |             |            |            |            |
| 1.4478370   | 0.6102990   | 0.882862009 | 0.5393093   | 0.3459551   | 1.0226740   | 0.315077977 |             |            |            |            |
| 2.2400361   | 1.1517      | 0.6709628   | 1.0607012   | 2.2268051   | 1.4763110   | 0.9717811   | 1.353129    |            |            |            |
| 0.7390221   | 1.5795880   | 0.697141237 | 0.7121924   | 0.4864391   | 0.5123454   |             |             |            |            |            |
| 1.6248434   | 0.4018951   | 1.1974280   | 0.789555312 | 0.9261967   | 0.9095058   | 1.125194    |             |            |            |            |
| 1.315492051 | 1.7824760   | 0.8204599   | 1.1742721   | 0.8366480   | 0.5116299   | 0.5793067   |             |            |            |            |
| 1.72568     | 1.3654780   | 0.9468713   | 0.9713006   | 0.817502294 | 0.9967443   | 1.80728731  |             |            |            |            |
| 0.6454277   | 1.5816630   | 0.7056135   | 1.03853     | 0.8657053   | 0.6006661   | 0.6800556   |             |            |            |            |
| 0.6518373   | 1.5854461   | 1.1208921   | 0.4916730   | 0.4987872   | 0.4215205   | 0.567826    |             |            |            |            |
| 0.9620516   | 1.8399780   | 0.5263191   | 2.3592010   | 0.6130314   | 1.731158012 | 1.818229    |             |            |            |            |
| 0.6461250   | 0.4574496   | 1.0008      | 1.05068155  | 1.2053560   | 0.5687081   | 2.270817    |             |            |            |            |
| 0.8434923   | 0.4295268   | 2.2435371   | 0.6229031   | 0.3645860   | 0.6957373   | 1.309325    |             |            |            |            |
| 0.4064759   | 0.7731531   | 0.2124610   | 0.8931821   | 1.9432220   | 0.8243702   | 1.523931    |             |            |            |            |
| 0.8007795   | 0.6098311   | 0.932188895 | 1.3884191   | 0.2328510   | 0.921521058 | 1.872151    |             |            |            |            |
| 1.6935591   | 0.7527410   | 0.9262289   | 1.64241     | 0.72175     | 1.138451391 | 1.0405920   | 0.8557546   |            |            |            |
| 1.7010270   | 0.7518632   | 0.3621093   | 0.5656869   | 0.4898327   | 0.8363011   |             |             |            |            |            |
| 0.4817554   | 0.330712953 | 1.2894490   | 0.4926591   | 1.1320910   | 0.4756215   | 0.8683953   |             |            |            |            |
| 1.61968     | 1.2315531   | 0.8849760   | 0.7989712   | 0.6736708   | 0.9594928   | 1.083305    |             |            |            |            |
| 0.9289498   | 0.5998774   | 0.5086065   | 1.0385661   | 0.3048780   | 0.8219187   | 0.83877088  |             |            |            |            |

1.09544 3.9483350.7936983 1.2513210.6433907 0.7425451 0.771191505  
1.0338923.7523420.6202106 0.8216390.737093649 0.4376908 0.935662  
1.1924581.2374490.8310852 0.5565207 0.5838858 1.09778 2.330947  
0.9441813 0.6153322 0.8005268 1.7026160.499770591 0.346832933 1.75682  
0.634481301 0.876055458 2.0525170.82677001 0.91625 0.6438395 1.412493  
1.228673568 2.16412 1.2736011.3751821.652802646 1.2439661.5712591.21527  
1.1810571.6412710.7409076 1.3615290.9673370.5713742 1.6906040.8216775  
0.928508066 1.6309931.619293119 1.1655111.0424941.4194051.7565051.253467  
1.0980241.2951611.0642440.6835131.132299413 0.9949161.1354581.074993  
1.2398241.52626 1.7679360.9534881.0294710.6973084 0.5788412 1.983463  
1.0461560.6906471 2.8695991.344247512 1.4584691.0472771.2365920.3591378  
1.2741661.0262584.3292060.5866795 3.1610570.7406933 0.519051353  
1.17689697 0.8884462 2.6864870.9995595 1.1173170.6535757 1.268704  
1.0572910.8072254 0.9394838 0.9868468 1.1721780.6996632 1.401521  
0.5225039 0.3793721 0.6243781 1.0266560.7294986 0.692183015  
1.3212751.2963190.3269202 0.9199681 0.4026631 2.7075490.7121697  
0.7273760.7999105 1.0755620.4811218 0.890969332 0.5975264 0.3988354  
0.3747584 0.8494671 0.6251806 0.788756899 0.8448521.0452141.642888  
0.5874999 1.2428461.7284850.516702576 0.9537331.3952641.0629860.4203233  
0.681969227 1.2139050.6006329 0.6377623 0.962666957 1.675389659  
0.4014084 0.9686744 0.5968578 1.3317051.4317440.3502761 1.842047  
0.6801262 1.7199840.6435594 1.4109390.6368566 1.754210997 0.6742932  
2.0512071.3718520.5475179 0.8049308 0.8296125 0.7790259 0.8875832  
1.2616871.3321211.29754 0.6382231 1.3737781.2693281.01402 0.5536742  
1.9665680.6294746 1.5993640.7439229 1.57655 1.7348330.5175773  
0.8167524 1.37571 0.6813167 2.2102110.4640971 1.3120020.7940979  
1.2831320.7455907 0.4399032 0.5403005 1.0477650.7658806 0.8328252  
1.2036671.7016210.4335431 0.9409863 0.8017264 1.0662112.248296  
3.1922531.2245090.6608614 2.196578404 0.5043189 2.1478731.176291  
1.7310470.6748151 0.437564858 0.837959719 0.8448821 0.498095299 1.55876  
1.3245060 1.3786461.1149951.0162610.8948692 1.5562271.3173690.5498713  
0.8559127 0.582440228 1.01072 0.8173459 1.4095010.9973880.7613794  
1.1073780.3686873 0.9977752 0.96545 4.469802  
AC011442.1 0.7281879 0.08316101 0 0 0.213607842 0.6277685 0  
0.06347212 0 0.03514718 0.1537941 0.137850936 0.6985356 0.173985628  
0 0.5223086 0.5722403 0.07775079 0.2695345 1.5681860.601169092  
1.12226 0.7639427 0.4844126 0.3295858 0 0.9856721 1.387749  
1.0189250 0.05106733 3.410271036 0.2373522 0.1065217 1.97811  
0.044032034 2.3677480.4862897 0.4174877 0.4186438 0.1339893 0.10625  
5.0203810.7568770.3149761 0.6542186 0.2539284 0.1284415 0.2069525  
0.6933323 0.1132152 0.2742928 2.2382170.536845289 0.1914807  
0.3216252 0.1209097 0.6675368 0.3475227 0 1.5607830.1181722  
0.4617518 0.06999308 0 0.591093274 0 1.0975560.4747424 0.060807322  
0.4975710.4288993 0.1988806 0.067933776 0.2251698 0.2785999

|             |             |             |             |             |             |             |
|-------------|-------------|-------------|-------------|-------------|-------------|-------------|
| 0.1848509   | 0.2768439   | 0.5692146   | 0.07706371  | 1.4827930   | 2.003041    | 0           |
| 0.2748492   | 0.078571246 | 0.1151665   | 0.6722690   | 0.3557021   | 0           | 0           |
| 0.307954204 | 0           | 0.03637302  | 0.4601942   | 0.988416159 | 1.1250050   | 0.1687894   |
| 0.3595251   | 0.7486764   | 0.4535986   | 0.5164116   | 0.3532921   | 1.1048350   | 0.4763765   |
| 0           | 11.889611   | 1.520886588 | 0.2667239   | 0.5083746   | 1.1983390   | 0.1215013   |
| 0.8622591   | 1.2726060   | 0.3298441   | 0.8423844   | 0.8159301   | 0.4147980   |             |
| 0.3688812   | 0.1877239   | 0.1538977   | 0.7328901   | 0.9321519   | 0           | 0.1321753   |
| 0           | 0.07944167  | 0.1413593   | 0.22685     | 1.0595130   | 1.04206941  | 0.3202169   |
| 0.2820233   | 0.6198727   | 0.4590979   | 0.1825741   | 0.09194823  | 0.1270737   |             |
| 0.07355437  | 0.5039578   | 0.1754855   | 0.06108245  | 0.5302449   | 6.197619    |             |
| 1.2402050   | 0.4215955   | 0.3406721   | 0.2491383   | 0.2443741   | 0.3944559   | 0           |
| 0.9180257   | 0.3821081   | 0.10269299  | 0.1153296   | 0.1166442   | 0.3082224   |             |
| 0.2907079   | 0.1380464   | 0.1234197   | 0.332094065 | 0.3486699   | 0.2737872   |             |
| 0.2126576   | 0.0828556   | 1.1372810   | 0.1100098   | 0.4723227   | 0.2272455   |             |
| 0.09188589  | 0.149091905 | 0.7284755   | 0.1396060   | 0.2245622   | 0.0548515   |             |
| 0.5634524   | 0.1554584   | 3.1072180   | 0.4416202   | 0.1543680   | 0.1214816   | 1.098032    |
| 0.2086263   | 0           | 0.1940088   | 1.1640870   | 0.3901715   | 0.6536276   | 0.5621942   |
| 0.281045848 | 0.06544946  | 0.05166189  | 0.2762079   | 0.7692546   | 0.250242    |             |
| 0.9913866   | 0.050991351 | 0           | 0.3153885   | 0.6879709   | 0.08669194  | 0           |
| 0.3500832   | 0           | 0.6358513   | 1.7774780   | 0.1605727   | 1.3798980   | 0.05790999  |
| 0.2474503   | 0.6267039   | 0.5202456   | 0.2712393   | 0.2181223   | 0.4930395   |             |
| 0.095321944 | 0           | 0.9778888   | 0           | 0           | 0.05750544  | 0.625418548 |
| 0.1596405   | 1.43572     | 0.283395924 | 0.5734608   | 0.1830670   | 0.2335462   | 0.306402819 |
| 0.4819411   | 0.6992729   | 0.05478676  | 0.2091744   | 0.1644260   | 0.2963043   |             |
| 0.1144381   | 1.6571590   | 0.1828035   | 0.4435838   | 0.4793779   | 0.472255048 |             |
| 0.4931781   | 0.056550008 | 1.0912880   | 0.3446495   | 0.1234887   | 0           | 0.3531796   |
| 0.6993734   | 0.7382441   | 0           | 0.4476767   | 0.207966346 | 0.4884955   | 0.2851016   |
| 0.1974411   | 0.8230021   | 0.3374601   | 0.1529167   | 0.3940302   | 0.3112903   |             |
| 0.8251959   | 0.7517931   | 0.06513925  | 0.05963106  | 0           | 0           | 0.490157753 |
| 0.5109968   | 0.5770514   | 0.6236219   | 0.03789298  | 0.4120834   | 0.5153651   |             |
| 0.05740268  | 0.4408111   | 0.3902673   | 0.3279563   | 0.228798593 | 0.142347594 |             |
| 0.1894976   | 0.3147008   | 0.1906474   | 0.2332965   | 0.1944655   | 0.4454175   |             |
| 0.06061414  | 0           | 0.6406009   | 0.2330376   | 0.2152908   | 0.04081931  | 2.847057    |
| 0.1126568   | 0.5243001   | 0.06318982  | 0.3481165   | 0.4319517   | 2.481995463 |             |
| 1.0080340   | 0.1190457   | 1.5025780   | 0           | 0.1172645   | 2.7924760   | 0.6025472   |
| 0.2883098   | 1.1727260   | 0.174983427 | 0.86425     | 0.3767298   | 0.1991178   | 0           |
| 0.1754876   | 0.038727311 | 0.3278845   | 0.04180025  | 0.8102098   | 0           | 0.2110717   |
| 0.3394687   | 0.053382011 | 0.1006293   | 0.9024962   | 0.3227367   | 1.082279    |             |
| 0.307445143 | 0.4426304   | 0           | 0.2942022   | 0.149183788 | 0.117848011 | 0.5050753   |
| 0.2343255   | 0           | 0.5554723   | 0.2535729   | 0           | 1.9802590   | 0.05353582  |
| 0.5432207   | 0.03741643  | 0.3565690   | 0.242993327 | 0           | 8.7500790   | 0.2834599   |
| 0.04309763  | 0           | 0.8119859   | 0.2272472   | 0           | 0.4406144   | 0.07340008  |
| 0.04949634  | 1.7934771   | 0.0137780   | 0.2170557   | 0.2915096   | 0.1737772   | 1.0072740   |
| 0.5448964   | 0.1976317   | 0.1421479   | 0.3461003   | 0.1425930   | 0.1786892   |             |



|             |             |             |             |             |             |
|-------------|-------------|-------------|-------------|-------------|-------------|
| 0.2574403   | 0.1958644   | 0.2221717   | 0.06974137  | 0.1971587   | 0.8242209   |
| 0.3535040   | 0.7821416   | 0.1745190   | 0.1011079   | 0.1298971   | 0.1651311   |
| 0.3176918   | 1.4044710   | 0.1997246   | 0           | 2.3050730   | 0.4298134   |
| 0.1321839   | 0.4900807   | 0.6794178   | 0.2947748   | 1.0571691   | 0.123867366 |
| 0.1587889   | 0.1681790   | 0.1178433   | 0           | 0.1716112   | 0.201850354 |
| 0.106550153 | 0           | 0.070573222 | 3.27035     | 0.5202570   | 0.3171678   |
| 0.4375686   | 0.5336106   | 0.4986147   | 0.1574970   | 0.2744896   | 0.04957856  |
| 1.5196310   | 0.144416532 | 1.6457890   | 0.5612167   | 0.1978228   | 0.2649677   |
| 0.3432448   | 0.04538434  | 0.4155288   | 0.5365283   | 0.06558469  | 0.8076614   |
| AL021368.2  | 0.2268558   | 0.4890837   | 0.1280201   | 0.266091592 | 0.064273929 |
| 0.2618752   | 0.3482869   | 0.3863118   | 0.2151342   | 0.3509202   | 0.152501    |
| 0.146118902 | 0.3905885   | 0.241928446 | 0.375759905 | 0.07143683  | 0.421767    |
| 0.1701452   | 0.04300868  | 0.2949140   | 0.117460969 | 0.2830027   | 0.1857519   |
| 0.0271038   | 0.2516848   | 0.1145682   | 0.1641185   | 0.4975172   | 0.08826115  |
| 0.072923993 | 0.2549359   | 0.212807412 | 0.0844037   | 0.1675447   | 0.1539329   |
| 0.009033478 | 0.16192     | 0.1551911   | 0.2212638   | 0.2767492   | 0.09621091  |
| 0.2034473   | 0.1650587   | 0.1353711   | 0.1615488   | 0.1118479   | 0.09377132  |
| 0.1624958   | 0.1245427   | 0.04741398  | 0.09677869  | 0.2415053   | 0.1234371   |
| 0.110137542 | 0.1134859   | 0.4838801   | 0.07855065  | 0.03138433  | 0.2435971   |
| 0.2288193   | 0.1761130   | 0.1575850   | 0.04059925  | 0.1196630   | 0.1406065   |
| 0.242533787 | 0.05562641  | 0.5754376   | 0.7183007   | 0.09564201  | 0.2509470   |
| 0.02933056  | 0.1088046   | 0.097559605 | 0.1257534   | 0.09526117  | 0.07163316  |
| 0.1325251   | 0.1829527   | 0.1686417   | 0.1901283   | 0.2054689   | 0.08793729  |
| 0.09632817  | 0.032238874 | 0.1076351   | 0.09194711  | 0.05559982  | 0.3417214   |
| 0.1424221   | 0.1204470   | 0.051144861 | 0.2230088   | 0.0646722   | 0.4877955   |
| 0.243336534 | 0.2088215   | 0.03246121  | 0.1558274   | 0.2294727   | 0.06826496  |
| 0.1826712   | 0.1664857   | 0.3181080   | 0.1416654   | 0.1665063   | 0.082256813 |
| 2.1560290   | 0.1459207   | 0.2731577   | 0.05572543  | 0.1306519   | 0.3489758   |
| 0.1876196   | 0.07397381  | 0.0225566   | 0.1612996   | 0.1081084   | 0.3214840   |
| 0.08457574  | 0.09670037  | 0.1882851   | 0.2499544   | 0.1202860   | 0.06374581  |
| 0.07767624  | 0.2937642   | 0.178426254 | 0.1113697   | 0.2126729   | 0.05895048  |
| 0.2173665   | 0.078388853 | 0.1094912   | 0.1542908   | 0.1554314   | 0.1046524   |
| 0.03329452  | 0.2452296   | 0.1245569   | 0.1358117   | 0.1590622   | 0.2240129   |
| 0.04594879  | 0.07252228  | 0.7780727   | 0.05250282  | 0.1276805   | 0.1630796   |
| 0.07666869  | 0.03760128  | 0.1348756   | 0.069153237 | 0.06905776  | 0.3135685   |
| 0.017556817 | 0.2918148   | 0.1834662   | 0.1011744   | 0.1749462   | 0.09440393  |
| 0.1772428   | 0.075701562 | 0.09060728  | 0.09361557  | 0.07756124  | 0.3513003   |
| 0.1187072   | 0.1617465   | 0.2076435   | 0.1126674   | 0.1602337   | 0.035685114 |
| 0.1439166   | 0.06682932  | 0.1750679   | 0.03751056  | 0.2724767   | 0.07796158  |
| 0.435969    | 0.2969714   | 0.09149014  | 0.0539994   | 0.1787849   | 0.4208777   |
| 0.06058281  | 0.1724765   | 0.1857493   | 0.06937355  | 0.03128912  | 0.1153381   |
| 0.096097515 | 0.2327418   | 0.3921555   | 0.08499896  | 0.1613250   | 0.1411819   |
| 0.06456821  | 0.034870767 | 0.23109     | 0.06039054  | 0.09409468  | 0.1837830   |
| 0.298348064 | 0.2236754   | 0.1174044   | 0.1157657   | 0.1830144   | 0.0888143   |
| 0.04752255  | 0.04442039  | 0.2761931   | 0.2431118   | 0.1159305   | 0.2147966   |
| 0.1770133   |             |             |             |             |             |

|             |             |             |             |             |             |
|-------------|-------------|-------------|-------------|-------------|-------------|
| 0.189040941 | 0.14057014  | 0.2857325   | 0.088372911 | 0.115536088 | 0.09438113  |
| 0.104548043 | 0.1514778   | 0.2074253   | 0.5682693   | 0.101746126 | 0.4649955   |
| 0.1533596   | 0.3290069   | 0.20953556  | 0.1252399   | 0.2664270   | 0.2322909   |
| 0.4958903   | 0.1293104   | 0.07699925  | 0.1173888   | 0.1729711   | 0.09375851  |
| 0.1213391   | 0.2731881   | 0.141292675 | 0.07419786  | 0.255235798 | 0.3814344   |
| 0.1859339   | 0.04785417  | 0.1009620   | 0.01449145  | 0.1332326   | 0.2069897   |
| 0.1922250   | 0.2842790   | 0.18488488  | 0.1002182   | 0.2242138   | 0.4410699   |
| 0.2847183   | 0.01648388  | 0.1394308   | 0.1886221   | 0.1404994   | 0.1236120   |
| 0.5094448   | 0.1024556   | 0.08155818  | 0.07577579  | 0.03972059  | 0.227934345 |
| 0.1075226   | 0.2052026   | 0.1705871   | 0.05960074  | 0.8078436   | 0.08810895  |
| 0.06280831  | 0.1386677   | 0.1467877   | 0.2422170   | 0.13690723  | 0.06814173  |
| 0.2170619   | 0.1362998   | 0.1694881   | 0.3509909   | 0.1551509   | 0.06472785  |
| 0.1326444   | 0.0603862   | 0.2588649   | 0.1274914   | 0.3827928   | 0.1200326   |
| 0.1517498   | 0.2542355   | 0.1349820   | 0.08642554  | 0.1755705   | 0.0886179   |
| 0.234736953 | 0.3868024   | 0.06512812  | 0.1108670   | 0.08590883  | 0.03413834  |
| 0.1002401   | 0.4156304   | 0.1143113   | 0.1579547   | 0.1774463   | 0.4728895   |
| 0.038890655 | 0.1899717   | 0.2576291   | 0.1951742   | 0.06757338  | 0.0720050   |
| 0.222464956 | 0.05730218  | 0.03716099  | 0.1754546   | 0.1942553   | 0.08083195  |
| 0.1218776   | 0.237286631 | 0.2615008   | 0.1110920   | 0.06253325  | 0.1425424   |
| 0.0750887   | 0.1331861   | 0.05237742  | 0.1458643   | 0.198939592 | 0.072532016 |
| 0.03250814  | 0.1041593   | 0.08501209  | 0.2279180   | 0.2861224   | 0.06681802  |
| 0.1354213   | 0.03294974  | 0.06443325  | 0.04643562  | 0.02558747  | 0.2159743   |
| 0.179466372 | 0.07622335  | 1.2191990   | 0.1986921   | 0.3772492   | 0.1271379   |
| 0.1924977   | 0.1592896   | 0.02432341  | 0.1807902   | 0.1054098   | 0.2707871   |
| 0.06853862  | 0.2495803   | 0.1335915   | 0.34388     | 0.08794061  | 0.2129114   |
| 0.0676859   | 0.4388765   | 0.1396568   | 0.2673241   | 0.1487722   | 0.03412961  |
| 0.1425641   | 0.1232366   | 0.04353152  | 0.4102207   | 0.0524624   | 0.2494323   |
| 0.1784888   | 0.2486531   | 0.09724956  | 0.1581334   | 0.02765731  | 0.09771405  |
| 0.4065334   | 0.2878637   | 0.3041447   | 0.1195101   | 0.01575274  | 0.08458404  |
| 0.04776374  | 0.06026322  | 0.3896059   | 0.2137272   | 0.4192940   | 0.2421888   |
| 0.14780077  | 0.1710274   | 0.1686818   | 0.09670551  | 0.08894579  | 0.08508416  |
| 0.110429342 | 0.054648761 | 0.06741673  | 0.053088152 | 0.07115977  | 0.1645488   |
| 0.2750008   | 0.1759278   | 0.3101154   | 0.0810918   | 0.2318670   | 0.06462321  |
| 0.1651861   | 0.06441878  | 0.1110879   | 0.04279608  | 0.07673753  | 0.3923204   |
| 0.1262636   | 0.07247995  | 0.2875445   | 0.2203582   | 0.2301713   | 0.1793774   |
| 0.1076412   | 0.3037785   |             |             |             |             |
| COL4A2-AS1  | 0.02741942  | 0.2818234   | 0.03172054  | 0.058605852 | 0.086867189 |
| 0           | 0.40347     | 0.04301999  | 0.2422976   | 0.4764395   | 0.05211913  |
| 0.093432301 | 0.08355034  | 0.314462913 | 0.503270023 | 0.2655069   | 0.08618927  |
| 0           | 0.1062882   | 0.174625308 | 0.2852411   | 0.1438287   | 0.1790859   |
| 0.186155    | 0.1064530   | 0.2614174   | 0.08550778  | 0.2302016   | 0           |
| 0           | 0.03609901  | 0.0462317   | 0.268595405 | 0.07464218  | 0           |
| 0.2122229   | 0           | 0.1891650   | 0           | 0.1963098   | 0.2367667   |
| 0           | 0           | 0.1108537   | 0.06884281  | 0           | 0.5891248   |
| 0.06713218  | 0           | 0           | 0.04893594  | 0           | 0.1297814   |
| 0           |             |             |             | 0.04097496  | 0.0282776   |

|             |             |             |             |             |             |             |             |            |
|-------------|-------------|-------------|-------------|-------------|-------------|-------------|-------------|------------|
| 0.1766574   | 0.1334032   | 0           | 0.04004725  | 0           | 0           | 0.04354897  | 0.100157471 | 0          |
| 0           | 0           | 0           | 0.04215532  | 0.09689946  | 0           | 0.046044004 | 0.4578452   | 0          |
| 0.04690967  | 0.1929005   | 0           | 0.04187518  | 0.1357617   | 0           | 0.04657167  | 0           | 0          |
| 0.02680288  | 0.1722050   | 0.07842009  | 0.06821508  | 0.059635576 | 0.0311305   |             |             |            |
| 0.1479169   | 0.1169660   | 0.05446454  | 0           | 0           | 0           | 0.0563818   | 0.4099188   | 0          |
| 0.03990891  | 0           | 0.03587527  | 0.120778727 | 2.2636270   | 0.073630224 | 0           | 0           |            |
| 0.06497659  | 0           | 0.2196024   | 0.1062582   | 0.04312721  | 0           | 0           | 0.0345637   |            |
| 0.04685681  | 0           | 0.04166992  | 0.0424117   | 0.07823135  | 0.1738578   | 0.08423891  |             |            |
| 0           | 0.1791710   | 0.171135719 | 0.0269219   | 0.09581021  | 0.03075078  | 0           | 0           |            |
| 0.1446906   | 0.1433618   | 0.2100680   | 0.1037221   | 0           | 0.06232047  | 0.229674    |             |            |
| 0.04985352  | 0.02627472  | 0           | 0.04140033  | 0           | 1.6300870   | 0.08005558  | 0           | 0.2309     |
| 0           | 0           | 0           | 0.048956101 | 0           | 0.1726562   | 0.034801513 | 0.1172517   | 0.07905887 |
| 0           | 0.1182212   | 0.04678239  | 0.0836511   | 0.075028659 | 0           | 0.09278343  | 0           |            |
| 0.1123154   | 0           | 0.1118433   | 0.03048856  | 0           | 0.3425302   | 0.353679131 |             |            |
| 0.1097210   | 0.1892437   | 0           | 0           | 0.1091130   | 0.03512208  | 0.1815520   | 0           | 0.04116877 |
| 0.1417566   | 0.3004798   | 0.08005907  | 0.04383162  | 0.1314987   | 0           | 0.04430143  |             |            |
| 0           | 0.076194652 | 0.2661611   | 0           | 0           | 0.1042767   | 0.04240211  | 0.03199714  |            |
| 0.069121609 | 0.07897788  | 0.04275267  | 0           | 0           | 0.319671439 | 0.09491144  |             |            |
| 0.1031103   | 0.2585795   | 0.02868417  | 0.03627753  | 0.02750776  | 0.0392501   |             |             |            |
| 0.08385817  | 0.1415887   | 0.1763054   | 0           | 0.1774061   | 0           | 0.129214191 | 0           |            |
| 0.1807613   | 0.038081467 | 0.040896107 | 0.03897591  | 0           | 0           | 0.3787028   |             |            |
| 0.08846356  | 0.09603973  | 0.05552557  | 0.03101968  | 0           | 0.103836511 | 0           |             |            |
| 0.1354147   | 0.03713325  | 0.5670950   | 0           | 0.1551272   | 0.1182301   | 0.1858502   |             |            |
| 0           | 0           | 0           | 0           | 0.038328339 | 0.3835228   | 0.05191017  | 0.02789929  | 0.1000646  |
| 0.04787546  | 0           | 0.05003654  | 0.07776177  | 0           | 0.281909936 | 0.1324366   |             |            |
| 0.04830888  | 0           | 0.0328125   | 0.03267471  | 0.03454784  | 0.04451082  | 0.1687885   |             |            |
| 0.3728663   | 0           | 0           | 0           | 0           | 0.033221803 | 0.05328343  | 0           | 0.07044617 |
| 0.07704907  | 0.4655016   | 0           | 0.2723438   | 0.0298772   | 0.1322572   | 0.08891259  |             |            |
| 0.116305951 | 0.144720054 | 0.03210932  | 0           | 0.2584331   | 0           | 0           | 0.1132103   | 0          |
| 0.03989962  | 0           | 0.07897385  | 0.04863977  | 0.08299926  | 0.1986427   | 0.1527125   |             |            |
| 0.02090347  | 0.08565731  | 0.08847961  | 0.03659591  | 0.107377109 | 0.07591369  | 0           |             |            |
| 0.1340018   | 0           | 0.04833555  | 0           | 0.4453361   | 0.1192581   | 0.1361310   |             |            |
| 0.08222561  | 0           | 0.1255220   | 0.06383477  | 0.1349576   | 0.2467416   | 0.0396472   |             |            |
| 0.131242553 | 0.02469253  | 0           | 0.0610158   | 0.04936631  | 0.05722389  | 0.05752109  |             |            |
| 1.04925309  | 0.2387151   | 0.1631178   | 0.07291459  | 0.1086733   | 0           | 0.06000102  |             |            |
| 0           | 0.04985093  | 0.101113456 | 0           | 0.2416439   | 0           | 0.1203663   | 0           | 0          |
| 0.04329599  | 0           | 0.1680540   | 0.09204573  | 0           | 0           | 0.263512763 | 0.0419699   |            |
| 0.5930609   | 0.04803071  | 0.08763184  | 0           | 0.1467589   | 0.1925289   | 0           |             |            |
| 0.1791832   | 0.09949789  | 0.06709503  | 0.03575231  | 0           | 0           | 0.04939469  |             |            |
| 0.07066939  | 0.03103218  | 0           | 0.04103541  | 0.02232507  | 0           | 0           | 0.09664638  | 0          |
| 0           | 0.2323169   | 0.05019436  | 0           | 0.06681489  | 0.09310644  | 0.03422817  | 0           |            |
| 0.05914254  | 0           | 0           | 0.6715330   | 0.2691556   | 0.07932663  | 0           | 0           | 0.07621107 |
| 0.1092442   | 0.02986377  | 0.04152073  | 0.04604943  | 0           | 0.03582627  | 0.058594794 |             |            |
| 0.0538118   | 0.0379960   | 0.1198074   | 0           | 0.05815714  | 0.102607263 | 0.433303957 | 0           |            |

|             |             |             |             |             |             |             |           |           |
|-------------|-------------|-------------|-------------|-------------|-------------|-------------|-----------|-----------|
| 0.143498884 | 0.0503766   | 0           | 3.4069540   | 0.2388548   | 0.0269613   | 0.04018549  |           |           |
| 0.2365650   | 0           | 0.2016195   | 0           | 0           | 0.08452894  | 0           | 0         | 0.1163218 |
| 0.09228148  | 0.02816362  | 0           | 0.04445185  | 0.1824717   |             |             |           |           |
| AC138393.3  | 0.1033612   | 0.1062371   | 0.0597874   | 0.055230646 | 0.081864367 |             |           |           |
| 0.1202949   | 0.04224817  | 0.0405424   | 0.09133732  | 0.06735009  | 0.3438225   |             |           |           |
| 0.088051384 | 0.2362156   | 0.03704406  | 0.094857177 | 0.1251080   | 0.1218382   |             |           |           |
| 0.04966281  | 0           | 0.5509178   | 0           | 0.3584182   | 0.4066362   | 0.2531580   | 0.3859548 |           |
| 0.2675258   | 0.3284826   | 0.7252492   | 0           | 0           | 0.2283324   | 1.007458341 |           |           |
| 0.06064285  | 0.4422601   | 0.2178457   | 0.056250347 | 0.7386059   | 0.2070763   |             |           |           |
| 0.7333358   | 0.08913533  | 0           | 0.03393324  | 0.1850040   | 0.7065811   | 0.05029723  |           |           |
| 0.2437621   | 0.03243902  | 0.3281646   | 0.1850654   | 0.1265319   | 0.07231547  |             |           |           |
| 0.2847045   | 0.4150587   | 0.377197056 | 0.04076902  | 0.4108720   | 0.8109181   |             |           |           |
| 0.1065962   | 0.6381864   | 0.04190675  | 0.7975517   | 0.1509635   | 0.08426884  |             |           |           |
| 0.2682457   | 0.3693682   | 0.14158386  | 0           | 0.9055316   | 0.3790483   | 0.155361116 |           |           |
| 0.2780927   | 0.09131887  | 0.1270337   | 0.477314805 | 0.4554481   | 0.1334654   |             |           |           |
| 0.3148594   | 0.2210403   | 0.3272239   | 0           | 0.1183906   | 0.1279429   | 0.2464086   |           |           |
| 0.1316686   | 0           | 0.1226031   | 0.1768148   | 0.2596599   | 0.1196919   | 0.1970767   |           |           |
| 0.06428646  | 0.0843016   | 0.05867529  | 0           | 0.2204595   | 0.568209917 | 0.3079671   |           |           |
| 0           | 0.1617197   | 0.1530962   | 0.1062694   | 0.03219257  | 0.2827324   | 0.03761049  |           |           |
| 0.0882133   | 0.1014275   | 0.455291537 | 5.4611490   | 0.104084609 | 0           | 0.2783322   |           |           |
| 0.2755552   | 0.1061157   | 0.2586939   | 0.1001386   | 0.2032172   | 0.2949601   |             |           |           |
| 0.1076135   | 0.2931581   | 0.5298990   | 0.1215329   | 0.1963504   | 0.3597222   |             |           |           |
| 0.5160812   | 0.1404386   | 0.07938745  | 0           | 0.04221307  | 0.483839204 | 0.05074285  |           |           |
| 0.2106821   | 0.08693937  | 0.2493316   | 0.332807507 | 0.1704470   | 0.1351054   |             |           |           |
| 0.06598993  | 0.03258287  | 0           | 0.1174627   | 0.0811675   | 0.2818942   | 0.1980921   |           |           |
| 0.5230878   | 0.03901602  | 0.1302656   | 6.8538490   | 0.07544505  | 0.1538808   | 0           |           |           |
| 0.1060903   | 0.1170693   | 0.04199269  | 0.138409919 | 0.1172766   | 0.3661036   |             |           |           |
| 0.065594475 | 0.1841650   | 0.07875003  | 0.1856877   | 0.1322644   | 0.157667    |             |           |           |
| 0.212122911 | 0.04454213  | 0.1748798   | 0.09055579  | 0.2116939   | 0.1529327   |             |           |           |
| 0.1756702   | 0.2154950   | 0.1088637   | 0.05869151  | 0.380925915 | 0.3619070   | 0.0445862   |           |           |
| 0.5737506   | 0.03503604  | 0.2827798   | 0.09929804  | 0.5475076   | 0.2350683   |             |           |           |
| 0.3944061   | 0.3879779   | 0.06679629  | 0.1166013   | 0.1508967   | 0.08261458  |             |           |           |
| 0.1239255   | 0           | 0.04175003  | 0.8977447   | 0.035903239 | 0.2926379   | 0.3959844   |           |           |
| 0.0441065   | 0.1637855   | 0.07992021  | 0.3618524   | 0.097711175 | 0.03721471  |             |           |           |
| 0.08058095  | 0.07754769  | 0.4429913   | 0.150630521 | 0.1565293   | 0.24293     |             |           |           |
| 0.4467604   | 0.1351610   | 0.1709412   | 0.3888532   | 0.2959170   | 0.3161146   | 0.1334343   |           |           |
| 0           | 0.5630701   | 0.2507835   | 0.1574629   | 0.243545072 | 0.401929366 | 0.3974855   |           |           |
| 0.251218054 | 0.038540834 | 0.07346245  | 0.088773779 | 0.1451129   | 0.3568927   |             |           |           |
| 0.3056856   | 0.362034584 | 0.5756053   | 0.2923321   | 0.5370340   | 0.048928199 |             |           |           |
| 0.1231347   | 0.1276160   | 0.4199362   | 0.3785582   | 0.1575391   | 0.7191972   | 0           |           |           |
| 0.4456841   | 0           | 0.1983354   | 0.1530998   | 0.339356049 | 0.3780171   | 0.28896758  |           |           |
| 0.1290840   | 0.1467617   | 0.1051701   | 0           | 0.1353547   | 0.1595429   | 0.2357743   |           |           |
| 0.03664167  | 0.3676507   | 0.2324650   | 0.2808210   | 0.09105338  | 0.1891713   | 0.4638416   |           |           |
| 0.1231717   | 0.1953491   | 0.2516842   | 0.1590677   | 0.1756962   | 0.698477    |             |           |           |

|             |             |             |             |             |             |             |
|-------------|-------------|-------------|-------------|-------------|-------------|-------------|
| 0.2912509   | 0.1904448   | 0           | 0.03710028  | 0.563553103 | 0.2008590   | 0.03319453  |
| 0.1210195   | 0.1316078   | 0.04114826  | 0.1466623   | 0.08446957  | 0.4154678   |             |
| 0.2513759   | 0.40189491  | 0.227308986 | 0.1210404   | 0           | 0           | 0.8940996   |
| 0.04140453  | 0.03556344  | 0.2323013   | 0.1128052   | 1.1159440   | 0.2232769   |             |
| 0.2291927   | 0.1303653   | 0.4011483   | 0.3597938   | 0.3545929   | 0.04036209  |             |
| 0.3057411   | 0.2069298   | 0.269848231 | 0.8227295   | 0.1520793   | 0           | 0.08446478  |
| 0.04555183  | 0.1123529   | 0.9442991   | 0           | 0.4810914   | 0.1841561   | 0.627292    |
| 0.167654278 | 0.0394310   | 0.3609505   | 0.1695803   | 0           | 0.03736385  | 0.593683592 |
| 0.4886795   | 0.1067986   | 0.2587581   | 0.1860929   | 0.0808924   | 0.1626251   |             |
| 0.068194821 | 0.1285526   | 0.6148945   | 0.2748613   | 0.3328476   | 0.224432655 |             |
| 0.4523637   | 0.05435795  | 0.04697993  | 0.285870505 | 0.075274646 | 0.07590907  |             |
| 0.1496739   | 0.07562282  | 0.3548043   | 0.5263961   | 0.1386892   | 0.1224075   |             |
| 0.1367826   | 0.2534008   | 0.2602340   | 0.09559799  | 0.1301463   | 0.155210397 |             |
| 0.07910556  | 7.2657730   | 0.2715872   | 0.2752833   | 0.1397068   | 0.5878041   |             |
| 0.1814408   | 0           | 0.5628791   | 0.1406515   | 0.5374628   | 0.03369328  | 0.1554105   |
| 0.06932147  | 0.1396499   | 0.06659943  | 0.3509399   | 0.0972627   | 0.5027375   |             |
| 0.3366293   | 0.2723882   | 0.03158133  | 0           | 0.1902276   | 0.2466575   | 0.1876606   |
| 0.09460717  | 0           | 0.3148346   | 0.2632329   | 0.2903122   | 0.3633366   | 0.2508139   |
| 0.0322910   | 0.1106279   | 0.2109528   | 0.6087707   | 0.4485485   | 0.2551456   |             |
| 0.1961807   | 0.1077329   | 0.2059054   | 0.2532948   | 0.7434601   | 0           | 0.3012567   |
| 0.1012889   | 0.165660675 | 0.2535635   | 0.1790387   | 0.1881791   | 0           | 0           |
| 0.193395889 | 0.10208732  | 0.1180675   | 0.360625467 | 0.1899013   | 0.0830777   |             |
| 0.6421484   | 0.2926284   | 0.05081711  | 0.03787114  | 0.1910921   | 0           | 0.05259853  |
| 0.1266719   | 0.3681791   | 0.215238601 | 0           | 1.2347420   | 0.08423868  | 0           |
| 0.3768563   | 0.5042909   | 0.1523129   | 0.08378358  | 0.3152652   |             |             |
| AC007619.1  | 0.3593808   | 0.7387605   | 0.08315092  | 0.15362699  | 0.265661792 |             |
| 0.3346067   | 0.4113044   | 0.4510834   | 0.1905447   | 0.2810068   | 0.136623    |             |
| 0.122459812 | 0.8395592   | 0.051520016 | 0.395775455 | 0.1739972   | 0.1129665   | 0           |
| 0.1197204   | 0.2786195   | 0.07629261  | 0.3738597   | 0.3393241   | 0.0391207   |             |
| 0.1951916   | 0.2790515   | 0.1903525   | 0.6724398   | 0.06034411  | 0           | 0.2268282   |
| 0.151475631 | 0.1265110   | 0.4731424   | 0.06059494  | 0.078231671 | 0.1467480   | 0.1439984   |
| 0.3708750   | 0           | 0           | 0.08576641  | 0.3620461   | 0.2098566   | 0.1937249   |
| 0.04511543  | 0.05705046  | 0.07353847  | 0.1759776   | 0           | 0.1218340   | 0.238453126 |
| 0.0567006   | 0.2380964   | 0.05370505  | 0.2594401   | 0.1543608   | 0           | 0.6932602   |
| 0.2624456   | 0.2343983   | 0           | 0.05707875  | 0.065637178 | 0           | 0.3250044   |
| 0.2635858   | 0.162054465 | 0.1105042   | 0           | 0.2650133   | 0.120697874 | 0.1666912   |
| 0           | 0.2189496   | 0.2459342   | 0.4045292   | 0           | 0.1097699   | 0.2669101   |
| 0.1142331   | 0.03052027  | 0           | 0           | 0.07025998  | 0.2257056   | 0           |
| 0.04470406  | 0.156326267 | 0.1632084   | 0.06462391  | 0.1533050   | 0.175611803 |             |
| 0.3569278   | 0.06024007  | 0           | 0.05323065  | 0           | 0.1790907   | 0.2621451   |
| 0.1046156   | 0.1226850   | 0.2821259   | 0.158302215 | 6.1711310   | 0           | 0.3225816   |
| 0.08516349  | 0.07379159  | 0.4677211   | 0.06963522  | 0.1130519   | 0           | 0.1995551   |
| 0.04530194  | 0.2456571   | 0.08451257  | 0.1638477   | 0.1667644   | 0.3759662   |             |
| 0.3255313   | 0.05520511  | 0           | 0.1761269   | 0.149536065 | 0.03528599  | 0.4185883   |

0.08060884 0.09907558 0 0.1422323 0.2505352 0.2753318 0  
0.1621896 0.08168217 0.07525724 0.1306840.1721887 0.05196417  
0.05426257 0 4.3552170.7344905 0.2140138 0.07565898 0.07377398 0  
0 0.19249729 0.2446583 0.1697228 0.045613634 0 0.1036208  
0.1095237 0.1033001 0.1226335 0 0.442523403 0.06194815 0.06080468  
0.1889143 0.2576165 0.1595215 0.1954544 0.1198822 0 0.2040670  
0.07190454 0 0.0797959 0.09745461 0.3575305 0.0920676 0.1427739  
0.1307710.09142181 0.05395907 0 0.4633326 0 0.05744922 0.08617632  
0.1386435 0 0.1248562 0.049933388 0.4651360.1376815 0.1226846  
0.2277890.2223023 0.08387599 0 0.05175735 0.05603505 0.1078515  
0.07701274 0 0.3109962 0.2027168 0.3954007 0.1879788 0.1901929  
0.07210773 0.05144431 0.0549556 0.3711547 0.4621599 0.3011941  
0.1550151 0.2189957 0.254037609 0.335396398 0.1579467 0.099825205  
0.214406777 0 0.185196754 0.05045491 0.2836332 0.1545965 0.062938658  
0.7277623 0.1626275 0.04149413 0.068048199 0.4281322 0.1774853  
0.04866979 0.18582 0.0730339 0 0 0.5036257 0.08119669 0.1970287  
0.2129276 0 0.3504916 0.150708516 0.3590539 0.3061692 0.03656703  
0 0.06274939 0.2662663 0.06558188 0.05096038 0.3976934 0.138560102  
0.08679095 0.1899524 0.05846557 0.2580401 0 0 0.2916971  
0.05530693 0.1745387 0.5464269 0.05786642 0.1589197 0 0.05159821  
0.130629421 0.1745938 0.1025247 0.09233236 0.1009866 0.3050618  
0.05722805 0.1529809 0.1174783 0.1155646 0.1748039 0.101626559 0  
0.2525102 0.1863762 0.05645384 0.3108732 0.1151689 0 0.1615396  
0.05229562 0.3104059 0.1035094 0.1912535 0.1813091 0.2603569  
0.2001572 0.2465798 0 0.7344667 0.09593103 0.093824658 0.4477434  
0.05287707 0.1053801 0 0 0.1562577 0 0 0.3122423 0.1920899  
0.5029334 0.194308053 0 0 0.1768862 0.04619989 0 0.206420327  
0.0970920.1856662 0.03998608 0.2588137 0.07500218 0 0 0.223485  
0.5344881 0.04778383 0.1068269 0.11705089 0 0 0 0.198791019  
0.157035335 0.1319657 0.1387753 0 0.05482817 0.2815767 0  
0.05674717 0.04755852 0 0.06032123 0.06647773 0.09050225 0 0  
9.1334260.06295287 0.1531430.04857525 0.1442655 0.1514062 0  
0.1565678 0.1956148 0.2638203 0.04685982 0.5763770 0.3884436  
0.1234999 0.1220197 0.06763535 0.2151371 0.2048271 0.2525541  
0.08784516 0 0.1058256 0.3430455 0 0.1315774 0 0 0.04067757  
0.2691730.25266 0.1162754 0 0 0.4400823 0.4233321 0.1559577  
0.04435632 0 0.1997766 0.04772807 0.03914184 0.2721018 0  
0.2094904 0 0.153598004 0.03526502 0 0.1046861 0.07702878  
0.2286761 0.044828416 0.141980666 0 0 0 0.1733138 0 0.06261242  
0.1413505 0.0526703 0.2657665 0.0699562 0.1706899 0 0.0931009  
0.085528237 0 0.6093470.05857859 0.07846131 0.6098427 0.1612686  
0.1845674 0.4236664 0 0.3986031  
AL354993.2 0.1092730 0.8848976 0.058389594 0.057697764 0.7206597  
0.08932915 0.04286125 0 0.02373407 0.1038536 0.139631299 1.054399

0.156651267 0 0.4849664 0.6440342 0.2100132 0.3336857 0.5559539  
0.231974578 1.4683080.8311283 0.08921252 0.7789657 0.3535339  
1.2443850.4543587 0.4587043 0.075799031 0.1724229 1.007508579  
0.1923341 0.3596580.1842444 0.356805704 3.0490370.7662204 2.466798  
0.1884670.2261996 0.07174815 2.0862441.9264590.9039581 1.141261  
0.06858878 1.1709031.0341520 0.2293548 0.4399060.2437768 0.326267229  
0.5603107 2.6786280.4898851 0.1126930.4986823 0.3987327 0.8958661  
0.3590953 0.4899875 0.3308529 0.1301648 2.394909279 0.4119639  
0.4632213 1.3224030.123185313 0.04199976 0.5792514 1.6115940.0458741  
0.4054717 0.5173630.7489529 0.4673657 0.3075019 0.6765113  
1.9608710.6086732 0.08683401 0.9975960.053057336 0.2073848 0.2136318  
0.6176503 0.3796133 0.3125229 0.1699084 0.534739666 0 0.02456185  
0.9711201 0.533963563 1.6279070.1373740.5698978 0.2832421 0.1685213  
0.5105077 0.7970759 0.3180932 0.2486899 0.8578292 0.150416312  
11.095950.293434102 0.3001874 0.8827548 0.1618420.44874 1.996477  
0.2646652 0.1289042 0.08909442 0.8343024 0.3443616 0.8403103  
0.7066623 0.6227423 1.3099111.3769871.33624 1.4267770.3451577  
0.4909022 0.852521107 0.2414030.3500078 0.2144611 0.07531206  
0.070368524 0.4685092 0.5237203 0.3488213 0.3100182 0.328768  
0.0620905 0.2860331 0.3476869 0.7067997 0.6715074 0.5774658  
0.02754323 0.7495716 0.1595203 0.3253642 0 0.4486329 0  
0.04439449 0.731631765 1.1158590.2580287 0.069346189 0.6230349  
0.3150685 0.2913896 0.4711398 1.1186340 0.074751801 0.8476153  
0.09244106 0.6701462 1.0630590.4850395 0.6314402 0.3037605  
0.4603609 0.0930726 0.100678298 0.2186323 0.1414090.5459099  
0.2222397 0.1630656 0.4549023 2.2067611.2922690.1042411 0.3691517  
0.1412335 0.3169810.4387001 0.4803687 0.5895605 0.5269475  
0.2206898 0.9490918 0 0.9281264 1.3605570.2331460.3116759  
0.5491934 0.4781860.103299821 0.1180297 0.04259491 0.3006046 0 0  
0.1182015 0.7704736 1.58869 2.4863141.7348961.09625 0.03910527  
0.2506462 0.7993751 0 0.4121136 1.1783430.8323453 0.064368693 0  
1.1405970.265586615 0.203725996 0.6989776 0 0.1534127 0.5390077  
0.5288227 0.09568534 0.4978861 0.1854313 0.4415833 0.879353479  
0.2603549 0.7420328 0 0 0.4996489 0.6402796 0.3863869  
1.8552520 0.8986254 0.5664974 0.119588571 0.5328507 0.420055963  
0.6004547 0.2327338 0.7505013 0.8474103 0.5723856 0.6409386  
0.5483710.03873741 0.6046113 0.210652259 0.7587002 0.2406531  
0.5555308 3.3999080.2929872 0.8260886 0.9312781 0.2102071  
0.2653503 0.3692134 0.3958832 0.4832096 0 0.1961113 0.496488204  
0.6370417 0.1558677 0.03509311 0.2047060 0.1305053 0.3876269  
0.1786017 0.8784614 0 0.193127963 0.288372064 1.9834320.07083672 0  
0.4332341 0.2626361 0.15039 0.5525728 0.03975239 1.0617940.3934122  
0.9692058 0.5237223 0.6220019 0.5325214 0.8122271 0 0.3819968  
0.07292174 0.071320589 0.5672517 0.08038876 0.08010441 0.08929579

|             |             |             |             |             |             |             |
|-------------|-------------|-------------|-------------|-------------|-------------|-------------|
| 0.1926288   | 0.1979649   | 3.9932351   | 0.0099530   | 5086077     | 0.5353945   | 0.4369184   |
| 0.50218952  | 0.04168628  | 1.1447860   | 0.9860373   | 0.03511874  | 0.0395009   |             |
| 0.235364874 | 0.5658326   | 0.3387209   | 1.3069990   | 0.1967366   | 0.2850636   |             |
| 0.9742502   | 0.144190525 | 0           | 1.3407560   | 0.5448415   | 0.1624085   | 0.26692786  |
| 0.05977961  | 0.1149340   | 0.1490009   | 0.604442064 | 0.119370033 | 0.2808775   |             |
| 0.3955864   | 0.1598962   | 0.2917425   | 0.7705435   | 0.07331079  | 0.7333158   |             |
| 0.72303     | 0.5692751   | 0.3209713   | 0.2273980   | 0.5847581   | 0.459445685 | 0.08363005  |
| 5.6132890   | 0.6220951   | 0.5529537   | 0.4061680   | 0.5117609   | 0.5754553   | 0.0600456   |
| 0.8331026   | 0.9417420   | 0.6684745   | 0.1424815   | 0.1369161   | 1.4657270   | 0.8858235   |
| 0.3285736   | 0.9275301   | 0.05141285  | 3.0254151   | 1.1121341   | 1.2958542   | 2.236972    |
| 0.3370141   | 0.3217724   | 0.3042260   | 0.2645253   | 0.3500640   | 0.2354736   | 0.06656835  |
| 0.7111821   | 0.46638     | 0.3361031   | 0.3535458   | 0.3413790   | 0.2923882   | 0.05575458  |
| 0.5363248   | 0.1975848   | 0           | 0.1555511   | 0.5945270   | 0.1451215   | 0.6843322   |
| 1.1996580   | 0.5505541   | 1.0748950   | 0.5354110   | 0.642164351 | 0.3484860   | 0.9151339   |
| 0.2342130   | 0.2607414   | 0.034076213 | 0.143901683 | 0.1248205   | 1.239067853 |             |
| 0.4517164   | 1.3613550   | 0.7615149   | 0.2417563   | 0.1601488   | 0.6060653   |             |
| 0.2658852   | 0.3521773   | 0.1004377   | 0.9554008   | 0.29256338  | 0.1010331   | 1.13693     |
| 0.04452838  | 0.8349904   | 2.2888790   | 0.09194096  | 0.8979101   | 0.8051225   |             |
| 0.1771513   | 0.2726975   |             |             |             |             |             |
| AC034236.2  | 0.8276919   | 0.6427675   | 0.5319593   | 0.570042012 | 0.223372772 |             |
| 0.3853173   | 1.6990850   | 0.9234602   | 0.5526191   | 0.2956293   | 0.4719856   |             |
| 0.407388047 | 0.8967391   | 0.028352322 | 0.962152254 | 0.2374722   | 0.0669371   | 1.573077    |
| 0.3267897   | 1.8448590   | 0.507606484 | 0.7813127   | 0.7814992   | 0.1501652   |             |
| 0.9115811   | 0.5950788   | 1.1593291   | 0.3383830   | 0.9574099   | 0.625177224 | 0.7545911   |
| 1.143499887 | 2.8705161   | 0.2592050   | 0.7443016   | 1.811767764 | 0.7510579   | 1.289725    |
| 0.9253447   | 1.7130590   | 0.7919515   | 0.7970729   | 1.5802331   | 0.29707     | 0.5907269   |
| 1.5615911   | 1.1660520   | 0.4525767   | 0.6304211   | 0.5178768   | 1.0294850   | 0.8807611   |
| 0.5416387   | 0.61020303  | 1.9152831   | 0.2795091   | 0.5942060   | 0.6544244   | 1.007276    |
| 1.0887691   | 0.3128020   | 0.5104159   | 0.2849176   | 0.5250785   | 2.5999550   | 0.772643351 |
| 0.6009726   | 1.7361491   | 0.3220540   | 0.373228544 | 0.5514230   | 0.6500088   | 1.096376    |
| 0.679506543 | 1.4588480   | 0.6966727   | 0.5602933   | 0.6922818   | 1.7210082   | 2.224892    |
| 0.9410211   | 1.2977471   | 0.0085150   | 0.7419648   | 0.107169227 | 0.2967148   | 0.6472646   |
| 0.5544787   | 1.0223622   | 0.6477740   | 0.7092673   | 1.120111688 | 0.3445624   | 0.4961189   |
| 1.5169261   | 0.797566778 | 0.7855073   | 0.81702     | 0.4412638   | 3.5416570   | 0.6713287   |
| 0.9967901   | 2.0124931   | 0.1779330   | 0.3348818   | 0.5896022   | 0.891211974 | 1.062921    |
| 0.703831766 | 0.6467639   | 1.3703110   | 0.5666281   | 0.6609164   | 0.0878780   | 0.2851152   |
| 0.9836219   | 1.2447211   | 0.1489910   | 0.6607893   | 2.1845170   | 0.6920582   | 0.4192874   |
| 0.7397021   | 1.0495631   | 0.6160910   | 0.66397     | 3.2147540   | 0.8413248   | 1.281923457 |
| 1.6072880   | 0.6319903   | 0.2681621   | 0.3929793   | 0.663299831 | 0.5823572   |             |
| 0.7693454   | 1.8084110   | 0.8117384   | 0.4565485   | 1.2123461   | 0.9739830   | 0.4681896   |
| 0.4670699   | 1.7419940   | 0.2221732   | 0.4450713   | 0.8201058   | 2.0540972   | 1.149576    |
| 0.8712531   | 1.1704860   | 0.6388637   | 1.3600150   | 0.426921525 | 0.9391232   | 1.6649      |
| 0.87544179  | 1.1798      | 1.1932491   | 0.63959     | 0.5419084   | 2.05552     | 1.2064460   |
| 0.6658080   | 0.6068382   | 1.2085821   | 0.5821820   | 0.9661122   | 0.8127745   | 0.7413833   |



|                                   |                                                   |                                           |                          |                     |                  |           |            |                     |   |   |   |   |   |   |   |
|-----------------------------------|---------------------------------------------------|-------------------------------------------|--------------------------|---------------------|------------------|-----------|------------|---------------------|---|---|---|---|---|---|---|
| 1.4077230.5326528                 | 0.457554723                                       | 1.76644                                   | 0.5712572                | 1.09246             | 0.1496322        |           |            |                     |   |   |   |   |   |   |   |
| 0.7593859                         | 0.8599457                                         | 1.8633321.3553080.6316623                 | 0.8284896                | 0.8677087           |                  |           |            |                     |   |   |   |   |   |   |   |
| 1.1145310.8592675                 | 0.8526748                                         | 0.6395246                                 | 1.8981241.2778621.59754  |                     |                  |           |            |                     |   |   |   |   |   |   |   |
| 0.293893658                       | 1.8003073.0535070.6906913                         | 1.5388910.9528623                         | 0.7941649                |                     |                  |           |            |                     |   |   |   |   |   |   |   |
| 0.463672905                       | 0.9801106                                         | 1.6490320.7175811                         | 0.2956141                | 0.830947188         |                  |           |            |                     |   |   |   |   |   |   |   |
| 0.6764651                         | 1.2450092.7174940.9043532                         | 0.8395657                                 | 0.4244055                | 0.4081036           |                  |           |            |                     |   |   |   |   |   |   |   |
| 0.5554953                         | 0.9814469                                         | 0.4927792                                 | 0.5241152                | 0.9421256           | 2.521851         |           |            |                     |   |   |   |   |   |   |   |
| 0.541736516                       | 0.438677193                                       | 2.3038640.702496627                       | 0.397784498              | 1.0981040.458122323 |                  |           |            |                     |   |   |   |   |   |   |   |
| 1.2265871.2157471.17695           | 1.578392081                                       | 2.7004050.6970758                         | 3.1748940.835851666      |                     |                  |           |            |                     |   |   |   |   |   |   |   |
| 0.5916201                         | 1.4079771.8931040.2932339                         | 0.4485461                                 | 0.7409447                | 0.2081209           |                  |           |            |                     |   |   |   |   |   |   |   |
| 0.6146495                         | 0.4155657                                         | 0.3226865                                 | 1.2895560.993055569      | 2.8925350.385664029 |                  |           |            |                     |   |   |   |   |   |   |   |
| 2.1500420.6529074                 | 0.87025                                           | 2.6849620.6262467                         | 0.5451017                | 1.426508            |                  |           |            |                     |   |   |   |   |   |   |   |
| 1.9561190.6106199                 | 1.264654977                                       | 1.0771780.4536834                         | 0.5460902                | 1.474728            |                  |           |            |                     |   |   |   |   |   |   |   |
| 1.4356581.9466960.6270220.7076538 | 0.5717062                                         | 1.3361630.4738577                         |                          |                     |                  |           |            |                     |   |   |   |   |   |   |   |
| 0.6777941                         | 1.2594781.3336052.039117143                       | 0.6433726                                 | 0.6821392                | 1.039628            |                  |           |            |                     |   |   |   |   |   |   |   |
| 0.3014964                         | 1.0148510.3807621.2788321.2926992.5137090.9542916 | 0.455110244                               |                          |                     |                  |           |            |                     |   |   |   |   |   |   |   |
| 0.695734919                       | 1.3785071.2161921.1557261.7103820.5894359         | 1.3163330.9025484                         |                          |                     |                  |           |            |                     |   |   |   |   |   |   |   |
| 0.7092715                         | 0.3839265                                         | 1.3244060.8972679                         | 1.0485740.7328805        | 0.6402543           |                  |           |            |                     |   |   |   |   |   |   |   |
| 0.2594108                         | 0.4740414                                         | 0.7122334                                 | 0.7610131                | 0.576234919         | 2.877176         |           |            |                     |   |   |   |   |   |   |   |
| 0.8389391                         | 0.5483255                                         | 0.7966183                                 | 0.6160531                | 1.3728680.3734185   |                  |           |            |                     |   |   |   |   |   |   |   |
| 0.4799954                         | 0.9245919                                         | 1.2780541.1031510.477346093               | 1.75419                  | 0.9634689           |                  |           |            |                     |   |   |   |   |   |   |   |
| 0.7845984                         | 1.1113230.5452105                                 | 0.607465533                               | 0.4058164                | 1.14029             | 1.852076         |           |            |                     |   |   |   |   |   |   |   |
| 0.5795176                         | 1.3243240.5980764                                 | 0.691711504                               | 0.5833375                | 1.1078841.369526    |                  |           |            |                     |   |   |   |   |   |   |   |
| 0.4920674                         | 0.339471816                                       | 2.2137020.8125332                         | 1.1035321.390467034      | 0.388459252         |                  |           |            |                     |   |   |   |   |   |   |   |
| 0.4525194                         | 1.2695780.2825992                                 | 1.2627512.3922480.7897531.0600790.8397477 |                          |                     |                  |           |            |                     |   |   |   |   |   |   |   |
| 0.6425716                         | 0.5248322                                         | 1.0121960.4284523                         | 0.905927418              | 0.6475355           |                  |           |            |                     |   |   |   |   |   |   |   |
| 0.6216089                         | 1.6270780.4212860.6090915                         | 1.1198340.8007287                         | 0.6468515                |                     |                  |           |            |                     |   |   |   |   |   |   |   |
| 1.9231590.4838935                 | 4.2194861.1751630.6729469                         | 1.6036510.8449252                         |                          |                     |                  |           |            |                     |   |   |   |   |   |   |   |
| 0.5372630.7181733                 | 0.7615488                                         | 3.37204                                   | 1.14565                  | 1.43799             | 1.3600181.150752 |           |            |                     |   |   |   |   |   |   |   |
| 1.2998811.0680570.4007312         | 1.4478420.7927125                                 | 1.0532681.6655061.308749                  |                          |                     |                  |           |            |                     |   |   |   |   |   |   |   |
| 1.8588560.2578762                 | 0.4826803                                         | 0.6201173                                 | 1.0886341.6069091.995483 |                     |                  |           |            |                     |   |   |   |   |   |   |   |
| 0.9194156                         | 0.3141937                                         | 0.7540636                                 | 0.8427414                | 0.9215107           | 3.760076         |           |            |                     |   |   |   |   |   |   |   |
| 13.344612.4660010.6128295         | 0.668199021                                       | 0.7309715                                 | 1.4910481.928825         |                     |                  |           |            |                     |   |   |   |   |   |   |   |
| 2.6413690.3803694                 | 0.401506682                                       | 0.423884306                               | 0.3921895                | 0.304823716         |                  |           |            |                     |   |   |   |   |   |   |   |
| 1.0813760.6504829                 | 0                                                 | 1.5862330.4792748                         | 0.6065263                | 1.0314821.718576    |                  |           |            |                     |   |   |   |   |   |   |   |
| 2.1902230.7438631                 | 1.3460890.251697384                               | 2.7720081.5309711.9037681.566107          |                          |                     |                  |           |            |                     |   |   |   |   |   |   |   |
| 1.0046311.7848730.3589549         | 0.9621964                                         | 1.1927451.621844                          |                          |                     |                  |           |            |                     |   |   |   |   |   |   |   |
| AC019183.1                        | 0                                                 | 0                                         | 0.1356760                | 0                   | 0                | 0         | 0          | 0                   | 0 | 0 | 0 | 0 | 0 | 0 | 0 |
| 0                                 | 0                                                 | 0                                         | 0.02841367               | 0                   | 0.3558454        | 0.3383535 | 0          | 0.1194341           | 0 |   |   |   |   |   |   |
| 0.1863569                         | 0.06095604                                        | 0.1476937                                 | 0                        | 0                   | 0                | 0         | 0          | 0.04943587          | 0 |   |   |   |   |   |   |
| 0.2793539                         | 0                                                 | 0.07564382                                | 0                        | 0                   | 0.07700494       | 0.0699718 | 0.04219604 | 0                   |   |   |   |   |   |   |   |
| 0.1185366                         | 0                                                 | 0.04654414                                | 0.08999361               | 0.2871396           | 0                | 0         | 0          | 0                   | 0 | 0 |   |   |   |   |   |
| 0.04381481                        | 0.1814246                                         | 0.06296699                                | 0.04754964               | 0.1696772           | 0                | 0         | 0          |                     |   |   |   |   |   |   |   |
| 0.04656722                        | 0.053549539                                       | 0                                         | 0                        | 0                   | 0                | 0         | 0.1036153  | 0.1801740.295411035 |   |   |   |   |   |   |   |

|             |             |             |                    |             |             |             |             |            |             |             |
|-------------|-------------|-------------|--------------------|-------------|-------------|-------------|-------------|------------|-------------|-------------|
| 0.02719872  | 0.2523949   | 0           | 0.4514475          | 0           | 0           | 0.04477742  | 0           | 0          | 0           | 0           |
| 0           | 0           | 0           | 0                  | 0.2515654   | 0.2553      | 0.031884367 | 0           | 0.1581686  | 0           | 0           |
| 0.04914636  | 0           | 0.04342778  | 0                  | 0.07305483  | 0.1069344   | 0           | 0           | 0.07672334 | 0           | 0           |
| 0           | 9.97251     | 0.039366654 | 0                  | 0.0526351   | 0           | 0           | 0           | 0.09223246 | 0           | 0           |
| 0.3695921   | 0.1503129   | 0.1378977   | 0                  | 0           | 0           | 0.5311639   | 0           | 0          | 0           | 0           |
| 0.04789721  | 0           | 0           | 0.06830035         | 0.09864606  | 0           | 0           | 0           | 0.05109926 | 0           | 0           |
| 0.07487571  | 0.2218216   | 0           | 0.3331985          | 0.03069899  | 0           | 0           | 0           | 0.04426966 | 0           | 0           |
| 0.05912251  | 9.9220520   | 0           | 0                  | 0.1805636   | 0           | 0           | 0           | 0          | 0.148853997 | 0           |
| 0.1253781   | 0           | 0           | 0                  | 0.5502721   | 0           | 0           | 0.05053988  | 0.2480349  | 0           | 0           |
| 0.1027494   | 0           | 0.08676283  | 0.03986495         | 0           | 0           | 0.06659452  | 0.108054727 | 0          | 0           | 0           |
| 0.3035393   | 0           | 0           | 0                  | 0.1126689   | 0.03882696  | 0           | 0.1118786   | 0          | 0           | 0           |
| 0.1712154   | 0.04686946  | 0           | 0                  | 0           | 0.1527944   | 0           | 0.2371733   | 0          | 0           | 0           |
| 0.1501368   | 0           | 0           | 0                  | 0.036956108 | 0.1689032   | 0.04571573  | 0           | 0          | 0           | 0           |
| 0.0761171   | 0.2205131   | 0.09216696  | 0.1840331          | 0.2715427   | 0.1764854   | 0           | 0           | 0          | 0           | 0           |
| 0.08394082  | 0           | 0           | 0                  | 0.1474360   | 0           | 0           | 0.121613479 | 0          | 0           | 0           |
| 0           | 0           | 0           | 0                  | 0.05937387  | 0           | 0           | 0           | 0.1397152  | 0           | 0           |
| 0.1787523   | 0.04294945  | 0           | 0.2212424          | 0           | 0           | 0           | 0.085567004 | 0.0714864  | 0           | 0           |
| 0           | 0.02929311  | 0.2497856   | 0.4176607          | 0.1069997   | 0.7167099   | 0.07241037  | 0           | 0          | 0           | 0           |
| 0           | 0.0415756   | 0.09270136  | 0.113043093        | 0.07080767  | 0.5682272   | 0.02384932  | 0           | 0          | 0           | 0           |
| 0.03508664  | 0.03493929  | 0           | 0                  | 0.09024338  | 0           | 0           | 0           | 0          | 0           | 0           |
| 0.1139527   | 0           | 0.3013143   | 0                  | 0           | 0           | 0.2080137   | 0           | 0.4714119  | 0           | 0           |
| 0.09507485  | 0.041455587 | 0           | 0                  | 0.3041069   | 0.04605739  | 0           | 0.09395959  | 0          | 0           | 0           |
| 0           | 0           | 0           | 0                  | 0.05201085  | 0           | 0           | 0           | 0.1117611  | 0           | 0           |
| 0           | 0           | 0           | 0                  | 0           | 0           | 3.8096080   | 0.1091744   | 0          | 0.3223895   | 0.253639343 |
| 0           | 0           | 0.09620742  | 0.1884590.08479004 | 0           | 0           | 0.03029484  | 0           | 0.1055755  | 0           | 0           |
| 0.1223798   | 0           | 0           | 0.07293134         | 0.04360576  | 0.07796808  | 0           | 0.031831661 | 0          | 0           | 0           |
| 0.5774355   | 0           | 0           | 0                  | 0.042705319 | 0.4306524   | 0           | 0           | 0.0447311  | 0           | 0           |
| 0           | 0           | 0.03594026  | 0.1476377          | 0.1627059   | 0           | 0.105666009 | 0           | 0          | 0           | 0           |
| 0           | 0           | 0.4117449   | 0.06444499         | 0           | 0.05319689  | 0           | 0           | 0.05877904 | 0           | 0           |
| 0           | 0.06636585  | 0.3310784   | 0                  | 0.1193617   | 0.1030221   | 0           | 0.1033446   | 0          | 0           | 0           |
| 0.09329025  | 0.3193947   | 0           | 0.1516357          | 0           | 0           | 0.07320083  | 0           | 0.06324153 | 0           | 0           |
| 0           | 0           | 0           | 0                  | 0           | 0.05564928  | 0           | 0.3893854   | 0          | 0.0887968   | 0           |
| 0.1969639   | 0           | 0.1149278   | 0                  | 0.02877067  | 0.1625175   | 0.2562217   | 0           | 0          | 0           | 0           |
| 0.03109392  | 0           | 0           | 0                  | 0.102296234 | 0           | 0.0471322   | 0           | 0          | 0.08594125  | 0           |
| 0.1806861   | 0           | 0           | 0                  | 0           | 0           | 0           | 0           | 0.03109594 | 0.09867723  | 0           |
| 0.04320558  | 0.1901307   | 0.1625985   | 0                  | 0           | 0           | 0           | 0           | 0          | 0           | 0           |
| AL031429.2  | 0.3422147   | 0.5158802   | 0.1319653          | 0.487629584 | 0           | 0.07080533  | 0           | 0          | 0           | 0           |
| 0.4103085   | 0.3579475   | 0.9273764   | 0.9712319          | 0.08673137  | 0.116610422 | 0           | 0           | 0          | 0           | 0           |
| 0.130824324 | 0.711867305 | 0.1840957   | 0.07171373         | 0.5700127   | 0           | 0           | 0           | 0          | 0           | 0           |
| 0.048432289 | 0           | 0.07180355  | 0                  | 0           | 0.08857413  | 0           | 0           | 0.07661563 | 0           | 0           |
| 0.126604236 | 0.2303931   | 0           | 0                  | 0           | 0.03846705  | 0           | 0.1242119   | 0.04570674 | 0           | 0           |
| 0           | 0.1573946   | 0           | 0                  | 0.1088929   | 0.3283359   | 0           | 0           | 0          | 0.1810847   | 0           |
| 0           | 0.03192355  | 0           | 0                  | 0.030275096 | 0           | 0           | 0.03409319  | 0          | 0           | 0.07399867  |
| 0           | 0.1666064   | 0.07440068  | 0.1184166          | 0           | 0.041667977 | 0           | 0           | 0          | 0           | 0           |

|             |             |             |             |             |             |             |             |             |           |
|-------------|-------------|-------------|-------------|-------------|-------------|-------------|-------------|-------------|-----------|
| 0.10287587  | 0           | 0.2418754   | 0           | 0.268176171 | 0           | 0.1178362   | 0.03474854  |             |           |
| 0.03903116  | 0.03210055  | 0           | 0.06968443  | 0           | 0.1450356   | 0.03874992  | 0           |             |           |
| 0.3896852   | 0.02230132  | 0.1432830   | 0.07045041  | 1.5442350   | 0           | 0           | 0           |             |           |
| 0.0324405   | 0           | 0           | 0.09518787  | 0           | 0.02345622  | 1.4495590   | 0.1664157   | 0           |           |
| 0           | 0.1194      | 0.025123464 | 0           | 0           | 0           | 0.08109558  | 0           | 0           | 0.2153038 |
| 0           | 0           | 0.2300696   | 0.03898718  | 0           | 0           | 0.03528862  | 0           | 0.02066547  |           |
| 0.1051364   | 0           | 0.4845072   | 0.284786712 | 0           | 0           | 0           | 0.06289544  | 0.058766934 |           |
| 0           | 0.1590455   | 0           | 0           | 0.06864109  | 0.0518537   | 0           | 0.1244418   | 0           | 0         |
| 0.02300221  | 2.6082940   | 0           | 0           | 0.0234167   | 0.06890671  | 0.03707521  | 0           |             |           |
| 0.05177156  | 0           | 0.028956575 | 0           | 0           | 0.06952814  | 0.1311545   | 0.07785052  |             |           |
| 0.06960184  | 0           | 0.0393261   | 0.6176031   | 0           | 0           | 0           | 0.1550986   | 0.1395239   |           |
| 0.06407694  | 0.3109113   | 0           | 0           | 0.15746     | 0.05065626  | 0           | 0           | 0.02922331  | 0         |
| 0           | 0.05803665  | 0           | 0.1179485   | 0.07353352  | 0.1332262   | 0.03647007  |             |             |           |
| 0.8206004   | 0           | 0           | 0.0396308   | 0           | 0.07381973  | 0           | 0.2336489   | 0           |           |
| 0.2469645   | 0.02662319  | 0           | 0           | 0           | 0.04888945  | 0.997433997 | 0.1184565   |             |           |
| 0.3431714   | 0.1792924   | 0.04773329  | 0           | 0.02288781  | 0.06531604  | 0           | 0           |             |           |
| 0.2933897   | 0           | 0           | 0           | 0           | 0.1002682   | 0           | 0           | 0.2918689   | 0         |
| 0.8102556   | 0.02453535  | 0           | 0           | 0           | 0           | 0.172794194 | 0.2174304   | 0           |           |
| 0.03089669  | 0.01966046  | 0           | 0           | 0.06453673  | 0.02459331  | 1.49482     | 0.3252036   |             |           |
| 0.02252855  | 0.133162826 | 0.05562501  | 0.031891068 | 0.02279356  | 0.1295755   |             |             |             |           |
| 0.02321359  | 0           | 0           | 0.1248986   | 0.2911573   | 0           | 0.029320371 | 0           | 0           | 0         |
| 0           | 0.02718697  | 0           | 0.0740704   | 0.0351101   | 0.04432045  | 0           | 0           | 0.1008858   |           |
| 0.2840398   | 0.2620457   | 0.082926535 | 0.06650166  | 0.26034     | 1.1722940   | 0.08547816  |             |             |           |
| 0.2323922   | 0           | 0.03237193  | 0           | 0.1100445   | 0           | 0           | 0           | 0.1068661   | 0         |
| 1.0034690   | 0           | 0.4081850   | 0.03418301  | 0.03319845  | 0.1313685   | 0.06571014  |             |             |           |
| 0.1618828   | 0           | 0.0236115   | 0.06353216  | 0           | 0.2138133   | 0           | 0           | 0           | 0         |
| 0.03356757  | 0.3344884   | 0           | 0           | 0           | 0.3473002   | 0           | 0           | 0.02280525  | 0         |
| 0.4177621   | 0           | 0           | 0.02932874  | 0.09896527  | 0.04368011  | 0.4109081   | 0           | 0           |           |
| 0           | 0           | 0.04786038  | 0.210731453 | 0.2837467   | 0           | 0.5763511   | 0.2034485   |             |           |
| 0.049537716 | 0.09984761  | 0           | 0.4562627   | 0.210328453 | 0           | 0.01675497  |             |             |           |
| 0.04404886  | 0           | 0.03480618  | 0           | 0.06122411  | 0           | 0.1509562   | 0.08389752  |             |           |
| 0.03829329  | 0.02110079  | 0           | 0           | 0           | 0.06168199  | 0.1598557   | 0           | 0           |           |
| 0.06105533  | 0           | 0           | 0.04969642  | 0           | 0           | 0           | 0           | 0.08219763  | 0         |
| 0.02582031  | 0           | 0           | 0.2004089   | 0.02788306  | 0           | 0           | 0.03629551  | 0           | 0         |
| 0.03933027  | 0           | 0.02582305  | 0           | 0           | 0.09841903  | 0           | 0           | 0.3724990   | 0         |
| 0.0281584   | 0           | 0.03170569  | 1.06046     | 0.09939253  | 0.03454729  | 0           | 0           |             |           |
| 0.05961844  | 0           | 0.06716111  | 0.1580727   | 0           | 0           | 0.1209740   | 0.056916202 |             |           |
| 0.270397693 | 0.1389886   | 0           | 0           | 0           | 1.1339010   | 0.05962169  | 0.1570319   | 0           |           |
| 0.02811911  | 0.1776392   | 0           | 0.05591911  | 0           | 0.027147638 | 0           | 0           | 0           |           |
| 0.2988542   | 0           | 0           | 0.04686703  | 0           | 0.2219168   | 0.05060847  |             |             |           |
| AC131097.3  | 0.0259308   | 0.9061783   | 0.02999841  | 0.498816883 | 0.136918512 |             |             |             |           |
| 0.2414325   | 0.5087538   | 0.9764257   | 0.1374859   | 0.4505733   | 0.2464477   |             |             |             |           |
| 0.441798973 | 0.3160573   | 0.743476239 | 0.523541845 | 0.2510923   | 0.285285    |             |             |             |           |
| 0.3488573   | 0.0287944   | 0           | 0.27524129  | 0.0899184   | 0           | 0.08468158  |             |             |           |

|             |             |                    |                   |                    |             |                   |
|-------------|-------------|--------------------|-------------------|--------------------|-------------|-------------------|
| 0.1408388   | 0.1006736   | 0                  | 0.02695517        | 0.3047853          | 0.035974671 | 0.2945986         |
| 0.191267828 | 0           | 0                  | 0.1748870         | 0.0352949          | 0.1039008   | 0                 |
| 0.0340521   | 0.06188399  | 0.1865937          | 0                 | 0                  | 0.5208423   | 0                 |
| 0.06348753  | 0.07256877  | 0.1318623          | 0                 | 0.068821498        | 0.1636473   | 0                 |
| 0.0775008   | 0.08022716  | 0.05568884         | 0                 | 0                  | 0.07574612  | 0.1268460.1345926 |
| 0           | 0.09471985  | 0.0868980.02931301 | 0.03803759        | 0.077952644        | 0.1993334   | 0                 |
| 0           | 1.088606047 | 1.37113            | 0                 | 0                  | 0           | 0.1459422         |
| 0           | 0.02202163  | 0                  | 0.09842604        | 0.1774341          | 0           | 0                 |
| 0.084596877 | 0           | 0.0233144          | 0                 | 0                  | 0           | 0.04346569        |
| 0.03230533  | 0.09457425  | 0.07548445         | 0                 | 0.1017827          | 0.256998518 | 0.1712587         |
| 0.104449179 | 0.05698829  | 0                  | 0.2765203         | 0                  | 0.88264     | 0                 |
| 0.07199362  | 0.09806165  | 0.04431292         | 0                 | 0                  | 0.04010914  | 0.07398411        |
| 0.1194983   | 0           | 0.5506920          | 0                 | 0.06040574         | 0           | 0.1429742         |
| 0.4067358   | 0.06622107  | 0                  | 0.07801763        | 0.05893705         | 0           | 0                 |
| 0           | 0           | 0.5336267          | 0                 | 0                  | 0.4367285   | 0.02661548        |
| 0           | 0           | 0.08164131         | 0.032912114       | 0                  | 0           | 0                 |
| 0.07910962  | 0.03547765  | 0                  | 0                 | 0                  | 0           | 0.2115426         |
| 0.4417281   | 0.525607715 | 0                  | 0                 | 0                  | 0.07031752  | 0                 |
| 0           | 0.1319292   | 0                  | 0.2346059         | 0.4011762          | 0.1135689   | 0                 |
| 0           | 0           | 0.036028995        | 0.04195184        | 0.09934284         | 0.04426099  | 0.03287183        |
| 0.08020014  | 0.03025999  | 0.065368947        | 0.07469011        | 0.0404316          | 0           | 0.1111357         |
| 0           | 0.08975863  | 0.04875618         | 0.08151369        | 0.02712689         | 0           | 0.05202869        |
| 0.01982636  | 0           | 0.0555779          | 0                 | 0                  | 0           | 0.12219906        |
| 0.072027994 | 0.116027485 | 0.03685988         | 0.04454236        | 0.07281058         | 0.3069795   | 0                 |
| 0.045412832 | 0           | 0.0880068          | 0                 | 0.049099576        | 0           | 0                 |
| 0           | 0.3418656   | 0.07335261         | 0                 | 0.2929338          | 0           | 0                 |
| 0           | 0.5699588   | 0.02454596         | 0                 | 0                  | 0.04527627  | 0                 |
| 0           | 0.466558476 | 0.1252465          | 0.04568615        | 0.08437064         | 0           | 0.03090077        |
| 0.0841886   | 0           | 0.3274357          | 0                 | 0.0417530.07644472 | 0.1291361   | 0.03723023        |
| 0.031418168 | 0.1007813   | 0                  | 0.0666216         | 0.07286602         | 0           | 0                 |
| 0.05651029  | 0.1667692   | 0.1261282          | 0.109991618       | 0.273726197        | 0.06073216  | 0                 |
| 0.5702727   | 0           | 0.1246487          | 0.2141280.5827875 | 0.1509338          | 0           | 0.2240589         |
| 0.1379973   | 0           | 0                  | 0.07221081        | 0.1581488          | 0.04050346  | 0.0278920.1730455 |
| 0.101547528 | 0           | 0.07630597         | 0.2281082         | 0                  | 0.1371341   | 0.1503285         |
| 0.1579344   | 0           | 0                  | 0                 | 0.05184102         | 0.028040251 | 0.1978456         |
| 0.9333834   | 0.1124842   | 0.02482346         | 0.02335196        | 0.05358631         | 0.05770321  |                   |
| 0.2334309   | 0.08117574  | 0.05439823         | 0.37638525        | 0.06450145         | 0.1156965   | 0                 |
| 0.1798534   | 0.028152345 | 0                  | 0.05454835        | 0.1885779          | 0.286871803 | 0.037769152       |
| 0.1142624   | 0           | 0.2276631          | 0                 | 0                  | 0.06958748  | 0                 |
| 0.04352425  | 0.02398321  | 0                  | 0.031150808       | 0.2778392          | 0.2804316   | 0.1362693         |
| 0.1104990   | 0.2775826   | 0.03641527         | 0.1709880         | 0.09409608         | 0           | 0                 |
| 0.2782571   | 0           | 0.02227757         | 0.02934742        | 0                  | 0           | 0.08445209        |
| 0.1267678   | 0.04569969  | 0                  | 0.2475214         | 0.03138632         | 0.04746927  | 0.1341086         |
| 0.1895624   | 0           | 0.0323699          | 0                 | 0.05593165         | 0           | 0.08326151        |
|             |             |                    |                   |                    |             | 0.8996896         |
|             |             |                    |                   |                    |             | 0                 |

0 0 0 0 0.3099399 0 0.07853307 0 0 0.03388124 0  
0.1781161 0.07186634 0 0 0.2199990 0.170741489 0.1184811  
0.090472151 0 0 1.2887950.02258872 0.02549755 0.03800379 0.06392049  
0.05047628 0.05278277 0.0635578 0 0.030856072 0 0.0399699 0  
0.1132261 0.02750166 0.08727145 0.07990378 0.03821159 0.2101926 0  
LINC01081 0.1273676 2.0945840.5893880.816700903 0.067252017 0.6917604  
2.1344862.5478940.9566848 2.2961310.3631526 1.03076926 1.908182  
0.912956845 1.227329475 0.1541653 0.4003631 0 0.5303743 0.03085786  
0.067596893 0 0 0 0.1648304 0.03373128 0 0.05346618  
0.044175349 0.8440935 0.134210667 0.03736382 0 0.1073768 0  
0.08668124 0 0.1643016 0.4393509 0.1054625 0 0.3039635  
0.1374774 0.06197916 0 0.07994649 0 0 0.3118398 0 0.1079475  
0 0 0 0.0843834 0.09516765 0 0.06838351 0.1032799 0.1228487  
0 0.05192048 0 0 0.116311902 0.05335351 0.03599511 0.04670853  
0.239306235 0 0 0.03913457 0.053470456 0 0 0.09699701 0  
0.1344081 0 0.09725848 0.07882935 0 0.02704161 0 0 0  
0.0399960 0.03035616 0 0 0 0 0.1358315 0.155595834 0.1264983  
0 0 0.0471635 0 0 0.1161331 0.04634583 0 0 0 0.1051491  
0.042753033 0 0 0.5659251 0.06538094 0.03187777 0 0.3004993  
0.05192384 0 0 0 0 0 0.09084931 0.02884277 0.2445646  
0.04470142 0.9363131 0.066246085 0.03126414 0.6675808 0.03571058  
0.2633493 0 0 0.1109898 0.08131663 0 0 0 0 0 0  
0.04604137 0 0 0.3640393 0 0.04740521 0.3351774 0.06536533 0  
0.1034917 0 0 0.25063 0 0.04538776 0 0 0.3661044 0.05432794  
0.09714321 0.043565028 0 0 0 0 0.0942263 0.04329419 0 0  
0.4701 0 0.06370897 0 0 0 0.03167797 0 0 0 0.1620034 0  
0 0.6568362 0 0 0.5344785 0 0 0 0.044242056 0.1030301 0  
0 0.1614608 0.1969646 0.03715796 0 0 0 0 0 0.64965486  
0.02755493 0.4190935 0.2001906 0 0 0 0.02434592 0  
0.3412364 0 0.06867333 0.09701745 0 0 0 0 0.047492254  
0.4978858 0 0 0.6910890 0.055765004 0.0644813 0 0.07352939  
0.060292168 0.3793343 0 0.2156124 0 0 0 0 0.5755361 0  
0.4402030.046463803 0 0 0.2226906 0.2109897 0 0.2324080.0559731  
0.1572784 0.1743209 0.6321280 0.450146511 0.03844932 0 0.02590088  
0 0.03794482 0 0.2584499 0 0.4330060 0 0 0.2378604 0 0  
0.1856326 0 0 0 0.05405825 0 0 0 0.05119635 0 0 0  
0.1118647 0 1.2004640 0 0.26294 0 0 0.09167544 0.2751347  
0.3953943 0 0 0.3546871 0.0242750 0.2740014 0 0.374087991  
0.1322367 0 0.2489840 0.0561316 0 0 0 0.07904383 0 0 0  
1.3119080 0 0.1228023 0 0 0.1147008 0.03290084 0.07085706 0  
0.2990410 0 0.15841 0.3314975 0 0.1577516 0.034569869 0 0  
0.1736742 0 0 0 0.04659342 0 0 0 0 0 0.1170957  
0.05344591 0 0 0.076503705 0 0.3443580 0.0678440.1291162  
0.5112892 0 0.2449602 0.06936123 0.05777297 0.1168752 0.04151881

|             |             |             |             |             |             |             |           |             |
|-------------|-------------|-------------|-------------|-------------|-------------|-------------|-----------|-------------|
| 0.0638353   | 0.08542194  | 0           | 0.02735589  | 0.1441495   | 0           | 0           | 0         | 0           |
| 0.1167491   | 0           | 0           | 0.05065761  | 0.03854105  | 0           | 0           | 0         | 0.0720824   |
| 0.03974884  | 0.1119311   | 0.1717042   | 0.03979085  | 0           | 1.1697670   | 0.06251355  | 0         |             |
| 0           | 0.06043631  | 0           | 0.2537286   | 0.03468051  | 0           | 0           | 0         | 0.544364541 |
| 0.03124556  | 0           | 0           | 0.06753732  | 0           | 0.461259051 | 0           | 0         | 0           |
| 0.02773798  | 0.06261979  | 0.1400011   | 0.03924581  | 0.1239654   | 0.04320998  | 0           | 0         |             |
| 0           | 0.037889929 | 0           | 0           | 0           | 0.06754172  | 0           | 0         | 0.09384438  |
| 0.1059513   |             |             |             |             |             |             |           | 0.103243    |
| AL513327.2  | 0.1262813   | 0           | 0.07304516  | 0           | 0.100017659 | 0.1469701   | 0.1548499 |             |
| 0.09906522  | 0           | 0.02742829  | 0           | 0.107576637 | 0.4489272   | 0.045258522 |           |             |
| 0.057945802 | 0.1528504   | 0.4961856   | 0.06067546  | 0.07011345  | 0.2447574   |             |           |             |
| 0.067020374 | 0.1642113   | 0.2980843   | 0.1374646   | 0.3000707   | 0.9396916   |             |           |             |
| 0.3344359   | 0.7548022   | 1.0602040   | 0.131395761 | 0           | 0.465731044 | 0.2222709   |           |             |
| 0.4156389   | 0.2129221   | 0.034361886 | 0.2578259   | 0.3162439   | 0.8959518   |             |           |             |
| 0.2178019   | 0.1045631   | 0           | 1.2054840   | 0.9995693   | 0.1843517   | 1.616715    |           |             |
| 0.2377939   | 0.2505841   | 0.2261034   | 0.3091802   | 0.1767026   | 0.4281074   |             |           |             |
| 0.1690324   | 0.209472682 | 0           | 0.1673274   | 1.17945     | 0.1302337   | 0.6441026   |           |             |
| 0.4607956   | 0.5481042   | 0.3688787   | 0.1029553   | 0.2184858   | 0.1002833   |             |           |             |
| 0.461279612 | 0.1586954   | 1.2133960   | 0.6020321   | 0.142359146 | 0.1941482   | 0           |           |             |
| 0.5820120   | 0.212057673 | 0.4685835   | 0.2174148   | 0.3846790   | 0.6481336   | 0.8439911   |           |             |
| 0.6615320   | 0.4821449   | 0.3907852   | 0.1505246   | 0.4021647   | 0           | 0.2097062   |           |             |
| 0.4320465   | 0.1586195   | 0.2437224   | 0.1504863   | 0.1178128   | 0.446313159 |             |           |             |
| 0.07168644  | 0.3122341   | 0.8080381   | 0           | 0.1254194   | 0           | 0.3951616   |           |             |
| 0.8417026   | 0.1622930   | 0.07866245  | 0.5757132   | 0.09190112  | 0.2155489   |             |           |             |
| 0.1652251   | 0.139062927 | 7.5061680   | 0.169553607 | 1.3182640   | 0.3400519   | 0.03740656  |           |             |
| 0.2592933   | 0.3792706   | 0.1835163   | 0.04965607  | 0.2574050   | 0.3506043   |             |           |             |
| 0.1989808   | 0.1079005   | 0.1484826   | 0.1919126   | 0.1953289   | 0.4203475   |             |           |             |
| 0.7435162   | 0           | 0.1329605   | 0.1031475   | 0.262724344 | 0.0309975   | 0.9192877   |           |             |
| 0.03540601  | 0.5222065   | 0.081321408 | 0.8329736   | 0.3301296   | 0.1612462   |             |           |             |
| 0.07961613  | 0.3799409   | 0.1435098   | 0.3966650   | 0.09075703  | 0.2282435   |             |           |             |
| 0.09533551  | 0.09549104  | 5.1252690   | 0.1843497   | 0.0940018   | 0.1993913   |             |           |             |
| 0.09721176  | 0           | 0.1026090   | 0.1432825   | 0.2484925   | 0.040069972 | 0.1800026   |           |             |
| 0.2730818   | 0.4329572   | 0.1361182   | 0.2154584   | 0.0963147   | 0.172773885 |             |           |             |
| 0.1088385   | 0.3204886   | 0.3319092   | 0.4202846   | 0.2335567   | 0.5580243   |             |           |             |
| 0.2808328   | 0.1773387   | 0.1434125   | 0.058174453 | 0.3158281   | 0.2723656   |             |           |             |
| 0.3504894   | 0.04280523  | 0.1884468   | 0.1213172   | 1.4214480   | 0.2871944   | 0           |           |             |
| 0.09480229  | 0.04080413  | 0.2238618   | 0.09217888  | 0.05046712  | 0.1514057   |             |           |             |
| 0.5480704   | 0.1020161   | 1.0419770   | 0.08772945  | 0.2043028   | 0.2822127   |             |           |             |
| 0.05388704  | 0.5602929   | 0.09764238  | 0.2210463   | 0           | 0.5910711   | 0.7875972   |           |             |
| 0.06316251  | 0.3382649   | 0.552097795 | 0.2185594   | 0.2967994   | 0.1984832   |             |           |             |
| 0.8917169   | 0.5430027   | 0.6967851   | 0.1355761   | 0.1206914   | 1.03248     |             |           |             |
| 0.2706608   | 0.8466831   | 0.06808763  | 0.19238     | 0.148775401 | 0.425582352 |             |           |             |
| 2.0118840   | 0.745389908 | 0.047087203 | 0.1346289   | 0.054229611 | 0.7091658   |             |           |             |
| 0.06229044  | 0.5432304   | 0.110578793 | 0.5114508   | 0.2500094   | 0.2551579   |             |           |             |

|                     |                     |                                            |                             |                           |                   |            |
|---------------------|---------------------|--------------------------------------------|-----------------------------|---------------------------|-------------------|------------|
| 0.47822359          | 0                   | 0.1559146                                  | 0.0855094                   | 0.4625029                 | 0.1924731         | 0.647447   |
| 0.2679169           | 0.7487064           | 0                                          | 0.2423159                   | 0.2805741                 | 0.829215421       | 0.1539473  |
| 0.308914969         | 0.2207914           | 0.2988432                                  | 0.09636856                  | 0.3456388                 | 0.05512313        |            |
| 1.4424180.2880569   | 0.3581352           | 0.2994511                                  | 0.162293567                 | 0.7624280.2781108         |                   |            |
| 0.3338397           | 0.6044776           | 0.1128636                                  | 0.1591116                   | 0.2562457                 | 0.3886815         |            |
| 0.09199564          | 2.2934140.1525008   | 0.04653511                                 | 0                           | 0.04532721                | 0.191255584       |            |
| 0.1226996           | 0.2701929           | 0.3244429                                  | 0.3844239                   | 1.33993                   | 0                 | 0.04479612 |
| 0.03440019          | 0.2030388           | 0.1535591                                  | 0.044637679                 | 0.055542878               | 0.07394043        |            |
| 0.2455874           | 0.04959271          | 0.3186064                                  | 0.4046874                   | 0.04344958                | 0.09460459        |            |
| 0.09187972          | 0.5908081           | 0.1818588                                  | 0.3920221                   | 0.2229831                 | 0.4247553         |            |
| 0.3516621.5644170   | 0.3056225           | 0                                          | 0.206054153                 | 0.7866536                 | 0.0929013         |            |
| 0.1542878           | 0                   | 0.2226115                                  | 0.3202895                   | 0.7691306                 | 0                 | 0.3526636  |
| 0.2249923           | 1.3254280.273108461 | 0.1445243                                  | 0.2939938                   | 0.1553883                 |                   |            |
| 0.08116996          | 0                   | 0.090666497                                | 0.2274451                   | 0                         | 1.8968240.2841984 | 0.2635471  |
| 0.1324579           | 0.291609196         | 0.1963237                                  | 0.4695290.3777878           | 0.3128123                 |                   |            |
| 0.102825089         | 0                   | 0.2656470.5165789                          | 0.232841222                 | 0.137950017               | 0.1391127         | 0          |
| 0.09239206          | 0.09632925          | 0.3462973                                  | 0                           | 0.3489527                 | 0.2506709         | 0.5804849  |
| 0.4239206           | 0.1459959           | 0.3577637                                  | 0.113776833                 | 0.04832355                | 6.657709          |            |
| 0.3318113           | 0.4372249           | 0.1280150.3379523                          | 0.3103450.03469586          | 0                         |                   |            |
| 0.4582419           | 0.1545046           | 0.2058235                                  | 1.0759450.08469339          | 0.3981064                 |                   |            |
| 0.1898581           | 0.1429201           | 0.2970764                                  | 0.7559615                   | 0.3598668                 | 0.1109299         |            |
| 0.3086755           | 0.1669159           | 0.3718564                                  | 0.05022556                  | 0.1910617                 | 0.75131           |            |
| 0.05442504          | 0.5385081           | 0.2501367                                  | 0.3152786                   | 0.1109765                 | 0.1702397         |            |
| 0.03945148          | 0.1013696           | 0.1288656                                  | 0.3099019                   | 2.6030630.3506892         |                   |            |
| 0.1198417           | 0.5703643           | 0.08385486                                 | 0.06876946                  | 1.1473530.9013513         |                   |            |
| 0.5060824           | 0.6187479           | 0                                          | 0.2788117                   | 0.04374806                | 0.3218706         | 0.2030012  |
| 0.1004420.393801863 | 0.083150013         | 0.2404147                                  | 0.275370992                 | 0.1740087                 |                   |            |
| 0.9135004           | 0.7845438           | 0.6875351                                  | 0.4035572                   | 0.4164211                 | 0.3891109         |            |
| 0.1229081           | 0.2784694           | 0.2708321                                  | 0.5316081                   | 0.187833869               | 0.7589326         |            |
| 0.6326153           | 0.1029185           | 0                                          | 0.9375194                   | 0.3187548                 | 0.5512623         | 0.651308   |
| 0.3070874           | 1.505683            |                                            |                             |                           |                   |            |
| AP003419.3          | 0.7732595           | 0                                          | 0.6626340                   | 0.48390233                | 0.7555079         | 0.374595   |
| 0.4942722           | 0.1012307           | 0.02488176                                 | 0.2177511                   | 0.195177728               | 0.3490691         |            |
| 0.328452559         | 0.157697763         | 0.5546372                                  | 0.8102125                   | 4.1832030.5724350.4440667 |                   |            |
| 0.425585856         | 0.7944821           | 1.1116820.4676323                          | 0.3888730.8895104           | 0.5157558                 |                   |            |
| 1.0717420.3366197   | 0.516518348         | 0.3615211                                  | 0.603558607                 | 2.4196150.9803291         |                   |            |
| 0.5311727           | 0.280544524         | 0.07796282                                 | 1.4344140.5911045           | 1.5806441.565109          |                   |            |
| 0.1504352           | 0.7518247           | 1.0716320.7804341.0806631.0426290.09092763 |                             |                           |                   |            |
| 0.4395239           | 0.7011872           | 1.04193                                    | 0.4611781.0222590.342044174 | 1.17481                   |                   |            |
| 0.2656363           | 1.8403070.4725695   | 1.1070992.6009752.2650970.2091443          |                             |                           |                   |            |
| 0.0466983           | 0.2973013           | 0.8187543                                  | 0.889212367                 | 0.4798720.3884966         |                   |            |
| 1.8484650.301331448 | 0.4403070.9108924   | 1.5839280.288554299                        | 0.5579158                   |                           |                   |            |
| 0.5423806           | 0.8724102           | 0.1959862                                  | 0.8865215                   | 3.6006790.6998095         |                   |            |
| 0.9926095           | 0.1365494           | 0.09728704                                 | 0                           | 0.2989429                 | 0.7278771         | 0.4316783  |

2.2109440.3822411 0.7124979 0.872040531 0.6503083 1.3389772.321221  
1.749324536 0.4551003 0.09601126 0.4779646 2.8421260.4711207  
0.2140775 2.61131 0.7503184 0.5866099 0.1124138 0.252303724  
1.7023180.192264607 0.6923471.3367480.4072034 1.3525133.4979222.386185  
0.1351375 5.4173540.7553760.2527095 2.3491850.7408336 0.2176185  
0.2214924 0.4085583 1.8678070.3079527 1.12575 0.6082111 0.238332142  
0.6467505 0.9006530.1927128 0.03947692 1.696738929 0.6800738  
0.3493925 0.5119645 0.8305795 0.3446659 0.5858365 2.548848  
0.8331420.2195489 1.0766730.3891791 0.7507529 0.3929089 1.045213  
1.5775760.9646886 0.7054904 0.9947491.2566130.255670159 0.5849084  
2.2542160.654295372 0.5715171 0.3303041.091 0.3704417 0.5374998  
0.6116076 0.901214649 0.2468340.2907334 1.3549211.1144640.593243  
2.1027410.7005881 1.8098330.1626220.263866718 0.9741188 0.04941565  
1.9394880.3494794 1.0541960.5502686 2.5031 1.1463330.2914181  
0.5160032 0.6292676 0.3323089 2.1323280.5035974 0.3777092.485928  
1.5269851.5919780.159168712 2.9190211.1337640.7332599 3.2674720.5314616  
0.2005236 0.613671538 0.4537027 6.56423 0.3724389 0.3682311  
1.085151597 0.09913381 1.5616120.1800554 0.7490064 1.0230680.9481399  
0.2459774 0.1970748 3.0563430.5524465 1.1041071.1117910.4799267  
0.202443897 0.267279141 4.4054 0.397756135 0.04271547 0.7327773  
0.787116058 1.2062331.0171290.7391926 1.203747484 1.91386 0.7451923  
2.3477490.650735582 0.1364723 0.8486340.4654225 0.1727611 0.4656088  
1.1327190.8101420.4630869 0.06470607 0.5966502 0.5656103 3.385027361  
1.2568890.400334679 0.9442354 0.1897683 0.6410901 4.5464540.4000425  
4.3852391.5678761.6650341.49407 0.220838538 0.3804029 1.1605340.3727322  
1.4051620.6143098 1.0103741.6736760.1322231 0.1947271 3.338453  
0.1383422 0.5065757 0.7131212 0.4111888 1.179791699 0.7791542  
0.2451073 0.8093816 0.8047678 0.7293159 0.5472639 1.178476  
1.3106672.3944440.7893787 0.40493368 1.05810794 1.2408981.262456  
0.7198137 0.6606306 0.7801190.1576623 0.1501871 0.7084691  
0.2061367 0 1.3208940.2311778 0.8891991 0.8772846 0.6550023  
0.1342020.8009373 0.1146719 0.48600084 2.4580180.4635182 0.6998161  
3.0892541.00971714.610650.0581435 0 0.7109358 1.4797490.7729526  
0.278721183 0.4370206 0.2666985 0.09397437 0.3681693 0.41411  
0.137081197 0.1547462 0.4734667 1.0834140.7734374 0.4482722  
0.4806404 0.188953735 0.1424771 1.8315260.2665543 0.2837698  
0.248742575 0.8773843 1.2651631.1975790.264029335 0.208570465 0.6940834  
0.2764769 0.2095352 1.3544790.9873158 0.7685580.9948865 0.7579927  
0.9478634 1.0575471.8806640.4687911 0.412853652 0.4822073 4.723266  
1.3545220.5796922 0.7354876 1.2646250.5630631 0.09442375 1.185312  
0.6235458 0.9811189 1.6804280.4880252 0.6914716 0.9286583  
0.2460443 0.5186036 0.1616969 3.0431290.3264555 0.5031541  
0.8050491 0.2523648 3.2468210.3644996 0.2079875 2.6737960.5924644  
0.4885112 1.6532251.4300362.5168260.06177364 0.07157734 0.1226108



|             |             |             |              |             |             |             |            |            |            |
|-------------|-------------|-------------|--------------|-------------|-------------|-------------|------------|------------|------------|
| 0.3507039   | 0.9558407   | 3.8527880   | 0.7069557    | 0.3805033   | 1.07462     | 0.3803475   |            |            |            |
| 0.6550391   | 2.6888081   | 5.6799650   | 0.0832       | 0.1871004   | 0.4284106   | 0.1686173   |            |            |            |
| 3.6114571   | 4.5993530   | 6.0692320   | 1.1518610    | 4.2868798   | 0.1508601   | 0.5670438   |            |            |            |
| 0.5495701   | 93.1262825  | 1.4732233   | 5.5585210    | 3.243251    | 0           | 0.3777591   | 0.6000737  |            |            |
| 1.1707181   | 0.4932503   | 1.58835     | 2.29997      | 0.1703947   | 48.2012453  | 2.1189460   | 0.560179   |            |            |
| 0.5627361   | 3.30609     | 0.9638685   | 0.6177474    | 1.2660821   | 5.3217      | 1.747069    |            |            |            |
| OPA1-AS1    | 0           | 0.06124131  | 0            | 0           | 0.1573047   | 69.0924600  | 7          | 0          | 0.04674204 |
| 0.0526522   | 0           | 0           | 0.0507579    | 91.01815581 | 0.0427087   | 46          | 0          | 0.04807972 | 0          |
| 0           | 0           | 0.2020973   | 0.1264891    | 56          | 0           | 0.1562727   | 0          | 0.2427131  | 0.0771088  |
| 0.2524755   | 0.09290584  | 0.2501184   | 0            | 0.03760692  | 0.0313923   | 34          | 0.0349581  |            |            |
| 0.1176668   | 0           | 0.0324260   | 050.04055008 | 0.05968546  | 0.3074457   | 0           | 0          |            |            |
| 0.03912223  | 0           | 0.04287525  | 0.05798855   | 0.08029645  | 0           | 0           | 0.03048073 |            |            |
| 0.0729404   | 0           | 0.02524929  | 0.05316983   | 0.039534281 | 0           | 0.07895026  |            |            |            |
| 0.04452008  | 0.2457932   | 0.06398054  | 0            | 0.4597557   | 0.2175605   | 0.09715502  |            |            |            |
| 0           | 0           | 0.217646014 | 0.04991827   | 0.3030977   | 0.2622068   | 0           | 0.2290128  | 0          |            |
| 0.03661484  | 0.150083071 | 0.1658192   | 0.1538746    | 0.2268793   | 0.3567777   |             |            |            |            |
| 0.08383603  | 0           | 0.04549818  | 0            | 0           | 0.2277045   | 0           | 0.02827026 | 0          |            |
| 0.1122624   | 0.04599831  | 0.1420082   | 0.03705849   | 0.064795193 | 0.03382388  | 0           |            |            |            |
| 0.1694477   | 0.072788796 | 0.2367071   | 0            | 0.1242997   | 0           | 0.03062995  | 0          |            |            |
| 0.1086557   | 0.2168090   | 0.03390088  | 0.03897916   | 0.032807099 | 11.018440   | 0           |            |            |            |
| 0.1604470   | 0.1835139   | 0.05965055  | 0            | 0.04685854  | 0           | 0.0413565   |            |            |            |
| 0.1502165   | 0.05091082  | 0.07005871  | 0.1811006    | 0.1382434   | 0.02833329  |             |            |            |            |
| 0.1619142   | 0.1830544   | 0           | 0.09733637   | 0.061980743 | 0           | 0.2775990   | 2.338792   |            |            |
| 0.1642621   | 0           | 0.1965114   | 0            | 0           | 0           | 0.1354248   | 0.03119314 |            |            |
| 0.1625004   | 0.02854799  | 0.08615387  | 0.04498225   | 0.09011126  | 7.697563    |             |            |            |            |
| 0.1304729   | 0.04435296  | 0.06271931  | 0.09173504   | 0           | 0.04841411  | 0.212766957 |            |            |            |
| 0           | 0.04689858  | 0.037812509 | 0.08493082   | 0           | 0           | 0.1712661   | 0          | 0.09088852 |            |
| 0.1222801   | 09.0        | 0.1008110   | 3.132101     | 0.1220328   | 0           | 0.08101328  | 0.2153216  |            |            |
| 0.04183695  | 0           | 0.109794039 | 0.1788210    | 10.1028084  | 0.1322974   | 0.04039366  |            |            |            |
| 0.2963834   | 0.03816082  | 0.2761636   | 0            | 0           | 0.1341920   | 0.03840906  |            |            |            |
| 0.04349285  | 0           | 0.1071569   | 0            | 0           | 0.3105077   | 0.041393473 | 0.2891892  |            |            |
| 0.03804477  | 0           | 0.03776622  | 0.0460707    | 0.4867170   | 11.12652924 | 0.04290549  | 0          |            |            |
| 0.08940609  | 0.3192078   | 0           | 0.1804654    | 0           | 0.1873011   | 0.6233180   |            |            |            |
| 0.3885402   | 0.1279380   | 0.06833513  | 0.5127959    | 0           | 0.1498092   | 0.03212586  |            |            |            |
| 0.04538543  | 0.140393689 | 0.03089276  | 0.3928011    | 0.124128725 | 0.044434402 |             |            |            |            |
| 0.08469615  | 0.051174422 | 0           | 0.05878112   | 0.09611735  | 0.052174501 | 0.1206592   |            |            |            |
| 0.1685174   | 0           | 0.056410177 | 0            | 0           | 0           | 0.05134663  | 0.1816296  | 0.4364079  |            |
| 0           | 0.3853777   | 0           | 0.09799899   | 0.02941857  | 0.04347217  | 0.07263709  | 0          | 0          |            |
| 0.0282007   | 0           | 0           | 0.1560528    | 0.1103639   | 0           | 0           | 0.5651612  | 0          | 0          |
| 0.1049770   | 12.11661    | 0.2139085   | 0            | 0           | 0           | 0.22924     | 0.0289376  | 0.2013216  |            |
| 0           | 0           | 0.07418182  | 0.1283207    | 0.25267287  | 0.08684019  | 0.08499026  | 0          |            |            |
| 0.08371529  | 0.1011553   | 0.04744055  | 0            | 0.1298486   | 0.1437      | 0           | 0.08424576 |            |            |
| 0.052413702 | 0.2093243   | 0           | 0            | 0.4295096   | 0.04773601  | 0.04100171  |            |            |            |
| 0.06695607  | 0           | 2.7018430   | 0.1056961    | 0.06012019  | 0.3083272   | 0           |            |            |            |

|             |             |             |             |             |             |             |
|-------------|-------------|-------------|-------------|-------------|-------------|-------------|
| 0.2952563   | 0.04653415  | 0.06408986  | 0           | 0.194445468 | 0.08248167  | 0           |
| 0.02911911  | 0.04869046  | 0           | 0           | 1.2096660   | 0.1848862   | 0.1061583   |
| 0.2382392   | 0           | 0           | 0           | 0.09775603  | 0.0382985   | 0.04307744  |
| 0.3219469   | 0           | 0.3646216   | 0.05363744  | 0.03108742  | 0           | 0.039311501 |
| 0.04430766  | 0.03961155  | 0.08855673  | 0.032344042 | 0           | 0           | 0.05416398  |
| 0.130178185 | 0.02187922  | 0.2588424   | 0           | 0.1363534   | 0.1400518   | 0           |
| 0.09408383  | 0.07884954  | 0.03651877  | 0.1000094   | 0.02755415  | 0           | 0.035788957 |
| 0.09120219  | 10.954320   | 0.1565588   | 0.1269516   | 0           | 0.1594564   | 0.1255118   |
| 0.1297906   | 0.1621595   | 0.2187001   | 0           | 0.1194504   | 0.07992193  | 0.2146731   |
| 0           | 0           | 0           | 0.2675145   | 0.1940529   | 0.05234018  | 0.1456427   |
| 0           | 0.03605954  | 0.1090743   | 0           | 0.07259566  | 0.06744128  | 0.1115687   |
| 0.05236214  | 0.2891678   | 0           | 0.0637724   | 0           | 0.1169771   | 0.2154747   |
| 0.03677023  | 0           | 0.1242072   | 0           | 0           | 0.2255653   | 0.05003359  |
| 0.1557037   | 0.445650548 | 0.02923378  | 0           | 0.04339101  | 0           | 0.09478327  |
| 0.185807921 | 0.039232753 | 0           | 0.15591428  | 0           | 0.2873452   | 0           |
| 0.05858793  | 0.0436623   | 0           | 0           | 0           | 0.3087128   | 0.070900672 |
| 0.3673692   | 0.09712024  | 0           | 0.1579824   | 0.06684373  | 0.1224012   | 0.1756042   |
| 0           | 0.1321726   |             |             |             |             |             |
| AC007365.1  | 0.1180741   | 0.1941750   | 0.08195737  | 0.252369697 | 0.099751796 | 0.1099346   |
| 0.1930478   | 0.2223043   | 0.1669419   | 0.1436157   | 0.3142110   | 0.040234005 |             |
| 0.1679002   | 0.033853663 | 0.216719149 | 0.03811103  | 0.14846     | 0           | 0           |
| 0.100263335 | 0           | 0.07432298  | 0.2056488   | 0           | 0.3361673   | 0.02501602  |
| 0.02454769  | 0.1982597   | 0.065523245 | 0.08942891  | 0.099534226 | 0.08313004  |             |
| 0.6839813   | 0.1194503   | 0           | 0.09642769  | 0           | 0.06092524  | 0           |
| 0.06797129  | 0.04596541  | 0.06364807  | 0.05929046  | 0.1499508   | 0.04832193  |             |
| 0.1156344   | 0           | 0           | 0.08429156  | 0.125349522 | 0           | 0           |
| 0.05071504  | 0.03829756  | 0.1366618   | 0           | 0.1155169   | 0.0408572   | 0.03750629  |
| 0           | 0.1187052   | 0.1067798   | 0.1385612   | 0.141980733 | 0.03630601  | 0           |
| 0.158620492 | 0.3285970   | 0.08131384  | 0.2877423   | 0           | 0.09968064  | 0.04498456  |
| 0.1442590   | 0.07506226  | 0.3008218   | 0.18345822  | 0.0448176   | 0.1846706   | 0           |
| 0           | 0.1350777   | 0.08812474  | 0.051360783 | 0           | 0.0212321   | 0.1678938   |
| 0.2814436   | 0           | 0.0492639   | 0.06995544  | 0           | 0.17652     | 0.2153186   |
| 0.1074880   | 0.06179472  | 0.182034924 | 4.9128290   | 0.06341359  | 0.05189842  | 0.2119675   |
| 0.1119214   | 0           | 0.6383179   | 0           | 0           | 0.03278178  | 0.05953557  |
| 0.03588797  | 0           | 0.04491752  | 0.06417172  | 0           | 0.1657589   | 0.03857749  |
| 0.098259743 | 0           | 0.1925373   | 0.1589035   | 0.06510229  | 0           | 0.06230695  |
| 0.0411565   | 0.06030659  | 0.05955337  | 0.03552478  | 0.05367313  | 0           | 0.04293604  |
| 0.02262895  | 0.1024365   | 0.2495905   | 0.07142791  | 1.72788     | 0           | 0           |
| 0           | 0           | 0.0383761   | 0.210815745 | 0.1071762   | 0.03717479  | 0.029972595 |
| 0.3029470   | 0.2042669   | 0           | 0.0339391   | 0.2417463   | 0.2881760   | 0.064617984 |
| 0.04070596  | 0.07990918  | 0           | 0.04836547  | 0           | 0.06421627  | 0.2757099   |
| 0.08045511  | 0.130544587 | 0           | 0.08149248  | 0.1835178   | 0.06403716  | 0.1174662   |
| 0.3932329   | 0.2189048   | 0.08592928  | 0.2402921   | 0.1772818   | 0.09156525  |             |
| 0.1065591   | 0           | 0.03774972  | 0.1698787   | 0.04555113  | 0.1526174   | 0.1230641   |

|             |             |             |             |             |             |             |
|-------------|-------------|-------------|-------------|-------------|-------------|-------------|
| 0.328110942 | 0.07640989  | 0.1206268   | 0.1209236   | 0           | 0.1460743   | 0.6613762   |
| 0           | 0.1360385   | 0           | 0           | 0.2530243   | 0           | 0.08174191  |
| 0.1729285   | 0           | 0.2369090   | 0.1352157   | 0.03611117  | 0.08129492  | 0           |
| 0.07639498  | 0           | 0.055642475 | 0.097950251 | 0.05189318  | 0.065594871 | 0.035221528 |
| 0.06713554  | 0.040564095 | 0           | 0.04659365  | 0           | 0.082713643 | 0.04782106  |
| 0.1068621   | 0           | 0.044714287 | 0.1125298   | 0           | 0.2878271   | 0.1424521   |
| 0.1439711   | 0.2075548   | 0.6012106   | 0.05091247  | 0           | 0.02589341  | 0.02331902  |
| 0.068917603 | 0           | 0.099030157 | 0.02359333  | 0.06706099  | 0.0961124   | 0.08618001  |
| 0           | 0.05832095  | 0           | 0.03348593  | 0           | 0.091047467 | 0.0570301   |
| 0.4610108   | 0.02825957  | 0           | 0.1190165   | 0.1533387   | 0           | 0.0917511   |
| 0.03989507  | 0           | 0.1044257   | 0.05880122  | 0           | 0.057224159 | 0.06883505  |
| 0.1516784   | 0.0884774   | 0.1202731   | 0           | 0           | 0           | 0.03828772  |
| 0.789382114 | 0           | 0           | 0.03709566  | 0.9192327   | 0           | 0.06500112  |
| 0.06872662  | 0.8838565   | 0           | 0.08378143  | 0.1667928   | 0.1221999   | 0.1315227   |
| 0.1260209   | 0.07377185  | 0.02540084  | 0.09455403  | 0           | 0.1307604   | 0.1042361   |
| 0.04616331  | 0           | 0           | 0.03422551  | 1.0068010   | 0.1027103   | 0.05862102  |
| 0.1180272   | 0.076607577 | 0.03603503  | 0           | 0.03874382  | 0.09107347  | 0.1024377   |
| 0.180850983 | 0.2551956   | 0.1464009   | 0.07882424  | 0           | 0.02464186  | 0.09907939  |
| 0           | 0.05874055  | 0           | 0.03139863  | 0.09359425  | 0.051275882 | 0.05167552  |
| 0.217708399 | 0.206374986 | 0.03468572  | 0.09118886  | 0.1036648   | 0.03602744  |             |
| 0.03700466  | 0.1901170   | 0.03728841  | 0.06250115  | 0.2315768   | 0.2774584   |             |
| 0.1092058   | 0.1189376   | 0.028368599 | 0.03614632  | 3.8946230   | 0.08273232  | 0           |
| 0.1915120   | 0.1579941   | 0.0994886   | 0.07785818  | 0.05144015  | 0.04284598  |             |
| 0.0577852   | 0           | 0.02367098  | 0.0633512   | 0.2127044   | 0.1014393   | 0.08017884  |
| 0           | 0.1767075   | 0.05768199  | 0.3319052   | 0.02886141  | 0.08323612  | 0           |
| 0.04322959  | 0           | 0.05754393  | 0           | 0           | 0.08301111  | 0.2037446   |
| 0.0963923   | 0           | 0.03415979  | 0.2040249   | 0.1344636   | 0.06563633  | 0.2822579   |
| 0.3857999   | 0.1787974   | 0.2379588   | 0           | 0.2159861   | 0           | 0.02317255  |
| 0.03439447  | 0           | 0           | 0.117826522 | 0.279885331 | 0.07193269  | 0.205979259 |
| 0           | 0.0822849   | 0.1625418   | 0.06921903  | 0.05821148  | 0           | 0.01602284  |
| 0.02894059  | 0           | 0.056200373 | 0.1310046   | 0.03640002  | 0.03849184  | 0.1546701   |
| 0.02504537  | 0.07947687  | 0.04851149  | 0.1739938   | 0           | 0.0261921   |             |
| LINC00630   | 0.2433247   | 0.2911553   | 0.2142712   | 0.326019308 | 0.176419016 |             |
| 0.4283054   | 0.3028252   | 0.2564105   | 0.2567392   | 0.3502304   | 0.2899342   |             |
| 0.358879038 | 0.5348697   | 0.197840906 | 0.146648219 | 0.4923306   | 0.3139344   |             |
| 0.0977177   | 0.2661628   | 0.3237918   | 0.585939222 | 0.5226272   | 0.472444    |             |
| 0.5297463   | 0.3550505   | 0.4088922   | 0.8386901   | 1.0306240   | 0.7500608   |             |
| 0.216650995 | 0.2246361   | 0.386509931 | 0.1619374   | 0.8128254   | 0.4470085   |             |
| 0.122538007 | 0.9046039   | 0.2837585   | 0.4403743   | 0.6890115   | 0.1984698   |             |
| 0.3004553   | 0.2860142   | 0.3240515   | 0.42414     | 0.6656117   | 0.1458920   | 0.345913    |
| 0.5833655   | 0.2134003   | 0.2947428   | 0.7017779   | 0.2527817   | 0.404826381 |             |
| 0.1031375   | 0.7170105   | 0.4830161   | 0.3932646   | 0.3431755   | 0.2885984   |             |
| 0.5604576   | 0.3288649   | 0.5507238   | 0.3141705   | 0.4441418   | 0.577066226 |             |
| 0.01825561  | 0.4885430   | 0.6286232   | 0.300233355 | 0.3294257   | 0.1668468   |             |

|                           |                     |                           |                                   |                           |             |
|---------------------------|---------------------|---------------------------|-----------------------------------|---------------------------|-------------|
| 0.3124431                 | 0.451292224         | 0.5592516                 | 0.2313465                         | 0.8186576                 | 0.4846297   |
| 0.3730261                 | 0.2490536           | 0.3993394                 | 0.2697252                         | 0.4271203                 | 0.5736642   |
| 0.543118679               | 0.5376133           | 0.5147573                 | 0.6796965                         | 0.1682204                 | 1.367591    |
| 0.8041248                 | 0.35544383          | 0.2845039                 | 0.5844842                         | 0.4389453                 | 0.221829969 |
| 0.6636739                 | 0.07305051          | 0.7273222                 | 0.3442693                         | 0.5824875                 | 0.1131122   |
| 0.6291611                 | 0.5391667           | 0.3967327                 | 0.5464444                         | 0.547903497               | 5.192851    |
| 0.585140851               | 0.08779579          | 0.2477478                 | 0.4001869                         | 0.5816451.0034810.1337024 |             |
| 0.3370206                 | 0                   | 0.7209339                 | 0.5402009                         | 0.2110108                 | 0.2903733   |
| 0.4249779                 |                     |                           |                                   |                           |             |
| 0.3819861                 | 0.4075629           | 0.5362124                 | 0.4965075                         | 0.1478535                 | 0.2373126   |
| 0.35511606                | 0.1711591           | 0.5541341                 | 0.6190885                         | 0.5556689                 | 0.205806791 |
| 0.4647347                 | 0.2658365           | 0.3709809                 | 0.4670930.1966802                 | 0.2228679                 |             |
| 0.2433631                 | 0.6272959           | 0.7134196                 | 0.3465807                         | 0.5593157                 | 0.300253    |
| 3.6870030.1696542         | 0.1081355           | 0.2370166                 | 0.3280291                         | 0.3235844                 |             |
| 0.2655829                 | 1.076385793         | 0.5851316                 | 0.3087231                         | 0.470166138               | 0.4037807   |
| 0.2094275                 | 0.1272807           | 0.2139986                 | 0.9914150.9639266                 | 0.660848455               |             |
| 0.3818693                 | 0.8663884           | 0.2545424                 | 0.3570290.2310590.2370190.3876691 |                           |             |
| 0.07650098                | 0.4578067           | 0.762902949               | 0.2034562                         | 0.2694529                 | 0.354805    |
| 0.1969649                 | 0.3143322           | 0.2744640.6011655         | 0.1982254                         | 0.2633002                 |             |
| 0.2453768                 | 0.3332688           | 0.3324357                 | 0.3287193                         | 0.2322205                 | 0.2525471   |
| 0.1611216                 | 0.4283449           | 0.8895204                 | 0.383496262                       | 0.2761495                 | 0.6771167   |
| 0.2851506                 | 0.4235523           | 0.4380615                 | 0.4195651                         | 0.24718986                | 0.6224085   |
| 0.1925286                 | 0.5231474           | 0.7004250.243458381       | 0.2828487                         | 0.2321689                 |             |
| 0.6792707                 | 0.4179151           | 0.5189369                 | 0.6011630.7850021                 | 0.2138106                 |             |
| 0.5250970.3113562         | 0.4930807           | 0.3720437                 | 0.6971121                         | 0.367960942               |             |
| 0.990439923               | 1.0773850.489258582 | 0.243751634               | 0.4284769                         | 0.299440031               |             |
| 0.3773042                 | 0.3081215           | 0.5038322                 | 0.413416055                       | 0.2868208                 | 0.5382223   |
| 0.08386354                | 0.563880391         | 0.4153417                 | 0.1972930.2459156                 | 0.7511193                 |             |
| 0.5682922                 | 1.1065510.3287463   | 1.5385570.1066690.7964271 | 0.3514498                         |                           |             |
| 0.174880319               | 0.3541882           | 0.335055676               | 0.4499226                         | 0.3781536                 | 0.6318913   |
| 0.07952151                | 0.7799578           | 0.4574268                 | 0.1192924                         | 0.1338944                 | 0.4650416   |
| 0.331384196               | 0.3552106           | 0.4670925                 | 0.5996844                         | 0.5475994                 | 0.2336999   |
| 0.2516730.1886551         | 0.8048195           | 0.2857348                 | 0.4478875                         | 0.4151848                 |             |
| 0.7440938                 | 0.09947315          | 0.3337114                 | 0.281615286                       | 0.6139945                 | 0.2486544   |
| 0.1819471                 | 0.1700862           | 0.2527890.4221709         | 0.2885762                         | 0.4392542                 |             |
| 0.6189522                 | 0.3120773           | 0.308095235               | 0.926463923                       | 0.5528757                 | 0.2825129   |
| 0.2624266                 | 0.5235866           | 0.2153097                 | 0.2549106                         | 0.4788473                 | 0.169111    |
| 2.2898620.6171467         | 0.3350024           | 0.4214090.4510335         | 0.4045364                         | 0.7170859                 |             |
| 0.2893062                 | 0.4453278           | 0.1793442                 | 0.265479827                       | 0.3066712                 | 0.1870217   |
| 0.4614632                 | 0.03561319          | 0.1600515                 | 0.03684468                        | 1.8727710.3869965         |             |
| 0.3155355                 | 1.0288140.6171459   | 0.683323801               | 0.1717962                         | 0.4481116                 |             |
| 0.4528380.3128040.1732924 | 0.545829957         | 0.42844                   | 0.4165261                         | 0.9495837                 |             |
| 0.4250080.2311693         | 0.6094950.498389227 | 0.5329873                 | 0.3888902                         | 0.1207195                 |             |
| 0.4030269                 | 0.417941826         | 0.2702033                 | 0.07639712                        | 0.1650693                 | 0.187495151 |
| 0.883383141               | 0.6401162           | 0.6836648                 | 0.2231958                         | 0.3823045                 | 0.5577111   |

|                   |                    |                           |                        |                   |              |
|-------------------|--------------------|---------------------------|------------------------|-------------------|--------------|
| 0.2826340.2637901 | 0.5046313          | 0.5698254                 | 0.3047872              | 0.3896374         |              |
| 0.4618567         | 0.222502499        | 0.1500914.5854210.2544673 | 0.3443370.667591       |                   |              |
| 0.3304506         | 1.00472            | 0.4230733                 | 0.3401712              | 0.3953559         | 0.2710462    |
| 0.06629567        | 0.8263594          | 0.3897101                 | 0.3794559              | 0.3744074         | 0.4891165    |
| 0.3075691         | 0.3369795          | 1.0201520.2105546         | 0.1242803              | 0.04480296        |              |
| 0.09624761        | 0.6355498          | 0.6417837                 | 1.0969630.3756489      | 0.6194758         |              |
| 0.4850578         | 0.5938927          | 0.4723509                 | 0.3955892              | 0.1588413         | 0.6607959    |
| 0.2964826         | 0.2424183          | 1.0034030.6096084         | 0.1930049              | 0.9841827         |              |
| 0.2266878         | 0.7554941          | 0.7534225                 | 0.06099262             | 0.2434549         | 0.3511449    |
| 0.80713359        | 0.4312072          | 0.1107168                 | 0.5025034              | 0.06227296        | 0.1232469    |
| 0.525494152       | 0.6552168          | 0.2212499                 | 0.804607428            | 0.1334479         | 0.3736357    |
| 0.5415026         | 0.5441460.6963514  | 0.8037098                 | 0.8101848              | 0.09897163        |              |
| 0.2414862         | 0.3427086          | 2.3050290.423508476       | 0.04029426             | 0.9180626         |              |
| 0.2959821         | 0.1268621          | 0.2465099                 | 0.4359434              | 1.0295570.4602449 |              |
| 0.2649448         | 0.3504423          |                           |                        |                   |              |
| AL161719.1        | 0.1153752          | 0.5533987                 | 0.5338937              | 0.164400831       | 0.121839694  |
| 0.2387151         | 0.3143922          | 0.3620384                 | 0.4757844              | 0.2673011         | 0.07310215   |
| 0.458667661       | 0.8203124          | 0.220532433               | 0.070588523            | 0.2482662         | 0 0          |
| 0.3416437         | 0.1118096          | 0 0.2667190.08069352      | 0.1674569              | 0.05222009        | 0            |
| 0.04074037        | 0.5996650          | 0.106709285               | 0.1941885              | 0.243147896       | 0 0.05063238 |
| 0.1296889         | 0.041859024        | 0.3140788                 | 0.0770485              | 0.2976633         | 0 0 0 0      |
| 0.1106961         | 0.4491477          | 0 0 0.3052570             | 0 0 0.09778362         | 0.06863742        |              |
| 0.102070325       | 0 0.1528764        | 0.05747137                | 0.03966209             | 0 0.1247406       |              |
| 0.1483757         | 1.4042540.06270915 | 0.1330777                 | 0.1221633              | 0 0 0             |              |
| 0.0564142         | 0.057806441        | 0 0.2718219               | 0.04726643             | 0.193743601       | 0.3567625    |
| 0.0662127         | 0.05857611         | 0.06579538                | 0.3246741              | 0 0.4111381       | 0 0          |
| 0.0653213         | 0 0.03649433       | 0.07518731                | 0.0966137              | 0 0.1833197       |              |
| 0.04783915        | 0.20911176         | 0 0 0.4374833             | 0 0 0.1289294          | 0 0 0             |              |
| 0.04791258        | 0.07013233         | 0 0.04376296              | 0.05031855             | 0.042350982       | 0.7619898    |
| 0 0.1690406       | 0.1380817          | 0.04556799                | 0.07896658             | 0.8855395         | 0            |
| 0.1814704         | 0 0.3203249        | 0.09695792                | 0 0 0.05844612         | 0 0 0             |              |
| 0.05907664        | 0.05399003         | 0.2513048                 | 0.080011505            | 0.1888029         | 0.8510933    |
| 0.04313096        | 0 0.09906426       | 0 0.3351315               | 0 0.09698692           | 0 0.08741053      |              |
| 1.6107            | 0 0.25797          | 0.4448673                 | 0 0 6.0676360.05614287 | 0 0               |              |
| 0.2368432         | 0.05807852         | 0 0.2746628               | 0 0 0.048812512        | 0.4385519         | 0            |
| 0.1758069         | 0 0.1312337        | 0.3519864                 | 0.052617501            | 0 0.0650689       |              |
| 0.1347752         | 0.3150665          | 0.1138058                 | 0 0.2565790            | 0 0 0 0           |              |
| 2.4336710         | 0.2295624          | 0.3448350.1018577         | 0.06997099             | 0.1956664         |              |
| 0.8661482         | 0.04970685         | 0.7685304                 | 0.05614532             | 0 0.04610993      | 0 0          |
| 0.2004186         | 0.106870421        | 0 0.04911235              | 0.06564422             | 0.09750552        | 0.1189462    |
| 0 0 0.05538708    | 0.05996478         | 0 0 0.224185165           | 0.06656127             | 0 0 0             |              |
| 0.05088277        | 0.1543293          | 0 0.3528578               | 0.1985919              | 0.08242852        | 0            |
| 0.08294312        | 0.1757654          | 0.271853233               | 0.119639235            | 0.8451176         | 0.053412967  |
| 0.057360774       | 0.05466751         | 0.066061526               | 0 0.07588108           | 0.4135959         | 0.134705076  |

|             |             |             |             |             |             |             |
|-------------|-------------|-------------|-------------|-------------|-------------|-------------|
| 0           | 0.08701625  | 0.2220206   | 0.655383693 | 0.3665256   | 0.3798647   | 0.156249    |
| 0.4308449   | 0.4689345   | 0.1690089   | 0.4351620   | 0.1658292   | 0           | 0.2530156   |
| 0.5696504   | 0           | 0           | 0           | 0.1536937   | 0.03640454  | 0.03913148  |
| 0.1403503   | 0.06715     | 0.09497983  | 0           | 0.1636027   | 0           | 0.098851536 |
| 0.7430207   | 0           | 0.06256576  | 0.2301136   | 0           | 0           | 0.2497231   |
| 0           | 0           | 0.06497197  | 0.2476983   | 1.7006470   | 0.3830480   | 0.1104336   |
| 0.27958089  | 0.0747352   | 0.1097147   | 0.04940381  | 0.07204588  | 0           | 0.1224829   |
| 0           | 0           | 0           | 0           | 0           | 0.1870628   | 0           |
| 0           | 0           | 0           | 0           | 0           | 0           | 0           |
| 0.1663374   | 0           | 0           | 0.1440570   | 0.0559631   | 0           | 0.8861482   |
| 0.1364440   | 0.03880485  | 0.1990112   | 0           | 0.02931915  | 0.06007136  | 0.1654684   |
| 0.1539880   | 0.200809138 | 0.9050489   | 0           | 0           | 0           | 0.1114774   |
| 0.1561568   | 0.1672711   | 1.050154    | 0.4111223   | 0.07688629  | 0           | 0.1173712   |
| 0.2686034   | 0           | 0.9887977   | 0.2780453   | 0.699505765 | 0.2770695   | 0           |
| 0.0855806   | 0           | 0.4815724   | 0.2420368   | 0.101495149 | 0.09566319  | 0           |
| 0.05113491  | 0           | 0.041753218 | 0.08415727  | 0.08090158  | 0.1398416   | 0.709107357 |
| 0.336096406 | 0.02824409  | 0           | 0           | 0.4107129   | 0.1807942   | 0.3096191   |
| 0.1214537   | 0           | 0.1885697   | 0.06455155  | 0.6758281   | 0.04842458  | 0.184801158 |
| 0           | 0.8318257   | 1.279987    | 0.04097073  | 0.1039637   | 1.8525930   | 1.5215710   |
| 0.1675479   | 0.2093332   | 0.3764293   | 0.0501461   | 0.4625986   | 0           | 0.2078426   |
| 0.03304023  | 0.04352566  | 1.2304360   | 0.4028931   | 0.3444439   | 0           | 0.2350143   |
| 0.2033339   | 0           | 0           | 0           | 0.3520124   | 0.4640971   | 0           |
| 0.04353028  | 0.1440250   | 0.2027843   | 0           | 0           | 0           | 0           |
| 0.3924543   | 0.07550338  | 0           | 0.6170713   | 0           | 0.1068935   | 0.6129028   |
| 0.2094343   | 0.2911843   | 0           | 0.1681365   | 0.9044970   | 0.082184906 | 0.03773815  |
| 0           | 0           | 0.1648616   | 0           | 0.047972227 | 0.050645917 | 0.1757213   |
| 0           | 0           | 0           | 0.06182275  | 0           | 0.5025257   | 0.1890792   |
| 0           | 0           | 0.5688093   | 0           | 0.2609434   | 0           | 0.09963005  |
| 0.091526322 | 0           | 0.05928003  | 0.2507468   | 0           | 1.3052220   | 0.04314459  |
| 0.2370133   | 0.1700168   | 0.2493922   | 0           | AP001432.1  | 0.1138961   | 0.1170651   |
| 0.3623461   | 0.060859923 | 0.060138823 | 0.1767410   | 0.2793254   | 0.1786984   | 0.2012934   |
| 0.09895283  | 0.4329897   | 0.145538777 | 0.4048978   | 0           | 0.156787969 | 0.09190623  |
| 0.4027691   | 0           | 0.1580923   | 0.1655643   | 0.060447222 | 0.2468433   | 0.4182097   |
| 0.1549782   | 0.4252925   | 0.4421893   | 0.3619625   | 0.9175643   | 0.9562220   | 0.197514782 |
| 0.2516048   | 0.240030615 | 0           | 0.9371859   | 0.09601968  | 0.340909553 | 0.2325391   |
| 0.4563642   | 0.8080796   | 0.09822028  | 0           | 0.5608774   | 0.7474872   | 0.9015346   |
| 0.3325420   | 0.1534898   | 0.2502171   | 0.2260076   | 0.2330604   | 0.4879993   | 0.07968609  |
| 0.07239749  | 0.05081809  | 0.415642141 | 0.3593946   | 0.3018329   | 0.1276528   | 0.0587304   |
| 0.4280544   | 0.09235603  | 0.4394203   | 0.2495252   | 0.6964333   | 0.1970574   | 1.5376140   |
| 0.208019364 | 0.9064966   | 1.0622020   | 0.6265231   | 0.085597999 | 0.08755335  | 0.2012527   |
| 0.3499534   | 0.812853762 | 0.5811112   | 1.8138460   | 0.3903197   | 0.6332805   | 0.8012790   |
| 0.0542410   | 0.2609146   | 0           | 0.3167772   | 0.1450887   | 0.221208277 | 0.1080794   |
| 0.2505039   | 0.1072970   | 0.04396377  | 1.9001790   | 0.4250324   | 0.495434016 | 0.3879339   |
| 0.1536061   | 0.04048824  | 0.208707874 | 0.3393560   | 0.3818294   | 0.1782027   | 0.08435011  |
| 0.02927517  | 0.07094748  | 0.4673241   | 0.3315509   | 0.3564156   | 0.4843161   | 0.125424063 |
| 5.4536      | 0.076462155 | 0           | 0.6134014   | 0.3373784   | 0.1169313   | 0.7696641   |

0.1103450.3582876 0.2321595 0.5929090.1794654 0.1946360 0.2596356  
0.4844721 0.9207228 0.4384656 0.2186972 0.1598936 0.1395467  
0.236957149 0.08387207 0.3979809 0.2554681.2559740.220036963 0.4507668  
0.6451282 0.4362950.4308458 0.2998428 0.06471741 0.5664555 0  
0.1909970.4528877 0.1289779 0.02870852 3.5157790 0 0.1798356  
0.02922584 0.08600088 0.5552726 0.711746389 0.5815340.1792969  
0.144560131 0.2841099 0.9851951 0.2169412 0.4910727 0.09716343  
0.4343422 1.285587218 0.24541 0.3372321 0.3991420.4082231 0  
0.3484350.3957649 0.3998647 0.2263573 0.104937764 0.2278821  
0.2456528 0.7270634 0.03860702 0.4249113 0 0.7541390.1036109  
0.5070394 0.1710087 0.03680219 0.8076243 0.2078457 0.09103491  
0.2389736 0.1647724 0.5980692 1.5333310.276938254 0.4606635  
0.3636202 0.4374177 0.2526706 0.1320989 0.5981003 0 0.4920929  
0.1775880.1139355 0.3050889 0 0.07392141 0.2141522 0.4922956  
0.6851104 0.4144010.6855781 0.1630389 0.1523961 0.4411031  
0.3661729 0.8590984 0.1228196 0.1735120.335459919 0.118105398  
0.1251424 0.079092278 0.084938069 0.08094997 0.195643751 0.2798307  
0.6741742 0.30622 0.199467131 0.2306447 0.1288510.09862836 0.37740578  
0.1356850 0.3470531 0.4907553 0.1735960.4171052 0.2416404  
1.0129130.06433276 0.1248859 0.1687042 0.207746812 0.2776972  
0.676642595 0.6543067 0.6468806 0.4635575 0.2597830.2983009  
0.6328945 0.1039221 0.1211289 0.6301910.256158548 1.1346251.655508  
0.3242591 1.0222360.1696571 0.07175321 0.3235594 0.1752804  
0.3318920.3848340 0.08394219 0.1418014 0 0.241496955 0.08299918  
0.1624622 0.2194669 0.4534041 0.7251083 0.1813689 0.4848318  
0.1551316 0.04578135 0.2308308 0.362337771 0.801526454 0.23341  
0.3691683 0.2683729 0.5747169 0 0.4310699 0.3413043 0.1657369  
1.1477060 0.5556159 0.7757238 0.4125656 0.7136373 0.4992713  
0.08895183 0.2143929 0.03800344 0.148675997 0.5124174 0.2513695  
0.2783115 0 0.05019461 0.1238042 1.1561611.3003720.5301257  
0.3043886 0.7684932 0.123161412 0.04344993 0.5303196 0.04671611  
0.1830226 0.04117209 0.463387169 0.2564225 0.02942095 2.376096  
0.4101202 0.5645356 0.1194669 0.300581787 0.3895515 0.9316538  
0.2271570.1410663 0.401874723 0.1246175 0.05989828 0.5694510.105002436  
0.290314043 0.1882034 0.1924173 0.1249958 0.3040855 0.3569526  
0.1528248 0.3147285 0.07536197 0.5235528 0.5735157 0.6320498  
0.3585281 0.307853853 0.2615047 9.16108 0.09975609 1.2436980.6927579  
0.5334123 0.9996691 0.0312930.06202495 1.0332470.1045134 0.0371274  
0.4852096 0.4583215 0.05129448 0.2201623 0.2578058 0 0.5965917  
0.5332257 0.2501257 0.8352048 0.1003636 0.04192324 0.1811984  
0.1378584 0.1563747 0.2454360.5550776 0.2578332 0.4976249  
0.3002767 0.3070863 0.0355822 0.3352343 0.05811343 0.3354092  
0.5354547 0.1054316 0.1080880.9892784 0.2268919 0.1860743  
0.6036475 0.4303851 0.2904665 0.1488168 0.304242201 0.5588149

|             |             |             |             |             |             |             |
|-------------|-------------|-------------|-------------|-------------|-------------|-------------|
| 0.1578295   | 0.08294358  | 0           | 0.1509849   | 0.106553696 | 0.449969494 | 0.08673422  |
| 0.546399596 | 0.1569425   | 0.2288631   | 2.8303920   | 0.6697121   | 0.1679896   |             |
| 0.2503865   | 0.3509481   | 0.1108537   | 0.07727938  | 0.1046870   | 0.5163519   |             |
| 0.135529361 | 0.3685763   | 0.6583504   | 0           | 0.1243310   | 0.4831831   | 0.2236051   |
| 0.1462342   | 1.0070220   | 0.1846461   | 0.6947959   |             |             |             |
| AC009716.1  | 0.2604156   | 0.0764747   | 0.08607583  | 0           | 0.157146674 | 0.2309179   |
| 0.06082462  | 0.05836883  | 0.1314982   | 0.2908915   | 0.07071439  | 0.063383722 |             |
| 0.4912256   | 0           | 0.068282867 | 0.7805102   | 0.2923506   | 0.2859979   | 0.2478634   |
| 0.1802626   | 0           | 0.1935053   | 0           | 0           | 0           | 0           |
| 0.04696141  | 0.156803919 | 0           | 0           | 0.1254528   | 0           | 0           |
| 0.1283280   | 0.4312569   | 0.2442682   | 0           | 0.5889422   | 0.4344770   | 0.1504045   |
| 0.3269169   | 0.1181145   | 0.07612525  | 0.09108386  | 0           | 0.06305979  | 0           |
| 0.1478830   | 0.2223767   | 0.1150998   | 0.2396859   | 0           | 0.1435292   | 0.1086709   |
| 0.06066086  | 0.06436549  | 0.05908654  | 0.067946023 | 0.1246703   | 0.2943822   |             |
| 0.2728576   | 0.503264619 | 0.1715870   | 0           | 0.374830585 | 0.2070657   | 0           |
| 0.1133256   | 1.1456330   | 0.05234486  | 0           | 0.05681557  | 0           | 0.05912567  |
| 0           | 0.1412092   | 0           | 0.1869160   | 0.3191973   | 0           | 0.080912591 |
| 0           | 0.272683654 | 0           | 0.1247181   | 0.3104368   | 0           | 0.2677427   |
| 0.06784158  | 0           | 0           | 0.1946999   | 0.081935317 | 2.4570020   | 0.3270383   |
| 0.04407959  | 0.07638727  | 0.4469295   | 0           | 0           | 0.06066479  | 0.1549310   |
| 0           | 0.08748538  | 0.2261483   | 0           | 0.1061430   | 0.2285880   | 0.1566796   |
| 0.0365272   | 0.3033188   | 0.04172216  | 0.1025607   | 0           | 0.2453923   | 0           |
| 0.1876380   | 0.2238596   | 0           | 0           | 0           | 0.07129824  | 0           |
| 7.9109940   | 0           | 0           | 0           | 0.05618148  | 0.06045682  | 0.06642285  |
| 0.047218133 | 0           | 0.4290632   | 0           | 0.05346687  | 0.0634736   | 0.2269929   |
| 0.101797678 | 0           | 0.06294354  | 0           | 0.1142908   | 0           | 0.05058241  |
| 0.05224363  | 0.3379923   | 0.137104616 | 0.07443385  | 0           | 0.2065070   | 0.2522067   |
| 0.04765308  | 0.2463268   | 0.2707420   | 0.1419565   | 0           | 0.09616652  | 0.1678708   |
| 0.05431143  | 0.05947004  | 0.08920765  | 0           | 0           | 0           | 0.258449197 |
| 0.09501635  | 0.06350006  | 0.09432067  | 0.0575305   | 0.4341320   | 0.281349263 |             |
| 0.1607339   | 0.05800613  | 0.2605057   | 0.2391652   | 0           | 0.03219358  | 0           |
| 0.1169455   | 0.1556729   | 0           | 0.3358988   | 0.1065078   | 0.2275548   | 0.06403507  |
| 0.07973613  | 1.3095130   | 0           | 0.175315737 | 0.15430856  | 0           | 0.051668322 |
| 0.110974362 | 0           | 0.063903738 | 0           | 0.1468051   | 0.04000864  | 0.195457742 |
| 0.08417401  | 0.04295373  | 0.281767417 | 0.1772768   | 0.09186428  | 0           | 0.06411879  |
| 0.07560293  | 1.0354270   | 0.4209481   | 0           | 0.08405285  | 0.2855431   | 0.1102087   |
| 0           | 0.156009821 | 0.03716839  | 0           | 0.3785331   | 0.2036490   | 0.09187748  |
| 0.1582589   | 0.0588118   | 0.143434076 | 0.04492195  | 0.1310894   | 0.2420886   | 0           |
| 0           | 0           | 0.06039157  | 0.1145048   | 0.2168138   | 0.5656479   | 0           |
| 0.1602397   | 0.135224425 | 0           | 0.1061311   | 0.09558023  | 0           | 0           |
| 0.05278739  | 0           | 0           | 0           | 0.420805452 | 0.261805123 | 0.2613924   |
| 0.5363474   | 0.2384402   | 0           | 0.1393516   | 0.05413516  | 0.4819871   | 0.1071505   |
| 0.1319873   | 0           | 0.03850217  | 0.3107968   | 0           | 0.3486554   | 0.08003181  |
| 0.1029985   | 0.1094741   | 0           | 0           | 0.06558089  | 0           | 0.07552811  |
|             |             |             |             |             |             | 0.323615    |



|             |             |             |             |             |             |
|-------------|-------------|-------------|-------------|-------------|-------------|
| 0.1385253   | 0.2651291   | 0.1859373   | 0.201143009 | 0.1135375   | 0.4330499   |
| 0.06103612  | 0.1913      | 0.3227561   | 0.106840672 | 0.1340097   | 0.1921971   |
| 0.1241779   | 0           | 0.03882022  | 0           | 0.245449952 | 0.04626926  |
| 0.1105847   | 0.403894194 | 0.08140841  | 0           | 0.06763693  | 0           |
| 0.1912508   | 0.8260267   | 0.05443703  | 0           | 0.1165926   | 0           |
| 0.09846287  | 0.1368078   | 0.1248862   | 0.03440807  | 0.1873715   | 0.044691235 |
| 4.4256050   | 0.06516729  | 0           | 0.1005679   | 0.2489002   | 0           |
| 0.4049914   | 0.2275837   | 0           | 0.2610350   | 0.1340358   | 0.1917662   |
| 0.1400290   | 0.5567618   | 1.0904510   | 0.2614379   | 0.0454676   | 0           |
| 0.0681029   | 0.1282681   | 0.09065338  | 0.1263253   | 0.04644023  | 0.1307738   |
| 0           | 0.3185415   | 0.1518542   | 0           | 0           | 0.04591659  |
| 0.2964417   | 0.2836308   | 0.05633465  | 0.06247913  | 0.1626446   | 0.04860851  |
| 0.238501424 | 0.1095165   | 0           | 0.05418425  | 0.2392150   | 0.03945334  |
| 0.244958267 | 0           | 0           | 0.06835016  | 0           | 0           |
| 0.1375575   | 0.07241697  | 0           | 0.2279617   | 0.1927516   | 0.177073537 |
| 0.2867188   | 0.1819174   | 0           | 0.0394559   | 0.2504121   | 0.1910597   |
| 0.06031155  | 0.08252487  |             |             |             |             |
| AC068790.3  | 0.05354969  | 0.2201586   | 0.06194969  | 0.171684412 | 0.056550069 |
| 0.2908396   | 0           | 0.08401734  | 0           | 0.02326197  | 0.1526817   |
| 0.1903679   | 0.038383809 | 0           | 0.08642177  | 0.04208156  | 0           |
| 0.3373160   | 0.113680128 | 0.1392678   | 0.1404476   | 0.1457299   | 0.2544903   |
| 0.5890527   | 0.1701813   | 0.5288185   | 0.2697480   | 0.111436912 | 0.06759726  |
| 0.141066817 | 0.1570902   | 0.1410016   | 0           | 0.466277738 | 0.2186624   |
| 0.1381560   | 0.5541542   | 0.2217002   | 0.1406419   | 0.2555932   | 0.8477360   |
| 0.3608258   | 0.1344489   | 0.08500829  | 0.1095763   | 0.3277701   | 0.1498617   |
| 0.2042316   | 0.09557109  | 0.142123237 | 0.4646783   | 0.3902541   | 0.2000586   |
| 0.3313541   | 0.1150030   | 0.6079131   | 0.1549493   | 0.07821163  | 0           |
| 0.4252522   | 0.146704434 | 0.1345898   | 0.4540071   | 0.3927571   | 0           |
| 0.3784862   | 0.2303491   | 0.134884785 | 0.3228926   | 0.09219489  | 0.2039042   |
| 0.09161381  | 0.1506926   | 0.1530126   | 0.1635631   | 0.1325702   | 0.1702135   |
| 0.04547685  | 0.104003892 | 0           | 0.2355552   | 0.3026822   | 0.1240208   |
| 0.2664459   | 0.553219719 | 0.1823921   | 0.1444397   | 0.2665048   | 0.130835557 |
| 0.2659209   | 0           | 0.2234247   | 0.6741908   | 0.30281     | 0.4336392   |
| 0.3897073   | 0.1523394   | 0.1050957   | 0.707636666 | 11.140480   | 0.071899314 |
| 0.1765297   | 0.3845313   | 0.09517366  | 0.05497674  | 0.6969298   | 0.1037603   |
| 0.08422675  | 0.4366110   | 0.4387653   | 0.1372659   | 0           | 0.04069033  |
| 0.7129946   | 0.3152885   | 0.08225861  | 0.2631160   | 0.08747953  | 0.167112637 |
| 0.1577341   | 0.1559298   | 0.09008365  | 0.1845350   | 0.206906367 | 0.07064459  |
| 0.04666388  | 0.2051297   | 0.3038514   | 0.04027854  | 0.2434217   | 0.2242748   |
| 0.3407709   | 0.07697116  | 0.1935736   | 0.08085417  | 0.08098607  | 7.591502    |
| 0.2345209   | 0.1195846   | 0.3945759   | 0.1099272   | 0.08086882  | 0.3916027   |
| 0.191220936 | 0           | 0.1264481   | 0.305850549 | 0.1908256   | 0.5404024   |
| 0.07696136  | 0.2284131   | 0.2450538   | 0.402956813 | 0.2307653   | 0.6342159   |
| 0.5160697   | 0.2741876   | 0.1584638   | 0.4732611   | 0.3721479   | 0.3384027   |

|             |             |             |             |             |             |            |           |            |            |            |             |  |
|-------------|-------------|-------------|-------------|-------------|-------------|------------|-----------|------------|------------|------------|-------------|--|
| 0.2736637   | 0.246689138 | 0.2142833   | 0.4157885   | 0.2675255   | 0.1089095   |            |           |            |            |            |             |  |
| 0.3196439   | 0.1028893   | 0.6382225   | 0.09742796  | 0.1362235   | 0.2814068   |            |           |            |            |            |             |  |
| 0.1730302   | 0.2071172   | 0.5472392   | 0.08560245  | 0           | 0.6714055   | 0.2595599  |           |            |            |            |             |  |
| 0.2790639   | 0.148806915 | 0.2599042   | 0.4786899   | 0.04570167  | 0.1018254   |            |           |            |            |            |             |  |
| 0.04140531  | 0.1874697   | 0           | 0.2699244   | 0.2922334   | 0.08035231  | 0.05737658 |           |            |            |            |             |  |
| 0.15607828  | 0.2085306   | 1.0572070   | 0.1262504   | 0.1680592   | 0.2833977   |            |           |            |            |            |             |  |
| 0.4297777   | 0.07665481  | 0.06141512  | 0.6913009   | 0.2869347   | 0.1346387   |            |           |            |            |            |             |  |
| 0.3175986   | 0.1223683   | 0.063088303 | 0.138821897 | 1.3532580   | 0.185931213 |            |           |            |            |            |             |  |
| 0.199673581 | 0.1522386   | 0.137976605 | 0.5638541   | 0.1056572   | 0.3455358   |            |           |            |            |            |             |  |
| 2.063204322 | 0.5964229   | 0.6058093   | 0.06182851  | 0.202791016 | 0.06379401  | 0          |           |            |            |            |             |  |
| 0.1450413   | 0.2307349   | 0.3264734   | 0.5491006   | 0.1514804   | 0.3463521   |            |           |            |            |            |             |  |
| 0.06049374  | 0.2055084   | 0.1057579   | 0.664188723 | 0.06528143  | 0           | 0.2140039  |           |            |            |            |             |  |
| 0.1267246   | 0.05448686  | 0.2931367   | 0.6545      | 0.1983756   | 0.04886028  |            |           |            |            |            |             |  |
| 0.07593374  | 0.04232748  | 0.06882069  | 0.2263156   | 0.7075984   | 0           | 0.2883703  |           |            |            |            |             |  |
| 0.03190659  | 0.1012071   | 0.2173223   | 0.1236155   | 0.05201441  | 0.5880374   |            |           |            |            |            |             |  |
| 0.1724482   | 0.07893298  | 0.06666974  | 0.1537683   | 0.291967385 | 0.2341387   |            |           |            |            |            |             |  |
| 0.1527673   | 0.06879011  | 0.3260304   | 1.2273080   | 0.1279093   | 0.1139749   |            |           |            |            |            |             |  |
| 0.02917484  | 0.4304937   | 0.2604673   | 0           | 0.329741896 | 0.4703173   | 0.208283   |           |            |            |            |             |  |
| 0.08411928  | 0.1930075   | 0.04290198  | 0.1842482   | 0.2005857   | 0.1168852   | 0.00426    |           |            |            |            |             |  |
| 0.3084693   | 0.4749634   | 0.1620962   | 0.2216834   | 0.2982450   | 0.7756586   |            |           |            |            |            |             |  |
| 0.08364367  | 0.2879987   | 0           | 0.13980383  | 0.2223873   | 0           | 0.05234068 |           |            |            |            |             |  |
| 0.1312793   | 0.1887971   | 0.1164163   | 1.7394680   | 0.1164546   | 0.1661636   |            |           |            |            |            |             |  |
| 0.1431122   | 0.2944064   | 0.086858862 | 0.1225712   | 0.3116707   | 0.2196417   |            |           |            |            |            |             |  |
| 0.2409412   | 0.07743033  | 0.230683114 | 0.04822412  | 0.05533053  | 0.1787443   |            |           |            |            |            |             |  |
| 0.3856464   | 0.1396966   | 0           | 0.176652949 | 0.2331033   | 0.2787457   | 0.6052043  |           |            |            |            |             |  |
| 0.07958896  | 0.174412176 | 0.7030860   | 0.1689716   | 0.1460371   | 0.148104701 | 0          |           |            |            |            |             |  |
| 0.09831803  | 0.07754351  | 0.1567157   | 0.2042424   | 0.1678258   | 0.2155576   |            |           |            |            |            |             |  |
| 0.2959472   | 0.07086478  | 0.0984620   | 0.3145867   | 0.02476386  | 0.1011399   |            |           |            |            |            |             |  |
| 0.128659034 | 0.1229498   | 11.509990   | 0.09380319  | 0.1426196   | 0.07237976  |            |           |            |            |            |             |  |
| 0.3224450   | 0.3760057   | 0           | 0.05832364  | 0.04857944  | 0.7534542   | 0          | 0.5367706 |            |            |            |             |  |
| 0.1436571   | 0.6752691   | 0.0230027   | 0.09090802  | 0.1007803   | 0.4808489   |            |           |            |            |            |             |  |
| 0.4142047   | 0.1411197   | 0.2290646   | 0.1415616   | 0.1182645   | 0.1703854   |            |           |            |            |            |             |  |
| 0.2592635   | 0           | 0.2769477   | 0.3914652   | 0.4242825   | 0.1336941   | 0.2823579  |           |            |            |            |             |  |
| 0.2310089   | 0           | 0.02865722  | 0.1639366   | 0.6307877   | 0.8133490   | 0.29742    | 0         |            |            |            |             |  |
| 0.3348877   | 0.1066761   | 0.2041321   | 0.7298037   | 0.1798676   | 0.07803802  |            |           |            |            |            |             |  |
| 0.06996812  | 0.457738719 | 0.1050936   | 0.1113084   | 0.3509728   | 0.1721656   |            |           |            |            |            |             |  |
| 0.02839499  | 0.500975788 | 0.317338341 | 0.2854544   | 0.420376477 | 0.09838468  |            |           |            |            |            |             |  |
| 0.2152058   | 0           | 0.8863111   | 0           | 0.1177224   | 0.09900163  | 0.2084771  |           |            |            |            |             |  |
| 0.1271686   | 0.06562659  | 0.2427694   | 0.063720857 | 0.2475583   | 0.1238127   | 0          |           |            |            |            |             |  |
| 0.1753674   | 0.3407620   | 0.2102616   | 0.5500308   | 0.4340091   | 0.1302206   |            |           |            |            |            |             |  |
| 0.3266672   |             |             |             |             |             |            |           |            |            |            |             |  |
| AC037487.2  | 0           | 0           | 0           | 0           | 0           | 0          | 0         | 0          | 0.02395506 | 0          | 0.046977135 |  |
| 0.0280057   | 0           | 0           | 0           | 0.04333539  | 0           | 0          | 0         | 0          | 0.04780578 | 0.02892645 |             |  |
| 0.06002878  | 0           | 0.03568256  | 0.02920865  | 0.1433091   | 0           | 0          | 0         | 0.06961133 |            |            |             |  |

0.11621594 0.0647083 0 0.04648998 0.03001066 0 0 0.2134085 0  
0 0 0 0.03968156 0.05366911 0.07431534 0.0346137 0 0 0 0  
0 0 0 0.04350213 0.03653471 0 0 0.1480369 0.04471614  
0.05318868 0.08054196 0 0.09540955 0 0.10071701 0.09239993  
0.06233791 0.08089187 0 0 0 0.03388748 0.092602466 0.05115588 0  
0.08399182 0.1415152 0.03879563 0 0 0 0.04382126 0 0  
0.07849339 0 0 0 0.02628606 0 0.059968736 0 0 0.03920649 0  
0 0 0.05752042 0 0 0.06870147 0.2011244 0.04013186 0 0 0  
29.6826 0 0 0 0.06533958 0 0 0 0 0 0 0.06951359  
0.04711858 0 0 0.04264863 0 0.07492675 0.08470952 0 0.045043  
0.114727856 0 0.03211515 0 0.1520266 0 0.1818737 0 0.07041384  
0.03476719 0.04147865 0 0.05773926 0.05013203 0.02642151 0.1993411  
0.08326323 0 42.114670.08050282 0.0410492 0 0 0 0.08961569  
0.049229599 0 0 0 0 0.07950053 0 0 0.04704375 0 0  
0.04752819 0 0 0.02823571 0 0 0.07664721 0 0.03131307 0 0  
0 0.03061072 0 0.02743065 0 0.1460530.1003308 0 0 0.03563713  
0.01777402 0 0 0.03305833 0 0.04454892 0.1915857 0 0 0 0  
0.0349531 0 0.1287036 0 0 0 0 0.1181723 0 0 0 0 0  
0.1094406 0.02766144 0.03946938 0.02108166 0.09491977 0 0.1848670  
0 0 0.057183247 0 0 0 0 0.047362547 0 0.1632079 0.05930518  
0.048288132 0 0.09357893 0 0.052208302 0.06569477 0 0.07468139  
0.02376097 0 0 0 0.02972264 0 0.06046617 0 0.040234019 0  
0.038542463 0 0 0.02805515 0.1006236 0 0 0 0 0.08717726  
0.106306819 0.06658821 0 0.04485627 0.03299581 0 0 0.2237974  
0.2545972 0 0 0 0 0 0 0.1002222 0 0 0.03541986  
0.0258265 0 0 0.03912361 0 0.04433203 0 0.038985235 0.048509515  
0.0322887 0 0.08662563 0.1192549 0 0 0.04131243 0 2.0242860  
0.09782301 0 0 0.07678282 0.1261215 0 0.05931594 0.03680036  
0.035992327 0 0 0.02695009 0 0 0 2.51901 0 0.1026687 0  
0.05512332 0.029815612 0 0.06419139 0 0.03544573 0 0.079185451 0  
0 0 0 0 0.05784244 0.072766541 0.03429267 0.04100728 0  
0.02732011 0.029934802 0 0 0 0.101678336 0.080320991 0 0  
0.08069251 0 0 0.07399339 0.08707573 0 0 0.04627997 0 0  
0.033123113 0 25.718630.04829904 0 0 0 0.1548836 0 0  
0.1500806 0.06746987 0.1078561 0.02763819 0 0 0.02368806 0  
0.05189155 0.08252931 0.08979915 0.04844147 0 0 0 0.04386553 0  
0.1009495 0.04753323 0 0 0 0.09692359 0.1784188 0 0.02951106  
0 0.05413185 0.1196547 0 0.05233312 0.03831842 0 0.03003061  
0.04175269 0 0.1607264 0.03602642 0 0.05411243 0 0.0401589 0  
0 0 0.072620775 0 0.048100185 0 0.04432358 13.018750.07205675  
0.05422384 0.04040999 0 0 0.01870823 0.06758195 0 0.032809715  
0.1019738 0 0 0 0.02924292 0.06186468 0 0.04063095 0  
0.1223274

AL117336.1 1.5469470.8177086 2.5565811.417037014 2.193720658 5.349712

1.3007392.08037 0.3905693 1.91998 0.4200646 3.313360419 3.63631  
3.991801606 0.892365354 8.2029740.9030578 3.6526632.3067330.5139906  
1.219770805 0.9962153 0.6491613 0.1443379 1.1402690.2859931  
1.1237050.4594448 1.0389990.551862198 2.0085470.558877253 0.3111793  
0.5237051 0.7452274 0.721599596 0.3609562 1.5053210.7982116  
0.7623066 0.5123591.8573130.4219195 0.6360895 3.0971080.7147583  
0.3883967 1.7540890.3617654 0.8657045 0.06184592 0.3745940.5521727  
0.645175861 0.5578662 0.6442106 1.3870330.5925634 0.6644427  
0.5017552 1.0231280.3227689 0.1441374 1.3764610.9827768 0.726515389  
0.3702893 0.2498168 0.06483423 0.730776949 0.9513260.1561962  
0.3802479 2.597706491 0.8200212 0.6848567 0.4039129 0.4536935  
0.3109441 0.5893649 0.4050017 1.4224580.2809793 0.6756367  
0.343368072 0.2935887 1.1233210.6106851 0.3412113 0.9691318  
0.3848552 0.961289881 0.5519856 0.3179110.4399319 0.539940767  
0.9657295 0.6667767 1.1986570.4582603 0.1817682 1.5968481.853796  
0.8363001 0.7544212 0.2891439 1.119456561 5.5462240.652781386  
0.8742173 0.3967273 0.6807994 0.8167738 0.4424824 0.8564093  
0.4866295 0.2882936 0.7976248 1.44858 0.9818950.4157514 0.4701859  
0.1367302 0.3783128 1.4813130.6110464 0.6825307 0.8664390.827581684  
0.2169825 0.6177613 0.8426631 0.7920131 0.910799768 0.4664652  
0.3851512 0.6772342.0063270.2659586 0.7031981 1.1106620.7232481  
0.2964730.3834490.4004091 0.5347498 9.7019180.1290448 0.1974038  
2.6984280.2268274 0.4672287 5.5306260.236742935 1.0029771.600291  
0.841469422 1.8900281.6566960.6061401 0.8257839 1.2065671.618087  
0.423296018 0.7618698 0.7478068 0.6195638 0.8599669 1.046334  
1.2619930.8109046 0.6827541 1.1544710.651553878 1.0611821.525247  
1.1776450.9588371.6269241.1889090.9364831 0.6433154 0.5621759  
2.3226561.08539 0.8547449 1.8067060.2826158 0.5299201 0.08525539  
0.4284675 0.84455 0.552695535 0.9295777 1.1288510.4526512 0.3361757  
0.6834967 0.2578874 1.615588651 1.2730760.4134885 0.4421376  
0.2841425 2.189987919 1.1091890.9141420.7641604 0.9247435 0.4678177  
0.4434087 0.7592259 0.6082847 0.6086199 1.2315070.7408477  
1.6681470.8753291 0.728999466 1.008302803 0.9712545 0.306925256  
0.593298752 0.5026147 0.227764367 0.62052 1.4825130.3327286 1.470697952  
0.7160312 1.9500730.5103159 0.334756513 0.5265387 0.2182805  
1.6161281.7901580.9880288 0.7769363 0.5001115 0.7623193 3.495093  
0.2907791 0.5673831 1.031912524 2.1552620.432480956 1.1039571.087789  
0.1349160.1612981 0.8488962 0.1637339 0.7259033 1.7548631.048079  
4.032995131 0.2668498 0.5450972 0.3954716 0.3702426 0.5266968  
0.2784453 1.4349760.2040578 1.6743211.5680550.6405036 0.8469391  
1.1005480.5711228 0.321309381 0.8159522 1.38699 0.6813301 0.413995  
0.7503608 0.1407639 0.2508583 0.9632052 4.1216881.2182350.874898499  
0.311040117 1.3457160.3438224 0.9720171 1.5930321.4872260.5474647  
1.9535850.5788422 1.6542631.14571 1.8817060.3121763 0.3202001

7.6310661.4488910.4142234 0.3803303 1.2977892.538587166 2.141446  
0.5852782 0.4320059 0.3611815 0.5453981 1.0889840.3589276  
0.8650663 0.6034465 0.7874731.89978 0.525733788 1.2814490.2057957  
1.5228061.8182070.9586337 0.59235445 0.9552694 0.3196784 0.6884768  
1.5915110.6918112 0.4636028 1.924620696 0.6596477 2.0377560.5289029  
1.1824310.62380554 1.8376430.4648822 0.8839239 1.629888551 0.836896771  
0.7790309 0.3413458 1.4875120.5394438 0.8311136 1.3047130.2093716  
0.5848989 0.6501431 2.8190720.4496673 0.7791298 0.796437829  
0.8794886 6.33336 1.47103 0.6592007 0.4779225 0.8279832 1.365518  
1.3600780.6739427 0.4009616 0.8111489 0.7491977 0.5316432  
0.4742830.1592426 0.4176877 0.7503304 0.4159069 0.9260528  
0.3598668 0.7765095 0.9183097 0.3894705 0.3253744 1.546947  
0.6419674 0.2427309 0.3047802 0.6462097 0.4002187 0.3862163  
0.2330506 1.7636840.05523207 1.0407282.1649420.7809529 1.342633  
0.6000682 1.3422270.5528147 2.7588250.09627724 0.2677157 0.5938315  
0.7085153 0.5197483 1.605672273 1.5613450.9187092 3.0255840.1894678  
0.4218563 0.220529043 3.783325595 1.4136380.385519389 0.5684285  
0.6394503 0 0.2695138 0.34768 1.1659791.3618880.8603568 0.6897473  
1.51666 0.2862505 0.262967416 1.0625060.4768946 0.7204293 1.929914  
0.4218837 0.2479204 0.8171652 0.7164388 0.6448835 0.5882668  
LINC00641 1.1995469.1230911.0580176.268518829 0.960327036 2.0785235.549036  
4.4632395.5266757.23888 0.9406066 1.522872944 3.37096 1.868206834  
6.020219042 3.6501972.1011181.0008420.8199225 2.2420950.335500591  
1.2981841.6688660.8488952 0.9885268 1.7133061.07037 1.4139082.022874  
0.460072928 1.3932130.565111448 0.6384212 0.8970746 0.3931514  
0.707794716 0.4231683 0.3685251 1.3368371.5550260.2831710.4116699  
1.11912 1.8270181.6540791.2185180.8000944 1.5752120.4930359 0.7294678  
0.7069265 0.6367769 0.6380938 0.422881911 0.4823371 1.071071  
0.6581805 0.7908821 1.4299511.3319312.18403 0.5865188 2.3277  
0.7889193 0.1604797 0.525235244 0.1779851 3.0576011.7443980.576344884  
1.5016590.5859747 0.8374388 0.426360225 1.0550870.2274867 0.765538  
2.0167461.3342030.7995208 1.7646930.8081561 0.3252895 0.5038541  
0.130828342 0.4916996 0.6154111 1.4709290.5160262 1.6993080.9152637  
0.493050038 0.3294440.1770344 0.9504641.38627312 1.7342880.1476541  
0.5188613 0.3530454 0.3542731 1.1200140.3118220.9050211.297191  
0.8576166 0.396572671 10.788410.281766053 1.1615441.6371680.8748816  
0.4734541 0.5784016 1.4959810.1915256 0.0168991 1.0106250.3331179  
1.5673050.8590559 0.5984719 1.46671 4.3021081.9971161.0029070.6546823  
2.0696370.409647704 0.6232314 0.5612819 0.7002461 0.5356842  
0.340354638 0.8442183 0.8940359 0.5954682 0.9800516 0.4248241  
0.3533129 0.7487009 0.3627138 1.0327830.7454835 0.3872724  
1.0944919.40731 0.4992442 0.4859967 1.22177 0.4573857 0.08607612  
0.5978613 0.828013422 1.7167322.1738370.40446483 1.4107140.8291843  
0.4618968 1.4409950.4641403 1.1065660.935790521 0.6609537 0.1797222

|             |             |             |             |             |             |             |
|-------------|-------------|-------------|-------------|-------------|-------------|-------------|
| 0.5175228   | 1.2310470   | 0.8778381   | 0.04622     | 0.6193739   | 0.5057257   | 1.009201    |
| 0.606307081 | 1.03155     | 1.5467320   | 0.4170610   | 0.4074848   | 1.7784560   | 0.4446954   |
| 1.8561190   | 0.8767493   | 1.2423450   | 0.5056951   | 0.5123328   | 3.5489740   | 0.3101501   |
| 0.7206333   | 0.8169485   | 1.1294290   | 0.21767     | 0.4995561   | 0.755946941 | 0.611961    |
| 4.3143240   | 0.6987118   | 1.2710271   | 1.1458590   | 0.1602376   | 0.522494052 | 0.6678917   |
| 0.5453490   | 0.5779508   | 0.5052252   | 1.872720872 | 1.47748     | 1.1739960   | 0.9325151   |
| 0.85917     | 0.6444263   | 0.4516830   | 0.6564348   | 0.6319076   | 1.6812260   | 0.5053164   |
| 1.2202921   | 0.102253    | 1.2038060   | 0.714239072 | 0.556118332 | 1.3379180   | 0.636890046 |
| 0.622136059 | 0.5524145   | 0.458384921 | 0.6074365   | 1.8198180   | 0.8720974   |             |
| 0.367522116 | 1.8100460   | 0.5803367   | 0.9841551   | 0.63283039  | 0.3271634   |             |
| 0.8444762   | 0.7859384   | 1.2592190   | 0.2843146   | 0.6262053   | 1.3191920   | 0.8127154   |
| 0.8897395   | 0.1164728   | 1.1794040   | 0.937568815 | 0.4105934   | 0.452696914 |             |
| 1.9724031   | 0.2433920   | 0.2029838   | 0.5483853   | 0.5926002   | 1.3948660   | 0.4869698   |
| 0.5584152   | 1.3843570   | 0.945619156 | 1.0010950   | 0.8535836   | 1.0368511   | 0.209154    |
| 0.1914172   | 0.6724588   | 0.4920724   | 0.4704815   | 0.7776086   | 4.245631    |             |
| 0.8134713   | 1.1685810   | 0.2322417   | 0.2678231   | 1.261905347 | 0.9087551   |             |
| 0.9904079   | 1.6607551   | 0.2133711   | 0.7813680   | 0.6188440   | 0.2867422   | 0.6492998   |
| 0.7248113   | 0.9535351   | 0.080637973 | 0.624461336 | 1.2863950   | 0.7860087   | 2.161071    |
| 1.54637     | 0.6725139   | 0.5134577   | 2.3970430   | 0.1885021   | 0.5930029   | 0.544733    |
| 1.7096691   | 0.50575     | 1.2763181   | 0.9479860   | 0.5569869   | 0.3156506   | 1.3794460   |
| 0.426126478 | 2.6468170   | 0.4726831   | 1.1446080   | 0.4191980   | 0.05480566  | 0.4693656   |
| 1.4043871   | 0.7297121   | 0.1640810   | 0.7477894   | 1.2146080   | 0.282958764 | 1.1544071   |
| 0.5440812   | 0.3896797   | 0.5581826   | 0.910223945 | 1.0779170   | 0.2998208   |             |
| 0.8676735   | 0.2285621   | 0.5920645   | 0.4837207   | 0.444429764 | 0.5638939   |             |
| 2.9207081   | 0.3779140   | 0.8753765   | 1.322002589 | 0.6576489   | 0.7085081   | 0.2072542   |
| 1.442658134 | 0.275473592 | 0.6469206   | 0.5177301   | 0.5989883   | 1.003965    |             |
| 1.2098290   | 0.3337276   | 1.2968340   | 0.2742833   | 0.6034064   | 0.9175582   | 0.5798859   |
| 1.9344840   | 0.650482293 | 0.3212184   | 5.2604970   | 0.8532069   | 0.6072127   | 0.8124264   |
| 0.9637555   | 0.6076029   | 0.1907696   | 1.29802     | 1.9930920   | 0.6815165   | 0.4324059   |
| 4.9628170   | 0.7019845   | 1.2321450   | 0.5720326   | 1.0731760   | 0.2535468   | 1.647879    |
| 0.5252543   | 0.5371027   | 0.5097940   | 0.4246353   | 0.3967119   | 0.4492705   |             |
| 0.7149821   | 1.3232340   | 0.2367180   | 0.6376351   | 1.1993872   | 0.1183731   | 0.6893960   |
| 0.3885090   | 0.2662037   | 2.9240771   | 0.3224651   | 0.4653560   | 0.4125021   | 0.2311173   |
| 0.7669114   | 1.0804      | 0.3527217   | 0.4550933   | 1.4358721   | 0.87647     | 0.382523    |
| 0.370946572 | 1.0830150   | 0.2154104   | 1.3697660   | 0.5608612   | 0.9534107   | 0.46213665  |
| 0.644838172 | 0.3314568   | 0.320895142 | 1.2423581   | 0.2536010   | 0.4506837   | 1.085567    |
| 0.5324326   | 0.7328315   | 1.73073     | 0.5648397   | 1.0019950   | 0.7048744   | 1.016828    |
| 0.521011383 | 0.4120168   | 2.1484990   | 0.5405426   | 0.4525083   | 1.1787890   | 0.3836584   |
| 0.7743886   | 2.7564630   | 0.8106337   | 1.103451    |             |             |             |
| AC015908.2  | 0.4208563   | 0.0393242   | 0.1549142   | 0.204439018 | 0.080806688 |             |
| 0.2968518   | 0.2814907   | 0.3601674   | 0.06761794  | 0.06647994  | 0.1454487   |             |
| 0.293333969 | 0.8355034   | 0.329089095 | 0.17555931  | 0.06174578  | 1.713763    |             |
| 0.4411905   | 0.8284529   | 0.01853864  | 0.12183161  | 1.3930380   | 0.04013825  | 0           |
| 0.2857262   | 0.2228086   | 1.5198692   | 0.2470650   | 0.09636346  | 0           | 0.2414812   |

|             |             |             |             |             |             |             |             |            |   |
|-------------|-------------|-------------|-------------|-------------|-------------|-------------|-------------|------------|---|
| 0.141103269 | 0.06734177  | 0.02518536  | 0.1612734   | 0.062464048 | 4.113999    |             |             |            |   |
| 0.1916258   | 0.2467709   | 0.06598778  | 0.03167963  | 0           | 0.3652275   | 0.3854341   |             |            |   |
| 0.4840621   | 0.6444983   | 0.02401493  | 0           | 0           | 0.6088733   | 0.02676794  |             |            |   |
| 0.01621305  | 0.03414135  | 0           | 0           | 0           | 0           | 0.5957051   | 0.09307197  | 0          | 0 |
| 0.1247701   | 0           | 0.0303830   | 0.09616039  | 0.02162497  | 0.02806133  | 0.08626155  |             |            |   |
| 0.2941069   | 0           | 0.1410665   | 0           | 0.01774594  | 0.5598994   | 0           | 0.4254598   |            |   |
| 0.5652433   | 0.1822049   | 0           | 0.04735872  | 0.03040312  | 0.01624593  | 0.037153845 |             |            |   |
| 0           | 0           | 0           | 0.2362910   | 0.4521232   | 0.020803108 | 0.02171895  | 0.03439929  |            |   |
| 1.9040980   | 0.186956235 | 3.0398820   | 0.03206578  | 0.07981515  | 0.02833466  | 0           | 0           |            |   |
| 0.2093097   | 0.3619645   | 0.1306104   | 1.0261990   | 0.042132114 | 5.11685     | 2.054796941 |             |            |   |
| 0.2522505   | 0.03434202  | 0.0906650   | 0.1532110   | 0.7221301   | 0.06238911  |             |             |            |   |
| 0.05311157  | 1.6397660   | 0.2288356   | 0.04498602  | 0           | 0           | 0           | 0.6931209   |            |   |
| 0.3232423   | 0.1074220   | 0.596985065 | 0.5446989   | 0.3119402   | 0           | 0.6064859   |             |            |   |
| 0           | 0           | 0.03333996  | 1.7098550   | 0           | 0.9130673   | 3.5652880   | 0.03478152  |            |   |
| 0.0549936   | 0           | 0           | 0.01928738  | 0.04374115  | 0.02792637  | 0.02847987  |             |            |   |
| 0.04027326  | 0.01963493  | 0.4911161   | 0.03108761  | 0           | 0.1736421   | 0.2710302   |             |            |   |
| 0           | 0.05453568  | 0.05515735  | 0           | 0.2474397   | 0.4243054   | 0.05836123  | 0           | 0          |   |
| 0           | 0.2346378   | 0.05876967  | 2.4907880   | 0.07803023  | 0.05317772  | 0           | 0.02172496  |            |   |
| 0           | 0.4975720   | 0.04247534  | 0           | 0.3045014   | 0           | 0           | 0.2784375   | 0.07299571 |   |
| 0.0287224   | 0.04944997  | 0.2219686   | 0.1954931   | 0           | 0           | 0.7379989   | 0           |            |   |
| 0.06646095  | 0.186056708 | 0.2785407   | 0           | 0.06530497  | 0.09700162  | 0.02958287  |             |            |   |
| 0           | 0.024112189 | 0.02755042  | 0.02982744  | 0.09568223  | 0           | 0.278783232 |             |            |   |
| 0.03310864  | 0           | 0.03006739  | 0.02001221  | 0.2784090   | 0.3262548   | 0           | 0.04387928  |            |   |
| 0.3292761   | 0.5580480   | 6.2917280   | 0.08742851  | 0           | 0           | 0           | 0.026568465 | 0          |   |
| 0.1903475   | 0           | 0.05371427  | 0.1887223   | 0.8434897   | 0           | 0.1162163   | 0           | 0          |   |
| 0.253554271 | 0.04557893  | 0.0472377   | 0.4145107   | 0           | 0.1166278   | 0.08406772  |             |            |   |
| 0           | 2.7426630   | 0.6915356   | 4.8034280   | 0.2077924   | 0.167485802 | 0.7929080   | 0.080222104 |            |   |
| 0.4204735   | 0.1991902   | 0           | 0.4886874   | 0           | 0.1889780   | 0.1745461   | 0.7052812   |            |   |
| 0.06048345  | 0.688384728 | 0.1616958   | 0.06740773  | 0           | 0.4807413   | 0.02279631  |             |            |   |
| 0.02410315  | 0.3726487   | 0.02943986  | 0.1858138   | 0.2262267   | 0.03080228  |             |             |            |   |
| 0.2819763   | 0.04763355  | 0.05493142  | 0.069534007 | 0           | 0           | 2.7277410   |             |            |   |
| 0.06495372  | 0.09138742  | 0.2985829   | 0.06253367  | 0.2153025   | 0.1240641   | 0           |             |            |   |
| 0.033655827 | 0.4032333   | 1.73614     | 1.0517630   | 0.02757962  | 0           | 2.5011570   | 0.04299375  |            |   |
| 0.05567389  | 0.08261449  | 0           | 0           | 0           | 0.2771758   | 0.2663590   | 0           | 0.1028833  |   |
| 0.05106406  | 2.247427856 | 0.2648152   | 0.02814645  | 0.3178648   | 0           | 0.03372248  |             |            |   |
| 0.3881545   | 2.3690850   | 0.08320334  | 0.3324130   | 0.01912224  | 0.248232303 |             |             |            |   |
| 0.2919117   | 0.1336077   | 0.0313855   | 0           | 0.02766083  | 0.091564572 | 0.08613674  |             |            |   |
| 0.1185961   | 2.6392880   | 0.0998091   | 0.4013099   | 0           | 0.0713766   | 0.3983110   |             |            |   |
| 0.1326825   | 0.269993354 | 0.7535011   | 0           | 2.1215630   | 0           | 0.02809812  | 0           |            |   |
| 0.02799217  | 0           | 0.02997664  | 0           | 0.60413     | 0           | 0.02344939  | 0.7706154   | 0          | 0 |
| 0.091923057 | 0           | 0.1034409   | 0.06701959  | 0.1018975   | 0           | 0.05119498  |             |            |   |
| 0.2149159   | 0.08409488  | 0.04167051  | 0.2776685   | 0.04681049  | 0           | 0           |             |            |   |
| 0.1539581   | 0.03446141  | 0.04930423  | 0.1299022   | 0           | 0.1145174   | 0.01557563  |             |            |   |
| 0           | 1.0053390   | 0.3943168   | 0.03043383  | 0           | 1.5758690   | 0           | 0.1948739   |            |   |

|             |             |             |             |             |             |            |
|-------------|-------------|-------------|-------------|-------------|-------------|------------|
| 0.04776023  | 0.2689817   | 0.06189336  | 0           | 0           | 0.1952131   | 0.03755659 |
| 0.4427533   | 0.09444343  | 0.1089259   | 0.9038988   | 0.02540564  | 0.02083519  | 0          |
| 0.8995703   | 0           | 0.4499113   | 0           | 0.01877156  | 0.02650884  | 0.2507596  |
| 0.2870168   | 0           | 0           | 0.025192091 | 0.1456776   | 0.200231001 | 0.1757323  |
| 0.06150326  | 0           | 0           | 0.01881021  | 0.08410916  | 0.02357791  | 0.2606637  |
| 0.2076759   | 0.04688825  | 0.1982303   | 0.113816647 | 0.2829969   | 0.05897368  | 0          |
| 0.04176493  | 0.1623096   | 0.02146081  | 0.2947355   | 0           | 0.06202583  | 0.0636529  |
| ITFG1-AS1   | 0.09461015  | 0.04862129  | 0.1368138   | 0           | 0.099911144 | 0.1101102  |
| 0.07734249  | 0.0371099   | 0.08360429  | 0.06164793  | 0.1798360   | 0.080596554 |            |
| 0.1921925   | 0.067815484 | 0.086826138 | 0.07634383  | 0.1115229   | 0.04545813  |            |
| 0.02626454  | 0.3896667   | 0.200846999 | 0.1230273   | 0.4714641   | 0.07724151  |            |
| 0.3532781   | 0.1530474   | 0.1252799   | 0.2212821   | 0.07943058  | 0.098441872 |            |
| 0.2090008   | 0.07476992  | 0.05550856  | 0.5605150   | 0.4386842   | 0.102975874 |            |
| 0.1287756   | 0.04738606  | 0.4881805   | 0.08158873  | 0           | 0.0931809   | 0.4515752  |
| 0.2042396   | 0.3222718   | 0.2549990   | 0.1501904   | 0.1451974   | 0.1158191   |            |
| 0.03309646  | 0.1603693   | 0.04221311  | 0.06277488  | 0.1119520   | 0.1567024   |            |
| 0.1767291   | 0.02439282  | 0.1523882   | 0.2685111   | 0.5018938   | 0.1036367   |            |
| 0.1157014   | 0.1636899   | 0.3005296   | 0.302392366 | 0           | 0.5614893   | 0.06939126 |
| 0.106655654 | 0.1818201   | 0           | 0.1744177   | 0.03971847  | 0.06582438  | 0.1221656  |
| 0.1080757   | 0.2023260   | 0.2995196   | 0.09011284  | 0.3612236   | 0.05855535  | 0          |
| 0.1807814   | 0.045937821 | 0.04488919  | 0.1618449   | 0.2673854   | 0           | 0.2029402  |
| 0.05884368  | 0.180049902 | 0.1342689   | 0.04253203  | 0.1008972   | 0.173367563 |            |
| 0.04698219  | 0.07929364  | 0.1480278   | 0.07006719  | 0.07295409  | 0.2062690   | 0.34506    |
| 0.06885243  | 0.05382984  | 0.2166270   | 2.1869680   | 0.2599066   | 0.382151    |            |
| 0.02802504  | 0.09713142  | 0.28415     | 0.3666417   | 0.3720239   | 0           | 0.1313366  |
| 0.08944601  | 0.04041961  | 0.1112434   | 0.2875624   | 0.07317034  | 0.247441    |            |
| 0.02142474  | 0.1816654   | 0           | 0.03863912  | 0.246041768 | 0.04644673  | 0.1928448  |
| 0           | 0.09780944  | 0.121852205 | 0.1872195   | 0.3710002   | 0.1208059   | 0.05964851 |
| 0.2134891   | 0.2687944   | 0.07429549  | 0           | 0.09066038  | 0.1026002   | 0.142851   |
| 0.1669314   | 1.29798     | 0.03452876  | 0.1760657   | 0.04979473  | 0.04855412  |            |
| 0.03571921  | 0.0384374   | 0.168922009 | 0.2146948   | 0.1861709   | 0.240163797 |            |
| 0.1685728   | 0.2045932   | 0.1081240   | 0.1359733   | 0.04035542  | 0.2164773   |            |
| 0.097081811 | 0.2853969   | 0.04001841  | 0.1243334   | 0.1695495   | 0.06999238  |            |
| 0.09647827  | 0.1052001   | 0           | 0.1074448   | 0.043584375 | 0.2839425   | 0.04081133 |
| 0.2100697   | 0.06413946  | 0.2353076   | 0.1514850   | 0.2505765   | 0.08606655  |            |
| 0.2406760   | 0.1065390   | 0.09171152  | 0.1372234   | 0.03453027  | 0.1512401   | 0.1417917  |
| 0.4106150   | 0.1528611   | 0.6984770   | 0.098590524 | 0.2295959   | 0.6343024   | 0.161489   |
| 0.3298210   | 0.0365769   | 0.1932095   | 0.089438504 | 0.03406394  | 0.0368793   |            |
| 0.09464287  | 0.1520571   | 0.068938729 | 0.1023406   | 0.08894498  | 0.1858799   |            |
| 0.1732047   | 0.03129372  | 0.04745748  | 0.1015738   | 0.1808443   | 0.2442744   |            |
| 0.3041691   | 0.2775220   | 0.07651701  | 0.3242955   | 0.111462721 | 0.171686761 |            |
| 0.2598804   | 0.065699655 | 0.035277792 | 0           | 0           | 0.2324472   | 0.2800085  |
| 0.3052417   | 0           | 0.1436924   | 0.2140655   | 0.08192771  | 0.447857156 | 0.2254191  |
| 0.1168114   | 0.1601594   | 0.2038281   | 0.09613408  | 0           | 0           | 0.3824535  |



|            |             |             |             |             |             |            |           |
|------------|-------------|-------------|-------------|-------------|-------------|------------|-----------|
| 0.05343935 | 0.07780431  | 0.2569190   | 0.069027695 | 0.05766874  | 0.099188353 |            |           |
| 0.2126792  | 0.2686724   | 0.1203324   | 0           | 0.08259664  | 0.1168282   | 0.1726501  |           |
| 0.03353942 | 0.2617407   | 0.091192911 | 0.3998484   | 0.2500332   | 0.1731552   |            |           |
| 0.1981330  | 0.02818585  | 0.1192066   | 0           | 0.1820004   | 0.1378465   | 0.1198764  |           |
| 0.3427615  | 0.1045925   | 0           | 0.06791841  | 0.085973357 | 0.1838534   | 0.06747629 |           |
| 0.1519207  | 0.1329281   | 0.2007755   | 0.07532893  | 0.06712262  | 0.1030907   |            |           |
| 0.3042339  | 0.03834888  | 0.234098241 | 0           | 0.0830944   | 0.06133147  | 0.03715492 |           |
| 0.2046003  | 0           | 0.09765743  | 0.1063168   | 0           | 0.3064391   | 0.06812441 |           |
| 0.2517458  | 0.2147904   | 0.1468741   | 0.1975992   | 0.1803175   | 0.1477794   |            |           |
| 0.02544142 | 0.1578418   | 0.092625621 | 0.3601656   | 0.1044027   | 0.0924741   |            |           |
| 0.0386568  | 0.1250856   | 0.03428019  | 0.5762336   | 0.1543116   | 0.176144    |            |           |
| 0.5478347  | 0.2364315   | 0.127883255 | 0.07218519  | 0           | 0.1552228   | 0.03040632 |           |
| 0.03420046 | 0.158497397 | 0.3195040   | 0.1221956   | 0.5789678   | 0           | 0.1480874  |           |
| 0.09923766 | 0           | 0           | 0.9146064   | 0.2201415   | 0.04687188  | 0.25678896 |           |
| 0.05175806 | 0.04975576  | 0           | 0.305278646 | 0.344507764 | 0.1215940   | 0.1826691  |           |
| 0.03461013 | 0.1804250   | 0.2223826   | 0           | 0.1867399   | 0.1878030   | 0.17396    | 0.1588009 |
| 0.04375212 | 0.1191276   | 0.056827832 | 0           | 3.32531     | 0.1242967   | 0.2015812  |           |
| 0.03196966 | 0.1265972   | 0.1660792   | 0.1299709   | 0.1545670   | 0.04291443  | 0.23151    |           |
| 0.2775659  | 0.2133792   | 0.0634524   | 0.3408707   | 0.1625622   | 0.3212277   | 0          |           |
| 0.7079591  | 0.2118385   | 0.1662177   | 0.02890751  | 0.04168454  | 0           | 0.2634034  |           |
| 0.05725748 | 0.2164932   | 0.1223259   | 0           | 0.1338591   | 0.2362072   | 0.2078593  |           |
| 0.2040701  | 0.08867129  | 0.0253154   | 0.09654628  | 0.2321789   | 0.1368574   |            |           |
| 0.2335438  | 0.1346784   | 0.1314824   | 0.06282417  | 0.2060887   | 0.5730656   |            |           |
| 0.3177852  | 0.1723443   | 0.09271335  | 0.202180121 | 0.09283825  | 0.1638805   |            |           |
| 0.3444941  | 0           | 0.07525125  | 0.236029487 | 0.124592192 | 0.0720476   | 0.08252332 |           |
| 0          | 0.1901099   | 0           | 0.3502695   | 0.3721176   | 0.1386592   | 0.1166089  | 0         |
| 0.09629061 | 0.1449341   | 0.2144593   | 0.05629015  | 0           | 0.3645817   | 0.11566    |           |
| 0.1032781  | 0.1003415   | 0.1592077   | 0.1700615   | 0.2091261   | 0.03834504  |            |           |
| 0.3672752  |             |             |             |             |             |            |           |

|             |             |             |             |             |             |             |          |
|-------------|-------------|-------------|-------------|-------------|-------------|-------------|----------|
| AC138932.6  | 0.4733868   | 0.1081241   | 0.1216987   | 0.168634956 | 0.194409695 |             |          |
| 0.2856737   | 0.04299858  | 0.1650501   | 0.04647983  | 0.1370927   | 0.2499496   |             |          |
| 0.134423027 | 0.1869865   | 0.527828513 | 0.434439131 | 0.6366506   | 0.2066706   |             |          |
| 0.05054492  | 0.02920356  | 0.2803516   | 1.004948484 | 0.3191863   | 0.4966306   |             |          |
| 0.3149112   | 0.9998802   | 0.2722776   | 0.1671585   | 0.8474839   | 0.08831891  |             |          |
| 0.145943427 | 0.2987847   | 0.526532522 | 0           | 0.6232369   | 0.5764592   | 0.228997859 |          |
| 0.2505750   | 0.5795744   | 1.0177650   | 0.2721557   | 0.08710493  | 0.1726798   | 0.3138167   |          |
| 0.7191314   | 0.1535718   | 0.6379503   | 0.2311064   | 0.3339935   | 0.161445    |             |          |
| 0.8370655   | 0.1471999   | 0.1783147   | 0.1408103   | 0.383896826 | 0.3319452   |             |          |
| 0.3833224   | 0.3930103   | 0.1084895   | 0.5648016   | 0.3838599   | 1.369774    |             |          |
| 0.1920561   | 0.1715312   | 0.1820069   | 0.5430085   | 0.672460465 | 0           | 1.27837     |          |
| 0.3086247   | 0.158120638 | 0.4043316   | 0           | 0.2585801   | 0.441629878 | 0.1219836   |          |
| 0.3622293   | 0.2002824   | 0.2699597   | 0.9251001   | 0           | 0.1204934   | 0.1302155   |          |
| 0.08359509  | 0.08933819  | 0           | 0.1746931   | 0.1542475   | 0           | 0           | 1.429112 |
| 0.3271416   | 0.257396891 | 0.05971748  | 0.07093708  | 0.1121877   | 0.064255828 |             |          |

|             |             |             |             |             |             |             |
|-------------|-------------|-------------|-------------|-------------|-------------|-------------|
| 0.3656767   | 0.04408332  | 0.3840484   | 0           | 0.1081569   | 0.9501670   | 0.8038491   |
| 0.2394137   | 0.1376387   | 0.46337842  | 5.3844570   | 0.423733437 | 0.1155961   |             |
| 0.4721266   | 0.4362549   | 0.3240014   | 0.6582221   | 0.1019173   | 0.1654614   |             |
| 0.04288559  | 0.1460332   | 0.4641236   | 1.39322     | 0           | 0.4396435   | 0.569507    |
| 0.2751298   | 1.2387540   | 0.2423926   | 0.07384072  | 0.6874057   | 0.164144384 |             |
| 0.1032883   | 0.2450563   | 0.2064617   | 0.3625146   | 0.135487532 | 0.1734745   |             |
| 0.2750102   | 0.4701343   | 0.1658080   | 0.2373787   | 0.2390981   | 0.7710191   |             |
| 0.2869012   | 0.1764093   | 0.2661894   | 0.07941804  | 0.2651587   | 5.23169     | 0           |
| 0.3915350   | 0.05536678  | 0.2969304   | 0.1985811   | 0.5128628   | 0.281736708 |             |
| 0.2387193   | 0.4968084   | 0.534076507 | 0.5997956   | 0.6824620   | 0.4408183   |             |
| 0.7559437   | 0.1346136   | 0.1604675   | 0.323835954 | 0.09066657  | 0.4894615   |             |
| 0.09216424  | 0.4578397   | 0.6225965   | 0.6078874   | 0.6725895   | 0.332392    |             |
| 0.2688029   | 0           | 0.05261931  | 0.2722688   | 0.7007299   | 0.0713167   | 0.9157353   |
| 0.2358108   | 0.5224054   | 0.1913949   | 0.1672548   | 0.1184608   | 0.4078963   |             |
| 0.4407832   | 0.07678845  | 0.2942869   | 0.2207216   | 0.2029169   | 0.2549496   |             |
| 1.1877980   | 0.146163808 | 0.2552878   | 0.3694330   | 0.1795597   | 0.1000168   | 0.1626795   |
| 0.3375897   | 0.132595626 | 0.53026     | 0.2870428   | 0.2104669   | 0.6199321   |             |
| 0.306612038 | 0.1593096   | 0.6922858   | 0.3720238   | 0.6052717   | 0.278364    |             |
| 0.6859840   | 0.2211890   | 0.09053627  | 0.4509411   | 0.6612362   | 0.1985184   |             |
| 0.08012986  | 0.371806376 | 0.136356144 | 1.0980520   | 0.328731669 | 0.196126981 |             |
| 0.1495346   | 0.135525866 | 0.4799937   | 0.3632318   | 1.4990090   | 0.322406908 |             |
| 1.3846870   | 0.2082671   | 0.3340167   | 0.547769872 | 0           | 1.42871     | 0.2849301   |
| 0.2039729   | 0.7482407   | 0.8475460   | 0.9671340   | 0.1134001   | 0.3565155   | 0.6055746   |
| 0.5193970   | 0.307007722 | 0.3206095   | 0.294100219 | 0.5517823   | 0.2987370   | 0.2943549   |
| 0.57586     | 0.3214374   | 0.8118836   | 0.5759091   | 0.0745850   | 0.2910296   | 0.371790635 |
| 0.3493220   | 0.8340360   | 0.1925314   | 1.1329930   | 0.06267972  | 0.3976377   | 0.2561546   |
| 1.9022440   | 0.2299074   | 0.6664531   | 1.0586570   | 0.6202478   | 0.3929133   | 0.4153518   |
| 1.465771925 | 0.2810866   | 0.4501616   | 0.4054096   | 0.1724366   | 0.04464847  |             |
| 0.04187914  | 0.3731684   | 0.2865664   | 0.9725488   | 0.8101627   | 0.632142471 |             |
| 0.416423602 | 0.6159514   | 1.7730570   | 0.2065629   | 0.8720647   | 0.1685598   |             |
| 0.2533658   | 0.09851144  | 0.2678873   | 1.32506     | 0.6817281   | 0.6997907   |             |
| 0.3184341   | 1.1431660   | 0.1464738   | 0.4410892   | 0.2464740   | 0.5374783   | 0.3510087   |
| 0.343301591 | 1.34703     | 0.1160854   | 0.3084660   | 0.1719301   | 0.2781655   | 1.029136    |
| 1.4416080   | 0.1715792   | 0.5222789   | 0.5154242   | 1.0778420   | 0.170632151 | 0.4013138   |
| 0.3673617   | 0.2588885   | 0.1014264   | 0.4563301   | 0.302114297 | 0.5447269   |             |
| 0.1630433   | 0.7900625   | 0.1420487   | 0.5763045   | 0.4413696   | 0.069406096 |             |
| 0.3925079   | 1.0169510   | 0.8741980   | 0.1563506   | 0.285523782 | 0.1726495   | 0.1659704   |
| 0.3825151   | 0.484913557 | 0.68950506  | 0.1738291   | 0.7870506   | 0.1154491   | 0           |
| 0.08242246  | 0           | 0.2491634   | 0.1044091   | 0.2256640   | 0.7504261   | 0.462156    |
| 0.4967175   | 0.473901727 | 0.04025532  | 4.2662460   | 0.1842741   | 0           | 0.1777354   |
| 0.2111452   | 0.1846636   | 0.2023206   | 0.0572877   | 0.5725989   | 0.2574161   | 0           |
| 0.5535983   | 0.1411055   | 0.9475357   | 0.2937236   | 0.5059954   | 0.346466    |             |
| 1.2201290   | 0.4496737   | 0.5082482   | 0.06428456  | 0.6952360   | 0.1936064   | 0.5020772   |
| 0.1591615   | 0.4332941   | 0.2266904   | 0.06408533  | 0.2083732   | 0.1969791   |             |

0.1848951 0.7658067 0.09859366 0.08444463 0.3757245 0.2065279  
0.2282578 1.2334680.2994979 0.4751348 0.1746356 0.4010127  
1.4336820.4416819 1.1497790.5154401 0.056201046 0.2064538 0.03644377  
0.6128691 0.1127384 0.2510157 0.164025821 0.069267062 0.2803842  
0.229394308 0 0.4650433 0 0.0229097 0.1810190.3083505 0.421387  
0.3071611 0.1427541 0.1933828 0.03406534 0.25035619 0.2917935  
0.9323707 0.4286746 0.22967 0.7252037 0.6785885 0.2161045  
0.5425639 0.5969022 0.758408  
AC127024.4 0.4807301 0.0988212 0.4449114 0 0.253832696 0.6713862  
0.7859805 0.5279726 0.3398460.08353161 0.8223992 0.163809879  
0.3906250.551331081 0.176471307 0.6206654 0.4533332 1.29349 0.05338183  
1.3976210.408215005 0.4167484 1.5634371.2559271.3055021.2442562.291646  
2.3486881.8565610.466853122 0.6068391.418362726 0.3384580.3164524  
0.8105557 1.726684747 0.3271654 1.7335912.6045540.6633058 0  
0.8206777 1.0325382.2831070.9357244 0.7126310.6638414 0.07631426  
1.1312510.3530978 0.4036049 0.6518908 1.4585450.318969766 0.6826163  
1.1465731.86782 0.2478881.3937581.2474061.0200830.5617017 0.3135457  
1.2476040.07635209 0.790203427 0.3221997 1.1412090.7051775 1.011612719  
0.7390867 0.5096661.1225780.887991504 1.3824550.7448928 0.2928806  
0.6579538 1.48809 0.9157571 1.2480980.3570356 0.1528053 0.4490839  
0.18673426 0.5930329 0.2349603 1.6303560.1484491 1.0082581.255778  
0.83644704 0.3820561 0.3025574 1.7089191.996729006 1.6233260.08058088  
0.9025850.9256603 2.47128 0.7785795 1.2273161.3294330.4376296  
0.2515928 0.370571095 14.763550.322729877 0.4226014 1.8986230.5126399  
0.2961247 1.8769590.4657421 0.1512253 0 0.8008121 1.030178  
1.3144250.9043943 0.1461153 1.4128052.9260562.0901650.4430748  
0.2024626 0.7853276 0.400057524 1.0384161.2878390.3234822 0.5301187  
0 0.2536783 0.5864802 0.6138349 0.6061683 1.2294113.059368  
2.2147131.0488660.5067268 0.7646156 0.3629250.5331583 14.28972  
0.4912502 0.7156955 0.5060308 0.2960540.2903926 0.6249821  
0.429160624 0.2181801 1.2108360.488125119 0.4111424 0.8316582  
0.3662643 0.9672644 1.0662741.46661 0.460403136 0.3314628 0.8946974  
0.2527036 2.5599150.2133859 0.7843558 1.0423520.6075867 0.2183781  
0.354335307 0.48092 0.4147385 1.22751 0.2607227 1.7695440.6157768  
2.4191211.3119560.4891661 1.2270430.7456027 0.9606630.3509082  
0.4610859 0.2881871.3909360.3883567 2.9227710.667940131 1.322164  
1.7189320.6564422 1.0969370.9664377 0.5609887 0.242374473 0.7615724  
0.5996478 0.3847171 0.6181023 0.560462913 0.5824111 1.355833  
0.3777948 1.0058091.3356732.5560780.06881512 0.4043162 0.7447196  
0.6182139 1.5310051.3996651.9041250.226544361 0.747745216 2.429713  
0.333831042 0.430205805 0.6833439 0.247730723 0.4049498 1.1382161.96458  
1.010288067 3.9913511.9578661.4986391.001280642 0.4581571.06837 0.52083  
0.8285480.3907788 1.2675671.0879052.4874380.4344550.4744042 0.9494173  
1.192520662 0.7032591 0.268796142 1.4408790.7735964 0.5380578

1.2280650.5875625 2.8493951.4913490.06816779 1.8999270.6178221  
1.0448730.5928817 0.7038648 1.9559660.1718605 0.5451380.5462692  
2.1454780.3268633 3.4922430.5418401 0.6377426 0.2394050.138042  
1.223166394 1.2611560.8228603 0.6175476 0.5853728 2.5300320  
0.8867596 0.7857315 1.4685711.1691430.679710105 0.930343206 0.9570245  
0.7479254 0.3020647 1.5940660.4621714 0.1323237 0.6842707  
0.2098616 1.59167 1.2461462.1319381.0671331.24382 0.9370994 1.7225  
0.3003568 1.0341770.1283233 0.941292836 3.8597670.3536584 0.3289136  
0.4714122 0.2542324 0.9754271 1.3663720.2090889 0.2386713  
1.2847574.5651230.571820841 0.5868562 1.3430170.7887135 0.432599  
0.2780453 0.782341974 0.4329210.3477021 1.6046360.7789620.1003276  
0.4033947 0.507475744 0.5978949 3.43183 1.0866170.3810623 0.782872837  
1.0519660.2022539 0.4370049 1.240937874 1.050301268 0.3177460.1392259  
0.2110319 0.7334158 0.7533092 0.1290079 1.7458970.3817035  
0.3535681 0.4841366 1.3338710.9079609 0.462002896 0.1471672  
18.456130.5894678 1.0754820.7147502 1.6081541.9577930.2113293  
1.4660441.9188881.6468780.8148741 1.83112 0.3868948 0.8660107  
0.2478018 0.9793273 0.5428396 2.8778080.2739895 0.5912061  
1.3513320.6777798 0.9201334 0.9942378 0.05818698 1.3200460.5801214  
0.4685720.8161928 0.8401459 2.0278432.1256750.1802215 0.2058109  
0.7849087 1.6988264.5896120.4746702 0.1824863 1.3361680.5745964  
0.3665099 2.03829 2.3413441.6113080.3768737 1.027311328 0.3302088  
0.5995473 1.82045 0.1030385 0.4588372 0.599652837 0.759688756  
0.5125204 0.503177904 0.7949035 2.3956325.9732313.1826630.6145075  
0.3522754 0.7702627 0.2807333 0.5545047 0.1767443 0.5604191  
0.514835559 0.9778554 2.0007010.7835838 0.5247737 2.0394091.186476  
0.6419111.8418480.7014155 1.49295  
AL359220.1 0.3814532 0.05645762 0.2753646 0.039134988 0.138572144 0.43566  
0.2145409 0.1675758 0.02157308 0.05302501 0.2842276 0.317153752  
0.7655911 0.284358209 0.050409982 0.4580158 0.5995235 0.09970433  
0.2473696 0.7777745 0.213782837 0.7989338 0.4706152 0.4816716  
0.9033042 0.8214344 0.7208913 0.4250717 0.6302552 0.080438831  
0.30432 0.344066968 0.1933647 0.6307655 0.2881382 0.225859285  
0.5690466 0.2567754 0.5353686 0.1368444 0.1920366 0.120221  
0.8666437 0.5314074 0.4039120.7978178 0.02298544 0.1404862  
0.7337175 0.7770287 0.2775546 0.4707130.2614220.340164294 0.06259035  
0.7601810.4104252 0.4531876 0.5963825 0.3018893 0.6593116  
0.4412461 0.5025650.1583932 0.1696363 0.334408705 0.04090582  
1.0452460.8012746 0.096324212 0.5864559 0.2372559 0.2962920.174230815  
0.06227902 0.3572647 0.1115506 0.6473766 1.7260860.3255354  
0.2842886 0.6950371 0.1115491 0.1347622 0.302269348 0.182434  
0.06860919 0.1954874 0.1601977 0.01745542 0.7326232 0.398226023  
0.3533940.1536483 0.3818511 0.141662118 0.5758514 0.0613823  
0.5474872 0.2711999 0.1913867 0.4524145 0.3450245 0.5774125

|             |             |             |             |             |             |
|-------------|-------------|-------------|-------------|-------------|-------------|
| 0.3889239   | 0.6787612   | 0.144501342 | 5.3005830   | 0.090140876 | 0.1676644   |
| 0.4930473   | 0.5423643   | 0.4950059   | 0.3146714   | 0.5026021   | 0.3983845   |
| 0.1741675   | 0.7667573   | 0.2769655   | 0.4902003   | 0.2511689   | 0.4173862   |
| 0.9298756   | 0.01741341  | 0.3731667   | 0.6375212   | 0.3384392   | 0.7128806   |
| 0.272998858 | 0.2157303   | 0.7286473   | 0.2429895   | 0.5552480   | 0.070745602 |
| 0.3542713   | 0.4201577   | 0.4597943   | 0.08080578  | 0.1973997   | 0.4508344   |
| 0.3099320   | 0.2052913   | 0.4824975   | 0.3618214   | 0.3317487   | 0.7845734   |
| 0.8442981   | 0.0513480   | 0.3452803   | 0.2634030   | 0.2787659   | 0.1106029   |
| 0.09918307  |             |             |             |             |             |
| 0.435882843 | 0.3877958   | 1.0568610   | 0.042605315 | 0.5741758   | 0.04399401  |
| 0.3441013   | 0.4034920   | 0.1457852   | 0.2606770   | 0.371586703 | 0.7311721   |
| 0.113589    |             |             |             |             |             |
| 0.4277697   | 0.3250016   | 0.3115469   | 0.1701162   | 0.2222548   | 0.05999619  |
| 0.1559522   | 0.089971372 | 0.2808605   | 0.09477784  | 0.2235996   | 0.3392835   |
| 0.5221773   | 0.1837177   | 1.3133710   | 0.7217741   | 0.3027547   | 0.2153470   |
| 0.09860437  |             |             |             |             |             |
| 0.3088438   | 0.3831351   | 0.3707440   | 0.1097629   | 0.1530450   | 0.1331234   |
| 0.7103322   |             |             |             |             |             |
| 0.347681285 | 0.8491703   | 0.2766871   | 0.2812744   | 0.5067695   | 0.2689895   |
| 0.2172270   | 0.369256411 | 0.08350299  | 0.4758129   | 0.3083208   | 0.2681161   |
| 0.168993661 | 0.2587960   | 0.2582008   | 0.6331255   | 1.2386450   | 0.8640213   |
| 1.02865     |             |             |             |             |             |
| 0.5460392   | 0.2379899   | 1.5442850   | 0.1700555   | 0.4347823   | 0.3389437   |
| 0.2928819   | 0.12942724  | 0.07911017  | 0.6772959   | 0.500113577 | 0.182060165 |
| 0.4120907   | 0.199192112 | 0.4841258   | 0.5720014   | 0.2395736   | 0.064132054 |
| 0.7539209   | 0.3210652   | 0.5038475   | 0.369805216 | 0.3053751   | 0.4144495   |
| 0.1157161   | 0.2761257   | 0.3038764   | 0.2279809   | 0.3625602   | 0.3454063   |
| 0.1585779   | 0.1806882   | 0.6237742   | 0.280535267 | 0.3571373   | 0.311398003 |
| 0.4878160   | 0.3148632   | 0.1366214   | 0.3229619   | 0.4262613   | 1.0701870   |
| 0.6014285   |             |             |             |             |             |
| 0.1947250   | 0.7622261   | 0.349046567 | 0.3795405   | 1.0645480   | 0.4021255   |
| 0.5952507   |             |             |             |             |             |
| 0.3309223   | 0.3037533   | 0.7876544   | 0.2958670   | 0.4535127   | 0.8609589   |
| 0.1081      |             |             |             |             |             |
| 0.3688474   | 0.08358451  | 0.3066967   | 0.56939925  | 0.1779043   | 0.8966893   |
| 0.3057701   | 0.1229101   | 0.08289229  | 0.3644573   | 0.2987731   | 0.8711925   |
| 0.1128493   | 0.1880138   | 0.146700829 | 0.563728159 | 0.4395509   | 0.3560815   |
| 0.3259709   | 0.6775310   | 0.6258809   | 0.6383828   | 0.06629828  | 0.09325261  |
| 1.0279480   | 0.1142614   | 0.3735198   | 0.1447184   | 0.1926537   | 0.7053353   |
| 0.9282485   | 0.1048649   | 0.8993846   | 0.2036458   | 0.187223895 | 0.8068567   |
| 0.1661290   | 0.2326528   | 0.02992476  | 0.1075894   | 0.2034485   | 1.6232010   |
| 0.08627288  |             |             |             |             |             |
| 0.6135997   | 0.4675824   | 0.9273260   | 0.36958577  | 0.2235182   | 0.1705067   |
| 0.03004003  | 0.1176897   | 0.2029753   | 0.233704794 | 0.2583250   | 0.07567465  |
| 1.0899090   | 0.1538373   | 0.3311720   | 0.1216336   | 0.056374573 | 0.04174913  |
| 0.6353931   |             |             |             |             |             |
| 0.07303481  | 0.2751549   | 0.32468032  | 0.3004997   | 0.05777493  | 0.08322187  |
| 0.067520115 | 0.266688203 | 0.1277445   | 0.2238938   | 0.2500603   | 0.3398624   |
| 0.4638472   | 0.1801644   | 0.9589008   | 0.05249865  | 0.3029959   | 0.1690287   |
| 0.2765978   | 0.3073943   | 0.304272518 | 0.07473617  | 6.2291560   | 0.1336386   |
| 0.4063719   | 0.3464741   | 0.53492     | 0.4885440   | 0.05701362  | 0.5051991   |
| 0.4041845   |             |             |             |             |             |
| 0.3770984   | 0.3819868   | 0.07647211  | 0.5812459   | 0.2418833   | 0.209736    |
| 0.6838336   | 0.1493219   | 0.6165460   | 0.2882198   | 0.2090910   | 0.5930092   |
| 0.01075619  |             |             |             |             |             |
| 0.2336365   | 0.1407910   | 0.2327      | 0.2178675   | 0.4050807   | 0.2082113   |
| 0.480116    |             |             |             |             |             |

|             |             |             |             |             |             |
|-------------|-------------|-------------|-------------|-------------|-------------|
| 0.8761621   | 0.7240803   | 0.2040491   | 0.09533565  | 0.3200844   | 0.06850965  |
| 0.3594658   | 1.0329460   | 0.0715625   | 0.07529627  | 0.6615850   | 0.08105509  |
| 0.2911243   | 0.2460019   | 0.6982006   | 0.3867642   | 0.828200947 | 0.1467292   |
| 0.3805865   | 0.3555702   | 0.03924467  | 0.1941768   | 0.098969908 | 0.116541975 |
| 0.07436405  | 0.191647314 | 0.4036773   | 0.4611223   | 0.2275048   | 0.9995275   |
| 0.2190467   | 0.4025175   | 0.4551041   | 0.1900871   | 0.2608896   | 0.100976    |
| 0.8182211   | 0.15251243  | 0.2200779   | 0.7761262   | 0.0994822   | 0.05329935  |
| 0.3592504   | 0.1129744   | 0.1755292   | 0.5216371   | 0.3166232   | 0.9849408   |
| ACTA2-AS1   | 2.4002988   | 3.001121    | 1.1193372   | 0.077994483 | 0.201407432 |
|             | 3.659754    | 11.51468    |             |             |             |
| 10.086386   | 9.387093    | 0.02703     | 0.9107339   | 1.410730884 | 5.5799973   |
|             | 3.14308696  |             |             |             |             |
| 9.562604766 | 0.3228123   | 1.2501910   | 0.5989962   | 0.3977391   | 0.1217155   |
| 0.128376758 | 0.4113279   | 0.1220036   | 0.1367197   | 0.05053028  | 1.56519     |
| 0.1773992   | 0.1257230   | 1.1171620   | 0.24523356  | 3.8755340   | 0.254886421 |
|             | 0.2620046   |             |             |             |             |
| 0.2204728   | 0.9882516   | 0.096198166 | 1.1333510   | 0.4566510   | 0.4920532   |
|             | 2.920379    |             |             |             |             |
| 0.6547921   | 0.06108623  | 0.6216785   | 2.5238750   | 0.0362178   | 0.21314     |
|             | 0.2511043   |             |             |             |             |
| 0.08861373  | 0.04759323  | 0.2277812   | 0.1301815   | 0.07096455  | 0.7471839   |
| 0.111113313 | 0.3889771   | 0.07396471  | 0.03475727  | 0.05277064  | 0.199801    |
| 6.6387250   | 0.2422817   | 0.4891729   | 0.1213598   | 0.9094482   | 0.1034339   |
| 0.178414346 | 1.2315060   | 0.05784323  | 0.09553017  | 1.349452594 | 0.07866874  |
| 0.03287823  | 0.05145403  | 0.171851325 | 0.8371533   | 0.3684030   | 0.6872526   |
| 0.1114161   | 1.4268460   | 0.1417798   | 0.9874806   | 0.1266768   | 0.9167359   |
|             | 0.1185141   |             |             |             |             |
| 0.099380407 | 0.2074662   | 0.2319043   | 0.4732797   | 0.2944730   | 0.1463447   |
| 0.2546011   | 0.632328209 | 0.02640664  | 0.1129243   | 0.03968687  | 1.000154183 |
| 0.1478397   | 0.5380160   | 0.3493511   | 0.2618219   | 0.2104354   | 0.2607872   |
| 0.1017943   | 0.1151002   | 0.1323338   | 0.5903696   | 0.276618574 | 3.533051    |
| 0.712013285 | 0.5929431   | 0.1586662   | 1.109740    | 0.1814768   | 0.1164244   |
|             | 0.1442147   |             |             |             |             |
| 0.1097488   | 0.1137822   | 0.1420647   | 0.4866934   | 0.1589864   | 0.1203302   |
| 0.07069354  | 0.3453695   | 0.1681126   | 0.0926992   | 0.9003480   | 0.05224295  |
| 3.8451691   | 1.112946709 | 0.04567335  | 1.1811480   | 0.3077976   | 0.9938684   |
|             | 1.306073418 |             |             |             |             |
| 0.1227347   | 2.0024710   | 0.5702127   | 0.1583693   | 0.1819431   | 0.4229099   |
| 0.0730584   | 0.5920399   | 0.2629949   | 0.1008918   | 0.2317794   | 0.05159056  |
| 4.8927430   | 1.1154430   | 0.1523579   | 0.2056555   | 0.07639303  | 0.2669459   |
|             | 0.14363     |             |             |             |             |
| 0.107971042 | 0.1266720   | 0.54189     | 0.070849452 | 0.4774057   | 0.2280114   |
|             | 0.1134119   |             |             |             |             |
| 3.1755930   | 1.1190504   | 0.1561067   | 0.369132517 | 0.01603685  | 0.03148166  |
| 0.09781049  | 0.1095631   | 0.4817886   | 1.0688890   | 0.5224147   | 0.1633126   |
| 1.6640780   | 3.08582303  | 0.1675288   | 0.1525008   | 0.2065719   | 0.006307148 |
| 0.04165011  | 0.3217593   | 0.2956850   | 0.02539004  | 1.8755980   | 0.3841384   |
|             | 1.869824    |             |             |             |             |
| 6.5460180   | 0.3191799   | 0.02230827  | 4.1940770   | 0.1076741   | 0.03006317  |
|             | 0.2747387   |             |             |             |             |
| 0.116338677 | 1.7083480   | 0.2138539   | 0.4367001   | 0.7489055   | 0.9279708   |
| 0.3799848   | 0.205214956 | 0.08039219  | 0.7035453   | 0.1721739   | 0.229272    |
| 7.307851797 | 1.1915371   | 0.6093370   | 0.4752404   | 0.1167914   | 0.05539076  |
|             | 0.07933436  |             |             |             |             |
| 0.05327064  | 0.1564931   | 0.1201035   | 1.6749850   | 0.03898586  | 0.1203887   |
| 0.04251943  | 0.131528112 | 0.01929463  | 0.1328876   | 0.419937006 | 0.49954152  |
| 1.5274440   | 0.055933338 | 0.05224611  | 4.8369130   | 0.05502917  | 0.676170388 |
|             | 0.6782388   |             |             |             |             |

|                             |                           |                           |                          |                           |                       |
|-----------------------------|---------------------------|---------------------------|--------------------------|---------------------------|-----------------------|
| 0.1157756                   | 0.1503853                 | 0.440399905               | 0.8755794                | 0.3445993                 | 1.070949              |
| 0.2806078                   | 0.1228934                 | 0.3815930.2500165         | 0.06017365               | 0.2522378                 |                       |
| 0.005100586                 | 1.8006420.549814372       | 0.0567085                 | 0.31862012               | 4.2199382.738861          |                       |
| 0.1893260.5007944           | 0.0243664                 | 0.0746739                 | 1.6553091.7413950.102953 |                           |                       |
| 1.141854807                 | 0.7470620.2212829         | 0.2345970.07793356        | 0.9091021                | 0.1523882                 |                       |
| 0.6569646                   | 0.2076051                 | 0.7048664                 | 0.0707282                | 0.007490093               | 0.8570911             |
| 1.4478620.3472950.101450182 | 0.1355940.5971747         | 0.1971962                 | 0.3485726                |                           |                       |
| 0.1263567                   | 0.03703731                | 0.3432258                 | 0.09123669               | 0.2916889                 | 0.2639723             |
| 0.197314526                 | 0.032735922               | 0.7844237                 | 0.03618615               | 5.5608180.7980674         |                       |
| 0.4770301                   | 1.4340680.2962152         | 0.2436848                 | 0.5022276                | 0.3483484                 |                       |
| 0.6188850.01877457          | 0.4092141                 | 0.6995125                 | 0.0248241                | 0.8864442                 |                       |
| 0.2101495                   | 0.1179623                 | 0.255033284               | 0.3670473                | 0.06159855                | 2.205157              |
| 0.04561576                  | 0.1148026                 | 1.7798560.9443980.1315099 | 0.2598165                | 0.07459099                |                       |
| 0.1627463                   | 0.065392016               | 6.7221130.0649779         | 0.2594850.5800605        | 0.1479763                 |                       |
| 0.449762417                 | 0.6199897                 | 0.07209657                | 0.1707982                | 0.7537552                 | 0.08737295 0          |
| 0.847068372                 | 2.4009721.6603890.1917358 | 0.2120205                 | 0.040402109              | 0.1323302                 |                       |
| 0.1957091                   | 1.30242                   | 0.094347146               | 0.189711973              | 0.1673970.04939755        | 0.3539519             |
| 0.2129049                   | 0.1093399                 | 0.11235                   | 0.05141653               | 0.1846759                 | 1.5281670.1171176     |
| 0.0860472                   | 0                         | 0.206761899               | 0.1139239                | 1.7355841.4585760.4707837 |                       |
| 0.8299455                   | 2.0602960.1045209         | 0.0357859                 | 0.1519933                | 0.1097196                 |                       |
| 0.2674948                   | 0.06065425                | 0.3217335                 | 0.04991668               | 0.2178767                 | 0.06793853            |
| 0.6054346                   | 0.03501824                | 0.09746393                | 0.03787476               | 0.8335951                 | 0.3126879             |
| 0.07378282                  | 0.1095826                 | 0.1554105                 | 0.3828678                | 0.06812429                | 0.06415417            |
| 0.1926989                   | 0.1000390.3658317         | 0.06540744                | 0.2207394                | 0.06975587                |                       |
| 0.2688539                   | 15.674380.4840234         | 0.08074718                | 0.2353965                | 0.4326237                 |                       |
| 0.06464653                  | 0.4756913                 | 0.3090521                 | 0.1901892                | 0.1484345                 | 0.3931812             |
| 1.1912830.228635672         | 0.2967003                 | 0.5027934                 | 0.0813019                | 0.3290240.8633129         |                       |
| 0.400371414                 | 2.058295894               | 0.8076665                 | 0.056804459              | 0.05982518                | 0.1346                |
| 0.3467964                   | 0.4133246                 | 0.4574019                 | 0.2249781                | 1.1122731.1590360.1009998 |                       |
| 1.5335240.06627918          | 0.254623179               | 0.6795527                 | 0.1577449                | 0.2274682                 |                       |
| 0.7515326                   | 0.7054958                 | 0.4122660.04777993        | 0.09596716               | 1.9004110.6500875         |                       |
| AC138956.2                  | 0.02804259                | 0.0576457                 | 0.1622073                | 0                         | 0.207296701 0.3046104 |
| 0.3209420.3079840.04956087  | 0.02436339                | 0.3198219                 | 0.286667288              | 0.9969074                 |                       |
| 0.160804899                 | 0.051470798               | 1.0861640.4407406         | 0.1077909                | 0.0311394                 |                       |
| 1.0870380.178594065         | 0.5834478                 | 0.8237463                 | 0.1221040.7234658        | 0.6532342                 |                       |
| 0.4158913                   | 1.6032710.3766935         | 0.038904427               | 0.2831915                | 0.561435246               |                       |
| 0.03290564                  | 0.7753083                 | 0.2364121                 | 0.06104441               | 0.4580316                 | 0.280906              |
| 1.0128820.09673209          | 0.09287893                | 0.4419034                 | 0.6692379                | 0.6860852                 |                       |
| 0.6004231                   | 0.8314029                 | 0.3168334                 | 0.13355                  | 0.3156026                 | 0.1373158             |
| 0.2354362                   | 0.2376685                 | 0.2502406                 | 0.260491975              | 0.1769746                 | 0.966094              |
| 0.8800304                   | 0.1156811                 | 0.6022411                 | 0.2273917                | 0.2704765                 | 0.4095742             |
| 0.1371763                   | 0.1940717                 | 0.1781549                 | 0.153650666              | 0.04698746                | 2.1239161.15179       |
| 0.29505371                  | 0.9484946                 | 0.2973052                 | 0.2412558                | 0.65926642                | 0.9365015 0           |
| 0.3844057                   | 0.8155885                 | 0.4340261                 | 0.1602575                | 0.2997882                 | 0.2082707             |

|                   |                     |                           |                     |                     |                   |            |
|-------------------|---------------------|---------------------------|---------------------|---------------------|-------------------|------------|
| 0.1337046         | 0.3095957           | 0                         | 0.2128836           | 0.3015324           | 0.4579087         | 0.04329765 |
| 0.2673412         | 0.1395308           | 0.24396372                | 0.1910281           | 0.2017049           | 0.9569947         |            |
| 0.68515211        | 0.5570237           | 0                         | 0.2925044           | 0                   | 0.3171476         | 0.3493626  |
| 0.2556908         | 1.7142690.06382098  | 0.2935249                 | 0.524975718         | 9.0750870.150607276 |                   |            |
| 0                 | 1.2585570.19936     | 0.0575798                 | 0.8141509           | 0                   | 0.08821476        | 0.09145677 |
| 0.4282121         | 0.2474447           | 0.5750609                 | 0                   | 0.7671053           | 0.5205072         | 1.1468     |
| 1.2700650.2584603 | 0                   | 0.3664862                 | 0.175025167         | 0.05506752          | 0.6205889         | 0          |
| 0.07730898        | 0.144468713         | 0.3329528                 | 0.3909868           | 0.1432282           | 0.2475187         | 0          |
| 0.1912105         | 0.2348938           | 0.4078924                 | 0.1343594           | 0.08109559          | 0.04234124        |            |
| 0.08482064        | 4.1037150.08187503  | 0.1669956                 | 0.1771108           | 0.3741794           |                   |            |
| 0.08469784        | 0.4557161           | 0.350481176               | 0.3818152           | 0.5297408           | 0.071184913       |            |
| 0.3597496         | 0.2425670.04273084  | 0.6045402                 | 0.3349194           | 0.5133136           |                   |            |
| 0.19183464        | 0.1933533           | 0.3795686                 | 0.1474104           | 1.2348310.2489502   |                   |            |
| 0.4194125         | 0.5768574           | 0                         | 0.1910809           | 0.516738989         | 0.4488587         | 0.09677232 |
| 0.2801924         | 0.3041765           | 1.4228090.1077609         | 0.7055770.8673487   | 0.2140102           |                   |            |
| 0.1684177         | 0.1449783           | 0.7773106                 | 0.08187859          | 0.2241390.2689746   |                   |            |
| 0.1622759         | 0                   | 1.4613860.155852697       | 0.5444205           | 0.2864887           | 0                 | 0.6043311  |
| 0.5203895         | 1.3089740.247423941 | 0.4442506                 | 0.04372432          | 0.2244183           |                   |            |
| 0.7211193         | 0                   | 0.3882741                 | 0.1581806           | 0.6170648           | 0.6453939         | 0.9275505  |
| 1.15345           | 0.2007108           | 0.5145842                 | 0.6757641           | 0.3005207           | 1.5981540.8164713 |            |
| 0.4699283         | 0.528603509         | 0.203552864               | 1.0475940.506310413 | 0.167302258         |                   |            |
| 0.1195852         | 0.144509589         | 0.3543311.0512690.4222124 | 0.392889804         | 1.306113            |                   |            |
| 0.2537974         | 0.32378             | 0.318589295               | 0.5345165           | 0.6232156           | 0.6456122         |            |
| 0.6524815         | 0.4559086           | 0.6161782                 | 0.3173056           | 0.7557320.06335802  |                   |            |
| 0.5227231         | 0.7753575           | 0.040919827               | 0.06837241          | 0.235196624         | 0.67241           |            |
| 0.5308995         | 0.1141335           | 0                         | 0.3427448           | 0.8657016           | 0.1023475         | 0.03976454 |
| 0.4433162         | 0.57663396          | 0.2708930.6916953         | 0.7755547           | 0.6040483           | 0                 |            |
| 0.1413321         | 0.1820897           | 0.3884055                 | 0.4085791           | 3.3162780.4063801   |                   |            |
| 0.2480110         | 0.08052447          | 1.325096927               | 0.2179777           | 0.3200012           | 0.2881889         |            |
| 0.4990678         | 0.7141218           | 0                         | 0.03979049          | 0.4277872           | 0.58614           | 0.2728     |
| 0.594746342       | 0.049336382         | 0.7552987                 | 0.2181449           | 0.0440511           | 1.091589          |            |
| 0.4043999         | 0.1543777           | 0.3151247                 | 0.08161286          | 0.4036844           | 0.08076871        |            |
| 0.8456688         | 0.6507896           | 0.8416516                 | 1.2494660.6841136   | 0.08760407          |                   |            |
| 1.2970310.3368487 | 0.695510817         | 1.2810430.6189021         | 0.7126461           | 0                   | 0                 | 0          |
| 0.7970504         | 0.06098426          | 0.6613184                 | 0.7994045           | 0.8129123           | 0.151619162       |            |
| 0.1711664         | 0.2611422           | 0.7361326                 | 0.2523494           | 0.08109654          | 0.483211219       |            |
| 0.5555820.1448759 | 0.4368177           | 0.1514648                 | 0.3511466           | 0.1176568           |                   |            |
| 0.370034397       | 0.2092632           | 1.2928940.1491435         | 0.4445727           | 0.63934615          | 0                 |            |
| 0.1769722         | 0.0509839           | 0.620468937               | 0.653520789         | 0.3501090.6226489   | 0                 |            |
| 0.3422607         | 0.4833734           | 0.07525464                | 0.6641998           | 0.1855503           | 0.2062481         |            |
| 0.04706884        | 0.1556183           | 0.9533589                 | 0.370564823         | 0.1287713           | 7.051023          |            |
| 0.04912231        | 0.5676153           | 0.3032273                 | 1.0131370.9057608   | 0                   | 0.8551925         |            |
| 0.8140736         | 0.3087896           | 0                         | 1.0681530.2256886   | 0.1515519           | 0.3131939         |            |
| 0.1904247         | 0                   | 2.8957940.8219684         | 0.2956031           | 0.4455480.04942145  |                   |            |



0.04128804 0.3122926 0.1697120.5646865 0.04834345 0.4100005  
1.3648560.7701338 0.6900299 1.2399770.1051292 0.3901832 0.4578634  
1.5415271.5820250.06922274 0.1064503 0.5456020.4096659 0.09162749  
1.2314670 1.6755270.1099215 0.239705977 0.3852436 0.07771909  
0.7351817 0 0.2676550.384777237 0.258505202 0.1281301 0.48920074  
0.1545646 0.2704745 2.0906311.6855550.3033146 0.4931856 0.5875722  
0 0.1522170.3093026 0.9807333 0.400427657 0 1.4264260.1371272 0  
0.9814656 0.4089748 0.6624851 1.0330880.04546212 0.7775781  
AC024075.3 0.6944882 2.1699881.2212112.196894784 0.498712193 1.336334  
1.8621692.4407591.5219741.0860680.6864470.804604622 2.5394290.915954358  
1.631614633 0.6276523 2.4013331.9754240.4318620.8883937 0.294864497  
1.9265820.49544 1.2700651.4333580.9347091 0.6179848 2.3967850.5597397  
0.308315758 0.7013374 1.63923347 0.5215513 0.8411815 0.7962608  
0.483774088 0.9830921 0.6121959 1.4334010.4791233 0.04600382  
0.3283184 2.0551761.27934 0.5407188 1.2354050.7323428 0.1322971  
0.4547520.2720554 0.5830689 0.5415096 0.2478931 1.253377631  
0.3506288 3.5704631.2453930.4870326 0.6860803 0.4955691.446872  
0.5680248 0.9965225 0.1922511 0.7059345 0.558100732 0.4189201  
2.6692445.5419270.167020486 0.7687611 0.09817206 1.2632460.373189675  
1.0050260.1913087 0.4231108 1.7109271.2898640.6879346 1.272754  
0.6877233 0.08830026 0.4482414 0.215812953 1.0017110.3530136  
0.6280797 0.3860233 1.19175 0.4492213 0.302093912 0.6307869  
0.4995319 1.3825250.88234223 1.8761150 0.4056646 0.7406351  
0.1428057 0.5883450.2532922 0.92996 1.5173351.4538570.367094818  
7.8891440.372986124 0.3663074 0.9475306 0.7570443 0.5703965  
0.5284054 0.3767880.5680170.3170959 1.0412060.4552293 1.424166  
0.2613072 0.5910405 1.2031242.1135671.2581511.79225 0.4289827  
0.6807154 0.346766559 0.3273056 1.4560280.7477112 0.8041294  
0.787124096 1.1360790.3389041 0.6384805 0.7005622 0.2507396  
0.2525557 0.4072080.3030495 1.0115520.4820091 0.08388809 0.9522828  
4.7639281.8249070.2067863 0.9942129 0.7698515 0.0839033 0.8577382  
1.041580082 0.8825448 1.7055070.493619961 0.5147636 0.4004858  
0.8042697 1.7966070.2843808 0.7627473 1.026189354 1.3886610.3760079  
0.1460276 0.5973997 0.7398444 1.1331220.7104463 0.2340672  
1.0095380.358324072 0.3890670.1917290.6476493 1.1299621.3818250.3914168  
1.1404051.0108380.7773427 0.5005134 0.8976143 0.8058336 0.0811105  
0.5328873 0.9658862 0.4822608 0.04488325 1.4476770.308781329  
1.3482830.7804532 0.5689987 1.3381860.7303027 0.7131819 0.245102891  
0.5601058 0.7363405 0.8614632 1.7858870.323869751 0.6731055  
0.7312513 0.4366258 1.1624350.7718334 1.3934510.9146084 1.125713  
0.5737927 0.8931045 1.3037810.3594720.9733598 0.720011534 0.48970531  
0.8546311 0.462979186 0.290032432 0.3553901 0.429461892 0.4680095  
2.0280041.6431320 1.1813510.4085519 1.1225990.157800326 0.7280656  
0.4801761 0.7147976 1.0772681.1290790.7731707 0.3143291.766797

|             |             |             |             |             |             |             |            |          |           |
|-------------|-------------|-------------|-------------|-------------|-------------|-------------|------------|----------|-----------|
| 0.1255273   | 0.3045997   | 1.1246940   | 0.72964734  | 0.7450412   | 0.232990277 |             |            |          |           |
| 1.1379250   | 0.6836949   | 0.2826570   | 0.6082724   | 0.4850422   | 3.7390510   | 0.811099    |            |          |           |
| 0.9453964   | 0.9222307   | 1.142449272 | 1.3753030   | 0.7830932   | 1.8755051   | 1.196764    |            |          |           |
| 1.0262190   | 0.3500157   | 0.8117171   | 0.9832803   | 0.8364757   | 2.8627890   | 0.8051358   |            |          |           |
| 0.2866319   | 0.06917142  | 0.3988454   | 1.480956935 | 0.7557649   | 0.7132485   |             |            |          |           |
| 0.4995995   | 0.2602032   | 1.4148450   | 0.9289626   | 0.3153378   | 0.72647     | 0.3573179   |            |          |           |
| 0.6756022   | 0.70700053  | 0.439862079 | 1.8217370   | 0.2160985   | 0.4363786   |             |            |          |           |
| 1.8422980   | 0.5341418   | 0.7646473   | 0.2913573   | 0.4850836   | 0.7997951   |             |            |          |           |
| 1.2001650   | 0.8377357   | 0.4484763   | 0.5175039   | 2.2434132   | 3.931140    | 0.3905202   |            |          |           |
| 1.1354610   | 0.4819949   | 0.435149258 | 1.9996780   | 0.3678578   | 1.3304650   | 0.227009    |            |          |           |
| 0.0979407   | 1.3688922   | 0.5379150   | 0.3020609   | 0.9654321   | 0.5939290   | 0.8608235   |            |          |           |
| 0.570748006 | 0.7630232   | 1.2934630   | 0.9571104   | 0.03571174  | 0.6025184   |             |            |          |           |
| 0.638237708 | 0.8505721   | 0.3157373   | 0.8017540   | 0.5001465   | 0.4058279   | 0.5244887   |            |          |           |
| 0.329906839 | 1.3820010   | 0.4957803   | 0.7017858   | 0.7982290   | 0.422232354 | 0.1823671   |            |          |           |
| 0.4090614   | 0.6060675   | 0.102441401 | 0.3236951   | 0.4080290   | 0.6972612   |             |            |          |           |
| 0.1219471   | 0.3814313   | 0.4788389   | 0.4472921   | 1.62299     | 0.3308574   |             |            |          |           |
| 0.6129398   | 0.3263910   | 0.4367824   | 1.5390480   | 0.23360184  | 0.08504219  | 6.384028    |            |          |           |
| 0.3406305   | 1.1245810   | 0.7509571   | 0.0779760   | 0.7022066   | 0.1831785   | 0.9076822   |            |          |           |
| 1.4112650   | 0.9176788   | 0.8331026   | 2.7288690   | 0.9688098   | 2.1018230   | 0.4534509   |            |          |           |
| 0.7231139   | 0.1045622   | 0.0787170   | 0.4523653   | 1.8057850   | 0.5092712   | 0.1468735   |            |          |           |
| 0.3272058   | 0.4861420   | 0.5379839   | 0.5085357   | 0.04788995  | 0.4738467   |             |            |          |           |
| 1.4778241   | 0.4911410   | 0.6347313   | 0.2097175   | 0.1041430   | 0.5054531   | 0.9638325   |            |          |           |
| 0.7089952   | 1.5671850   | 0.3085802   | 0.05272586  | 2.3935710   | 0.4058229   | 0.7866555   |            |          |           |
| 1.4302452   | 1.1460941   | 0.2549770   | 0.3992646   | 0.118728664 | 1.1448890   | 0.5389301   |            |          |           |
| 0.4046028   | 0.2381678   | 1.6203260   | 0.762335389 | 0.585326171 | 0.1692375   |             |            |          |           |
| 0.6299951   | 0.8166113   | 0.6251869   | 0           | 0.8953694   | 0.5463078   | 0.5292723   |            |          |           |
| 0.7190156   | 0.3244498   | 1.1120690   | 0.2723565   | 1.6552050   | 0.561951008 | 0.9760208   |            |          |           |
| 1.2845860   | 0.1358408   | 0.1212985   | 2.9462380   | 0.4363027   | 0.5421364   | 1.964922    |            |          |           |
| 0.4503564   | 1.324888    |             |             |             |             |             |            |          |           |
| AL354726.1  | 0           | 0           | 0.1278290   | 0           | 0.05715505  | 0           | 0.05778805 | 0        | 0         |
| 0.07001077  | 0           | 0.0374106   | 0.052801609 | 0.067603436 | 0           | 0           | 0          | 0        | 0         |
| 0.1070814   | 0           | 0           | 0.04009385  | 0.1500353   | 0           | 0.07803504  | 0.4977319  |          |           |
| 0.2473808   | 0.102196703 | 0           | 0.349298283 | 0           | 0.3879297   | 0.06210228  |            |          |           |
| 0.080177733 | 0.05013281  | 0.07379023  | 0.1900504   | 0.1270511   | 0           | 0.09673507  |            |          |           |
| 0.1757998   | 0           | 0           | 0.1985440   | 0.04623771  | 0           | 0.1130517   | 0.09017755 | 0        |           |
| 0.03121616  | 0           | 0           | 0.04880383  | 0.05504099  | 0.1139545   | 0           | 0.05973276 |          |           |
| 0           | 0.05379482  | 0.1201145   | 0           | 0.05849862  | 0           | 0           | 0.3330891  | 0.108057 |           |
| 0.05536189  | 0.05662655  | 0           | 0.1810704   | 0           | 0.2733404   | 0.06341266  |            |          |           |
| 0.1121980   | 0.2520519   | 0.3109441   | 0.07016248  | 0.1125005   | 0           | 0           | 0          | 0        | 0         |
| 0.1398042   | 0.07200774  | 0.2775842   | 0           | 0.1755674   | 0.0916322   | 0.040053745 |            |          |           |
| 0.04181709  | 0.0993472   | 0.3142371   | 0           | 0           | 0           | 0           | 0          | 0        | 0.1343331 |
| 0           | 0           | 0.04819066  | 0.202800102 | 7.2976640   | 0.049453135 | 0           | 0.06612121 | 0        |           |
| 0.0756272   | 0.3318618   | 0           | 0           | 0           | 0.1533894   | 0.09285771  | 0.06294199 | 0        |           |
| 0           | 0           | 0.1751448   | 0.1000887   | 0.05657837  | 0           | 0.06016937  | 0          | 0        | 0         |

|             |             |             |             |             |             |             |            |             |           |            |   |            |
|-------------|-------------|-------------|-------------|-------------|-------------|-------------|------------|-------------|-----------|------------|---|------------|
| 0           | 0           | 0.1457704   | 0           | 0           | 0           | 0           | 0          | 0           | 0         | 0          | 0 | 0.05561238 |
| 0.0371354   | 6.6532250   | 0.05376867  | 0           | 0.07754104  | 0           | 0.05562246  | 0          |             |           |            |   |            |
| 0.131523853 | 0.2507443   | 0.05798158  | 0           | 0           | 0.1061985   | 0.05612409  |            |             |           |            |   |            |
| 0.1588046   | 0.1256840   | 0.100784766 | 0.06348915  | 0           | 0           | 0.1885892   |            |             |           |            |   |            |
| 0.05449656  | 0.1502373   | 0.02047739  | 0.0517238   | 0           | 0.135740391 | 0           | 0          |             |           |            |   |            |
| 0.04089044  | 0           | 0.03664243  | 0.04717892  | 0.2438758   | 0.1340240   | 0           |            |             |           |            |   |            |
| 0.09520964  | 0           | 0           | 0.0588783   | 0           | 0           | 0.05950938  | 0.3199053  | 0.153526538 |           |            |   |            |
| 0.1191766   | 0.2351773   | 0           | 0           | 0.1708742   | 0.08596245  | 0.046424961 |            |             |           |            |   |            |
| 0.1060897   | 0.1148579   | 0.0736896   | 0.07892848  | 0           | 0.09561974  | 0.1385064   |            |             |           |            |   |            |
| 0.05789094  | 0.2311859   | 0.1949240   | 0.1108522   | 0.05272402  | 0.02816133  |             |            |             |           |            |   |            |
| 0.06339791  | 0           | 0.06173731  | 0.03971779  | 0           | 0.173571302 | 0.19096644  |            |             |           |            |   |            |
| 0.3237515   | 0.102308419 | 0           | 0.0523557   | 0.126535759 | 0           | 0.07267218  |            |             |           |            |   |            |
| 0.1584422   | 0           | 0.07458658  | 0.08333646  | 0.04252632  | 0.278963761 | 0.1755129   |            |             |           |            |   |            |
| 0.0909502   | 0.09976097  | 0.3174039   | 0.1497013   | 0           | 0           | 0.1588165   | 0          | 0           |           |            |   |            |
| 0.1454829   | 0           | 0.08980257  | 0           | 0           | 0.1045951   | 0           | 0          | 0.06431032  |           |            |   |            |
| 0.09096327  | 0           | 0           | 0           | 0.047335624 | 0           | 0.06489252  | 0.1497999  | 0.1322295   |           |            |   |            |
| 0           | 0           | 0           | 0.2267309   | 0.03577608  | 0.9333660   | 0.05930588  | 0.1085819  | 0           |           |            |   |            |
| 0.05288174  | 0.044626303 | 0.07157475  | 0           | 0           | 0.1034987   | 0.06253007  |            |             |           |            |   |            |
| 0.1759549   | 0.05226214  | 0.1204007   | 0.2368786   | 0           | 0.052077292 | 0.129600049 |            |             |           |            |   |            |
| 0.04313192  | 0.1910124   | 0           | 0.5310106   | 0.05901691  | 0           | 0           | 0          | 1.0604250   |           |            |   |            |
| 0.1960110   | 0.03716385  | 0.1524763   | 0           | 0.08423786  | 0.1725931   | 0.1980887   |            |             |           |            |   |            |
| 0.1474761   | 0.096158605 | 0           | 0.05419242  | 0.03600049  | 0           | 0           | 0          | 0.5982127   |           |            |   |            |
| 0           | 0.1371469   | 0           | 0.2577221   | 0           | 0.05620389  | 0           | 0.06042879 | 0.2367457   |           |            |   |            |
| 0           | 0.176295967 | 0.06633815  | 0.03805695  | 0.6147114   | 0.06631296  | 0           | 0          |             |           |            |   |            |
| 0.097203065 | 0.04580887  | 0.1095568   | 0           | 0.03649477  | 0.079975069 | 0           |            |             |           |            |   |            |
| 0.07748037  | 0           | 0.203736069 | 0.053647229 | 0.2163975   | 0.1066706   | 0           | 0          |             |           |            |   |            |
| 0.1154324   | 0.09884191  | 0.05815879  | 0           | 0.04514883  | 0.3091088   | 0.0340657   |            |             |           |            |   |            |
| 0.04637677  | 0           | 0           | 7.8669090   | 0           | 0.04978359  | 0.04928472  | 0.1551725  | 0           |           |            |   |            |
| 0.08023128  | 0.1336539   | 0.09012766  | 0           | 0.1476787   | 0.09880896  | 0           | 0          |             |           |            |   |            |
| 0.3334802   | 0           | 0.7165885   | 0.0299889   | 0           | 0.1800607   | 0           | 0          | 0.3515789   |           |            |   |            |
| 0.04458107  | 0.06742526  | 0.06349588  | 0.08975135  | 0.04168945  | 0.04597813  |             |            |             |           |            |   |            |
| 0.4531539   | 0.5958391   | 0.04602672  | 0           | 0.0751716   | 0.1446209   | 0.1065582   |            |             |           |            |   |            |
| 0.04545971  | 0           | 0           | 0           | 0.1115482   | 0.06185744  | 0.1610262   | 0.04812484 |             |           |            |   |            |
| 0           | 0.1084268   | 0.2551970   | 0           | 0           | 0           | 0.048504174 | 0.05609676 | 0.128506463 |           |            |   |            |
| 0.06767006  | 0.05920836  | 0           | 0.06416994  | 0.07243334  | 0.05398051  | 0.04539627  |            |             |           |            |   |            |
| 0           | 0           | 0.04513869  | 0           | 0           | 0           | 0.2270927   | 0          | 0           | 0.1171899 | 0.08264013 |   |            |
| 0.2648221   | 0.2171027   | 0.05971143  | 0.285963    |             |             |             |            |             |           |            |   |            |
| AC067852.3  | 0.09381991  | 0.1577951   | 0.06906891  | 0.182299309 | 0.162125399 |             |            |             |           |            |   |            |
| 0.3705859   | 0.3625652   | 0.2141087   | 0.1507381   | 0.1259711   | 0.2756069   |             |            |             |           |            |   |            |
| 0.174378258 | 0.5804246   | 0.097816805 | 0.17220184  | 0.5230608   | 0.2278852   |             |            |             |           |            |   |            |
| 0.0819608   | 0.04735485  | 0.1405135   | 0.090531553 | 0.1478785   | 0.3937063   |             |            |             |           |            |   |            |
| 0.1764037   | 0.2316214   | 0.3200948   | 0.1264923   | 0.4698988   | 0.1002491   |             |            |             |           |            |   |            |
| 0.035498048 | 0.2368630   | 0.368480178 | 0.02001633  | 0.1122896   | 0.2300932   |             |            |             |           |            |   |            |
| 0.111399016 | 0.3250546   | 0.05126211  | 0.3740796   | 0.2647874   | 0           | 0.01120032  |            |             |           |            |   |            |

|             |             |             |             |             |             |
|-------------|-------------|-------------|-------------|-------------|-------------|
| 0.1017735   | 0.2700449   | 0.2158203   | 0.2298810   | 0.05353559  | 0.08123776  |
| 0.07853705  | 0.3341141   | 0.01193455  | 0.05782902  | 0.09133205  | 0.16977423  |
| 0.05382637  | 0.2486297   | 0.1784393   | 0.02638808  | 0.1373776   | 0.2351461   |
| 0.3619649   | 0.2491419   | 0.08344362  | 0.1918359   | 0.05418535  | 0.311549738 |
| 0.04287335  | 0.2988880   | 0.5004485   | 0.102559815 | 0.1966924   | 0.06028308  |
| 0.1362722   | 0.128901993 | 0.3639553   | 0.0440528   | 0.1818694   | 0.1459172   |
| 0.3360202   | 0           | 0.1563083   | 0.12669     | 0.09488717  | 0.1231359   |
| 0.1083849   | 0.2571171   | 0           | 0.04878669  | 0.05304744  | 0.157677012 |
| 0.01533701  | 0.1940450   | 0.145871094 | 0.3388347   | 0           | 0.2846863   |
| 0.03187732  | 0.06221416  | 0.1862109   | 0.03882198  | 0.1450716   | 0.112708259 |
| 2.5911750   | 0.114517053 | 0.1874442   | 0.5052788   | 0.06063483  | 0.08756375  |
| 0.1536964   | 0.0495790   | 0.02683029  | 0.05563269  | 0.08287975  | 0.1290166   |
| 0.1166022   | 0.08022853  | 0.1425802   | 0.3034293   | 0.2514579   | 0.1776921   |
| 0.1179151   | 0           | 0.1253991   | 0.159700382 | 0.03349729  | 0.1986848   |
| 0.10581     | 0.043939793 | 0.2587928   | 0.1932412   | 0.08712496  | 0.08603679  |
| 0.1667986   | 0.0387708   | 0.05358177  | 0.01550743  | 0.09807615  | 0.02466502  |
| 0.1931697   | 0.04299664  | 3.80291     | 0.03735312  | 0.01269782  | 0.0538678   |
| 0.02626286  | 0           | 0.1663259   | 0.045684841 | 0.01935469  | 0.1342661   |
| 0.09725949  | 0.09836817  | 0.0519859   | 0.2451592   | 0.2473862   | 0.2341845   |
| 0.081684427 | 0.05880792  | 0.1154448   | 0.05977934  | 0.3231655   | 0.06309797  |
| 0.4406730   | 0.1991591   | 0.02395503  | 0.2615254   | 0.125731883 | 0.2047788   |
| 0.05681321  | 0.1040788   | 0.1357627   | 0.06555043  | 0.4404936   | 0.1241421   |
| 0.1518782   | 0.1920893   | 0.1433081   | 0.4563399   | 0.02490317  | 0.05453704  |
| 0.1636159   | 0.0493558   | 0.0137804   | 0.3555814   | 0.035551652 | 0.4553563   |
| 0.2614044   | 0.08734916  | 0.1729937   | 0.07913758  | 0.1194363   | 0.021500961 |
| 0.1719680   | 0.01329864  | 0.05972423  | 0.03655444  | 0.049718484 | 0.1254734   |
| 0.09622044  | 0.09383934  | 0.2230624   | 0.06770691  | 0.2994797   | 0.0732548   |
| 0.05216983  | 0.1468085   | 0.09140259  | 0.3145189   | 0.1747491   | 0           |
| 0.035377193 | 0.2623954   | 0.118456176 | 0.012721139 | 0.06061922  | 0.073253709 |
| 0.1197432   | 0.2355985   | 0.1375873   | 0.119496438 | 0.1381742   | 0.0482449   |
| 0.1772583   | 0.080748439 | 0.02032148  | 0.0421221   | 0.1039560   | 0.1911006   |
| 0.05199879  | 0.1999030   | 0.1688885   | 0.1930773   | 0.09635091  | 0.07481643  |
| 0.3705790   | 0.074673969 | 0           | 0.059612048 | 0.3749383   | 0.2099132   |
| 0.04668911  | 0.2829506   | 0.1158524   | 0.1089505   | 0.02418857  | 0.6337174   |
| 0.109613598 | 0.1441850   | 0.1502695   | 0.1248792   | 0.2653730   | 0.05081896  |
| 0.2492196   | 0.2100134   | 0.2568212   | 0.2737730   | 0.06866638  | 0.1508638   |
| 0.124007653 | 0.2983381   | 0.04866378  | 0.02191298  | 0.1517902   | 0.2027185   |
| 0.04074531  | 0.02420435  | 0.05576159  | 0.1234198   | 0.05531428  | 0.156771847 |
| 0.105038749 | 0.1598067   | 0.02211607  | 0.1071842   | 0.4795613   | 0.06833179  |
| 0.03521518  | 0.0511170   | 0.01241117  | 0.4174506   | 0.1965248   | 0.2118184   |
| 0.1032710   | 0.1677151   | 0.7837951   | 0.4876674   | 0           | 0.2201797   |
| 0.18927071  | 0.3896261   | 0.1003933   | 0.1333843   | 0.01393961  | 0.01503525  |
| 0.02472281  | 0.4328944   | 0.1112893   | 0.3387593   | 0.04558816  | 0.5285932   |
| 0.064560417 | 0.05205983  | 0.2779901   | 0.1539263   | 0.08771592  | 0.08632857  |

|             |             |             |             |             |             |
|-------------|-------------|-------------|-------------|-------------|-------------|
| 0.269440357 | 0.06912771  | 0.07931454  | 0.1328570   | 0.07677941  | 0.1068003   |
| 0.1073550   | 0.157563034 | 0.2651953   | 0.4059154   | 0.04536161  | 0.1352157   |
| 0.129637007 | 0.07465564  | 0.05382565  | 0.04651987  | 0.267344911 | 0.21118961  |
| 0.03131905  | 0.4775596   | 0.0624019   | 0.1040977   | 0.1069213   | 0.04577701  |
| 0.3501588   | 0.03386079  | 0.06272982  | 0.1861063   | 0.1104388   | 0.4080942   |
| 0.112706352 | 0.01305515  | 4.5427580   | 0.1045830   | 0.3089325   | 0.1037541   |
| 0.1317536   | 0           | 0.1486312   | 0.1547490   | 0.06261173  | 0.06672666  |
| 0.02288088  | 0.07682353  | 0.05861977  | 0.05791721  | 0.03210342  | 0.3318762   |
| 0.1944441   | 0.1798138   | 0.04169609  | 0.07515704  | 0.01255765  | 0.04070701  |
| 0.1548524   | 0.2342018   | 0.02940708  | 0.1247006   | 0.1737701   | 0.2768223   |
| 0.08994464  | 0.1563734   | 0.1065826   | 0.06390097  | 0.4874030   | 0.3181493   |
| 0.01052696  | 0.0161883   | 0.3555931   | 0.07929018  | 0.1300519   | 0.2453932   |
| 0.2005378   | 0.07457666  | 0.18945     | 0.018226491 | 0.1004322   | 0.0354571   |
| 0.1366467   | 0           | 0.03618071  | 0.191502035 | 0.146015446 | 0.0259803   |
| 0.06268056  | 0.02742138  | 2.1195340   | 0.6389641   | 0.07547921  | 0.2125016   |
| 0.2417822   | 0.04980752  | 0.02893525  | 0.08362098  | 0.2209538   | 0.111639969 |
| 0.1734905   | 0.1840549   | 0.09731605  | 0           | 0.4703798   | 0.08611521  |
| 0.2890742   | 0.06913594  | 0.2554183   |             |             |             |
| HID1-AS1    | 0.1635072   | 0.1867296   | 0.2101729   | 0.038830871 | 0.13429774  |
| 0.3946854   | 0.7425828   | 0.3990566   | 0.1284326   | 0.06313555  | 0.03453292  |
| 0.433342453 | 0.4613209   | 0.312533693 | 0.366800483 | 0.05863955  | 0.114214    |
| 0.3142468   | 0.06052124  | 0.2288782   | 0.077135105 | 1.3229590   | 0.07623805  |
| 0.01977635  | 0.02466839  | 0.2351109   | 0.07698181  | 0.03777031  | 0.2745472   |
| 0.02520434  | 0.5962659   | 0           | 0.02131801  | 0           | 0.06126409  |
| 0.1236404   | 0.03639715  | 0.04687132  | 0.3133408   | 0           | 0.02385736  |
| 0.1307301   | 0.07072469  | 0.07344909  | 0.04561364  | 0.02884023  | 0           |
| 0.05084266  | 0.04619226  | 0.06484762  | 0           | 0           | 0.1203628   |
| 0.03901636  | 0.2651695   | 0.1051374   | 0.07960313  | 0.2073634   | 0.09429742  |
| 0.05770906  | 0           | 0           | 0.1026855   | 0.1332483   | 0.081922012 |
| 0.08931326  | 0.122030734 | 0.03370639  | 0           | 0.05534185  | 0           |
| 0.1387276   | 0.1349288   | 0.02887364  | 0.0308573   | 0.176423779 | 0.05171896  |
| 0.09127921  | 0.1122020   | 0.08659887  | 0.04519772  | 0.118539427 | 0           |
| 0.1033319   | 0           | 0.1804347   | 0.0609053   | 0.1515998   | 0.02690924  |
| 0.2716026   | 0.19878     | 0.07932814  | 0.0206733   | 0.1901609   | 0           |
| 0.195142679 | 0.03992676  | 0           | 0.08610394  | 0           | 0.1273155   |
| 0.05715017  | 0           | 0.02521985  | 0.09160442  | 0.03104623  | 0.08544584  |
| 0.0843030   | 0.1036685   | 0.2139320   | 0.08372211  | 0.02550449  | 0.3561436   |
| 0.05351347  | 0.08464215  | 0.1629980   | 0.05008483  | 0.046797227 | 0           |
| 0           | 0.0273301   | 0.08258418  | 0.05706623  | 0.06606356  | 0.06963607  |
| 0.05486178  | 0.03663419  | 0.08308135  | 0.3182578   | 0           | 0.3442251   |
| 0.05904739  | 0           | 0           | 0.1715970   | 0.046117343 | 0.1294804   |
| 0.07833061  | 0.09299077  | 0           | 0.099424481 | 0.03131612  | 0.03073807  |
| 0           | 0.2956856   | 0.09880638  | 0.04040202  | 0.02551284  | 0.1856884   |
| 0.2544450   | 0           | 0           | 0.1084436   | 0.04654215  | 0.09623369  |
|             |             |             |             |             | 0.06610756  |

|             |             |             |             |             |             |             |            |
|-------------|-------------|-------------|-------------|-------------|-------------|-------------|------------|
| 0.1386471   | 0           | 0.1174057   | 0.1639572   | 0.05304527  | 0.02904181  | 0.10891     | 0          |
| 0.1174124   | 0           | 0.2019392   | 0.02939203  | 0.06960093  | 0           | 0.1842436   |            |
| 0.2809465   | 0.02120056  | 0.06869755  | 0.02616445  | 0.08498077  | 0.05452126  |             |            |
| 0.1557264   | 0.370661975 | 0.1257722   | 0.2049554   | 0.1142192   | 0.01900546  |             |            |
| 0.02403665  | 0.1093560   | 0.08334371  | 0.09381334  | 0.1946931   | 0           | 0.3918172   |            |
| 0.1383838   | 0.085614311 | 0.037677796 | 0.07984546  | 0.22708703  | 0.027096807 |             |            |
| 0.07747359  | 0           | 0.3315785   | 0.1075370   | 0.1367657   | 0           | 0.07357989  | 0.06165875 |
| 0.04195235  | 0.034399826 | 0.0432860   | 0.3444507   | 0.1095920   | 0.0369202   |             |            |
| 0.02661285  | 0           | 0.09792061  | 0.49256     | 0.1195227   | 0.2511587   | 0.053020045 | 0          |
| 0.025395464 | 0.2359623   | 0.1547751   | 0           | 0.03315022  | 0           | 0.06730166  |            |
| 0.0663061   | 0.1545694   | 0.02872036  | 0.163438583 | 0.1754988   | 0.03200834  |             |            |
| 0.0147778   | 0.0434816   | 0.1298970   | 0.06867178  | 0.1769510   | 0.02795884  | 0.2999923   |            |
| 0.1227691   | 0.08775816  | 0.0535582   | 0           | 0.0260840   | 0.132071954 | 0.194174    |            |
| 0.1036568   | 0.11669     | 0.05105092  | 0           | 0           | 0.07733514  | 0.03959187  | 0.3797324  |
| 0.08836711  | 0.051374408 | 0.063925423 | 0.04254977  | 0.09421718  | 0.02853863  |             |            |
| 0.02619218  | 0           | 0.1750245   | 0.08166175  | 0.1586193   | 0.07845843  | 0.3662836   |            |
| 0.03222758  | 0           | 0.07520915  | 0.5059187   | 0           | 0.1986409   | 0.1954151   |            |
| 0.07274279  | 0.166006328 | 0.1257466   | 0           | 0.1065438   | 0.02969222  | 0           |            |
| 0.2369749   | 0.8483243   | 0.1580353   | 0.02254931  | 0           | 0.1089615   | 0.117872271 |            |
| 0.3326719   | 0           | 0.08941978  | 0.02335504  | 0.1050772   | 0           | 0           | 0.1501732  |
| 0.1212829   | 0.09812691  | 0.09478803  | 0           | 0           | 0.04519059  | 0.1891366   |            |
| 0.02415575  | 0.3600221   | 0.118343477 | 0.03975527  | 0           | 0.03303006  | 0.133990838 |            |
| 0           | 0.2134768   | 0           | 0.2392558   | 0.1385841   | 0.02846862  | 0           | 0.02868691 |
| 0.07212557  | 0.02226973  | 0.2439494   | 0.01680296  | 0.02287541  | 0.06547403  | 0           |            |
| 0.3438298   | 0.06364805  | 0.05806281  | 0.02455583  | 0.09723905  | 0.05102605  | 0           |            |
| 0.1978710   | 0.09888747  | 0           | 0           | 0.01821068  | 0.04873767  | 0.06545553  | 0.01560796 |
| 0.0205612   | 0.06838224  | 0.05437821  | 0.01479207  | 0.03191788  | 0.02220381  |             |            |
| 0.09605346  | 0.02674857  | 0.2023196   | 0.02198968  | 0.2328033   | 0.1252778   | 0           |            |
| 0.04112677  | 0.04535757  | 0.0957938   | 0.01959324  | 0           | 0.01944471  | 0.3337066   |            |
| 0           | 0.05255997  | 0           | 0.03448207  | 0.05049568  | 0.2412756   | 0.01978704  |            |
| 0.02751067  | 0           | 0.05295095  | 0.0474753   | 0.038823545 | 0           | 0.07552579  |            |
| 0.05292105  | 0.1168191   | 0.1734010   | 0.090646907 | 0.598118959 | 0           | 0           | 0.03337836 |
| 0           | 0           | 0.1266077   | 0.01786393  | 0.05325194  | 0.1791342   | 0.2121862   |            |
| 0.1109410   | 0.1113236   | 0           | 0.108090901 | 0           | 0.1680207   | 0.02961274  | 0.03966388 |
| 0.1156082   | 0.04076237  | 0.1119633   | 0.02677156  | 0.1767165   | 0.04030049  |             |            |
| AC008764.6  | 0.1645960   | 0.1323984   | 0.3973883   | 0.137662852 | 0.15870371  | 0.0555252   |            |
| 0.08190304  | 0.2245606   | 0.07588635  | 0.06217432  | 0.3672774   | 0.195083394 |             |            |
| 0.1453752   | 0.235961176 | 0.19702693  | 0.1154936   | 0.3036828   | 0.6739404   |             |            |
| 0.1191996   | 1.3107510   | 0.334227268 | 1.00503     | 0.4204331   | 0.3661349   | 0.5150077   |            |
| 0.3148827   | 0.9779461   | 1.4357370   | 0.3244407   | 0.486483969 | 0.5149186   |             |            |
| 1.11604375  | 0.9824934   | 0.4805059   | 0.2051266   | 0.288198066 | 1.081211    |             |            |
| 0.6164997   | 0.9416175   | 0.7899398   | 0.2725765   | 0.1127719   | 0.8026973   |             |            |
| 1.0814140   | 0.09750709  | 1.4466170   | 0.8714322   | 1.0110810   | 0.8786230   | 0.1752121   |            |
| 0.5607682   | 0.3760424   | 0.4342503   | 0.398858665 | 0.3161421   | 0.5499807   |             |            |

1.2191490.2878329 0.6147575 0.6151117 0.9525375 0.2613040.4900952  
0.4457365 0.9092873 0.967204581 0.47964 0.8898744 0.8188102  
0.527075163 0.4620989 0.4552261 0.7476046 0.636916091 0.5510075  
0.4558723 0.4141946 0.6856203 0.6645697 0.8997346 0.229514  
0.3366154 0.2502196 0.1823250.083394131 0.2648441 0.1888768  
0.5752928 0.8287032 1.7738330.3649787 0.303510205 1.2431140.3024111  
2.21834 0.734361198 0.6965354 0.3358770.4777336 0.9221844 0.4561776  
0.5438507 0.6655623 0.6666273 0.3745974 0.4119847 0.252181779  
1.6305990.40356053 0.5190093 0.8350639 0.1695861 0.3673531.93439  
0.3743945 0.1800962 1.2253170.6059956 0.1804195 2.5926380.6058436  
0.2283890.3763551 1.5926072.1261960.1758879 1.1252050.2805772  
0.297771187 0.5972524 0.2917372 0.1685422 0.2762049 0.460847514  
0.8024768 0.1371950.7675755 0.6226336 0.1614841 0.4066343  
1.3412450.4944390.2125852 0.9416339 0.2377167 0.1731669 0.6218051  
0.8357663 1.8857830.6327709 0.4260278 0.3458324 1.6397850.332210563  
0.2435941 0.5294847 0.445069133 0.6630474 0.6190206 0.6760931  
0.3188373 1.35531 0.5894795 0.55809138 0.3330649 0.4358893  
0.7398307 0.4250504 0.6141332 0.3405573 0.5092724 0.7436827  
0.1056532 0.329673981 0.4581873 0.5927012 1.0248890.4366381  
0.5268434 0.3941686 1.1277461.3801430.2730724 0.4512845 1.600157  
0.3275352 0.7522225 0.2287973 0.2917250.9524787 1.0174980.2610576  
0.268467382 0.8451806 2.1933210.4153131 1.41522 0.4094703 0.3340445  
0.24354593 1.3398370.7476035 0.3006707 0.4600665 0.271156779  
0.4644651 0.7804288 0.5848971 0.7561309 0.8900181 0.5528143  
0.2458586 0.3064127 0.8745786 0.2914281 0.4318329 0.5016074  
0.6541292 0.387829931 0.259729126 1.7613081.0734225 0.224147829  
1.0477720.725271904 0.3114597 0.3106393 2.4550880.626648793 1.333258  
0.4857601 1.8839020.325210532 0.4262698 0.7952099 1.2502190.770882  
0.4508405 0.6918827 0.5263378 1.3345880.1131809 0.4472714  
0.3957359 1.221780189 1.1166940.290102361 0.4861892 0.3183857  
0.1820399 1.60616 0.3498681.2901920.3003644 0.8321149 0.3620237  
0.413872127 0.5098392 0.6052035 0.4540478 1.2931520.1876150.4508418  
0.3717482 0.2202654 0.1668282 2.6598 0.6337618 0.1054856  
0.2851106 0.5137376 1.430673114 0.4241557 0.2041574 1.011238  
0.3619705 1.9196040.4102496 0.6803424 0.4132844 1.1621251.125481  
0.394619516 1.05759653 1.0894510.7793751 0.1911081 0.8460239  
1.3186810.22653 0.4825108 0.6039904 0.3708668 0.6389668 0.3554535  
0.3610408 0.2962564 0.5380735 0.2618743 0.3018085 0.5696222  
0.5348769 0.336299499 2.9125320.4001177 0.3217598 0.5497151  
0.5046147 1.4728050.5375674 0.2178809 0.5951210.7522670.5651272  
0.340494575 0.3822082 1.0496180.7866550.4691890.3000846 0.506955286  
0.3737893 0.1330981 1.2421390.4123006 0.1269491 0.6155229  
0.349395456 0.7120411 0.4683035 1.3511580.5034480.303008491 0.9865803  
0.8731427 0.3122611.042411806 0.208469657 0.2627833 0.2210746

|             |             |             |             |             |             |
|-------------|-------------|-------------|-------------|-------------|-------------|
| 0.4398112   | 0.4148815   | 0.5270615   | 0.3456839   | 0.7571043   | 0.5019275   |
| 0.4473858   | 0.4084001   | 0.3706559   | 0.4685646   | 0.438444991 | 0.3505267   |
| 0.9287179   | 1.2911880   | 0.2897060   | 0.3869116   | 0.4596413   | 0.2311463   |
| 0.1730265   | 1.4809241   | 1.1685830   | 0.8668198   | 0.4852223   | 0.8321112   |
| 1.20949     | 0.5156719   | 0.2028884   | 0.7289338   | 0.3771104   | 1.71361     |
| 0.2097628   | 1.0812590   | 0.6306071   | 1.4540410   | 0.2732426   | 0.3118305   |
| 1.3886540   | 0.6168522   | 1.0044150   | 0.6878721   | 1.1446020   | 0.2855650   |
| 0.07154275  | 0.1991462   | 0.4819848   | 0.6743852   | 3.084850    | 0.7684427   |
| 0.09507984  | 1.2730090   | 0.5892537   | 0.3741271   | 1.5713265   | 1.440041    |
| 1.3870510   | 0.2431130   | 0.229394796 | 0.3300492   | 1.2792660   | 0.3543843   |
| 1.3804870   | 0.1821451   | 0.14282693  | 0.405240772 | 0.3596808   | 0.436946819 |
| 0.8151806   | 0.7132475   | 0           | 0.9351009   | 0.2181402   | 0.2517177   |
| 0.6879871   | 0.6965189   | 0.8108919   | 0.4735962   | 0.4727492   | 0.442812218 |
| 0.6749046   | 1.2575160   | 0.5132493   | 0.3906      | 0.5161114   | 0.4977580   |
| 0.2940233   | 0.6010984   | 0.8237234   | 0.9762983   |             |             |
| AC104170.1  | 0.04367696  | 0.04489223  | 0.05052829  | 0.093354454 | 0.046124171 |
| 0.1016652   | 0.1071159   | 0.1027911   | 0           | 0.01897326  | 0.08302162  |
| 0.074415107 | 0.1330890   | 0.031307148 | 0           | 0           | 0.03432316  |
| 0.04197167  | 0.1940012   | 0.2116358   | 0.278164207 | 0           | 0.1145538   |
| 0.09508984  | 0.2075710   | 0.08478556  | 0.1388057   | 0.2043106   | 0.2200157   |
| 0.060594506 | 0.02756732  | 0.046023569 | 0           | 0.02875143  | 0.1104651   |
| 0.118847524 | 0.1783486   | 0.3500139   | 0.1126847   | 0.07533119  | 0.1808262   |
| 0.05735619  | 0.1042353   | 0.09428761  | 0           | 0.05886038  | 0.05483056  |
| 0.06933567  | 0.1564048   | 0.1604043   | 0.1222323   | 0.07403479  | 0.1559021   |
| 0.115920576 | 0.2756418   | 0.08681035  | 0.2610794   | 0.06756594  | 0.07035029  |
| 0.1062503   | 0.1263819   | 0.1594802   | 0.03560918  | 0.1511355   | 0.1387401   |
| 0.119657156 | 0           | 0.1481215   | 0           | 0.131300766 | 0.1007251   |
| 0.1543531   | 0.1342004   | 0.146688862 | 0.08103454  | 0.3007892   | 0.06652449  |
| 0           | 0.2150926   | 0.1664031   | 0           | 0           | 0.17354     |
| 0.07418496  | 0.127243699 | 0.08289273  | 0.1067371   | 0           | 0.1348741   |
| 0.2290144   | 0.1629918   | 0.047497361 | 0           | 0.07853997  | 0.06210585  |
| 0.320141871 | 0.04337884  | 0.07321213  | 0.04555821  | 0.4205065   | 0.02245293  |
| 0.1632420   | 0.1991220   | 0.03178586  | 0.02485065  | 0.05714644  | 0.168342031 |
| 4.1827020   | 0           | 0.2352277   | 0.2070051   | 0.1345227   | 0.06558921  |
| 0.211576    | 0.03434911  | 0           | 0.1212636   | 0.1651717   | 0.1119588   |
| 0.1540672   | 0.1327537   | 0.1688961   | 0.02076938  | 0.1186893   | 0.1341859   |
| 0.03065806  | 0.1427026   | 0.045434262 | 0.06432666  | 0.1017454   | 0.09796708  |
| 0.1505130   | 0.281266521 | 0.05762015  | 0.07612132  | 0.05577025  | 0.1101474   |
| 0           | 0.09927154  | 0.1143289   | 0.03970634  | 0.02092677  | 0.2210393   |
| 0.4616320   | 0.02201834  | 6.4914970   | 0.3188054   | 0.1300497   | 0.04597566  |
| 0.1344906   | 0.09893906  | 0.1419576   | 0.077983169 | 0.2477857   | 0.2406492   |
| 0.332616232 | 0.1245151   | 0.1259345   | 0.1996627   | 0.03138616  | 0           |
| 0.1332495   | 0.119514678 | 0.1129320   | 0.1147975   | 0.06709104  | 0.09693635  |
| 0.2078504   | 0.04856584  | 0.1226724   | 0.09920423  | 0.160966482 | 0.3058594   |
| 0.07536252  | 0.6061193   | 0.08883031  | 0.1086302   | 0.08392002  | 0.1156791   |
| 0.03973279  | 0.05555426  | 0.1311571   | 0.02822587  | 0.07038828  | 0.1275277   |
| 0.03491014  | 0.1309168   | 0.04212471  | 0.1058530   | 0.1138070   | 0.030343003 |
| 0.07066225  | 0.05577656  | 0.1491034   | 0.1107364   | 0.06754318  | 0.1274222   |



|             |             |             |             |             |             |             |
|-------------|-------------|-------------|-------------|-------------|-------------|-------------|
| 0.165157827 | 0.0943541   | 0.4086096   | 0           | 0           | 0.063651393 | 0.07559318  |
| 0.1231849   | 0.1372989   | 0.0913832   | 0.05778722  | 0.08763535  | 0.1563057   |             |
| 0.05009227  | 0.07517982  | 0.3276473   | 0.07321061  | 0.1883959   | 0.133077    |             |
| 0.102913958 | 0.090582311 | 0.2879383   | 0.030330372 | 0.065144242 | 0.124171    |             |
| 0.075025627 | 0.3065991   | 0.04308882  | 0.3288026   | 0.267721371 | 0.3537912   |             |
| 0.1235297   | 0.1260736   | 0.165403292 | 0.1040652   | 0.1617787   | 0.2661764   |             |
| 0.1505562   | 0.08876096  | 0.3518941   | 0.06177631  | 0.1177069   | 0.04934076  |             |
| 0.4070764   | 0.1725195   | 0.223067374 | 0.2129831   | 0.152634977 | 0.1963675   |             |
| 0.1653775   | 0.1333241   | 0.1195462   | 0.07626179  | 0.7011417   | 0.03985211  |             |
| 0.1548354   | 0.2071424   | 0.028066255 | 0.1582207   | 0.0384761   | 0.05329163  | 0           |
| 0.3643375   | 0.05503196  | 0.1772555   | 0.20165     | 0.04242473  | 0.1106823   |             |
| 0.2109820   | 0.03219022  | 0.1087562   | 0.2508373   | 0.264598433 | 0.1485334   |             |
| 0.06230112  | 0.1122151   | 0.06136651  | 0.03707535  | 0.03477574  | 0.3718474   |             |
| 0.11898     | 0.03511254  | 0.1062230   | 0.123510745 | 0.11526376  | 0.02557379  | 0.2265103   |
| 0.06861056  | 0.1574235   | 0.1749616   | 0.06011165  | 0.08180227  | 0.2224492   |             |
| 0.3458111   | 0.2515981   | 0.07747929  | 0.0661056   | 0.2712188   | 0.1216294   |             |
| 0.3829220   | 0.2387792   | 0.1879213   | 0.08744155  | 0           | 0.2418489   | 0.03213179  |
| 0.1280725   | 0.2141519   | 0.4234707   | 0.1582551   | 0.4877022   | 0           | 0.08131721  |
| 0.1556363   | 0.04365962  | 0.07084506  | 0.03332443  | 0           | 0.07165892  | 0.08422281  |
| 0.06315483  | 0.146341254 | 0.07866648  | 0.1805179   | 0.14579     | 0.1179549   | 0           |
| 0.04581326  | 0.14408419  | 0.02716101  | 0.2598337   | 0.08711035  | 0.1081925   |             |
| 0.023709423 | 0           | 0.04593969  | 0.3573385   | 0.040266421 | 0.031808534 | 0.08019155  |
| 0.1475767   | 0.1917340   | 0.1665871   | 0.1026634   | 0.05860538  | 0.06896706  |             |
| 0.1444994   | 0.2141573   | 0.4765199   | 0.1413877   | 0.2199819   | 0.157408066 |             |
| 0.1002821   | 6.90811     | 0.3060364   | 0           | 0.05903541  | 0.08766573  | 0.1533416   |
| 0.1680037   | 0           | 0.07924611  | 0.2404734   | 0.1993270   | 0.06567127  | 0.2343434   |
| 0.1573636   | 0.05628536  | 0.07414769  | 0.0821999   | 0           | 0.1955913   | 0.07673472  |
| 0.1067617   | 0.07697499  | 0.3858422   | 0.1737152   | 0.02643302  | 0           | 0.150592    |
| 0.0532154   | 0.07415557  | 0.05452274  | 0.03838346  | 0.04710468  | 0.02729018  |             |
| 0.1168690   | 0.04457077  | 0.08574868  | 0.1895415   | 0.05390798  | 0.04144968  |             |
| 0.1213982   | 0.08700869  | 0.04757061  | 0.1653480   | 0.4034419   | 0.1591262   |             |
| 0.1426710   | 0.280010521 | 0.1071474   | 0.0605246   | 0           | 0.0936161   | 0.1621195   |
| 0.027240866 | 0.057518224 | 0.06652182  | 0.038097049 | 0.04012296  | 0.2457409   |             |
| 2.1708030   | 0.09511916  | 0.08589441  | 0           | 0.1614982   | 0.2975718   | 0.05927032  |
| 0.05352729  | 0.1131492   | 0.2338781   | 0.2826839   | 0.06732393  | 0.07119286  | 0           |
| 0.16213     | 0.1714966   | 0           | 0.03218115  | 0.03540413  | 0           |             |
| AC068790.2  | 0.02658256  | 0.0546444   | 0           | 0.056817163 | 0.028071982 | 0.1650006   |
| 0.08341399  | 0           | 0.06928474  | 0           | 0.226451718 | 0.1080004   | 0.114324488 |
| 0.04879099  | 0.04290057  | 0.2088968   | 0.4087151   | 0           | 0.1288053   | 0.112863754 |
| 0.4608923   | 0.1394390   | 0.02893667  | 0.1443787   | 0.3440132   | 0.1689592   |             |
| 0.3315921   | 0.3570811   | 0.036878882 | 0.03355591  | 0.112043016 | 0.1247697   | 0           |
| 0.08964135  | 0.028933078 | 0.2170922   | 0.1597684   | 0.1371638   | 0           | 0           |
| 0.1903183   | 0.6503644   | 0.05174203  | 0.2149408   | 0.1668542   | 0.1265967   |             |
| 0.1087894   | 0.06508326  | 0           | 0.1126472   | 0.1423271   | 0.105826953 | 0.04194012  |

|                   |                           |                   |                     |             |                   |                   |
|-------------------|---------------------------|-------------------|---------------------|-------------|-------------------|-------------------|
| 0.1761144         | 0.2383463                 | 0.2193164         | 0                   | 0           | 0.1025577         | 0.03882498        |
| 0.04334474        | 0.09198372                | 0.2955388         | 0.194201201         | 0           | 0.4807965         | 0.6238985         |
| 0.159823913       | 0.04086871                | 0                 | 0.1960242           | 0.178554845 | 0.2219357         | 0.09153281        |
| 0                 | 0.09095591                | 0.1122078         | 0                   | 0.04059712  | 0.1974272         | 0.1689912         |
| 0.09030054        | 0.464656525               | 0.1008999         | 0.07795452          | 0.6677967   | 0                 | 0.6588977         |
| 0.09919967        | 0.317985028               | 0.2112626         | 0.0239004           | 0.1889936   | 0.324739959       |                   |
| 0.3168135         | 0.08911638                | 0                 | 0.4724818           | 0.08199149  | 0.03311732        | 0.3878053         |
| 0.1160726         | 0.2117436                 | 0.1391213         | 0.409823688         | 12.289420   | 0.175262          |                   |
| 0.4294911         | 0                         | 0.1091639         | 0.4258              | 0.1030151   | 0.08362189        | 0                 |
| 0.2680704         | 0.04542671                | 0.06251199        | 0.2019906           | 0.08223453  | 0.6067494         |                   |
| 0.3611819         | 0.04083394                | 0                 | 0.08685131          | 0.055304182 | 0.05220045        | 0.2786581         |
| 0                 | 0.07328391                | 0                 | 0.1753432           | 0           | 0.1357710.1340753 | 0.1999464         |
| 0.2416736         | 0.2226642                 | 0.04833196        | 0.0764184           | 0.2306201   | 0.1605471         |                   |
| 0.05360299        | 5.40961                   | 0.07761223        | 0.07915053          | 0.05596319  | 0.0545689         |                   |
| 0.08028807        | 0.1295968                 | 0.047461929       | 0.06032269          | 0.04184667  | 0.303654136       |                   |
| 0.07578208        | 0.6131675                 | 0.08101214        | 0.03820434          | 0.4989002   | 0                 | 0.072738736       |
| 0.09164323        | 0.2248791                 | 0.04657852        | 0.1361093           | 0.03933145  | 0.4698625         |                   |
| 0.2216852         | 0.07466056                | 0.1207549         | 0.195934066         | 0.1063723   | 0.1376009         |                   |
| 0.08853477        | 0.03604246                | 0.2644570.1362005 | 0.4928305           | 0           | 0                 | 0.1197368         |
| 0                 | 0.1713582                 | 0.3104625         | 0.04249385          | 0.03187131  | 0.05127568        | 0.04294932        |
| 0.1385299         | 0.036934571               | 0                 | 0.2036796           | 0.1814939   | 0.2021883         | 0.08221594        |
| 0.4032673         | 0                         | 0.07656742        | 0                   | 0.05318352  | 0.1708936         | 0.15495743        |
| 0.04600734        | 0.4498349                 | 0.04178125        | 0.1668523           | 0.1406813   | 0.4800277         |                   |
| 0.07610433        | 0.04064938                | 0.4118018         | 0.3418490.3564581   | 0.02866526  |                   |                   |
| 0.3239721         | 0.062635245               | 0.110259977       | 0.8178068           | 0.110757588 | 0.039647932       |                   |
| 0.03778634        | 0.13698575                | 0.4105236         | 0.05244922          | 0.1429393   | 0.931085352       |                   |
| 0.2691544         | 0.2405835                 | 0.03069225        | 0                   | 0.06333589  | 0.1969227         | 0.1439997         |
| 0.1603545         | 0.1080430.1946990.1503926 | 0.2292432         | 0.1201186           | 0.1457376   |                   |                   |
| 0.0524992         | 0.271525456               | 0                 | 0.074317066         | 0.07967516  | 0.1006517         | 0.08114336        |
| 0                 | 0.3248999                 | 0.1313007         | 0.09701879          | 0           | 0.1680940         | 0.1604931         |
| 0.1873378         | 0.04324563                | 0.1272442         | 0                   | 0           | 0.04315232        | 0.1636370.1032818 |
| 0.5838146         | 0                         | 0                 | 0.0381660.161039262 | 0.2066287   | 0.07583512        |                   |
| 0.1024442         | 0.09959664                | 0.2256471         | 0.04233026          | 0           | 0.02896533        | 0.3846620         |
| 0.037585406       | 0.327373911               | 0.2179052         | 0.2067873           | 0.08351519  | 0.1916214         | 0                 |
| 0.2195101         | 0.1194871                 | 0                 | 1.8750670.07656352  | 0.2829315   | 0.08046607        |                   |
| 0.02751143        | 0.1480516                 | 0.4863716         | 0                   | 0.2573375   | 0.03547898        | 0.10409989        |
| 0.03679838        | 0.07822389                | 0.0779472         | 0                   | 0.04686032  | 0.07705349        | 1.133328          |
| 0.2312366         | 0.1979643                 | 0.1420845         | 0.4782962           | 0.057490067 | 0                 | 0.1856595         |
| 0.1744515         | 0.1025190.03843714        | 0.254473892       | 0.09575561          | 0.02746659  |                   |                   |
| 0.08873034        | 0.2871577                 | 0.05547738        | 0                   | 0.140307477 | 0.06612267        | 0.07906969        |
| 0.1767230.2107131 | 0.057719888               | 0.05816975        | 0                   | 0.09665889  | 0.147041113       | 0                 |
| 0.1171344         | 0.1026489                 | 0.07779511        | 0.2433308           | 0.2499309   | 0                 | 0.2098728         |
| 0.1407118         | 0.1955098                 | 0.1338546         | 0.04917204          | 0.03347121  | 0.127735092       |                   |
| 0.0813779         | 11.786690.2793887         | 0.1415954         | 0.10779             | 0.2134196   | 0.335975          |                   |

|             |             |             |             |             |             |             |
|-------------|-------------|-------------|-------------|-------------|-------------|-------------|
| 0.02921429  | 0.2316192   | 0.1929223   | 0.2276654   | 0           | 0.3197495   | 0.1426255   |
| 0.6225327   | 0           | 0.09025518  | 0.0500283   | 0.5171788   | 0.2597243   | 0.0934042   |
| 0.2274196   | 0           | 0.03913839  | 0.2960332   | 0.03217521  | 0.09732479  | 0.1833059   |
| 0.06477566  | 0.2106178   | 0.0663670   | 0.4204952   | 0.2293499   | 0.09965571  |             |
| 0.08535426  | 0.05425311  | 0.2087526   | 0.8459608   | 0.2624747   | 0           | 0.3324828   |
| 0           | 0           | 0.4427884   | 0           | 0.0387388   | 0.06946566  | 0           |
| 0.1548677   | 0           | 0.05638215  | 0.29842687  | 0.21003962  | 0.1619454   | 0.370984547 |
| 0.04883907  | 0.3418565   | 0           | 0.5094425   | 0.07841527  | 0.1558360   | 0.06552711  |
| 0.01803648  | 0.0651553   | 0.1377292   | 0.031631628 | 0           | 0.4097453   | 0           |
| 0.1160720   | 0.2537362   | 0.1491083   | 0.3822566   | 0.6267524   | 0.04309515  |             |
| 0.1769025   |             |             |             |             |             |             |
| PRR34       | 0.1051224   | 0.3889704   | 0.0851286   | 0.23592132  | 0.027753096 | 0.08156311  |
| 0.30937     | 0.3463590   | 0.4366002   | 0.1552614   | 0.04995444  | 0.179103453 | 0.2295632   |
| 0.324007315 | 0.279773112 | 0.0169653   | 0.09087048  | 0.4444795   | 0.07003878  |             |
| 0.04074946  | 0.0334745   | 0.06379195  | 0.0661704   | 0.1258750   | 0.06423238  |             |
| 0.1632506   | 0.1614719   | 0.07649258  | 0.02647686  | 0.204175735 | 0.3980967   |             |
| 0.160616865 | 0.04317332  | 0.2767975   | 0.1329346   | 0.034325291 | 0.1717009   |             |
| 0.06318141  | 0.1491663   | 0.1631775   | 0.1305646   | 0.07592518  | 0.10035     |             |
| 0.2571906   | 0.04092341  | 0.1558327   | 0.2177456   | 0.1251586   | 0.04302144  |             |
| 0.02573758  | 0.1176763   | 0.08018465  | 0.1219490   | 0.146474721 | 0.0414637   |             |
| 0.04178731  | 0.0314185   | 0.1084125   | 0.05079605  | 0.2557249   | 0.1216712   |             |
| 0.06909111  | 0.02571142  | 0.1818776   | 0.3255738   | 0.047998788 | 0.2025615   |             |
| 0.06535854  | 0.06168112  | 0.079004188 | 0.06464713  | 0.01857498  | 0.1356582   |             |
| 0.132394899 | 0.5070916   | 0.1628875   | 0.1841290   | 0.0269768   | 0.04437328  | 0           |
| 0.07224472  | 0.0520492   | 0.1837786   | 0.1249847   | 0.040833619 | 0.06483995  |             |
| 0.1644138   | 0.2244717   | 0.04057714  | 0.2304999   | 0.06538187  | 0.074306309 |             |
| 0.1133826   | 0.3733367   | 0.1046341   | 0.051368167 | 0.1252859   | 0.4228994   |             |
| 0.0548251   | 0.02335573  | 0.1134841   | 0.03274112  | 0.07668001  | 0.04590162  |             |
| 0.06579203  | 0.09627867  | 0.173643537 | 0.5380635   | 0.261116768 | 0.1039627   |             |
| 0.08492245  | 0.2242004   | 0.04316952  | 0.2262676   | 0.05092246  | 0.07440478  |             |
| 0.2057047   | 0.05837182  | 0.1192613   | 0.02694641  | 0.1359641   | 0.02396353  |             |
| 0.2195110   | 0.1699595   | 0.01428316  | 0.08881418  | 0.007378829 | 0.2404212   |             |
| 0.131222276 | 0.02064299  | 0.1530515   | 0.3242095   | 0.08694172  | 0.270782679 |             |
| 0.07627459  | 0.2198520   | 0.1476516   | 0.07953134  | 0.2213962   | 0.1314106   |             |
| 0.02201348  | 0.07645268  | 0.04533019  | 0.09120016  | 0.1031701   | 0.04239526  |             |
| 1.37009     | 0.007673059 | 0.007825141 | 0.06639297  | 0.03236941  | 0.1508145   |             |
| 0.2647910   | 0.04692278  | 0.03578247  | 0.04137131  | 0.166780414 | 0.1947952   |             |
| 0.2273258   | 0.1041194   | 0.1435273   | 0.0627751   | 0.1122475   | 0.079103698 |             |
| 0.05436132  | 0.05335789  | 0.02762964  | 0.0215301   | 0.03888466  | 0.1929565   |             |
| 0.1198113   | 0.04428747  | 0.2626429   | 0.135595833 | 0.09464751  | 0.009069185 |             |
| 0.08752905  | 0.09977249  | 0.1202683   | 0.1615840   | 0.08352551  | 0.1051925   |             |
| 0.1337089   | 0.2367533   | 0.1494558   | 0.2439527   | 0.09975411  | 0.008402228 |             |
| 0.3213945   | 0.09124778  | 0.1698457   | 0.1095650   | 0.138757034 | 0.1275533   |             |
| 0.3557463   | 0.1345741   | 0.05996745  | 0.4226664   | 0.1533409   | 0.231877602 |             |

|             |             |             |             |             |             |
|-------------|-------------|-------------|-------------|-------------|-------------|
| 0.1438255   | 0.1721034   | 0.1261905   | 0.1802158   | 0.291074633 | 0.1410026   |
| 0.1087105   | 0.09087459  | 0.08797701  | 0.06954159  | 0.1265533   | 0.1053357   |
| 0.1004691   | 0.08142479  | 0.1351863   | 0.1057227   | 0.06801512  | 0.03202919  |
| 0.03715424  | 0.092656347 | 0.06930144  | 0.124099349 | 0.109753132 | 0.07471421  |
| 0.11737236  | 0.04427566  | 0.2281551   | 0.02826312  | 0.138076289 | 0.1064388   |
| 0.1248716   | 0.03641232  | 0.129380956 | 0.1001863   | 0.01297905  | 0.3915007   |
| 0.07700172  | 0.1281788   | 0.07699493  | 0.1189474   | 0.05665978  | 0.1781312   |
| 0.02881641  | 0.1505182   | 0.084367182 | 0.1025222   | 0.227765847 | 0.2835723   |
| 0.08955748  | 0.2085762   | 0.2109988   | 0           | 0.02596183  | 0.08632503  |
| 0.04154614  | 0.16887576  | 0.0571212   | 0.04630244  | 0.1752929   | 0.02515975  |
| 0.1064799   | 0.05960331  | 0.1365188   | 0.03235563  | 0.2961147   | 0.03551893  |
| 0.04231623  | 0.07747593  | 0.4711612   | 0.06791841  | 0.127367936 | 0.1174619   |
| 0.08996839  | 0.1485446   | 0.1181583   | 0.2230839   | 0.1339181   | 0.05966455  |
| 0.04009081  | 0.1521169   | 0.07669776  | 0.126338733 | 0.08322559  | 0.04308599  |
| 0.01362922  | 0.1568763   | 0.2803781   | 0.05053205  | 0.2097826   | 0.2598856   |
| 0.2600486   | 0.3253550   | 0.3936077   | 0.05594351  | 0.1060693   | 0.06527738  |
| 0.2634657   | 0.09616932  | 0.0738897   | 0.1074193   | 0.1052279   | 0.096056199 |
| 0.03638036  | 0.08506883  | 0.2106355   | 0.04295201  | 0.1111872   | 0.2056811   |
| 0.1280519   | 0.04572196  | 0.05871467  | 0.02809409  | 0.02627016  | 0.051153302 |
| 0.41707     | 0.04894679  | 0.1983403   | 0.1418961   | 0.1140015   | 0.251583169 |
| 0.1940691   | 0.1683584   | 0.07602608  | 0.1892638   | 0.1974498   | 0.06615844  |
| 0.235813188 | 0.1961146   | 0.07035434  | 0.4053399   | 0.1562396   | 0.051357792 |
| 0.04600717  | 0.2211367   | 0.2293461   | 0.319815725 | 0.137803106 | 0.185286    |
| 0.2587812   | 0.1153671   | 0.05613222  | 0.03294558  | 0.1269471   | 0.09129505  |
| 0.0834680   | 0.3543630   | 0.06175592  | 0.1458404   | 0.03309099  | 0.044199425 |
| 0.1689523   | 2.4300340   | 0.1565218   | 0.1735838   | 0.1634005   | 0.2320948   |
| 0.07381298  | 0.2946007   | 0.06869643  | 0.03814616  | 0.01286167  | 0.02741391  |
| 0.1211783   | 0.0846032   | 0.06628041  | 0.08579671  | 0.05948661  | 0.1187040   |
| 0.08652834  | 0.05991392  | 0.1108118   | 0.09635838  | 0.2871602   | 0           |
| 0.1421542   | 0.02886576  | 0.2627742   | 0.1793115   | 0.07734081  | 0.05249048  |
| 0.02771457  | 0.03401169  | 0.1510696   | 0.09563596  | 0.2360020   | 0.05159532  |
| 0.09884148  | 0.09730992  | 0.2294520   | 0.1533961   | 0.2303553   | 0.09159496  |
| 0.1830626   | 0.01765473  | 0.0153195   | 0.1030148   | 0.011232229 | 0.1340997   |
| 0.138388    | 0.06124339  | 0.01126583  | 0.2452633   | 0.268811361 | 0.145357557 |
| 0.2641745   | 0.137538866 | 0.1255391   | 0.02534799  | 0.3918541   | 0.1190458   |
| 0.1963954   | 0.2233954   | 0.3368703   | 0.1637030   | 0.02139791  | 0.3414004   |
| 0.006808231 | 0.075053533 | 0.04859771  | 0.1053236   | 0.1884829   | 0.3213098   |
| 0.06689435  | 0.2476564   | 0.07018409  | 0.06970869  | 0.3408448   | 0.05829765  |
| AL139383.1  | 0.05787552  | 0.1388003   | 0.1785443   | 0.206170423 | 0.152795707 |
| 0.2394927   | 0.4258120   | 0.3480836   | 0.3239053   | 0.3184540   | 0.1100104   |
| 0.295818231 | 0.4506819   | 0.082969042 | 0.318683037 | 0.3424779   | 0.2425653   |
| 0.2039249   | 0.2784897   | 0.03739128  | 0           | 0.03344847  | 0.02023909  |
| 0.06300089  | 0.02496617  | 0.2452385   | 0.2807552   | 0           | 0.13382109  |
| 0.1339395   | 0.01131868  | 0.2412872   | 0.04879176  | 0.157482648 | 0.07877546  |
| 0           |             |             |             |             | 0.09954431  |

|             |             |             |             |             |             |             |            |   |
|-------------|-------------|-------------|-------------|-------------|-------------|-------------|------------|---|
| 0.03327332  | 0.0479219   | 0.02533387  | 0.02302004  | 0.06941042  | 0.1314281   |             |            |   |
| 0.01299913  | 0           | 0.1531257   | 0.009869006 | 0.02361653  | 0           | 0.05722624  |            |   |
| 0.06886099  | 0.038401051 | 0.04565599  | 0.1150308   | 0.08648787  | 0.06963474  |             |            |   |
| 0.04143105  | 0.03128673  | 0.09303687  | 0.3944720   | 0.01572835  | 0.03337781  |             |            |   |
| 0.04596048  | 0.03523455  | 0           | 0.09813652  | 0.09904642  | 0.014498684 | 0.04448965  |            |   |
| 0           | 0.0474204   | 0.080989453 | 0.04474057  | 0.01660709  | 0.04407519  | 0.06600969  |            |   |
| 0.1764380   | 0.0551244   | 0.05892533  | 0.0238799   | 0           | 0.08191759  | 0           | 0          |   |
| 0.06600319  | 0.0242321   | 0.1042528   | 0.009195841 | 0.02399749  | 0.115386098 |             |            |   |
| 0.04380578  | 0.008672654 | 0.1783065   | 0.212107025 | 0.0574805   | 0.08084336  | 0           |            |   |
| 0.02857463  | 0.01983464  | 0.04806865  | 0.1407215   | 0           | 0.02195276  | 0.06310307  |            |   |
| 0.021244467 | 0.5733539   | 0.025902489 | 0.1271934   | 0.1558479   | 0.01142911  |             |            |   |
| 0.01980595  | 0.2221060   | 0.07476146  | 0.04551537  | 0           | 0.09373241  | 0.02431844  |            |   |
| 0.01648383  | 0.06805052  | 0.02931825  | 0.01492008  | 0.03669483  | 0           | 0.0889036   |            |   |
| 0           | 0.06303085  | 0           | 0.1515343   | 0.3482873   | 0.02163573  | 0.02659227  |            |   |
| 0.124233682 | 0.03817569  | 0           | 0           | 0.02432571  | 0.01451077  | 0           | 0.7675749  | 0 |
| 0.1201619   | 0.4463163   | 0           | 0.02917609  | 4.4552710   | 0.04224431  | 0           | 0.1015358  |   |
| 0.1782110   | 0.0582677   | 0.09405269  | 0           | 0.04377816  | 0.1214780   | 0.04124816  | 0          |   |
| 0.08818977  | 0           | 0.1810341   | 0           | 0.026394447 | 0.01662713  | 0.01632021  |            |   |
| 0.2704285   | 0.06914529  | 0.02854412  | 0.03934554  | 0.0643537   | 0.02709181  |             |            |   |
| 0.04381789  | 0.106646848 | 0.01929946  | 0.09986147  | 0.3962243   | 0.0261572   |             |            |   |
| 0.04798129  | 0.06177826  | 0.02554738  | 0.07019891  | 0.1226899   | 0.8400039   |             |            |   |
| 0.02493438  | 0.4663510   | 0.04625878  | 0.04626012  | 0           | 0           | 0.06702381  |            |   |
| 0.1608278   | 0.01560554  | 0.02463616  | 0.01646451  | 0.06113945  | 0.02983341  |             |            |   |
| 0.04502528  | 0           | 0.1111350   | 0.03008005  | 0.009649257 | 0.02067052  | 0.028114426 |            |   |
| 0.05843082  | 0.01813666  | 0.1212881   | 0.03027255  | 0.03828638  | 0.019354    |             |            |   |
| 0.04142356  | 0.5457610   | 0.1162226   | 0.02067425  | 0.01616834  | 0.1144183   |             |            |   |
| 0.2498120   | 0.090912916 | 0.080019293 | 0.6570996   | 0.026793475 | 0.057547617 |             |            |   |
| 0.06855698  | 0.033138355 | 0.01354229  | 0.1141924   | 0.05186788  | 0.016892982 |             |            |   |
| 0.1367340   | 0.0890975   | 0.200908428 | 0.1378948   | 0.1429133   | 0.03918949  |             |            |   |
| 0.3324987   | 0.1176155   | 0.1412995   | 0.1364311   | 0.08318468  | 0           | 0.1057666   |            |   |
| 0.1714518   | 0.014075354 | 0           | 0.215737359 | 0.009637147 | 0.1187001   | 0.08833261  |            |   |
| 0.07040373  | 0.03368436  | 0           | 0.0528073   | 0.06838983  | 0           | 0.086776837 |            |   |
| 0.2096553   | 0.01699465  | 0.04707717  | 0.0577158   | 0.06896811  | 0.03646091  |             |            |   |
| 0.2035609   | 0           | 0.08432434  | 0.0488877   | 0.1242526   | 1.0805850   | 0.09607392  |            |   |
| 0.0692458   | 0.11687149  | 0.0656063   | 0           | 0.01239118  | 0.03614028  | 0           |            |   |
| 0.01536023  | 0.01368689  | 0.03153164  | 0.03101798  | 0.01563935  | 0.013638483 |             |            |   |
| 0.03394086  | 0           | 0           | 0.07576215  | 0.06953299  | 0           | 0.05310189  | 0.03613156 |   |
| 0.01403635  | 0.04165708  | 0.1944763   | 0.1197774   | 0.02919844  | 0.07986379  |             |            |   |
| 0.02686148  | 0           | 0.04520028  | 0.03112638  | 0.1416154   | 0.10073162  | 0.4005869   |            |   |
| 0           | 0.05656885  | 0.01576492  | 0.01700404  | 0.01398006  | 0.2545814   | 0.06293099  |            |   |
| 0.4190353   | 0.1031154   | 0.1157051   | 0.083444865 | 0.1913495   | 0.336848    |             |            |   |
| 0.07912826  | 0.4092076   | 0.2510559   | 0.461700188 | 0.2866586   | 0.01993341  |             |            |   |
| 0.1180566   | 0.1215666   | 0.2617014   | 0.02023543  | 0.025456438 | 0           | 0.04303761  |            |   |
| 0.1410790   | 0.04778794  | 0.178029193 | 0           | 0.1217477   | 0.0526114   | 0.035570858 |            |   |

|             |             |             |             |             |             |             |         |
|-------------|-------------|-------------|-------------|-------------|-------------|-------------|---------|
| 0.252893387 | 0.03542011  | 0.01862391  | 0.04234385  | 0.02943219  | 0.04534578  |             |         |
| 0.0776569   | 0.1370805   | 0.02552979  | 0.02364799  | 0.01619045  | 0.2765647   | 0           |         |
| 0.115876948 | 0           | 0.3390299   | 0.4055231   | 0.03082814  | 0.1564535   | 0.6969854   |         |
| 0           | 0.4134345   | 0.08404684  | 0.1575113   | 0.1062156   | 0           | 0.2610593   | 0       |
| 0.03314786  | 0.03275058  | 0.4538398   | 0.1732309   | 0.1020990   | 0.01694662  |             |         |
| 0.1886239   | 0.1529972   | 0.02840402  | 0.07672895  | 0           | 0.1765795   | 0.04988666  |         |
| 0           | 0.04367207  | 0.0602059   | 0.01695374  | 0.05201462  | 0.09643124  | 0.02064813  |         |
| 0.05905991  | 0           | 0           | 0.05952705  | 0.01830807  | 0.06702603  | 0.2049664   |         |
| 0.08404658  | 0.0730332   | 0.2429970   | 0.02811402  | 0.7688061   | 0.144292067 |             |         |
| 0.1041179   | 0.02673334  | 0           | 0.0826993   | 0.09206635  | 0.036096366 | 0.050810887 |         |
| 0.05876455  | 0.050481692 | 0           | 0.2015784   | 0.7191225   | 0.4201355   | 0.08536281  |         |
| 0.08482149  | 0.05944397  | 0.05632955  | 0.08508284  | 0.08274936  | 0.1249432   |             |         |
| 0.06886834  | 0.07134841  | 0.02973656  | 0           | 0.04211864  | 0.4705920   | 0.01082128  |         |
| 0.2476930   | 0.1563564   | 0           | 0.02139733  |             |             |             |         |
| AC090559.1  | 0.4789161   | 0.4648947   | 0.2462403   | 0.881457286 | 0.519798275 |             |         |
| 0.4128720   | 0.5655105   | 0.2713390   | 0.4467158   | 0.1733675   | 0.3034429   | 1.427927625 |         |
| 0.9188285   | 1.02984485  | 0.586017924 | 0.4293912   | 0.3345352   | 0.3068118   |             |         |
| 0.1034063   | 0.1160289   | 0.367136765 | 0.2306532   | 0.06978213  | 0.130332    |             |         |
| 0.07225421  | 0.4820512   | 0.8878326   | 0.5808076   | 0.4467524   | 0.719784328 |             |         |
| 1.6960960   | 0.686880062 | 0           | 0.3502869   | 0.4037485   | 0.04343861  | 1.3580450   | 0.39978 |
| 1.0639750   | 0.6424471   | 0.08812233  | 0.2096361   | 0.6667125   | 0.7466765   |             |         |
| 0.1812598   | 0.2330617   | 0.06680165  | 0.2745393   | 0.1497198   | 0.2931378   |             |         |
| 0.3164533   | 0.6201162   | 0.2611675   | 0.335419779 | 0.1259334   | 0.546445    |             |         |
| 0.09940018  | 0.08231754  | 0.1714196   | 0.2588956   | 0.2822871   | 0.582898    |             |         |
| 0.6941390   | 0.6904977   | 0.1479022   | 0.413048332 | 0.2229055   | 0.06015356  |             |         |
| 0.5073730   | 0.439910652 | 0.3476961   | 0           | 0.1308002   | 4.311505921 | 0.3208618   |         |
| 0.2290376   | 0.8510115   | 0.04551881  | 0.2058992   | 0.05068341  | 0.101584    |             |         |
| 0.1646705   | 0.5285718   | 0.1581679   | 0.284211893 | 0.0504953   | 0.3641146   |             |         |
| 1.3033740   | 0.10146     | 0.2316739   | 0.419538688 | 0.1057262   | 0.1076484   |             |         |
| 0.1324144   | 0.097509519 | 0.3699478   | 0.4905804   | 0.1942671   | 0           | 0.06838763  |         |
| 0.1325883   | 0.1698173   | 0.07745125  | 0.06055252  | 0.8876953   | 0.966880916 |             |         |
| 0.3953721   | 0.285788469 | 0.05847316  | 0.04776411  | 0.5674505   | 0.4097323   |             |         |
| 0.1198638   | 0.1546615   | 0.7951217   | 0           | 0.35088     | 0.3018501   | 0.3637402   |         |
| 0.03128408  | 0.1213033   | 0.08230841  | 0.4681229   | 0.0843515   | 0.5108829   |             |         |
| 0.0186758   | 0.5650407   | 0.44283097  | 0           | 0.3408881   | 1.3427560   | 0.293399    |         |
| 0.753885252 | 0.6318026   | 0.4173336   | 0.1019198   | 0.1845191   | 0.06003783  |             |         |
| 0.1209454   | 0           | 0.3628154   | 0.2294612   | 0.1154137   | 0.1807777   | 0.04023836  |         |
| 4.7148480   | 0.01942049  | 0.01980541  | 0.6721617   | 0.09558138  | 0.4821613   |             |         |
| 0.4107587   | 0.118761431 | 0.2113191   | 0.2094213   | 0.996205039 | 0.5878388   |             |         |
| 0.2301444   | 0.1013562   | 0.3823866   | 0.1134883   | 0.4058544   | 0.200211247 |             |         |
| 0.09172557  | 0.09003244  | 0.09324073  | 0.1362316   | 0.1377837   | 0.9405693   |             |         |
| 0.6952377   | 0.01868191  | 2.2964040   | 0.980550535 | 0.02661696  | 0.02295408  |             |         |
| 0.3396882   | 0.8477588   | 0.2249904   | 0.5623320   | 0.08808452  | 0.1452228   |             |         |
| 1.1167750   | 0.2596629   | 0.2751071   | 0.7460779   | 0.1942134   | 0           | 0.7974987   |         |

|             |             |             |             |             |             |
|-------------|-------------|-------------|-------------|-------------|-------------|
| 0.02566088  | 0.1074698   | 0.2310906   | 0.665419602 | 0.5165391   | 0.1528969   |
| 0.5903851   | 0.3372832   | 1.1109120   | 0.06209687  | 0.670721812 | 1.7434740   |
| 0.03992348  | 0.4846337   | 0.387741638 | 1.2087780   | 0.6691007   | 0.09741794  |
| 0.08800479  | 0.1067687   | 0.5332090   | 0.3458302   | 0.04579687  | 0.5132342   |
| 0.0891946   | 0.07172754  | 0.0405329   | 0.658260974 | 0.538000332 | 0.5262053   |
| 1.071618639 | 0.49604443  | 0.09455073  | 0.091405885 | 0.2241231   | 0.5249635   |
| 0.1001474   | 0.629047287 | 0.05387926  | 0.8578489   | 0.03071982  | 0.176326151 |
| 0.2852676   | 0.03284994  | 0.8467582   | 0.7107795   | 0.2703501   | 0.1558992   |
| 0.3763193   | 0.1147246   | 1.0219260   | 0.1458685   | 0.5386003   | 0.271769415 |
| 0.9406275   | 0.520686865 | 1.1430370   | 0.3274119   | 0.09475231  | 0.1213721   |
| 0.2090519   | 0.01642733  | 0.1456589   | 0.1509123   | 0.1261838   | 1.726793342 |
| 0.2088285   | 0.3046975   | 0.3354548   | 0.01591981  | 0.3012062   | 0.05028527  |
| 0.4103154   | 0.06141901  | 1.5118530   | 0.2921695   | 0.06426136  | 0.4117919   |
| 0.3975026   | 0.4393033   | 0.274012717 | 0.2972957   | 0.1897581   | 0.3076086   |
| 0.1744507   | 1.1066640   | 0.08473658  | 0.09438176  | 0.2754178   | 0.1925038   |
| 0.2803982   | 1.053336918 | 0.234048605 | 0.07789322  | 0.03449551  | 0.4179511   |
| 1.5535280   | 0.2771090   | 0.7323576   | 1.8836130   | 0.3871661   | 0.2106558   |
| 0.3775810   | 0.08053836  | 0.1101446   | 0.8520617   | 0.1825532   | 0.2493528   |
| 0.5151373   | 1.0830810   | 0.659891665 | 0.2762358   | 0.2740296   | 0.5071120   |
| 0.1172560   | 0.5398590   | 0.1620495   | 0.1157222   | 0.2146541   | 0.07110606  |
| 0.1329794   | 0.647344348 | 0.9541028   | 0.4026236   | 2.2480810   | 0.4788517   |
| 0.4039526   | 0.496669932 | 0.6109904   | 0.2474214   | 0.08881006  | 1.0299060   |
| 0.2498725   | 0.1674468   | 0.912818006 | 2.8954660   | 0.3165629   | 0.1061291   |
| 1.9508470   | 0.08733301  | 0.8115599   | 0.3869829   | 2.256656116 | 0.116259763 |
| 0.4884984   | 0.1797969   | 0.8370488   | 0.2029578   | 0.1876166   | 0.1428013   |
| 0.08402456  | 1.0210771   | 0.9731620   | 0.1786332   | 0.1230405   | 0.01675064  |
| 0.319624645 | 0.2877385   | 0.7923125   | 0.1700672   | 0.2517359   | 0.9612512   |
| 0.05604614  | 1.1403810   | 0.1159137   | 0.1448217   | 0.1139350   | 0.1214229   |
| 0.06667433  | 0.5272317   | 0.2628673   | 0.2408967   | 0.02503663  | 0.2190030   |
| 0.3899365   | 0.5843007   | 0.3089182   | 0.6330208   | 0.1762811   | 0.2275251   |
| 0.1110420   | 0.3241693   | 0.3011529   | 0.04981997  | 0           | 0.6025844   |
| 0.1496179   | 1.9005650   | 0.2872927   | 0.03848731  | 0.1313553   | 0.4292444   |
| 0           | 0.2463158   | 0.02014483  | 0           | 0.3101889   | 0.2259662   |
| 0.028428741 | 0.1474777   | 0.1356310   | 0.8888167   | 0.464636664 | 0.788356256 |
| 1.600648    | 0.858672566 | 0.04888295  | 0           | 4.6283150   | 0.1622410   |
| 0.2223762   | 0.2589574   | 0.04513172  | 0.6684419   | 0.06892645  | 0.221620338 |
| 0.07380041  | 0.1845511   | 0.0191520   | 0.3194849   | 0.2539641   | 0.3283330   |
| 0.3416072   | 0.4097717   | 0.1623063   |             |             |             |
| 0.1960361   | AC022973.4  | 0           | 0           | 0.1100370   | 0.0334820   |
| 0           | 0.06440711  | 0           | 0.058193964 | 0.1023367   | 0           |
| 0           | 0           | 0.03326232  | 0.10354     | 0.08610165  | 0.1230934   |
| 0.06717363  | 0.1064744   | 0.043986161 | 0.1200684   | 0           | 0           |
| 0.0834838   | 0.06351964  | 0.2453970   | 0           | 0           | 0           |
| 0.04272734  | 0           | 0           | 0.07762608  | 0.04436485  | 0           |
| 0.1131709   | 0           | 0.168295825 | 0           | 0.126033    |             |

|             |             |             |             |             |             |             |            |             |            |            |  |
|-------------|-------------|-------------|-------------|-------------|-------------|-------------|------------|-------------|------------|------------|--|
| 0.04738004  | 0.03269787  | 0.06809064  | 0.1028376   | 0.1834839   | 0.04630732  |             |            |             |            |            |  |
| 0.1033962   | 0           | 0.05035641  | 0.057906889 | 0           | 0.5734554   | 0.09301698  | 0          |             |            |            |  |
| 0.04874491  | 0           | 0.1948349   | 0.212965843 | 0.05882379  | 0           | 0.0482908   |            |             |            |            |  |
| 0.1084849   | 0           | 0           | 0.04842098  | 0.07849176  | 0           | 0.0269258   | 0          | 0           | 0          |            |  |
| 0.2787729   | 0           | 0           | 0.1183174   | 0.034478813 | 0           | 0           | 0.1352498  | 0.154929471 |            |            |  |
| 0.3778696   | 0           | 0.06614232  | 0.04696152  | 0.03259762  | 0           | 0.2890894   | 0          |             |            |            |  |
| 0.07215734  | 0.04148318  | 0.034914621 | 28.163980   | 0.042569937 | 0           | 0.2845902   | 0          |             |            |            |  |
| 0.06510093  | 0.03174124  | 0           | 0           | 0           | 0           | 0.05418132  | 0.07455927 | 0           |            |            |  |
| 0.04904136  | 0           | 0.2297540   | 0.04870344  | 0           | 0           | 0.131924751 | 0.03113025 |             |            |            |  |
| 0.2215739   | 0.07111529  | 0           | 0           | 0.08365409  | 0           | 0           | 0          | 0           | 0          | 0.03319699 |  |
| 0.05764647  | 0           | 0           | 0.0957438   | 0           | 16.601590   | 0           | 0.06674839 | 0.0325427   |            |            |  |
| 0           | 0.1030484   | 0.056608768 | 0           | 0           | 0.040241578 | 0           | 0          | 0.04831238  | 0          |            |  |
| 0.1622858   | 0           | 0           | 0.05465233  | 0           | 0.0555551   | 0.1298722   | 0          | 0           |            |            |  |
| 0.05288165  | 0           | 0.10802     | 0.058423595 | 0.06343613  | 0           | 0.1407962   | 0.04298855 |             |            |            |  |
| 0           | 0.1218368   | 0.2519180   | 0.05768486  | 0           | 0           | 0           | 0.04087645 | 0.04628683  |            |            |  |
| 0.1520497   | 0.03801354  | 0           | 0           | 0.1652273   | 0           | 0.1025889   | 0          | 0           |            |            |  |
| 0.08038464  | 0           | 0.03699883  | 0           | 0           | 0.09887127  | 0.06343302  | 0.1358854  | 0           |            |            |  |
| 0.05487385  | 0.1192282   | 0.04983331  | 0.2653439   | 0.08389664  | 0.6043461   |             |            |             |            |            |  |
| 0.04538556  | 0.04848331  | 0.5457379   | 0           | 0.3188659   | 0           | 0.1932039   | 0          | 0           |            |            |  |
| 0.4180346   | 0           | 0.047288861 | 0.04506851  | 0.108923716 | 0           | 0           | 0.0340973  | 0           |            |            |  |
| 0.2568206   | 0.03586858  | 0.1830362   | 0.060033957 | 0           | 0.07829118  | 0.0429378   |            |             |            |            |  |
| 0.1092903   | 0.06443248  | 0           | 0.2690643   | 0.3417786   | 0           | 0           | 0          | 0           |            |            |  |
| 0.07730328  | 0           | 0.06335341  | 0           | 0           | 0           | 0.2214368   | 0.1566049  | 0.0578581   |            |            |  |
| 0           | 0.05012226  | 0.040747154 | 0.1148540   | 0.1117207   | 0.02578995  | 0.0758833   |            |             |            |            |  |
| 0.03778232  | 0           | 0.05146862  | 0.04879326  | 0           | 0           | 0           | 0.04673441 | 0.07894725  |            |            |  |
| 0           | 0.115244799 | 0.09241879  | 0           | 0           | 0.1781863   | 0.2691337   | 0.05048813 | 0           |            |            |  |
| 0           | 0.1529313   | 0.05140556  | 0.044828846 | 0.111561498 | 0.07425709  | 0.08221307  |            |             |            |            |  |
| 0           | 0.4113911   | 0           | 0           | 0           | 0           | 1.0497520   | 0.0913188  | 0.1687290   | 0.06562683 |            |  |
| 0           | 0.07251311  | 0           | 0.03410349  | 0           | 0           | 0           | 0          | 0           | 0          | 0.0919032  |  |
| 2.1885360   | 0.2361159   | 0.05648897  | 0.1901577   | 0           | 0           | 0.07381322  | 0          |             |            |            |  |
| 0.04075879  | 0           | 0.030351597 | 0.05710479  | 0           | 0.3174912   | 0           | 0.03308447 |             |            |            |  |
| 0.06651261  | 0.041836865 | 0.0394329   | 0.1414619   | 0.04215619  | 0.0314152   |             |            |             |            |            |  |
| 0.068843636 | 0           | 0           | 0.05764347  | 0           | 0.13854081  | 0.02328474  | 0.06121565 | 0           |            |            |  |
| 0.0483709   | 0.09936583  | 0           | 0           | 0.04195741  | 0.03886473  | 0.1064340   | 0.02932422 |             |            |            |  |
| 0.07984352  | 0.038088033 | 0           | 18.515690   | 0.05553872  | 0.06755345  | 0.0428544   | 0          |             |            |            |  |
| 0.08904975  | 0           | 0.1381284   | 0           | 0           | 0.0413410   | 0.2224667   | 0          | 0.05711591  | 0          |            |  |
| 0.07176607  | 0           | 0.1423498   | 0.05162971  | 0.0557025   | 0           | 0           | 0          | 0.05044066  |            |            |  |
| 0.0383760   | 0           | 0           | 0.0717737   | 0           | 0.1114517   | 0.1709688   | 0.03962044 | 0           |            |            |  |
| 0           | 0           | 0           | 0           | 0.06017748  | 0.2643725   | 0.1263210   | 0.03453199 | 0.09602224  | 0          |            |  |
| 0.04620452  | 0           | 0           | 0.0622235   | 0.04393542  | 0.1385353   | 0           | 0.1008721  |             |            |            |  |
| 0.039548838 | 0           | 0.04828886  | 0.055310062 | 0.05825132  | 0.05096737  | 7.879037    |            |             |            |            |  |
| 0.1104767   | 0.03117581  | 0           | 0.03907773  | 0           | 0.1290748   | 0           | 0.2464084  | 0           |            |            |  |
| 0           | 0.04887112  | 0           | 0           | 0.2017574   | 0           | 0           | 0.7475398  | 0           | 0.3164926  |            |  |
| AC136604.2  | 0.2786572   | 0.5108946   | 0.07841394  | 0.305847426 | 0.143158542 |             |            |             |            |            |  |



|             |             |             |             |             |             |             |
|-------------|-------------|-------------|-------------|-------------|-------------|-------------|
| 0.2687973   | 1.1451490   | 0.6853439   | 0.4924828   | 0.5234534   | 0.2433640   | 0.141146457 |
| 0.5431197   | 0.442663333 | 0.691164324 | 0.4618685   | 0.2485723   | 0.2894892   |             |
| 0.1672595   | 0.3649264   | 0           | 0.2219832   | 0.2370321   | 0.1147753   | 0.1329408   |
| 0.2241685   | 0.3271042   | 0.3757819   | 0.2782090   | 0.062690348 | 0.2091527   |             |
| 0.246013067 | 0.2209331   | 0.4957647   | 0.1396827   | 0.090169363 | 0.2870269   |             |
| 0.2414134   | 0.1943038   | 0.2857681   | 0.03741613  | 0.02967001  | 0.2875749   |             |
| 0.3143240   | 0.1612530   | 0.5582156   | 0.1229086   | 0.09564513  | 0.06934909  | 0.2212698   |
| 0.0737684   | 0.05106367  | 0.1612944   | 0.039976679 | 0.1307055   | 0.1796259   |             |
| 0.1350548   | 0.06990291  | 0.2587860   | 0.4885568   | 0.1888658   | 0.1319970   | 0.07368165  |
| 0.5081796   | 0.04784627  | 0.275101905 | 0.01261922  | 0.4171662   | 0.1657131   |             |
| 0.056600915 | 0.1389453   | 0.1863072   | 0.2314036   | 0.113821902 | 0.2235663   |             |
| 0.1166974   | 0.1720636   | 0.1030772   | 0.3920806   | 0.1291190   | 0.2415384   |             |
| 0.1118687   | 0.1795424   | 0.04477134  | 0           | 0.02143996  | 0.1030670   | 0.1986576   |
| 0.04651304  | 0.05025906  | 0.1217879   | 0.139230566 | 0.1624613   | 0.162513    |             |
| 0.3641058   | 0.312814107 | 0.3291143   | 0.01262406  | 0.0628453   | 0.06693091  |             |
| 0.07743177  | 0.1219748   | 0.2197432   | 0.3507762   | 0.05999043  | 0.1478076   |             |
| 0.182458199 | 2.6859560   | 0.070783888 | 0.09930919  | 0.2974446   | 0.2409356   |             |
| 0.03092791  | 0.2412722   | 0.1167435   | 0.07107435  | 0.1719350   | 0.1463675   |             |
| 0.07594873  | 0.1415714   | 0.2833707   | 0.1144545   | 0.1863871   | 0.2292027   |             |
| 0.2319452   | 0.1388271   | 0.07400973  | 0.6028567   | 0.094011483 | 0.2588118   |             |
| 0.1228086   | 0.08446297  | 0.1453377   | 0.096998322 | 0.09935519  | 0.1575084   |             |
| 0.1346316   | 0.1804322   | 0.7590846   | 0.1540577   | 0.2996509   | 0.05477294  |             |
| 0.1732047   | 0.1851256   | 0.06822841  | 0.02277991  | 2.2386750   | 0.05497204  |             |
| 0.02242464  | 0.1585529   | 0.04638079  | 0.07961424  | 0.1835845   | 0.080680451 |             |
| 0.05127122  | 0.2489728   | 0.15294256  | 0.1610273   | 0.1954354   | 0.1606645   |             |
| 0.2273022   | 0.06424845  | 0.1608348   | 0.092736339 | 0.07789208  | 0.1146815   |             |
| 0.1979468   | 0.2005223   | 0.1337189   | 0.3071994   | 0.1507369   | 0.02115256  |             |
| 0.2480358   | 0.041633497 | 0.3616440   | 0.01299486  | 0.1086945   | 0.0510571   |             |
| 0.1723275   | 0.2315271   | 0.6582414   | 0.23294     | 0.1245308   | 0.0339234   |             |
| 0.1460107   | 0.7622127   | 0.03298466  | 0.09631364  | 0.2438010   | 0.1016907   |             |
| 0.06084122  | 0.3270649   | 0.062785013 | 0.3167940   | 0.4616461   | 0.03856514  |             |
| 0.2577746   | 0.1630519   | 0.1142522   | 0.094927947 | 0.1952352   | 0.1409142   |             |
| 0.1130082   | 0.04841696  | 0.329264834 | 0.1042771   | 0.1699274   | 0.2485836   |             |
| 0.1812093   | 0.2092509   | 0.2417773   | 0.05390401  | 0.09213309  | 0.2074137   |             |
| 0.2098447   | 0.2524761   | 0.3248535   | 0.2868331   | 0.248438272 | 0.078096143 |             |
| 0.4964958   | 0.156897194 | 0.14602781  | 0.1605823   | 0.038810307 | 0.1691754   |             |
| 0.6686876   | 0.1862864   | 0.065947932 | 0.3660281   | 0.07668141  | 0.1391299   |             |
| 0.099822485 | 0.08972047  | 0.1673743   | 0.2957816   | 0.1233129   | 0.1224414   |             |
| 0.09929057  | 0.3621738   | 0.1948451   | 0.1531421   | 0.06606375  | 0.2900407   |             |
| 0.120886243 | 0.05508744  | 0.168441936 | 0.3762213   | 0.2851627   | 0.1072831   |             |
| 0.2061350   | 0.1972488   | 0.1115989   | 0.3435877   | 0.1922290   | 0.07143569  | 0.193580068 |
| 0.1364110   | 0.1326897   | 0.07963927  | 0.1982770   | 0.1256464   | 0.1518278   | 0.3300955   |
| 0.2433955   | 0.1609378   | 0.6107233   | 0.3516724   | 0.03330361  | 0.1312709   |             |
| 0.0216261   | 0.146000193 | 0.1463533   | 0.02148533  | 0.16447     | 0.2327932   |             |

|             |             |             |             |             |             |
|-------------|-------------|-------------|-------------|-------------|-------------|
| 0.1534309   | 0.08394999  | 0.02137272  | 0.1230953   | 0.2179621   | 0.1343186   |
| 0.202322662 | 0.119250502 | 0.3351390   | 0.05858622  | 0.6861754   | 0.4777475   |
| 0.1810132   | 0.1451119   | 0.06770532  | 0.04383681  | 0.2276731   | 0.0433834   |
| 0.1469584   | 0.09118942  | 0.2805998   | 0.2307      | 0.2296617   | 0.09410977  |
| 0.1701185   | 0.06031066  | 0.137634951 | 0.3231931   | 0.08864844  | 0.1693085   |
| 0.04923532  | 0.06638147  | 0.1091526   | 0.3975406   | 0           | 0.2430417   |
| 0.2936032   | 0.06515151  | 0.7010335   | 0.2104015   | 0.0864937   | 0.125863    |
| 0.05444935  | 0.245128513 | 0.07460511  | 0.03890868  | 0.08379586  | 0.08135649  |
| 0.0943059   | 0.09479569  | 0.238508437 | 0.09366818  | 0.2800217   | 0.2002741   |
| 0.05223616  | 0.098117938 | 0.6756981   | 0.2693290   | 0.1506177   | 0.124977466 |
| 0.153574061 | 0.1050893   | 0.1235989   | 0.1102031   | 0.1378792   | 0.07080953  |
| 0.06063242  | 0.2616258   | 0.0697654   | 0.2123327   | 0.2528214   | 0.1044843   |
| 0.2086247   | 0.144757774 | 0.06916707  | 1.9140240   | 0.1846959   | 0.1765117   |
| 0.1628729   | 0.3426366   | 0.1480690   | 0.04966132  | 0.2624861   | 0.1503096   |
| 0.1842895   | 0.1374809   | 0.2113773   | 0.3636732   | 0.09497045  | 0.04529168  |
| 0.1789954   | 0.1133907   | 0.4057621   | 0.1226402   | 0.2513979   | 0.2669313   |
| 0.2389122   | 0.08870838  | 0.1677421   | 0.0729261   | 0.1516554   | 0.01298339  |
| 0.1835201   | 0.2045879   | 0.1692257   | 0.3044515   | 0.1462018   | 0           |
| 0.9991017   | 0.2513579   | 0.2832517   | 0.1022497   | 0.01429445  | 0.2302613   |
| 0.1300262   | 0.1722559   | 0.4105610   | 0.3541543   | 0.2853588   | 0.1869672   |
| 0.07390227  | 0.1043634   | 0.1425988   | 0.0322847   | 0.09584391  | 0.065760504 |
| 0.079343553 | 0.06882268  | 0.052552999 | 0.1106953   | 0.1937071   | 0.1871572   |
| 0.3673941   | 0.05924355  | 0.05518862  | 0.4455577   | 0.2199030   | 0.1992912   |
| 0.1938254   | 0.2829017   | 0.080655825 | 0.4038752   | 0.5223940   | 0.1595864   |
| 0.09865532  | 0.3035255   | 0.1858772   | 0.1315066   | 0.1886673   | 0.2564008   |
| 0.2088307   |             |             |             |             |             |
| AL353804.1  | 1.1818931   | 1.9571420   | 0.3798024   | 2.17530368  | 0.728066464 |
|             | 1.426468    |             |             |             |             |
| 1.5029483   | 3.3481192   | 4.4369445   | 0.0770920   | 0.6240428   | 0.950896371 |
|             | 1.1337651   | 1.223686059 |             |             |             |
| 1.325686889 | 0.3708854   | 1.0319780   | 0.3154855   | 0.3281030   | 0.5726836   |
|             | 0.209085734 |             |             |             |             |
| 0.2846087   | 0.9299436   | 0.1429510   | 0.5349375   | 0.6373017   | 0.7303457   |
| 1.0579450   | 0.4961329   | 0.273279876 | 0.4558693   | 0.48431898  | 0.07704735  |
| 0.9509008   | 0.05535503  | 0.285866507 | 0.9384061   | 0.5261849   | 0.9317104   |
| 0.6794840   | 0.2718408   | 0.08622505  | 0.4700988   | 0.3779867   | 0.7668375   |
| 0.3539453   | 0.1648564   | 0.1042341   | 0.8061512   | 0.16076     | 0.4134489   |
| 0.4451937   | 0.6445221   | 0.522799226 | 0           | 0.3480114   | 0.4415484   |
|             | 0.06771576  |             |             |             |             |
| 0.4935439   | 0.3194577   | 0.5699798   | 0.4315513   | 0.1605966   | 0.2840074   |
| 0.2085716   | 0.239844943 | 0.1650291   | 0.5566872   | 0.5779015   | 0.444122657 |
| 0.2523711   | 0.9281722   | 0.4438433   | 0.220521172 | 0.6091066   | 0.2260921   |
| 0.6000480   | 0.7301682   | 1.2472240   | 0.06253951  | 0.9526371   | 0.6502111   |
|             | 0.4695968   |             |             |             |             |
| 0.2230483   | 0           | 0.2492296   | 0.09627643  | 0.4536131   | 0.1013799   |
|             | 1.43973     |             |             |             |             |
| 0.2450298   | 0.464126101 | 0.1118213   | 0.2361423   | 0.3267787   | 0.48127758  |
| 0.5869128   | 0.1100617   | 0.2054665   | 0.4862756   | 0.4050489   | 0.122703    |
| 0.2993453   | 0.9556901   | 0.1867931   | 0.8590973   | 0.723065551 | 14.63578    |
| 0.396721605 | 0.1443029   | 0.3536239   | 0.1944975   | 0.2696420   | 0.9202849   |

|             |             |             |             |             |             |            |
|-------------|-------------|-------------|-------------|-------------|-------------|------------|
| 0.5089084   | 0.4131033   | 0.05353567  | 1.0482181   | 1.1173810   | 0.3366210   | 5.404307   |
| 0.1496791   | 0.5078119   | 0.7493557   | 0.8029291   | 0.7060379   | 0           | 0.9653783  |
| 0.204907512 | 0.1289386   | 0.8412604   | 0.4786485   | 0.4977944   | 0.084567052 |            |
| 0.4331093   | 0.2288703   | 0.08384087  | 0.3311749   | 0.1481643   | 0.298475    |            |
| 0.3781218   | 0.2984579   | 0.3145976   | 0.4272353   | 0.2974214   | 0.1324029   |            |
| 18.466720   | 3.834148    | 0.2443838   | 0.3455820   | 5.054581    | 0.09915844  | 0.6402256  |
| 0.175851183 | 1.9370140   | 4.4651382   | 0.458361392 | 0.4679669   | 0.6626220   | 7.503952   |
| 0.4246526   | 0.7281871   | 0.8012699   | 0.583925929 | 0.3961385   | 0.3888264   |            |
| 0.5752602   | 0.5379184   | 0.6314834   | 0.5356576   | 0.4015566   | 0.1383124   |            |
| 0.9321018   | 0.423473904 | 0.1313733   | 0.1699416   | 0.2186868   | 0.3115955   |            |
| 0.4245972   | 0.1682122   | 0.7390897   | 0.2986567   | 0.2923065   | 0.3943439   |            |
| 0.2545961   | 1.2909620   | 0.09585786  | 0.4198506   | 0.3936213   | 0.6965989   |            |
| 0.4773945   | 1.5968310   | 2.73692542  | 0.9560555   | 0.5450272   | 0.5603775   |            |
| 0.2080911   | 0.661640    | 7.729171    | 0.248286045 | 0.4728166   | 0.3583261   | 0.1313668  |
| 0.9849435   | 0.57413274  | 0.5113854   | 0.3086450   | 5.160124    | 0.5151703   |            |
| 1.0859130   | 5.928502    | 0.4229612   | 0.3263217   | 0.6216087   | 0.07036581  |            |
| 1.2106541   | 1.1682840   | 4.4501308   | 0.232069833 | 0.068087369 | 1.4428840   | 2.7357861  |
| 0.244832572 | 0.1866696   | 0.225575943 | 0.3687347   | 0.6477654   | 1.235744    |            |
| 0.919937101 | 0.5983465   | 0.5571162   | 0.4548714   | 0.12432753  | 0.3128877   |            |
| 0.9728243   | 0.4890721   | 0.7072971   | 2.0093      | 0.1923678   | 0.1857399   | 0.07078075 |
| 0           | 0.8999537   | 0.9401547   | 0.287436831 | 0.6403661   | 0.055516556 | 0.8200122  |
| 0.3729245   | 0           | 0           | 0.4585853   | 0.6081026   | 0.1198214   | 0.2327681  |
| 0.4671039   | 0.548505474 | 0.8325003   | 0.4048948   | 0.5608028   | 0.4714524   |            |
| 0.2738590   | 6.618478    | 0.2131782   | 0.4547186   | 0.5421147   | 0.4991749   |            |
| 0.3700372   | 0.2419620   | 0.1414088   | 1.034221991 | 0.7336809   | 0.5619533   |            |
| 0.1265220   | 3.690155    | 3.34418     | 0.5227928   | 0.09316798  | 0.2861851   | 0.3694992  |
| 0.3193756   | 0.41777304  | 0.635356336 | 0.9611437   | 0.3405189   | 0.5672922   |            |
| 1.4199530   | 2.630243    | 0.3614696   | 0.6394725   | 0.4777338   | 1.3705580   | 4.727925   |
| 0.6406214   | 0.2318826   | 0.3397753   | 0.3656973   | 0.9761132   | 0.2051217   |            |
| 0.6709540   | 0.428556088 | 0.7271555   | 0.1932182   | 0.7701391   | 0.05365667  |            |
| 0.1736221   | 0.1903272   | 1.7996120   | 4.283773    | 0.6927289   | 0.1754790   | 4.922598   |
| 0.177505361 | 0.6512673   | 0.4585913   | 0.5386336   | 0.2110239   | 0.2373557   |            |
| 0.754280928 | 0.4730454   | 0.1696108   | 0.9132077   | 0.2955411   | 0.5823894   |            |
| 0.2066168   | 0.433211001 | 0.3674866   | 0.8788832   | 0.4801693   | 0.1301188   |            |
| 0.35642991  | 0.1436831   | 0.2071870   | 2.387539    | 0.665869103 | 0.286911566 |            |
| 0.5786594   | 0.4437117   | 0.1441193   | 0.3005216   | 0.9774646   | 0.1762060   | 1.15552    |
| 0.4779052   | 0.3621917   | 0.5510498   | 0.9716656   | 0.4547186   | 0.591589074 |            |
| 0.1507566   | 12.692950   | 5.750905    | 0.5596002   | 1.1093680   | 3.514405    | 0.4149402  |
| 0.07216124  | 0.6436292   | 0.5360973   | 0.4016776   | 0.08561529  | 0.4936266   |            |
| 0.9688098   | 0.4139954   | 0.1974356   | 0.4830286   | 0.1235732   | 0.9826661   |            |
| 0.5613443   | 0.1153573   | 0.0802488   | 0.05785925  | 0.09667443  | 0.5223013   |            |
| 0.3576371   | 0.4206977   | 0.1131944   | 0.4000005   | 0.52024     | 1.5163610   | 8.655427   |
| 0.1770342   | 0.2461562   | 0.2459692   | 2.4121580   | 6.445411    | 1.1397710   | 3.24165    |
| 0.06231238  | 0.3650020   | 3.052057    | 0.2860565   | 1.0937170   | 2.756839    | 0.334906   |

|             |             |             |             |             |             |             |
|-------------|-------------|-------------|-------------|-------------|-------------|-------------|
| 1.1581971   | 1.192683396 | 0.3543704   | 0.0454941   | 0.5738003   | 0           | 0.3481691   |
| 0.286663308 | 0.475577514 | 0.2000080   | 0.916356509 | 0.6634967   | 0.1055510   |             |
| 0.4003863   | 0.2582546   | 0.7217351   | 0.2948510   | 0.1278135   | 0.4232374   | 0.3621104   |
| 0.8505005   | 0.507859467 | 0.3035471   | 1.4675420   | 0.2675652   | 0.1433528   |             |
| 0.9749370   | 0.4051382   | 0.3372140   | 0.6289238   | 0.1064479   | 0.9103353   |             |
| AC114271.1  | 0.2000165   | 0.09738087  | 0.4993194   | 0.078752264 | 0.111170239 |             |
| 0.1470224   | 0.2151457   | 0.1651674   | 0.08372317  | 0.05030307  | 0.210107    |             |
| 0.233165573 | 0.2993912   | 0.324468043 | 0.135254937 | 0.04247355  | 0.3143626   |             |
| 0.3136013   | 0.1285870   | 0.2091381   | 0.217969618 | 0.4289264   | 0.1325290   | 0.1432432   |
| 0.3859423   | 0.2384123   | 0.2509161   | 0.4705512   | 0.1590871   | 0.430839213 |             |
| 0.2325533   | 0.843051006 | 0.8338123   | 0.2979805   | 0.7366174   | 0.183328538 |             |
| 0.4155338   | 0.4323536   | 0.2308575   | 0.3631322   | 0.6537514   | 0.1244179   |             |
| 0.1884239   | 0.2272556   | 0.2049080   | 0.2979218   | 0.6805967   | 0.7018850   | 0.2154131   |
| 0.1288709   | 0.2504177   | 0.2988895   | 0.2254567   | 0.50989806  | 0.141177    |             |
| 0.4463651   | 0.5112766   | 0.13028     | 0.1695609   | 0.2134071   | 0.5076843   |             |
| 0.3228836   | 0.1459052   | 0.4189134   | 0.7858321   | 0.490283818 | 0.5732704   |             |
| 0.44031     | 0.3860552   | 0.308554466 | 0.3884343   | 0.3720278   | 0.3881460   | 0.371232851 |
| 0.3271485   | 0.4349842   | 0.3447307   | 0.2521415   | 0.2295879   | 0.3609639   |             |
| 0.4260461   | 0.3518317   | 0.3597145   | 0.2235043   | 0.265795939 | 0.2896973   |             |
| 0.2315357   | 0.3504093   | 0.9833630   | 0.5620153   | 0.2618993   | 0.211787915 |             |
| 0.4422235   | 0.4448551   | 0.6885735   | 0.450110593 | 0.5645880   | 0.4235008   |             |
| 0.4282439   | 0.14813     | 0.1407040   | 0.2754165   | 0.1631767   | 0.3907186   | 0.4552095   |
| 0.1446234   | 0.318799164 | 0.2954866   | 0.515908891 | 0.3933063   | 0.4157668   |             |
| 0.3180688   | 0.3674627   | 0.4479092   | 0.3161682   | 0.6126426   | 1.235983    |             |
| 0.3068878   | 0.2654021   | 0.6206487   | 0.1856693   | 0.3439657   | 0.3500887   |             |
| 0.5556567   | 0.1621060   | 0.2587359   | 0.43597     | 0.1891710   | 0.448980307 | 0.5374809   |
| 0.4475457   | 0.3187674   | 0.4063050   | 0.474543516 | 0.3402518   | 0.2385117   |             |
| 0.3763749   | 0.2654814   | 0.4355037   | 0.2512315   | 0.4023173   | 0.4880789   |             |
| 0.3278502   | 0.2892112   | 0.2145812   | 0.4988527   | 0.1684960   | 0.1536794   |             |
| 0.3447958   | 0.2770307   | 0.4754265   | 0.2464156   | 0.7270722   | 0.507486634 |             |
| 0.2030557   | 0.4474454   | 0.387480765 | 0.1950722   | 0.4704747   | 0.2406173   |             |
| 0.3858054   | 0.5298568   | 0.2408723   | 0.172835305 | 0.4990207   | 0.7569782   |             |
| 0.1567906   | 0.1886563   | 0.1557598   | 0.2862680   | 0.2019203   | 0.5395971   |             |
| 0.2988823   | 0.232780536 | 0.1369075   | 0.5630890   | 0.3213962   | 0.1926920   | 0.1361488   |
| 0.4921836   | 0.2509329   | 0.4979805   | 0.4217818   | 0.1106420   | 0.8299789   |             |
| 0.3257329   | 0.5609542   | 0.4711939   | 0.3092299   | 0.4264285   | 0.1615829   |             |
| 0.4754568   | 0.372982708 | 0.4257821   | 0.3428087   | 0.6109369   | 0.3536438   |             |
| 0.4883855   | 0.6879441   | 0.311821265 | 0.3638654   | 0.5170444   | 0.4422948   |             |
| 0.4511802   | 0.09204901  | 0.1503130   | 0.3760795   | 0.8355805   | 0.4570297   |             |
| 0.3203462   | 0.2323443   | 0.5952398   | 0.5875736   | 0.2989821   | 0.2481939   |             |
| 0.4146693   | 0.3292072   | 0.6575320   | 0.434082512 | 0.327487418 | 0.3122999   |             |
| 0.263172313 | 0.28262365  | 0.6135277   | 0.226037039 | 0.2438624   | 0.2596358   |             |
| 0.5434235   | 0.129054454 | 0.3837245   | 0.1012302   | 0.5712708   | 0.199330665 |             |
| 0.2382807   | 0.5978852   | 0.4134424   | 0.3719482   | 0.2246318   | 0.3701012   |             |

|             |             |             |             |             |             |
|-------------|-------------|-------------|-------------|-------------|-------------|
| 0.3573495   | 0.5617295   | 0.1427076   | 0.4501752   | 0.4054177   | 0.2150582   |
| 0.25667     | 0.198658791 | 0.3102695   | 0.1494747   | 0.2356513   | 0.6627099   |
| 0.1562377   | 0.2794865   | 0.2305274   | 0.4776834   | 0.2413103   | 0.372054973 |
| 0.4449077   | 0.7604398   | 0.6165385   | 1.5495250   | 0.3449836   | 0.4775045   |
| 0.2819704   | 0.1377070   | 0.2198455   | 0.5068645   | 0.4915663   | 0.3801719   |
| 0.3276606   | 0.5063338   | 0.452799125 | 0.3477724   | 0.1501605   | 0.2501803   |
| 0.2760948   | 0.4289301   | 0.2263081   | 0.3510277   | 0.2179453   | 0.3131295   |
| 0.5291137   | 0.520958047 | 0.36115705  | 0.3883253   | 0.3139177   | 0.2315149   |
| 0.5463765   | 0.3457933   | 0.3911852   | 0.7255597   | 0.3370121   | 0.2348918   |
| 0.6367319   | 0.1680692   | 0.2655504   | 0.4031162   | 0.1905513   | 0.1043316   |
| 0.4357469   | 0.1868357   | 0.3372080   | 0.309191106 | 0.6994962   | 0.3175256   |
| 0.1749217   | 0.6710041   | 0.2876420   | 0.6942073   | 0.3526435   | 0.2976154   |
| 0.3070570   | 0.3000964   | 0.5051044   | 0.37565763  | 0.3373432   | 0.2328278   |
| 0.3108871   | 0.6292908   | 0.3044363   | 0.196513912 | 0.1611642   | 0.1414046   |
| 0.3689580   | 0.3032527   | 0.2801183   | 0.4306414   | 0.152801975 | 0.6153663   |
| 0.1409088   | 0.3709235   | 0.1981849   | 0.171436071 | 0.1958085   | 0.575773    |
| 0.4210658   | 0.388206658 | 0.306664572 | 0.2473993   | 0.2591491   | 0.3234872   |
| 0.1927270   | 0.3794129   | 0.24013     | 0.8311352   | 0.3204156   | 0.5355264   |
| 0.194366    |             |             |             |             |             |
| 0.2969638   | 0.4573050   | 0.60702549  | 0.3142147   | 0.2988496   | 0.3688103   |
| 0.3756985   | 0.4624406   | 0.5071087   | 0.3843733   | 0.2487421   | 0.3095735   |
| 0.3056032   | 0.2962390   | 0.4186566   | 0.6384097   | 0.4800998   | 0.3698017   |
| 0.4024613   | 0.3395558   | 0.1882153   | 0.2993411   | 0.2957099   | 0.5548468   |
| 0.4181467   | 0.2226337   | 0.2247431   | 0.3182083   | 0.3695173   | 0.655221    |
| 0.3992588   | 0.4873948   | 0.2859721   | 0.3942384   | 0.3700531   | 0.1589469   |
| 0.4472757   | 0.4337906   | 0.2793081   | 0.3410133   | 0.5482082   | 0.4287725   |
| 0.2897205   | 1.3825280   | 0.3075771   | 0.6076795   | 0.6695273   | 0.7867528   |
| 0.3221669   | 0.7565163   | 0.528665439 | 0.2737458   | 0.5689270   | 0.3603166   |
| 0.5302472   | 0.4521495   | 0.347981974 | 0.221812193 | 0.4649670   | 0.183645923 |
| 0.2707765   | 0.6684462   | 0           | 0.4218381   | 0.2484312   | 0.4551403   |
| 0.2789619   |             |             |             |             |             |
| 0.3483635   | 0.4499951   | 0.1612669   | 0.3886210   | 0.294377673 | 0.8370693   |
| 0.1947201   | 0.2573876   | 0.6090583   | 0.2177158   | 0.4015376   | 0.2000388   |
| 0.4421161   | 0.6399928   | 0.2802266   |             |             |             |
| WASHC5-AS1  | 0.0252240   | 0.1459037   | 0.05391339  | 0.079911895 | 0           |
| 0.1237216   |             |             |             |             |             |
| 0.07915092  | 0.04457946  | 0.0219146   | 0           | 0.128927026 | 0.2049616   |
| 0           |             |             |             |             |             |
| 0.046297413 | 0.1221241   | 0.1189324   | 0.04847835  | 0.02800955  | 0.415556    |
| 0.267738972 | 0.3936036   | 0.1852377   | 0.1647468   | 0.1712499   | 0.4243611   |
| 0.1336034   | 0.3408658   | 0.08470791  | 0.104982303 | 0.2547277   | 0.345529591 |
| 0.1479913   | 0.3985036   | 0.17012     | 0.109817542 | 0.2746629   | 0.4548093   |
| 0.9761532   | 0.3480378   | 0.04177178  | 0.0993718   | 0.1203944   | 0.3267138   |
| 0.2454882   | 0.9857860   | 0.06333069  | 0.1201267   | 0.02580737  | 0.4940562   |
| 0.1411815   | 0.1924022   | 0.1800709   | 0.234309647 | 0.03979667  | 0.3342273   |
| 0.4146359   | 0.07804039  | 0.5417092   | 0.4090727   | 0.2919488   | 0.2578852   |
| 0.5346836   | 0.2618480   | 0.1602483   | 0.32248317  | 0           | 0.3421682   |
| 0.2590056   |             |             |             |             |             |
| 0.037913935 | 0.07756004  | 0.2674227   | 0.3410108   | 0.254144076 | 0.3041901   |

|             |             |             |             |             |             |
|-------------|-------------|-------------|-------------|-------------|-------------|
| 0.1302822   | 0.3457687   | 0.6904591   | 0.2484374   | 0.04804995  | 0.50079     |
| 0.06244574  | 0           | 0.1713710   | 0.04787161  | 0.4438229   | 0.1901002   |
| 0.2404705   | 0.1882597   | 0.137151665 | 0.1431897   | 0.1360735   | 0.5738707   |
| 0.246514694 | 0.2505183   | 0           | 0.1578627   | 0.5604181   | 0.2852708   |
| 0.09199641  | 0.4405617   | 0.2296251   | 0.1980168   | 0.388878696 | 10.49521    |
| 0.033867394 | 0.05543494  | 0.1811293   | 0.02988702  | 0.3107544   | 0.3787861   |
| 0.1466254   | 0.0793482   | 0           | 0.1750782   | 0.1907775   | 0.08621015  |
| 0.2300009   | 0.4291746   | 0.4797834   | 0.4341157   | 0.1549881   | 0           |
| 0.314866399 | 0.1981305   | 0.1762777   | 0.1697317   | 0.2433850   | 0.064974004 |
| 0.2662110   | 0.04396104  | 0           | 0.3180576   | 0           | 0.1719918   |
| 0.09668381  | 0.1458892   | 0.6093677   | 0.07629523  | 4.9601120   | 0.1472914   |
| 0.1126580   | 0.05310307  | 0.1294501   | 0           | 0.2459470   | 0.225181384 |
| 0.160075103 | 0.3954998   | 0           | 0.1537437   | 0.07250363  | 0.1721465   |
| 0.241574388 | 0.04347979  | 0.08535444  | 0.4419801   | 0.3099674   | 0.1866066   |
| 0.4801451   | 0.2103555   | 0.03542243  | 0.2005210   | 0.278880599 | 0.4542113   |
| 0.2176141   | 0.1400167   | 0.2736034   | 0.2509413   | 0.1615496   | 0.4342402   |
| 0.3671391   | 0.03208329  | 0.4165971   | 0.09780479  | 0.2276407   | 0.1472978   |
| 0.2822548   | 0.1512123   | 0.09731024  | 0.08150858  | 0.2190834   | 0.035046944 |
| 0.2448501   | 0.1610584   | 0.1722182   | 0.4156858   | 0.3120564   | 0.2649167   |
| 0.222555095 | 0.07265427  | 0.1573182   | 0.1009309   | 0.1621597   | 0.220556955 |
| 0.08731206  | 0.1422817   | 0.1982296   | 0.3694248   | 0.3337286   | 0.4301895   |
| 0.03610742  | 0.1542876   | 0.5644250   | 0.1081260   | 0.3382405   | 0.1904018   |
| 0.475473003 | 0.23540599  | 0.1662880   | 0.140129418 | 0           | 0.07171037  |
| 0.03541298  | 0.2986121   | 0.2441413   | 0.265050021 | 0.5107974   | 0.3138959   |
| 0.1164946   | 0.095522514 | 0.1802969   | 0.1868585   | 0.2049603   | 0.2173703   |
| 0.4613453   | 0.2586479   | 0.4281193   | 0.6525817   | 0           | 0.2489208   |
| 0.257648517 | 0.1230005   | 0.07051892  | 0.2268095   | 0.09550764  | 0.1283272   |
| 0.5285059   | 0.2180329   | 0.2301511   | 0.1430711   | 0.6778886   | 0.064834483 |
| 0.1218326   | 0.3555270   | 0.2256950   | 0.3622232   | 0.09017551  | 0           |
| 0.4270034   | 0.02450083  | 0.2556819   | 0.08122987  | 0.07436105  | 0           |
| 0.611235904 | 0.3431199   | 0.1439188   | 0.3888341   | 0.1417598   | 0.2569379   |
| 0.2811681   | 0.1431644   | 0.4947298   | 0.3650029   | 0.4498644   | 0.285316133 |
| 0.044377529 | 0.1476919   | 0.06540631  | 0.07924695  | 0.6545814   | 0.3637533   |
| 0.0694305   | 0.1511739   | 0.1101148   | 0.5446645   | 0.2179517   | 0.2237264   |
| 0.07635366  | 0.2610539   | 0.4916978   | 0.4230549   | 0           | 0.3527126   |
| 0.230485787 | 0.3142594   | 0.2226782   | 0.07396353  | 0.04122514  | 0.04446541  |
| 0.03655775  | 1.9971850   | 0.05485467  | 0.8766190   | 0.7190555   | 0.3025678   |
| 0           | 0.4697891   | 0.1241518   | 0.4215445   | 0.3647272   | 0.265615253 |
| 0.2085028   | 0.1683911   | 0.04541365  | 0.1316052   | 0.2116619   | 0.399410211 |
| 0.1568583   | 1.0504010   | 0.1006147   | 0.1499581   | 0.219079917 | 0.2207874   |
| 0.05306151  | 0.09171891  | 0           | 0.183698348 | 0.1667219   | 0.2191562   |
| 0.1539299   | 0.2766839   | 0.1353814   | 0.2389761   | 0.06676018  | 0.1545982   |
| 0.0846758   | 0.06998848  | 0.3811270   | 0.030301723 | 0.1544378   | 6.1377260   |
| 0.1612306   | 0.1704685   | 0.4725288   | 0.2833815   | 0.1386061   | 0.2197818   |

|                           |                             |                     |                    |                            |                       |
|---------------------------|-----------------------------|---------------------|--------------------|----------------------------|-----------------------|
| 0.2745938                 | 0.1851686                   | 0.3617866           | 0.12642            | 0.06766814                 | 0.3635180.04334068    |
| 0.3996649                 | 0.1424145                   | 0.3397480.2464505   | 0.1772611          | 0.1233125                  |                       |
| 0.1778162                 | 0.1114144                   | 0.2006456           | 0.2747774          | 0.3232277                  | 0.0869688             |
| 0.2458606                 | 0.2284042                   | 0.2519006           | 0.1773355          | 0.4624604                  | 0.1891251             |
| 0.08099204                | 0.4118431                   | 0.1980838           | 0.07297509         | 0.3735905                  | 0.04787544            |
| 0.4557085                 | 0.06699818                  | 0.1648358           | 0.6875323          | 0.2118117                  | 0.3308307             |
| 0.3954927                 | 0.215612872                 | 0.1485096           | 0.06990746         | 0.4408585                  | 0 0.1337515           |
| 0.18878338                | 0.066435019                 | 0.0768344           | 0.132009195        | 0.1390291                  | 0.4865777 0           |
| 0.3295952                 | 0.1240128                   | 0.1478716           | 0.3108910.04910043 | 0.1198028                  |                       |
| 0.2473016                 | 0.1960353                   | 0.120060081         | 0.1399316          | 0.5054456                  | 0.2466887             |
| 0.2753497                 | 0.4012806                   | 0.3112731           | 0.3627205          | 0.6318908                  | 0.2044633             |
| 0.5595383                 |                             |                     |                    |                            |                       |
| PABPC4-AS1                | 0.3224644                   | 0                   | 0.1865237          | 0.057435862                | 0.141888331 0.4169933 |
| 0.08787005                | 0                           | 0                   | 0.1634248          | 0.3064718                  | 0.091567047 0.6550589 |
| 0.038523134               | 0.049322289                 | 0.7372514           | 0.3378745          | 0                          | 0.02983957 0.2864573  |
| 0.11409276                | 0.2329556                   | 0.8457442           | 0.4972802          | 2.2257510.1391037          |                       |
| 0.2561985                 | 1.4525460.4963330.037280467 | 0.1017639           | 0.537999655        | 0                          |                       |
| 0.3184051                 | 0.1359262                   | 0.058496277         | 0.4389123          | 0.8613771                  | 0.6239585             |
| 0.3707771                 | 0.08900195                  | 0.1411524           | 1.4108650.5800998  | 0.3661383                  |                       |
| 0.7604847                 | 0                           | 0.04265842          | 0.1924546          | 0.9210876                  | 0.2632099 0.2505225   |
| 0.04795899                | 0.356597778                 | 0.2119841           | 0.9613735          | 0.3614125                  | 0.2494177             |
| 0.4328266                 | 0.08715996                  | 0.5702097           | 0.1177433          | 0.1752669                  | 0.1859707             |
| 0.1280387                 | 1.177895489                 | 0.0900522           | 1.5492270.5124375  | 0.282737493                |                       |
| 0.4131374                 | 0.2848950.5944762           | 0.406123156         | 0.4985610.04626477 | 0.286502                   |                       |
| 1.0573831.2855370.2047573 | 0.5745487                   | 0.06652568          | 0                  | 0.1369258                  | 0                     |
| 0.2039973                 | 0.0525356                   | 1.1138630           | 0.07685453         | 0.06685325                 | 0.292225145           |
| 0.1525451                 | 0.09664265                  | 1.5284130.131310459 | 0.7472812          | 0                          | 0.1681768             |
| 0.07960446                | 0.1381405                   | 0.1673897           | 0.5880424          | 0.5866827                  | 0.06115695            |
| 0.07031813                | 0.207143189                 | 16.238960.108240438 | 0                  | 0.9648177                  | 0.2547176             |
| 0.2207052                 | 0.08070686                  | 0.3124107           | 0.5494611          | 0                          | 1.1564060.03387368    |
| 0.2296069                 | 0.3791562                   | 0.3675423           | 0.74817            | 0.5878                     | 0.8519349 0.04127859  |
| 0                         | 0.6584779                   | 0.279532027         | 0.07915332         | 0.1877950                  | 0.7037783 0.207657388 |
| 0.07090102                | 0.4214994                   | 0.4803732           | 0.5082572          | 0.08084949                 | 1.465832              |
| 0.5064498                 | 0                           | 0.2832520.1165657   | 0.08114765         | 0.1354667                  | 8.602162              |
| 0.03922869                | 0.04000621                  | 0.1131452           | 0.08274468         | 0.04058118                 | 0.1310081             |
| 0.143936267               | 0.06097956                  | 0.3807211           | 0.068213492        | 0.2681255                  | 0.1549611             |
| 0.2456829                 | 0.4248239                   | 0.1833938           | 0.1639622          | 0.330888642                | 0.2316029             |
| 0.1363967                 | 0.09417145                  | 0.1651097           | 0.1987987          | 1.1326420.5677180.03773678 |                       |
| 0.3356920.148550737       | 0.2150611                   | 0.2318321           | 0.1789977          | 0.1093048                  |                       |
| 0.5079399                 | 0.1032628                   | 1.6725190.5377988   | 0.2392564          | 0.5245096                  |                       |
| 0.3473165                 | 0.3118035                   | 0.0392304           | 0.1288697          | 0.2899653                  | 0.2073362 0           |
| 1.4470640.112010287       | 0.7825427                   | 0.03431625          | 0.1834702          | 0.34065                    | 0.08311121            |
| 0.2508668                 | 0                           | 0.07740119          | 0.1675967          | 0.2419319                  | 0.3455091 0.078322403 |
| 0.2325416                 | 0.9599924                   | 0.8024882           | 0.3092268          | 1.1021520.5930893          |                       |

|             |             |             |             |             |             |            |           |
|-------------|-------------|-------------|-------------|-------------|-------------|------------|-----------|
| 0.03846653  | 0.2670982   | 0.6013021   | 1.09431     | 0.9909342   | 0.5505707   |            |           |
| 0.5731248   | 0.379903792 | 0.278651575 | 1.5943730   | 0.11196366  | 0.04007967  |            |           |
| 0.07639562  | 0.138477428 | 0.6413542   | 0.2651018   | 0.5201851   | 0.270652687 |            |           |
| 0.3265024   | 1.1248150   | 0.1551323   | 0.2035271   | 0.2561023   | 0.3317784   |            |           |
| 0.07278386  | 0.2084151   | 0.5460974   | 0.1574553   | 0.3040605   | 1.274567    |            |           |
| 0.06071331  | 0.1767895   | 0.5307088   | 0.392117395 | 0.06551839  | 0.187815816 |            |           |
| 0.4832566   | 0.8902924   | 0.4648194   | 0.1471004   | 0.4691969   | 0.7963826   |            |           |
| 0.2942258   | 0.03810468  | 0.7221790   | 0.138140985 | 0.0795921   | 0.0889220   | 0.5245985  |           |
| 0.1607872   | 0.3202240   | 0.1354326   | 0.08724444  | 0.1654189   | 0.07830482  |            |           |
| 0.5901719   | 0.08653708  | 0.07921949  | 0           | 0.0385816   | 0.455820023 | 0.339428   |           |
| 0.07666091  | 0.1380796   | 0.2013624   | 0.6386919   | 0.3423296   | 0.2669068   |            |           |
| 0.1756844   | 0.3024394   | 1.3070630   | 0.379946846 | 0.094553937 | 0.3461513   |            |           |
| 0.6271171   | 0           | 0.5811241   | 0.08611541  | 0.1849170   | 0.06039413  | 0.1173092  |           |
| 0.6576173   | 0           | 0.6196937   | 0.3524832   | 0.4171651   | 0.5986552   | 1.270142   |           |
| 0.04197364  | 0.4335661   | 0.1075960   | 0.666478606 | 0.3347918   | 0.2372271   |            |           |
| 0.05253066  | 0           | 0.04737059  | 0           | 3.0551190   | 0.3668867   | 0.3351405  | 2.17577   |
| 0.029058046 | 0.08201076  | 0.1251208   | 0.3527024   | 0.1036353   | 0.03885569  |            |           |
| 0.154346959 | 0.1451975   | 0.08329706  | 1.9733240   | 0.3925704   | 0.3382365   |            |           |
| 0.070917663 | 0.2673708   | 2.7975750   | 0.2501063   | 0.4526412   | 0.233393669 |            |           |
| 0.5292286   | 0.05652833  | 0.1465671   | 0.099094857 | 0.156560334 | 0.3552296   |            |           |
| 0.2075333   | 0           | 0.4509642   | 0.0842175   | 0           | 0.2970215   | 0.0355610  | 0.2305786 |
| 0.1804163   | 0.04970749  | 1.5226060   | 0.161407545 | 0           | 11.769730   | 0.5177902  |           |
| 1.5172550   | 0.1452850   | 0.5034018   | 0.9056893   | 0.05906482  | 0.3512121   | 0.9263597  |           |
| 0.2301445   | 0           | 0.7003346   | 0.2162679   | 0.3388601   | 0.04617238  | 0.7603166  |           |
| 0           | 0.4825943   | 0.2187938   | 0.2360533   | 0.4926344   | 0.09471696  | 0.2769521  |           |
| 0.1282529   | 0.1626279   | 0.3935383   | 0           | 0.2619241   | 0.4562384   | 0.8386211  |           |
| 0.5195351   | 0.1159237   | 0.06716059  | 0.2300899   | 0           | 0.6858338   | 1.243888   |           |
| 0.09949984  | 0           | 0.5975169   | 0           | 0.1756055   | 0.2034591   | 0.1805205  |           |
| 0.8223734   | 0.3511104   | 0.114850051 | 0.1318438   | 0.03723746  | 0.3913853   | 0          |           |
| 0.05699611  | 0.067039228 | 0           | 0           | 2.765804258 | 0.1974836   | 0.08639477 | 0         |
| 0.8193023   | 0.2113844   | 0.3150659   | 0.4968049   | 0.05230844  | 0.07293154  |            |           |
| 0.1975944   | 0.2784579   | 0.031976074 | 0           | 1.15978     | 0.1752042   | 0          | 1.082997  |
| 0.1205856   | 0.3588178   | 0.6731759   | 0.04356442  | 1.043168    |             |            |           |
| LINC01409   | 0.07246242  | 0.01103387  | 0.06209567  | 0.011472597 | 0.065185819 |            |           |
| 0.02082321  | 0.06143099  | 0.05895072  | 0.01897273  | 0.006995034 | 0.1020277   |            |           |
| 0.073160693 | 0.1144899   | 0.084643362 | 0.029555825 | 0.03031889  | 0.06327108  |            |           |
| 0.07221226  | 0.0208612   | 0.1976648   | 0.148132398 | 0.1628620   | 0.2280612   |            |           |
| 0.1080942   | 0.1639864   | 0.1319809   | 0.2871469   | 0.4101026   | 0.07210229  |            |           |
| 0.029786532 | 0.1727792   | 0.435509599 | 0.0409397   | 0.05653353  | 0.1357538   |            |           |
| 0.108080805 | 0.2484014   | 0.1290426   | 0.2215704   | 0.1296073   | 0.04888896  |            |           |
| 0.03524334  | 0.4227225   | 0.2935443   | 0.06268692  | 0.1916883   | 0.04042971  |            |           |
| 0.1618963   | 0.1290555   | 0.1051336   | 0.04506445  | 0.04549174  | 0.0670574   |            |           |
| 0.089036331 | 0.03810872  | 0.2098114   | 0.2085512   | 0.1079439   | 0.2478391   |            |           |
| 0.03917222  | 0.1553144   | 0.06663654  | 0.05688948  | 0.09751074  | 0.2173896   |            |           |



|                    |                   |                    |             |                     |             |
|--------------------|-------------------|--------------------|-------------|---------------------|-------------|
| 0.171558475        | 0.03597518        | 0.3337231          | 0.09842064  | 0.10891752          | 0.1939282   |
| 0.06639115         | 0.2012058         | 0.130695868        | 0.2340263   | 0.1478594           | 0.3515416   |
| 0.2479402          | 0.4267098         | 0.1073612          | 0.1311588   | 0.1063060.02132682  |             |
| 0.07977202         | 0.010424896       | 0.05602809         | 0.1101848   | 0.1719241           | 0.04143766  |
| 0.1483969          | 0.1702595         | 0.265587475        | 0.05789359  | 0.08445502          | 0.1946253   |
| 0.085243503        | 0.3838284         | 0.05848212         | 0.07278413  | 0.1470814           | 0.03311166  |
| 0.2541095          | 0.1761889         | 0.08593762         | 0.06718729  | 0.1580150.100484749 | 3.52727     |
| 0.104499665        | 0.04718551        | 0.2312624          | 0.07313841  | 0.06061691          | 0.1773298   |
| 0.1352062          | 0.05487639        | 0.08315156         | 0.2980486   | 0.1217905           | 0.353146    |
| 0.08204628         | 0.06933656        | 0.1411417          | 0.1735638   | 0.5810117           | 0.08245244  |
| 0.07912079         | 0.07453281        | 0.156339319        | 0.0711476   | 0.09377835          | 0.1234044   |
| 0.08508612         | 0.096783825       | 0.1416221          | 0.1870954   | 0.1713442           | 0.1252111   |
| 0.01211204         | 0.1951962         | 0.2304233          | 0.2293424   | 0.1285875           | 0.1901491   |
| 0.03647011         | 0.05952973        | 1.7059760.01958946 | 0.1158708   | 0.1130016           |             |
| 0.1432421          | 0.04458266        | 0.05669813         | 0.091043972 | 0.1035337           | 0.1309709   |
| 0.088565025        | 0.03060404        | 0.1702409          | 0.09814848  | 0.09642838          | 0.2243723   |
| 0.1228156          | 0.11015627        | 0.09252362         | 0.1362236   | 0.2351299           | 0.1841386   |
| 0.2541395          | 0.2371881         | 0.2193386          | 0.01884445  | 0.09448407          | 0.103853578 |
| 0.08591531         | 0.09261516        | 0.3188075          | 0.03274984  | 0.2109281           | 0.09969401  |
| 0.3660657          | 0.3466842         | 0.0921675          | 0.1732715   | 0.09365646          | 0.08650219  |
| 0.1723947          | 0.1072552         | 0.05148399         | 0.1449512   | 0.04769811          | 0.2470873   |
| 0.041018328        | 0.3343296         | 0.2090635          | 0.08245685  | 0.08505443          | 0.1494104   |
| 0.09708755         | 0.057507374       | 0.1855272          | 0.1590148   | 0.04832499          | 0.05751178  |
| 0.109512239        | 0.09057617        | 0.1867087          | 0.2784054   | 0.6401297           | 0.3337769   |
| 0.1777010.06531012 | 0.08413177        | 0.3418454          | 0.01725665  | 0.4363575           |             |
| 0.1794320.1022139  | 0.063236961       | 0.072357485        | 0.4423196   | 0.07827512          |             |
| 0.036025935        | 0.1106331         | 0.069150864        | 0.1808585   | 0.1270874           | 0.404075    |
| 0.084602698        | 0.3369578         | 0.1032303          | 0.1983174   | 0.167696812         | 0.1214942   |
| 0.1789330.1090373  | 0.2960366         | 0.1799835          | 0.2358833   | 0.08351056          |             |
| 0.2430178          | 0.0424454         | 0.1265384          | 0.09805655  | 0.148815552         | 0.1046964   |
| 0.146310461        | 0.1233422         | 0.2565870.0436922  | 0.1028396   | 0.1265224           |             |
| 0.4871655          | 0.3330328         | 0.08752956         | 0.09758259  | 0.165558853         | 0.1912012   |
| 0.3168054          | 0.07858994        | 0.1862765          | 0.1151344   | 0.04395973          | 0.1611974   |
| 0.2271624          | 0.02867534        | 0.5531509          | 0.06914182  | 0.1265904           | 0.03341342  |
| 0.04238591         | 0.263389827       | 0.1929677          | 0.1148455   | 0.1723805           | 0.0980396   |
| 0.5376430.06410537 | 0.2208708         | 0.04094102         | 0.1941787   | 0.1522973           |             |
| 0.136607316        | 0.089712269       | 0.1508562          | 0.2366103   | 0.2318731           | 0.2708472   |
| 0.1548111          | 0.0627920.1025398 | 0.06248554         | 0.1699909   | 0.1082187           |             |
| 0.1380640.1462303  | 0.3333086         | 0.2092635          | 0.2046017   | 0.02096019          |             |
| 0.2338287          | 0.07880359        | 0.108603275        | 0.7170314   | 0.09477044          | 0.1023048   |
| 0.08772579         | 0.05677258        | 0.1594771          | 0.4031999   | 0.04085515          | 0.1665551   |
| 0.09085129         | 0.5714211         | 0.078357179        | 0.07371604  | 0.2124355           | 0.07485415  |
| 0.03105115         | 0.04268703        | 0.105336601        | 0.09425861  | 0.02495741          | 0.3822197   |
| 0.05315133         | 0.0168031         | 0.09571209         | 0.063744914 | 0.1134884           | 0.3113342   |

|             |             |             |             |             |             |
|-------------|-------------|-------------|-------------|-------------|-------------|
| 0.1355997   | 0.09041337  | 0.049533227 | 0.1174571   | 0.1693698   | 0.1171049   |
| 0.11876295  | 0.042999465 | 0.05321684  | 0.07254448  | 0.07068822  | 0.1678734   |
| 0.07990511  | 0.0432131   | 0.1949379   | 0.02486112  | 0.1217226   | 0.1441499   |
| 0.07446662  | 0.1284125   | 0.10961787  | 0.05751177  | 1.6616350   | 0.1598412   |
| 0.1887015   | 0.1233355   | 0.1939229   | 0.1055297   | 0.04424241  | 0.2572287   |
| 0.4236370   | 0.1214935   | 0.09098467  | 0.3873855   | 0.0431987   | 0.25624     |
| 0.03458535  |             |             |             |             |             |
| 0.5285089   | 0.07071247  | 0.3052552   | 0.1158136   | 0.3489156   | 0.4887293   |
| 0.1655444   | 0.1580575   | 0.08112379  | 0.2663713   | 0.2505624   | 0.03701337  |
| 0.03923876  | 0.1518865   | 0.1641612   | 0.1933992   | 0.1823481   | 0.02683015  |
| 0.04595959  | 0.07668403  | 0.2529096   | 0.5823325   | 0.09274869  | 0.03056322  |
| 0.2498928   | 0.07484924  | 0.09353743  | 0.6421150   | 0.3200172   | 0.3207098   |
| 0.1087061   | 0.108969112 | 0.1106083   | 0.2008271   | 0.1250844   | 0.07478089  |
| 0.11110014  | 0.06360646  | 0.091891541 | 0.07357552  | 0.149819389 | 0.09368568  |
| 0.3580834   | 0.2000821   | 0.2080725   | 0.05541801  | 0.09833317  | 0.1653915   |
| 0.07313891  | 0.06737608  | 0.1019609   | 0.1286234   | 0.11177426  | 0.1240708   |
| 0.3888607   | 0.06999277  | 0.1171871   | 0.2533273   | 0.1505408   | 0.1488583   |
| 0.2451997   | 0.06526372  | 0.3869709   |             |             |             |
| H1FX-AS1    | 0.3723269   | 0.2491912   | 0.2654508   | 0.148056889 | 0.233169824 |
| 0.5979220   | 0.6087442   | 0.9713461   | 0.2678026   | 0.1767841   | 0.2715681   |
| 0.501583934 | 0.4617255   | 0.645476506 | 0.476782127 | 0.5589618   | 0.8777697   |
| 2.4046820   | 0.2980642   | 1.1244170   | 0.726073647 | 0.3678109   | 0.7494233   |
| 0.06126622  |             |             |             |             |             |
| 0.7818508   | 0.7619792   | 1.7703      | 0.5130467   | 0.4725191   | 0.504528988 |
| 0.8470905   | 0.506380377 | 2.3876790   | 0.4445878   | 0.7883721   | 0.603161612 |
| 1.2021321   | 1.7780860   | 0.6925169   | 0.7168357   | 0.7814866   | 0.3524892   |
| 2.242064    |             |             |             |             |             |
| 1.7695190   | 0.2443828   | 1.2018880   | 0.6304552   | 2.7559710   | 0.6289904   |
| 0.58299     |             |             |             |             |             |
| 0.2847263   | 0.4219658   | 0.3245225   | 0.511321592 | 1.2841520   | 0.6597079   |
| 2.2126480   | 0.1205519   | 0.7903094   | 0.6951007   | 1.0105380   | 0.3224858   |
| 0.3176713   |             |             |             |             |             |
| 0.8314441   | 0.7426245   | 0.624666335 | 0.7399289   | 0.5677124   | 0.6985793   |
| 0.331879962 | 0.5857370   | 0.2447986   | 2.0166320   | 0.327154765 | 1.3775521   |
| 1.42367     |             |             |             |             |             |
| 0.3297047   | 0.4221871   | 1.2365940   | 0.9814131   | 0.7537532   | 0.9431863   |
| 0.2958704   |             |             |             |             |             |
| 0.3713478   | 0.092493519 | 0.3779618   | 0.5332363   | 0.1522655   | 1.891727    |
| 2.5878632   | 0.4395870   | 0.546136327 | 0.4423808   | 0.2958339   | 1.7606461   |
| 1.375112305 |             |             |             |             |             |
| 1.54794     | 0.9724369   | 0.4335223   | 4.5401080   | 0.9436533   | 0.8144439   |
| 3.821187    |             |             |             |             |             |
| 1.7580930   | 0.4581675   | 0.9573032   | 0.371871344 | 0.7291262   | 0.418529693 |
| 1.5318680   | 0.6839485   | 1.0002971   | 0.1013404   | 2.6569      | 1.4596520   |
| 0.3813354   |             |             |             |             |             |
| 0.5469094   | 0.3383605   | 1.5388761   | 0.8529510   | 0.3684498   | 1.3058341   |
| 1.651093    |             |             |             |             |             |
| 1.2588350   | 0.2660176   | 0.7840395   | 0.7921245   | 0.972771453 | 1.2029840   |
| 0.6051171   |             |             |             |             |             |
| 0.2233478   | 0.9190274   | 1.695099568 | 0.5083209   | 0.5055391   | 1.6363190   |
| 0.46402     |             |             |             |             |             |
| 0.4103112   | 1.8696142   | 2.2891850   | 0.6218570   | 0.3941208   | 0.6635611   |
| 0.6013942   |             |             |             |             |             |
| 0.4670591   | 1.4156022   | 0.4332680   | 0.7476716   | 0.8658751   | 2.220160    |
| 0.8826406   |             |             |             |             |             |
| 0.7246686   | 0.525633925 | 0.4715753   | 1.44486     | 0.131879418 | 1.29594     |
| 0.8363596   |             |             |             |             |             |
| 1.8339780   | 0.4542183   | 2.3563550   | 0.4358662   | 0.231009293 | 1.0746370   |
| 0.4541505   |             |             |             |             |             |
| 1.6537551   | 0.86207     | 0.3651269   | 0.6121951   | 0.5632360   | 0.8876529   |
| 0.3392524   |             |             |             |             |             |
| 0.231354018 | 1.0827731   | 0.3894471   | 1.3409910   | 0.07044088  | 0.9690958   |
| 1.053663    |             |             |             |             |             |

1.1294441.1894050.3469217 0.5135263 1.2198530.3739717 0.5372385  
0.3737223 0.4412127 2.6723331.0562392.5419560.252645425 2.899755  
2.9744560.5542331.5861040.8167985 0.7780356 0.267391487 1.558774  
5.2113250.3811174 0.3247146 0.630930472 0.2247903 2.7269961.190827  
1.4991251.0711420.7904862 0.1921189 0.1919911 1.3115580.7237803  
0.4716947 0.7376359 1.2597380.550860499 0.457917421 6.1078280.258553118  
0.445552328 1.6862210.364400787 0.7840869 0.8627591.28505 0.454925036  
1.3852170.7640637 2.4943551.082085746 1.0418382.2557251.04364 0.6230584  
1.3021390.2536781.3961450.7093804 0.6358033 0.5364251 0.5856961  
1.244537043 1.2878 0.683858254 1.5485091.0368370.5462388 3.34163  
0.2041006 1.6786711.0191651.3997120.8418341 1.101674356 0.9671354  
0.6712391 0.4261149 0.4248355 1.1401750.9655213 1.0471761.692327  
0.2985734 1.4335631.3454110.6253938 0.9810004 0.4910582.523108534  
0.3996257 1.0992321.4849310.6488343 1.4994050.2481891.7753540.7642273  
1.0789410.6879026 0.440738342 0.776918186 4.3499683.16578 1.081339  
0.9237722 0.5896514 0.4230490.9859901 0.3212969 0.4175655  
1.6335120.6911968 0.4193647 0.7527512 0.5425312 0.6271041  
0.9940757 1.3877330.3235849 0.655565506 1.5762080.2038396 0.2158135  
2.1085821.97667 2.7859570.2461068 0.1694721 0.3062948 0.6479383  
0.8265838 0.458794265 0.7663450.8466506 0.8452610.2281896 0.5508874  
0.091179037 0.3820845 0.1476209 4.0655790.7327 0.6505452 1.326012  
1.096859854 0.4630714 4.0049722.3773990.4590018 0.192711856 1.335812  
2.1493333.3452591.596528259 0.201788875 0.3624658 0.1379232 0.4624601  
3.6922130.8819444 0.3834026 1.2920430.3781320.5837664 0.2616036  
0.9209692 0.3488835 2.080363919 0.3711022 0.8427708 1.304413  
0.4197104 0.8016905 0.7878638 0.1459166 0.3283021.2354210.8247851  
1.26068 0.1749981 0.4513268 0.6039481 0.6317320.3049942 2.729199  
0.5459083 1.1403520.3313511.2245923.0477651.3810261.5871990.8058559  
0.3458552 1.57716 0.2239065 1.8145520.3724257 0.5836803 1.468605  
1.3493840.3895314 0.08340759 0.5389936 0.4674807 2.3923240.4435113  
0.3369059 1.1852830.9372007 0.8723365 1.91432410.579252.189297  
1.4594491.563555827 0.2931327 1.3858541.3872433.0065550.3535342  
0.626444344 0.342082071 0.8308225 1.170648789 0.8670078 2.004359  
0.1075880.5883371 0.3575920.2728383 0.6403263 2.3091270.5669414  
0.5942469 0.7402338 0.628507503 1.9614291.0010010.5645469 1.890413  
0.8586389 0.8111057 0.7426301 0.28071 1.1861621.344528  
AC079921.2 0.1301669 1.2040980.2635245 0.486879384 0.54984067 0.1514923  
0.6916628 1.3785310.9201984 1.3287950.1855670.443546749 0.1322115  
0.559813098 0.836202499 1.1553930.4091623 0.2501696 0.1445416  
0.1892163 0.276330157 0.5077919 0.06827913 0.2479650.1325587  
0.3790194 0.7239251 0.4397543 0.7649776 0.270877416 0.862645  
0.205740527 0.15274 0.2998995 0.2743419 0.035419174 0.2657590.3259744  
1.1753890.5612587 0.3233412 0.08546703 0 0.4683297 0.3167067  
0.04385422 0.7353321.2398130 0.3186934 0.09106982 0.1379 0.2323113

|             |             |             |             |             |             |
|-------------|-------------|-------------|-------------|-------------|-------------|
| 0.043183599 | 0.1540262   | 0.2155949   | 0.5349259   | 1.0403670   | 0.06988644  |
| 0.2638744   | 0.4394203   | 0.3327003   | 0.4775543   | 1.6327620   | 1.664154909 |
| 0.1090522   | 0           | 0.04773509  | 0.293478855 | 0.5003049   | 0.1150016   |
| 0.3199574   | 1.256849514 | 0.3622511   | 0.05602613  | 1.1895460   | 0.3897111   |
| 0.1831495   | 0           | 0.3478861   | 0.08056187  | 0.4654685   | 0.05527187  |
| 0.1235193   | 0.5089602   | 0.4905003   | 0.1004886   | 0.8066066   | 0.1214378   |
| 0.212328864 | 0.07389217  | 0.4681327   | 0.1388168   | 0.079507761 | 0.3231962   |
| 0.1636412   | 0           | 0.2676587   | 1.2567840   | 0.3560564   | 0.04736442  |
| 0.170309    | 0.71670893  | 1.6119020   | 0.436926602 | 0.3575858   | 0.05841918  |
| 0.3470178   | 0.06681788  | 0.09773513  | 0.3783259   | 0.1023679   | 0.3183902   |
| 0.1355221   | 0.08204132  | 0.1112206   | 0.3826284   | 0.6923617   | 0.05033476  |
| 0.4332813   | 0.2063368   | 0.1999517   | 0.1827355   | 0.5847670   | 0.406212255 |
| 0.03195127  | 0.07580588  | 0.4744406   | 0.2691372   | 0.67058884  | 1.3737660   |
| 0.1662076   | 0.5334281   | 0.7343088   | 0           | 0.2044351   | 0.2958341   |
| 0.1247327   | 0.7999055   | 0.2948067   | 0.09842923  | 8.4825150   | 0.04750551  |
| 1.0276320   | 1.002029    | 0.1965734   | 0.5817141   | 0.232406984 | 0.07384558  |
| 0.2049107   | 0.578240526 | 1.0204760   | 0.1876562   | 0.04958655  | 0.1870753   |
| 0.2776098   | 0.5956694   | 0.267135006 | 0.3926560   | 0.1101166   | 0.05702029  |
| 0.1999460   | 0.9734057   | 0.1990132   | 0.2284941   | 1.2565140   | 0.899466549 |
| 0.1953275   | 0.1122984   | 0.6502927   | 0.4853454   | 0.3884903   | 0.4585169   |
| 0.08618732  | 0.2960311   | 0.3725188   | 0.2442982   | 0.3785368   | 1.0908170   |
| 0.04750758  | 0.1560598   | 0.1950805   | 0           | 0.4206201   | 0.1695850   |
| 0.452144089 | 0.3158835   | 0.1246698   | 0.2221804   | 0.2062617   | 0.6038806   |
| 0.1898731   | 0.205086092 | 0.6561239   | 0.05073943  | 0.2929769   | 0.1394692   |
| 0.569085419 | 0.5632108   | 0.1223727   | 0.4091808   | 0           | 0           |
| 0.1632329   | 0.09316508  | 0.07464299  | 0.1680393   | 0.2092416   | 0.3272756   |
| 0.2105479   | 0.04957485  | 0.843442083 | 0.506165992 | 0.3575497   | 0.406760285 |
| 0.339752277 | 0.3237999   | 0.055898215 | 0.1370599   | 0.06420707  | 0.2449760   |
| 0.398934262 | 0.06589847  | 0.4417748   | 0.03757271  | 0.739407243 | 0.5427398   |
| 0           | 0.7932641   | 1.2338991   | 0.3226360   | 0.3813534   | 0.1841070   |
| 0.1403170   | 0.07352316  | 0.1784084   | 0.1606706   | 0           | 0.1586841   |
| 0.4093972   | 0.6827548   | 0.3696460   | 0.1655562   | 0.4750318   | 0.1136385   |
| 0.2411027   | 0.05938403  | 0.1845774   | 0.05144416  | 0.376396233 | 0.07858873  |
| 0           | 0.3970519   | 0           | 0.3490090   | 0.3690165   | 0.2641302   |
| 0.3505608   | 0.6005664   | 0.2199051   | 0.4715795   | 0.1439009   | 0.4861763   |
| 0.2336095   | 0.27599652  | 0.2529499   | 0.1856710   | 0.08360645  | 0.3962523   |
| 0.3314781   | 0           | 0.2308723   | 0.1418346   | 0.4185724   | 0.1055226   |
| 0.322078019 | 0.286259448 | 0.2286466   | 0.08438132  | 1.12461     | 1.2667230   |
| 0.7299937   | 0.3135054   | 1.29208     | 1.894136    | 0.3279160   | 0.4686360   |
| 0.5772633   | 0.3283487   | 0.1683941   | 0.5437236   | 0.1736596   | 0.5082961   |
| 0.1400117   | 0.3040276   | 0.127436569 | 0.1351430   | 0.0957598   | 0.1272281   |
| 0.2659248   | 0.2294611   | 0.2358175   | 0.4624644   | 0           | 0.2423432   |
| 0.05797878  | 0.2602305   | 0.387078723 | 0.1986283   | 0.3030398   | 0.8542374   |
| 0.7530074   | 0.4705382   | 0.498433258 | 0.8205519   | 0.6724788   | 0.1448287   |
| 0.7616517   | 0.1697852   | 0.06826679  | 0.472342808 | 1.1737140   | 0.2419880   |
| 0.043268    | 0.7416059   | 1.095219026 | 0.14242     | 1.3006480   | 0.2958187   |
| 0.780018092 | 0.236991055 |             |             |             |             |

|                   |                    |                    |                           |                           |             |             |            |
|-------------------|--------------------|--------------------|---------------------------|---------------------------|-------------|-------------|------------|
| 0.6691676         | 0                  | 0.1428523          | 0.04964661                | 0.6119188                 | 0.4366423   | 0.2569212   |            |
| 0.9904716         | 0.2792281          | 0.3823438          | 0.2708785                 | 0.08194929                | 0.586388291 |             |            |
| 0.4482938         | 0.2639447          | 0.3420209          | 0.3466754                 | 0.3958616                 | 0.3918947   |             |            |
| 0.09139832        | 0.7867954          | 0.07088566         | 0.4132989                 | 0.2388878                 | 0.04243131  |             |            |
| 0.1630957         | 0.08729934         | 0.5862226          | 1.0064560.3682940.3674606 |                           | 0.09740273  |             |            |
| 0.3444439         | 0.9147453          | 0.1988583          | 0.9749602                 | 0                         | 0.9318773   | 0.3938811   |            |
| 0                 | 0.1121993          | 1.2687490.4419998  | 0.04062244                | 0                         | 0.2105735   | 0.3659883   |            |
| 0.2786363         | 1.4611380          | 0.1882918          | 0.2409864                 | 0.6176458                 | 0           | 1.38296     |            |
| 0.2835418         | 0.7391602          | 0.1639562          | 0.0474231                 | 0.2551145                 | 0.486787522 |             |            |
| 0.1915937         | 0                  | 0.3317743          | 0                         | 0.9663032                 | 0.081183769 | 1.0285017   |            |
| 0.7434362         | 0.965069416        | 0.2391505          | 0                         | 4.0434180.1417380.3199803 |             |             |            |
| 1.2400090.7620587 | 0.3800697          | 0.1103991          | 0.5583308                 | 0.08430235                |             |             |            |
| 1.200402909       | 0.5415815          | 0.05016003         | 0.2121704                 | 0.07104628                | 0.2415915   |             |            |
| 0.2920557         | 0.6350741          | 0.3356741          | 0.2637802                 | 0.2165598                 |             |             |            |
| AL355073.2        | 0.1860779          | 0.6010884          | 0.2767716                 | 0.397720144               | 0.084215946 |             |            |
| 0.2062507         | 0.5215411          | 0.6256049          | 0.4698051                 | 0.5080881                 | 0.1010568   |             |            |
| 0.271742061       | 0.4590018          | 0.876487743        | 1.170983751               | 0.8151109                 | 0.2088968   |             |            |
| 0.4087151         | 0.5313265          | 0.3348937          | 0                         | 0.1382677                 | 0.08366339  | 0.1157467   |            |
| 0.03609468        | 0.2408093          | 0.02815986         | 0.02763268                | 0.04463514                | 0           | 0.2684473   |            |
| 0.084032262       | 0.1559621          | 0.1749862          | 0.08964135                | 0.057866156               | 0.07236405  |             |            |
| 0.1065123         | 0.2743277          | 0                  | 0.1320648                 | 0.1047240                 | 0.1530269   | 0.1552261   |            |
| 0                 | 0                  | 0.2109945          | 0.0543947                 | 0.1301665                 | 0           | 0.06758832  | 0.04744238 |
| 0.6710419         | 0.1408915          | 0.3177950          | 0                         | 0.4311054                 | 0.05127885  | 0           | 0          |
| 0.04599186        | 0                  | 0.145650901        | 0.2227054                 | 0.06009956                | 0.2729556   | 0           |            |
| 0.04086871        | 0                  | 0.09801208         | 0                         | 0.3205738                 | 0.04576641  | 0           | 0.3638236  |
| 0.2618183         | 0.3544654          | 0.1623885          | 0.1316181                 | 0                         | 0.2483265   | 0.103257006 |            |
| 0                 | 0.05196968         | 0.1001695          | 0.3693904                 | 0.7349244                 | 0           | 0.05781546  |            |
| 0.2414430         | 0.1133961          | 0                  | 0                         | 0.4010237                 | 0.05545505  | 0.2756144   | 0          |
| 0.03311732        | 0.2908540          | 0.09074725         | 0.06956066                | 0.087819362               | 0.6144712   |             |            |
| 0.178457454       | 0.1752620.09544247 | 0.03149673         | 0                         | 0                         | 0.1030151   | 0.08362189  |            |
| 0.04334755        | 0                  | 0.06701759         | 0                         | 0                         | 0           | 0.1516874   | 0.0240788  |
| 0.1225018         | 0.1865903          | 0.6513848          | 0.27652091                | 0.07830068                | 0.09288602  |             |            |
| 0.02981224        | 0.03664196         | 0.136947003        | 0.07013727                | 0.09265755                | 0           | 0           | 0          |
| 0.06041841        | 0                  | 0                  | 0                         | 0.1537468                 | 0           | 0           | 2.0058110  |
| 0.02728445        | 0.08028807         | 0.08639789         | 0                         | 0                         | 0.04184667  | 0           | 0.1515642  |
| 0.07664594        | 0.08101214         | 0.1146130.04535456 | 0                         | 0.18184684                | 0           | 0.04497581  |            |
| 0.04657852        | 0.1361093          | 0.1966572          | 0.2168596                 | 0.2216852                 | 0           | 0.1207549   |            |
| 0                 | 0                  | 0                  | 0.08853477                | 0.07208492                | 0.1057828   | 0.06810027  | 0.07040436 |
| 0.04836415        | 0.0676226          | 0.1197368          | 0.1374301                 | 0.5312104                 | 0           | 0.3399508   |            |
| 0.1912279         | 0                  | 0                  | 0.04617664                | 0.110803713               | 0.04300629  | 0.4413057   | 0          |
| 0.03369805        | 0.2055398          | 0.06204112         | 0                         | 0                         | 0.1243435   | 0.02659176  |            |
| 0.1139291         | 0.542351005        | 0.04600734         | 0.2998899                 | 0.0835625                 | 0.05561743  | 0           |            |
| 0.05333641        | 0.03805217         | 0.02032469         | 0.04575576                | 0.4557986                 | 0.04455727  |             |            |
| 0.1146610         | 0                  | 0                  | 0.1168295                 | 0.036919196               | 0.039647932 | 0.1889317   | 0          |
|                   |                    |                    |                           |                           |             |             | 0          |

|            |             |             |             |             |             |             |             |
|------------|-------------|-------------|-------------|-------------|-------------|-------------|-------------|
| 0.2097969  | 0.08576359  | 0.046554268 | 0.3768162   | 0           | 0.1227690   | 0.15100103  | 0           |
| 0.1969227  | 0.3239993   | 0.4810636   | 0.2160859   | 0.07787962  | 0.3007852   |             |             |
| 0.0286554  | 0.1201186   | 0           | 0.1312480   | 0.349104158 | 0.06481263  | 0.074317066 |             |
| 0.1062335  | 0.2013034   | 0.05409558  | 0.09701053  | 0           | 0.1313007   | 0.09701879  |             |
| 0.3392479  | 0           | 0.341632328 | 0.03209863  | 0           | 0.1081141   | 0           | 0.06335491  |
| 0.1674671  | 0.2157616   | 0           | 0.1032818   | 0.08981762  | 0.04280245  | 0.1175492   |             |
| 0.1323819  | 0.1144980   | 0.354286376 | 0.1291430   | 0.1365922   | 0.02489916  |             |             |
| 0.2256471  | 0           | 0.1131564   | 0           | 0           | 0.04309946  | 0.112756219 | 0.374141612 |
| 0.3424225  | 0           | 0.4593335   | 0.2299457   | 0.1277817   | 0.2195101   | 0           |             |
| 0.03868186 | 0           | 0.07656352  | 0.4715526   | 0           | 0           | 0.2220774   | 0           |
| 0.1429653  | 0.1064369   | 0.10409989  | 0           | 0           | 0.3377712   | 0.2172276   | 0           |
| 0.07705349 | 0.05396802  | 0           | 0.03299406  | 0.04736148  | 0           | 0           | 0.4867641   |
| 0.04361288 | 0.03417299  | 0.03843714  | 0.050894778 | 0.3112057   | 0.02746659  |             |             |
| 0.02957678 | 0           | 0.02773869  | 0.05576551  | 0.105230608 | 0.1983680   | 0.07906969  |             |
| 0.4948243  | 0           | 0.028859944 | 0.2326790   | 0.09665889  | 0           | 0           | 0.03904479  |
| 0.02566222 | 0.07779511  | 0.2027757   | 0.08331031  | 0.2140096   | 0.1259237   |             |             |
| 0.1055338  | 0.1303399   | 0           | 0.1229301   | 0           | 0.031933773 | 0.04068895  |             |
| 0.2156101  | 0.09312956  | 0           | 0.2155799   | 0.07113988  | 0           | 0           | 0           |
| 0.1626181  | 0.06932225  | 0.07993738  | 0           | 0.1436614   | 0           | 0.03008506  | 0           |
| 0.1989149  | 0.08657477  | 0.0934042   | 0           | 0           | 0.5479375   | 0.08458092  |             |
| 0.06435041 | 0           | 0           | 0.06477566  | 0.1504413   | 0.0331835   | 0           | 0.05733748  |
| 0.08535426 | 0.4882780   | 0           | 0           | 0.05045401  | 0           | 0.03530335  | 0.1158092   |
| 0.4017957  | 0           | 0.03473283  | 0.51125799  | 0.02608472  | 0           | 0           | 0.6267404   |
| 0.08457322 | 0.066317082 | 0.070013207 | 0           | 0           | 0           | 0.08546413  | 0           |
| 0          | 0           | 0.2293449   | 0.2587249   | 0.1623283   | 0           | 0.06886458  | 0.031631628 |
| 0.04915611 | 0.1229236   | 0           | 0.1160720   | 0           | 0.08191213  | 0.2350322   |             |
| 0.1723806  | 0.0589675   |             |             |             |             |             |             |
| KLF7-IT1   | 0.1808426   | 0.3717488   | 0.1046051   | 0.724744122 | 0.190975195 | 0.8068024   |             |
| 0.5174272  | 0.2128012   | 0.2796595   | 1.2176490   | 0.1289053   | 0.154056314 |             |             |
| 0.2525644  | 0.09721945  | 0.124472891 | 0.6566735   | 0.1065852   | 0           | 0.1757118   |             |
| 0          | 0.095977268 | 0.1175803   | 0.2134374   | 0.1968577   | 0           | 0.2047798   |             |
| 0.3591995  | 0.09399329  | 0.0379569   | 0.125444503 | 0.05707066  | 0.619315633 |             |             |
| 0.07957639 | 0.1785661   | 0.3049175   | 0           | 0           | 0.0905761   | 0.1166416   |             |
| 0.2339292  | 0           | 0.6827576   | 0.2157909   | 0.1626641   | 0.1760019   | 0.1218545   |             |
| 0.02837795 | 0           | 0           | 0.3320737   | 0.03163112  | 0.05747587  | 0           | 0.059995535 |
| 0.07133022 | 0.08985866  | 0.1689044   | 0.3030668   | 0.09709414  | 0.1466416   |             |             |
| 0.1308198  | 0.09904817  | 0.03685958  | 0.1173319   | 0           | 0.289004001 | 0           |             |
| 0.07666135 | 0.1657974   | 0.237844823 | 0.1042620   | 0.1666954   | 0.113879827 |             |             |
| 0.2726101  | 0.3113513   | 0.3787326   | 0.03867362  | 0.09541949  | 0.04306155  |             |             |
| 0.1035691  | 0.05596282  | 0.2155605   | 0.1151849   | 0.482943262 | 0.2359595   |             |             |
| 0.1546792  | 0.1135764   | 0.03490253  | 0.02155056  | 0.05623839  | 0.147495623 |             |             |
| 0.07699452 | 0.1422713   | 0.09643     | 0           | 0.2245103   | 0           | 0.09431592  | 0           |
| 0.6507579  | 0.1689742   | 0.2061141   | 0.1316080   | 0.05915311  | 0.049786651 |             |             |
| 10.823940  | 0.03035139  | 0.04967986  | 0.04058126  | 0.08035272  | 0.09283095  |             |             |

|             |             |             |             |             |             |             |             |           |
|-------------|-------------|-------------|-------------|-------------|-------------|-------------|-------------|-----------|
| 0.04526156  | 0.1314033   | 0           | 0           | 0.06276085  | 0.1424763   | 0           | 0           | 0.1030615 |
| 0.2097922   | 0.4299738   | 0.04095233  | 0.1736222   | 0           | 0.1846419   | 0.141088989 |             |           |
| 0.02219515  | 0.02632952  | 0.1014071   | 0.0623193   | 0.058228611 | 0.2982173   |             |             |           |
| 0.1181914   | 0           | 0.02850379  | 0.06801232  | 0.05137871  | 0.04733738  | 0.04110061  |             |           |
| 0.1083080   | 0.09805757  | 0.06826314  | 0.0227915   | 17.884050   | 0.06730816  |             |             |           |
| 0.04759008  | 0.09280879  | 0.06827551  | 0.2204135   | 0.040360755 | 0.05129731  | 0           |             |           |
| 0           | 0.03222185  | 0.1955349   | 0           | 0.06497654  | 0.03856869  | 0           | 0.061855689 |           |
| 0.1168976   | 0.03824661  | 0.1188285   | 0.09259587  | 0           | 0.09220672  | 0.1382458   |             |           |
| 0.03174499  | 0.3337351   | 0.374892165 | 0.09045701  | 0           | 0.07528834  | 0.0612997   |             |           |
| 0.02248894  | 0.05791122  | 0.5088999   | 0           | 0.08625753  | 0           | 0.05843401  |             |           |
| 0.1165759   | 0.1320058   | 0           | 0.05420556  | 0.3488312   | 0           | 0.03926777  |             |           |
| 0.062816965 | 0.03657176  | 0           | 0.07716954  | 0.0286562   | 0.1048724   | 0.7386209   |             |           |
| 0.455886032 | 0.06511153  | 0           | 0.06783943  | 0.0484416   | 0.197659439 | 0.2151809   |             |           |
| 0           | 0.14212     | 0.2601282   | 0.1794492   | 0.2041034   | 0.03235886  | 0.13827     |             |           |
| 0.5836479   | 0           | 0.1136720   | 0.02437641  | 0.1721875   | 0.42611092  | 0.023440766 |             |           |
| 0.1490245   | 0.062790816 | 0.033715875 | 0           | 0.116490172 | 0           | 0.2230093   |             |           |
| 0.1701742   | 0.197944481 | 0.0457768   | 0.3836022   | 0.02610013  | 0           | 0.2154387   |             |           |
| 0           | 0           | 0.1558429   | 0.04593888  | 0.1324548   | 0.06394556  | 0.3898885   |             |           |
| 0.4085867   | 0.1239326   | 0.1116109   | 0           | 0.3306928   | 0.094796807 | 0.4516953   |             |           |
| 0.08559234  | 0.04600189  | 0           | 0           | 0.02791392  | 0.0412515   | 0.03205447  |             |           |
| 0.07147204  | 0.087155362 | 0.1364804   | 0.1194815   | 0.1471012   | 0.08115458  |             |             |           |
| 0.02693793  | 0.02848219  | 0.03669595  | 0           | 0.5708880   | 0.03639842  | 0.06664113  |             |           |
| 0.1125752   | 0.03245567  | 0.027388968 | 0.3074983   | 0.2579552   | 0.02903888  | 0           |             |           |
| 0.1151317   | 0.1439875   | 0.06415078  | 0.1231579   | 0           | 0           | 0.351581349 |             |           |
| 0.079540793 | 0.0264718   | 0           | 0.2130594   | 0.1303611   | 0.03622106  | 0.03111122  |             |           |
| 0.06773978  | 0.06578869  | 1.2040270   | 0.2004998   | 0.3421343   | 0.2573473   |             |             |           |
| 0.5665517   | 0.1723339   | 0.3177821   | 0.1215750   | 0.088524639 | 0.093878    |             |             |           |
| 0.3326008   | 0.06628487  | 0.07389056  | 0           | 0           | 1.9275230   | 0.08417263  |             |           |
| 0.08055068  | 0.1355781   | 0.122221248 | 0.0344946   | 0           | 0.3708759   | 0.1453004   |             |           |
| 0.03268624  | 0.238039929 | 0.2850008   | 1.2379260   | 0.2766671   | 0.08139789  |             |             |           |
| 0.04717694  | 0.1896879   | 0.178972362 | 0.08434426  | 0.03361971  | 0.0300564   |             |             |           |
| 0.04479664  | 0.319045582 | 0.1483995   | 0           | 0.1232954   | 0.125041068 | 0.164627374 |             |           |
| 0.2324208   | 0.6765030   | 0.06615554  | 0.1379494   | 0.1062683   | 0.1213266   | 0           |             |           |
| 0.02991467  | 0.2493870   | 0.03794251  | 0.0209075   | 0.0569266   | 0.081467686 | 0           |             |           |
| 8.9841940   | 0.07919567  | 0.1204102   | 0.06110841  | 0.09074407  | 0.06349043  | 0           |             |           |
| 0.1477235   | 0.2871008   | 0.08297248  | 0           | 0.04531819  | 0.1212861   | 0.04072234  |             |           |
| 0.03884119  | 0.2046703   | 0           | 0.2706458   | 2.1166210   | 0.1588584   | 0.05525528  | 0           |           |
| 0.03328257  | 0.1078891   | 0.2736121   | 0           | 0.4286699   | 0           | 0.1791055   |             |           |
| 0.08465592  | 0.3973127   | 0.3413112   | 0.2259877   | 0.1693620   | 0.1845434   |             |             |           |
| 0.0887597   | 0.06539905  | 0.02790046  | 0.04290517  | 0.1570763   | 0.09006396  |             |             |           |
| 0.04924103  | 0.2053850   | 0.03294277  | 0.2362893   | 0           | 0.08872786  | 0           | 0           | 0         |
| 0.1438390   | 0.028197416 | 0.178613845 | 0.0688577   | 0.078869616 | 0.08306371  |             |             |           |
| 0.1090157   | 0           | 0.3347614   | 0.04445527  | 0.1325201   | 0.2228922   | 0           |             |           |
| 0.07668947  | 0.1662206   | 0.05856118  | 0.053797914 | 0           | 0.2090639   | 0.1105391   |             |           |

0.09870552 0.1678231 0.2028784 0.06965658 0.1998670 0.1002898  
AL133371.2 0.4028976 0.5176349 0.9321954 1.399364217 1.861439768  
0.1563016 0.4940449 1.0272121.1570950.2625279 0.4786450.514831048  
0.4092261 1.732754827 1.109248213 0.1625552 0.4749205 2.71017  
0.3355429 0 0.427653815 0.08731871 0 0.1644666 0.06838345  
0.2607012 0.5335049 0.4711653 0.1691277 1.886467718 3.687269  
0.583747925 0.1772875 0.06630431 0.5094922 0.054815389 0.7540383  
1.1098651.0394590.6948918 0.2502045 0.3968112 0.1201897 1.159673  
0.3921131 0.1357392 0.1896690.07994827 0.1030539 0.2466080.2818828  
0.08536665 0.2696470.801981125 0 0.1334635 0.2257804 0.1038769  
0.3244728 0.0816754 0.1943015 0.2206685 0.4105956 0.6970739  
0.2399637 0.643869459 2.7003410.05693105 0 0.454193466 0.3871407 0  
0.06189652 2.114265487 0.2803134 0.4335355 0.07670682 0 0.2125842  
0 0.1538272 0 1.2006130.1283097 0.097813184 0.0477902 0.3446085  
0.3162949 0.4665543 0 0.5011720.38337156 0.4002493 0.1358421  
0.1432237 0 0.3001108 3.7988130.1050628 0 0.1035584 0  
0.1836799 0 0.05730864 0.8566135 0.720975055 1.6630730.338097966  
0.8854506 0 1.0741030.5170431 0.05041891 0 0.7129193 0  
0.2097365 1.01575 0.08606353 0 0.1530732 0.1557981 0.2394837  
0.1368560.4641736 0.4949086 0.8227241 0.314330912 0.04944839  
0.4106152 1.8073930.4165218 1.037816062 0.3321978 0.1755451 0  
0.3810201 0 0.1144662 0.2109251 0 0.09651938 0.1456411  
0.2281243 0.05077698 10.8246 0.07352043 0 0.2120510.1550759  
0.6844968 0.2455287 0.179838738 0.3428545 0.2378428 0.511369172  
1.2203750 0.3837055 0.3619016 0 0.4609346 0.620134836 0 0  
0.5294741 0.2062935 0.2235471 2.2596920.7279921 0.2121731  
2.1733820.64961473 0.1007642 0 0.5032027 1.9119670.1503087  
0.3870597 0.06669257 0.09162868 1.2811490.3024644 0.4556461  
0.9739440.2940945 0 1.0264950 0.4882198 0 0.139949361 0.4073895  
0.1929414 0.9455893 0 2.18068 0.1763107 0.634790286 1.885798  
0.07852531 0 0.3237679 0.146787906 0.8280539 0.3787725 0.712413  
0.05268521 0.0666322 0.1010489 0.5767362 0 0.08668693 0.4317684  
0 0.1086160 0.355998282 0.783352131 1.2173720.489618861 0.300461197  
0.07158841 0.259527425 0.1414110.5962085 0 0.088199752 0 0.7406740  
0 0 0 5.72913 0.3472010.1023468 0.2950949 0.1424637 0.162868  
1.9343590.1104433 0.5470452 0.440932009 1.1051210.915186863 1.610125  
1.0487970.0512436 1.5622330 0.06218918 0.2757116 1.9995880.1592319  
3.559832101 0.5473144 0.3549224 0.08193135 0.06026786 0.4201034  
0.1903657 0.4087729 0 1.6632230.08508234 0 0.8908150.627013  
0.2169231 0.122039277 0.4893376 0.2873481.2939090.1415187 1.1970040  
0.1429210.8780238 0.6477905 0.9798530.213623176 0.354416459 0.0589763  
0.1305901 0.4746731 0.5082530.8069659 0.8317492.4901280.7328501  
0.07249843 0.4351620.3573534 0.05081587 0.05212199 0.5609847  
0.03839413 0.2359946 0.4333695 0.4705188 0.85463413 0.06971665



|             |             |             |             |             |             |             |             |
|-------------|-------------|-------------|-------------|-------------|-------------|-------------|-------------|
| 0.4445991   | 0.7876026   | 0           | 1.0653553   | 1.3861902   | 0.2044911   | 0           | 0.1875275   |
| 0.08972907  | 0.1006844   | 0.544591277 | 1.6907050   | 0.2344951   | 1.9004240   | 0.1942281   |             |
| 1.6748920   | 0.916019454 | 0.5442436   | 0.2601852   | 0.05603492  | 0.9067282   |             |             |
| 0.4729729   | 0.2113020   | 0.731006727 | 0.7516393   | 0.5243073   | 0.2678495   |             |             |
| 1.5968330   | 0.437414665 | 0.3306178   | 1.4831960   | 0.8240663   | 2.414341715 | 0           |             |
| 0.2589041   | 0.1944742   | 1.7686480   | 0.3073362   | 0.2367543   | 0.6757559   | 0           |             |
| 0.6664664   | 0.8642776   | 0.08453179  | 0           | 0           | 0.605003793 | 0.3854378   |             |
| 0.9531336   | 0.9704163   | 0.3755650   | 0.1361429   | 0.3369465   | 0           | 4.5385490   | 0           |
| 0           | 0.1313350   | 0.4053184   | 0.3628997   | 0.2163349   | 0.1709937   | 0.09478151  |             |
| 0           | 0.08201045  | 0.3539193   | 0.1846541   | 3.8165460   | 0.07414994  | 2.003043    |             |
| 0.6705357   | 0.09219372  | 0.08682089  | 0.3681637   | 0.1710118   | 0.3772084   |             |             |
| 0.08851695  | 0.4888312   | 0.1888035   | 0.1078057   | 0.5139283   | 0           | 0           |             |
| 0.1864776   | 0.5735283   | 0.2099693   | 5.21697     | 0.6033701   | 0.07626256  |             |             |
| 0.2537418   | 0.1467858   | 0.1974101   | 0.215246183 | 2.1744360   | 0.2093657   | 0           |             |
| 0.1079451   | 1.7625170   | 0.251283094 | 1.061152548 | 1.3039630   | 0.966421054 | 0           |             |
| 0.08095837  | 5.0061360   | 0.04387129  | 0.2971245   | 0.07381008  | 0.6207245   |             |             |
| 0.7842708   | 0.1366846   | 1.4195660   | 0.179783846 | 1.5831950   | 0.4104486   |             |             |
| 1.0995260   | 0.2670655   | 0.2824943   | 0.2586455   | 0.07421367  | 0.5715237   |             |             |
| 0.167576    |             |             |             |             |             |             |             |
| NCBP2-AS1   | 0.07903819  | 0           | 0.1523940   | 0.278222314 | 0.2861820   | 0.04307509  |             |
| 0.04133593  | 0.04656253  | 0.06866833  | 0.1502366   | 0.224437023 | 0.08027968  |             |             |
| 0.075538244 | 0.145070718 | 0.2551134   | 0.1656306   | 0           | 0           | 1.0468060   | 0.167789441 |
| 0.5938294   | 0.8291905   | 0.2581131   | 0.6439239   | 0.8864768   | 0.251184    |             |             |
| 0.6298972   | 0.3539042   | 0.036550778 | 0.2660590   | 0.41642322  | 0.1545745   |             |             |
| 0.1387435   | 0.3553753   | 0.229405328 | 0.2510209   | 0.05278234  | 0.271887    |             |             |
| 0.2726399   | 0           | 0.1037923   | 1.38325     | 0.9479092   | 0.1025634   | 1.100647    |             |
| 0.03307395  | 0.3345878   | 0.2156431   | 0.3225211   | 0.2949236   | 0.312606    |             |             |
| 0.4231827   | 0.209770864 | 0           | 0.4538235   | 0.9449030   | 0.2445358   | 0.5658066   |             |
| 0.2563619   | 0.4065811   | 0.1923978   | 0.08591823  | 0.09116536  | 0.1673768   |             |             |
| 0.288710149 | 0.1324344   | 1.2508620   | 0.5797010   | 0.237602987 | 0.2430307   | 0.1862125   |             |
| 0.4857004   | 0.353932557 | 0.6110033   | 0.09071846  | 0.4414054   | 1.983227    |             |             |
| 0.4819080   | 0.3011244   | 0.3218875   | 0.3261179   | 0           | 0.1118714   | 0           | 0.2000045   |
| 0.4378122   | 0.3971133   | 0           | 0.5023351   | 0.2949513   | 0.200553805 | 0.2692068   |             |
| 0.02368777  | 0.7117861   | 0.064370163 | 0.5233248   | 0           | 0.3297701   | 0.1170696   |             |
| 0.3792228   | 0.2954041   | 0.2882663   | 0.5751996   | 0.1798798   | 0.1034127   |             |             |
| 0.290126836 | 6.0030430   | 0.212243705 | 0.05790091  | 1.0878230   | 0.2185156   | 0.1081927   |             |
| 0.2373816   | 0.1531479   | 0.1657558   | 0.0859238   | 0.3657327   | 0.3985281   |             |             |
| 0.1350677   | 0           | 0.3603484   | 0.6927747   | 0.4259572   | 0.5966143   | 0.1214120   |             |
| 0.2582358   | 0.274060759 | 0.1034721   | 0.1227462   | 0.2068291   | 0.1452638   | 0           |             |
| 0.3823230   | 0.4591660   | 0.1345631   | 0.1661031   | 0.07926703  | 0.4790470   | 0.4689517   |             |
| 0.1437059   | 0.2777079   | 0.07618945  | 0.3182374   | 0.1859413   | 2.710862    |             |             |
| 0.4615304   | 0.2353390   | 0.4437224   | 0.08112512  | 0           | 0.2140731   | 0.376317359 |             |
| 0.05978601  | 0.7465386   | 0.100317529 | 0.2628775   | 0.1519281   | 0.0401457   |             |             |
| 0.1514578   | 0.3596084   | 0.2411295   | 0.216274783 | 0.3178976   | 0.133727    |             |             |

|                     |                    |                    |                     |                     |                  |             |
|---------------------|--------------------|--------------------|---------------------|---------------------|------------------|-------------|
| 0.1846565           | 0.3507357          | 0.2728707          | 0.1791085           | 0.8349091           | 0                | 0.1196805   |
| 0.14564316          | 0.6325553          | 0.09091777         | 0.3217393           | 0.0714436           | 0.5242084        | 0           |
| 0.6628909           | 1.0066110.1340419  | 0.07911436         | 0.1702592           | 0.1358669           | 0                |             |
| 0.4211580.2211143   | 0.4573755          | 0.1277016          | 1.3272090.292847773 | 0.767226            |                  |             |
| 0.1345783           | 0.4047281          | 0.5343719          | 0.2037112           | 1.7524410.265663123 |                  |             |
| 0.2656018           | 0                  | 0.1054207          | 0.2258310           | 0.1823921           | 0.6439807        | 0.6625525   |
| 0.1102452           | 0.6274334          | 0.7664974          | 0.03771362          | 0.1410071           | 0.6802302        |             |
| 0.3952756           | 1.2365040.1136409  | 0.1605449          | 0.620779922         | 0.191238278         |                  |             |
| 0.5210556           | 0.292725867        | 0.117885577        | 0.2247010.045255672 | 0.2589181           |                  |             |
| 0.5718085           | 1.0766740.36912067 | 0.9603354          | 0.2980539           | 0.5779645           |                  |             |
| 0.149657605         | 0.0627724          | 0.3252845          | 0.2140778           | 0.6584155           | 0.2677043        |             |
| 0.3087469           | 0.5216911          | 0.8520139          | 0                   | 0.2311056           | 0.4162570.153777 |             |
| 0.3854160.147311764 | 0.4737978          | 0.1995124          | 0.08042145          | 0.04807372          |                  |             |
| 0.4140120.4879969   | 0.5288560          | 0.7913431          | 0.270874316         | 0.5726351.021191    |                  |             |
| 0.4929002           | 1.4502890.06279125 | 0.1327817          | 0.3849157           | 0.4459982           |                  |             |
| 0.2559072           | 1.0237130.2545299  | 0.07766893         | 0                   | 0.03782644          | 0.287291751      |             |
| 0.3583832           | 0.3006417          | 0.1353770.2220987  | 0.2683675           | 0.1258610.1121497   |                  |             |
| 0.3157839           | 0.3388798          | 1.0679             | 0.260757115         | 0.185406475         | 0.1851142        | 0           |
| 0.4138609           | 0.4937832          | 0.2110747          | 0.2538166           | 0.1381614           | 0                | 0.3034098   |
| 0.1517647           | 0.9814502          | 0.3455841          | 0.1363333           | 0.6603049           | 0.7431518        |             |
| 0.2880646           | 1.1335470.21098    | 0.06878249         | 1.1670720.07752795  | 0.1545074           |                  |             |
| 0.0430590.04644341  | 0                  | 1.0697580.1145897  | 0.6540103           | 0.6571617           |                  |             |
| 0.6057189           | 0.170935767        | 0                  | 0.3066795           | 0.2161243           | 0                | 0.1142855   |
| 0.4539778           | 0.2372592          | 0.1905556          | 0.9380365           | 0.1423015           | 0.3299028        |             |
| 0.2210775           | 0                  | 0.4587407          | 0.8620284           | 0.1751507           | 0.1566288        | 0.54346048  |
| 0.1153044           | 0                  | 0.09579893         | 0.582931671         | 0.383739965         | 0                | 0.3306408   |
| 0.4019432           | 0.3715610          | 0.7488203          | 0.06972994          | 0.1614753           | 0.08844251       |             |
| 0.04873456          | 0.2985608          | 0.094948994        | 0.08065389          | 2.9204560.4153545   |                  |             |
| 0.3648728           | 0.2136620.2115209  | 1.7019280.02895438 | 0.2869482           | 0.5258163           |                  |             |
| 0.2256399           | 0.2061165          | 0.4753572          | 0.07067829          | 0.5695330.2489776   |                  |             |
| 0.6261654           | 0.09916642         | 1.4983040.7293385  | 0.2777196           | 0.4507926           |                  |             |
| 0.09286307          | 0.3103215          | 0.08382843         | 0.1275558           | 0.6269829           | 0.09083752       |             |
| 0.3209968           | 0.8349759          | 0.9208717          | 0.6482843           | 0.3693778           | 0.03292303       |             |
| 0.08459488          | 0.1075409          | 0.5689623          | 0.9146558           | 0.09755233          | 0.05000513       |             |
| 1.0618020.2799141   | 0.08608419         | 0.7181165          | 0                   | 0.5375181           | 0.3098144        |             |
| 0.225204192         | 0.1034106          | 0.07301722         | 0.4604697           | 0                   | 0.2235221        | 0.032863536 |
| 0.10408547          | 0.0802523          | 0.551525959        | 0.1936183           | 0.2541113           | 1.3094341.49178  |             |
| 0.1554353           | 0.1930620.2922486  | 0                  | 0.2323882           | 0.1291513           | 0.9214007        |             |
| 0.094050624         | 0                  | 1.66501            | 0.3864936           | 0                   | 0.5029575        | 0.4137889   |
| 0.1353056           |                    |                    |                     |                     |                  |             |
| 1.1647060.2562704   | 0.6720931          |                    |                     |                     |                  |             |
| AC108463.2          | 0.07187616         | 0.4432563          | 0.08315092          | 0                   | 0.075903369      | 0           |
| 0.2937888           |                    |                    |                     |                     |                  |             |
| 0.1691563           | 0                  | 0.06244596         | 0                   | 0.244919625         | 0.07300515       | 0           |
| 0.131925152         |                    |                    |                     |                     |                  |             |
| 0.05799907          | 0                  | 0.4144193          | 0                   | 0.1393098           | 0.30517044       | 0.8100294   |
| 0.1885134           | 0.0391207          | 0.1463937          | 0.2325429           | 0.07614099          | 0.07471554       |             |

0.4827529 0.249290502 0.2268282 0.227213446 0.1265110.3311997  
0.3029747 0.078231671 0.24458 0.3599960.3708750.4958694 0 0.3775485  
0.3430656 0.8275340.06995221 0.09686247 1.1278860.1141009 0.1103077  
0 0.05028734 0.1522924 0.1924180.143071876 0 0.1904771 0.2148202  
0.1111886 0.5402629 0.4079805 0.2773041 0.6298694 0.410197  
0.4352482 0.05707875 0 0.1806508 0.1625022 0.1581515 0.378127084  
0 0 0.08833775 0.844885121 0.8667942 0.5568616 0.4378991  
0.06148354 0.3033969 0.06845951 0.1097699 0 0.6853986 0.1220811  
0.418792369 0.06820542 0.2459099 0.3611289 0.2219530.06852241  
0.1788162 0.351734101 0 0.09693586 0 0 0.6424701 0.7831210  
0.1596920 0.4477268 0.06553628 0.1046156 0.2044750.09404196  
0.593633307 4.2723220.193011266 0.4738880.3225816 0.08516349 0.1475832  
0.2518498 0.2785409 0.1695779 0 0.1496663 0.4077175 0.2456571  
0 0.2730795 0.2779407 0.1025362 0.3255313 0.1104102 0  
0.05870895 0.971984421 0.07057197 0.08371766 0.5642618 0.1486134  
0.740577481 0.3318753 0.5637043 0.1835545 0.2265775 0 0.2450465  
0.07525724 0.5227359 0.3443774 0.1039283 0.2713128 0.07246812  
3.9443480.5770997 0.1605104 0.6052718 0.1106610.2713620.3504147  
0.19249729 0.1631055 0.3960198 0.136840901 0.4610383 0.6217251  
0.1642856 0.3099002 0.3065836 0.1096398 0.344184869 0 0  
0.3148572 0.03680236 0.05317382 0.1465908 0.3596466 0 0.7754544  
0.331114304 0.5752363 0 0.03989795 0.1949092 0.1430122 0.230169  
0.1427739 0.1307710.3199763 0.05395907 0.1857974 0.3011662  
0.1049318 0 1.2064680 0 0.2497125 0.299600331 0.4069940.1376815  
0.06134229 0.5466936 0.2778779 0.4613179 0.045298142 0.5693308  
0.1120701 0.2516536 0.07701274 0.418986838 0.2798966 0.2702891  
0.2824291 0.03759576 0.04754822 0 0.1028886 0.4121670.06185912  
0.4621599 0.1807165 0.3875376 0.1094978 0.846792029 0.223597599  
0.2369201 0.299475614 0.053601694 0.1532548 0.061732251 0.3531843  
0.7090829 0.1159474 0.503509263 0.07277623 0.1219706 0.2489648  
0.136096398 0.5137586 0.4437134 0.04866979 1.45559 0.1460678 0  
0.1016610.1162213 0.6495735 0.1970287 0.2839034 0.262204714  
0.2628687 0.150708516 0.07181078 0.2041128 0.1097011 0 0.1254988  
0.2662663 0 0.4586435 0.05681334 0.415680306 0.3905593 0.06331746  
0.02923279 0.2150334 0.5567390.1811246 0.2916971 0.05530693  
0.3490773 0.4249987 0 0.1059464 0.7158906 0.2579910.130629421  
0.2095125 0.2050493 0.1846647 0.1346489 0.1830371 0.2289122  
0.05099364 0.1566377 0.5778229 0.1748039 0.152439839 0.063227208  
0.08417006 0 0.1129077 0.2590610 0.2967648 0.3230793 0.05229562  
0.5690775 1.0350940.2550046 0.2175709 0.07438769 0.3002357  
0.2465798 0.6736158 0.3865614 0.09593103 0.187649316 0.3482448  
0.05287707 0.5620271 0.05873582 0.1900573 0.2083437 1.678117  
0.07815459 0.1784242 0 0.2873905 0.155446442 0 0.2510008  
1.1792410.5543987 0.3117886 0.137613551 0.64728 0.2970659 0.07997217

|             |             |             |             |             |             |             |
|-------------|-------------|-------------|-------------|-------------|-------------|-------------|
| 0.3882205   | 0.07500218  | 0.07539172  | 0.521640723 | 0.8492430   | 0.1603464   |             |
| 0.3822707   | 0.4629167   | 0.039016963 | 0.3932105   | 0.3023991   | 0.8494017   |             |
| 0.331318365 | 0.261725559 | 0.7126148   | 0.1040815   | 0.1051745   | 0.05482817  |             |
| 0.1689460   | 0.2893285   | 0.05674717  | 0.2853511   | 0.8370067   | 0.1206425   |             |
| 0.03323886  | 0.1357534   | 0.086345201 | 0.1100182   | 1.0688050   | 0.3147643   |             |
| 0.1148573   | 0.1457258   | 0.2885309   | 0.1514062   | 0.03949602  | 0.3131357   | 0           |
| 0           | 0.09371965  | 0.2521649   | 0.1928214   | 0           | 0.3704997   | 0.2440395   |
| 0.05378427  | 0.02926101  | 0.9470778   | 0.1756903   | 1.0767160   | 0.3174769   |             |
| 0.3430455   | 0.5219881   | 0.1315774   | 0.3097736   | 0.1751458   | 0.1627103   |             |
| 0.08972432  | 0           | 0.1162754   | 0.1796383   | 0.3461820   | 0.7334705   | 0.211666    |
| 0.1559577   | 0.04435632  | 0.3410544   | 0.04994415  | 0.9545614   | 0.1565674   |             |
| 0.1088407   | 0.4828484   | 0.1571178   | 0.1408703   | 0           | 0.3526502   | 0.3984047   |
| 0.2617152   | 0.1540576   | 0.4954650   | 0.358627328 | 0.757230216 | 0.3284111   | 0           |
| 0.1320552   | 0           | 2.6792550   | 0.3130621   | 0.6360773   | 0.7373842   | 0.6644163   |
| 0.1399124   | 0.1706899   | 0.6166032   | 0.0931009   | 0.384877068 | 0.5316496   |             |
| 0.4431614   | 0.3514716   | 0.4707678   | 0.1905758   | 0.2419029   | 0.1476539   |             |
| 0.1059166   | 0.2913106   | 0.2391619   |             |             |             |             |
| SDCBP2-AS1  | 0.3393306   | 0.3450219   | 0.4221067   | 0.249558679 | 0.273573849 |             |
| 0.6964239   | 0.7695559   | 0.5953678   | 0.3740148   | 0.5008603   | 0.215001    |             |
| 0.640303672 | 1.2600490   | 0.601532371 | 0.415216372 | 0.9716060   | 0.7397665   | 0.5259387   |
| 0.3362871   | 0.6294      | 0.278849678 | 1.0501481   | 0.3933450   | 0.7546496   | 1.293084    |
| 0.9963244   | 1.0436081   | 1.13027     | 1.02927     | 0.708677977 | 0.6954872   | 0.949652915 |
| 0.4623980   | 0.9079017   | 0.4614056   | 0.329621764 | 2.0957930   | 0.4605252   | 2.814647    |
| 0.5160316   | 0.4048404   | 0.3928998   | 2.3946121   | 1.1447420   | 0.5468615   | 1.140772    |
| 0.4397254   | 0.4633769   | 0.9071436   | 0.6074652   | 0.3012283   | 0.4112872   |             |
| 0.6446809   | 0.39703797  | 0.6102091   | 2.0837480   | 0.8996720   | 0.3725284   | 1.065691    |
| 0.9349398   | 0.8868537   | 0.3890248   | 0.2379795   | 0.5050264   | 0.5968935   |             |
| 0.559776109 | 0.7703258   | 1.3116310   | 0.9152362   | 0.400357326 | 0.6619361   |             |
| 0.6318284   | 1.2735611   | 1.256055011 | 0.5652549   | 0.7977994   | 1.2170640   | 0.642956    |
| 1.36561     | 0.6603019   | 1.0698910   | 0.2800210   | 0.1913644   | 0.8583280   | 0.092124689 |
| 0.1765811   | 1.0628680   | 0.7745405   | 0.3211153   | 1.9062      | 0.9304349   | 0.694376778 |
| 0.3728295   | 0.4724011   | 0.5551418   | 0.374419251 | 1.4060390   | 0.3669627   |             |
| 0.3881990   | 0.4539691   | 0.2813533   | 0.7636732   | 0.7518746   | 0.4779628   |             |
| 0.4276541   | 0.6110642   | 0.75940592  | 10.422281   | 1.474600365 | 0.5372599   |             |
| 0.9235787   | 0.2161616   | 0.3596113   | 0.8547609   | 0.2333072   | 0.3099038   |             |
| 0.7139848   | 0.7547      | 0.7175077   | 1.0163471   | 1.13261     | 0.4879631   | 1.456086    |
| 1.4157981   | 1.8078620   | 0.5941147   | 0.9783531   | 0.9179314   | 0.554145722 | 0.2973483   |
| 0.7862198   | 1.5140480   | 0.2212965   | 0.535723311 | 0.6065025   | 0.7821663   |             |
| 0.8199794   | 0.2438416   | 1.3173411   | 1.1941940   | 0.7449688   | 0.3715058   | 0.492991    |
| 1.00768     | 0.4352238   | 0.9380853   | 13.1735     | 0.2077342   | 0.6572829   | 0.3763932   |
| 0.4906024   | 0.5510160   | 0.4269223   | 0.247555246 | 1.4738180   | 0.4939722   | 2.320158048 |
| 0.8945572   | 0.6733057   | 0.75614     | 1.01732     | 2.72048     | 0.6011005   | 1.168139647 |
| 0.5031570   | 0.1790277   | 0.7672026   | 1.0798380   | 0.4156940   | 0.5605947   | 0.4442554   |
| 0.7788395   | 0.6464165   | 0.921114626 | 0.5037216   | 0.3336713   | 0.9357239   |             |

|                             |                                   |                           |                     |                           |                        |
|-----------------------------|-----------------------------------|---------------------------|---------------------|---------------------------|------------------------|
| 0.4699820.9038526           | 2.3508770.4396976                 | 0.7700602                 | 1.3597920.7176636   |                           |                        |
| 0.3772723                   | 1.0372580.8682601                 | 0.2566386                 | 0.3762197           | 0.4645137                 |                        |
| 1.1495660.9190380.359943686 | 1.3872121.0716850.3238534         | 0.3515293                 |                     |                           |                        |
| 0.8463703                   | 0.5279764                         | 0.234550161               | 1.3242130.7452745   | 0.2992982                 |                        |
| 0.4769552                   | 0.467927144                       | 0.2368108                 | 0.7615120.6939209   | 1.3626750.7723949         |                        |
| 1.2225970.2507054           | 0.4882083                         | 1.0299890.6256280.7277943 | 0.4918233           |                           |                        |
| 0.4446832                   | 0.636199985                       | 0.601586639               | 1.7639590.334456255 | 0.397270713               |                        |
| 0.4460427                   | 0.250701701                       | 0.5481158                 | 1.0942730.6474538   | 0.37062153                |                        |
| 0.6945485                   | 0.3880136                         | 0.3117479                 | 0.649425986         | 0.3042714                 | 0.61267                |
| 0.8795584                   | 1.8016941.1196610.2084498         | 0.5676783                 | 0.9439760.3379927   |                           |                        |
| 0.4280835                   | 0.8791352                         | 0.409964631               | 0.6761085           | 1.14758333                | 1.403478               |
| 1.1432260.3452692           | 0.6591242                         | 0.2994281                 | 0.7163862           | 0.8056648                 |                        |
| 0.4708247                   | 1.4016570.468923625               | 0.5022668                 | 0.7135619           | 0.6054601                 |                        |
| 2.5455971.0783140.3769784   | 1.1905380.9714284                 | 0.7478065                 | 0.7150439           |                           |                        |
| 0.7872571                   | 0.8013604                         | 0.3815849                 | 0.4348083           | 0.786909742               | 0.7338617              |
| 0.7702740.6280785           | 0.5126478                         | 0.5203340.6972288         | 0.3106365           | 0.3776984                 |                        |
| 2.1412770.7808883           | 0.283742957                       | 0.661190194               | 0.5298275           | 1.58948                   | 0.5788953              |
| 0.6891099                   | 0.4969462                         | 0.9641566                 | 0.8829082           | 0.6212071.1450390.2311999 |                        |
| 0.7896472                   | 0.8504458                         | 0.6797181.3920240.9318476 | 0.1709769           | 0.7417635                 |                        |
| 0.3116695                   | 0.614415097                       | 0.6717744                 | 0.3113727           | 0.3281030.1490830.2765775 |                        |
| 0.3543074                   | 2.1408071.4600161.8613190.5590709 | 1.05406                   | 1.144205329         |                           |                        |
| 0.5178016                   | 0.4671988                         | 0.7363140.4409141         | 0.1952072           | 0.576328808               |                        |
| 0.4304460.3770057           | 1.62794                           | 0.7423195                 | 1.39351             | 1.1175360.86182087        |                        |
| 0.6806985                   | 2.2031761.1255220.5892944         | 0.491202224               | 0.7185927           | 0.3377212                 |                        |
| 0.7031708                   | 0.847678607                       | 0.807801941               | 0.5895205           | 0.7749256                 | 0.3203441              |
| 0.4341937                   | 0.3945127                         | 0.2447908                 | 0.8296441           | 0.6856491                 | 0.6172194              |
| 0.3368356                   | 0.7593008                         | 0.9004728                 | 0.951158994         | 1.17284                   | 11.384050.4729687      |
| 0.6297054                   | 0.7594881                         | 1.2059330.7634732         | 1.0305560.3735559   | 0.8473748                 |                        |
| 0.5848081                   | 0.2236061                         | 0.8704599                 | 0.8907415           | 1.8535790.3322750.4542414 |                        |
| 0.5150154                   | 1.0102110.7040814                 | 0.5897492                 | 0.4905302           | 0.5080008                 |                        |
| 0.1826523                   | 1.43378                           | 0.7551976                 | 0.4274808           | 0.3459571                 | 0.5601387              |
| 0.4129906                   | 0.7606447                         | 0.4681495                 | 0.8066880.5334699   | 0.4959648                 |                        |
| 0.5585076                   | 0.8237832                         | 1.3458940.3737823         | 0.3047134           | 1.1510540.7220135         |                        |
| 0.5841760.7182738           | 0.9743233                         | 0.6433906                 | 0.4147654           | 0.951262949               |                        |
| 0.3687793                   | 0.7735903                         | 0.6961701                 | 0.2424375           | 0.8938543                 | 0.263977287            |
| 0.562184656                 | 0.3556573                         | 0.241875891               | 0.3284783           | 1.4428861.2694220.9090373 |                        |
| 0.5740405                   | 1.3208331.4165920.1846651         | 0.2698494                 | 0.3666712           | 0.5718662                 |                        |
| 0.542718608                 | 0.5532667                         | 1.3891660.3449468         | 0.5257565           | 0.6385089                 |                        |
| 0.9905819                   | 0.8582338                         | 1.0430881.2954351.112906  |                     |                           |                        |
| ANKRD44-IT1                 | 0.06925392                        | 0                         | 0.08011735          | 0.118417811               | 0.029253684 0.04298658 |
| 0.02264565                  | 0.04346267                        | 0                         | 0                   | 0.05265543                | 0.094393719 0.04220503 |
| 0.099280854                 | 0.0762673                         | 0.02235324                | 0.1088452           | 0                         | 0.0769018 0            |
| 0.0294037                   | 0.02401469                        | 0.08718523                | 0                   | 0.01880705                | 0.07169892 0.1027084   |
| 0.1007856                   | 0                                 | 0.057646971               | 0.05245269          | 0.029189878               | 0 0 0 0 0 0            |

0.03573445 0 0 0.01818873 0 0.07973433 0.02696007 0 0.0347756  
0 0 0 0 0 0.036760594 0 0.0183528 0.04139659 0.01428429  
0 0.06738794 0 0.02022967 0 0.02396395 0 0.025297023 0 0 0  
0.020818971 0 0 0.03404598 0.023258898 0.02569758 0.09538592 0 0  
0.01948854 0 0.04230607 0 0 0 0 0.01314342 0 0.1217839 0  
0.01320451 0 0.120498451 0 0 0.0590848 0.033841002 0 0  
0.02889473 0.02051546 0.01424049 0 0.07577441 0 0 0.01812221 0  
3.1102110 0.03043995 0.02486504 0 0 0.08319828 0.0268379 0  
0.06775843 0 0 0.02366948 0 0 0 0 0.0125462 0.04255286 0  
0 0 0 0.1290615 0.06213441 0 0.035677961 0 0.0241395 0  
0.0174649 0 0.03148087 0.02900466 0 0.05309018 0 0.04182634 0  
25.336320.04043968 0 0.02915949 0 0.02091696 0.06752613 0 0 0  
0.087899051 0 0 0.0211056 0.01990628 0.07089568 0.08451187 0 0  
0.04686909 0 0 0.02049356 0.07532947 0.02310171 0 0.1101083  
0.025522749 0.02771251 0 0.03075389 0 0.04133842 0 0 0.07560009  
0.0176173 0 0.01790191 0.02678574 0.04044144 0 0.01660648 0  
0.02237864 0 0 0 0 0.02364174 0.05267487 0.08567685 0.01616319  
0.034916435 0.03989528 0.06478889 0 0.02968124 0.040370107 0.03595803  
0.02604283 0 0.01448967 0 0.01389541 0.01982699 0 0.02384093 0  
0 0.01493597 0 0 0 0.3652426 0.038473325 0 0.01968849 0 0  
0.0546571 0 0 0.02804846 0.03133887 0 0 0.03300102 0  
0.1875767 0.03580815 0.05629554 0.0202895 0.03918086 0 0.03129377  
0.01518725 0.01367729 0.060633307 0 0 0.0968673 0.03933324 0 0  
0.0483681 0.03420696 0 0.1571239 0 0.071202697 0.01672492  
0.02440299 0 0 0.0495164 0 0.02248442 0.02131567 0.05381472  
0.04679927 0 0 0 0 0.100690966 0.05383171 0 0 0.0259473 0  
0 0.07861321 0 0 0.02245687 0.039167579 0.048736407 0 0  
0.0217577 0.07987512 0 0.01906254 0.01037642 0.02015509 0.6779180  
0.02457014 0 0.01433477 0.07714195 0 0 0 0.01848624 0.018080336  
0.07669484 0 0 0 0 0.08029709 0.5905182 0.03012132 0.01719148  
0.02467759 0 0.029955067 0 0.06449163 0.04544878 0.03561152  
0.06008275 0.013259304 0.01247331 0.02862281 0.01541091 0 0 0  
0.018276722 0 0 0 0.09606763 0 0 0 0 0.076615435 0  
0.0305163 0 0.06080245 0 0.02170432 0 0.02187075 0.01832938 0  
0 0.03843147 0 0.033278038 0 5.8792920.02426247 0.02951119 0  
0.03706727 0.0389020.01522204 0.1206847 0.02513043 0.01694636  
0.0180601 0.04165119 0 0.07485443 0 0 0 0 0.02255479  
0.02433402 0 0 0 0 0.05029445 0.05071086 0 0 0.01567742  
0.01729019 0.02434423 0.01493778 0.01730846 0.01482455 0.08480538 0  
0 0 0 0.01924882 0.03678946 0 0 0.06978492 0 0.03619492 0  
0.1087310 0.0605201 0.08906227 0.1028223 0.017277182 0.01824011 0  
0.024162581 0 0 1.0326030 0.01361937 0.0202995 0.01707137 0  
0.0281936 0.03394902 0.03588173 0.032963175 0.1536761 0.06404905 0  
0 0.1028289 0.03107702 0.02845342 0.1428735 0 0.0768122

|             |             |             |             |             |             |
|-------------|-------------|-------------|-------------|-------------|-------------|
| MCM3AP-AS1  | 0.2881473   | 0.1760980   | 0.2432533   | 0.099872694 | 0.127473745 |
| 0.3021213   | 0.2291901   | 0.2260459   | 0.1720456   | 0.1133306   | 0.2516521   |
| 0.301858204 | 0.4231899   | 0.262362549 | 0.164381688 | 0.2765042   | 0.4130965   |
| 0.2357367   | 0.1059354   | 0.2754688   | 0.239722316 | 0.5299747   | 0.7087607   |
| 0.6379272   | 0.61332     | 0.2670773   | 0.6022397   | 1.2649080   | 0.4021036   |
| 0.194476093 | 0.4350090   | 0.447236531 | 0.1667738   | 0.2486346   | 0.6302830   |
| 0.250053316 | 0.6413044   | 0.3627510   | 0.9694444   | 0.5574211   | 0.2482634   |
| 0.2658974   | 0.7527144   | 0.6388497   | 0.2880136   | 0.7949982   | 0.3641744   |
| 0.5068752   | 0.7669081   | 0.2764734   | 0.2451880   | 0.3547683   | 0.2015350   |
| 0.335872437 | 0.2549551   | 1.049966    | 0.8350164   | 0.1867325   | 0.3951272   |
| 0.2083931   | 0.8525505   | 0.2303309   | 0.2666685   | 0.3132708   | 0.6895683   |
| 0.469377026 | 0.09460513  | 0.8539433   | 0.7625375   | 0.301422015 | 0.3771529   |
| 0.2752174   | 1.09353     | 0.457715542 | 0.7224381   | 0.3754229   | 0.3350893   |
| 0.5362691   | 0.7533392   | 0.4821422   | 0.6809053   | 0.4482545   | 0.2258826   |
| 0.3158055   | 0.166378875 | 0.4138424   | 0.2569270   | 0.8608211   | 0.1352731   |
| 1.1674850   | 0.7410822   | 0.44673751  | 0.2475704   | 0.3238418   | 0.9163491   |
| 0.36152247  | 0.6999822   | 0.1338035   | 0.7676423   | 0.5479153   | 0.4443820   |
| 0.8756253   | 0.6035715   | 0.4732394   | 0.2592114   | 0.4508820   | 0.340896171 |
| 4.9312250   | 0.216969535 | 0.1155277   | 0.8283540   | 0.2468341   | 0.5156970   |
| 0.3742336   | 0.2791635   | 0.2725436   | 0.1365177   | 0.6810852   | 0.2208805   |
| 0.4524871   | 0.4898951   | 0.2248696   | 0.7107096   | 0.5925215   | 1.3720510   |
| 0.3229989   | 0.1421276   | 0.8110404   | 0.372650559 | 0.2810073   | 0.5646566   |
| 0.6004590   | 0.8185297   | 0.381146648 | 0.3878393   | 0.4037883   | 0.5270344   |
| 0.6603847   | 0.2518826   | 0.6150920   | 0.6727137   | 0.3469097   | 0.3526099   |
| 0.2561789   | 0.4409502   | 0.3062243   | 3.4278570   | 0.1108462   | 0.3217383   |
| 0.2828183   | 0.3417176   | 0.1822925   | 0.6169696   | 1.136708519 | 0.2518324   |
| 0.4719952   | 0.973618663 | 0.3746504   | 0.3648871   | 0.2343706   | 0.3385743   |
| 0.5580669   | 0.3920217   | 0.538075355 | 0.4295724   | 0.3788199   | 0.7198203   |
| 0.8114619   | 0.2707845   | 0.4526677   | 0.5195683   | 0.1968565   | 0.2233171   |
| 0.480740526 | 0.3739604   | 0.6953864   | 0.6570859   | 0.2824582   | 0.5229677   |
| 0.3042528   | 0.8766060   | 0.3400562   | 0.4729892   | 0.3098620   | 0.2440897   |
| 0.4292269   | 0.3297107   | 0.5415410   | 0.2100867   | 0.6346790   | 0.2327791   |
| 1.785715    | 0.178538948 | 0.8000583   | 0.5370391   | 0.4120782   | 0.5257028   |
| 0.2197884   | 0.5543646   | 0.238040097 | 0.6028489   | 0.3612474   | 0.2220281   |
| 0.3713219   | 0.18158851  | 0.4532162   | 0.8419657   | 0.3947545   | 1.2464890   |
| 0.8629330   | 0.5996367   | 0.1923023   | 0.2500859   | 1.13606     | 0.4631931   |
| 0.0736690   | 0.4198961   | 0.4745627   | 0.311949053 | 0.405798035 | 0.8385611   |
| 0.351521234 | 0.188751265 | 0.3570101   | 0.551815708 | 0.4291420   | 0.6146318   |
| 0.7453971   | 0.269365869 | 0.9107507   | 0.3590207   | 0.7170928   | 0.497677952 |
| 0.2876057   | 0.4663395   | 0.4113221   | 0.3875709   | 0.3917037   | 0.5618443   |
| 0.4681353   | 0.8374047   | 0.1275658   | 0.3629163   | 0.4191169   | 0.539786589 |
| 0.5459004   | 0.195950797 | 0.7547261   | 0.5952776   | 0.3625257   | 0.2238131   |
| 0.3263463   | 0.6034435   | 0.5329336   | 0.2153403   | 0.7017512   | 0.252718079 |
| 0.5736305   | 0.9364490   | 0.4925254   | 1.0927150   | 0.3271338   | 0.2722942   |
| 0.6605511   | 0.7250916   | 0.2515193   | 0.9867538   | 0.2915463   | 0.1521004   |
| 0.1308936   | 0.1425617   | 0.702965494 |             |             |             |

|             |             |             |             |             |             |
|-------------|-------------|-------------|-------------|-------------|-------------|
| 0.4540126   | 0.3887983   | 0.3901634   | 0.5087974   | 1.4477380   | 0.3317345   |
| 0.3011206   | 0.3394333   | 0.6166787   | 0.4640290   | 0.613875199 | 0.363084633 |
| 0.5722678   | 0.5098940   | 0.2660791   | 0.5726117   | 0.2526901   | 0.1688106   |
| 0.2523318   | 0.1954845   | 1.8105450   | 0.2803805   | 0.3626397   | 0.4282565   |
| 0.5138179   | 0.5313311   | 0.5061361   | 0.1490133   | 0.2827159   | 0.2754438   |
| 0.411718144 | 0.8058530   | 0.3093778   | 0.2226492   | 0.1113702   | 0.2848651   |
| 0.3329663   | 0.8774966   | 0.6308684   | 0.6597120   | 0.5758235   | 1.3739950   |
| 0.2198492   | 0.4441993   | 0.1309648   | 0.2252586   | 0.2336604   | 0.320573527 |
| 0.3138436   | 0.1850754   | 1.6550080   | 0.3084664   | 0.1889404   | 0.4942049   |
| 0.249200285 | 0.4019615   | 0.9121086   | 0.5306802   | 0.4109009   | 0.34031206  |
| 0.3919593   | 0.3112663   | 0.3433519   | 0.31949459  | 0.303429573 | 0.3088466   |
| 0.6108485   | 0.1310497   | 0.5613886   | 0.3447491   | 0.1462938   | 0.6640426   |
| 0.5797075   | 0.3197998   | 0.3071822   | 0.4051601   | 0.7305394   | 0.301714317 |
| 0.2980111   | 10.201350   | 0.3853825   | 0.4397148   | 0.1710513   | 0.3725419   |
| 0.6835344   | 0.2503440   | 0.5725380   | 0.6499744   | 0.4097164   | 0.2995578   |
| 0.4805194   | 0.5155753   | 0.2023904   | 0.4054382   | 0.1722145   | 1.643359    |
| 0.5421425   | 0.4480884   | 0.6115317   | 0.2744986   | 0.3841172   | 0.3623967   |
| 0.2662906   | 0.4348198   | 0.12083     | 0.3842845   | 0.5509257   | 0.6780823   |
| 0.7528305   | 0.3695534   | 0.2457301   | 0.6855764   | 0.2821233   | 0.7033083   |
| 1.1631440   | 0.4109127   | 0.09238292  | 1.3555650   | 0.3594071   | 0.3795703   |
| 0.6801147   | 0.9476514   | 0.5342142   | 0.262116358 | 0.3419756   | 0.2886797   |
| 0.7769757   | 0.1710940   | 0.2518996   | 0.167571625 | 0.36664181  | 0.1423331   |
| 0.305678096 | 0.1681207   | 0.3974784   | 0.3386794   | 0.6122597   | 0.1856979   |
| 0.2311260   | 0.3887425   | 0.2122327   | 0.2655240   | 0.1789522   | 0.5875946   |
| 0.1440103   | 1.0113460   | 0.2602261   | 0.1700253   | 0.7970456   | 0.4739664   |
| 0.8339097   | 1.4545880   | 0.1578172   | 0.4470016   |             |             |
| AP000766.1  | 0.5936901   | 0.7278396   | 0.5171827   | 1.016684125 | 0.366352928 |
| 0.7825271   | 1.1577830   | 0.8360842   | 0.4803813   | 0.6804799   | 0.3670999   |
| 0.664181795 | 0.9335842   | 0.369152115 | 0.912450432 | 0.5598732   | 0.989303    |
| 0.1787141   | 0.5520249   | 0.5753426   | 0.47072909  | 0.8247189   | 0.3864615   |
| 0.1012224   | 0.8449816   | 0.5368933   | 0.6668038   | 0.9851983   | 0.6065312   |
| 0.243124476 | 0.3747158   | 0.493686157 | 0.2559963   | 0.8004563   | 0.2954809   |
| 0.630615299 | 0.3991734   | 0.4084129   | 0.5259438   | 0.3207580   | 0.2013723   |
| 0.3710280   | 0.3755491   | 0.7720652   | 0.6126056   | 0.3518401   | 0.09877447  |
| 0.3065842   | 0.3476202   | 0.5341386   | 0.3403019   | 0.2182417   | 0.2680838   |
| 0.327475626 | 0.3724161   | 0.4454587   | 0.2886062   | 0.3430196   | 0.5491741   |
| 0.3480082   | 0.5312316   | 0.5902617   | 1.8428010   | 0.2598873   | 0.8974875   |
| 0.339664468 | 0.1737855   | 0.4649369   | 0.9023546   | 0.209653071 | 0.5168608   |
| 0.0631953   | 0.5186749   | 0.33031568  | 0.1924277   | 0.2031962   | 0.2669175   |
| 0.6791704   | 0.6491521   | 0.2180121   | 0.5188881   | 0.4249930   | 0.2330466   |
| 0.3189147   | 0.159761534 | 0.3427734   | 0.1643133   | 0.3009844   | 0.3147551   |
| 0.4125579   | 0.2446845   | 0.167238898 | 0.2761140   | 0.1221923   | 0.5950010   |
| 0.5683257   | 0.1498726   | 0.4401979   | 1.4037980   | 0.1434059   | 1.25649     |
| 0.5205510   | 0.3703467   | 0.3509537   | 0.307198067 | 5.9877860   | 0.163267018 |
|             |             |             |             |             | 0.1964995   |



|           |           |           |           |           |            |            |
|-----------|-----------|-----------|-----------|-----------|------------|------------|
| 0.3595461 | 0.3940971 | 0.4112366 | 1.1171080 | 0.2356160 | 0.4500231  | 0.04665621 |
| 0.2581684 | 0.3651730 | 0.5806170 | 0.4709841 | 0.5109094 | 0.5753239  | 0.4387758  |
| 0.7191883 | 0.8954962 | 0.1506244 | 0.8179547 | 0.3943562 | 0.21065043 |            |
| 0.3707439 | 0.1644498 | 0.3795983 | 0.2395249 | 0.3302720 | 0.3552880  | 0.210068   |
| 0.1488187 | 0.3981349 | 0.3332790 | 0.4006812 | 0.1495606 | 0.8396487  |            |
| 0.3154501 | 0.2592021 | 0.1514479 | 2.3142870 | 0.2192827 | 0.2662249  |            |
| 0.4818783 | 0.4001258 | 0.1944368 | 0.2789775 | 0.4278337 | 0.5103408  | 0.669      |
| 0.5179687 | 0.2360450 | 0.2294055 | 0.5568494 | 0.3215341 | 0.5705458  |            |
| 0.5003682 | 0.4037075 | 0.5039968 | 0.6302079 | 0.2420437 | 0.3196029  |            |
| 1.0035130 | 0.8572545 | 0.4133341 | 0.4990844 | 0.2611677 | 0.3777309  |            |
| 0.2372505 | 0.9704293 | 0.3702593 | 0.4526393 | 1.0522740 | 0.3486872  |            |
| 0.2382194 | 0.3741550 | 0.2147298 | 0.4776458 | 0.2631221 | 0.2865948  |            |
| 0.6708922 | 0.3498233 | 0.6346057 | 0.3516160 | 0.2690487 | 0.0577844  | 1.31087    |
| 0.3279682 | 0.85285   | 0.7753389 | 0.5389309 | 0.3296481 | 0.3853705  | 0.5641324  |
| 0.3422302 | 0.0991744 | 0.8202    | 0.2935917 | 0.2174810 | 0.6046285  | 0.3985316  |
| 0.5003552 | 0.96296   | 0.5261395 | 0.5715897 | 0.3710054 | 0.3030545  | 0.5299674  |
| 0.4843758 | 0.3020551 | 0.3636892 | 0.8556880 | 0.5135854 | 0.4795826  |            |
| 0.6363480 | 0.4685661 | 0.3033724 | 0.4904    | 0.4153658 | 0.5101336  | 0.6107963  |
| 0.4587476 | 0.4021860 | 0.3501739 | 0.6059751 | 0.2805128 | 0.9596941  | 0.6269374  |
| 0.1628499 | 0.77077   | 0.8763383 | 1.2623660 | 0.6070171 | 0.3792289  | 0.9706135  |
| 0.5860595 | 1.2636360 | 0.2471157 | 0.4086422 | 0.2023398 | 0.7016698  |            |
| 0.1050458 | 0.8313660 | 0.6286335 | 0.5114385 | 0.290529  | 0.3487984  | 0.3149589  |
| 1.0219330 | 0.3994826 | 0.1928690 | 0.2414601 | 0.4621023 | 0.9185972  | 0.5351735  |
| 0.2992138 | 0.4862343 | 0.4642321 | 0.2304    | 0.4145841 | 1.1342080  | 0.6661969  |
| 0.2557151 | 0.4956864 | 1.0276190 | 0.3687663 | 0.4689778 | 0.5558713  |            |
| 0.1957954 | 0.2003258 | 0.1692027 | 0.1181026 | 0.79299   | 0.2710505  |            |
| 0.4183204 | 0.5283463 | 0.1875977 | 0.2793010 | 0.2335015 | 0.4313520  | 0.1792632  |
| 0.7877931 | 0.5856633 | 0.5815297 | 0.57075   | 0.2453948 | 0.7501774  | 0.8995579  |
| 0.4943938 | 0.5362438 | 0.1203432 | 0.6448064 | 0.5171089 | 0.0780644  | 0.780      |
| 0.5714768 | 0.2987272 | 0.4123807 | 0.3356057 | 0.6440465 | 0.6573277  |            |
| 0.2699274 | 0.4189760 | 0.7001430 | 0.2911762 | 0.5368855 | 0.4308169  | 0.7302473  |
| 0.6152432 | 0.0935233 | 0.2010087 | 0.4204    | 0.4405915 | 1.2343560  | 0.8088811  |
| 0.2485871 | 0.7455315 | 0.6792551 | 0.3171257 | 0.6105761 | 0.5239180  | 0.4079874  |
| 0.1936349 | 0.2574695 | 0.2327118 | 0.8148450 | 0.7033173 | 0.8803388  | 0.6023477  |
| 0.3740534 | 0.5537613 | 0.3097554 | 0.3676348 | 0.2170868 | 0.4605248  | 0.766      |
| 0.6436063 | 0.1854567 | 0.5811660 | 0.2135566 | 0.160616  | 0.6026189  | 0.1655160  |
| 0.3297177 | 0.93029   | 0.1719043 | 0.8102    | 0.2022454 | 0.3590727  | 0.1308330  |
| 0.8574623 | 0.2207469 | 0.1750664 | 0.3455    | 0.2893451 | 0.6183072  |            |
| 0.1190818 | 0.6034358 | 0.1847453 | 0.6103    | 0.16423   | 1.82753    | 0.4197466  |
| 0.2175327 | 0.5359892 | 0.5574966 | 0.7507296 | 0.4440627 | 0.3374276  |            |
| 0.5994795 | 0.3264341 | 1.3551120 | 0.3454017 | 0.2963681 | 0.5192664  |            |
| 0.6921526 | 0.0673086 | 0.5405969 | 0.3843794 | 0.5906349 | 0.3890225  |            |
| 0.1071514 | 0.4001948 | 0.3698372 | 0.1991288 | 1.4141710 | 0.1603041  |            |
| 0.2353046 | 0.6436488 | 0.5000289 | 0.3080133 | 0.5939969 | 0.2324016  |            |

0.2526404 0.5693432 0.4915015 0.4759598 0.2118818 0.09503391  
0.3031875 0.1947397 0.2415070.3303606 0.4024320.3231415 0.3458014  
0.481496353 0.6457416 0.17346 0.5365287 0.05365966 0.4854857  
0.218598083 0.188393025 0.2124360.124781638 0.3154013 0.3679499 0  
0.4797866 0.5943208 0.2096634 0.2292183 0.3132821 0.3615705  
0.3024292 0.3659720.276623937 0.1984055 0.5181991 0.1165912  
0.2889044 0.6372414 0.5376399 0.6391916 0.6271593 0.3072975  
0.4561791  
AP003071.4 1.6374786.7084511.1072544.387223114 0.426217517 5.6367165.071655  
3.4013945.93063 2.1840521.1398016.581738053 2.3073954.446931733 2.201218417  
2.2146251.0511871.8173342.4073380.07822612 0.4406433 0.07997415  
0.1330752 0.2259495 0.1096053 1.0744790.1465892 0.09589658  
0.1355393 0.047994246 3.8138230.413136807 0.2976884 0.3036365  
1.0888210.414189176 0.5493525 0.5082561 0.1487544 1.19333 0.2673524  
0 0.7155216 2.60554 0.04489145 0.01554024 0.3763836 0.01830591  
0.1769734 0.53643 0.1774939 0.1563726 0.9878656 0.030605199  
0.1091619 0.1222376 0.05169738 0.08324714 0.6934215 2.188061  
0.3559168 0.6736921 0.2820446 2.5936690.07325995 0.126366903  
1.1786390.01303561 0.06766189 0.883979339 0.01772887 0.08150422  
0.1133805 0.116185804 1.0055480.4566304 0.7728032 0.09864182  
0.7463627 0.02196676 0.7572754 0.3140282 1.2828980.08813797  
0.156775337 0.1860245 0.1803558 0.1593298 0.4985299 0.3847715  
0.08606575 0.401286119 0 0.08294408 0.06558842 0.225395834 0.2519621  
0.3092699 0.1683950.2391234 0.09484789 0.3016926 0.1682302  
0.1678412 0.05248829 0.2414037 0.660332293 0.03807971 0.603836648  
0.3801438 0.0621045 1.8445460.1183884 0 0.08937605 0.3083394  
0.07521678 0.1600793 0.8430960.3744166 0.3525306 0.01752473  
0.3745706 0.02193402 0.1566809 1.4171030.1295088 2.3547593.310756424  
0.03396688 1.2625460.4138422 0.4450685 1.009930817 0.5628735  
1.6881860.9129122 0.3053502 0.2255159 0.4193527 0.01207398  
0.6289930.1768019 0.06669544 0.2959930.3255421 0.07910199 0.08417059  
0.1888455 0.9953516 0.1183601 0.1567306 0.2810959 0.205890144  
0.3401843 0.7442775 0.043908451 0.9369179 0.09974717 0.1230009  
2.4196680.1377239 0.1055411 0.678413344 0 0.01951054 0.1010289  
0.03542657 0.2047441 1.2543180.3590241 0.1619391.4798350.297487119  
0.4845157 0.1193827 0.1536257 0.03127048 0.2409154 0.5465259  
0.09162437 0.2727452 1.2760610.3809073 1.7139964.80206 0.4377061  
0.03686772 3.4426230 0.01863144 0.1602516 0.416578238 1.082057  
0.1178084 1.4959110.24851 0.6241432 0.1211107 0.116279342 0  
0.3236417 0.1499618 0.2718238 4.940716285 1.10767 1.3876530.8337377  
0.03619031 0.01525691 0.03470605 0.1485635 0.1498867 0.158791  
2.0019730.05798691 0.1367851 0.08783706 0.027171208 0 0.1013615  
0.416404826 0.825566281 0.8523704 0 0.09713748 2.5937860.04960573  
0.141366892 0.1634631 0.02609132 0.0798859 1.637608527 1.483658

|             |             |             |             |             |             |                |
|-------------|-------------|-------------|-------------|-------------|-------------|----------------|
| 0.1423753   | 1.0307080   | 0.02981224  | 0.02343455  | 0.06756845  | 0.2283414   |                |
| 0.07458439  | 5.4973450   | 0.01264421  | 1.2298060   | 0.538459027 | 0.2530418   | 0.644775791    |
| 0.9677677   | 1.3972080   | 0.2112003   | 0.2524994   | 0           | 0.1708749   | 1.3257353.2213 |
| 0.05468947  | 0.785461679 | 0.7519179   | 0.2844354   | 0.1406999   | 0.1793955   |                |
| 0.9344356   | 0.01452947  | 1.0295730   | 0.2484504   | 3.5842950   | 0.3506665   | 0.05570319     |
| 0.8328843   | 0.8614104   | 1.1092810   | 0.027943573 | 0.2801115   | 0.2302812   |                |
| 0.1481345   | 0.2916343   | 0.1174630   | 0.03672579  | 0.2454367   | 0.1382169   |                |
| 0.3708147   | 0.09348286  | 0.114132008 | 0           | 0.6616920   | 0.08970444  | 8.115283       |
| 0.3823773   | 0.2032498   | 1.9362130   | 0.4751412   | 0.4362856   | 0.2158014   |                |
| 0.0664266   | 0.2863837   | 0           | 0.3938376   | 1.57351     | 0.02637354  | 0.6124098      |
| 0.1860553   | 0.2154712   | 0.722537554 | 0.3352263   | 0.05090036  | 2.186609    |                |
| 0.1319269   | 0.1422962   | 0.8356463   | 0.07023408  | 0.1504658   | 0.1145027   |                |
| 0.02054544  | 0.03458087  | 0.249392267 | 3.3081510   | 0.0268464   | 0.1324351   |                |
| 0.4892007   | 0.1500665   | 1.114948421 | 1.0073170   | 0.2144705   | 0.6671821   |                |
| 0.4359922   | 0.1082975   | 0           | 0.33476009  | 1.7067010   | 0.9432632   | 0.07666254     |
| 0.2742224   | 0.13771408  | 0.1514044   | 0.3153523   | 1.9707420   | 0.050388285 |                |
| 0.1355012   | 0.0779260   | 0.2362330   | 0.2990783   | 0.1264902   | 0.1856750   | 0.1456687      |
| 0.2899441   | 1.5124860   | 0.3483974   | 0.01066543  | 0.07259915  | 0.180087578 | 0.1059053      |
| 0.4676591   | 0.0907910   | 0.5528177   | 0.5455258   | 2.0985160   | 0.3724624   | 0.2027708      |
| 0.1255957   | 0.8159757   | 0.3103929   | 0.1052521   | 0           | 0.4330972   | 0.3739224      |
| 0.04953462  | 1.1745830   | 0.08628941  | 0.09389047  | 2.02594     | 0.2677772   |                |
| 0.8129135   | 0.03395652  | 0.2568388   | 0.4885169   | 0.1055489   | 0.09939775  |                |
| 0.3652964   | 0.16968     | 0.1295552   | 0           | 0.2736034   | 0.1296921   | 0.2221604      |
| 3.64793     | 0.1131963   | 0           | 0.1423271   | 0.9411402   | 0.1442312   | 0              |
| 0.2444678   | 0           | 0.3529032   | 0.7382890   | 0.344997387 | 0.3960448   | 0.7670221      |
| 0.1175680   | 0.3954624   | 2.0789820   | 0.417141678 | 1.700819271 | 0.7552092   | 0.080466664    |
| 0.2966099   | 0.0185372   | 0           | 0.1406341   | 1.7348460   | 0.3380088   | 0.5969397      |
| 0.9876682   | 0.03912118  | 1.0175190   | 0.1792410   | 0.46654188  | 0.1705916   | 0.159973       |
| 0.3195362   | 1.1329230   | 0.4280535   | 0.1681765   | 0.02368902  | 0.0679714   |                |
| 2.4863950   | 0.6906638   |             |             |             |             |                |
| AC007622.2  | 0.1382169   | 0.07103134  | 0.08994271  | 0.073855683 | 0.045612876 |                |
| 0.06702546  | 0.02824761  | 0.05421422  | 0.03053459  | 0.02251552  | 0.09852157  |                |
| 0.147180405 | 0.1140652   | 0.049536165 | 0.126845187 | 0.1254729   | 0.1221937   | 0              |
| 0.01918507  | 0.2511477   | 0.14670971  | 0.1797319   | 0.3534461   | 0.1974751   |                |
| 0.2815132   | 0.2683062   | 0.04575567  | 0.2963339   | 0.1305461   | 0.071907365 |                |
| 0.1526657   | 0.172950881 | 0.08109301  | 0.1137308   | 0.1747849   | 0.037609625 |                |
| 0.2116459   | 0.06922678  | 0.2451583   | 0.02979845  | 0.05722296  | 0.147473    |                |
| 0.2061596   | 0.2237818   | 0.1513319   | 0.3143227   | 0.09760095  | 0.1097073   |                |
| 0.1325752   | 0.08460065  | 0.06043869  | 0.1098212   | 0.1233391   | 0.057317788 |                |
| 0.02725863  | 0.1831425   | 0.1290926   | 0.1425429   | 0.1020366   | 0.02801933  |                |
| 0.3332826   | 0.1261699   | 0.1690293   | 0.07473006  | 0.05488085  | 0.094664588 |                |
| 0.04342365  | 0.5175610   | 0.1900770   | 0.064922637 | 0.1726548   | 0           | 0.08493618     |
| 0.2756193   | 0.1682861   | 0.04461824  | 0.1315741   | 0.2512431   | 0.0850833   | 0              |
| 0.2374718   | 0.4063345   | 0.1372930   | 0.1760702   | 0.100666544 | 0.08197385  |                |

|             |             |             |             |             |             |            |
|-------------|-------------|-------------|-------------|-------------|-------------|------------|
| 0.06755452  | 0.3797753   | 0.0400137   | 0.2141225   | 0.0644740   | 0.225460054 | 0          |
| 0.09320321  | 0.1351183   | 0.168849622 | 0.2573879   | 0.02896022  | 0.1441702   |            |
| 0.1279523   | 0.09769776  | 0.06457297  | 0.1102722   | 0.3394819   | 0.147451    |            |
| 0.05651296  | 0.095129102 | 6.1617150   | 0.092789547 | 0           | 0.4187162   | 0.08188414 |
| 0.0532126   | 0.1816140   | 0.2343384   | 0.06793669  | 0.09860683  | 0.08394355  |            |
| 0.2286770   | 0.1623859   | 0           | 0.2231796   | 0.2806001   | 0.2711168   | 0.3208212  |
| 0.1061587   | 0           | 0.08467242  | 0.089861229 | 0.008481812 | 0.1006175   | 0.07750488 |
| 0.09526053  | 0.02225189  | 0.1253591   | 0.0903330   | 0.3088514   | 0.07624847  |            |
| 0.05198141  | 0.07853688  | 0.1356738   | 0.2670101   | 0.2069479   | 0.08743562  |            |
| 0.09130294  | 0.1132262   | 2.5480620   | 0.2396063   | 0.1414689   | 0.1273048   |            |
| 0.1329998   | 0.01304564  | 0.07019199  | 0.123389939 | 0.05880935  | 0.1223905   |            |
| 0.131571648 | 0.1477618   | 0.2739846   | 0.03948988  | 0.08690707  | 0.1326502   |            |
| 0.1317724   | 0.165465771 | 0.2978138   | 0.1461583   | 0.06054664  | 0.115002    |            |
| 0.1150342   | 0.1761826   | 0.3361924   | 0.0242625   | 0.2060195   | 0.031836428 |            |
| 0.3802467   | 0.05962169  | 0.1438561   | 0.05856374  | 0.3007929   | 0.0663918   |            |
| 0.4232682   | 0.07858469  | 0.06592611  | 0.1426736   | 0.04466076  | 0.1837652   |            |
| 0.02522281  | 0.1380926   | 0.1035725   | 0.06665241  | 0.02791455  | 0.5702303   |            |
| 0.108023923 | 0.1956610   | 0.07722157  | 0.1032154   | 0.1423615   | 0.1469478   |            |
| 0.5746043   | 0.065330809 | 0.1119698   | 0.1616320   | 0.2160386   | 0.09255907  |            |
| 0.025178322 | 0.08223074  | 0.09745547  | 0.3394422   | 0.1265183   | 0.2971625   |            |
| 0.3813211   | 0.1483901   | 0.1387036   | 0.2973857   | 0.03703032  | 0.4488742   |            |
| 0.1863075   | 0.1710824   | 0.203546275 | 0.098536009 | 0.3606788   | 0.059988309 |            |
| 0.051537685 | 0.03683838  | 0.133549118 | 0.4366086   | 0.1193113   | 0.1579338   |            |
| 0.121030231 | 0.2624020   | 0.1856837   | 0.08976677  | 0.114498837 | 0.1029116   |            |
| 0.08532551  | 0.1169892   | 0.1637760   | 0.1228878   | 0.5188264   | 0.0244366   |            |
| 0.6052911   | 0.01951752  | 0.1420814   | 0.1023642   | 0.189081113 | 0.06318664  |            |
| 0.120754393 | 0.1898754   | 0.04906329  | 0.04394871  | 0.07881398  | 0.2714991   |            |
| 0.1813428   | 0.04729242  | 0.0612476   | 0.1365641   | 0.099918487 | 0.1251734   |            |
| 0.1521983   | 0.2037767   | 0.08270129  | 0.04117699  | 0.04353754  | 0.04206974  |            |
| 0.5051839   | 0.1510360   | 0.5545740   | 0.08345729  | 0.1400669   | 0.04302026  | 0.1116255  |
| 0.251198699 | 0.08393539  | 0.2217978   | 0.1331655   | 0.0323660   | 0.1026602   |            |
| 0.1650732   | 0.1838627   | 0.08471598  | 0.1527826   | 0.1120485   | 0.244283212 |            |
| 0.106386971 | 0.1315096   | 0           | 0.06785     | 0.2864483   | 0.04152531  | 0.05944531 |
| 0.09060294  | 0.03771143  | 0.4974221   | 0.1244046   | 0.1532408   | 0.1307456   |            |
| 0.1698678   | 0.5051808   | 1.0668820   | 0.09445293  | 0.3902601   | 0.1037667   |            |
| 0.112764758 | 0.5381279   | 0.2796253   | 0.1266528   | 0.02823706  | 0.03045647  |            |
| 0.05008027  | 0.9470538   | 0.1690766   | 0.1608316   | 0.09234661  | 0.3454051   |            |
| 0.140119459 | 0.02636402  | 0.1407791   | 0.1559021   | 0.05552612  | 0.1249095   |            |
| 0.330786366 | 0.1789272   | 0.1160359   | 0.3075709   | 0.01555298  | 0.09915691  |            |
| 0.07248865  | 0.079792715 | 0.08595176  | 0.3597348   | 0.05742981  | 0.1027134   |            |
| 0.0937864   | 0.1134208   | 0.01817217  | 0           | 0.127424192 | 0.150988467 | 0.1712936  |
| 0.2752026   | 0.05056228  | 0.2504055   | 0.1895139   | 0.09272917  | 0.2591697   |            |
| 0.05715902  | 0.1376591   | 0.1304966   | 0.08788713  | 0.1414032   | 0.13490808  |            |
| 0.05289088  | 4.6711330   | 0.09079317  | 0.1932604   | 0.1634668   | 0.1271511   |            |

|                   |                    |                     |                     |                   |                   |
|-------------------|--------------------|---------------------|---------------------|-------------------|-------------------|
| 0.3032835         | 0                  | 0.1693563           | 0.2507765           | 0.06341538        | 0.2365410.1818412 |
| 0.09269825        | 0.09337152         | 0.1261659           | 0.1075444           | 0.0812887         | 0.4912757         |
| 0.3094770.2124755 | 0.1900408          | 0                   | 0.03815651          | 0.0824590.1463841 |                   |
| 0.1423247         | 0.02978453         | 0.0631506           | 0.3520010.3019428   | 0.2884806         |                   |
| 0.2701786         | 0.0647704          | 0.1017047           | 0.0881534           | 0.2543944         | 0.3498887         |
| 0.04264832        | 0.1311687          | 0.3961731           | 0.1147256           | 0.1411299         | 0.5101672         |
| 0.2321278         | 0.3524915          | 0.1241587           | 0.23998568          | 0.1441051         | 0.1316781         |
| 0.2893831         | 0.1851567          | 0.07329021          | 0.15085782          | 0.079632874       | 0.01315688        |
| 0.316467783       | 0.1110989          | 0.1527534           | 0.6440216           | 0.2709065         | 0.05945958        |
| 0.0633027         | 0.2022968          | 0.01681561          | 0.08205862          | 0.09528108        | 0.2909267         |
| 0.020558713       | 0.0159743          | 0.4793590.1548881   | 0                   | 0.1740756         | 0.0678382         |
| 0.1774604         | 0.3309739          | 0.05601866          | 0.1437204           |                   |                   |
| AC004884.2        | 0.1355906          | 0.05574529          | 0.03137196          | 0.057961831       | 0.200462744       |
| 0.04208119        | 0.1330121          | 0.04254724          | 0.0958540.2356020   | 0.046202786       |                   |
| 0.02754407        | 0.116627729        | 0                   | 0.2188243           | 0                 | 0.05211866        |
| 0.1576803         | 0.172706348        | 0.1410533           | 0.1137985           | 0.2951965         | 0.07364372        |
| 0.2456607         | 0.2872719          | 0.1409469           | 0.3642751           | 0.11286559        | 0.2053917         |
| 0.257175659       | 0.06364168         | 0.1785116           | 0.3200656           | 0.029515979       | 0.1107329         |
| 0.05432907        | 0.0699636          | 0.09354312          | 0.1796340.07122252  | 0.06471751        |                   |
| 0.2341648         | 0.05278445         | 0.4750874           | 0.03404315          | 0.9040304         | 0.1664717         |
| 0.3319723         | 0.07589151         | 0.2757999           | 0.09679636          | 0.107958998       | 0.2139253         |
| 0.04052469        | 0.1957680.08735805 | 0.1319372           | 0.3661836           | 0.07921435        |                   |
| 0.08843598        | 0.1407553          | 0.3445633           | 1.139153658         | 0                 | 0.09196554        |
| 0.040760952       | 0.1250762          | 0.09583463          | 0.06665779          | 0.182152103       | 0.3270323         |
| 0.4668844         | 0.2065183          | 0.1391825           | 0.1144684           | 0                 | 0.1242450         |
| 0.2072695         | 0                  | 0.1286659           | 0                   | 0.2725002         | 0.08374051        |
| 0.05898024        | 0.09236522         | 0.09752765          | 0.03856022          | 0                 | 0.05386603        |
| 0.1697168         | 0                  | 0.1951678           | 0.1689226           | 0.2967137         | 0.0789407         |
| 0.1419241         | 0.059725744        | 23.462120.254873851 | 0                   | 0.1947306         | 0.1285251         |
| 0.05568157        | 0.1357432          | 0.2101810.4691862   | 0.04422086          | 0.4893852         |                   |
| 0.4102066         | 0.0463419          | 0.1275428           | 0.1236360           | 0.1289528         | 0.0736917         |
| 0.08331321        | 0                  | 0.2215026           | 0.282091844         | 0                 | 0.09475735        |
| 0.1869008         | 0                  | 0.1431006           | 0                   | 0.2077595         | 0.4787175         |
| 0.2465425         | 0.1703626          | 0.09861135          | 0.1039440.8626432   | 0.1637815         |                   |
| 0.3280974         | 15.377660.03958792 | 0.08074514          | 0.1141813           | 0                 | 0.1228584         |
| 0.4847618         | 0.58101746         | 0.2461519           | 0.04268973          | 0.172095395       | 0.2319265         |
| 0.04132213        | 0.03897402         | 0.2313415           | 0.5791230.296816674 | 0.04674476        |                   |
| 0.1835277         | 0.7602706          | 0.1110811           | 0                   | 0.1106143         | 0.3015352         |
| 0.06159384        | 0.099940728        | 0.05425764          | 0.2807461           | 0.3010614         | 0.07353718        |
| 0.08093548        | 0.03473613         | 0.5745821           | 0.09867704          | 0.1724624         | 0.2035818         |
| 0.0700994         | 0.1048863          | 0.1583586           | 0.1300499           | 0                 | 0.1569261         |
| 0.3768555         | 0.113036022        | 0.1316181           | 0                   | 0.6017387         | 0.1718847         |
| 0.2531641         | 0.136724062        | 0.15622             | 0.08456572          | 0.02712749        | 0.05811218        |
| 0.079039642       | 0.07040134         | 0.05098861          | 0.1278690.1702138   | 0.1076366         |                   |

|             |             |             |             |             |             |             |             |
|-------------|-------------|-------------|-------------|-------------|-------------|-------------|-------------|
| 0.1360274   | 0.1164564   | 0.08293665  | 0.09335516  | 0.3487361   | 0.4090945   |             |             |
| 0.1754566   | 0.3304990   | 0.063897127 | 0.028120333 | 0.4171414   | 0.112988968 |             |             |
| 0.161786799 | 0.2312856   | 0           | 0.1142166   | 0.1070118   | 0.2041467   | 0.617398263 |             |
| 0.05491539  | 0.2454304   | 0.09393177  | 0.462129527 | 0           | 0.1339267   | 0.183626    |             |
| 0.1635851   | 0.2204393   | 0           | 0.1534225   | 0.1753963   | 0.0612693   | 0.2378779   |             |
| 0           | 0.197854107 | 0.2644735   | 0.303257185 | 0.1625607   | 0.2310288   | 0.3035198   |             |
| 0           | 0.2367468   | 0.2009189   | 0.1484601   | 0.03845362  | 0.2572208   | 0.243960522 |             |
| 0.0327453   | 0.5255581   | 0.1985260   | 0.06490385  | 0.1292626   | 0           | 0.2201085   |             |
| 0.08346686  | 0.1053625   | 0.09162714  | 0.08732954  | 0           | 0           | 0.4282840   | 0.131426914 |
| 0.2898384   | 0.1547259   | 0.1741801   | 0.1778055   | 0.04603862  | 0.04318307  |             |             |
| 0.3463085   | 0.1181955   | 0.2616077   | 0.04396776  | 0.153370485 | 0.429389172 |             |             |
| 0.0952694   | 0           | 0.2555932   | 0.1172892   | 0           | 0.1119662   | 0           | 0.1578446   |
| 2.0299560   | 0.07810601  | 0.1443158   | 0.02736239  | 0.1122627   | 0.07551717  |             |             |
| 0.2067376   | 0.04235801  | 0.1458455   | 0.03619376  | 0.070798094 | 0.03753974  |             |             |
| 0.03989992  | 0.2385527   | 0           | 0.5258483   | 0.1572117   | 2.0370460   | 0.1769214   |             |
| 0.1682939   | 0.04831565  | 0.2168588   | 0.20526902  | 0.1655236   | 0.1893999   |             |             |
| 0.04449153  | 0.06972291  | 0.1568461   | 0.129800328 | 0.2442119   | 1.316938    |             |             |
| 0.3620718   | 0.2929430   | 0.08489258  | 0.05688899  | 0.071567092 | 0.1349096   |             |             |
| 0.3226507   | 0.07211333  | 0.1880884   | 0.029441372 | 0           | 0.05704598  | 0.04930311  |             |
| 0.250005799 | 0.157994037 | 0.2788198   | 0.07853766  | 0.03968121  | 0.04137218  |             |             |
| 0.08498872  | 0.07277371  | 0.08564041  | 0.1435466   | 0.3656559   | 0.4551712   |             |             |
| 0.3511388   | 0.06829107  | 0.065154255 | 0.04150869  | 24.341570   | 0.1425087   |             |             |
| 0.2311169   | 0.3665386   | 0           | 0.72357     | 0.08940857  | 0           | 0.09840451  | 0           |
| 0.08154784  | 0           | 0.2442594   | 0.0465952   | 0.09207351  | 0.2551810   | 0.08116894  |             |
| 0.3532758   | 0.09528597  | 0.3314305   | 0.1433765   | 0.1597076   | 0.1725699   |             |             |
| 0.2297640   | 0.09928554  | 0.1402491   | 0           | 0.06138886  | 0.06770407  | 0.04766297  |             |
| 0.1754779   | 0.1694390   | 0.4063447   | 0.1106923   | 0.1064791   | 0.1961373   |             |             |
| 0.2342924   | 0           | 0.1884340   | 0.2521021   | 0.1181424   | 0.2874512   | 0           | 0.03951925  |
| 0           | 0.057950895 | 0.02661023  | 0.1503138   | 0.3554725   | 0.05812428  | 0.08627708  |             |
| 0.03382657  | 0.107135594 | 0.1239060   | 0.33115127  | 0.2491151   | 0.08718593  |             |             |
| 0.6739030   | 0.1889840   | 0.1589756   | 0.1002709   | 0.1055749   | 0.07359941  |             |             |
| 0.1329359   | 0.03512598  | 0.096806686 | 0           | 0.2090001   | 0.08840432  | 0.05920524  |             |
| 0.1438045   | 0.2433797   | 0.1949789   | 0.3596509   | 0.08792673  | 0.06015549  |             |             |
| AC061992.2  | 0.1246337   | 0.05124062  | 0.2739501   | 0.026639024 | 0.105293563 |             |             |
| 0.5995507   | 0           | 0.1173272   | 0           | 0.8012847   | 0.09476205  | 0.084938456 |             |
| 0.1898871   | 0.73255565  | 0.137255461 | 1.1465070   | 0.1762962   | 2.3234920   | 0.4567112   |             |
| 0.2053294   | 0.370417319 | 0.2593101   | 0.3661095   | 0.1221040   | 0.2030781   |             |             |
| 1.1774342   | 0.23129     | 0.1036458   | 1.6532660   | 0.138326851 | 0.5506502   | 0.118196894 |             |
| 0.2632451   | 0.3445815   | 0.4413026   | 0.108523396 | 0.2883902   | 0.3495719   |             |             |
| 0.1929299   | 1.3327530   | 0.3508760   | 0.2455019   | 1.1897560   | 0.4484217   | 0.6307475   |             |
| 0.8733929   | 0.2503375   | 0.6726961   | 0.2422808   | 0.2746316   | 0.1220780   | 0.24295     |             |
| 0.06673082  | 0.38040098  | 0.25563     | 0.1321154   | 0.01862498  | 0.1542414   |             |             |
| 0.2676627   | 0.2627638   | 0.1923389   | 0.4004725   | 0.1016120   | 0.7762868   |             |             |
| 0.9897493   | 1.434072886 | 1.1694660   | 0.1268010   | 0.09141189  | 0.749342755 | 0.2107766   |             |

0.2642713 0.3369922 0.272078205 1.4452180.2360361.0630480.2771935  
1.0521850.0949674 0.1713075 0.1851295 0.1980811.0161090.290475516  
0.1537493 0.5482408 1.1428151.92434 0.5228006 0.4495994 0.04066062  
0.1698027 0.2689399 0.4784973 0.395865664 0.7426983 0.7729795  
0.1040016 0.2399860.2178388 1.1645421.2955 0.2902466 0.2978313  
0.1304555 0.301946818 0.2880980.251012126 0.6025983 0.4698613 0  
0.1791372 0.1622063 1.5938730.3332558 1.8901070.6920599 0.628431  
0.6389565 0.2051635 0.2083496 0.5590633 0.3318906 2.878815  
0.1531617 0.5598966 0.4275672 0.751959975 0.03671168 0.5806679  
1.3138970.3607752 1.284166339 0.7070109 0.4995942 1.46411 0.2514476  
3.1873620.1982924 0.2609931 0.5891779 0.01194306 0.4685523 0.11291  
0.1633583 0.2279842 0.0363889 0.1855507 0.8396363 0.06396229  
0.6964044 0.0405081 0.111263866 0.9333261 0.1569602 1.17059635  
0.8172089 0.0718717 0.8925997 0.3403338 0.3615003 0.1140697  
0.221675584 0.0214837 0.1897843 0.3494173 0.7530235 0.3134928  
0.9320278 0.2840979 0.8926273 0.4529324 0.551188255 0.3740489  
0.4731091 0.3320799 0.5407583 0.3099802 1.2133080.2805803  
0.8163282 0.2219365 0.3742616 1.2886960.4097451 2.2926010  
0.4034619 0.2884905 1.0068510.1515511 0.554142924 0.3629470.03183208  
0.2127359 0.4265866 0.3469263 0.5963102 0.267060762 2.4949830.64129  
0.07480611 0.05341625 1.017136397 0.2804202 0.3280782 0.2350723  
0.03911478 0.1484081 1.1878350.08920478 0.0762347 0.1072641  
0.1869906 0.1462363 1.4649440.0189870.234934893 0.245555836 0.3012688  
0.294265881 0.334604515 0.4783407 0.470994215 0.1224848 0.4426397  
0.6165642 0.349235381 0.07571668 0.6908929 0.04317066 0.330388899  
0.08908609 0.03077608 0.81018 1.3425550.6838629 0.6755139 0.2467932  
0.9135961.6895470.6559663 0.9230446 0.381918382 0.2431019 0.156797749  
0.3486571 0.2123598 0.2663114 0.5685487 0.4352315 0.2924148  
0.4321338 0.9190028 0.3546529 0.46451069 0.2407937 0.4611302  
0.1824835 0.07457387 0.2673385 0.04711069 0.4046438 0.9590258  
0.5689843 1.5370680.02006815 0.1102271 0.6517136 0.7336674  
0.105705738 0.5570540.8177809 0.1921259 1.4709371.3541870.4763223  
0.2122160.2851914 0.7214031 0.4041481 0.370064391 0.131563686  
0.7151621 0.9372151 1.4879480.2156225 1.8173030.3087553 0.7189511  
1.9587090.08970765 0.2871776 0.3758528 0.5533284 0.7868314  
0.3470739 0.4655773 0.1168054 0.13406 0.3992281 0.178961848  
0.05175933 0.4951217 0.8161929 0.6110899 1.0326230.7044752  
0.2024255 0.1084165 0.4640831 0.02220568 1.1586340.350408731  
0.3613513 0.1450790.2453775 0.8972423 0.4865792 0.441452225  
0.2244776 0.2446793 0.5546891 2.5805121.2485210.8628163 0.328919464  
0.7440470.3336501 0.4142875 1.6918461.001304024 0.02727319 0.5767983  
0.4985093 14.224824893 0.03630671 0.6041096 0.1684461 1.094239  
0.05704345 0.7616793 0.2341255 0.3542399 1.1050550.3208303  
1.7153980.4841459 0.3923288 0.494086431 0.4960079 0.2021799

|             |             |             |             |             |             |
|-------------|-------------|-------------|-------------|-------------|-------------|
| 0.2838178   | 0.3850490   | 0.4379951   | 0.2334801   | 0.4550682   | 0.9451118   |
| 0.05429794  | 0.04522631  | 0.06099549  | 0.1300084   | 0.7121021   | 0.2674828   |
| 0.9878937   | 0.2141497   | 0.08463322  | 0.4925766   | 0.03730492  | 0.3145805   |
| 0.8539644   | 0.2894158   | 0.4393017   | 0.05505072  | 0.9914052   | 0.2111972   |
| 0.8898091   | 3.4162710   | 0.3948153   | 0.3949970   | 0.1711408   | 0.1095285   |
| 0.0778735   | 0.2000941   | 1.1446590   | 0.1957495   | 0.7031224   | 0.8768214   |
| 0.3290933   | 0.1820737   | 0.2579144   | 0.4529534   | 0.1046578   | 0.01816289  |
| 0.4396860   | 0.4527779   | 0.5603956   | 0.3913586   | 0.5353982   | 0.1633737   |
| 0.5342737   | 0.4361785   | 0.15546555  | 0.24619543  | 1.2338450   | 0.521814123 |
| 0.6411567   | 0.3005273   | 0           | 0.4451385   | 0.1960822   | 1.4430241   |
| 1.5668590   | 0.6793053   | 0.5073899   | 0.2596614   | 0.1775813   | 2.254259401 |
| 0.3918007   | 0.1344779   | 0.3859876   | 1.7414710   | 0.03965517  | 0.7130842   |
| 0.3456444   | 0.5693463   | 0.6869831   | 0.8294166   |             |             |
| AC234775.3  | 0.0677126   | 0.7887619   | 0.2350028   | 0.434183597 | 0.095342037 |
| 0.7004978   | 0.6642494   | 0.2833024   | 0.5584664   | 0.5294580   | 0.08580588  |
| 0.461464415 | 0.5502095   | 0.226499583 | 0.579988014 | 0.4006887   | 0.1773712   |
| 0.4337925   | 0.1002537   | 0.6561999   | 0.191661923 | 0.5478717   | 0.1420747   |
| 0           | 0.1838848   | 0.2920966   | 1.7215290   | 0.8211875   | 0.07579809  |
| 0           | 0.1424592   | 0.35675282  | 0.02648503  | 0.1782939   | 0.4566790   |
| 0.122833265 | 0.3072163   | 0.4069711   | 0.6987828   | 0.1557151   | 0.07475621  |
| 0           | 0.4309239   | 0.4872485   | 0.2196670   | 0.4258405   | 0.05666939  |
| 0.1791524   | 0.09237149  | 0.1657837   | 0.2526632   | 0.1530353   | 0           |
| 0.179712234 | 0           | 0.8374023   | 0.5396702   | 0           | 0.3635480   |
| 0.2562317   | 0.3918611   | 0.1977944   | 0.6624610   | 0.07810203  | 0.1792412   |
| 0.123670049 | 0.03781918  | 0.6889004   | 0.2648715   | 0.101778109 | 0.4164123   |
| 0.2392944   | 0.3883629   | 0.303216611 | 0.8375216   | 0.3497363   | 0.3093997   |
| 0.6178346   | 0.03175801  | 0.1289877   | 0.1723521   | 0.1117550   | 0.1434879   |
| 0.2108504   | 0.131511018 | 0.1927635   | 0.1103167   | 0.08505246  | 0.104548    |
| 0.1721417   | 0.3649923   | 0.049090261 | 0           | 0.04058697  | 0.2888490   |
| 0.110292779 | 0.4483362   | 0.1891685   | 0.4237746   | 0.4011774   | 0           |
| 0.1405971   | 0.2469599   | 0.3613703   | 0.07705216  | 0.3543776   | 0.14913227  |
| 3.8012370   | 0.151525613 | 0.1488124   | 0.3646746   | 0.3209209   | 1.2976520   |
| 0.4293294   | 0.08746863  | 0.2840085   | 0.2576404   | 0.5326540   | 0.1991628   |
| 0.7328520   | 0.3087131   | 0.8029775   | 0.2575910   | 0.06133486  | 0.3467150   |
| 0.1901173   | 0.03687209  | 0.422621744 | 0.1108066   | 0.3154726   | 0.6075154   |
| 0.1555607   | 0           | 0.02977627  | 0.1573483   | 1.0951710   | 0.1423017   |
| 0.2376802   | 0.1026008   | 0.2363261   | 0.4924555   | 0.3028001   | 0.2284522   |
| 0.2385568   | 0.6371892   | 2.2191970   | 0.09884912  | 0.1680139   | 0.09503506  |
| 0.3011688   | 0           | 0.1833980   | 0.161196917 | 0.5634103   | 0.07106278  |
| 0.171885522 | 0.1930364   | 0.1301579   | 0.2751449   | 0.4541424   | 0.1155297   |
| 0.2065774   | 0.216164887 | 0.1556258   | 0.2291298   | 0.3954914   | 0.3004778   |
| 0.1335830   | 0.2148210   | 0.1003892   | 0.09508978  | 0.2050624   | 0.124773561 |
| 0.2257978   | 0.03894496  | 0.1002314   | 0.09180938  | 0.1571826   | 0.05782294  |
| 0.5380138   | 0.4106529   | 0.5167562   | 0.2711114   | 0.1166899   | 0.451043    |
| 0.1977068   | 0.1804046   | 0.1894303   | 0           | 0.1823382   | 0.5097028   |
| 0.188163622 | 0.4381921   | 0.05764711  | 0.03852595  | 0.05722504  | 0.2443292   |
| 0.1316955   |             |             |             |             |             |



|             |             |             |             |             |             |
|-------------|-------------|-------------|-------------|-------------|-------------|
| 0.056898885 | 0.2600491   | 0.2463492   | 0.04515735  | 0.04836776  | 0.131572086 |
| 0.1171925   | 0.04243869  | 0.3902343   | 0.07083591  | 0.0895878   | 0.2490794   |
| 0.2584763   | 0.3106332   | 0.4273560   | 0.2902590   | 0.1134988   | 0.1703748   |
| 0.15954801  | 0.280860398 | 0.09919825  | 0.062695098 | 0.201986872 | 0.5775089   |
| 0.232625192 | 0.2851933   | 0.8906774   | 0.1213677   | 0.079057095 | 0.04570702  |
| 0.07660348  | 0.2606034   | 0.299163119 | 0.5377758   | 0.3901431   | 0.09170101  |
| 0.4279147   | 0.1376066   | 0.3636954   | 0.1915442   | 1.1435520   | 0.05099548  |
| 0.1237436   | 0.2451697   | 0.329354702 | 0.05503145  | 0.1893046   | 0.2480537   |
| 0.1281928   | 0.39042     | 0.4530362   | 0.03940968  | 0.3065851   | 0.1647545   |
| 0.06401121  | 0           | 0.145037505 | 0.2997992   | 0.3976645   | 0.2386750   |
| 0.3227624   | 0.02843877  | 0.10992     | 0.5210317   | 0.3946276   | 0.3431827   |
| 0.07268587  | 0.1996186   | 0.1124036   | 0.1620310   | 0.109388864 | 0.1973761   |
| 0.3863429   | 0           | 0.1902736   | 0.1915937   | 0.2875360   | 0.1601325   |
| 0.0362901   | 0           | 0.319132183 | 0.039709771 | 0.6872177   | 0.1170534   |
| 0.1301624   | 0.0723317   | 0.3106380   | 0.5410921   | 0.0328442   | 2.2094340   |
| 0.6806603   | 0.1138709   | 0.2102359   | 1.0056680   | 0.7399064   | 0.4583189   |
| 0.09037405  | 0.324095541 | 0.3436946   | 0.06641876  | 0.3309191   | 0.1475559   |
| 0.03978841  | 0.2617      | 0.8706457   | 0           | 0.2801477   | 0.08042789  |
| 0.17084891  | 0.1377681   | 0.1576407   | 0.2962485   | 0.1160631   | 0.09790924  |
| 0.15124904  | 0.6504375   | 0.1399289   | 1.2305470   | 0.08127381  | 0.3532877   |
| 0.2840981   | 0.268049307 | 0.3930065   | 0.9399168   | 0.06002116  | 0.2460059   |
| 0.122522781 | 0.4939108   | 0.09496069  | 0.1641433   | 0.041616819 | 0.197251702 |
| 0.2983712   | 0.02178941  | 0.09908204  | 0.2754781   | 0.2122127   | 0           |
| 0.2090835   | 0.1106697   | 0           | 0.1252538   | 0.1989394   | 0.433831988 |
| 5.2480470   | 0.1581499   | 0.8175409   | 0.06101526  | 0.06040383  | 0.1901809   |
| 0.04961085  | 0.2949967   | 0.2457113   | 0.1656920   | 0.2648723   | 0.3393683   |
| 0.1211012   | 0.1219808   | 0.1939099   | 0.6641644   | 0           | 0.1688957   |
| 0.3965407   | 0.3034408   | 0.1193347   | 0.1661592   | 0.2154493   | 0.327834    |
| 0.1652741   | 0.03891058  | 0.1100001   | 0.2554750   | 0.1690538   | 0.1190121   |
| 0.4868441   | 0.1692324   | 0           | 0.2763932   | 0.2215610   | 0.2285477   |
| 0.5332452   | 0.1199022   | 0.1474979   | 0.5810370   | 0.03790654  | 0.2960329   |
| 0.3244025   | 0.192934079 | 0.3322223   | 0.06255439  | 0.3287398   | 0.09675566  |
| 0.2154296   | 0.168926592 | 0.029723595 | 0.03437637  | 0.039374694 | 0.1244056   |
| 0.3628317   | 0           | 0.1376328   | 0.5548438   | 0.06615904  | 0.2781905   |
| 0.1225161   | 0.1936285   | 0.2046517   | 0.10743181  | 0.1252132   | 0.3131179   |
| 0.1471609   | 0.1478326   | 0.1915055   | 0.2532114   | 0.1391008   | 0.4656455   |
| 0.2561402   | 0.225308    |             |             |             |             |
| AC078795.1  | 0.02355471  | 0.01936808  | 0.04359934  | 0.020138186 | 0.004974895 |
| 0.09503413  | 0.06932033  | 0.02217384  | 0.0166517   | 0.02455718  | 0.03581843  |
| 0.040131596 | 0.1483331   | 0.033767494 | 0.008646701 | 0.09123367  | 0.05923285  |
| 0.03621609  | 0           | 0.2008755   | 0.060004878 | 0.1143506   | 0.3360732   |
| 0.1855034   | 0.1585110   | 0.1397331   | 0.3917633   | 0.07119184  | 0.026142587 |
| 0.07730778  | 0.134029185 | 0.01658369  | 0.0806284   | 0.1032601   | 0.051274974 |
| 0.1410673   | 0.08494211  | 0.3403129   | 0.03250051  | 0.03900738  | 0           |
|             |             |             |             |             | 0.1573976   |

|             |             |             |             |             |             |            |
|-------------|-------------|-------------|-------------|-------------|-------------|------------|
| 0.2847528   | 0.04584841  | 0.4190080   | 0.1241930   | 0.07478457  | 0.0722984   | 0.06920403 |
| 0.09228678  | 0.09981624  | 0.08407701  | 0.118778942 | 0.01486519  | 0.2684133   |            |
| 0.1900779   | 0.1117429   | 0.06576174  | 0.06876014  | 0.1635768   | 0.05504427  |            |
| 0.08449674  | 0.08965705  | 0.1720898   | 0.146268786 | 0           | 0.2982223   | 0.1174772  |
| 0.09913354  | 0.1665826   | 0.06659333  | 0.3416026   | 0.126573399 | 0.2709488   |            |
| 0.1297710   | 0.05022673  | 0.2659657   | 0.2319962   | 0.1346102   | 0.1151134   |            |
| 0.05831316  | 0.02246136  | 0.05601047  | 0           | 0.08493669  | 0.06447018  | 0.1538503  |
| 0.007273674 | 0.1167693   | 0.07618038  | 0.046107047 | 0.08557668  | 0.02117805  |            |
| 0.4488101   | 0.149630419 | 0.2058666   | 0.0236897   | 0.1277601   | 0.04884416  |            |
| 0.07265234  | 0.05869025  | 0.2663154   | 0.1714191   | 0.02144288  | 0.1047836   |            |
| 0.067440874 | 3.87359     | 0.063252181 | 0.04141306  | 0.3721133   | 0.06140008  |            |
| 0.07738373  | 0.1980823   | 0.02738439  | 0.05186792  | 0           | 0.1504124   | 0.09501445 |
| 0.04025243  | 0.03323498  | 0.1002305   | 0.1967428   | 0.2240160   | 0.1621546   |            |
| 0.0361828   | 0           | 0.0769586   | 0.039203855 | 0.05550554  | 0.1426636   | 0.05283303 |
| 0.08441756  | 0.024269641 | 0.1553709   | 0.08210349  | 0.08421433  | 0.1069232   | 0          |
| 0.03212191  | 0.1726391   | 0.1713070   | 0.1760565   | 0.1021758   | 0.07824306  |            |
| 0.0237487   | 2.4559620   | 0.00687719  | 0.04208098  | 0.05950652  | 0.06769461  |            |
| 0.007114295 | 0.2220148   | 0.218690314 | 0.0534517   | 0.1557367   | 0.113605958 |            |
| 0.1007253   | 0.0814988   | 0.02871382  | 0.1150992   | 0.1044901   | 0.114977    |            |
| 0.109570966 | 0.1218071   | 0.2072350   | 0.1155645   | 0.1977937   | 0.01394058  |            |
| 0.1601320   | 0.1388136   | 0.006615643 | 0.03745015  | 0.112850666 | 0.05655362  |            |
| 0.03251402  | 0.2510410   | 0.08303642  | 0.3561882   | 0.1146524   | 0.3244021   |            |
| 0.2657028   | 0.06591213  | 0.04951255  | 0.03044406  | 0.1305822   | 0.05501991  |            |
| 0.06777655  | 0.0621303   | 0.07269629  | 0.07611444  | 0.5482870   | 0.065455158 |            |
| 0.1067016   | 0.09625582  | 0.04020526  | 0.1731863   | 0.1311322   | 0.2144001   |            |
| 0.029689523 | 0.1356922   | 0.05141746  | 0.08953884  | 0.08076169  | 0.068653586 |            |
| 0.1589910   | 0.02657313  | 0.1777066   | 0.1330624   | 0.2617799   | 0.4158985   |            |
| 0.07417932  | 0.05402889  | 0.40544     | 0.06058221  | 0.6790907   | 0.02540018  |            |
| 0.1220049   | 0.144302199 | 0.063505607 | 0.18634     | 0.052342328 | 0.042158253 |            |
| 0.03348233  | 0.064737353 | 0.06613879  | 0.1766052   | 0.1266580   | 0.057752176 |            |
| 0.1717176   | 0.1172491   | 0.1794955   | 0.178401896 | 0.06734602  | 0.03489849  |            |
| 0.1084579   | 0.5074626   | 0.1340310   | 0.3036388   | 0.1998934   | 0.4722808   |            |
| 0.02128733  | 0.1601305   | 0.03721547  | 0.116861713 | 0.1378325   | 0.052681649 |            |
| 0.1035464   | 0.1426993   | 0.06231404  | 0.008596065 | 0.2138630   | 0.2734108   |            |
| 0.05158078  | 0.00668014  | 0.3872634   | 0.060543814 | 0.1308354   | 0.1493994   |            |
| 0.2490786   | 0.3889894   | 0.05613854  | 0.0534211   | 0.07647421  | 0.2392469   |            |
| 0.07778993  | 0.5252745   | 0.03034167  | 0.04166396  | 0.03519093  | 0.006763748 |            |
| 0.188359063 | 0.1098557   | 0.04031832  | 0.1331372   | 0.03530088  | 0.1679538   |            |
| 0.03000694  | 0.05347599  | 0.1129307   | 0.1060414   | 0.1222088   | 0.146538838 |            |
| 0.116033896 | 0.1489513   | 0.04886224  | 0.09620323  | 0.1833786   | 0.04529073  |            |
| 0.02593427  | 0.05646777  | 0.006855168 | 0.4611482   | 0.04070558  | 0.1587795   |            |
| 0.1045743   | 0.07800885  | 0.1705443   | 0.2801318   | 0.07358407  | 0.4155135   |            |
| 0.06287557  | 0.116840506 | 0.2086841   | 0.1109022   | 0.06446413  | 0.01539877  |            |
| 0.008304548 | 0.04779376  | 0.3921310   | 0.07171424  | 0.3800668   | 0.1510806   |            |

|             |             |             |             |             |                       |
|-------------|-------------|-------------|-------------|-------------|-----------------------|
| 0.2119082   | 0.071318412 | 0.01437732  | 0.2632194   | 0.2009551   | 0.07267332            |
| 0.0272472   | 0.117253926 | 0.08060623  | 0.07788173  | 0.6394720   | 0.08481645            |
| 0.04424246  | 0.06917904  | 0.043514067 | 0.1054639   | 0.2382154   | 0.04384619            |
| 0.07935262  | 0.086947124 | 0.0103088   | 0.04954996  | 0.02569472  | 0.121606384           |
| 0.178403066 | 0.04843641  | 0.1318873   | 0.01378679  | 0.1437430   | 0.1919344 0           |
| 0.2157223   | 0.04987365  | 0.08662025  | 0.06325764  | 0.05664249  | 0.1127031             |
| 0.09620773  | 0.03605432  | 4.1012340   | 0.1650435   | 0.1455419   | 0.02546994            |
| 0.1260735   | 0.5358710   | 0.02588667  | 0.3181171   | 0.2222320   | 0.2074972 0.04299832  |
| 0.4486039   | 0.07582794  | 0.0424326   | 0.04047245  | 0.1172963   | 0.008865977           |
| 1.1774020   | 0.3106899   | 0.07448859  | 0.1669701   | 0.01660485  | 0.1734019             |
| 0.05995746  | 0.05131858  | 0.3277086   | 0.03248532  | 0.05739746  | 0.3412619             |
| 0.3763683   | 0.3394793   | 0.1930647   | 0.04709575  | 0.05042139  | 0.04807347            |
| 0.2959598   | 0.3748013   | 0.06977335  | 0.01788284  | 0.2618771   | 0.08133361            |
| 0.02565453  | 0.1854760   | 0.03955885  | 0.4187809   | 0.05539792  | 0.010067193           |
| 0.1294360   | 0.02611243  | 0.1509504   | 0           | 0.0349720   | 0.064639638 0.0434269 |
| 0.0358748   | 0.057527392 | 0           | 0.1211671   | 0.46828     | 0.1969811 0.1250702   |
| 0.06904284  | 0.1741899   | 0.009170205 | 0.0575354   | 0.04618709  | 0.3173073             |
| 0.061663056 | 0.02613422  | 0.6099638   | 0.3609023   | 0.02057019  | 0.4596619             |
| 0.06870464  | 0.1548416   | 0.4095801   | 0.01527458  | 0.1672028   |                       |
| AC007390.1  | 0.1557348   | 0.2320986   | 0.1171066   | 0.066573042 | 0.156237595           |
| 0.2114571   | 0.1846010   | 0.2504503   | 0.1720230   | 0.2367790   | 0.1998151 0.172467724 |
| 0.2926349   | 0.184187783 | 0.214382708 | 0.3644349   | 0.2998380   | 0.1721026             |
| 0.0691732   | 0.4942694   | 0.429790397 | 0.3712710   | 0.4370457   | 0.2330989             |
| 0.4810757   | 0.3526972   | 0.3175778   | 0.3885287   | 0.1699727   | 0.102626666           |
| 0.2015031   | 0.406152251 | 0.1964474   | 0.1947809   | 0.2363251   | 0.20340646            |
| 0.3815524   | 0.2262021   | 0.3716552   | 0.09401047  | 0.2256643   | 0.1993968             |
| 0.2508718   | 0.9637518   | 0.1667228   | 0.3095626   | 0.1319653   | 0.3152102             |
| 0.2629053   | 0.2287755   | 0.1797809   | 0.1418887   | 0.09727996  | 0.273829211           |
| 0.2211368   | 0.4900916   | 0.4770895   | 0.2047765   | 0.3971656   | 0.3030774             |
| 0.7360261   | 0.1649066   | 0.2285429   | 0.3098615   | 0.2411626   | 0.526202019           |
| 0.06523634  | 0.6205679   | 0.3883575   | 0.152154214 | 0.1735872   | 0.1788678             |
| 0.2583931   | 0.241903549 | 0.3864536   | 0.1675775   | 0.3320802   | 0.4262945             |
| 0.4108583   | 0.2224979   | 0.3686513   | 0.3084357   | 0.01856325  | 0.208305              |
| 0.0831785   | 0.2179776   | 0.1712622   | 0.2053962   | 0.1743291   | 0.289513              |
| 0.3002683   | 0.160889037 | 0.1768127   | 0.1365208   | 0.3875287   | 0.304399949           |
| 0.5645523   | 0.1174705   | 0.3167631   | 0.4844087   | 0.1921399   | 0.3783368             |
| 0.3691952   | 0.2890064   | 0.1373418   | 0.2343260   | 0.287258372 | 4.5641580 0.078412413 |
| 0.2053556   | 0.4403328   | 0.1107148   | 0.3357585   | 0.3235136   | 0.3545665             |
| 0.09798031  | 0.03809296  | 0.2648316   | 0.3828092   | 0.5588811   | 0.2472043             |
| 0.1834221   | 0.4335963   | 0.3295467   | 0.5713190   | 0.2691304   | 0.1585061             |
| 0.2607709   | 0.226800952 | 0.1758454   | 0.2630183   | 0.1135264   | 0.1717345             |
| 0.140403987 | 0.1900419   | 0.2714187   | 0.1491411   | 0.1963711   | 0.1288532             |
| 0.3451141   | 0.4239577   | 0.2548389   | 0.2051957   | 0.2026643   | 0.1645998             |
| 0.1884209   | 2.8576560   | 0.1364081   | 0.2376493   | 0.3770415   | 0.1398660 0.09407406  |

|                   |                   |                   |                   |                           |             |
|-------------------|-------------------|-------------------|-------------------|---------------------------|-------------|
| 0.5694355         | 0.25720297        | 0.1590311         | 0.4045141         | 0.143305731               | 0.3718264   |
| 0.2806455         | 0.2610368         | 0.2294169         | 0.3122107         | 0.3325808                 | 0.22372469  |
| 0.3489817         | 0.5072226         | 0.1227968         | 0.5143234         | 0.2477064                 | 0.1958655   |
| 0.3030417         | 0.1257529         | 0.1591754         | 0.150660056       | 0.3115927                 | 0.1477922   |
| 0.2204406         | 0.04751009        | 0.4221925         | 0.3141870.5980761 | 0.4250144                 |             |
| 0.1634198         | 0.2922842         | 0.1559956         | 0.2735648         | 0.1932533                 | 0.2365041   |
| 0.1447073         | 0.3004003         | 0.09435749        | 0.3516855         | 0.183925034               | 0.5165052   |
| 0.5966317         | 0.1860754         | 0.4590041         | 0.1746035         | 0.3271230.161944132       |             |
| 0.3364296         | 0.2185411         | 0.1557887         | 0.1835508         | 0.090782318               | 0.1246602   |
| 0.4172673         | 0.2692545         | 0.2728881         | 0.2318023         | 0.3554382                 | 0.1616241   |
| 0.3334040.7103633 | 0.60082           | 0.4176643         | 0.3190791         | 0.3499439                 | 0.275212976 |
| 0.109006034       | 0.5732266         | 0.156811931       | 0.121946321       | 0.1272892                 | 0.147131509 |
| 0.2678369         | 0.3533668         | 0.5778161         | 0.320469148       | 0.6386243                 | 0.2334429   |
| 0.1618304         | 0.626623173       | 0.3246735         | 0.4230153         | 0.3479960.3556460.3085745 |             |
| 0.5646221         | 0.22027           | 0.9988778         | 0.2199121         | 0.2262592                 | 0.2806561   |
| 0.460178582       | 0.2847802         | 0.136059051       | 0.3656440.1474178 | 0.0911147                 |             |
| 0.2273357         | 0.2787175         | 0.6682679         | 0.8454768         | 0.1214580.5108569         |             |
| 0.265194004       | 0.3525954         | 0.6722340.1963509 | 0.4193236         | 0.1577459                 |             |
| 0.2403723         | 0.2148879         | 0.7968967         | 0.2117778         | 0.6182844                 | 0.1441867   |
| 0.1779053         | 0.1454182         | 0.1117984         | 0.462292356       | 0.3631624                 | 0.2332483   |
| 0.3150906         | 0.1932811         | 0.5816628         | 0.2169941         | 0.2541235                 | 0.343631    |
| 0.4131517         | 0.2146247         | 0.352312532       | 0.239741347       | 0.2963547                 | 0.2927719   |
| 0.1284351         | 0.4939530.1497226 | 0.1500341         | 0.3150087         | 0.03965831                |             |
| 0.7173970.2691299 | 0.4765496         | 0.2671341         | 0.2578825         | 0.3794723                 |             |
| 0.6915789         | 0.1641972         | 0.2805848         | 0.1662838         | 0.193126327               | 0.8677276   |
| 0.1374832         | 0.2473555         | 0.08908447        | 0.1166764         | 0.3103515                 | 0.9564246   |
| 0.08466919        | 0.3431018         | 0.3676462         | 0.3424806         | 0.265235857               | 0.09505744  |
| 0.2447307         | 0.2171814         | 0.1451476         | 0.1407408         | 0.324258488               | 0.2033579   |
| 0.1448225         | 0.5068339         | 0.1331839         | 0.08531671        | 0.2368604                 | 0.200361512 |
| 0.1743218         | 0.8569799         | 0.1656540.1697396 | 0.219800006       | 0.2641118                 |             |
| 0.2047535         | 0.2406687         | 0.258433552       | 0.2098209         | 0.1458250.2480658         |             |
| 0.1652149         | 0.2851123         | 0.4270667         | 0.1776191         | 0.3934550.1597206         |             |
| 0.1479476         | 0.2287226         | 0.2520665         | 0.3284544         | 0.130959538               | 0.1013105   |
| 7.2105320.3478216 | 0.2530101         | 0.1947098         | 0.2813233         | 0.3881965                 |             |
| 0.1155282         | 0.2289851         | 0.4026486         | 0.4144261         | 0.1269146                 | 0.1678131   |
| 0.2924516         | 0.4909595         | 0.1638980.3304768 | 0.1465462         | 0.6292887                 |             |
| 0.3518708         | 0.47197           | 0.3663950.1646775 | 0.2694199         | 0.08671602                | 0.09896224  |
| 0.5773077         | 0.1006784         | 0.2561560.3128846 | 0.2673091         | 0.2326625                 |             |
| 0.5248648         | 0.04378772        | 0.2416912         | 0.3019515         | 0.5579865                 | 0.416762    |
| 0.3363756         | 0.06650696        | 0.5681262         | 0.1344368         | 0.1653776                 | 0.6544182   |
| 0.4184771         | 0.6354671         | 0.4069668         | 0.224641625       | 0.2712522                 | 0.1834359   |
| 0.3459072         | 0.05841467        | 0.1156108         | 0.223399458       | 0.112798032               | 0.1304548   |
| 0.169798837       | 0.07868446        | 0.8824739         | 0.2902585         | 0.4171637                 | 0.3407205   |
| 0.1654759         | 0.1919464         | 0.09852364        | 0.2403931         | 0.1431429                 | 0.4034454   |

|            |                    |                   |                   |                  |             |                   |             |
|------------|--------------------|-------------------|-------------------|------------------|-------------|-------------------|-------------|
|            | 0.15751769         | 0.21598706901455  | 0.1903843         | 0.07650132       | 0.5161533   |                   |             |
|            | 0.25769903519156   | 0.8319034         | 0.1893557         | 0.4706934        |             |                   |             |
| AL139021.3 | 0.111327007628303  | 0                 | 0                 | 0.156752823      | 0.1151696   | 0.1213444         | 0           |
|            | 0.06558432         | 0                 | 0.07053716        | 0                | 0.07538376  | 0.053198613       | 0           |
|            | 0                  | 0                 | 0.1438487         | 0.078778334      | 0.06434011  | 0.3114487         | 0.04039531  |
|            | 0.1511634          | 0.1920956         | 0.1179327         | 0.5014742        | 0.06231021  | 0                 | 0.09368743  |
|            | 0.234616391        | 0.04354431        | 0.3419906         | 0.06256922       | 0.040390286 | 0.5050974         |             |
|            | 0.07434505         | 0.7659173         | 0                 | 0                | 0           | 0.2136241         | 0.1444627   |
|            | 0                  | 0                 | 0.1518689         | 0                | 0.05192577  | 0.03145087        | 0.06622909  |
|            | 0.17564402458539   | 0.1109097         | 0.07654087        | 0.03984753       | 0.1805456   |                   |             |
|            | 0.2863391          | 0.2167972         | 0.2420353         | 0                | 0           | 0.067775733       | 0           |
|            | 0.4354780055778145 | 0.1141046         | 0.1311421         | 0.09121592       | 0.062315193 |                   |             |
|            | 0.03442445         | 0                 | 0.1130416         | 0.06348677       | 0.1044273   | 0.07069002        | 0.05667317  |
|            | 0.0918688          | 0.05897749        | 0.03151466        | 0.072072872      | 0.1760691   | 0.07254916        | 0           |
|            | 0.05729614         | 0.07075497        | 0                 | 0                | 0.0421315   | 0.03336472        | 0.2638331   |
|            | 0.090666745        | 0.07371141        | 0                 | 0.1548294        | 0           | 0.0381531         | 0.04623144  |
|            | 0.2160482          | 0.1266823         | 0.04855299        | 0.163459932      | 3.0635560   | 0                 | 0.2664735   |
|            | 0.04396912         | 0.1523917         | 0.03715078        | 0.1438081        | 0.05836766  | 0                 | 0.05151423  |
|            | 0.1871118          | 0.06341523        | 0.1745322         | 0.1127907        | 0.2869964   | 0.3529234         |             |
|            | 0.06722751         | 0.05700377        | 0                 | 0.06062178       | 0.077204084 | 0                 | 0.1728906   |
|            | 0.08323519         | 0                 | 0                 | 0.1468664        | 0.06467451  | 0                 | 0           |
|            | 0.03885462         | 0.2024128         | 0.1066793         | 0.1073145        | 0.05603052  | 0.03741462        |             |
|            | 0.6788101          | 0                 | 0.05524667        | 0.07812406       | 0.03808882  | 0                 | 0.06030529  |
|            | 0.05841753         | 0.188399169       | 0.21158203209909  | 0                | 0.05333287  | 0.126629          |             |
|            | 0.3396360101542546 | 0.127933006278578 | 0                 | 0.3800144        | 0.2196252   |                   |             |
|            | 0.05045564         | 0.1031568         | 0                 | 0.1685726        | 0.068380498 | 0.0742473         | 0           |
|            | 0.1235936          | 0.05031491        | 0.1107538         | 0.0950673        | 0.2948513   | 0.2025476         |             |
|            | 0.09440047         | 0.1114343         | 0.0959255         | 0.09568573       | 0           | 0.177963008898407 | 0           |
|            | 0                  | 0.3223106         | 0.051560291       | 0.2401454        | 0.09477821  | 0                 | 0.2352107   |
|            | 0.1147726          | 0                 | 0.046774021       | 0.05344368       | 0.05786076  | 0.03712183        | 0           |
|            | 0.09633868         | 0                 | 0.05832621        | 0.03882068       | 0.04909741  | 0.1861427         | 0.1593613   |
|            | 0.02837307         | 0.4471221         | 0                 | 0.1866045        | 0.2000821   | 0                 | 0.087438174 |
|            | 0.038480456        | 0.1630929         | 0.103077655       | 0                | 0.05274935  | 0.063743578       | 0.260494    |
|            | 0.2928744          | 0.1596335         | 0                 | 0.1502948        | 0.04198152  | 0.1713843         | 0.351326541 |
|            | 0.08841627         | 0.2749021         | 0.100511009593713 | 0.07541345       | 0.1630787   | 0                 | 0           |
|            | 0                  | 0.08137928        | 0.2198651         | 0.10829909       | 0.1809556   | 0.155618819       | 0.2224514   |
|            | 0.1053815          | 0.03775844        | 0                 | 0                | 0.09164721  | 0.2708745         | 0           |
|            | 0.143074592        | 0.1792375         | 0.06538043        | 0.0905557        | 0.4440790   | 0.04675648        |             |
|            | 0.1204804          | 0.05710891        | 0                 | 0.50153801195036 | 0.1093983   | 0                 | 0           |
|            | 0.044961839        | 0.03605645        | 0.6351904         | 0                | 0           | 0.3150011         | 0.3545557   |
|            | 0.05265509         | 0.2021765         | 0.2386597         | 0.1804992        | 0.262344251 | 0                 | 0.1303687   |
|            | 0.09622432         | 0.1165864         | 0.05350032        | 0.2973032        | 0           | 0.05560094        | 0           |
|            | 0.2670995          | 0.1068819         | 0.3949696         | 0.1123298        | 0           | 0.1033393         | 0.1414521   |
|            | 0.1159272          | 0.1995781         | 0.0990566         | 0.145322403      | 0.3595912   | 0                 | 0.1450847   |

|             |             |             |             |             |             |             |             |
|-------------|-------------|-------------|-------------|-------------|-------------|-------------|-------------|
| 0           | 0           | 0           | 0.3013553   | 0.08070098  | 0.1842375   | 0.1322323   | 0.4080369   |
| 0.040127778 | 0.05662648  | 0.08639292  | 0.06088314  | 0.04770515  | 0           | 0.1065729   |             |
| 0.1336739   | 0           | 0.2477333   | 0.1336231   | 0           | 0.1556962   | 0.048966958 |             |
| 0.1846132   | 0.2759512   | 0.0986814   | 0.03676917  | 0           | 0           | 0           | 0.136845279 |
| 0.054050592 | 0.05450613  | 0.1432968   | 0.1086012   | 0.05661456  | 0.05815018  | 0           |             |
| 0           | 0           | 0.04548829  | 0.06228658  | 0.03432184  | 0.1401764   | 0.13373768  | 0           |
| 0.7023090   | 0.1300079   | 0.1185995   | 0.2507895   | 0.2979317   | 0           | 0.04078285  | 0           |
| 0.4039764   | 0.1816106   | 0           | 0.1487890   | 0.06684995  | 0.1594046   | 0.1679938   |             |
| 0           | 0.4442932   | 0           | 0.2607826   | 0.09070729  | 0           | 0           | 0.05903706  |
| 0.4755255   | 0           | 0           | 0.4620319   | 0.1389715   | 0.1304460   | 0.04002127  | 0.04637279  |
| 0.1191537   | 0           | 0.2914166   | 0.1610390   | 0.04580151  | 0.1408666   | 0.5672854   |             |
| 0.1971325   | 0.2020857   | 0.05619346  | 0           | 0.05407898  | 0.1939467   | 0           |             |
| 0.0364140   | 0.05404845  | 0           | 0.03935446  | 0.092577982 | 0           | 0           | 0.1363577   |
| 0.05965353  | 0           | 0.4525670   | 0.03648898  | 0.1631591   | 0.1372128   | 0           | 0.1510725   |
| 0           | 0.2884028   | 0.044157436 | 0           | 0.5720003   | 0.3629230   | 0.5116412   |             |
| 0.3746767   | 0.07623234  | 0.2187350   | 0.2469541   |             |             |             |             |
| LAMTOR5-AS1 | 0.07571891  | 0.05660052  | 0.0557432   | 0.044138298 | 0.027623039 |             |             |
| 0.04059045  | 0.1080422   | 0.03887999  | 0.0340636   | 0.03109815  | 0.06018778  |             |             |
| 0.056293939 | 0.0741116   | 0.067102965 | 0.042956939 | 0.03332722  | 0.0865499   |             |             |
| 0.09260694  | 0.03974725  | 0.08938881  | 0.099368376 | 0.2291477   | 0.1169887   |             |             |
| 0.05245193  | 0.1252457   | 0.1140250   | 0.1254220   | 0.1402471   | 0.2219182   | 0.064938379 |             |
| 0.07820352  | 0.181334147 | 0.07754166  | 0.1993753   | 0.04410388  | 0.061436048 |             |             |
| 0.1667737   | 0.06067883  | 0.2379738   | 0.1614630   | 0.09575468  | 0.05242852  |             |             |
| 0.1774180   | 0.08717768  | 0.03483627  | 0.1057517   | 0.07950048  | 0.1442414   |             |             |
| 0.1422633   | 0.04044784  | 0.05779186  | 0.09217693  | 0.06879696  | 0.076730691 |             |             |
| 0.1064316   | 0.1970123   | 0.1728149   | 0.07950856  | 0.07835014  | 0.1428921   |             |             |
| 0.1619992   | 0.1286874   | 0.05836528  | 0.1714977   | 0.1311936   | 0.213725148 |             |             |
| 0.03690842  | 0.2256598   | 0.07674009  | 0.055871497 | 0.08889657  | 0.07784392  |             |             |
| 0.1032127   | 0.161828298 | 0.1200487   | 0.05214519  | 0.1258120   | 0.2002002   |             |             |
| 0.1491549   | 0.1101463   | 0.1093310   | 0.03749067  | 0.05470018  | 0.1426379   |             |             |
| 0.016042999 | 0.04703035  | 0.05248431  | 0.1175893   | 0.1126584   | 0.3950535   |             |             |
| 0.07363804  | 0.05838797  | 0.1813124   | 0.1213043   | 0.2701475   | 0.127818614 |             |             |
| 0.1668119   | 0.02538429  | 0.08616029  | 0.08972248  | 0.07784935  | 0.07032079  |             |             |
| 0.1631856   | 0.08616317  | 0.06893022  | 0.08105709  | 0.09399516  | 3.255077    |             |             |
| 0.10351362  | 0.1422031   | 0.08897315  | 0.05219876  | 0.04240186  | 0.1516083   |             |             |
| 0.1093704   | 0.01948845  | 0.1122482   | 0.07453398  | 0.1318916   | 0.1152795   |             |             |
| 0.1035996   | 0.06904304  | 0.09369613  | 0.2042526   | 0.1982790   | 0.05286961  |             |             |
| 0.09276948  | 0.09220936  | 0.148938199 | 0.09597263  | 0.05612314  | 0.06484683  |             |             |
| 0.06452119  | 0.049647268 | 0.3886668   | 0.05758467  | 0.1371155   | 0.1666498   |             |             |
| 0.1429018   | 0.2503249   | 0.1600030   | 0.3454286   | 0.09498477  | 0.1592505   |             |             |
| 0.0644390   | 0.06940229  | 1.0828770   | 0.07034172  | 0.1250255   | 0.04637322  | 0.05652232  |             |
| 0.07484595  | 0.08725343  | 0.056535079 | 0.0749785   | 0.09319103  | 0.094357241 |             |             |
| 0.1197047   | 0.1548098   | 0.07761875  | 0.1009085   | 0.1714702   | 0.05460072  |             |             |
| 0.111130315 | 0.07119286  | 0.1304403   | 0.1905713   | 0.1466209   | 0.06722002  |             |             |

|             |             |             |             |             |             |
|-------------|-------------|-------------|-------------|-------------|-------------|
| 0.2040322   | 0.1706849   | 0.07926654  | 0.06097532  | 0.045663295 | 0.1156891   |
| 0.1377757   | 0.1589537   | 0.03546605  | 0.08628602  | 0.09346295  | 0.2789368   |
| 0.1152195   | 0.07704763  | 0.08268205  | 0.09430667  | 0.1135951   | 0.08039404  |
| 0.07482553  | 0.04291589  | 0.07170014  | 0.1912932   | 0.1123996   | 0.107118841 |
| 0.1447738   | 0.3990863   | 0.08224601  | 0.07853478  | 0.1277386   | 0.2345564   |
| 0.045117033 | 0.1506858   | 0.0665439   | 0.05508734  | 0.1150573   | 0.040126122 |
| 0.06195056  | 0.1087188   | 0.1038646   | 0.2822811   | 0.1475387   | 0.1091103   |
| 0.07291651  | 0.03684146  | 0.1232236   | 0.02065503  | 0.1407645   | 0.106889    |
| 0.08598966  | 0.068121289 | 0.112779399 | 0.1845429   | 0.172083616 | 0.094454608 |
| 0.08610578  | 0.089863331 | 0.0657157   | 0.1032209   | 0.1362117   | 0.072331177 |
| 0.1616979   | 0.07320126  | 0.09696239  | 0.135552265 | 0.09512456  | 0.1053855   |
| 0.1528833   | 0.2443966   | 0.1930458   | 0.1371347   | 0.1207266   | 0.08310733  |
| 0.05909881  | 0.1101968   | 0.1128354   | 0.086382496 | 0.1174823   | 0.128937173 |
| 0.1430473   | 0.1159834   | 0.07144087  | 0.2386477   | 0.07692124  | 0.05270034  |
| 0.04773361  | 0.05466099  | 0.08705567  | 0.074310987 | 0.07314488  | 0.07034096  |
| 0.1153438   | 0.1614540   | 0.05577942  | 0.1006079   | 0.09162897  | 0.1970377   |
| 0.05616396  | 0.2395596   | 0.2039395   | 0.0710250   | 0.0479923   | 0.07115803  |
| 0.120098904 | 0.1029998   | 0.08640479  | 0.1149540   | 0.1108991   | 0.2313874   |
| 0.07672975  | 0.08985881  | 0.07500552  | 0.5223884   | 0.1874977   | 0.105113328 |
| 0.06539651  | 0.3659656   | 0.1499328   | 0.06271599  | 0.2282531   | 0.1235322   |
| 0.04547359  | 0.1144821   | 0.1302163   | 0.3745651   | 0.1229216   | 0.04395896  |
| 0.1611366   | 0.1781016   | 0.0575068   | 0.07451781  | 0.03225589  | 0.0977348   |
| 0.09003513  | 0.118609024 | 0.1867667   | 0.06076807  | 0.07266375  | 0.03150053  |
| 0.0679529   | 0.06384944  | 1.0145840   | 0.08981783  | 0.07860286  | 0.06622681  |
| 0.1334876   | 0.041683639 | 0.07352755  | 0.06730695  | 0.03839799  | 0.07787184  |
| 0.04976636  | 0.122566267 | 0.07934672  | 0.07396954  | 0.1302011   | 0.1511972   |
| 0.1134901   | 0.1068593   | 0.128980469 | 0.06335296  | 0.1719904   | 0.1885407   |
| 0.1009434   | 0.053807494 | 0.1265293   | 0.1534911   | 0.1001190   | 0.21068829  |
| 0.13435002  | 0.1021173   | 0.08372969  | 0.07856547  | 0.06301034  | 0.08844991  |
| 0.04433411  | 0.1891256   | 0.1439270   | 0.07594071  | 0.05083697  | 0.09804461  |
| 0.2912229   | 0.160423042 | 0.07164735  | 1.0124220   | 0.1109328   | 0.1129314   |
| 0.1898026   | 0.1086876   | 0.1778677   | 0.06657218  | 0.1139575   | 0.06244637  |
| 0.1195920   | 0.04487738  | 0.1959574   | 0.07755883  | 0.4067311   | 0.03075153  |
| 0.08413746  | 0.07772877  | 0.1957338   | 0.0751019   | 0.07739825  | 0.1447015   |
| 0.07278807  | 0.06283613  | 0.1292228   | 0.07665208  | 0.1789355   | 0.09493386  |
| 0.1341889   | 0.0934960   | 0.1202998   | 0.06775189  | 0.1321428   | 0.07741734  |
| 0.04420486  | 0.08710261  | 0.08108452  | 0.2608817   | 0.09685391  | 0.04442111  |
| 0.1607129   | 0.07679094  | 0.09446449  | 0.3231320   | 0.30751     | 0.1986215   |
| 0.161809892 | 0.1458998   | 0.0972952   | 0.1343447   | 0.0295080   | 0.09928081  |
| 0.039497357 | 0.092462351 | 0.07338739  | 0.052836409 | 0.06829296  | 0.2368004   |
| 0.2736967   | 0.1427132   | 0.1069427   | 0.07263653  | 0.1136869   | 0.03751812  |
| 0.04296892  | 0.06748769  | 0.08202921  | 0.104844657 | 0.1349268   | 0.09973707  |
| 0.1952293   | 0.09017032  | 0.09490695  | 0.1374569   | 0.1597902   | 0.1298377   |
| 0.1629281   | 0.1175759   |             |             |             |             |

|             |             |             |             |             |             |             |            |            |             |
|-------------|-------------|-------------|-------------|-------------|-------------|-------------|------------|------------|-------------|
| AC087286.1  | 0.05213552  | 0           | 0           | 0.055716831 | 0.027528335 | 0           | 0          | 0.04089929 | 0           |
| 0           | 0           | 0.044413242 | 0.02647722  | 0           | 0           | 0           | 0.08194051 | 0.05009998 | 0           |
| 0.02526216  | 0           | 0           | 0           | 0           | 0           | 0           | 0.04377073 | 0          | 0.03290606  |
| 0.027468292 | 0           | 0           | 0           | 0.028372754 | 0           | 0.05222478  | 0          | 0          | 0           |
| 0           | 0.0351297   | 0           | 0           | 0           | 0.03647603  | 0.04418626  | 0.0465236  | 0          | 0           |
| 0.1036222   | 0           | 0.02688363  | 0           | 0           | 0.05028578  | 0           | 0          | 0          | 0           |
| 0           | 0.039182183 | 0           | 0           | 0           | 0           | 0           | 0.07335653 | 0.04965725 | 0           |
| 0           | 0           | 0           | 0           | 0           | 0           | 0           | 0          | 0          | 0.05177967  |
| 0           | 0           | 0           | 0.03247596  | 0.09507376  | 0           | 0           | 0          | 11.104530  | 0           |
| 0.04679706  | 0           | 0           | 0           | 0           | 0           | 0           | 0          | 0          | 0           |
| 0           | 0           | 0           | 0.03036239  | 0           | 0           | 0           | 0          | 0          | 0           |
| 0.04995898  | 0           | 0           | 0           | 15.914540   | 0           | 0           | 0          | 0          | 0           |
| 0.03715723  | 0           | 0           | 0           | 0           | 0           | 0           | 0.0441048  | 0          | 0.03856975  |
| 0.0144928   | 0           | 0.02960408  | 0           | 0           | 0           | 0           | 0.02593355 | 0          | 0.03452045  |
| 0           | 0           | 0           | 0           | 0           | 0.03125409  | 0           | 0          | 0.04528237 | 0           |
| 0           | 0.04031186  | 0           | 0           | 0           | 0           | 0.075978247 | 0.02255818 | 0          | 0           |
| 0           | 0.02615175  | 0.03731524  | 0           | 0           | 0           | 0.04369436  | 0          | 0          | 0.061422239 |
| 0           | 0           | 0           | 0           | 0           | 0.02803423  | 0           | 0          | 0          | 0.06210931  |
| 0.03530274  | 0           | 0.05297529  | 0           | 0           | 0           | 0.1177924   | 0          | 0.02574124 | 0           |
| 0           | 0           | 0           | 0           | 0.0475659   | 0           | 0           | 0.03696422 | 0          | 0           |
| 0           | 0           | 0           | 0           | 0.05064079  | 0           | 0           | 0          | 0          | 0           |
| 0           | 0           | 0           | 0           | 0.03685752  | 0.045861989 | 0           | 0          | 0.08189782 | 0.03758209  |
| 0.0358765   | 0.01952885  | 0           | 1.1632930   | 0           | 0.02630258  | 0.02697863  | 0          | 0          | 0           |
| 0           | 0.02803931  | 0           | 0.034027957 | 0           | 0.0767090   | 0           | 0          | 0          | 1.7993770   |
| 0           | 0.02605741  | 0           | 0           | 0           | 0           | 0.02495457  | 0.04695059 | 0          | 0           |
| 0           | 0           | 0           | 0           | 0.0387692   | 0           | 0           | 0          | 0          | 0.05743296  |
| 0.03814426  | 0           | 0           | 0           | 0           | 0.03195392  | 0           | 0          | 0          | 12.545120   |
| 0           | 0           | 0.03488108  | 0           | 0           | 0           | 0.03189377  | 0          | 0          | 0.02239523  |
| 0           | 0           | 0           | 0           | 0.03185934  | 0           | 0           | 0.0315521  | 0          | 0           |
| 0.06508173  | 0.09163374  | 0           | 0.03257525  | 0           | 0.05320244  | 0           | 0          | 0          | 0           |
| 0.1038590   | 0.03947393  | 0           | 0.03798858  | 0           | 0           | 0           | 0          | 0          | 0           |
| 0.068657317 | 0           | 0           | 0           | 2.5912040   | 0.02563222  | 0.03820451  | 0          | 0          | 0           |
| 0           | 0           | 0           | 0           | 0.04249011  | 0           | 0           | 0          | 0          | 0           |
| AC012645.4  | 0.1255970   | 0.02868702  | 0.04843286  | 0           | 0.206319808 | 0.06496606  |            |            |             |
| 0.0912656   | 0.1532663   | 0           | 0           | 0.4244197   | 0.023776363 | 0.1275698   |            |            |             |
| 0.180052987 | 0.02561412  | 0.04504358  | 0.4167304   | 0.4291316   | 0.03099266  |             |            |            |             |
| 0.5544817   | 0.414755679 | 0.5565025   | 0.33673     | 0.4557322   | 0.7011076   |             |            |            |             |
| 0.9571738   | 0.5174142   | 3.2929760   | 0.8904311   | 0.096802721 | 0.2113927   |             |            |            |             |
| 0.455854561 | 0.3111304   | 0.1469818   | 0.5882450   | 0.258216129 | 3.9698952   | 7.39906     |            |            |             |
| 0.9361011   | 0.1925525   | 0.1617722   | 0.1649328   | 1.0657351   | 0.0644460   | 0.05432669  |            |            |             |
| 1.8618410   | 0.3854159   | 0.1772275   | 0.1142237   | 0.5808420   | 0.5662895   | 0.2483759   |            |            |             |
| 0.3486858   | 0.129632199 | 0.6605272   | 0.1479294   | 0.6047765   | 0.01439199  |             |            |            |             |
| 2.1878210   | 0.2942162   | 1.48061     | 0.1426754   | 0.1592848   | 0.6277607   | 0.1773153   |            |            |             |
| 0.280365401 | 0.1169151   | 0.4417120   | 0.1023538   | 0.188783523 | 0.4291022   |             |            |            |             |



0.2959041 1.2520480.164039901 0.6343378 1.2733930.04251047 0.644621  
4.5554340.1063348 0.3196880.3454821 0.04435819 0.04740566 0.027103747  
0.2383654 0.05456572 0.3155198 0.2585616 0.5321627 0.9200356  
0.257989909 0.2059718 0.08783004 0.7738939 0.272769323 0.2494794  
0.11696 0.4366889 0.8681463 0.1434787 0.3303304 2.1885780.7312245  
0.3970014 0.6208010.092206191 2.7189132.791841565 1.5028040.6012606  
1.0251730.1146169 0.1397093 0.7030467 0.2633971 0.3641031  
0.1356072 1.1610280.8585263 0.3281732 0.2757048 0.1726848  
0.09290434 3.1475590.1071843 0.2546844 0.7067208 0.406467494  
0.2329341 0.1950519 0.1252058 0.3847233 0.431363698 0.441845  
0.7539670.4989362 0.3343352 0.5038424 0.3171824 1.0228180.3805971  
0.09360834 0.5649940.08428342 0.7738584 0.1595460.3870736 0.3116412  
0.4113110.2291791 1.2855550.5442823 0.099665578 0.3166799 1.142363  
0.106274178 0.6365409 0.1207119 0.4890889 0.08022551 1.0714530  
0.229116735 0.0721658 0.7083372 0.9781049 0.3143983 0.2064808  
0.2276924 0.2172418 0.07839007 0.1743320.154291152 3.6856330.07223721  
1.9521040.07568577 1.1800870.3575104 0.2402441 0.3046805 0.08875067  
0.1466710.2344795 0.5217623 0.2648514 0.3123158 0.2007803  
0.5652890.2705686 0.4121080.155118236 2.0545330.4098867 0.30966  
2.3174790.1942264 0.2768461 0.2638478 0.2612746 1.3925850.2094007  
0.1794303 1.016862495 0.1811458 1.0495680.1754734 0.6423524  
0.3323446 0.3080040.07990596 0.09602986 1.1289732.0937310.2339151  
0.3310689 0.3188957 0.131528112 0.159180697 7.6972610.135671956  
0.10407115 0.9124992 0.982828645 0.5093996 0.2202769 2.941559  
0.537677658 0.9608383 0.5999282 0.2094652 0.36993592 0.2992486  
0.8270382 0.3401840.1322865 0.7657202 0.2044248 0.3552866  
0.8875613 0.4414161 1.5913830.4823147 0.488723886 0.8166025  
0.234088251 2.9139880.3302485 0.4685819 0.4328901 0.7066255  
1.1890383.7944770.6332344 0.3529816 1.470661165 1.0279120.9343055  
0.06810881 1.1022030.6651967 0.1230828 0.4304251 1.07382 0.3524332  
1.5795970.2921136 0.3291230.3127383 0.1001812 0.456525817 0.3525444  
0.8360446 1.3624460.2352865 0.4738377 0.3555582 0.9504715  
0.7907179 0.9872548 0.8824218 0.138120168 0.147311648 0.3595275  
1.88168 0.2411393 0.3017902 0.06708236 0.3265066 0.05227327  
0.3452201 0.4017821 0.2009702 0.1980432 0.1971331.6753710.2720326  
0.1170279 0.1961803 0.4503203 0.03725126 1.912749627 0.9465957  
0.1026643 0.1773219 0.2280788 0.5412124 1.4966970.6516346 0  
0.9006974 0.5718643 1.2694210.392352094 0.4471944 0.3573784  
0.1602701 0.08970007 0.2421431 0.187029916 0.1759430.04325794  
7.9654090.1005007 0.1893080.3805825 0.313047007 0.1735642 2.843416  
0.2597711 0.1521017 0.257563442 5.1608790.2642073 1.0148730.128655199  
0.325220525 0.4202007 0.09430441 0.2246233 0.4045193 0.3280196  
0.11235 0.7271767 0.1292731 0.1368507 1.2882930.3484912 0.1932876  
0.737637046 0.08544296 2.4524551.6378430.1338017 0.0188624 0.5041813

|             |             |             |             |             |             |             |             |             |            |
|-------------|-------------|-------------|-------------|-------------|-------------|-------------|-------------|-------------|------------|
| 0.2351719   | 0.2453890   | 0.7295677   | 1.0127970   | 0.3927051   | 0.4731031   | 0.1538725   |             |             |            |
| 0.3743751   | 0.7039092   | 0.08392407  | 1.6899520   | 0.1575821   | 0.8771754   |             |             |             |            |
| 0.1590740   | 0.5639025   | 1.3815120   | 0.9099881   | 0.6164020   | 0.3774254   | 0.08445613  |             |             |            |
| 4.2407370   | 0.09623126  | 0.5440911   | 0.2843213   | 0.5051961   | 0.7603614   |             |             |             |            |
| 0.2558570   | 0.03487793  | 0.1194906   | 0.1708896   | 0.5205535   | 1.51401     | 1.222913    |             |             |            |
| 0.1059487   | 0.8921221   | 0.1668008   | 0.3039856   | 0.6128318   | 5.859258    |             |             |             |            |
| 0.2033696   | 1.2216720   | 0.387686575 | 0.05477544  | 0.2513967   | 0.5487878   |             |             |             |            |
| 0.1495563   | 0.1479965   | 0.800742828 | 0.073510568 | 0.1912894   | 0.146068609 |             |             |             |            |
| 0.1794755   | 0.3813666   | 1.0403890   | 0.2188189   | 0.1509426   | 0.1636205   |             |             |             |            |
| 0.1892010   | 0.4346383   | 0.2367182   | 0.1026150   | 0.3253705   | 0.332117189 | 0.6193392   |             |             |            |
| 0.4517239   | 0.1137341   | 0.1218702   | 0.9028373   | 0.5009815   | 0.2866796   |             |             |             |            |
| 0.3495946   | 0.4751027   | 3.219481    |             |             |             |             |             |             |            |
| AC110609.1  | 0.1465989   | 0.3013557   | 0.1130633   | 0.313338218 | 0.103208542 |             |             |             |            |
| 0.1516589   | 0.2396851   | 0.2300079   | 0.6909080   | 0.2971851   | 0.09288557  | 0           |             |             |            |
| 0.1985355   | 0           | 0.358766749 | 0.2365903   | 0.07680232  | 0           | 0.1085254   | 0           | 0           |            |
| 0.4236254   | 0           | 0           | 0           | 0.2070633   | 0.2031868   | 0           | 0.067793853 |             |            |
| 0.1850559   | 0.102983432 | 0.2867026   | 0.3216744   | 0.08239312  | 0           | 0.2660513   |             |             |            |
| 0           | 0           | 0.3371257   | 0.1618484   | 0.06417079  | 0.3498590   | 0.1406535   | 0           |             |            |
| 0.2634148   | 0           | 0           | 0           | 0           | 0           | 0.07709784  | 0           | 0           | 0.05039572 |
| 0           | 0.4754964   | 0           | 0           | 0.1593599   | 0.08454609  | 0.07761203  | 0           | 0.2456374   |            |
| 0.1104801   | 0.2150442   | 0           | 0           | 0.1726921   | 0.1201160   | 0.246175863 | 0.09066241  |             |            |
| 0           | 0           | 0           | 0.06875661  | 0.4654343   | 0.1492581   | 0.1209757   | 0           | 0.08299901  |            |
| 0.189815683 | 0.04637068  | 0.2388376   | 0           | 0.5281456   | 0.09317238  | 0.1823571   |             |             |            |
| 0.106281224 | 0.1664403   | 0           | 0.4863933   | 0           | 0.09706552  | 0           | 0.1019421   |             |            |
| 0.3618982   | 0           | 0           | 0.08911204  | 0           | 0           | 0           | 2.0977770   | 0.131222181 |            |
| 0.5369688   | 0           | 0           | 0.2006742   | 0.2935279   | 0.09468552  | 0           | 0.07968511  |             |            |
| 0.06783557  | 0.1847960   | 0           | 0           | 0.0755852   | 0.09294814  | 0           | 0.1501287   |             |            |
| 0.2744048   | 0.3991434   | 0.101664783 | 0.1919185   | 0.1138339   | 0           | 0.4041499   |             |             |            |
| 0.12587373  | 0.06446611  | 0           | 0.8735499   | 0           | 0           | 0.05116499  | 0.3553914   |             |            |
| 0.04682624  | 0.2826302   | 0           | 0.1970753   | 0.7989840   | 0.07275057  | 0           | 0.05015656  |             |            |
| 0.2951845   | 0.3176477   | 0           | 0.7762316   | 0.07692605  | 0           | 0.06965448  |             |             |            |
| 0.1408970   | 0.9680016   | 0.2106912   | 0.8337456   | 0.1490812   | 0           | 0           | 0           |             |            |
| 0.3424981   | 0.2001660   | 0.2892094   | 0.1328832   | 0.05433604  | 0.1372473   | 0           | 0           |             |            |
| 0.09777119  | 0           | 0.1627520   | 0           | 0.1251876   | 0.1294232   | 0.4445352   | 0           |             |            |
| 0.6603308   | 0           | 0.1260020   | 0.4993783   | 0           | 0.1171770   | 0.2827778   | 0.2368591   |             |            |
| 0.08488577  | 0.067896225 | 0.5534043   | 0.2496139   | 0.4170466   | 0.06194658  | 0           |             |             |            |
| 0.1140492   | 0           | 0.6333870   | 0.3809644   | 0.0488832   | 0.1047170   | 0.712139345 | 0           |             |            |
| 0.09188046  | 0           | 0.2556015   | 0.06465302  | 0.04902373  | 0.06995068  | 0.03736255  |             |             |            |
| 0.08411207  | 0.1047359   | 0           | 0.3688642   | 0           | 0           | 0.152016849 | 0.6442976   | 0           |            |
| 0.291536607 | 0.2778481   | 0.083939563 | 0           | 0.3856662   | 0.2627630   | 0.2968694   |             |             |            |
| 0.0552826   | 0           | 0.092527584 | 0.3492880   | 0           | 0.08422204  | 0           | 0.07158242  | 0           |            |
| 0.05267677  | 0.4416242   | 0.1071628   | 0.09650843  | 0.142611673 | 0.119144    |             |             |             |            |
| 0.273231721 | 0.1464656   | 0.09251317  | 0.09944302  | 0.08916645  | 0           | 0           |             |             |            |
| 0.1783481   | 0.6929267   | 0           | 0.062801718 | 0           | 0.08609503  | 0           | 0           | 0.05823215  |            |

|             |             |                    |             |                   |                    |             |             |            |           |
|-------------|-------------|--------------------|-------------|-------------------|--------------------|-------------|-------------|------------|-----------|
| 0.06157041  | 0.07932622  | 0.1504056          | 0.0474653   | 0.08255514        | 0.3147322          |             |             |            |           |
| 0.3601480   | 0.07015994  | 0                  | 0           | 0.1394065         | 0.06277382         | 0.09154345  | 0           | 0          |           |
| 0.1386758   | 0           | 0.07856866         | 0.3169162   | 0.069092644       | 0                  | 0.05722453  | 0           |            |           |
| 0.6908608   | 0           | 0                  | 0.4035218   | 0.07321708        | 0                  | 0.14069     | 0.2814910   |            |           |
| 0.09861298  | 0.05057381  | 0.1360804          | 0           | 0.0763283         | 0.1051243          | 0.06522043  |             |            |           |
| 0.191365144 | 0           | 0.1437977          | 0.1432891   | 0                 | 0.1722851          | 0.2124693   |             |            |           |
| 0.2976256   | 0.1062696   | 0.4852195          | 0           | 0.1465407         | 0.10568306         | 0.1491351   |             |            |           |
| 0           | 0           | 0                  | 0           | 0.093559048       | 0.0440065          | 0           | 0.2718526   | 0          | 0.1019832 |
| 0.064481241 | 0.06077612  | 0.2180288          | 0.4548138   | 0                 | 0.053052769        | 0.2138650   |             |            |           |
| 0.1776865   | 0.270303299 | 0.142351063        | 0.0358877   | 0                 | 0.07150475         | 0.07455184  |             |            |           |
| 0.1531480   | 0           | 0                  | 0.05990043  | 0.08202094        | 0.09039216         | 0           | 0.117406677 |            |           |
| 0.1495957   | 0.1321175   | 0.5135957          | 0.05205852  | 0                 | 0.3269382          | 0.06862415  |             |            |           |
| 0.3759291   | 0.4257818   | 0                  | 0.2989383   | 0                 | 0                  | 0           | 0.08803013  | 0.04198182 |           |
| 0           | 0.1839324   | 0.07313241         | 0           | 0.08585171        | 0.05972312         | 0.1722411   | 0           | 0          |           |
| 0.1182943   | 0.08945529  | 0                  | 0           | 0.2212430.1220014 | 0.1717755          | 0.05270128  |             |            |           |
| 0.06106516  | 0.05230179  | 0.1994652          | 0.1918733   | 0.3534355         | 0.1809387          | 0           |             |            |           |
| 0.1358217   | 0.3244879   | 0.2128903          | 0.1479947   | 0.3282732         | 0                  | 0           |             |            |           |
| 0.208852732 | 0.04795111  | 0.1354313          | 0.07117271  | 0.4189552         | 0.1554696          |             |             |            |           |
| 0.06095481  | 0.064352073 | 0                  | 0           | 0.08978008        | 0.2356610          | 0.1702727   | 0           |            |           |
| 0.3580885   | 0.1806861   | 0                  | 0.1989370   | 0.4430743         | 0.058147911        | 0.4518144   |             |            |           |
| 0.07532282  | 0.07965142  | 0.1066867          | 0.2073063   | 0.1644620         | 0.1440186          |             |             |            |           |
| 0.1584422   | 0.216798    |                    |             |                   |                    |             |             |            |           |
| AC069549.1  | 0.3857402   | 0.06099585         | 0.2746147   | 0                 | 0.062669716        | 0.1381342   |             |            |           |
| 0.1455403   | 0.1862188   | 0.05244117         | 0.02577929  | 0.1128029         | 0.050554552        |             |             |            |           |
| 0.1808304   | 0.085075137 | 0.381234606        | 0           | 0.2331774         | 0                  | 0.3953893   | 0           | 0          |           |
| 0           | 0.03112926  | 0.1292002          | 0           | 0.1535995         | 0.03143295         | 0           | 0.04982319  |            |           |
| 0.041165406 | 0.1123686   | 0.093799539        | 0           | 0.07813012        | 0.1000606          | 0.129184163 |             |            |           |
| 0.0807751   | 0.05944624  | 0.3827668          | 0           | 0.1474151         | 0                  | 0.07081315  |             |            |           |
| 0.2989238   | 0.05775613  | 0.03998731         | 0           | 0                 | 0                  | 0           | 0           | 0.1059134  |           |
| 0.11812748  | 0           | 0                  | 0.04434164  | 0                 | 0.06372411         | 0           | 0.1144782   | 0.08667542 |           |
| 0.04838281  | 0.05133761  | 0                  | 0.216773686 | 0                 | 0.06708508         | 0.04352598  | 0           | 0          |           |
| 0           | 0           | 0.298963072        | 0.1926803   | 0                 | 0                  | 0.05076397  | 0.5010001   | 0.2826184  |           |
| 0.04531582  | 0           | 0.09431671         | 0.0503982   | 0                 | 0                  | 0           | 0.1118125   | 0          |           |
| 0.02828781  | 0.07381993  | 0.290409719        | 0           | 0                 | 0                  | 0.724970569 | 0           | 0          | 0         |
| 0.2197498   | 0           | 0                  | 0.1082202   | 0                 | 0.1688250.07764587 | 0.032675608 |             |            |           |
| 0.4899233   | 0.039840001 | 0.06521104         | 0           | 0                 | 0                  | 0.02970573  | 0.1149888   |            |           |
| 0.1400122   | 0           | 0.1647630.07480722 | 0.1014135   | 0                 | 0                  | 0           | 0           | 0          |           |
| 0.04558017  | 0.1666225   | 0.09694625         | 0.18519697  | 0.1748035         | 0.2073648          | 0           |             |            |           |
| 0.04090094  | 0.229297036 | 0.03914475         | 0           | 0                 | 0                  | 0           | 0.03106812  |            |           |
| 0.0539497   | 0.02843357  | 0.2145214          | 0           | 0                 | 7.8024050          | 0           | 0           | 0.06091158 |           |
| 0           | 0           | 0                  | 0           | 0.2335530         | 0.08459042         | 0.08555468  | 0.04521419  | 0.1705797  |           |
| 0           | 0           | 0                  | 0           | 0                 | 0                  | 0.04390304  | 0.2420657   | 0.04949044 | 0         |
| 0.1010929   | 0           | 0.1781042          | 0.05119818  | 0.06588359        | 0.1206953          | 0           | 0           | 0          |           |
| 0           | 0           | 0.04455138         | 0.03835098  | 0.01912756        | 0                  | 0           | 0.1778790   | 0          | 0         |

|                    |             |                   |                    |                            |                    |             |             |            |            |
|--------------------|-------------|-------------------|--------------------|----------------------------|--------------------|-------------|-------------|------------|------------|
| 0                  | 0           | 0                 | 0.4889931          | 0                          | 0.03462616         | 0.224402819 | 0.04273352  | 0          | 0          |
| 0.1271713          | 0.518905542 | 0.4621940.1673734 | 0                  | 0.06208198                 | 0                  | 0.02976792  |             |            |            |
| 0.04247506         | 0           | 0.1532222         | 0.06359716         | 0                          | 0                  | 0.04520352  | 0           | 0          |            |
| 0.6520446          | 0.041210405 | 0                 | 0.04217834         | 0                          | 0                  | 0           | 0           | 0.10393077 |            |
| 0.4206145          | 0.3356839   | 0.03425968        | 0.056184084        | 0.07069757                 | 0                  | 0.1205528   |             |            |            |
| 0.07671125         | 0           | 0                 | 0                  | 0.06704015                 | 0                  | 0.1172026   | 0.129893798 | 0          |            |
| 0.041477561        | 0.05929066  | 0.05617533        | 0.1509581          | 0.1082863                  | 0                  | 0.1099216   |             |            |            |
| 0.05414776         | 0.1262265   | 0                 | 0                  | 0.03582953                 | 0                  | 0           | 0.1420341   | 0.176797   |            |
| 0.07477288         | 0.04816802  | 0.1369927         | 0.2305729          | 0.05012867                 | 0                  | 0           |             |            |            |
| 0.0738845          | 0.04260213  | 0.323563054       | 0.08649214         | 0                          | 0.03811717         | 0           |             |            |            |
| 0.1511248          | 0.1890016   | 0.08420593        | 0                  | 0                          | 0                  | 0           | 0.15661088  | 0          | 0          |
| 0.2138941          | 0.04754468  | 0                 | 0.08891694         | 0.2158897                  | 0.1281435          | 0           |             |            |            |
| 0.05263623         | 0.1796377   | 0.03070915        | 0.08263001         | 0.2488309                  | 0.04634764         |             |             |            |            |
| 0.03191649         | 0           | 0.116199677       | 0                  | 0                          | 0.1160096          | 0           | 0           | 0.3870432  |            |
| 0.7228903          | 0.06452844  | 0.07365808        | 0.1057329          | 0                          | 0                  | 0.2263924   | 0           |            |            |
| 0.2920927          | 0.07629     | 0.1716191         | 0                  | 0.3473779                  | 0.06131821         | 0           | 0.2136899   |            |            |
| 0.03096282         | 0           | 0.03915394        | 0.1845207          | 0.04413008                 | 0                  | 0.0588012   |             |            |            |
| 0.032214407        | 0           | 0                 | 0.1078938          | 0.109421376                | 0.04321881         | 0.1307492   |             |            |            |
| 0.2005150.04341871 | 0.04526895  | 0.09299367        | 0                  | 0                          | 0.1178003          | 0           | 0           |            |            |
| 0.1097748          | 0           | 0                 | 0.09083665         | 3.8507360.4158170.06322137 | 0.1203187          |             |             |            |            |
| 0.07940864         | 0.04166957  | 0.06521988        | 0                  | 0.05383653                 | 0.3267353          | 0.1160696   |             |            |            |
| 0                  | 0.0796016   | 0                 | 0                  | 0                          | 0                  | 0.1932751   | 0.1563912   | 0          | 0.05229363 |
| 0                  | 0.2360299   | 0.1077450         | 0                  | 0                          | 0.1343420          | 0.05215227  | 0.1600049   | 0          |            |
| 0.0317584          | 0.1211182   | 0.05825411        | 0                  | 0                          | 0.1126368          | 0           | 0.07881349  |            |            |
| 0.03231751         | 0.04493225  | 0.3488314         | 1.9026260.07753982 | 0                          | 0.1455830          | 0           |             |            |            |
| 0.06359891         | 0.1888067   | 0.03701264        | 0.039075507        | 0.1807687                  | 0.207052498        | 0           |             |            |            |
| 0                  | 1.4747540   | 0.05835311        | 0                  | 0.03657174                 | 0.05775943         | 0.06039872  |             |            |            |
| 0.07272847         | 0.03843444  | 0.105924751       | 0                  | 0.0457371                  | 0.04836549         | 0.06478168  |             |            |            |
| 0                  | 0           | 0.5181202         | 0.08745018         | 0.1443126                  | 0.09873216         |             |             |            |            |
| AL353804.2         | 0           | 0                 | 0                  | 0.09120219                 | 0.135182369        | 0.1324284   | 0           | 0          | 0          |
| 0.2433227          | 0.072699485 | 0.2600414         | 0                  | 0                          | 0.1377269          | 0.0670637   | 0           | 0          |            |
| 0.2894592          | 0.271751199 | 0.2219456         | 0.3133559          | 0.1393463                  | 0.1738162          | 0           |             |            |            |
| 0.3164130.2217781  | 0.2865910   | 0.2154541         | 0.179850029        | 0.1001394                  |                    |             |             |            |            |
| 0.5055942          | 0.2158367   | 0.232215048       | 0.2323157          | 0.4274305                  | 0.2201736          | 0           |             |            |            |
| 0                  | 0           | 0.2036643         | 0.3070461          | 0.3322226                  | 0.2875168          | 0.1071329   | 0           |            |            |
| 0.08731369         | 0           | 0.1194143         | 0.1808198          | 0                          | 0.169872083        | 0.06732175  |             |            |            |
| 0.1130786          | 0.06376507  | 0.1320165         | 0.2290946          | 0.2076015                  | 0.4115608          |             |             |            |            |
| 0.2492855          | 0           | 0                 | 0.2033122          | 0.077932326                | 0.1429935          | 0.09647106  |             |            |            |
| 0.3129606          | 0.128273659 | 0.06560193        | 0.3015891          | 0.1573278                  | 0.214960479        |             |             |            |            |
| 0.3166652          | 0           | 0.1299816         | 0.2190019          | 0.5403438                  | 0.08128334         | 0.1954979   |             |            |            |
| 0.4225435          | 0.2034468   | 0.1087120         | 0.1214725          | 0.08342107                 | 0.3215816          | 0           |             |            |            |
| 0.08135802         | 0.05307802  | 0.046402321       | 0.04844516         | 0.1150939                  | 0.2426961          |             |             |            |            |
| 0.417014771        | 0.1695150   | 0                 | 0.2528073          | 0.1316117                  | 0.3189570.07781253 |             |             |            |            |
| 0.1863183          | 0.1456663   | 0.4466316         | 0.187955368        | 14.3724                    | 0.057291529        | 0           |             |            |            |

|             |             |                    |             |                     |                     |             |             |   |
|-------------|-------------|--------------------|-------------|---------------------|---------------------|-------------|-------------|---|
| 0.1532030   | 0.08761422  | 0.08543609         | 0.08267929  | 0                   | 0                   | 0.05923394  |             |   |
| 0.0537879   | 0.07291838  | 0                  | 0           | 0.1320018           | 0.1623244           | 0.2705568   | 0           | 0 |
| 0.1394126   | 0.088773572 | 0                  | 0.09939964  | 0.04785424          | 0.1176344           | 0.329738389 |             |   |
| 0.05629173  | 0           | 0                  | 0.3228239   | 0.4493321           | 0.09698286          | 0.1340316   | 0           |   |
| 0.1226658   | 0           | 0.1932811          | 0           | 13.854470.2491643   | 0.1905771           | 0           |             |   |
| 0.04379665  | 0           | 0.1386848          | 0           | 0.09682922          | 0.2686870.054157974 | 0.1216444   |             |   |
| 0           | 0.2600793   | 0                  | 0.4368154   | 0.2603550.583796484 | 0                   | 0.4331676   |             |   |
| 0.1495345   | 0.2621771   | 0.2525374          | 0.1160334   | 0.09489234          | 0.05992209          | 0           |             |   |
| 0           | 0.3414948   | 0.07362505         | 0.2368581   | 0.1157098           | 0.2547018           | 0.1093137   |             |   |
| 0.3390366   | 0.07763352  | 0.1085469          | 0.06406668  | 0.1103005           | 0.2200496           | 0           |             |   |
| 0           | 0.1023189   | 0.4115354          | 0.0689417   | 0.6670994           | 0.059286905         | 0.4832320   |             |   |
| 0           | 0.4868251   | 0.1319720.09958762 | 0           | 0                   | 0.06653153          | 0.04268475  | 0           |   |
| 0.124367851 | 0.1477008   | 0.08022991         | 0.1341335   | 0.3124674           | 0.2258198           |             |             |   |
| 0.1712299   | 0.1832426   | 0.1304998          | 0.4406794   | 0.1829106           | 0.3576138           |             |             |   |
| 0.1840525   | 0.5200359   | 0                  | 0.132740937 | 1.5940330.177786676 | 0                   | 0.06065416  |             |   |
| 0.219887789 | 0           | 0.08419083         | 0.5506665   | 0.44836992          | 0.3456346           | 0.2413635   |             |   |
| 0.2956009   | 0.16158996  | 0.1016660.2107319  | 0.05778661  | 0.4780268           |                     |             |             |   |
| 0.2601438   | 0           | 0                  | 0.2759837   | 0.09640644          | 0                   | 0.08427105  | 0.249056697 |   |
| 0.2080728   | 0.178939218 | 0.2131559          | 0.0807824   | 0                   | 0.1557201           | 0.2235108   |             |   |
| 0.2107622   | 0.07786667  | 0                  | 0.4047336   | 0.054838388         | 0.1030486           | 0.1503562   |             |   |
| 0.03470867  | 0.2553134   | 0.05084825         | 0           | 0.2078027           | 0.3283351           | 0.08289329  |             |   |
| 0.5046094   | 0.06870595  | 0.06289616         | 0           | 0.06126358          | 0.82719418          | 0.2487584   |             |   |
| 0.2434591   | 0.1644421   | 0.07993563         | 0.5795294   | 0.0679480.2421831   |                     |             |             |   |
| 0.04649478  | 0.2058182   | 0.1383654          | 0.180994852 | 0.225212765         | 0.09993678          |             |             |   |
| 0.1106441   | 0.2010863   | 0.3075883          | 0.3418559   | 0                   | 0.09589961          | 0           |             |   |
| 0.4299763   | 0           | 0.3784651          | 0.04305437  | 0                   | 0.3564759           | 0.1951794   | 0           |   |
| 0.1376916   | 0           | 0.055699941        | 0.4134780   | 0.04170662          | 0                   | 0           | 0.06184264  |   |
| 0.8662878   | 0           | 0.3177699          | 0           | 0.1279592           | 0                   | 0           | 0.3973576   | 0 |
| 0.1097081   | 0.2467952   | 0.408478264        | 0.07685284  | 0                   | 0.1899051           | 0.3072946   |             |   |
| 0           | 0           | 0.112609891        | 0.05306964  | 0.4442258           | 0.1134694           | 0           | 0.277953699 |   |
| 0.1867467   | 0           | 0.1551556          | 0.157352353 | 0.124300784         | 0                   | 0.2059633   | 0           |   |
| 0.1301972   | 0.3343216   | 0.1145085          | 0.3368852   | 0                   | 0.2092199           | 0.358103    |             |   |
| 0.3551865   | 0.2149102   | 0.153779062        | 0           | 11.305760.07474519  | 0.2272872           |             |             |   |
| 0.2306975   | 0.2283857   | 0.05992253         | 0           | 0.1858961           | 0.3096764           | 0.3654456   |             |   |
| 0.1669128   | 0.3421719   | 0.2289406          | 0.5380747   | 0.03665847          | 0.1931686           |             |             |   |
| 0.1606096   | 0.7663097   | 0.2084531          | 0.07496562  | 0                   | 0.07520035          | 0.06282445  |             |   |
| 0.06788411  | 0           | 0.3905613          | 0           | 0                   | 0.1931891           | 0.2130629   | 0.2999883   |   |
| 0.1840748   | 0           | 0.09133972         | 0.1741728   | 0                   | 0.6172389           | 0.1579954   |             |   |
| 0.2429644   | 0.1185994   | 0.2266739          | 0.04647388  | 0.5169151           | 0                   | 0.3109152   |             |   |
| 0.3345162   | 1.276589755 | 0                  | 0.4139046   | 0.3107396           | 0                   | 0           | 0.05322567  |   |
| 0.056192156 | 0           | 0                  | 0.1567917   | 0.4801508           | 1.0603780.1486819   | 0.1678283   |             |   |
| 0.0625365   | 0.2629582   | 0.08306038         | 0.08685579  | 0.1045865           | 0.1105406           |             |             |   |
| 0.253873442 | 0           | 0.2630872          | 0.2086546   | 0                   | 0.4525490.1914774   | 0.08765621  |             |   |
| 0.3143922   | 0           | 0.2366347          |             |                     |                     |             |             |   |

MAGI2-AS3 0.7527427 2.7700881.3983233.688765745 0.668485053 2.116787  
4.0669782.8096772.6922233.8652460.5084137 2.680000077 1.9353492.116233966  
3.188718863 1.7657060.8167407 0.6462445 0.6788791 0.1036824  
0.508328637 0.3268311 0.3567695 0.03050237 0.1642968 0.8604148  
0.4627931 0.1059193 0.5646028 0.3162955 2.2943270.460342586  
0.2615468 0.2833889 0.5798350.245374899 0.7749303 0.6711008  
0.6374903 0.9665720.2615471 0.3562596 0.6048874 1.6772240.2256042  
0.1373156 0.7387056 0.06470136 0.08730993 0.5238909 0.1211914  
0.2677098 0.2773247 0.197753023 0.1687995 0.3831006 0.1142012  
0.1234728 0.3528589 1.3798190.2555253 0.5766804 0.4049797  
0.6677068 0.1416044 0.188425282 1.0478630.1065455 1.5488550.821298997  
0.2056092 0.03600909 0.1847152 0.603146746 3.3118451.4582460.3530691  
0.08716119 0.4032243 0.7885358 0.3909791 0.1450460.5020164  
0.5073007 1.083492413 0.1389924 0.2278418 0.3647635 0.153391  
8.3710160.08397056 0.527717135 0.03615155 0.1248228 0.05795477  
0.242729501 0.4882834 0.5316051 0.3905896 0.1811079 0.3221402  
1.2027810.1463277 0.1761142 0.08551188 0.6682521 0.561036668  
1.0178440.54210846 0.3974816 0.1760616 0.9084984 0.2432171  
0.1364368 0.2616008 0.5308821 0.04153908 0.1821144 1.655312  
0.3047204 0.09584635 0.1083955 0.3349156 0.2822385 0.1211396  
0.7434763 0.1555611.5626031.303722945 0.1438151 1.12747 1.328434  
0.5144089 1.174539958 0.3578992 1.6426490.3057505 0.1959344  
0.2280095 0.5587131 0.03200618 0.4191555 0.2758337 0.4088474  
0.1750032 0.2106033 2.62982 0.1245768 0.1687625 1.2254090.2627686  
0.4327786 0.4429443 0.241053524 0.3612875 0.5674264 0.265120172  
1.0094240.6096204 0.1882583 1.0324140.4520085 0.1787435 0.388600049  
0.03951893 0.09266371 0.1562233 0.07564983 0.3316766 0.7654413  
0.5048905 0.2200031.9151150.532767899 0.5631873 0.1164764 0.1428158  
0.08461995 0.1621912 0.5905948 0.2513148 0.1065967 0.813257  
0.3748217 0.8724888 1.8760880.3123853 0.05497334 2.0539250.09335924  
0.04938894 2.51562 0.32385185 0.7995137 0.1691577 0.5500280.3261507  
1.4614780.1456592 0.154118891 0.4549126 0.1509307 0.1350564  
0.2729398 3.051521686 1.23887 0.7902905 1.6355570.04929976 0.1364971  
0.1290558 0.2060251 0.1782121 0.09646298 0.8517259 0.1216902  
0.3021627 0.3764277 0.204075058 0.095093895 0.2435029 0.599672546  
0.518615411 0.4779704 0.063447479 0.2610721 2.7065560.1808081  
0.289978023 0.1495966 0.1095095 0.125 0.819973481 0.5189293  
0.1666912 1.10566 3.3839110.03623738 0.1119457 0.4359574 0.0741417  
3.2546570.05306979 0.6980361 0.32338807 0.3447028 0.393471307  
2.1009271.4672830.7218537 0.2045191 0.1578964 0.1038038 0.3370203  
1.0836480.05235135 1.126184725 0.4890754 0.3545561.0142780.1112661  
0.8954978 0.2856549 0.4652099 0.1685708 1.6961460.1570785  
0.06357591 0.8786310.9197270.6162668 0.179011936 0.4009664 0.7775823  
0.2879658 0.4915233 4.1343750.02839496 0.4843453 0.1415601

|                           |                   |                     |                           |                     |               |
|---------------------------|-------------------|---------------------|---------------------------|---------------------|---------------|
| 2.7011190.2767189         | 0.273731684       | 0.076188106         | 0.2192549                 | 0.1354093           |               |
| 2.1468290.4517222         | 0.1653083         | 1.6302280.3921696   | 0.3243453                 | 0.951591            |               |
| 1.2509460.4744732         | 0.06040204        | 0.3045              | 1.2307640.1038970.6386167 |                     |               |
| 1.0288750.3654869         | 0.701622811       | 0.4584207           | 0.07683437                | 1.0942850.1373888   |               |
| 0.09654636                | 0.5353312         | 0.4318324           | 0.4071703                 | 0.3288223           | 0.1180024     |
| 0.2062537                 | 0.373245294       | 1.8522190.1275048   | 0.68959                   | 0.5763521           | 0.4512107     |
| 0.49137212                | 0.6147963         | 0.7646156           | 0.5541022                 | 0.8071870.2937247   |               |
| 0.04809505                | 0.502521035       | 1.5936050.5095591   | 0.1591891.392             | 0.316659997         |               |
| 0.2006744                 | 0.1714765         | 0.9355250.852484289 | 0.100178413               | 0.4798579           |               |
| 0.0811522                 | 0.4361144         | 0.6470715           | 0.7843746                 | 0.3247116           | 0.1749717     |
| 0.3151913                 | 1.2084270.7525183 | 0.1460737           | 0.05933833                | 0.148417188         |               |
| 0.1403692.1005840.6559445 | 0.3324356         | 0.3357021.04303     | 0.06618024                |                     |               |
| 0.08398637                | 0.1831137         | 0.1871844           | 0.5999595                 | 0.1395032           | 0.5489836     |
| 0.2015958                 | 0.1101342         | 0.1181775           | 0.5203797                 | 0.03116172          | 0.1200881     |
| 1.9164410.8212298         | 0.2257148         | 0.08529823          | 0.09001325                | 0.5471022           |               |
| 0.4763674                 | 0.05829022        | 0.1866369           | 0.4034758                 | 0.2292220.1192465   |               |
| 0.0805904                 | 0.5989041         | 0.6095958           | 0.2917292                 | 3.2441540.2625569   |               |
| 0.0515879                 | 0.2420920.3118514 | 0.06903248          | 0.9963076                 | 0.4272639           |               |
| 0.3529530.1005363         | 0.3155421         | 0.5575030.449100746 | 0.9586139                 | 0.2523915           |               |
| 0.1892184                 | 0.1883677         | 0.8361121           | 0.622792989               | 2.235848418         | 0.5412215     |
| 0.199972638               | 0.1287041         | 0.09623077          | 0.7279891                 | 0.1630993           | 0.6662746     |
| 0.5282707                 | 1.6200670.6594959 | 0.4830876           | 0.7211473                 | 0.1253839           |               |
| 0.274323085               | 0.3674213         | 0.2552229           | 0.2221401                 | 0.7480180.3633744   |               |
| 0.2972059                 | 0.09288542        | 0.9440745           | 1.1150240.5438833         |                     |               |
| AL731577.2                | 0.1600701         | 1.0968260.3703587   | 0.855328648               | 0.535289706         | 0.7037794     |
| 0.8287492                 | 0.9627176         | 0.8015467           | 0.6026316                 | 0.4056840.363628416 |               |
| 0.5961429                 | 0.305963915       | 0.97933626          | 0.7319379                 | 0.6708787           | 0 0.2369961   |
| 0.5687854                 | 0 0.8325957       | 0.2518946           | 0.4646552                 | 0.4346970.3452529   |               |
| 0.2260907                 | 0.5269128         | 0.5823478           | 0.333106011               | 0.2357378           | 0.787127423 0 |
| 0.4917271                 | 0.04498219        | 0.058074682         | 0.6173110.05344806        | 0.3441453           |               |
| 0.09202621                | 0.04418025        | 0.2102027           | 0.5730123                 | 0.4607351           | 0.3634994     |
| 0.3595256                 | 0.2009466         | 0.7199666           | 0.6277933                 | 0.3919068           | 0.3733042     |
| 0.6557082                 | 0.3332934         | 0.247819393         | 0.1262738                 | 0.3534980.07973506  |               |
| 0.4677268                 | 0.3151186         | 0.08653178          | 0.3602455                 | 0.5455085           | 0.4785103     |
| 0.1384728                 | 0.2966038         | 0.243626282         | 0.2682095                 | 0.2714226           | 1.643635      |
| 0.320799709               | 0.5332078         | 0.2828417           | 0.3934611                 | 0.268797428         | 0.4207226     |
| 0.09186266                | 0.8126776         | 0.6846276           | 0.0375374                 | 0 0.4889210.1981386 |               |
| 0.2544002                 | 0.4984427         | 0.36270186          | 0.4303701                 | 0.4172557           | 0.2010610     |
| 0.5849715                 | 0.3318571         | 0.174071411         | 0.4240479                 | 0.1918922           | 0.4172842     |
| 0.065182039               | 0.2119701         | 0.04471876          | 0.3339293                 | 0.03951537          | 0.3017188     |
| 0.03323666                | 0 0.4659635       | 0.1214324           | 0.6981133                 | 0.293786093         | 1.321469      |
| 0.107460327               | 0.05863119        | 0.0478932           | 0.8218660.4930076         | 0.4807512           |               |
| 0.2067727                 | 0.4196161         | 0 0.3333110.3026659 | 0.2279521                 | 0.250949            |               |
| 0.3243496                 | 0.2475926         | 0.5074466           | 0.2416557                 | 0.3278487           | 0 0.4358214   |

|             |             |             |             |             |             |             |
|-------------|-------------|-------------|-------------|-------------|-------------|-------------|
| 0.277517381 | 0.05238856  | 0.7457660   | 0.6582329   | 0.4780620   | 0.137440505 | 0.6687052   |
| 0.4184615   | 0.2725206   | 0.06727922  | 0.3210672   | 0           | 0           | 0.3067751   |
| 0.0385752   | 0.6042210   | 0.3496750   | 0.9150176   | 0           | 0.03971788  | 0.6178135   |
| 0.1642966   | 0.1611548   | 0.08670923  | 0.238164815 | 0.4237805   | 0.08399493  |             |
| 0.372470249 | 0.3042207   | 0.6153771   | 0.1626082   | 0.5751302   | 0.5462161   |             |
| 0.1627805   | 0.219002573 | 0.4138806   | 0.3159652   | 0.04674637  | 0.3551594   |             |
| 0.07894636  | 0.2901881   | 0.4004713   | 0.1123944   | 0.5150576   | 0.294960202 |             |
| 0.1067556   | 0.4603224   | 0.4146511   | 0.5787575   | 0.2388690   | 0.2050370   | 0.4592775   |
| 0.1456153   | 0.8483285   | 0.1201683   | 0.1034441   | 0.2210270   | 0.03894765  | 0           |
| 0.3198617   | 0           | 0.1724164   | 0.2780582   | 0.556015028 | 0.2589676   | 0.6813785   |
| 0.3642958   | 0.03381948  | 0.2062805   | 0.6537793   | 0.067253457 | 0.5379034   |             |
| 0.08319438  | 0.6405020   | 0.2286793   | 0           | 0.6464239   | 0.05016177  | 0.5031818   |
| 0.5023606   | 0.5647529   | 0.5085219   | 0.3437036   | 0.3059690   | 0.3214445   |             |
| 0.05718015  | 0.3130248   | 0.2013799   | 0.04064244  | 0.251443831 | 0.276643275 | 0           |
| 0.666940286 | 0.119372422 | 0.07584502  | 0.366611713 | 0.6741866   | 0.5790205   |             |
| 0.2295271   | 0.140166092 | 0           | 0.1509066   | 0.1232114   | 0.202060238 | 0.1271283   |
| 0.1976323   | 0.3974261   | 0.5977488   | 0.2710808   | 0.3517212   | 0.07546728  |             |
| 0.7764840   | 0.1808272   | 0.4972934   | 0.6059164   | 0.077858265 | 0.06504619  |             |
| 0.447509252 | 0.3465032   | 0.3282968   | 0.4343241   | 0           | 0.5589783   | 0.09883037  |
| 0.09736841  | 0           | 0.4217495   | 0.308577092 | 0.3865716   | 0.7050485   | 0.6727228   |
| 0.03192568  | 0.2861245   | 0.1680706   | 0.4330783   | 0.3284534   | 0.6737507   |             |
| 0.4957771   | 0.7732205   | 0.5112155   | 0.06642949  | 0.03830353  | 0.129295667 |             |
| 0.2592167   | 0.1522168   | 0.1028133   | 0.5247666   | 0.7699649   | 0.4673108   |             |
| 0.07570948  | 0.3779062   | 0.5147309   | 0.1297643   | 0.264045944 | 0.187744935 |             |
| 0.6873130   | 0.5028969   | 0           | 0.2564843   | 0.1835842   | 0.3997257   | 0.2717488   |
| 1.2289461   | 0.0757520   | 0.3312763   | 0.5114549   | 0.02761057  | 0.6686331   | 1.220311    |
| 0.1666845   | 0.4304413   | 0.2492478   | 0.278600066 | 0.1477239   | 0.353276    |             |
| 0.3650644   | 0           | 0           | 0           | 1.51655     | 0.8122445   | 0.7284850   |
| 0.375032047 | 0.1221295   | 0.3726570   | 0.3501604   | 0.03429613  | 0.2700296   |             |
| 0.357547281 | 0.6006292   | 0.3859180   | 0.2968336   | 0.5283530   | 0.5010957   | 0.3357988   |
| 0.176016362 | 0.7299705   | 0.1190319   | 0.2483037   | 0.2643405   | 0.202747608 | 0           |
| 0.05612091  | 0.1455108   | 0.787045282 | 0.194289964 | 0.5094114   | 0.5408485   |             |
| 0.1171132   | 0.2849089   | 0.4598579   | 0.1431872   | 0.4633841   | 0.1765235   |             |
| 0.8829647   | 0.2686740   | 0.09869847  | 0.7390201   | 0.064097699 | 0.2450135   |             |
| 0.9376774   | 0           | 0.2557902   | 0.3605947   | 0.2855850   | 0.2247905   | 0.1465978   |
| 0.05811347  | 0.3388307   | 0.1305633   | 0.1739302   | 1.1498980   | 0.2862789   |             |
| 0.09611939  | 0.3896366   | 0.5736760   | 0.3012515   | 0.1197790   | 0.7168157   | 0.234352    |
| 0.2608447   | 0.04701716  | 0.03927943  | 0.1697714   | 0.4843673   | 0.195351    |             |
| 0.1379748   | 0.8451181   | 0.1509834   | 0.5328493   | 0           | 0.9782496   | 0.1666914   |
| 0.4283092   | 0.6533835   | 0.2618811   | 0.4245046   | 0.03292757  | 0.1012717   |             |
| 0.5561349   | 0.1417223   | 0.4067930   | 0.1211956   | 0           | 0           | 0.6274438   |
| 0.4450381   | 0.03696908  | 0.1942823   | 0           | 0.2829266   | 0.232946219 | 0.526991299 |
| 0.1218967   | 0.418861607 | 0.1470452   | 0.04288605  | 2.6518990   | 0.4415586   |             |
| 0.5771175   | 0.5864909   | 0.5589876   | 0           | 0.09050739  | 0.1961703   | 0.5874583   |



|            |             |             |             |             |             |             |
|------------|-------------|-------------|-------------|-------------|-------------|-------------|
|            | 0.380947392 | 0.04933325  | 0.2056109   | 0.1739415   | 0.1747355   | 0.4810066   |
|            | 0.1496456   | 0.1370122   | 0.2751923   | 0.08650089  | 0.11836     |             |
| AC010618.2 | 0.1931281   | 0           | 0.1489486   | 0           | 0.067983018 | 0.09989708  |
|            | 0.1010035   | 0           | 0.05592986  | 0.1223666   | 0.274203493 | 0.4250169   |
|            | 0.184576058 |             |             |             |             |             |
|            | 0.236318098 | 0.2077880   | 0.7588404   | 1.2991140   | 0.1072279   | 1.0917650   |
|            | 0.341658211 |             |             |             |             |             |
|            | 0.5022724   | 0.7766751   | 0.1401542   | 0.4807654   | 0.5415217   | 0.3409792   |
|            | 0.7026509   | 0.3783313   | 0.312588612 | 0.4875821   | 1.187107934 | 1.3597180   |
|            | 0.0847542   |             |             |             |             |             |
|            | 0.2170880   | 0.385376016 | 0.5257406   | 0.8383212   | 0.7473938   | 0.9992846   |
|            | 0.3731310   | 0.4226902   | 0.4609012   | 1.29707     | 0.1879585   | 0.9109284   |
|            | 0.5657083   |             |             |             |             |             |
|            | 0.4087790   | 0.1317298   | 0.5516514   | 0.3603197   | 0.3819230   | 0.4021257   |
|            | 0.341713697 |             |             |             |             |             |
|            | 0.8633282   | 0.3838527   | 1.4911320   | 0.4647362   | 0.4493242   | 0.3654086   |
|            | 1.6143920   | 0.3760959   | 0.2099393   | 0.3898310   | 0.7668406   | 0.8818212   |
|            | 1.215       | 0.4314675   |             |             |             |             |
|            | 0.9460455   | 0.2832974   | 0.387051823 | 1.18768     | 0.5687577   | 0.9098788   |
|            | 0.324309941 | 0.3583136   | 0.38792     | 0.3922053   | 0.2753393   | 1.0416630   |
|            | 0.9197386   |             |             |             |             |             |
|            | 0.7373673   | 0.9562343   | 0.3069394   | 0.2460199   | 0.125030765 | 0.06108834  |
|            | 0.5034281   | 0.2830151   | 0.6460762   | 0.6137224   | 0.3603536   | 0.490048863 |
|            | 0.1096335   | 0.2315222   | 1.0069251   | 1.101009652 | 0.6393664   | 0.3237249   |
|            | 0.1342977   | 3.9571210   | 0.1323747   | 0.5213097   | 1.29135     | 0.4684959   |
|            | 0.842437    |             |             |             |             |             |
|            | 0.2948011   | 0.106337792 | 1.8069650   | 0.12965322  | 1.2733170   | 0.6934103   |
|            | 0.3432459   |             |             |             |             |             |
|            | 0.5948244   | 0.5155882   | 0.6236894   | 0.3037656   | 0.5248823   | 0.268098    |
|            | 0.4057478   | 1.4301510   | 0.3027755   | 0.3913349   | 0.2489382   | 0.5816331   |
|            | 3.29466     |             |             |             |             |             |
|            | 0.04944458  | 0.4518731   | 0.5258280   | 0.535729206 | 0.5372675   | 0.2249457   |
|            | 0.1443950   | 0.3105804   | 0.331649915 | 0.2547813   | 0.3365886   | 0.8220051   |
|            | 0.4464561   | 0.3389527   | 0.5121117   | 1.8873210   | 0.6437606   | 0.7711060   |
|            | 0.4188764   |             |             |             |             |             |
|            | 0.1944015   | 0.06490623  | 1.6191832   | 0.6313920   | 0.8146482   | 0.4065848   |
|            | 0.363417    |             |             |             |             |             |
|            | 0.6319195   | 0.8892409   | 0.689642464 | 0.5113004   | 1.5707970   | 0.163415801 |
|            | 0.6423355   | 0.1856165   | 0.6376184   | 0.5088652   | 0.6590215   | 0.2945973   |
|            | 0.660578413 | 0.3329040   | 0.6535181   | 0.7896071   | 0.1648106   | 0.8572545   |
|            | 0.2625887   | 0.4652819   | 0.4068189   | 0.0365546   | 0.177937948 | 0.837219    |
|            | 0.0555389   | 0.7504284   | 0.04364272  | 1.0567360   | 0.2886119   | 1.3213830   |
|            | 0.5856268   |             |             |             |             |             |
|            | 0.1637643   | 0.7249284   | 0.3744222   | 0.3734864   | 1.0338060   | 0.9776358   |
|            | 0.1543681   | 1.2417630   | 0.2600301   | 1.73333     | 0.178891792 | 1.2498      |
|            | 0.4110490   | 0.6592963   |             |             |             |             |
|            | 2.5706480   | 0.1991056   | 0.1502474   | 0.162285517 | 0.7880619   | 2.1078920   |
|            | 0.2575932   |             |             |             |             |             |
|            | 0.2069299   | 0.93816618  | 0.4735256   | 1.2709460   | 0.6070998   | 0.4040727   |
|            | 0.5962133   | 0.2583338   | 0.09215242  | 0.2214951   | 1.1080850   | 0.4829236   |
|            | 0.9711547   |             |             |             |             |             |
|            | 0.6247781   | 0.9807198   | 0.303372449 | 0.13351045  | 3.7488310   | 0.625860631 |
|            | 0.096016948 | 0.6863150   | 0.276453126 | 0.4067104   | 0.3810552   | 1.1808190   |
|            | 0.789196041 |             |             |             |             |             |
|            | 2.3465590   | 0.3641441   | 2.2670230   | 0.365685104 | 0.4601490   | 0.9537908   |
|            | 0.435912    |             |             |             |             |             |
|            | 0.6657203   | 0.1308259   | 0.6601144   | 0.1821058   | 1.2491260   | 0.3882322   |
|            | 0.5403423   | 1.127252268 | 0.3139186   | 0.404947231 | 1.6400960   | 0.2132831   |
|            | 0.1637567   | 1.4096050   | 0.1686049   | 0.7154459   | 0.7636012   | 1.5062120   |
|            | 0.9159298   |             |             |             |             |             |
|            | 0.206836094 | 0.9716813   | 0.6805250   | 0.2094593   | 1.6563180   | 0.4602872   |
|            | 1.095016    |             |             |             |             |             |
|            | 0.6270220   | 0.7925723   | 0.3439170   | 0.7613020   | 0.3627973   | 0.1897823   |
|            | 0.4007431   |             |             |             |             |             |
|            | 0.1386421   | 1.052986722 | 0.1876503   | 0.2754793   | 0.4961861   | 0.1507482   |

0.7103960.2562821 0.6850885 0.1402929 0.6210341.1481320.591643318  
0.453036692 0.4146290.9181055 0.2528150.5568685 0.5673321 0.132899  
0.3617083 0.1873547 0.1853438 0.3708337 0.6280875 0.1623899  
0.2331892 0.7170848 0.1226943 0.1508314 0.5193368 0.3436833  
0.588239813 4.2330130.2367973 0.4404582 0.5260687 0.2837086  
2.0059870.5227859 0.06999933 0.7191270.7455315 1.3191850.452484317  
0.3929385 0.3746823 0.3696666 0.3310323 0.1396271 0.400575098  
0.2608820.3991015 0.6088316 0.1738553 0.1007638 0.4726733  
0.297314594 0.1200989 1.1010450.4279770.1594663 0.314510653 1.549591  
0.1354222 0.4096446 0.178047608 0 0.3309470.2485888 0.5651984  
1.2276740.5548286 0.2591377 0.7623858 0.3407672 0.3945615  
0.5402684 0.4167865 0.3242341 0.348008703 0.09853802 2.175631  
0.9021420.3429072 0.4350653 0.6891289 0.6328340.1768735 0.7011516  
0.1752028 1.7328020.8394021 0.6130270.6044530.9857461 0.02765324  
0.5100072 0.1211555 1.5415040.3144923 0.5089514 0.3540542  
0.5105451.5639190.5632906 0.1947999 1.4141710.3329392 0.5490441  
0.5829273 0.7634369 2.3761030.1388564 0 0.1378038 0.5255476  
0.7583166 2.2349410.6753732 0.3665594 0.5815236 0.4274775  
0.8063219 1.8521857.0816012.9082730.5046831 0.20635558 0.1579259  
1.1597040.7969796 0.6899099 0.06827142 0.160602673 0.211942153  
0.1470711 0.224606949 0.4731022.0179750 0.9253027 0.1582511  
0.1415228 0.5554135 1.4410981.0701510.1577892 0.6253952 0.268112431  
0.6547381.7861330.5771265 0.3513702 1.3313790.4333217 0.4628629  
0.6640510.4696434 1.713647  
AC008115.3 0.4854586 0.1108814 0.3432058 0 0.370253593 0.5859173  
0.5732361 0.2115737 0.1906604 0.09372581 0.4613824 0.459503122  
0.5752646 0.579952094 0.099003939 0.5223086 0.7205989 0.6220063  
0.1796897 0.02613644 0.687050391 0.8884561.7825330.3523001 0.6591716  
1.2564942.1713362.6633570.09057112 0.299330235 1.3277510.824148834  
0.1265878 1.4557960.8185284 0.205482824 1.5784990.2701611.809114  
0.5581917 0.1786524 1.4166671.2872771.1256120.6824482 0.5815277  
0.2031427 0.5565798 0.7726227 0.6603165 0.6792912 0.7543053  
0.5294708 0.823162776 0.1702051 1.57239 1.6524330.2781403 0.9267273  
1.5745951.5607830.4726889 0.3957872 0.6066067 1.4135570.689608819  
0.09038026 1.6158460.9494848 0.445920361 0.8707492 0.6671766  
1.2927241.177518789 0.4253206 0.2321666 0.4929356 1.0612350.5692146  
0.2055032 1.1532840.8679844 0.4286342 0.1832328 0.209523323  
0.4094810.3954524 0.7791570.1249244 0.4113841 0.6038712 0.293289718  
0.6430234 0.1697408 3.2597092.438093192 1.1250050.2712449 1.181526  
0.6391557 1.0536930.4703986 1.2295515.1423610.4603481 0.7763172  
0.772191862 7.21392 0.86907805 0.8298076 2.7113310.4793355 0.941414  
3.2400350.3658069 0.5090425 1.0115220.4492717 0.9859155 0.7835073  
0.8244979 2.5411820.6674628 1.5646272.1253810.3314318 0.1514474  
0.6168183 0.224440287 0.1059222 1.3507670.06049333 0.8922216

1.66731105 1.3876071.0340850.9642464 0.5781233 0.4057201 0.4290918  
0.8753966 0.9316887 0.3876598 0.7799358 0.5701029 0.2447284  
10.113530.1574864 0.2810637 1.0787950.5813228 0.3258321 0.7889119  
0.963070836 0.1836051 0.2547387 0.205385979 0.4228751.0109170.6164449  
1.0077871.0583562.9620720.184496703 0.4648932 0.3194184 0.7088588  
2.6237610.4788551.7601570.8846680.3029940.6738298 0.447275715 1.780718  
0.4188179 1.0479570.2925414 2.0391610.3109168 3.2857930.8832404  
0.8232959 0.6479020.6274471 0.8345050.5118531 0.1724523 0.3880289  
0.05202287 0.1307255 4.4975540.262309458 1.5271542.6175360.5984505  
1.0598621.5014521.1959580.815861614 1.2040890.5046217 0.4046888  
0.1155893 0.471646386 0.7468441 0.2028399 0.9749721.1003441.462995  
2.5162840.5790999 0.3917964 1.1605633.3526943.3000780.5234934  
0.2054331 0.571931666 0.755100087 3.7930230.299657445 0.362031115  
0.1533478 0.694909498 0.9087397 1.1706971.3632090.897420426 3.60461  
3.3562280.1556975 1.48094696 0.06425882 0.3995845 1.0957350.6042816  
1.4798341.8963470.3051682 2.5293480.2437381.7151911.01202 0.629673398  
1.5124130.301600042 2.0209040.2297663 1.3172130.1968483 1.789443  
0.4329454 0.1968651 0.4206784 1.1085332.045002405 0.4559291  
0.04751693 0.8336403 4.4538940.1928343 0.1699074 0.7442793  
0.5395699 1.0740644.6474480.5211140.2782783 0.2686222.6331060.718898038  
0.5503043 0.07694018 1.0047240.3536679 1.7399080.8159948 0.2296107  
0.8228474 1.9513360.52473 0.838928173 0.332144387 1.3264830.3496676  
0.5083931.6719580.3889311 0.59389 0.9496216 0.4709463 2.368282  
1.3982260.7176360.8708119 1.1164933.0792851.4186950.9689106 0.9863301  
0.7199195 1.056168282 0.9333650.7936377 0.3954152 0.2644717  
0.3328021 0.5863223 2.5734590.3519092 2.3097640.6727229 2.021941  
0.670769802 0.2057738 1.2557661.3717010.4160515 1.0919230.671273388  
1.06866 0.8081382 0.4801243 0.6797984 0.6754295 0.4526250.711760151  
0.5031466 1.7648820.5737542 2.2714510.263524409 0.1770522 0.3971398  
1.0787411.094014447 1.885568178 0.2772962 1.01541 0.1973218 0.2468766  
0.5916701 0.6513844 0.2981035 0.0713811 0.7603754 0.9506362  
0.1995543 1.3583580.583183984 0.2476912 9.6250870.4724332 0.114927  
0.2187214 0.6856771.8179770.2964 1.0574751.1254680.9239316 0.1406648  
1.4328061.0129271.3117930.5097464 0.4273284 0.2030293 2.09886  
1.7347680.5212090.9229343 0.2376550.3970871 0.9439478 0.522305  
1.9254880.0929885 2.6945021.0684351.0773461.2798680.8725949 0.4044315  
0.4329902 0.6605243 1.4296133.3161130.8654734 0.5118923 1.799081  
0.4656312 0.3818646 1.1843620.3170616 0.8253693 0.4581064  
1.729026717 0.5292964 0.1494925 1.0998710 0.5434356 0.370058982  
0.461717331 0.78045 0.75278103 0.2973045 1.6041262.0106611.527104  
0.6099442 0.5929007 0.6315787 0.3674930.3476868 0.3635761 2.34058  
0.673943816 0.5485965 1.7460080.7033699 0.6476988 1.1727531.149737  
1.3573942.6230270.2623388 1.346102  
AC087294.1 0.07798019 0.04007496 0.05638278 0.104171034 0.092643085

|                   |                   |                             |                   |                           |                        |
|-------------------|-------------------|-----------------------------|-------------------|---------------------------|------------------------|
| 0.07562978        | 0.06374773        | 0.09176088                  | 0.03445443        | 0.1016237                 | 0.185282               |
| 0.132859625       | 0.06930443        | 0.013973829                 | 0.089455501       | 0.1730427                 | 0.1838402              |
| 0.2060729         | 0.1190636         | 0.07557027                  | 0                 | 0.2704063                 | 0.2249750.127329       |
| 0.2779456         | 0.06307287        | 0.2581475                   | 0.1317236         | 0.08183599                | 0.027046132            |
| 0.1845685         | 0.123254694       | 0.09150324                  | 0.1154978         | 0.2300932                 | 0.212188602            |
| 0.2388157         | 0.1366990.2514821 | 0.03362379                  | 0.09685334        | 0.2560072                 |                        |
| 0.1628376         | 0.3927926         | 0.07589285                  | 0.3940817         | 0.1468405                 | 0.1547386              |
| 0.1097025         | 0.1909223         | 0.02727898                  | 0.4543709         | 0.2957419                 | 0.155222153            |
| 0.1076527         | 0.0516633         | 0.2476301                   | 0.4222093         | 0.1674698                 | 0.09484885             |
| 0.09401685        | 0.8399641         | 0.09536414                  | 0.1686469         | 0.1393338                 | 0.320451159            |
| 0.06533082        | 0.2975106         | 0.2573735                   | 0.102559815       | 0.2098053                 | 0.1377899              |
| 0.2276195         | 0.196422084       | 0.1537202                   | 0.0839101         | 0.0742324                 | 0.3502012              |
| 0.1782964         | 0.1671151         | 0.1488650.2171829           | 0.0929507         | 0.09933654                | 0                      |
| 0.02774915        | 0.1429252         | 0.2081424                   | 0.1053510.3159519 | 0.2182523                 |                        |
| 0.127201624       | 0.0774676         | 0.07011205                  | 0.6514368         | 0.071447067               | 0.2517058              |
| 0.03267796        | 0.02033474        | 0.2598805                   | 0.2605663         | 0.09714994                | 0.2133057              |
| 0.3405            | 0.1109199         | 0.06376775                  | 0.203948279       | 9.07716                   | 0.065438316 0.08568877 |
| 0.3149790.1154949 | 0.06004372        | 1.10271                     | 0.07554895        | 0.04599479                | 0.286111               |
| 0.1894394         | 0.1474475         | 0.3164917                   | 0.1375346         | 0.1629488                 | 0.2110813              |
| 0.7138160.4856181 | 0.08984005        | 0.1094729                   | 0.2229317         | 0.081117655               |                        |
| 0.1531305         | 0.1248876         | 0.07652267                  | 0.08061713        | 0.125542266               | 0.3857781              |
| 0.1189176         | 0.2240356         | 0.1720736                   | 0.1906270.1550832 | 0.2551513                 |                        |
| 0.2126733         | 0.1401088         | 0.1832259                   | 0.1471769         | 0.06879462                | 2.429405               |
| 0.09960833        | 0.1306062         | 0.1231264                   | 0.09004408        | 0.07360181                | 0.2376084              |
| 0.243652483       | 0.2433161         | 0.1534470.148462018         | 0.3612495         | 0.08431558                |                        |
| 0.05941246        | 0.09806367        | 0.2328340.4163280.066681165 | 0.1176158         | 0.06596847                |                        |
| 0.3415962         | 0.1896569         | 0.1586463                   | 0.09277327        | 0.08670874                | 0.1231973              |
| 0.1217685         | 0.089808488       | 0.1755247                   | 0.1009133         | 0.1839666                 | 0.1585963              |
| 0.2327361         | 0.1997727         | 0.4776048                   | 0.6916487         | 0.01239822                | 0.1609891              |
| 0.1133866         | 0.1068197         | 0.1707646                   | 0.06232805        | 0.05843424                | 0.2068243              |
| 0.3779766         | 0.4233112         | 0.094804406                 | 0.2523186         | 0.3360914                 | 0.1996552              |
| 0.1359236         | 0.1658121         | 0.3412466                   | 0.098290109       | 0.2105730.09119068        |                        |
| 0.07800716        | 0.1879942         | 0.170463374                 | 0.3627129         | 0.1832770.06128284        |                        |
| 0.3467027         | 0.3740001         | 0.4987253                   | 0.08371977        | 0.0447170.7214590.1462442 |                        |
| 0.3921274         | 0.3573816         | 0.1484961                   | 0.045935262       | 0.080862155               | 0.5783408              |
| 0.243681276       | 0.08723067        | 0.05542328                  | 0.200924458       | 0.1642193                 | 0.1538603              |
| 0.2306226         | 0.307276555       | 0.2960876                   | 0.1654111         | 0.06752699                | 0.129197502            |
| 0.06967365        | 0.02406977        | 0.2244129                   | 0.1092003         | 0.1188544                 | 0.4283635              |
| 0.1378681         | 0.3677664         | 0.1321384                   | 0.08550449        | 0.1636323                 | 0.455155623            |
| 0.3089587         | 0.16350733        | 0.1460799                   | 0.09226956        | 0.09918116                | 0.160077               |
| 0.1191371         | 0.1805492         | 0.03557569                  | 0.2349747         | 0.1232763                 | 0.112745416            |
| 0.09416161        | 0.3434733         | 0.1585768                   | 0.7115496         | 0.1045419                 | 0.2210698              |
| 0.03164693        | 0.1500096         | 0.1041487                   | 1.5314820.1412565 | 0.05747194                |                        |
| 0.04854295        | 0.1819355         | 0.236205053                 | 0.2273052         | 0.05561575                | 0.1878255              |

0.5752051.3073270.0620881 0.0691553 0.4460927 0.2350853 0.1106286  
0.165385685 0.154342652 0.2739544 0.2274796 0.1071842 0.1686369  
0.2030430.1341531 0.1387461 0.1985788 0.2946710.2245998 0.1210391  
0.1967066 0.2219388 0.08143326 0.1634847 0.03045092 0.3250271  
0.07805843 0.050896325 1.0120160.2151286 0.0571647 0.09558588  
0.1718314 0.08476391 0.6926311 0.3391673 0.2661680.1910361  
0.2825660.11594524 0.07437118 0.2723169 0.3038546 0.1127776  
0.0704723 0.055987607 0.04389061 0.07050181 0.3253640.08774789  
0.1424005 0.2044858 0.16720975 0.1091089 0.2174547 0.2592092  
0.1835070.158739193 0.02133018 0.12303 0.1594967 0.161754904 0.141976208  
0.1503314 0.4046318 0.09984304 0.04461331 0.3207639 0.05231659  
0.1693075 0.1160941 0.1194854 0.3599418 0.09015413 0.1718292  
0.210775515 0.1492017 5.8769250.08537387 0.1557643 0.3293780.430422  
0.1095095 0.09641292 0.1910973 0.1591704 0.1788906 0.1652279  
0.3712869 0.1307479 0.2633950.1674851 0.1544459 0.4402754  
0.6710465 0.1031744 0.1027508 0.5956585 0.13743 0.1435160.2326115  
0.1061845 0.4282547 0.08402022 0.09500999 0.3530567 0.1946882  
0.2398524 0.1366625 0.1218087 0.2399547 0.19894 0.2105048  
0.8178110.1203081 0.1110055 0.3251137 0.1165080.0636989 0.8856297  
0.09822262 0.4403574 0.06368066 0.104151379 0.1530395 0.175597  
0.2129559 0.0626778 0.07236142 0.060794297 0.102692182 0.133613  
0.08502238 0.07163493 0.1096855 0.9689296 0.4075784 0.0766773  
0.1571440.5766731 0.07589718 0.08597904 0.05972927 0.2272667  
0.162385409 0.2162998 0.3004979 0.2224367 0.1489680.3825067  
0.1421584 0.1201450.4309181 0.2370375 0.5513791  
AC138207.4 0.4724527 0.1649202 0.4537507 0.190530765 0.301237212  
0.4703162 0.3789363 0.3496507 0.2835801 0.07744652 0.5252704  
0.303753418 0.5523075 0.677297454 0.212700515 0.4172023 0.3922883  
0.4283081 0.2573641 0.9416199 0.359553614 1.3137231.0287092.503536  
0.6415117 0.6921687 1.8414110.6486442 1.39202 0.742018207 1.249043  
1.089603154 0.3138021 0.8449907 0.4358750.882920477 0.6915973  
0.6964981 2.0468460.6457348 0.5904886 1.3110780.3616544 1.154612  
0.2776189 0.4805218 0.2238117 0.8349083 0.7113884 0.4801507  
0.2993625 0.7403925 0.5727361 0.579637773 0.4359904 1.015801  
0.3330295 0.7538423 0.6987592 1.3011021.0489470.6249397 0.2907047  
0.8945292 0.3256341 1.302469224 0.8961847 0.4333066 0.3269035  
0.254578035 0.3974427 0.1890152 0.4163202 1.332254563 0.8021249  
0.6906291 0.3937401 1.1590440.3888205 0.4245231 0.3403461  
0.5958474 2.7343040.3028140.121191771 1.1673350.4531156 1.769119  
0.2202159 1.2407470.4546303 0.242348066 0.4554311 0.4408121  
0.3042102 0.78406811 0.7968022 0.2689587 0.4463113 0.3300877  
5.9389290.5108560.4714193 0.8433490.2333058 0.5131826 0.971828831  
8.7426980.323157333 0.4114067 0.7361309 0.6126028 0.6955335  
1.5617420.2763609 0.2804178 0.3488682 0.5444815 0.8202897

1.3405390.2515534 0.6231672 0.3447067 1.8735960.4925498 0.1643191  
0.3253704 0.3786215 0.241094269 0.5601571 1.0175150.5698428  
0.2580379 0.574047867 0.4703969 0.6991155 0.3870006 1.0903  
0.8984711.8639860.9986876 0.7941746 0.5039811 0.6186896 0.8075681  
0.5122942 21.177620.2082120.4379488 0.8069684 0.4391795 0.3903953  
0.2028088 0.175074798 0.9912024 0.6455119 0.871190196 0.8767407  
0.6168591 0.7334989 0.2434175 1.0646440.4079313 0.341491068  
0.2919507 0.3468905 0.2030554 0.5385863 0.7781754 1.090826  
0.7186195 0.2879219 0.5972859 0.772028583 0.4815571.3689121.74177  
0.4592864 0.4345470.9020518 1.3457361.5407520.8163566 0.7896671  
0.3456436 0.6206035 0.5335665 0.2992478 0.3954461 0.2407271  
0.9361710.8826382 0.842223848 0.5191825 0.1138366 0.6694841  
0.4633127 0.6892576 1.0402440.865164509 0.9885311 1.0285350.6509618  
0.7449975 0.311780693 1.2728190.4525431 0.3222514 0.5222212  
0.3774086 0.8764062 0.3700522 0.3544156 2.1020930.5731785  
0.6424991 0.4229550.5975247 0.525102824 0.757979257 1.9001151.200907429  
0.478639572 1.1784290.260308663 0.4255101 0.3869433 0.7765194  
2.497842461 1.5885462.1480340.6895870.928339668 0.4672595 0.3081684  
0.3742388 0.4301865 0.4891205 1.29275 1.4625480.8648377 0.3625254  
0.6646546 0.5897705 0.585343215 0.5868255 1.208692583 0.7837362  
1.0632052.4670970.3741126 0.4202434 1.3319190.2277401 0.6573  
0.7327928 0.515533673 0.7857690.9894449 0.6163349 0.7893965  
0.3611726 0.4604992 0.6077697 0.6859257 0.4069556 1.611391  
0.3301278 0.5518655 1.1098240.6911240.669636348 0.2165341 0.3814584  
0.3893413 0.3089385 1.6041730.2555106 0.3541617 0.3885295  
0.8026207 0.6214781 0.466344152 0.784154418 0.2922895 0.7627848  
0.5741229 0.7711003 0.9712740.7606422 1.2488121.0896130.4106353  
0.8729442.1031360.8274941 0.7934090.8440101 0.9785995 0.1810097  
0.6136575 0.5948763 0.383997607 0.9995378 0.7607168 0.3746565  
0.2476735 0.3928536 0.6976565 1.4840070.6203432 0.7081109  
0.5399951 1.5237230.424132014 0.5577078 0.4358135 2.1352721.386609  
0.5155806 1.954178705 0.3371623 2.0447653.3325431.4925810.6697365  
0.2618058 0.811625114 0.7206416 0.9147758 0.3792788 0.4769588  
0.48389491 0.4486531.0876170.3565497 1.347773585 0.519354269 0.6153844  
5.0600761.0565570.2039965 0.4190594 1.0286460.4222727 0.6252185  
1.4860790.2992456 0.7667552 0.4377454 0.289134263 1.0097034.217659  
1.0930530.4083506 1.0361941.0019540.6008848 1.10703 0.3883561  
1.0512870.7089210.09298614 2.2070450.5261086 1.3970870.4748166  
0.3329280.5032950.9471991.05241 0.8613599 0.8715763 2.3565190.4199896  
1.6876211.4673910.5385090.6454331 1.3250350.8979922 0.4339827  
0.7520477 0.3172547 1.3033240.5915361 1.0734020.8225368 1.379739  
0.4070847 0.7782858 0.6689693.7646840.2718484 1.1608810.6437494  
0.6495338 0.4076559 0.304791705 0.6910330.3088176 1.5320340.1337453  
0.3403296 0.478133786 1.209129344 0.8553321 0.839740608 0.6878635

|             |             |             |             |             |             |            |
|-------------|-------------|-------------|-------------|-------------|-------------|------------|
| 0.6161804   | 11.519240   | 5.280402    | 0.2892537   | 0.3658065   | 1.0107980   | 2.602825   |
| 0.4173366   | 0.9941381   | 0.2424771   | 0.466723626 | 0.3626484   | 0.7969435   |            |
| 0.9299220   | 4.281597    | 0.5577986   | 0.4300173   | 0.5035878   | 1.3530030   | 4.190945   |
| 0.7019831   |             |             |             |             |             |            |
| PRC1-AS1    | 0.07407359  | 0.08459403  | 0.0190429   | 0.035183057 | 0.008691548 |            |
| 0.03831517  | 0.09419533  | 0.06456586  | 0.02909188  | 0.04290339  | 0.06257772  |            |
| 0.028045271 | 0.05015807  | 0.070793485 | 0.04531948  | 0.05313089  | 0.05174231  |            |
| 0.1581812   | 0.02741791  | 0.1914251   | 0.06988895  | 0.07134992  | 0.1467868   |            |
| 0.04479635  | 0.08940405  | 0.1171634   | 0.1830939   | 0.1197774   | 0.1105582   |            |
| 0.09134647  | 0.09350516  | 0.234159939 | 0.1738384   | 0.2492216   | 0.04163166  |            |
| 0.179163139 | 0.1120255   | 0.1978678   | 0.1274045   | 0.02839052  | 0.01362982  |            |
| 0.01080809  | 0.05892567  | 0.2013635   | 0.03204037  | 0.3105629   | 0.04132865  |            |
| 0.02613095  | 0.1599942   | 0.0806034   | 0.05758305  | 0.1046323   | 0.01468894  |            |
| 0.109219219 | 0.0519414   | 0.3380730   | 0.1721905   | 0.04243998  | 0.1325667   |            |
| 0.08008639  | 0.2381516   | 0.06010427  | 0.06710123  | 0.1139187   | 0.1176476   |            |
| 0.060127887 | 0.01379065  | 0.06512735  | 0.03621923  | 0.012371028 | 0.0506145   |            |
| 0.0581720   | 0.1011538   | 0.069104397 | 0.1145249   | 0.05668013  | 0           | 0.07040361 |
| 0.09264371  | 0.04703499  | 0.1131258   | 0.04075114  | 0.05232244  | 0.02795853  | 0          |
| 0.03124028  | 0.08045334  | 0.1033804   | 0.02541541  | 0.1255419   | 0.2866626   |            |
| 0.017900618 | 0.1308208   | 0.02959983  | 0.2340621   | 0.221198636 | 0.1798329   |            |
| 0.01379595  | 0.03433959  | 0.1219068   | 0.04230986  | 0.1538050   | 0.1500886   |            |
| 0.0838553   | 0.1592154   | 0.03230569  | 0.126888157 | 1.2773950   | 0.044202691 | 0          |
| 0.1034270   | 0.05851143  | 0           | 0.1895123   | 0.03189518  | 0.05178143  | 0.02684223 |
| 0.06855201  | 0.03112463  | 0.1265837   | 0.05806423  | 0.01250792  | 0.08911407  |            |
| 0.1330672   | 0.2087454   | 0.02528572  | 0.1039886   | 0.08067178  | 0.017123085 |            |
| 0.1454591   | 0.01917269  | 0.03692145  | 0.03403486  | 0.042401045 | 0.05428913  |            |
| 0.07172076  | 0           | 0.04151191  | 0.02476268  | 0.1122392   | 0.1464985   | 0.01496437 |
| 0.05520759  | 0.2142114   | 0.06213501  | 0.0497891   | 2.2959360   | 0.0961201   |            |
| 0.1592910   | 0.05198138  | 0.0591340   | 0.05350042  | 0.029389988 | 0.1680921   |            |
| 0.1295642   | 0.052231287 | 0.1290486   | 0.2135776   | 0.1379548   | 0.09462953  |            |
| 0.08425512  | 0.02510928  | 0.022521109 | 0.0567485   | 0.1114020   | 0.02884295  |            |
| 0.1432817   | 0.1339543   | 0.1342866   | 0.1235473   | 0.05779034  | 0.009346924 |            |
| 0.075830513 | 0.1482057   | 0.02840233  | 0.08223546  | 0.02231868  | 0.1064443   |            |
| 0.08433986  | 0.1525884   | 0.08984602  | 0.01046853  | 0.0123575   | 0.0212753   |            |
| 0.08488851  | 0.01201554  | 0.05262719  | 0.0592073   | 0           | 0.02659563  | 0.2001587  |
| 0.022871102 | 0.1065236   | 0.05255212  | 0.02809675  | 0.08346776  | 0.1145493   |            |
| 0.2593209   | 0.072618033 | 0.04741307  | 0.2438257   | 0.07409921  | 0.03527432  | 0          |
| 0.02848926  | 0.06190057  | 0.1811063   | 0.08610035  | 0           | 0.04954149  | 0.01178158 |
| 0.04405001  | 0.05666695  | 0.01764035  | 0.1793436   | 0.1775047   | 0.05015354  |            |
| 0.019392903 | 0.05974203  | 0.2893788   | 0.102877115 | 0.036826956 | 0.128692    |            |
| 0.028275361 | 0.06932992  | 0.04871743  | 0.2478356   | 0.115311738 | 0.2166701   |            |
| 0.09311077  | 0.2565763   | 0.093504807 | 0           | 0.1016175   | 0.1226078   | 0.1134821  |
| 0.2508891   | 0.08439484  | 0.04656402  | 0.2306768   | 0           | 0.1714665   | 0.02438192 |
| 0.036029464 | 0.3210729   | 0.092039146 | 0.2549103   | 0.1168628   | 0.1256166   |            |

|                     |                    |                   |                    |                    |                    |
|---------------------|--------------------|-------------------|--------------------|--------------------|--------------------|
| 0.04505408          | 0.08622373         | 0.06097927        | 0.04505792         | 0.0233415          | 0.1171005          |
| 0.031732497         | 0.08944437         | 0.2320115         | 0.08703213         | 0.1969844          | 0.09807861         |
| 0.03111034          | 0.06680335         | 0.2279912         | 0.0479666          | 0.2502811          | 0.02650469         |
| 0                   | 0                  | 0.199441621       | 0.06397565         | 0.0939192          | 0.2114560.03854595 |
| 0.01310614          | 0.07007019         | 0.1345221         | 0.2514284          | 0.08006581         | 0.104733541        |
| 0.115840399         | 0.1734867          | 0.6189058         | 0.1163595          | 0.2254508          | 0.07912661         |
| 0.05663661          | 0.04316104         | 0.03592962        | 0.2725038          | 0.07111598         | 0.1022003          |
| 0.03321816          | 0.09369789         | 0.04583922        | 0.06901979         | 0.05142296         | 0.07082303         |
| 0.1318185           | 0.096693116        | 0.4785221         | 0.04843881         | 0.04826747         | 0.04035435         |
| 0.01450872          | 0.1312137          | 0.2840596         | 0                  | 0.02043101         | 0.08798337         |
| 0.044499676         | 0.05023672         | 0.09580538        | 0.0405098          | 0.03174156         | 0.02380154         |
| 0.047273582         | 0.09635441         | 0.05102466        | 0.1739917          | 0.1333631          | 0.008588354        |
| 0.2071910.097743383 | 0.02047267         | 0.2692940.1422625 | 0.08970533         | 0.044677568        |                    |
| 0.1080619           | 0.1038814          | 0.07481795        | 0.106228145        | 0.119878744        | 0.03022227         |
| 0.06356355          | 0.06021662         | 0.1130088         | 0.02579424         | 0.02208696         | 0.1429562          |
| 0.03267501          | 0.02017769         | 0.09670174        | 0.03044894         | 0.08290589         | 0.049436108        |
| 0.0377939           | 2.2474670.05766889 | 0.0964486         | 0.1557432          | 0.05506519         |                    |
| 0.1040234           | 0.01809045         | 0.01792828        | 0.1791958          | 0.01006985         | 0.08585324         |
| 0.1237496           | 0.1987164          | 0.1186131         | 0.01414173         | 0.2887597          | 0.01548959         |
| 0.2833017           | 0.0938174          | 0.05783895        | 0.1106488          | 0.01450502         | 0.02423578         |
| 0.03928147          | 0.09961973         | 0.1958668         | 0.1135090.06016683 | 0                  | 0.1130157          |
| 0.1735897           | 0.1597736          | 0.02057003        | 0.02642708         | 0.08398828         | 0.1131082          |
| 0.1309617           | 0.02031662         | 0.03124279        | 0.2516363          | 0.04372199         | 0.08964112         |
| 0.06231571          | 1.2025580.04797668 | 0.07527699        | 0.105529257        | 0.06461006         |                    |
| 0.1254565           | 0.1798110          | 0.02618526        | 0.03079929         | 0.01083862         | 0.01253524         |
| 0.08614719          | 0.01512138         | 0.2778416         | 0                  | 0.1218837          | 0.04046443         |
| 0.1521620.0160211   | 0.02233757         | 0.07060604        | 0.0106608          | 0.07834938         |                    |
| 0.1065368           | 0.1649231          | 0.08049265        | 0.03593781         | 0.0698319          | 0.0830995          |
| 0.05072269          | 0.1334113          | 0.06671483        | 0.1369298          |                    |                    |
| AC005740.4          | 0.1547177          | 0.1590226         | 0.1073924          | 0.165345663        | 0.13070925         |
| 0.3121131           | 0.2276633          | 0.1699222         | 0.1093757          | 0.1478605          | 0.1764535          |
| 0.131801052         | 0.3142959          | 0.155259902       | 0.227181452        | 0.1248465          | 0.267484           |
| 0.7433853           | 0.03436072         | 0.3148663         | 0.098534656        | 0.4292030.08115727 | 0                  |
| 0.08403233          | 0.06006751         | 0.1475082         | 0.08041484         | 0.2597886          | 0.064393534        |
| 0.2929568           | 0.211939258        | 0.09077418        | 0.0407387          | 0.1304343          | 0.101039024        |
| 0.1684714           | 0.1549826          | 0.1596662         | 0.05336943         | 0.02562177         | 0.0203174          |
| 0.1107704           | 0.1558652          | 0.06023053        | 0.3544539          | 0.1748046          | 0                  |
| 0.03788023          | 0.1515451          | 0.06556373        | 0.08283826         | 0.102656936        | 0.2441029          |
| 0.1230040.3236893   | 0.06382405         | 0.04984064        | 0.1003660          | 0.06779159         |                    |
| 0.2018225           | 0.1070740.07371926 | 0.113030375       | 0.07777235         | 0.1574081          |                    |
| 0.1815629           | 0.116277324        | 0.0951468         | 0.05467681         | 0.1140914          | 0.181866599        |
| 0.2152877           | 0.1864610.07069531 | 0.1852858         | 0.06530801         | 0.2652538          |                    |
| 0.02362863          | 0.07660533         | 0                 | 0.1576721          | 0                  | 0.02936325         |
| 0.1554703           | 0.02388836         | 0.4424958         | 0.0577369          | 0.033650168        | 0.1053948          |



|             |             |             |             |             |                          |
|-------------|-------------|-------------|-------------|-------------|--------------------------|
| 0.01391068  | 0.1759990   | 0.340213462 | 0.1229294   | 0.1815385   | 0.06455269               |
| 0.1374986   | 0.01590709  | 0.2505773   | 0.1410708   | 0.1576339   | 0.2112695                |
| 0.06072929  | 0.170377515 | 1.3794640   | 0.062320252 | 0.06800483  | 0.1666503                |
| 0.09165976  | 0.03176817  | 0.1084244   | 0           | 0.09734042  | 0 0 0.1950303            |
| 0.1850771   | 0.2183021   | 0.07053842  | 0.02393136  | 0.2648585   | 0.1401451                |
| 0.1901317   | 0.7384843   | 0.07582473  | 0.128754146 | 0.2278656   | 0.1441658                |
| 0.1041092   | 0           | 0.318827505 | 0.0408218   | 0.1617876   | 0.03951121 0.01950886    |
| 0.09309941  | 0.1758258   | 0.1943949   | 0.08439154  | 0.05930345  | 0.1789696 0              |
| 0.04679759  | 3.4315550   | 0.4065519   | 0.09213552  | 0.3257210   | 0.1270423 0.07009476     |
| 0.1005718   | 0           | 0.03510945  | 0.1704913   | 0.019637217 | 0.1543753 0.1784401      |
| 0.1414538   | 0.04447192  | 0.1319879   | 0.1416037   | 0.02116796  | 0.2133554 0              |
| 0           | 0.06337544  | 0.1144598   | 0.1893273   | 0.1806375   | 0.1303634 0.1757066      |
| 0.028509737 | 0.1238231   | 0.05339163  | 0.1030593   | 0.06293307  | 0.2308818                |
| 0.05945431  | 0.1229318   | 0.2814925   | 0.1771118   | 0.09292011  | 0.09998504               |
| 0.2992054   | 0.1129360   | 0.09893031  | 0.3524494   | 0           | 0 0.08062817 0.128981543 |
| 0.4255241   | 0.4149146   | 0.05281719  | 0.3922636   | 0.1196298   | 0.01805481               |
| 0.058504183 | 0.1336930   | 0.07237129  | 0.04643138  | 0.06630982  | 0.180378868              |
| 0.09372133  | 0.08727204  | 0.2431782   | 0.09711256  | 0.04094016  | 0.124173                 |
| 0.04429479  | 0.1182952   | 0.1864177   | 0.1658045   | 0.1296677   | 0.1334717                |
| 0.1178503   | 0.145821658 | 0           | 0.6459807   | 0.04297595  | 0.230761735 0.1099634    |
| 0.053152952 | 0.06516433  | 0.3663225   | 0.3161394   | 0.027095849 | 0.1879862                |
| 0.07001307  | 0.2500921   | 0.146477837 | 0.03686321  | 0.1528192   | 0.2304822                |
| 0.05333182  | 0.1572099   | 0.1586482   | 0.1750652   | 0.2501734   | 0.1747808 0              |
| 0.2750036   | 0.203188105 | 0.4149498   | 0           | 0.3709848   | 0.02929101 0.0314851     |
| 0.3670080   | 0.02701437  | 0.03821028  | 0.1694027   | 0.3729640   | 0.059651789              |
| 0.07472909  | 0.1090357   | 0.1006805   | 0.1110893   | 0.1659343   | 0.1949408                |
| 0.02511582  | 0.0238103   | 0.2705076   | 0.2875196   | 0.02491219  | 0.09122244               |
| 0.1926247   | 0.0444273   | 0.168712606 | 0.1052306   | 0           | 0.2782513 0.02898398     |
| 0.1575993   | 0.04927472  | 0.1097669   | 0.01685861  | 0.04975194  | 0.1755954                |
| 0.196881548 | 0.027220073 | 0.2717717   | 0.1203558   | 0.2187365   | 0.1338347                |
| 0.0495816   | 0.1916412   | 0.1159079   | 0.2476528   | 0.1113612   | 0 0.02744564             |
| 0.01561115  | 0.06404959  | 0.2585102   | 0.04718025  | 0.1208332   | 0.1331355                |
| 0.1858476   | 0.14137425  | 1.0708830   | 0.06829265  | 0.1209797   | 0.2275783                |
| 0.05454795  | 0.8296737   | 0.2826977   | 0.03364649  | 0.09601719  | 0.2205254                |
| 0.07732816  | 0.033460781 | 0.4013557   | 0.1080589   | 0.07615164  | 0.05966882               |
| 0.02237146  | 0.059244287 | 0.1532640   | 0.1278904   | 0.2237884   | 0.1392780                |
| 0.03245704  | 0.367482436 | 0.2501537   | 0.1380621   | 0.2057152   | 0.04599028               |
| 0.033594543 | 0.06771275  | 0.1627331   | 0.1687743   | 0.11410923  | 0.0225352                |
| 0.1022631   | 0.01493611  | 0.0679183   | 0.1888335   | 0.0727333   | 0.207599                 |
| 0.2198730   | 0.06142355  | 0.01896534  | 0.3375972   | 0.01430973  | 0.1363681                |
| 0.037172647 | 0.02368207  | 0.7947760   | 0.1355098   | 0           | 0.1045612 0.186324       |
| 0.06518218  | 0.06801404  | 0.03370217  | 0.08421452  | 0.1892963   | 0.06052115               |
| 0.03101715  | 0.08301191  | 0.05574322  | 0.0265841   | 0.3502064   | 0.02911783               |
| 0.4399407   | 0.02519443  | 0.08154567  | 0.1323644   | 0.1090680   | 0.09111843               |

|             |             |             |             |              |             |
|-------------|-------------|-------------|-------------|--------------|-------------|
| 0.0492284   | 0.05618053  | 0.05664567  | 0.0533445   | 0.1508048    | 0.07004873  |
| 0.1931370   | 0.05438659  | 0           | 0.1546729   | 0.1159165    | 0.2210375   |
| 0.04476111  | 0.1527674   | 0.02936561  | 0.06450467  | 0.2876651    | 0.1179572   |
| 0.6560014   | 1.9228160   | 0.3382055   | 0.1415081   | 0            | 0.1214561   |
| 0.03316182  | 0.1312638   | 0.038598344 | 0.14262356  | 0.09425663   | 0.107961543 |
| 0.1705540   | 0.04974244  | 0           | 0.1078216   | 0.06085309   | 0.06802559  |
| 0.2108189   | 0.1049772   | 0.1516886   | 0.1002026   | 0.036820934  | 0.02861019  |
| 0.2384829   | 0.1260939   | 0.4728995   | 0.1312723   | 0.1735702    | 0.04767509  |
| 0.02279918  | 0.1003302   | 0.1544431   |             |              |             |
| FENDRR      | 3.04628     | 31.355194   | 2.27444     | 24.581855839 | 1.495726436 |
|             | 13.47809    | 19.34162    |             |              |             |
| 21.81541    | 38.54169    | 19.15287    | 3.810564    | 19.969762218 | 23.504769   |
|             | 1.55868858  |             |             |              |             |
| 20.35343    | 9565        | 10.22641    | 3.6267993   | 6.5185       | 6.30564     |
|             | 0.2660724   | 2.41931     | 2.2209      |              |             |
| 0.3438006   | 0.6103672   | 0.002371998 | 0.5148232   | 1.452272     | 0.3947229   |
| 0.7814618   | 0.3439303   | 0.051391631 | 7.3909871   | 7.47331035   | 0.4270033   |
| 0.7458869   | 1.491661    | 1.32815388  | 2.0702080   | 9.167581     | 1.9732522   |
|             | 9.23914     |             |             |              |             |
| 0.4294164   | 0.008584436 | 0.4628231   | 4.0516890   | 3.986916     | 0.3494461   |
| 1.0394812   | 2.2242211   | 7.077373    | 0.729640    | 2.408761     | 7.396711    |
|             | 9.211410    | 1.64822169  |             |              |             |
| 0.2784713   | 0.5428106   | 0.6284636   | 0.03146117  | 0.6715321    | 5.042816    |
| 0.3909192   | 0.9102131   | 1.1831680   | 3.091438    | 0.1384338    | 0.58502576  |
| 0.2665320   | 7.241931    | 0.3931559   | 3.26544715  | 0.1876051    | 0.3388273   |
| 0.3856440   | 0.032932135 | 1.2007070   | 5.777411    | 0.2986994    | 0.3504245   |
|             | 1.720008    |             |             |              |             |
| 0.3694295   | 2.8186710   | 9.548271    | 0.7480377   | 0.6809950    | 1.81980025  |
|             | 0.1550808   |             |             |              |             |
| 0.1831826   | 0.1532738   | 0.9622209   | 0.1537241   | 0.08402652   | 0.777237175 |
| 0.08658814  | 0.06465244  | 0.5019469   | 0.681461666 | 2.2637050    | 9.423516    |
| 1.1682610   | 5.551342    | 0.06048909  | 0.5103624   | 0.6516785    | 0.4503628   |
| 0.1115811   | 0.04846725  | 0.249556046 | 0.7411505   | 1.269755646  | 0.3495869   |
| 0.1369132   | 6.2093520   | 5.055837    | 1.0449290   | 5.193281     | 0.9185240   |
|             | 1.883242    |             |             |              |             |
| 0.1572947   | 0.09064389  | 0.4505701   | 0.2869572   | 0.2781674    | 1.715567    |
| 0.02072354  | 0.5408179   | 3.5346870   | 6.882835    | 11.031482    | 2.275765051 |
|             | 0.0385108   |             |             |              |             |
| 4.8526920   | 0.02199393  | 3.8566431   | 0.49614633  | 0.8767675    | 0.9759997   |
|             | 0.9237425   |             |             |              |             |
| 0.4066457   | 0.4163065   | 0.6141249   | 0.2372791   | 0.01584748   | 0.3716742   |
| 0.6900107   | 0.2204362   | 0.5096978   | 39.186860   | 2.417572     | 0.5547351   |
| 6.1196140   | 2.952262    | 0.006581377 | 1.63245     | 0.105044879  | 1.5625492   |
|             | 6.03565     |             |             |              |             |
| 0.024891148 | 0.5777171   | 0.08795953  | 0.4382882   | 4.47205      | 0.5651065   |
| 0.1595465   | 1.123939252 | 0.03380482  | 0.06636166  | 0.4734488    | 0.0290086   |
| 1.9408951   | 4.102630    | 4.639914    | 1.2331964   | 9.517360     | 1.28488918  |
|             | 2.1711680   | 0.09023538  |             |              |             |
| 0.1016033   | 0.0118179   | 1.1424350   | 7.787334    | 0.9176190    | 4.757409    |
|             | 4.08531     |             |             |              |             |
| 0.3173542   | 2.1967571   | 3.824640    | 6.394122    | 0.04876631   | 4.5954871   |
|             | 1.1852950   | 0.1760322   |             |              |             |
| 0.007570386 | 2.001244966 | 2.1292890   | 2.532231    | 1.0860520    | 8.452631    |
|             | 1.101893    |             |             |              |             |
| 0.2263109   | 0.074156958 | 0.05962568  | 0.9615104   | 0.3182480    | 2.288055    |
| 8.650182121 | 0.6958077   | 1.8846650   | 9.418460    | 0.03191352   | 0.1095533   |
|             | 0.2470233   |             |             |              |             |
| 0.1341262   | 2.9039360   | 1.575291    | 3.4140210   | 1.716651     | 0.8365109   |
|             | 0.5112156   |             |             |              |             |
| 0.364538049 | 0.01807647  | 0.3447632   | 0.323818567 | 0.572003834  | 3.007598    |
| 0.052402005 | 0.4650019   | 8.9512880   | 0.05858514  | 0.022896889  | 0.9266518   |

|              |             |             |             |             |             |             |
|--------------|-------------|-------------|-------------|-------------|-------------|-------------|
| 0.00246514   | 0.2364952   | 0.226927474 | 2.9956520   | 5057875     | 1.4548360   | 0.1502239   |
| 0.08856502   | 0.1468309   | 0.4068236   | 0.1573791   | 0.4578561   | 0.1051284   |             |
| 3.7999610    | 4.73766682  | 0.3347079   | 0.319825873 | 4.6392833   | 8.262260    | 0.04434325  |
| 0.1789234    | 0.4489513   | 1.8189442   | 1.552167    | 1.1406940   | 0.1894614   | 6.684626001 |
| 1.3287510    | 0.2879337   | 0.3509483   | 0.2060017   | 1.07502     | 0.2004232   | 4.173995    |
| 0.03353415   | 9.2937890   | 0.0441752   | 0.1859561   | 7.280110    | 0.4883227   | 0.7883933   |
| 0.158408598  | 1.0691970   | 0.01243272  | 0.02799186  | 0.02041035  | 0.4439221   |             |
| 0.09368724   | 0.04328643  | 0.1733273   | 0.6376375   | 0.8373093   | 0.154047618 |             |
| 0.199349479  | 1.8525590   | 0.1243057   | 16.868321   | 0.0901070   | 0.3700998   | 3.259856    |
| 0.2971030    | 0.05073329  | 1.3833280   | 0.2133863   | 1.9327060   | 0.008794623 | 0.349551    |
| 6.1651350    | 0.2259236   | 0.1974089   | 2.0789780   | 0.2181213   | 3.012247896 | 1.088934    |
| 0.04167912   | 3.8762910   | 0.4558488   | 0.1267608   | 0.1073759   | 0.4512346   |             |
| 0.0142162    | 1.2468160   | 0.1048226   | 0.1633621   | 0.438269748 | 13.197270   | 0.03043777  |
| 0.6721069    | 0.7311209   | 0.04096002  | 0.667511795 | 1.04003     | 0.1238321   |             |
| 0.6036928    | 0.2550048   | 1.9691080   | 0.1737061   | 0.991986251 | 2.2683582   | 1.61581     |
| 0.2781378    | 0.1187490   | 0.721541077 | 0.3719268   | 0.6921579   | 3.1059440   | 0.028124273 |
| 0.285644848  | 0.2832514   | 0.0399681   | 0.8545212   | 0.5784433   | 0.8331522   |             |
| 0.3567037    | 0.7707259   | 0.08362461  | 0.5448955   | 0.4718105   | 0.01813829  |             |
| 0.1152355    | 0.366474704 | 0.02001214  | 3.5465830   | 0.6756108   | 1.2558631   | 1.142759    |
| 3.8458620    | 0.09180184  | 4.3991650   | 0.3987123   | 1.17816     | 0.3839080   | 0.3352667   |
| 0.00218421   | 1.3503450   | 0.1334638   | 0.2452368   | 2.9840220   | 0.03280738  | 0.7174403   |
| 0.1011281    | 1.6538110   | 0.8948184   | 0           | 0.5133206   | 0.1317321   | 0.4641942   |
| 0.3350723    | 0.04507787  | 0.2230113   | 1.2307310   | 0.5249830   | 0.3829872   | 1.34422     |
| 0.0435679    | 0.06763441  | 16.806111   | 0.9036960   | 0.1607546   | 0.02689449  | 0.6865458   |
| 0.2574016    | 22.745950   | 0.7452099   | 0.7688209   | 8.1754510   | 0.8224541   | 0.8142765   |
| 2.020938336  | 0.2480332   | 0.1932512   | 0.4125817   | 2.07836     | 2.6621330   | 0.179392831 |
| 14.095291636 | 0.3318749   | 0.186263452 | 0.2121822   | 0.04553685  | 17.86959    |             |
| 0.5523715    | 0.4778042   | 0.8878066   | 1.07965     | 1.75604     | 0.3711003   | 0.9667053   |
| 0.1439467    | 0.261883813 | 0.9307975   | 0.7993862   | 0.7742892   | 0.09990393  |             |
| 1.1324050    | 0.4229059   | 0.6804031   | 0.4752296   | 3.1404791   | 0.322013    |             |
| AC234772.2   | 3.0005570   | 0.0576457   | 0.3892975   | 1.378569469 | 2.398718974 | 2.393368    |
| 0.09169773   | 1.0119480   | 0.8039917   | 0.2132146   | 0.191111526 | 0.3702799   |             |
| 0.281408573  | 0.102941596 | 1.3124490   | 0.04407406  | 0.5389544   | 1.3389940   |             |
| 0.357188129  | 0           | 0.1765171   | 0.15263     | 0.2284629   | 0           | 0.1188261   |
| 0            | 0           | 0.3539894   | 0.147746117 | 0.03290564  | 0.2584361   | 0.1418473   |
| 0.06104441   | 0.07633859  | 0.1685436   | 0.1446975   | 0.3869284   | 0.04643946  |             |
| 0.8838067    | 0           | 0.04035795  | 1.25543     | 0.03779104  | 0.4928519   | 0           |
| 0.8925528    | 0.1961968   | 0.02376685  | 0.1501443   | 0.111639418 | 2.78735     |             |
| 0.07431492   | 0.04190621  | 0.2313622   | 0.3011205   | 0.04547835  | 0.1622859   | 0           |
| 0            | 0.1455538   | 0.04453872  | 0.307301333 | 0.7987869   | 0.03170024  | 0.0822707   |
| 0.54795689   | 0.08622679  | 0.09910172  | 0.03446511  | 0.188361834 | 0.07804179  |             |
| 0.09656018   | 0.04271175  | 0           | 0           | 0           | 0.06942358  | 0           |
| 0.05482408   | 0           | 0.04329765  | 0           | 0           | 0.67090023  | 0           |
| 0.274060844  | 0           | 0.6110717   | 0.05850088  | 0.08307208  | 0.08649481  | 0.3144263   |

|             |             |             |             |             |             |             |               |
|-------------|-------------|-------------|-------------|-------------|-------------|-------------|---------------|
| 0.05113816  | 0           | 0.03191049  | 0           | 0.061761849 | 0.8334264   | 0.075303638 |               |
| 0.06162938  | 0.1510269   | 0           | 0           | 0.05614834  | 0           | 0.04410738  | 0.04572839 0  |
| 0.2120955   | 0.04792174  | 0.4616179   |             | 0.2557018   | 0.2168780   | 0.02666978  | 0             |
| 0.5599973   | 0           | 0.1374323   | 0 0         | 0           | 0.06289932  | 0.1159635   | 0.144468713   |
| 0.1109843   | 0           | 0           | 0.8486356   | 0           | 0.2549474   | 0.05872346  | 0.458879      |
| 0.1881031   | 0.08109559  | 0.1693650   | 0.05654709  | 56.426090   | 0.04093751  | 0           |               |
| 0.3542216   | 0.08634909  | 0           | 0           | 0.150206218 | 0           | 0.6180309   | 0.10677737    |
| 0.07994435  | 0           | 0.04273084  | 0           | 0.04784563  | 0.1711045   | 0.153467712 |               |
| 0.04833833  | 0.04744607  | 0           | 0.08615099  | 0           | 0.4575409   | 0.5300852   |               |
| 0.03938062  | 0.1910809   | 0.723434585 | 0.05610733  | 0.04838616  | 0.3735899   | 0           |               |
| 0.05579643  | 0.1436813   | 0.1114069   | 0.05102051  | 0.03566836  | 4.084129    |             |               |
| 0.1449783   | 0.09038496  | 0           | 0           | 0.1008655   | 0.3245518   | 0.1359248   | 0             |
| 0.038963174 | 0           | 0           | 0.04786558  | 0.07109777  | 0.1300974   | 0.03272434  |               |
| 0.247423941 | 0.2019321   | 0           | 0.2805229   | 0.1802798   | 0.16346835  | 0.6066782   |               |
| 0           | 0.04407606  | 0.1466804   | 0.03710202  | 0.02813294  | 0.1204265   | 0.1715281   |               |
| 0.09653772  | 0.1202083   | 0.2350227   | 0.1209587   | 0.0854415   | 0.594678948 |             |               |
| 0.116315922 | 1.17084     | 0           | 0.125476693 | 0           | 0.144509589 | 0           | 0.1106599 0   |
| 0.049111225 | 0.3407251   | 1.0786390   | 0           | 0.06681456  | 0.06924618  | 0.03797719  |               |
| 0.3866557   | 0.2279543   | 2.0539270   | 0.1586528   | 0           | 1.3938770   | 0.03074842  |               |
| 0.05538268  | 0.12275948  | 0.1367448   | 0.117598312 | 0.2241367   | 0.02654497  |             |               |
| 0.2282669   | 0.05116938  | 0           | 0           | 0.3070424   | 0.43741     | 0.08866324  | 0.14415849    |
| 0           | 0           | 0.04562086  | 0.1006747   | 0.03341732  | 0.1766651   | 2.9134360   | 0.04315616    |
| 0.3541019   | 0           | 0           | 0.1653407   | 0.2793058   | 0           | 0.033976844 | 0.08174162 0  |
| 0.1801181   | 0.02626673  | 0           | 0           | 0.03979049  | 0           | 0.04508769  | 0 0.832644879 |
| 0.098672764 | 0           | 0           | 0.2202555   | 0.1617169   | 0           | 0.07718883  | 0.02100831    |
| 0.1224193   | 1.1706850   | 0.1615374   | 0.2487261   | 0.1697712   | 0.02902247  |             |               |
| 0.2342749   | 0.4275710   | 0.08760407  | 0.09049051  | 0.03742764  | 0.256240827 |             |               |
| 0.0388195   | 0.3713413   | 0.02740946  | 0.2291587   | 0           | 0.0406428   | 0.1707965   |               |
| 0.1829528   | 0.1044187   | 0           | 0.05606292  | 0           | 0.1283748   | 0.1958567   |               |
| 0.4600829   | 0.07209983  | 0.4460310   | 0.080535203 | 0.6565969   | 0.08692553  | 0           | 0             |
| 1.1412260   | 0.05882839  | 0.444041276 | 0.1046316   | 0.1668251   | 0.03728587  | 0           |               |
| 0.213115383 | 0.06136468  | 0.5309166   | 0.1019678   | 0           | 0.081690099 | 0.06178394  |               |
| 0.2977886   | 0.6155096   | 0.08556518  | 0.04394303  | 0.3762732   | 0           | 0.2226604   |               |
| 0           | 0.1882753   | 0.02593639  | 0           | 0           | 0.1287713   | 17.892920   | 0.1964893     |
| 0.1493725   | 0.1516137   | 0.1125708   | 0           | 0.06163772  | 0.06108518  | 0           |               |
| 0.1029299   | 0           | 0           | 0.07522955  | 0.2525865   | 0.1927347   | 0           | 0.05277607    |
| 0.04196803  | 0.2054921   | 0.09853435  | 0.1370917   | 0           | 0.08257607  | 0           |               |
| 0.2375968   | 0           | 0.04834345  | 0           | 0.03174083  | 0           | 0.1971514   | 0.06048669 0  |
| 0.1200564   | 0.05723293  | 0.1651636   | 0           | 0.1730569   | 0.05322516  | 0           |               |
| 0.3724236   | 0.06108499  | 0.1273931   | 0           | 0.1225995   | 0.0366405   | 0.239705977 |               |
| 0.1926218   | 0           | 0.08168686  | 0.1803174   | 0           | 0.069959498 | 0.221575887 |               |
| 0.1281301   | 0.391360592 | 0.05152152  | 0           | 2.7875080   | 0.09771332  | 0.02757406  |               |
| 0.2054940   | 0.4147568   | 0           | 0           | 0.03436696  | 0.03632346  | 0.066737943 | 0             |
| 0.7780504   | 0.09141811  | 0.4897888   | 0           | 0.06291919  | 0.08641109  | 0.2479411   |               |

0.09092423 0.2799281  
AL590729.1 0.07752088 0 0 0 0.027288122 0.1202949 0 0 0.04566866  
0.08980012 0 0.132077075 0.2624618 0 0.047428589 0.2502159  
0.1624510 0 0.2253755 0.054856118 0.3136159 0.2168726 0.08438601  
0.5964756 0.1337629 0.2463619 0.4566384 0.4338878 0.035849105  
0.06523784 0.299514642 0 0.3402001 0.1307074 0.056250347 0.3165454  
0 0.3333344 0 0.08558477 0.06786649 0.1850040.3346963 0.1005945  
0.2785853 0.03243902 0.04102058 0.2115033 0.2530637 0.03615774  
0.08760138 0.1844705 0.171453207 0.08153803 0.4108720.1158454  
0.2131924 0.1664834 0.1676270.2492349 0 0.04213442 0.1341229  
0.04104091 0.2359731 0 0.4089497 0.03790483 0 0.1191826  
0.09131887 0.4446179 0.08678451 0.3835352 0.1334654 0.4329317  
0.3094564 0.5453732 0.04922394 0.1183906 0.2558859 0.1232043  
0.1097238 0 0.1716444 0.1262963 0.2596599 0.03989731 0.1970767  
0 0.028100533 0.2640388 0.2090972 0.1469730.126268871 0.4619506 0  
0 0 0.1062694 0.3541183 0.1884883 0.1504420.2058310.1352366  
0.056911442 5.5464790 0.05678937 0.2783322 0.06123448 0.05305783  
0.1810857 0.1502079 0.0812869 0.1264115 0.1793558 0.06514625 0  
0.2430658 0.1178102 0.1598766 0.04915059 0.2106579 0.2778561 0  
0 0.107519823 0.07611427 0.0601949 0 0.07123759 0 0.1022682  
0.04503513 0.2639597 0.0977486 0.1554906 0.2936567 0.02705583 0  
0.2723767 0.2241805 0.2731121 0.07815933 3.3087550.03772252  
0.0384702 0 0.07956774 0.07804617 0.1679708 0.092273279 0.2345532  
0.1220345 0.098391712 0.4051630 0.1181250.0742751 0.1322644 0  
0.247476729 0.04454213 0.08743989 0.8150021 0.2116939 0.07646637  
0.2108042 0.2011287 0 0.05869151 0.095231479 0.1034020.0891724  
0.2581878 0.03503604 0.1542435 0 0.4448499 0.2350683 0.1643359  
0.1551912 0.1001944 0.09994399 0 0.04130729 0.06196273 0.1495317  
0.1252501 0.3590979 0 0.1254162 0.1649935 0.0882130 0.07992021  
0.2713893 0 0.1860735 0.08058095 0.05169846 0.1107478 0  
0.04472267 0.09717201 0.3249167 0.2973542 0.2051295 0.5443944 0  
0.07902864 0.04447811 0 0.5630701 0.0835945 0.3542915 0.121772536  
0.160771746 0.1135673 0.10766488 0 0 0 0.07255644 0.2549234  
0.4168440.135762969 0.3662943 0.08769962 0.1491761 0.146784597 0  
0.1276160.03499468 0.3117538 0.1575391 0.03785248 0 0.1114210  
0.1700017 0.2041330.263943594 0.2520114 0.072241895 0.2065343  
0.3179838 0.1051701 0.3772067 0.04511823 0.1276343 0.4715486 0  
0.1225502 0 0.3744280.3186868 0.1471333 0.2473822 0.03079292  
0.03255818 0.1258421 0.1193008 0.0501989 0.7857866 0.04160727  
0.1523558 0 0 0.093925517 0.2259664 0 0.09958359 0.1210195  
0.3948234 0 0.03666558 0.1970957 0.2492807 0.2932719 0.073071802  
0.090923594 0.03026009 0.1340087 0.2435495 0.1862707 0.1242136  
0.03556344 0.07743378 0 0.2603870.07442562 0.04583853 0.0782192  
0.2406890.1439175 0.2560949 0 0.1389732 0.03448829 0.202386173

|                    |             |             |                   |                     |                    |                   |             |             |
|--------------------|-------------|-------------|-------------------|---------------------|--------------------|-------------------|-------------|-------------|
| 0.5007919          | 0.07603963  | 0.05051378  | 0                 | 0                   | 0                  | 0.7344548         | 0           | 0.09621827  |
| 0.1381170.4907707  | 0           | 0.07886201  | 0.1203168         | 0.1695803           | 0.06643754         |                   |             |             |
| 0.03736385         | 0.247368163 | 0           | 0.05339928        | 0.4600144           | 0.09304646         | 0.1617848         |             |             |
| 0.2710418          | 0.204584462 | 0.09641447  | 0.4227399         | 0.06871532          | 0.153622           |                   |             |             |
| 0.056108164        | 0.1696364   | 0.05435795  | 0.1409398         | 0.047645084         | 0.075274646        | 0                 |             |             |
| 0.09978258         | 0           | 0.0394227   | 0.04049201        | 0                   | 0.2448150.03419566 | 0.1583755         |             |             |
| 0                  | 0.1672965   | 0.1301463   | 0                 | 0                   | 3.49316            | 0.09052908        | 0.05505665  |             |
| 0.1397068          | 0.4149205   | 0.1814408   | 0.02839853        | 0.05628791          | 0.2344191          |                   |             |             |
| 0.2213082          | 0.06738655  | 0.3108211   | 0.2079644         | 0.2327498           | 0.06659943         |                   |             |             |
| 0.1462249          | 0           | 0.3093769   | 0.1262360.1361941 | 0.2842320.04554018  |                    |                   |             |             |
| 0.1521821          | 0.04110958  | 0           | 0.1419107         | 0                   | 0.06296692         | 0.2632329         |             |             |
| 0.1935415          | 0.3179195   | 0.3344186   | 0                 | 0.0829709           | 0.05273819         | 0.3043854         |             |             |
| 0.3737904          | 0           | 0.09809035  | 0.6823086         | 0.2059054           | 0.1125755          | 0.1956474         |             |             |
| 0.1301921          | 0.3765709   | 0.1350519   | 0.2208809         | 0.07606904          | 0.1790387          |                   |             |             |
| 0.07527166         | 0           | 0.08221166  | 0                 | 0.034029107         | 0                  | 0.090156367       | 0           | 0.2076942   |
| 0                  | 0.2926284   | 0.1016342   | 0.07574228        | 0.1592435           | 0                  | 0.1577956         |             |             |
| 0.06333596         | 0.1673541   | 0.061496743 | 0                 | 0.1991519           | 0.04211934         | 0.05641546        |             |             |
| 0.1918397          | 0.2898895   | 0.2388746   | 0.6473297         | 0.1675672           | 0.2292838          |                   |             |             |
| RASA3-IT1          | 0.03896444  | 0           | 0.5859952         | 0                   | 0.041147616        | 1.8139210.3822347 |             |             |
| 0.1834010.06886353 | 0           | 0           | 5.244502602       | 2.8495060.111717088 | 0                  | 4.779124          |             |             |
| 0.1837192          | 0.2995452   | 0.7788128   | 0                 | 0                   | 0                  | 0                 | 0.04127643  |             |
| 0                  | 0.06542572  | 0           | 0.0491859         | 0.041057868         | 0                  | 0                 | 0.169639203 |             |
| 0.05303523         | 0           | 0           | 0                 | 0                   | 0                  | 0.1121526         | 0           | 0.3913170   |
| 0.1907967          | 0           | 0           | 0.3477027         | 0                   | 0                  | 0                 | 0           | 0.0751640   |
| 0.1270685          | 0           | 0           | 0.071164519       | 0                   | 0                  | 0                 | 0           | 0.1376992   |
| 0                  | 0           | 0           | 0.05482435        | 0                   | 0                  | 0                 | 0           | 0.1142649   |
| 0.1485854          | 0           | 0           | 0.04423808        | 0                   | 0                  | 0                 | 0.2321910   | 0.08128543  |
| 0                  | 0           | 0           | 0                 | 0.042908232         | 0.1286693          | 0                 | 0           | 0.1398986   |
| 0.08000562         | 0           | 0.07549924  | 0                 | 0                   | 0                  | 0                 | 0.0665860   | 0.1184303   |
| 0                  | 0.05985396  | 0           | 0                 | 0                   | 0                  | 0.04538378        | 0           | 0.0665860   |
| 0                  | 0           | 0.07084447  | 0                 | 0                   | 0                  | 8.8202880         | 0           | 1.0663930   |
| 0.3166028          | 0           | 0           | 0.4293688         | 0                   | 0                  | 0                 | 0.05937337  | 0.06648024  |
| 0                  | 0           | 0           | 0                 | 0.03990151          | 0.05765162         | 0.05297842        | 0           | 0.04425031  |
| 0                  | 0.2016939   | 0.04325778  | 0                 | 0                   | 0                  | 0.05159899        | 0           | 0.04425031  |
| 0                  | 0           | 0           | 0                 | 0                   | 0                  | 0                 | 0           | 0.05611586  |
| 0.06075379         | 0.03897792  | 0           | 0                 | 0                   | 0                  | 0.06124252        | 0           | 0.05611586  |
| 0.08937516         | 0           | 0           | 0.06531157        | 0.1680689           | 0.05935936         | 0.091810083       | 0           | 0.05611586  |
| 0                  | 0           | 0.05538682  | 0                 | 0                   | 0                  | 0                 | 0           | 0.2886472   |
| 0.0335780          | 0           | 0           | 0                 | 0                   | 0                  | 0.1539055         | 0.056857022 | 0.2886472   |
| 0.07109851         | 0           | 0           | 0.07110456        | 0.2762589           | 0                  | 0.951446034       | 0           | 0.056857022 |
| 0                  | 0           | 0           | 0                 | 0.1892366           | 0                  | 0                 | 0           | 0.094419862 |
| 0                  | 0           | 0           | 0                 | 0                   | 0                  | 0                 | 0           | 0.094419862 |
| 0.0291905          | 0           | 0.05609089  | 0                 | 0                   | 0                  | 1.7361            | 0.02970493  | 0.05617533  |
| 0.508628409        | 0           | 0           | 0                 | 0.063682            |                    |                   |             |             |

|             |             |             |             |             |             |            |            |             |           |            |             |   |
|-------------|-------------|-------------|-------------|-------------|-------------|------------|------------|-------------|-----------|------------|-------------|---|
| 0           | 0           | 0           | 0           | 0           | 0           | 0          | 0          | 0           | 0.2439545 | 0          | 0.051415306 | 0 |
| 0.05794976  | 0           | 0           | 0           | 0           | 0           | 0          | 0          | 0.143687543 | 0         | 0.02861572 | 0           |   |
| 0.05701563  | 0           | 0.1221154   | 0           | 0.1230518   | 0           | 0          | 0.1308018  | 0           | 0         | 0          | 0           |   |
| 0           | 4.2138540   | 0.06825416  | 0           | 0           | 0           | 0          | 0.08487625 | 0           | 0         | 0.05080591 |             |   |
| 0           | 0           | 0           | 0           | 0           | 0           | 0.06845545 | 0          | 0           | 0         | 0          | 0           |   |
| 0           | 0           | 0           | 0.08404467  | 0           | 0           | 0          | 0          | 0.07395496  | 0         | 0.05174728 |             |   |
| 0.04243799  | 0           | 0           | 0           | 0           | 0           | 0.1529388  | 0          | 0           | 0         | 0.04132218 | 0           |   |
| 0.051312311 | 0           | 0.067973155 | 0           | 0           | 0           | 0.03394252 | 0.03831343 | 0.1713171   |           |            |             |   |
| 0           | 0           | 0.02643768  | 0           | 0           | 0.046365308 | 0.07205251 | 0          | 0           | 0         | 0.04132487 |             |   |
| 0           | 0           | 0           | 0           | 0           |             |            |            |             |           |            |             |   |
| LINC00702   | 0.2073127   | 20.384      | 0.1060312   | 6.548653298 | 0.357198906 | 0.2438166  |            |             |           |            |             |   |
| 2.8471841   | 1.5030681   | 1.2920162   | 6.542980    | 0.0954045   | 0.371801347 | 2.6886340  | 5.06802057 |             |           |            |             |   |
| 8.179009411 | 0.2676591   | 0.06516595  | 0.1006578   | 0.06058071  | 0.06978834  |            |            |             |           |            |             |   |
| 0.060224498 | 0.1778290   | 0.1602572   | 0.1211502   | 0.03555738  | 0.8613513   |            |            |             |           |            |             |   |
| 0.01618206  | 0.01361067  | 0.1538975   | 0.442013921 | 0.7988631   | 0.080481894 |            |            |             |           |            |             |   |
| 0.0307281   | 0.03160326  | 0.3385101   | 0.052254375 | 0.4306914   | 0.1573902   |            |            |             |           |            |             |   |
| 0.09571145  | 1.94964     | 0.7444551   | 0.0716424   | 0.1354061   | 1.1526020   | 1.529154   |            |             |           |            |             |   |
| 0.0529353   | 0.1177988   | 0.01385691  | 0.02232708  | 0.05877158  | 0.07328536  |            |            |             |           |            |             |   |
| 0.02959209  | 0.1908393   | 0.020271152 | 0.04820178  | 0.02313237  | 0.04891631  |            |            |             |           |            |             |   |
| 0.07201723  | 0.08201485  | 0.8352198   | 0.05051553  | 0.4398410   | 0.06049099  |            |            |             |           |            |             |   |
| 0.4002139   | 0.05892108  | 0.127540244 | 0.1791687   | 0.03700308  | 0.0352121   |            |            |             |           |            |             |   |
| 0.478894628 | 0.04697041  | 0.1079676   | 0.008046091 | 0.076954901 | 0.1477791   |            |            |             |           |            |             |   |
| 0.1728264   | 0.4254430   | 0.1493366   | 0.4175862   | 0.01247103  | 0.3032787   |            |            |             |           |            |             |   |
| 0.01080491  | 0.7179260   | 0.1130487   | 0.313636496 | 0.4949191   | 0.5588905   |            |            |             |           |            |             |   |
| 0.1206069   | 0.02695494  | 0.03744747  | 0.05157603  | 0.598025732 | 0.02725352  |            |            |             |           |            |             |   |
| 0.1785468   | 0.01861802  | 0.085308254 | 0.07802437  | 0.6620815   | 0.4689037   |            |            |             |           |            |             |   |
| 0.02585825  | 0.08974554  | 0.2256517   | 0.0676516   | 0.03176243  | 0.02731557  |            |            |             |           |            |             |   |
| 0.1684578   | 0.305195472 | 0.3891370   | 0.363322018 | 0.1055102   | 0.05484601  |            |            |             |           |            |             |   |
| 0.7860395   | 0.07617337  | 0.01966226  | 0.09725326  | 0.2745904   | 0.02135115  |            |            |             |           |            |             |   |
| 0.02423485  | 0.5419141   | 0.1230639   | 0.07697682  | 0.04642956  | 0.0506315   |            |            |             |           |            |             |   |
| 0.05396061  | 0.005930091 | 1.4012090   | 0.006127093 | 0.3850131   | 0.513028816 |            |            |             |           |            |             |   |
| 0.02356906  | 0.04320991  | 0.3181584   | 0.3218606   | 0.427210061 | 0.1871275   |            |            |             |           |            |             |   |
| 0.6883903   | 0.3789583   | 0.4485199   | 0.2757581   | 0.1735972   | 0.009139568 |            |            |             |           |            |             |   |
| 0.1150635   | 0.05855177  | 0.02524302  | 3.4563930   | 0.04620443  | 0.1496934   |            |            |             |           |            |             |   |
| 0.02867134  | 0.09421654  | 0.2894332   | 0.02015873  | 0.1548903   | 0.04610222  |            |            |             |           |            |             |   |
| 0.019481426 | 0.01485619  | 0.07557687  | 0.12463917  | 0.2052985   | 0.08179709  |            |            |             |           |            |             |   |
| 0.03990311  | 1.6998760   | 0.05957257  |             |             |             |            |            |             |           |            |             |   |

|             |             |             |             |             |             |
|-------------|-------------|-------------|-------------|-------------|-------------|
| 0.002887232 | 0.01094635  | 0.04060954  | 0.1868733   | 0.003756221 | 0.1356396   |
| 0.02926266  | 0.05177069  | 0.07313843  | 0.462771532 | 0.099567115 | 0.00959087  |
| 0.109108875 | 0.38081298  | 0.4497883   | 0.056227754 | 0.09191196  | 1.489774    |
| 0.1431584   | 0.156692676 | 0.004419131 | 0.2814402   | 0.0352746   | 0.549560665 |
| 0.1559827   | 0.06466379  | 0.4255684   | 0.1579675   | 0.004434778 | 0.0639336   |
| 0.1419808   | 0.02117163  | 0.2958264   | 0.02871363  | 0.08404127  | 0.121004481 |
| 0.03192392  | 0.183026997 | 0.1395362   | 0.9254317   | 0.1332258   | 0.05176516  |
| 0.01143084  | 0.005389423 | 0.2946883   | 0.6343573   | 0.006899659 | 0.10096406  |
| 0.2213457   | 0.06920594  | 0.1668574   | 0.002611459 | 0.2080394   | 0.03024527  |
| 0.3329947   | 0.03022521  | 0.2077280   | 0.02580685  | 0.02108265  | 0.4342477   |
| 0.2282198   | 0.1033941   | 0.031728413 | 0.08057302  | 0.1245104   | 0.07008278  |
| 0.2493733   | 0.01852401  | 0.003475012 | 0.04644668  | 0.03804554  | 0.1017513   |
| 0.08845394  | 0.018512959 | 0.011517882 | 0.2964374   | 0.05092727  | 6.314376    |
| 0.2516920   | 0.2587524   | 2.0513      | 3.5312540   | 0.1428977   | 0.8419007   |
| 0.2325568   |             |             |             |             |             |
| 0.1277466   | 0.2356029   | 0.2303661   | 0.1215398   | 0.006654605 | 0.3442704   |
| 0.04929299  | 0.1368908   | 0.136733709 | 0.1208353   | 0.09311353  | 2.158565    |
| 0.06419821  | 0.2538952   | 0.1454874   | 0.3367095   | 0.04745717  | 0.02166861  |
| 0.06762254  | 0.05427452  | 0.5061581   | 0.08128702  | 0.7661854   | 0.3815287   |
| 0.2776765   | 0.480481212 | 0.9885020   | 0.2570485   | 0.04127672  | 0.4203958   |
| 0.1024717   | 0.009155899 | 0.918579713 | 0.4423982   | 0.0811382   | 0.1537815   |
| 0.1751426   | 0.19901239  | 0.03820256  | 0.1560798   | 1.2338930   | 0.016094699 |
| 0.181175034 | 0.1474437   | 0.02317353  | 0.05428459  | 0.2363793   | 0.04787427  |
| 0.3455169   | 0.02067487  | 0.2108136   | 0.3129742   | 0.1025594   | 0.03027505  |
| 0.01648648  | 0.039323017 | 0.1369511   | 0.5015014   | 0.3402146   | 0.1418125   |
| 0.3215059   | 0.4788862   | 0.03983943  | 0.02877941  | 0.03327499  | 0.01979693  |
| 0.05873906  | 0.06829034  | 0.06124802  | 0.09952254  | 0.05110548  | 0.1612325   |
| 0.07162328  | 0.1560647   | 0.009797695 | 0.06396453  | 0.2607058   | 0.06934395  |
| 0.09230192  | 0.01606491  | 0.1388698   | 0.2139497   | 0.03595351  | 0.8389317   |
| 0.4892209   | 0.03705046  | 0.01634477  | 0.007671034 | 0.007060495 | 0.08453722  |
| 0.1588248   | 6.71632     | 0.1885081   | 0.01578348  | 0.2908885   | 0.5964356   |
| 0.006065435 | 0.06955566  | 0.1782583   | 0.2081850   | 0.02931961  | 0.1908107   |
| 0.1026474   | 0.023317015 | 0.4111428   | 0.1270080   | 0.1144218   | 0.07483769  |
| 0.4374      |             |             |             |             |             |
| 0.209600099 | 0.296000566 | 0.2160366   | 0.057103461 | 0.03608405  | 0.02104798  |
| 0.05423007  | 0.08364318  | 0.4205724   | 0.6652372   | 0.7235168   | 0.6201924   |
| 0.03997799  | 0.9306886   | 0.01413322  | 0.132433259 | 0.1372024   | 0.1009115   |
| 0.04268424  | 0.3716187   | 0.1643250   | 0.1395443   | 0.01793173  | 0.01607872  |
| 1.1462480   | 0.1355427   |             |             |             |             |
| AL133243.3  | 0.2760198   | 0.07092494  | 0.1824670   | 0.12642008  | 0.176973102 |
| 0.344186    |             |             |             |             |             |
| 0.2337010   | 0.2706651   | 0.08711099  | 0.2055478   | 0.1592722   | 0.268726726 |
| 0.3003807   | 0.360365705 | 0.117608374 | 0.4613668   | 0.1859209   | 0.284189    |
| 0.2353492   | 0.6066281   | 0.491787651 | 0.1623710   | 0.4447008   | 0.09121217  |
| 0.3948666   | 0.2232536   | 0.3916039   | 0.1742036   | 0.3641538   | 0.246170221 |
| 0.2675425   | 0.212943272 | 0.1966452   | 0.2011643   | 0.2160762   | 0.316520551 |
| 0.2281009   | 0.3061165   | 0.2797613   | 0.2720349   | 0.1469243   | 0.27185     |



|             |             |             |             |             |             |
|-------------|-------------|-------------|-------------|-------------|-------------|
| 0.1999693   | 0.5745769   | 0.3645712   | 0.3121912   | 0.04331322  | 0.1643145   |
| 0.2370171   | 0.3982342   | 0.1724233   | 0.1378541   | 0.2023250   | 0.228927701 |
| 0.4510378   | 0.2547092   | 0.4124776   | 0.2338267   | 0.5716078   | 0.2717801   |
| 0.4563886   | 0.2951552   | 0.1768131   | 0.2217224   | 0.1252540   | 0.648156206 |
| 0.1156229   | 0.4234578   | 0.1807545   | 0.222258454 | 0.3106920   | 0.08709339  |
| 0.2544268   | 0.2731372   | 0.2423348   | 0.2036636   | 0.4128992   | 0.7420597   |
| 0.2635365   | 0.1408388   | 0.2785173   | 0.3660684   | 0.2115062   | 0.2218511   |
| 0.076583425 | 0.1122529   | 0.2987219   | 0.3219385   | 0.3424608   | 0.5403781   |
| 0.1410172   | 0.2626427   | 0.1119206   | 0.9217727   | 0.1822240   | 0.493747433 |
| 0.3035075   | 0.1569771   | 0.3290382   | 0.5548463   | 0.2584479   | 0.7368713   |
| 0.2606616   | 0.1650029   | 0.2243507   | 0.2386111   | 0.331096145 | 5.859509    |
| 0.158829511 | 0.5957780   | 0.2566049   | 0.3212058   | 0.3643398   | 0.3503477   |
| 0.8786463   | 0.1472987   | 0.1366371   | 0.6842270   | 0.4038569   | 0.3453428   |
| 0.1159094   | 0.2471897   | 0.1982224   | 0.1640671   | 0.8438239   | 0.2271422   |
| 0.04151697  | 0.6119490   | 0.20508941  | 0.2564929   | 0.2009335   | 0.3150829   |
| 0.1426768   | 0.190444775 | 0.4291588   | 0.2233467   | 0.3398570   | 0.2672468   |
| 0.2743473   | 0.4145017   | 0.1857882   | 0.3853524   | 0.4912078   | 0.4133608   |
| 0.2753590   | 0.2832625   | 7.10022     | 0.2086668   | 0.2641688   | 0.2594166   |
| 0.2175399   | 0.1042088   | 0.3524367   | 0.308012752 | 0.6375450   | 0.9311023   |
| 0.300284694 | 0.2388750   | 0.3552912   | 0.2703821   | 0.1700118   | 0.4709386   |
| 0.2857058   | 0.256256339 | 0.5437580   | 0.4336483   | 0.5613766   | 0.4845563   |
| 0.3281767   | 0.3149782   | 0.2027834   | 0.08998288  | 0.2462933   | 0.299722375 |
| 0.5818428   | 0.1785971   | 0.5034261   | 0.2539530   | 0.8090853   | 0.5808472   |
| 0.3459399   | 0.2690296   | 0.1441933   | 0.4736327   | 0.2229693   | 0.1938162   |
| 0.2086759   | 0.2678924   | 0.2659303   | 0.3517778   | 0.2707637   | 0.8133944   |
| 0.198603237 | 0.3827617   | 0.1951251   | 0.3701774   | 0.2624275   | 0.2286665   |
| 0.3048462   | 0.416248304 | 0.3407301   | 0.2075013   | 0.1972252   | 0.07393634  |
| 0.3591515   | 0.2687156   | 0.3521677   | 0.2556529   | 0.1650008   | 0.2086803   |
| 0.2076818   | 0.2469464   | 0.3994709   | 0.2375522   | 0.5810333   | 0.1734974   |
| 0.2444944   | 0.5406365   | 0.32518618  | 0.306665149 | 0.4007557   | 0.260130394 |
| 0.213193423 | 0.2592339   | 0.110065892 | 0.4151948   | 0.3209285   | 0.4611649   |
| 0.500659843 | 0.5888963   | 0.6356763   | 0.2788560   | 0.559970532 | 0.2348741   |
| 0.4868440   | 0.7603114   | 0.3906487   | 0.4765330   | 0.2509714   | 0.3666156   |
| 0.1781786   | 0.2540122   | 0.2968983   | 0.215768993 | 0.3485081   | 0.186027689 |
| 0.4727463   | 0.3452614   | 0.3059263   | 0.2338393   | 0.6282459   | 0.2799755   |
| 0.4497293   | 0.1607525   | 0.5532303   | 0.380071652 | 0.1964064   | 0.7294576   |
| 0.1764088   | 0.3008177   | 0.1468404   | 0.2422029   | 0.3920627   | 0.5916589   |
| 0.2728939   | 0.3580596   | 0.1031733   | 0.2106938   | 0.1350040   | 0.2830687   |
| 0.400121452 | 0.1724084   | 0.3093487   | 0.5445273   | 0.1523540   | 0.2175647   |
| 0.2590122   | 0.4615909   | 0.7035663   | 0.8638106   | 0.1838040   | 0.480865484 |
| 0.234134309 | 0.2885991   | 0.5112317   | 0.2709934   | 0.2913488   | 0.1579547   |
| 0.2035072   | 0.4246420   | 0.07889605  | 1.6674160   | 0.31232     | 0.6907366   |
| 0.3282394   | 0.5353071   | 0.6876434   | 0.2463646   | 0.1802581   | 0.2105118   |
| 0.2142484   | 0.5049119   | 0.4133706   | 0.1637998   | 0.1691686   | 0.2259092   |
| 0.164303    |             |             |             |             |             |

|             |            |             |             |             |             |             |
|-------------|------------|-------------|-------------|-------------|-------------|-------------|
| 1.320887    | 0.3322871  | 0.1896499   | 0.4303053   | 0.610944    | 0.21319552  | 0.1955536   |
| 0.2983489   | 0.299207   | 0.3041442   | 0.1710478   | 0.292543321 | 0.2929567   |             |
| 0.4023344   | 0.4551811  | 0.2484749   | 0.08743596  | 0.2274802   | 0.305684873 |             |
| 0.1287345   | 1.238859   | 0.2031608   | 0.3418652   | 0.235452567 | 0.7657919   |             |
| 0.0933169   | 0.1613019  | 0.190849966 | 0.481003483 | 0.5610739   | 0.5472015   |             |
| 0.3678305   | 0.3910249  | 0.3707364   | 0.1058174   | 0.1712238   | 0.1826349   |             |
| 0.3866808   | 0.4550197  | 0.3692568   | 0.6268275   | 0.171713127 | 0.1659795   |             |
| 7.862401    | 0.3367266  | 0.2257891   | 0.2531605   | 0.257219    | 0.6229629   | 0.06500277  |
| 0.2147335   | 0.2951152  | 0.5487766   | 0.1863786   | 0.2075072   | 0.1851188   |             |
| 0.6126651   | 0.1778497  | 0.2956528   | 0.3061153   | 0.3688269   | 0.722369    |             |
| 0.5455471   | 0.4156562  | 0.05211955  | 0.1669114   | 0.5410617   | 0.1551136   |             |
| 0.1714361   | 0.1869366  | 0.2282027   | 0.2566316   | 0.1661274   | 0.3551875   |             |
| 0.7760982   | 0.1847811  | 0.1582634   | 0.311847    | 0.1838573   | 0.1711174   |             |
| 0.3285085   | 0.2806546  | 0.1575469   | 0.2029237   | 0.2362061   | 0.9926826   |             |
| 0.355948    | 0.3878781  | 0.5796127   | 0.631981137 | 0.1837913   | 0.2049052   |             |
| 0.2943337   | 0.2218552  | 0.2090869   | 0.239781288 | 0.408927003 | 0.2252087   |             |
| 0.249355584 | 0.2626157  | 0.6893319   | 0.2449741   | 0.3177309   | 0.305334    |             |
| 0.3322928   | 0.3888     | 0.1918905   | 0.2040032   | 0.410756    | 0.3000675   | 0.152493089 |
| 0.218748    | 0.3570813  | 0.3374314   | 0.3443522   | 0.2456931   | 0.3151824   |             |
| 0.253135    | 0.2396874  | 0.1678042   | 0.8364297   |             |             |             |
| AL606534.1  | 0.06400499 | 0           | 0.02468169  | 0           | 0.022530395 | 0.0993213   |
| 0.1046464   |            |             |             |             |             |             |
| 0.06694754  | 0          | 0           | 0.1622152   | 0.109049228 | 0.1083506   | 0.03058537  |
| 0.039159339 | 0          | 0.1341274   | 0           | 0           | 0.3101348   | 0.181167466 |
| 0.1479637   |            |             |             |             |             |             |
| 0.0671477   | 0          | 0.08690808  | 0.05522057  | 0.02260093  | 0.06653343  | 0.1074716   |
| 0.029598757 | 0.05386352 | 0.112406268 | 0           | 0.02808857  | 0.2158367   | 0.092886019 |
| 0.08711839  | 0.08548609 | 0.3302605   | 0.07359444  | 0.03533147  | 0.05603386  |             |
| 0.1527482   | 0.1535231  | 0.04152783  | 0.02875168  | 0.05356645  | 0.1016057   |             |
| 0.06548526  | 0          | 0.08956073  | 0.01808198  | 0.03807695  | 0.056624028 | 0.06732175  |
| 0.02826965  | 0.0956476  | 0.02200274  | 0.3894608   | 0.5882041   | 0.2469365   |             |
| 0.1246427   | 0.06957643 | 0           | 0.1016561   | 0.11689849  | 0           | 0.1205888   |
| 0.09388818  | 0          | 0.1968058   | 0.1507946   | 0.1048852   | 0.10748024  | 0.1979158   |
| 0           | 0.06499079 | 0.1095009   | 0.2101337   | 0           | 0.1954979   | 0.1584538   |
| 0.06781561  | 0.1630679  | 0           | 0.04049083  | 0.06256581  | 0.1875893   | 0           |
| 0.203395    | 0.132695   | 0.046402321 | 0           | 0           | 0.03033701  | 0.208507386 |
| 0.2542725   |            |             |             |             |             | 0           |
| 0.08901574  | 0.1264036  | 0.06580585  | 0.3721165   | 0.03890626  | 0.03105304  |             |
| 0.1213886   | 0.2233158  | 0.305427473 | 0.5636236   | 0           | 0.1406642   | 0.07660152  |
| 0           | 0.1314213  | 0.06407706  | 0.1240189   | 0.1006716   | 0           | 0           |
| 0.2420455   |            |             |             |             |             | 0           |
| 0           | 0.03242328 | 0.1980027   | 0.1014528   | 0.2125804   | 0           | 0           |
| 0.03485315  |            |             |             |             |             |             |
| 0.221933929 | 0          | 0.09939964  | 0.09570847  | 0.0882258   | 0.109912796 | 0.1407293   |
| 0.2230991   | 0.1634535  | 0.08070598  | 0.03209515  | 0.09698286  | 0.04467721  |             |
| 0.1163728   | 0.1431102  | 0.2159433   | 0.06442702  | 0.08604284  | 2.731868    |             |
| 0.03114554  | 0.03176286 | 0.1796628   | 0.04379665  | 0           | 0.0346712   | 0.152370573 |
| 0.09682922  | 0.03358587 | 0.027078987 | 0.1216444   | 0.1230311   | 0.03250992  |             |
| 0.1226502   | 0.1456051  | 0.1952663   | 0.175138945 | 0.07355227  | 0.0360973   |             |

|             |             |             |             |             |             |             |            |
|-------------|-------------|-------------|-------------|-------------|-------------|-------------|------------|
| 0.03738362  | 0.1310885   | 0.09470151  | 0.1450418   | 0.1067539   | 0.02996105  |             |            |
| 0.0969171   | 0.353824737 | 0.1707474   | 0.03681253  | 0.1894865   | 0.0578549   |             |            |
| 0.1273509   | 0           | 0.2542774   | 0.07763352  | 0.0814102   | 0.03203334  | 0.05515025  |            |
| 0.0962717   | 0.0311469   | 0.0341053   | 0.1023189   | 0.1234606   | 0           | 0.8524048   |            |
| 0           | 0.2070994   | 0.3541892   | 0.07283292  | 0.1352292   | 0.06598599  | 0.1244845   |            |
| 0.053783384 | 0           | 0.03326577  | 0.06402713  | 0           | 0           | 0.0553878   | 0          |
| 0.06695729  | 0           | 0.1284224   | 0.03054043  | 0.1304998   | 0.1468931   | 0.04572764  |            |
| 0.2503297   | 0           | 0.1625112   | 0.201082603 | 0.066370469 | 0.4219499   | 0.059262225 |            |
| 0.063642357 | 0           | 0           | 0           | 0.08419083  | 0.06883332  | 0.03736416  | 0.3024303  |
| 0.1930908   | 0.2217006   | 0.12119247  | 0.1524989   | 0.05268297  | 0.2600398   |             |            |
| 0.7721971   | 0.1300719   | 0.1250114   | 0           | 0.1379919   | 0.04820322  | 0.07018083  |            |
| 0.06320329  | 0.031132087 | 0.2080728   | 0.029823203 | 0.1278936   | 0.1211736   |             |            |
| 0.04341677  | 0           | 0.1117554   | 0.1317264   | 0.5450667   | 0           | 0.1349112   |            |
| 0.109676776 | 0.1545729   | 0.1127671   | 0.1214803   | 0.2297821   | 0.02542412  |             |            |
| 0.02688161  | 0.06926756  | 0.2955016   | 0.1450632   | 0           | 0.06870595  | 0           | 0          |
| 0.03063179  | 0.051699636 | 0.02072986  | 0.1825943   | 0           | 0           | 0.1086618   | 0          |
| 0.09081865  | 0.1162369   | 0.06860606  | 0.4150962   | 0.361989704 | 0           | 0.1748894   |            |
| 0.1106441   | 0.1005431   | 0.1230353   | 0.1367423   | 0           | 0.03196654  | 0           |            |
| 0.3071259   | 0           | 0.03784651  | 0.06458156  | 0.2208050   | 0.4158885   | 0.1301196   |            |
| 0.2332742   | 0.1606402   | 0.1139008   | 0.167099823 | 0.2362731   | 0.031391    |             |            |
| 0.1459732   | 0           | 0           | 0.03092132  | 0.08662878  | 0.0927945   | 0.1324041   |            |
| 0.07602405  | 0.1492857   | 0.023070581 | 0.06511229  | 0.09933941  | 0.2100205   |             |            |
| 0.02742702  | 0.06169881  | 0.081695653 | 0.1152793   | 0.1543116   | 0.02373814  |             |            |
| 0.03841183  | 0.0222629   | 0.04475704  | 0.168914837 | 0.2918830   | 0.2855737   |             |            |
| 0.1134694   | 0.1268377   | 0.301116507 | 0           | 0.04488056  | 0           | 0.157352353 |            |
| 0.15537598  | 0.1410169   | 0.08238533  | 0.03121893  | 0.1627465   | 0.06686433  | 0           |            |
| 0.03368852  | 0.2258687   | 0.07845748  | 0           | 0.2367910   | 0.051259687 | 0.1306268   |            |
| 1.2113310   | 0.3182021   | 0.05767437  | 0.1427410   | 0.2696514   | 0.04689441  |             |            |
| 0.1858961   | 0.1548382   | 0.02610326  | 0.0556376   | 0.3635577   | 0.1144703   |             |            |
| 0.1537356   | 0.05498771  | 0.2414608   | 0.0401524   | 0.2554366   | 0.1737109   |             |            |
| 0.1499312   | 0.07822523  | 0           | 0.03141222  | 0.1018262   | 0.05164723  | 0.1171684   |            |
| 0           | 0           | 0.09659457  | 0.1065315   | 0.4124839   | 0.1380561   | 0.02666101  |            |
| 0.02283493  | 0.08708641  | 0.2932012   | 0.2160336   | 0.05266514  | 0.04049407  |             |            |
| 0.02964984  | 0.05666849  | 0.02323694  | 0.09692158  | 0           | 0.2176406   | 0.0557527   |            |
| 0.045592491 | 0.08374171  | 0           | 0.3728875   | 0           | 0.04525195  | 0.106451339 |            |
| 0.168576467 | 0.03249409  | 0.186093653 | 0.03919793  | 0.1371859   | 0           | 0.3159491   |            |
| 0.1048927   | 0.3126825   | 0.05259164  | 0.04153019  | 0.01447597  | 0.02614662  |             |            |
| 0.08290541  | 0.203098754 | 0           | 0.09865769  | 0.06955153  | 0           | 0.2036470   | 0.07180404 |
| 0.1095703   | 0.1571961   | 0.1037637   | 0.07099041  |             |             |             |            |
| WWTR1-IT1   | 0.1313214   | 0           | 0.1519210   | 0.631539778 | 0.173349158 | 0.1528359   |            |
| 0.2147069   | 0.5150952   | 0.1740675   | 0.1711379   | 0           | 0           | 0.03334603  |            |
| 0.188259394 | 0           | 0.1589509   | 0.0515989   | 0.2523884   | 0.1458235   | 0           | 0          |
| 0.05692173  | 0.1033271   | 0.1072133   | 0.08915625  | 0           | 0.06955673  | 0.03412727  |            |
| 0.1102518   | 0           | 0.2486560   | 0.034594213 | 0.1155710   | 0.08644553  | 0           | 0          |
|             |             |             |             |             |             | 0.044686    |            |

0.06577311 0.5082057 0.1132473 0.1087363 0.08622505 0 0.09449667  
0 0.04424317 0.0412141 0 0.03358963 0.16076 0.04593876 0  
0.1757788 0.04356602 0.05179744 0.04350142 0.09812186 0.1354315  
0.1057594 0.1597288 0.1266622 0.04795015 0 0.05680148 0.05214289  
0.059961236 0.2200388 0 0 0.049346962 0 0 0.04034939 0.110260586  
0.1522767 0.2260921 0.0500040 0.05616678 0.04619347 0.3752370 0.05013879  
0 0.2087097 0.1394052 0 0.06230739 0.03209214 0.08247511 0 0  
0 0.071404016 0.07454754 0.1180712 0.04668267 0 0.1304251  
0.05503084 0 0.04862756 0.03375407 0.1636039 0.05986906 0  
0.03735862 0 0 2.6019160 0.088160357 0.1443029 0.1178746 0  
0.0674105 0 0.06361355 0.05163791 0.3212140 0.04138448 0.0561035  
0.2316132 0.04989303 0 0.06244631 0.05947623 0.05043128 0.04608905  
0.05363213 0.136605008 0 0.1147173 0 0.1357621 0.084567052 0  
0.05721758 0 0.08279372 0 0 0.1374988 0 0 0 0.09914047 0  
20.493550.91061 0.09775354 0.2764656 0.0336972 0.04957922 0 0  
0.07450053 0.05168203 0.041669217 0.09359339 0 0.3501844 0.2359181  
0.0560144 0.1001587 0.089834758 0.1131824 0 0 0.0336199  
0.1457269 0.08927627 0.1095154 0.09220827 0.1118522 0 0 0  
0.1093434 0.08902728 0 0.04205305 0.2173793 0.1194627 0.08351616  
0 0.1272980.1693065 0 0.1049626 0.07872427 0 0 0.1140594 0  
0.1062284 0 0.05603775 0.1664728 0.1015394 0.1915571 0.124143023  
0 0.2047578 0.03284171 0.07035311 0 0.0852309 0 0.2064049  
0.06868937 0 0 0.09399138 0.05020334 0.1130198 0.07036581  
0.1650891 0 0 0.154713222 0.068087369 0.2164325 0.045596435  
0.097933029 0.09333478 0.056393986 0.04609184 0.1943296 0.03530696  
0.057496069 0.06648294 0.1857054 0.03790595 0 0.07822193 0  
0.2223055 0.2546269 0.2001550.1923678 0.09286993 0.03539038  
0.2225257 0.1079944 0 0.143718415 0 0.091784048 0 0.03107704  
0.1336197 0.05990562 0 0.2432410 0.1396608 0 0.042192729 0 0  
0.1068196 0.07857539 0.03912271 0 0.05329455 0.05052429 0.2232237  
0.1663916 0 0 0.4087402 0.04713628 0.079555538 0.06379834 0  
0.1265220 0 0 0.09316798 0 0.1055712 0 0.092838453 0.057759667  
0.03844575 0.08512972 0.2062881 0 0.05260487 0.1355511 0.09838038  
0.04777338 0.6616487 0 0 0.03312609 0.03397753 0.09142433  
0.05005709 0.3076826 0.03531337 0.1314532 0.128566826 0.1363417 0  
0.2246239 0 0.05787405 0.3330727 0.2666092 0.07139621 0.04074876  
0.1169860.03281732 0.035501072 0.2504874 0 0 0.1266143 0  
0.031428372 0.02956534 0.06784431 0.07305661 0 0.1370328 0  
0.0433211 0.04083185 0.09765369 0.0873035 0.06505942 0 0.07184157  
0.2071870 0.060533555 0 0.02411081 0.09508107 0.1441193 0.1001739  
0 0.08810299 0 0.04344592 0 0 0 0 0.078878543 0.1005044  
5.14819 0.1150181 0 0.04437473 0.08786012 0.04610447 0.03608062 0  
0.05956636 0 0 0 0.08807361 0.0591422 0.08461524 0 0.06178662  
0 0.1603841 0.05767865 0.0401244 0.1735778 0 0.05223013 0

|             |             |             |             |             |             |             |             |
|-------------|-------------|-------------|-------------|-------------|-------------|-------------|-------------|
| 0.1802990   | 0.1600002   | 0.11148     | 0           | 0.2308114   | 0           | 0           | 0.03513845  |
| 0.3350220   | 0.04749044  | 0           | 0           | 0           | 0.1308024   | 0.1430283   | 0           |
| 0.04784371  | 0.0857924   | 0           | 0.03221549  | 0.0454941   | 0.1434501   | 0           |             |
| 0.03481691  | 0.081903802 | 0.259405917 | 0.05000199  | 0.057272282 | 0.06031788  | 0           |             |
| 4.07928     | 0.05719804  | 0.06456364  | 0.04811566  | 0           | 0.06390677  | 0           | 0           |
| 0.04252502  | 0.117198339 | 0           | 0.05060491  | 0           | 0.2867056   | 0.06963836  |             |
| 0.1104922   | 0.1011642   | 0.1451363   | 0           | 0.07282683  |             |             |             |
| AC093423.2  | 0.03388212  | 0.1392995   | 0.1959850   | 0.07241913  | 0.107341607 | 0.1051548   |             |
| 0.3323780   | 0.2126389   | 0.05988133  | 0.0883103   | 0.1932105   | 0.346362307 |             |             |
| 0.3441433   | 0.048572647 | 0           | 0.2734052   | 0.1065039   | 0.1953555   | 0.2633667   |             |
| 0           | 0.215784133 | 0           | 0.07109154  | 0.1475307   | 0           | 0.04384791  | 0.2512478   |
| 0.2113236   | 0           | 0.188023225 | 0.08554069  | 0.071404989 | 0.07951569  | 0.08921495  |             |
| 0           | 0           | 0.1844704   | 0.06788026  | 0.08741448  | 0.7012523   | 0.4488794   |             |
| 0.08898741  | 0.08085986  | 0.04876201  | 0.1319007   | 0           | 0           | 0           | 0.1733287   |
| 0.0829551   | 0.04741049  | 0           | 0           | 0.044962329 | 0.05345686  | 0.08979011  |             |
| 0.05063268  | 0.03494257  | 0.07276506  | 0.1098973   | 0           | 0.1484589   | 0.05524719  |             |
| 0.0586212   | 0.05381337  | 0.123764381 | 0.2270881   | 0.03830144  | 0.1988052   |             |             |
| 0.050927871 | 0.1562737   | 0           | 0.1665682   | 0.113792962 | 0.2828792   | 0           | 0           |
| 0.1906934   | 0           | 0.05174507  | 0           | 0           | 0.05754851  | 0.065805666 | 0           |
| 0.1276760   | 0.3230118   | 0           | 0.073691558 | 0.07693579  | 0.03046344  | 0.09635644  |             |
| 0.082782681 | 0.06730173  | 0           | 0           | 0           | 0.03483544  | 0.2110566   | 0.1235741   |
| 0.07711094  | 0.04433099  | 0.298492049 | 6.0418640   | 0.22746179  | 0           | 0.06082546  |             |
| 0.04014572  | 0           | 0.3052825   | 0.1969545   | 0.05329221  | 0           | 0.1411042   |             |
| 0.3843927   | 0.05790087  | 0           | 0           | 0           | 0.03222344  | 0.03069082  | 0.3122815   |
| 0.1426968   | 0.1660510   | 0.070490685 | 0.06653467  | 0.03946416  | 0.1899934   | 0           |             |
| 0.174552587 | 0.08939693  | 0.2952532   | 0.1730537   | 0.04272307  | 0           | 0           | 0           |
| 0.1232078   | 0.1623381   | 0           | 0.0511583   | 0.06832235  | 14.642380   | 0.05044261  |             |
| 0           | 0.03477675  | 0           | 0.1101227   | 0.060494953 | 0.1537746   | 0           | 0.172016632 |
| 0.0965918   | 0.09769288  | 0.2065161   | 0.1460857   | 0.2312356   | 0.2067350   |             |             |
| 0.05840421  | 0.1719784   | 0.1781069   | 0.03469697  | 0.1002637   | 0.1382046   |             |             |
| 0.03767465  | 0.2379058   | 0.5002209   | 0           | 0.1355820   | 0.1169240   | 0.09187941  |             |
| 0.06741536  | 0.1302009   | 0.1346060   | 0           | 0           | 0.04379207  | 0.06552392  |             |
| 0.1483932   | 0.05416265  | 0.04062316  | 0           | 0           | 0.2942836   | 0.047076787 | 0           |
| 0.8653663   | 0.05783301  | 0           | 0.2619810   | 0.07907759  | 0           | 0.0975928   | 0.2113175   |
| 0.06778769  | 0.07260698  | 0.197508669 | 0.2052433   | 0.1274132   | 0.585798    |             |             |
| 0.03544497  | 0.1344842   | 0           | 0           | 0.05181169  | 0.05832027  | 0           | 0           |
| 0.4645515   | 0.31933942  | 0.210805974 | 0.07445544  | 0           | 0.050535236 | 0.1444874   |             |
| 0           | 0.04756847  | 0.06685176  | 0.03643808  | 0.059338048 | 0.1372257   | 0.07666191  |             |
| 0.1564813   | 0.128310563 | 0           | 0.08366586  | 0.1376564   | 0.2627843   | 0           | 0           |
| 0.4792259   | 0           | 0           | 0           | 0.1003732   | 0.049440889 | 0.08261015  | 0.094724498 |
| 0.06770261  | 0.09621794  | 0.0344751   | 0.3709487   | 0.05915961  | 0.08367789  | 0           |             |
| 0.04804503  | 0           | 0.304811087 | 0.08182579  | 0           | 0.02756043  | 0.08109268  |             |
| 0.1615043   | 0.08538139  | 0           | 0.05214291  | 0.2303750   | 0.1144815   | 0.3273359   |             |
| 0.09988544  | 0.08436697  | 0.1459391   | 0           | 0.29629     | 0           | 0.4352510   | 0.3451316   |

|             |             |             |             |             |             |             |             |            |            |
|-------------|-------------|-------------|-------------|-------------|-------------|-------------|-------------|------------|------------|
| 0           | 0.04807638  | 0.1476768   | 0.1089533   | 0.2746728   | 0.287438049 | 0.178830273 |             |            |            |
| 0.3174193   | 0           | 0.1064484   | 0.1465443   | 0.2171606   | 0.2797874   | 0.1776813   |             |            |            |
| 0.04930388  | 0.2438734   | 0.09758783  | 0.06010407  | 0.1367494   | 0           | 0.5661196   |             |            |            |
| 0           | 0.05292328  | 0.03644469  | 0.04522149  | 0           | 0.1876128   | 0.09970414  |             |            |            |
| 0.09935147  | 0           | 0.05972814  | 0.04910617  | 0.8942390   | 0.04205421  | 0           |             |            |            |
| 0.06773735  | 0.183192031 | 0           | 0           | 0.05558896  | 0.08711375  | 0.09798392  |             |            |            |
| 0.064870461 | 0.03051251  | 0.07001782  | 0.0753971   | 0.1830056   | 0           | 0.1421574   |             |            |            |
| 0.402380653 | 0.2106998   | 0           | 0.1351506   | 0.4364341   | 0.183924358 | 0.2224294   |             |            |            |
| 0.4276491   | 0.3080034   | 0.437309915 | 0           | 0           | 0.1635452   | 0           | 0           | 0.05309364 |            |
| 0           | 0           | 0.04483778  | 0           | 0.1137407   | 0           | 0           | 0.081405545 | 0          | 5.31312    |
| 0.1780543   | 0           | 0.1373890   | 0.04533743  | 0           | 0.03723652  | 0           | 0           | 0.2487276  |            |
| 0.08835811  | 0.1698136   | 0           | 0.3051846   | 0.2619781   | 0.0383464   | 0.06376605  |             |            |            |
| 0.7099032   | 0.05517408  | 0.05952647  | 0.04140985  | 0.2388515   | 0           | 0.0539034   |             |            |            |
| 0.0410105   | 0           | 0.05841039  | 0.1651261   | 0.3068038   | 0           | 0           | 0           | 0.04234037 |            |
| 0.1450567   | 0.0691510   | 0.1330380   | 0.09802375  | 0           | 0           | 0.1412608   | 0.3599811   |            |            |
| 0.1107078   | 0.2565354   | 0.2276127   | 0           | 0           | 0.289621867 | 0.2659805   | 0           |            |            |
| 0.1973943   | 0.5809768   | 0.2874586   | 0.042263861 | 0           | 0.05160388  | 0.709285101 |             |            |            |
| 0           | 0.1089325   | 0.8419932   | 0.02951524  | 0.03331602  | 0           | 0.1252812   |             |            |            |
| 0.06595413  | 0.09195716  | 0.08304692  | 0           | 0           | 0.06265435  | 0           | 0           | 0.1479453  |            |
| 0.1078040   | 0.03801068  | 0.03480172  | 0.09985729  | 0.1098581   | 0.1127399   |             |             |            |            |
| AL133445.2  | 0.1404790   | 0.1155102   | 0.1950181   | 0.120103074 | 0.118680031 | 0.08719669  |             |            |            |
| 0.1837434   | 0.2644872   | 0.09930984  | 0.6590596   | 0.1602144   | 0.382948332 |             |             |            |            |
| 0.08561135  | 0.322220063 | 0.051568465 | 0.1360282   | 0.1324731   | 1.133952    |             |             |            |            |
| 0.06239698  | 0.05445505  | 0           | 0           | 0.02947534  | 0.3670071   | 0.0762988   |             |            |            |
| 0.1090790   | 0.02976289  | 0.05841139  | 0.04717604  | 0           | 0.1063983   | 0.029605294 |             |            |            |
| 0.03296808  | 0.0739790   | 0.04737214  | 0.091740366 | 0.2676921   | 0.05628781  |             |             |            |            |
| 0.4349161   | 0.2907469   | 0           | 0.1475806   | 0.06705078  | 0.04043453  | 0.1093750   |             |            |            |
| 0           | 0           | 0.08623676  | 0.06878819  | 0.03931382  | 0           | 0           | 0           | 0          | 0.03722797 |
| 0.08397146  | 0.2028260   | 0.03016919  | 0.09112929  | 0.1625939   | 0.1641405   |             |             |            |            |
| 0.04581219  | 0.14583     | 0           | 0.153942224 | 0.09415325  | 0.06352079  | 0.08242682  |             |            |            |
| 0.084461024 | 0.0431952   | 0.09928977  | 0           | 0.141539443 | 0.1824430   | 0.2902302   |             |            |            |
| 0.1283784   | 0           | 0.03953179  | 0.05352053  | 0.0858163   | 0           | 0.1339584   |             |            |            |
| 0.07158074  | 0.054567507 | 0.1599657   | 0.05492811  | 0           | 0.04337981  | 0.1339243   |             |            |            |
| 0.0349489   | 0.122213325 | 0.09569527  | 0.02526096  | 0.07990088  | 0           | 0.1674242   |             |            |            |
| 0.04709471  | 0           | 0.1248446   | 0.05777263  | 0.3150230   | 0.1024704   | 0.04089338  | 0           |            |            |
| 0.1102807   | 0.216576655 | 7.9789640   | 0.226339587 | 0.1852390   | 0.1331588   | 0           |             |            |            |
| 0.02812744  | 0.1088794   | 0.1325732   | 0           | 0.07800447  | 0.3187469   | 0           | 0           |            |            |
| 0.04269783  | 0           | 0.02672039  | 0.05089901  | 0           | 0.03944243  | 0.0917954   |             |            |            |
| 0.175357283 | 0.08275802  | 0.09817365  | 0           | 0           | 0.144742847 | 0.1111949   |             |            |            |
| 0.04896609  | 0.07174997  | 0.4959768   | 0.29586     | 0           | 0.02941744  | 0.2554165   |             |            |            |
| 0.08076859  | 0           | 0.08484318  | 0.1133088   | 16.959950   | 0.04182813  | 0.1182979   |             |            |            |
| 0           | 0.04242928  | 0.09131618  | 0           | 0.06375662  | 0.04422883  | 0.071319989 |             |            |            |
| 0.2002401   | 0.08100908  | 0.04281192  | 0.04037916  | 0           | 0           | 0.038439731 |             |            |            |
| 0.04843006  | 0.09507221  | 0.04923004  | 0.1150860   | 0.3325634   | 0.1146023   |             |             |            |            |

|             |             |             |             |             |             |            |            |   |
|-------------|-------------|-------------|-------------|-------------|-------------|------------|------------|---|
| 0.2030642   | 0.1183660   | 0.1595362   | 0.3106317   | 0.11        | 0.2248552   | 0          | 0.1247663  | 0 |
| 0.1397558   | 0.07197695  | 0.2232366   | 0.1022347   | 0.07147208  | 0.126553    |            |            |   |
| 0.1452534   | 0.1086678   | 0.08203396  | 0           | 0.1347425   | 0.1083892   | 0.1815770  |            |   |
| 0           | 0.09090892  | 0.1435162   | 0.0479564   | 0.07123269  | 0.04344808  | 0.06557288 |            |   |
| 0.035413348 | 0.1618522   | 0           | 0.05621104  | 0.06020731  | 0.737003413 | 0.09725271 |            |   |
| 0.05282691  | 0.04415969  | 0           | 0           | 0.02818632  | 0           | 0.04296339 | 0.1450814  |   |
| 0.3613091   | 0.09418746  | 0.09089118  | 0           | 0.066200819 | 0.087402477 | 0.7408811  |            |   |
| 0.078041716 | 0.251429579 | 0.03993737  | 0           | 0           | 0.2771747   | 0.09064577 | 0          | 0 |
| 0.1907092   | 0           | 0.159596914 | 0.06694135  | 0.1387551   | 0.4565910   | 0.09684735 |            |   |
| 0.1712901   | 0.3292520   | 0.07947693  | 0.03028664  | 0.3173912   | 0           | 0.1109755  |            |   |
| 0.163989893 | 0.06850215  | 0.353464376 | 0.2526322   | 0.02659534  | 0.08576253  | 0          |            |   |
| 0           | 0.03469377  | 0.1025417   | 0.31872     | 0.04441574  | 0.252756062 | 0.1017776  | 0          |   |
| 0.04570743  | 0.1344877   | 0.06696145  | 0.07080013  | 0.04560881  | 0.1729522   |            |            |   |
| 0.1910321   | 0.1423959   | 0.1809561   | 0.0414136   | 0.8395074   | 0.1210159   | 0          |            |   |
| 0.02729891  | 0.2404563   | 0.07218393  | 0.02631657  | 0.1430954   | 0.04473995  | 0          |            |   |
| 0.06122841  | 0.04517325  | 0           | 0.27807495  | 0.098859999 | 0.06580278  | 0          |            |   |
| 0.3089428   | 0.2430356   | 0.1350558   | 0.1160029   | 0.1683854   | 0           | 0.4044505  |            |   |
| 0.08092197  | 0.2491981   | 0.2267911   | 0.2326203   | 0.1564796   | 0.04283823  |            |            |   |
| 0.0877703   | 0.09066222  | 0.1499946   | 0.073350587 | 0.03889316  | 0.08267687  |            |            |   |
| 0.02746147  | 0.09183742  | 0.2476394   | 0.3257593   | 0.7415227   | 0           | 0          |            |   |
| 0.1001152   | 0.0561693   | 0           | 0.1286184   | 0.06540944  | 0           | 0.07223664 |            |   |
| 0.4875025   | 0.134480036 | 0.1265082   | 0.05806031  | 0           | 0.1011682   | 0.05863548 |            |   |
| 0.11788     | 0.556104824 | 0.2446037   | 0.08357081  | 0.03735662  | 0.05567704  |            |            |   |
| 0.030502825 | 0           | 0.1773080   | 0.1532419   | 0.207215433 | 0.081845108 | 0.1444361  |            |   |
| 0.1627384   | 0.1644474   | 0           | 0           | 0.2261923   | 0.1330920   | 0.07436096 | 0.1033197  |   |
| 0.0943163   | 0.07795681  | 0.03537659  | 0.067503269 | 0.3440417   | 7.216325    |            |            |   |
| 0.04921553  | 0.1197247   | 0.07595068  | 0.03759479  | 0.1972781   | 0.1543867   |            |            |   |
| 0.06120109  | 0           | 0           | 0.03663425  | 0.1126505   | 0.0753723   | 0          | 0.09655021 |   |
| 0.03179768  | 0.05287621  | 0           | 0.1143789   | 0.2468033   | 0           | 0.1485457  |            |   |
| 0.08273276  | 0.04469789  | 0.1700341   | 0.05143255  | 0.09687037  | 0           | 0.03180106 |            |   |
| 0           | 0.09876274  | 0.1212029   | 0.1053287   | 0.09021314  | 0.2867076   | 0.110318   |            |   |
| 0.04064173  | 0.1040311   | 0.1599785   | 0.03904552  | 0.2238782   | 0.09180135  |            |            |   |
| 0.04254496  | 0           | 0           | 0           | 0.1378481   | 0.07786657  | 0.08184186 | 0.1806595  |   |
| 0.08938763  | 0           | 0.480992059 | 0.08558215  | 0.049012901 | 0.2064771   | 0          | 0          |   |
| 0.2202722   | 0.05525276  | 0           | 0.03462865  | 0.05469061  | 0.0762529   | 0.3098895  |            |   |
| 0           | 0.03343229  | 0.1558631   | 0.04330705  | 0.1831832   | 0.1226795   | 0.1489891  |            |   |
| 0.3782315   | 0.1442918   | 0.04140193  | 0           | 0.09348643  |             |            |            |   |
| AL157838.1  | 0.1183572   | 0.01216504  | 0.1711540   | 0.27827239  | 0.062494381 | 0.2112132  |            |   |
| 0.1064309   | 0.2599769   | 0.06275334  | 0.2467888   | 0.2699696   | 0.221817694 |            |            |   |
| 0.2825083   | 0.186641657 | 0.173791087 | 0.3629231   | 0.4092440   | 0.1137362   |            |            |   |
| 0.04599969  | 0.7684865   | 1.507556612 | 0.8208378   | 0.6270518   | 0.3027711   |            |            |   |
| 1.0606810   | 0.7964827   | 0.4701752   | 0.7997131   | 3.3884350   | 0.049260281 | 0.2689301  |            |   |
| 1.820855746 | 0.1458264   | 0.7012038   | 1.0676530   | 0.244763199 | 1.0229740   | 0.2015517  |            |   |
| 0.4427673   | 0.1428944   | 0.05880105  | 0.2409097   | 0.9744874   | 1.481921    |            |            |   |

|             |             |             |             |             |             |            |
|-------------|-------------|-------------|-------------|-------------|-------------|------------|
| 0.2764538   | 1.3717150   | 0.02971632  | 0.2254656   | 0.3087910   | 0.3187571   | 0.1656146  |
| 0.6219278   | 0.4119068   | 0.722488192 | 0.1120415   | 1.1840490   | 0.9108822   |            |
| 0.5187617   | 1.3408170   | 0.8541641   | 1.1073320   | 0.6482469   | 1.1096910   | 0.4095518  |
| 0.4699529   | 0.421526049 | 0.4858752   | 1.8463680   | 0.2517444   | 0.2579572   |            |
| 0.5276997   | 0.1882220   | 0.2763821   | 0.387564637 | 0.4995673   | 0.2649037   |            |
| 0.5137701   | 0.5264682   | 1.4987950   | 0.05636554  | 0.9399320   | 0.2344086   | 0.1504845  |
| 0.4523148   | 0.011493636 | 0.4155570   | 0.1561895   | 0.2155660   | 0.05482292  | 0.06205906 |
| 0.4784871   | 0.231677777 | 0.2351584   | 0.2819999   | 1.1528310   | 0.549436129 |            |
| 1.0344350   | 0.05951777  | 1.9012080   | 0.2980236   | 0.2555434   | 0.5308301   | 0.3021689  |
| 2.3686940   | 0.2020233   | 0.3174574   | 0.221572485 | 17.216590   | 0.150968444 | 0.1040458  |
| 1.2748550   | 0.4908303   | 0.9113350   | 0.5095091   | 0.8829368   | 0.2792410   | 0.1158014  |
| 1.0515330   | 0.6340823   | 0.1516947   | 0.2504977   | 1.4389611   | 0.3089650   | 0.7710572  |
| 0.2733838   | 0.2181727   | 0.008307819 | 0.4640401   | 0.344733821 | 0.168504    |            |
| 0.5031759   | 0.23229     | 0.3344494   | 0.015243701 | 0.7807046   | 0.7013384   |            |
| 0.5289481   | 0.1865506   | 0.5964669   | 0.2959101   | 0.1982797   | 2.119671    |            |
| 0.5160431   | 0.9583671   | 0.5450547   | 0.6503594   | 5.1690080   | 0.2246164   |            |
| 0.2378787   | 0.1370450   | 0.4069658   | 0.05362165  | 0.1442555   | 1.024908298 |            |
| 1.0206160   | 0.6986988   | 0.120177887 | 0.3795919   | 0.2730090   | 0.4959646   | 0.6804098  |
| 0.3130045   | 0.7402219   | 0.250995155 | 0.3264286   | 0.6207813   | 0.207388    |            |
| 0.9756892   | 0.2714373   | 0.5551935   | 0.6382856   | 0.04986323  | 0.3427542   |            |
| 0.403477734 | 0.7577854   | 0.1429538   | 0.7226919   | 0.1524530   | 0.8713341   |            |
| 0.1212849   | 1.6927440   | 0.1722707   | 0.3010854   | 0.2043630   | 0.1376772   | 0.637073   |
| 0.09503414  | 0.7095047   | 0.6243822   | 0.1826414   | 0.08605313  | 1.716748    |            |
| 0.1480041   | 1.8573830   | 0.06045804  | 0.2626293   | 0.7877020   | 0.3111522   | 0.6905856  |
| 0.111887496 | 0.1107963   | 0.1568623   | 0.4143936   | 0.5199438   | 0.103490754 |            |
| 0.5018699   | 0.4784614   | 0.4836739   | 0.6314645   | 0.4854403   | 2.303528    |            |
| 0.3134361   | 0.6741835   | 0.7435951   | 0.1902577   | 0.7836344   | 0.9572272   |            |
| 0.3696318   | 0.278879549 | 0.190233715 | 0.8973041   | 0.254789671 | 0.105917976 |            |
| 0.1430051   | 0.142314799 | 1.1050070   | 0.6889044   | 1.02465     | 0.54929198  | 1.977349   |
| 0.95737     | 0.4646281   | 0.437009777 | 0.4934985   | 0.7014289   | 0.2564598   |            |
| 0.3569843   | 0.26458     | 0.7368526   | 0.1674034   | 0.6124148   | 0.02674104  |            |
| 0.4542213   | 0.53178     | 0.544027623 | 0.3751465   | 0.12408455  | 0.4138735   |            |
| 0.4481454   | 0.4215001   | 0.2267650   | 0.8679580   | 0.3361497   | 0.4643679   | 0.05034935 |
| 0.7203622   | 0.441118065 | 0.8432112   | 0.4379078   | 0.6594786   | 1.260567    |            |
| 0.01410419  | 0.1491274   | 0.2881996   | 0.7559055   | 0.7185244   | 1.359685    |            |
| 0.2286903   | 0.2442443   | 0           | 0.2039181   | 1.061185659 | 0.8567515   | 0.9285407  |
| 0.2128589   | 0.6208270   | 0.2913571   | 0.5088767   | 0.1343526   | 0.8253845   |            |
| 0.3996262   | 0.5469084   | 0.334693385 | 0.17699575  | 0.2286923   | 0.1994866   |            |
| 0.1301462   | 1.1006050   | 0.2086113   | 0.3502189   | 0.2438375   | 0.1463943   |            |
| 2.9731310   | 0.1534024   | 3.2018270   | 0.2806450   | 0.9615694   | 0.9228669   | 1.930939   |
| 0.2218463   | 1.0121050   | 0.1895615   | 1.398219904 | 0.5734487   | 0.2176794   |            |
| 0.6998944   | 0.1160631   | 0.0312964   | 0.1114997   | 2.9075      | 0.5662616   |            |
| 0.7198296   | 0.56936     | 2.1295840   | 0.28796733  | 0.09030362  | 0.8679692   | 0.4757499  |
| 0.1445455   | 0.1540251   | 0.600505496 | 1.2044270   | 0.18344     | 0.9152370   | 0.1491644  |



|             |             |             |             |             |             |
|-------------|-------------|-------------|-------------|-------------|-------------|
| 0.3952153   | 0.3351948   | 0.390443968 | 0.4710514   | 1.7426620   | 0.04721089  |
| 0.8502320   | 0.308393073 | 0.2071978   | 0           | 0.08607354  | 0.403726391 |
| 1.060208186 | 0.4824185   | 0.4856026   | 0.02597834  | 0.4062807   | 0.8253282   |
| 0.1111675   | 0.8223123   | 0.2349414   | 0.3844688   | 0.2582578   | 0.2134621   |
| 0.1788342   | 0.270147976 | 0.09058251  | 23.519770   | 0.4457526   | 0.8511006   |
| 0.3439485   | 1.3303332   | 0.0111650   | 0.02601496  | 1.0828340   | 0.3328527   |
| 0.6806043   | 0.1186387   | 0.6032796   | 0.7249292   | 0.5694224   | 0.2612061   |
| 0.03341219  | 1.5233291   | 0.7683380   | 0.4158764   | 0.5424492   | 0.05214733  |
| 0.1394090   | 0.3867969   | 0.4983325   | 0.02040395  | 0.7642855   | 0.9846508   |
| 0.7608995   | 0.5304649   | 1.4870730   | 0.1922747   | 0.2343547   | 0.2294807   |
| 1.4638961   | 0.1168653   | 0.06739301  | 0.9704576   | 0.1336081   | 0.2835984   |
| 0.8871695   | 0.3279780   | 0.5346946   | 0.7036382   | 0.480561622 | 0.4761764   |
| 0.1148081   | 1.3187430   | 0.3932101   | 0.5585596   | 0.664363575 | 0.194830916 |
| 0.1261841   | 0.361328125 | 0.1522171   | 0.3900368   | 1.7647530   | 0.7887363   |
| 0.4364239   | 0.2601938   | 0.4230453   | 0.1267152   | 0.2369036   | 0.1958175   |
| 0.8355266   | 0.422513595 | 0.2298078   | 1.2040810   | 0.2507969   | 0.06460044  |
| 1.6255770   | 0.5531415   | 2.3632690   | 0.1822845   | 1.299618    |             |
| AC091057.1  | 0.2257087   | 0.08285314  | 0.3562343   | 0.06547213  | 0.197494219 |
| 0.2551813   | 0.2556833   | 0.2327127   | 0.7493708   | 0.08123958  | 0.3953199   |
| 0.552109211 | 0.3406059   | 0.242678125 | 0.053264205 | 0.08065812  | 0.1900406   |
| 0.2076007   | 0.1736537   | 0.2093590   | 0.941196943 | 0.9587755   | 0.8490655   |
| 1.1337161   | 0.6286942   | 0.0822311   | 0.7215291   | 0.4865171   | 0.0909510   |
| 0.832039623 | 0.6939796   | 1.270719568 | 0.4937566   | 2.5449330   | 0.5110455   |
| 0.319366488 | 1.1235340   | 0.8462416   | 1.2478260   | 0.8953617   | 0.04004797  |
| 0.9061329   | 0.5848253   | 1.1253120   | 0.7249011   | 1.0885      | 0.8338495   |
| 1.58166     | 1.8672240   | 0.3236730   | 0.6677528   | 1.0083940   | 0.391317    |
| 0.785171308 | 0.5646846   | 1.2518312   | 0.2140930   | 0.9992609   | 0.5799456   |
| 0.9674053   | 1.7602650   | 0.3861699   | 1.5694020   | 0.7112863   | 0.8526759   |
| 1.869773352 | 0.1512767   | 0.7672674   | 0.2317626   | 0.702753609 | 0.8080381   |
| 0.4159165   | 2.338103    | 1.207451863 | 1.4252820   | 0.6189777   | 0.9576659   |
| 1.9500410   | 0.8960296   | 0.2149796   | 1.0981290   | 0.3911426   | 0.3202855   |
| 0.9009062   | 0.109592515 | 0.7220982   | 0.7911286   | 1.0510050   | 0.3460041   |
| 1.3218021   | 0.0989880   | 0.413760769 | 1.0451630   | 0.5870615   | 0.9674149   |
| 1.181708343 | 1.7292970   | 0.1648469   | 0.6491151   | 1.6118732   | 0.511213    |
| 0.3253821   | 0.3612191   | 0.0019810   | 0.5668838   | 0.9091474   | 0.788270569 |
| 3.960953    | 0.285734013 | 0.2125891   | 1.5194780   | 0.9570321   | 1.4333761   |
| 1.4623021   | 1.411994    | 0.2130064   | 0.3917186   | 0.3715150   | 0.3759706   |
| 1.1130530   | 0.8113354   | 0.8648867   | 0.4563506   | 1.6436761   | 0.6049290   |
| 0.4606357   | 0.4458704   | 0.8559591   | 0.291810252 | 0.4922979   | 0.2328489   |
| 0.6527174   | 0.8155828   | 0.419437475 | 1.027281    | 0.4439471   | 0.3746639   |
| 1.1160520   | 0.9094907   | 0.4250603   | 0.8372696   | 0.8061027   | 0.2780818   |
| 0.9254646   | 0.9517928   | 1.2223634   | 0.4347070   | 0.5436701   | 0.5352443   |
| 0.5328752   | 1.0276140   | 0.3165102   | 1.1999470   | 0.869311947 | 0.9621877   |
| 0.6700205   | 0.785762387 | 2.1647651   | 0.1714210   | 0.4274573   | 0.7993833   |
| 0.8334642   | 0.9345168   | 0.800692388 | 0.8559422   | 0.5755523   | 0.7514336   |
| 1.717016    | 0.2719369   | 0.9886152   | 0.4185869   | 0.1720672   | 0.6847619   |
| 0.888268921 | 0.9644792   | 1.7330510   | 0.5530627   | 1.2022660   | 0.8853552   |
| 0.5100810   | 0.9948986   |             |             |             |             |

|             |             |             |             |             |             |
|-------------|-------------|-------------|-------------|-------------|-------------|
| 0.3695876   | 0.6213378   | 0.1694446   | 0.7376466   | 0.3408804   | 0.4895598   |
| 0.7499675   | 0.3498661   | 0.2985424   | 0.46366     | 1.5431110   | 0.707853627 |
| 1.66559     | 0.8668339   | 0.5293316   | 1.0471251   | 1.2642770   | 0.497865247 |
| 1.133071    | 0.8194882   | 1.2773080   | 0.8222519   | 0.375920246 | 0.9682331   |
| 0.5365463   | 0.9477122   | 0.9953470   | 0.7764276   | 1.4103720   | 0.4477179   |
| 0.2600936   | 0.8325117   | 0.1658623   | 1.9456930   | 0.7788561   | 0.4470049   |
| 0.907904154 | 1.385912322 | 1.4348321   | 1.330031723 | 0.990697515 | 0.3139632   |
| 0.900037944 | 0.6405532   | 0.4135288   | 1.4477430   | 0.474342568 | 1.5768920   |
| 0.7824498   | 0.5547129   | 1.074545079 | 0.5992358   | 0.8439831   | 1.3252981   |
| 1.7755681   | 1.3072621   | 1.10998     | 1.0762961   | 1.332985    | 0.1019910   |
| 0.5073489   | 0.4680512   | 0.712817677 | 0.8097485   | 0.574674678 | 0.5911410   |
| 0.5707632   | 0.7234253   | 0.3618406   | 1.1456960   | 0.3424197   | 0.6854963   |
| 0.2080364   | 0.8308703   | 0.499343411 | 0.6365867   | 2.03377     | 1.43205     |
| 3.465034    | 0.3477380   | 0.2925131   | 0.3873372   | 1.2604010   | 0.5747156   |
| 2.1081230   | 0.3348742   | 0.1615960   | 0.1806486   | 0.4536867   | 0.521550479 |
| 1.4254940   | 0.6715008   | 1.375173    | 1.2126171   | 1.3904230   | 0.6700616   |
| 0.5398752   | 0.8766017   | 1.9933631   | 1.730426    | 1.032620565 | 1.387005572 |
| 1.9332720   | 0.5685449   | 0.2380601   | 1.0598931   | 1.028143    | 0.2107901   |
| 0.8985994   | 0.4058605   | 0.8587086   | 2.1452961   | 1.3584610   | 0.8784329   |
| 2.0089210   | 0.3950837   | 1.0410310   | 0.4986106   | 0.9867249   | 1.1189170   |
| 0.98701824  | 1.50199     | 1.0318630   | 0.3435256   | 0.2529529   | 0.3239913   |
| 0.7804267   | 1.610367    | 0.5329217   | 0.6303324   | 0.8042789   | 0.8589640   |
| 0.66421872  | 0.2706159   | 1.9367290   | 0.9046159   | 0.6777258   | 0.6783711   |
| 0.944534822 | 0.9045146   | 0.5913662   | 2.1543550   | 0.5108640   | 0.1766439   |
| 0.9030260   | 0.770109914 | 0.07218488  | 1.5777170   | 0.9003174   | 0.7683692   |
| 0.4883408   | 0.5362460   | 0.5968958   | 0.3693224   | 1.248504569 | 1.315011343 |
| 0.6251588   | 0.9945310   | 0.6180832   | 0.7772419   | 0.2677922   | 0.5235048   |
| 2.1205790   | 0.3498949   | 0.5454435   | 0.3950830   | 0.6888957   | 1.8615040   |
| 0.408654239 | 0.2517097   | 1.8132790   | 0.2880587   | 0.5959805   | 0.9195871   |
| 0.3386929   | 0.7086504   | 0.4925649   | 1.3099260   | 0.6201284   | 0.3708345   |
| 0.4372495   | 1.1635480   | 0.9082591   | 1.1123490   | 0.5013956   | 0.9962466   |
| 0.794951    | 0.6152631   | 0.6040790   | 0.5636543   | 0.4354572   | 0.6733887   |
| 0.6408997   | 0.6283937   | 0.6771333   | 1.1333080   | 0.6225693   | 0.7307152   |
| 0.4233585   | 0.5393621   | 1.606664    | 1.2779660   | 0.5560493   | 0.8248124   |
| 0.5231728   | 0.5444071   | 1.3596260   | 0.3203662   | 0.6150566   | 2.6863910   |
| 0.9635      | 0.7796318   | 1.1010410   | 0.9368331   | 0.587367    | 0.8152193   |
| 0.609809499 | 0.8827620   | 0.3596877   | 1.6319580   | 0.1796891   | 0.6462889   |
| 0.412261326 | 0.42462278  | 0.3879619   | 0.655307403 | 0.3080521   | 1.7986091   |
| 1.602574    | 0.6811419   | 1.2349240   | 0.3969542   | 0.6219546   | 0.3420724   |
| 0.1629902   | 0.9049167   | 0.8541075   | 0.911251963 | 0.3219768   | 1.2624121   |
| 0.0564050   | 0.4118193   | 0.5693868   | 0.7487822   | 0.8991872   | 0.8101282   |
| 0.2979590   | 0.3397501   | AP003071.3  | 0.1213647   | 0.6652881   | 0           |
| 0.691741202 | 0.042721568 | 0.5649917   | 0.9259967   | 0.4443048   | 1.1439620   |
| 0.5623549   | 0.2306912   | 0.620329214 | 0.6163549   | 0.753937722 | 1.262300221 |
| 0.2611543   | 0.2543290   | 0.3887540   | 1.347672    | 0           | 0.085881299 |
| 0           | 0           | 0           | 0.05493097  | 0.1047079   | 0.1285659   |
| 0           | 0           | 0           | 0.056124419 | 0.4596059   | 0.085256776 |
| 0           | 0           | 0           | 0.05326084  | 0.2046321   | 0           |
| 0.0550639   | 0.2431449   | 0.1043719   | 0.1395479   | 0           | 0           |
| 0.09654579  | 0.1746639   | 0           | 0.05451822  | 0           | 0           |
| 0           | 0           | 0           | 0.09904748  | 0           | 0           |
| 0.2166017   |             |             |             |             |             |

|             |             |             |             |             |             |             |             |             |
|-------------|-------------|-------------|-------------|-------------|-------------|-------------|-------------|-------------|
| 0.053684529 | 0           | 0.05360421  | 0.06045486  | 0           | 0.08688068  | 0.5248649   |             |             |
| 0.3901956   | 0.1772583   | 0           | 0.1399862   | 0           | 0           | 0.3389260   | 0           | 0.182421966 |
| 0.06219637  | 0           | 0           | 0           | 0.1501132   | 0           | 0.06161695  | 0           | 0.07706371  |
| 0.3004561   | 0.3214757   | 0.0687123   | 0           | 0           | 0.07909047  | 0           | 0.1249244   |             |
| 0.03856726  | 0.0503226   | 0.175973831 | 0           | 0.03637302  | 0           | 0           | 0           | 0.1356225   |
| 0           | 0           | 0           | 0.05039985  | 0           | 0.1177640   | 0           | 0.133648592 | 0.1335911   |
| 0.108634756 | 0           | 0.07262494  | 0.4314019   | 0.08306594  | 0           | 0           | 0           | 0           |
| 0.05615896  | 0.2549781   | 0           | 0           | 0           | 0           | 0.2485738   | 0           | 0.4626137   |
| 0.420825537 | 0           | 0.09423955  | 0.4537      | 0.2230554   | 0           | 0.1601084   | 0.2820233   |             |
| 0           | 0.05101088  | 0           | 0.09194823  | 0           | 0           | 0           | 0.06108245  | 0.04078807  |
| 0.0590574   | 0.06022793  | 0.08516803  | 0.08304612  | 0.06109352  | 0.06574266  | 0           |             |             |
| 0           | 0.1273694   | 0.10269299  | 0.1153296   | 0           | 0           | 0.2907079   | 0.2070696   | 0           |
| 0.221396044 | 0           | 0           | 0.07088588  | 0           | 0.1197137   | 0.2200197   | 0.06747468  | 0           |
| 0.3216006   | 0           | 0.2428252   | 0           | 0           | 0           | 0.1036389   | 0           | 0.1472067   |
| 0.05145599  | 0           | 0.1568618   | 0.9127399   | 0.3543598   | 0           | 0.3395253   | 0           | 0           |
| 0.07027428  | 0.05620917  | 0.06544946  | 0           | 0.1381040   | 0.1251210   | 0           | 0           |             |
| 0.3153885   | 0           | 0           | 1.532850753 | 0.2100499   | 0.1521299   | 0.06358513  |             |             |
| 0.04232091  | 0           | 0           | 0.05790999  | 0.03093129  | 0.06963377  | 0.3468304   |             |             |
| 0.06780983  | 0           | 0           | 0           | 0           | 0.168557313 | 0.060338519 | 0.1150109   | 0           |
| 0.2394608   | 0           | 0           | 0           | 0           | 0.15320141  | 0.09638822  | 0           | 0.05478676  |
| 0           | 0           | 0.1144381   | 0           | 0.2742052   | 0           | 0.1597926   | 0           | 0.09863561  |
| 0.113100016 | 0.4850171   | 0.3829439   | 0           | 0.07381812  | 0           | 0.1998210   | 0.07382441  |             |
| 0.6883829   | 0           | 0.15597476  | 0.04884955  | 0.1425508   | 0           | 0.04841189  |             |             |
| 0.09641717  | 0.05097223  | 0.2626868   | 0.06225807  | 0.5501306   | 0           | 0           |             |             |
| 0.1192621   | 0.2014665   | 0.1161665   | 0           | 0.03930745  | 0.1154103   | 0           |             |             |
| 0.03789298  | 0           | 0           | 0           | 0.06504454  | 0.06559125  | 0           | 0.071173797 |             |
| 0.09474881  | 0.1049003   | 1.1438840   | 0.1749724   | 0           | 0.3340631   | 0.2121495   |             |             |
| 0.1177366   | 0           | 0           | 0           | 0.04186848  | 0.3379703   | 0           | 0.06318982  |             |
| 0.04351456  | 0           | 0.158425242 | 0.1120038   | 0           | 0.2372491   | 0.06611792  |             |             |
| 0.07131474  | 0.1758967   | 0.08213166  | 0.0879773   | 0.1004245   | 0.07207745  |             |             |             |
| 0.04043883  | 0.087491713 | 0.6790536   | 0           | 0           | 0.2080257   | 0           | 0.077454622 |             |
| 0.2185896   | 0           | 0.1800466   | 0.2185066   | 0.04221434  | 0.1697344   | 0.053382011 |             |             |
| 0.2012586   | 0.3008321   | 0           | 0.04008442  | 0.08784147  | 0           | 0           | 0.5148538   | 0           |
| 0           | 0.02971031  | 0           | 0.05919655  | 0           | 0           | 0.1085641   | 0           | 0.1070716   |
| 0.1487691   | 0.06790258  | 0           | 0           | 0.048598665 | 0.0619228   | 0.1093760   | 0.14173     | 0           |
| 0.1093607   | 0.2706620   | 0           | 0           | 0           | 0           | 0           | 0.1085279   | 0.2186322   |
| 0.2289259   | 0           | 0           | 0.03293862  | 0.07107396  | 0.04944291  | 0.2138895   | 0           |             |
| 0.06436008  | 0.09793219  | 0           | 0           | 0.1971587   | 0.04579005  | 0           | 0.07110378  |             |
| 0.04362975  | 0           | 0           | 0.9082209   | 0           | 0           | 0.04993116  | 0.2303515   | 0           |
| 0.04406131  | 0           | 0.1358836   | 0           | 0.1057169   | 0.172902672 | 0.03969723  |             |             |
| 0.1121193   | 0           | 0.17342     | 0.3861253   | 0.100925177 | 0.266375383 | 0           | 0           |             |
| 0.1486523   | 0           | 0           | 0.07955793  | 0.1185801   | 0.04986147  | 0.3937425   |             |             |
| 0.02744896  | 0.2974713   | 0           | 0.096277688 | 0.07480861  | 0           | 0.06594093  |             |             |
| 0.2649677   | 0.0429056   | 0.1361530   | 0.05961426  | 0.5902622   | 0.1794803   |             |             |             |

|                    |                     |                            |                     |                   |                  |            |
|--------------------|---------------------|----------------------------|---------------------|-------------------|------------------|------------|
| AC073130.2         | 0.1937599           | 0.6970289                  | 0.2801923           | 0.552185998       | 0.10230814       |            |
| 0.3507836          | 0.5015876           | 0.8106711                  | 0.7134172           | 0.2525078         | 0.09207523       |            |
| 0.330120672        | 0.3608063           | 0.138884929                | 0.56309165          | 0.4951110.1522646 |                  |            |
| 0.03103249         | 0.03585955          | 0.1095336                  | 0                   | 0.2799531         | 0.1355158        | 0.08788292 |
| 0.1534713          | 0.3552302           | 0.1539426                  | 0.1846297           | 0.4066811         | 0                | 0.1426767  |
| 0.323269149        | 0.01894676          | 0.4038995                  | 0.05444955          | 0.035148799       | 0.1758202        |            |
| 0.06469722         | 0.2499463           | 0.7240666                  | 0                   | 0.02120365        | 0.4238750.348566 |            |
| 0.7228649          | 0.2611167           | 0.0608099                  | 0.07689681          | 0.1486808         | 0.2767281        |            |
| 0.06778097         | 0.1779015           | 0.08645171                 | 0.12856186          | 0.2802259         | 0.256739         |            |
| 0.2171628          | 0.08326011          | 0.2253971                  | 0.07855802          | 0.4672135         | 0.1650803        |            |
| 0.0789848          | 0.0838085           | 0.1025799                  | 0.088470613         | 0                 | 0.2190324        | 0.1184267  |
| 0.485397597        | 0.17377             | 0.2282474                  | 0.07937874          | 0.298256689       | 0.2097001        |            |
| 0.02779922         | 0.1721512           | 0.2486161                  | 0.3862217           | 0.1230330         | 0.03997345       | 0          |
| 0.1508374          | 0                   | 0.06128819                 | 2.41489             | 0.1622520         | 0.1077528        | 0.1606811  |
| 0.087795014        | 0.05499608          | 0.0580699                  | 0.3214333           | 0.078900832       | 0.1924374        | 0          |
| 0.1347370.07174819 | 0.06640387          | 0.1810437                  | 0.05888974          | 0.2585157         |                  |            |
| 0.1653639          | 0.1267567           | 0.195590414                | 7.9446650.021679564 | 0                 | 0.4347992        |            |
| 0.0765264          | 0.2652313           | 0.2263078                  | 0.1877189           | 0.05079323        | 0                | 0.1569021  |
| 0.1221226          | 0.08277866          | 0                          | 0.2208460.3996042   | 0                 | 0.4095233        | 0.3472444  |
| 0                  | 0.1846419           | 0                          | 0.04756104          | 0.1316476         | 0.2897347        | 0.06677067 |
| 0.041591865        | 0.08520493          | 0.1125633                  | 0.2474083           | 0.4479167         | 0.3400616        |            |
| 0.2201945          | 0.05071862          | 0.02935758                 | 0.2166160.04669408  | 0.1462781         | 0                |            |
| 5.0949620          | 0.09615452          | 0.2379504                  | 0.06629199          | 0                 | 0.1049588        | 0          |
| 0.1016733          | 0.163950422         | 0.2761872                  | 0                   | 0.1230201         | 0.3480886        | 0.05509813 |
| 0.1970408          | 0.176730539         | 0.1113310.1092760.02829251 | 0.04960493          | 0.09556212        |                  |            |
| 0.08781592         | 0.1974940           | 0.3117306                  | 0.238026771         | 0.2584486         | 0.0557206        |            |
| 0.1613322          | 0.0437855           | 0.2570165                  | 0.1240955           | 0.2565882         | 0                | 0.1848376  |
| 0.1212167          | 0                   | 0.2602140                  | 0.07743428          | 0.1742322         | 0                | 0.4956735  |
| 0.3365809          | 0.112173152         | 0.3134722                  | 0.02061969          | 0.08268165        | 0.2456246        |            |
| 0.07490885         | 0.3580050.020352055 | 0.02325412                 | 0.02517605          | 0.1292180.1730057 |                  |            |
| 0.094123543        | 0.3074013           | 0.09107889                 | 0.05075716          | 0.1182401         | 0.192267         |            |
| 0.4049671          | 0.0924539           | 0.1604919                  | 0.2223421           | 0.03460739        | 0.243583         |            |
| 0.1044703          | 0.04919642          | 0.380456179                | 0.200920852         | 0.1064461         | 0.089701165      |            |
| 0.096331071        | 0.06885603          | 0.249621798                | 0.1133447           | 0.3504432         | 0.06945885       |            |
| 0.113111132        | 0.2942794           | 0.2557348                  | 0.1305006           | 0.214014183       | 0.1154136        |            |
| 0.2790991          | 0.08746763          | 0.4035218                  | 0.3281349           | 0.02365264        | 0                | 0.1566516  |
| 0.03648096         | 0.01770465          | 0.1913330                  | 0.07873639          | 0.090282673       | 0.1774517        |            |
| 0.1681278          | 0.2464387           | 0                          | 0.1973492           | 0.05981554        | 0                | 0          |
| 0.06225383         | 0.05849161          | 0.1991358                  | 0.0788042           | 0.4057729         | 0.03848275       |            |
| 0.08137769         | 0.2096911           | 0.1242446                  | 0.3136747           | 0.2182265         | 0.05199774       |            |
| 0.2142036          | 0                   | 0.02318262                 | 0.195635483         | 0.2823964         | 0.1381903        | 0.06222617 |
| 0.8620757          | 0.1370615           | 0.1028482                  | 0.09164397          | 0.05278197        | 0.1817275        |            |
| 0.2356135          | 0.365279324         | 0.085222278                | 0.2079927           | 0.1256058         | 0.2029137        |            |
| 0.3259027          | 0.1034888           | 0.08888921                 | 0.07257833          | 0.07048788        | 0.5810943        |            |

|             |             |             |             |             |             |
|-------------|-------------|-------------|-------------|-------------|-------------|
| 0.1395176   | 0.4582853   | 0.08146056  | 0.3175065   | 0.6295019   | 0.1600244   |
| 0.0756624   | 0.2084143   | 0.08620193  | 0.231850246 | 0.08940761  | 0.0237572   |
| 0.1420390   | 0.05277897  | 0           | 0.1170087   | 0.9178683   | 0.07022834  |
| 0.1603288   | 0.3164491   | 0.2743843   | 0.087300892 | 0.1971120   | 0.2631357   |
| 0.07947342  | 0.08302881  | 0.02334731  | 0.386428456 | 0.08724516  | 0.01668363  |
| 0.1976193   | 0.2034947   | 0.4043738   | 0.1354913   | 0.170449868 | 0.1807377   |
| 0.6483801   | 0.02146885  | 0.2399820   | 0.227889701 | 0.07066641  | 0.1698316   |
| 0.02935605  | 1.042008902 | 0.164627374 | 0.07114923  | 0.03117525  | 0.04725396  |
| 0.02463381  | 0.1518119   | 0.1299927   | 0.12748     | 0.06410287  | 0.07917047  |
| 0.1084072   | 0.1045375   | 0.1016547   | 0.096985341 | 0.0247151   | 8.4690650   |
| 0.0848525   | 0.2752232   | 0.1309466   | 0.2160573   | 0.2494267   | 0.01774521  |
| 0.07034454  | 0.2050720   | 0.05926606  | 0.08421482  | 0.1132955   | 0.08663293  |
| 0.1745243   | 0.2358215   | 0.2558378   | 0           | 0.0724944   | 0.2366408   |
| 0.1134703   | 0.09867014  | 0.05691281  | 0           | 0.1027515   | 0.1563498   |
| 0           | 0.1391785   | 0.07869148  | 0.2010368   | 0.2821864   | 0.1702769   |
| 0.2437937   | 0           | 0.06912734  | 0.1318167   | 0.3169989   | 0.07007041  |
| 0.05978671  | 0.03064655  | 0.2019552   | 0.0857752   | 0.08793041  | 0.1956047   |
| 0           | 0.1411833   | 0.02109726  | 0.069010227 | 0.1109098   | 0.02237496  |
| 0.8701387   | 0           | 0.5308345   | 0.080564045 | 0.297689741 | 0.07377611  |
| 0.140838599 | 0           | 0.1816928   | 0.4012552   | 0.1687872   | 0.06350753  |
| 0.0709929   | 0.2587142   | 0.0314307   | 0.0876451   | 0.2176699   | 0.1464029   |
| 0.038427082 | 0           | 0.3982170   | 0.1315942   | 0.1762599   | 0.1712481   |
| 0.1811414   | 0.1658490   | 0.4758739   | 0.2355899   | 0.07163555  |             |
|             | AL132642.1  | 0.08032453  | 2.0915070   | 0.1858491   | 1.030106473 |
| 0.056550069 | 0.2908396   | 1.1819551   | 0.0082082   | 2.2713760   | 0.6280731   |
| 0.2035756   | 0.319325587 | 0.7886668   | 0.345454285 | 2.16233196  | 0.04321088  |
| 0.2945709   | 0.05145893  | 0           | 0.07784216  | 0           | 0           |
| 0.02808952  | 0           | 0           | 0.2079009   | 0.0567271   | 0.3618232   |
| 0           | 0.074291274 | 0.6421739   | 0.056426727 | 0           | 0.07050078  |
| 0           | 0           | 0.03644374  | 0           | 0.06907799  | 0           |
| 0           | 0.04434003  | 0.03516048  | 0.1916949   | 0.07706691  | 0           |
| 0           | 0           | 0           | 0           | 0           | 0           |
| 0.06555403  | 0.03746543  | 0.1361544   | 0           | 0.035530809 | 0           |
| 0           | 0.04001172  | 0.02761285  | 0           | 0.08684473  | 0           |
| 0.1173174   | 0           | 0           | 0           | 0           | 0           |
| 0           | 0           | 0.201224953 | 0           | 0.09462154  | 0           |
| 0.044961595 | 0.07451368  | 0           | 0.04078084  | 0.04580691  | 0           |
| 0.05100419  | 0           | 0           | 0.08510676  | 0.04547685  | 0           |
| 0           | 0           | 0.06726271  | 0           | 0           | 0           |
| 0.087350482 | 0.06079736  | 0           | 0.03807212  | 0           | 0.1063684   |
| 0           | 0           | 0           | 0           | 0           | 0           |
| 0.07794145  | 0           | 0.03503191  | 0.088454583 | 0.7957489   | 0.035949657 |
| 0           | 0           | 0.4124192   | 0           | 0.05360998  | 0           |
| 0           | 0           | 0           | 0           | 0           | 0           |
| 0           | 0           | 0           | 0.02546409  | 0           | 0.2467758   |
| 0           | 0.4373976   | 0.055704212 | 0           | 0.3430456   | 0.1501394   |
| 0.0369070   | 0.068968789 | 0.07064459  | 0           | 0           | 0.03376127  |
| 0           | 0           | 0.1121374   | 0.04868155  | 0.0513141   | 0           |
| 0           | 0           | 0           | 0           | 0           | 0           |
| 2.3264280   | 0           | 0           | 0           | 2.9152650   | 0           |
| 0.04214935  | 0           | 0.03816512  | 0           | 0.4232875   | 0           |
| 0           | 0           | 0.036632438 | 0           | 0           | 0.04691543  |
| 0.1096750   | 0.03961594  | 0.2184282   | 0.01488591  | 0           | 0.5473275   |
| 0.049337828 | 0           | 0           | 0           | 0           | 0.07991098  |
| 0.03429643  | 0.07091361  | 0           | 0.2383911   | 0           | 0.1730302   |
| 1.1218850   | 0           | 0.2247129   | 0           | 0.1297799   | 0           |
| 0           | 0           | 0.08663473  | 0.03419214  | 0           | 0.2898372   |
| 0.03124494  | 0.033748344 | 0.5398488   | 0           | 0           | 0           |

|             |             |             |            |             |             |             |            |             |
|-------------|-------------|-------------|------------|-------------|-------------|-------------|------------|-------------|
| 0.702352258 | 0.1621904   | 0           | 0          | 0           | 0.1062741   | 0           | 0.03832741 | 0.02047171  |
| 0.04608672  | 0           | 0           | 0          | 0           | 0.126176606 | 0.111057517 | 0.2353492  | 0.037186243 |
| 0.119804148 | 0.07611932  | 0.045992202 | 0          | 0.2641430   | 0           | 0.05422026  |            |             |
| 0.06058093  | 0           | 0           | 0          | 0           | 0.3626032   | 0.04614697  | 0          | 0.3029609   |
| 0           | 0           | 0.07931841  | 0          | 0           | 0.074854622 | 0.7757642   | 0.2281044  | 0.02724343  |
| 0           | 0           | 0.0330626   | 0.04886028 | 0.03796687  | 0           | 0.103231034 | 0.1939848  | 0           |
| 0.08711688  | 0.03204114  | 0           | 0          | 0.1303934   | 0           | 0.07802162  | 0.0904673  | 0           |
| 0.07893298  | 0           | 0           | 0          | 0           | 0.06879011  | 0           | 0          | 0.02917484  |
| 0.04304937  | 0           | 0.075714543 | 0.09421197 | 0           | 0           | 0.7991331   | 0.5018194  |             |
| 0.08580397  | 0.07369928  | 0.08023427  | 0          | 0.07708694  | 0           | 0.09499269  |            |             |
| 0.02701603  | 0.02771042  | 0.2982450   | 0.02041207 | 0.08364367  | 0.05759975  | 0           | 0          |             |
| 0.0741291   | 0.3939485   | 0.2355330   | 0.04719927 | 0           | 0           | 0           | 0.06646543 |             |
| 0.04770406  | 0           | 0           | 0.6945704  | 0.06233413  | 0.04392834  | 0.1721009   |            |             |
| 0.1161455   | 0.076894371 | 0.04822412  | 0          | 0.08937215  | 0.0482058   | 0.02793933  |            |             |
| 0.1685066   | 0.07066118  | 0.1332019   | 0.03982081 | 0.1424010   | 0.2122372   |             |            |             |
| 0.116274784 | 0.0585905   | 0.05632388  | 0.04867902 | 0.296209402 | 0           | 0.03932721  |            |             |
| 0.02584784  | 0           | 0           | 0          | 0.08455636  | 0           | 0.2953860   | 0          | 0.096494276 |
| 0           | 0.6515091   | 0           | 0.02852393 | 0           | 0.1074817   | 0           | 0          | 0.04857944  |
| 0           | 0           | 0           | 0          | 0.1007803   | 0.08014149  | 0.02180025  | 0          | 0           |
| 0.08519272  | 0           | 0           | 0          | 0.1304884   | 0.09091768  | 0.06684705  | 0          | 0.08662832  |
| 0           | 0.4012011   | 1.47543     | 0.1051313  | 0           | 0.09913998  | 0           | 0          | 0.2489109   |
| 0.02916173  | 0           | 0           | 0.03901901 | 0           | 0           | 0.02627339  | 0          | 0.1703699   |
| 0           | 0           | 0.0815584   | 0          | 0           | 0           | 0.1865918   | 0.05265498 | 0.1177224   |
| 0.03300054  | 0           | 0.03633389  | 0.06562659 | 0           | 0.031860428 | 0.04951167  |            |             |
| 0.04127091  | 0           | 0.0584558   | 0.3123652  | 0.03003737  | 0.02750154  | 0.1183661   |            |             |
| 0.2604412   | 0.02969701  |             |            |             |             |             |            |             |
| AC087276.3  | 0.1316968   | 0           | 0.1741204  | 0           | 0.039735944 | 0.08758448  | 0.0307601  |             |
| 0           | 0.0332505   | 0.0326909   | 0.1072846  | 0.096162851 | 0.2102029   | 0.080913265 |            |             |
| 0           | 0.1821775   | 0.02956938  | 0          | 0           | 0.2734861   | 0           | 0.09785909 | 0.256589    |
| 0.1433597   | 0.3831906   | 0.07304271  | 0.2391620  | 0.3715840   | 0.06318112  | 0.078303192 |            |             |
| 0.04749845  | 0.237895654 | 0.06622939  | 0.1238467  | 0.09516563  | 0.12286448  |             |            |             |
| 0.3072944   | 0.1884604   | 0.1941557   | 0.1297955  | 0           | 0.04941232  | 0.2244966   |            |             |
| 0.5415248   | 0.1831024   | 0.7859768   | 0.04723649 | 0.02986632  | 0.1347427   |             |            |             |
| 0.1842510   | 0.1842804   | 0.1116166   | 0.1007322  | 0.249663756 | 0.1187326   |             |            |             |
| 0.2492902   | 0.1968048   | 0.07761069  | 0.1616179  | 0.09153457  | 0.2540486   |             |            |             |
| 0.08243526  | 0.1227091   | 0.1953047   | 0.1195245  | 0.171807607 | 0           | 0.2764809   |            |             |
| 0.2759780   | 0.1446243   | 0.2659502   | 0.2312271  | 0           | 0.1221696   | 0.1295649   |            |             |
| 0.1719324   | 0.1931224   | 0.3706043   | 0.03583903 | 0.1723959   | 0.2328821   | 0           |            |             |
| 0.1437982   | 0.073080244 | 0.08926504  | 0.1103448  | 0.2126852   | 0.05809697  |             |            |             |
| 0.07174392  | 0.1404173   | 0.163675787 | 0.08544076 | 0.1014932   | 0.3210249   |             |            |             |
| 0.413703028 | 0.1868542   | 0.0315361   | 0.5494771  | 0.2786662   | 0.01934319  |             |            |             |
| 0.3515822   | 0.3087783   | 0.05476699  | 0.1070441  | 0.1723107   | 0.145026553 |             |            |             |
| 2.1123350   | 0.101042747 | 0.04134728  | 0.3039727  | 0.04458368  | 0.07726083  |             |            |             |
| 0.6215557   | 0.1822726   | 0.1183669   | 0.4908684  | 0.3134055   | 0.1660112   |             |            |             |

|             |             |             |             |             |             |
|-------------|-------------|-------------|-------------|-------------|-------------|
| 0.0321508   | 0.04424292  | 0.2573263   | 0.2328063   | 0.1968209   | 0.647588    |
| 0.2601023   | 0.07923569  | 0.1844073   | 0.039141587 | 0.2770869   | 0.2191339   |
| 0.02109964  | 0.1815337   | 0           | 0.1240993   | 0.1311569   | 0.2882762   |
| 0.02830246  | 0.1710447   | 0.1969885   | 0.1026210   | 0.2704260   | 0.05440721  |
| 0.01896878  | 2.6671540   | 0.02746507  | 0.1680566   | 0.19804     | 0.1158636   |
| 0           | 0.235138578 | 0.2134672   | 0.1777021   | 0.095516224 | 0.08045226  |
| 0.3726867   | 0.4326265   | 0.2246982   | 0.1721916   | 0.128702274 | 0.2918726   |
| 0.06366335  | 0.1318640   | 0.2119292   | 0.0835106   | 0.05116086  | 0.1568979   |
| 0.3170465   | 0.06409829  | 0.242676913 | 0.07528506  | 0.03246238  | 0.3968502   |
| 0.1020363   | 0.2058867   | 0           | 0.2242294   | 0.6845954   | 0.1435799   |
| 0.04863313  | 0.02425578  | 0.08239879  | 0.1203003   | 0.1353417   | 0.1088712   |
| 0.09119226  | 0.6536312   | 0.026140478 | 0.1521887   | 0.09610294  | 0           |
| 0.1163768   | 0.0658645   | 0.047427788 | 0.1083813   | 0.02933474  | 0.3199458   |
| 0.2419003   | 0           | 0           | 0.03537456  | 0.1182829   | 0.1377715   |
| 0.3774890   | 0.1346573   | 0.05753928  | 0.2914531   | 0.08064798  | 0.1892127   |
| 0.1014393   | 0.2866144   | 0.132990464 | 0.117054905 | 0.2480587   | 0.156777577 |
| 0.056121723 | 0.1337166   | 0           | 0.3433754   | 0.03712099  | 0.2225640   |
| 0.2666920   | 0.1489891   | 0.1520573   | 0.106871123 | 0.04482604  | 0.04645741  |
| 0.05095795  | 0.2594082   | 0.1147013   | 0.1377984   | 0.1596608   | 0.2028089   |
| 0.04250703  | 0.4951003   | 0.2415163   | 0.219625601 | 0.2293560   | 0.052597974 |
| 0.3195443   | 0.03561816  | 0.09571549  | 0.0686593   | 0.2299482   | 0.1393923   |
| 0.3089931   | 0.1867468   | 0.3271640   | 0.193432485 | 0.1817427   | 0.06629427  |
| 0.1377321   | 0.1125715   | 0.1120987   | 0.28446     | 0.09162329  | 0.1737214   |
| 0.05482332  | 0.4767638   | 0.2726413   | 0.08319556  | 0.04684672  | 0.08103606  |
| 0.364722211 | 0.09140105  | 0.1073448   | 0.1450099   | 0.08811202  | 0.06388078  |
| 0.1497964   | 0.1334776   | 0.2050024   | 0.1814966   | 0.03050368  | 0.212808856 |
| 0.099299656 | 0.1101590   | 0.1951385   | 0.2659858   | 0.2441164   | 0.06029173  |
| 0.1553585   | 0.07047261  | 0           | 0.8937481   | 0.1083758   | 0.4672385   |
| 0.1752411   | 0.1571755   | 0.4016016   | 0.02938688  | 0.2226044   | 0.07533084  |
| 0.049117864 | 0.2604409   | 0.05536304  | 0.07355627  | 0           | 0.1658272   |
| 0.5347429   | 0.1227434   | 0.04670315  | 0.2681611   | 0.1504509   | 0.142410273 |
| 0.1722539   | 0.1752009   | 0.06173412  | 0.1209298   | 0.02720392  | 0.180104139 |
| 0.05082834  | 0.1166370   | 0.08373198  | 0.06774539  | 0.03926417  | 0.1578724   |
| 0.049651375 | 0.07019757  | 0.1399041   | 0.1500910   | 0.2236986   | 0.020425653 |
| 0.08233939  | 0           | 0.06841042  | 0.104068488 | 0.054806064 | 0.04145098  |
| 0.02752978  | 0.3444352   | 0.08844443  | 0.0504885   | 0.08912261  | 0.07469166  |
| 0.02306204  | 0           | 0.01740078  | 0.1184464   | 0.090404633 | 0.05759528  |
| 0.1647813   | 0.1202572   | 0.1780064   | 0.3020959   | 0.1585244   | 0.06202932  |
| 0.1639287   | 0.1706762   | 0.2301863   | 0.1717201   | 0.3205960   | 0.1514150   |
| 0.1777959   | 0.1916346   | 0.07081516  | 0.4786595   | 0.2604118   | 0.1983207   |
| 0.2759253   | 0.03315695  | 0.02770023  | 0.05986223  | 0.0683161   | 0.1377634   |
| 0           | 0.1916549   | 0.1878852   | 0.09920197  | 0.2637742   | 0.02351047  |
| 0.07679539  | 0.2954897   | 0.1360749   | 0.04644169  | 0.2142533   | 0.1045844   |
| 0.2254013   | 0.1424472   | 0.5687426   | 0.1096697   | 0.02458219  | 0           |
|             |             |             |             |             | 0.01846148  |

|             |             |             |             |             |             |             |             |             |            |
|-------------|-------------|-------------|-------------|-------------|-------------|-------------|-------------|-------------|------------|
| 0.1042838   | 0.4110292   | 0.2016255   | 0.2194748   | 0.093871956 | 0.024775957 |             |             |             |            |
| 0.05730851  | 0.131282333 | 0.0691318   | 0.09073098  | 0.4675362   | 0.3113914   |             |             |             |            |
| 0.05549848  | 0.1378664   | 0.2086959   | 0.07324512  | 0.1531840   | 0.06917059  |             |             |             |            |
| 0.1949559   | 0.067161945 | 0.1043708   | 0.4059967   | 0           | 0.1232251   | 0.1197213   |             |             |            |
| 0.2321694   | 0.1352712   | 0.1386202   | 0.3965082   | 0.1669372   |             |             |             |             |            |
| AC068790.6  | 0           | 0           | 0           | 0           | 0.08905554  | 0.09383023  | 0           | 0           | 0.04985995 |
| 0.09777799  | 0.05829093  | 0           | 0           | 0.1852374   | 0           | 0           | 0           | 0.1668477   | 0          |
| 0.1990054   | 0.2408295   | 0.1249436   | 0.1558507   | 0.07426952  | 0.3039737   |             |             |             |            |
| 0.1193132   | 0.09636346  | 0           | 0           | 0.181418488 | 0           | 0           | 0           | 0.062464048 |            |
| 0.07811391  | 0           | 0.2961250   | 0.1979634   | 0.0950389   | 0           | 0.1369603   | 0.2477791   |             |            |
| 0           | 0.3093592   | 0           | 0           | 0.05871676  | 0.5620369   | 0.2409114   | 0.04863914  | 0           |            |
| 0.076157122 | 0           | 0           | 0.2572846   | 0.1183713   | 0.1232493   | 0.09307197  |             |             |            |
| 0.2214133   | 0.1676397   | 0           | 0.0992925   | 0           | 0.104815958 | 0.1923208   |             |             |            |
| 0.2594997   | 0.08418398  | 0.08626155  | 0           | 0.2028128   | 0.07053324  | 0.096371171 |             |             |            |
| 0.05323781  | 0           | 0           | 0.1963660   | 0           | 0.08764572  | 0.1420762   | 0           | 0.04873779  |            |
| 0.111461535 | 0           | 0.05609906  | 0.07208581  | 0.08860914  | 0.1094234   | 0           |             |             |            |
| 0.124818647 | 0.1954706   | 0.2063957   | 0.1632084   | 0.140217176 | 0.1139956   | 0           |             |             |            |
| 0.2394455   | 0           | 0.05900421  | 0.07149746  | 0           | 0           | 0           | 0           | 0.252792685 |            |
| 11.181270   | 0           | 0.3090782   | 0           | 0           | 0.2872706   | 0           | 0           | 0           | 0.07234264 |
| 0.1961448   | 0           | 0           | 0.1775373   | 0.2729001   | 0.1559522   | 0           | 0           | 0.09375228  |            |
| 0           | 0           | 0.06684433  | 0           | 0           | 0           | 0.3028408   | 0           | 0.1465590   | 0.1447285  |
| 0.1304382   | 0           | 0           | 0.1649808   | 0           | 0.2599555   | 0           | 6.2987260   | 0.0837791   | 0          |
| 0.1208198   | 0.1767144   | 0.08666755  | 0.09326284  | 0           | 0.3906947   | 0.09034338  |             |             |            |
| 0.072840376 | 0.1636070   | 0.1654720   | 0.1748983   | 0           | 0.1958333   | 0.1750837   |             |             |            |
| 0.078518364 | 0.09892496  | 0.09709894  | 0           | 0.1175393   | 0           | 0.1560605   |             |             |            |
| 0.1914398   | 0.1611858   | 0.1955246   | 0           | 0.1148243   | 0           | 0.0637130   |             |             |            |
| 0.1712821   | 0.07351134  | 0.6839865   | 0           | 0.07299571  | 0.0861672   | 0           |             |             |            |
| 0.07398955  | 0           | 0           | 0.1106998   | 0           | 0.1993828   | 0           | 0.09284691  | 0           |            |
| 0.09795746  | 0           | 0           | 0.3348537   | 0           | 0           | 0           | 0.1229816   | 0           | 0.09932593 |
| 0.2158122   | 0           | 0.06003664  | 0.07592971  | 0.3454463   | 0           | 0.08775855  |             |             |            |
| 0.2963484   | 0.2460076   | 0.2885860   | 0.3094293   | 0           | 0.405672461 | 0.059510472 |             |             |            |
| 0.1261125   | 0           | 0           | 0.098580185 | 0.6445712   | 0.1132334   | 0.06171876  |             |             |            |
| 1.00506694  | 0.1162163   | 0.2596997   | 0.06626195  | 0           | 0           | 0           | 0           | 0.2472798   |            |
| 0.3498833   | 0.2522032   | 0           | 0.1237291   | 0           | 0           | 0.05667065  | 0.083742901 | 0           |            |
| 0           | 0.05733729  | 0.2172984   | 0.2335755   | 0           | 0.3006134   | 0.1417335   |             |             |            |
| 0.3141830   | 0.09072517  | 0.073755507 | 0           | 0.1011116   | 0           | 0.1373547   | 0           |             |            |
| 0.07230944  | 0           | 0           | 0.1114883   | 0           | 0           | 0           | 0           | 0.05576173  | 0          |
| 0.07372274  | 0.1612655   | 0.2922917   | 0.09138742  | 0           | 0.1250673   | 0           | 0           |             |            |
| 0.081143687 | 0.10096748  | 0           | 0.4464361   | 0           | 0           | 0           | 0.07898392  | 0           | 0          |
| 1.4870610   | 0.2036084   | 0.05790646  | 0           | 0.1598154   | 0.1750058   | 0.1792828   |             |             |            |
| 0.3086498   | 0           | 0.074914262 | 0.1588891   | 0.1688787   | 0.1121876   | 0           |             |             |            |
| 0.1011674   | 0.08317596  | 0.8155865   | 0           | 0           | 0           | 0.4589337   | 0.062058076 | 0           |            |
| 0           | 0           | 0.07377657  | 0           | 0.16481623  | 0           | 0.05929803  | 0           | 0.3099745   | 0          |
| 0.1203930   | 0           | 0.08535236  | 0.3815298   | 0.1705918   | 0           | 0           | 0           | 0.1043391   |            |



|             |             |             |             |             |             |            |                         |
|-------------|-------------|-------------|-------------|-------------|-------------|------------|-------------------------|
| 0.105816408 | 0           | 0.04214718  | 0.2216101   | 0           | 0.08755507  | 0.1798599  |                         |
| 0.1540095   | 0.2718585   | 0           | 0           | 0           | 0           | 0          | 13.343870 0.06113849    |
| 0.07756979  | 0           | 0.4835609   | 0           | 0.1250115   | 0.1041257   | 0.3510787  |                         |
| 0.1496608   | 0.05752599  | 0           | 0.2067685   | 0           | 0           | 0          | 0.1717761 0.2336344     |
| 0.1008258   | 0.07013994  | 0.3034247   | 0.2534893   | 0           | 0.2083906   | 0.1050580  |                         |
| 0           | 0.1948739   | 0.1432807   | 0.5043408   | 0.4332535   | 0           | 0.06142419 | 0                       |
| 0.4506791   | 0.5811137   | 0           | 0           | 0.1595115   | 0           | 0          | 0.2607115 0             |
| 0.08363377  | 0           | 0           | 0.2252587   | 0           | 0.08358655  | 0          | 0 0.151152543 0         |
| 0.1001155   | 0           | 0           | 0           | 0.3999429   | 0           | 0          | 0.07073372 0 0.03893922 |
| 0.07033237  | 0           | 0           | 0           | 0.3538421   | 0           | 0          | 0.2434643 0.1287649     |
| 0.1768413   | 0.2537072   | 0           | 0.1273058   |             |             |            |                         |
| GTF3C2-AS1  | 0.08648118  | 0.01871315  | 0.06318754  | 0           | 0.048066689 | 0.09182056 |                         |
| 0.04465084  | 0.04284807  | 0.01608862  | 0.01186339  | 0.09516988  | 0.062039278 |            |                         |
| 0.1386941   | 0.045675907 | 0.033417253 | 0.3158658   | 0.08584484  | 0.00874786  |            |                         |
| 0.02527145  | 0.2117268   | 0.202915359 | 0.1025921   | 0.1623545   | 0.05945673  |            |                         |
| 0.2224932   | 0.08246588  | 0.1735818   | 0.02838869  | 0.09171266  | 0.037887865 |            |                         |
| 0.07469362  | 0.110312256 | 0.02136388  | 0.1378265   | 0.1688388   | 0.039632891 |            |                         |
| 0.1486878   | 0.06383207  | 0.1526596   | 0.0314015   | 0.02261301  | 0.05977174  |            |                         |
| 0.3476005   | 0.1572136   | 0.06201727  | 0.2698928   | 0.04571179  | 0.06503016  |            |                         |
| 0.05588291  | 0.04457593  | 0.0764281   | 0.04629166  | 0.08935735  | 0.108722311 |            |                         |
| 0.02872505  | 0.1206218   | 0.2448673   | 0.04694099  | 0.4398785   | 0.1181067   |            |                         |
| 0.2546287   | 0.09307016  | 0.08906125  | 0.04725017  | 0.0650624   | 0.166262018 |            |                         |
| 0.05338631  | 0.2984286   | 0.09347449  | 0.027366099 | 0.1049671   | 0.04825611  |            |                         |
| 0.1062877   | 0.084076663 | 0.1055591   | 0.04701855  | 0.1178545   | 0.1012314   |            |                         |
| 0.1472994   | 0.0780350   | 0.1737826   | 0.1126826   | 0.03616972  | 0.06571287  |            |                         |
| 0.026520513 | 0.05183025  | 0.04894224  | 0.1029101   | 0.02811086  | 0.08678522  |            |                         |
| 0.1811799   | 0.103945194 | 0.06717987  | 0.03273907  | 0.1294429   | 0.155691497 |            |                         |
| 0.1898641   | 0.03814773  | 0.05697227  | 0.1213521   | 0.03743766  | 0.1417641   |            |                         |
| 0.1992077   | 0.1192483   | 0.0776917   | 0.08337443  | 0.085209708 | 3.231566    |            |                         |
| 0.067224643 | 0.03000951  | 0.1225671   | 0.1563992   | 0.1495340   | 0.08657856  |            |                         |
| 0.1763893   | 0.05011401  | 0.02226676  | 0.08845942  | 0.09753913  | 0.2255695   |            |                         |
| 0.05351857  | 0.07608955  | 0.1408074   | 0.0995628   | 0.2185153   | 0.04894299  | 0          |                         |
| 0.2081975   | 0.047347724 | 0.04469052  | 0.02650759  | 0.01531394  | 0.05646668  |            |                         |
| 0.011724482 | 0.07806086  | 0.1031253   | 0.1627332   | 0.03443587  | 0.1780279   |            |                         |
| 0.08276189  | 0.03336027  | 0.2068929   | 0.08287078  | 0.07897659  | 0.04810736  |            |                         |
| 0.09637168  | 1.1240120   | 0.03986783  | 0.09486871  | 0.03832954  | 0.03270276  | 0          |                         |
| 0.05917445  | 0.081267428 | 0.1136173   | 0.2292883   | 0.057770726 | 0.05190362  |            |                         |
| 0.07874292  | 0.08322859  | 0.05233278  | 0.09319087  | 0.1249752   | 0.112093232 |            |                         |
| 0.1255340   | 0.1617221   | 0.1196322   | 0.1864442   | 0.1481609   | 0.1299624   |            |                         |
| 0.1265280   | 0.06719844  | 0.117421906 | 0.09106877  | 0.1963410   | 0.07579752  |            |                         |
| 0.01234285  | 0.2581078   | 0.0466423   | 0.1808264   | 0.08281227  | 0.06947271  |            |                         |
| 0.1298468   | 0.07059503  | 0.08508911  | 0.08638405  | 0.07276077  | 0.04911494  |            |                         |
| 0.02633928  | 0.02941626  | 0.4664933   | 0.069565975 | 0.2135507   | 0.03487535  |            |                         |
| 0.06992229  | 0.05193001  | 0.02111633  | 0.2337079   | 0.097530951 | 0.02622075  |            |                         |

|             |             |             |             |             |             |
|-------------|-------------|-------------|-------------|-------------|-------------|
| 0.02129091  | 0.03187251  | 0.04876921  | 0.079598483 | 0.05908259  | 0.1112564   |
| 0.1001568   | 0.1333245   | 0.09635348  | 0.2739783   | 0.08470204  | 0.1322448   |
| 0.1253536   | 0.1463341   | 0.2059935   | 0.09816508  | 0.1109453   | 0.139422629 |
| 0.061358169 | 0.2300497   | 0.107466298 | 0.040732674 | 0.0776403   | 0.031274132 |
| 0.1469753   | 0.1436912   | 0.10769     | 0.119569906 | 0.2027801   | 0.1132843   |
| 0.08408525  | 0.198224634 | 0.06506872  | 0.08991573  | 0.1109546   | 0.08629328  |
| 0.1202489   | 0.4800621   | 0.1158804   | 0.4023384   | 0.08226999  | 0.07486243  |
| 0.1528174   | 0.126193575 | 0.04439057  | 0.159063195 | 0.1182350   | 0.1637253   |
| 0.1343077   | 0.1162755   | 0.1748418   | 0.1011697   | 0.3073256   | 0.03227125  |
| 0.2590395   | 0.116993057 | 0.2748069   | 0.2004826   | 0.07404801  | 0.08715033  |
| 0.06508826  | 0.0458797   | 0.1994982   | 0.2101425   | 0.03094802  | 0.1922395   |
| 0.0439735   | 0.08051018  | 0           | 0.07188536  | 0.143385834 | 0.1061410   |
| 0.04677643  | 0.06821436  | 0.1622745   | 0.03624032  | 0.07104309  | 0.1091119   |
| 0.2415026   | 0.1180764   | 0.167326115 | 0.048047236 | 0.0959430   | 0.1298274   |
| 0.03575005  | 0.1640534   | 0.02917282  | 0.06890758  | 0.02386926  | 0.03974017  |
| 0.2424340   | 0.09176796  | 0.3956374   | 0.08726021  | 0.09892442  | 0.1394270   |
| 0.01421917  | 0.09302191  | 0.06074944  | 0.065357109 | 0.1764241   | 0.06697004  |
| 0.07118203  | 0.02975611  | 0.04011865  | 0.03298401  | 0.3049450   | 0.02969538  |
| 0.1807827   | 0.08109544  | 0.3457874   | 0.054141045 | 0.04861905  | 0.1377559   |
| 0.08214452  | 0.01755397  | 0.0329073   | 0.056644496 | 0.06968259  | 0.05643612  |
| 0.1114153   | 0.06555871  | 0.0522456   | 0.1336795   | 0.006006092 | 0.06793174  |
| 0.4603202   | 0.06051934  | 0.1488287   | 0.088948601 | 0.1693235   | 0.02872466  |
| 0.03310114  | 0.075532032 | 0.072925929 | 0.04345578  | 0.1406097   | 0.02664118  |
| 0.11111058  | 0.08558963  | 0.02442942  | 0.1149946   | 0.06023397  | 0.05579413  |
| 0.09167788  | 0.02946846  | 0.0859674   | 0.071082831 | 0.01393406  | 1.981276    |
| 0.07973127  | 0.1503184   | 0.08613036  | 0.1339914   | 0.3004231   | 0.03501584  |
| 0.1487226   | 0.1321337   | 0.08910253  | 0.02967453  | 0.05018714  | 0.06105318  |
| 0.2213878   | 0.04301426  | 0.09787586  | 0.0342647   | 0.08855474  | 0.1185912   |
| 0.04797984  | 0.1112579   | 0.01604336  | 0.04691072  | 0.0289650   | 0.1046757   |
| 0.1333167   | 0.07062037  | 0.03327394  | 0.09788626  | 0.1306836   | 0.1519999   |
| 0.3436195   | 0.09100642  | 0.04384475  | 0.08360617  | 0.1697840   | 0.2567812   |
| 0.0730318   | 0.01727813  | 0.0885576   | 0.01813461  | 0.03965924  | 0.1309569   |
| 0.05350964  | 0.2586914   | 0.1011021   | 0.087540947 | 0.02233198  | 0.05676623  |
| 0.2916921   | 0.01951175  | 0.06275179  | 0.045420983 | 0.065934663 | 0.006932339 |
| 0.047641806 | 0.05017528  | 0.2634071   | 0           | 0.08723009  | 0.07160948  |
| 0.09536984  | 0.04430057  | 0.04941319  | 0.07251607  | 0.1002273   | 0.070410273 |
| 0.01683366  | 0.1543504   | 0.08161026  | 0.009937307 | 0.0386190   | 0.1582941   |
| 0.05610213  | 0.2079260   | 0.07379034  | 0.2675653   |             |             |
| AC106820.5  | 0.03368939  | 0           | 0.03897404  | 0.14401438  | 0           |
| 0.05285733  | 0.02977035  | 0.01463466  | 0.06403715  | 0.028699342 | 0.1368743   |
| 0.123670449 | 0.08155501  | 0.1323726   | 0           | 0           | 0.01632412  |
| 0.1060307   | 0.1650279   | 0.04574456  | 0.1307955   | 0.08922095  | 0.1926114   |
| 0.3111257   | 0           | 0.1063176   | 0.319494676 | 0.01976585  | 0.4878911   |
| 0.073336629 | 0.04585526  | 0.03374707  | 0.5215034   | 0.4648423   | 0.1115815   |

|             |             |             |             |             |             |
|-------------|-------------|-------------|-------------|-------------|-------------|
| 0.06636092  | 0.2009998   | 0.09696928  | 0.06557522  | 0.4086076   | 0.04229251  |
| 0.1604423   | 0.1206399   | 0           | 0.09428161  | 0.1713160   | 0.0901891   |
| 0.02657639  | 1.1829520   | 0.2265510   | 0.05211571  | 0.05426336  | 0.05463611  |
| 0.04920482  | 0.4394634   | 0.05828775  | 0.1872754   | 0.092295281 | 0.08467365  |
| 0.1713761   | 0.1729650   | 0.050638179 | 0.02589746  | 0.05952868  | 0.3519440   |
| 0.3125223   | 0.02900101  | 0.3335307   | 0.2017276   | 0.1659076   | 0.03208796  |
| 0.1800776   | 0.08340307  | 0           | 0.1573582   | 0.098147017 | 0.07992217  |
| 0.1269497   | 0.07802443  | 0.4496442   | 0.2095344   | 0.091590475 | 0.4398644   |
| 0.1211606   | 0.3592813   | 0.164623579 | 0.3345945   | 0.1129416   | 0.03514046  |
| 0.02494998  | 0.1385491   | 0.0209856   | 0.3378958   | 0.1716219   | 0.07667231  |
| 0.2424335   | 0.055648902 | 2.0024990   | 0.067850377 | 0           | 0.2116781   |
| 0.06917437  | 0.8094559   | 0.03263904  | 0.02649453  | 0.02746825  | 0.4910555   |
| 0.02123367  | 0.02878575  | 0.1188368   | 0.0767978   | 0.0781649   | 0.4005018   |
| 0.2746462   | 0.0776263   | 0           | 0.0825532   | 0.245313999 | 0.04961715  |
| 0.1133476   | 0.04643816  | 0           | 0.06666631  | 0.05871474  | 0.04301733  |
| 0.2280618   | 0.03828561  | 0.3174674   | 0           | 0.0484244   | 0.09742542  |
| 0.1698343   | 0.6932898   | 0           | 0.02507784  | 0           | 0.1383157   |
| 0.2463667   | 0.150377102 | 0.3057997   | 0.07955151  | 0.085519077 | 0.09604236  |
| 0.7285288   | 0           | 0.09683648  | 0.2586603   | 0.1027795   | 0.092185383 |
| 0.05700006  | 0.2361250   | 0.1379984   | 0.04984668  | 0.2519338   | 0.09365086  |
| 0.02365525  | 0.0765193   | 0.031039612 | 0.0674054   | 0.1453236   | 0.2618104   |
| 0.1370352   | 0.06703189  | 0.2157671   | 0.2453740   | 0.1285522   | 0.07587419  |
| 0.06531446  | 0.1845951   | 0.04918304  | 0.08078183  | 0.1009802   | 0.0974763   |
| 0.05443179  | 0.2926096   | 0.070213502 | 0.13626     | 1.18311     | 0.08625605  |
| 0.2344417   | 0.1179417   | 0.106159468 | 0.5094478   | 0.05252888  | 0.06740209  |
| 0.1443879   | 0           | 0.1020379   | 0.1583605   | 0.05295144  | 0.1938384   |
| 0.3041814   | 0.09645077  | 0.06439621  | 0.1449713   | 0.03610351  | 0.2541133   |
| 0.05449335  | 0           | 0.079380732 | 0.087336188 | 0.3701596   | 0.350921368 |
| 0.04788849  | 0.086804395 | 0.1655426   | 0.06647148  | 0.2536157   | 0.059000517 |
| 0.1705563   | 0.05716938  | 0.0777956   | 0.15947587  | 0.04013435  | 0.04159497  |
| 0.3193713   | 0.08709651  | 0.2396243   | 0.9129812   | 0.1906      | 0.2905312   |
| 0.1292903   | 0.2661393   | 0.049159655 | 0.1642805   | 0.070639259 | 0.1514644   |
| 0.1753961   | 0.06855799  | 0           | 0.2647039   | 0.1040024   | 0.1229567   |
| 0.07988769  | 0.086593496 | 0.08136034  | 0.5045227   | 0.3288439   | 0.3225256   |
| 0.1605856   | 0.02122393  | 0.2187563   | 0.07776947  | 0.06544703  | 0.2561182   |
| 0.1084913   | 0.04965863  | 0           | 0.02418482  | 0.040818598 | 0.2455038   |
| 0.1081938   | 0.06311186  | 0.8579211   | 0.1072944   | 0.04780291  | 0.1284822   |
| 0.9479188   | 0.2731103   | 0.190535347 | 0           | 0.2564362   | 0.08735723  |
| 0.4857025   | 0.02699067  | 0.02318299  | 0.07571596  | 0           | 0.1212431   |
| 0           | 0.08498218  | 0.3660991   | 0.1407248   | 0.05136689  | 0           |
| 0.1573749   | 0.175907891 | 0.3031366   | 0.0991370   | 0.03292878  | 0.02753033  |
| 0.08908258  | 0.07324026  | 1.0943410   | 0.3663219   | 0.5435949   | 0.09003531  |
| 0.4209502   | 0.145719987 | 0           | 0.1176477   | 0.1381819   | 0.06496367  |
| 0.258005839 | 0.03033895  | 0.06961953  | 0.2249047   | 0.03032743  | 0.05273191  |

|            |             |                   |             |                   |                   |                   |             |                   |             |   |
|------------|-------------|-------------------|-------------|-------------------|-------------------|-------------------|-------------|-------------------|-------------|---|
|            | 0.2826975   | 0                 | 0.1047506   | 0.22547           | 0.2239697         | 0.1335235         | 0.018287814 |                   |             |   |
|            | 0.1105821   | 0.03543471        | 0           | 0.279528668       | 0.343488742       | 0.1237085         | 0.130092    |                   |             |   |
|            | 0.02464839  | 0.02569876        | 0.05279163  | 0.04520415        | 0.2127857         | 0.1337482         |             |                   |             |   |
|            | 0.1445379   | 0.02827343        | 0.06231814  | 0.2120986         | 0.060706865       | 0.07735066        |             |                   |             |   |
|            | 0.40988     | 0.02950692        | 0.1076705   | 0.2276792         | 0.02253977        | 0.1655880.1666112 |             |                   |             |   |
|            | 0.07338561  | 0.1833750.0206094 | 0.1537471   | 0.6922753         | 0.09037816        |                   |             |                   |             |   |
|            | 0.4855177   | 0.1013008         | 0.2478338   | 0.0951050.1008379 | 0.2057259         |                   |             |                   |             |   |
|            | 0.05918787  | 0.2264586         | 0.1187464   | 0                 | 0.1339920.1019431 | 0.06167225        | 0           |                   |             |   |
|            | 0.08209339  | 0.1906616         | 0.08411017  | 0.08881906        | 0.05449996        | 0.1262986         |             |                   |             |   |
|            | 0.01802894  | 0                 | 0.09921093  | 0.2436654         | 0.2494854         | 0.03197143        | 0.7022863   |                   |             |   |
|            | 0.1118542   | 0.1834635         | 0.2550761   | 0.02828975        | 0.07364339        | 0.08803725        | 0           |                   |             |   |
|            | 0.04958767  | 0.1633958         | 0.3925430   | 0.07145587        | 0.084046905       | 0.044365593       |             |                   |             |   |
|            | 0.07696552  | 0.146927185       | 0.03094808  | 0.02707823        | 0.4186018         | 0.3961892         |             |                   |             |   |
|            | 0.06625302  | 0.07406199        | 0.2076143   | 0.06557896        | 0.06857556        | 0                 | 0.08727547  |                   |             |   |
|            | 0.040088321 | 0.2180429         | 0.1038581   | 0.3020230         | 0.08932565        | 0.2267668         |             |                   |             |   |
|            | 0.2595282   | 0.1737562         | 0.0273083   | 0.1494648         |                   |                   |             |                   |             |   |
| AC063919.1 | 0           | 0.3594913         | 0.06743736  | 0                 | 0.061559425       | 0.1809160.1906157 |             |                   |             |   |
|            | 0.2743795   | 0.4120967         | 0.2025806   | 0                 | 0                 | 0.2960445         | 0.501407401 |                   |             |   |
|            | 0.534972071 | 0.2822317         | 0.3664741   | 0                 | 0.5178458         | 0.2824588         | 0.123750218 |                   |             |   |
|            | 22.134260   | 0.06345562        | 0           | 0                 | 0.2470086         | 0.06059607        | 2.1533820   |                   |             |   |
|            | 0.0735852   | 0                 | 0           | 0                 | 0.063447733       | 0.07934405        | 0           | 0.3007884         |             |   |
|            | 0.4021618   | 0                 | 0           | 0                 | 0.1134658         | 0.6284620.1463587 | 0           | 0.05964143        |             |   |
|            | 0           | 0                 | 0.5928613   | 0.2080741         | 0                 | 0                 | 0.07724071  | 0.1742242         | 0           | 0 |
|            | 0           | 0.08513983        | 0.09505127  | 0                 | 0                 | 0.212933207       | 0           | 0.1317931         | 0           | 0 |
|            | 0           | 0.35822           | 0           | 0.3785334         | 0                 | 0.08878663        | 0.09972921  | 0                 | 0.1110446   | 0 |
|            | 0.1443136   | 0                 | 0           | 0                 | 0                 | 0                 | 0.1800091   | 2.0006380.1450242 |             |   |
|            | 0.443745034 | 0.1323659         | 0.05241151  | 0.0828893         | 0                 | 0.2315815         | 0           | 0                 | 0           |   |
|            | 0           | 0.2178702         | 0.2126059   | 0.1696914         | 0.1326672         | 0.07627025        | 0           |                   |             |   |
|            | 21.367210   | 0                 | 0.1046485   | 0.4144176         | 0.1196934         | 0                 | 0.2259032   | 0                 | 0           |   |
|            | 0.08092196  | 0                 | 0           | 0                 | 0.08858958        | 0.1803332         | 0           | 0.2112109         | 0.1790906   |   |
|            | 0           | 0.0952287         | 0.848940966 | 0.1717066         | 0.0678970         | 0.08035264        | 0.150156458 |                   |             |   |
|            | 0           | 0.20319           | 0           | 0.07350387        | 0                 | 0                 | 0.3662124   | 0                 | 0.05585964  | 0 |
|            | 0.08801644  | 0                 | 0           | 0                 | 0                 | 0.05983244        | 0.0880324   | 0.3789262         | 0           | 0 |
|            | 0.1835322   | 1.701711783       | 0           | 0                 | 0.4441315         | 0.0837788         | 0.3978345   | 0                 | 0           |   |
|            | 0.1004828   | 0                 | 0.1021427   | 0.1790855         | 0.2587514         | 0.07925905        | 0.06481819  |                   |             |   |
|            | 0           | 0                 | 0           | 0.1166326         | 0.2011645         | 0                 | 0           | 0.1739794         | 0           | 0 |
|            | 0           | 0.1503095         | 0           | 0                 | 0.1397821         | 0                 | 0.09418413  | 0                 | 0.080994315 |   |
|            | 0.09430906  | 0.07444194        | 0           | 0                 | 0.2704386         | 0.1360508         | 0           | 0                 | 0.0908915   |   |
|            | 0           |                   |             |                   |                   |                   |             |                   |             |   |

|             |             |             |             |             |              |             |             |             |            |           |           |
|-------------|-------------|-------------|-------------|-------------|--------------|-------------|-------------|-------------|------------|-----------|-----------|
| 0.06946591  | 0.1468963   | 0.2838879   | 0.2691313   | 0.05662199  | 0            | 0           |             |             |            |           |           |
| 0.08592507  | 0           | 0           | 0           | 0.1699196   | 0            | 0.07488373  | 0           | 0           | 0.09282659 | 0         |           |
| 0           | 0.1874512   | 0           | 0           | 0.102557519 | 0.0682639    | 0.1511555   | 0.09157079  | 0           |            |           |           |
| 0           | 0           | 0.2183541   | 0.08482596  | 0           | 0            | 0           | 0.2352735   | 0           | 0          | 0.1777618 |           |
| 0           | 0.5643188   | 0           | 0           | 0.2420870   | 0.05697715   | 0           | 0           | 0           | 19.645630  | 0         |           |
| 0           | 0.4078908   | 0           | 0.1779052   | 0           | 0            | 0.0749384   | 0           | 0.111607841 | 0          | 0         |           |
| 0.5837338   | 0           | 0.1216571   | 0.1222889   | 0.076920536 | 0            | 0.3467860   |             |             |            |           |           |
| 0.1155189   | 0           | 0           | 0.1226264   | 0           | 11.070729225 | 0           | 0           | 0           | 0          | 0         | 0         |
| 0           | 0.1840932   | 0           | 0.1429120   | 0.09784388  | 0            | 0           | 0.140055996 | 0           | 0          |           |           |
| 0.1021125   | 0.1863039   | 0           | 0.1560036   | 0.08186266  | 0            | 0.1269802   | 0           |             |            |           |           |
| 0.1426430   | 0           | 0           | 0           | 0.05008067  | 0.06597393   | 0.1097077   | 0.1744813   |             |            |           |           |
| 0.04746274  | 0           | 0           | 0           | 0           | 0            | 0.5335621   | 0.2009869   | 0           | 0.1979428  |           |           |
| 0.2183056   | 0           | 0           | 0.07284545  | 0.0623915   | 0.4758895    | 0.1144441   |             |             |            |           |           |
| 0.08432358  | 0           | 0           | 0.1620235   | 0.07741718  | 0            | 0.2648172   | 0.09790036  | 0           |            |           |           |
| 0.07616608  | 0           | 0           | 0           | 0.08490287  | 0            | 0.06182058  | 0           | 0.153532898 | 0          | 0         |           |
| 0           | 0.9370772   | 0           | 0.05078015  | 0.1146386   | 0.1708674    | 0           | 0           | 0.3559720   |            |           |           |
| 0.1510141   | 0           | 0           | 0.0898536   | 0           | 0            | 0.1236492   | 0           | 0.0598754   |            |           |           |
| 0.08590086  | 0.09450392  | 0.1293106   |             |             |              |             |             |             |            |           |           |
| AL596223.1  | 0.0153197   | 0           | 0           | 0           | 0.016178059  | 0           | 0           | 0           | 0          | 0         | 0.4513576 |
| 0           | 0           | 0.032942959 | 0           | 0           | 0            | 0           | 0.01484625  | 0           | 0.01328076 |           |           |
| 0.02410787  | 0.7087464   | 0           | 0.009912849 | 0           | 0.01592488   | 0.02572351  |             |             |            |           |           |
| 0.042507061 | 0           | 0           | 0           | 0.1210148   | 0.03874565   | 0           | 0.01042596  | 0           |            |           |           |
| 0.01976209  | 0.7398279   | 0           | 0           | 0.07312108  | 0            | 0           | 0.03096793  | 0           | 0          | 0         |           |
| 0           | 0           | 0.006491928 | 0.06835335  | 0           | 0.02417035   | 0           | 0.0114467   | 0.007899588 |            |           |           |
| 0.01645025  | 0           | 0           | 0.03356262  | 0.1498791   | 0            | 0.06082888  | 0.041969763 | 0           |            |           |           |
| 0.01731788  | 0.01123614  | 0.046053761 | 0.01177645  | 0.02706969  | 0            | 3.344323928 |             |             |            |           |           |
| 0.04974003  | 0           | 0           | 0.01310461  | 0           | 0            | 0.07585235  | 0.6817346   | 0           | 0          |           |           |
| 0.1235672   | 0.2396036   | 0           | 0           | 0           | 0            | 0.0869657   | 0           | 0.01089182  | 0          |           |           |
| 0.01521513  | 0           | 0           | 0           | 0           | 0.01396842   | 0           | 0.0261491   | 0.02004412  |            |           |           |
| 0.008435141 | 0.1011782   | 0           | 0.0336682   | 0.02750205  | 0.009075881  | 0.01572795  |             |             |            |           |           |
| 0           | 0           | 0           | 0.0374722   | 0.0106333   | 0.009655665  | 0           | 0.01801303  | 0           |            |           |           |
| 0.01184807  | 0           | 0.00693838  | 0           | 0.02150663  | 0            | 0.015936073 | 0.01504172  |             |            |           |           |
| 0.008921799 | 0.1718098   | 0.05279247  | 0.019730854 | 0           | 0            | 0.01956142  |             |             |            |           |           |
| 0.06760987  | 0           | 0           | 0           | 0.06963502  | 0            | 0.02215131  | 0           | 0.01544587  |            |           |           |
| 18.004970   | 0           | 0           | 0.0157242   | 0           | 0.01244791   | 0.013676303 | 0           | 0           |            |           |           |
| 0.262496669 | 0           | 0           | 0           | 0.0220174   | 0            | 0.07010594  | 0.136239314 | 0           | 0          | 0         |           |
| 0.01568813  | 0.02266696  | 0.05207398  | 1.7417750   | 0.2151367   | 0            | 0.056459014 | 0           |             |            |           |           |
| 0.02643341  | 0.008503857 | 0.04154299  | 0           | 0.009811653 | 0.02028724   | 0           |             |             |            |           |           |
| 0.02922849  | 0.05750423  | 0           | 0.02962644  | 0.01118259  | 0            | 0.01836764  |             |             |            |           |           |
| 0.01477525  | 0.04950392  | 0           | 0.319284367 | 0           | 0.009781817  | 0.05229803  | 0           | 0           |            |           |           |
| 1.3408010   | 0           | 0.01194332  | 0.06896249  | 1.3952330   | 0            | 0.01440237  |             |             |            |           |           |
| 0.0120394   | 0.03205267  | 0           | 0           | 0.2631564   | 0            | 0.01318467  | 0           | 0.03851795  |            |           |           |
| 0.008259985 | 0.02333839  | 0           | 0.071486454 | 0.1009944   | 0.010638382  | 0.034274027 |             |             |            |           |           |
| 0           | 0           | 0           | 0.01511341  | 0.008237683 | 1.462208613  | 0.01551154  | 0           | 0.008844068 |            |           |           |

|             |             |             |             |             |             |             |             |             |   |             |
|-------------|-------------|-------------|-------------|-------------|-------------|-------------|-------------|-------------|---|-------------|
| 0           | 0.0547513   | 0           | 0           | 0.0132019   | 0           | 0.01122063  | 0.02166805  | 0           | 0 | 0           |
| 0           | 0           | 0.05602788  | 0.021414695 | 0           | 0           | 0.01558781  | 0           | 0.01337442  |   |             |
| 0.009458675 | 0           | 0.02172341  | 0           | 0.019688485 | 0           | 0           | 9.4644060   | 0.0183329   | 0 |             |
| 0           | 0           | 0           | 0.02976096  | 0           | 0.03700098  | 0           | 0           | 0           | 0 | 0           |
| 0.0502234   | 0           | 0           | 0.01086879  | 0.00834645  | 0.03694718  | 0           | 0           | 0.30995397  |   |             |
| 0           | 0           | 0           | 0.0883461   | 0           | 0           | 0.005738432 | 0.03343889  | 0.01102666  | 0 | 0           |
| 0.0154577   | 0.03963752  | 0           | 0.005839562 | 0           | 0           | 0           | 0           | 0.01060357  | 0 |             |
| 0.02246073  | 0           | 0.02700589  | 0           | 0           | 0           | 0.009507341 | 0           | 0.01531362  | 0 |             |
| 0.03506565  | 0           | 0.02513438  | 0.009847054 | 0           | 0.029330979 | 0           | 0.01582917  | 0           |   |             |
| 0.1103272   | 0.06394392  | 0           | 0           | 0           | 0.01139209  | 0.02036931  | 0.007589705 |             |   |             |
| 0.074844749 | 0.03352359  | 0           | 0           | 0.014123452 | 0.022313695 | 0.02250176  |             |             |   |             |
| 0.6433344   | 0.0224169   | 0           | 0.02400613  | 0.3083377   | 0           | 0           | 0.02816838  | 0           |   |             |
| 1.5798520   | 0.009644833 | 0           | 0           | 0.02070958  | 0.01341779  | 0           | 0.6833204   |             |   |             |
| 0.03074877  | 0.02151383  | 0.008418189 | 0           | 0           | 0.01874357  | 0           | 0           | 0           |   |             |
| 0.02759765  | 0.04606489  | 0.01733821  | 0.08649487  | 0.04585436  | 0           | 0           | 0           | 0           | 0 |             |
| 0           | 0           | 0           | 0.01402222  | 0.05282016  | 0.09332655  | 0.008670025 | 0           | 0           | 0 | 0           |
| 0           | 0           | 0.01503818  | 0           | 0.009454115 | 0.3925390   | 13.916350   | 0.5255901   |             |   |             |
| 0.01159917  | 0.0771858   | 0           | 0.1100921   | 0           | 0.1503278   | 0.02122901  | 0           | 0           |   |             |
| 0           | 0.152875798 | 0.020174525 | 0           | 0.02672509  | 0.08443879  | 0.01231338  |             |             |   |             |
| 23.603690   | 0           | 0.01122616  | 0.03776368  | 0           | 0           | 0           | 0.009921772 | 0.072918021 |   |             |
| 0.07082243  | 0.04722776  | 0           | 0.01672326  | 0.02437162  | 0.1117117   | 0.06294197  |             |             |   |             |
| 0           | 0.08692601  | 0.008495835 |             |             |             |             |             |             |   |             |
| AL117329.1  | 0           | 0           | 0.1806231   | 0           | 0           | 0.01009505  | 0           | 0           | 0 | 0.005651963 |
| 0.0123657   | 0.166256951 | 0.006607672 | 0           | 0           | 0           | 0           | 0.01250298  | 0           | 0 |             |
| 0.220966997 | 0.5978033   | 0           | 0.2407745   | 0.5123351   | 0.2020549   | 0.2549853   |             |             |   |             |
| 0.02028743  | 0.2075456   | 0           | 0           | 0           | 0           | 0.3948788   | 0.127453004 | 0           |   |             |
| 0.1563990   | 0           | 0           | 0.4015185   | 0.4191852   | 0.4962113   | 0.06331351  |             |             |   |             |
| 1.2098450   | 0.3838380   | 0.3098171   | 0.5590991   | 0.5733961   | 0.3823252   | 0           |             |             |   |             |
| 0.02322092  | 0.01726585  | 0           | 0.8361408   | 0.2041547   | 0.3488730   | 0.4191344   |             |             |   |             |
| 0.01055034  | 0.8282571   | 0           | 0.4243062   | 0           | 0.3513001   | 0.118815981 |             |             |   |             |
| 0.08720345  | 0           | 0           | 0.0100017   | 0.2069119   | 0.5996565   | 0.07647027  |             |             |   |             |
| 0.5672774   | 0           | 0.7926820   | 0.3895398   | 0.8970382   | 0           | 0.3278628   | 0           | 0           | 0 |             |
| 0.050539677 | 0.1790243   | 0           | 0.4003993   | 0           | 0.6884154   | 0.9144297   |             |             |   |             |
| 0.594259606 | 0           | 0           | 0.015894566 | 0.4005872   | 0.1962831   | 0.9499967   |             |             |   |             |
| 0.2119871   | 0.3745575   | 0.1945133   | 0.09490667  | 1.0131530   | 0.1617224   | 0           |             |             |   |             |
| 16.090450   | 0           | 0           | 0.2004111   | 0.2805118   | 1.2113830   | 0.3277384   | 0.2353427   |             |   |             |
| 0.1697335   | 0.4876650   | 0.1886121   | 0.8337877   | 0.1376857   | 0           | 0.6037517   |             |             |   |             |
| 0.4083429   | 0.6128455   | 0.04996596  | 0           | 0.4038433   | 0           | 0.1213615   |             |             |   |             |
| 0.03788629  | 0.06566291  | 0           | 0.251360327 | 0           | 0.3968275   | 0           | 0.2296834   |             |   |             |
| 0.2055161   | 0.8280189   | 0.2724603   | 0           | 0.01246779  | 0.009406519 | 0.2848546   |             |             |   |             |
| 0.2033314   | 0.8195220   | 0.009496927 | 0.09685159  | 0           | 0.3672492   | 0           | 0.01057197  | 0           |   |             |
| 0.3690657   | 0           | 0.107340344 | 0           | 0.5439639   | 0.9813824   | 0           | 0.02219903  | 0           |   |             |
| 0           | 0.3588420   | 0.4512797   | 0.2963752   | 0           | 0.2406372   | 0.1326788   | 0           |             |   |             |
| 0.3745657   | 0.1108202   | 0.011987618 | 0           | 0.2693978   | 0.3972265   | 0.008820585 |             |             |   |             |

|             |             |             |             |             |             |             |             |           |
|-------------|-------------|-------------|-------------|-------------|-------------|-------------|-------------|-----------|
| 0           | 0.04999805  | 0           | 0           | 0.08274558  | 0.4493112   | 0           | 0.4696841   | 0.2374335 |
| 0.4575744   | 0           | 0           | 0           | 0.4068251   | 0.280206168 | 0.7156881   | 0.1163074   |           |
| 0.1998745   | 0           | 0.3018076   | 0.9185821   | 0.008199839 | 0           | 0.01014343  | 0           |           |
| 0.2648751   | 0           | 0.1463705   | 0.4403480   | 0.01022503  | 0.2994446   | 0.008607147 |             |           |
| 0.7048562   | 0.2514352   | 0           | 0.4815010   | 0.5779328   | 0           | 0           | 0.215869269 |           |
| 0.01429571  | 0           | 0           | 0.3236576   | 0           | 0.01826663  | 0.4620878   | 0.2798496   |           |
| 0.47851078  | 1.0275650   | 0           | 0           | 0           | 0.03212828  | 0.008810173 | 0           | 0         |
| 1.8582810   | 0.3680522   | 0.8836088   | 0           | 0.05706561  | 0           | 0.465148398 | 0           | 0         |
| 0.1819880   | 0.1908999   | 0.8340369   | 0.04748231  | 0.7383254   | 0.01606645  |             |             |           |
| 0.8310111   | 0.03689926  | 0.01028431  | 0.200656457 | 0.8169637   | 0.2865421   |             |             |           |
| 0.0052917   | 0.1712709   | 0.2015610   | 0.01056056  | 0           | 0.09478461  | 0           |             |           |
| 0.01047494  | 0.06712424  | 0           | 0.009340273 | 0           | 0.4803936   | 0.4639736   |             |           |
| 0.1253546   | 0           | 0.7178870   | 0.4338492   | 0.4394941   | 0.5752841   | 0           |             |           |
| 0.47830567  | 0           | 0           | 0.2699016   | 0.07153465  | 0.3939184   | 0.3127170   | 0           | 0         |
| 3.66168     | 0.2623209   | 0.7847331   | 0           | 0           | 0.2898585   | 0.03471666  | 0           |           |
| 0.04198505  | 0.1215576   | 0           | 0.009005578 | 0           | 0           | 0.4890867   | 0           | 0         |
| 3.9226170   | 0.3395398   | 0           | 0.01159066  | 0.9884415   | 0.281388111 | 0           | 0           | 0         |
| 0.009406628 | 0           | 0.3339351   | 0.5579122   | 0.6152516   | 0.05856285  | 0.2443832   |             |           |
| 0.4094208   | 0           | 0.3074588   | 0.4547376   | 0.5708867   | 0.1160264   | 0.014125649 |             |           |
| 0.3416578   | 0           | 0           | 0.13265668  | 0.2197728   | 0.7347895   | 0.05711583  |             |           |
| 0.05954976  | 0           | 0           | 0.5855230   | 0.1721802   | 0.4226454   | 0.2183862   | 0.2406751   |           |
| 0           | 0.171931658 | 0.009957708 | 15.038240   | 0.1595396   | 0.6098806   | 0.2813779   |             |           |
| 0.01740989  | 0.3106177   | 0.07864497  | 0           | 0.6373810   | 0.1442031   | 0.2673594   |             |           |
| 0.5410181   | 0           | 0           | 0.3018684   | 0           | 0.009735993 | 0.2171692   | 0.2171566   |           |
| 0.2623776   | 0           | 0.2298779   | 0.02069929  | 0.2283507   | 0           | 0.5943951   |             |           |
| 0.2536383   | 0           | 0.5603434   | 0           | 0.5332184   | 0.2276260   | 0.02655447  | 0           | 0         |
| 0.3854089   | 0           | 0.4972471   | 0.2937499   | 0.4747238   | 1.8421630   | 0.3496196   |             |           |
| 0.009480454 | 0.2465024   | 0.06951052  | 0.0510692   | 0.3335501   | 0.7295828   | 0           |             |           |
| 0.1034870   | 0.210985058 | 0.008567082 | 0           | 0           | 0.3705203   | 1.1294330   | 0.4849970   | 0         |
| 0.02860303  | 0.04009073  | 0.0506537   | 0           | 0.1753983   | 0.008426531 | 0.185787173 |             |           |
| 0.3368360   | 0.4453620   | 0.4277741   | 0           | 0.01336411  | 0.7956775   | 0.3269437   |             |           |
| 0.8802895   |             |             |             |             |             |             |             |           |
| AC015849.3  | 0.7281879   | 0.1871123   | 0.5967101   | 0.194552213 | 0.288370587 |             |             |           |
| 0.9887354   | 0.4960697   | 0.7616654   | 0.5898557   | 0.4217661   | 1.384147    |             |             |           |
| 0.87879972  | 2.6195090   | 0.695942513 | 0.501207441 | 2.4972881   | 1.4782871   | 1.166262    |             |           |
| 0.1010754   | 2.1464550   | 0.515287793 | 1.3151493   | 0.02394     | 1.42021     | 3.1310652   | 2.23813     |           |
| 0.8356785   | 5.2986791   | 1.22271     | 0.378839829 | 1.3022177   | 0.737052413 | 0.4628367   |             |           |
| 1.4380432   | 1.1486372   | 0.014465539 | 3.6342182   | 1.275184    | 0.5401790   | 0.7326267   | 0.5024598   |           |
| 0.3984375   | 2.0998715   | 0.2835841   | 0.6536246   | 0.74663     | 0.4570711   | 0.8188145   |             |           |
| 1.4590150   | 0.9657129   | 0.7217469   | 1.2343181   | 0.6786631   | 1.248165296 | 1.005274    |             |           |
| 2.2513771   | 1.5415990   | 0.8135604   | 2.0525560   | 0.6888852   | 2.1070561   | 0.63964     | 3.957872    |           |
| 0.8399169   | 0.2891366   | 1.108299888 | 0.1525167   | 4.3559251   | 0.8692980   | 0.820898846 |             |           |
| 1.6793021   | 1.3939232   | 0.8340491   | 1.222807973 | 1.8013580   | 0.1567124   | 0.7394034   |             |           |
| 6.3847132   | 0.0918640   | 0.4045845   | 1.71448     | 0.6009123   | 0           | 1.2110540   | 0.353570607 |           |

0.4894578 2.1947612.8202090.5621596 0.2892544 1.3964520.758887145  
0.8267444 0.4364762 4.5300362.298067569 2.2299210 1.7722891.797625  
1.6533270.8693974 1.7705542.7821740.6559960.7542628 1.369898063  
16.231320.977712807 0.2667239 6.1549630.6830531.3082893.2805360.5879039  
0.5249501 0.5442427 0.8423844 1.3386350.8295962.0691731.936626  
2.5812043.2318523.6278060.6058987 0.08518919 1.0904471.388724273 0.47665  
1.3429140.4763851.5474470.390776027 1.4810031.4277430.8523249 0.7651632  
1.3693053.3101360.4765264 0.8826525 1.1629790.6580708 0.6413657  
0.3670926 18.523481.8160150.4065385 0.5748842 0.7785573 0.5040215  
0.6902979 1.137627425 0.6885193 1.4329050.654667808 1.1244630.524899  
0.6472671 1.6570351.7600922.0364240.539652856 0.7845074 1.745393  
1.1696173.8217140.5387119 1.6088942.1423210.08521707 0.7236013  
0.782732502 2.0033080.3141134 1.3473731.0284662.98831 0.3497814  
4.2992112.1528981.4664961.1844460.4705853 1.8580780.08858995 0.4365199  
0.8730650.4096801 0.09804414 6.7463310.632353157 2.35618 1.123646  
0.2071559 2.6539280.8445666 1.6287070.267704592 1.3546 0.8515491  
0.5766815 1.7555120.707469578 1.0765061.4832673.4335971.6505153.29174  
6.0877831.0858121.2759163.6035470.7153377 3.7634451.7013541.016894  
3.789047285 1.352887656 2.3335981.011343877 0.181015557 0.6469362  
1.459309945 0.8945407 1.0775744.07875 0.478230622 2.21192 1.270027  
2.8375860.86175793 2.0241530.6742988 0.8628915 0.9412848 1.973113  
3.0223041.2874283.7286080.2056539 1.4305583.1758790.885478216 0.5918137  
0.975487637 2.0310092.2689420.4939547 1.1626351.1125162.0606540.8858929  
0.4732632 3.9331590.467924279 6.0084950.5880222.0484521.5612830.325408  
0.2676042 0.6402991 2.9416941.35567910.097950.9770888 0.4919563 0  
0.5663115 2.242471722 2.6532531.12525 1.1692911.13679 3.2451570.5797858  
1.5498720.5289734 1.9513361.3774162.273686016 0.533803479 1.741009  
0.6294017 0.6196043.3682180.7778622 0.7516420.5682576 0.2207561  
2.8390270.3495564 2.7449581.6837962.9831293.1262253.5852880.4265313  
2.1866070.6884231 2.297166013 12.894441.5178320.8896842 0.1983538  
0.1604582 1.3631992.0327590.7917957 2.0335971.56768511.616050.820234812  
0.4629911 2.2603790.7466918 0.3900483 0.4387191.85891092 0.4098556  
0.4389027 1.7892130.6008933 1.0131441.3366580.760693662 1.094344  
2.8879880.8068418 0.9620262 1.581146451 0.5975511 0.1276521  
0.6619549 1.734261537 2.077071196 0.4456547 1.3180810.1331922  
0.4166042 1.0935330 0.9581899 0.4416706 0.5206918 0.4583424  
0.8418696 3.6293631.858898948 0.1857684 34.125310.9566772 2.81212  
1.1072771.9487663.3660990.1667251.7844884.4040051.3364010.8703636  
3.3150530.9767508 0.9838450.5734647 2.5754170.2855099 6.4479411.43283  
1.4392480.6674792 0.2138895 0.6700845 1.2550210.5875931 2.83269  
0.2092241 1.47869 2.4726633.5224152.1331132.2578390.7962246 0.4546397  
0.9288622 2.9187945.1350990.8238641 0.05758788 5.1442470.5641301  
0.4295977 2.3431984.9427652.7414051.4668211.03741603 1.0420520.2943133  
2.7398570.3901950.6757192 1.135408241 0.559388305 0.2310543 1.746687233



1.0591473.0239945.27798613.083172.9237541.3340270.8227143 0.2362455  
0.8646423 0.4462072.0436410.541561995 0.7854904 4.2091250.3956456  
0.4636935 2.79959 1.36153 2.0257032.1908240.8362048 3.062383  
AC022272.1 0.03811194 0.1175171 0.02204516 0.814598713 0.080494693  
0.1182823 0.09346795 0.1195923 0.2694275 0.1986698 0 0.064933646  
0.3290399 0.08195462 0.06995259 0.6150738 0.1796996 0 0  
0.0923353 0.080907478 0.1321581 0.07996655 0 0.2846230 0.24224  
0.2773225 0.06399427 0.026436985 0.09621952 0.060239344 0 0  
0.03213014 0.165927663 0.02593744 0.03817719 0.1474908 0 0  
0.07507239 0.04547717 0.05484942 0.1112753 0.07704119 0 0.06050139  
0.07798674 0 0.05332917 0.03230089 0.06801906 0 0.06013036  
0.2019989 0.08543042 0.1179143 0.04092449 0 0.03675974 0.1113283  
0.0932163 0.09890913 0.09079708 0.034803755 0 0.1723318 0.1956709  
0.143214156 0.02929713 0.2020298 0.07026091 0 0.05303226 0.06561619  
0.0580484 0.2282092 0.2413118 0 0.05820488 0 0.03028574  
0.04854961 0.037010394 0.03616555 0.1117649 0.09574331 0.02942234  
0.05450045 0.2844490.020722787 0.06490529 0.01713324 0.08128912  
0.093117198 0 0 0.02822526 0.01959213 0.04748094 0.2085015  
0.1664155 0 0 0.020984721 5.7892920.076757376 0.04187942 0.03420943  
0.1128937 0.07825517 0.1144646 0 0 0 0.1322663 0.02402111  
0.1628229 0 0.08687936 0.02947531 0.3262157 0.01726112 0 0  
0.0622602 0.07929068 0 0.1331725 0.08548479 0 0 0.05027858  
0.03321123 0.04866439 0.04805658 0 0.08662305 0.01995237 0.03464723  
0.2921668 0 0.02877243 0.1152775 1.2635960 0.02836991 0.2005888  
0.03911825 0 0.03096758 0.06804709 0.08648582 0.1499909 0.02418638  
0.08148768 0.05494439 0 0.1095486 0 0.0581359 0.130358674  
0.06569534 0.03224135 0.1335610.07805701 0.02819513 0.07772896  
0.04237792 0 0.2164108 0.105342929 0 0.1315207 0 0.02583739  
0.1516629 0.02440917 0.2775853 0.1386812 0.09695183 0.0286115 0  
0.1719757 0.02781975 0.06092427 0.02284726 0.2205448 0.03078864  
0.2317152 0.026476906 0.03082947 0.02433495 0 0.1449406 0.08840594  
0.06671217 0.048038184 0 0 0.07625024 0.1633423 0.05554137  
0.1484136 0 0.1497565 0.03986989 0.2016975 0.05735209 0.05455613  
0.1311296 0.06560092 0 0.06388262 0.08219588 0.08709095 0.089801368  
0 0.04187519 0.052931769 0.142110026 0 0.032733189 0 0.1503949  
0.06148046 0 0.2701244 0.08623232 0.06600611 0.072164371 0 0  
0.1290345 0.09853003 0.07745165 0.02791438 0.0539052 0.0205419  
0.0430541 0.04178936 0.1317210 0 0.053274911 0 0.07215313  
0.07755788 0 0 0.02353104 0 0 0.1204998 0.122451227 0  
0.1007212 0.1705058 0.1368243 0 0.07203025 0.06186832 0.05865239  
0.1665867 0.03219332 0 0.02808876 0 0.05471933 0.023088512  
0.09257738 0.1087263 0.02447936 0.08924602 0.09705439 0 0.0270391  
0.02076408 0.2144712 0.03089627 0.053886927 0.067051763 0.06694607 0  
0 0.2197851 0.06106769 0.07867896 0.02855184 0.02772947 0.4937731

|             |             |             |             |             |             |             |
|-------------|-------------|-------------|-------------|-------------|-------------|-------------|
| 0.0548853   | 0.4056444   | 0.1345934   | 0.0591655   | 0.2653306   | 0.1452751   | 0           |
| 0.3484525   | 0.02543345  | 0.174125041 | 0.1318964   | 0           | 0.09312868  | 0           |
| 0.05523654  | 0.6963750   | 0.08288209  | 0.07095633  | 0.03395154  | 0.1333388   |             |
| 0.041212313 | 0           | 0.04436393  | 0           | 0.04899448  | 0.02755404  | 0.164179874 |
| 0.1029650   | 0.1575176   | 0.2332264   | 0           | 0.07953899  | 0           | 0.075435584 |
| 0.2550684   | 0.1013485   | 0.0566444   | 0.103442657 | 0.0833991   | 0           | 0           |
| 0.03513595  | 0.111022837 | 0.05597927  | 0.1839621   | 0           | 0           | 0.06017975  |
| 0.02521765  | 0.04671771  | 0.0319850   | 0.03524945  | 0.1919533   | 0.022892035 | 0           |
| 2.8336410   | 0.1218049   | 0           | 0.1019946   | 0.2140861   | 0           | 0.08301924  |
| 0.2420219   | 0.06994463  | 0.02484717  | 0.1910130   | 0.1022425   | 0.03432835  |             |
| 0.06548515  | 0.0647003   | 0           | 0.3137070   | 0.4189183   | 0.1004366   | 0.1164485   |
| 0.02805674  | 0           | 0.02306511  | 0           | 0.0657023   | 0.04643506  | 0.08627623  |
| 0.04757583  | 0.2009574   | 0.1233088   | 0.02381305  | 0.06118703  | 0.1555675   |             |
| 0.07482317  | 0.1378262   | 0.04703939  | 0           | 0.1059304   | 0.02530755  | 0.02075475  |
| 0.2308488   | 0           | 0.1110811   | 0.0746957   | 0           | 0.01869908  | 0.02640649  |
| 0.02775461  | 0.08168818  | 0.08083618  | 0           | 0.100379295 | 0.02902303  | 0.099728954 |
| 0.03501076  | 0           | 0.9471069   | 0.03319989  | 0.1311631   | 0.02792814  | 0.07046062  |
| 0           | 0.01292963  | 0           | 0.1234156   | 0.09070176  | 0           | 0.1468649   |
| 0.1818932   | 0.02137795  | 0.1370122   | 0.1965659   | 0           | 0.02113571  |             |
| AP001020.3  | 0.04319279  | 0.01775784  | 0.0299809   | 0.018463921 | 0.063858027 |             |
| 0.1206458   | 0.02824761  | 0.02710711  | 0           | 0.06004139  | 0.01642026  | 0.058872162 |
| 0.09651672  | 0.024768082 | 0.015855648 | 0.08364861  | 0.04073122  | 0.06641025  | 0           |
| 0.1925466   | 0.073354855 | 0.2995531   | 0.3715715   | 0.01880715  | 0.1290269   |             |
| 0.06707656  | 0.07320907  | 0.1526568   | 0.07252559  | 0.035953683 | 0.02180938  |             |
| 0.100129457 | 0           | 0.07961159  | 0.1019579   | 0.009402406 | 0.2116459   | 0.01730669  |
| 0.1560099   | 0.0595969   | 0           | 0.02268815  | 0.02061596  | 0.03729697  | 0.1008879   |
| 0.1862653   | 0.0650673   | 0.04114024  | 0.03535338  | 0.02115016  | 0.03626321  |             |
| 0.0732141   | 0.1387565   | 0.04585423  | 0.02725863  | 0.09157125  | 0.1032741   |             |
| 0.08018036  | 0.1020366   | 0.07004833  | 0.1833054   | 0.07570192  | 0           | 0.05978405  |
| 0.06860106  | 0.094664588 | 0           | 0.4101427   | 0.0633590   | 0.038953582 | 0.09296797  |
| 0.1274043   | 0.058025116 | 0.1682861   | 0           | 0.05262965  | 0.1477901   | 0.1580118   |
| 0.01645584  | 0.1319288   | 0.04277205  | 0.0137293   | 0.00733626  | 0           | 0.02459215  |
| 0.1435534   | 0.1302087   | 0           | 0.02470645  | 0.05372833  | 0.046970845 | 0.04903871  |
| 0.0233008   | 0.1596852   | 0.042212405 | 0.2917063   | 0           | 0.07208509  | 0.1023619   |
| 0.03552646  | 0.1183838   | 0.1260254   | 0.1257340   | 0.07864056  | 0.03390778  |             |
| 0.095129102 | 7.0460350   | 0.046394773 | 0.03797002  | 0.2636362   | 0           | 0.08868767  |
| 0.02594486  | 0.03347691  | 0           | 0.01408669  | 0.05995968  | 0.04355753  | 0.02952471  |
| 0.02031457  | 0.07876927  | 0.09353338  | 0.08215661  | 0.4616695   | 0.01326984  | 0           |
| 0.05644828  | 0.035944492 | 0.02544544  | 0.03018525  | 0.01937622  | 0.04763027  | 0           |
| 0.1025666   | 0.0903330   | 0.1323649   | 0.07624847  | 0           | 0.05890266  | 0.07235936  |
| 0.09105709  | 0.08743562  | 0.03912983  | 0           | 2.2912810   | 0.1261086   | 0.01286081  |
| 0.03637281  | 0.0531999   | 0           | 0.02807679  | 0.092542454 | 0.1764280   | 0.1495884   |
| 0.043857216 | 0.04925393  | 0.04981539  | 0.01316329  | 0.03724589  | 0.07369455  | 0           |
| 0.059094918 | 0.01489069  | 0.02923165  | 0.04540998  | 0.1415409   | 0.1661604   |             |

|             |             |             |             |             |             |             |
|-------------|-------------|-------------|-------------|-------------|-------------|-------------|
| 0.08221855  | 0.09125222  | 0           | 0.09810453  | 0.015918214 | 0.1382715   | 0.08943253  |
| 0.2589409   | 0.03513825  | 0.1890698   | 0.0221306   | 0.1944746   | 0.04715081  |             |
| 0.05493843  | 0.1297032   | 0           | 0.05568641  | 0.01261141  | 0.01380926  | 0.06214348  |
| 0.1666310   | 0.04187183  | 0.1650667   | 0           | 0.1118063   | 0.02206331  | 0.01474505  |
| 0.1752141   | 0.06679445  | 0.07056544  | 0.043553873 | 0.08708763  | 0.04040801  |             |
| 0.03456618  | 0.01851181  | 0.025178322 | 0.02990209  | 0.03248516  | 0.1629323   |             |
| 0.0903702   | 0.1485812   | 0.2686581   | 0.06182922  | 0.0198148   | 0.20817     |             |
| 0.03703032  | 0.2027174   | 0.07452299  | 0.1974028   | 0.101773138 | 0.026873457 |             |
| 0.2467802   | 0.035992985 | 0           | 0           | 0           | 0.06064009  | 0.1022668   |
| 0.075643895 | 0.1749347   | 0.09772828  | 0.08976677  | 0.032713953 | 0.06174695  |             |
| 0.06399413  | 0           | 0.1935534   | 0.07022163  | 0.2151231   | 0.09774642  | 0.3631746   |
| 0.05855257  | 0.03788837  | 0.06824283  | 0.088237853 | 0.06318664  | 0.024150879 |             |
| 0.0345228   | 0.0572405   | 0.1406359   | 0           | 0.04524985  | 0.1386739   | 0.01576414  |
| 0           | 0.2185026   | 0.022204108 | 0.2294846   | 0.4413752   | 0.06324106  | 0.1654026   |
| 0.01029425  | 0.01088438  | 0.04206974  | 0.3057692   | 0.03356356  | 0.1167524   |             |
| 0.05563819  | 0.02546671  | 0.02151013  | 0           | 0.04186645  | 0.01678708  | 0.1478652   |
| 0.09987409  | 0.1294640   | 0.07332873  | 0.0550244   | 0.02451503  | 0.04706443  |             |
| 0.0555573   | 0.0840364   | 0.073284963 | 0.060792555 | 0.08092897  | 0.08959977  |             |
| 0.05428     | 0.0996342   | 0.04152531  | 0           | 0.04530147  | 0.01257048  | 0.2611466   |
| 0.04976182  | 0.0919445   | 0.06101462  | 0.08940411  | 0.09622491  | 0.09219967  | 0           |
| 0.06504335  | 0.02305927  | 0.112764758 | 0.1435008   | 0.07626145  | 0.08443522  |             |
| 0.01411853  | 0.01522824  | 0           | 0.5962931   | 0.01878628  | 0.1715537   | 0.1077377   |
| 0.1727026   | 0.084071676 | 0           | 0.06033391  | 0.02834583  | 0.01110522  | 0.0249819   |
| 0.074426932 | 0.05445611  | 0.02677753  | 0.2306782   | 0.03110596  | 0.01802853  |             |
| 0.05436649  | 0.068393756 | 0.01074397  | 0.3340394   | 0.01148596  | 0.0342378   |             |
| 0.03751456  | 0.03780694  | 0           | 0.1256453   | 0.063712096 | 0.11324135  | 0.05075367  |
| 0.08339471  | 0.03792171  | 0.01317923  | 0.05414684  | 0.02318229  | 0.2728102   |             |
| 0.05715902  | 0.01058917  | 0.08699771  | 0.03994869  | 0.04350866  | 0.145285625 |             |
| 0.03966816  | 2.6625460   | 0.04539659  | 0.1012316   | 0           | 0.02311839  | 0.3518089   |
| 0.01898758  | 0.1129042   | 0.1097147   | 0.03170769  | 0.01126385  | 0.04329553  |             |
| 0.02317456  | 0.04668576  | 0.02968609  | 0.01955353  | 0.04877322  | 0.2844228   |             |
| 0.1828728   | 0.1062377   | 0.02111564  | 0           | 0           | 0.06871583  | 0.02091201  |
| 0.09488315  | 0.01489226  | 0           | 0.1760005   | 0.3342938   | 0.1518319   | 0.09316503  |
| 0.04318026  | 0.01849176  | 0           | 0.05087888  | 0.1624483   | 0.03198624  | 0           |
| 0.1800787   | 0.01147256  | 0           | 0.1046497   | 0.05803195  | 0.1384788   | 0.07901009  |
| 0.110762622 | 0.06781417  | 0.01197074  | 0.1761462   | 0           | 0.1099353   | 0.043102234 |
| 0.0455045   | 0           | 0           | 0.03174255  | 0.1110934   | 1.0733690   | 0.1655540   |
| 0.03798162  | 0.1916496   | 0.01681561  | 0.04689064  | 0.03176036  | 0.08951592  |             |
| 0.082234851 | 0.1118201   | 0.1997329   | 0.02816147  | 0.01886001  | 0.05497123  |             |
| 0.1066029   | 0.2484445   | 0.1782167   | 0           | 0.1533017   |             |             |
| LINC02595   | 0.3158717   | 0           | 0.04567757  | 0.084392427 | 1.334280026 | 0           |
| 0.06194879  | 0           | 0.03430365  | 0.8255670   | 0.336356285 | 0           | 0.113206649 |
| 0.06205628  | 0.07588477  | 0           | 0           | 0.083820148 | 0           | 0.04142267  |
| 0.3216758   | 0.3576820   | 0.4600946   | 0.04104373  | 0.06629806  | 0.602551763 |             |

0.4984171 1.539396346 0 1.1436170.1331473 0 0.8598779 1.186547  
0.4074681.2257892.6808575.02945 0 0.1704720.5379791 0.3192587  
0.3469678 0 1.2523110.09667034 0.4419922 0 0.07046775 0.366772701  
0.9967209 0.2615885 0.05900394 0.7329554 0.9327510.4482346 0  
0.05766804 0.5794325 0.6831324 0.3762631 0.360566897 0.8600585 0  
0.05791858 4.629139803 0.1821110.6976761 0.09705374 0.265213463  
0.03662761 2.1073295.8334 0 0.4444428 0 0.1206005 0.3909936  
0.8157766 0.1005948 0.996911969 0.6744152 0.7333269 0.1983801 0  
0.07528329 0.2455743 1.37400367 0.3586234 1.1715020.1122874 0  
0.2352868 0 0.1647385 0 1.3396320 0.2160076 0 0 0.671585  
1.478331621 0.1303849 0.212055044 0 0.07088194 0 0.08107236  
0.4348127 0.2295177 0.8073415 0.06438557 0.3288669 1.6424670  
1.2070650.2400187 1.5268210.03755105 0 0.5458681 0.05542977  
0.06450157 0.16429029 0.03876754 0.1839556 0.4428112 0.05442552  
0.305117922 0.6771520.2064410 3.9331430.7721665 2.9614690 2.29725  
0.1135068 0.2854565 9.6578680 21.577340.05764002 0 0.083124  
0.08105301 0.5366455 0 0 0 0 0.601370147 0.4502466 0.7969134  
0 0.1702385 0.2694666 2.2886941.51257777 0.06806037 0.2004122  
0.06918462 0.2021677 0 0.8589568 1.0975880.1108958 0.1793612  
0.800325347 0 0.4087663 1.0081950.8565611 0 0.2528790.1568609 0  
0 0.3556982 0.2041295 0.2036192 0 0.06311754 0.6627534  
0.4569689 2.9345260.4801139 0.658321793 0 0 0.2695789 0.05005283  
0.1221181 0.5529105 0.64697826 0.8529611 0 0.5134691 1.353781  
0.460326872 0.7175305 0.2969577 0.1861773 4.6261830.2611982  
0.2376671 1.6390840.9056683 0 2.0310394.3018550.04257747 0.1203016  
0.465171088 1.39206896 0 0.329023875 1.118917499 0 1.55993284 0  
0.2337137 0 2.696795613 0.3198273 0.4913517 0 0 0.09407491 0  
0.05347188 1.3270020.5616794 1.2724490.5584579 0.1276885 0  
0.04329377 0 1.26753255 0.7701468 1.159048962 0.1183442 0.3737532  
0.5624497 0.3602324 0.2068220 0 0.1679654 0 0.202975154  
0.4290945 0 0.7708101 0.14175 0.4705158 0.09949779 0.7691470  
0.2301118 0.2668182 0.6357591 0.1163998 0 0.1133785 0.191357587  
1.6112910.1126404 0.5579337 1.5902930.4021934 0 0 0 0.5713513  
0 3.461265111 1.111450017 0.3698993 0 0.1240479 0.7400164  
1.2020561.14116 0.08873911 0.9192872 1.6483240.1137223 0.4202476  
0.4780757 0.9807273 0 1.9264640.6784059 0.04247021 0.474283  
0.72157417 0 3.5437510.3087402 0.1290622 0.6264287 0.1144501  
0.0801605 0.2575975 0.2940430.1406952 0.2368098 0.853919122  
0.5422552 1.5626750.5182373 0.7106159 2.2265870.98274424 0.426687  
0.3263764 0 0.9952249 0.3708108 0.3313215 0.625210117 0.8839279  
1.3506160.2099940.5085912 1.114532565 0 0.4152948 1.3639210.218405066  
1.610275224 1.6818412.4394840.5777584 0.3011894 0 1.5893780.4987698  
0.7837645 0.8227923 0 0.1825922 0.5468749 0.142296892 0.18131  
7.7928210.1383284 1.0936452.1347210.1584996 0 0.4339296 0.08600793

|                           |                   |                   |                   |                   |                           |                 |
|---------------------------|-------------------|-------------------|-------------------|-------------------|---------------------------|-----------------|
| 0                         | 0.04830842        | 0                 | 0.03957788        | 0                 | 1.2091820.8819540.4021771 | 4.086979        |
| 0.1181820.2571848         | 0.4855773         | 0.5308190.4870978 | 0.2325342         | 0.6281543         |                           |                 |
| 0.9080272                 | 0                 | 1.4294191.7318420 | 0                 | 0.6245756         | 0.04258263                | 0.2960439       |
| 1.6058740.08058396        | 0                 | 0                 | 2.1442440.3747051 | 0.05487197        | 0.4194979                 |                 |
| 0.9890882                 | 0.3587391         | 0                 | 0.1150801         | 0.5158983         | 1.012518045               | 1.12359         |
| 0.2735712                 | 0.2300302         | 0                 | 0.5443508         | 0.443263377       | 0.311978849               | 2.164886        |
| 0.206638393               | 0.07254231        | 0                 | 0.9812027         | 1.75415           | 0.3105942                 | 0.1736013       |
| 1.8979270                 | 0                 | 1.3064940.1022869 | 0                 | 0                 | 0.06086084                | 1.6733171.20684 |
| 0.1256276                 | 0.7087218         | 0.6083341         | 0.1163670.7681279 | 0                 |                           |                 |
| AL139353.2                | 0.1322746         | 0.05098313        | 0.1147678         | 0.035340212       | 0.034921483               |                 |
| 0.1026302                 | 0.05406633        | 0.1037668         | 0.08766547        | 0.09337257        | 0.2357146                 |                 |
| 0.070426358               | 0.1679404         | 0.094812939       | 0.060695882       | 0.02668411        | 0.07796015                |                 |
| 0.01588877                | 0.06426088        | 0.1842685         | 0.087751411       | 0.3010082         | 0.2168272                 |                 |
| 0.3509723                 | 0.1347051         | 0.2246746         | 0.1313655         | 0.3781249         | 0.166578                  |                 |
| 0.137631741               | 0.1669739         | 0.087113289       | 0.02910248        | 0.2394507         | 0.1672705                 |                 |
| 0.224954276               | 0.1575363         | 0.1490637         | 0.5972103         | 0.0855520.2327418 |                           |                 |
| 0.09770728                | 0.1578370.2974456 | 0.09655046        | 0.1336929         | 0.1660530.1443622 |                           |                 |
| 0.1437921                 | 0.2226494         | 0.1041125         | 0.1541461         | 0.07377277        | 0.120677785               |                 |
| 0.1304335                 | 0.2957659         | 0.2100224         | 0.1619923         | 0.2751949         | 0.2145176                 |                 |
| 0.06379078                | 0.1448946         | 0.3504850.2002482 | 0.1838248         | 0.271784093       |                           |                 |
| 0.1108180.2429821         | 0.2667941         | 0.086984008       | 0.1016812         | 0.2045114         |                           |                 |
| 0.2336931                 | 0.124943528       | 0.2224038         | 0.2704332         | 0.2014678         | 0.2262979                 |                 |
| 0.4652876                 | 0.01574836        | 0.2398880.2046658 | 0.1182513         | 0.1474379         |                           |                 |
| 0.080282178               | 0.1255193         | 0.08081271        | 0.2076844         | 0.2042315         | 0.1655097                 |                 |
| 0.1953899                 | 0.026970864       | 0.1783355         | 0.1635263         | 0.4231936         | 0.181789103               |                 |
| 0.1642147                 | 0.06928786        | 0.1552184         | 0.2693929         | 0.1274965         | 0.07209627                |                 |
| 0.1959868                 | 0.1082955         | 0.1222968         | 0.1298            | 0.182078483       | 2.3478020.122100371       |                 |
| 0.09084397                | 0.3265081         | 0.1175456         | 0.1018497         | 0.5379707         | 0.1441694                 |                 |
| 0.1300318                 | 0.3639888         | 0.1032873         | 0.1563183         | 0.2401706         | 0.09720598                |                 |
| 0.1758931                 | 0.2301740.1729738 | 0.1647468         | 0.1015947         | 0.1740885         |                           |                 |
| 0.1485589                 | 0.257993545       | 0.08117156        | 0.2599875         | 0.08344432        | 0.1139563                 |                 |
| 0.085180883               | 0.1417822         | 0.1873069         | 0.04222472        | 0.1772137         | 0.1243665                 |                 |
| 0.09395046                | 0.3462421         | 0.2555306         | 0.1663626         | 0.3347061         | 0.07489507                |                 |
| 0.1000231.2854180.1568928 | 0.07384731        | 0.08702261        | 0.1187963         | 0.07490864        |                           |                 |
| 0.1343485                 | 0.191888234       | 0.1500826         | 0.1431572         | 0.167886696       | 0.2238977                 |                 |
| 0.1191842                 | 0.2015579         | 0.09505222        | 0.09873671        | 0.1765501         | 0.135730238               |                 |
| 0.2137574                 | 0.09791217        | 0.1014012         | 0.2116496         | 0.1712488         | 0.146127                  |                 |
| 0.1424842                 | 0.06965818        | 0.0751094         | 0.076169231       | 0.1654086         | 0.1711752                 |                 |
| 0.2019179                 | 0.08967348        | 0.1727166         | 0.1270749         | 0.3612793         | 0.3459481                 |                 |
| 0.1892753                 | 0.3847935         | 0.07479618        | 0.2398154         | 0.2534533         | 0.07929339                |                 |
| 0.1189435                 | 0.1913605         | 0.2938587         | 0.31594           | 0.11486631        | 0.1604992                 |                 |
| 0.1794753                 | 0.08466675        | 0.1257609         | 0.1022764         | 0.3087161         | 0.156305146               |                 |
| 0.1428746                 | 0.2320245         | 0.06616018        | 0.1948754         | 0.096383348       | 0.164545                  |                 |
| 0.2331640.1039516         | 0.1297274         | 0.2187590.1327008 | 0.1656788         | 0.1390613         |                           |                 |

|             |             |             |             |             |             |
|-------------|-------------|-------------|-------------|-------------|-------------|
| 0.3272904   | 0.07087656  | 0.2494311   | 0.1693827   | 0.05037757  | 0.077918105 |
| 0.162881258 | 0.3633392   | 0.241118836 | 0.086313393 | 0.1292668   | 0.071004153 |
| 0.1624924   | 0.2283635   | 0.5512302   | 0.130305161 | 0.1841551   | 0.2712274   |
| 0.1813602   | 0.172191199 | 0.03939485  | 0.1020714   | 0.1119595   | 0.07836741  |
| 0.1176046   | 0.2300949   | 0.2338601   | 0.1425890   | 0.05603524  | 0.1087783   |
| 0.1061269   | 0.132698131 | 0.1209401   | 0.150231679 | 0.2064911   | 0.1565131   |
| 0.2944146   | 0.09051066  | 0.2309570   | 0.3470927   | 0.07543198  | 0.1172288   |
| 0.1045543   | 0.11687221  | 0.2894970   | 0.3932682   | 0.3362342   | 0.2473304   |
| 0.1477751   | 0.08333148  | 0.1476238   | 0.1653958   | 0.06424114  | 0.6145311   |
| 0.09318077  | 0.0974873   | 0.2264389   | 0.08308723  | 0.280465475 | 0.1044248   |
| 0.09433871  | 0.1699204   | 0.0619490   | 0.2666693   | 0.09215281  | 0.08211371  |
| 0.1171066   | 0.1329218   | 0.4021172   | 0.093512323 | 0.334528769 | 0.24203     |
| 0.2572429   | 0.1947988   | 0.4171591   | 0.2119468   | 0.1479129   | 0.1238681   |
| 0.06015018  | 0.3927302   | 0.07143363  | 0.3373009   | 0.1418078   | 0.1026725   |
| 0.09208794  | 0.2268919   | 0.06456581  | 0.29345     | 0.1875770   | 0.194250046 |
| 0.1216379   | 0.1292882   | 0.04053461  | 0.1020147   | 0.1557634   | 0.5706568   |
| 0.1078717   | 0.3180951   | 0.1325646   | 0.3140275   | 0.169854097 | 0.1135375   |
| 0.23096     | 0.1898901   | 0.06376668  | 0.1912629   | 0.087055362 | 0.1191198   |
| 0.1281314   | 0.2483558   | 0.2232647   | 0.1897878   | 0.1040583   | 0.130906641 |
| 0.1439488   | 0.3073829   | 0.0879372   | 0.1064889   | 0.188483957 | 0.05427228  |
| 0.1043454   | 0.07515215  | 0.335351162 | 0.15653848  | 0.1275005   | 0.1995234   |
| 0.1088741   | 0.07567574  | 0.1165926   | 0.06655686  | 0.0783244   | 0.1203435   |
| 0.1520086   | 0.1942674   | 0.1682172   | 0.2290096   | 0.109245241 | 0.1012339   |
| 3.1739190   | 0.3041140   | 0.15853     | 0.2793552   | 0.2654935   | 0.08126846  |
| 0.0999419   | 0.1980920   | 0.3449927   | 0.1719521   | 0.08623673  | 0.2900389   |
| 0.02217822  | 0.1787144   | 0.1136392   | 0.1497030   | 0.0622351   | 0.4454095   |
| 0.2490535   | 0.1307189   | 0.2829095   | 0.08741884  | 0.1217202   | 0.1183708   |
| 0.2601683   | 0.3026795   | 0.09976404  | 0.08058078  | 0.2245783   | 0.1548008   |
| 0.1598346   | 0.1159075   | 0.04132383  | 0.1415740   | 0.1518542   | 0.2921488   |
| 0.3348461   | 0.1836664   | 0.1412205   | 0.1608475   | 0.1537105   | 0.2070955   |
| 0.1251881   | 0.0555370   | 0.09638197  | 0.07561323  | 0.212001266 | 0.1541343   |
| 0.1145608   | 0.1444913   | 0.1063178   | 0.1227437   | 0.123747453 | 0.119757375 |
| 0.163686    | 0.100953989 | 0.04556677  | 0.3986894   | 0           | 0.2088479   |
| 0.1138065   | 0.2547362   | 0.04827798  | 0.1458427   | 0.1215796   | 0.1927516   |
| 0.118049024 | 0.1987378   | 0.2166320   | 0.1482290   | 0.0541475   | 0.4559349   |
| 0.2225885   | 0.2923795   | 0.2680513   | 0.4951492   |             |             |
| 0.1188816   | GSN-AS1     | 0.07771619  | 0.07668343  | 0.05754051  | 0.17275376  |
| 0.052525195 | 0.1447176   | 0.1219813   | 0.2389899   | 0.1648214   | 0.2781815   |
| 0.06499845  | 0.04766754  | 0.3252201   | 0.053477842 | 0.176878862 | 0.05518619  |
| 0.1368026   | 0.1015674   | 0.0483272   | 0.1265282   | 0.032996594 | 0.1185760   |
| 0.05218056  | 0.09813439  | 0.1055256   | 0.06839096  | 0.09220685  | 0.1583411   |
| 0.1357141   | 0.081941887 | 0.07063438  | 0.117923922 | 0.02553417  | 0.1596148   |
| 0.1467611   | 0.040602287 | 0.1353996   | 0.07473527  | 0.1764440   | 0.09650869  |
| 0.03603617  | 0.01632899  | 0.1335385   | 0.1252681   | 0.1089157   | 0.1340578   |
| 0.07804979  |             |             |             |             |             |

|             |             |             |             |             |             |
|-------------|-------------|-------------|-------------|-------------|-------------|
| 0.0345441   | 0.02862488  | 0.1369987   | 0.05654818  | 0.05005859  | 0.05548059  |
| 0.049502929 | 0.01471382  | 0.06590515  | 0.01858197  | 0.1763268   | 0.1134939   |
| 0.1512444   | 0.1139375   | 0.07264503  | 0.07603303  | 0.1129470   | 0.05431049  |
| 0.085164342 | 0.03125263  | 0.09136698  | 0.2188819   | 0.037380609 | 0.01911725  |
| 0.2197174   | 0.08023286  | 0.093963409 | 0.3489351   | 0.05352066  | 0.0473479   |
| 0.09572999  | 0.1574632   | 0.07106106  | 0.02848532  | 0.05387141  | 0.04940587  |
| 0.005280013 | 0.042263181 | 0.09439642  | 0.1367437   | 0.1718073   | 0.0239987   |
| 0.005927195 | 0.03093524  | 0.104797348 | 0.02823509  | 0.06987468  | 0.1237684   |
| 0.022785659 | 0.08644803  | 0.06774005  | 0.0907912   | 0.05064903  | 0.02556891  |
| 0.0464741   | 0.05668895  | 0.01809852  | 0.03891164  | 0.06914443  | 0.092428818 |
| 5.1840530   | 0.091825221 | 0.01366379  | 0.06138736  | 0.0589332   | 0.0319149   |
| 0.03734578  | 0.02409382  | 0.05867402  | 0.01013839  | 0.03020769  | 0.07445383  |
| 0.09562213  | 0.01462069  | 0.0519671   | 0.05289219  | 0.06208577  | 0.1323449   |
| 0.06207822  | 0           | 0.08633162  | 0.045272099 | 0.01831345  | 0.1086238   |
| 0.05142029  | 0.032030015 | 0.09022277  | 0.1408636   | 0.04763246  | 0.1215136   |
| 0.1356177   | 0.02119655  | 0.04556832  | 0.07912925  | 0.04766189  | 0.01348472  |
| 0.09856807  | 0.07835625  | 6.6460290   | 0.04991918  | 0.04165249  | 0.1047122   |
| 0.01914437  | 0.08450223  | 0.07577728  | 0.016651036 | 0.08465188  | 0.05383047  |
| 0.035510257 | 0.07089753  | 0.1523746   | 0.06157978  | 0.06254827  | 0.1272937   |
| 0.04741927  | 0.072303495 | 0.04286817  | 0.06837494  | 0.07081147  | 0.09550225  |
| 0.1287872   | 0.1141211   | 0.08641519  | 0.02182759  | 0.0847287   | 0.091652551 |
| 0.03109875  | 0.01609147  | 0.08627942  | 0.03793425  | 0.1670027   | 0.1075121   |
| 0.2387658   | 0.07918195  | 0.09094196  | 0.00933493  | 0.05223237  | 0.1522976   |
| 0.04992136  | 0.02981618  | 0.1863565   | 0.02998169  | 0.2159729   | 0.1674012   |
| 0.073427137 | 0.2162594   | 0.0198491   | 0.05836726  | 0.1024596   | 0.1201823   |
| 0.0979463   | 0.031346352 | 0.08506331  | 0.05331742  | 0.1026209   | 0.1132474   |
| 0.099666615 | 0.08070362  | 0.07598512  | 0.06840441  | 0.05853667  | 0.09048437  |
| 0.1528145   | 0.03559951  | 0.05466715  | 0.09631477  | 0.07329095  | 0.08337064  |
| 0.06369189  | 0.05209366  | 0.219742798 | 0.029011824 | 0.2937418   | 0.047491899 |
| 0.027819313 | 0.07953934  | 0.234953234 | 0.06110097  | 0.09200362  | 0.0501473   |
| 0.043553604 | 0.1007224   | 0.1582570   | 0.05024946  | 0.047089411 | 0.03703348  |
| 0.03838125  | 0.03367954  | 0.05625707  | 0.0315872   | 0.1593810   | 0.08793689  |
| 0.1474463   | 0.08428227  | 0.02726881  | 0.1074398   | 0.054433765 | 0.06063512  |
| 0.047799776 | 0.1397619   | 0.06179523  | 0.1138699   | 0.04537885  | 0.04885046  |
| 0.0499028   | 0.06807407  | 0.04848886  | 0.03440052  | 0.067917626 | 0.07507426  |
| 0.1095393   | 0.03540095  | 0.02976066  | 0.06297582  | 0.05091872  | 0.1362519   |
| 0.06697677  | 0.1690933   | 0.1470497   | 0.0100109   | 0.07789722  | 0.02322173  |
| 0.00446325  | 0.048964321 | 0.0120819   | 0.008868394 | 0.04392717  | 0.203825    |
| 0.3588751   | 0.04455209  | 0.03528764  | 0.02032377  | 0.02499087  | 0.04032148  |
| 0.061534956 | 0.027345801 | 0.05460539  | 0.03224313  | 0.1220816   | 0.1478981   |
| 0.03486743  | 0.0727322   | 0.04424845  | 0.04071219  | 0.7562790   | 0.0358143   |
| 0.04963034  | 0.07841626  | 0.1029527   | 0.1731362   | 0.04502826  | 0.0825461   |
| 0.03009384  | 0.05808631  | 0.077100506 | 0.07745969  | 0.04116485  | 0.1731924   |
| 0.01524196  | 0.01095998  | 0.02703262  | 0.8393880   | 0.01352076  | 0.1196113   |

|     |             |             |             |             |             |             |
|-----|-------------|-------------|-------------|-------------|-------------|-------------|
|     | 0.08307899  | 0.1615855   | 0.060507601 | 0.1138474   | 0.1881672   | 0.05100226  |
|     | 0.1079      | 0.07641429  | 0.09820459  | 0.1063806   | 0.01284811  | 0.1763988   |
|     | 0.08395279  | 0.1038031   | 0.1108637   | 0.082039959 | 0.1005237   | 0.1849331   |
|     | 0.01653323  | 0.09240541  | 0.097874171 | 0.1428536   | 0.07847266  | 0.09042872  |
|     | 0.063049961 | 0.036222861 | 0.08675436  | 0.03601223  | 0.05913441  | 0.01897057  |
|     | 0.0292277   | 0.02502695  | 0.1178073   | 0.0246829   | 0.2019611   | 0.03130676  |
|     | 0.02875165  | 0.02739959  | 0.112033035 | 0.03806633  | 4.6562070   | 0.04900887  |
|     | 0.0761696   | 0.004201765 | 0.1788653   | 0.1135043   | 0.04099692  | 0.02708627  |
|     | 0.1353656   | 0.09508534  | 0.06485407  | 0.03427646  | 0.0250186   | 0.1400017   |
|     | 0.1735948   | 0.08091952  | 0.02340186  | 0.1814415   | 0.02277972  | 0.1201527   |
|     | 0.01519723  | 0.02739295  | 0.01830786  | 0.1285850   | 0.1091174   | 0.08536097  |
|     | 0.05894998  | 0.0681756   | 0.2146355   | 0.03492523  | 0.1584496   | 0.05028917  |
|     | 0.05050087  | 0.04658076  | 0.1459241   | 0.04882436  | 0.08543892  | 0.03069461  |
|     | 0.07080299  | 0.1209649   | 0.1032121   | 0.06432969  | 0.03765894  | 0.03132483  |
|     | 0.3941305   | 0.06905     | 0.232509261 | 0.06405898  | 0.07323185  | 0.07697052  |
|     | 0.04664098  | 0.1087928   | 0.065920266 | 0.085969397 | 0.0426114   | 0.10846021  |
|     | 0.03997975  | 0.00499722  | 1.0815270   | 0.06769976  | 0.04585062  | 0.05922783  |
|     | 0.1570903   | 0.03630731  | 0.08436968  | 0.1561990   | 0.05637266  | 0.136866728 |
|     | 0.08622702  | 0.1437507   | 0.07093876  | 0.03393456  | 0.08901808  | 0.167397    |
|     | 0.08940455  | 0.1053607   | 0.1259920   | 0.1551565   |             |             |
| FTX | 0.3549501   | 0.4367987   | 0.2402318   | 0.42320077  | 0.181044142 | 0.4871042   |
|     | 0.4974288   | 0.3902107   | 0.2389785   | 0.3671195   | 0.2707951   | 0.312659952 |
|     | 0.6425691   | 0.245770305 | 0.531831335 | 0.5299746   | 0.4174529   | 0.009281406 |
|     | 0.1152950   | 0.4703408   | 0.435708938 | 0.5358738   | 0.1595908   | 0.1235377   |
|     | 0.2524567   | 0.1499925   | 0.3197375   | 0.4593324   | 0.3527355   | 0.08709719  |
|     | 0.3078530   | 0.312955768 | 0.1246679   | 0.4704881   | 0.3379166   | 0.173456915 |
|     | 0.5159951   | 0.4595644   | 0.5357487   | 0.3414965   | 0.02799091  | 0.1268346   |
|     | 0.2074506   | 0.6845846   | 0.4793985   | 0.5011195   | 0.1454995   | 0.1571586   |
|     | 0.2421061   | 0.3251510   | 0.1148769   | 0.3253873   | 0.1379017   | 0.211481324 |
|     | 0.5066807   | 0.3743378   | 0.4510453   | 0.1543924   | 0.3552162   | 0.489493    |
|     | 0.3819488   | 0.4619933   | 0.1063049   | 0.1336854   | 0.1649066   | 0.220503239 |
|     | 0.07282597  | 0.4913228   | 0.6552676   | 0.181469992 | 0.3229708   | 0.1194651   |
|     | 0.2670877   | 0.450077886 | 0.3875108   | 0.02494314  | 0.5663695   | 1.119498    |
|     | 0.3023744   | 0.1655890   | 0.3798267   | 0.1733552   | 0.1036146   | 0.2235167   |
|     | 0.22041464  | 0.2039267   | 0.1581423   | 0.1122197   | 0.07829164  | 0.1427215   |
|     | 0.15018     | 0.076149145 | 0.0904673   | 0.1150626   | 0.3193104   | 0.271379231 |
|     | 0.3980921   | 0.06475906  | 0.4180924   | 0.1323301   | 0.1340585   | 0.4271658   |
|     | 0.2377774   | 0.1792386   | 0.05495349  | 0.2337860   | 0.194108669 | 22.541470   |
|     | 0.06898631  | 0.2037336   | 0.3919576   | 0.2131917   | 0.4496262   | 0.1543967   |
|     | 0.3570022   | 0.02362484  | 0.2882680   | 0.2830706   | 0.2269484   | 0.1533134   |
|     | 0.1798085   | 0.4183071   | 0.2594954   | 0.1946605   | 0.1780392   | 0.02033871  |
|     | 0.2721752   | 0.246154116 | 0.1161698   | 0.3403044   | 0.1706036   | 0.3661208   |
|     | 0.130615549 | 0.3886259   | 0.1472895   | 0.09866206  | 0.2435745   | 0.2687995   |
|     | 0.1152502   | 0.08090276  | 0.1141460   | 0.5761414   | 0.2199579   | 0.3901029   |



|             |             |             |             |             |             |            |
|-------------|-------------|-------------|-------------|-------------|-------------|------------|
| 0.2312787   | 15.553060   | 0.1480480   | 0.1150342   | 0.1575859   | 0.1759651   | 0.105748   |
| 0.1098713   | 0.258672157 | 0.1643823   | 0.3116935   | 0.25743585  | 0.1514406   |            |
| 0.2019018   | 0.1103810   | 0.1978065   | 0.3707802   | 0.2946614   | 0.244467158 |            |
| 0.2122724   | 0.2737202   | 0.1480835   | 0.2967236   | 0.5787726   | 0.4005348   |            |
| 0.5302682   | 0.0610361   | 0.3318051   | 0.204673134 | 0.2270645   | 0.07499382  |            |
| 0.5817085   | 0.1571480   | 0.1681536   | 0.0866024   | 0.7610261   | 0.2064783   |            |
| 0.1719899   | 0.1522681   | 0.1903727   | 0.4498376   | 0.0634519   | 0.158257    |            |
| 0.4197793   | 0.1816474   | 0.0546182   | 0.8682518   | 0.093938612 | 0.2461079   |            |
| 0.2713513   | 0.2060749   | 0.1928405   | 0.1157553   | 0.1944249   | 0.070000847 |            |
| 0.26429     | 0.2258947   | 0.2318843   | 0.3156367   | 0.218171065 | 0.1901479   |            |
| 0.1543628   | 0.3605439   | 0.5254087   | 0.7443638   | 0.1647236   | 0.1520846   |            |
| 0.1883117   | 0.4073098   | 0.1397333   | 0.2792677   | 0.4660816   | 0.2795659   |            |
| 0.500673383 | 0.24287493  | 0.4297944   | 0.33200183  | 0.154860994 | 0.1269959   |            |
| 0.141021751 | 0.2983192   | 0.4954792   | 0.2207261   | 0.164921454 | 0.4743035   |            |
| 0.1748272   | 0.3707946   | 0.274323464 | 0.2473839   | 0.3100494   | 0.2844945   |            |
| 0.3620641   | 0.2551661   | 0.1450209   | 0.1775918   | 0.1587777   | 0.1472981   |            |
| 0.2594661   | 0.4268043   | 0.20083547  | 0.2296029   | 0.135011761 | 0.3859888   |            |
| 0.1782825   | 0.2628867   | 0.1674270   | 0.2866906   | 0.1967904   | 0.08812699  |            |
| 0.1129904   | 0.1908602   | 0.359973059 | 0.3090618   | 0.1829309   | 0.3928215   |            |
| 0.4796661   | 0.06905809  | 0.2099238   | 0.1763883   | 0.1672196   | 0.3049018   |            |
| 0.3834533   | 0.1166388   | 0.3167681   | 0.04809963  | 0.0970706   | 0.257452722 |            |
| 0.3237672   | 0.1515466   | 0.1737029   | 0.3596126   | 1.7504140   | 0.1499576   |            |
| 0.3323402   | 0.07630087  | 0.4037599   | 0.1644274   | 0.238984831 | 0.123196132 |            |
| 0.2460039   | 0.3318421   | 0.3337884   | 0.4281858   | 0.2437479   | 0.2060383   |            |
| 0.2604866   | 0.03865032  | 3.7470760   | 0.2016847   | 0.3598011   | 0.3021108   |            |
| 0.1399440   | 0.2286205   | 0.2816446   | 0.1131481   | 0.2103772   | 0.1224638   |            |
| 0.283677293 | 0.7219971   | 0.1207929   | 0.2643324   | 0.08287383  | 0.01702622  |            |
| 0.06999151  | 3.2942670   | 0.1207751   | 0.2307701   | 0.2108019   | 0.5768666   |            |
| 0.164496406 | 0.1731762   | 0.1461579   | 0.1703477   | 0.12106     | 0.1117260   | 0.50853279 |
| 0.3500928   | 0.3393101   | 0.3008998   | 0.2521450   | 0.2393661   | 0.4406948   |            |
| 0.127448246 | 0.3423563   | 0.4668490   | 0.2439999   | 0.1866161   | 0.372251864 |            |
| 0.2166377   | 0.07111212  | 0.1097501   | 0.271581642 | 0.077373792 | 0.2252111   |            |
| 0.4335709   | 0.06006539  | 0.1805074   | 0.3178345   | 0.1036776   | 0.1486976   |            |
| 0.08308006  | 0.2279088   | 0.6808862   | 0.2411932   | 0.3618024   | 0.13053164  |            |
| 0.08500752  | 26.9554     | 0.3172283   | 0.2803876   | 0.2610960   | 0.4200292   | 0.2339734  |
| 0.09287876  | 0.2261706   | 0.6308673   | 0.2895197   | 0.1259377   | 0.2323555   |            |
| 0.2008084   | 0.2566397   | 0.1763277   | 0.7023232   | 0.1226966   | 0.3685959   |            |
| 0.5426171   | 0.3011950   | 0.1652612   | 0.05532107  | 0.08532322  | 0.3226820   | 0.3740971  |
| 0.2165921   | 0.1040661   | 0.2059363   | 0.3088364   | 0.4310338   | 0.2843455   |            |
| 0.2942660   | 0.2413926   | 0.07236275  | 0.4385991   | 0.2702090   | 0.3981855   | 0.151992   |
| 0.2566474   | 0.4463046   | 0.08337624  | 0.3524042   | 0.4863044   | 0.6204507   |            |
| 0.3765156   | 0.5047928   | 0.12384027  | 0.3980599   | 0.1104189   | 0.1793594   |            |
| 0.1138599   | 0.1434012   | 0.352398722 | 0.193969237 | 0.1985891   | 0.227463984 |            |
| 0.06210814  | 0.2018414   | 3.1802680   | 0.2166520   | 0.2421768   | 0.2901848   | 0.3660574  |

|                                   |                            |                     |                    |                     |                   |
|-----------------------------------|----------------------------|---------------------|--------------------|---------------------|-------------------|
| 0.0705038                         | 0.1359825                  | 0.2781638           | 0.3096379          | 0.152282664         | 0.2098594         |
| 0.4131331                         | 0.2479560.1739661          | 0.2202375           | 0.4307071          | 0.1810518           |                   |
| 0.5977759                         | 0.4775746                  | 0.3187005           |                    |                     |                   |
| AC005519.1                        | 0.1624706                  | 0.1113275           | 0.1253042          | 0.023150812         | 0.057191273       |
| 0.2689256                         | 0.2479260.3058920.09571376 | 0.1317441           | 0.1852955          | 0.036908151         |                   |
| 0.6050829                         | 0.295024642                | 0.159043636         | 0.5244101          | 0.2383288           | 0.1040848 0       |
| 0.7872479                         | 0.18395058                 | 0.4882694           | 0.5908867          | 0.2829740.6324094   |                   |
| 0.6027404                         | 0.3212737                  | 1.1371850.1636839   | 0.120213825        | 0.3691641           |                   |
| 0.273919356                       | 0.2796137                  | 0.5276212           | 0.4017795          | 0.141469416         | 0.4422836         |
| 0.4556965                         | 1.11778                    | 0.7472501           | 0.01793712         | 0.3698153           | 0.2843404 1.09117 |
| 0.3373262                         | 0.6568508                  | 0.3943227           | 0.2235276          | 0.3102925           | 0.1856325         |
| 0.1667171                         | 0.4498142                  | 0.3672880.359336825 | 0.4272247          | 0.7893582           |                   |
| 0.6150740.2569186                 | 0.5466428                  | 0.7904649           | 0.6686132          | 0.2214757           |                   |
| 0.08830659                        | 0.4310181                  | 0.08601479          | 0.197823828 0      | 1.3101220.7785324   |                   |
| 0.211646845                       | 0.4995729                  | 0.1913888           | 0.4659219          | 0.600222495         | 1.657888          |
| 0.2237766                         | 0.2969513                  | 1.1674230.9296478   | 0.6602562          | 0.4466277           |                   |
| 0.7776253                         | 0.08607176                 | 0.1379775           | 0.021036632        | 0.2158425           | 0.423513          |
| 0.7074639                         | 0.2006832                  | 0.3510834           | 0.4176739          | 0.318027322         | 0.6394619         |
| 0.07790797                        | 0.9240914                  | 0.502812434         | 0.6884765          | 0 0.3615329         | 0.6256841         |
| 0.0779529                         | 0.6207256                  | 0.2370237           | 0.7882521          | 0.4313869           | 0.2550897         |
| 0.489034568                       | 3.9702070.276315324        | 0.1428251           | 0.8750057          | 0.3080090.578241    |                   |
| 0.45543                           | 0.2728356                  | 0.01703635          | 0.08831232         | 0.1804317           | 0.2594174         |
| 0.6663470.5348960.6255060.6533945 | 0.5047553                  | 0.6279158           | 0.06655305         |                     |                   |
| 0.03041136                        | 0.5308286                  | 0.315480622         | 0.2658710.5046331  | 0.1093261           |                   |
| 0.2239528                         | 0.083700966                | 0.3286498           | 0.6984563          | 0.3042681           | 0.3960713         |
| 0.0325882                         | 0.2708                     | 0.2381586           | 0.9255906          | 0.3217548           | 0.09396885        |
| 0.2126045                         | 0.1419675                  | 3.1453310.15812     | 0.4998874          | 0.3192399           | 0.1667605         |
| 0.06542861                        | 0.4752516                  | 0.328761526         | 0.6882171          | 1.0742070.192464842 |                   |
| 0.7565180.6870661                 | 0.3135887                  | 0.2023684           | 0.2772036          | 0.4295762           |                   |
| 0.118552966                       | 0.5974575                  | 0.4214961           | 0.2846843          | 0.8651652           | 0.5609119         |
| 0.3681748                         | 0.4697067                  | 0.2129492           | 0.3075186          | 0.498972543         | 0.7368243         |
| 0.1308232                         | 0.3246707                  | 0.1321733           | 0.9590292          | 0.1803636           | 1.37698           |
| 0.6306091                         | 0.1515449                  | 0.3089917           | 0.1539931          | 0.6074504           | 0.1106888         |
| 0.5540676                         | 0.2597267                  | 0.3342860.1400016   | 0.9407603          | 0.18059303          |                   |
| 0.6133194                         | 0.8852437                  | 0.05546384          | 1.24949            | 0.3517483           | 0.5561463         |
| 0.423224482                       | 0.5771683                  | 0.1519956           | 0.09751608         | 0.2553195           | 0.063139202       |
| 0.3561783                         | 0.7942585                  | 0.4426306           | 0.3739224          | 0.4155860.9127667   |                   |
| 0.2325719                         | 0.2236013                  | 1.1186230.2553656   | 0.4901951          | 0.5372797           |                   |
| 0.5115240.433864768               | 0.179706824                | 1.5233140.376078862 | 0.290790171        | 0.1693613           |                   |
| 0.093027387                       | 0.5474376                  | 0.4701630.7571497   | 0.58804136         | 1.0308991.421414    |                   |
| 0.9879671                         | 0.799852568                | 0.2580694           | 0.6151614          | 0.4840633           | 0.7280555         |
| 0.1320701                         | 0.9202556                  | 0.7353505           | 0.9807820.02447186 | 0.1187649           |                   |
| 0.5775680.537375807               | 0.1848606                  | 0.423938904         | 0.8116142          | 0.3280935           |                   |
| 0.2975652                         | 0.03952807                 | 0.3404166           | 0.6286248          | 0.5534401           | 0.2150252         |

|             |             |             |             |             |             |             |
|-------------|-------------|-------------|-------------|-------------|-------------|-------------|
| 0.8047794   | 0.598568829 | 0.4577635   | 0.1717492   | 0.4405233   | 0.7388214   |             |
| 0.02581469  | 0.2047092   | 0.5626533   | 0.5667443   | 0.2525001   | 1.646875    |             |
| 0.3662475   | 0.1756215   | 0.02697028  | 0.04665354  | 1.08924742  | 0.2946765   |             |
| 0.4634985   | 0.4035066   | 0.05072726  | 1.3423610   | 0.1379836   | 0.1844276   |             |
| 0.3304632   | 0.9926549   | 0.9658756   | 0.520696724 | 0.343008761 | 0.4312561   |             |
| 0.3089455   | 0.22119     | 1.04625     | 0.2429752   | 0.1192559   | 0.3894913   | 0.03152274  |
| 0.1871064   | 0.3431636   | 0.9222699   | 0.2404368   | 0.4259743   | 0.8445549   |             |
| 0.7844535   | 0.2537762   | 0.8504916   | 0.4336896   | 0.438305974 | 0.9596112   |             |
| 0.07968308  | 0.2964312   | 0.03540477  | 0.01909378  | 0.03139634  | 0.2418889   | 0           |
| 0.9007354   | 0.5596416   | 1.1368430   | 0.327949919 | 0.3140346   | 0.7060583   |             |
| 0.3731821   | 0.2645594   | 0.4541881   | 0.207376675 | 0.3804131   | 0.05595791  |             |
| 1.7354020   | 0.3315163   | 0.1695368   | 0.2272230   | 0.228679633 | 0.3637231   | 1.111516    |
| 0.3744407   | 0.3756265   | 0.540928669 | 0.2607213   | 0.2278501   | 0.09846196  |             |
| 0.758905679 | 0.299749477 | 0.1034101   | 0.3555165   | 0.1901911   | 0.4792151   |             |
| 0.4582677   | 0.1744014   | 0.9919753   | 0.02866732  | 0.5178079   | 0.1272615   |             |
| 0.1602857   | 0.4636999   | 0.286259293 | 0.04973755  | 5.0368960   | 0.5502274   |             |
| 0.3577071   | 0.2781617   | 0.5652420   | 0.1825292   | 0.08332591  | 1.2268870   | 0.7664322   |
| 1.1529350   | 0.07061539  | 1.4331420   | 0.3196293   | 0.8975596   | 0.2977730   | 0.4167892   |
| 0.1426923   | 1.2968030   | 0.6966989   | 0.5899087   | 0.3309456   | 0.1718001   |             |
| 0.4624743   | 0.4135617   | 0.2622032   | 0.9914028   | 0.09336263  | 0.4750847   |             |
| 0.3923139   | 1.0546380   | 0.7234172   | 0.4906192   | 0.06767646  | 0.1391143   |             |
| 0.4200152   | 1.0844981   | 0.4884620   | 0.2005282   | 0.1027904   | 1.0386340   | 0.4315428   |
| 0.2241421   | 0.65607     | 0.0181907   | 0.9944282   | 0.3821119   | 0.925857759 |             |
| 0.2763415   | 0.09005636  | 1.8299770   | 0.1263546   | 0.486389953 | 0.370860007 |             |
| 0.01649663  | 0.491276354 | 0.1990005   | 0.9924655   | 0           | 0.7737008   | 0.1384552   |
| 0.1904916   | 0.5206457   | 0.04216818  | 0.5438388   | 0.2654828   | 0.5892531   |             |
| 0.14177541  | 0.02002923  | 1.2688620   | 0.2824799   | 0.09458978  | 0.9419772   |             |
| 0.4981985   | 0.6452703   | 1.02151     | 0.1229173   | 0.9370527   |             |             |
| AC016924.1  | 0.2048696   | 0.8039944   | 0.1939142   | 0.079615497 | 0.078672171 |             |
| 0.2312083   | 0.3349562   | 0.2045479   | 0.2633272   | 0.1456287   | 0.07080334  |             |
| 0.1269269   | 0.4350923   | 0.480594263 | 1.299006398 | 0.09017215  | 0.4390774   |             |
| 0.6443047   | 0.3309002   | 0.1082936   | 0.118613416 | 11.075970   | 0.4298579   |             |
| 0.02027387  | 0.2276008   | 0.02410256  | 0.5524292   | 0           | 1.3447250   | 0.025838412 |
| 0.1410614   | 0           | 0.1092716   | 0.1471205   | 0.06280533  | 0.202713513 | 0.1014007   |
| 0.1119384   | 0.1441514   | 0.2569788   | 0.03084281  | 0.02445754  | 0.0444475   |             |
| 0.08041132  | 0.03625196  | 0.1003958   | 0.6078950   | 0.09527625  | 0           | 0.02606086  |
| 0.4577585   | 0.2326765   | 0.024715142 | 0.05876892  | 0.1480690   | 0.4453128   |             |
| 0.03841485  | 0.05999685  | 0.06040898  | 0           | 0           | 0           | 0.09666968  |
| 0.170078725 | 0           | 0.06316124  | 0.3551611   | 0.1959602   | 0           | 0.0658185   |
| 0.1831203   | 0.031275172 | 1.2094020   | 0.08510115  | 0.1274527   | 0           | 0.07095677  |
| 0.3413222   | 0.04610774  | 0.02960002  | 0.03163359  | 0           | 0.2651003   | 0.03641146  |
| 0.4210899   | 0.6901482   | 2.4502580   | 0.6486868   | 2.025359184 | 0.8669550   | 0.06698126  |
| 0.02648287  | 0.136513326 | 0.07398957  | 0           | 0           | 0.4965516   | 0.03829707  |
| 0.3480442   | 1.0189040   | 0.2168635   | 0.4662544   | 0.1949448   | 0           | 8.3643160   |
|             |             |             |             |             |             | 0           |

|                    |                           |                    |                    |              |                   |                    |
|--------------------|---------------------------|--------------------|--------------------|--------------|-------------------|--------------------|
| 0.2340441          | 0.1324051                 | 0.1912084          | 0                  | 0.2165261    | 0.02929396        | 0.0607411          |
| 0.1034173          | 0.0704317                 | 0.06365454         | 0.2189886          | 0.1415205    | 0.3745033         |                    |
| 0.1948403          | 0.1687030.1144378         | 0.8366757          | 0.06085054         | 9.531936623  |                   |                    |
| 0.1097194          | 0.8460222                 | 0.02088732         | 0.02567241         | 0            | 0.1474206         | 0.3895114          |
| 0.04756256         | 0.4227166                 | 0.02801765         | 0.04233088         | 0.5265167    | 0                 | 0.1606228          |
| 0                  | 0.1124839                 | 0.0187779          | 0.1277572          | 0.08156606   | 0.3604585         | 0                  |
| 0.01911628         | 0.02812607                | 0                  | 0.066506401        | 0            | 0.3225088         | 3.994951053        |
| 0.1858329          | 0.1074007                 | 0.9365310.05353413 | 0.2224370          | 0            | 0.2247276         |                    |
| 0.09453407         | 0.5221481                 | 0.1716518          | 0.2204540.07596906 | 0.03106381   |                   |                    |
| 0.1830827          | 0.1057555                 | 0.034319269        | 0.4099011          | 0.6427143    | 0.1033834         |                    |
| 0.02525239         | 0.0741145                 | 0.02385651         | 0.1233183          | 0.03388532   | 0.07106752        |                    |
| 0.6431650.1203594  | 0.2040995                 | 0.02718987         | 0.3274967          | 0.04465993   |                   |                    |
| 0.6466541          | 0.3310069                 | 0                  | 0.025877429        | 0.0602629    | 0.04756793        | 0.03178997         |
| 0.1888786          | 0.20161                   | 0.1086695          | 0                  | 0.1072907    | 0.2032768         | 0.09315478         |
| 0.217135317        | 0.03223407                | 0.4202231          | 0.02927315         | 0.07793435   | 0.02464134        |                    |
| 0.01868452         | 0.07998134                | 0.1281606          | 0.7373296          | 0.3592639    | 0.03121811        |                    |
| 0.2811720.05674605 | 0.043884065               | 0.212441157        | 0.3683437          | 0.155199941  |                   |                    |
| 0.027778488        | 0.4500615                 | 0.09597618         | 0.0784431          | 0.07349489   | 0.1201769         |                    |
| 0.619728068        | 0.2640083                 | 0.06320992         | 0                  | 0.141060921  | 0.1774998         | 0                  |
| 0.1765581          | 0                         | 0.03784901         | 0.02728236         | 0.0526847    | 0.2007681         | 0.1683172          |
| 0.1021080.2023035  | 0                         | 0.1362288          | 0.026034343        | 0.2046833    | 1.145941          |                    |
| 0.1705542          | 0.1699211.3658060.2759791 | 0                  | 0.4225545          | 0            | 0.023935749       |                    |
| 0.06746768         | 0                         | 0.03029914         | 0.1114387          | 0.2441356    | 0.3050640.1511688 |                    |
| 0.2866221          | 0.03618109                | 0.1573221          | 0                  | 0            | 0.09275061        | 0                  |
| 0.1266738          | 0.05313228                | 0.07177535         | 0                  | 0            | 0.4745249         | 0.3699765          |
| 0.04058789         | 0.8384610                 | 0                  | 0.262134438        | 0.1090505    | 0.3863497         | 0.2340526          |
| 0                  | 0.05968502                | 0.02563252         | 0.6278710.4065244  | 0            | 0.1072852         | 0.06607667         |
| 0.1691306          | 0.0192753                 | 0.05186462         | 0.2981702          | 0            | 1.2620860         | 0.048623596        |
| 0.2062561          | 0.02740296                | 0.07281609         | 0.2739528          | 0            | 0.02699295        | 10.435990          |
| 0.02311659         | 0.09954848                | 0.1117027          | 0.080558408        | 0.1989406    | 0                 | 0.1527822          |
| 0.1915407          | 0                         | 0.267437656        | 0.1006337          | 0.03848778   | 0.3730023         | 0.3688502          |
| 0.1749107          | 0.03907093                | 0.122879347        | 0                  | 0.1938948    | 0.1981076         | 0                  |
| 0.040440224        | 0.08151081                | 0.5485025          | 0                  | 11.744423354 | 0.027127278       | 0                  |
| 0.01797969         | 0                         | 0.1704846          | 0.2042937          | 0.04998044   | 0.05881719        | 0.04929336         |
| 0.4794295          | 0.2813473                 | 0                  | 0.0234509          | 0.64883803   | 0.02850785        | 0.1007085          |
| 0.3914956          | 0.2380940.02517359        | 0.3488986          | 0.1046195          | 0            | 0.6896862         | 0                  |
| 0.2734439          | 0.02428459                | 0.01866881         | 0                  | 0            | 0.06400247        | 0.1264708          |
| 1.1917430.1951118  | 0.1971346                 | 0                  | 0.02276239         | 0            | 0.2193719         | 0.05925984         |
| 0                  | 0.1704714                 | 0.03210735         | 0                  | 0.4005333    | 0.09299728        | 0.4910186          |
| 0.1205169          | 0.3956561                 | 0.05980167         | 0.1900565          | 0.2193872    | 0.08082336        |                    |
| 0.02298717         | 0                         | 0.8800222          | 0                  | 0            | 0.5640552         | 0.6568560.05428305 |
| 0.02433482         | 0.039800238               | 0                  | 0.1032344          | 0.1627572    | 0.3991932         | 0.01975148         |
| 0                  | 1.030118841               | 0                  | 0                  | 0            | 1.6466630         | 0.9734459          |
| 0.04591019         | 0.1087621                 | 0.9098554          | 0.06847454         | 0.1447456    | 0.022162034       |                    |

|             |             |             |             |             |             |             |             |             |            |
|-------------|-------------|-------------|-------------|-------------|-------------|-------------|-------------|-------------|------------|
| 0.6888038   | 0.1148318   | 0.06071542  | 0.1626468   | 0.3555498   | 0.02089392  |             |             |             |            |
| 0.11478     | 0.2744506   | 0.1811622   | 0.3511719   |             |             |             |             |             |            |
| AC099811.5  | 0           | 0.07432706  | 0.08365856  | 0.193206105 | 0.07636676  | 0.2805412   |             |             |            |
| 0.08867472  | 0.1701890   | 0.03195133  | 0.8952875   | 0.1374570   | 0.246414861 | 0.09181356  |             |             |            |
| 0.311007277 | 0.033182639 | 0.6418847   | 0.08524214  | 0.4864409   | 0.3011283   |             |             |             |            |
| 0.03504006  | 0           | 0.06269036  | 0.03793285  | 0           | 0.04909581  | 0.02339626  |             |             |            |
| 0.05745437  | 0.09396459  | 0           | 0           | 0.0228213   | 0.038100098 | 0           | 0.1428093   |             |            |
| 0.06096488  | 0.059031957 | 0.04921462  | 0.07243876  | 0.1399272   | 0.06236208  | 0           |             |             |            |
| 0.07122252  | 0.08629001  | 0.1040733   | 0           | 0.02436345  | 0.0680863   | 0           |             |             |            |
| 0.03699371  | 0.2655779   | 0           | 0.03064444  | 0.0645309   | 0           | 0.02852338  |             |             |            |
| 0.1197750   | 0.08104937  | 0.05593371  | 0.0582387   | 0.05863875  | 0           | 0.02640478  |             |             |            |
| 0.05895732  | 0           | 0           | 0.066037893 | 0           | 0.1226207   | 0.02651949  | 0.054347936 | 0           |            |
| 0           | 0.04443853  | 0.121434736 | 0.01677089  | 0.03112563  | 0           | 0           | 0.07631229  | 0           |            |
| 0.05522001  | 0           | 0.08619787  | 0.06141319  | 0           | 0.01715545  | 0.01767223  | 0           | 0           |            |
| 0.08617592  | 0           | 0.05898024  | 0.04105121  | 0.01625461  | 0.1285341   | 0           |             |             |            |
| 0.1077321   | 0           | 0.1508594   | 0           | 0.01858741  | 0.04504602  | 0.03296819  | 0           | 0           |            |
| 0.1182701   | 0.099542907 | 5.2536050   | 0           | 0.0649102   | 0.06426256  | 0           |             |             |            |
| 0.07239639  | 0           | 0.02843553  | 0           | 0           | 0.1823140   | 0.0308946   | 0           | 0           | 0.02796376 |
| 0.08596852  | 0           | 0.05554214  | 0           | 0.08860106  | 0           | 0.03550141  | 0.1474003   | 0           |            |
| 0.04984022  | 0           | 0.09540039  | 0.03150809  | 0           | 0           | 0.02719662  | 0.04109042  | 0           |            |
| 0           | 0.06929597  | 0.0261407   | 0.02729692  | 0           | 7.6888290   | 0           | 0.03806044  | 0           |            |
| 0.02730187  | 0           | 0.032278748 | 0.1230760   | 0.02845982  | 0           | 0           | 0           | 0           | 0.05196536 |
| 0.06169107  | 0.05515457  | 0.024734723 | 0.03116317  | 0           | 0.03167794  | 0.05554056  |             |             |            |
| 0           | 0.1229048   | 0.03015352  | 0.02538824  | 0.3285005   | 0           | 0           | 0           | 0           | 0.06021229 |
| 0.02451239  | 0.07194265  | 0.02315742  | 0.2154683   | 0           | 0.06898496  | 0           |             |             |            |
| 0.04673293  | 0.03496209  | 0.1055724   | 0           | 0.02167561  | 0           | 0           | 0.03140462  |             |            |
| 0.025119116 | 0.05849695  | 0.0461740   | 0.03085839  | 0.04583593  | 0.02795743  |             |             |             |            |
| 0.02109701  | 0           | 0.02603666  | 0.02818857  | 0           | 0           | 0           | 0.04693423  | 0.1019772   |            |
| 0.05683067  | 0           | 0           | 0.1813699   | 0.02587919  | 0.0552911   | 0.03111839  | 0           |             |            |
| 0.06060659  | 0.05848553  | 0.1377079   | 0           | 0           | 0.03972775  | 0.075325979 |             |             |            |
| 0.026964466 | 0           | 0           | 0.05076293  | 0.1426824   | 0.03888508  | 0.126645798 |             |             |            |
| 0.03661026  | 0           | 0.08349491  | 0.034231817 | 0           | 0           | 0           | 0.03115907  | 0.07347977  |            |
| 0           | 0           | 0.03897695  | 0           | 0.1982316   | 0.03570458  | 0.052761095 | 0           | 0           |            |
| 0.1083738   | 0.05133973  | 0.03679028  | 0           | 0.06313247  | 0.02232432  | 0           | 0           |             |            |
| 0.08574027  | 0.116171677 | 0.0436604   | 0.06370401  | 0.04411688  | 0.02163462  |             |             |             |            |
| 0.04308753  | 0           | 0.08804339  | 0.08346686  | 0.2282855   | 0.06108476  | 0           | 0           | 0           |            |
| 0           | 0.021904486 | 0.03513193  | 0           | 0.06967204  | 0.03386772  | 0           | 0           | 0           | 0          |
| 0.05813505  | 0           | 0.025561748 | 0.031806605 | 0.1270259   | 0.09375703  | 0.02839924  |             |             |            |
| 0.05212851  | 0           | 0.1244069   | 0.01354382  | 0           | 1.4053540   | 0.03207018  | 0           |             |            |
| 0.01871046  | 0.1006896   | 0.1929551   | 0           | 0.1166764   | 0.02412917  | 0.117996823 |             |             |            |
| 0.1751854   | 0.02659994  | 0.03534114  | 0           | 0           | 0.02620195  | 0.9175881   |             |             |            |
| 0.03931586  | 0.04487836  | 0           | 0.1084294   | 0           | 0.02758726  | 0           | 0           | 0.02324097  |            |
| 0           | 0.01730671  | 0           | 0           | 0.0201151   | 0           | 0.05659505  | 0           | 0.047711395 |            |
| 0.04496987  | 0.1075502   | 0           | 0.01791319  | 0.058882743 | 0           | 0           | 0.03286874  |             |            |

|             |             |             |             |             |             |             |             |
|-------------|-------------|-------------|-------------|-------------|-------------|-------------|-------------|
| 0.10000232  | 0.052664679 | 0.06638568  | 0.1047169   | 0           | 0.0551629   | 0           | 0           |
| 0.0285468   | 0           | 0           | 0           | 0.04552738  | 0           | 0.02767246  | 8.8470350   |
| 0.1155585   | 0.0244359   | 0.09676413  | 0.02538842  | 0           | 0.03938092  | 0.09840451  |             |
| 0.04423848  | 0.09429181  | 0.05436523  | 0           | 0.09770377  | 0.01553173  | 0.02046078  |             |
| 0           | 0.02705631  | 0.07359912  | 0.06352398  | 0.02209536  | 0.03186144  | 0           |             |
| 0.02876165  | 0           | 0           | 0           | 0.04405378  | 0.06138886  | 0.02256802  | 0           |
| 0           | 0.03869949  | 0.1106923   | 0           | 0.1830614   | 0.02231356  | 0           | 0.05024906  |
| 0.02400973  | 0.0590712   | 0.0273763   | 0           | 0           | 0.02362172  | 0           | 0.01774015  |
| 0.05010462  | 0.1053252   | 0           | 0.03834537  | 0           | 0.095231639 | 0           | 0.126152865 |
| 0.03321534  | 0.05812396  | 0.8985373   | 0           | 0.01777668  | 0           | 0.02228242  | 0           |
| 0.04431197  | 0           | 0.021512597 | 0           | 0.08360005  | 0           | 0           | 0.09586965  |
| 0.03713883  | 0.1065632   | 0           | 0.120311    |             |             |             |             |
| SPAG5-AS1   | 0.2200704   | 0.07142956  | 0.2947901   | 0.033008772 | 0.150856709 |             |             |
| 0.3115434   | 0.1451861   | 0.2483605   | 0.06141155  | 0.06708666  | 0.1027433   |             |             |
| 0.124982453 | 0.3176438   | 0.293348389 | 0.070864619 | 0.6604786   | 0.358017    |             |             |
| 0.3932751   | 0.1243303   | 0.7745041   | 0.426204141 | 0.7765104   | 0.6359217   |             |             |
| 0.3278182   | 1.7352460   | 0.3047859   | 0.5276064   | 0.4575279   | 0.3046945   |             |             |
| 0.149977326 | 0.3070431   | 0.549222594 | 0.1540344   | 0.2338199   | 0.6184318   |             |             |
| 0.407620667 | 0.3205624   | 0.5105091   | 1.1455060   | 0.2130881   | 0.2046001   |             |             |
| 0.1825228   | 0.2119224   | 0.6223228   | 0.3006030   | 0.6815986   | 0.2471879   |             |             |
| 0.3064510   | 0.3041635   | 0.2174137   | 0.1998905   | 0.2715928   | 0.1998271   |             |             |
| 0.245926937 | 0.5421376   | 0.7059821   | 0.7500501   | 0.1791775   | 0.5845586   |             |             |
| 0.3318556   | 0.7149890   | 0.2086425   | 0.3714311   | 0.5277131   | 0.20849     | 0.662841362 |             |
| 0.08409959  | 0.8728933   | 0.2548568   | 0.197310642 | 0.2671119   | 0.163731    |             |             |
| 0.4555326   | 0.291752098 | 0.2972710   | 0.1794735   | 0.1470131   | 0.5152112   |             |             |
| 0.4834836   | 0.2647696   | 0.4304353   | 0.3345366   | 0.1104501   | 0.1606631   |             |             |
| 0.037492928 | 0.2308136   | 0.2792811   | 0.5431529   | 0.1967192   | 0.2870973   |             |             |
| 0.6435519   | 0.222525448 | 0.2016380   | 0.1457956   | 0.8179996   | 0.594286826 |             |             |
| 0.4754819   | 0.05824516  | 0.2255220   | 0.5947398   | 0.6827564   | 0.9138997   |             |             |
| 0.6054971   | 0.6237653   | 0.2899653   | 0.2071130   | 0.272106441 | 7.8664440   | 0.212538873 |             |
| 0.1866719   | 0.8247996   | 0.2607535   | 0.2378263   | 0.4445016   | 0.2842788   |             |             |
| 0.07287206  | 0.06925436  | 0.5359629   | 0.1898075   | 0.4948373   | 0.2814588   |             |             |
| 0.1760242   | 0.3702591   | 0.8812501   | 1.0281870   | 0.1126846   | 0.05420121  |             |             |
| 0.2018302   | 0.385557395 | 0.2388222   | 0.2428358   | 0.2468081   | 0.202233    |             |             |
| 0.198903469 | 0.1782694   | 0.2960693   | 0.6211658   | 0.2823622   | 0.3368694   |             |             |
| 0.9740519   | 0.4931851   | 0.3439698   | 0.2441802   | 0.3740336   | 0.1340788   |             |             |
| 0.3425559   | 1.8715510   | 0.3945373   | 0.2873979   | 0.4633052   | 0.2100298   |             |             |
| 0.09911966  | 0.3701817   | 0.144761977 | 0.0876134   | 0.6017081   | 0.200914081 |             |             |
| 0.5998641   | 0.2449073   | 0.2941575   | 0.2718933   | 0.2700814   | 0.2355755   |             |             |
| 0.121493605 | 0.3127938   | 0.4899256   | 0.3856118   | 0.5811991   | 0.2913399   |             |             |
| 0.4672047   | 0.4808209   | 0.1789225   | 0.2148476   | 0.21343274  | 0.6566094   |             |             |
| 0.2598091   | 0.3257587   | 0.2146289   | 0.7374731   | 0.1780374   | 1.600309    |             |             |
| 0.6181531   | 0.1571454   | 0.4869401   | 0.2594866   | 0.3086145   | 0.1521853   |             |             |
| 0.5554673   | 0.1573869   | 0.1414995   | 0.1309982   | 1.8711830   | 0.219941277 |             |             |

|             |             |             |             |             |             |             |
|-------------|-------------|-------------|-------------|-------------|-------------|-------------|
| 0.7058302   | 0.6606795   | 0.2240633   | 0.5530610   | 0.3761460   | 0.3018661   | 0.257921832 |
| 0.3503035   | 0.3431362   | 0.09269325  | 0.2813024   | 0.168796523 | 0.24724     |             |
| 0.7549771   | 0.3823066   | 0.5452611   | 0.4188707   | 0.8676242   | 0.1658023   |             |
| 0.1830229   | 0.5449410   | 0.3227286   | 0.4983094   | 0.4288278   | 0.4999498   |             |
| 0.418472035 | 0.236210796 | 0.4666327   | 0.289558169 | 0.120928777 | 0.3951456   |             |
| 0.179063772 | 0.2005566   | 0.2970937   | 1.0712510   | 0.31779509  | 0.7583909   |             |
| 0.2882768   | 0.4903557   | 0.372836703 | 0.2851684   | 0.4766882   | 0.4705804   |             |
| 0.3160797   | 0.1961536   | 0.5485994   | 0.2948832   | 0.6534254   | 0.1657386   |             |
| 0.2243713   | 0.3393146   | 0.478874008 | 0.3859520   | 0.145717648 | 0.5708910   | 0.3581599   |
| 0.2435641   | 0.4086079   | 0.4853710   | 0.3194270   | 0.6129640   | 0.2463639   | 0.7690467   |
| 0.352295533 | 0.9697050   | 0.4693582   | 0.3360360   | 0.2310137   | 0.1932366   | 0.2870128   |
| 0.5390046   | 0.8793729   | 0.2025103   | 0.8479393   | 0.2735339   | 0.1650389   |             |
| 0.0865229   | 0.1884714   | 0.491180247 | 0.5852146   | 0.3084027   | 0.5257287   |             |
| 0.3290909   | 0.5833640   | 0.1598505   | 0.2739163   | 0.3660054   | 0.9621843   |             |
| 0.4945256   | 0.371208564 | 0.135851941 | 0.5154236   | 0.2903290   | 0.1940775   |             |
| 0.8293735   | 0.3526241   | 0.1275276   | 0.1359432   | 0.1292186   | 0.3056844   |             |
| 0.1890431   | 0.0136350   | 0.3622966   | 0.3316508   | 0.5375799   | 0.6239972   | 0.1929802   |
| 0.4734294   | 0.1700493   | 0.584624258 | 1.33616     | 0.3067560   | 0.2000069   | 0.09465121  |
| 0.1565391   | 0.2350182   | 1.2149490   | 0.08396269  | 0.5654674   | 0.4058515   |             |
| 0.7371360   | 0.183698377 | 0.1885285   | 0.2876310   | 0.2407067   | 0.2680196   | 0.2847155   |
| 0.280896709 | 0.1216920   | 0.1436141   | 0.6787312   | 0.2710964   | 0.20144     | 0.323978    |
| 0.254730328 | 0.4033569   | 0.5053038   | 0.2926090   | 0.2180551   | 0.377248762 |             |
| 0.6167510   | 0.1624360   | 0.2807770   | 0.370178078 | 0.258681762 | 0.1049119   | 0.2758136   |
| 0.1468877   | 0.3180749   | 0.2904022   | 0.1243320   | 0.8047296   | 0.1634972   |             |
| 0.1609111   | 0.4212262   | 0.1392652   | 0.4618328   | 0.375686058 | 0.1477428   |             |
| 3.5073330   | 0.1623150   | 0.4030836   | 0.2817998   | 0.2841421   | 1.0626990   | 0.3394495   |
| 0.5466606   | 0.5744155   | 0.3448352   | 0.3523956   | 0.5263291   | 0.3107265   |             |
| 0.4312214   | 0.1359948   | 0.8477005   | 0.08719405  | 0.6760410   | 0.4086623   |             |
| 0.5494286   | 0.6181459   | 0.1633034   | 0.3694929   | 0.2026965   | 0.1588876   |             |
| 0.4452704   | 0.1464296   | 0.2352024   | 0.6423980   | 0.4530435   | 0.4546563   |             |
| 0.5871073   | 0.1688647   | 0.2768653   | 0.2521532   | 0.9020045   | 0.6255117   |             |
| 0.3430993   | 0.1025920   | 0.6438693   | 0.1897175   | 0.2312788   | 0.6197253   |             |
| 0.6808351   | 0.7370676   | 0.2471872   | 0.437283706 | 0.1894288   | 0.2835582   |             |
| 0.93909     | 0.03310129  | 0.2047253   | 0.16855952  | 0.172869636 | 0.1587677   |             |
| 0.235734803 | 0.1702427   | 0.9806201   | 0.4797275   | 1.2948610   | 0.1974115   |             |
| 0.2150212   | 0.1998620   | 0.1954031   | 0.2829211   | 0.2223860   | 0.3450681   | 0.215928134 |
| 0.06425543  | 0.6427285   | 0.2769003   | 0.1264383   | 0.3521504   | 0.4764468   |             |
| 0.3965672   | 1.0809850   | 0.2315901   | 0.6851609   |             |             |             |
| TGFB2-AS1   | 0.1329128   | 0.9835992   | 0           | 3.124943985 | 0.140359911 | 0.2062507   |
| 0.4780793   | 0.2502420   | 0.4698051   | 2.0323520   | 1.856904087 | 0.5670023   |             |
| 0.152432651 | 0.195163959 | 0.6435086   | 0.08355872  | 0           | 0.1475907   | 0.1288053   |
| 0.112863754 | 0.1843569   | 0.0278878   | 0.4051134   | 0.1082840   | 0.03440132  |             |
| 0.05631972  | 0.05526535  | 0.3570811   | 1.36451864  | 0.4026709   | 0.42016131  | 0           |
| 1.8198570   | 0.057866156 | 0.1085461   | 0           | 0           | 2.4757860   | 0.5722809   |
|             |             |             |             |             |             | 0.9774236   |

0 0.2677971 0.2587102 0.2507642 7.9088890.04219891 0 0.2603330  
0.3604710.1423271 0.105826953 0.2097006 0.07044574 0 0.02741455  
0.19981 0.7328791 0 0.2717749 0.6935159 0 0.04221983 0  
0.4454108 0.1802987 0.03899365 0.599339672 0.08173742 0 0.1306828  
1.785548447 2.3919740.04576641 0.4048798 0.04547795 0.03740261 0 0  
0 0.7182124 0.1580259 0.309771017 0.1513499 0.9094694 1.3689830  
2.9396970 0.02890773 0.7243290.0239004 0.07559742 0 0.4752203  
0.08911638 0 0.03937348 0.3279660.1324693 0.1454270.07738173 0  
0.03478033 0.526916171 0.08778159 0.107074473 0.05842067 0 0.1259869  
0.4366554 0.2129 0 0.4181094 0 0.03690158 0.1340352 0 0  
0.2019906 0.1233518 4.3736520.09631518 0.3675055 0.03731806  
0.08685131 0.442433455 0.02610023 0.3096201 0.5366204 0.03664196  
0.068473501 0.2805491 0.09265755 0 1.0390830.07997858 0 0  
0.09666391 0.2547280.03843669 0.2408206 0.08040448 10.454530  
0.03957527 0.7834847 0 0.04014404 0 0.094923858 0.06032269 0.12554  
0.539829575 0.3410193 4.2155270 0.07640867 0.6349639 4.784783  
1.672990929 0 0 0.09315703 0.05444371 0.03933145 0.1445731  
0.2364642 0.1866514 2.0830224.50648351 0.3191168 0.04586695  
0.7673013 0.07208492 0.1586742 0.06810027 0.03520218 0.04836415  
0.0676226 0 0.3092176 0.1713582 0 0 0.1274853 0.05127568  
0.1717973 0 0.443214852 0.08601257 0.03394659 0.09074694 0.03369805  
0.1233239 0 0.033505986 0.3445534 0 0.2659176 1.4810780.077478715  
0.8051285 0.0999633 0.04178125 0.02780871 0 0 0.1141565  
0.1422728 0 0.2848742 0.08911453 0.1146610.04049651 0.626352453  
1.350684716 0.4089034 0.443030352 0.356831386 0.03778634 0 0.4105236  
0.3671446 0.05717573 0 0.05383089 0.09021882 0.03069225 0.956339859  
0.1266718 0.1969227 0 0.9163116 0.4861934 0.6619767 0  
0.05731081 0 0 0.2362464 0.193946755 0 1.969402251 1.965321  
0.1258146 1.4876280.09701053 0 0 0 0 0.307469095 0.1604931  
0 0.5838160 0.03167745 0 0.8630465 0.04090925 1.0069970  
0.0856049 1.91997 0.7281006 0.0381660 0.3357717 0 0.03414805  
0.09959664 3.2041890.04233026 0 0.2027573 0.1282207 0.2154973  
0.375854062 0.60798012 0.06225864 0.1378582 0.5846063 0 0.1703756  
0.4024351 0.9758115 0.2707730.03826668 0.3062541 0.4243973  
0.1072881 0.05502285 0.1480516 0.04053096 0.1245645 0.1143722  
0.1773949 0.069399927 0.03679838 0 0.4417008 0 0 1.309909  
0.7555523 0.05780914 0.2639525 0.09472297 0.2125761 0.057490067  
0.1622547 0.06188649 0.1308386 1.4694391.5374860.890658621 0.5745336  
0.1098664 0 2.1058230.2219095 0 0.280614954 0.06612267 0.03953484  
0.1413784 0.05267827 0.34631933 0 0.3355164 0.1449883 0.147041113  
0.619495469 0.4880599 0.7185420 0.04055513 0.04165516 0.4993557  
0.04197456 0.3166014 0.6516994 0.1338546 0 0 0.127735092  
0.1220668 0.07187004 0.2793887 0 0.2874399 0.5335491 0 2.045  
0.0579048 0.09646115 0 0.03466113 0.2931037 0 0.04788713



|             |             |             |             |             |             |             |            |            |   |
|-------------|-------------|-------------|-------------|-------------|-------------|-------------|------------|------------|---|
| 0.5709376   | 0.1203402   | 0.6003396   | 0           | 0.3246554   | 0.7005315   | 0.1299541   |            |            |   |
| 0.1873933   | 0           | 0.2960332   | 1.2226580   | 0.6873971   | 1.1659620   | 0.06017651  |            |            |   |
| 0.0331835   | 0.09344339  | 0.1433437   | 3.8533540   | 0.02845142  | 1.0308090   | 0.1565645   |            |            |   |
| 0.07690553  | 0           | 0.2522701   | 0.03694253  | 3.1773010   | 0.08685694  | 0           | 0          |            |   |
| 0.1162164   | 0.06946566  | 0.68167732  | 0.1304236   | 0.03683634  | 0.2710185   | 0           |            |            |   |
| 0.7047768   | 0.033158541 | 0.280052827 | 0.6882680   | 0.092746137 | 0.04883907  |             |            |            |   |
| 0.04273206  | 15.854260   | 0.7641638   | 0.1306921   | 1.8700321   | 0.6054140   | 0.03607296  |            |            |   |
| 2.8016780   | 0.1032969   | 0.094894885 | 0           | 0.08194906  | 0.1733169   | 0           | 0.02819291 |            |   |
| 1.0437580   | 0.3003445   | 0.03917203  | 0.3878563   | 0.1474188   |             |             |            |            |   |
| CDC42-IT1   | 0.02139666  | 0           | 0.1485181   | 0           | 0.045191023 | 0.1328111   | 0          | 0          | 0 |
| 0           | 0           | 0           | 0.2390602   | 0           | 0.039272516 | 0.03453124  | 0.1345151  | 0.04112253 |   |
| 0           | 0.2280895   | 0.090845536 | 0.1483913   | 0.1122363   | 0.1164576   | 0.2614778   |            |            |   |
| 0.1661405   | 0.09066499  | 0.2224191   | 0.03592742  | 0.059368605 | 0           | 0.157823598 |            |            |   |
| 0.02510719  | 0.2816975   | 0.07215352  | 0.232886189 | 0.05824679  | 0           | 0.22081     | 0          |            |   |
| 0           | 0.1123916   | 0.2553162   | 0.1231734   | 0.1249435   | 0.1730087   | 0.02686063  |            |            |   |
| 0           | 0.02189151  | 0           | 0.02993986  | 0.01813424  | 0.0381870   | 0.056787681 | 0.06751632 |            |   |
| 0.1134054   | 0.1278987   | 0.0661990   | 0.1608297   | 0           | 0.04127503  | 0.1875045   |            |            |   |
| 0.03488876  | 0.07403892  | 0.2038998   | 0.078157564 | 0.03585171  | 0.3386246   |             |            |            |   |
| 0.3766381   | 0.096483294 | 0.06579154  | 0.1512304   | 0.1314854   | 0.071860584 |             |            |            |   |
| 0.07939512  | 0.07367598  | 0           | 0.4392697   | 0.1806352   | 0.2037956   | 0.09803149  |            |            |   |
| 0.2648530   | 0.03400581  | 0.05451308  | 0           | 0.02030393  | 0           | 0.02687592  | 0.06607271 |            |   |
| 0.04079658  | 0.07984713  | 0.162877512 | 0.02429259  | 0.0384755   | 0.4259456   |             |            |            |   |
| 0.156832506 | 0.2550074   | 0           | 0.1785460   | 0.03169224  | 0           | 0.1066263   | 0.1170561  |            |   |
| 0.1557140   | 0.09739156  | 0.08398545  | 0.047124648 | 17.169550   | 0.057457111 | 0.04702357  |            |            |   |
| 0.1920573   | 0.07605641  | 0.04393372  | 0.1285245   | 0           | 0           | 0           | 0.1485129  |            |   |
| 0.08091503  | 0           | 0.05031673  | 0.06503397  | 0.2978625   | 0.02034919  | 0.1550507   |            |            |   |
| 0           | 0           | 0.2097233   | 0.044515071 | 0.08403368  | 0.2242956   | 0.07198882  |            |            |   |
| 0.0294936   | 0           | 0.08468163  | 0.1118719   | 0           | 0.02697974  | 0           | 0.04863158 |            |   |
| 0.04480634  | 0.03890303  | 0.06151019  | 0.06187641  | 0.03230661  | 0.08629152  |             |            |            |   |
| 7.19188     | 0.06247112  | 0.06370931  | 0.09009104  | 0           | 0.09693741  | 0.1043142   |            |            |   |
| 0.152810951 | 0.1942182   | 0.2020976   | 0.08147175  | 0.30499     | 0           | 0.09781163  | 0          |            |   |
| 0.1095195   | 0           | 0.029274188 | 0.03688243  | 0.07240326  | 0.07498333  | 0.1314674   |            |            |   |
| 0.09497521  | 0           | 0.1308541   | 0           | 0           | 0.078854967 | 0.2568613   | 0          | 0.1187714  |   |
| 0.02901106  | 0.08514599  | 0.05481481  | 0.4250205   | 0.2335737   | 0.02721516  | 0           |            |            |   |
| 0.05530964  | 0.1241356   | 0.03123692  | 0.03420387  | 0.02565364  | 0.2476349   |             |            |            |   |
| 0.1382819   | 0.2973455   | 0.089187382 | 0.4846286   | 0.02732406  | 0.07304342  |             |            |            |   |
| 0.1084960   | 0.1997509   | 0.026969414 | 0.03081507  | 0.2668953   | 0.06421218  |             |            |            |   |
| 0.1375546   | 0.187090943 | 0.05554788  | 0.1206927   | 0.06726057  | 0.1790688   |             |            |            |   |
| 0.08492717  | 0.2146559   | 0.06125739  | 0.03271923  | 0.2209765   | 0.0458598   |             |            |            |   |
| 0.07172947  | 0           | 0.1955771   | 0           | 0.044374861 | 0.5172071   | 0           | 0          | 0          | 0 |
| 0.09011888  | 0           | 0.2531183   | 0.074944298 | 0.4766212   | 0.2420611   | 0.2964552   |            |            |   |
| 0.081028491 | 0.2039196   | 0.05283523  | 0.05795362  | 0.1475103   | 0.1304478   |             |            |            |   |
| 0.06268634  | 0.0605265   | 0.1845209   | 0           | 0.04692244  | 0.1056433   | 0.031222064 |            |            |   |
| 0.1043371   | 0.059818795 | 0.0427544   | 0.1417778   | 0.1088556   | 0.03904253  |             |            |            |   |

|             |             |             |             |            |             |
|-------------|-------------|-------------|-------------|------------|-------------|
| 0.03735946  | 0.2642141   | 0.3123669   | 0.06068115  | 0.3044275  | 0.054996881 |
| 0.2325295   | 0.1507907   | 0.03480898  | 0.1536308   | 0          | 0.0269593   |
| 0.06946776  | 0.2634272   | 0.02078322  | 0.2168862   | 0          | 0           |
| 0           | 0           | 0           | 0.07265054  | 0          | 0.03036038  |
| 0           | 0.150575779 | 0.07516921  | 0           | 0          | 0.3701727   |
| 0.06856878  | 0.02944776  | 0           | 0.03113554  | 0.8008353  | 0           |
| 0.1518236   | 0           | 0.1992988   | 0.05958436  | 0.09787174 | 0.06684241  |
| 0.09205971  | 0.08567251  | 0.055860924 | 0.3258145   | 0.09444518 | 0.02091358  |
| 0           | 0           | 0.06202138  | 1.7375830   | 0.07967207 | 0.3430970   |
| 0.3635988   | 0.138823557 | 0.03265024  | 0.04981326  | 0.03510459 | 0.1100252   |
| 0.1237543   | 0.040965884 | 0.03853748  | 0           | 0.7142023  | 0.07704569  |
| 0.04465448  | 0.0897728   | 0.056467677 | 0.02661151  | 0.1272885  | 0.08534801  |
| 0.02120072  | 0.162608269 | 0.1404648   | 0.04501027  | 0          | 0           |
| 0.124660035 | 0.01571383  | 0.1032793   | 0.09392748  | 0.06528673 | 0.2347015   |
| 0.1148394   | 0.2702871   | 0.05663038  | 0.02622808  | 0.1436552  | 0.05936884  |
| 0.05388284  | 0.051407837 | 0.06550215  | 13.016060   | 0.07496122 | 0.2279441   |
| 0.02892053  | 0.08589215  | 0.03004786  | 0           | 0.04660834 | 0.3105714   |
| 0.2356083   | 0.2231936   | 0.1286853   | 0           | 0.1541799  | 0.01838221  |
| 0.04843173  | 0.04026845  | 0.3202185   | 0.1045278   | 0          | 0.1569026   |
| 0           | 0.09450903  | 0           | 0.0517965   | 0.07833801 | 0           |
| 0           | 0.04843687  | 0.1335492   | 0.4888899   | 0.2538343  | 0.02673807  |
| 0           | 0           | 0.1260208   | 0.6809251   | 0          | 0           |
| 0.1784132   | 0           | 0.0699123   | 0.1620028   | 0.2515417  | 0.2494510   |
| 0.08387075  | 0           | 0.0629878   | 0           | 0.06232754 | 0           |
| 0           | 0.026689751 | 0           | 0           | 0.1572449  | 0.1719780   |
| 0.09319479  | 0.1472742   | 0.06271724  | 0.1582309   | 0          | 0.05807121  |
| 0.07866656  | 0.1940051   | 0.050921436 | 0.03956641  | 0.1649047  | 0.1046288   |
| 0           | 0.1361571   | 0.1680270   | 0.04395478  | 0.3153009  | 0.1040636   |
| 0.4034417   | SBF2-AS1    | 0.6589762   | 0.6275656   | 0.6589768  | 0.564985758 |
| 0.314530431 | 0.3813019   | 0.6634885   | 0.6717479   | 0.8751227  | 0.3913824   |
| 0.7359845   | 0.907070947 | 0.5710078   | 0.459003573 | 0.50567438 | 0.1081522   |
| 0.7840905   | 0.4293204   | 0.4258198   | 0.5267639   | 0.21339678 | 0.6777794   |
| 0.7850726   | 1.33335     | 1.2537020   | 0.9877081   | 0.6783574  | 1.8499092   |
| 0.6443371   | 1.224124807 | 0.5592623   | 1.388761493 | 0.5373457  | 1.48517     |
| 0.4708031   | 0.737506116 | 1.4543681   | 0.6334796   | 0.1377631  | 0.2970911   |
| 0.07279     | 0.7089121   | 0.8529628   | 0.7876346   | 0.5000255  | 0.7576072   |
| 0.3365111   | 0.95627     | 0.6323162   | 0.4922239   | 0.776223   | 0.4007317   |
| 2.2724390   | 0.494054251 | 0.6989985   | 0.3551868   | 0.5841791  | 1.8775420   |
| 0.3757912   | 0.5434074   | 0.3375482   | 1.9575520   | 0.4492290  | 0.605492    |
| 1.9158481   | 0.427942828 | 1.1790230   | 0.3408992   | 1.7476060  | 0.279802361 |
| 0.7212089   | 0.6578540   | 0.6405986   | 0.925279556 | 0.2935643  | 0.4679175   |
| 1.3098990   | 0.535032    | 0.5867047   | 0.6666583   | 0.2558629  | 0.4608455   |
| 0.5443665   | 2.086767    | 0.433850783 | 0.7101116   | 2.0780490  | 0.4162017   |
| 0.6840528   | 4.4117960   | 0.4214344   | 1.186263619 | 1.7795340  | 0.5790965   |
| 1.4505320   | 0.55487501  | 0.6211998   | 0.4618052   | 0.5980417  | 1.34553     |
| 1.0220180   | 0.5983351   | 0.5072190   | 0.2546865   | 0.4109449  | 0.5942828   |
| 0.578079726 | 2.4342671   | 0.794563134 | 0.9818550   | 0.5547398  | 0.5514105   |
| 0.37458     | 2.91096     | 0.7646742   | 0.5445936   | 1.0017240  | 0.8889411   |
| 1.605035    | 1.1642920   | 0.6303699   | 2.5630610   | 0.4031084  | 1.5473171   |
| 1.1735820   | 0.9722318   |             |             |            |             |

0.3815413 0.6325273 0.642888518 0.4276906 1.7388940.8434234  
0.4670030.824746709 1.1443910.5061101 0.6940641 1.2393451.613005  
0.3723244 0.5418446 0.6972222 0.5494106 0.7375070.7701273  
1.00974310.555950.3097952 0.5043881 0.5643319 0.2522079 0.8489803  
3.2792310.452016098 1.2250350.5509197 3.510953758 1.1303572.082526  
1.2650990.4066548 0.7304971.6696570.47881 0.26312 0.9448652 0.7306397  
2.2456010.3525491.2705760.8817687 2.2638560.4820023 1.769983709  
0.6629610.3147716 0.8514505 1.0752110.7666993 1.6643470.4634437  
1.1582950.9470904 4.4607611.6456881.3511790.7011459 0.2678171  
0.6026059 0.5745146 1.5158510.7243358 0.817315528 0.9938378  
2.1014450.4130617 0.4483611 0.8290641 0.6082433 0.427034934  
2.2412480.9752382 0.6070637 2.06635 0.900658405 0.3962797 0.5110143  
0.5851687 1.3242180.5073564 0.6648343 0.7407877 1.0276161.057376  
0.9016981.3479440.7266647 0.3346334 0.359668367 0.853197911 1.562628  
1.535706732 0.349832933 0.6350614 0.581962679 1.2335510.5656260.5845668  
0.423811229 0.7765481 2.4471 0.3352918 0.909385386 0.5056201  
0.2666074 1.2857050.9689241.2710871.0907450.4949872 0.7545082  
0.3953464 2.1023660.6323401 0.92355133 0.4538677 1.483211296  
1.3948660.5392027 1.5683090.4483657 0.8450735 0.3539951 0.4008459  
0.4856933 0.8063294 0.559814866 0.7687448 1.0626254.9241630.8286869  
0.62556 0.5019297 0.4774533 0.4812829 0.5677575 1.9120740.2877461  
1.3006080.3800863 2.5390420.897665321 1.47953 0.6585089 1.544785  
0.5265762 1.1819550.7173579 1.0565440.4868098 2.4542580.6519213  
0.479027277 2.973729654 1.0419991.4673910.5672922 0.8641707 0.9902731  
1.12214 0.4713637 1.1214431.0611710.4825408 0.6472258 1.100674  
1.4179490.5391208 0.4200667 0.2209817 0.4445116 1.2521930.476271611  
0.7524560.8983651 0.7387116 0.3103236 0.7416231 0.8903195 1.16401  
0.9068055 2.4445050.8026206 0.7108163 0.36233053 0.7442317  
1.1007770.3787094 1.1151630.4468161.32225965 0.3989797 2.688943  
0.9320367 1.2065392.0939881.4214670.741818013 0.3472812 0.5260212  
0.7078784 0.7304094 0.905405461 0.3666142 0.7753492 0.6904171  
1.599458774 0.477199993 1.2768781.9767710.6700806 0.6702355 0.7117512  
0.4695799 0.8112691.0642010.5476438 1.0560840.7885392 1.092262  
0.532226872 1.4645672.1641432.2499680.2697042 0.6290233 1.72867  
0.3293856 1.1006451.4435580.3309925 0.7014864 1.1019662.25779  
0.1797791 0.8987175 0.4190053 0.6025409 1.9969180.7689109  
0.6487012 0.5167293 0.6188258 0.4789792 0.3288924 1.1312940.67144  
0.6610964 1.7778532.29526 0.5562507 0.3439169 0.8441272 0.5099316  
0.8700058 0.3387057 0.5622844 0.6212844 0.8455257 1.116615  
1.0599530.9675376 8.4302392.2139890.6257864 1.6944620.2984066  
0.4134842.514110057 0.5553021 0.4385256 1.1170370.6942468 0.7304373  
1.119211235 0.642274787 0.4025933 0.766385791 0.5677343 0.5266671  
4.3484280.5578283 0.4502815 0.9876112 2.2576450.4420767 0.5633214  
0.5338328 0.6028032 1.337913679 0.9500713 0.6656893 0.3216299

1.8532410.5646451.2989480.6998060.4169551 0.7423917 0.5987566  
AL133415.1 0.1048618 0.0431118 0.2911460.134478017 0.022147442 0.8136094  
0.2743139 0.3619529 0.1853268 0.5101817 0 0.0714638 0.08520714  
0.180393031 0.307949929 0.06769297 0.09888571 0 0.06986517 0.02032423  
0 0.03636218 0.04400425 0.06848893 0.02847696 0.1085639 0.0888671  
0.06540255 0.07042995 0.640104564 0.6883239 0.022099136 0.02460932  
0.05522228 0.6011430.022826805 0.2283670 0 0.2893742 0.1389237  
0.02754072 0.1001013 0.3018272 0.04082197 0.02826299 2.053583  
0.06658581 0 0.05134756 0 0.01777464 0.1122893 0.139153949  
0.06617747 0.0555783 0 0.02162876 0.1351204 0.1360485 0  
0.03063104 0.06839383 0.1088561 0.1332376 0 0.07028153 0.04741566  
0.06152823 0.283710083 0.06448689 0 0 0.21130676 0.3112828 0  
0.1277723 0.03587991 0.08852658 0 0 0.1038404 0.1333259  
0.05343208 0.081464805 0.0199013 0.1845071 0.1053719 0.03238124  
0.1199627 0.05217584 0.022806807 0.02381086 0.01885627 0 0  
0.1249753 0.3515426 0 0.03106378 0.06468734 0.1828958 0.03824497  
0.06105046 0 0.10976 0.09238033 0.1385109 0.028158867 0.04609109  
0.03764976 0.1739458 0.04306251 0.02099598 0 0 0 0.1746814  
0.5287365 0.03583949 0 0.03187217 0.06487908 0.2592937 0.01899701  
0.1288641 0 0.1713037 0.218161681 0.02059182 0.4152680.2352043  
0.02890874 0.43217836 0.08300239 0.1462047 0 0.1322237 0.06309925  
0.04766721 0.02195891 0.03813159 0.04019362 0.0303247 0.09499792  
0.08458035 3.4527010 0.06244596 0.5298272 0.04305224 0.03167171  
0.1363275 0.037445176 0.1427751 0 0.133093605 0.0298942 0.1814099  
0.03195734 0.2109897 0 0 0 0 0 0.04295347 0.1241225  
0.5132753 0.1049394 0.08835538 0.1190872 0.42510199 0.04196129 0  
0.02328322 0.1137431 0.08345755 0.1611835 0.05554565 0 0.1867284  
0.03148886 0.2168514 0.1081547 0.03061749 0 0.8549277 0 0  
0.03643114 0.029139598 0.03392989 0 0.03579748 0.1063445 0.2594577  
0.02447373 0.052869219 0 0.03270034 0.1048981 0 0.2445079  
0.1270415 0.1182993 0.2307438 0 0 0 0.03002133 0.03207041 0  
0.1348512 0 0.1130776 0 0.444745729 0.021747453 0 0.116509871  
0.062560618 0.05962321 0 0.05888788 0.1241397 0.09021779 0.146916301  
0 0 0.02421471 0.119132541 0.1998759 0 0.1136088 0.1988046 0  
0 0 0.02260773 0.6159907 0.02299599 0.06212901 0.275426369  
0.05113404 0.029316293 0.3352526 0.01985233 0.0426788 0.03826832 0  
0 0 0.08921676 0 0.242578309 0.3038913 0.1478005 0.05117808  
0.05019476 0.3248958 0.1056988 0.06809021 0 0.3259373 0.1062927  
0 0.03091355 0.05222148 0.1505557 0 0.04075503 0.05983025  
0.3771764 0.1375097 0.1780247 0 0.05951666 0.09140899 0.03371998  
0.0340034 0.088959226 0 0.04911907 0.1087635 0.1647237 0.3023602  
0 0.05772762 0.8641379 0.09155437 0.4226679 0.3624296 0.1116097  
0.04232257 0 0.2336112 0.06395396 0.1965508 0.02255854 0.139956  
0.383272399 0.08709644 0.03085744 0.02049886 0.03427643 0 0.3039575

|             |             |             |             |             |             |             |
|-------------|-------------|-------------|-------------|-------------|-------------|-------------|
| 0.2128908   | 0.1824345   | 0.02603072  | 0           | 0.04192807  | 0           | 0.2240195   |
| 0.09765092  | 0.8258031   | 0.1617651   | 0.3032505   | 0.020076765 | 0.01888664  |             |
| 0.3033775   | 0.04666931  | 0.1510358   | 0.1094224   | 0           | 0.276739606 | 0.4434246   |
| 0.03119109  | 0.05577037  | 0.3324850   | 0.045538212 | 0           | 0.04411772  | 0.0381296   |
| 0.386694522 | 0           | 0.3234468   | 0           | 0.0306883   | 0.03199605  | 0.03286391  |
| 0.1688433   | 0           | 0.0832611   | 0.1028319   | 0.03520162  | 0.03879437  | 0           |
| 0.025194209 | 0.03210162  | 0.1701060   | 0.04468479  | 0           | 0.08418891  | 0.02945201  |
| 0.2996327   | 0           | 0           | 0.02734596  | 0           | 0.05626232  | 0           |
| 0.7747608   |             |             |             |             |             |             |
| 0.04747133  | 0           | 0           | 0.01707583  | 0.07369141  | 0.02563188  | 0.3326497   |
| 0.06175661  | 0.06673028  | 0.4569244   | 0.03839228  | 0           | 0.2044195   | 0.04747637  |
| 0.05236037  | 0.03686117  | 0.04523651  | 0.1310393   | 0.0673404   | 0.4280309   | 0           |
| 0           | 0.05176998  | 0.07961157  | 0           | 0.3063791   | 0.02284198  | 0           |
| 0.03522194  |             |             |             |             |             |             |
| 0.09168915  | 0.3836354   | 0           | 0.3292733   | 0.0290621   | 0.1221832   | 0           |
| 0.1112070   | 0.026160492 | 0.497133435 | 0.2874760   | 0.036586118 | 0.03853168  | 0           |
| 5.7329480   | 0.09134673  | 0.1031098   | 0.09221033  | 0.1033955   | 0           | 0.01422991  |
| 0.4626396   | 0           | 0.174690819 | 0.0775636   | 0.09698079  | 0           | 0.2289381   |
| 0.1112142   | 0.09411143  | 0           | 0.09271453  | 0.06799999  | 0.1395676   |             |
| AC106782.5  | 0.6940541   | 0.2377885   | 0.6356498   | 0.123621719 | 0.335931708 |             |
| 1.1218910   | 0.4728164   | 0.7259623   | 0.1022193   | 0.2009979   | 0.2198776   |             |
| 0.197083761 | 0.9399413   | 0.746235233 | 0.424634082 | 2.3335571   | 3.1809      | 0.6113763   |
| 1.2845      | 2.8865960   | 0.306958549 | 0.9025208   | 3.5193090   | 0.6610787   | 2.316757    |
| 0.9356219   | 1.1334895   | 1.104260    | 0.9711630   | 0.601802853 | 0.6570929   | 1.249378105 |
| 1.1537542   | 0.0559520   | 0.4875999   | 3.462362644 | 1.5744832   | 1.1436641   | 1.7160211   |
| 1.695834    |             |             |             |             |             |             |
| 0.7183605   | 0.1898804   | 1.3803031   | 1.8728610   | 0.4503174   | 1.2081321   | 1.270634    |
| 0.5968013   | 0.8876323   | 0.9204451   | 1.0521051   | 0.0048921   | 3.935270    | 0.959401249 |
| 1.9163031   | 3.028343    | 6.733410    | 0.5368325   | 1.0868572   | 3.449772    | 4.545741    |
| 1.90068     |             |             |             |             |             |             |
| 0.1414631   | 1.1507851   | 0.1014720   | 0.369721916 | 3.3919073   | 6.940691    | 7.392540    |
| 0.478145074 |             |             |             |             |             |             |
| 0.5779889   | 0.6131919   | 1.2084330   | 0.485620354 | 1.9851881   | 4.936650    | 7.487904    |
| 0.9400257   | 3.4586462   | 4.789832    | 1.1640961   | 1.1454890   | 0.1838439   | 0.8104562   |
| 0.112332328 | 0.4665144   | 0.5936420   | 0.4358939   | 1.5627754   | 4.4938390   | 0.9712655   |
| 2.421530516 | 1.8058120   | 3.900154    | 1.3569891   | 9.07720406  | 1.3211910   | 0.04847443  |
| 0.7842774   | 3.0412170   | 0.9217103   | 1.2249531   | 3.184061    | 3.048341    | 4.479391    |
| 1.21079     |             |             |             |             |             |             |
| 0.605073116 | 1.5279481   | 6.30794408  | 3.7497621   | 3.498030    | 0.6167699   | 1.840754    |
| 1.5923320   | 0.7844843   | 0.1364572   | 2.3107121   | 1.4050711   | 0.0936170   | 0.9389666   |
| 0.9520870   | 0.7031798   | 2.05763     | 0.4950578   | 2.2003880   | 0.4886515   | 2.029899    |
| 0.7558778   | 1.504122526 | 2.6690540   | 0.9094485   | 0.5513518   | 0.9168361   |             |
| 0.595933442 | 0.8393185   | 1.2096150   | 0.7385202   | 1.0939440   | 0.8700795   | 0.7230148   |
| 2.2103881   | 2.619171    | 9.675250    | 0.5435939   | 0.3056509   | 0.2624139   | 0.7273675   |
| 0.6332522   | 1.2916071   | 2.785190    | 0.9201574   | 1.13548     | 0.5639487   | 1.394101465 |
| 1.4437392   | 4.128041    | 6.8841716   | 2.0610650   | 0.7504416   | 0.8813235   | 0.8728049   |
| 2.6150630   | 0.7940319   | 0.870449679 | 0.4984890   | 0.8807178   | 1.4694980   | 0.9772753   |
| 1.4548030   | 0.8257183   | 0.8521314   | 0.8934478   | 0.5911565   | 0.746041916 |             |
| 1.5043780   | 0.2993894   | 3.0179060   | 0.1960513   | 1.8125121   | 7.0397      | 1.5318450   |
| 0.9996832   |             |             |             |             |             |             |
| 1.6552351   | 1.8670681   | 5.324661    | 5.099940    | 0.7599357   | 1.4330891   | 2.4821      |
| 0.2231293   |             |             |             |             |             |             |

1.4484493.1648130.723253923 1.6375151.5879980.1974455 3.0794220.8049775  
1.6198550.400959333 1.4576971.26254 0.3760760.3718272 0.674306942  
1.6516822.0118590.8181618 0.8168266 1.1478440.9864111 0.3311728  
0.7738865 3.3350771.30163 0.7271015 1.6527872.4671230.340701481  
0.449815482 3.43164 1.00410118 0.345060906 1.2332220.198700684 0.9744104  
0.6276492 3.1722481.519378538 2.6352950.8506178 2.8047441.478453448  
1.2402452.1423040.7049515 1.2211372.1157011.0166941.22708 1.527523  
0.5227037 4.3441751.3136081.139361423 1.3396723.274377997 1.386846  
1.5055980.7650509 1.0553681.8177714.5351942.0053711.02518 1.325792  
0.854814796 1.6063111.2737690.7056977 1.4880981.3095411.3117381.03279  
1.5576680.3932574 1.7099561.1175453.4101511.4401710.3321635 1.927124136  
1.6297241.4025051.3745260.4604886 1.66926 0.4144562 2.6261730.9138221  
1.9063641.1721870.81777622 1.475466178 0.9482283 3.8243531.18112  
1.4592420.3706999 0.2786034 0.6716094 0.2524898 0.2914097  
0.7496346 2.3084890.5544091 2.06513 0.8053198 0.3086528 0.3161959  
1.4308810.3859725 0.528496707 2.76225 0.7233419 0.3674581 0.1890559  
0.3058734 2.17947 0 0.2515601 1.1127122.4216332.2836880.875600662  
0.6178037 0.3366287 0.2846763 0.4832942 0.5017848 0.968939164  
1.0938020.5378517 2.4453990.7809905 1.0260062.4266710.648716552  
0.7553095 3.9998922.2301610.6017361 0.973290345 1.2023640.3650052  
2.1030860.853144789 2.148194312 0.2548588 0.4746006 0.2962141.720662  
1.4048040.6984571 2.1005321.45425 1.5952 1.2620333.3166150.4733692  
1.146434921 0.1770605 1.8764823.49536 0.4621211.3289892.3217722.233636  
1.1123681.2598821.5740882.5475150.9426879 0.6667173 0.3879023  
2.2922220.2732918 0.8509606 0.3265519 2.6400521.2950280.6604881  
1.5904780.4586928 0.4257829 2.3463771.2251095.1351180.8973753  
0.7046883 1.1456461.6245011.6264990.4678268 0.6143489 0.5571366  
0.5902145 1.93035 2.3844471.2849470.1646653 1.6879560.4224680.9449085  
2.2771523.7397172.3178971.5114213.398955841 0.4824144 1.2823652.02175  
3.8430140.5520385 0.829675918 0.685500401 0.3523578 0.908078874  
1.0626314.6022930 1.8389950.5687149 0.4662145 1.6752291.125858  
1.4912511.0632282.9592270.619411532 0.5882412 3.61064 1.8854981.767831  
0.7974408 1.3625940.5940763 4.0057990.7970077 6.447094  
AC093010.2 7.47820218.2911611.0997318.528384914 5.373452215 15.46352  
26.8034820.4082319.6689717.384234.12358821.846130362 15.58545  
15.967093211 20.184155321 10.3609411.933546.16931 9.8218763.281703  
4.736412453 4.8468915.3196920.1535936 2.3589243.4237417.0998416.51774  
5.2418512.495815142 12.556913.893528175 5.4844042.14788 6.3044733.906551396  
5.1013645.4239127.5080667.3007091.9423261.6096973.30417811.955384.754751  
1.5924913.6754437.4896150.8391006 5.0091241.2463113.2661514.139298  
4.060775781 3.0470413.1783243.4659111.7006983.26695216.318253.232186  
7.3158392.18567 5.3401512.29702 3.060201478 4.3146754.8249326.364489  
4.188643016 2.9963170.6544609 2.28689 9.418316087 6.0864233.9930713.02213  
2.9118084.5041523.6957534.9561856.3312323.2515952.0145920.993395122

0.7531439 3.0516021.2406148.5916564.7416360.4826654 5.821128377  
1.8422431.0545367.9375274.28768925 5.7105054.2276413.0354955.316217  
0.9701431 11.063415.7411192.5157593.7831893.0807 3.942752851 9.289635  
4.996681174 7.67478410.163684.1482074.5992518.4842512.2384473.009915  
1.0785251.1752248.7597072.5619155.9310813.6989192.8099332.8180062.412383  
6.9493341.47323 12.2309 9.191792195 1.49794210.014713.9164663.768295  
9.177162042 3.17604 6.4397555.0671546.02688 1.5521513.6880062.031363  
2.6455924.7238162.8817671.8907551.66266622.140274.3899452.56013511.80767  
3.1680192.9032347.9823881.306856724 1.7410239.6344043.861537757 6.523916  
7.5263662.0694049.8097547.9895081.18377 2.533725418 1.9609412.96918  
6.1190695.9963966.4979116.2110026.8345940.8792737 8.3825212.112505315  
10.904140.4260518 4.8853721.8772358.4573965.8626064.22749 6.754763  
6.0794697.0837755.84714210.425782.2787513.70754510.731753.6572482.350957  
4.0135453.614594421 5.6925839.3584032.12239210.854979.6007062.315457  
1.533931596 9.5253254.79879 2.9729083.21261 14.727923868 4.555919  
6.4832367.1798562.0111382.6135381.2828221.3002331.9418746.98245413.79782  
2.05465 5.2873154.0169212.410356442 1.911211239 2.9262011.690191137  
3.538158764 2.6199060.742257709 1.69617413.363029.42698 3.768372483  
9.4826693.1725435.21318512.055919868 7.4170144.07212110.163324.392538  
2.5448332.1314855.5130672.57620411.257282.4657347.6631953.19130779  
6.3858772.674993882 21.400987.7466421.5971892.4780731.0470443.615343  
3.28292212.342312.3142218.250776807 3.4288371.0875972.8908252.321695  
4.0669216.1667594.7384545.5778637.9405 3.8139594.7142359.5151147.246314  
3.3299446.143758142 3.3502873.8491634.6446643.0480041.6468611.432371  
3.2909271.7776842.3253334.1035361.346627572 0.822292625 3.1497351.120477  
14.296174.3227240.9043401 10.8503913.100781.7965523.83382414.42696  
5.7411742.0109652.6467669.82307918.515076.8735022.8077391.7654974.696709268  
8.31343 0.6487598 13.394763.3726051.4923856.5822454.0820273.356132  
5.4290266.0019613.1117421.554371838 15.179273.5107225.8886221.881896  
3.3153463.706058332 7.4571742.4875515.2690184.3662294.4538522.478991  
4.34044397 5.7252624.0264554.7018845.1378733.408395507 4.3998364.730502  
11.6560317.056798251 2.774446803 3.3612821.0811913.6776613.753656  
9.5350361.75125 3.5647633.19761 3.9348057.3417297.6424442.4872763.411226864  
1.3093417.5103989.5775355.5428833.34940712.508164.7307753.1788775.436326  
3.4720567.8224264.7604457.0628491.8216396.0685742.6895623.6329280.9128154  
5.8598272.2330399.7297254.3434965.6260972.9863134.3211332.0494025.940812  
3.1165552.3208136.9272523.8749792.8829432.8912571.9615771.43467 15.96441  
3.8781493.8524682.5142823.5149534.03206112.332431.9785867.1576896.087082  
5.6546195.9110145.06937452 5.3565021.5641955.07344 2.7218365.583293  
2.662044305 4.865959565 6.3395024.784435685 1.83084 7.7827084.602127  
9.9175244.8038972.6495145.0650234.9610154.9723 5.0038616.8193782.361068375  
2.8863926.8645152.0411458.4136324.6203125.1444595.02718 3.3657388.749521  
5.624126  
AC105339.2 0.08558664 0 0.0237629 0.007317262 0.075920919 0.05312446 0

|             |             |             |             |             |             |
|-------------|-------------|-------------|-------------|-------------|-------------|
| 0.01611385  | 0.01210087  | 0.008922914 | 0.07158095  | 0.034996608 | 0.06259031  |
| 0.044170224 | 0.018850808 | 0.3259749   | 0.1183732   | 0           | 0.007603054 |
| 0.043605857 | 0.09497046  | 0.3124658   | 0.1267058   | 0.1115638   | 0.09303868  |
| 0.07615859  | 0.2491094   | 0.06898064  | 0.042745396 | 0.06914457  | 0.126258879 |
| 0.008034302 | 0.09465036  | 0.0923565   | 0.055892685 | 0.1164936   | 0.07544518  |
| 0.2031452   | 0.1299006   | 0.01700812  | 0.08541762  | 0.08170118  | 0.2414199   |
| 0.03331828  | 0.2122240   | 0.04727472  | 0.06521561  | 0.1436083   | 0.1592546   |
| 0.09580755  | 0.1392710   | 0.07331904  | 0.199892637 | 0.04321044  | 0.3492887   |
| 0.2455655   | 0.09179595  | 0.1066071   | 0.04441631  | 0.3566163   | 0.1600038   |
| 0.05023981  | 0.07107736  | 0.07612259  | 0.068778657 | 0.005736273 | 0.7314291   |
| 0.1958518   | 0.025728878 | 0.1421097   | 0.04839372  | 0.1893389   | 0.149470015 |
| 0.2635918   | 0.0530467   | 0.1095001   | 0.1464232   | 0.2456638   | 0.05217169  |
| 0.1359370   | 0.14408     | 0.02176372  | 0.05523992  | 0.006649035 | 0.0454808   |
| 0.03346487  |             |             |             |             |             |
| 0.1935066   | 0.02114327  | 0.1501314   | 0.1192384   | 0.055843719 | 0.06218902  |
| 0.03693648  | 0.1752462   | 0.133830405 | 0.1972057   | 0.005738476 | 0.585631    |
| 0.03549531  | 0.08799472  | 0.05118061  | 0.03121497  | 0.2939879   | 0.1402438   |
| 0.08062603  | 0.14325893  | 1.1531150   | 0.059755395 | 0.02257131  | 0.4547916   |
| 0.05678878  | 0.1476173   | 0.3872872   | 0.09950189  | 0.02692335  | 0.01674769  |
| 0.1900964   | 0.06041656  | 0.08775495  | 0.08050678  | 0.2133114   | 0.2276993   |
| 0.1758170   | 0.1922629   | 0.01051769  | 0.07689678  | 0.06711146  | 0.170937874 |
| 0.09075637  | 0.1076619   | 0.03071523  | 0.07078463  | 0.026455311 | 0.1264579   |
| 0.07756455  | 0.08742713  | 0.06906814  | 0.02060026  | 0.1011537   | 0.1182887   |
| 0.3236732   | 0.09513575  | 0.08910202  | 0.01550717  | 0.04487159  | 0.7436501   |
| 0.004997689 | 0.1223219   | 0.0864874   | 0.1264989   | 0           | 0.05563425  |
| 0.134473637 |             |             |             |             |             |
| 0.1242996   | 0.1994030   | 0.09124836  | 0.1659146   | 0.1678059   | 0.05738282  |
| 0.1279249   | 0.09345662  | 0.2611075   | 0.131148362 | 0.1652333   | 0.08688391  |
| 0.07798267  | 0.1402319   | 0.08611086  | 0.09309503  | 0.2226898   | 0.02403811  |
| 0.02332733  | 0.094625961 | 0.1643912   | 0.04725622  | 0.07601366  | 0.04641769  |
| 0.2418146   | 0.08331852  | 0.3400164   | 0.2366880   | 0.04789869  | 0.1336438   |
| 0.05752203  | 0.1522730   | 0.03498535  | 0.1915417   | 0.04515041  | 0.2113151   |
| 0.04425021  | 0.3508677   | 0.047566604 | 0.2270831   | 0.07869331  | 0.02337389  |
| 0.09113666  | 0.1270593   | 0.2037459   | 0.038835956 | 0.1725644   | 0.03736534  |
| 0.09246554  | 0.1613973   | 0.029934551 | 0.1007268   | 0.1223019   | 0.1452828   |
| 0.1038599   | 0.1358835   | 0.1099038   | 0.0539065   | 0.05758584  | 0.2298156   |
| 0.0220127   | 0.2926562   | 0.1476675   | 0.1043078   | 0.193597216 | 0.113599643 |
| 0.2858745   | 0.123621687 | 0.066379347 | 0.03893085  | 0.094089943 | 0.1297712   |
| 0.1486041   | 0.1767226   | 0.095928701 | 0.2773069   | 0.1665380   | 0.3162189   |
| 0.162056983 | 0.08156784  | 0.1690727   | 0.1483613   | 0.08850616  | 0.2852459   |
| 0.2306857   | 0.05810544  | 0.1845209   | 0.02320442  | 0.05630693  | 0.08451461  |
| 0.104906136 | 0.08346967  | 0.038284028 | 0.07866809  | 0.09397841  | 0.05921746  |
| 0.02498722  | 0.08966271  | 0.1817793   | 0.1249467   | 0.01941797  | 0.2760143   |
| 0.092394759 | 0.1942913   | 0.1809489   | 0.2060692   | 0.2580997   | 0.05303502  |
| 0.05607534  | 0.06113163  | 0.08956525  | 0.02660252  | 0.4222051   | 0.09371015  |
| 0.06560106  | 0           | 0.02949151  | 0.311094343 | 0.1496864   | 0.1367312   |
| 0.1539229   |             |             |             |             |             |



|             |             |             |             |             |             |
|-------------|-------------|-------------|-------------|-------------|-------------|
| 0.04168666  | 0.0929927   | 0.0654186   | 0.02914596  | 0.1007190   | 0.09357391  |
| 0.1665184   | 0.150054846 | 0.174667904 | 0.1403159   | 0.04438555  | 0.0107556   |
| 0.3010738   | 0.09325353  | 0.03298149  | 0.06411785  | 0.04483518  | 0.6948786   |
| 0.08874287  | 0.2672095   | 0.05181457  | 0.08857725  | 0.1620694   | 0.120056    |
| 0.01604218  | 0.2504024   | 0.0639688   | 0.165348334 | 0.4123035   | 0.09066737  |
| 0.07696197  | 0.01119036  | 0.01206992  | 0.01984684  | 0.3058146   | 0.01489003  |
| 0.1954621   | 0.1524876   | 0.2121706   | 0.0481255   | 0.04701634  | 0.2869244   |
| 0.1235681   | 0.03960906  | 0.07425255  | 0.147477181 | 0.1603159   | 0.03183585  |
| 0.3123445   | 0.03698193  | 0.03929594  | 0.05745459  | 0.07679604  | 0.08089899  |
| 0.2240277   | 0.1092454   | 0.06445019  | 0.126369855 | 0.05993165  | 0.0504115   |
| 0.03112081  | 0.164119414 | 0.154578443 | 0.04022742  | 0.1553321   | 0.02504733  |
| 0.08878995  | 0.1823966   | 0.09187156  | 0.1081148   | 0.04077387  | 0.07134037  |
| 0.0804469   | 0.07282578  | 0.1250082   | 0.074027285 | 0.04716155  | 3.396902    |
| 0.08995346  | 0.08388342  | 0.08329112  | 0.1603320   | 0.07211486  | 0.02257437  |
| 0.5816721   | 0.1801314   | 0.1926752   | 0.05356647  | 0.05147413  | 0.09184093  |
| 0.1295112   | 0.05882308  | 0.1666051   | 0.05798656  | 0.4918556   | 0.05574815  |
| 0.1744229   | 0.2133876   | 0.02413366  | 0.09576915  | 0.0653571   | 0.04972464  |
| 0.2130794   | 0.05311632  | 0.06673765  | 0.2131222   | 0.2649616   | 0.1444105   |
| 0.08491912  | 0.02566855  | 0.06595467  | 0.07685753  | 0.1949122   | 0.326844    |
| 0.1140855   | 0.03898666  | 0.2473996   | 0.1136645   | 0.1006737   | 0.4199113   |
| 0.1609867   | 0.4939130   | 0.0715697   | 0.102422346 | 0.08062439  | 0.04269608  |
| 0.3241032   | 0.01467554  | 0.03630619  | 0.046973961 | 0.072133838 | 0.03128448  |
| 0.071666495 | 0.05660816  | 0.2366418   | 0           | 0.4354060   | 0.09088919  |
| 0.1097068   | 0.01999211  | 0.09059109  | 0.0587377   | 0.2261545   | 0.081474298 |
| 0.0253225   | 0.5804646   | 0.08370305  | 0.0224227   | 0.1960662   | 0.1113779   |
| 0.05626211  | 0.1967477   | 0.01110011  | 0.2961737   |             |             |
| SOCAR       | 0.0999313   | 0.03423727  | 0.03853563  | 0.106795815 | 0.052765222 |
|             | 0.05169028  |             |             |             |             |
| 0.08169246  | 0.1567883   | 0.02943548  | 0.05788017  | 0           | 0.283765145 |
| 0           |             |             |             |             |             |
| 1.146074059 | 0.030569833 | 0           | 0           | 0.9282867   | 0           |
|             |             |             |             |             |             |
| 0.2598935   | 0.1572570   | 0.09065089  | 0.0678450   | 0.1077702   | 0.9703907   |
|             |             |             |             |             |             |
| 0.3076260   | 0.55455219  | 0.9671198   | 0.07020018  | 0           | 0.2192741   |
|             |             |             |             |             |             |
| 0.163151315 | 0.1360184   | 0.3670421   | 0.3007884   | 0.3447101   | 0.08274478  |
| 0.7217589   | 0.03974776  | 0.3116052   | 0.09725639  | 0.1571155   | 1.630854    |
| 0.1850771   | 0.05112123  | 0.1631108   | 0.09322107  | 0.3528936   | 0.1188995   |
| 0.22101842  | 0.1576647   | 0.06620632  | 0.2737810   | 0.08588247  | 0.1251903   |
| 0.2971184   | 0.3212859   | 0.2675823   | 0.2987326   | 0.8644814   | 0.343885    |
| 0.608380591 | 0.7534907   | 0.05648277  | 0.02443135  | 0.325445712 | 0.02560615  |
|             |             |             |             |             | 0           |
| 0.06140914  | 0.503428254 | 0.3244572   | 0.5734958   | 0.3297789   | 0.02849406  |
| 0.09373793  | 0           | 0           | 0.1236974   | 0.4235234   | 0.2828875   |
|             |             |             |             |             |             |
| 0.1264371   | 0.4395793   | 0.1464420   | 0.1285779   | 0.06351233  | 0.06215322  |
| 0.235456549 | 0.1134565   | 0.08984831  | 0           | 0.244157692 | 0.2977477   |
|             |             |             |             |             |             |
| 0.1737259   | 0.07400797  | 0.2911051   | 0.4979891   | 0.03037227  | 0.04848327  |
| 0.01895246  | 0.3268725   | 0.64193418  | 2.5299660   | 0.245986237 | 0.3660327   |
| 0.08969874  | 0.1184050   | 0.1500657   | 0.06454378  | 0.05239302  | 0.407389    |

|                            |                    |                    |                   |                    |                    |            |
|----------------------------|--------------------|--------------------|-------------------|--------------------|--------------------|------------|
| 0.09248224                 | 0.1679586          | 0.1992337          | 0.2350001         | 0.07593393         | 0.07728566         |            |
| 0.1267189                  | 0.03017298         | 0.1023375          | 0                 | 0.1632492          | 0.346506517        | 0.01635301 |
| 0.7177683                  | 0.6350779          | 0.06887369         | 1.587368268       | 0.2636656          | 0.1161086          |            |
| 0.1276003                  | 1.4280750.1002206  | 0.03785495         | 0.2441416         | 0.5450801          |                    |            |
| 0.0319198                  | 0.07224714         | 0.2766231          | 0.1679239         | 6.1313380.02431384 |                    |            |
| 0.0991831.3324150.03418996 | 0.9054761          | 0                  | 0.118948456       | 0.03779498         |                    |            |
| 0.02621889                 | 0.549621197        | 0.5222911          | 0.2401113         | 0.1776526          | 0.2154312          |            |
| 0.02841675                 | 0.2540585          | 0.296232389        | 0                 | 0.02817945         | 0                  | 0.03411153 |
| 0.09857195                 | 0.4076180.2314935  | 0.1871133          | 0.3026343         | 0.368285516        |                    |            |
| 0.2665887                  | 0                  | 0.2958462          | 0.2484051         | 0.3976672          | 0.6186860.2867255  |            |
| 0.1515120.1271061          | 0.1250345          | 0.2152659          | 0.1395731         | 0.4133533          | 0                  |            |
| 0.4792528                  | 0.1285064          | 0.3498268          | 0.02893182        | 0.277694795        | 0.2155636          |            |
| 0.1276148                  | 0.1137144          | 0.0633402          | 0.4636091         | 0.07774332         | 0.440854356        |            |
| 0.5037172                  | 0.1298450.1832708  | 0.1784547          | 0.242720159       | 0.3170832          |                    |            |
| 0.2192109                  | 0.1308895          | 0.05227037         | 0.1322151         | 0.05012663         | 0.1430487          |            |
| 0.07640621                 | 0                  | 0.5711583          | 0.1395860.1436810 | 0.274707336        | 0.39722738         |            |
| 0.4757945                  | 0.346973996        | 0.347777921        | 0.1657243         | 0.085827967        | 0.1636805          |            |
| 0.1314475                  | 0.05373489         | 0.291684219        | 0.1686378         | 0.4710525          | 0.03846025         |            |
| 0.220754787                | 0.4761947          | 0.08225418         | 0.6315576         | 0.2583504          | 0.1015409          | 0          |
| 0.1413420                  | 1.3170490.05478684 | 0.1809126          | 0.243033391       | 0.4060814          |                    |            |
| 0.186252445                | 0.08320034         | 0.1418917          | 0.08473351        | 0.5470346          | 0.08724212         |            |
| 0.0822660.2127538          | 0.4014922          | 0                  | 0.321072902       | 0.1810016          | 0.1173759          |            |
| 0.0135477                  | 0.0199311          | 0.3374059          | 0                 | 0.2703695          | 0.1025262          | 0.2750211  |
| 0.0844124                  | 0.0804532          | 0.3682503          | 1.7003410.7412962 | 0.121078338        |                    |            |
| 0.2589251                  | 0.1900570.7702326  | 0.2028063          | 0.1413784         | 0.02652188         |                    |            |
| 0.3544890.1451850.1874512  | 0.4320612          | 0.235490115        | 0.32232363        | 0.09751986         |                    |            |
| 0.04318729                 | 0.05232617         | 0.2401195          | 0.2134965         | 0.2292222          | 0.4866177          |            |
| 0.5574278                  | 0.2397586          | 0                  | 0.2363598         | 0.0336105          | 0.06894877         | 0.4174256  |
| 0.05078908                 | 0.2341364          | 0.1433191          | 0.2889801         | 0.086964587        | 0.2075031          |            |
| 0.2450546                  | 0.1465127          | 0.08166196         | 0.4991230.7000253 | 0.8453371          |                    |            |
| 0.03622013                 | 0.1653785          | 0                  | 0.03329721        | 0.162090947        | 0.3558105          | 0.3101982  |
| 0.5465101                  | 1.09196            | 0.3371573          | 0.398599431       | 0.2249826          | 0.1720910.01853123 |            |
| 0.4198080.03475917         | 0.1048191          | 0.813159953        | 0.6007196         | 0.2229338          |                    |            |
| 0.1328702                  | 0.2970486          | 0.126574716        | 0.1822303         | 0.4905056          | 0.2725259          |            |
| 0.614187474                | 0.024258927        | 0.6727430.09647146 | 0.3411959         | 0.05081937         |                    |            |
| 0.0521978                  | 0.4916523          | 0.05259805         | 0.2644874         | 0.2041601          | 0.02795539         |            |
| 0.2002557                  | 0.02097127         | 0.160063996        | 0.3569094         | 1.1257480.05835002 | 0                  |            |
| 0.2251182                  | 0.2005760          | 1.2629840.03628006 | 0.2115309         | 0.02037757         |                    |            |
| 0.02171681                 | 0.01669483         | 0.08936153         | 0.2100246         | 0.3863366          | 0.09424847         |            |
| 0.1567253                  | 0.04985179         | 0.09492548         | 0.6437430.2035557 | 0.7338167          |                    |            |
| 0.1716542                  | 0.4769451          | 0.3427076          | 0.09146778        | 0.3732615          | 0.3652648          | 0          |
| 0.02079101                 | 0.02927332         | 0.1436984          | 0.08325194        | 0.3030444          | 0.1359684          |            |
| 0.6539663                  | 0.02409245         | 0.2877922          | 1.3909190         | 0.3317879          | 0.1269798          |            |
| 0.05044138                 | 0                  | 0                  | 0.8051843         | 0.427102663        | 0.6047018          | 0.2769562  |

|             |             |             |             |             |             |             |             |             |   |            |  |
|-------------|-------------|-------------|-------------|-------------|-------------|-------------|-------------|-------------|---|------------|--|
| 0.3638695   | 0.3212854   | 0.4769016   | 0.207753739 | 0.460598695 | 1.902494    |             |             |             |   |            |  |
| 0.261494029 | 0.1529998   | 0           | 0           | 0.1741034   | 0.3602927   | 0.1464578   |             |             |   |            |  |
| 0.2873905   | 0.1621032   | 0.0113007   | 0.5715198   | 0.02157344  | 0.158549533 |             |             |             |   |            |  |
| 0.8931593   | 0.1540347   | 0.5701035   | 1.4908530   | 0.07065669  | 0.4671166   |             |             |             |   |            |  |
| 0.1539653   | 0.09817241  | 0.2160090   | 0.1108377   |             |             |             |             |             |   |            |  |
| RNF216-IT1  | 0.08787233  | 0.4515865   | 0           | 0.187816973 | 0.046397905 | 0.06817902  |             |             |   |            |  |
| 0.4310065   | 0.2068023   | 0.4659016   | 0.2290303   | 0           | 0           | 0.2677578   | 0           |             |   |            |  |
| 0.645141394 | 0.1418138   | 0           | 0.08444151  | 0           | 0           | 0           | 0           | 0.09565417  |   |            |  |
| 0.05965797  | 0.2274366   | 0.04654315  | 0.09134362  | 0           | 0           | 0.1109237   | 0           |             |   |            |  |
| 0.1031108   | 0.05784411  | 0.07408047  | 0.04782114  | 0           | 0           | 0.2267070   | 0.1515565   |             |   |            |  |
| 0           | 0           | 0.1048539   | 0.1896944   | 0           | 0           | 0.05515596  | 0           | 0.0899046   | 0 | 0          |  |
| 0           | 0.07841367  | 0           | 0.1386388   | 0           | 0.2626288   | 0.1359339   | 0.1415356   |             |   |            |  |
| 0.2137617   | 0           | 0.06417067  | 0           | 0           | 0.06978173  | 0.160489717 | 0           | 0.1986674   |   |            |  |
| 0           | 0           | 0           | 0.3105383   | 0           | 0           | 0.1630309   | 0           | 0.1338386   | 0 | 0.06181975 |  |
| 0           | 0           | 0           | 0.06982795  | 0.1119378   | 0           | 0.08338467  | 0.04294824  | 0.05518735  |   |            |  |
| 0           | 0.0418861   | 0           | 0.09555849  | 0           | 0.03950304  | 0.06247443  | 0.107347274 |             |   |            |  |
| 0.2618177   | 0           | 0           | 0           | 0.04517236  | 0.1094739   | 0.0801215   | 0           | 0.199985    |   |            |  |
| 0.05748559  | 0.04838317  | 5.94857     | 0           | 0           | 0           | 0           | 0           | 0.2073178   | 0 |            |  |
| 0.06099163  | 0           | 0           | 0           | 0.0679594   | 0           | 0.1591916   | 0.2024733   | 0           |   |            |  |
| 0.07177474  | 0.091407802 | 0.0862779   | 0.2046984   | 0           | 0.06056252  | 0           | 0           |             |   |            |  |
| 0.07657308  | 0.1122025   | 0.1108011   | 0           | 0.09986069  | 0           | 0           | 0.08420386  | 0           |   |            |  |
| 0           | 0.1328941   | 7.9364880   | 0.3206974   | 0           | 0           | 0.04509626  | 0           | 0.07140004  | 0 |            |  |
| 0           | 0           | 0.278825179 | 0.06262703  | 0           | 0           | 0.06314485  | 0.1499258   | 0           | 0 | 0          |  |
| 0.07433688  | 0.2309576   | 0           | 0           | 0.2986914   | 0.0732811   | 0           | 0.2494824   |             |   |            |  |
| 0.080960886 | 0           | 0           | 0.04877731  | 0           | 0.04370996  | 0.1688361   | 0.2327313   | 0           |   |            |  |
| 0           | 0           | 0.05678676  | 0.4248361   | 0           | 0           | 0.08474942  | 0           | 0.3816081   | 0 |            |  |
| 0           | 0           | 0.1499883   | 0.05569677  | 0.06794403  | 0           | 0           | 0.06327605  | 0.1370115   |   |            |  |
| 0           | 0.09415208  | 0.128058292 | 0.07604181  | 0           | 0           | 0.09192554  | 0.05813017  |             |   |            |  |
| 0.1322332   | 0           | 0           | 0.07562599  | 0.1883382   | 0           | 0           | 0.103524723 | 0           | 0 |            |  |
| 0.122041497 | 0           | 0           | 0.075470883 | 0           | 0.08668907  | 0           | 0.076945778 | 0           |   |            |  |
| 0.04970513  | 0           | 0           | 0.1046828   | 0.1084925   | 0.3570081   | 0.2271746   |             |             |   |            |  |
| 0.08928774  | 0.06436045  | 0           | 0.0473622   | 0           | 0.04817557  | 0           | 0.064111776 |             |   |            |  |
| 0.1071235   | 0.061416329 | 0.08779241  | 0.3327180   | 0.0447051   | 0.2405113   | 0           |             |             |   |            |  |
| 0.05425406  | 0.08017725  | 0.1869051   | 0.06945725  | 0.05646564  | 0.1061064   |             |             |             |   |            |  |
| 0.1548178   | 0.0714772   | 0           | 0.0523571   | 0           | 0.07132298  | 0.1352312   |             |             |   |            |  |
| 0.08535303  | 0           | 0           | 0.06476252  | 0.1094017   | 0           | 0.05323375  | 0           | 0           | 0 | 0          |  |
| 0           | 0           | 0           | 0           | 0           | 0           | 0.05145113  | 0           | 0.2760710   | 0 | 0.1209368  |  |
| 0.0987453   | 0           | 0.1897437   | 0           | 0           | 0           | 0.1223513   | 0.06699035  |             |   |            |  |
| 0.06862752  | 0.04725914  | 0           | 0.114705517 | 0.1216421   | 0           | 0.08588841  | 0           | 0           |   |            |  |
| 0.1273555   | 0.3567975   | 0           | 0.05453321  | 0           | 0.08783745  | 0           | 0.2681776   |             |   |            |  |
| 0.1022872   | 0           | 0.1129635   | 0           | 0.126179784 | 0           | 0.09079462  | 0           | 0.07910329  |   |            |  |
| 0.09169406  | 0           | 0.115951431 | 0           | 0.06534394  | 0           | 0.08706765  | 0           | 0.09614406  |   |            |  |
| 0.1848493   | 0           | 0.081010781 | 0.063994617 | 0.06453397  | 0.16966     | 0           | 0.06703029  |             |   |            |  |
| 0           | 0           | 0.06937636  | 0           | 0.05385706  | 0           | 0.08127248  | 0           | 0.052780746 |   |            |  |

|             |             |             |             |             |             |             |           |             |            |
|-------------|-------------|-------------|-------------|-------------|-------------|-------------|-----------|-------------|------------|
| 0.06725147  | 6.4145610   | 0           | 0.05938577  | 0.1763720   | 0.1851019   | 0           | 0         | 0           | 0          |
| 0.05728857  | 0.08808135  | 0.1178671   | 0.1582975   | 0           | 0           | 0           | 0         | 0.1073193   |            |
| 0           | 0.1073953   | 0.1548636   | 0           | 0.06989848  | 0.05317979  | 0           | 0         | 0           | 0          |
| 0           | 0.09476847  | 0           | 0.04702505  | 0.1793412   | 0           | 0           | 0         | 0           | 0.06105932 |
| 0.04785293  | 0.1330635   | 0           | 0.06402823  | 0.05740708  | 0.093890768 | 0.08622663  |           |             |            |
| 0.1217676   | 0.06399208  | 0           | 0.04659474  | 0           | 0.057859579 | 0           | 0         | 0           | 0          |
| 0.07654694  | 0.04320208  | 0           | 0.1083044   | 0           | 0           | 0.3230698   | 0         | 0.104562712 |            |
| 0.08124615  | 0           | 0           | 0           | 0.04659777  | 0.09857963  | 0.04512864  | 0.1942328 |             |            |
| 0.5698278   | 0.0487313   |             |             |             |             |             |           |             |            |
| AC087301.1  | 0           | 0.0948191   | 0.1600849   | 0.098589283 | 0           | 0.07157735  | 0         | 0           | 0          |
| 0           | 0.08767704  | 0.078587917 | 0.04685066  | 0.066125379 | 0.169324494 | 0.07444118  |           |             |            |
| 0.07249565  | 0.3546017   | 0           | 0.3576051   | 0.391682933 | 0.3198966   | 0.09678194  |           |             |            |
| 0.1004220   | 0.2505263   | 0.5969326   | 0.6352198   | 0.9589658   | 0.1549020   | 0.191976985 |           |             |            |
| 0.1164526   | 0.340230311 | 0.1082503   | 0.1821819   | 0.1555459   | 0.401637989 |             |           |             |            |
| 0.1255663   | 0.2772306   | 1.0710320   | 0.3182215   | 0.07638641  | 0.1211448   |             |           |             |            |
| 0.4403210   | 0.5310654   | 0.0897829   | 0.3108048   | 0.2895258   | 0.1464473   | 0           |           |             |            |
| 0.1129326   | 0.06454325  | 0.1172794   | 0.08232214  | 0.183631192 | 0.1455492   |             |           |             |            |
| 0.6111882   | 0.6203686   | 0.04756979  | 0.1981204   | 0.2244165   | 0.08897919  |             |           |             |            |
| 0.2021076   | 0.2256357   | 0.2394156   | 0.2197799   | 0.168489204 | 0           | 1.147134    |           |             |            |
| 0.06766189  | 0.138663426 | 0.4254929   | 0           | 0.3401416   | 0.154914406 | 0.3423141   |           |             |            |
| 0           | 0.1405097   | 0.7102211   | 0.1298022   | 0.08786703  | 0.3522211   | 0.4567682   |           |             |            |
| 0           | 0.07834486  | 0           | 0.2188523   | 0.1352669   | 0.7531956   | 0           | 0.2638433 | 0           |            |
| 0.200643059 | 0.1571072   | 0           | 0.6558842   | 1.014281255 | 0.6413582   | 0           |           |             |            |
| 0.4811287   | 0.06832096  | 0           | 0.2873262   | 0.0841151   | 0.06713648  | 0.2624414   |           |             |            |
| 0           | 0.152384375 | 2.58942     | 0.061931964 | 0           | 0.4968360   | 0.1093064   | 0.1894214 |             |            |
| 0.2308904   | 0.3575042   | 0           | 0.1504336   | 0.1280634   | 0.1162891   | 0.07882454  |           |             |            |
| 0           | 0.07009892  | 0.4994275   | 0.8773609   | 0.2924711   | 0           | 0           | 0.2260569 |             |            |
| 0.191927909 | 0.04528918  | 0.3760775   | 0.3621120   | 0.2543249   | 0.11881539  |             |           |             |            |
| 0.3042559   | 0.1607796   | 0           | 0.05816194  | 0.06938951  | 0           | 0.04829593  |           |             |            |
| 0.08386573  | 0.3978042   | 0.1333909   | 0.06964541  | 0.2325301   | 2.6367330   | 0           |           |             |            |
| 0.09710747  | 0.1893762   | 0           | 0.1499178   | 0.164712115 | 0           | 0.07261244  |           |             |            |
| 0.175633805 | 0.06574863  | 0.7979773   | 0.2108587   | 0.2651690   | 0.3147974   | 0           |           |             |            |
| 0.252432872 | 0.07950978  | 0           | 0.2424695   | 0.4723543   | 0.1364960   | 0.4390112   |           |             |            |
| 0.2820904   | 0.06477559  | 0           | 0.254988959 | 0.2768661   | 0.1591769   | 0.1024172   |           |             |            |
| 0.1876229   | 0.6424411   | 0.2954194   | 0.4275804   | 0.5035295   | 0.2933472   |             |           |             |            |
| 0.2770235   | 0.2384690   | 0.2676070   | 0.0673394   | 0           | 0.1106064   | 0.2669211   |           |             |            |
| 0.07452576  | 1.1217610   | 0.128177919 | 1.1193690   | 0.2356169   | 0.3149286   | 0.5262564   |           |             |            |
| 0.2139920   | 0.4844426   | 0.116279342 | 0.13286     | 0.07192038  | 0.1845683   | 0.2965351   |           |             |            |
| 0.134441259 | 0.1995801   | 0.2601849   | 0.07249893  | 0.2412687   | 0.2441105   |             |           |             |            |
| 0.6015716   | 0.1320564   | 0.07053491  | 0.3969775   | 0.09886287  | 0.2319476   |             |           |             |            |
| 0.3979203   | 0.07026965  | 0           | 0.047830847 | 0.7095302   | 0.064062281 | 0           | 0         |             |            |
| 0.158465343 | 0.06475832  | 0.18202     | 0.6944803   | 0.242343243 | 0.1868150   | 0.1565479   |           |             |            |
| 0.5858299   | 0.174678243 | 0.1099006   | 0           | 0.6246715   | 0.3577469   | 0.2812146   |           |             |            |
| 0.4729792   | 0.2609616   | 0.5469522   | 0           | 0           | 0.04554837  | 0           | 0         | 0.193432737 |            |

|             |             |             |             |             |             |
|-------------|-------------|-------------|-------------|-------------|-------------|
| 0.6451785   | 0.3929648   | 0.04693339  | 0.1683329   | 0.08053816  | 0.05695831  |
| 0.08417363  | 0.1308142   | 0.2187579   | 0.118560253 | 0.3341857   | 0.1625345   |
| 0.2626397   | 0.5519860   | 0.1162357   | 0.4492681   | 0.2129575   | 0.1792148   |
| 0.8571847   | 0.1485418   | 0           | 0.1148547   | 0.06622573  | 0.335322874 |
| 0.1315893   | 0           | 0.04320508  | 1.0180130   | 0.06544978  | 0.1507821   |
| 0.2991452   | 0.195654871 | 0.162302865 | 0.1620470   | 0.3588178   | 0.07245788  |
| 0.3325020   | 0.07390902  | 0.0634824   | 0.1036672   | 0           | 0.2656017   |
| 0.1396249   | 0           | 0.5137991   | 0.3868119   | 0.07204821  | 0.2480737   |
| 0           | 0.7662316   | 0.47507     | 0.2705084   | 0.07538679  | 0           |
| 0.2006211   | 0.9160219   | 0.2465453   | 1.1988030   | 0.049878453 | 0.07038618  |
| 0.3221568   | 0.07567718  | 0.1185941   | 0           | 0.397407358 | 0.04153884  |
| 0.2052868   | 0           | 0.09626448  | 0.1935289   | 0.243461884 | 0.1147362   |
| 0.1839901   | 0.09140747  | 0.200311388 | 0.3028089   | 0.09703149  | 0           |
| 0.537475041 | 0.03387531  | 0.04452914  | 0.06749514  | 0.1407427   | 0.1445603   |
| 0.2185031   | 0.3662451   | 0.1130830   | 0.2559703   | 0.2903966   | 0.221646249 |
| 2.9930180   | 0.2423980   | 0.2948361   | 0.3740749   | 0.9875368   | 0.1295521   |
| 0.5023828   | 0.4184491   | 0.2821754   | 0           | 0.6935377   | 0           |
| 0.0396277   | 0.4698330   | 0.9664414   | 0.1502248   | 0.2431128   | 0.05637416  |
| 0           | 0.1467650   | 0.2233220   | 0.5066346   | 0           | 0.1123989   |
| 0.09949213  | 0.1152819   | 0.04936898  | 0.09414014  | 0.9961272   | 0.6672333   |
| 0.05693085  | 0           | 0.1923083   | 0           | 0.1004762   | 0.6984795   |
| 0.2016590   | 0.1808055   | 0.098570682 | 0.2263113   | 0.1917555   | 0.3359086   |
| 0.057536783 | 0.242974182 | 0           | 0.160933328 | 0           | 0.1482976   |
| 0.1814218   | 0.06760176  | 0.0568514   | 0.08978802  | 0.1251878   | 0.05652882  |
| 0.4182290   | 0.10977456  | 0.1705916   | 0.3554955   | 0.07518499  | 0           |
| 0.05174663  | 0.1895122   | 1.1555140   | 0.5627631   |             |             |
| LINC00092   | 0.2311507   | 0.06599508  | 0.3639746   | 0.082343001 | 0.176295943 |
| 0.7871335   | 0.5563897   | 0.6044439   | 0.1134785   | 0.1952452   | 0.2318917   |
| 0.503221675 | 0.7565182   | 0.902069458 | 0.047140644 | 0.2279721   | 0.8779645   |
| 0.5429743   | 0.3778860   | 0.03111211  | 0.149938469 | 0.05566284  | 0.03368062  |
| 0.01397895  | 0.03487378  | 0.04985656  | 0.2040552   | 0.03337251  | 0.04312536  |
| 0.204880902 | 0.3323141   | 0.115019007 | 0.04520601  | 0.06762694  | 0.01082616  |
| 0.090851872 | 0.03495818  | 0.06431846  | 0.1159588   | 0.04429709  | 0           |
| 0.1072638   | 0.1386101   | 0.08748577  | 0.008652935 | 0.0403026   | 0.5708015   |
| 0.0131387   | 0.06288183  | 0.01796911  | 0.03265108  | 0.06875648  | 0.059644303 |
| 0.06078225  | 0.0510472   | 0.03838071  | 0.01324363  | 0.01378939  | 0.124957    |
| 0.03715827  | 0.04688967  | 0.06281792  | 0.08887239  | 0.01019794  | 0.105543216 |
| 0.1613793   | 0.02177502  | 0.1130241   | 0.048255594 | 0.01974317  | 0           |
| 0.291119504 | 0.4526830   | 0.03316377  | 0           | 0           | 0.04517184  |
| 0.1589577   | 0           | 0.07634037  | 0.012470545 | 0.01218588  | 0.06904125  |
| 0.1784479   | 1.4997080   | 0.034912414 | 0           | 0           | 0.1095605   |
| 0.06457652  | 0.01339482  | 0.01902084  | 0.02640605  | 0.03199713  | 0.105381    |
| 0.01869108  | 0           | 0.05040584  | 0.155556296 | 0.4876713   | 0.060347408 |
| 0.02305354  | 0.0380392   | 0.01318393  | 1.84486     | 0.0373240   | 0.0403967   |

|             |             |             |             |             |             |
|-------------|-------------|-------------|-------------|-------------|-------------|
| 0.008913347 | 0.0566569   | 0.07680778  | 0.01509938  | 0.01951583  | 0.00993162  |
| 0.07327828  | 0.02326433  | 0.1578110   | 0.03605579  | 0.1992947   | 0.12022544  |
| 0.01891304  | 0.2617538   | 0.1584212   | 0.01770127  | 0.529259188 | 0.0762355   |
| 0.1119043   | 0.01639733  | 0.04857758  | 0.03863666  | 0.01459369  | 0.08739761  |
| 0.1400914   | 0.01845839  | 0.009284144 | 0.02908436  | 0.01294747  | 0.3229941   |
| 0.05624026  | 0.00955916  | 0.1216581   | 0           | 0.04848272  | 0.2504265   |
| 0.08742343  | 0.1415092   | 0.065196243 | 0.05491407  | 1.1108010   | 0.04891995  |
| 0.0461401   | 0.2738778   | 0.03917744  | 0           | 0.01106793  | 0.1955453   |
| 0.01315054  | 0.0855024   | 0.1658735   | 0.02855823  | 2.0468360   | 0.08021088  |
| 0.094653317 | 0.1541613   | 0           | 0.04989839  | 0.06964666  | 0.07665355  |
| 0.05101721  | 0.09345648  | 0.1715051   | 0.03856225  | 0.04149423  | 0.09105912  |
| 0.04686892  | 0.01026413  | 0.02309495  | 0           | 0.04149656  | 0.02676395  |
| 0.04155161  | 0.9101544   | 0.03287904  | 0.02441866  | 0.3574575   | 0.04495695  |
| 0.040465816 | 0.5363372   | 0.05005733  | 0.01284615  | 0.01375943  | 0.224574038 |
| 0.1500226   | 0.01207276  | 0.20184     | 0.006717022 | 0.05097103  | 0.00644154  |
| 0.07353012  | 0.009818607 | 0           | 0.01376192  | 0.01076253  | 0.1177066   |
| 0.015129155 | 0.03994892  | 0.1128778   | 0.071340823 | 0.086190409 | 0.164287    |
| 0.033088058 | 0.01802899  | 0.2153693   | 0.04833655  | 0.044979579 | 0           |
| 0.03706761  | 0.060788937 | 0.07649196  | 0.04756546  | 0.4695601   | 0.07746528  |
| 0.1957283   | 0.1034624   | 0.0363264   | 0.01384307  | 0.05802782  | 0           |
| 0.084323945 | 0.04696526  | 0.053852479 | 0.7441416   | 0.03646768  | 0.006533226 |
| 0.07029688  | 0.03363324  | 0           | 0.02343429  | 0.5644979   | 0.04060207  |
| 0.02325967  | 0.01131257  | 0.01566857  | 0.00768376  | 0.05356045  | 0.01618026  |
| 0.1563476   | 0.009881376 | 0.1184986   | 0.07593211  | 0.05169333  | 0.06625099  |
| 0.1438922   | 0.1106251   | 0.031118428 | 0.04990989  | 0.05495251  | 0.2474475   |
| 0.03007119  | 0.1308088   | 0           | 0           | 0.03498198  | 0.03097091  |
| 0.063549652 | 0.429265035 | 0.1428628   | 0           | 0.1210355   | 0.1295979   |
| 0.04418441  | 1.1159730   | 0.1868673   | 0.009243078 | 2.6075750   | 0.1366807   |
| 0.03322607  | 0.3397290   | 0.03426501  | 0.04011704  | 0.06215827  | 0.05998809  |
| 0.117341853 | 0.1155495   | 0.1417087   | 0.08786243  | 0.05246999  | 0.498028    |
| 0.1582002   | 0.1042851   | 0.2653054   | 0.00796951  | 0.02287975  | 0.01925491  |
| 0.041659107 | 0.3821182   | 0           | 0.08427537  | 0.08254274  | 0.05570551  |
| 0.01156459  | 0.0464407   | 0           | 0.1849631   | 0.05360086  | 0.08081888  |
| 0.1197864   | 0.03819759  | 0.2219690   | 0.1399652   | 0.034854703 | 0.02810108  |
| 0.1350699   | 0.02334735  | 6.973145263 | 0           | 0.01886205  | 0.01859565  |
| 0.03918336  | 0           | 0.05169269  | 0.0101387   | 0.01699403  | 0.03148279  |
| 0.0178158   | 0.01616953  | 0.061707239 | 0.1179380   | 0.03471952  | 0.02249487  |
| 0.0273612   | 0.1215013   | 0.03436679  | 0           | 0.1340741   | 0.02797309  |
| 0.0392794   | 0.05023308  | 0.03218063  | 0.06890061  | 0.06940103  | 0.02758129  |
| 0.05813488  | 0.01208403  | 0.08648399  | 0.0575069   | 0.07896422  | 0.0706266   |
| 0.3281618   | 0.01890727  | 0.07150499  | 0.09326066  | 0.0587705   | 0.0442764   |
| 0.06258464  | 0.07267632  | 0.01603054  | 0           | 0.02769902  | 0           |
| 0.4062396   | 0.02521145  | 0.009288027 | 0.03169957  | 0.07312112  | 0.02676972  |
| 0.1534915   | 0.04895276  | 0.07778384  | 0.01078347  | 0.09357117  | 0           |

|             |             |             |             |             |             |             |             |
|-------------|-------------|-------------|-------------|-------------|-------------|-------------|-------------|
| 0.2961283   | 0           | 0.009351834 | 0.1376230   | 0.2519470   | 0.01601848  | 0.186023815 |             |
| 0.2444807   | 0.033603381 | 0.03539033  | 0           | 0           | 0.1398326   | 0.03156787  |             |
| 0.03764122  | 0.2374150   | 0.08749075  | 0.0566358   | 0.0786893   | 0.05821834  | 0           |             |
| 0.1187335   | 0.02969143  | 0.1883863   | 0.1682189   | 0.1293866   | 0.09364209  |             |             |
| 0.5408001   | 0.06623232  | 0.1145030   | 0.07833779  |             |             |             |             |
| AC087286.4  | 0.01984784  | 0.04080018  | 0.04592249  | 0.084844933 | 0.12575947  |             |             |
| 0.1539968   | 0.06490134  | 0.06228095  | 0.07015588  | 0.1379503   | 0           | 0           |             |
| 0.0604788   | 0           | 0.036429734 | 0           | 0.03119451  | 0           | 0.02203968  | 0.05770337  |
| 0.06882494  | 0.04164478  | 0.1512387   | 0           | 0.05137141  | 0           | 0.1237914   | 0           |
| 0.055071146 | 0.02505448  | 0.041828391 | 0           | 0.02613065  | 0.0334653   | 0.064808543 |             |
| 0           | 0.07952728  | 0.1024132   | 0           | 0           | 0.07819202  | 0           | 0           |
| 0.03150776  | 0           | 0.1457830   | 0.06728631  | 0.07084559  | 0.026338522 | 0.03131454  |             |
| 0.07889735  | 0           | 0.04093808  | 0.02131255  | 0           | 0.03828729  | 0           | 0.0323633   |
| 0           | 0           | 0           | 0.02243663  | 0           | 0           | 0.03051457  | 0           |
| 0           | 0.0302303   | 0           | 0           | 0           | 0.04913626  | 0           | 0.05056709  |
| 0.06128997  | 0           | 0           | 0.02253414  | 0           | 0           | 0.04849334  | 0.07884947  |
| 0           | 0           | 0.1483620   | 0           | 0.02258544  | 0           | 0.02185674  | 7.6028740   |
| 0.1068930   | 0.02351699  | 0           | 0.03974038  | 0           | 0           | 0.02755252  | 0.05003861  |
| 0.0466745   | 0.09048963  | 0.06140031  | 0.03775239  | 0           | 0.09146584  | 0           | 0           |
| 0           | 0.04623549  | 0.02225928  | 0           | 0           | 0.02618395  | 0           | 0.05068664  |
| 0           | 0           | 0.01901924  | 0           | 0           | 0           | 9.98424     | 0.02897454  |
| 0.0407438   | 0.0299735   | 0.03225444  | 0.035437392 | 0.09007973  | 0.03124476  |             |             |
| 0.050382888 | 0.0282913   | 0           | 0.06048762  | 0.02852522  | 0           | 0.1211035   |             |
| 0.05431029  | 0           | 0.06716227  | 0           | 0.04065033  | 0.05873355  | 0.08095898  |             |
| 0.08827786  | 0           | 0.1352422   | 0           | 0.03971136  | 0.03424651  | 0.02203479  |             |
| 0.02691106  | 0.07898261  | 0.07627048  | 0.05256733  | 0.03611103  | 0           | 0           |             |
| 0.0256530   | 0.02558888  | 0           | 0.03172799  | 0           | 0.07656986  | 0           | 0           |
| 0           | 0           | 0.05032121  | 0.03069322  | 0.04632293  | 0.025017204 | 0           | 0.1237879   |
| 0.1275975   | 0.057849389 | 0.1030540   | 0.03119592  | 0.04152668  | 0           | 0.03982357  |             |
| 0.0284116   | 0.04552622  | 0           | 0           | 0.09980589  | 0.04280576  | 0           | 0.04676653  |
| 0           | 0.027565673 | 0.02960308  | 0.02821313  | 0           | 0           | 0           | 0.02134509  |
| 0.08038554  | 0           | 0.02291633  | 0           | 0.09457933  | 0.0490107   | 0.08063789  |             |
| 0.03420815  | 0           | 0.02907436  | 0           | 0.06418657  | 0.04484321  | 0.04352591  |             |
| 0.03919846  | 0.028962022 | 0.04839227  | 0           | 0           | 0.01878786  | 0           | 0           |
| 0.2205798   | 0           | 0           | 0.025507937 | 0           | 0           | 0.04843395  | 0.02375168  |
| 0           | 0.06108969  | 0.0963940   | 0.03353111  | 0           | 0.1170240   | 0           | 0.024047954 |
| 0.03856977  | 0.0566222   | 0           | 0.01859093  | 0           | 0           | 0           | 0.03191193  |
| 0           | 0.02324267  | 0.05146582  | 0.06235652  | 0           | 0           | 0.1912131   | 0.02973831  |
| 0.05776352  | 1.6000190   | 0           | 0.02002663  | 0.02054137  | 0.1658138   | 0.0302624   |             |
| 0           | 0           | 0.02649034  | 0           | 0.05495093  | 0           | 0.01939973  | 0           |
| 0.02463497  | 0.07072479  | 0           | 0           | 0           | 0.04620747  | 0           | 0           |
| 0.05362186  | 0.0205079   | 0.1766677   | 0           | 0.02071106  | 0.04163725  | 0           | 0           |
| 0.02639     | 0.03933217  | 0           | 0           | 0           | 0.109788069 | 0.028909097 | 0.01457637  |
| 0.05748199  | 0.05808563  | 0.03028044  | 0.06220354  | 0.05326334  | 0           | 0.02626557  |             |

|             |             |            |             |             |             |            |            |             |            |            |   |
|-------------|-------------|------------|-------------|-------------|-------------|------------|------------|-------------|------------|------------|---|
| 0           | 0           | 0          | 0           | 0           | 0           | 11.537260  | 0.02114441 | 0           | 0          | 0.02787281 | 0 |
| 0.04323455  | 0.0360113   | 0          | 0           | 0.01989505  | 0           | 0.03575487 | 0.0170516  | 0           |            |            |   |
| 0           | 0.1188157   | 0.01616024 | 0.03487007  | 0.02425751  | 0           | 0          | 0          | 0           | 0          | 0          | 0 |
| 0           | 0.02246536  | 0          | 0.06976939  | 0.06421644  | 0           | 0.04248644 | 0.08101605 |             |            |            |   |
| 0.03896622  | 0.05742142  | 0          | 0           | 0           | 0.0263592   | 0.02161721 | 0.06011044 | 0           |            |            |   |
| 0.05784856  | 0           | 0          | 0           | 0           | 0.02890795  | 0          | 0.1473418  | 0.024757785 |            |            |   |
| 0.026137638 | 0           | 0          | 0.03646564  | 0           | 0           | 0          | 0.05854867 | 0           | 0.02446287 | 0          |   |
| 0           | 0           | 0.1542530  | 0.047235434 | 0.03670235  | 0.03059358  | 0          | 0          | 0.0210502   |            |            |   |
| 0.04453262  | 0           | 0.02924775 | 0           | 0           |             |            |            |             |            |            |   |
| AC092119.2  | 0.1886809   | 0.1633102  | 0.1263716   | 0.042450919 | 0.125843815 |            |            |             |            |            |   |
| 0.04623004  | 0.1948346   | 0.0779034  | 0.07020293  | 0.008627678 | 0.3586467   |            |            |             |            |            |   |
| 0.084596651 | 0.1613850   | 0.39861496 | 0.127589583 | 0.1762923   | 0.3589775   |            |            |             |            |            |   |
| 0.8779425   | 0.02205447  | 1.7418860  | 0.063244578 | 0.7231465   | 1.08349     | 0.4432105  |            |             |            |            |   |
| 0.2831653   | 0.3983955   | 0.7679464  | 3.0246010   | 0.3501658   | 0.399533591 |            |            |             |            |            |   |
| 0.4763544   | 1.935860596 | 0.7224675  | 0.8367417   | 0.2009265   | 0.497198738 |            |            |             |            |            |   |
| 0.5406677   | 0.6764352   | 1.3066440  | 0.5823389   | 0.03289073  | 0.07824446  |            |            |             |            |            |   |
| 0.8531773   | 0.9003803   | 0.1739657  | 0.8029645   | 0.1994641   | 0.4256401   |            |            |             |            |            |   |
| 0.4673712   | 0.1215673   | 0.3890776  | 0.2861586   | 0.4785285   | 0.408520902 |            |            |             |            |            |   |
| 0.4700331   | 0.3684346   | 0.7420013  | 0.3072415   | 0.4478638   | 0.1932601   |            |            |             |            |            |   |
| 1.2068590   | 0.3045847   | 0.1133475  | 0.3092652   | 0.3154453   | 0.108823007 |            |            |             |            |            |   |
| 0.2329519   | 0.7184538   | 0.8448887  | 0.507502558 | 0.5343632   | 0.5264156   |            |            |             |            |            |   |
| 0.5614276   | 0.650359975 | 0.4421845  | 0.7864701   | 0.4991345   | 0.6455978   |            |            |             |            |            |   |
| 1.4671311   | 2.2485250   | 0.2729891  | 0.6637844   | 0.1104790   | 0.05903451  | 0          | 0.05654051 |             |            |            |   |
| 0.3397548   | 0.3243136   | 0.3679865  | 0.7100410   | 0.2841151   | 0.496763148 |            |            |             |            |            |   |
| 0.7779493   | 0.2410719   | 1.2002551  | 0.358724184 | 0.2761583   | 0.1165207   |            |            |             |            |            |   |
| 0.2071661   | 1.1178790   | 0.1735697  | 0.4082692   | 0.4708415   | 0.6359730   | 0.2599068  |            |             |            |            |   |
| 0.2858472   | 0.196842594 | 2.4922670  | 0.453336991 | 0.2182449   | 1.1231290   | 0.1764958  |            |             |            |            |   |
| 0.2242948   | 1.0438850   | 0.1924193  | 0.01561951  | 0.08096776  | 0.2619245   |            |            |             |            |            |   |
| 0.1376985   | 2.1552250   | 0.1634703  | 0.1509172   | 0.3532886   | 0.8311097   |            |            |             |            |            |   |
| 1.3942610   | 0.1220362   | 0.3903505  | 0.5191273   | 0.475185697 | 0.7410294   |            |            |             |            |            |   |
| 0.4395317   | 0.1336452   | 0.04106553 | 0.844139121 | 0.4585265   | 0.1211508   |            |            |             |            |            |   |
| 0.4057651   | 0.3756536   | 0.2240849  | 0.1805663   | 1.1021580   | 0.0902780   | 0.2283839  |            |             |            |            |   |
| 0.6030771   | 0.05997633  | 0.1201484  | 0.8401470   | 0.4639036   | 1.1236080   | 0.3554095  |            |             |            |            |   |
| 0.4077113   | 0.3599232   | 1.3233190  | 0.070922319 | 0.2478854   | 0.9848701   |            |            |             |            |            |   |
| 0.176458376 | 0.3255681   | 0.4867608  | 0.5598857   | 0.4709818   | 1.236862    |            |            |             |            |            |   |
| 0.6362196   | 0.298906932 | 0.2225314  | 0.08400915  | 0.8874285   | 0.2745738   |            |            |             |            |            |   |
| 0.4554903   | 0.6346040   | 0.6790912  | 0.5020434   | 0.06766647  | 0.274485097 |            |            |             |            |            |   |
| 0.4172489   | 0.1884821   | 0.5402145  | 0.06732277  | 0.7113202   | 0.4324892   |            |            |             |            |            |   |
| 1.42027     | 0.9033813   | 0.5431351  | 0.3727555   | 0.3850531   | 0.7809842   |            |            |             |            |            |   |
| 0.2899524   | 0.2539941   | 0.1309695  | 0.6321250   | 0.6899256   | 0.2587564   |            |            |             |            |            |   |
| 0.400136905 | 0.8515014   | 2.1812340  | 0.1864542   | 1.0826320   | 0.5682053   | 0.139062   |            |             |            |            |   |
| 0.16272089  | 0.7007896   | 0.9445157  | 0.1291421   | 0.3617688   | 0.405217317 |            |            |             |            |            |   |
| 0.3695244   | 0.4294533   | 0.5462948  | 0.5402090   | 0.9459895   | 0.3088397   |            |            |             |            |            |   |
| 0.08529198  | 0.1290775   | 0.9059395  | 0.06385308  | 0.6991098   | 0.2891327   |            |            |             |            |            |   |



|                     |                                    |                            |                                     |                     |             |
|---------------------|------------------------------------|----------------------------|-------------------------------------|---------------------|-------------|
| 0.6353960.257388429 | 0.09267828                         | 3.0769420.606851546        | 0.325852285                         | 0.3246686           |             |
| 0.204697687         | 0.6552708                          | 0.1959371                  | 1.4737990.608702513                 | 2.0713160.2583933   |             |
| 1.5134920.300854277 | 0.5205352                          | 1.37322                    | 1.2910710.9327972                   | 0.5045266           |             |
| 0.6109711           | 0.8989261                          | 0.7172307                  | 0.02243664                          | 0.2395531           | 0.6079837   |
| 1.405600162         | 0.5084596                          | 0.388681745                | 0.9127820.5922146                   | 0.06062623          |             |
| 1.1415820.3121056   | 1.15269                            | 0.2355845                  | 0.7322436                           | 0.3610752           | 0.293538012 |
| 0.4916408           | 0.8923048                          | 0.4119647                  | 1.8538730.3431830.6756640.2901712   |                     |             |
| 0.1069787           | 0.05787519                         | 1.2247060.7355362          | 0.4830476                           | 0.02472727          |             |
| 0.1853521           | 1.335556599                        | 0.7333172                  | 0.3682911                           | 1.1481170.2511459   |             |
| 1.8039360.2530163   | 0.4227239                          | 0.1623107                  | 0.2554667                           | 1.0143550.210614399 |             |
| 1.397698713         | 0.3953904                          | 0.2575017                  | 0.2963921                           | 1.80394             | 0.5091841   |
| 0.1093379           | 0.2975825                          | 0.4624181                  | 0.1429547                           | 0.2002154           | 0.5989445   |
| 0.3507011           | 0.33916                            | 0.7466627                  | 0.09841875                          | 0.07755692          | 0.8438498   |
| 0.1457946           | 0.2074085                          | 2.8043770.2776135          | 0.1844210.2921428                   | 0.1575525           |             |
| 0.6476679           | 0.5846717                          | 0.02159604                 | 0.6039617                           | 0.6546431           | 0.9231769   |
| 0.279198908         | 0.2879177                          | 0.4623847                  | 0.4887802                           | 0.4085173           | 0.1723097   |
| 0.323221097         | 0.1699164                          | 0.08208661                 | 1.4253390.4112204                   | 0.0414499           |             |
| 0.5416473           | 0.131038338                        | 0.2840703                  | 1.2110760.9638810.4329440.269533684 |                     |             |
| 0.7823070.1253405   | 0.1805466                          | 1.025375896                | 0.188035157                         | 0.1750338           |             |
| 0.2684292           | 0.1889049                          | 0.5302631                  | 0.9025563                           | 0.6928878           | 0.9094771   |
| 0.3153982           | 0.3286689                          | 0.2333554                  | 0.8266245                           | 0.06252             | 0.548764004 |
| 0.2584062           | 1.3692911.8091240.08463437         | 0.4295212                  | 0.6776896                           | 0.1952405           |             |
| 0.2401019           | 1.34117                            | 0.2522482                  | 1.3122010.4531983                   | 0.8560609           | 0.5594535   |
| 0.1610048           | 0.1279727                          | 1.3149650.2055824          | 2.7048690.04851323                  | 1.308504            |             |
| 1.1044570.7175556   | 0.6871924                          | 0.1737852                  | 0.1562580.5817294                   | 0.222555            |             |
| 0.2661841           | 1.3038650.8429633                  | 0.9948806                  | 0.1285190.07445772                  | 0.1275448           |             |
| 0.5472251           | 0.9553127                          | 1.4221330.9069990.01884835 | 0.3174184                           | 0.2637688           |             |
| 0.2812122           | 1.4135435.6537952.3878530.09082716 | 0.084885819                | 0.214381                            |                     |             |
| 0.8944732           | 0.1735640.6811183                  | 0.2000980.123871948        | 0.170008595                         | 0.2722442           |             |
| 0.398447605         | 0.7845370.6545085                  | 0                          | 1.2110950.1367052                   | 0.0727705           |             |
| 0.6487008           | 0.4446042                          | 0.5053481                  | 0.6693604                           | 0.3730280.307236244 |             |
| 0.4407236           | 1.8215390.7284018                  | 0.2168079                  | 0.4739472                           | 0.6572967           |             |
| 0.1020010.8780209   | 0.3058859                          | 1.365784                   |                                     |                     |             |
| LINC01697           | 0.9973282                          | 0.02252919                 | 0.05494157                          | 0.023424989         | 0.65970197  |
| 0.07936556          | 0.1015394                          | 0.06304928                 | 0.01936946                          | 0.06982608          | 1.090219    |
| 0.00622421          | 0.06679079                         | 0.382313349                | 0.0268212                           | 0.1061241           | 0.2756015   |
| 0.0631905           | 0.3367020.007080634                | 0.00775538                 | 0.5510580.10348                     | 0.2863253           |             |
| 0.01984183          | 0                                  | 0.09114079                 | 0.06134165                          | 0.010136461         | 0.1429583   |
| 0.019247459         | 0                                  | 0.2068145                  | 0.006159664                         | 0.007952492         | 0.009944924 |
| 0.3675808           | 0.1134150                          | 0.004797372                | 0.08718421                          | 0.005257587         | 0.02844344  |
| 0.004586124         | 0                                  | 0.1073320                  | 0.0030962                           | 0.01303992          | 0.029087398 |
| 0.009681293         | 0.01091857                         | 0.003767556                | 0.003922814                         | 0.04739712          | 0.07751925  |
| 0.005335681         | 0.01191365                         | 0                          | 0.1224248                           | 0.008259427         | 0.005358862 |
| 0.005491113         | 0.01684965                         | 0                          | 0.01346971                          | 0                   | 0           |

0.01542062 0.006959121 0.005579224 0.4341158 0.1161215 0.006204959  
0.007095257 0 0.003571072 0.0137662 0 0.0243793 0 0.007945525 0  
0 0.1662285 0.017851484 0.02902626 0.00612359 0.007621136 0.04869955  
0.03004804 0.01365385 0.07328162 0.2818142 0.02078552 0.04301845 0  
1.8095610.039240386 0 0.1180491 0.008657132 0 2.05542 0 0  
0.005957214 0 0.07828641 0 0.2749109 0.005551876 0.1751719  
0.03126938 0.003309126 0.03928239 0 0.06564742 0.045602412 0.02510851  
0.05106096 0 0 0.028230748 0 0.03820152 0.0653061 0.00921292 0  
0.08303245 0.9027156 0.07306437 0.04900984 0.06338782 0.02757979  
0.003683304 2.8985720.03733162 0.005438792 0.01538194 0.003749677  
0.03310174 0.005936791 0 0 0.09201517 0.03245737 0.00520733 0  
0.01113342 0.01050077 0 0 0.074973124 0 0.006180984 0.08321614  
0.05237504 0.3135065 0.06457276 0.4671452 0 0.05808331 0  
0.1169491 0 0.00405575 0.009906563 0.02180645 0 0 0 0.05575986  
0.3510468 0.02833033 0.08242359 0.01066664 0.005839891 0.004380045 0  
0.06492733 0.03807607 0.101517671 0 0.004665249 0.006235634 0.09262182  
0.03954601 0.9933085 0 0 0.005696137 0.01096344 0.1174288  
0.021295655 0.003161373 0 0.01148392 0.07261278 0.004833424 0.01099496  
1.1400250 0.0440172 0.9787497 0.2388151 0.3781862 0.06678477  
0.017215806 0.003788231 0.008027887 0 0 0 0 0.005128897 0.02162414  
0.1178641 0.076774914 0.03698964 0.008265792 0.004218007 0 0.008704192  
0.05412581 0.03957948 0.01574098 0 1.0060751.7464730.003938085  
0.2063474 0.004005716 0.03246712 0.490432149 0.1425142 0.0408533  
0.02189936 0.02766493 0.1635547 0.006666033 0.07654404 0.02706679 0  
0.02072112 0.005775252 0 0 0.09010982 2.09498 0.03497409 0  
0.05063266 0.1067469 0 0.01774239 0 0.04117611 0.08615828  
0.009096562 0.1573535 0.00885259 0.1455336 0 0 0.03421868  
0.006202094 0.01745222 0.005183662 0 0.0117475 0 0 0.192817245  
0.2053475 0 0.01147741 4.1186930 0.01005569 0 0 0.02629477 0  
0.006480503 0.003686125 0.007561739 0.02034659 0.7742484 0.005706261  
1.94904 0 0.009537567 0.0151715 0 0 0.02985339 0 0.1164833  
0.5710916 0.02383397 0.0317404 0.0585796 0.1935436 0.031603224  
0.01114925 0.008505003 0 0 0.03169428 0.003497211 0.0197394  
0.1434389 0.1991707 0.006577303 0.01143631 0.06897422 0 0  
0.1575639 0.04371637 0.06515573 0.051560537 0.03197686 0.007684951  
0.01328374 0.006735908 0.292657348 0.008048833 0.007053469 0.03207393  
0.03901418 0.04579703 0 0.005768525 0.004834471 0.004478122 0.07358208  
1.0406810.1149979 0 0 0.1284014 0.03199677 0.4125377 0.5036582  
0.04888343 0.7285030.008029785 0.007957803 0 0.0536363 0 0  
0.009800444 0.006581083 0 0 0 0 0.2201110 0 0.06438323  
0.02689376 0 0.004421809 0.3343814 0.03148944 0 0.07029501  
0.009120755 0.1027347 0 0.01369559 0.007820104 0.007455955 0.02151651  
0 0.004508957 0.006933848 0.04061582 3.9201790.4177834 0.05531999  
0.03681228 0.005323837 0 0.515252521 0.01075439 0 0.05320831

|             |             |             |             |             |             |             |            |          |
|-------------|-------------|-------------|-------------|-------------|-------------|-------------|------------|----------|
| 0.06264171  | 0.007748546 | 0           | 0.024054624 | 0           | 0           | 0           | 0.03523577 | 1.180203 |
| 2.4376980   | 0.0179609   | 0.0107082   | 0.04052398  | 0.007111264 | 0.04213852  | 0           |            |          |
| 0.06624796  | 0.00869421  | 0.1688870   | 0           | 0.05583084  | 0.2247224   | 0.01229509  |            |          |
| 0.003752369 | 0.01076675  | 0           | 0.06483079  |             |             |             |            |          |
| RORA-AS1    | 0.06545108  | 0.05979751  | 0.2523933   | 0.015543792 | 0.053758673 |             |            |          |
| 0.09028027  | 0.08323055  | 0.02282003  | 0.07711633  | 0.05686385  | 0.02764669  |             |            |          |
| 0.037171004 | 0.1255717   | 0.052127325 | 0.053392105 | 0.07041931  | 0.04571926  |             |            |          |
| 0.1537449   | 0.1049808   | 0.07752355  | 0.077191934 | 0.4665290   | 0.1220707   |             |            |          |
| 0.1345783   | 0.3159880   | 0.1317591   | 0.2234117   | 0.09827515  | 0.1343220   | 0.100891637 |            |          |
| 0.1468813   | 0.091956719 | 0.1877367   | 0.1819135   | 0.2207132   | 0.047492311 |             |            |          |
| 0.1088837   | 0.1165567   | 0.1876234   | 0.05017146  | 0.01204324  | 0.1814495   |             |            |          |
| 0.1214884   | 0.1255933   | 0.07077679  | 0.5390235   | 0.1460712   | 0.1154459   |             |            |          |
| 0.1264891   | 0.05341559  | 0.07123216  | 0.04930804  | 0.1168117   | 0.028951676 |             |            |          |
| 0.09179036  | 0.1349057   | 0.1086762   | 0.09749938  | 0.1717984   | 0.2358798   |             |            |          |
| 0.1402864   | 0.1805667   | 0.2490194   | 0.3019741   | 0.3234089   | 0.199232691 |             |            |          |
| 0.03655606  | 0.02466266  | 0.1280126   | 0.087447858 | 0.07826478  | 0.1542015   |             |            |          |
| 0.1251307   | 0.195393023 | 0.08095494  | 0.0500823   | 0.02215305  | 0.2488332   |             |            |          |
| 0.06139466  | 0.1662396   | 0.02221277  | 0.07201503  | 0           | 0.06176007  | 0.028248601 |            |          |
| 0.04830659  | 0.1066323   | 0.03653858  | 0           | 0.3258516   | 0.1809241   | 0.047450704 |            |          |
| 0.02476985  | 0.05230854  | 0.05170403  | 0.071072753 | 0.2166811   | 0.07314021  |             |            |          |
| 0.1668827   | 0.0430865   | 0.03738479  | 0.05436054  | 0.2121882   | 0.03175463  |             |            |          |
| 0.09102954  | 0.2664214   | 0.104109365 | 1.9452070   | 0.048821612 | 0.06392988  |             |            |          |
| 0.1174983   | 0.1292511   | 0.08959372  | 0.1383301   | 0.1831858   | 0.04575382  |             |            |          |
| 0.01185883  | 0.09085835  | 0.04583595  | 0.2485528   | 0           | 0.09946748  | 0.1912276   |            |          |
| 0.1106612   | 0.1119853   | 0.02234234  | 0.04083725  | 0.2494842   | 0.075649384 |             |            |          |
| 0.03570193  | 0.1270568   | 0.2691448   | 0.02004869  | 0.149861455 | 0.1151271   |             |            |          |
| 0.02534885  | 0.3900083   | 0.1742287   | 0.1641014   | 0.2148771   | 0.3274208   |             |            |          |
| 0.06611223  | 0.1184685   | 0.1472148   | 0.1317653   | 0.1613092   | 1.962164    |             |            |          |
| 0.01061641  | 0.05413414  | 0.03062033  | 0.05225053  | 0.06589458  | 0.3072727   |             |            |          |
| 0.168797558 | 0.0825141   | 0.1373787   | 0.092302638 | 0.1658570   | 0.1887162   |             |            |          |
| 0.05540737  | 0.08361421  | 0.1116711   | 0.2662373   | 0.019899546 | 0.1629638   |             |            |          |
| 0.03691286  | 0.3185687   | 0.1563920   | 0.07532088  | 0.1779825   | 0.1940725   |             |            |          |
| 0.05106328  | 0.1156246   | 0.04020209  | 0.07275214  | 0.08783657  | 0.06458921  |             |            |          |
| 0.0493017   | 0.1808725   | 0.3353504   | 0.2311310   | 0.2646251   | 0.05549969  |             |            |          |
| 0.01091903  | 0.02819814  | 0.0984468   | 0.1061687   | 0.0697517   | 0.02615765  |             |            |          |
| 0.3366667   | 0.1527485   | 0.06316401  | 0.161670381 | 0.1176547   | 0.1114435   |             |            |          |
| 0.1737831   | 0.06453275  | 0.08996911  | 0.2630806   | 0.137496324 | 0.06284095  |             |            |          |
| 0.1474085   | 0.09457315  | 0.1558411   | 0.063588867 | 0.02517298  | 0.02734752  |             |            |          |
| 0.3200493   | 0.2586647   | 0.1635696   | 0.1386197   | 0.08328116  | 0.08340511  |             |            |          |
| 0.08762363  | 0.03117385  | 0.09751826  | 0.0941054   | 0.1218674   | 0.068541909 |             |            |          |
| 0.030164444 | 0.1917703   | 0.050500963 | 0.162700624 | 0.1653988   | 0.12491988  |             |            |          |
| 0.02041986  | 0.05739532  | 0.08603038  | 0.216513929 | 0.02945364  | 0.0329089   |             |            |          |
| 0.2099163   | 0.137700678 | 0.1212901   | 0.1257043   | 0.3545532   | 0.3697538   |             |            |          |
| 0.2216844   | 0.09587684  | 0.02057188  | 0.1881461   | 0.03286153  | 0.0956886   |             |            |          |

|            |             |             |             |             |             |
|------------|-------------|-------------|-------------|-------------|-------------|
| 0.03590625 | 0.07428275  | 0.1773116   | 0.132153702 | 0.1089859   | 0.08260754  |
| 0.07399616 | 0.07961915  | 0.06348907  | 0.04490083  | 0.01327099  | 0.07218554  |
| 0.1264627  | 0.214963249 | 0.08781403  | 0.05125107  | 0.2543654   | 0.4351363   |
| 0.1559912  | 0.0549779   | 0.1652759   | 0.2462190   | 0.04238306  | 0.1474315   |
| 0.08196796 | 0.01071953  | 0.03621647  | 0           | 0.079301554 | 0.05652859  |
| 0.08298656 | 0.1214470   | 0.07492984  | 0.1234631   | 0.1852884   | 0.3302064   |
| 0.05546946 | 0.3975512   | 0.2004464   | 0.061694709 | 0.140739542 | 0.2129056   |
| 0.07542928 | 0.1370863   | 0.07339214  | 0.1165265   | 0.1100964   | 0.03268877  |
| 0.2751428  | 0.4920350   | 0.04189183  | 0.1161048   | 0.1834463   | 0.08279102  |
| 0.3037749  | 0.08316213  | 0           | 0.03128945  | 0.09706184  | 0.047465323 |
| 0.1006714  | 0.08529782  | 0.1426277   | 0.1153786   | 0.1580997   | 0.8858601   |
| 0.06326069 | 0.1173428   | 0.05182779  | 0.1090418   | 0.070775467 | 0.06658339  |
| 0.03386127 | 0.05965711  | 0.1308846   | 0.09463918  | 0.013923571 | 0.0851383   |
| 0.06762772 | 0.02427446  | 0.1702119   | 0.1973044   | 0.1067926   | 0.038384708 |
| 0.07235821 | 0.1838681   | 0.02900826  | 0.1441149   | 0.071058399 | 0           |
| 0.03059637 | 0.080453733 | 0.14829401  | 0.1014762   | 0.0982878   | 0.02128285  |
| 0.110949   | 0.09116669  | 0.07806375  | 0.2411476   | 0.06736679  | 0.08023009  |
| 0.09765165 | 0.03363068  | 0.03662763  | 0.131044535 | 0.07792054  | 2.3397650   |
| 0.1019119  | 0.2711594   | 0.06880699  | 0.05838641  | 0.04085092  | 0.04795391  |
| 0.01584134 | 0.3298678   | 0.1156697   | 0           | 0.1385032   | 0.1950943   |
| 0.05240301 | 0.1563802   | 0.04105957  | 0.3047423   | 0.07697543  | 0.06388278  |
| 0.2844181  | 0.01281656  | 0.06424386  | 0.1041268   | 0.14964     | 0.03993854  |
| 0.03761101 | 0.1594894   | 0.1070084   | 0.2541895   | 0.03834575  | 0.1098030   |
| 0.06361454 | 0.1245379   | 0.02968466  | 0.04283222  | 0.0525987   | 0.10771     |
| 0.09662092 | 0.2324513   | 0.09658136  | 0.1980162   | 0.1211361   | 0.08549452  |
| 0.1165779  | 0.1045226   | 0.186490308 | 0.1712674   | 0.1007752   | 0.3283523   |
| 0.04676207 | 0.1156859   | 0.090713691 | 0.038307815 | 0.03322824  | 0.101492334 |
| 0.04008354 | 0.3507136   | 0           | 0.1267010   | 0.07865919  | 0.1278988   |
| 0.06274317 | 0.0592121   | 0.1693366   | 0.09419836  | 0.0605755   | 0.0941354   |
| 0.04483853 | 0.05926911  | 0.06350896  | 0.06941603  | 0.1060603   | 0.01493944  |
| 0.01071651 | 0.08252848  | 0.1613207   |             |             |             |
