# Supplementary material for: Ferroptosis‐Related Long Noncoding RNAs Have Excellent Predictive Ability for Multiomic Characteristics of Bladder Cancer
Source: Hindawi journal article supplement (doi:10.1155/2022/9316847), 2022-01-01
Supplement: f1 [file 9316847.f1.zip]

| ID                           | StromalScore      | ImmuneScore       | ESTIMATEScore |  |
|------------------------------|-------------------|-------------------|---------------|--|
| TCGA-CF-A47X-01A-31R-A23W-07 | -1772.23869809142 | -602.429051032574 | -             |  |
| 2374.66774912399             |                   |                   |               |  |
| TCGA-ZF-AA51-01A-21R-A39I-07 | 64.3441392254353  | 1450.54662334637  |               |  |
| 1514.89076257181             |                   |                   |               |  |
| TCGA-BL-A0C8-01A-11R-A10U-07 | -625.200675069726 | -211.674358804004 | -             |  |
| 836.875033873729             |                   |                   |               |  |
| TCGA-BT-A42C-01A-11R-A23N-07 | -1729.01589157274 | -438.730301824338 | -             |  |
| 2167.74619339708             |                   |                   |               |  |
| TCGA-G2-A3IB-01A-11R-A20F-07 | -1436.34728994    | -218.627253281216 | -             |  |
| 1654.97454322122             |                   |                   |               |  |
| TCGA-2F-A9KP-01A-11R-A38B-07 | -1630.63052327507 | -674.193999823542 | -             |  |
| 2304.82452309861             |                   |                   |               |  |
| TCGA-DK-A3IT-01A-31R-A20F-07 | -53.3954836772599 | 529.93283129294   |               |  |
| 476.537347615681             |                   |                   |               |  |
| TCGA-FD-A43P-01A-31R-A23W-07 | -257.918314092308 | 1960.04947408487  |               |  |
| 1702.13115999257             |                   |                   |               |  |
| TCGA-DK-A3IV-01A-22R-A21D-07 | -1488.33800517209 | 1268.08811578202  | -             |  |
| 220.249889390063             |                   |                   |               |  |
| TCGA-2F-A9KW-01A-11R-A38B-07 | -18.8384464968865 | 357.681108801005  |               |  |
| 338.842662304119             |                   |                   |               |  |
| TCGA-GU-A762-01A-11R-A33J-07 | 436.953392960058  | 2383.71665033574  |               |  |
| 2820.6700432958              |                   |                   |               |  |
| TCGA-XF-AAME-01A-12R-A42T-07 | 1564.83999742588  | 2374.88671678768  |               |  |
| 3939.72671421356             |                   |                   |               |  |
| TCGA-XF-AAN0-01A-11R-A42T-07 | -433.471711504356 | 926.142039176469  |               |  |
| 492.670327672113             |                   |                   |               |  |
| TCGA-CF-A47W-01A-11R-A23W-07 | -1628.41563670245 | -364.794427590086 | -             |  |
| 1993.21006429253             |                   |                   |               |  |
| TCGA-GC-A3I6-01A-11R-A20F-07 | -483.413782656876 | 834.807380461024  |               |  |
| 351.393597804149             |                   |                   |               |  |
| TCGA-FD-A6TA-01A-12R-A33J-07 | 538.860345099576  | 1265.02252638968  |               |  |
| 1803.88287148925             |                   |                   |               |  |
| TCGA-DK-A1A7-01A-11R-A13Y-07 | -1073.92465083149 | 58.2864381036851  | -             |  |
| 1015.6382127278              |                   |                   |               |  |
| TCGA-FD-A3SR-01A-11R-A22U-07 | 361.358864769324  | 993.789629045046  |               |  |
| 1355.14849381437             |                   |                   |               |  |
| TCGA-GU-AATP-01A-11R-A39I-07 | 528.365798725223  | 759.807122468201  |               |  |
| 1288.17292119342             |                   |                   |               |  |
| TCGA-DK-AA6X-01A-12R-A42T-07 | -559.782348043752 | 878.575438424505  |               |  |
| 318.793090380753             |                   |                   |               |  |
| TCGA-XF-A9T3-01A-11R-A42T-07 | 517.884018403117  | 1031.17078641073  |               |  |
| 1549.05480481385             |                   |                   |               |  |
| TCGA-PQ-A6FN-01A-11R-A31N-07 | -516.939276659981 | 705.863785487601  |               |  |

|                              |                   |                   |   |
|------------------------------|-------------------|-------------------|---|
| 188.92450882762              |                   |                   |   |
| TCGA-DK-A3WW-01A-22R-A23N-07 | -432.686228255479 | 1973.5087331237   |   |
| 1540.82250486822             |                   |                   |   |
| TCGA-XF-AAMY-01A-11R-A42T-07 | 186.511652334003  | 211.246976159031  |   |
| 397.758628493034             |                   |                   |   |
| TCGA-K4-A3WS-01A-11R-A22U-07 | 1127.38075925364  | 1241.7727865668   |   |
| 2369.15354582044             |                   |                   |   |
| TCGA-UY-A9PA-01A-11R-A38B-07 | -1625.69938043669 | 831.079793038577  | - |
| 794.61958739811              |                   |                   |   |
| TCGA-G2-AA3F-01A-12R-A42T-07 | -1119.97605350379 | -443.460647735005 | - |
| 1563.4367012388              |                   |                   |   |
| TCGA-FJ-A871-01A-11R-A352-07 | -842.415544805501 | -485.807087926978 | - |
| 1328.22263273248             |                   |                   |   |
| TCGA-ZF-A9RN-01A-11R-A42T-07 | -1127.82177767135 | 1053.21311558385  | - |
| 74.6086620875008             |                   |                   |   |
| TCGA-GC-A3RB-01A-12R-A220-07 | -1314.19503076671 | -180.545891778136 | - |
| 1494.74092254485             |                   |                   |   |
| TCGA-UY-A9PF-01A-11R-A38B-07 | -445.634966376598 | 475.539642043842  |   |
| 29.904675667244              |                   |                   |   |
| TCGA-YC-A89H-01A-11R-A36F-07 | -646.889902122956 | 366.617780491821  | - |
| 280.272121631135             |                   |                   |   |
| TCGA-XF-AAMQ-01A-11R-A42T-07 | -687.052164908733 | 1151.38113551108  |   |
| 464.328970602352             |                   |                   |   |
| TCGA-CF-A1HR-01A-11R-A13Y-07 | -800.926656101546 | 394.753596135759  | - |
| 406.173059965786             |                   |                   |   |
| TCGA-E7-A3X6-01A-12R-A22U-07 | -640.818854292803 | 1095.32963835949  |   |
| 454.510784066687             |                   |                   |   |
| TCGA-DK-A6AW-01A-11R-A30C-07 | -1108.43371356432 | -292.640683425998 | - |
| 1401.07439699032             |                   |                   |   |
| TCGA-GC-A3BM-01A-11R-A22U-07 | -1498.32829552124 | -25.2754104678103 | - |
| 1523.60370598905             |                   |                   |   |
| TCGA-GV-A6ZA-01A-12R-A33J-07 | -1345.99152456011 | 400.943369803567  | - |
| 945.048154756548             |                   |                   |   |
| TCGA-G2-A2EJ-01A-11R-A180-07 | -1304.13732027335 | 409.712642913094  | - |
| 894.424677360258             |                   |                   |   |
| TCGA-FD-A43N-01A-11R-A23W-07 | -40.2218988865042 | 362.428193085891  |   |
| 322.206294199386             |                   |                   |   |
| TCGA-UY-A8OD-01A-11R-A36F-07 | 556.062493748461  | 982.297243423872  |   |
| 1538.35973717233             |                   |                   |   |
| TCGA-2F-A9KT-01A-11R-A38B-07 | -936.774492675418 | -92.6058276869062 | - |
| 1029.38032036232             |                   |                   |   |
| TCGA-BT-A20Q-01A-11R-A14Y-07 | 415.792071119799  | 1057.2686425733   |   |
| 1473.0607136931              |                   |                   |   |
| TCGA-CU-A0YR-01A-12R-A10U-07 | 132.007546226705  | 1301.81023028688  |   |

|                              |                   |                     |
|------------------------------|-------------------|---------------------|
| 1433.81777651358             |                   |                     |
| TCGA-SY-A9G5-01A-11R-A38B-07 | 782.544867388454  | 1708.13074419519    |
| 2490.67561158365             |                   |                     |
| TCGA-4Z-AA84-01A-11R-A39I-07 | -1002.54691088598 | -335.878454891326 - |
| 1338.4253657773              |                   |                     |
| TCGA-4Z-AA7Q-01A-11R-A39I-07 | -495.605887182969 | 1804.00124132829    |
| 1308.39535414532             |                   |                     |
| TCGA-FD-A5BT-01A-11R-A26T-07 | 1480.22858209892  | 2385.29578281764    |
| 3865.52436491656             |                   |                     |
| TCGA-CF-A27C-01A-11R-A16R-07 | -2154.7783267956  | -413.555572104406 - |
| 2568.3338989                 |                   |                     |
| TCGA-E7-A6MF-01A-12R-A32O-07 | -1829.58243603786 | -280.732073207146 - |
| 2110.31450924501             |                   |                     |
| TCGA-FT-A61P-01A-11R-A30C-07 | 665.471639835075  | 1202.08893064583    |
| 1867.5605704809              |                   |                     |
| TCGA-DK-AA77-01A-11R-A39I-07 | -1416.70372058611 | 505.000899082875 -  |
| 911.702821503238             |                   |                     |
| TCGA-ZF-AA5N-01A-11R-A42T-07 | -1527.70055102854 | -157.085023827182 - |
| 1684.78557485572             |                   |                     |
| TCGA-DK-AA6U-01A-11R-A39I-07 | -1854.50461137816 | -396.647392254239 - |
| 2251.15200363239             |                   |                     |
| TCGA-BT-A20O-01A-21R-A14Y-07 | 1047.31838300991  | 3086.7190490448     |
| 4134.03743205471             |                   |                     |
| TCGA-GD-A3OS-01A-12R-A22O-07 | -395.648328054756 | -49.7914093022977 - |
| 445.439737357054             |                   |                     |
| TCGA-XF-A9SZ-01A-11R-A39I-07 | 627.973212500302  | 845.836871465156    |
| 1473.81008396546             |                   |                     |
| TCGA-4Z-AA82-01A-11R-A39I-07 | -176.62895426241  | 334.78769025177     |
| 158.158735989359             |                   |                     |
| TCGA-DK-AA76-01A-11R-A39I-07 | -1808.12941570949 | -1096.84214558378 - |
| 2904.97156129327             |                   |                     |
| TCGA-DK-A3IL-01A-11R-A20F-07 | -771.938911922325 | -257.122150814334 - |
| 1029.06106273666             |                   |                     |
| TCGA-E7-A678-01A-11R-A30C-07 | -1881.91492363438 | 18.3914334381903 -  |
| 1863.52349019619             |                   |                     |
| TCGA-ZF-A9R1-01A-11R-A39I-07 | -1205.23281809858 | -139.801117845579 - |
| 1345.03393594416             |                   |                     |
| TCGA-XF-A9SH-01A-11R-A39I-07 | -874.429295631732 | 142.129309401516 -  |
| 732.299986230216             |                   |                     |
| TCGA-FD-A5BU-01A-31R-A26T-07 | 488.458718747592  | 1313.44550513484    |
| 1801.90422388243             |                   |                     |
| TCGA-C4-A0F7-01A-11R-A084-07 | -943.004137572052 | -441.07233417505 -  |
| 1384.0764717471              |                   |                     |
| TCGA-C4-A0F0-01A-12R-A10U-07 | -175.336608722605 | 855.420613210572    |

|                              |                   |                   |   |
|------------------------------|-------------------|-------------------|---|
| 680.084004487967             |                   |                   |   |
| TCGA-FD-A3N5-01A-11R-A21D-07 | -900.477298493645 | 367.209423791031  | - |
| 533.267874702615             |                   |                   |   |
| TCGA-ZF-AA5H-01A-11R-A39I-07 | -186.552659792117 | 1291.88632751138  |   |
| 1105.33366771927             |                   |                   |   |
| TCGA-DK-A3WX-01A-22R-A22U-07 | 118.433107187052  | 1445.59972516426  |   |
| 1564.03283235132             |                   |                   |   |
| TCGA-YF-AA3L-01A-11R-A38B-07 | -1289.55461266317 | -118.319795296147 | - |
| 1407.87440795932             |                   |                   |   |
| TCGA-BT-A2LA-01A-11R-A18C-07 | -1390.28208103529 | -1428.58349447607 | - |
| 2818.86557551136             |                   |                   |   |
| TCGA-4Z-AA87-01A-11R-A39I-07 | -806.492710775063 | 704.33225437673   | - |
| 102.160456398333             |                   |                   |   |
| TCGA-BT-A2LB-01A-11R-A18C-07 | 231.692807708646  | 1020.59184216397  |   |
| 1252.28464987262             |                   |                   |   |
| TCGA-XF-A8HB-01A-11R-A36F-07 | -1906.58662517618 | -385.181903710974 | - |
| 2291.76852888715             |                   |                   |   |
| TCGA-DK-A2I6-01A-12R-A18C-07 | -936.359882672186 | -228.128482391235 | - |
| 1164.48836506342             |                   |                   |   |
| TCGA-ZF-AA4X-01A-11R-A38B-07 | -2432.85542937504 | -358.01958120171  | - |
| 2790.87501057675             |                   |                   |   |
| TCGA-BT-A20P-01A-11R-A14Y-07 | -1490.13142918067 | -373.796045650345 | - |
| 1863.92747483101             |                   |                   |   |
| TCGA-BT-A20W-01A-21R-A14Y-07 | -601.658466636404 | 609.619273929175  |   |
| 7.96080729277082             |                   |                   |   |
| TCGA-FD-A5BX-01A-11R-A26T-07 | 820.859564215631  | 1854.84338592508  |   |
| 2675.70295014072             |                   |                   |   |
| TCGA-BL-A13J-01A-11R-A10U-07 | -99.876947942544  | -92.4877997214408 | - |
| 192.364747663985             |                   |                   |   |
| TCGA-CF-A8HX-01A-11R-A36F-07 | -1588.31639735985 | -473.644692004299 | - |
| 2061.96108936415             |                   |                   |   |
| TCGA-PQ-A6FI-01A-11R-A31N-07 | -1190.29295404381 | 474.266540076472  | - |
| 716.026413967338             |                   |                   |   |
| TCGA-FJ-A3Z7-01A-12R-A23N-07 | 131.687557044745  | 363.626546499494  |   |
| 495.314103544238             |                   |                   |   |
| TCGA-E7-A7PW-01A-11R-A352-07 | -1856.24600504095 | -128.784586516948 | - |
| 1985.0305915579              |                   |                   |   |
| TCGA-4Z-AA7S-01A-11R-A39I-07 | -1368.7235608233  | -597.177547679784 | - |
| 1965.90110850309             |                   |                   |   |
| TCGA-CF-A3MH-01A-11R-A20F-07 | -1948.40377192882 | -105.080405193428 | - |
| 2053.48417712225             |                   |                   |   |
| TCGA-DK-A6B2-01A-11R-A30C-07 | 627.697874126739  | 1292.89255090424  |   |
| 1920.59042503098             |                   |                   |   |
| TCGA-4Z-AA86-01A-11R-A39I-07 | 649.033347932914  | 1865.05391631594  |   |

|                              |                   |                     |
|------------------------------|-------------------|---------------------|
| 2514.08726424885             |                   |                     |
| TCGA-BL-A0C8-01B-04R-A277-07 | -903.814619824186 | -841.675248087716 - |
| 1745.4898679119              |                   |                     |
| TCGA-5N-A9KI-01A-31R-A42T-07 | -7.61895828693348 | 747.177131807088    |
| 739.558173520154             |                   |                     |
| TCGA-GU-AATO-01A-11R-A39I-07 | -87.0765586366839 | 1160.9561159361     |
| 1073.87955729941             |                   |                     |
| TCGA-CF-A9FH-01A-11R-A38B-07 | -1919.51909940743 | -249.268545211843 - |
| 2168.78764461927             |                   |                     |
| TCGA-FD-A6TG-01A-11R-A32O-07 | 538.620550088055  | 853.169437982637    |
| 1391.78998807069             |                   |                     |
| TCGA-4Z-AA7O-01A-31R-A39I-07 | -613.506660434985 | 655.126392392588    |
| 41.6197319576032             |                   |                     |
| TCGA-GV-A3QI-01A-11R-A22O-07 | -1848.14536149155 | -1152.82072409293 - |
| 3000.96608558448             |                   |                     |
| TCGA-DK-A6AV-01A-12R-A30C-07 | -982.624237339837 | 332.311850279071 -  |
| 650.312387060766             |                   |                     |
| TCGA-DK-A1A3-01A-11R-A13Y-07 | 234.876844970719  | 675.634192571103    |
| 910.511037541822             |                   |                     |
| TCGA-GD-A6C6-01A-21R-A31N-07 | -1022.44361443498 | 171.224473007284 -  |
| 851.219141427692             |                   |                     |
| TCGA-GC-A3RD-01A-12R-A22U-07 | -1158.04707845745 | -101.318992024398 - |
| 1259.36607048185             |                   |                     |
| TCGA-BT-A20R-01A-12R-A16R-07 | 856.174396533834  | 598.027717692392    |
| 1454.20211422623             |                   |                     |
| TCGA-XF-A9T0-01A-11R-A39I-07 | -198.49375700566  | 646.955169259925    |
| 448.461412254264             |                   |                     |
| TCGA-YF-AA3M-01A-11R-A42T-07 | -1497.93343888491 | -109.463571953721 - |
| 1607.39701083863             |                   |                     |
| TCGA-4Z-AA7Y-01A-11R-A39I-07 | -1716.5571124156  | -470.628695568016 - |
| 2187.18580798361             |                   |                     |
| TCGA-FD-A62O-01A-11R-A30C-07 | -861.528937774776 | -416.111606643086 - |
| 1277.64054441786             |                   |                     |
| TCGA-BL-A3JM-01A-12R-A21D-07 | -569.674823135513 | -173.372752284253 - |
| 743.047575419767             |                   |                     |
| TCGA-FJ-A3ZF-01A-11R-A23N-07 | -1833.72550512973 | -1010.51234510936 - |
| 2844.23785023908             |                   |                     |
| TCGA-CU-A0YO-01A-11R-A10U-07 | -332.658429454169 | 880.150664640368    |
| 547.492235186198             |                   |                     |
| TCGA-CF-A5UA-01A-11R-A28M-07 | -1544.77020941995 | -217.346377306724 - |
| 1762.11658672668             |                   |                     |
| TCGA-K4-AAQO-01A-11R-A38B-07 | 452.013034635691  | 845.118753760633    |
| 1297.13178839632             |                   |                     |
| TCGA-XF-AAMJ-01A-11R-A42T-07 | 1198.45816053696  | 622.59367210835     |

|                              |                   |                   |   |
|------------------------------|-------------------|-------------------|---|
| 1821.05183264531             |                   |                   |   |
| TCGA-GU-A763-01A-11R-A32O-07 | -1940.23038134644 | -41.6755553991329 | - |
| 1981.90593674557             |                   |                   |   |
| TCGA-G2-A2EC-01A-11R-A180-07 | 361.143434656282  | 971.885925806413  |   |
| 1333.02936046269             |                   |                   |   |
| TCGA-FD-A3B7-01A-31R-A20F-07 | 1295.6682256484   | 2136.02755235085  |   |
| 3431.69577799925             |                   |                   |   |
| TCGA-FD-A5C0-01A-11R-A28M-07 | -428.897133366416 | 212.367709616357  | - |
| 216.529423750059             |                   |                   |   |
| TCGA-FD-A5BS-01A-21R-A26T-07 | 1668.8212482347   | 3164.37053676924  |   |
| 4833.19178500395             |                   |                   |   |
| TCGA-CU-A0YN-01A-21R-A10U-07 | -111.821500959118 | 916.942435966247  |   |
| 805.12093500713              |                   |                   |   |
| TCGA-FD-A5BZ-01A-11R-A28M-07 | 1018.37986315376  | 157.720133847225  |   |
| 1176.09999700098             |                   |                   |   |
| TCGA-UY-A9PE-01A-11R-A38B-07 | -515.070402271291 | -246.463799383914 | - |
| 761.534201655205             |                   |                   |   |
| TCGA-GV-A40E-01A-12R-A23N-07 | -584.006482953346 | 413.859054461905  | - |
| 170.14742849144              |                   |                   |   |
| TCGA-BT-A2LD-01A-12R-A20F-07 | -602.038937200312 | 222.210429842253  | - |
| 379.828507358059             |                   |                   |   |
| TCGA-UY-A9PD-01A-11R-A38B-07 | -253.961053032468 | -35.5836300214698 | - |
| 289.544683053938             |                   |                   |   |
| TCGA-G2-AA3B-01A-11R-A39I-07 | -1707.76953223638 | 306.223249188435  | - |
| 1401.54628304795             |                   |                   |   |
| TCGA-K4-A54R-01A-11R-A26T-07 | 250.009467474398  | 1384.52457993991  |   |
| 1634.53404741431             |                   |                   |   |
| TCGA-DK-A1AA-01A-11R-A13Y-07 | -1422.60657077233 | 70.9970010821334  | - |
| 1351.60956969019             |                   |                   |   |
| TCGA-CU-A5W6-01A-11R-A28M-07 | -942.174125293519 | 162.680335552978  | - |
| 779.493789740541             |                   |                   |   |
| TCGA-DK-AA6R-01A-11R-A42T-07 | -896.952919698162 | 204.253299429789  | - |
| 692.699620268373             |                   |                   |   |
| TCGA-BT-A3PH-01A-11R-A220-07 | -992.095740309142 | -376.76183276733  | - |
| 1368.85757307647             |                   |                   |   |
| TCGA-BL-A13I-01B-04R-A277-07 | 1142.45976337523  | 2074.86217943835  |   |
| 3217.32194281358             |                   |                   |   |
| TCGA-CF-A3MF-01A-12R-A21D-07 | -1290.97814361958 | -264.898707226835 | - |
| 1555.87685084641             |                   |                   |   |
| TCGA-CF-A47T-01A-11R-A23W-07 | -1292.57828525093 | -517.354105585169 | - |
| 1809.9323908361              |                   |                   |   |
| TCGA-YC-A8S6-01A-31R-A38B-07 | 607.974779097187  | 1324.76171792077  |   |
| 1932.73649701796             |                   |                   |   |
| TCGA-DK-A3IS-01A-21R-A21D-07 | -1814.67839483102 | -171.590681531205 | - |

|                              |                   |                   |   |
|------------------------------|-------------------|-------------------|---|
| 1986.26907636223             |                   |                   |   |
| TCGA-XF-A9SJ-01A-11R-A39I-07 | 217.375664309722  | 1411.41137534361  |   |
| 1628.78703965333             |                   |                   |   |
| TCGA-DK-AA6T-01A-11R-A39I-07 | -123.947939194131 | 2167.22856111362  |   |
| 2043.28062191949             |                   |                   |   |
| TCGA-BT-A20N-01A-11R-A14Y-07 | -1019.45064211244 | -670.939395641637 | - |
| 1690.39003775408             |                   |                   |   |
| TCGA-C4-A0F6-01A-11R-A10U-07 | -373.917212243134 | 113.835096354957  | - |
| 260.082115888178             |                   |                   |   |
| TCGA-CF-A7I0-01A-22R-A352-07 | -471.129485076529 | 101.192747905829  | - |
| 369.9367371707               |                   |                   |   |
| TCGA-FD-A3B6-01A-21R-A20F-07 | -180.940081292244 | 1718.70246422347  |   |
| 1537.76238293123             |                   |                   |   |
| TCGA-GC-A3YS-01A-11R-A23N-07 | 486.693931652269  | 936.46362806001   |   |
| 1423.15755971228             |                   |                   |   |
| TCGA-XF-A9T2-01A-11R-A42T-07 | -164.244668498083 | -72.2636552382903 | - |
| 236.508323736373             |                   |                   |   |
| TCGA-UY-A78O-01A-12R-A33J-07 | -869.453721166465 | -27.2651679011085 | - |
| 896.718889067574             |                   |                   |   |
| TCGA-GC-A3OO-01A-11R-A22U-07 | -24.0139122263739 | 415.472522403669  |   |
| 391.458610177295             |                   |                   |   |
| TCGA-E7-A6ME-01A-22R-A32O-07 | -1589.43467695471 | 211.81862685483   | - |
| 1377.61605009988             |                   |                   |   |
| TCGA-XF-AAN5-01A-11R-A42T-07 | -563.182557959682 | 1453.0727814455   |   |
| 889.89022348582              |                   |                   |   |
| TCGA-FD-A3SN-01A-12R-A22U-07 | -291.831287098834 | 319.256204416089  |   |
| 27.4249173172552             |                   |                   |   |
| TCGA-ZF-A9R2-01A-11R-A39I-07 | -2418.60351026673 | -747.304096141287 | - |
| 3165.90760640802             |                   |                   |   |
| TCGA-ZF-AA4T-01A-11R-A38B-07 | -1758.12203716159 | -371.221484529669 | - |
| 2129.34352169126             |                   |                   |   |
| TCGA-E7-A4IJ-01A-31R-A26T-07 | -1334.51874542549 | 539.823778542714  | - |
| 794.694966882781             |                   |                   |   |
| TCGA-FD-A6TE-01A-12R-A33J-07 | -1905.55464847937 | -88.8401841536066 | - |
| 1994.39483263298             |                   |                   |   |
| TCGA-H4-A2HO-01A-11R-A180-07 | -793.78652913317  | 550.632754266554  | - |
| 243.153774866615             |                   |                   |   |
| TCGA-FD-A6TB-01A-12R-A33J-07 | 489.24396114357   | 1965.66752953793  |   |
| 2454.9114906815              |                   |                   |   |
| TCGA-XF-AAN3-01A-11R-A42T-07 | 283.191439533779  | 739.142662585179  |   |
| 1022.33410211896             |                   |                   |   |
| TCGA-XF-AAMH-01A-11R-A42T-07 | -863.885897384193 | -588.474104093356 | - |
| 1452.36000147755             |                   |                   |   |
| TCGA-FD-A3B8-01A-31R-A20F-07 | 1656.25973688676  | 2689.67969567099  |   |

|                               |                   |                   |   |
|-------------------------------|-------------------|-------------------|---|
| 4345.93943255775              |                   |                   |   |
| TCGA-XF-A9SY-01A-21R-A42T-07  | 568.580293659178  | 2093.00884452631  |   |
| 2661.58913818549              |                   |                   |   |
| TCGA-CF-A9FF-01A-11R-A38B-07  | -625.082733799333 | 464.870711648536  | - |
| 160.212022150797              |                   |                   |   |
| TCGA-XF-A9ST-01A-11R-A42T-07  | -1452.33494512298 | -910.760543273716 | - |
| 2363.0954883967               |                   |                   |   |
| TCGA-DK-A6B5-01A-11R-A31N-07  | -931.125244359989 | 784.560181600577  | - |
| 146.565062759412              |                   |                   |   |
| TCGA-GC-A3RC-01A-11R-A22U-07  | -398.153421909789 | 1419.57250031378  |   |
| 1021.41907840399              |                   |                   |   |
| TCGA-GV-A3QK-01B-11R-A23N-07  | -1237.47014813954 | 907.964349640562  | - |
| 329.505798498975              |                   |                   |   |
| TCGA-GU-A764-01A-11R-A352-07  | 294.825535772183  | 1445.39113058881  |   |
| 1740.21666636099              |                   |                   |   |
| TCGA-GU-A42R-01A-11R-A23N-07  | -1597.99363018847 | -648.915837689319 | - |
| 2246.90946787779              |                   |                   |   |
| TCGA-DK-A6B6-01A-11R-A30C-07  | -1443.43262376977 | 788.351227643504  | - |
| 655.081396126269              |                   |                   |   |
| TCGA-R3-A69X-01A-22R-A30C-07  | 497.743965948862  | 1287.80872062057  |   |
| 1785.55268656944              |                   |                   |   |
| TCGA-5N-A9KM-01A-11R-A42T-07  | -65.2996265573967 | 881.091235166846  |   |
| 815.791608609449              |                   |                   |   |
| TCGA-FD-A6TF-01A-52R-A32O-07  | 461.656722401288  | 443.298894908113  |   |
| 904.955617309401              |                   |                   |   |
| TCGA-XF-AAAMR-01A-31R-A42T-07 | 575.856505686584  | 581.173489801797  |   |
| 1157.02999548838              |                   |                   |   |
| TCGA-XF-A8HF-01A-11R-A36F-07  | -174.945662703635 | 487.877590338229  |   |
| 312.931927634594              |                   |                   |   |
| TCGA-ZF-AA4U-01A-11R-A38B-07  | -2233.30650191097 | -270.486562086867 | - |
| 2503.79306399784              |                   |                   |   |
| TCGA-DK-A3IQ-01A-31R-A32Y-07  | 1736.9871898156   | 399.57919062322   |   |
| 2136.56638043882              |                   |                   |   |
| TCGA-E7-A4XJ-01A-11R-A26T-07  | -1361.02968958196 | -464.279747306729 | - |
| 1825.30943688869              |                   |                   |   |
| TCGA-XF-A9T6-01A-11R-A42T-07  | -1195.75635162973 | 310.790277204735  | - |
| 884.966074424999              |                   |                   |   |
| TCGA-4Z-AA7M-01A-11R-A39I-07  | -1044.07469020777 | -147.900415420209 | - |
| 1191.97510562798              |                   |                   |   |
| TCGA-ZF-AA56-01A-31R-A39I-07  | -169.837972957191 | 1033.42470508847  |   |
| 863.586732131281              |                   |                   |   |
| TCGA-XF-A8HH-01A-11R-A38B-07  | 229.908000882765  | 313.769589913473  |   |
| 543.677590796238              |                   |                   |   |
| TCGA-C4-A0EZ-01A-21R-A24X-07  | -1288.90661706792 | -1110.19414368343 | - |



2399.10076075136

TCGA-FD-A62P-01A-32R-A30C-07 161.154103258849 1162.68173969056  
1323.83584294941

TCGA-CF-A47V-01A-11R-A23W-07 -830.477753871231 397.55309455007 -  
432.924659321161

TCGA-XF-A9SI-01A-11R-A39I-07 727.199080083299 2808.41826800697  
3535.61734809026

TCGA-GU-A42Q-01A-11R-A23W-07 -1423.69837115476 -512.006765460406 -  
1935.70513661516

TCGA-BT-A42F-01A-11R-A23W-07 -202.524157314375 2064.31467805958  
1861.79052074521

TCGA-ZF-A9RF-01A-11R-A38B-07 -738.401296655835 1894.27495336705  
1155.87365671121

TCGA-KQ-A41N-01A-11R-A33J-07 -1236.93792798338 -731.981114305755 -  
1968.91904228914

TCGA-GD-A3OQ-01A-32R-A220-07 -1178.23996742716 -99.3533508635437 -  
1277.5933182907

TCGA-BT-A20U-01A-11R-A14Y-07 -334.644992683887 200.369184370325 -  
134.275808313562

TCGA-XF-A9SW-01A-11R-A42T-07 1486.6365612092 1153.95579223805  
2640.59235344725

TCGA-FD-A3B3-01A-12R-A206-07 730.911610889806 1978.75443131461  
2709.66604220442

TCGA-ZF-A9RC-01A-11R-A38B-07 4.13544028675025 -232.294228456223 -  
228.158788169473

TCGA-E7-A6MD-01A-41R-A352-07 66.1610586144643 1097.07833990619  
1163.23939852065

TCGA-E5-A4TZ-01A-11R-A31N-07 -1973.42384559385 -262.474176725722 -  
2235.89802231958

TCGA-ZF-A9R4-01A-11R-A38B-07 -1581.33267957473 186.128644960002 -  
1395.20403461473

TCGA-GV-A3QH-01A-11R-A220-07 -2213.64027408464 -725.978767242824 -  
2939.61904132746

TCGA-BT-A0YX-01A-11R-A10U-07 -517.228708371959 956.506000649337  
439.277292277379

TCGA-FT-A3EE-01A-11R-A206-07 -1058.68108746608 -231.710699642173 -  
1290.39178710825

TCGA-ZF-A9RL-01A-11R-A38B-07 -2185.41115589709 -893.943014636792 -  
3079.35417053388

TCGA-ZF-A9R9-01A-11R-A38B-07 754.640811127372 548.224852835442  
1302.86566396281

TCGA-ZF-A9RE-01A-11R-A38B-07 -1996.40247644546 -326.808620305714 -  
2323.21109675117

TCGA-DK-A6B1-01A-12R-A30C-07 -1211.78740896666 -389.904518587565 -

1601.69192755423  
 TCGA-CF-A5U8-01A-11R-A28M-07 -1750.59511208749 -455.534907505999 -  
 2206.13001959349  
 TCGA-XF-AAMW-01A-11R-A42T-07 -433.066221180463 814.910711458103  
 381.844490277641  
 TCGA-BT-A3PJ-01A-21R-A220-07 -627.122844600103 1041.80740196493  
 414.684557364831  
 TCGA-ZF-A9R7-01A-11R-A38B-07 -950.979577016314 2017.5198974305  
 1066.54032041418  
 TCGA-FD-A3SO-01A-11R-A22U-07 393.336387488797 1017.33852978541  
 1410.67491727421  
 TCGA-E7-A97P-01A-11R-A38B-07 127.32569362289 1733.07872608373  
 1860.40441970662  
 TCGA-GU-A767-01A-11R-A32O-07 -357.043029549337 -98.4177505040322 -  
 455.460780053369  
 TCGA-4Z-AA81-01A-11R-A39I-07 -1264.40528741215 811.527374162421 -  
 452.877913249733  
 TCGA-2F-A9KQ-01A-11R-A38B-07 -1210.75210430486 -567.434583695289 -  
 1778.18668800015  
 TCGA-SY-A9G0-01A-12R-A38B-07 1111.70720788801 705.648509389613  
 1817.35571727762  
 TCGA-GV-A40G-01A-11R-A23N-07 -1813.09368629993 -652.233408321241 -  
 2465.32709462117  
 TCGA-FD-A43Y-01A-21R-A26T-07 77.8547350270306 805.939846248049  
 883.79458127508  
 TCGA-S5-AA26-01A-11R-A38B-07 -1876.11556238347 -584.273507501117 -  
 2460.38906988459  
 TCGA-BT-A42E-01A-11R-A23W-07 -496.34046658957 1699.1688433453  
 1202.82837675573  
 TCGA-FD-A43X-01A-11R-A23W-07 -1790.5637959364 -499.391270154646 -  
 2289.95506609105  
 TCGA-ZF-AA4R-01A-11R-A38B-07 167.080833005086 -112.660018954096  
 54.4208140509901  
 TCGA-BT-A20T-01A-11R-A14Y-07 -43.5489793141607 782.71288247368  
 739.163903159519  
 TCGA-E7-A7DU-01A-11R-A32O-07 -1532.31573398478 -177.180169060665 -  
 1709.49590304545  
 TCGA-DK-A3WY-01A-11R-A22U-07 877.070572766707 3046.43663439239  
 3923.5072071591  
 TCGA-G2-A2EF-01A-12R-A18C-07 -664.77684773964 1658.84309640537  
 994.066248665731  
 TCGA-BT-A20V-01A-11R-A14Y-07 -1647.91122358842 475.648345572327 -  
 1172.26287801609  
 TCGA-K4-A3WV-01A-11R-A22U-07 -1350.80144022128 -827.785022119772 -

|                              |                   |                   |   |
|------------------------------|-------------------|-------------------|---|
| 2178.58646234105             |                   |                   |   |
| TCGA-GU-AATQ-01A-11R-A39I-07 | -1069.43577823296 | 159.550819738715  | - |
| 909.884958494244             |                   |                   |   |
| TCGA-G2-A3VY-01A-11R-A22U-07 | -2049.17595147835 | -988.817753449597 | - |
| 3037.99370492795             |                   |                   |   |
| TCGA-XF-AAN8-01A-11R-A42T-07 | 2133.42545753471  | 2204.50551055213  |   |
| 4337.93096808684             |                   |                   |   |
| TCGA-CU-A3QU-01A-11R-A22U-07 | -2026.62150968583 | -382.080452689975 | - |
| 2408.70196237581             |                   |                   |   |
| TCGA-GD-A3OP-01A-21R-A220-07 | 18.6098669609692  | 343.478466657246  |   |
| 362.088333618215             |                   |                   |   |
| TCGA-KQ-A41P-01A-12R-A33J-07 | -76.0761802569038 | 541.42076544462   |   |
| 465.344585187716             |                   |                   |   |
| TCGA-UY-A9PH-01A-11R-A38B-07 | 237.8776800423    | 2027.42427611512  |   |
| 2265.30195615742             |                   |                   |   |
| TCGA-FD-A5BY-01A-31R-A28M-07 | -180.540968255667 | 437.070438985763  |   |
| 256.529470730097             |                   |                   |   |
| TCGA-K4-A3WU-01B-11R-A23N-07 | 184.201182198523  | 1561.5199324101   |   |
| 1745.72111460862             |                   |                   |   |
| TCGA-FD-A3SJ-01A-12R-A22U-07 | -205.679743527125 | 12.9152543578159  | - |
| 192.764489169309             |                   |                   |   |
| TCGA-FD-A3B5-01A-11R-A20F-07 | -766.638014061358 | -247.387340107271 | - |
| 1014.02535416863             |                   |                   |   |
| TCGA-GC-A6I3-01A-11R-A31N-07 | -204.899418715885 | 1659.14233478994  |   |
| 1454.24291607405             |                   |                   |   |
| TCGA-4Z-AA80-01A-11R-A39I-07 | -1708.05124654491 | -462.830235248841 | - |
| 2170.88148179375             |                   |                   |   |
| TCGA-G2-A3IE-01A-11R-A20F-07 | -1340.96313298937 | -122.958523718651 | - |
| 1463.92165670802             |                   |                   |   |
| TCGA-ZF-A9R0-01A-11R-A38B-07 | -607.693984943553 | 394.330448394794  | - |
| 213.36353654876              |                   |                   |   |
| TCGA-FD-A43S-01A-21R-A23W-07 | 814.736949704908  | 2279.04329522962  |   |
| 3093.78024493453             |                   |                   |   |
| TCGA-XF-A8HG-01A-11R-A36F-07 | -1634.78198714386 | -475.927531332647 | - |
| 2110.70951847651             |                   |                   |   |
| TCGA-K4-A83P-01A-11R-A352-07 | 1137.63409297628  | 2526.22654573794  |   |
| 3663.86063871422             |                   |                   |   |
| TCGA-GD-A2C5-01A-12R-A180-07 | -187.87193619422  | 51.2987186878716  | - |
| 136.573217506348             |                   |                   |   |
| TCGA-XF-AAMX-01A-11R-A42T-07 | -375.471416658761 | -239.550048645797 | - |
| 615.021465304558             |                   |                   |   |
| TCGA-DK-A1AE-01A-11R-A13Y-07 | -1228.79321888643 | -360.855149512982 | - |
| 1589.64836839942             |                   |                   |   |
| TCGA-FJ-A3ZE-01A-11R-A23N-07 | -2032.58769776254 | -1008.63136943982 | - |

|                              |                   |                     |
|------------------------------|-------------------|---------------------|
| 3041.21906720236             |                   |                     |
| TCGA-DK-A2I1-01A-11R-A180-07 | 808.297604644903  | 1245.28264352501    |
| 2053.58024816991             |                   |                     |
| TCGA-DK-A6B0-01A-11R-A31N-07 | -1727.93319948494 | -211.279921538154 - |
| 1939.21312102309             |                   |                     |
| TCGA-FD-A5BR-01A-11R-A26T-07 | -136.148837856608 | 1052.95805430287    |
| 916.809216446266             |                   |                     |
| TCGA-KQ-A41Q-01A-11R-A33J-07 | -1406.93874253132 | -404.835818999476 - |
| 1811.77456153079             |                   |                     |
| TCGA-DK-A1AF-01A-11R-A13Y-07 | 1233.75697832623  | 1749.28436048849    |
| 2983.04133881472             |                   |                     |
| TCGA-LT-A5Z6-01A-11R-A28M-07 | -1795.20718002432 | 74.9059896058723 -  |
| 1720.30119041844             |                   |                     |
| TCGA-GC-A4ZW-01A-11R-A26T-07 | -1658.71878958017 | -542.020986439372 - |
| 2200.73977601954             |                   |                     |
| TCGA-K4-A4AB-01B-12R-A28M-07 | 162.191502421529  | 553.239262383828    |
| 715.430764805357             |                   |                     |
| TCGA-DK-AA74-01A-11R-A39I-07 | 1432.21182713722  | 2384.66188894924    |
| 3816.87371608646             |                   |                     |
| TCGA-G2-A2EO-01A-11R-A180-07 | 481.806384842526  | 1423.97030880791    |
| 1905.77669365044             |                   |                     |
| TCGA-DK-A1AG-01A-11R-A13Y-07 | -1748.76475523567 | 194.117419692186 -  |
| 1554.64733554348             |                   |                     |
| TCGA-GV-A3JZ-01A-11R-A21D-07 | -360.685738450838 | 124.840672904817 -  |
| 235.845065546021             |                   |                     |
| TCGA-XF-A9SV-01A-21R-A42T-07 | 174.011494206248  | -57.1817035516831   |
| 116.829790654565             |                   |                     |
| TCGA-UY-A78K-01A-11R-A33J-07 | -519.052299967316 | 1803.75858577481    |
| 1284.70628580749             |                   |                     |
| TCGA-FD-A6TH-01A-11R-A32O-07 | 32.6496987390192  | 157.024345303011    |
| 189.67404404203              |                   |                     |
| TCGA-DK-AA6W-01A-12R-A39I-07 | -1173.55681199002 | -63.586955616615 -  |
| 1237.14376760663             |                   |                     |
| TCGA-CF-A3MG-01A-11R-A20F-07 | -2140.71393130213 | -594.644819164725 - |
| 2735.35875046685             |                   |                     |
| TCGA-DK-A3X1-01A-12R-A22U-07 | -523.919944123092 | 119.594396716374 -  |
| 404.325547406718             |                   |                     |
| TCGA-DK-A1A6-01A-11R-A13Y-07 | -459.520824821251 | 976.249269605633    |
| 516.728444784382             |                   |                     |
| TCGA-XF-AAMG-01A-11R-A42T-07 | -177.348278351586 | -12.6414663308286 - |
| 189.989744682415             |                   |                     |
| TCGA-E7-A541-01A-11R-A26T-07 | -812.952266735791 | 1269.41313334994    |
| 456.460866614154             |                   |                     |
| TCGA-XF-A8HE-01A-11R-A36F-07 | -256.606839648727 | 1334.74874129075    |

|                              |                   |                   |   |
|------------------------------|-------------------|-------------------|---|
| 1078.14190164202             |                   |                   |   |
| TCGA-DK-AA6Q-01A-11R-A39I-07 | -1509.46478970951 | 1086.97023901499  | - |
| 422.49455069452              |                   |                   |   |
| TCGA-UY-A78N-01A-12R-A33J-07 | -1172.83468229566 | -869.392270788331 | - |
| 2042.22695308399             |                   |                   |   |
| TCGA-DK-AA75-01A-11R-A39I-07 | -1882.35491414549 | -727.72111841558  | - |
| 2610.07603256107             |                   |                   |   |
| TCGA-ZF-AA5P-01A-11R-A39I-07 | 732.775059977352  | 949.890897980438  |   |
| 1682.66595795779             |                   |                   |   |
| TCGA-GC-A3WC-01A-31R-A22U-07 | -167.17239431638  | 1757.86732560138  |   |
| 1590.694931285               |                   |                   |   |
| TCGA-K4-A4AC-01A-21R-A26T-07 | -523.945764548176 | 966.501407401279  |   |
| 442.555642853104             |                   |                   |   |
| TCGA-FD-A3SL-01A-21R-A22U-07 | 1129.88984900382  | 753.399900106675  |   |
| 1883.28974911049             |                   |                   |   |
| TCGA-K4-A5RH-01A-11R-A30C-07 | 891.464277888764  | 2493.92868210705  |   |
| 3385.39295999582             |                   |                   |   |
| TCGA-FD-A5C1-01A-11R-A28M-07 | 701.105619756801  | 1805.82659109374  |   |
| 2506.93221085054             |                   |                   |   |
| TCGA-BL-A13J-01A-11R-A277-07 | 344.380747623484  | -42.5649875159941 |   |
| 301.81576010749              |                   |                   |   |
| TCGA-XF-AAN7-01A-11R-A42T-07 | -154.731999344926 | 63.1241284988687  | - |
| 91.607870846057              |                   |                   |   |
| TCGA-2F-A9KO-01A-11R-A38B-07 | -114.753831166899 | 1490.74693725784  |   |
| 1375.99310609094             |                   |                   |   |
| TCGA-DK-A3IM-01A-11R-A20F-07 | -1737.41573368933 | -639.715983535885 | - |
| 2377.13171722522             |                   |                   |   |
| TCGA-FD-A3SS-01A-12R-A22U-07 | -958.72325079688  | -406.527065853809 | - |
| 1365.25031665069             |                   |                   |   |
| TCGA-4Z-AA7N-01A-11R-A39I-07 | 826.302726508366  | 2591.45437520603  |   |
| 3417.75710171439             |                   |                   |   |
| TCGA-HQ-A2OE-01A-11R-A206-07 | -1745.33654133416 | -390.552031005961 | - |
| 2135.88857234012             |                   |                   |   |
| TCGA-UY-A8OC-01A-11R-A36F-07 | 350.970042512313  | 328.515162659298  |   |
| 679.485205171611             |                   |                   |   |
| TCGA-GV-A3JV-01A-11R-A220-07 | -177.653164313987 | 632.429044599162  |   |
| 454.775880285175             |                   |                   |   |
| TCGA-XF-A9T8-01A-11R-A39I-07 | 369.017844327711  | 1995.76792593932  |   |
| 2364.78577026703             |                   |                   |   |
| TCGA-KQ-A41S-01A-12R-A33J-07 | 353.971710952567  | 303.416326172519  |   |
| 657.388037125085             |                   |                   |   |
| TCGA-CU-A3YL-01A-11R-A22U-07 | -961.922583244866 | -109.762621998064 | - |
| 1071.68520524293             |                   |                   |   |
| TCGA-E7-A7XN-01A-11R-A352-07 | -895.821398563133 | 1911.59250164216  |   |

|                              |                   |                     |
|------------------------------|-------------------|---------------------|
| 1015.77110307902             |                   |                     |
| TCGA-DK-A2HX-01A-12R-A18C-07 | 974.057304470224  | 293.222654677199    |
| 1267.27995914742             |                   |                     |
| TCGA-CF-A8HY-01A-11R-A36F-07 | -1612.82895106668 | -88.5171415211215 - |
| 1701.3460925878              |                   |                     |
| TCGA-4Z-AA7W-01A-11R-A39I-07 | -58.4117668942496 | 2475.46711419258    |
| 2417.05534729833             |                   |                     |
| TCGA-FD-A43U-01A-11R-A23W-07 | 1033.45329488401  | 2301.74441945265    |
| 3335.19771433666             |                   |                     |
| TCGA-BL-A0C8-01A-11R-A277-07 | -449.592246309703 | -122.304480982962 - |
| 571.896727292665             |                   |                     |
| TCGA-BT-A0S7-01A-11R-A10U-07 | -464.777068420294 | -67.8764696476256 - |
| 532.653538067919             |                   |                     |
| TCGA-ZF-A9R3-01A-11R-A38B-07 | -1182.91022840462 | 253.290712694302 -  |
| 929.619515710321             |                   |                     |
| TCGA-4Z-AA89-01A-11R-A39I-07 | -2158.294363701   | -57.7930899753459 - |
| 2216.08745367635             |                   |                     |
| TCGA-GU-A42P-01A-11R-A23W-07 | -1909.34791982124 | -959.417681808155 - |
| 2868.7656016294              |                   |                     |
| TCGA-FD-A3NA-01A-11R-A21D-07 | -321.773283396217 | 698.017697206538    |
| 376.244413810321             |                   |                     |
| TCGA-XF-A9SL-01A-11R-A39I-07 | 1105.16162020127  | 2044.32635681624    |
| 3149.48797701752             |                   |                     |
| TCGA-XF-AAN2-01A-11R-A42T-07 | -901.798831236067 | 948.311875314414    |
| 46.5130440783471             |                   |                     |
| TCGA-ZF-AA54-01A-11R-A39I-07 | 873.727549304878  | 1762.36268053392    |
| 2636.0902298388              |                   |                     |
| TCGA-GU-A766-01A-11R-A32O-07 | 242.011714770769  | 2421.33416777284    |
| 2663.34588254361             |                   |                     |
| TCGA-FD-A6TD-01A-51R-A33J-07 | 286.947985167223  | 1631.53527030588    |
| 1918.4832554731              |                   |                     |
| TCGA-FD-A3B4-01A-12R-A206-07 | 147.647213485489  | 1364.43974608364    |
| 1512.08695956913             |                   |                     |
| TCGA-DK-A1AB-01A-11R-A13Y-07 | 904.627106195868  | 979.728693227383    |
| 1884.35579942325             |                   |                     |
| TCGA-BT-A20X-01A-11R-A16R-07 | -223.947970053036 | 459.802028745757    |
| 235.854058692721             |                   |                     |
| TCGA-GV-A3JW-01A-11R-A20F-07 | -1546.02268516892 | -981.624590791572 - |
| 2527.64727596049             |                   |                     |
| TCGA-UY-A9PB-01A-11R-A38B-07 | 763.072803490882  | 1939.60988445854    |
| 2702.68268794942             |                   |                     |
| TCGA-FD-A6TI-01A-11R-A32O-07 | -693.920231777971 | -21.6333481950401 - |
| 715.553579973011             |                   |                     |
| TCGA-XF-AAML-01A-11R-A42T-07 | -1949.33197322945 | 245.007207086883 -  |

|                              |                   |                   |
|------------------------------|-------------------|-------------------|
| 1704.32476614256             |                   |                   |
| TCGA-ZF-AA58-01A-12R-A42T-07 | 832.421028511303  | 2408.90926962996  |
| 3241.33029814126             |                   |                   |
| TCGA-FD-A3SP-01A-31R-A22U-07 | 1689.58127151147  | 1927.84872828072  |
| 3617.42999979219             |                   |                   |
| TCGA-E7-A97Q-01A-11R-A38B-07 | -152.857801951363 | 308.461824408523  |
| 155.60402245716              |                   |                   |
| TCGA-YC-A9TC-01A-22R-A39I-07 | -931.067500488275 | -161.159956289126 |
| 1092.2274567774              |                   | -                 |
| TCGA-GV-A3QG-01A-11R-A220-07 | 1357.86136405346  | 2695.53252943873  |
| 4053.39389349219             |                   |                   |
| TCGA-K4-A6FZ-01A-11R-A31N-07 | -909.570806340159 | 921.416710885304  |
| 11.845904545145              |                   |                   |
| TCGA-KQ-A41R-01A-21R-A352-07 | -1303.46774622012 | -347.870294916384 |
| 1651.33804113651             |                   | -                 |
| TCGA-DK-AA6M-01A-11R-A39I-07 | -11.3999136635055 | 1639.37948641968  |
| 1627.97957275618             |                   |                   |
| TCGA-ZF-AA52-01A-12R-A39I-07 | 846.292363366363  | 1078.71789570361  |
| 1925.01025906998             |                   |                   |
| TCGA-K4-A5RJ-01A-11R-A28M-07 | 478.80077242076   | 2801.215369322    |
| 3280.01614174276             |                   |                   |
| TCGA-HQ-A5ND-01A-11R-A26T-07 | -1677.70079274035 | -151.747050054836 |
| 1829.44784279519             |                   | -                 |
| TCGA-BT-A3PK-01A-21R-A220-07 | 306.16329258565   | 1002.16901400892  |
| 1308.33230659457             |                   |                   |
| TCGA-FD-A3N6-01A-11R-A21D-07 | -1046.85996799916 | 323.828665629366  |
| 723.031302369793             |                   | -                 |
| TCGA-UY-A78P-01A-12R-A36F-07 | 201.816430034873  | 1991.65980853899  |
| 2193.47623857386             |                   |                   |
| TCGA-CF-A9FL-01A-11R-A38B-07 | -352.97179372608  | 24.1416699230391  |
| 328.830123803041             |                   | -                 |
| TCGA-CF-A9FM-01A-11R-A38B-07 | -1518.77480299465 | 227.322721063996  |
| 1291.45208193066             |                   | -                 |
| TCGA-ZF-A9RD-01A-11R-A42T-07 | -193.121943129963 | 1848.44094266946  |
| 1655.31899953949             |                   |                   |
| TCGA-G2-AA3D-01A-11R-A39I-07 | -2081.87527012191 | -342.514907955678 |
| 2424.39017807759             |                   | -                 |
| TCGA-DK-A2I2-01A-11R-A180-07 | 248.762378948983  | 1599.57107133301  |
| 1848.33345028199             |                   |                   |
| TCGA-FD-A62S-01A-11R-A30C-07 | 1228.01053955981  | 1430.42634501072  |
| 2658.43688457054             |                   |                   |
| TCGA-MV-A51V-01A-11R-A26T-07 | -1224.20316892502 | -552.797718192875 |
| 1777.0008871179              |                   | -                 |
| TCGA-E5-A2PC-01A-11R-A206-07 | -1523.62718741926 | 452.595072385873  |
|                              |                   | -                 |

|                              |                   |                     |
|------------------------------|-------------------|---------------------|
| 1071.03211503339             |                   |                     |
| TCGA-DK-A3X2-01A-11R-A22U-07 | -1794.67618515797 | -937.914934425342 - |
| 2732.59111958331             |                   |                     |
| TCGA-GD-A76B-01A-11R-A32O-07 | -718.44362776124  | 1396.59807991946    |
| 678.154452158218             |                   |                     |
| TCGA-GC-A6I1-01A-12R-A31N-07 | -166.131682816432 | 2365.04898254227    |
| 2198.91729972584             |                   |                     |
| TCGA-BL-A13J-01B-04R-A277-07 | -202.208910011313 | 96.3841148638609 -  |
| 105.824795147453             |                   |                     |
| TCGA-XF-A9SK-01A-11R-A42T-07 | 745.382465182645  | 1242.28337236767    |
| 1987.66583755031             |                   |                     |
| TCGA-DK-A1AD-01A-11R-A13Y-07 | -331.0121845321   | 310.168349833909 -  |
| 20.8438346981912             |                   |                     |
| TCGA-K4-A5RI-01A-11R-A28M-07 | -566.691747384443 | 228.556556143882 -  |
| 338.135191240561             |                   |                     |
| TCGA-FD-A3SQ-01A-21R-A22U-07 | 803.541658254063  | 891.756762782574    |
| 1695.29842103664             |                   |                     |
| TCGA-GV-A3QF-01A-31R-A22U-07 | -1693.48975167865 | -428.639944514986 - |
| 2122.12969619363             |                   |                     |
| TCGA-E7-A7DV-01A-11R-A33J-07 | 595.294169019933  | 2109.71002106544    |
| 2705.00419008537             |                   |                     |
| TCGA-XF-AAN1-01A-31R-A42T-07 | -1453.78713063721 | -126.442477107213 - |
| 1580.22960774442             |                   |                     |
| TCGA-DK-AA6P-01A-11R-A39I-07 | -1605.05876552268 | -782.593791136675 - |
| 2387.65255665935             |                   |                     |
| TCGA-CF-A47Y-01A-11R-A23W-07 | -1624.68248148741 | -376.218007364147 - |
| 2000.90048885155             |                   |                     |
| TCGA-CF-A3MI-01A-11R-A20F-07 | -1024.21735865767 | 347.571424696541 -  |
| 676.645933961132             |                   |                     |
| TCGA-G2-A2EL-01A-12R-A18C-07 | -2040.28584853238 | -1568.14746083726 - |
| 3608.43330936964             |                   |                     |
| TCGA-XF-AAMZ-01A-11R-A42T-07 | -973.872086697145 | 314.327715836028 -  |
| 659.544370861117             |                   |                     |
| TCGA-DK-AA6L-01A-11R-A39I-07 | -923.02319102306  | 831.704845498504 -  |
| 91.3183455245564             |                   |                     |
| TCGA-XF-A9T4-01A-11R-A39I-07 | -718.018002739846 | 635.46679586265 -   |
| 82.5512068771961             |                   |                     |
| TCGA-K4-A6MB-01A-11R-A31N-07 | -433.891083441411 | -192.608514448187 - |
| 626.499597889598             |                   |                     |
| TCGA-UY-A8OB-01A-12R-A42T-07 | -1272.65995314996 | 580.526628831692 -  |
| 692.133324318265             |                   |                     |
| TCGA-ZF-A9R5-01A-12R-A42T-07 | -1723.28754754897 | -75.5974073801236 - |
| 1798.88495492909             |                   |                     |
| TCGA-CU-A3KJ-01A-11R-A21D-07 | -1045.76657443499 | 436.616766778907 -  |



|                              |                   |                   |
|------------------------------|-------------------|-------------------|
| 609.14980765608              |                   |                   |
| TCGA-DK-AA6S-01A-21R-A39I-07 | 778.818925387025  | 1141.69148126021  |
| 1920.51040664724             |                   |                   |
| TCGA-E7-A85H-01A-11R-A352-07 | -534.715271573857 | 608.701823472203  |
| 73.986551898346              |                   |                   |
| TCGA-G2-AA3C-01A-21R-A39I-07 | -17.8576771025931 | 2029.08106918844  |
| 2011.22339208585             |                   |                   |
| TCGA-E7-A8O8-01A-11R-A36F-07 | -1417.88701186195 | -204.305748354888 |
| 1622.19276021684             |                   | -                 |
| TCGA-XF-A9SM-01A-11R-A42T-07 | 666.28377128677   | 2459.52995822561  |
| 3125.81372951238             |                   |                   |
| TCGA-DK-A3IN-01A-11R-A20F-07 | 481.799794022937  | 1027.67921867083  |
| 1509.47901269377             |                   |                   |
| TCGA-XF-A8HC-01A-11R-A36F-07 | -2017.84906652496 | -932.863744983032 |
| 2950.71281150799             |                   | -                 |
| TCGA-ZF-AA4W-01A-12R-A38B-07 | -1278.47459226969 | 6.70580173231864  |
| 1271.76879053737             |                   | -                 |
| TCGA-LC-A66R-01A-41R-A30C-07 | -267.877519335175 | 1537.19868726588  |
| 1269.32116793071             |                   |                   |
| TCGA-E7-A8O7-01A-11R-A36F-07 | -1312.76049886002 | 651.163964501938  |
| 661.59653435808              |                   | -                 |
| TCGA-LT-A8JT-01A-11R-A36F-07 | -1481.12956791891 | 173.191911923928  |
| 1307.93765599498             |                   | -                 |
| TCGA-FJ-A3Z9-01A-11R-A26T-07 | -1931.44448339208 | -721.075810155327 |
| 2652.52029354741             |                   | -                 |
| TCGA-DK-A1AC-01A-11R-A13Y-07 | 8.80091179662419  | 953.785396065404  |
| 962.586307862028             |                   |                   |
| TCGA-C4-A0F1-01A-11R-A034-07 | -368.222923983684 | 321.679364037092  |
| 46.5435599465918             |                   | -                 |
| TCGA-G2-A2ES-01A-11R-A180-07 | -27.312057183619  | 862.008122716481  |
| 834.696065532862             |                   |                   |
| TCGA-XF-AAN4-01A-11R-A42T-07 | 1629.95268748855  | 2066.68853911871  |
| 3696.64122660726             |                   |                   |
| TCGA-4Z-AA83-01A-11R-A39I-07 | -833.78110129157  | 469.588299768067  |
| 364.192801523502             |                   | -                 |
| TCGA-E7-A5KE-01A-11R-A28M-07 | -2171.9519261966  | -953.389035873166 |
| 3125.34096206977             |                   | -                 |
| TCGA-ZF-AA4V-01A-11R-A38B-07 | -449.691856880621 | 859.659773780432  |
| 409.967916899811             |                   |                   |
| TCGA-ZF-AA53-01A-11R-A39I-07 | 656.076765225657  | 1689.96893904514  |
| 2346.04570427079             |                   |                   |
| TCGA-ZF-A9RM-01A-11R-A38B-07 | -2485.34263522628 | -853.289509848077 |
| 3338.63214507436             |                   | -                 |
| TCGA-BL-A13I-01A-11R-A13Y-07 | 745.797096263816  | 2226.70862514418  |

|                              |                   |                   |
|------------------------------|-------------------|-------------------|
| 2972.50572140799             |                   |                   |
| TCGA-CU-A72E-01A-12R-A33J-07 | -148.207798363489 | 294.732762849119  |
| 146.52496448563              |                   |                   |
| TCGA-2F-A9KR-01A-11R-A38B-07 | -1435.12042202624 | -210.880182178551 |
| 1646.00060420479             |                   | -                 |
| TCGA-E5-A4U1-01A-11R-A31N-07 | -2037.85348988987 | -936.04058380524  |
| 2973.89407369511             |                   | -                 |
| TCGA-E7-A3Y1-01A-11R-A22U-07 | -1269.25135970556 | -107.626011827154 |
| 1376.87737153271             |                   | -                 |
| TCGA-FD-A6TC-01A-21R-A33J-07 | 296.619442099809  | 140.138506476349  |
| 436.757948576158             |                   |                   |
| TCGA-FD-A5BV-01A-11R-A26T-07 | -1058.56180205714 | -452.073388791714 |
| 1510.63519084886             |                   | -                 |
| TCGA-DK-A2I4-01A-11R-A21D-07 | 1199.40745230096  | 2758.49038399081  |
| 3957.89783629177             |                   |                   |
| TCGA-UY-A78M-01A-21R-A352-07 | -300.033173084078 | -233.22784561422  |
| 533.261018698298             |                   | -                 |
| TCGA-4Z-AA7R-01A-11R-A39I-07 | -948.698466618074 | -654.90810916688  |
| 1603.60657578495             |                   | -                 |
| TCGA-E7-A519-01A-11R-A26T-07 | -781.430640349037 | 1313.26313642851  |
| 531.83249607947              |                   |                   |
| TCGA-DK-A3IU-01A-11R-A20F-07 | 917.344709126541  | 2730.25526296488  |
| 3647.59997209142             |                   |                   |
| TCGA-FD-A3SM-01A-11R-A22U-07 | 154.036706669144  | -40.5038960108056 |
| 113.532810658339             |                   |                   |
| TCGA-BL-A5ZZ-01A-31R-A30C-07 | 935.830069132174  | 1253.64892432889  |
| 2189.47899346107             |                   |                   |
| TCGA-FD-A62N-01A-11R-A30C-07 | 1360.71434562603  | 3006.37526757426  |
| 4367.0896132003              |                   |                   |
| TCGA-BT-A20J-01A-11R-A14Y-07 | -325.973402452671 | 1766.75835208646  |
| 1440.78494963379             |                   |                   |
| TCGA-DK-AA71-01A-31R-A39I-07 | -1247.75247983422 | -220.522373868609 |
| 1468.27485370283             |                   | -                 |
| TCGA-KQ-A41O-01A-12R-A352-07 | -2502.81683610988 | -1426.77319398445 |
| 3929.59003009433             |                   | -                 |
| TCGA-BL-A13I-01A-11R-A277-07 | 777.129374010517  | 2073.58085361043  |
| 2850.71022762095             |                   |                   |
| TCGA-E7-A677-01A-11R-A30C-07 | -1077.47670300041 | 167.589549739366  |
| 909.887153261041             |                   | -                 |
| TCGA-DK-A1A5-01A-11R-A13Y-07 | 334.520173901917  | 384.891273091952  |
| 719.411446993869             |                   |                   |
| TCGA-HQ-A5NE-01A-12R-A28M-07 | -436.961017941409 | 354.578787699562  |
| 82.3822302418473             |                   | -                 |
| TCGA-XF-AAMT-01A-11R-A42T-07 | 849.711835524479  | 1037.36319251755  |

|                              |                   |                   |   |
|------------------------------|-------------------|-------------------|---|
| 1887.07502804203             |                   |                   |   |
| TCGA-XF-A9SU-01A-31R-A39I-07 | 455.149957590174  | 961.231276715512  |   |
| 1416.38123430569             |                   |                   |   |
| TCGA-CF-A47S-01A-11R-A23W-07 | -1481.40518224087 | 267.163316288429  | - |
| 1214.24186595244             |                   |                   |   |
| TCGA-FD-A6TK-01A-42R-A33J-07 | 904.790348518546  | 1598.65569786854  |   |
| 2503.44604638708             |                   |                   |   |
| TCGA-E7-A5KF-01A-11R-A28M-07 | -2385.07344194345 | -526.199074894634 | - |
| 2911.27251683808             |                   |                   |   |
| TCGA-UY-A78L-01A-12R-A33J-07 | -233.36122727095  | 226.736692537261  | - |
| 6.62453473368876             |                   |                   |   |
| TCGA-S5-A6DX-01A-11R-A31N-07 | 362.704896270794  | 1887.87861577723  |   |
| 2250.58351204802             |                   |                   |   |
| TCGA-XF-A8HI-01A-11R-A38B-07 | -1526.667462905   | 28.5389557869321  | - |
| 1498.12850711807             |                   |                   |   |
| TCGA-XF-A9T5-01A-11R-A42T-07 | 109.353541738119  | 2144.473106133    |   |
| 2253.82664787111             |                   |                   |   |
| TCGA-XF-A9SX-01A-21R-A39I-07 | 977.305618013402  | 1911.62828751059  |   |
| 2888.93390552399             |                   |                   |   |
| TCGA-G2-A2EK-01A-22R-A18C-07 | -896.109348200544 | 344.419676264481  | - |
| 551.689671936063             |                   |                   |   |
| TCGA-XF-A8HD-01A-11R-A36F-07 | -255.093238502541 | 1428.60975449535  |   |
| 1173.5165159928              |                   |                   |   |
| TCGA-GV-A3JX-01A-11R-A20F-07 | -1270.51880290438 | 627.91602032096   | - |
| 642.602782583424             |                   |                   |   |
| TCGA-H4-A2HQ-01A-11R-A180-07 | -1727.80728318017 | -333.128808351955 | - |
| 2060.93609153213             |                   |                   |   |
| TCGA-XF-A9SP-01A-11R-A39I-07 | 941.019599083924  | 849.81682449322   |   |
| 1790.83642357714             |                   |                   |   |
| TCGA-DK-A3IK-01A-32R-A21D-07 | -394.154105026893 | -11.2664414147934 | - |
| 405.420546441686             |                   |                   |   |
