# Supplementary material for: Ferroptosis‐Related Long Noncoding RNAs Have Excellent Predictive Ability for Multiomic Characteristics of Bladder Cancer
Source: Hindawi journal article supplement (doi:10.1155/2022/9316847), 2022-01-01
Supplement: f1 [file 9316847.f1.zip]

| Mixture                       | B cells naive      | B cells memory      | Plasma cells        | T cells CD8         | T cells CD4 naive | T cells CD4 memory resting | T cells CD4 memory activated | T cells follicular helper | T cells regulatory (Tregs) | T cells gamma delta | NK cells resting | NK cells activated  | Monocytes           | Macrophages M0     | Macrophages M1      | Macrophages M2     | Dendritic cells resting | Dendritic cells activated | Mast cells resting | Mast cells activated | Eosinophils        | Neutrophils          | P-value | Correlation        | RMSE             |
|-------------------------------|--------------------|---------------------|---------------------|---------------------|-------------------|----------------------------|------------------------------|---------------------------|----------------------------|---------------------|------------------|---------------------|---------------------|--------------------|---------------------|--------------------|-------------------------|---------------------------|--------------------|----------------------|--------------------|----------------------|---------|--------------------|------------------|
| TCGA-GD-A3OP-11A-11R-A220-070 | 0.0161710399295584 | 0                   | 0.00537396706861971 | 0.151435975414936   | 0                 | 0.207791864906784          | 0.0424037706147541           | 0.00256726265543052       | 0                          | 0.0152455255508599  | 0                | 0                   | 0.0305622820785503  | 0                  | 0.209513195286685   | 0.10163686256871   | 0.112317950177314       | 0.0369129801438529        | 0.0680673236039456 | 0                    | 0                  | 0                    | 0.098   | 0.110584177400225  | 1.06015381218083 |
| TCGA-BT-A20Q-11A-11R-A14Y-07  | 0                  | 0.00112359416624234 | 0                   | 0.0511764430618364  | 0                 | 0.274533720322075          | 0                            | 0.00185270052966052       | 0.0549333089157158         | 0                   | 0                | 0.0324523892311536  | 0.079222545285068   | 0                  | 0.00451774244108637 | 0.1653353686305    | 0.0579338916289317      | 0                         | 0.27691829578773   | 0                    | 0                  | 0                    | 0.108   | 0.106039306055898  | 1.04413904997505 |
| TCGA-GD-A2C5-11A-11R-A180-07  | 0.117569924637317  | 0.0125344904904807  | 0.0689341839673839  | 0.100618630232976   | 0                 | 0.347405573147848          | 0.00276143549746051          | 0.0201920725234019        | 0.0670463187129218         | 0                   | 0                | 0.0391472481987654  | 0.0126078312200423  | 0.0122206594141602 | 0.00432506605287033 | 0.0298138595525777 | 0.0898200810268384      | 0.0243524597917993        | 0.0453733640624686 | 0                    | 0                  | 0.00527680147068799  | 0.056   | 0.152644217285323  | 1.03864281518733 |
| TCGA-BT-A20N-11A-11R-A14Y-07  | 0.222882605247587  | 0                   | 0                   | 0.00709156436349284 | 0                 | 0.128843119558491          | 0                            | 0.0277021387144975        | 0                          | 0.00203963273732235 | 0                | 0                   | 0.0828399138992844  | 0                  | 0.0245373648377983  | 0.219179806004026  | 0.0386967940867684      | 0.00696484308331167       | 0.169196119590046  | 0                    | 0                  | 0.0700260978773745   | 0.051   | 0.159304616609996  | 1.01694459412326 |
| TCGA-BT-A2LB-11A-11R-A18C-07  | 0.182529746323259  | 0                   | 0.0104706469225918  | 0.187927783364529   | 0                 | 0.155549589504467          | 0.0701518773962926           | 0.0295975798744461        | 0.00681613364356333        | 0                   | 0                | 0.00627374664297745 | 0.00786955040823954 | 0                  | 0.031566127518989   | 0.155524428940592  | 0                       | 0.0674163746574254        | 0.0187019727445265 | 0.0318649922597459   | 0.0144811587689853 | 0.0232582910293696   | 0.054   | 0.15583819354421   | 1.02266860962948 |
| TCGA-GC-A3BM-11A-11R-A22U-07  | 0.0260266404412066 | 0                   | 0.00340034802322837 | 0.329903569520475   | 0                 | 0.0162066863269801         | 0                            | 0.0183142986727882        | 0.0346714713904119         | 0                   | 0                | 0.018112964401798   | 0.0209149408175491  | 0                  | 0.00326747644452134 | 0.0674699132632192 | 0.0125619559119332      | 0.00157136265456602       | 0                  | 0.419427427454565    | 0.0278241396939299 | 0.000326804982828444 | 0.3     | 0.0428430832818963 | 1.14669568560233 |

TCGA-CU-A0YR-11A-13R-A10U-07 0.233085807882693 0 0.0720123306514228  
0.15533325040894 0 0.119563457664068 0 0.0795079097478596  
0.0168458811136265 0 0 0.0846715490151731 7.35843931576815e-05  
0.0114363645848368 0.0304247454843112 0.0784760796240044 0 0  
0.115790129841156 0.00277890958875149 0 0 0.001 0.407668427475824  
0.915658141230852

TCGA-GC-A3WC-11A-11R-A22U-07 0.259845379786475 0 0.044827316927685  
0.0465744532729527 0 0.369992706971842 0.0436672802720383  
0.0339083403534718 0 0 0.00624122330389125 0 0.00567058007875526  
0.0121707557928318 0.0176975144032251 0.06688009513927  
0.00707081821962057 0.0177164435317254 0.0677370919462158 0 0 0  
0.004 0.33874837403063 0.951986938341134

TCGA-CU-A0YN-11A-11R-A10U-07 0.157202336883721 0 0 0.0392990419009631  
0 0.200773613841764 0 0.00913295266485445 0.00272884581720867 0 0  
0.00779230549699647 0.0283189373188256 0 0.0116051370624927  
0.342976787531223 0 0 0.200170041481951 0 0 0 0.077  
0.132237534309087 1.028858090735

TCGA-BT-A20R-11A-11R-A16R-07 0.0351696331480143 0 0.00556411880943247  
0.0200446407384881 0 0.111473752231 0.0146862901913712 0 0 0 0  
0.0151085288728137 0.0205027541640384 0 0.0385313686711263  
0.180961814599367 0.055599718912872 0 0.4553785358892  
0.0303949626994959 0 0.0165838810727809 0.009000000000000001  
0.268117958526293 0.993349036448483

TCGA-BT-A20U-11A-11R-A14Y-07 0.124050245301558 0.0395870167316055  
0.0324769724774433 0.257594497208784 0 0.0567976244038228  
0.077407492272353 0.0444157852097337 0.00960408130911379  
0.0193908141763004 0 0.0282050148353142 0 0.00707119045589169  
0.0248141903743139 0.0979228312358288 0.087224452934047  
0.0100523022086796 0.0668253285044646 0 0.0165601603607462 0  
0.009000000000000001 0.264444278280809 0.976840402829615

TCGA-BT-A20W-11A-11R-A14Y-07 0.0433196104966659 0 0 0.26075611398042  
0 0.182799872677161 0.0427669806551867 0.0606542653045228  
0.0400938633124288 0.0111119461173972 0 0.0460224296014332  
0.0206858909886105 0 0.0543994065748336 0.0840994261021153  
0.0452047008466712 0.0110993671063094 0.0969861262362435 0 0 0  
0.009000000000000001 0.26712663069298 0.985307839210536

TCGA-GD-A3OQ-11A-21R-A220-07 0.0594024880430081 0  
0.00361167596186517 0.261375665361622 0 0.21293698292291 0  
0.00283651730134346 0.0180815962787415 0 0 0 0.0154742489355055 0  
0.0143288603143166 0.148688291942217 0.117213538191496 0  
0.0710132769537658 0.0471034986042476 0.0239025647612085  
0.00403079442775225 0.269 0.0486019879066777 1.06861715135711

TCGA-K4-A5RI-11A-11R-A28M-07 0.166170846226971 0 0.107343894548853  
0.117820389948988 0 0.127163886823652 0.0689532822466676 0

0.0672160889661851 0 0 0.015283048142667 0.007099743181023  
 0.0480967842723029 0.0224682949284274 0.101887005969196 0  
 0.0327768789946541 0.100056776507774 0 0 0.0176630792426397 0.001  
 0.4211344284011 0.906224409561297  
 TCGA-BL-A13J-11A-13R-A10U-07 0.0264076156717557 0 0 0.0148899120984716  
 0 0.252856635488767 0 0.0112336716171822 0 0 0  
 0.0508313820014833 0.054781667431391 0 0 0.29692530456142 0  
 0.000724053905414176 0.208614110642845 0 0.0344370683532519  
 0.0482985782280178 0.077 0.130964508175198 1.02859714021494  
 TCGA-K4-A54R-11A-11R-A26T-07 0 0 0.00358268062696957 0.29075972282624  
 0 0.1822564478526 0.117607656141537 0 0 0 0.0658374806156768 0  
 0.0112075073119485 0 0.0066091367504714 0.0631033289741803  
 0.0292436104300093 0.0694154189099168 0.0366438284349518  
 0.101317184185118 0.0184912132834851 0.00392478365689514 0.246  
 0.0551353934835833 1.08481638022406  
 TCGA-K4-A3WV-11A-21R-A22U-07 0.0464081630535691 0 0.0260952981275007  
 0.368220077158517 0 0.141897925915944 0 0.0441046619244792 0  
 0.0572235179595928 0 0 0 0.0240064901224109 0.169354545406431  
 0.0254707841992688 0.050513260065774 0.00997544866999592  
 0.0367298273965165 0 0 0.148 0.086174686446791 1.07592750935238  
 TCGA-GC-A6I3-11A-11R-A31N-07 0.105197240810493 0.0629588989219491  
 0.140598387679153 0.147429197313266 0 0.0580430530825952  
 0.0903892857423274 0.111996945502676 0.0444263121694792 0  
 0.0387322016866541 0 0.0041331070565139 0.0466044591955552  
 0.00214710654281249 0.0549415847600468 0 0.0623934556088334  
 0.0146892954882258 0.0038880561085688 0 0.0114314123308517 0.001  
 0.405362507859555 0.91609667626772  
 TCGA-BT-A2LA-11A-11R-A18C-07 0 0 0 0.300452260512681 0  
 0.241412965601117 0.0337056408862016 0.010504868941463 0  
 0.0587763192929615 0 0 0.00703441945217866 0 0.00989975831106781  
 0.140625133864275 0.0431752093440213 0.0244755835063617 0  
 0.119259185576332 0.0106786547113393 0 0.148 0.0863575081622781  
 1.07815711432939  
 TCGA-CF-A47X-01A-31R-A23W-07 0.00138970372746311 0.0797047034168756  
 0.0398054967235299 0.124598107029748 0 0.032378562025286 0  
 0.0780716731463025 0.0797041974198762 0 0 0 0.117639774333916  
 0 0.132044381905473 0.0870867879185809 0.211209435220117 0  
 0.0163671771328323 0 0 0.532 0.0102333400225524 1.08198402822789  
 TCGA-ZF-AA51-01A-21R-A39I-07 0.0053972920251132 0 0.03303382665734  
 0.147214182048647 0 0.0949677831162563 0.0638505743299221  
 0.0712041766734538 0.118290227454479 0 0 0.00863863777723926 0  
 0.206916021919355 0.105831420234611 0.120912772055827  
 0.00451768187937414 0.00766325368391598 0.00676234603279873 0 0  
 0.00479980411166659 0.202 0.0667750236451522 1.0709346745211

TCGA-BL-A0C8-01A-11R-A10U-07 0.0116416433330551 0 0 0.0371500753925435  
0 0.154565656828757 0 0 0.0106743439454047 0 0.0438318182437906  
0 0.075478948631912 0.0338686220358198 0 0.406175389743727 0  
0.164779014931874 0.0558443207145858 0 0 0.0059901661985294 0.655  
-0.00359784870562845 1.09034623494709

TCGA-BT-A42C-01A-11R-A23N-07 0.183133871403364 0 0.0261364187051448  
0.122022230487201 0 0.045767018611142 0 0.0590527425852587  
0.0900585557625549 0 0.0318826564196788 0 0.00106787355548618 0  
0.022818717835961 0 0.0549491266507819 0.198509142530627 0  
0.126731827941387 0.0207170652532402 0.0171527522581718 0.093  
0.114099390214757 1.0481105958476

TCGA-G2-A3IB-01A-11R-A20F-07 0 0.00628661448522449 0.00206906710811909  
0.109947654651065 0 0.211917713091393 0.0287188565104067 0 0 0  
0.0158979396197178 0.0422147421317694 0 0.326006618263731  
0.0288293276503043 0.0979961614437186 0.0273282822866204  
0.0861102597547225 0.0159649834487121 0 0.000711779554495908 0  
0.191 0.0705486277036442 1.07717467223314

TCGA-2F-A9KP-01A-11R-A38B-07 0.177333426428699 0.0768975316380486  
0.00598571147924275 0.0677457019872861 0 0.0649972631975928  
0.058204491389895 0.0147806696963626 0.0123455841789722 0  
0.0608253203959842 0 0.0305283319057437 0 0 0.115568454792881 0  
0.233429806230622 0.0134702538372178 0.0187924603020678 0  
0.0490949925393842 0.507 0.0136014491329872 1.08286922736964

TCGA-DK-A3IT-01A-31R-A20F-07 0.243520986842863 0 0.203530076328052  
0.0629865447847656 0 0.127227237490724 0.0077659012785053 0 0 0  
0.0131282173340819 0 0.0223162091096812 0.0420553227868293  
0.0391917238974463 0.121150757649198 0 0.0276578146943057  
0.0894692078035469 0 0 0 0.001 0.502691042818589  
0.86419165833498

TCGA-FD-A43P-01A-31R-A23W-07 0.0609219179601933 0 0.0338228646884176  
0.270967353848787 0 0 0.161329759219094 0.0453432468207776  
0.0603541880770927 0.0312842457830405 0 0.0233543743743531 0  
0.113822491102937 0.131478580477297 0.0479657372459824  
0.00160380057143241 0.000517597199791512 0.017233842630803 0 0 0  
0.017 0.225541355940883 1.00362630483067

TCGA-DK-A3IV-01A-22R-A21D-07 0.0876909725124662 0.0179586448209897 0  
0.0523138699563902 0 0.26589846104355 0 0.0750835515383951  
0.103387914665202 0.00585663611371529 0 0.04723860236588 0  
0.0631918234933871 0.119855490983476 0.0517159640849493  
0.0173893899797973 0.0618719330406195 0.0305467454011829 0 0 0  
0.00600000000000001 0.307502860429485 0.966196019004904

TCGA-2F-A9KW-01A-11R-A38B-07 0.108790850881825 0 0.0127797071454817  
0.0110983544276664 0 0.033843311021465 0.0088404747454937 0  
0.0407278515139437 0 0.00568965691744846 0 0 0.33132356909697

0.0273027916088977 0.177736347731173 0 0.121853654793615  
 0.00994302073963182 0 0.0515149700285031 0.0585554393478851 0.069  
 0.13918146993471 1.05128363439994  
 TCGA-GU-A762-01A-11R-A33J-07 0.0304872899414805 0 0.00832054783338106  
 0.253559664376634 0 0.0245594819537569 0.185590750540385  
 0.0274221644139415 0.0312151488793496 0 0.0886852352666279 0  
 0.0112878111054619 0.0199904636392502 0.107031216916187  
 0.152718991471752 0.0114127528953466 0.0144318049915809  
 0.0332866757748642 0 0 0 0.012 0.243362575181321  
 0.990927506278605  
 TCGA-XF-AAME-01A-12R-A42T-07 0.130500566708846 0 0.0654557636139875  
 0.0603872938160191 0 0.170318157935557 0.0384516952975555 0  
 0.0424365909545036 0.0328648614587157 0 0.00317171037762998 0  
 0.11055863956844 0.0196065045884966 0.174383569541002  
 0.0263537222036117 0.0178492104329475 0.0824615168566191 0  
 0.0058792998695273 0.0193208967765406 0.005 0.320043483203073  
 0.949450887019236  
 TCGA-XF-AAN0-01A-11R-A42T-07 0.128633395296673 0 0.130073239916684  
 0.13143507236881 0 0.135303945367606 0.031694013992183  
 0.063865907092987 0.00125538138233193 0 0 0.0187816233386472  
 0.00562501061301293 0.0216526352183584 0.102540552874722  
 0.142794437939584 0.00213148414308559 0 0.044266260675064 0 0  
 0.0399470397802496 0.002 0.381665678160227 0.925771491353068  
 TCGA-CF-A47W-01A-11R-A23W-07 0 0.0450338920438011 0.0321584009570568  
 0.160531832741624 0 0.126369062072679 0 0 0 0  
 0.0348357236680683 0.0821781694463277 0.0445170081496632 0  
 0.0106858352974641 0.266006400098519 0.0188529881319048  
 0.108394446554959 0.0704362408379335 0 0 0 0.756 -  
 0.0131111859165917 1.08542514098362  
 TCGA-GC-A3I6-01A-11R-A20F-07 0 0 0.00477375862907049 0.037628354656605  
 0 0.145118876843663 0.0455145757433405 0.0596945318924321 0 0  
 0.0347727821080551 0.051911559690233 0 0.101935861256437  
 0.15055849194538 0.132720853316173 0 0.114369878978787  
 0.121000474939824 0 0 0 0.003 0.346163306359681  
 0.944193878368476  
 TCGA-FD-A6TA-01A-12R-A33J-07 0.173056931360728 0 0.174109504482321  
 0.0825325286777698 0 0.146184301054919 0.00168361312766473  
 0.0311560544138222 0.017138828502029 0 0 0.0222973329688529  
 0.0129999744185416 0.109386453806299 0.09073832950098  
 0.103712298268284 0.00172140013779095 0 0.0322873544740775 0 0  
 0.000995094805920327 0.001 0.423322735531076 0.907605945758877  
 TCGA-DK-A1A7-01A-11R-A13Y-07 0.243656484999258 0 0.101258085556724  
 0.124254333457885 0 0.139019958970379 0.00733076724307894  
 0.0700996847478418 0.0579680077844109 0 0 0.0440536445051596 0

0.03394947614825 0.0110442863046474 0.049540786443165  
 0.0146879050920566 0.0339181446876239 0.0692184340595195 0 0 0  
 0.002 0.366496803695222 0.938502671642693  
 TCGA-FD-A3SR-01A-11R-A22U-07 0.0134701097760006 0 0.00155493473436257  
 0.148671649039694 0 0.227734517531001 0 0.0265236320988672  
 0.0762153199971839 0 0 0.015118031460941 0.00691443398466327  
 0.0726084739641248 0.181083184194999 0.114577372130209  
 0.0142224451593336 0.00252149920192385 0.0987843967266959 0 0 0  
 0.045 0.167582453351507 1.03399160332496  
 TCGA-GU-AATP-01A-11R-A39I-07 0.0969813605238136 0 0.0156833004326444  
 0.0815720783110424 0 0.0978263774235833 0.0250529360901695  
 0.0479453897186216 0.0312297452040049 0 0.00535511083978896 0 0  
 0.257288046526212 0.0359143833632505 0.177544396237622 0  
 0.0875521733069777 0.0395963395361403 0 0 0.00045836248612844 0.043  
 0.170400920385561 1.01921825064235  
 TCGA-DK-AA6X-01A-12R-A42T-07 0.0392953228036602 0.0399476230722913 0  
 0.0793743140714271 0 0.129075652310704 0.0105468432111726  
 0.0125798656691551 0.0574490525012339 0 0 0.0141879107353793  
 0.0142452087098291 0.101737829097426 0.063110911013402  
 0.0872335549344836 0.192292639235504 0.00363771170985223  
 0.146312195202087 0 0 0.00897336572239275 0.168 0.0795187036273998  
 1.03968756433039  
 TCGA-XF-A9T3-01A-11R-A42T-07 0.198949996821258 0 0.0222305079087967  
 0.0580555926915162 0 0.116601829870854 0.0430296619989984  
 0.0285873524125109 0.0106172588458553 0 0.00572327338061762  
 0.0169348153852475 0 0.231878118935767 0.0893421679745023  
 0.129904399206571 0 0 0.0481450245675048 0 0 0 0.001  
 0.404850692723611 0.914105330179824  
 TCGA-PQ-A6FN-01A-11R-A31N-07 0.12146115575533 0 0.152223934256415  
 0.160373940073024 0 0 0.0522929355923437 0.0224791014633237  
 0.0174452051852569 0 0.00181094742205492 0.000369342800624573 0  
 0.270690143530386 0.0883202691249627 0.0721476835950608  
 0.0341582677697214 0 0.00535709785740451 0 0 0.000869975574091666  
 0.001 0.405537953163875 0.916298563333604  
 TCGA-DK-A3WW-01A-22R-A23N-07 0.0100731264746326 0  
 0.00562513732294626 0.300709063757813 0 0 0.206970195285306  
 0.0481914712021261 0.00978560374508177 0 0.080887023913695 0 0  
 0.0196289304718316 0.143278265421311 0.112208231297159  
 0.0307602471073564 0.0101112684613247 0.0149743837864374 0 0  
 0.00679705175297993 0.003 0.361206106284279 0.93998409879981  
 TCGA-XF-AAMY-01A-11R-A42T-07 0 0.0238962645593531 0.0152724251846546  
 0.0519899195285269 0 0.00359473758655223 0.0259181222732299  
 0.00527381159966325 0.0151875739996221 0 0.0252251946318173 0  
 0.0440513693702314 0.329223228848764 0.0338774229205239

|                              |                     |                     |                     |                    |                  |   |       |
|------------------------------|---------------------|---------------------|---------------------|--------------------|------------------|---|-------|
| 0.168541131897382            | 0                   | 0.0373442131268981  | 0.0584545315640155  | 0                  |                  |   |       |
| 0.151222680978152            | 0.0109273719306137  | 0.088               | 0.122308616435112   |                    |                  |   |       |
| 1.05254950268281             |                     |                     |                     |                    |                  |   |       |
| TCGA-K4-A3WS-01A-11R-A22U-07 | 0.205051841084455   | 0                   | 0.0669123812509965  |                    |                  |   |       |
| 0.115643064290729            | 0                   | 0.0123227629109693  | 0.0498462055879264  |                    |                  |   |       |
| 0.0140006606736832           | 0.0803254530609563  | 0                   | 0.00922462048565805 |                    |                  |   |       |
| 0.00749785937389328          | 0.00893428491792908 | 0.0407698913730648  |                     |                    |                  |   |       |
| 0.180204755081702            | 0.108723703641659   | 0.0347127012576242  |                     |                    |                  |   |       |
| 0.0154161526766696           | 0.0504136623320838  | 0                   | 0                   | 0                  | 0.001            |   |       |
| 0.458642253849657            | 0.888043936512029   |                     |                     |                    |                  |   |       |
| TCGA-UY-A9PA-01A-11R-A38B-07 | 0                   | 0                   | 0.00114834099518966 | 0.280989531325739  |                  |   |       |
| 0                            | 0.127212288136977   | 0.186655943526155   | 0.0652391146113237  | 0                  | 0                |   |       |
| 0.0167739554248755           | 0.00728373851567843 | 0                   | 0.0375621082778196  |                    |                  |   |       |
| 0.0838569050571417           | 0.0568951664296842  | 0.0512295012485657  |                     |                    |                  |   |       |
| 0.0430357829232697           | 0.0421176235275804  | 0                   | 0                   | 0                  | 0.212            |   |       |
| 0.0641455439850891           | 1.07770766762199    |                     |                     |                    |                  |   |       |
| TCGA-G2-AA3F-01A-12R-A42T-07 | 0                   | 0.0368676955452207  | 0.0124958769990686  |                    |                  |   |       |
| 0.0732571190382511           | 0                   | 0.0393307488107054  | 0.0296441379981884  |                    |                  |   |       |
| 0.0141591207452423           | 0.0525819022971267  | 0                   | 0.109330508169912   | 0                  | 0                |   |       |
| 0.229220034257088            | 0.112782486912438   | 0.230595649086081   |                     |                    |                  |   |       |
| 0.0149092621187741           | 0.00166541968328517 | 0.0431600383386186  | 0                   | 0                  | 0                |   |       |
| 0.433                        | 0.0232882043768149  | 1.0863177627745     |                     |                    |                  |   |       |
| TCGA-FJ-A871-01A-11R-A352-07 | 0.0433125035969954  | 0                   | 0.0166378193116718  |                    |                  |   |       |
| 0.13793350791707             | 0.0315301940324615  | 0.0689965285997988  |                     |                    |                  |   |       |
| 0.15918788688964             | 0                   | 0                   | 0.0611366962831632  | 0                  | 0                |   |       |
| 0.277468539276536            | 0.019324700793209   | 0.133119921069288   | 0                   | 0                  |                  |   |       |
| 0.051351702230167            | 0                   | 0                   | 0.029               | 0.188540634663855  |                  |   |       |
| 1.01070521492029             |                     |                     |                     |                    |                  |   |       |
| TCGA-ZF-A9RN-01A-11R-A42T-07 | 0.00166345301225786 | 0                   | 0                   | 0.377432278550714  |                  |   |       |
| 0                            | 0.124267705838101   | 0.138352009629974   | 0.0537422872400869  |                    |                  |   |       |
| 0.0236252845790008           | 0                   | 0.00501620554478301 | 0.0151972420589414  |                    |                  |   |       |
| 0.00961275200784374          | 0.0518070750025915  | 0.104374957616989   |                     |                    |                  |   |       |
| 0.0595881664428489           | 0                   | 0                   | 0.0353205824758679  | 0                  | 0                | 0 | 0.029 |
| 0.19003000289545             | 1.03700445431686    |                     |                     |                    |                  |   |       |
| TCGA-GC-A3RB-01A-12R-A220-07 | 0                   | 0.0298309586976022  | 0.0124921849898195  |                    |                  |   |       |
| 0.146421078246531            | 0                   | 0.118179306131185   | 0.00280456533793635 |                    |                  |   |       |
| 0.0479813919011304           | 0.0155928365682782  | 0                   | 0                   | 0.0451420838903312 |                  |   |       |
| 0.00957854960034666          | 0.070128065881309   | 0.0688279591250027  |                     |                    |                  |   |       |
| 0.177608803867394            | 0.190610604212982   | 0.0480331896578804  | 0                   |                    |                  |   |       |
| 0.0167684218922713           | 0                   | 0                   | 0.131               | 0.0941903489044093 | 1.04580003125988 |   |       |
| TCGA-UY-A9PF-01A-11R-A38B-07 | 0.149518950446085   | 0                   | 0                   | 0.0759287521677998 |                  |   |       |
| 0                            | 0.143671775063409   | 0                   | 0.0870987128666718  | 0.0224719972654087 | 0                | 0 |       |
| 0.0637075011655699           | 0                   | 0.043167134032307   | 0.0796244663280451  |                    |                  |   |       |
| 0.0804745300076261           | 0.0416023832842691  | 0.087617096333181   |                     |                    |                  |   |       |

0.125116701039628 0 0 0 0.0659999999999999 0.141701645604687  
 1.02613316814404  
 TCGA-YC-A89H-01A-11R-A36F-07 0.135994458092926 0 0.104098936129744  
 0.0826064617579451 0 0 0.0603835804884046 0.0124089132661363  
 0.00365183393116442 0 0.00568252592596527 0.0280339812328621 0  
 0.312316624914136 0.0638727932670749 0.165274054672649  
 0.0201446771167514 0 0 0.00333754512496159 0.00076273646149721  
 0.00143087761778202 0.002 0.371830063167697 0.934199412868502  
 TCGA-XF-AAMQ-01A-11R-A42T-07 0.1077725300374 0 0.11734198217391  
 0.209359990175502 0 0.104726155755685 0.078824019301748  
 0.0728283962726226 0.00672154305272124 0 0 0.0102340973299325 0 0  
 0.0680919007593749 0.07647893357015 0.0623669617856937  
 0.0481263236860346 0.0349619820193921 0 0.00216518407983295 0 0.003  
 0.365042709489951 0.933739038774483  
 TCGA-CF-A1HR-01A-11R-A13Y-07 0.18451690788203 0 0.113147517658059  
 0.201104330955395 0 0.108735054102346 0.000837874386855903  
 0.000522199216917256 0.0063354222982768 0 0 0.0500400729478171  
 0.0188346220240006 0.00631917156356521 0.0329427120933275  
 0.0956883786315735 0.00512690144026155 0.0818876100066676  
 0.0931216307863319 0 0 0.000839594006574329 0.003  
 0.358199869043706 0.938272290282405  
 TCGA-E7-A3X6-01A-12R-A22U-07 0 0 0.0138373700984168 0.186477971376287  
 0 0 0.106092107376719 0.0919625099520689 0.032553382346659  
 0.0348224005007441 0 0.0334905489759074 0 0.0450492270110634  
 0.151253675678108 0.0926694985832654 0.0958682494830136  
 0.0287367579489709 0.081078480744647 0 0 0.00610781992412853  
 0.008000000000000001 0.278085447659009 0.973276088351462  
 TCGA-DK-A6AW-01A-11R-A30C-07 0 0.0328729400673636 0.0187901601122496  
 0.145829139961308 0 0.168051280718547 0 0.0449558692984589  
 0.105656248986128 0 0 0.127037695683556 0.0235489923046821  
 0.0632450815895281 0 0.116037318284854 0 0.101545070022141  
 0.0508065427953633 0 0 0.00162366017581956 0.414 0.0258496639886369  
 1.09198337759785  
 TCGA-GC-A3BM-01A-11R-A22U-07 0.00614319999572321 0.0311580053069122 0  
 0.161328098567715 0 0.171962078608246 0.0157890957971537  
 0.173314566277772 0 0 0 0.0126099059173669 0.0124537283644208 0  
 0.210570680379448 0.0624810368474187 0.118202446743458  
 0.00702073233088711 0.0169664248634786 0 0 0 0.138  
 0.0928484004616576 1.08122105627811  
 TCGA-GV-A6ZA-01A-12R-A33J-07 0.0621701877832359 0 0.0445589351617393  
 0.175677547302729 0 0.116632353346289 0.0106653701804778  
 0.134933415077724 0.0414939988546639 0 0.0907338460648134  
 0.00944528328197921 0.0109840843422896 0.0691225416860968  
 0.0803864002579543 0.0361272038490675 0.0436293214338728



0.0263554264006952 0.0470840849763725 0 0 0 0.034  
0.183307192693106 1.0194840053243  
TCGA-G2-A2EJ-01A-11R-A180-07 0 0.0131786543121497 0 0 0  
0.11147987803132 0.0350471836650633 0.0134223378978362  
0.00624682839362809 0.014669748740802 0 0.0294969440046966 0  
0.183926942766109 0.0969232669871921 0.0630412735227461 0  
0.225356629806191 0 0.19147908345929 0.0115726566724944  
0.00415857174048162 0.008000000000000001 0.27945916910368  
0.991406436698123  
TCGA-FD-A43N-01A-11R-A23W-07 0.272053698561545 0 0.122613103964411  
0.0833711392330829 0 0.0616135779777936 0 0 0.00468467293443956 0  
0 0 0 0.167517522083644 0.0519854981568687 0.0998877741165685 0  
0.0482472047410849 0 0.0784394886674372 0.00904642161874873  
0.000539897944376435 0.001 0.454487074275394 0.891420702360249  
TCGA-UY-A8OD-01A-11R-A36F-07 0.0892971862356406 0 0 0.109394951899862  
0 0.118106498432263 0.00310347387986181 0.038494766095259  
0.0389252462707759 0.0180359904761067 0 0.0446441199452343 0  
0.335731303506116 0.065476581087374 0.0590734576336307 0 0  
0.0797164245378758 0 0 0 0.03 0.187365321133551 1.01794531717358  
TCGA-2F-A9KT-01A-11R-A38B-07 0 0.00229342506290232 0.0107505337276358  
0.0769493292946229 0 0.155066485419491 0 0.0643634219534842 0 0  
0.0107962685743406 0.0306896290342949 0 0.190179122294205  
0.0696916725698648 0.222768585912985 0.00185982353845567 0  
0.0106796736336676 0 0.0198743279193887 0.134037701064662 0.272  
0.0481126448248799 1.07924154638933  
TCGA-BT-A20Q-01A-11R-A14Y-07 0.0415355689355311 0 0.146829329044847  
0.126349925170309 0 0.108657403159758 0.0648997092861466  
0.0651794119865891 0.0426858178470813 0 0 0.0192708349814967  
0.0124096509679609 0.00235585375428545 0.0915692096740419  
0.100117132409657 0.117530069903514 0.0151755794089325  
0.0454345034698482 0 0 0 0.005 0.319523919720256  
0.952190184618955  
TCGA-CU-A0YR-01A-12R-A10U-07 0.0511592954308121 0 0.0188987564625971  
0.0968696601349672 0 0.0637661906161476 0.0176888295588179  
0.0245347990932656 0.0106177911373516 0 0 0.0506609287993893 0  
0.340671325213313 0.063432153754242 0.180634707587005  
0.029871866174909 0.0436111781074433 0 0.00138508126970137 0  
0.00619743666003779 0.026 0.197409482333865 1.02116329312458  
TCGA-SY-A9G5-01A-11R-A38B-07 0.0335882768632162 0 0.0366094562118352  
0.160394836032529 0 0.0819265189836537 0.0208894056579993  
0.14295756912219 0 0.0552191300044169 0 0.0285473299365037 0  
0.0444002086751204 0 0.170520018166007 3.40673398303895e-05  
0.175966961138189 0.0489462218685101 0 0 0 0.005  
0.318389746198725 0.953670521696448

TCGA-4Z-AA84-01A-11R-A39I-07 0.144123428754011 0 0.141059788850891  
0.059515754386499 0 0.0866654209809726 0 0.0628000568650171  
0.0122685217232801 0 0 0.0164838707478213 0 0.319593665009613  
0.0407925995234716 0.0859305578362278 0 0.0166805790067085 0  
0.0130313449191707 0 0.00105441139631565 0.006000000000000001  
0.306432085441291 0.969590977683466

TCGA-4Z-AA7Q-01A-11R-A39I-07 0.0135445056171615 0 0.00350076278534536  
0.281984735342048 0 0.108404500431796 0.112040463156609  
0.045027729002279 0.0411121825817431 0 0 0.00515541120413514  
0.00800983913154007 0.0490498838895282 0.160661979745543  
0.0923660248107237 0 0.0339641426910897 0.0451778396104581 0 0 0  
0.092 0.116910843104188 1.06158362889789

TCGA-FD-A5BT-01A-11R-A26T-07 0.0422906003736378 0 0.0096005858881896  
0.227414927301096 0 0.0381451577237718 0.092141163628757  
0.086243503877066 0.0241943571386264 0 0 0.0241772060081945  
0.0153390646782913 0.0571681863674134 0.105869081185474  
0.239666297790728 0.0105857568516374 0 0.0271641111871168 0 0 0  
0.002 0.370279464753864 0.930032185072182

TCGA-CF-A27C-01A-11R-A16R-07 0 0 0.0368525557442483 0.292498361490768  
0 0.159570254523678 0 0.0469047242975024 0.100980629007985 0 0  
0.0670367053797429 0.0196008954000181 0 0 0.025417793885231  
0.0989909988021423 0.111117306989839 0.0323791380592228 0 0  
0.0086506364196221 0.682 -0.00613292622952986 1.12270684725801

TCGA-E7-A6MF-01A-12R-A32O-07 0.00913791332612782 0.0278800822727926 0  
0.139415724239787 0 0.257768689698112 0 0.0835784395960124  
0.0294023973828928 0 0 0.029043051664292 0.0956472839136986 0  
0.024681413261091 0.15628033515544 0.0676941328732223  
0.0395178060933245 0.0276155116066041 0 0 0.0123372189166022 0.2  
0.0671742387499026 1.06269477284589

TCGA-FT-A61P-01A-11R-A30C-07 0.0307100853003706 0 0.013845878900749  
0.0716884311969858 0 0.109274226234258 0.119701747482732  
0.0683439213964616 0 0 0.015138998621118 0.0191022722141759  
0.0092940702886026 0.144847910005006 0.0878538336217863  
0.185202920578176 0.0493708823175642 0.00765815899050609  
0.0679666628515069 0 0 0 0.014 0.236754475104165  
0.983553075544359

TCGA-DK-AA77-01A-11R-A39I-07 0.00951339990079729 0 0.00808825254001723  
0.264075377743358 0 0.107680969379688 0.119616997305593  
0.0902090301578543 0 0 0.000646568033976061 0  
0.00722944445911641 0 0.0755594435996054 0.0858526354922623  
0.0515448054762459 0.13889101736536 0.0369310476128855 0 0  
0.00416101093324143 0.05 0.161905059590252 1.03088040969506

TCGA-ZF-AA5N-01A-11R-A42T-07 0.177720221907872 0 0.0443890393406911  
0.00263997628099646 0 0.0320023055994034 0.146382252793828

|                              |                     |                      |                     |                     |                    |
|------------------------------|---------------------|----------------------|---------------------|---------------------|--------------------|
| 0.00763880351873747          | 0.0329865879196922  | 0                    | 0                   | 0.05298452218421    | 0                  |
| 0.13450832955766             | 0.0351604938159572  | 0.0983552070684111   | 0                   |                     |                    |
| 0.195969957542116            | 0.00779914180002545 | 0.0120673593586037   | 0                   |                     |                    |
| 0.019395801311796            | 0.039               | 0.177163662536372    | 1.01614721955254    |                     |                    |
| TCGA-DK-AA6U-01A-11R-A39I-07 | 0.149159922841938   | 0                    | 0.0246106500183742  |                     |                    |
| 0.196175340631367            | 0                   | 0.0105727621259092   | 0                   | 0.112364460835911   | 0                  |
| 0                            | 0.0218095746002094  | 0.0677524349776161   | 0                   | 0.06241260143946    |                    |
| 0.134907054716616            | 0.0705248730713322  | 0.0820443987473368   |                     |                     |                    |
| 0.0238627208231244           | 0                   | 0                    | 0.0438032051708049  | 0.267               | 0.0497304118699965 |
| 1.06078549946048             |                     |                      |                     |                     |                    |
| TCGA-BT-A20O-01A-21R-A14Y-07 | 0.0294366480035695  | 0                    | 0.00592196665255138 |                     |                    |
| 0.339257923087528            | 0                   | 0.120769621586501    | 0.108618046865276   |                     |                    |
| 0.0420472893884823           | 0                   | 0                    | 0.0131481414069627  | 0.00894591683704305 | 0                  |
| 0.0804101876289454           | 0.157715198289585   | 0.0108449265899136   | 0                   |                     |                    |
| 0.0764039163921771           | 0                   | 0                    | 0.00648021727146494 | 0.088               | 0.122239445913869  |
| 1.04908262440589             |                     |                      |                     |                     |                    |
| TCGA-GD-A3OS-01A-12R-A22O-07 | 0.0604900142165343  | 0                    | 0                   | 0.0618288427527674  |                    |
| 0                            | 0.183655973413756   | 0.000214550147035357 | 0.0496675668060003  |                     |                    |
| 0.0510239264790949           | 0                   | 0.0086645579961823   | 0                   | 0                   | 0.359454454274919  |
| 0.011026162756719            | 0.199279938044368   | 0                    | 0.0146940131126231  | 0                   | 0                  |
| 0                            | 0.069               | 0.139004207604632    | 1.05403908339785    |                     |                    |
| TCGA-XF-A9SZ-01A-11R-A39I-07 | 0                   | 0.0203853318413098   | 0                   | 0.0261867529941745  |                    |
| 0                            | 0.0511444000183604  | 0.00635820227491373  | 0.00597463926081103 |                     |                    |
| 0.00964212751624727          | 0                   | 0.0723408114400103   | 0                   | 0                   | 0.488104538844369  |
| 0.0118200286365673           | 0.165010313550313   | 0                    | 0                   | 0                   | 0.103863712343436  |
| 0.039169141279488            | 0.122               | 0.0985748189718502   | 1.10805821833239    |                     |                    |
| TCGA-4Z-AA82-01A-11R-A39I-07 | 0                   | 0.0501544540207217   | 0.00527034361905301 | 0                   |                    |
| 0                            | 0.179015280464736   | 0                    | 0.065118059949842   | 0.00200700922739444 | 0                  |
| 0.0732767065482584           | 0.0101448843400152  | 0.030568233451697    | 0                   |                     |                    |
| 0.0361551280943274           | 0.245066902114761   | 0.219562606805835    |                     |                     |                    |
| 0.0767241781585408           | 0                   | 0                    | 0.00693621320481921 | 0.014               | 0.236703088972684  |
| 0.987987475390132            |                     |                      |                     |                     |                    |
| TCGA-DK-AA76-01A-11R-A39I-07 | 0                   | 0.080185176973679    | 0                   | 0.0779843095187232  |                    |
| 0                            | 0.210159346179281   | 0                    | 0                   | 0.111624224477626   | 0                  |
| 0.00257678528400193          | 0.0231228316118143  | 0.182050584279645    | 0                   |                     |                    |
| 0.145915773288521            | 0                   | 0.079640884248777    | 0                   | 0.0867400841379313  | 0                  |
| 0.488                        | 0.0171761376656654  | 1.08203950090241     |                     |                     |                    |
| TCGA-DK-A3IL-01A-11R-A20F-07 | 0.405135380038017   | 0.0064697049638907   |                     |                     |                    |
| 0.0233983314684501           | 0.0619732276684585  | 0                    | 0.0517006616999406  | 0                   |                    |
| 0.0889379498527562           | 0.00631137539994779 | 0                    | 0                   | 0.0258672649398822  | 0                  |
| 0.149036741200886            | 0.0531581593505245  | 0.0361460746915981   | 0                   |                     |                    |
| 0.043962936208848            | 0.0479021925168     | 0                    | 0                   | 0                   | 0.189              |
| 1.09473677122163             |                     |                      |                     | 0.0713505267864752  |                    |
| TCGA-E7-A678-01A-11R-A30C-07 | 0                   | 0                    | 0.182351722529855   | 0.138722657810515   |                    |

|                              |                     |                     |                     |                    |                    |
|------------------------------|---------------------|---------------------|---------------------|--------------------|--------------------|
| 0                            | 0.359201173118697   | 0                   | 0.00938467261473742 | 0.050636642437211  |                    |
| 0.0151886544957579           | 0                   | 0.068865189394611   | 0                   | 0.0332672069697264 |                    |
| 0.0174412259400122           | 0.0329883396076033  | 0                   | 0.0425852912419932  |                    |                    |
| 0.0493672238392806           | 0                   | 0                   | 0.014               | 0.238383618691549  |                    |
| 1.01161586014888             |                     |                     |                     |                    |                    |
| TCGA-ZF-A9R1-01A-11R-A39I-07 | 0.237781046333257   | 0.00127960519361933 |                     |                    |                    |
| 0.0263091734634373           | 0.196788352950018   | 0                   | 0.0825448155361695  | 0                  |                    |
| 0.0340030953782759           | 0.0435739057441624  | 0                   | 0                   | 0.0531575266521375 |                    |
| 0.00952406154924274          | 0.0886971315836295  | 0.0255462141723269  |                     |                    |                    |
| 0.0666554306392917           | 0.0343814801587565  | 0.0306264301377756  |                     |                    |                    |
| 0.0691317305078998           | 0                   | 0                   | 0.077               | 0.132105365125351  |                    |
| 1.03969423019399             |                     |                     |                     |                    |                    |
| TCGA-XF-A9SH-01A-11R-A39I-07 | 0.0011818812617028  | 0.0502689607902392  |                     |                    |                    |
| 0.0480277702192685           | 0.0446948438225239  | 0                   | 0.188067737843504   | 0                  |                    |
| 0.00221112253849258          | 0.0538680907296188  | 0                   | 0                   | 0.0373823561542528 | 0                  |
| 0.129790341923305            | 0.0096487198178598  | 0.219733603002314   |                     |                    |                    |
| 0.112984390753654            | 0.0309308082830531  | 0.057731469086308   | 0                   |                    |                    |
| 0.008530142542497            | 0.00494776123140684 | 0.045               | 0.16685246809814    |                    |                    |
| 1.01173022931196             |                     |                     |                     |                    |                    |
| TCGA-FD-A5BU-01A-31R-A26T-07 | 0.119414215190647   | 0                   | 0.119693453600567   |                    |                    |
| 0.014623201040583            | 0                   | 0.157481353705465   | 0.0248982767938614  |                    |                    |
| 0.040081939358403            | 0.0145364159035374  | 0                   | 0.0167979199052611  |                    |                    |
| 0.0234284146740174           | 0.00780831444297888 | 0.132485237728658   |                     |                    |                    |
| 0.100780511755048            | 0.0482302437135031  | 0.112530961801111   | 0                   |                    |                    |
| 0.0650829428131901           | 0                   | 0                   | 0.00212659757316829 | 0.003              | 0.36123533465105   |
| 0.933241921097294            |                     |                     |                     |                    |                    |
| TCGA-C4-A0F7-01A-11R-A084-07 | 0                   | 0.00885529584290128 | 0                   | 0.155305670632912  |                    |
| 0                            | 0.225523407488574   | 0                   | 0                   | 0                  | 0.0207708044709052 |
| 0.0650161067429791           | 0.153033376944491   | 0.0578150977751654  |                     |                    |                    |
| 0.0708013361347883           | 0.0492855290621911  | 0.108007460695006   |                     |                    |                    |
| 0.0449081477331412           | 0.00628882980265077 | 0                   | 0.0343889366742951  | 0.479              |                    |
| 0.0179059165236307           | 1.08006295296729    |                     |                     |                    |                    |
| TCGA-C4-A0F0-01A-12R-A10U-07 | 0.00683940410878107 | 0                   | 0.00351894243397081 |                    |                    |
| 0.1582585517499              | 0                   | 0.186373258107263   | 0.0659697370354189  | 0                  | 0                  |
| 0.00460493632369749          | 0                   | 0                   | 0.102244325932784   | 0.101092260271183  |                    |
| 0.172197208788847            | 0.113903279009207   | 0.00883632153460983 |                     |                    |                    |
| 0.0491165375009207           | 0.00657430678979116 | 0                   | 0.0204709304136264  | 0.01               |                    |
| 0.252583409494098            | 0.980244952346411   |                     |                     |                    |                    |
| TCGA-FD-A3N5-01A-11R-A21D-07 | 0.00865475519389695 | 0                   | 0.00900861911044108 |                    |                    |
| 0.110482690096845            | 0                   | 0.0939387219074469  | 0.100640976913316   |                    |                    |
| 0.038508101373415            | 0                   | 0                   | 0.00261667358419169 | 0.0634998669152737 | 0                  |
| 0.360056752124427            | 0.0368660352708413  | 0.090797994153168   |                     |                    |                    |
| 0.0538857350488566           | 0.00654138029287407 | 0                   | 0.0109383055496169  | 0                  |                    |
| 0.0135633924653894           | 0.019               | 0.219371807205625   | 1.00957426458858    |                    |                    |

TCGA-ZF-AA5H-01A-11R-A39I-07 0.0456012235579887 0 0.000519195541425012  
0.101871275734849 0 0.158479736399072 0.075151020468482  
0.0112375415275983 0 0 0.048355711455929 0.0286618349391716 0  
0.264625616177689 0.117414265004351 0.143526716360308  
0.00256948574936809 0.00198637708376935 0 0 0 0.05  
0.161807550402984 1.03196452972035

TCGA-DK-A3WX-01A-22R-A22U-07 0.0293389989917264 0 0.0148808264565563  
0.0810733890472177 0 0.219975758327534 0.031152713373456  
0.0435835196922254 0 0 0.0417126734863358 0.0135998067566625 0  
0.125787958273537 0.116158482297398 0.0466061912180927  
0.00740076201144866 0 0 0.0778462408459275 0 0.150882679221881  
0.033 0.183782238708487 1.01909237429933

TCGA-YF-AA3L-01A-11R-A38B-07 0 0.0972511001034129 0.000973107742470952  
0.0185723472748683 0 0.175512817584756 0 0.0206563479803397  
0.0816161954586574 0 0.0638696953990543 0 0.027160512035202  
0.00172011771694638 0.0238165758344066 0.203234215693309  
0.256100953103886 0 0.0295160140726908 0 0 0 0.404  
0.0270881659211194 1.06473101116154

TCGA-BT-A2LA-01A-11R-A18C-07 0.163627770810987 0 0 0.196341786050382  
0 0.0478301260715379 0 0.105040233668537 0 0 0  
0.0522041392308615 0.0255602434376126 0.250268280012737 0  
0.0424455163262071 0 0.0123228933385841 0 0.0966123463664721  
0.00774666468608188 0 0.852 -0.0205793148455593 1.10972003079132

TCGA-4Z-AA87-01A-11R-A39I-07 0 0.0373488006058858 0.0162529558933627  
0.212064010358719 0 0 0.094230779417615 0.0405724470888005  
0.0468835735066916 0 0.0319870992621258 0 0.00753048178113474  
0.11311457040828 0.0921863577857625 0.0903505236025175  
0.217195894524589 0 0 0 0.000282505764515594 0 0.093  
0.114522583706275 1.03638046323434

TCGA-BT-A2LB-01A-11R-A18C-07 0.0352900280502239 0.00390350933381304  
0.033033450892688 0.148388337130015 0 0.0432262494627057  
0.136590196289918 0.0361258909939496 0 0 0.037680410292203 0  
0.000619630467191522 0.0690198817858309 0.124987133780192  
0.123197722353393 0.0203679926229427 0.113200497209367  
0.0154921104327913 0 0 0.0588769589027751 0.045 0.16703972869181  
1.01952064372692

TCGA-XF-A8HB-01A-11R-A36F-07 0 0.0796197868229479 0 0 0  
0.19348938693971 0 0.0860703367879571 0 0 0.00666330066138225  
0.0214276256339402 0.0369173223106726 0 0.00209639316984026  
0.266075844608921 0.0846370327111765 0.184543006792821  
0.0384599635606304 0 0 0 0.404 0.0270549594287334  
1.0670846910291

TCGA-DK-A2I6-01A-12R-A18C-07 0 0.0492874441021313 0.00389350310992312  
0.138401175734078 0 0.26143000819897 0.0527055585050532

0.00584945271043376 0 0 0.0541103594817203 0 0.0193506544827501  
 0.0741549503827014 0.0258932759248172 0.0755606307441108  
 0.0127057141670004 0.210808245617215 0 0.0155627779658261 0  
 0.000286248873268761 0.109 0.104643949767859 1.05429965342296  
 TCGA-ZF-AA4X-01A-11R-A38B-07 0.0544344965143941 0.0513011824009197 0  
 0.0717569181890369 0 0.00800129210775991 0.000410163097923529  
 0.0515195248392046 0 0 0.0794859340057897 0 0.0102768495715489  
 0.12559048930199 0 0.0789251289645932 0 0.412797737521433  
 0.0527085597773698 0 0.00279172370803594 0 0.805 -  
 0.0171284038755522 1.12967697497874  
 TCGA-BT-A20P-01A-11R-A14Y-07 0 0.0540990632432298 0.0268060676686123  
 0.156356670924528 0 0.156739348916407 0 0.0261465712732071 0 0  
 0 0.0779942967816545 0.0114509012447368 0.0826771249719651 0  
 0.199890932548953 0.000104877384017294 0.203434192655116 0  
 0.00429995238757379 0 0 0.388 0.0286014225536384 1.08180460615253  
 TCGA-BT-A20W-01A-21R-A14Y-07 0.150294794536117 0 0.00438079550935992  
 0.247573577252495 0 0.100494915937252 0.0154261292257204  
 0.0860927497249945 0.0985933628702006 0 0 0.025098211875094  
 0.0269789823123881 0.0229862955942421 0.0595550008693183  
 0.0814765585008338 0.0111761287350144 0.0203542340963925  
 0.0461060738601096 0 0.00341218910046779 0 0.108 0.106754248806746  
 1.05930109315519  
 TCGA-FD-A5BX-01A-11R-A26T-07 0 0.00900967966921827 0 0.0689571633599578  
 0 0.105341377371789 0.00512009097198749 0 0 0.0154534129504062 0  
 0.0184692561916681 0.0146243248435296 0.319718881275999  
 0.0540585799678201 0.229822815875267 0.122081669875021 0  
 0.0373427476473361 0 0 0 0 0.65178899821256 0.774492986085764  
 TCGA-BL-A13J-01A-11R-A10U-07 0.0294025304772864 0 0.0117135214353761  
 0.131744586531937 0 0 0.0896280306205653 0.0297775773173645  
 0.0197320875161285 0 0.0388474032568929 0 0 0.243361255353356  
 0.118498871000622 0.17381266607062 0 0.0506723711344959  
 0.0606882121919556 0 0 0.00212088709339808 0.666 -  
 0.00444174452763401 1.09605638030204  
 TCGA-CF-A8HX-01A-11R-A36F-07 0 0.110567821014039 0.0344779270947906 0  
 0.0293957538489678 0.224366131510723 0 0 0.00637744938321581 0  
 0.0357243654604726 0.00397155429579291 0.00883667567954643 0 0  
 0.160148175911747 0.163751090069315 0.218394921280618 0 0 0  
 0.0039881344507722 0.596 0.00454834057821427 1.08164709514866  
 TCGA-PQ-A6FI-01A-11R-A31N-07 0.0191165672537319 0 0.0051320879346423  
 0.151907802597491 0 0.117911184522454 0.10583551155648  
 0.0675934402122755 0 0 0.0289192685911823 0.0474361669947617  
 0.0405308722630461 0.0681633332319101 0.0190207750995319  
 0.0556730513240015 0 0.218584794012097 0.053872676833215 0 0  
 0.000302467573179275 0.096 0.112486185053192 1.04612771331176

TCGA-FJ-A3Z7-01A-12R-A23N-07 0.173380026380347 0 0.0307618671347847  
0.200517679851919 0 0.173177250051633 0.0454452460483521  
0.0359985484860265 0 0 0.0328227126123157 0 0.00674187344187702  
0.0749891874532296 0.13159369414148 0.0606884750530038 0  
0.00844082196033229 0 0.0254426173847003 0 0 0.06399999999999999  
0.145171446081897 1.04200782968357

TCGA-E7-A7PW-01A-11R-A352-07 0 0.174211045741378 0.014844104601043  
0.219864620943098 0 0.127271404449226 0 0.0469978204274994  
0.0245164286860204 0 0 0.0564866321745944 0.0297827031441031  
0.116698209942922 0.0723865507351738 0.0183602068268399  
0.0200530068407704 0.0489469865196978 0 0.025319229391719  
0.00426104957591404 0 0.085 0.123793838175378 1.04612291519021

TCGA-4Z-AA7S-01A-11R-A39I-07 0.03855234422224 0.114372796128428  
0.00693141132596463 0.0267737899633859 0.00131838459646738  
0.103640849357864 0 0.136831556934005 0.000370224830922236 0 0  
0 0 0 0.00611923798275547 0.1625781258574 0.0505895754859053  
0.163117675094227 0.171761127625297 0 0 0.017042900595138 0.501  
0.0144329897882992 1.06639229328205

TCGA-CF-A3MH-01A-11R-A20F-07 0 0.120632445350537 0.0191521521692921  
0.0815308791014867 0.151073862078352 0.0246992076073522 0  
0.0377236466986727 0 0.0495169966300013 0 0 0.00539498242181975 0  
0.00784536842053568 0.0845949001016767 0.175990878729547  
0.175559918067765 0 0.0470916650354311 0.00540454539646605  
0.0137885521910653 0.382 0.0296738784297058 1.06822944542458

TCGA-DK-A6B2-01A-11R-A30C-07 0.154012391751101 0 0.122973732937242  
0.0857114480712387 0 0.0889384391913207 0.0207743891459745  
0.0216983896357379 0.0370747401343437 0 0 0.0166727363185281  
0.00437726992965323 0.0808841066216041 0.117000306914258  
0.137889201828028 0.0148032390722645 0.0282763311601191  
0.0675720728127717 0 0 0.00134120447581506 0.001 0.476189094778874  
0.879042752105645

TCGA-4Z-AA86-01A-11R-A39I-07 0.0147914660178928 0 0.00320101729074147  
0.111356420252201 0 0.226536492901984 0.0739285460281792  
0.00153256889681364 0.000627673290209266 0 0.0911794252235477 0 0  
0.222312307423709 0.0751811425251511 0.10815057066468 0 0 0  
0.07120236948489 0 0 0.06000000000000001 0.147490202557972  
1.0352743853833

TCGA-BL-A0C8-01B-04R-A277-07 0 0 0.00761135033039761 0 0  
0.169936108909454 0 0.0421504845638924 0 0 0.0201178623777716 0  
0.00794119669387085 0 0 0.316449238576246 0 0.201830811467233  
0.0242082648549524 0 0.209754682226183 0 0.962 -0.03398846428801  
1.10191289538818

TCGA-5N-A9KI-01A-31R-A42T-07 0.0120887921453537 0.0793553819595273  
0.0168877349835271 0.0408679972564542 0 0.117688206102285 0

|                              |                     |                    |                      |                    |                     |
|------------------------------|---------------------|--------------------|----------------------|--------------------|---------------------|
| 0.0456325315061539           | 0.0244312428716828  | 0                  | 0                    | 0.0245058454771323 | 0                   |
| 0.106820481972378            | 0.0636832070068712  | 0.254379908236916  |                      |                    |                     |
| 0.0125680612558488           | 0.0839492624053475  | 0.0531802586292581 | 0                    |                    |                     |
| 0.000133529185401668         | 0.0638275590058623  | 0.239              | 0.0571943752940214   |                    |                     |
| 1.05636431178817             |                     |                    |                      |                    |                     |
| TCGA-GU-AATO-01A-11R-A39I-07 | 0                   | 0.0240602075571968 | 0.118205651746503    |                    |                     |
| 0.148538805898586            | 0                   | 0.0652612351326635 | 0.0973857359243625   |                    |                     |
| 0.0796288722809943           | 0.0279046448531572  | 0                  | 0                    | 0.0219809402218897 |                     |
| 0.0115024069680977           | 0.0801163279973794  | 0.0906966141261359 |                      |                    |                     |
| 0.136568527855602            | 0.00472776893168366 | 0                  | 0.0523206625337926   | 0                  | 0                   |
| 0.0411015979719565           | 0.011               | 0.245250260557601  | 0.982170861585115    |                    |                     |
| TCGA-CF-A9FH-01A-11R-A38B-07 | 0                   | 0                  | 0.000834780889498668 |                    |                     |
| 0.0687148927178948           | 0.108801026678444   | 0                  | 0                    | 0.0573323204180079 |                     |
| 0.0144064147570407           | 0                   | 0                  | 0.0524678094842327   | 0.0245412095785612 | 0                   |
| 0.022748732232834            | 0.0809635657143131  | 0                  | 0.507772332467009    |                    |                     |
| 0.0508089260774053           | 0                   | 0.0106079889847588 | 0                    | 0.0649999999999999 |                     |
| 0.14381644572871             | 1.08716223480948    |                    |                      |                    |                     |
| TCGA-FD-A6TG-01A-11R-A32O-07 | 0.0801460607936454  | 0                  | 0.103251485701707    |                    |                     |
| 0.122988633230392            | 0                   | 0.0138126165480958 | 0                    | 0.0898941475881283 |                     |
| 0.0109687335932024           | 0.00521550366076802 | 0                  | 0.0517930207206097   |                    |                     |
| 0.0138618113273198           | 0.0709888335583269  | 0.0867846876815792 |                      |                    |                     |
| 0.156364903564402            | 0.0653408520695525  | 0                  | 0.128588709962271    | 0                  | 0                   |
| 0.006000000000000001         | 0.309338048225933   | 0.95423127076135   |                      |                    |                     |
| TCGA-4Z-AA7O-01A-31R-A39I-07 | 0.0616145240360123  | 0                  | 0.0482276376750649   |                    |                     |
| 0.308747348583891            | 0                   | 0.113736109221792  | 0                    | 0.109642496488819  | 0                   |
| 0                            | 0.0836581215931919  | 0.018906333753568  | 0                    | 0.0405237387731914 |                     |
| 0.0602475812025492           | 0.0266348437712117  | 0.0879874847947161 |                      |                    |                     |
| 0.0288559338058044           | 0                   | 0                  | 0.0112178463001882   | 0.032              | 0.185028822369125   |
| 1.03047345425241             |                     |                    |                      |                    |                     |
| TCGA-GV-A3QI-01A-11R-A22O-07 | 0.0714839954203526  | 0                  | 0                    | 0                  |                     |
| 0.00241979105652253          | 0.304679161295846   | 0                  | 0                    | 0                  | 0.0959974182060377  |
| 0                            | 0.00868592608607481 | 0.140158517496073  | 0.0025282584856308   |                    |                     |
| 0.190946447417746            | 0.0232994007635391  | 0.0551429798723175 |                      |                    |                     |
| 0.10465810389986             | 0                   | 0                  | 0                    | 0.618              | 0.00159893977257481 |
| 1.07600120174014             |                     |                    |                      |                    |                     |
| TCGA-DK-A6AV-01A-12R-A30C-07 | 0.22289606245504    | 0                  | 0.0141573160499918   |                    |                     |
| 0.2089392545675              | 0                   | 0.0815469045122903 | 0                    | 0.119357912635073  |                     |
| 0.00998098942501931          | 0                   | 0                  | 0                    | 0.022876466644473  | 0.072092683558906   |
| 0.0573958858624926           | 0.0651657969311956  | 0                  | 0.0915256216193723   | 0                  |                     |
| 0.0252646648417337           | 0.00880044089691289 | 0                  | 0.007000000000000001 |                    |                     |
| 0.294139641935754            | 0.969503697715047   |                    |                      |                    |                     |
| TCGA-DK-A1A3-01A-11R-A13Y-07 | 0.149955783494793   | 0                  | 0.0757088148512233   |                    |                     |
| 0.0859930511545209           | 0                   | 0.118271908040294  | 0.0362663730538043   |                    |                     |
| 0.0541375100741668           | 0.0227051792925028  | 0                  | 0                    | 0.0339329606273004 |                     |



|                               |                    |                     |                     |                     |                     |
|-------------------------------|--------------------|---------------------|---------------------|---------------------|---------------------|
| 0.0248600007948882            | 0.0598253262411009 | 0.0394784980225931  |                     |                     |                     |
| 0.115157278651112             | 0.0381441445777295 | 0.0606621720215786  |                     |                     |                     |
| 0.0849009991023916            | 0                  | 0                   | 0                   | 0.004               | 0.339140648789375   |
| 0.941634869329982             |                    |                     |                     |                     |                     |
| TCGA-GD-A6C6-01A-21R-A31N-070 | 0.0314024517543714 | 0.0105500547340415  |                     |                     |                     |
| 0.173430418654082             | 0                  | 0                   | 0                   | 0.0495039637901207  | 0.054745549816253   |
| 0                             | 0.0751860672462185 | 0.011209079340862   | 0.135437990937555   | 0                   |                     |
| 0.213484938491741             | 0                  | 0.153552953628704   | 0.0889754281773412  | 0                   | 0                   |
| 0.002521103428709             | 0.18               | 0.0758009279802776  | 1.05378360893041    |                     |                     |
| TCGA-GC-A3RD-01A-12R-A22U-070 | 0.0200926372759582 | 0                   | 0.0282928047446684  |                     |                     |
| 0                             | 0.0551897830923574 | 0                   | 0.0245121751718842  | 0.00850794825456906 | 0                   |
| 0.0687440839783988            | 0                  | 0                   | 0.428317404954192   | 0.00197901306169818 |                     |
| 0.0951816588419451            | 0                  | 0                   | 0.234677135275272   | 0.0241028110687221  |                     |
| 0.0104025442803344            | 0.077              | 0.132572561352213   | 1.08748139387643    |                     |                     |
| TCGA-BT-A20R-01A-12R-A16R-07  | 0.0738385139210928 | 0                   | 0.00834340660839761 |                     |                     |
| 0.0184321364857336            | 0                  | 0.0579633257229553  | 0                   | 0                   | 0.00125247381127205 |
| 0                             | 0.0307340411222581 | 0                   | 0.652823928183147   | 0.0276975696375755  |                     |
| 0.0822726586882569            | 0                  | 0                   | 0.0466419458193109  | 0                   | 0                   |
| 0.529154784749289             | 0.857186841679081  |                     |                     |                     |                     |
| TCGA-XF-A9T0-01A-11R-A39I-07  | 0.0446479270628773 | 0                   | 0.189452412215983   |                     |                     |
| 0.15318453099271              | 0                  | 0.0470239444260752  | 0.0874177312806296  | 0                   | 0                   |
| 0.0360062942245469            | 0                  | 0.0108095567115972  | 0.167199579388385   |                     |                     |
| 0.0796358117108129            | 0.127023368680668  | 0.0183597558747621  | 0                   | 0                   |                     |
| 0.0327099259346334            | 0                  | 0.00652916149631916 | 0.003               | 0.352295450162787   |                     |
| 0.940572961396877             |                    |                     |                     |                     |                     |
| TCGA-YF-AA3M-01A-11R-A42T-07  | 0.0237448234213465 | 0.028990561332716   |                     |                     |                     |
| 0.111701221802447             | 0                  | 0                   | 0.0367484717309138  | 0.0348654033687184  |                     |
| 0.0307488179147593            | 0                  | 0                   | 0.0273808972684568  | 0.147862747916365   | 0                   |
| 0.117170435694                | 0.0573230608318354 | 0.136467413719665   | 0.196683246170561   |                     |                     |
| 0                             | 0.0187300231554616 | 0.0315828756727539  | 0.218               | 0.0621637582057291  |                     |
| 1.04951650489496              |                    |                     |                     |                     |                     |
| TCGA-4Z-AA7Y-01A-11R-A39I-07  | 0.0111773074592915 | 0                   | 0.0886112207787856  |                     |                     |
| 0                             | 0.20087936275717   | 0                   | 0.0585837148341559  | 0                   | 0                   |
| 0.123286657062362             | 0.0473000587839545 | 0.074548281365475   | 0                   |                     |                     |
| 0.122075356334264             | 0.055905164570396  | 0.169842951623915   |                     |                     |                     |
| 0.0411766899559673            | 0                  | 0                   | 0.00661323447426267 | 0.631               | -                   |
| 0.000465625989855082          | 1.09139579537453   |                     |                     |                     |                     |
| TCGA-FD-A62O-01A-11R-A30C-07  | 0.0897400792497386 | 0                   | 0.124112472086995   |                     |                     |
| 0.0751597128496099            | 0                  | 0.0921280446501402  | 0                   | 0.0149848326936606  |                     |
| 0.0309001486615856            | 0                  | 0                   | 0.0119166316543429  | 0.165552301353567   | 0                   |
| 0.114181798199362             | 0                  | 0.095673355854945   | 0                   | 0.108288193013057   | 0                   |
| 0.0773624297329964            | 0.124              | 0.0973550613562641  | 1.05003377578996    |                     |                     |
| TCGA-BL-A3JM-01A-12R-A21D-07  | 0.0263448541315035 | 0                   | 0.0113763182670943  |                     |                     |
| 0.0700834424031177            | 0                  | 0.0315156424283183  | 0.021089838813406   |                     |                     |

|                               |                      |                     |                     |                    |                    |   |
|-------------------------------|----------------------|---------------------|---------------------|--------------------|--------------------|---|
| 0.0536762258554395            | 0.00257617003248005  | 0.032799206574072   | 0                   |                    |                    |   |
| 0.0194752576905122            | 0                    | 0.459223253641276   | 0.128042936234188   |                    |                    |   |
| 0.0854592225927529            | 0.00568935835351723  | 0                   | 0.052648272982323   | 0                  | 0                  | 0 |
| 0                             | 0.663728531959323    | 0.757963577095113   |                     |                    |                    |   |
| TCGA-FJ-A3ZF-01A-11R-A23N-07  | 0                    | 0.102668386880652   | 0.0352977336193645  |                    |                    |   |
| 0.201523577880513             | 0                    | 0                   | 0.0576301982159454  | 0.067953702109823  | 0                  |   |
| 0                             | 0.0990297015319789   | 0.0178130414379462  | 0.0147847558512673  |                    |                    |   |
| 0.00826668994929836           | 0.192930072669425    | 0                   | 0.132705721353663   |                    |                    |   |
| 0.0693964185001239            | 0                    | 0                   | 0.151               | 0.0832620201337696 |                    |   |
| 1.05174913302457              |                      |                     |                     |                    |                    |   |
| TCGA-CU-A0YO-01A-11R-A10U-070 | 0.00762504588020465  | 0.0270989703114995  |                     |                    |                    |   |
| 0.02425912279698              | 0.100994010393388    | 0                   | 0.154511837887107   |                    |                    |   |
| 0.0399233966853753            | 0.0297510364828894   | 0.0510816394724039  | 0                   | 0                  |                    |   |
| 0.0410763544708403            | 0                    | 0.0423912391084022  | 0.0613766752998848  |                    |                    |   |
| 0.0889999275179629            | 0.0538901140750182   | 0.141284926467551   |                     |                    |                    |   |
| 0.121336550642414             | 0                    | 0.00366986163309716 | 0.0107292908749805  | 0.069              |                    |   |
| 0.13934531597893              | 1.02433410581946     |                     |                     |                    |                    |   |
| TCGA-CF-A5UA-01A-11R-A28M-070 | 0.0818374843966048   | 0.0121508158954502  |                     |                    |                    |   |
| 0.205884548013692             | 0                    | 0.0578053912804885  | 0                   | 0.0756104132218403 |                    |   |
| 0.038211993432033             | 0                    | 0.00667617626129881 | 0.00495401922241635 | 0                  |                    |   |
| 0.115872617388841             | 0                    | 0.159569049068235   | 0.190104623720209   |                    |                    |   |
| 0.0231644455045125            | 0.0281584225943793   | 0                   | 0                   | 0                  | 0.089              |   |
| 0.121238332225877             | 1.03453675946911     |                     |                     |                    |                    |   |
| TCGA-K4-AAQO-01A-11R-A38B-070 | 0.237015245677014    | 0                   | 0.0665893545771775  |                    |                    |   |
| 0.0918241012851361            | 0                    | 0.0566355779157287  | 0.0115238012339253  |                    |                    |   |
| 0.0202729787561416            | 0.0511277366733376   | 0                   | 0                   | 0.0404870251159324 |                    |   |
| 0.0165521413483128            | 0.0250139663743199   | 0.0624494375275065  |                     |                    |                    |   |
| 0.156678246058185             | 0.0273818058067983   | 0.0126290656217102  |                     |                    |                    |   |
| 0.123819516028775             | 0                    | 0                   | 0.001               | 0.438601937283686  |                    |   |
| 0.897852443434941             |                      |                     |                     |                    |                    |   |
| TCGA-XF-AAMJ-01A-11R-A42T-07  | 0.156829135133872    | 0                   | 0.153166101124879   |                    |                    |   |
| 0.0816010570490158            | 0                    | 0.0154179534395639  | 0.0220816305417352  |                    |                    |   |
| 0.0328124082437623            | 0.0295841929200627   | 0                   | 0.00297403228336201 |                    |                    |   |
| 0.020880427298853             | 0                    | 0.222224735756658   | 0.0908679682757979  |                    |                    |   |
| 0.0900579366847055            | 0.000865003795568243 | 0                   | 0.072373057877131   | 0                  | 0                  |   |
| 0.00826435957503293           | 0.002                | 0.388673010041457   | 0.92432745379107    |                    |                    |   |
| TCGA-GU-A763-01A-11R-A32O-070 | 0.0866170437059448   | 0                   | 0.178023133547064   |                    |                    |   |
| 0                             | 0.110265929256667    | 0                   | 0.202166384753784   | 0                  | 0.0426210373591343 | 0 |
| 0.0668115443107151            | 0                    | 0                   | 0.0324579993041592  | 0.0851556671151795 |                    |   |
| 0.107091360443402             | 0.064139167543058    | 0.024650732660892   | 0                   | 0                  | 0                  |   |
| 0.201                         | 0.0670293538874386   | 1.07527243949689    |                     |                    |                    |   |
| TCGA-G2-A2EC-01A-11R-A180-07  | 0.0484600546624105   | 0                   | 0.101812550000665   |                    |                    |   |
| 0.0529793888678929            | 0                    | 0.339389310040926   | 0.00853305090982729 |                    |                    |   |
| 0.031995520896277             | 0.130074604414068    | 0                   | 0                   | 0.0440311380281512 |                    |   |

0.00329725794488122 0 0.0115545313645994 0.0608781611792901  
0.0202873321263703 0.0580442157767612 0.0886628837878789 0 0 0  
0.018 0.225437678527374 1.00507941252037  
TCGA-FD-A3B7-01A-31R-A20F-07 0.0238217064565235 0.00126186126279843  
0.00640211389223643 0.309612196688941 0 0.0118808588878625  
0.154855181369946 0 0 0 0.033711854881314 0 0  
0.167658511451302 0.106860164671754 0.123235009239311  
0.0113175434205719 0.00259629569107886 0 0.0278466098660335 0  
0.0189400922203273 0.051 0.160370940524079 1.02818736800981  
TCGA-FD-A5C0-01A-11R-A28M-07 0.0493543045287493 0 0 0.17685272721891  
0 0.216816174061758 0 0.0157498114279913 0 0 0 0  
0.0445482717305989 0.0749180223833975 0.0367252189050054  
0.203946376240701 0 0.033255230248735 0.0223595073258348  
0.110046977873195 0 0.0154273780551232 0.099 0.108649126526769  
1.04242732683426  
TCGA-FD-A5BS-01A-21R-A26T-07 0.000312285870756893 0.0319089793710592  
0.0616660555383875 0.26203144147194 0 0.0897239568436186  
0.0553599553025992 0.0281611143466454 0.0463879194437011 0  
0.0446754842789627 0.0405730335895658 0.0132580038387031  
0.111817769205946 0.119753907110209 0.0770987804901535 0 0  
0.01510079263811 0 0 0.00217052065964077 0.04 0.175535731598643  
1.02805835600513  
TCGA-CU-A0YN-01A-21R-A10U-07 0.0212745744794416 0 0.00252986076112043  
0.142570011796881 0 0.268600771034345 0.00526347604147159 0 0 0  
0.0399925849296431 0 0 0.229634793041709 0.0169801013461576  
0.0799772660970072 0.0399139404654695 0.0311245219059082 0  
0.0958830273437439 0 0.0262550707571013 0.111 0.103609622597282  
1.05474594518033  
TCGA-FD-A5BZ-01A-11R-A28M-07 0.110614015416635 0 0.00934249140006939  
0.00614476826217387 0 0.0639117045160342 0 0.0328492368836819  
0.0220304556264652 0.0077842807958316 0 0.0166444819731673 0  
0.423824793486204 0.0876882541342692 0.114395768036805 0 0  
0.104769749468663 0 0 0 0.039 0.177672073307968  
1.03655234206671  
TCGA-UY-A9PE-01A-11R-A38B-07 0.0970072573609013 0 0.180439714610145  
0.0212653193413354 0 0 0 0.0647849947537562 0.0127454321878715  
0.00867338236864563 0 0.0354158336342644 0 0.341279852814504  
0.120160656477713 0.0681661026978935 0 0 0.0500614537529706 0 0  
0 0.006000000000000001 0.310991964339574 0.972848539533355  
TCGA-GV-A40E-01A-12R-A23N-07 0 0.0022526859527009 0.00199205086118947  
0.148096610057725 0 0.0826944787688251 0.111482055872839  
0.0112653143271141 0 0 0.0606643400601248 0 0.00789584121743692  
0.153377713448076 0.0117082525023284 0.126901374704366 0  
0.185148476758108 0 0.0744550058831963 0 0.0220657995859693 0.07

0.137148664652421 1.03371127065185  
 TCGA-BT-A2LD-01A-12R-A20F-07 0.0161853784873138 0 0.0888576352575037  
 0.130510314295147 0 0.0950848341891508 0.0486215956722398  
 0.0862553322201806 0.0180806985072457 0 0 0.0151868965417704 0  
 0.0811090755227755 0.141351337229824 0.227975117942312 0  
 0.0044208382451354 0.0438675708730614 0 0 0.00249337501633984 0.044  
 0.169092780924129 1.01918562754968  
 TCGA-UY-A9PD-01A-11R-A38B-07 0.0490784913147695 0 0.156665742107126  
 0.0284616461673388 0 0 0.0289833554323312 0.0347325384261749 0  
 0.0142611653947982 0 0 0.49908976085771 0.0691024578886472  
 0.100360437906077 0 0 0.0192644045050281 0 0 0 0.017  
 0.226390539210551 1.03481611922627  
 TCGA-G2-AA3B-01A-11R-A39I-07 0.048986545652094 0 0.014776428357493  
 0.140170236593226 0 0 0.279353989481614 0.14177510389533  
 0.0785280306366513 0 0.0834612216502705 0 0 0.00590681202457452  
 0.0385745063808786 0.0483394319571998 0.0130241588350416  
 0.0944606427334621 0.0123871637549173 0 0 0.000255728047247118  
 0.129 0.0946780250309238 1.06203771653727  
 TCGA-K4-A54R-01A-11R-A26T-07 0 0 0.00498165451516556 0.236476024227253  
 0 0.0736065712568648 0.134243201814511 0.0091156370607345 0 0  
 0.176770920648523 0 0 0.0655969217602795 0.146900249168659  
 0.104158692417094 0.00495893731074113 0.00723329902927789  
 0.0359578907908972 0 0 0 0.001 0.439649228735418  
 0.899960307078292  
 TCGA-DK-A1AA-01A-11R-A13Y-07 0 0.0323575069095716 0 0 0  
 0.225063822162384 0 0.0207688311015946 0.0277273328530175  
 0.014317492982542 0 0.0615979652911754 0.0186578258908554 0  
 0.0306902881335191 0.117488362907607 0.223576516696554  
 0.10160149032748 0.116554626952528 0 0 0.00959793779117156 0.337  
 0.0364746394947159 1.05908628084943  
 TCGA-CU-A5W6-01A-11R-A28M-07 0.0559171205320436 0 0.135509793509881  
 0.0538200837302194 0 0.13329659062892 0 0.0386910738173794  
 0.00942185466605268 0 0 0.0647149896340168 0.0101267870829245  
 0.0869295538992819 0.0196439150337914 0.0714115163480708  
 0.0145707292142156 0.195963477978708 0.0692530529627383 0 0  
 0.0407294609617563 0.009000000000000001 0.265249857998391  
 0.976255592084798  
 TCGA-DK-AA6R-01A-11R-A42T-07 0 0.0054560914021689 0 0 0  
 0.0415681874590793 0.091215256380088 0.139401595938301  
 0.00978109834975106 0 0.138168724357143 0.0204345366732852  
 0.00328054624722083 0.107712550736588 0.159216291664172  
 0.0189137920651684 0.0842071272717484 0.178790669081495 0 0  
 0.00185353237379035 0 0.039 0.176759449490255 1.03895075741679  
 TCGA-BT-A3PH-01A-11R-A220-07 0 0.0530516984700821 0 0.0636699396706547

|                              |                     |                      |                      |                      |                   |   |  |
|------------------------------|---------------------|----------------------|----------------------|----------------------|-------------------|---|--|
| 0                            | 0.144987361339984   | 0                    | 0.0602644340886274   | 0                    | 0                 | 0 |  |
| 0.00886919011647096          | 0                   | 0.102580714588921    | 0                    | 0.145409714127176    | 0                 |   |  |
| 0.187458382680421            | 0.198625372618282   | 0                    | 0.00388246347114559  |                      |                   |   |  |
| 0.0312007288282352           | 0.469               | 0.0187902261089963   | 1.07065015746568     |                      |                   |   |  |
| TCGA-BL-A13I-01B-04R-A277-07 | 0.0156775601111426  | 0                    | 0.00137635450970935  |                      |                   |   |  |
| 0.00124213574624336          | 0                   | 0.186618101744243    | 0.00525644867161043  |                      |                   |   |  |
| 0.00751058856515946          | 0                   | 0                    | 0.000920176202565849 | 0.00168518663414294  |                   |   |  |
| 0.0312170702708959           | 0                   | 0.0454618276796871   | 0.649833180648861    | 0                    | 0                 | 0 |  |
| 0.042595320629547            | 0.0106060485861919  | 0                    | 0.001                | 0.433641774879654    |                   |   |  |
| 0.904229431005186            |                     |                      |                      |                      |                   |   |  |
| TCGA-CF-A3MF-01A-12R-A21D-07 | 0                   | 0.00179218729853774  | 0.075737302098782    |                      |                   |   |  |
| 0.244515878628718            | 0.0155477522948802  | 0                    | 0                    | 0.105542717121009    |                   |   |  |
| 0.0193282851860172           | 0                   | 0.0289644557136446   | 0                    | 0.0219876332135315   | 0                 | 0 |  |
| 0.242792908575616            | 0.0473061967212926  | 0.159120077362185    | 0                    |                      |                   |   |  |
| 0.0346493859901204           | 0                   | 0.00271521979566598  | 0.24                 | 0.057009083221792    |                   |   |  |
| 1.06182109038431             |                     |                      |                      |                      |                   |   |  |
| TCGA-CF-A47T-01A-11R-A23W-07 | 0.0578110913496275  | 0.0302964339412014   | 0                    |                      |                   |   |  |
| 0.134931572044935            | 0                   | 0.120652752912957    | 0                    | 0.116461042139685    |                   |   |  |
| 0.010900455116166            | 0                   | 0.011989119976966    | 0.013164467351764    |                      |                   |   |  |
| 0.0600553917872409           | 0                   | 0                    | 0.159254358280367    | 0.171557978480462    |                   |   |  |
| 0.107141490342079            | 0.00167196955976614 | 0.000965704621903958 | 0                    |                      |                   |   |  |
| 0.00314617209488056          | 0.118               | 0.101645363271633    | 1.03961476600228     |                      |                   |   |  |
| TCGA-YC-A8S6-01A-31R-A38B-07 | 0                   | 0.0107065813900202   | 0                    | 0.0240867295812396   |                   |   |  |
| 0                            | 0.183244138923671   | 0.0495153784542469   | 0                    | 0.0945028430176809   | 0                 | 0 |  |
| 0                            | 0.0737021099001622  | 0                    | 0.00373372731267506  | 0.100857888514719    |                   |   |  |
| 0.0591127529571861           | 0.165727470408681   | 0.094473812295817    |                      |                      |                   |   |  |
| 0.0960586880834813           | 0.00974956759243713 | 0.0345283115679832   |                      |                      |                   |   |  |
| 0.008000000000000001         | 0.279049431081609   | 0.967415917063418    |                      |                      |                   |   |  |
| TCGA-DK-A3IS-01A-21R-A21D-07 | 0                   | 0.00447673225781637  | 0                    | 0.286211233138383    |                   |   |  |
| 0                            | 0.0692751999668415  | 0.0794531120192574   | 0.158313456691568    |                      |                   |   |  |
| 0.00364624990038983          | 0                   | 0                    | 0.0479795670696481   | 0.00790873411056472  | 0                 |   |  |
| 0.0744667221495415           | 0.081421496793542   | 0.0808710644254939   |                      |                      |                   |   |  |
| 0.0314540043654807           | 0.0699317483557463  | 0                    | 0                    | 0.00459067875572665  | 0.486             |   |  |
| 0.0173443411704608           | 1.09863705974776    |                      |                      |                      |                   |   |  |
| TCGA-XF-A9SJ-01A-11R-A39I-07 | 0.0957961539018802  | 0                    | 0.0671382410511746   |                      |                   |   |  |
| 0.232532246043005            | 0                   | 0.093969958615876    | 0.077970467296661    |                      |                   |   |  |
| 0.0194186255566076           | 0.0147461124644083  | 0                    | 0.0590329974268572   |                      |                   |   |  |
| 0.00758583882023102          | 0.0143730645268105  | 0.0506840947144037   |                      |                      |                   |   |  |
| 0.106185615867768            | 0.131192111879974   | 0.00658635931433568  | 0                    |                      |                   |   |  |
| 0.0227881125200067           | 0                   | 0                    | 0                    | 0.007000000000000001 | 0.296443710026154 |   |  |
| 0.965365909353848            |                     |                      |                      |                      |                   |   |  |
| TCGA-DK-AA6T-01A-11R-A39I-07 | 0.0658843904073441  | 0.52460740990776     | 0                    |                      |                   |   |  |
| 0.11948262312424             | 0                   | 0                    | 0.0256196010638407   | 0.0550017526747557   |                   |   |  |
| 0.0089321046785311           | 0                   | 0                    | 0.0175698405573666   | 0.00683400302869054  | 0                 |   |  |

0.00971418603062558 0.0613697038513511 0 0.0908956780633646  
 0.0140887066121298 0 0 0 0.001 0.406281673919073  
 0.933090465466346  
 TCGA-BT-A20N-01A-11R-A14Y-07 0.193737498867763 0 0.147922853623842  
 0.0674010377892181 0 0.0939467527441384 0.0161358989180631  
 0.0609892985293672 0 0 0.00321234282463845 0 0.00785941519045957  
 0.0605410601956608 0.151853979419203 0.0756957177095093  
 0.0950047856281855 0.0106486963471528 0 0 0 0.0150506622127989  
 0.00700000000000001 0.289360451426643 0.978679056717898  
 TCGA-C4-A0F6-01A-11R-A10U-07 0.0516675646198845 0 0.0596567772413303  
 0.184239562179064 0 0.0359236328775946 0 0 0  
 0.000604792953455357 0 0.0154378124974537 0 0.374487449775243  
 0.0374108576627804 0.188541872102521 0.00592853471715888  
 0.0102297935034794 0.0358713498700347 0 0 0 0.045  
 0.167321570109142 1.03829055095842  
 TCGA-CF-A7I0-01A-22R-A352-07 0.0936367815145695 0 0.0156639959883999  
 0.29199145763736 0 0.112519582871321 0.072523002065842  
 0.00289533912892501 0.0044203609557819 0 0 0.0482075641105047  
 0.0172316647854098 0 0.0291131647127271 0.102008772065411  
 0.0942167170420617 0.0128143959363442 0.102757201185342 0 0 0  
 0.269 0.0486661246225707 1.06731965882433  
 TCGA-FD-A3B6-01A-21R-A20F-07 0.0154742150913355 0 0.00687179267653065  
 0.191632233812612 0 0.118252949937472 0.127026010253372  
 0.050600662231904 0 0 0.0593324843847542 0 0.00209456323473358  
 0.139581318768085 0.0799208179957094 0.162952799606835  
 0.0109690515755885 0 0.0249080401235899 0 0 0.0103830603074779  
 0.01 0.247902685136259 0.985436437000611  
 TCGA-GC-A3YS-01A-11R-A23N-07 0 0.0125753816882938 0.0085018982047519  
 0.0207051334722131 0 0.277071449893358 0 0.0188790930891463  
 0.0324189561528496 0 0.017887599208668 0.0567998885323203 0  
 0.251413086839412 0.0149140912844206 0.137533621441011  
 0.0796106027784826 0.039386768598842 0.0314925298976353 0 0  
 0.000809898918595697 0.01 0.254361736108894 0.98566872301234  
 TCGA-XF-A9T2-01A-11R-A42T-07 0.00428723849872891 0 0.00010249360260405  
 0.0297896744041025 0 0.0503718513830767 0 0.0317222063695006  
 0.0329705865827046 0.00358641743703169 0 0.090554670416926 0  
 0.395057041424615 0.00341405652160635 0.148364262828774  
 0.0078631396331405 0 0.20116301169121 0 0 0.000753349205979316  
 0 0.658283602790049 0.767844977595874  
 TCGA-UY-A78O-01A-12R-A33J-07 0.183069609992503 0 0.134323394613298  
 0.0159777215521987 0.00872707439650404 0.0201501668794032 0  
 0.106594554504795 0 0.00194894210968962 0 0.0293678842449158 0  
 0.23329137786425 0.0195713434441609 0.0548305607122875  
 0.0459439278666329 0.0955588411818659 0.0506446006374957 0 0 0

0.002 0.375129403931258 0.930711554845125  
 TCGA-GC-A3OO-01A-11R-A22U-07 0.00626893890867077 0.0413081253836242  
 0.00121798592090915 0.0209860322926458 0 0.0581706030369897 0  
 0.0280970182174807 0.000152354748812191 0.000228235552831033 0  
 0.0192101353581911 0 0.385530999149769 0.031219528778269  
 0.214109764339526 0.0180143237357241 0.00985615041792521  
 0.145241075742774 0 0.0203887284158584 0 0.001 0.444277359273502  
 0.898221195174602  
 TCGA-E7-A6ME-01A-22R-A32O-07 0.0556170465286807 0 0.00562251459127475  
 0.329743568060098 0 0.115656617451954 0.0434169614535476  
 0.134196233530559 0.0325562731072524 0 0 0.0315105122964085  
 0.00123740313234338 0.0395975373584538 0.0634396100074066  
 0.0716817236756541 0 0.0517306192972239 0.0202602728218324 0 0  
 0.0037331066873109 0.0639999999999999 0.144784484384859  
 1.05676532844846  
 TCGA-XF-AAN5-01A-11R-A42T-07 0.0140363350485814 0 0.00369464905355514  
 0.169215872431089 0 0.131707739022012 0.125472155110611  
 0.0503368535065232 0 0 0.0583699879201668 0.0210977930224916 0  
 0.0971022785282187 0.0960713599260969 0.121132618949115  
 0.0273212165303131 0 0.0336698341120684 0.0153245668733914  
 0.0202863867664376 0.0151603531993288 0.017 0.22689500280068  
 0.994251456381801  
 TCGA-FD-A3SN-01A-12R-A22U-07 0 0 0.00604872421133705 0.239233006125664  
 0 0.0556150145564749 0.104888317767513 0.0392543506627105 0 0  
 0.0154699542502512 0.0467028935749633 0.00039595981891703  
 0.153368305243541 0.0570974798836598 0.177974752008757 0  
 0.0565762667193009 0.034537057168873 0 0 0.0128379180080368 0.091  
 0.119924083566529 1.04212715075613  
 TCGA-ZF-A9R2-01A-11R-A39I-07 0 0.0713725615835627 0.0287146718602557  
 0.0888685976705026 0 0.181287628477392 0 0.21880114543594 0 0  
 0.00471764139482917 0 0.0148487718047355 0.00267538888900694 0  
 0.132652272718611 0.0678290431318374 0.153537501971779 0 0  
 0.0236005681490455 0.0110942069125026 0.468 0.0190707388028368  
 1.08437531163875  
 TCGA-ZF-AA4T-01A-11R-A38B-07 0.0183996087627392 0.00453401389438615  
 0.00972785295199035 0.0576235323160128 0.004482626752061 0 0  
 0.0484964198092066 0.0496040955051279 0 0.0354496569105422 0 0  
 0.285360467297626 0.00630779138030045 0.00339637492582957 0  
 0.269324821668838 0 0.202079862532982 0 0.00521287529235762 0.261  
 0.0508855389583957 1.10609921696588  
 TCGA-E7-A4IJ-01A-31R-A26T-07 0.0124109304330777 0 0 0.261211491454528  
 0 0.0812151583837534 0.0302777293176443 0.199826756211053  
 0.0072387651268103 0.0910020391798968 0.0450191577906342  
 0.0256308144381688 0 0.0128599778260139 0.0343625897659717

0.0720139085816878 0.00955476082995946 0.0943749612922467  
 0.0230009593685539 0 0 0 0.14 0.0902640340939357 1.09226588750315  
 TCGA-FD-A6TE-01A-12R-A33J-07 0.0574501575614613 0 0.101365584708385  
 0.134457254669328 0 0.195125211786055 0.0601106616009861  
 0.136954807030388 0.000416037746203272 0 0.00477507637177741  
 0.0172958123319749 0.00282667271092782 0.0380874215301226  
 0.135974996552766 0.0282079620587054 0.0200776829181632  
 0.0339096159437469 0.0329650444790084 0 0 0 0.024  
 0.201703675329096 1.01742697205063  
 TCGA-H4-A2HO-01A-11R-A180-070.0916255458868729 0 0.0106496841759894  
 0.154131572590207 0 0.142230981481999 0.030259633370879  
 0.00742783516491888 0.109999620749888 0 0.0347048103959783 0  
 0.00403010860964109 0.223516100699123 0.00908882573818977  
 0.0630075483826 0.00472927579118513 0.0915138579008078 0  
 0.023084599061721 0 0 0.49 0.0169341801634733 1.08714365486894  
 TCGA-FD-A6TB-01A-12R-A33J-07 0.289941220650043 0 0.0563385815074002  
 0.135687955720223 0 0.0491771515028828 0.0940699331176379 0  
 0.0203583805392449 0 0 0.050651912688951 0 0.0789093257333341  
 0.0783169210844041 0.0905068898354419 0 0 0.0529068449576035 0 0  
 0.00313488266283332 0.001 0.450797419729163 0.891997524875581  
 TCGA-XF-AAN3-01A-11R-A42T-07 0 0.0247322360429259 0.00171016806420311  
 0.0345478796626047 0 0.196034969258914 0.00900539969699089  
 0.0364732214751905 0.0525677624288018 0 0.00726450531192211 0  
 0.00856670855514467 0 0.0185951655949 0.195661102845654  
 0.223909980723698 0.0788283708409273 0.0939768820140705 0 0  
 0.0181256474840521 0.036 0.179931751471055 1.00536195684618  
 TCGA-XF-AAMH-01A-11R-A42T-070.0496034857284206 0 0.0111437258417654  
 0.18240718102792 0 0 0.0542224839087071 0.00377491234580382  
 0.0102691117548945 0 0 0.0311883119086009 0 0.330219177688427  
 0.0179286136111572 0.196648808184569 0 0.0497613570292761  
 0.0628328309704581 0 0 0 0.151 0.0842810098606029  
 1.06649856475588  
 TCGA-FD-A3B8-01A-31R-A20F-07 0.0730837734559938 0 0 0.140391085404043  
 0 0.179740651617425 0.0616411065095197 0 0 0 0.051240405575785  
 0 0 0.0989106469739022 0.160138341974708 0.0973299459860337  
 0.0334464204731789 0 0.0851537444022633 0 0 0.0189238776271471  
 0.001 0.494118625175623 0.87052058632576  
 TCGA-XF-A9SY-01A-21R-A42T-07 0.028530474710956 0 0.00416587282739804  
 0.11692616190857 0 0.126985019956849 0.101533863667482  
 0.0203140823723412 0 0 0.0411337565742011 0.0242693854531186 0  
 0.166664878931124 0.134995684074162 0.123697697383179  
 0.00847664936205306 0 0 0.102306472778564 0 0 0.119  
 0.100085848086731 1.0557911554026  
 TCGA-CF-A9FF-01A-11R-A38B-07 0.398270165139288 0 0.048766241435248



|                              |                     |                     |                     |                    |                   |   |
|------------------------------|---------------------|---------------------|---------------------|--------------------|-------------------|---|
| 0.106615531009188            | 0                   | 0.0585312076143044  | 0.0054323044578606  |                    |                   |   |
| 0.0611928939355292           | 0.0683393144573459  | 0                   | 0                   | 0.0331187663517612 |                   |   |
| 0.00172513051474549          | 0.0453587176782046  | 0.0362695101629632  |                     |                    |                   |   |
| 0.0377208773252709           | 0                   | 0.0386040018944466  | 0.0600553380238444  | 0                  | 0                 | 0 |
| 0.018                        | 0.222639257661924   | 1.02525836296329    |                     |                    |                   |   |
| TCGA-XF-A9ST-01A-11R-A42T-07 | 0.241360863854057   | 0                   | 0.0277511200674898  |                    |                   |   |
| 0.0138013227307504           | 0                   | 0.0463946300439091  | 0                   | 0.0785674650829753 |                   |   |
| 0.0135621521005241           | 0                   | 0.0464225251053355  | 0                   | 0                  | 0.381044740561655 |   |
| 0.0170824606024782           | 0.102026617995569   | 0                   | 0.00897071923442437 | 0                  |                   |   |
| 0.0230153826208325           | 0                   | 0                   | 0.069               | 0.139132120025252  | 1.05510826601205  |   |
| TCGA-DK-A6B5-01A-11R-A31N-07 | 0                   | 0.00933671397417835 | 0.0140459265427774  |                    |                   |   |
| 0.11319184355306             | 0                   | 0.0383354586274257  | 0.00582381951269325 |                    |                   |   |
| 0.166059496416764            | 0                   | 0                   | 0                   | 0.0146426243275828 | 0.131489422745409 |   |
| 0.0800813378311038           | 0.113273004441732   | 0.158177666715517   |                     |                    |                   |   |
| 0.0530469172428767           | 0.0938744628839689  | 0                   | 0.00695858884649984 |                    |                   |   |
| 0.0016627163384113           | 0.188               | 0.0717628434444516  | 1.04986762109492    |                    |                   |   |
| TCGA-GC-A3RC-01A-11R-A22U-07 | 0.009115163939196   | 0                   | 0.00261530371717348 |                    |                   |   |
| 0.105100457382147            | 0                   | 0.236790035189725   | 0.00296419225959653 |                    |                   |   |
| 0.0317162517949981           | 0                   | 0                   | 0.0199639333126383  | 0.0266392086222962 | 0                 |   |
| 0.272721594376506            | 0.0435532520433273  | 0.182623202752417   |                     |                    |                   |   |
| 0.0252588087960729           | 0.0334022699680519  | 0.0075363258458543  | 0                   | 0                  | 0                 |   |
| 0.009000000000000001         | 0.267873709097601   | 0.984131192971179   |                     |                    |                   |   |
| TCGA-GV-A3QK-01B-11R-A23N-07 | 0.0135967043427012  | 0.0153803931163482  | 0                   |                    |                   |   |
| 0.198712483353986            | 0                   | 0.0679885849737908  | 0.124194826030695   |                    |                   |   |
| 0.112519885854326            | 0.030528818436536   | 0                   | 0                   | 0.011971322320734  | 0                 |   |
| 0.095814344267091            | 0.0134961202006079  | 0.0688275053132597  |                     |                    |                   |   |
| 0.0226401882079084           | 0.179810642810525   | 0.0445181807714907  | 0                   | 0                  | 0                 |   |
| 0.325                        | 0.0385613768444099  | 1.07554071378142    |                     |                    |                   |   |
| TCGA-GU-A764-01A-11R-A352-07 | 0.00183944149926074 | 0.0118023119619436  |                     |                    |                   |   |
| 0.0655504501160404           | 0.0760245853870451  | 0                   | 0.145478361560879   |                    |                   |   |
| 0.105941414585204            | 0.0351567050126197  | 0                   | 0                   | 0                  | 0.082692888082051 |   |
| 0.051596533164339            | 0.0837064171892502  | 0.146239982600055   |                     |                    |                   |   |
| 0.114294669164614            | 0.0360382636489627  | 0                   | 0.0436379760277344  | 0                  | 0                 | 0 |
| 0.085                        | 0.124110880134376   | 1.03614473980352    |                     |                    |                   |   |
| TCGA-GU-A42R-01A-11R-A23N-07 | 0                   | 0.0125718954907094  | 0.0220202669236585  |                    |                   |   |
| 0.208856966147893            | 0                   | 0.00622706678644599 | 0                   | 0.0316520659966964 | 0                 | 0 |
| 0                            | 0.0976032335350997  | 0.0618961146693304  | 0.0307088191680695  |                    |                   |   |
| 0.00269394713126835          | 0.147440572263156   | 0.0122649353905649  |                     |                    |                   |   |
| 0.169517586759884            | 0.177870953749066   | 0                   | 0.0186755759881582  | 0                  | 0.811             |   |
| -0.0175191563342318          | 1.08744744477793    |                     |                     |                    |                   |   |
| TCGA-DK-A6B6-01A-11R-A30C-07 | 0.0577182375115701  | 0                   | 0.115805752767506   |                    |                   |   |
| 0.0388142157648666           | 0                   | 0.0476185450854563  | 0.106545560790573   |                    |                   |   |
| 0.0735259843596358           | 0.0962491513720483  | 0.166067277598212   |                     |                    |                   |   |
| 0.0123452519376177           | 0                   | 0                   | 0.0355461319602463  | 0.0586575416907263 |                   |   |

0.0615960191146867 0.00909561850304266 0.0658369604755857  
0.0534780516104756 0 0 0.00109969945775081 0.00600000000000001  
0.300545684054179 0.962751894818796  
TCGA-R3-A69X-01A-22R-A30C-07 0.118462997017569 0 0 0.10515900273275  
0 0.253276556238673 0.00371023469616977 0.0330396886038533  
0.0212768169923944 0 0 0.0277915527782858 0.0663800508841829 0  
0.0477352590646898 0.191647461820679 0.0791250006579416 0  
0.0507812969102815 0 0 0.00161408160253029 0.02 0.216295227124502  
0.993965003663696  
TCGA-5N-A9KM-01A-11R-A42T-07 0.0320812957914823 0 0.0512787414656062  
0.304357086898024 0 0.140488403283243 0.0448230790750967  
0.00447565702029136 0 0 0.0316104869610717 0.0870532983141656 0  
0.0457130790516808 0.184291660755065 0.0106752178905436  
0.00564484382177184 0.0575071496719588 0 0 0.02 0.216674712129586  
0.999025139290282  
TCGA-FD-A6TF-01A-52R-A32O-07 0.169410004432717 0 0 0.134419194822818  
0 0.0977020528006073 0 0.0289318887955914 0.00777678984833729 0 0  
0.0197937172158061 0.0175106250033378 0.0893140237358631  
0.0439495547772149 0.237505423339458 0.0108152498821535 0  
0.142871475346096 0 0 0.00900000000000001 0.266095985970367  
0.972402996359766  
TCGA-XF-AAMR-01A-31R-A42T-07 0.0222397448623321 0 0.00161887745642671  
0.0185205034571419 0 0.20856392358993 0 0 0.00617306315537673 0  
0 0.0520891274064426 0.00975236429180345 0 0.00262028334930107  
0.349530323207813 0.130892937389708 0.0032603204086183  
0.176594163670293 0 0.00142932400795558 0.016715043746857 0.039  
0.177708263608295 1.01022043097516  
TCGA-XF-A8HF-01A-11R-A36F-07 0.0426830750930816 0.00682974263351278  
0.00229004570637092 0.120123334356596 0 0.128368689410817  
0.00149339667502385 0 0.0573118537358767 0 0.0458633489657754 0  
0.0268929359916587 0.00842147986100501 0.0990213426519213  
0.336170389580678 0.00946344440044274 0.0222196312510841 0  
0.0709664089668826 0.0188202770281036 0.00306060369116928 0.088  
0.12254799822696 1.03700912980929  
TCGA-ZF-AA4U-01A-11R-A38B-07 0 0.0033280706357282 0 0.133581585320525  
0 0.0938748064512492 0.0512109434651284 0.111861439165397  
0.0273664822415307 0.00274118893316429 0 0 0.0544795820285916 0  
0.166738636472744 0.0981866694654954 0.182030146799564  
0.0141275698277758 0.0588161148228708 0 0.00165676437023576 0 0.491  
0.0164743910491768 1.08426617781169  
TCGA-DK-A3IQ-01A-31R-A32Y-07 0.0455725633073349 0 0.00517562665402284  
0.0178819665895008 0 0.318943812220295 0 0 0 0  
0.0186319796658049 0.00587487178084963 0.0221468045475721  
0.150502005194665 0 0.271712675666635 0 0.013980734312047

0.129576960061273 0 0 0 0.08 0.126597183196584 1.0340669221909  
 TCGA-E7-A4XJ-01A-11R-A26T-07 0 0.128709265866293 0.0780597417536753  
 0.0470335958081245 0 0.0670714212656498 0 0.0252850410570389  
 0.0966600599958468 0 0 0.0568165132989711 0.0213241957712403 0 0  
 0.151877276106328 0.17463865931568 0.105110045595717  
 0.0235406849069105 0.0238734992585245 0 0 0.616  
 0.00179060968749018 1.07418818973159  
 TCGA-XF-A9T6-01A-11R-A42T-07 0 0.00174783367802747 0.000519820719049411  
 0.146115537816407 0 0 0.066450512711825 0.0365935095813117  
 0.0165529001687864 0 0 0.0467963738415719 0 0.13138344100725  
 0.0433200389924573 0.245014342032128 0.0945011904599345  
 0.130517763721066 0.0361591031158584 0 0 0.0043276321543267 0.075  
 0.134104770437004 1.03353432681014  
 TCGA-4Z-AA7M-01A-11R-A39I-07 0.0685437215245769 0 0.0174597564367415  
 0.0991017821343319 0.101905172014006 0 0 0 0.0273314377798319 0  
 0.0707254429139865 0 0 0.377052222305156 0.0757418710217582  
 0.136185065630882 0.0212014582720245 0 0 0.00475206996670468 0 0  
 0.073 0.135042606071249 1.05276158132762  
 TCGA-ZF-AA56-01A-31R-A39I-07 0.0603744706510284 0.0453468792563601  
 0.0642576878160042 0.0643642934855118 0 0.214819914823033  
 0.00315554230493931 0.0401700275149797 0.0102108482340096 0  
 0.0183593097409263 0 0.0389969866688419 0 0.0342248360404173  
 0.195917290277412 0.0318183204689809 0.0741865941297632  
 0.0322368541218532 0.0191875233327566 0.00153397001567929  
 0.050838651117504 0.007000000000000001 0.297830229272014  
 0.958156233134331  
 TCGA-XF-A8HH-01A-11R-A38B-07 0.062907348531618 0 0.00858074205554028  
 0.0523035784757566 0 0.0611369691952931 0 0.0515744913068937  
 0.0638239452783269 0 0 0.0136754020369054 0.00602447868971975  
 0.222137390002912 0.112739406730976 0.182740432215925  
 0.0579477285913457 0 0.101450355419651 0 0.00295773146913699 0  
 0.18 0.07577838670292 1.05691844991376  
 TCGA-C4-A0EZ-01A-21R-A24X-07 0.00300470325076792 0.0140371431375049  
 0.0310366142118034 0.105392742988325 0 0.165341624292435 0  
 0.0749411476614618 0.0309514923940337 0 0.0923778236413877 0  
 0.0287262223378279 0.327376286751431 0.0243317732056246  
 0.0539426624068515 0.0180310692264946 0.000990917526253938  
 0.0295177769677985 0 0 0 0.52 0.0121617328140329 1.09742475271305  
 TCGA-FD-A62P-01A-32R-A30C-07 0.0157074055526101 0.00968116895129312 0  
 0.183871518595773 0 0 0.129720433398125 0.0276512394934949  
 0.00423583730849243 0 0.0212299234807121 0 0 0.327381015888073  
 0.0632894310841222 0.153766514128843 0.010322359448269 0  
 0.041012171020992 0 0 0.0121309816492007 0.001 0.412409106120456  
 0.911811973549055

TCGA-CF-A47V-01A-11R-A23W-07 0.00735658611937163 0.020996685788213  
0.0111888707645932 0.303215615454687 0 0.0131090274930749  
0.0317840429883018 0.0497954011188366 0.0212379156209014 0 0  
0.0269851907207004 0.0358504723129341 0 0.04508468197639  
0.103633631512522 0.16125011062442 0.0852205955108533  
0.0832911719941999 0 0 0 0.315 0.0405659207272405  
1.06443515384129

TCGA-XF-A9SI-01A-11R-A39I-07 0.0829259030596642 0 0.0255054960287308  
0.243642573828474 0 0.200759281573043 0.117514459527578  
0.0400526697725562 0.0296900087520261 0 0.0150622015051571 0  
0.00599704279344995 0.0416027011810311 0.112687641349682  
0.0585516455002284 0 0.00157641131642617 0.0226423600210583 0 0  
0.00178960379089539 0.05800000000000001 0.150110376483196  
1.04322395506186

TCGA-GU-A42Q-01A-11R-A23W-07 0 0.0245648666542446  
0.00632573400522842 0.0754212654648779 0 0.108032405789867 0  
0.00992323786187078 0 0 0.0729514741187105 0.00368397168986439 0  
0.555946142117949 0.044683337351281 0 0.0866734367544224 0 0  
0.00155710734885171 0.0102370208428323 0 0.04 0.176264547131413  
1.0621869402125

TCGA-BT-A42F-01A-11R-A23W-07 0.121624055594178 0 0.066251252132676  
0.151612103031598 0 0.0328392323765572 0.0754941661122007  
0.054721297371304 0.0146023965065223 0 0.0164858750995448  
0.0158961626422196 0 0.19953214757088 0.0457900776205757  
0.0934162733597532 0.00116348463557641 0.00416816643798615 0  
0.0963500243371928 0 0.010053285171236 0.006000000000000001  
0.31382859877998 0.95546985161045

TCGA-ZF-A9RF-01A-11R-A38B-07 0.0442417114472998 0 0.0120732865909377  
0.419350516886372 0 0.016002537750015 0.0813029512742301  
0.0455142907902503 0.00786942868741242 0 0 0.0222648762007476  
0.0106156689430022 0.0232870172822219 0.0752082305788006  
0.222194359850857 0 0 0 0.0200751237178535 0 0  
0.007000000000000001 0.286492534090336 0.976510310453281

TCGA-KQ-A41N-01A-11R-A33J-07 0 0.14566586761128 0.0407387423096138  
0.0607289444765281 0 0.105621340656407 0 0.0524550602140212  
0.016550273073392 0 0.0423488046643834 0 0.00786936417783416  
0.132492351709356 0 0.156268545101386 0.0302063283744862  
0.132597231689864 0.0564474181325177 0.0200097278089297 0 0 0.587  
0.00578387588248575 1.07144444414924

TCGA-GD-A3OQ-01A-32R-A220-07 0.0601134337260243 0  
0.00752956924101878 0.0639086775475019 0 0.0544098127349446  
0.0577909840859784 0.0979820649436131 0 0 0 0.0435446051717546  
0.00490949349542242 0.122449337104909 0.0643855591151327  
0.110121123553602 0.0321747497011834 0.128189768104928 0

|                                                                      |                      |                     |                          |
|----------------------------------------------------------------------|----------------------|---------------------|--------------------------|
| 0.0923772980289223                                                   | 0.0356434461422961   | 0.0244700773027679  | 0.25                     |
| 0.05331590857423                                                     | 1.06155594331323     |                     |                          |
| TCGA-BT-A20U-01A-11R-A14Y-07 0 0.0125890949032657 0.0114669472570751 |                      |                     |                          |
| 0.088525555127249                                                    | 0                    | 0.104705200004398   | 0.019240290092413        |
| 0.0880822807506585                                                   | 0.0237426292928669   | 0                   | 0.0288638485938165 0 0   |
| 0.265653941368576                                                    | 0.0787271417951455   | 0.190440123862965   |                          |
| 0.0296048830895389                                                   | 0.011941949675564    | 0.0353178737575208  | 0 0                      |
| 0.0110982400434706                                                   | 0.099                | 0.109889782562313   | 1.04997012942505         |
| TCGA-XF-A9SW-01A-11R-A42T-07 0.0744708349770409 0 0.0246632070393389 |                      |                     |                          |
| 0.0471818573332564                                                   | 0                    | 0.132213902391867   | 0 0.010921794537093      |
| 0.0152362688433199                                                   | 0 0                  | 0.0366997971163356  | 0.0213319673919158 0     |
| 0.00713795911603237                                                  | 0.392899599311254    | 0.0100502584886727  |                          |
| 0.0852028539358488                                                   | 0.129017657937984    | 0 0                 | 0.0129720415800398 0.034 |
| 0.183432704583206                                                    | 1.00530074741319     |                     |                          |
| TCGA-FD-A3B3-01A-12R-A206-07 0.047931579183059 0 0.117246210014488   |                      |                     |                          |
| 0.141683357877414                                                    | 0                    | 0.113297337822247   | 0.0778833027342085       |
| 0.0688666680318992                                                   | 0 0                  | 0.0182617900958325  | 0.0229410929531859 0     |
| 0.104645001965416                                                    | 0.127863199264196    | 0.0913858529319515  |                          |
| 0.0104197850709076                                                   | 0.00485882168698233  | 0.0461027457861444  | 0 0                      |
| 0.006613254582069                                                    | 0.008000000000000001 | 0.279695438279191   |                          |
| 0.971729613088184                                                    |                      |                     |                          |
| TCGA-ZF-A9RC-01A-11R-A38B-07 0.0518325489925538 0.0172097466515485   |                      |                     |                          |
| 0.0142193787955266                                                   | 0.0594583182486734   | 0.00700703560457055 |                          |
| 0.010533802885288                                                    | 0.0741214248287895   | 0.00613051860694672 | 0 0                      |
| 0.0228187795381272                                                   | 0 0                  | 0.308011121265027   | 0.0445514782681671       |
| 0.159231873131732                                                    | 0                    | 0.021289666686383   | 0.173836512759242 0 0    |
| 0.0297477937374253                                                   | 0.113                | 0.102667958567794   | 1.05100207368416         |
| TCGA-E7-A6MD-01A-41R-A352-07 0.193542228805424 0 0.0353971795084681  |                      |                     |                          |
| 0.0989954102586061                                                   | 0                    | 0.270565101284655   | 0.0135295477619337       |
| 0.0357974264691081                                                   | 0.0405933033480082   | 0 0                 | 0.00286562750799557      |
| 0.0117063106815425                                                   | 0.0421094873923884   | 0.0467161730938392  |                          |
| 0.109275569824134                                                    | 0.0393360839069519   | 0.015850043463918   |                          |
| 0.0437205066930277                                                   | 0 0 0                | 0.002               | 0.366891754645319        |
| 0.932588128273122                                                    |                      |                     |                          |
| TCGA-E5-A4TZ-01A-11R-A31N-07 0.115686910975564 0 0.0120847358709167  |                      |                     |                          |
| 0.060918080311484                                                    | 0 0 0                | 0.113335439422196   | 0.00637372015769519 0    |
| 0.0264373541193579                                                   | 0 0                  | 0.4234262705993     | 0 0.0900441147404159 0   |
| 0.101258305719728                                                    | 0.0400837935561748   | 0 0                 | 0.0103512745271667 0.092 |
| 0.117143021841954                                                    | 1.06321670743144     |                     |                          |
| TCGA-ZF-A9R4-01A-11R-A38B-07 0.0103622038386706 0.00545182924595608  |                      |                     |                          |
| 0.00429595319598099                                                  | 0.15658033878047     | 0                   | 0.115817863710958        |
| 0.145038838207606                                                    | 0.0669840594685332   | 0                   | 0.0351939755332422       |
| 0.0068175248668355                                                   | 0.0716334738215571   | 0                   | 0.0337638169271008       |
| 0.102761232444508                                                    | 0.151374922026233    | 0.0204102173188227  |                          |

0.00355945320644641 0.0699542974070802 0 0 0 0.183  
0.0733683630598175 1.06442298665072  
TCGA-GV-A3QH-01A-11R-A220-070 0.0703826661611657 0 0.0923519305571021  
0 0.0732139341782893 0 0.0430926344912474 0 0 0.0380428737478429  
0.00387797852588223 0.0586638598244743 0.174314279470421  
0.0123271627367657 0.0939428290994841 0 0.339789851207325 0 0 0  
0 0.913 -0.0256253539553341 1.12385594638652  
TCGA-BT-A0YX-01A-11R-A10U-07 0.0260336532538001 0 0.0023094259276814  
0.209227498700948 0 0.189182108872239 0.09233301146504  
0.0674829935368836 0 0 0.0423551090092259 0.0210761454966616  
0.0163523200209291 0.0680039173394561 0.109065118062013  
0.0353283203957652 0.0354881258699288 0.0633765524260467 0 0  
0.0223856996233814 0.117 0.101865092468168 1.05088180221819  
TCGA-FT-A3EE-01A-11R-A206-07 0.134099208511083 0.0740693246091337 0  
0.0604520561063425 0 0.0723590824912061 0.00846360576072274  
0.0553707869540927 0.00576109230905995 0 0 0 0.000131622519144196  
0.0283304258950404 0 0.139164158374755 0.081035429653376  
0.23497258867 0.0666460862701526 0 0 0.0391445318758909 0.01  
0.247324056753708 0.982501519741543  
TCGA-ZF-A9RL-01A-11R-A38B-07 0 0.0361806230898982 0.0133482008008876  
0.264730839293621 0.176550687753564 0 0 0.0241284750902131 0 0  
0 0.0330159522639798 0.00173707241366554 0 0.0733886613300779  
0.0442242145748333 0.289874294122713 0.0428209792665465 0 0 0 0  
0.498 0.0148709204347542 1.09449872030642  
TCGA-ZF-A9R9-01A-11R-A38B-07 0.120530934056474 0 0.0824654367607793  
0.068807261654992 0 0.188853823077179 0.00532980826904063 0  
0.060836912258179 0.00393234857313528 0 0.0172343537171443  
0.00890094499509866 0.12584576421467 0.107278624517608  
0.161374068817329 0.00772293304324358 0 0.0330983683741215  
0.00549322445365217 0 0.00229519321735408 0.008000000000000001  
0.272150821102644 0.974120312198069  
TCGA-ZF-A9RE-01A-11R-A38B-07 0 0.0791669598261818 0.000374283434408326  
0.153042784542035 0 0.048762824079616 0.000738553969309312  
0.0782923561966989 0 0 0.00327216828412577 0 0.0252693163046806  
0.0744265428927394 0 0.0283436667827316 0 0.230691270656144 0  
0.14330085362725 0 0.134318419404079 0.186 0.0722438555681358  
1.06565545929404  
TCGA-DK-A6B1-01A-12R-A30C-07 0 0 0.000324617463155279  
0.125129521358232 0 0.269811536660703 0 0.00263113501069095  
0.0381145567327475 0 0 0 0.111205067203462 0.0978441588313964 0  
0.070233402620604 0.0188968752156587 0.150136305105363  
0.109090955823503 0 0.00658186797448385 0 0.758 -  
0.0133044302370913 1.08852321287692  
TCGA-CF-A5U8-01A-11R-A28M-07 0.0701577188633161 0 0.154678596833972

|                              |                     |                     |                     |                    |                      |
|------------------------------|---------------------|---------------------|---------------------|--------------------|----------------------|
| 0.341165314171519            | 0                   | 0.0246251408467047  | 0                   | 0                  | 0.000825931509250583 |
| 0                            | 0                   | 0.0924370312145227  | 0                   | 0.0572960000691329 | 0.031229701874464    |
| 0.0771666335840229           | 0.031044180758486   | 0.0154247381116489  |                     |                    |                      |
| 0.0429258785570852           | 0                   | 0                   | 0.0610231336058758  | 0.432              | 0.0233746411256258   |
| 1.10026406409179             |                     |                     |                     |                    |                      |
| TCGA-XF-AAMW-01A-11R-A42T-07 | 0.00606503774050054 | 0.00683206193798897 |                     |                    |                      |
| 0.00323298907612101          | 0.00801269717343052 | 0                   | 0.228256346153868   |                    |                      |
| 0.0403627665784117           | 0.0180476274823576  | 0.0154098650746147  | 0                   |                    |                      |
| 0.0137931417605766           | 0                   | 0.0106009638986835  | 0.156653983052218   |                    |                      |
| 0.116962087961085            | 0.17196781787824    | 0.112490729612647   |                     |                    |                      |
| 0.0507871593926042           | 0.0178031891064877  | 0                   | 0.00798630505121975 |                    |                      |
| 0.0147352310689453           | 0.078               | 0.129784956631477   | 1.03653221599       |                    |                      |
| TCGA-BT-A3PJ-01A-21R-A220-07 | 0                   | 0                   | 0.00302753365367569 | 0.101964588552273  |                      |
| 0                            | 0.170478110354753   | 0.0878655325703382  | 0.0586699353056396  |                    |                      |
| 0.0218734206263679           | 0                   | 0.0419030067147062  | 0.0207459612220135  | 0                  |                      |
| 0.130880665745765            | 0.159859476691534   | 0.130126216017201   |                     |                    |                      |
| 0.00586052186413753          | 0.00315412073488382 | 0                   | 0.0597613629433638  | 0                  |                      |
| 0.00382954700334765          | 0.01                | 0.251840074730535   | 0.991280265200112   |                    |                      |
| TCGA-ZF-A9R7-01A-11R-A38B-07 | 0.0559871877167392  | 0                   | 0.0108354182446695  |                    |                      |
| 0.412794662220841            | 0                   | 0.0236404940478176  | 0.0972349358883105  |                    |                      |
| 0.131909593837548            | 0.0211443445491942  | 0                   | 0                   | 0.058146741973397  |                      |
| 0.0130080379447273           | 0.0191745696784286  | 0.072444213880831   |                     |                    |                      |
| 0.0339528290375397           | 0.00948550849322134 | 0                   | 0.0402414624867346  | 0                  | 0                    |
| 0.016                        | 0.234382551092817   | 1.01877346225433    |                     |                    |                      |
| TCGA-FD-A3SO-01A-11R-A22U-07 | 0.0125868774122404  | 0                   | 0                   | 0.0663145731215792 |                      |
| 0                            | 0.150107560882271   | 0.0552123750968776  | 0.042084588626759   |                    |                      |
| 0.0173336872508821           | 0                   | 0.0332300618824084  | 0.00781183379382808 |                    |                      |
| 0.0723175265937837           | 0.149427489128918   | 0.161892677995869   |                     |                    |                      |
| 0.148307650925245            | 0.0106593936414701  | 0                   | 0.0588439107360073  | 0                  | 0                    |
| 0.0138697929118607           | 0.182               | 0.0741583386430002  | 1.06068677840634    |                    |                      |
| TCGA-E7-A97P-01A-11R-A38B-07 | 0.015088585842809   | 0                   | 0.00742863515333915 |                    |                      |
| 0.345695489158097            | 0                   | 0.0141450391452071  | 0.178292118477199   |                    |                      |
| 0.0719491221430862           | 0                   | 0                   | 0.0626343213437947  | 0.0273843262100585 | 0                    |
| 0.0276009187404442           | 0.132559260258471   | 0.0447628598999519  |                     |                    |                      |
| 0.0213205314531241           | 0.011104985780138   | 0.0400338063942803  | 0                   | 0                  | 0                    |
| 0.00700000000000001          | 0.299725810624909   | 0.977324655110583   |                     |                    |                      |
| TCGA-GU-A767-01A-11R-A32O-07 | 0.0278844539557779  | 0.0188338562382144  |                     |                    |                      |
| 0.0228369727007982           | 0.0666315529293246  | 0                   | 0.17944819752467    | 0                  |                      |
| 0.00270377852784214          | 0.0126494048456097  | 0                   | 0                   | 0.102580943367297  |                      |
| 0.126356379367956            | 0                   | 0.0069356882692485  | 0.15529014317047    | 0                  |                      |
| 0.0803970680954158           | 0.197451561007375   | 0                   | 0                   | 0                  | 0.417                |
| 0.0254549541189306           | 1.06479001997511    |                     |                     |                    |                      |
| TCGA-4Z-AA81-01A-11R-A39I-07 | 0.0698091819477797  | 0                   | 0.00969886468358162 |                    |                      |
| 0.329647404446366            | 0                   | 0                   | 0.173022743326105   | 0.086915028243876  | 0                    |
|                              |                     |                     |                     |                    | 0                    |

0.0053526058596114 0.0471866799864153 0.00671977980823695 0  
 0.00214121614596473 0.0777019327330279 0 0.146808369328537  
 0.0449961934904985 0 0 0 0.028 0.194727652252807  
 1.01794462801714  
 TCGA-2F-A9KQ-01A-11R-A38B-07 0.0121713079505105 0 0 0.0940421937780537  
 0 0.184665645578625 0 0.0252665043417402 0 0 0  
 0.034969107080993 0.101514129821747 0.0109356532433011 0  
 0.142641369910736 0.0581063579006541 0.2091860997355 0.117030490879465  
 0 0 0.00947113977867387 0.884 -0.0229835286145535 1.08566052483913  
 TCGA-SY-A9G0-01A-12R-A38B-07 0.361944695894241 0 0.122009768442446  
 0.0483326995265074 0 0.101396486003332 0 0.0154151720140231  
 0.017013503423235 0 0 0.0322077546952751 0.000808069406157021  
 0.0366548196803077 0.00886159504261473 0.0882356251049905  
 0.0218767078294705 0.0193154531022614 0.125927649835139 0 0 0  
 0.001 0.512858924516022 0.858269364077328  
 TCGA-GV-A40G-01A-11R-A23N-07 0.00722639157669276 0 0.00905414001966797  
 0.0727711112624766 0 0.313244491324418 0 0.0749614955857758 0 0  
 0 0.108972082626221 0.0732471778307394 0.142831272242074 0  
 0.0112403448065928 0 0.0322975906853779 0.11681171523154 0 0  
 0.0373421868084235 0.544 0.00913628583759365 1.09426883410761  
 TCGA-FD-A43Y-01A-21R-A26T-07 0 0.000940895782338825  
 0.00266444811954557 0.0932010605906526 0 0.0665468758447833  
 0.043022524159891 0.0584064347670343 0.0142646380247959 0  
 0.0144086271492968 0.0359938183016165 0.0222147852639567  
 0.169404380170572 0.154530532112581 0.126006556888283  
 0.111428127585919 0.0177516186599797 0.0692146765787543 0 0 0  
 0.016 0.233000118508828 0.993590863282044  
 TCGA-S5-AA26-01A-11R-A38B-07 0 0.0936558349025282 0.00511488064452972  
 0.0140695244872902 0 0.16178252715326 0 0.0576375964097662  
 0.000959346305388458 0 0 0.113713893527906 0.000203438004115936  
 0.0101613271908412 0.00243777664293423 0.348007877002462  
 0.0748938102561141 0.0327030908084484 0.0625961921533259 0  
 0.0220628845110891 0 0.918 -0.0261777449453058 1.0894555041456  
 TCGA-BT-A42E-01A-11R-A23W-07 0 0 0.000981845305259755  
 0.146312495239997 0 0.0881607250133265 0.0882857641740089  
 0.101168525160354 0.0270329897767394 0 0 0.0741701241145155 0  
 0.101865684907131 0.135518948557033 0.130258182629622  
 0.0802979385945192 0.0187982358784293 0 0.00714854064906407 0 0  
 0.013 0.239745144005041 0.99526640414524  
 TCGA-FD-A43X-01A-11R-A23W-07 0 0.0669579347540415 0.0805522427819781  
 0.144334509637632 0 0.111217159286261 0 0.0599036940247682  
 0.0126296805354488 0 0.0586458334621698 0.0168211920991423  
 0.0299112065761399 0.125122325285502 0.00835683206192923  
 0.186383513890069 0 0.0135367165700025 0.0856271590349162 0 0 0



0.613 0.00232984721014079 1.07739727501876  
 TCGA-ZF-AA4R-01A-11R-A38B-07 0 0.00489169119137966 0.0113199461327588  
 0.0914128023205124 0 0.0479237268367144 0 0.0778454800251935  
 0.0326538285013145 0 0 0.0436878829506553 0 0.426996861328644  
 0.128830665837245 0.0287960114593915 0 0.0656856326995526  
 0.039955470716639 0 0 0 0.026 0.196679398930135  
 1.03509002174728  
 TCGA-BT-A20T-01A-11R-A14Y-07 0 0.0114563211274339 0.00176026015299688  
 0.167271098843362 0 0.209320258630803 0.0429046407238938  
 0.0596811453917008 0.0339894834155805 0.011390723190335 0  
 0.0457604675664606 0 0.0641046409115296 0.0780455834885556  
 0.12172953386848 0.0740616996387651 0.0268023671655672  
 0.051721775884536 0 0 0 0.073 0.135590133378562  
 1.03738211837399  
 TCGA-E7-A7DU-01A-11R-A32O-07 0 0.0231091167040665 0.0124827644414083  
 0.0636029606786888 0 0.214641494800368 0 0.0260251978218936  
 0.0258306546952891 0 0 0.0477487837851013 0.013377825799083 0 0  
 0.266387053216941 0 0.209031923177474 0.0977622248796867 0 0 0  
 0.734 -0.0109853405780439 1.08700606622217  
 TCGA-DK-A3WY-01A-11R-A22U-07 0.328006076992583 0.123544837181621  
 0.0770181424683671 0.0926595263053487 0 0.0914299463872285  
 0.0242425005279959 0.0684652081962647 0.0472332695958276 0 0 0 0  
 0.0632744772544489 0.0424406721748534 0.0274417852753806 0 0  
 0.0142435576400803 0 0 0 0 0.5541301467033 0.832420082384616  
 TCGA-G2-A2EF-01A-12R-A18C-07 0.0262153659077732 0 0.00984337486100311  
 0.177286147122574 0 0.0611314114947085 0.253776919231877  
 0.00796289277588524 0 0 0.0743747734712879 0 0.00381023533902546  
 0.0584261207460595 0.12992704925739 0.122478924043635  
 0.0723777073528996 0 0.00238907839588219 0 0 0 0.021  
 0.213135479653348 1.00120525298813  
 TCGA-BT-A20V-01A-11R-A14Y-07 0 0.0280375324788369 0 0.13234531284404  
 0 0.136405411331552 0.121636175922828 0.0202462810468682  
 0.00206907369136876 0 0 0.096223092078911 0.0725363393202904  
 0.115189082391973 0.10243305025264 0.0082454118900865  
 0.0609589747510471 0.036067371114991 0.062303742759094 0  
 0.00530314812547302 0 0.0659999999999999 0.14154627120804  
 1.03022726672475  
 TCGA-K4-A3WV-01A-11R-A22U-07 0.0415383400676105 0.00845221591324395  
 0.0603017952801523 0 0.0166524181738833 0 0.101224942160796 0 0  
 0 0.0174850150209982 0 0.440719486224237 0.0844473220632843  
 0.0172499851233311 0 0.0670807973377074 0 0.136433315998817 0  
 0.00841436663593849 0.543 0.00933816652984847 1.13244947011902  
 TCGA-GU-AATQ-01A-11R-A39I-07 0 0.00941291974373621 0 0.0095213723263311  
 0 0.195548119193417 0 0.0652982708582484 0.0141455378511378 0 0

0.0509171587797644 0 0.272498363884358 0.187122991108244  
 0.122038399940373 0.0361272699966061 0 0.037369596317785 0 0 0  
 0.014 0.237060460594699 1.00580335283027  
 TCGA-G2-A3VY-01A-11R-A22U-07 0.00951794464991323 0.167058365237519  
 0.049071581896975 0.29141267808555 0 0.100504460935743 0 0 0  
 0 0.039535919075117 0 0.0301367467424492 0 0 0.0652225651156991  
 0 0.126114849769199 0 0.114279627394392 0.00714526109744273 0  
 0.049 0.16375588338684 1.02875130157959  
 TCGA-XF-AAN8-01A-11R-A42T-07 0.0471034069690091 0 0.0134764146081577  
 0.0643481654631143 0 0.0801414560855584 0.0533501440609684 0  
 0.00570380693145042 0 0 0.00795085458269626 0.0196418414149242  
 0.0362516083700341 0.0192254826540305 0.38422286913634 0  
 0.00883944056189642 0.130045508774818 0 0 0.129699000387002 0.002  
 0.374042377041912 0.927915261408329  
 TCGA-CU-A3QU-01A-11R-A22U-07 0 0.0411815407696527 0.0125845277180829  
 0 0 0.0849775107587241 0 0.0154956483237396 0.0141125496759276  
 0.00250907395583336 0.0618620645608922 0 0.0814360552216648  
 0.368617473814889 0 0.0633371559819007 0.0081677101620963  
 0.0760796229625197 0 0.119864597648607 0.0497744684454704 0 0.527  
 0.0115293966659843 1.10651075493327  
 TCGA-GD-A3OP-01A-21R-A220-07 0.113865007657705 0 0.00827573652081258  
 0.0961224965177494 0 0.187131830580342 0.0056834100617646  
 0.0694267270006539 0.000885394754958548 0 0 0.0455775991194987  
 0.00517241335464076 0 0.110426409796198 0.17172155511628  
 0.0485554210038858 0 0.13715599851551 0 0 0 0.372  
 0.0310982573408205 1.06831015563716  
 TCGA-KQ-A41P-01A-12R-A33J-07 0.109485398315528 0 0.00604030148093613  
 0.0467484163850116 0 0.0863307923390937 0 0.00886302751466248  
 0.0210524720199683 0 0 0.0351342941432291 0 0.408608307069725  
 0.046201504092548 0.155501564886883 0 0.0133007656753446  
 0.0627331560770692 0 0 0 0.001 0.475767080930746  
 0.879488807299803  
 TCGA-UY-A9PH-01A-11R-A38B-07 0.0170179601594497 0 0.0603685493733888  
 0.19026514623823 0 0.0584145565512485 0.128968517881642  
 0.0240699333966672 0 0 0 0.0643754517312833 0.0197645566836676  
 0.0175102281393734 0.102800390324982 0.191862406230035  
 0.020332123964554 0.0151475780799673 0.0832250669972605 0 0  
 0.00587753424825128 0.024 0.200377226311932 1.00072620004207  
 TCGA-FD-A5BY-01A-31R-A28M-07 0.0102679051975039 0 0.00105088110552312  
 0.0402673371336988 0 0.155765647343549 0 0.00968462636548803  
 0.0126052496694809 0.0207810436318621 0 0.0522923196238752 0  
 0.250275371383332 0.0599559144694456 0.136586492003656  
 0.0870460223447511 0.000246197171428213 0.152955460926716 0 0  
 0.0102195316296908 0.004 0.328512960240664 0.949459144602158

TCGA-K4-A3WU-01B-11R-A23N-07 0.2472477916529 0.00903313782420876  
0.034179302983399 0.0600943828888249 0 0.279582327614838  
0.0296410576128468 0 0.0333267869184048 0 0 0.0150337007210601 0  
0.143598228798391 0.00884319091103838 0.0646351359262315  
0.0155532102180346 0.0132390450882408 0.0402061378103231 0 0  
0.0057865630312589 0.002 0.3892071478471 0.923172241053484  
TCGA-FD-A3SJ-01A-12R-A22U-07 0.147890828833343 0 0.0198667098863846  
0.0282173170495127 0 0.126892760002442 0 0.0229087002385143  
0.0415506393199304 0 0.0230473924250433 0 0.00858598979883754  
0.14269107588292 0.100658190784903 0.145766685956905  
0.0627795673162976 0 0.129144142504968 0 0 0 0.039  
0.177367323663421 1.00762116477979  
TCGA-FD-A3B5-01A-11R-A20F-07 0 0 0.000985907902747607  
0.0608781860222994 0 0.216528127836356 0 0.0829411924366764 0 0  
0 0.00858384420970045 0 0.317019102014832 0.0512272116451399  
0.139634572197807 0 0.105445048852114 0 0.00623843310722866 0  
0.010518373775098 0.181 0.0751983366571232 1.07995855696276  
TCGA-GC-A6I3-01A-11R-A31N-07 0.0297852148837573 0 0.163441760096724  
0.205818507216286 0 0.0435437005856399 0.035909307548058  
0.0545689438678572 0.0432711067843588 0 0 0 0.000656474281520955  
0.161940179451281 0.0661369786051319 0.118635542428932  
0.00475377652868426 0.0359890160151307 0.0355494917066378 0 0 0  
0.006000000000000001 0.305373382458424 0.961586503729881  
TCGA-4Z-AA80-01A-11R-A39I-07 0.159146802637004 0 0.0860740965347625  
0.185939441497357 0 0 0.0204377117865861 0.0872701800178221  
0.0526728556046762 0 0.0528678631743773 0.00479239071258078 0  
0.0219371455443343 0.111197066688889 0.0959433118786274  
0.0178447560843473 0.0825824800089207 0.0122041521890478 0 0  
0.00908974564066719 0.018 0.223177377022173 1.00393549267051  
TCGA-G2-A3IE-01A-11R-A20F-07 0 0.104043938940034 0 0.112671185235688  
0 0.0905651857191425 0.00018185468545321 0.0183625210294412  
0.0154660592906514 0 0.0337757050683142 0 0.0162787069477985 0 0  
0.286308859304118 0 0.248604487120496 0 0.0549508506382862  
0.01695043390331 0.00184021211726758 0.0620000000000001  
0.146248130782698 1.02804220924969  
TCGA-ZF-A9R0-01A-11R-A38B-07 0.0208008693495458 0.0122894164237175  
0.00494530360142392 0.0992495018479295 0 0.0417372534440783  
0.0877797866289688 0.0504629630099433 0.0304841155267587 0  
0.0413094500483999 0 0 0.298396086491141 0.169569313383229  
0.0928811382099187 0.0279277240958946 0 0.0221670779390509 0 0 0  
0.521 0.0120482069286639 1.10408276876115  
TCGA-FD-A43S-01A-21R-A23W-07 0.107240717346205 0.067523201854426  
0.152231924563787 0.257775222487344 0 0.0139465432871759  
0.0230117051486761 0.0338293153978315 0.0829468641503352 0 0

0.0153075393627292 0.0151607741974868 0.0240009775010134  
 0.0123426949432113 0.140114736171677 0 0.0077196406541246  
 0.0449358133001113 0 0 0.00191232963386547 0.001 0.452269949074037  
 0.891854534723194  
 TCGA-XF-A8HG-01A-11R-A36F-07 0 0.0821067271690722 0 0.0495301757786578  
 0.00893019667322864 0.0403220761254332 0 0 0 0.0427964595260919  
 0 0.0566891634651112 0.0274452935729259 0.00252269367305229  
 0.314973930035303 0.234470354391503 0.0907686574581317  
 0.0440119821536976 0 0 0.00543228997779127 0.417 0.0254584938852177  
 1.07578710878139  
 TCGA-K4-A83P-01A-11R-A352-07 0.1784851546363 0.076698981911561  
 0.091341843791383 0.113008711324281 0 0.117557624813726  
 0.0386082436090834 0.0535862558615476 0.0350741274669887 0 0  
 0.0289362179974565 0.00401831779819567 0.0998693321137055  
 0.0647782031404498 0.0649722217384323 0.016025918873832 0 0  
 0.011618075351912 0 0.00542076957114481 0.001 0.469178810210674  
 0.882296979085098  
 TCGA-GD-A2C5-01A-12R-A180-07 0 0.011338666302063 0.0220420018261532  
 0.0197466709839499 0 0.211366426141325 0 0 0.0287982694704061 0  
 0.0174841560578382 0.00890989060450265 0.0190965784095687  
 0.0632876352634505 0.0343781779171795 0.173209245390388  
 0.116313678027931 0.0961715083548621 0.114261600862248 0  
 0.0433597627202229 0.0202357316679122 0.449 0.021019503604447  
 1.06007960890652  
 TCGA-XF-AAMX-01A-11R-A42T-07 0 0.0331961762330058 0.0279619908321771  
 0.0820869461473342 0 0.0600555566659141 0.0444561588750512  
 0.0976187593355221 0.0341678109157203 0 0 0 0.159211706724198  
 0.083063838820354 0.329214348446967 0 0 0.0489667070037565 0 0  
 0 0.108 0.10629952668236 1.04557561244924  
 TCGA-DK-A1AE-01A-11R-A13Y-07 0 0 0.00847929845631611 0.0578332745936931  
 0 0.241343037490523 0.0853101684653216 0.124097156903109 0 0  
 0.0563289726540424 0.0594289813393181 0.0114086975056661  
 0.0482480943988628 0.07411497496056 0.0340008502832766  
 0.10915083644804 0.0195329684251407 0.0707226880761308 0 0 0  
 0.129 0.0948868525614826 1.0541205836607  
 TCGA-FJ-A3ZE-01A-11R-A23N-07 0 0.140930171829901 0.0398081560037267  
 0.218236515080957 0 0.134100096777998 0 0 0.00385158672272714 0  
 0 0.0152128827001637 0 0.132528605298197 0 0.00422938052320141 0  
 0.141722130670204 0.159165710814516 0 0.00489936757657619  
 0.00531539600183309 0.978 -0.0401760377531169 1.10099245899296  
 TCGA-DK-A2I1-01A-11R-A180-07 0.0871409092987724 0 0.0765445109939239  
 0.148652919131163 0 0.0131960424039809 0.0274472569345475  
 0.00403564399089421 0.0681488568181337 0 0 0.0519082113581424  
 0.00645239520295658 0.112631930130426 0.139555725262431

0.138037187159762 0.0552548209156388 0 0.0694788140621549 0 0  
0.00151477633707213 0.01 0.249923503057524 0.982947086822528  
TCGA-DK-A6B0-01A-11R-A31N-07 0 0 0.000702122836965793  
0.0545644555769394 0 0.19819516171659 0 0.0248847418754196  
0.00454717616029685 0 0 0.0860647373584125 0.119942544949656  
0.0072833943929308 0.0180879342421781 0.353987187624968  
0.00402175544288325 0.0163459607128155 0.108649840318513 0  
0.00272298679143073 0 0.616 0.00169277859350709 1.08244512128822  
TCGA-FD-A5BR-01A-11R-A26T-07 0.160544796320959 0 0.127765426757026  
0.0980626214672746 0 0.144130791418672 0.0772128068010202  
0.0370660301569486 0.0850087820275803 0 0 0 0 0.101813699411065  
0.010758486118368 0.0836888061974334 0.0191548067670973  
0.0118484687966852 0.0339181988852183 0 0 0.00902627887465274 0.002  
0.36827016215691 0.933047196337424  
TCGA-KQ-A41Q-01A-11R-A33J-07 0 0.090356576470643 0.0158548881674383  
0.0706258665917344 0.13295176323265 0 0 0 0.0265484075701104 0  
0.0708645500355179 0 0.0219163690631694 0.159531637700854 0  
0.0430451210850173 0 0.214585074168639 0 0.128137012734011  
0.0255827331802145 0 0.152 0.0827495342121363 1.05599547146725  
TCGA-DK-A1AF-01A-11R-A13Y-07 0.0272438546522405 0 7.25536983170227e-05  
0.127782540941858 0 0.146099058625549 0.0463301777749251  
0.0300184324755236 0.00875194137268645 0 0 0.023609678580558  
0.00654780550962029 0.294527444614801 0.0879948203607392  
0.105637358598075 0.00962125689761906 0 0 0.0596619846527807  
0.00561946764943305 0.0204816235952735 0.04 0.176396506449071  
1.02518636710603  
TCGA-LT-A5Z6-01A-11R-A28M-07 0.198523219386558 0 0.118642329150974  
0.203390723181968 0 0.0244867980715207 0.0103164757307316  
0.0652295910414511 0.0318657778662042 0 0 0.0532644556214775 0  
0.13720301058973 0.0223989411854384 0.0875365485541674 0  
0.00221679619244698 0.0449253334273327 0 0 0 0.005  
0.321791939861731 0.958756235637802  
TCGA-GC-A4ZW-01A-11R-A26T-07 0.103990038541383 0 0.082413012518308  
0.147846895140326 0 0.0871064792272887 0.0873304227192971  
0.0731499873109978 0 0 0 0.0512258342091455 0 0.115102121010047  
0.0346414688467929 0.105785253267845 0.0314321824100786  
0.00713185105702018 0.0728444537414707 0 0 0 0.081  
0.126307826654051 1.03003775030917  
TCGA-K4-A4AB-01B-12R-A28M-07 0.00742419509477152 0.0337159606276679 0  
0.0368659713088256 0 0.279342011077756 0.0315570788954968  
0.0363763012718007 0.0143430301431879 0 0.00894713963629165  
0.030382463525717 0.00281371692123341 0.0223698275429606  
0.0116860785916102 0.169375683218309 0.143799920363565  
0.0936740413398964 0.058466768137791 0 0.0100609993812555

0.0087988129218642 0.092 0.11468662857572 1.0314946536434  
 TCGA-DK-AA74-01A-11R-A39I-07 0.020685725539581 0 0.00369758558459336  
 0.134552886454451 0 0.0482283338151196 0.0346823315943148  
 0.0702210400215459 0.0258480070281321 0 0 0.0328191046057502 0  
 0.110222275440245 0.152798311083357 0.229282454811646  
 0.0593352890381405 0 0.058301386117653 0 0 0.0193252688654699  
 0.001 0.448216142810057 0.893122140370972  
 TCGA-G2-A2EO-01A-11R-A180-07 0.0244427846548335 0 0.0306097644826706  
 0.236501241806341 0 0.0677258410587996 0.188672805994334  
 0.0258722169023354 0 0 0 0.0747221732770168 0.0156264573956511  
 0.0947080327801811 0.0468592191875529 0.0956528571292724  
 0.00682098147768272 0.00483806167159524 0.0869475621817331 0 0 0  
 0.07 0.137735247192702 1.03175910120687  
 TCGA-DK-A1AG-01A-11R-A13Y-07 0.0136186318573801 0 0.0134734310551139  
 0.0954889707185795 0 0.378960037192946 0.00844206165375943 0  
 0.0137794348383858 0.0508588668748689 0 0.0773575672370164  
 0.0285885661944606 0.053849582264492 0 0.0704713577203582  
 0.00884334724102975 0.0603281307829792 0.0319036199479704 0 0  
 0.09403639442066 0.212 0.0639866726342442 1.08048687222996  
 TCGA-GV-A3JZ-01A-11R-A21D-07 0.115707867235263 0 0.0506018130435264  
 0.0894075674269419 0 0.0856616208789598 0.0463669188631996  
 0.0286790909752186 0.01077828056015 0 0 0.024750124361672 0  
 0.197098808888937 0.0725197098777792 0.19599041248685  
 0.0627683986211184 0 0.0169129103736008 0 0 0.00275647640678376  
 0.014 0.236953745273579 0.987878169394803  
 TCGA-XF-A9SV-01A-21R-A42T-07 0.0418537757074063 0 0.0122309755374412  
 0.130290784937896 0 0 0.00435062092307954 0.0314415550161897  
 0.0207452353746197 0.0126596708291203 0 0.0118707906269426 0  
 0.470060504248398 0.0431439332377085 0.159907041354963 0 0  
 0.0614451122062356 0 0 0 0.12 0.0994683021095089 1.08731035974305  
 TCGA-UY-A78K-01A-11R-A33J-07 0.0942092560796199 0.0871515928865196  
 0.115860260593919 0.15119546192484 0 0.0862503970474441  
 0.0431469635108124 0.0428438947463524 0.0840987301226741 0  
 0.0206801992612736 0 0.00090530314665733 0.0824883461604419  
 0.0589607381313953 0.106158765381451 0.0124657294346739 0  
 0.0135843615719259 0 0 0 0.001 0.456423135780128  
 0.888939739837943  
 TCGA-FD-A6TH-01A-11R-A32O-07 0.137121641095432 0 0.00687706418077607  
 0.0395335936891959 0 0.128526974967673 0 0.0945030131897234 0  
 0.00192963272902223 0 0.0401916155622047 0 0.257430407565866  
 0.0984885809634826 0.165443183577931 0 0 0.0262951579376552 0 0  
 0.00365913454103735 0.007000000000000001 0.281702965362302  
 0.973153406203796  
 TCGA-DK-AA6W-01A-12R-A39I-07 0.00885947217327909 0.00217432663906866 0

0.049736792314345 0 0.124178510780952 0.000455548337659914 0  
 0.038277448317134 0 0 0.0283358774178207 0 0.134830619509625  
 0.08028236724862 0.130388492476559 0.386378636818705 0 0  
 0.00299407258402552 0.0131078353822069 0 0.01 0.254231942720585  
 0.988985263043365  
 TCGA-CF-A3MG-01A-11R-A20F-07 0.0419091227403121 0 0 0.083018170536238  
 0 0.268977542513643 0 0 0 0 0.00731951916609748  
 0.025949390404264 0.0455359608255914 0.0937190134094433 0  
 0.00872989490758278 0.112907742371528 0.0638469369768556  
 0.248086706148445 0 0 0 0.951 -0.0323626949059256  
 1.0916180218911  
 TCGA-DK-A3X1-01A-12R-A22U-07 0.0109949941416261 0 0.0347222001421827  
 0.092251655135621 0 0.126383702863676 0.0798987009247831  
 0.0208893791212885 0.0144116033496342 0 0.049610148081075 0 0  
 0.185804188297097 0.10124277104919 0.180220525533701  
 0.0206795828311928 0.0326388413907216 0 0.0502517071382114 0 0  
 0.179 0.0765782490676639 1.05701535988244  
 TCGA-DK-A1A6-01A-11R-A13Y-07 0 0 0.00119817266760093 0.309951227004348  
 0 0 0.119555482041633 0.0705329558476011 0.00517098097470729  
 0.000601488313429278 0.0114957560964011 0 0.000705962087066073 0  
 0 0.167401711356309 0 0.266153264600579 0 0.0341714467388633 0  
 0.0130615522714621 0.013 0.239478479171603 0.99755804266245  
 TCGA-XF-AAMG-01A-11R-A42T-07 0 0.105681015896671 0  
 0.00209521254390393 0 0.310281379150714 0 0 0.0139119177043433 0  
 0.0465805473986484 0 0.0487847657334957 0.0898665971998319  
 0.0301619962114717 0.280766103804125 0.00585404602580226  
 0.0179206617837989 0 0.0408986910489079 0 0.00719706549828633 0.123  
 0.0979824390422519 1.04296082097602  
 TCGA-E7-A541-01A-11R-A26T-07 0 0.00874396191334495 0.00702886663322309  
 0.390336918160219 0 0.0600336571754315 0.110763746714926  
 0.0346867459770732 0.0286272751671063 0 0.00439505680671435  
 0.0172959952741974 0.00750773818867544 0.0137507460305083  
 0.0511725471736782 0.0996892317531277 0.0950719474113314  
 0.0137677178611129 0.0374847243049072 0 0.013859774176135  
 0.00578334927828751 0.054 0.154478441034567 1.0363899400148  
 TCGA-XF-A8HE-01A-11R-A36F-07 0.0703393659764322 0 0.0272001968450791  
 0.205860821901383 0 0.112032028370466 0.0972040847180655  
 0.0645167938615209 0.00631670853174384 0 0.0363682677145243  
 0.0166590204072548 0 0.0614181756849936 0.108065123691498  
 0.0486849442625854 0.000253091671061009 0.0158162474366153  
 0.0448954146746913 0 0 0.0843697142520861 0.004 0.3298036527799  
 0.949941045441551  
 TCGA-DK-AA6Q-01A-11R-A39I-07 0 0 0 0.364376277595903 0 0  
 0.147652552408711 0.0818958250767007 0.0147236492691955 0

0.0330962399568951 0.00281605992416084 0.0269295448808852  
0.00633211513450307 0.121981389287129 0.0383552984495976  
0.0925027613338529 0 0.069338286682467 0 0 0 0.001  
0.445497767808178 0.895075919743814  
TCGA-UY-A78N-01A-12R-A33J-07 0.0256434858584567 0 0.0111527073721664  
0.234629703330982 0 0.0824573468442609 0 0.10988468620774  
0.0108696595716271 0 0 0 0.0795890684580227 0  
0.00120555623495605 0.140662256190391 0.145519599584695  
0.0704063651560516 0 0.00634513233128009 0.0733696580067459  
0.00826477485262439 0.269 0.0487367930010818 1.06157921737827  
TCGA-DK-AA75-01A-11R-A39I-07 0.036239494459172 0.0659463523045637  
0.0024372391833141 0.114029807249458 0 0.12343179896742  
0.00384158264202525 0.00467114655298522 0 0.0652028894145628 0  
0.00513861916864345 0.03213354661541 0.216514993260195  
0.0610999086839054 0 0.0596500889696051 0 0.185376862596678 0 0  
0.0242856699320625 0.752 -0.0128029548916783 1.08277081561603  
TCGA-ZF-AA5P-01A-11R-A39I-07 0.339730576975613 0 0.130831593552732  
0.0911906249276967 0 0.0678397675347733 0 0.0349934549171448 0 0  
0 0.0341159289852248 0.000357413470146726 0.00802368143484823  
0.131767420293155 0.0679218566810082 0 0.0408996595198289  
0.0467739328385918 0.00555408886923729 0 0 0.001 0.46724438444393  
0.889878593192511  
TCGA-GC-A3WC-01A-31R-A22U-07 0.0304981800748854 0.0352076411591586  
0.0186920370541212 0.153247943333066 0 0.0551629846588243  
0.134787452210284 0.045868074247734 0.0257856764622163 0  
0.0157404687226636 0 0 0.0979646167970223 0.137739540159327  
0.0994267486344674 0.101645589621575 0 0.047491610319511 0 0  
0.000741436545143547 0.013 0.239602339779822 0.984243000327912  
TCGA-K4-A4AC-01A-21R-A26T-07 0 0.00117105718168928 0.00372299074938368  
0.0662653577196265 0 0.211825935216086 0.0837408060952862 0 0 0  
0.0596488593779012 0 0 0.217850891590656 0.108166033789842  
0.230158871540629 0.0104133304447551 0 5.49997279096069e-06  
0.00557698840237154 0 0.00145337791898139 0.007000000000000001  
0.282590567643249 0.974582391320884  
TCGA-FD-A3SL-01A-21R-A22U-07 0.0594739567495805 0 0 0.0615866314041503  
0 0.107854245937546 0 0.0320007077992091 0 0 0  
0.0140738082607098 0 0.210298554986089 0.143632420745376  
0.226987897071315 0.0377649363820301 0 0.106326840663994 0 0 0  
0.023 0.210022711645478 1.00636923574873  
TCGA-K4-A5RH-01A-11R-A30C-07 0.00336041806819357 0 0.00065177568384047  
0.455073135670724 0 0 0.176800388518419 0.0222182120420812 0 0  
0.0211097136663114 0 0.0105726547433923 0.00283748940052396  
0.0841779871367476 0.212886455622616 0 0 0.0103117694471502 0 0  
0 0.003 0.347151940197146 0.948846899936617



TCGA-FD-A5C1-01A-11R-A28M-07 0.0135530367216392 0 0.0279529371027837  
0.178840458512686 0 0.0980961939670946 0.118174839214844  
0.0452542445598644 0 0 0.00721289920282522 0 0.0104166951921255  
0.0993435934194658 0.0914148285560138 0.183033647235489  
0.0169990934910749 0.0822732030604328 0.0204066061418193 0 0  
0.00702772362184196 0.014 0.238850125063535 0.986702429552899  
TCGA-BL-A13J-01A-11R-A277-07 0.0151477806602386 0 0.0177217554864054  
0.0527217181267573 0.0268685396977006 0.0758919131334837  
0.0318942702175826 0 0 0 0.0362781273136002 0 0  
0.285253520960208 0.0835961143307608 0.214267142480957 0  
0.0621149580024807 0.0486535083132468 0 0.0495906512765778 0 0.742  
-0.0118084365201026 1.10634016954082  
TCGA-XF-AAN7-01A-11R-A42T-07 0.0598855235054323 0 0.0089996655067708  
0.07615277784047 0 0.264280300455734 0.0313740186737895  
0.018331921691293 0 0 0 0.0307060553261284 0.0102098010202324  
0.147391535013019 0.0781996196897572 0.211185451940239 0 0  
0.063283329337135 0 0 0 0.111 0.104039265359765  
1.04252565517048  
TCGA-2F-A9KO-01A-11R-A38B-07 0.0886103210383544 0 0.0277664656432932  
0.231473838303256 0 0.162239400896409 0.0790896627922393  
0.0541408757329817 0.00876779193753011 0 0 0.0500904572234571 0  
0.0366511794825546 0.0712604955574296 0.0950490814075375  
0.0265573315210901 0.0128450952683994 0.0554580031954685 0 0 0  
0.02 0.218401231278178 1.0023370781563  
TCGA-DK-A3IM-01A-11R-A20F-07 0 0.00549914784433122 0 0.06537061322541  
0 0.0938279984611342 0 0.0834810958006167 0 0 0 0 0  
0.587051464339163 0.0512564897337823 0.0369746787183865 0  
0.0110731982175946 0 0.0444963812865442 0 0.0209689323730368  
0.009000000000000001 0.26164820664828 1.02528107325229  
TCGA-FD-A3SS-01A-12R-A22U-07 0.0710397353817644 0 0.0207503775793619  
0.0328842893576862 0 0.161393777232844 0 0.0441631952280776 0 0  
0.0526917001480591 0 0 0.140993129664676 0.0689092046959887  
0.184699908417301 0 0.173237433239959 0 0.00924615401919671  
0.0399910950350855 0 0.054 0.15559418307181 1.02585999334866  
TCGA-4Z-AA7N-01A-11R-A39I-07 0.287502462288083 0.103572957841695  
0.0132106488536323 0.0688980599527966 0 0.139225758173428  
0.0299744926772078 0.090020437316485 0.0730463744328025 0 0 0 0  
0.106015902316802 0.0215213813773542 0.0349426841671254  
0.0094352130854934 0.0101030576216506 0.0125305698954442 0 0 0  
0.001 0.527689915527628 0.848660417525967  
TCGA-HQ-A2OE-01A-11R-A206-07 0.056189089907513 0 0.0674568779547452  
0.128526528152822 0 0.0738890616527057 0.0449033355262208  
0.0274412376673265 0.0660797310193025 0 0.041921396665283 0  
0.0186273466079445 0 0.0237830835235215 0.137507868475446

0.141982575922404 0.113807888152108 0 0.0380168381866002  
 0.00707735912604824 0.0127897814600095 0.0600000000000001  
 0.148014769831717 1.01647031204465  
 TCGA-UY-A8OC-01A-11R-A36F-07 0 0.00935478648084123 0.048336340800824  
 0.0311693096450483 0 0.0144627488063646 0 0.0738034235722235  
 0.0209564067642036 0 0 0.0105807059777927 0 0.586055446368855  
 0.020082147732611 0.130606450886814 0.0493909010854674 0  
 0.00249850677971365 0 0.00270282509924077 0 0.001 0.514888177496883  
 0.864257930681193  
 TCGA-GV-A3JV-01A-11R-A220-07 0.142810791727047 0 0.108475304213524  
 0.177632099196776 0 0.116824740843819 0.077129420646037  
 0.0564101382822776 0.041606467752932 0.0102261110961149 0  
 0.00566752212334096 0 0.042740272943147 0.0721572427412554  
 0.0699579021567897 0.038014883143268 0 0.0403471031336717 0 0 0  
 0.002 0.365975156224132 0.93378888937237  
 TCGA-XF-A9T8-01A-11R-A39I-07 0.00159480121435555 0 0.00118769908450269  
 0.214475152229217 0 0.123262315953386 0.0881628896867491  
 0.035969321289942 0 0 0.038017377669349 0.0208423642235258 0  
 0.116243550656403 0.0878904386367648 0.125785252884507  
 0.00104876264930962 0.0477476675708383 0.0244000227006364 0  
 0.0109085298576936 0.0624638536928194 0.002 0.381150683735652  
 0.925825261540797  
 TCGA-KQ-A41S-01A-12R-A33J-07 0.0484447228229647 0 0 0.0765004949113299  
 0 0.228543395985878 0.00619276789886672 0.0207767643457485 0 0 0  
 0.046462657729866 0.0361020704493546 0.0451419794892575  
 0.0319132321682615 0.301427831671817 0.0125110714034951  
 0.0316494206404597 0.0861618912544506 0 0.0122781674307065  
 0.0158935317975437 0.384 0.0293526731967848 1.06529810326713  
 TCGA-CU-A3YL-01A-11R-A22U-07 0.0232909045312016 0 0.0184532615123717  
 0.266261902017832 0 0.152601854763041 0.0215123157585969  
 0.0949789281530026 0.0343535680757239 0 0.00277992497376303  
 0.0102917685292058 0.0159035511780629 0.0298313825488802  
 0.118974201082928 0.0743395604102125 0.0870786666788007  
 0.00631023703933324 0.0430379727470443 0 0 0 0.429  
 0.0238642537647033 1.0952441572452  
 TCGA-E7-A7XN-01A-11R-A352-07 0 0 0.002573430303655 0.375983973633355  
 0 0 0.177919105173303 0.0260993700299365 0.0239091258144145 0  
 0.0885092349114321 0 0.0110472210963805 0 0.143668104498923  
 0.0595657209767236 0.0574926582670603 0.0123871313539714  
 0.0208449239408451 0 0 0 0.005 0.321752789566299  
 0.96666664322098  
 TCGA-DK-A2HX-01A-12R-A18C-07 0.0499047745295398 0 0.00116851434280966  
 0.0626978976710802 0 0.159199435068349 0.00523619620357835  
 0.0084228566336835 0.0564253642139501 0 0 0.0597368172267124

0.0187041308222999 0.0329208782268595 0.00437068135175412  
 0.19955735084688 0 0.127871548757345 0.213152751167403 0 0  
 0.000630802937754911 0.172 0.0787060717559628 1.04618045444636  
 TCGA-CF-A8HY-01A-11R-A36F-07 0 0.0698973995445063 0.0114269790876023  
 0.138999615114962 0.0374592007607726 0.118389728097281 0 0 0 0  
 0.0844124541344378 0 0.0297143043304606 0 0 0.012312010913844  
 0.326956061879648 0.122666448639312 0.0108611086961325  
 0.0369046888010403 0 0 0.415 0.0256922146659004 1.07453911168229  
 TCGA-4Z-AA7W-01A-11R-A39I-07 0.00629578108126326 0 0.0642411968187228  
 0.408241618665218 0 0 0.117506460931486 0.0866510012252646  
 0.00441553127175518 0 0.0340207667552044 0.0472515120240147  
 0.00281863483801775 0.00399617312543365 0.0686787214086493  
 0.0947526601763476 0.014947868945052 0.0281999412114094  
 0.0179821315221615 0 0 0 0.027 0.19571333737562  
 1.03002738800476  
 TCGA-FD-A43U-01A-11R-A23W-07 0.0177370742839148 0.0228966330286977  
 0.00778950252214549 0.0894221841619609 0 0.0803561345055106  
 0.0194552820562096 0.00663153364496667 0.0526127579193234 0 0  
 0.0295005160069616 0.026518245620243 0.451298381535877  
 0.0209924839487347 0.122783694110111 0.00857342346532758 0  
 0.0434321531900156 0 0 0 0.108 0.107254960198694  
 1.07535381118262  
 TCGA-BL-A0C8-01A-11R-A277-07 0 0 0.00616694551207068 0 0  
 0.252537209379734 0 0.00221828970234429 0 0 0.000384813844851874  
 0.0261033731350265 0.0455536945249692 0.34820890835389  
 0.00307046321230971 0.304442978366271 0 0 0 0.00260073091864005  
 0.00260067275196683 0.00611192029792635 0.443 0.0217519840356921  
 1.12078242019822  
 TCGA-BT-A0S7-01A-11R-A10U-07 0.123089855985377 0 0 0.0948216969961413  
 0 0.169401719898495 0.0217086278315434 0.046804188538164  
 0.0102624602628427 0 0.0338320256695685 0 0 0.137156102757276  
 0.0292427759207364 0.228302256804196 0.06095769683875  
 0.00192252312395045 0.0102253861657185 0.0158841780311051 0  
 0.0163885051761354 0.195 0.0688146412018932 1.05454902486636  
 TCGA-ZF-A9R3-01A-11R-A38B-07 0.00209173505224068 0.0489546007714609  
 0.0448825780107038 0.0657926078530279 0 0.187115178359535 0  
 0.0476404049329328 0.101486538444132 0 0 0.0369540922975885  
 0.0146900737606202 0 0 0.0518915042495869 0.187334781426237  
 0.167590305165892 0.0435755996760413 0 0 0 0.242  
 0.0562039391518445 1.06113868707636  
 TCGA-4Z-AA89-01A-11R-A39I-07 0 0.0559949040582185 3.05851048200118e-05  
 0.166834558557353 0 0.030539008446046 0 0.233113358680042 0 0  
 0 0.021427127697059 0 0 0.191168093917517 0.163332495198596  
 0.0239635900804124 0.0791466788317781 0.0344495994281576 0 0 0

0.527 0.0114306246407388 1.11432839244762  
TCGA-GU-A42P-01A-11R-A23W-07 0.106889722961147 0 0  
0.0496226447890697 0 0.219005170150425 0 0.0514670881639057 0 0  
0 0 0.0118532787486615 0.20995471840793 0 0 0  
0.193167739254988 0.158039637523874 0 0 0 0.774 -  
0.0150561210916989 1.09263740750959  
TCGA-FD-A3NA-01A-11R-A21D-07 0.00141923472877266 0 0.00151090969108338  
0.219817773011654 0 0 0.197914216042579 0.00324872112779971  
0.000333915694875562 0 0.0363220125740398 0.011644643700822  
0.0127202017656196 0.0935031033545967 0.0767274084925804  
0.140353904779114 0.077282033465312 0.0324024302510279  
0.08164238706611 0 0 0.0131571042540136 0.112 0.102891608407427  
1.03645974218702  
TCGA-XF-A9SL-01A-11R-A39I-07 0.24334253614812 0 0.0549198320927034  
0.121578847531563 0 0.0680468392392257 0.0381658309187789  
0.00999999803053961 0.0609407203561304 0 0 0.0291654438942461  
0.0346128585374388 0.0701014856969171 0.00664461780277101  
0.135194530291317 0 0.0113560894935696 0.115930369966679 0 0 0  
0.001 0.489889036935463 0.873013460852481  
TCGA-XF-AAN2-01A-11R-A42T-07 0 0 0.00263825209375859 0.185450402251481  
0 0.123097637386763 0.0840189794305939 0.0894881306235176  
0.00515932117044066 0 0.0897930636395442 0.0177884586976507  
0.00369580602578458 0.0906846212892321 0.103278966745679  
0.100185944918732 0 0.0733477071062369 0.029393274609704 0 0  
0.00197943401088192 0.007000000000000001 0.292327411027543  
0.972193694667138  
TCGA-ZF-AA54-01A-11R-A39I-07 0.00335498255837337 0.00298271513016248  
0.00014294957251928 0.0777075383568868 0 0.0858623089652564  
0.0127094716817271 0.0242086781603198 0.012895511411667 0  
0.00580745113988882 0.00977586243708165 0 0.214882489052238  
0.0443867383046656 0.471182727486782 0.00365831608200373 0  
0.0304422596604273 0 0 0 0.646403979799457 0.77505671215926  
TCGA-GU-A766-01A-11R-A32O-07 0.00912086202237311 0 0.00178513703827758  
0.15391398522338 0 0.0331124405362998 0.244575335392162  
0.0389296616121798 0 0 0.0636167445286816 0.0313109311397944  
0.0485137616245816 0.0355871832921906 0.18107398934383  
0.0493207092655254 0 0.100987560888769 0.00521207005222562 0 0  
0.00293962803972914 0.001 0.40622339614452 0.918838550416273  
TCGA-FD-A6TD-01A-51R-A33J-07 0.0257066742041936 0.00474267460040124  
4.64324936457516e-05 0.13489546076465 0 0.11200814960764  
0.0633358128988623 0.0194191647955895 0 0 0 0.0593474404258644 0  
0.127744685702296 0.0873170930357523 0.273901522454919  
0.0319391427021232 0.0146974502160598 0.0448982960980042 0 0 0  
0.114 0.102526320727606 1.04569936402779

TCGA-FD-A3B4-01A-12R-A206-07 0.175059085313567 0 0.0673948100215729  
0.0859267075815995 0 0.148649694583252 0.0343873227242518  
0.038589207214548 0 0 0.0293786308329598 0 0 0.130680726522112  
0.114649734417394 0.0899203875062504 0 0.00577572236190924  
0.0756741829586314 0 0 0.00391378796195256 0.001 0.398932336609818  
0.91663752205652

TCGA-DK-A1AB-01A-11R-A13Y-07 0.0174836463225686 0 0.0266542427556828  
0.05558682200466 0 0.164358922411665 0.0494586484085168  
0.0244264460281627 0.0287692153753785 0 0.0133852402575833 0 0  
0.159060428539539 0.149891620534387 0.106813815983811  
0.0316891591348471 0.0533702232422536 0.106180640311998 0 0  
0.0128709286889468 0.008000000000000001 0.278969230518001  
0.971387657860232

TCGA-BT-A20X-01A-11R-A16R-07 0.014005324054687 0 0.0799051181863245  
0.163022090029837 0 0.0620694356922011 0.177437463235658  
0.02371687191202 0.00252352951936988 0 0.0538957892041152 0  
0.0169064101101655 0.111017815020854 0.123590667658653  
0.0944374340651193 0.00588984111458346 0.047166356445816  
0.0232083317839232 0 0 0.00120752196667278 0.028 0.19508170364304  
1.00652872468021

TCGA-GV-A3JW-01A-11R-A20F-07 0.046729374613845 0.06008218399645  
0.0391445216111418 0.0881189860994572 0.0858875186480095 0 0 0  
0.0273869026776384 0 0.0686090480554433 0 0 0.129964833011553 0  
0.225487513801387 0.0485031319631384 0.0665948291101525  
0.113491156411784 0 0 0 0.889 -0.0234218863496268  
1.07990119672814

TCGA-UY-A9PB-01A-11R-A38B-07 0.0113592247696829 0 0.0633083449977444  
0.151591398709577 0 0.154884148083523 0.107471806122804  
0.0293547638277413 0.0191615993010297 0 0.0519682254194363  
0.00167060860808633 0 0.139953386728245 0.0971789409787279  
0.130573585635754 0.00603412876731969 0 0.0354898380503292 0 0 0  
0.069 0.13933606945215 1.02938161524599

TCGA-FD-A6TI-01A-11R-A32O-07 0.0851317724914003 0 0.0183094447072988  
0.176969489880328 0 0.22974433154289 0.0159295807633832  
0.0530938003269462 0 0 0.0320709071774477 0.0131848287542175  
0.00707839802018418 0.0396936806824127 0.142981783474697  
0.0157634032894682 0.0440325118797199 0.0681433302621134  
0.0529065782687921 0 0.00496615847870177 0.625 0.000141964151333826  
1.08805048356378

TCGA-XF-AAML-01A-11R-A42T-07 0.0959642698701727 0 0.0331864321870794  
0.217346815621337 0 0.0641211523065909 0.134604445953926  
0.0631061988755938 0.00967298986474902 0 0.0264376835586326 0  
0.0365354401043565 0.0659356477556513 0.025460016038346  
0.0499075912440767 0.00841241645247837 0.0485311608094958 0

0.0782281842121122 0.0310041632389386 0.0115453919064632 0.129  
 0.0949808642014405 1.04387785234642  
 TCGA-ZF-AA58-01A-12R-A42T-07 0.0220042359812803 0 0.00752763078740693  
 0.110231868121781 0 0.0931375315680373 0.09171959691792  
 0.0185767784540895 0.0227506934316648 0 0.0391913738417753 0 0  
 0.248742711369698 0.114389949255 0.213721083257677 0 0 0  
 0.0155375403642904 0 0.00246900664937915 0.005 0.315913145538855  
 0.958948276710458  
 TCGA-FD-A3SP-01A-31R-A22U-07 0.032680372510291 0 0.00616894839087575  
 0.068284932505125 0 0.206930911469734 0.0143782356091887 0  
 0.00913543882885658 0 0.0321750982790244 0 0 0.323462640777092  
 0.0664274453781545 0.164938350663032 0.0458293707582609 0 0  
 0.0256525275052302 0 0.00393572732513471 0.008000000000000001  
 0.270453722020786 0.983857042760248  
 TCGA-E7-A97Q-01A-11R-A38B-07 0.0845601846296101 0 0.070391937669637  
 0.224814256696144 0 0.000302752484951954 0.0822501851263067  
 0.0137973988217704 0.0243091295125063 0 0 0.0517133349969803  
 0.00832136522554811 0.00423005893482189 0.150639225408939  
 0.147112920735787 0.0107321826675898 0.00870591374033178  
 0.118119153349075 0 0 0 0.213 0.0637282904117561  
 1.06538894885734  
 TCGA-YC-A9TC-01A-22R-A39I-07 0.0113023759529123 0.0226172515320768 0  
 0.12106461987648 0 0.0647652715629177 0 0.0205389792713462  
 0.0359216478197321 0 0 0.136093503559977 0 0.121367538593368  
 0.00687565554366045 0.215942482318225 0 0.0321240651481803 0  
 0.20558138769552 0.00571204548379671 9.31756418058219e-05 0.177  
 0.076834457189849 1.08418068347786  
 TCGA-GV-A3QG-01A-11R-A220-07 0.225015558970244 0 0.0572439534176294  
 0.141298958205614 0 0.0788357543564481 0.0389748859918939  
 0.0472692134464129 0.0262799442050525 0.0025624477530815 0  
 0.0252442781426937 0.00372922816428819 0.168316548680639  
 0.0823102251963761 0.0712055724917497 0.00122048523384697 0  
 0.0304929457440296 0 0 0 0.001 0.464507134179127  
 0.884783753439238  
 TCGA-K4-A6FZ-01A-11R-A31N-07 0.0484099941499532 0 0.00552924580089079  
 0.119978803190689 0 0.200706668787976 0.0016930142583759  
 0.0270132601687681 0.00507280459395356 0 0 0 0.00745798360018893  
 0.175038335785447 0.0744733504339305 0.10114926281492 0  
 0.0715524032414285 0 0.11718336770435 0 0.0447415054691273 0.039  
 0.177828581270213 1.01788295355808  
 TCGA-KQ-A41R-01A-21R-A352-07 0 0.0284164235163872 0.00170412990688372  
 0.0454183129756648 0 0.158717621118517 0 0.0434749722241603  
 0.0714120174327945 0 0 0.0533441667077324 0 0.099726410676555  
 0.0654536297820611 0.187851569481975 0 0.0980406758222641

0.139711534806294 0 0 0.00672853554871064 0.682 -  
 0.00618162399525279 1.08212996871803  
 TCGA-DK-AA6M-01A-11R-A39I-07 0.00637545354701382 0 0.00181683998253958  
 0.0404551774904096 0 0.207594014829394 0.0022072661878258  
 0.00031797120443626 0.015216755859354 0 0 0.0852109601108595  
 0.0311725578705678 0 0.0683679682470904 0.187608571361666  
 0.23770102607132 0 0.109128349953675 0 0 0.00682708728384727  
 0.00600000000000001 0.305811936289931 0.956130958812757  
 TCGA-ZF-AA52-01A-12R-A39I-07 0.0262103043891675 0 0 0.0826972366205894  
 0 0.074542249485677 0.0133022831838572 0.00884343765400242  
 0.00538287196437646 0 0 0.0492001277335648 0 0.35259410531087  
 0.0375075500199528 0.248622287691583 0.03427604920562 0 0  
 0.0484092315570076 0 0.0184122651837321 0.123 0.0980816643668297  
 1.07871386903655  
 TCGA-K4-A5RJ-01A-11R-A28M-07 0.00284613303000989 0 0.00107810057057314  
 0.308544959980704 0 0 0.0911849581550494 0.0359226417002355  
 0.0411381831079189 0.00944988398956532 0 4.39688282835635e-05  
 0.00349402941167129 0.0260186346698056 0.0868306985977373  
 0.299010802201456 0.078791103817196 0 0.0132880318109138 0 0  
 0.00235787012887976 0.001 0.44500168358996 0.894735469680047  
 TCGA-HQ-A5ND-01A-11R-A26T-07 0 0.00733508354767459  
 0.00263727188388333 0.212565352940419 0 0.146705745794757  
 0.126625579523775 0 0 0 0.0462965160794033 0.0154753067010517 0  
 0.068450186550055 0.204929187247926 0.0392859907998078 0  
 0.0694387345971751 0.058601821555951 0 0 0.00165322277812172 0.045  
 0.168272722698472 1.04711383696706  
 TCGA-BT-A3PK-01A-21R-A220-07 0.0197131620958949 0 0.00239199004756767  
 0.0344233576876605 0 0.0771140453545964 0.0652078498846654  
 0.0281041873495302 0.012178742425468 0 0.0242018768864376 0 0  
 0.210793444251677 0.0935840103463461 0.0918966262611042 0  
 0.165678650306577 0 0.116490526411013 0 0.0582215306914619 0.016  
 0.231516761246473 1.00256180998055  
 TCGA-FD-A3N6-01A-11R-A21D-07 0.00107839746247286 0 0.00906648569423226  
 0.192194008312256 0 0.0908550098671097 0.0914983614122454  
 0.0750915985168387 0 0 0.010096599864147 0.016265168788953 0  
 0.15744978959602 0.248111093833362 0.078494377137188  
 0.0106145709345565 0 0.0191845385806194 0 0 0 0.005  
 0.319513555288838 0.970910479612664  
 TCGA-UY-A78P-01A-12R-A36F-07 0.0126941052100467 0.0037955787058521  
 0.00275586490412633 0.117457729944152 0 0.0749383205448524  
 0.0655228801671655 0.0753159440240419 0 0 0.0160536756896474 0 0  
 0.308406317744092 0.099814173281485 0.12041376731195  
 0.0269897112115444 0 0.0621347064060814 0 0 0.0137072248549639  
 0.004 0.337271276482939 0.948058214843384

TCGA-CF-A9FL-01A-11R-A38B-07 0.0192997344797778 0.0285639165134095  
0.0921055788435034 0.100485247460586 0 0.0824368670952333  
0.000835653441059969 0.0660814763917072 0.00501572009088124 0 0 0  
0.0127348902897677 0.189910909659756 0.0195411975693612  
0.133161873878502 0.0364799532426507 0.00725131596339912  
0.199954451014964 0 0.00482821337750679 0.00131300068793484 0.269  
0.048752807679282 1.05964662914432

TCGA-CF-A9FM-01A-11R-A38B-07 0 0.000845128087006627 0  
0.0885062982738656 0 0.140945143071682 0 0.00819279517293481  
0.0866226754043835 0 0 0.0880054212884888 0.0151231692001807  
0.0382129014514672 0.0456640146559173 0.0961277816291431  
0.0959766801038148 0.190904083667938 0 0.0653656386685268 0  
0.0395082693246508 0.296 0.0438933292831223 1.07842965617484

TCGA-ZF-A9RD-01A-11R-A42T-07 0.0958052679384131 0 0 0.133320418173456  
0 0.151549520450322 0.125527903922498 0.0427033756958312 0 0 0  
0.0317271946120178 0.00707460439808559 0.0777766344346835  
0.119976191226032 0.106890215363053 0.0135828003964809 0  
0.0940658733891274 0 0 0 0.023 0.208315699221771  
0.998838709653336

TCGA-G2-AA3D-01A-11R-A39I-07 0.181412981244331 0.0782182979264901  
0.0496556745379739 0.167080263462487 0 0.0226930611212386  
0.0194091767996297 0.0346382668131809 0.118609867385606 0 0  
0.0307745481272871 0.0094763423552757 0.010657049087203 0  
0.0944092821604025 0 0.130132026963068 0.048365542573932 0 0  
0.00446761944189392 0.614 0.00207891485811782 1.09963082109203

TCGA-DK-A2I2-01A-11R-A180-07 0 0.0451561269823483 0 0.0563217410602656  
0 0.160556899763707 0.00135852008763346 0 0.00217986825366021 0  
0.0231761089889094 0 0 0.186122857313277 0.0419247395498943  
0.121667643452379 0.125562470517054 0 0 0.186009807840835  
7.77340137206686e-05 0.0498854821763163 0.007000000000000001  
0.298149158438592 0.965766106890962

TCGA-FD-A62S-01A-11R-A30C-07 0.0147159189999524 0.0209596774154108  
0.0146410250519319 0.0506570995268274 0 0.243059602783663  
0.000924878614859304 0 0.0235630089327851 0 0  
0.00942317330112375 0 0.230691063198602 0.0716313279125659  
0.129885631393174 0.0960742970778481 0.026764039517841  
0.0670092562734154 0 0 0 0.098 0.11050684481381  
1.04207565719221

TCGA-MV-A51V-01A-11R-A26T-07 0.111184245416099 0 0.0360320661338172 0  
0 0.354059176327971 0 0.118392322412473 0 0 0  
0.0469108389070822 0.0101468448736093 0 0.0411900729743908  
0.114617704659627 0 0.080644537371267 0 0.0868221909236636 0 0  
0.52 0.0121379993083649 1.091633026405

TCGA-E5-A2PC-01A-11R-A206-07 0 0 0.00607828577034511 0.1635608013805 0



|                              |                      |                      |                     |                    |                    |   |   |                    |
|------------------------------|----------------------|----------------------|---------------------|--------------------|--------------------|---|---|--------------------|
| 0.129748742474792            | 0.0801382775814932   | 0.11521011259859     |                     |                    |                    |   |   |                    |
| 0.0395235633968507           | 0                    | 0.041048366795968    | 0.0460987224999875  |                    |                    |   |   |                    |
| 0.0463821485725867           | 0.0329088566359674   | 0.12429339357022     |                     |                    |                    |   |   |                    |
| 0.0599488321701698           | 0.0704741452737826   | 0                    | 0.0445857512787474  | 0                  | 0                  | 0 |   |                    |
| 0.091                        | 0.119758223659396    | 1.04999035151699     |                     |                    |                    |   |   |                    |
| TCGA-DK-A3X2-01A-11R-A22U-07 | 0                    | 0.0355928926832122   | 0                   | 0.199376022602945  |                    |   |   |                    |
| 0                            | 0                    | 0                    | 0.0543349189153206  | 0                  | 0                  | 0 | 0 | 0.0140798414658213 |
| 0.234556369114168            | 0                    | 0.23354714117974     | 0                   | 0.180821501683315  |                    |   |   |                    |
| 0.0394972856196954           | 0                    | 0.00142545369093732  | 0.00676857304484523 | 0.512              |                    |   |   |                    |
| 0.0131236673062452           | 1.09479774971268     |                      |                     |                    |                    |   |   |                    |
| TCGA-GD-A76B-01A-11R-A32O-07 | 0.0120318857189907   | 0.00725007169812712  |                     |                    |                    |   |   |                    |
| 0.0773275286385538           | 0.141173829049938    | 0                    | 0.040034132030634   |                    |                    |   |   |                    |
| 0.104465632709077            | 0.0375866001370214   | 0.186977360372467    | 0                   |                    |                    |   |   |                    |
| 0.00315998762561511          | 0.0268147105745088   | 0.0154076148329007   |                     |                    |                    |   |   |                    |
| 0.0151059687584741           | 0.11604157944506     | 0.0628106556223951   |                     |                    |                    |   |   |                    |
| 0.132178795929405            | 0.00894142529299296  | 0                    | 0.0095259804086317  |                    |                    |   |   |                    |
| 0.000447424266709387         | 0.00271881688849815  | 0.024                | 0.201742583895673   |                    |                    |   |   |                    |
| 1.00745973390922             |                      |                      |                     |                    |                    |   |   |                    |
| TCGA-GC-A6I1-01A-12R-A31N-07 | 0                    | 0.0112431188881438   | 0.0423725513026475  |                    |                    |   |   |                    |
| 0.179083246759767            | 0                    | 0.0868811587774048   | 0.119109780544112   |                    |                    |   |   |                    |
| 0.0177156755057317           | 0.0295231243730202   | 0                    | 0.0427321666532698  |                    |                    |   |   |                    |
| 0.000533341480527794         | 0                    | 0.232109231537922    | 0.0726415156607599  |                    |                    |   |   |                    |
| 0.137586231780028            | 0.000768123351914855 | 0                    | 0                   | 0.0249069846367489 | 0                  |   |   |                    |
| 0.00279374874800171          | 0.078                | 0.129775680089387    | 1.03759374080212    |                    |                    |   |   |                    |
| TCGA-BL-A13J-01B-04R-A277-07 | 0.0491633854994836   | 0                    | 0.00818347498617891 | 0                  |                    |   |   |                    |
| 0                            | 0.1997625156113      | 0.047821433976379    | 0.0444525568242327  | 0                  | 0                  |   |   |                    |
| 0.0536691813192423           | 0                    | 0.00105782648933744  | 0.0255689369561346  |                    |                    |   |   |                    |
| 0.047106697298456            | 0.294714624892984    | 0                    | 0.097373178457889   |                    |                    |   |   |                    |
| 0.0428296106828805           | 0                    | 0.088296577005502    | 0                   | 0.412              | 0.0265782623670891 |   |   |                    |
| 1.06237711572967             |                      |                      |                     |                    |                    |   |   |                    |
| TCGA-XF-A9SK-01A-11R-A42T-07 | 0.0116041427008177   | 0                    | 0.0444592332114346  |                    |                    |   |   |                    |
| 0.0486260363730255           | 0                    | 0.204467117579888    | 0                   | 0.0195164096566587 |                    |   |   |                    |
| 0.0843150405352793           | 0                    | 0                    | 0.0351475093602545  | 0.0675023432607608 |                    |   |   |                    |
| 0.00203390685934985          | 0.0798016286761234   | 0.227028964990339    |                     |                    |                    |   |   |                    |
| 0.0282566193231972           | 0.084604021735207    | 0.0608785842206695   | 0                   | 0                  |                    |   |   |                    |
| 0.00175844151699565          | 0.029                | 0.191809657990306    | 1.00313835981617    |                    |                    |   |   |                    |
| TCGA-DK-A1AD-01A-11R-A13Y-07 | 0.126742508248002    | 0                    | 0.00979596152647738 |                    |                    |   |   |                    |
| 0.250981069486271            | 0                    | 0                    | 0.0854726922849955  | 0.0270621882734167 |                    |   |   |                    |
| 0.0596056948795291           | 0                    | 0                    | 0                   | 0.0250251840478754 | 0.0117823017861983 |   |   |                    |
| 0.211674850676198            | 0.123299734601728    | 0.02452089312229     |                     |                    |                    |   |   |                    |
| 0.0326870807125426           | 0                    | 0.000284028960492144 | 0.0110658113939848  | 0                  |                    |   |   |                    |
| 0.012                        | 0.244262892116011    | 1.0020676523125      |                     |                    |                    |   |   |                    |
| TCGA-K4-A5RI-01A-11R-A28M-07 | 0                    | 0.010161195477403    | 0.00116253823262102 |                    |                    |   |   |                    |
| 0.00927824493764494          | 0                    | 0.0864194667256608   | 0                   | 0.0493581230363072 |                    |   |   |                    |

0.0161993693849185 0 0.0675978791524715 0.08622942311144  
 0.0473148209319456 0.0040757647378716 0.00214094220315635  
 0.109792469523798 0.230610511941027 0.0592314158209756  
 0.20062369888235 0 0.019804135900409 0 0.02 0.215550086675961  
 0.993331419237244  
 TCGA-FD-A3SQ-01A-21R-A22U-07 0.276695207858854 0 0.121031168701053  
 0.0326144253852774 0 0.0642989395853015 0.00265652932439543  
 0.0314033218002162 0.0247716246315716 0 0.023440067976125  
 0.0157834157288709 0 0.280722952993185 0.0192893577704351  
 0.0379590865843012 0.0143441090336417 0 0.0549897926267716 0 0 0  
 0.001 0.444085854111817 0.898045439100313  
 TCGA-GV-A3QF-01A-31R-A22U-07 0 0.112521978201234 0 0  
 0.14602937668418 0 0.0149612381741357 0 0 0 0.111037638044835  
 0 0.0545581070666118 0.0881611534731943 0 0.000598711859482137 0  
 0.231892985758529 0 0.0199537898282423 0.00667778925615605  
 0.213607231653401 0.332 0.0373944516748654 1.08827866699357  
 TCGA-E7-A7DV-01A-11R-A33J-07 0 0.00276777853360682 0 0.0352071713032614  
 0 0.122886277673379 0.02171421908605 0 0 0 0.0201474071469011  
 0.00504034428320894 0.0865064310352606 0.211221807678431  
 0.08505169072116 0.399789101524811 0 0 0 0.00880833015752012 0  
 0.000859440856410013 0.003 0.357029159325839 0.944547157822491  
 TCGA-XF-AAN1-01A-31R-A42T-07 0.00627341802278851 0.0357500078495027  
 0.00051733080556038 0.159009517117592 0 0.189118988108042 0  
 0.0737381557810324 0.00849549125867437 0 0 0 0.0438020065803535  
 0.0148598884152512 0.0262625491322998 0 0.166220022945116  
 0.206699835819556 0 0.0692527881642303 0 0 0.317  
 0.0398930926899248 1.078544446605925  
 TCGA-DK-AA6P-01A-11R-A39I-07 0.0550671151825919 0.0199504074021327 0  
 0.109505073830135 0 0.11621580438419 0 0.0250502581025802  
 0.0837356909116579 0 0.037470593242783 0.0147383888628869  
 0.00920178659271075 0.169694393432443 0.019965446464337  
 0.0688497989230549 0.0460476499007033 0.0622229444365816  
 0.162284648331212 0 0 0 0.466 0.0192013250121626  
 1.06835037863344  
 TCGA-CF-A47Y-01A-11R-A23W-07 0.0256438402791207 0 0 0.192602064388806  
 0 0.341169738222231 0 0.0228984225508161 0 0.0350365343360978 0  
 0 0.0255658530899675 0 0.0378489161555739 0.181124706270006  
 0.0563244173836111 0 0.0736361309764128 0 0.00814937634735665 0  
 0.379 0.0299571966084143 1.08900328951218  
 TCGA-CF-A3MI-01A-11R-A20F-07 0 0.046173911688538 0.00287608844469034  
 0.182924811287812 0.0344605435827265 0.0284045516460488  
 0.0925610459438852 0 0.00659495421338856 0 0 0.0274969601507018  
 0.0102694104020329 0.144755308796981 0.00843962672981655  
 0.24386796556552 0.0227605291574099 0.0728119177986172

0.0756023745918315 0 0 0 0.327 0.0377804740491692  
1.06267990484763  
TCGA-G2-A2EL-01A-12R-A18C-07 0 0.0355675093789098 0 0.142736428533291  
0 0 0.0948190817374493 0.107848175199017 0.00323344274402676 0 0  
0.0842921254367612 0 0.238160920891692 0.145998426735824  
0.00231435306293608 0.0875263840279574 0 0.0575031522521348 0 0 0  
0.955 -0.0327719785115601 1.11276543774858  
TCGA-XF-AAMZ-01A-11R-A42T-07 0.396794479261848 0 0.0259785117839057  
0.0625188449836842 0 0.153196363704993 0.011522736974074 0  
0.119428119479818 0 0 0 0.0243487914596571 0.0263791732008488  
0.0339877934760531 0.127650086047611 0 0.00237048918120557 0  
0.00637481509323484 0 0.00944979535306693 0.001 0.415186608055685  
0.916708420252789  
TCGA-DK-AA6L-01A-11R-A39I-07 0.045798876395867 0 0.0158406288249164  
0.0706269219399079 0 0.0935195851203428 0.0178069159609752  
0.0510450212106721 0.0385549067629306 0 0 0.033054112741826  
0.00791514918973439 0.23174920013063 0.0483025482034054  
0.120707931435891 0.188051824838714 0 0.0370263772441875 0 0 0  
0.009000000000000001 0.256988171203703 0.979913091648923  
TCGA-XF-A9T4-01A-11R-A39I-07 0.00496293430916424 0 0.0219328583429961  
0.120495519836275 0 0.19946068212603 0.0180994331718642  
0.0464679403730501 0 0 0 0.0786036673774714 0.00155708562556429  
0.113097577483964 0.127807173013796 0.10147152366512  
0.0661771323494635 0.00972291544312474 0 0.0597417170768993  
0.0168954630633806 0.0135063767418363 0.021 0.213773025012669  
1.00473464500989  
TCGA-K4-A6MB-01A-11R-A31N-070 0 0 0.0354161671546602 0  
0.0930529406503348 0 0.0341011569012169 0.0183664854208638 0  
0.0185839668678767 0 0 0.499908667182833 0.0206658435551831  
0.148530225960669 0.00322442056148957 0.0561174571775344  
0.065888503458273 0 0.00145933108638781 0.00468483402267721 0.136  
0.093100888196416 1.10157787683249  
TCGA-UY-A8OB-01A-12R-A42T-07 0 0 0.00233009733966097 0.268171096165401  
0 0.106773636704107 0.140055631169242 0 0 0 0.0928029202584979  
0.04339156123734 0.0154510718824813 0.105566362793959  
0.0425200617863646 0.100820200009653 0 0.0563788726774693  
0.0257384879758239 0 0 0 0.054 0.154196089136888  
1.03974417729584  
TCGA-ZF-A9R5-01A-12R-A42T-07 0 0.0752847178579395 0.0106292974078931  
0.147853289376068 0 0.342575498240878 0.0310479108532436  
0.0713692581079537 0.0296055998853544 0 0.0271411615010605 0  
0.0152207636658438 0.0152856702031496 0 0.094737291557871 0  
0.0547526252304878 0.0844969161122572 0 0 0 0.092  
0.117251137866713 1.05634438185091

TCGA-CU-A3KJ-01A-11R-A21D-07 0 0 0.00364934445657117 0.121764932037473  
0 0.211510583079277 0.0787996714875754 0.0437122594660287 0 0  
0.0435850583807298 0 0.00747635267319519 0.160595503715669  
0.0726240270082276 0.0780479328608001 0.0360504211772761  
0.0449866899185003 0 0.0776398663724659 0 0.0195573573662097 0.326  
0.0380337739852264 1.0749135643651

TCGA-DK-AA6S-01A-21R-A39I-07 0 0 0.00314695812841578 0.132153896771709  
0 0.21121402645281 0.0780667643125569 0.079854910805596  
0.0407975000898261 0 0 0 0.1048304240237 0.163954078270587  
0.115439381299035 0.0395916204948061 0 0.0309504393509574 0 0 0  
0.002 0.368889292706882 0.934560152857049

TCGA-E7-A85H-01A-11R-A352-07 0.107797255613552 0 0.0465023846398196  
0.156466269034332 0 0 0.0693786926783103 0.0550507718874571  
0.083601284080758 0 0 0.0535131880225655 0.00803825807026904  
0.0878463048115969 0.0954083969193548 0.0741057411057878  
0.109814699422001 0 0.0524767537141966 0 0 0 0.05900000000000001  
0.149514531057772 1.02025271983011

TCGA-G2-AA3C-01A-21R-A39I-07 0 0 0 0.0475464738016453 0  
0.0857176508151562 0 0 0 0 0.056886458338822  
0.185974952110096 0 0.0105815262769532 0.552568884676448 0 0  
0.0607240539808791 0 0 0 0.315 0.040284661364522  
1.09611136544605

TCGA-E7-A8O8-01A-11R-A36F-07 0 0.0175640745464063 0.0105901873144623  
0.10422925823951 0 0.144327523888715 0.0190722762227423  
0.0704855901385989 0.00282010354228553 0.0029166945670559 0  
0.128492237035349 0 0.147669538606324 0.0181746564470008  
0.107268797508889 0.0673926353230017 0.0591640353724358  
0.0998323912472231 0 0 0 0.202 0.0667879673732891  
1.0603071215882

TCGA-XF-A9SM-01A-11R-A42T-07 0.0122766360970192 0 0.00179044714030276  
0.21852508099734 0 0.101598507263432 0.189760586654828  
0.0343088199267592 0.00874649104217056 0 0.0283901921978194 0  
0.00502478750996432 0.0421967518876813 0.0777375468784473  
0.214956272996552 0.0158903040187999 0 0.0430295683383189 0 0  
0.0057680070505651 0.01 0.250596171041503 0.982611891542382

TCGA-DK-A3IN-01A-11R-A20F-07 0.0693906282425389 0 0.0393062192415176  
0.146808521485649 0 0.224411005336046 0.00356451187136251 0  
0.0105192054504327 0 0 0.0192177193734268 0.00726876782126498  
0.0105659908672198 0.0337177901322481 0.371095346628847  
0.0156587570457999 0.00554902865895598 0 0.0242756300178641 0  
0.0186508778268257 0.039 0.177491651097042 1.0149803065189

TCGA-XF-A8HC-01A-11R-A36F-07 0 0.0737420451295053 0 0.0987529502224941  
0 0.250309323029495 0 0.0442053327045476 0 0.0682703524436909 0  
0 0 0.242353953417966 0 0.0263336884157225 0 0.017904124228539

0.153418941935108 0 0 0.0247092884729316 0.777 -  
 0.0153564454547325 1.09924812489439  
 TCGA-ZF-AA4W-01A-12R-A38B-07 0 0.0246550380853206 0.00121085890440907  
 0.056762640717182 0 0.0658141242503892 0.0855605953548976  
 0.0555470327599422 0 0 0 0.140352814338952 0 0.159145281180265  
 0.15051805692645 0 0 0.145261898892521 0.0625539226219354 0 0  
 0.0526177359677358 0.0610000000000001 0.147127709899095  
 1.05176790911622  
 TCGA-LC-A66R-01A-41R-A30C-07 0 0.011184776438077 0.0346555961169076  
 0.185427361760791 0 0.131511241509937 0.157187450824587  
 0.0290059395168814 0.002645381321594 0 0.100894717526372 0  
 0.0037789109217044 0.0446332821005381 0.0784378749714176  
 0.136002988406971 0 0.0560268244114586 0.0234389352072892 0 0  
 0.00516871896547418 0.152 0.0828542517922052 1.05799814962304  
 TCGA-E7-A8O7-01A-11R-A36F-07 0.0536369730098912 0 0.0725580233062383  
 0.111052814959301 0 0.0412975490757189 0 0.048873925298213  
 0.106938019317115 0.00507758574354449 0 0.00312784048584535  
 0.00634696424129055 0.0117780158543612 0.00625341140885496  
 0.0648646146361298 0.196665183119915 0.12462362479271 0  
 0.109029575127372 0 0.0378758796234984 0.029 0.191680903603164  
 1.00213379212416  
 TCGA-LT-A8JT-01A-11R-A36F-07 0.0204928333868346 0.0483304239016585 0  
 0.150938036900983 0 0.335719060228447 0 0.0962432597259365  
 0.0075325455408854 0 0 0.0116255816594392 0.0308050523946558  
 0.043635200982862 0.0620494559518705 0.048959368192055  
 0.0312154818823678 0.0699288943970736 0.0425248048549307 0 0 0  
 0.124 0.096870894953078 1.06569367010145  
 TCGA-FJ-A3Z9-01A-11R-A26T-07 0.00479517984015402 0 0.0165256438022077  
 0.027284186964531 0.174799463523682 0.0498207600593638 0 0  
 0.0282434546202708 0 0.00838901481767924 0.0630445904156763  
 0.014900507831712 0.291867702161876 0 0.0378845189143922  
 0.104907620328266 0.116697668922017 0.0604800457463203 0 0  
 0.000359642051851964 0.303 0.0422884593682692 1.07698215542346  
 TCGA-DK-A1AC-01A-11R-A13Y-07 0.0873575477994603 0 0.0890148879039316  
 0.186561006805962 0 0.157221099503566 0.0766118355826607  
 0.0572255295630474 0.0221828117866809 0 0.00138986687607767 0  
 0.00964335644892154 0.100084439235256 0.0504793330924479  
 0.0999062295961289 0.00685934229936496 0 0 0.0367249164563672  
 0.018737797050127 0 0.00600000000000001 0.304286772669759  
 0.960520105042583  
 TCGA-C4-A0F1-01A-11R-A034-07 0.0316304692829907 0 0.0577751115618316  
 0.0274233796762805 0 0.180493456374924 0 0.0256660733270195  
 0.00905567747830635 0 0 0.0499915482124999 0 0.0952608414170548  
 0.148871574444207 0.101447862455519 0.0848039077241476

0.0158805999168765 0 0.129716165651671 0.0200489050172816  
0.0219344274593903 0.017 0.230079004767614 0.995334296882413  
TCGA-G2-A2ES-01A-11R-A180-07 0 0 0.00203000829522398 0.0870230897850075  
0 0.12605738205904 0.148635684265757 0.0213412873678636  
0.00689795661423626 0 0.0397011807416891 0.00708876106791175 0  
0.187881188246769 0.090177790000045 0.160739151868573 0  
0.078062095594293 0.00809603255300648 0 0.0333555083630311  
0.00291288317755226 0.00800000000000001 0.269241308449389  
0.976383001062354  
TCGA-XF-AAN4-01A-11R-A42T-07 0.0304669527378248 0 0 0.0727130481954705  
0 0.0767444130978995 0.0575213367688324 0.0188774454880135  
0.00531430458547175 0.00979178134521152 0 0.0386297783014668  
0.0744494413830589 0 0.145919393990174 0.202176482294564  
0.0275268269000519 0.0230443772510037 0.189745108458795 0  
0.0270793092021622 0 0.001 0.481120571024135 0.878380726153302  
TCGA-4Z-AA83-01A-11R-A39I-07 0 0 0 0.0408023320531115 0  
0.0882655613013809 0 0.0200180518942865 0.0811241178880778 0 0  
0.0859754446341042 0 0.205963921484573 0.043867464138128  
0.119901693478764 0.0566977701760806 0.169660095881535 0  
0.0405763400925178 0 0.0471472069774408 0.151 0.0843271484858587  
1.06559015791448  
TCGA-E7-A5KE-01A-11R-A28M-07 0.0444026540474572 0 0 0.044673387975595  
0.0754911382503901 0 0 0 0.0279588662891904 0 0.29733879180387  
0 0.0416315537236424 0.0405735652134584 0.0132688657653883 0 0  
0.244043856644529 0 0.164198849120955 0.00541250283792762  
0.00100596832759584 0.784 -0.0156352478711498 1.13969343771357  
TCGA-ZF-AA4V-01A-11R-A38B-07 0.00253945500324118 0 0.0159082297955375  
0.255320394476736 0 0.0655793030178285 0.0949774006546438  
0.0539780228562253 0.0227543623766036 0.0597199857269916 0  
0.0482626444887443 0 0.116351125929361 0.0976741364410677  
0.0912711650622764 0.0326503192474099 0.00579903189971066  
0.0372144230236221 0 0 0 0.013 0.241666237466689  
0.995545182499662  
TCGA-ZF-AA53-01A-11R-A39I-07 0.0133542332612322 0 0.00179023642919068  
0.13233502050669 0 0.0947329335535367 0.0478882449715115  
0.0457511211727325 0.00104473478908089 0 0 0.0598758410370503  
0.0155467332169108 0.0848184848397187 0.172537143712603  
0.199488035040164 0.0944663186385847 0 0.0151515860355029 0  
0.0109802951754327 0.0102390376200582 0.00900000000000001  
0.264691022846101 0.982415636111023  
TCGA-ZF-A9RM-01A-11R-A38B-07 0.0292099467298504 0 0.000541344929193205  
0.211477365660208 0 0.257818620516419 0 0.033889561780514 0 0  
0 0.132863303504413 0.0303266199101802 0.0688045964447717  
0.0231009021862478 0.0584440328462538 0.046162941278137

0.0455183217197438 0.0618424424940678 0 0 0 0.69 -  
 0.00713492031936894 1.11726375440396  
 TCGA-BL-A13I-01A-11R-A13Y-07 0.00786879310788694 0 0 0.042191592626282  
 0 0.167042581845197 0.00685190087522757 0.0446831052355492  
 0.0359405641258586 0 0 0.00941177238065108 0.0319257234327599  
 0.0305242520614252 0.0240023068832996 0.523033141084997 0 0  
 0.0744824591841984 0.00204180715666758 0 0 0 0.604050459326932  
 0.80992869220873  
 TCGA-CU-A72E-01A-12R-A33J-07 0 0.0168008348266425 0 0.0318951503824108  
 0 0.145030849875088 0 0.0226886334655166 0.00511381236932669 0 0  
 0.0253837942270811 0 0.427364579565722 0.0308084839932663  
 0.193242535504175 0.0112140695860449 0 0.0675649615121047 0  
 0.0228922946926212 0 0.019 0.219288554396397 1.02260656111584  
 TCGA-2F-A9KR-01A-11R-A38B-07 0.0626886707547808 0 0.0487918290265976  
 0.114322877498256 0 0.128151552926457 0.0151267035023001  
 0.167686062997816 0 0 0.000344302959184559 0.0750313180030195  
 0.0211881620791825 0.0571801198084198 0.000802257212939917  
 0.045975923524175 0.0343553135668916 0.111705206298455  
 0.0734229716468822 0 0.0239075323946952 0.0193191957999477 0.315  
 0.040628775245854 1.06711764797578  
 TCGA-E5-A4U1-01A-11R-A31N-07 0.0632550714685323 0 0 0.096121285143487  
 0 0.225980342299661 0 0.035761052939729 0 0 0.169951104329564  
 0 0.0180133846754785 0.0581350349654754 0 0 0.131293958287019  
 0.0447336646266275 0.156755101264426 0 0 0 0.79 -  
 0.0160048617191371 1.09460558209142  
 TCGA-E7-A3Y1-01A-11R-A22U-07 0 0.0350493003371257 0.017369710315597  
 0.141696103953152 0 0.202264314298799 0 0.116065122467859  
 0.0299752247690156 0.00851835676470503 0 0.0932901505679879  
 0.00343789151118945 0 0.0320455225623084 0.147973281287107  
 0.0486195687041113 0.00405291549877907 0.119642536962263 0 0 0  
 0.324 0.0388644109238926 1.08116279731836  
 TCGA-FD-A6TC-01A-21R-A33J-07 0 0.0177045205965637 0.0305329791352131  
 0.00479253153866801 0 0.104195889621153 0 0 0.00395311875279318 0  
 0.0256166988332493 0 0 0.455286739542758 0.00197079781024959  
 0.229558630181341 0 0.0406493564608724 0 0.0769808232062445 0  
 0.00875791432089368 0.092 0.115309375718445 1.09314707054948  
 TCGA-FD-A5BV-01A-11R-A26T-07 0.0968393506027499 0 0 0.140108558041207  
 0 0.173756965340289 0 0 0 0 0 0.0631957301360439  
 0.019566032163189 0 0.0408178585427503 0.340792816350162 0 0  
 0.098964923669349 0 0.0205547883316748 0.00540297682258492 0.376  
 0.0305836780676271 1.06860400749261  
 TCGA-DK-A2I4-01A-11R-A21D-07 0.0814053048652701 0 0.0405564625316941  
 0.171130775873856 0 0.15597815489304 0.0961819001896014  
 0.0313292780675219 0 0 0 0.043647533855059 0.0122657287311368

0.0452259312578433 0.0755295859197793 0.169310513685413  
 0.0168002920325417 0 0.0538382660087039 0 0 0.00680027208853908  
 0.004 0.338398264791188 0.942939155589552  
 TCGA-UY-A78M-01A-21R-A352-07 0.0494537146526077 0 0.00967325887647745  
 0.0204076560675953 0 0.0728971822767014 0 0 0.045096465460013 0  
 0 0.0447318661715473 0 0.532344515046802 0.0508526179619869  
 0.0622775208406551 0 0.0418133995704139 0.0690372638193225 0 0  
 0.00141453925587691 0.198 0.0678563649444664 1.11196949536091  
 TCGA-4Z-AA7R-01A-11R-A39I-07 0.0920996437568527 0 0.0423699206588811  
 0.0833386967701807 0 0.0814376528434184 0 0.0396823233340784  
 0.0377433111003432 0 0.0200659503346905 0 0 0.16903928979301  
 0.0108859767876897 0.34145797498852 0 0.0151373198554991 0  
 0.0603291066396717 0 0.00641283313716492 0.045 0.167179181718321  
 1.02276484735391  
 TCGA-E7-A519-01A-11R-A26T-07 0 0.00912617582936204 0.0916947079807078  
 0.101477076391897 0 0.160268612931676 0.00477878495410194 0  
 0.126160060140705 0 0.0957790936754652 0 0.063221311985843  
 0.175674144911178 0 0.0613540087350772 0.000911493142954354  
 0.0938059403180863 0.0147105631828785 0 0 0.00103802582006743  
 0.009000000000000001 0.26240912927687 0.978609411964877  
 TCGA-DK-A3IU-01A-11R-A20F-07 0.148450367246654 0 0.0164064713135927  
 0.185725911676814 0 0.147078176857928 0.105802712054633  
 0.00463457420052443 0.0382456951169632 0 0 0.00659334196539446 0  
 0.107127553421016 0.100135768923335 0.0890046880628012 0 0  
 0.0354077088989265 0 0 0.0153870302614186 0.001 0.483449166503294  
 0.87598531141132  
 TCGA-FD-A3SM-01A-11R-A22U-07 0 0.00706504276836195 0.0241609312089867  
 0.0180935192423316 0 0.147975521042953 0 0.0450195272152951 0  
 0.00271584565418242 0 0.0196244438480297 0 0.518524174906169  
 0.0634540688990839 0.0610791483928689 0 0.0152828231361899  
 0.0770049536855474 0 0 0 0.175 0.0780457175084432  
 1.10288724033057  
 TCGA-BL-A5ZZ-01A-31R-A30C-07 0.00407331360239903 0 0.000845530171464626  
 0.0122443241090006 0 0.117795115073974 0.0353304112519708  
 0.00373408765213526 0 3.64758384109012e-05 0.0337115009410939  
 0.0191890089775023 0 0.452219283767792 0.00174168586409873  
 0.233708918022843 0 0.0196050341623689 0 0.0610215332319822 0  
 0.00474377733296307 0.001 0.440710704852047 0.906820812713582  
 TCGA-FD-A62N-01A-11R-A30C-07 0.0437112757608249 0 0.0497170173184656  
 0.240785723897982 0 0.104529679393681 0.0918913984887927  
 0.0203018733287642 0.0208592749558748 0 0 0.010407084213576  
 0.00633262840985112 0.0561081303025047 0.139917028028636  
 0.113046602165191 0.0422114898539635 0 0.0565673507602677 0 0  
 0.00361344312162479 0.04 0.175936019085028 1.0169997802254



TCGA-BT-A20J-01A-11R-A14Y-07 0.0337870027743535 0 0 0.196715715085887  
0 0.170430887258596 0.0196416708100716 0.0523249998010867  
0.0183303898709537 0 0 0.0385013249427453 0 0.1256742369756  
0.147360252036138 0.125919620780541 0.0256326599176895 0  
0.0450061354369801 0 0 0.000675104309358272 0.12 0.0993109002544971  
1.05979472637657

TCGA-DK-AA71-01A-31R-A39I-07 0.00976622993144734 0 0.0101170128133029  
0.265764964351522 0 0 0.117224665811421 0.04983406844335 0 0  
0 0.036572051326745 0.00895846842713489 0.163033435467254  
0.115250928607612 0.152677002733573 0 0.00665124408008568  
0.0616950196678695 0 0.00245490833868299 0 0.652 -  
0.00339105497283978 1.09306187009822

TCGA-KQ-A41O-01A-12R-A352-07 0 0 0.0592345248695506 0.617910694040137  
0 0 0 0 0 0 0.0472727231653827 0.00786322604552785  
0.00688611789136776 0 0 0.141116139580796 0 0.119716574407238 0  
0 0 0 0.432 0.0236357067964657 1.13865103120796

TCGA-BL-A13I-01A-11R-A277-07 0.0108627106644693 0 0 0.0549477507391666  
0 0.131331310598263 0.0122808243839176 0.00211132215736146  
0.0296854384377377 0 0.018824691973884 0 0.0245717725837851  
0.0931464523271626 0.0273660138574892 0.513254931618954  
0.00402010329956028 0 0.062183505143191 0.0106228398271322 0  
0.00479033238792571 0.001 0.514709625314418 0.858242942608196

TCGA-E7-A677-01A-11R-A30C-07 0 0.0388844363475488 0.000316370303426455  
0.162347791277481 0 0 0.0417837349063442 0.0206025921591807  
0.152103773082343 0 0 0.013295640829284 0.0172135376645868  
0.064236340068549 0.0410335650892492 0.00311346572294158  
0.174952400625058 0.136810394503113 0.133305957420895 0 0 0  
0.152 0.0831407047173899 1.04599812384309

TCGA-DK-A1A5-01A-11R-A13Y-07 0 0.0233844985945651 0 0.150871941806356  
0 0.0381306477521582 0.0715834052149643 0.0864988894244792  
0.00251843573308823 0 0 0.00480602149767609 0 0.273856063925052  
0.0412342979578441 0.0806526861467712 0.113128433882004  
0.085206783196778 0.0281278948682636 0 0 0 0.039  
0.178051708230217 1.01757758507698

TCGA-HQ-A5NE-01A-12R-A28M-07 0.00682269679884298 0  
0.00347652040359356 0.0447750392339343 0 0.118021850040928  
0.00916220748094409 0.0853771759749588 0 0 0.0890964842721342 0 0  
0.243381380227714 0.0067485354954355 0.0331510610932818 0  
0.190651271725577 0 0.168918751390504 0.000417025862153186 0  
0.075 0.133769413622754 1.04889875619341

TCGA-XF-AAMT-01A-11R-A42T-07 0.00278762800662785 0.0249123749483024  
0.00614853284282479 0.0291996392607976 0 0.0881204654456576 0 0  
0.0346553288774439 0 0 0.0125134581588934 0 0.337285957960386  
0.00905304102180179 0.342142336005159 0 0.00943693907187828

0.0901293653665266 0 0 0.0136149330337009 0.004 0.32907405594569  
 0.963325114166686  
 TCGA-XF-A9SU-01A-31R-A39I-07 0.232175807633593 0 0.181726989253318  
 0.104176330066787 0 0.00280246352145362 0.0216734699551 0  
 0.0266510383104051 0.0192768141797633 0 7.08096058937193e-05  
 0.00854009410116047 0.0765222670996604 0.149149509198168  
 0.118958281517901 0 0 0.0540041804782198 0 0  
 0.00427194507857713 0.001 0.448866477631434 0.897592856681285  
 TCGA-CF-A47S-01A-11R-A23W-07 0 0.0102334164687135 0.031142241476521  
 0.11844746204936 0 0.108845064832647 0 0.0275802062986399  
 0.151249509151104 0 0 0.0403337354893641 0.031030323032101  
 0.0320669434162043 0.109661553475088 0 0.0940518715041378  
 0.179494806719419 0 0.0584401520032657 0.00742271408343469 0 0.087  
 0.123223653798689 1.05349971830474  
 TCGA-FD-A6TK-01A-42R-A33J-07 0.026943360808309 0 0.029806609836151  
 0.172652692457422 0 0.084279856624323 0.177146640103895  
 0.035298431626289 0.0041758470618738 0 0.00873807753661083  
 0.00306823719859881 0.00298544106720792 0.040125558016896  
 0.1150461019971 0.176671660025393 0.0255148928289508 0.0209933137814902  
 0.0728864359275403 0 0 0.00366684310194977 0.023 0.206309323330908  
 0.99717167752463  
 TCGA-E7-A5KF-01A-11R-A28M-07 0 0.0408807879506569 0.0114016469924738  
 0.0487599068650172 0 0.238715421761961 0 0 0.0857048038498363 0  
 0.073412998676592 0 0.00748395644857985 0.0225810595113857 0  
 0.138490557362439 0 0.237614974107441 0 0.0711196857541815  
 0.0116524153764721 0.012181785342964 0.731 -0.0105954566701421  
 1.09633601974269  
 TCGA-UY-A78L-01A-12R-A33J-07 0 0.00676279522813653 0.010409886220192  
 0.0479526301730612 0 0.125435913278646 0 0.0445924642106138  
 0.0157719960178247 0 0 0.0340458365069959 0 0.300103803236259  
 0.0417495551371301 0.179949960833527 0.0355340236380224  
 0.0466286360741627 0.0132382438282853 0 0 0.0978242556171434 0.158  
 0.0813774787080326 1.07251499497156  
 TCGA-S5-A6DX-01A-11R-A31N-07 0.156656160739179 0 0.16020466413609  
 0.168033097758523 0 0 0.0901786344134724 0.00970385999199624  
 0.0264358775474213 0 0 0.0240005540360726 0.0107003112430889  
 0.0602978097894422 0.110811412700591 0.0759689726914139  
 0.0307014349890238 0 0.0716769288905434 0 0 0.00463028107314317  
 0.005 0.322598277624526 0.956423584585339  
 TCGA-XF-A8HI-01A-11R-A38B-07 0 0.036051570839607 0.0156028087089168  
 0.0745121348817361 0 0.27528327485288 0.0151948153385283  
 0.0159446086253825 0.0941155126969497 0 0.0180857747307224 0 0  
 0.0541731807202232 0 0.102697837439848 0.0310625710148516  
 0.138527640558859 0 0.11936117333051 0 0.00938709626098479 0.183

0.073649213282177 1.06064180432259  
 TCGA-XF-A9T5-01A-11R-A42T-07 0.113315265102751 0 0.0878623607032397  
 0.140446527587899 0 0.103186560393084 0.0690672032171883  
 0.0445963558642811 0.0265473663032053 0 0.00672454839375686 0 0  
 0.150419847584349 0.0920585454693315 0.092850856262386  
 0.0480123210000317 0 0.0219514090709869 0 0 0.0029608330475103  
 0.002 0.385482669996303 0.922584462646793  
 TCGA-XF-A9SX-01A-21R-A39I-07 0.0561496868759974 0 0.00233917128103756  
 0.130740843934083 0 0.155167340885767 0.0779604919492951  
 0.0418996850328389 0.0503844394005139 0 0 0.0577385695777963 0  
 0.0630807745055708 0.0791227908636856 0.189781599395182  
 0.00671085461212039 0.0164100081312912 0.0702959283253913 0 0  
 0.00221781522943071 0.006000000000000001 0.301266331513215  
 0.960106294986755  
 TCGA-G2-A2EK-01A-22R-A18C-07 0.0890229091422189 0.107269506896099  
 0.013283272365564 0.0642843295309573 0 0.252441751758382  
 0.00602773844485814 0 0.104491172757864 0 0 0.0494293586777466  
 0.00779139071409915 0.0562130156581977 0 0.0452798102245656  
 0.0497102202776093 0.0749350876662455 0.0798204358855926 0 0 0  
 0.01 0.247373273757645 0.985825307489333  
 TCGA-XF-A8HD-01A-11R-A36F-07 0.206566392253794 0 0.0506419743591235  
 0.205925695508715 0 0.00888104191263834 0.0807967154781553  
 0.0533284034192047 0.00544220234189783 0 0.00511750299044132  
 0.072355616419944 0.0121062834051938 0.00920776286709741  
 0.0345596908323622 0.053389404028466 0 0.130984104967535  
 0.0661508134907214 0 0 0.00454639572471018 0.001 0.474563689195831  
 0.879608851466445  
 TCGA-GV-A3JX-01A-11R-A20F-07 0.096788121038545 0 0.0164563727144362  
 0.14666004459527 0 0.134557616930852 0.0364148338358011  
 0.0892566375925563 0.0171753919568117 0.0119071062678309  
 0.0291851642681237 0 0 0.0566530489711308 0.0965110454575792  
 0.205435379958797 0.0206247757466795 0.0173871655173352  
 0.024987295148252 0 0 0 0.012 0.243971292557035  
 0.985595192396582  
 TCGA-H4-A2HQ-01A-11R-A180-07 0.00300843532719338 0.00800103100146493  
 0.0869180678679968 0 0.216603447770348 0.0304170324029233  
 0.119461991495812 0 0 0.0393095522977675 0 0.0101685361451769 0  
 0.15146752751598 0.104574868082463 0.0825116093379901  
 0.142487952521078 0.00506994823380556 0 0 0 0.244  
 0.0554571000930441 1.08958854184822  
 TCGA-XF-A9SP-01A-11R-A39I-07 0.205852921291759 0 0.119894529331831  
 0.137894465312317 0 0.0251047740649511 0 0.0176871913301762  
 0.0137428182666243 0.00242498823131804 0 0.0467572677976099  
 0.00427432441431933 0.0154269224339194 0.0536011040655501

|                              |                    |                    |                     |                    |       |   |
|------------------------------|--------------------|--------------------|---------------------|--------------------|-------|---|
| 0.25830391478523             | 0                  | 0.0158858540248175 | 0.0831489246495778  | 0                  | 0     | 0 |
| 0.001                        | 0.413895841112972  | 0.910469310356232  |                     |                    |       |   |
| TCGA-DK-A3IK-01A-32R-A21D-07 | 0                  | 0.189685954103041  | 0.0764486230251883  |                    |       |   |
| 0.12397310586603             | 0                  | 0.0530960303469752 | 0                   | 0.0584678835759138 | 0     |   |
| 0.0168676966969602           | 0                  | 0.0364585222661032 | 0.00327463514770142 |                    |       |   |
| 0.18398653312977             | 0.114759097704471  | 0.0879761462573835 | 0                   |                    |       |   |
| 0.0169861655162569           | 0.0380196063642061 | 0                  | 0                   | 0                  | 0.016 |   |
| 0.234644269147471            | 0.994790728287916  |                    |                     |                    |       |   |
