# Supplementary material for: Ferroptosis‐Related Long Noncoding RNAs Have Excellent Predictive Ability for Multiomic Characteristics of Bladder Cancer
Source: Hindawi journal article supplement (doi:10.1155/2022/9316847), 2022-01-01
Supplement: f1 [file 9316847.f1.zip]

| Ferroptosis | lncRNA      | cor               | pvalue               | Regulation |
|-------------|-------------|-------------------|----------------------|------------|
| IREB2       | AC092802.3  | 0.514996679937929 | 3.23676273223084e-29 | postive    |
| IREB2       | AC009095.1  | 0.566070129117645 | 3.40344560752245e-36 | postive    |
| IREB2       | TXNDC12-AS1 | 0.525928121492263 | 1.30323221493306e-30 | postive    |
| IREB2       | AL450998.3  | 0.551351674465339 | 4.64550462574244e-34 | postive    |
| CRYAB       | AC079313.2  | 0.570135866137488 | 8.37653473930232e-37 | postive    |
| RPL8        | ZFAS1       | 0.581461107724884 | 1.51946023312867e-38 | postive    |
| CRYAB       | AC027449.1  | 0.56148244949498  | 1.61765851746639e-35 | postive    |
| ZEB1        | AL035530.2  | 0.511438828651977 | 8.98220511589738e-29 | postive    |
| SLC7A11     | AC004846.2  | 0.506495920085327 | 3.63606996998749e-28 | postive    |
| ZEB1        | AC018752.1  | 0.572166450223707 | 4.12855832148133e-37 | postive    |
| IREB2       | AC018752.1  | 0.616131728121857 | 2.53040163994096e-44 | postive    |
| IREB2       | MIRLET7A1HG | 0.507133188503864 | 3.04016814905431e-28 | postive    |
| CRYAB       | MIR100HG    | 0.546844940996223 | 1.99457377066346e-33 | postive    |
| ZEB1        | MIR100HG    | 0.587030001601883 | 1.99599628714535e-39 | postive    |
| IREB2       | AC073487.1  | 0.529282489063559 | 4.74986722263781e-31 | postive    |
| PHKG2       | AP001160.1  | 0.584683297075321 | 4.71742641781347e-39 | postive    |
| IREB2       | SSBP3-AS1   | 0.520356042783259 | 6.7991893127737e-30  | postive    |
| CRYAB       | AL139220.2  | 0.505840727367863 | 4.36900954631568e-28 | postive    |
| ZEB1        | AL137779.1  | 0.582314506282273 | 1.11609161580677e-38 | postive    |
| SLC7A11     | AC069277.1  | 0.602300003075678 | 6.21433786200243e-42 | postive    |
| ZEB1        | AC069277.1  | 0.510679165511573 | 1.1152073788788e-28  | postive    |
| ZEB1        | AP001189.3  | 0.514284158439067 | 3.97467853498819e-29 | postive    |
| IREB2       | AC011405.1  | 0.509243796878104 | 1.67599418487964e-28 | postive    |
| SLC7A11     | AL356124.1  | 0.504714613345113 | 5.98484036868526e-28 | postive    |
| ZEB1        | AL356124.1  | 0.563588512098145 | 7.93272619087793e-36 | postive    |
| ZEB1        | FO680682.1  | 0.514866932130793 | 3.36022176014369e-29 | postive    |
| IREB2       | FO680682.1  | 0.511483470121567 | 8.86856468482854e-29 | postive    |
| FANCD2      | THUMPD3-AS1 | 0.508503679936615 | 2.06618224593252e-28 | postive    |
| RPL8        | GAS5        | 0.521632556286845 | 4.66948055583239e-30 | postive    |
| IREB2       | AC073529.1  | 0.520049601734285 | 7.4392581684651e-30  | postive    |
| SLC7A11     | OSMR-AS1    | 0.543755820614797 | 5.3469718253479e-33  | postive    |
| ZEB1        | OSMR-AS1    | 0.521357888290094 | 5.06337724218617e-30 | postive    |
| SLC7A11     | AL162724.2  | 0.667817898621479 | 2.09259648843551e-54 | postive    |
| ZEB1        | AL162724.2  | 0.692114835576307 | 6.98065037612683e-60 | postive    |
| IREB2       | AL162727.2  | 0.501743066803539 | 1.36540999177793e-27 | postive    |
| CRYAB       | AC053503.3  | 0.588298547149006 | 1.25015565026792e-39 | postive    |
| PHKG2       | AC009065.5  | 0.52741171992004  | 8.35125606529916e-31 | postive    |
| ZEB1        | BNC2-AS1    | 0.508749406195601 | 1.92759076246913e-28 | postive    |
| IREB2       | AC078778.1  | 0.544430527673557 | 4.31468425827825e-33 | postive    |
| ZEB1        | AC087286.2  | 0.596829448158394 | 5.09217819887294e-41 | postive    |
| IREB2       | AC087286.2  | 0.517127139287246 | 1.74650067336383e-29 | postive    |
| IREB2       | AL031670.1  | 0.51720932656162  | 1.70527481876534e-29 | postive    |
| ZEB1        | AC022893.1  | 0.556804786832552 | 7.73329487146157e-35 | postive    |

|         |              |                   |                       |          |
|---------|--------------|-------------------|-----------------------|----------|
| IREB2   | AC022154.1   | 0.520118307160932 | 7.29076092400476e-30  | positive |
| MT1G    | AC011472.4   | 0.858987947396005 | 5.64170781263485e-121 | positive |
| IREB2   | AP001107.1   | 0.519829589110702 | 7.93519635689315e-30  | positive |
| CRYAB   | MIR497HG     | 0.520235557909693 | 7.04407850034961e-30  | positive |
| SLC7A11 | MAP3K20-AS1  | 0.598997827228621 | 2.2228742582285e-41   | positive |
| ZEB1    | MAP3K20-AS1  | 0.607854017459874 | 7.04255910190464e-43  | positive |
| SLC7A11 | ENTPD1-AS1   | 0.599268628715474 | 2.00338399186721e-41  | positive |
| ZEB1    | ENTPD1-AS1   | 0.687166114325665 | 1.00699425650768e-58  | positive |
| IREB2   | ENTPD1-AS1   | 0.573923476155975 | 2.2294503963298e-37   | positive |
| ZEB1    | ARAP1-AS2    | 0.515151162232154 | 3.09560483395037e-29  | positive |
| IREB2   | ARAP1-AS2    | 0.516780318031138 | 1.93159650078062e-29  | positive |
| PHKG2   | AL589765.6   | 0.534541911202692 | 9.53812077711172e-32  | positive |
| SLC7A11 | RBMS3-AS3    | 0.727703763217616 | 5.7730778619658e-69   | positive |
| ZEB1    | RBMS3-AS3    | 0.693544100956199 | 3.19702114332052e-60  | positive |
| PHKG2   | AL390719.2   | 0.515367315279742 | 2.90825658039358e-29  | positive |
| IREB2   | AP001619.1   | 0.524864363249469 | 1.79066104105623e-30  | positive |
| IREB2   | AC092171.1   | 0.526854521728254 | 9.87302901789391e-31  | positive |
| ZEB1    | AC129507.1   | 0.513058434884181 | 5.65253287418949e-29  | positive |
| PHKG2   | AC005387.1   | 0.526038708825187 | 1.26080616023409e-30  | positive |
| IREB2   | AP005899.1   | 0.50262974368818  | 1.06842540706056e-27  | positive |
| RPL8    | EPB41L4A-AS1 | 0.50516541398807  | 5.27718841122082e-28  | positive |
| IREB2   | AL157871.5   | 0.541134724634932 | 1.22466685121887e-32  | positive |
| IREB2   | AC108449.2   | 0.654639400471509 | 1.20236379682901e-51  | positive |
| ZEB1    | SH3RF3-AS1   | 0.647770784414144 | 2.91156588302921e-50  | positive |
| SLC7A11 | AP003171.1   | 0.62294175397505  | 1.52121745907451e-45  | positive |
| ZEB1    | AP003171.1   | 0.610774539959886 | 2.20259798910587e-43  | positive |
| PHKG2   | AC005785.1   | 0.541415667739465 | 1.12096468707455e-32  | positive |
| SLC7A11 | LSAMP-AS1    | 0.644561413171571 | 1.25508836688321e-49  | positive |
| ZEB1    | LSAMP-AS1    | 0.561750119559223 | 1.47801262473437e-35  | positive |
| ZEB1    | CARMN        | 0.511128103506276 | 9.81406977607493e-29  | positive |
| PHKG2   | AC020765.2   | 0.576991749252603 | 7.53364540011367e-38  | positive |
| SLC7A11 | GRK5-IT1     | 0.596927844704096 | 4.904868073402e-41    | positive |
| ZEB1    | GRK5-IT1     | 0.645767802346476 | 7.26181722264635e-50  | positive |
| IREB2   | AC024270.4   | 0.505339767832745 | 5.02625019720257e-28  | positive |
| PHKG2   | AC010422.2   | 0.52139577367788  | 5.0071534427329e-30   | positive |
| CRYAB   | AC002398.2   | 0.603680937347446 | 3.63078593763855e-42  | positive |
| CRYAB   | HAND2-AS1    | 0.581163658265402 | 1.69160221896282e-38  | positive |
| ZEB1    | HAND2-AS1    | 0.522338505439175 | 3.79073467315356e-30  | positive |
| PHKG2   | AC109460.3   | 0.555430704258449 | 1.21878734489862e-34  | positive |
| IREB2   | AC008750.5   | 0.527447928017279 | 8.26081706680097e-31  | positive |
| IREB2   | AC012557.1   | 0.535820811389007 | 6.42789068803632e-32  | positive |
| ZEB1    | AL136084.3   | 0.528489316875444 | 6.03633194923843e-31  | positive |
| ZEB1    | AC058791.1   | 0.566037297930631 | 3.44192252256772e-36  | positive |
| IREB2   | AC058791.1   | 0.507803463835571 | 2.51744568080328e-28  | positive |

|         |              |                   |                      |         |
|---------|--------------|-------------------|----------------------|---------|
| IREB2   | AC005070.3   | 0.516018408997787 | 2.40905414977216e-29 | postive |
| CRYAB   | AC036108.3   | 0.504929563939587 | 5.63643536152825e-28 | postive |
| ZEB1    | AC036108.3   | 0.636979043009626 | 3.69831322972052e-48 | postive |
| IREB2   | AL731566.2   | 0.560890196928382 | 1.97476028504693e-35 | postive |
| IREB2   | AC024075.1   | 0.590374527184449 | 5.78754193544695e-40 | postive |
| ALOX5   | AL731567.1   | 0.63524428713245  | 7.91414507321002e-48 | postive |
| SLC7A11 | AC006160.1   | 0.502287024993809 | 1.17477000291339e-27 | postive |
| ZEB1    | AC006160.1   | 0.543874853742903 | 5.14858561316547e-33 | postive |
| CRYAB   | GATA6-AS1    | 0.510587386878249 | 1.14470338947339e-28 | postive |
| CRYAB   | MIR1-1HG-AS1 | 0.587941517212129 | 1.42640785339066e-39 | postive |
| IREB2   | AP001001.1   | 0.510468119969883 | 1.18418830997237e-28 | postive |
| ZEB1    | AC090825.1   | 0.628302271424087 | 1.58375645109789e-46 | postive |
| IREB2   | AC025031.2   | 0.509814783826894 | 1.42559374183938e-28 | postive |
| IREB2   | CRTC3-AS1    | 0.522726012074527 | 3.38011499152252e-30 | postive |
| IREB2   | DCUN1D2-AS   | 0.531320592247346 | 2.55827959525874e-31 | postive |
| IREB2   | AC006059.1   | 0.514386358019161 | 3.85941880134442e-29 | postive |
| SLC7A11 | AP003900.1   | 0.740328812298131 | 1.52856566004516e-72 | postive |
| ZEB1    | AP003900.1   | 0.638291164747833 | 2.07342177214655e-48 | postive |
| IREB2   | AC004837.2   | 0.520050611081341 | 7.43705511083487e-30 | postive |
| ZEB1    | AC087854.1   | 0.647372687125115 | 3.49343694930371e-50 | postive |
| SLC7A11 | AC040904.1   | 0.601188520687089 | 9.55925543884065e-42 | postive |
| ZEB1    | AC040904.1   | 0.616629294703422 | 2.06532728098601e-44 | postive |
| IREB2   | AC008434.1   | 0.525126332263424 | 1.65605897372659e-30 | postive |
| IREB2   | AP001469.2   | 0.534240677717029 | 1.04647025903879e-31 | postive |
| SLC7A11 | AC011510.1   | 0.656902911911327 | 4.13012048748929e-52 | postive |
| ZEB1    | AC011510.1   | 0.714089493829776 | 2.51164527220307e-65 | postive |
| ZEB1    | AC012568.1   | 0.513658334110688 | 4.7584711591164e-29  | postive |
| SLC7A11 | MKNK1-AS1    | 0.56068149561942  | 2.11835737589524e-35 | postive |
| ZEB1    | MKNK1-AS1    | 0.596580751769157 | 5.59779090459247e-41 | postive |
| IREB2   | MKNK1-AS1    | 0.511743280224186 | 8.23483865051672e-29 | postive |
| SLC7A11 | C1QTNF7-AS1  | 0.708454138827872 | 6.9886911756454e-64  | postive |
| ZEB1    | C1QTNF7-AS1  | 0.680699151286549 | 3.04269441366441e-57 | postive |
| CRYAB   | ADAMTS9-AS1  | 0.543156158385372 | 6.46737962031974e-33 | postive |
| ZEB1    | ADAMTS9-AS1  | 0.594323176871942 | 1.3170191795135e-40  | postive |
| IREB2   | AL513327.1   | 0.528445027057914 | 6.1175478880072e-31  | postive |
| CRYAB   | AF001548.1   | 0.51361815323986  | 4.81371644858716e-29 | postive |
| ZEB1    | AF001548.1   | 0.528936386765605 | 5.27394815552647e-31 | postive |
| CRYAB   | LINC02489    | 0.57238084607086  | 3.83028835277619e-37 | postive |
| CRYAB   | MBNL1-AS1    | 0.629978579634274 | 7.73549084964145e-47 | postive |
| ZEB1    | MBNL1-AS1    | 0.51056487453286  | 1.15205542684059e-28 | postive |
| IREB2   | AC004918.5   | 0.538359774379022 | 2.92164520723038e-32 | postive |
| SLC7A11 | HMGA2-AS1    | 0.665456305246385 | 6.69159575630218e-54 | postive |
| ZEB1    | HMGA2-AS1    | 0.731492043925333 | 5.12178399952815e-70 | postive |
| SLC7A11 | AL445649.1   | 0.55931553581628  | 3.34959362038961e-35 | postive |

|         |                           |                      |                      |         |
|---------|---------------------------|----------------------|----------------------|---------|
| ZEB1    | AL445649.1                | 0.560451787123989    | 2.28837733855075e-35 | postive |
| SLC7A11 | AL355102.1                | 0.719932581557199    | 7.32537662987304e-67 | postive |
| ZEB1    | AL355102.1                | 0.685424726933044    | 2.54337354448034e-58 | postive |
| CRYAB   | AC005180.1                | 0.599809682788969    | 1.62714190454447e-41 | postive |
| PHKG2   | LINC00685                 | 0.508448210482053    | 2.09880485433035e-28 | postive |
| PHKG2   | AL513320.1                | 0.509186849381521    | 1.70323394620711e-28 | postive |
| ZEB1    | AC079313.1                | 0.630659723032694    | 5.77417851174903e-47 | postive |
| SLC7A11 | GNG12-AS1                 | 0.641780095565673    | 4.38997264811042e-49 | postive |
| ZEB1    | GNG12-AS1                 | 0.704943831854402    | 5.33109629011516e-63 | postive |
| PHKG2   | AC145285.6                | 0.544307414143491    | 4.4870758771485e-33  | postive |
| IREB2   | AC008870.4                | 0.568413970434603    | 1.5203870570839e-36  | postive |
| IREB2   | AC139887.2                | 0.586445298936709    | 2.47466549161178e-39 | postive |
| IREB2   | AC244093.5                | 0.569136426196899    | 1.18445109933809e-36 | postive |
| ZEB1    | AC004637.1                | 0.51510370845891     | 3.13830540807446e-29 | postive |
| IREB2   | AC008635.2                | 0.505723381369255    | 4.5149014500813e-28  | postive |
| PHKG2   | AC139530.1                | 0.505880968451147    | 4.32005996078104e-28 | postive |
| IREB2   | AC020978.1                | 0.509619405765947    | 1.50680729357446e-28 | postive |
| PHKG2   | AC127024.6                | 0.506399805036631    | 3.7354442186672e-28  | postive |
| SLC7A11 | STARD13-AS                | 0.664617148001256    | 1.00880668419282e-53 | postive |
| ZEB1    | STARD13-AS                | 0.679228528946074    | 6.52461355061268e-57 | postive |
| IREB2   | AC015849.4                | 0.500961940448071    | 1.69373019265911e-27 | postive |
| PHKG2   | AC093249.2                | 0.530666345893534    | 3.12185186752346e-31 | postive |
| IREB2   | DHDDS-AS1                 | 0.508212414486642    | 2.24325675551828e-28 | postive |
| ZEB1    | MSC-AS1                   | 0.501276544591963    | 1.55304035749656e-27 | postive |
| IREB2   | FMR1-IT1                  | 0.50376386793703     | 7.79909249629906e-28 | postive |
| ZEB1    | AC025280.1                | 0.559004228390466    | 3.71718850156092e-35 | postive |
| IREB2   | AC024267.6                | 0.560842595849766    | 2.00663941565375e-35 | postive |
| IREB2   | AC010976.1                | 0.518494781409538    | 1.1726415370045e-29  | postive |
| IREB2   | UBL7-AS1                  | 0.604830920490462    | 2.31616108282458e-42 | postive |
| IREB2   | Z98885.30.555312732362391 | 1.26720538547407e-34 | postive              |         |
| ZEB1    | AC026356.1                | 0.544170969711357    | 4.6861041944446e-33  | postive |
| GSS     | AL121906.1                | 0.612653493134758    | 1.03605093677095e-43 | postive |
| ZEB1    | LINC-PINT                 | 0.55699376996821     | 7.26308289840581e-35 | postive |
| SLC7A11 | AC023825.2                | 0.651418065079583    | 5.41553441878165e-51 | postive |
| ZEB1    | AC023825.2                | 0.661300769508514    | 5.04360575932237e-53 | postive |
| CRYAB   | AC005180.2                | 0.617975527823259    | 1.19003164369308e-44 | postive |
| IREB2   | AC023024.1                | 0.506154770198499    | 4.00109517491808e-28 | postive |
| ZEB1    | AC104984.6                | 0.521248927162184    | 5.22858379482635e-30 | postive |
| IREB2   | AC104984.6                | 0.510697440208495    | 1.10942453587123e-28 | postive |
| PHKG2   | MIR762HG                  | 0.549955570311959    | 7.31299483360482e-34 | postive |
| IREB2   | AC011442.1                | 0.530293628615577    | 3.49611667825448e-31 | postive |
| IREB2   | AL021368.2                | 0.500814790912538    | 1.76378727021579e-27 | postive |
| ZEB1    | COL4A2-AS1                | 0.515471066118748    | 2.82235744746922e-29 | postive |
| IREB2   | AC138393.3                | 0.556369572424924    | 8.93384344146052e-35 | postive |

|         |            |                   |                      |          |
|---------|------------|-------------------|----------------------|----------|
| IREB2   | AC007619.1 | 0.500786398545708 | 1.77763055276272e-27 | positive |
| IREB2   | AL354993.2 | 0.531649214392237 | 2.31444367371985e-31 | positive |
| PHKG2   | AC034236.2 | 0.516604715826636 | 2.03257944198433e-29 | positive |
| ZEB1    | AC019183.1 | 0.515507823054798 | 2.79253070417476e-29 | positive |
| ZEB1    | AL031429.2 | 0.635008511860966 | 8.77296960790041e-48 | positive |
| ZEB1    | AC131097.3 | 0.52340265430146  | 2.76588408178455e-30 | positive |
| CRYAB   | LINC01081  | 0.573237919374404 | 2.83662542659264e-37 | positive |
| ZEB1    | LINC01081  | 0.518284387367797 | 1.24689722569084e-29 | positive |
| IREB2   | AL513327.2 | 0.517754808882734 | 1.45501456049435e-29 | positive |
| PHKG2   | AP003419.3 | 0.525149956671868 | 1.64442416170682e-30 | positive |
| IREB2   | OPA1-AS1   | 0.541208310621667 | 1.19662128483757e-32 | positive |
| IREB2   | AC007365.1 | 0.513708689734032 | 4.69012060473802e-29 | positive |
| IREB2   | LINC00630  | 0.621841420827797 | 2.40720316183439e-45 | positive |
| ZEB1    | AL161719.1 | 0.508572729946119 | 2.02627211765257e-28 | positive |
| IREB2   | AP001432.1 | 0.524257421463637 | 2.14549828309505e-30 | positive |
| SLC7A11 | AC009716.1 | 0.591441574955165 | 3.88717898530262e-40 | positive |
| ZEB1    | AC009716.1 | 0.597389517681149 | 4.11324556175895e-41 | positive |
| IREB2   | AC068790.3 | 0.501028613136517 | 1.66289970127895e-27 | positive |
| SLC7A11 | AC037487.2 | 0.548060363667903 | 1.34936395475255e-33 | positive |
| ZEB1    | AC037487.2 | 0.601870791440043 | 7.34015503979304e-42 | positive |
| IREB2   | AC037487.2 | 0.514641696979534 | 3.58569025188727e-29 | positive |
| ZEB1    | AL117336.1 | 0.512161948689094 | 7.30653261764982e-29 | positive |
| IREB2   | LINC00641  | 0.555965924975813 | 1.02113665993015e-34 | positive |
| NOX1    | AC015908.2 | 0.52095110682794  | 5.70782341828083e-30 | positive |
| IREB2   | ITFG1-AS1  | 0.509925679746219 | 1.38143799913588e-28 | positive |
| IREB2   | AC138932.6 | 0.505595403209815 | 4.67950342315483e-28 | positive |
| IREB2   | AC127024.4 | 0.532935708061411 | 1.56202457410381e-31 | positive |
| IREB2   | AL359220.1 | 0.504003687647556 | 7.29578743340945e-28 | positive |
| CRYAB   | ACTA2-AS1  | 0.5463225673272   | 2.35820401155613e-33 | positive |
| ZEB1    | ACTA2-AS1  | 0.609404991837854 | 3.80458191198202e-43 | positive |
| IREB2   | AC138956.2 | 0.577655479910574 | 5.9486903998723e-38  | positive |
| IREB2   | AC024075.3 | 0.551224535365107 | 4.84191508399778e-34 | positive |
| IREB2   | AL354726.1 | 0.543469569454151 | 5.85555176841237e-33 | positive |
| ZEB1    | AC067852.3 | 0.535557870301662 | 6.97215168340689e-32 | positive |
| IREB2   | AC067852.3 | 0.562962840837623 | 9.8082102067088e-36  | positive |
| MT1G    | HID1-AS1   | 0.549201432123882 | 9.33594689979105e-34 | positive |
| PHKG2   | AC008764.6 | 0.519115188696343 | 9.78197197937109e-30 | positive |
| ZEB1    | AC104170.1 | 0.521579086716174 | 4.74370807224964e-30 | positive |
| IREB2   | AC068790.2 | 0.516038963778074 | 2.39475855340771e-29 | positive |
| ZEB1    | PRR34      | 0.539544074004835 | 2.0178977781524e-32  | positive |
| SLC7A11 | AL139383.1 | 0.629859260929303 | 8.14145504945276e-47 | positive |
| ZEB1    | AL139383.1 | 0.605890890225655 | 1.52796465848392e-42 | positive |
| ZEB1    | AC090559.1 | 0.623784192183903 | 1.06917532781007e-45 | positive |
| IREB2   | AC022973.4 | 0.521850243635384 | 4.3789557516321e-30  | positive |

|         |             |                   |                      |         |
|---------|-------------|-------------------|----------------------|---------|
| ZEB1    | AC136604.2  | 0.517898797581333 | 1.3952504518927e-29  | postive |
| ZEB1    | AL353804.1  | 0.558676598912649 | 4.14721555893249e-35 | postive |
| IREB2   | AL353804.1  | 0.566649114766526 | 2.79080148552109e-36 | postive |
| KEAP1   | AC114271.1  | 0.54049728807003  | 1.49647512750693e-32 | postive |
| IREB2   | WASHC5-AS1  | 0.536160916563647 | 5.78582521530069e-32 | postive |
| IREB2   | PABPC4-AS1  | 0.535402586100125 | 7.31472998129075e-32 | postive |
| IREB2   | LINC01409   | 0.524208189856718 | 2.17715776322503e-30 | postive |
| PHKG2   | H1FX-AS1    | 0.532925235920849 | 1.56704261540879e-31 | postive |
| SLC7A11 | AC079921.2  | 0.607798526760218 | 7.1989819089003e-43  | postive |
| ZEB1    | AC079921.2  | 0.69528051837826  | 1.23034638618192e-60 | postive |
| ZEB1    | AL355073.2  | 0.551196058611977 | 4.88702149589548e-34 | postive |
| SLC7A11 | KLF7-IT1    | 0.536060481977981 | 5.9685256275904e-32  | postive |
| ZEB1    | KLF7-IT1    | 0.605464409788658 | 1.80668256778447e-42 | postive |
| IREB2   | KLF7-IT1    | 0.50386461795635  | 7.5836024011975e-28  | postive |
| ZEB1    | AL133371.2  | 0.613788602862051 | 6.55287473439159e-44 | postive |
| IREB2   | NCBP2-AS1   | 0.520470994418214 | 6.57340037106462e-30 | postive |
| ZEB1    | AC108463.2  | 0.683576011587883 | 6.75328567025664e-58 | postive |
| ZEB1    | SDCBP2-AS1  | 0.501236398930216 | 1.57032947283381e-27 | postive |
| IREB2   | SDCBP2-AS1  | 0.536340861873325 | 5.47221736063827e-32 | postive |
| SLC7A11 | ANKRD44-IT1 | 0.681784164190439 | 1.7281499996435e-57  | postive |
| ZEB1    | ANKRD44-IT1 | 0.678113803446489 | 1.15981128370357e-56 | postive |
| IREB2   | MCM3AP-AS1  | 0.519892392063794 | 7.79038842264731e-30 | postive |
| IREB2   | AP000766.1  | 0.508621915192748 | 1.99830918837018e-28 | postive |
| CRYAB   | AP003071.4  | 0.616208119693328 | 2.45277792832381e-44 | postive |
| IREB2   | AC007622.2  | 0.567615311610663 | 2.00224931090339e-36 | postive |
| IREB2   | AC004884.2  | 0.504788495335934 | 5.86275198573319e-28 | postive |
| ACO1    | AC061992.2  | 0.604683209093976 | 2.45408784520264e-42 | postive |
| IREB2   | AC234775.3  | 0.532477837952718 | 1.79699045915963e-31 | postive |
| IREB2   | AC078795.1  | 0.562754321660871 | 1.0525993552824e-35  | postive |
| IREB2   | AC007390.1  | 0.506980069842827 | 3.17387703581955e-28 | postive |
| IREB2   | AL139021.3  | 0.511022934776216 | 1.01125234891255e-28 | postive |
| IREB2   | LAMTOR5-AS1 | 0.528911647371952 | 5.31352748878549e-31 | postive |
| ZEB1    | AC087286.1  | 0.57732226047949  | 6.69810308743551e-38 | postive |
| IREB2   | AC087286.1  | 0.519454930990708 | 8.85603754345297e-30 | postive |
| PHKG2   | AC012645.4  | 0.517158475513143 | 1.73066720790664e-29 | postive |
| ZEB1    | AC110609.1  | 0.533932321271251 | 1.15053850622045e-31 | postive |
| SLC7A11 | AC069549.1  | 0.626541115020574 | 3.3465470770133e-46  | postive |
| ZEB1    | AC069549.1  | 0.653439342591407 | 2.11086268178966e-51 | postive |
| IREB2   | AL353804.2  | 0.517983994798565 | 1.36103808782426e-29 | postive |
| ZEB1    | MAGI2-AS3   | 0.509714779124155 | 1.46660741220596e-28 | postive |
| NCOA4   | AL731577.2  | 0.509514741927382 | 1.55217713437601e-28 | postive |
| IREB2   | AL731577.2  | 0.510596560037345 | 1.14172095229732e-28 | postive |
| PHKG2   | AC010618.2  | 0.515829168784463 | 2.54469571510175e-29 | postive |
| IREB2   | AC008115.3  | 0.512449958818533 | 6.72878175482729e-29 | postive |

|         |            |                   |                      |         |
|---------|------------|-------------------|----------------------|---------|
| IREB2   | AC087294.1 | 0.508776658853081 | 1.91279785104834e-28 | postive |
| SLC7A11 | AC138207.4 | 0.661648063287971 | 4.26546538129047e-53 | postive |
| ZEB1    | AC138207.4 | 0.597205635522151 | 4.41210905289498e-41 | postive |
| IREB2   | PRC1-AS1   | 0.505044912767734 | 5.45781443889601e-28 | postive |
| ZEB1    | AC005740.4 | 0.558018871986049 | 5.16463547413856e-35 | postive |
| ZEB1    | FENDRR     | 0.806205084035172 | 2.87859558593042e-95 | postive |
| SLC7A11 | AC234772.2 | 0.668865331422596 | 1.24532979701626e-54 | postive |
| ZEB1    | AC234772.2 | 0.659951471656457 | 9.6508068627277e-53  | postive |
| IREB2   | AL590729.1 | 0.553034224770499 | 2.68103740755203e-34 | postive |
| SLC7A11 | RASA3-IT1  | 0.599370529197694 | 1.92647424900658e-41 | postive |
| ZEB1    | RASA3-IT1  | 0.647468383023282 | 3.3438214760693e-50  | postive |
| CRYAB   | LINC00702  | 0.576440250603025 | 9.16357437530289e-38 | postive |
| IREB2   | AL133243.3 | 0.512879836387131 | 5.94944188302448e-29 | postive |
| ZEB1    | AL606534.1 | 0.551211160052863 | 4.86304967292644e-34 | postive |
| SLC7A11 | WWTR1-IT1  | 0.705509240796594 | 3.85093314176244e-63 | postive |
| ZEB1    | WWTR1-IT1  | 0.695016086538526 | 1.42355514380615e-60 | postive |
| SLC7A11 | AC093423.2 | 0.613193283147909 | 8.33438360726458e-44 | postive |
| ZEB1    | AC093423.2 | 0.656406252853428 | 5.22555686169219e-52 | postive |
| SLC7A11 | AL133445.2 | 0.579139364780764 | 3.50129133943076e-38 | postive |
| ZEB1    | AL133445.2 | 0.646545432408819 | 5.096842802925e-50   | postive |
| IREB2   | AL157838.1 | 0.53325010107564  | 1.4185557816989e-31  | postive |
| IREB2   | AC091057.1 | 0.543382308312758 | 6.01990039053772e-33 | postive |
| CRYAB   | AP003071.3 | 0.595750923266028 | 7.67255802450159e-41 | postive |
| IREB2   | AC073130.2 | 0.50383523621139  | 7.64583073637303e-28 | postive |
| ZEB1    | AL132642.1 | 0.59295649250819  | 2.20350135035416e-40 | postive |
| IREB2   | AC087276.3 | 0.510295594745831 | 1.2436980745184e-28  | postive |
| IREB2   | AC068790.6 | 0.500172220598666 | 2.10479726716322e-27 | postive |
| IREB2   | GTF3C2-AS1 | 0.523590744146862 | 2.61570192852627e-30 | postive |
| IREB2   | AC106820.5 | 0.515710042407315 | 2.6339258068279e-29  | postive |
| MT1G    | AC063919.1 | 0.768927168780757 | 1.78867974973691e-81 | postive |
| GCLM    | AL596223.1 | 0.506581063744777 | 3.55022425276854e-28 | postive |
| SLC7A11 | AL596223.1 | 0.764012482685731 | 7.53975585391193e-80 | postive |
| ZEB1    | AL596223.1 | 0.520253327116891 | 7.00742127665805e-30 | postive |
| ABCC1   | AL596223.1 | 0.538299902937231 | 2.9767070269694e-32  | postive |
| IREB2   | AL117329.1 | 0.528620172630013 | 5.80255447733718e-31 | postive |
| IREB2   | AC015849.3 | 0.552790963247116 | 2.90336775642944e-34 | postive |
| IREB2   | AC022272.1 | 0.525940959674666 | 1.29823539986951e-30 | postive |
| IREB2   | AP001020.3 | 0.506883358864918 | 3.26130606456745e-28 | postive |
| SLC7A11 | LINC02595  | 0.537709302443676 | 3.57796803865416e-32 | postive |
| IREB2   | AL139353.2 | 0.518199692311897 | 1.27808483557673e-29 | postive |
| ZEB1    | GSN-AS1    | 0.588396282712777 | 1.20578982494491e-39 | postive |
| IREB2   | GSN-AS1    | 0.532214918900198 | 1.94737576041731e-31 | postive |
| IREB2   | FTX        | 0.52906857495567  | 5.06735657275784e-31 | postive |
| IREB2   | AC005519.1 | 0.500834178060936 | 1.75439591903669e-27 | postive |

|         |            |                   |                      |         |
|---------|------------|-------------------|----------------------|---------|
| MT1G    | AC016924.1 | 0.603579513027879 | 3.77729861822847e-42 | postive |
| ZEB1    | AC099811.5 | 0.531013593143075 | 2.80895022415922e-31 | postive |
| IREB2   | AC099811.5 | 0.519433758336862 | 8.91111956289359e-30 | postive |
| IREB2   | SPAG5-AS1  | 0.505214495389893 | 5.20532221185612e-28 | postive |
| ZEB1    | TGFB2-AS1  | 0.500481150617343 | 1.93341251399962e-27 | postive |
| IREB2   | CDC42-IT1  | 0.50308505610628  | 9.41727304042659e-28 | postive |
| SLC7A11 | SBF2-AS1   | 0.54413482937673  | 4.74026854924565e-33 | postive |
| SLC7A11 | AL133415.1 | 0.500551107110959 | 1.89656012778592e-27 | postive |
| ZEB1    | AL133415.1 | 0.608396431806035 | 5.68032837002867e-43 | postive |
| PHKG2   | AC106782.5 | 0.600534096603427 | 1.23084055173433e-41 | postive |
| ZEB1    | AC093010.2 | 0.566763976290889 | 2.68293423139715e-36 | postive |
| IREB2   | AC105339.2 | 0.500224127339372 | 2.07498668805981e-27 | postive |
| ZEB1    | SOCAR      | 0.601285719048737 | 9.20656712028132e-42 | postive |
| ZEB1    | RNF216-IT1 | 0.568419244299246 | 1.51762178279357e-36 | postive |
| IREB2   | AC087301.1 | 0.507770346460521 | 2.54104751661927e-28 | postive |
| ACO1    | LINC00092  | 0.586041790801261 | 2.86967308222369e-39 | postive |
| ZEB1    | AC087286.4 | 0.508034059391568 | 2.3590063672731e-28  | postive |
| IREB2   | AC087286.4 | 0.507797698163623 | 2.52153908233963e-28 | postive |
| PHKG2   | AC092119.2 | 0.517162844736837 | 1.72847084336693e-29 | postive |
| AKR1C1  | LINC01697  | 0.603068253345738 | 4.60990502411418e-42 | postive |
| GCLM    | LINC01697  | 0.592681295926722 | 2.44338985181513e-40 | postive |
| SLC7A11 | LINC01697  | 0.551672662903578 | 4.1840190862199e-34  | postive |
| ABCC1   | LINC01697  | 0.502436442943172 | 1.12717798102453e-27 | postive |
| IREB2   | RORA-AS1   | 0.54460714743691  | 4.07875617290343e-33 | postive |
