# Supplementary figures and images for: Ferroptosis‐Related Long Noncoding RNAs Have Excellent Predictive Ability for Multiomic Characteristics of Bladder Cancer
Source: Hindawi journal article supplement (doi:10.1155/2022/9316847), 2022-01-01

A

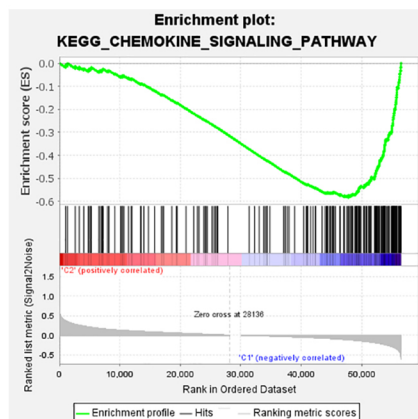

B

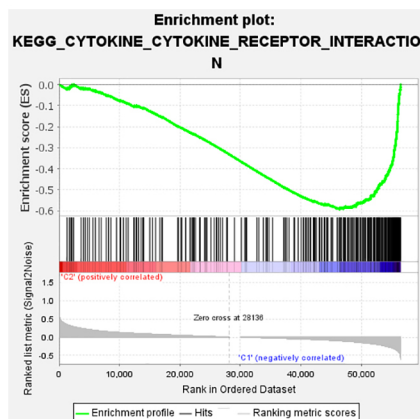

C

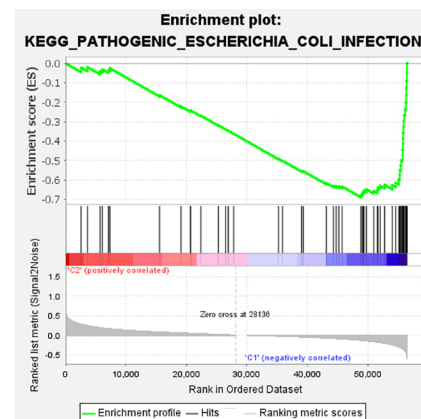

D

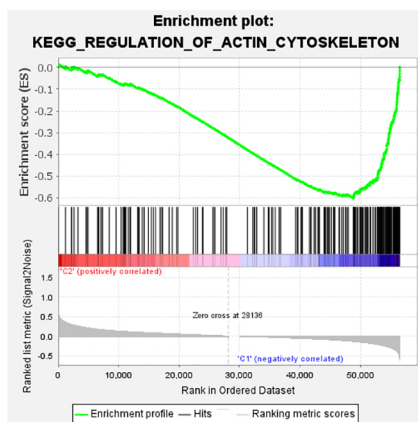

E

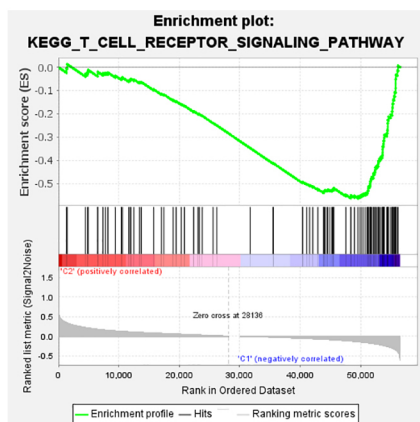

F

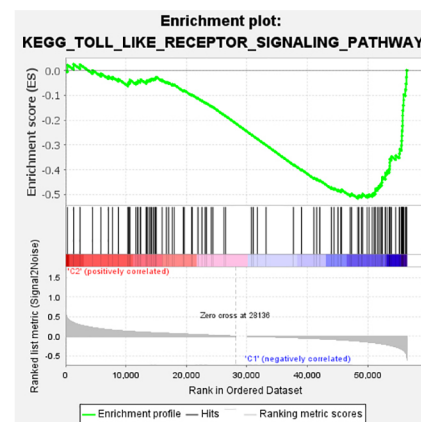

G

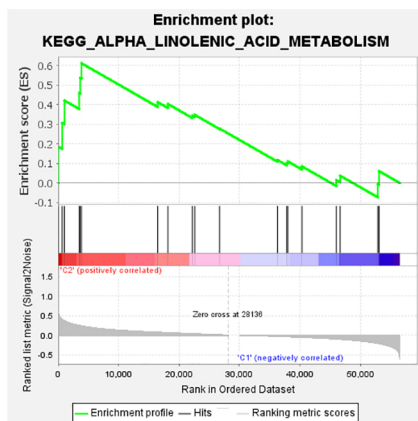

H

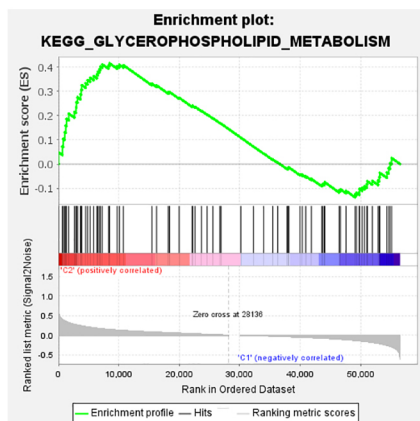

I

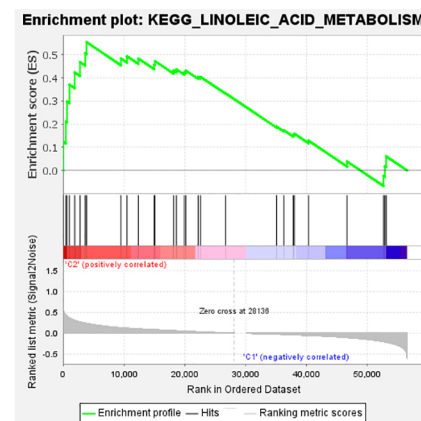

Supplement: f1 [file 9316847.f1.zip]
